# Supplementary material for: Genome-Wide Mapping of the Cohesin Complex in the Yeast Saccharomyces cerevisiae
Source: PLoS Biol. 2004 Jul 27;2(9):e259. doi: 10.1371/journal.pbio.0020259 (PMC490026; doi:10.1371/journal.pbio.0020259)
Supplement: Dataset S10 — Cy3 = ChIP cdc16-ts Mcd1-6HA in A364a; Cy5 = genomic DNA. (4.6 MB XLS). [file pbio.0020259.sd010.xls]

ATF	1.0
27	82    
"Type=GenePix Results 2"
"DateTime=2003/04/19 11:35:44"
"Settings=L:\cohesin3\UP2_183.gps"
"GalFile=L:\arraying&printing\P2uber022803.GAL"
"PixelSize=10"
"Wavelengths=635	532"
"ImageFiles=L:\cohesin3\UP2_183_635.tif 0	L:\cohesin3\UP2_183_532.tif 0"
"NormalizationMethod=None"
"NormalizationFactors=1	1"
"JpegImage="
"RatioFormulations=W1/W2 (635/532)"
"Barcode="
"BackgroundSubtraction=LocalFeature"
"ImageOrigin=1500, 13930"
"JpegOrigin=1780, 13940"
"Creator=GenePix Pro 4.0.1.9"
"Scanner=GenePix 4000B [87097]"
"FocusPosition=0"
"Temperature=30.69"
"LinesAveraged=1"
"Comment=Cy5=total gDNA Cy3=NDC10 mcd1HA NZ HA ChIP S288c"
"PMTGain=580	610"
"ScanPower=100	100"
"LaserPower=3.31	3.81"
"LaserOnTime=20824	20837"
"ScanRegion=150,1393,2040,4992"
"Supplier="
"Block"	"Column"	"Row"	"Name"	"ID"	"X"	"Y"	"Dia."	"F635 Median"	"F635 Mean"	"F635 SD"	"B635 Median"	"B635 Mean"	"B635 SD"	"% > B635+1SD"	"% > B635+2SD"	"F635 % Sat."	"F532 Median"	"F532 Mean"	"F532 SD"	"B532 Median"	"B532 Mean"	"B532 SD"	"% > B532+1SD"	"% > B532+2SD"	"F532 % Sat."	"F3 Median"	"F3 Mean"	"F3 SD"	"B3 Median"	"B3 Mean"	"B3 SD"	"% > B3+1SD"	"% > B3+2SD"	"F3 % Sat."	"F4 Median"	"F4 Mean"	"F4 SD"	"B4 Median"	"B4 Mean"	"B4 SD"	"% > B4+1SD"	"% > B4+2SD"	"F4 % Sat."	"Ratio of Medians (635/532)"	"Ratio of Means (635/532)"	"Median of Ratios (635/532)"	"Mean of Ratios (635/532)"	"Ratios SD (635/532)"	"Rgn Ratio (635/532)"	"Rgn R� (635/532)"	"Ratio of Medians (Ratio/2)"	"Ratio of Means (Ratio/2)"	"Median of Ratios (Ratio/2)"	"Mean of Ratios (Ratio/2)"	"Ratios SD (Ratio/2)"	"Rgn Ratio (Ratio/2)"	"Rgn R� (Ratio/2)"	"Ratio of Medians (Ratio/3)"	"Ratio of Means (Ratio/3)"	"Median of Ratios (Ratio/3)"	"Mean of Ratios (Ratio/3)"	"Ratios SD (Ratio/3)"	"Rgn Ratio (Ratio/3)"	"Rgn R� (Ratio/3)"	"F Pixels"	"B Pixels"	"Sum of Medians"	"Sum of Means"	"Log Ratio (635/532)"	"Log Ratio (Ratio/2)"	"Log Ratio (Ratio/3)"	"F635 Median - B635"	"F532 Median - B532"	"F3 Median - B3"	"F4 Median - B4"	"F635 Mean - B635"	"F532 Mean - B532"	"F3 Mean - B3"	"F4 Mean - B4"	"Flags"	"Normalize"
1	1	1	"cdc27"	"YBL084C"	2050	14270	110	4326	3691	1661	74	142	482	88	82	0	5151	4618	2274	310	431	785	86	80	0	0	0	0	0	0	0	0	0	0	0	0	0	0	0	0	0	0	0	0.878	0.840	0.882	1.065	2.423	0.783	0.888	0.000	0.000	0.000	0.000	0.000	0.000	0.000	0.000	0.000	0.000	0.000	0.000	0.000	0.000	80	548	9093	7925	-0.187	Error	Error	4252	4841	0	0	3617	4308	0	0	0	0
1	2	1	""	"YBL113C"	2240	14270	110	37910	31063	14892	78	306	1606	95	88	0	28834	24670	10969	335	736	2629	91	85	0	0	0	0	0	0	0	0	0	0	0	0	0	0	0	0	0	0	0	1.327	1.273	1.258	1.173	1.449	1.316	0.915	0.000	0.000	0.000	0.000	0.000	0.000	0.000	0.000	0.000	0.000	0.000	0.000	0.000	0.000	80	542	66331	55320	0.409	Error	Error	37832	28499	0	0	30985	24335	0	0	0	0
1	3	1	""	"YBR030W"	2440	14270	120	7310	6446	2881	81	218	1421	89	81	0	3578	3288	1494	331	579	2332	71	5	0	0	0	0	0	0	0	0	0	0	0	0	0	0	0	0	0	0	0	2.226	2.153	2.194	2.266	1.550	2.169	0.897	0.000	0.000	0.000	0.000	0.000	0.000	0.000	0.000	0.000	0.000	0.000	0.000	0.000	0.000	120	636	10476	9322	1.155	Error	Error	7229	3247	0	0	6365	2957	0	0	0	0
1	4	1	""	"YBL086C"	2630	14270	120	5526	4883	2479	88	96	49	100	99	0	2197	1991	976	323	331	93	87	85	0	0	0	0	0	0	0	0	0	0	0	0	0	0	0	0	0	0	0	2.902	2.875	2.786	2.993	1.681	2.877	0.870	0.000	0.000	0.000	0.000	0.000	0.000	0.000	0.000	0.000	0.000	0.000	0.000	0.000	0.000	120	592	7312	6463	1.537	Error	Error	5438	1874	0	0	4795	1668	0	0	0	0
1	5	1	"RER2"	"YBR002C"	2810	14260	110	5519	4739	2298	89	162	582	88	88	0	9268	8412	4272	321	510	1424	87	81	0	0	0	0	0	0	0	0	0	0	0	0	0	0	0	0	0	0	0	0.607	0.575	0.589	0.584	1.602	0.550	0.897	0.000	0.000	0.000	0.000	0.000	0.000	0.000	0.000	0.000	0.000	0.000	0.000	0.000	0.000	80	504	14377	12741	-0.720	Error	Error	5430	8947	0	0	4650	8091	0	0	0	0
1	6	1	""	"YBR032W"	3020	14280	150	91	121	80	79	122	440	0	0	0	349	406	220	315	425	1076	0	0	0	0	0	0	0	0	0	0	0	0	0	0	0	0	0	0	0	0	0	0.353	0.462	0.300	0.313	2.947	0.348	0.854	0.000	0.000	0.000	0.000	0.000	0.000	0.000	0.000	0.000	0.000	0.000	0.000	0.000	0.000	156	892	46	133	-1.503	Error	Error	12	34	0	0	42	91	0	0	-50	0
1	7	1	"tel1"	"YBL088C"	3210	14260	110	368	341	155	81	87	48	83	80	0	705	634	279	307	316	85	80	72	0	0	0	0	0	0	0	0	0	0	0	0	0	0	0	0	0	0	0	0.721	0.795	0.676	0.622	2.409	0.602	0.631	0.000	0.000	0.000	0.000	0.000	0.000	0.000	0.000	0.000	0.000	0.000	0.000	0.000	0.000	80	462	685	587	-0.472	Error	Error	287	398	0	0	260	327	0	0	0	0
1	8	1	""	"YBR004C"	3380	14260	120	5468	4677	2043	85	114	274	94	91	0	26339	22511	10442	306	314	80	100	100	0	0	0	0	0	0	0	0	0	0	0	0	0	0	0	0	0	0	0	0.207	0.207	0.211	0.217	1.600	0.197	0.897	0.000	0.000	0.000	0.000	0.000	0.000	0.000	0.000	0.000	0.000	0.000	0.000	0.000	0.000	120	606	31416	26797	-2.274	Error	Error	5383	26033	0	0	4592	22205	0	0	0	0
1	9	1	"HMT1"	"YBR034C"	3580	14270	110	7754	6481	3548	89	121	294	92	91	0	7305	6313	3542	307	314	78	93	90	0	0	0	0	0	0	0	0	0	0	0	0	0	0	0	0	0	0	0	1.095	1.064	1.041	1.125	1.660	1.026	0.895	0.000	0.000	0.000	0.000	0.000	0.000	0.000	0.000	0.000	0.000	0.000	0.000	0.000	0.000	80	524	14663	12398	0.131	Error	Error	7665	6998	0	0	6392	6006	0	0	0	0
1	10	1	"MRP21"	"YBL090W"	3770	14270	120	9527	7878	3504	87	103	195	97	95	0	9773	8251	3713	308	317	94	99	96	0	0	0	0	0	0	0	0	0	0	0	0	0	0	0	0	0	0	0	0.997	0.981	0.978	1.024	1.757	0.964	0.917	0.000	0.000	0.000	0.000	0.000	0.000	0.000	0.000	0.000	0.000	0.000	0.000	0.000	0.000	120	612	18905	15734	-0.004	Error	Error	9440	9465	0	0	7791	7943	0	0	0	0
1	11	1	""	"YBR006W"	3950	14260	110	6546	5317	2522	84	127	347	93	90	0	30814	25626	12871	313	619	2595	88	85	0	0	0	0	0	0	0	0	0	0	0	0	0	0	0	0	0	0	0	0.212	0.207	0.209	0.214	1.500	0.195	0.893	0.000	0.000	0.000	0.000	0.000	0.000	0.000	0.000	0.000	0.000	0.000	0.000	0.000	0.000	80	495	36963	30546	-2.239	Error	Error	6462	30501	0	0	5233	25313	0	0	0	0
1	12	1	"CSG2"	"YBR036C"	4140	14300	120	7114	6289	2836	80	113	271	99	95	0	6326	5596	2591	315	582	2400	80	68	0	0	0	0	0	0	0	0	0	0	0	0	0	0	0	0	0	0	0	1.170	1.176	1.151	1.243	1.689	1.036	0.702	0.000	0.000	0.000	0.000	0.000	0.000	0.000	0.000	0.000	0.000	0.000	0.000	0.000	0.000	120	580	13045	11490	0.227	Error	Error	7034	6011	0	0	6209	5281	0	0	0	0
1	13	1	""	"YCL048W"	4320	14290	120	7836	6765	3000	78	86	70	100	99	0	10685	9496	4387	312	327	183	98	97	0	0	0	0	0	0	0	0	0	0	0	0	0	0	0	0	0	0	0	0.748	0.728	0.728	0.775	1.735	0.703	0.918	0.000	0.000	0.000	0.000	0.000	0.000	0.000	0.000	0.000	0.000	0.000	0.000	0.000	0.000	120	585	18131	15871	-0.419	Error	Error	7758	10373	0	0	6687	9184	0	0	0	0
1	14	1	""	"YCR010C"	4520	14290	120	9664	8284	3409	83	92	94	100	99	0	25434	22436	9653	314	327	129	100	100	0	0	0	0	0	0	0	0	0	0	0	0	0	0	0	0	0	0	0	0.381	0.371	0.373	0.379	1.621	0.355	0.902	0.000	0.000	0.000	0.000	0.000	0.000	0.000	0.000	0.000	0.000	0.000	0.000	0.000	0.000	120	614	34701	30323	-1.391	Error	Error	9581	25120	0	0	8201	22122	0	0	0	0
1	15	1	"bud5"	"YCR038C"	4720	14290	120	9251	8519	4049	81	87	38	100	100	0	6622	6071	2869	318	325	86	98	97	0	0	0	0	0	0	0	0	0	0	0	0	0	0	0	0	0	0	0	1.455	1.467	1.457	1.523	1.539	1.442	0.894	0.000	0.000	0.000	0.000	0.000	0.000	0.000	0.000	0.000	0.000	0.000	0.000	0.000	0.000	120	570	15474	14191	0.541	Error	Error	9170	6304	0	0	8438	5753	0	0	0	0
1	16	1	"apa1"	"YCL050C"	4900	14290	120	7681	6512	3070	81	86	38	100	100	0	18853	16131	8253	319	326	90	98	98	0	0	0	0	0	0	0	0	0	0	0	0	0	0	0	0	0	0	0	0.410	0.407	0.401	0.432	1.841	0.378	0.881	0.000	0.000	0.000	0.000	0.000	0.000	0.000	0.000	0.000	0.000	0.000	0.000	0.000	0.000	120	548	26134	22243	-1.286	Error	Error	7600	18534	0	0	6431	15812	0	0	0	0
1	17	1	"PGK1"	"YCR012W"	5090	14290	130	3897	3419	1451	82	88	41	100	100	0	5789	5248	2230	316	329	90	99	97	0	0	0	0	0	0	0	0	0	0	0	0	0	0	0	0	0	0	0	0.697	0.677	0.675	0.701	1.694	0.660	0.879	0.000	0.000	0.000	0.000	0.000	0.000	0.000	0.000	0.000	0.000	0.000	0.000	0.000	0.000	120	623	9288	8269	-0.521	Error	Error	3815	5473	0	0	3337	4932	0	0	0	0
1	18	1	"MATalpha1"	"YCR040W"	5280	14300	120	7058	5885	2530	86	92	43	100	100	0	9426	8280	3363	314	326	89	99	99	0	0	0	0	0	0	0	0	0	0	0	0	0	0	0	0	0	0	0	0.765	0.728	0.740	0.744	1.645	0.710	0.903	0.000	0.000	0.000	0.000	0.000	0.000	0.000	0.000	0.000	0.000	0.000	0.000	0.000	0.000	120	547	16084	13765	-0.386	Error	Error	6972	9112	0	0	5799	7966	0	0	0	0
1	19	1	"PBN1"	"YCL052C"	5460	14290	110	4109	3399	2186	84	136	403	83	76	0	12873	11276	7220	315	595	1952	75	73	0	0	0	0	0	0	0	0	0	0	0	0	0	0	0	0	0	0	0	0.321	0.302	0.314	0.321	1.848	0.288	0.871	0.000	0.000	0.000	0.000	0.000	0.000	0.000	0.000	0.000	0.000	0.000	0.000	0.000	0.000	80	497	16583	14276	-1.642	Error	Error	4025	12558	0	0	3315	10961	0	0	0	0
1	20	1	"POL4"	"YCR014C"	5660	14300	120	4787	4160	1950	77	123	378	93	90	0	10440	9619	4772	310	557	1829	86	84	0	0	0	0	0	0	0	0	0	0	0	0	0	0	0	0	0	0	0	0.465	0.439	0.456	0.484	1.824	0.417	0.857	0.000	0.000	0.000	0.000	0.000	0.000	0.000	0.000	0.000	0.000	0.000	0.000	0.000	0.000	120	568	14840	13392	-1.105	Error	Error	4710	10130	0	0	4083	9309	0	0	0	0
1	21	1	"TSM1"	"YCR042C"	5850	14290	120	1792	1736	910	80	86	46	100	99	0	1502	1525	738	306	332	469	84	70	0	0	0	0	0	0	0	0	0	0	0	0	0	0	0	0	0	0	0	1.431	1.358	1.347	1.446	1.808	1.377	0.783	0.000	0.000	0.000	0.000	0.000	0.000	0.000	0.000	0.000	0.000	0.000	0.000	0.000	0.000	120	549	2908	2875	0.517	Error	Error	1712	1196	0	0	1656	1219	0	0	0	0
1	22	1	"KAR4"	"YCL055W"	6030	14300	120	3696	3414	1719	82	87	45	99	98	0	3422	3178	1588	314	339	455	87	80	0	0	0	0	0	0	0	0	0	0	0	0	0	0	0	0	0	0	0	1.163	1.163	1.208	1.250	1.675	1.082	0.794	0.000	0.000	0.000	0.000	0.000	0.000	0.000	0.000	0.000	0.000	0.000	0.000	0.000	0.000	120	586	6722	6196	0.218	Error	Error	3614	3108	0	0	3332	2864	0	0	0	0
1	1	2	""	"YCR016W"	2050	14480	110	6666	5859	3097	72	106	310	96	92	0	12473	10987	5393	303	465	1272	91	83	0	0	0	0	0	0	0	0	0	0	0	0	0	0	0	0	0	0	0	0.542	0.542	0.551	0.546	1.455	0.536	0.898	0.000	0.000	0.000	0.000	0.000	0.000	0.000	0.000	0.000	0.000	0.000	0.000	0.000	0.000	80	478	18764	16471	-0.884	Error	Error	6594	12170	0	0	5787	10684	0	0	0	0
1	2	2	""	"YCR044C"	2230	14480	120	9983	8626	3755	78	166	992	95	89	0	4051	3629	1655	332	539	1742	79	60	0	0	0	0	0	0	0	0	0	0	0	0	0	0	0	0	0	0	0	2.663	2.593	2.474	2.928	2.034	2.500	0.668	0.000	0.000	0.000	0.000	0.000	0.000	0.000	0.000	0.000	0.000	0.000	0.000	0.000	0.000	120	569	13624	11845	1.413	Error	Error	9905	3719	0	0	8548	3297	0	0	0	0
1	3	2	"rad57"	"YDR004W"	2430	14480	110	6464	5516	2315	89	149	444	95	87	0	37674	32513	13705	336	949	4503	90	86	0	0	0	0	0	0	0	0	0	0	0	0	0	0	0	0	0	0	0	0.171	0.169	0.170	0.166	1.472	0.159	0.921	0.000	0.000	0.000	0.000	0.000	0.000	0.000	0.000	0.000	0.000	0.000	0.000	0.000	0.000	80	503	43713	37604	-2.550	Error	Error	6375	37338	0	0	5427	32177	0	0	0	0
1	4	2	""	"YDR034C-C"	2620	14480	120	65535	56182	17175	103	170	448	100	100	54	32476	29474	9893	340	922	4354	95	92	0	0	0	0	0	0	0	0	0	0	0	0	0	0	0	0	0	0	0	2.036	1.925	1.900	1.961	1.498	1.915	0.856	0.000	0.000	0.000	0.000	0.000	0.000	0.000	0.000	0.000	0.000	0.000	0.000	0.000	0.000	120	540	97568	85213	1.026	Error	Error	65432	32136	0	0	56079	29134	0	0	0	0
1	5	2	"RPS13"	"YDR064W"	2810	14480	120	7694	6679	2610	91	133	395	99	95	0	5039	4507	1763	323	388	779	91	88	0	0	0	0	0	0	0	0	0	0	0	0	0	0	0	0	0	0	0	1.612	1.575	1.606	1.659	1.724	1.560	0.905	0.000	0.000	0.000	0.000	0.000	0.000	0.000	0.000	0.000	0.000	0.000	0.000	0.000	0.000	120	547	12319	10772	0.689	Error	Error	7603	4716	0	0	6588	4184	0	0	0	0
1	6	2	"SOK1"	"YDR006C"	3000	14480	120	3729	3904	1961	80	138	573	94	91	0	4381	4778	2526	314	388	738	93	88	0	0	0	0	0	0	0	0	0	0	0	0	0	0	0	0	0	0	0	0.897	0.857	0.900	0.904	1.776	0.847	0.803	0.000	0.000	0.000	0.000	0.000	0.000	0.000	0.000	0.000	0.000	0.000	0.000	0.000	0.000	120	507	7716	8288	-0.156	Error	Error	3649	4067	0	0	3824	4464	0	0	0	0
1	7	2	""	"YDR034W-B"	3190	14480	120	1560	1458	595	79	140	725	82	55	0	1293	1256	454	311	399	827	60	5	0	0	0	0	0	0	0	0	0	0	0	0	0	0	0	0	0	0	0	1.508	1.459	1.404	1.474	1.552	1.453	0.828	0.000	0.000	0.000	0.000	0.000	0.000	0.000	0.000	0.000	0.000	0.000	0.000	0.000	0.000	120	562	2463	2324	0.593	Error	Error	1481	982	0	0	1379	945	0	0	0	0
1	8	2	""	"YDR066C"	3380	14480	120	5968	5445	2294	82	89	56	100	100	0	15609	14451	5561	312	322	106	100	99	0	0	0	0	0	0	0	0	0	0	0	0	0	0	0	0	0	0	0	0.385	0.379	0.384	0.368	1.471	0.375	0.932	0.000	0.000	0.000	0.000	0.000	0.000	0.000	0.000	0.000	0.000	0.000	0.000	0.000	0.000	120	536	21183	19502	-1.378	Error	Error	5886	15297	0	0	5363	14139	0	0	0	0
1	9	2	""	"YDR008C"	3560	14480	120	2965	2570	966	85	95	103	99	98	0	2179	1988	725	318	329	135	96	93	0	0	0	0	0	0	0	0	0	0	0	0	0	0	0	0	0	0	0	1.548	1.488	1.474	1.506	1.569	1.453	0.873	0.000	0.000	0.000	0.000	0.000	0.000	0.000	0.000	0.000	0.000	0.000	0.000	0.000	0.000	120	548	4741	4155	0.630	Error	Error	2880	1861	0	0	2485	1670	0	0	0	0
1	10	2	""	"YDR036C"	3760	14480	120	13078	11092	5220	86	93	59	100	99	0	13739	12284	5613	310	353	465	97	95	0	0	0	0	0	0	0	0	0	0	0	0	0	0	0	0	0	0	0	0.967	0.919	0.940	0.919	1.484	0.913	0.897	0.000	0.000	0.000	0.000	0.000	0.000	0.000	0.000	0.000	0.000	0.000	0.000	0.000	0.000	120	562	26421	22980	-0.048	Error	Error	12992	13429	0	0	11006	11974	0	0	0	0
1	11	2	"DOS2"	"YDR068W"	3960	14480	120	10488	9080	3893	88	108	240	99	95	0	19682	17397	7341	319	433	1741	92	91	0	0	0	0	0	0	0	0	0	0	0	0	0	0	0	0	0	0	0	0.537	0.527	0.537	0.537	1.530	0.510	0.908	0.000	0.000	0.000	0.000	0.000	0.000	0.000	0.000	0.000	0.000	0.000	0.000	0.000	0.000	120	582	29763	26070	-0.897	Error	Error	10400	19363	0	0	8992	17078	0	0	0	0
1	12	2	""	"YDR010C"	4140	14470	110	4062	3217	1788	90	177	439	83	77	0	2932	2455	1228	327	410	456	78	78	0	0	0	0	0	0	0	0	0	0	0	0	0	0	0	0	0	0	0	1.525	1.469	1.461	1.512	1.515	1.469	0.885	0.000	0.000	0.000	0.000	0.000	0.000	0.000	0.000	0.000	0.000	0.000	0.000	0.000	0.000	80	455	6577	5255	0.609	Error	Error	3972	2605	0	0	3127	2128	0	0	0	0
1	13	2	"ENA5"	"YDR038C"	4330	14470	110	5267	5245	2592	90	329	1141	91	82	0	5972	5916	2770	329	600	1201	90	85	0	0	0	0	0	0	0	0	0	0	0	0	0	0	0	0	0	0	0	0.917	0.923	0.948	0.985	1.673	0.933	0.804	0.000	0.000	0.000	0.000	0.000	0.000	0.000	0.000	0.000	0.000	0.000	0.000	0.000	0.000	80	501	10820	10742	-0.124	Error	Error	5177	5643	0	0	5155	5587	0	0	0	0
1	14	2	""	"YDR070C"	4520	14470	110	2590	2150	1048	94	357	1256	75	48	0	2628	2285	1114	323	608	1214	77	41	0	0	0	0	0	0	0	0	0	0	0	0	0	0	0	0	0	0	0	1.083	1.048	1.050	1.038	1.535	0.990	0.777	0.000	0.000	0.000	0.000	0.000	0.000	0.000	0.000	0.000	0.000	0.000	0.000	0.000	0.000	80	510	4801	4018	0.115	Error	Error	2496	2305	0	0	2056	1962	0	0	0	0
1	15	2	""	"YDR366C"	4720	14460	110	18657	15247	10105	96	265	955	86	81	0	20157	15955	10603	324	592	1721	81	75	0	0	0	0	0	0	0	0	0	0	0	0	0	0	0	0	0	0	0	0.936	0.969	0.969	0.936	1.758	0.910	0.896	0.000	0.000	0.000	0.000	0.000	0.000	0.000	0.000	0.000	0.000	0.000	0.000	0.000	0.000	80	496	38394	30782	-0.096	Error	Error	18561	19833	0	0	15151	15631	0	0	0	0
1	16	2	""	"YDR398W"	4910	14470	120	4707	4859	2733	91	151	625	93	87	0	2973	2880	1454	316	494	1612	71	32	0	0	0	0	0	0	0	0	0	0	0	0	0	0	0	0	0	0	0	1.737	1.860	1.833	2.011	1.927	1.903	0.798	0.000	0.000	0.000	0.000	0.000	0.000	0.000	0.000	0.000	0.000	0.000	0.000	0.000	0.000	120	529	7273	7332	0.797	Error	Error	4616	2657	0	0	4768	2564	0	0	0	0
1	17	2	""	"YDR430C"	5100	14470	120	4581	4621	2642	84	90	45	100	100	0	2908	2833	1351	311	321	95	98	95	0	0	0	0	0	0	0	0	0	0	0	0	0	0	0	0	0	0	0	1.732	1.799	1.740	1.805	1.474	2.054	0.827	0.000	0.000	0.000	0.000	0.000	0.000	0.000	0.000	0.000	0.000	0.000	0.000	0.000	0.000	120	512	7094	7059	0.792	Error	Error	4497	2597	0	0	4537	2522	0	0	0	0
1	18	2	"YPR1"	"YDR368W"	5290	14470	120	3580	3291	1368	81	94	170	100	95	0	6488	5994	2664	306	318	135	99	97	0	0	0	0	0	0	0	0	0	0	0	0	0	0	0	0	0	0	0	0.566	0.564	0.570	0.588	1.648	0.536	0.848	0.000	0.000	0.000	0.000	0.000	0.000	0.000	0.000	0.000	0.000	0.000	0.000	0.000	0.000	120	519	9681	8898	-0.821	Error	Error	3499	6182	0	0	3210	5688	0	0	0	0
1	19	2	""	"YDR400W"	5490	14470	120	7646	6750	2927	82	124	374	98	95	0	12808	11699	5017	314	528	1713	94	90	0	0	0	0	0	0	0	0	0	0	0	0	0	0	0	0	0	0	0	0.605	0.586	0.591	0.584	1.545	0.567	0.902	0.000	0.000	0.000	0.000	0.000	0.000	0.000	0.000	0.000	0.000	0.000	0.000	0.000	0.000	120	530	20058	18053	-0.724	Error	Error	7564	12494	0	0	6668	11385	0	0	0	0
1	20	2	"NPL3"	"YDR432W"	5670	14470	120	8141	7141	3303	82	92	191	100	97	0	4574	3988	1895	308	332	319	94	88	0	0	0	0	0	0	0	0	0	0	0	0	0	0	0	0	0	0	0	1.889	1.918	1.873	1.874	1.462	1.897	0.875	0.000	0.000	0.000	0.000	0.000	0.000	0.000	0.000	0.000	0.000	0.000	0.000	0.000	0.000	120	514	12325	10739	0.918	Error	Error	8059	4266	0	0	7059	3680	0	0	0	0
1	21	2	""	"YDR370C"	5880	14470	120	10734	9271	3638	86	90	38	100	100	0	5077	4678	1701	317	326	95	98	98	0	0	0	0	0	0	0	0	0	0	0	0	0	0	0	0	0	0	0	2.237	2.106	2.049	2.062	1.579	2.217	0.878	0.000	0.000	0.000	0.000	0.000	0.000	0.000	0.000	0.000	0.000	0.000	0.000	0.000	0.000	120	490	15408	13546	1.162	Error	Error	10648	4760	0	0	9185	4361	0	0	0	0
1	22	2	"DIT2"	"YDR402C"	6050	14470	120	4139	3894	1627	88	94	52	100	100	0	8759	8552	3327	326	336	119	99	99	0	0	0	0	0	0	0	0	0	0	0	0	0	0	0	0	0	0	0	0.480	0.463	0.461	0.449	1.489	0.444	0.888	0.000	0.000	0.000	0.000	0.000	0.000	0.000	0.000	0.000	0.000	0.000	0.000	0.000	0.000	120	555	12484	12032	-1.058	Error	Error	4051	8433	0	0	3806	8226	0	0	0	0
1	1	3	""	"YDR434W"	2080	14660	120	7991	7560	4098	72	127	457	91	89	0	10777	9906	5368	322	444	1161	86	85	0	0	0	0	0	0	0	0	0	0	0	0	0	0	0	0	0	0	0	0.757	0.781	0.786	0.815	1.638	0.748	0.910	0.000	0.000	0.000	0.000	0.000	0.000	0.000	0.000	0.000	0.000	0.000	0.000	0.000	0.000	120	594	18374	17072	-0.401	Error	Error	7919	10455	0	0	7488	9584	0	0	0	0
1	2	3	""	"YDR372C"	2260	14670	120	6826	5662	3265	77	103	320	92	88	0	9545	8181	4855	331	374	607	88	81	0	0	0	0	0	0	0	0	0	0	0	0	0	0	0	0	0	0	0	0.732	0.711	0.726	0.799	1.958	0.674	0.904	0.000	0.000	0.000	0.000	0.000	0.000	0.000	0.000	0.000	0.000	0.000	0.000	0.000	0.000	120	532	15963	13435	-0.449	Error	Error	6749	9214	0	0	5585	7850	0	0	0	0
1	3	3	"rpb7"	"YDR404C"	2450	14660	110	5524	5152	3409	87	160	430	85	80	0	5565	5260	3247	328	652	2594	73	50	0	0	0	0	0	0	0	0	0	0	0	0	0	0	0	0	0	0	0	1.038	1.027	1.046	1.071	1.712	1.028	0.895	0.000	0.000	0.000	0.000	0.000	0.000	0.000	0.000	0.000	0.000	0.000	0.000	0.000	0.000	80	520	10674	9997	0.054	Error	Error	5437	5237	0	0	5065	4932	0	0	0	0
1	4	3	"PPZ2"	"YDR436W"	2660	14660	120	7742	6819	3799	88	146	336	98	92	0	4727	4106	2241	318	425	721	85	75	0	0	0	0	0	0	0	0	0	0	0	0	0	0	0	0	0	0	0	1.736	1.777	1.811	1.810	1.518	1.827	0.895	0.000	0.000	0.000	0.000	0.000	0.000	0.000	0.000	0.000	0.000	0.000	0.000	0.000	0.000	120	557	12063	10519	0.796	Error	Error	7654	4409	0	0	6731	3788	0	0	0	0
1	5	3	"LSM4"	"YER112W"	2840	14660	110	6563	5893	2653	83	256	1016	88	83	0	6207	5740	2641	303	523	1134	85	82	0	0	0	0	0	0	0	0	0	0	0	0	0	0	0	0	0	0	0	1.098	1.069	1.083	1.130	1.568	1.032	0.902	0.000	0.000	0.000	0.000	0.000	0.000	0.000	0.000	0.000	0.000	0.000	0.000	0.000	0.000	80	479	12384	11247	0.134	Error	Error	6480	5904	0	0	5810	5437	0	0	0	0
1	6	3	"COX15"	"YER141W"	3030	14660	110	10336	9962	5225	87	605	2143	87	81	0	10683	10075	4932	309	966	2362	87	81	0	0	0	0	0	0	0	0	0	0	0	0	0	0	0	0	0	0	0	0.988	1.011	0.990	1.000	1.513	1.020	0.903	0.000	0.000	0.000	0.000	0.000	0.000	0.000	0.000	0.000	0.000	0.000	0.000	0.000	0.000	80	511	20623	19641	-0.017	Error	Error	10249	10374	0	0	9875	9766	0	0	0	0
1	7	3	"BRR2"	"YER172C"	3220	14660	110	442	429	220	82	446	1933	0	0	0	856	845	438	307	763	2131	0	0	0	0	0	0	0	0	0	0	0	0	0	0	0	0	0	0	0	0	0	0.656	0.645	0.579	0.557	2.351	0.692	0.901	0.000	0.000	0.000	0.000	0.000	0.000	0.000	0.000	0.000	0.000	0.000	0.000	0.000	0.000	80	512	909	885	-0.609	Error	Error	360	549	0	0	347	538	0	0	0	0
1	8	3	"BOI2"	"YER114C"	3420	14660	110	3815	3376	1846	85	159	451	87	82	0	2056	1864	977	313	379	348	81	77	0	0	0	0	0	0	0	0	0	0	0	0	0	0	0	0	0	0	0	2.140	2.122	2.052	2.265	1.765	2.107	0.845	0.000	0.000	0.000	0.000	0.000	0.000	0.000	0.000	0.000	0.000	0.000	0.000	0.000	0.000	80	515	5473	4842	1.098	Error	Error	3730	1743	0	0	3291	1551	0	0	0	0
1	9	3	"DDI1"	"YER143W"	3610	14660	110	8581	7780	4315	89	204	638	91	90	0	22303	19588	11090	321	699	2663	82	78	0	0	0	0	0	0	0	0	0	0	0	0	0	0	0	0	0	0	0	0.386	0.399	0.407	0.426	1.679	0.373	0.902	0.000	0.000	0.000	0.000	0.000	0.000	0.000	0.000	0.000	0.000	0.000	0.000	0.000	0.000	80	514	30474	26958	-1.372	Error	Error	8492	21982	0	0	7691	19267	0	0	0	0
1	10	3	"GRX4"	"YER174C"	3800	14660	110	3845	3606	1895	90	190	579	85	81	0	3857	3502	1835	327	735	2701	63	5	0	0	0	0	0	0	0	0	0	0	0	0	0	0	0	0	0	0	0	1.064	1.107	1.093	1.046	1.495	1.069	0.898	0.000	0.000	0.000	0.000	0.000	0.000	0.000	0.000	0.000	0.000	0.000	0.000	0.000	0.000	80	513	7285	6691	0.089	Error	Error	3755	3530	0	0	3516	3175	0	0	0	0
1	11	3	""	"YER116C"	3990	14660	110	7428	6163	3080	91	287	1044	83	80	0	3120	2720	1354	327	499	765	80	73	0	0	0	0	0	0	0	0	0	0	0	0	0	0	0	0	0	0	0	2.627	2.537	2.545	2.706	1.659	2.565	0.872	0.000	0.000	0.000	0.000	0.000	0.000	0.000	0.000	0.000	0.000	0.000	0.000	0.000	0.000	80	511	10130	8465	1.393	Error	Error	7337	2793	0	0	6072	2393	0	0	0	0
1	12	3	"FTR1"	"YER145C"	4180	14660	110	6811	6745	3529	92	426	1450	83	82	0	4099	3871	2067	325	566	922	82	76	0	0	0	0	0	0	0	0	0	0	0	0	0	0	0	0	0	0	0	1.780	1.876	1.921	2.074	1.895	1.844	0.893	0.000	0.000	0.000	0.000	0.000	0.000	0.000	0.000	0.000	0.000	0.000	0.000	0.000	0.000	80	543	10493	10199	0.832	Error	Error	6719	3774	0	0	6653	3546	0	0	0	0
1	13	3	"ECM32"	"YER176W"	4370	14660	110	2671	2784	1786	86	356	1299	81	50	0	1484	1487	815	306	530	1018	60	16	0	0	0	0	0	0	0	0	0	0	0	0	0	0	0	0	0	0	0	2.194	2.285	2.208	2.326	1.635	2.155	0.588	0.000	0.000	0.000	0.000	0.000	0.000	0.000	0.000	0.000	0.000	0.000	0.000	0.000	0.000	80	552	3763	3879	1.134	Error	Error	2585	1178	0	0	2698	1181	0	0	0	0
1	14	3	"SSU81"	"YER118C"	4560	14660	110	12848	11146	5581	90	333	1388	88	80	0	20977	18453	9632	318	838	3065	85	81	0	0	0	0	0	0	0	0	0	0	0	0	0	0	0	0	0	0	0	0.618	0.610	0.633	0.622	1.505	0.580	0.921	0.000	0.000	0.000	0.000	0.000	0.000	0.000	0.000	0.000	0.000	0.000	0.000	0.000	0.000	80	543	33417	29191	-0.695	Error	Error	12758	20659	0	0	11056	18135	0	0	0	0
1	15	3	""	"YER147C"	4750	14670	110	7372	6493	2895	92	459	1688	87	82	0	4394	4059	1649	332	960	3180	70	1	0	0	0	0	0	0	0	0	0	0	0	0	0	0	0	0	0	0	0	1.792	1.717	1.717	1.692	1.586	1.714	0.803	0.000	0.000	0.000	0.000	0.000	0.000	0.000	0.000	0.000	0.000	0.000	0.000	0.000	0.000	80	559	11342	10128	0.842	Error	Error	7280	4062	0	0	6401	3727	0	0	0	0
1	16	3	"pda1"	"YER178W"	4950	14660	110	6751	6055	3276	89	336	1185	85	83	0	10413	9250	5168	320	625	1462	86	78	0	0	0	0	0	0	0	0	0	0	0	0	0	0	0	0	0	0	0	0.660	0.668	0.658	0.710	1.596	0.633	0.903	0.000	0.000	0.000	0.000	0.000	0.000	0.000	0.000	0.000	0.000	0.000	0.000	0.000	0.000	80	536	16755	14896	-0.599	Error	Error	6662	10093	0	0	5966	8930	0	0	0	0
1	17	3	"pmr1"	"YGL167C"	5140	14670	110	317	287	115	83	146	511	0	0	0	623	579	260	316	491	1293	0	0	0	0	0	0	0	0	0	0	0	0	0	0	0	0	0	0	0	0	0	0.762	0.776	0.690	0.615	2.528	0.516	0.481	0.000	0.000	0.000	0.000	0.000	0.000	0.000	0.000	0.000	0.000	0.000	0.000	0.000	0.000	80	516	541	467	-0.392	Error	Error	234	307	0	0	204	263	0	0	0	0
1	18	3	""	"YGL199C"	5320	14670	110	4534	3936	1837	77	191	683	86	83	0	1990	1807	779	312	374	355	85	81	0	0	0	0	0	0	0	0	0	0	0	0	0	0	0	0	0	0	0	2.656	2.581	2.654	2.649	1.486	2.591	0.890	0.000	0.000	0.000	0.000	0.000	0.000	0.000	0.000	0.000	0.000	0.000	0.000	0.000	0.000	80	525	6135	5354	1.409	Error	Error	4457	1678	0	0	3859	1495	0	0	0	0
1	19	3	""	"YGL230C"	5510	14670	110	3126	2574	1325	78	234	751	80	72	0	6207	5449	2678	311	519	1002	83	78	0	0	0	0	0	0	0	0	0	0	0	0	0	0	0	0	0	0	0	0.517	0.486	0.506	0.493	1.598	0.471	0.896	0.000	0.000	0.000	0.000	0.000	0.000	0.000	0.000	0.000	0.000	0.000	0.000	0.000	0.000	80	525	8944	7634	-0.952	Error	Error	3048	5896	0	0	2496	5138	0	0	0	0
1	20	3	"SUA5"	"YGL169W"	5700	14670	110	5769	5141	2137	84	283	890	93	90	0	7002	6555	2857	322	761	1716	88	80	0	0	0	0	0	0	0	0	0	0	0	0	0	0	0	0	0	0	0	0.851	0.811	0.809	0.835	1.474	0.753	0.898	0.000	0.000	0.000	0.000	0.000	0.000	0.000	0.000	0.000	0.000	0.000	0.000	0.000	0.000	80	526	12365	11290	-0.233	Error	Error	5685	6680	0	0	5057	6233	0	0	0	0
1	21	3	"MCM6"	"YGL201C"	5890	14670	110	1128	1271	1011	88	270	845	67	12	0	1380	1532	942	330	671	1479	30	6	0	0	0	0	0	0	0	0	0	0	0	0	0	0	0	0	0	0	0	0.990	0.984	0.928	0.999	1.743	0.683	0.641	0.000	0.000	0.000	0.000	0.000	0.000	0.000	0.000	0.000	0.000	0.000	0.000	0.000	0.000	80	524	2090	2385	-0.014	Error	Error	1040	1050	0	0	1183	1202	0	0	0	0
1	22	3	""	"YGL232W"	6080	14670	110	4447	3845	1456	94	209	583	97	92	0	9048	7977	3276	333	661	1610	93	86	0	0	0	0	0	0	0	0	0	0	0	0	0	0	0	0	0	0	0	0.499	0.491	0.487	0.507	1.313	0.456	0.905	0.000	0.000	0.000	0.000	0.000	0.000	0.000	0.000	0.000	0.000	0.000	0.000	0.000	0.000	80	556	13068	11395	-1.001	Error	Error	4353	8715	0	0	3751	7644	0	0	0	0
1	1	4	"ROK1"	"YGL171W"	2110	14870	110	9429	8409	3580	74	229	986	95	91	0	13672	12706	4913	317	561	1746	96	91	0	0	0	0	0	0	0	0	0	0	0	0	0	0	0	0	0	0	0	0.700	0.673	0.671	0.638	1.404	0.683	0.912	0.000	0.000	0.000	0.000	0.000	0.000	0.000	0.000	0.000	0.000	0.000	0.000	0.000	0.000	80	558	22710	20724	-0.514	Error	Error	9355	13355	0	0	8335	12389	0	0	0	0
1	2	4	"kex1"	"YGL203C"	2290	14860	110	8818	9192	4923	80	324	1272	96	90	0	4688	4787	2274	326	684	1922	86	60	0	0	0	0	0	0	0	0	0	0	0	0	0	0	0	0	0	0	0	2.003	2.043	2.123	2.092	1.622	1.930	0.665	0.000	0.000	0.000	0.000	0.000	0.000	0.000	0.000	0.000	0.000	0.000	0.000	0.000	0.000	80	501	13100	13573	1.002	Error	Error	8738	4362	0	0	9112	4461	0	0	0	0
1	3	4	"ade5,7"	"YGL234W"	2480	14860	110	10402	9426	3871	80	403	1585	95	90	0	4462	4223	1604	311	540	984	92	83	0	0	0	0	0	0	0	0	0	0	0	0	0	0	0	0	0	0	0	2.487	2.389	2.408	2.454	1.577	2.466	0.876	0.000	0.000	0.000	0.000	0.000	0.000	0.000	0.000	0.000	0.000	0.000	0.000	0.000	0.000	80	539	14473	13258	1.314	Error	Error	10322	4151	0	0	9346	3912	0	0	0	0
1	4	4	"KEM1"	"YGL173C"	2660	14860	110	1826	1994	1476	84	341	1388	61	13	0	1591	1615	984	300	462	709	73	43	0	0	0	0	0	0	0	0	0	0	0	0	0	0	0	0	0	0	0	1.349	1.452	1.350	1.373	1.915	1.762	0.756	0.000	0.000	0.000	0.000	0.000	0.000	0.000	0.000	0.000	0.000	0.000	0.000	0.000	0.000	80	522	3033	3225	0.432	Error	Error	1742	1291	0	0	1910	1315	0	0	0	0
1	5	4	"POX1"	"YGL205W"	2860	14860	110	8633	7943	4068	77	172	496	97	90	0	5724	5247	2569	277	386	605	88	85	0	0	0	0	0	0	0	0	0	0	0	0	0	0	0	0	0	0	0	1.571	1.583	1.651	1.700	1.562	1.665	0.876	0.000	0.000	0.000	0.000	0.000	0.000	0.000	0.000	0.000	0.000	0.000	0.000	0.000	0.000	80	569	14003	12836	0.651	Error	Error	8556	5447	0	0	7866	4970	0	0	0	0
1	6	4	""	"YGL236C"	3050	14860	110	8168	7287	3608	86	226	850	90	85	0	8836	7924	3797	292	538	1279	86	82	0	0	0	0	0	0	0	0	0	0	0	0	0	0	0	0	0	0	0	0.946	0.944	0.956	0.970	1.503	0.926	0.903	0.000	0.000	0.000	0.000	0.000	0.000	0.000	0.000	0.000	0.000	0.000	0.000	0.000	0.000	80	547	16626	14833	-0.080	Error	Error	8082	8544	0	0	7201	7632	0	0	0	0
1	7	4	"RNH70"	"YGR276C"	3250	14850	110	8441	6836	3279	82	204	675	96	87	0	4034	3552	1713	298	479	1013	80	76	0	0	0	0	0	0	0	0	0	0	0	0	0	0	0	0	0	0	0	2.237	2.076	2.066	2.197	1.415	2.079	0.896	0.000	0.000	0.000	0.000	0.000	0.000	0.000	0.000	0.000	0.000	0.000	0.000	0.000	0.000	80	547	12095	10008	1.162	Error	Error	8359	3736	0	0	6754	3254	0	0	0	0
1	8	4	""	"YHL010C"	3430	14860	110	10362	8924	3735	81	289	1237	92	87	0	5565	5032	1903	312	483	874	92	85	0	0	0	0	0	0	0	0	0	0	0	0	0	0	0	0	0	0	0	1.957	1.874	1.935	1.806	1.355	1.986	0.877	0.000	0.000	0.000	0.000	0.000	0.000	0.000	0.000	0.000	0.000	0.000	0.000	0.000	0.000	80	546	15534	13563	0.969	Error	Error	10281	5253	0	0	8843	4720	0	0	0	0
1	9	4	""	"YHL042W"	3630	14860	110	6755	6222	3099	85	297	1248	85	81	0	5603	4703	2449	323	553	1288	80	76	0	0	0	0	0	0	0	0	0	0	0	0	0	0	0	0	0	0	0	1.263	1.401	1.418	1.550	1.642	1.361	0.922	0.000	0.000	0.000	0.000	0.000	0.000	0.000	0.000	0.000	0.000	0.000	0.000	0.000	0.000	80	545	11950	10517	0.337	Error	Error	6670	5280	0	0	6137	4380	0	0	0	0
1	10	4	""	"YGR278W"	3820	14860	110	10010	8744	3485	90	258	894	95	93	0	8028	7556	2926	325	546	1054	93	87	0	0	0	0	0	0	0	0	0	0	0	0	0	0	0	0	0	0	0	1.288	1.197	1.203	1.211	1.534	1.212	0.904	0.000	0.000	0.000	0.000	0.000	0.000	0.000	0.000	0.000	0.000	0.000	0.000	0.000	0.000	80	550	17623	15885	0.365	Error	Error	9920	7703	0	0	8654	7231	0	0	0	0
1	11	4	""	"YHL012W"	4010	14860	110	8866	7828	4298	94	339	1186	97	81	0	12888	11241	5376	330	751	2102	97	87	0	0	0	0	0	0	0	0	0	0	0	0	0	0	0	0	0	0	0	0.699	0.709	0.704	0.659	1.672	0.714	0.869	0.000	0.000	0.000	0.000	0.000	0.000	0.000	0.000	0.000	0.000	0.000	0.000	0.000	0.000	80	550	21330	18645	-0.518	Error	Error	8772	12558	0	0	7734	10911	0	0	0	0
1	12	4	""	"YHL044W"	4200	14860	110	7726	6539	3235	88	313	1170	87	81	0	7867	6759	3270	312	733	2214	82	76	0	0	0	0	0	0	0	0	0	0	0	0	0	0	0	0	0	0	0	1.011	1.001	1.015	1.025	1.413	0.978	0.902	0.000	0.000	0.000	0.000	0.000	0.000	0.000	0.000	0.000	0.000	0.000	0.000	0.000	0.000	80	551	15193	12898	0.016	Error	Error	7638	7555	0	0	6451	6447	0	0	0	0
1	13	4	""	"YGR280C"	4390	14870	110	5926	4994	2465	87	228	817	86	83	0	3400	2917	1431	310	512	1152	77	68	0	0	0	0	0	0	0	0	0	0	0	0	0	0	0	0	0	0	0	1.890	1.882	1.912	2.033	1.685	1.825	0.901	0.000	0.000	0.000	0.000	0.000	0.000	0.000	0.000	0.000	0.000	0.000	0.000	0.000	0.000	80	537	8929	7514	0.918	Error	Error	5839	3090	0	0	4907	2607	0	0	0	0
1	14	4	"YLF2"	"YHL014C"	4580	14860	110	7390	6284	2945	90	220	825	90	83	0	24363	21644	10015	311	783	3067	88	83	0	0	0	0	0	0	0	0	0	0	0	0	0	0	0	0	0	0	0	0.304	0.290	0.296	0.286	1.302	0.279	0.902	0.000	0.000	0.000	0.000	0.000	0.000	0.000	0.000	0.000	0.000	0.000	0.000	0.000	0.000	80	536	31352	27527	-1.720	Error	Error	7300	24052	0	0	6194	21333	0	0	0	0
1	15	4	""	"YHL046C"	4770	14860	110	30873	25404	12407	93	240	854	100	96	0	34079	29167	13722	319	973	3711	87	85	0	0	0	0	0	0	0	0	0	0	0	0	0	0	0	0	0	0	0	0.912	0.877	0.892	0.863	1.463	0.866	0.915	0.000	0.000	0.000	0.000	0.000	0.000	0.000	0.000	0.000	0.000	0.000	0.000	0.000	0.000	80	512	64540	54159	-0.133	Error	Error	30780	33760	0	0	25311	28848	0	0	0	0
1	16	4	"BGL2"	"YGR282C"	4950	14860	110	5129	4382	1958	85	244	863	86	81	0	8005	7075	2971	315	798	2744	82	75	0	0	0	0	0	0	0	0	0	0	0	0	0	0	0	0	0	0	0	0.656	0.636	0.655	0.615	1.446	0.542	0.833	0.000	0.000	0.000	0.000	0.000	0.000	0.000	0.000	0.000	0.000	0.000	0.000	0.000	0.000	80	522	12734	11057	-0.608	Error	Error	5044	7690	0	0	4297	6760	0	0	0	0
1	17	4	"dur3"	"YHL016C"	5140	14860	110	8541	7474	3544	85	283	1023	91	82	0	9465	8293	3827	306	696	1709	87	81	0	0	0	0	0	0	0	0	0	0	0	0	0	0	0	0	0	0	0	0.923	0.925	0.967	0.962	1.484	0.901	0.893	0.000	0.000	0.000	0.000	0.000	0.000	0.000	0.000	0.000	0.000	0.000	0.000	0.000	0.000	80	534	17615	15376	-0.115	Error	Error	8456	9159	0	0	7389	7987	0	0	0	0
1	18	4	"COS8"	"YHL048W"	5340	14870	110	18485	15059	9194	80	236	925	87	85	0	17855	14177	9102	307	605	1535	78	71	0	0	0	0	0	0	0	0	0	0	0	0	0	0	0	0	0	0	0	1.049	1.080	1.088	1.250	2.280	1.030	0.915	0.000	0.000	0.000	0.000	0.000	0.000	0.000	0.000	0.000	0.000	0.000	0.000	0.000	0.000	80	539	35953	28849	0.069	Error	Error	18405	17548	0	0	14979	13870	0	0	0	0
1	19	4	"THS1"	"YIL078W"	5530	14860	110	6714	5654	2987	80	170	473	95	91	0	7131	6268	3314	307	507	1134	85	77	0	0	0	0	0	0	0	0	0	0	0	0	0	0	0	0	0	0	0	0.972	0.935	0.972	0.987	1.551	0.905	0.898	0.000	0.000	0.000	0.000	0.000	0.000	0.000	0.000	0.000	0.000	0.000	0.000	0.000	0.000	80	525	13458	11535	-0.041	Error	Error	6634	6824	0	0	5574	5961	0	0	0	0
1	20	4	""	"YIL110W"	5720	14860	110	6609	5435	2502	86	218	669	93	87	0	20357	17622	7266	316	752	2374	98	91	0	0	0	0	0	0	0	0	0	0	0	0	0	0	0	0	0	0	0	0.325	0.309	0.313	0.288	1.447	0.306	0.900	0.000	0.000	0.000	0.000	0.000	0.000	0.000	0.000	0.000	0.000	0.000	0.000	0.000	0.000	80	525	26564	22655	-1.619	Error	Error	6523	20041	0	0	5349	17306	0	0	0	0
1	21	4	"CCT2"	"YIL142W"	5910	14860	110	5052	4706	1854	86	203	624	98	93	0	3027	2987	1219	313	691	2245	68	3	0	0	0	0	0	0	0	0	0	0	0	0	0	0	0	0	0	0	0	1.830	1.728	1.816	1.814	1.368	1.596	0.889	0.000	0.000	0.000	0.000	0.000	0.000	0.000	0.000	0.000	0.000	0.000	0.000	0.000	0.000	80	521	7680	7294	0.872	Error	Error	4966	2714	0	0	4620	2674	0	0	0	0
1	22	4	""	"YIL080W"	6110	14870	120	14185	11711	5360	91	163	477	99	97	0	11895	9701	4871	317	456	936	93	85	0	0	0	0	0	0	0	0	0	0	0	0	0	0	0	0	0	0	0	1.217	1.238	1.259	1.407	1.707	1.183	0.925	0.000	0.000	0.000	0.000	0.000	0.000	0.000	0.000	0.000	0.000	0.000	0.000	0.000	0.000	120	612	25672	21004	0.284	Error	Error	14094	11578	0	0	11620	9384	0	0	0	0
1	1	5	""	"YIL112W"	2110	15060	110	8730	8091	4447	77	195	834	95	85	0	5637	5248	2619	310	437	791	88	82	0	0	0	0	0	0	0	0	0	0	0	0	0	0	0	0	0	0	0	1.624	1.623	1.601	1.598	1.405	1.638	0.866	0.000	0.000	0.000	0.000	0.000	0.000	0.000	0.000	0.000	0.000	0.000	0.000	0.000	0.000	80	550	13980	12952	0.700	Error	Error	8653	5327	0	0	8014	4938	0	0	0	0
1	2	5	"TID3"	"YIL144W"	2300	15050	110	9454	8552	4250	83	459	1745	86	77	0	10258	9114	4466	326	769	1924	85	78	0	0	0	0	0	0	0	0	0	0	0	0	0	0	0	0	0	0	0	0.944	0.964	0.965	1.002	1.458	0.974	0.900	0.000	0.000	0.000	0.000	0.000	0.000	0.000	0.000	0.000	0.000	0.000	0.000	0.000	0.000	80	542	19303	17257	-0.084	Error	Error	9371	9932	0	0	8469	8788	0	0	0	0
1	3	5	""	"YIL082W-A"	2500	15060	110	2909	2460	1232	81	342	1532	73	37	0	3072	2667	1377	322	638	1668	72	22	0	0	0	0	0	0	0	0	0	0	0	0	0	0	0	0	0	0	0	1.028	1.014	1.013	1.050	1.683	1.008	0.891	0.000	0.000	0.000	0.000	0.000	0.000	0.000	0.000	0.000	0.000	0.000	0.000	0.000	0.000	80	515	5578	4724	0.040	Error	Error	2828	2750	0	0	2379	2345	0	0	0	0
1	4	5	"POR2"	"YIL114C"	2680	15050	110	6426	5191	2561	79	170	564	91	83	0	2688	2309	1079	293	378	400	86	76	0	0	0	0	0	0	0	0	0	0	0	0	0	0	0	0	0	0	0	2.650	2.536	2.506	2.506	1.320	2.584	0.870	0.000	0.000	0.000	0.000	0.000	0.000	0.000	0.000	0.000	0.000	0.000	0.000	0.000	0.000	80	483	8742	7128	1.406	Error	Error	6347	2395	0	0	5112	2016	0	0	0	0
1	5	5	"ECM37"	"YIL146C"	2880	15070	110	639	685	384	73	149	530	56	13	0	770	727	411	279	343	397	56	22	0	0	0	0	0	0	0	0	0	0	0	0	0	0	0	0	0	0	0	1.153	1.366	1.303	1.447	2.051	0.836	0.423	0.000	0.000	0.000	0.000	0.000	0.000	0.000	0.000	0.000	0.000	0.000	0.000	0.000	0.000	80	534	1057	1060	0.205	Error	Error	566	491	0	0	612	448	0	0	0	0
1	6	5	"SDS3"	"YIL084C"	3080	15060	120	10393	9096	4475	83	120	289	98	97	0	3942	3569	1714	285	384	1103	84	74	0	0	0	0	0	0	0	0	0	0	0	0	0	0	0	0	0	0	0	2.819	2.745	2.765	2.929	1.663	2.773	0.911	0.000	0.000	0.000	0.000	0.000	0.000	0.000	0.000	0.000	0.000	0.000	0.000	0.000	0.000	120	563	13967	12297	1.495	Error	Error	10310	3657	0	0	9013	3284	0	0	0	0
1	7	5	"his5"	"YIL116W"	3240	15060	110	7762	6546	2922	83	353	1307	88	85	0	8479	7644	3351	283	669	1796	90	80	0	0	0	0	0	0	0	0	0	0	0	0	0	0	0	0	0	0	0	0.937	0.878	0.871	0.868	1.457	0.868	0.902	0.000	0.000	0.000	0.000	0.000	0.000	0.000	0.000	0.000	0.000	0.000	0.000	0.000	0.000	80	485	15875	13824	-0.094	Error	Error	7679	8196	0	0	6463	7361	0	0	0	0
1	8	5	"RPL40A"	"YIL148W"	3430	15060	110	7754	6960	3268	82	488	1630	87	78	0	9080	8332	3809	314	913	2231	86	80	0	0	0	0	0	0	0	0	0	0	0	0	0	0	0	0	0	0	0	0.875	0.858	0.872	0.864	1.428	0.852	0.899	0.000	0.000	0.000	0.000	0.000	0.000	0.000	0.000	0.000	0.000	0.000	0.000	0.000	0.000	80	524	16438	14896	-0.192	Error	Error	7672	8766	0	0	6878	8018	0	0	0	0
1	9	5	"ilv3"	"YJR016C"	3630	15060	120	3763	3584	1488	80	275	1113	89	80	0	8814	8155	3548	322	660	1697	90	85	0	0	0	0	0	0	0	0	0	0	0	0	0	0	0	0	0	0	0	0.434	0.447	0.456	0.500	1.934	0.427	0.907	0.000	0.000	0.000	0.000	0.000	0.000	0.000	0.000	0.000	0.000	0.000	0.000	0.000	0.000	120	570	12175	11337	-1.205	Error	Error	3683	8492	0	0	3504	7833	0	0	0	0
1	10	5	"cyc1"	"YJR048W"	3800	15060	100	2435	2094	912	83	153	370	88	83	0	2509	2310	999	311	403	446	85	83	0	0	0	0	0	0	0	0	0	0	0	0	0	0	0	0	0	0	0	1.070	1.006	1.034	1.089	1.540	0.993	0.887	0.000	0.000	0.000	0.000	0.000	0.000	0.000	0.000	0.000	0.000	0.000	0.000	0.000	0.000	80	430	4550	4010	0.098	Error	Error	2352	2198	0	0	2011	1999	0	0	0	0
1	11	5	""	"YJR080C"	3990	15060	110	6073	5825	2613	91	348	1091	92	83	0	5649	5506	2401	325	653	1280	90	80	0	0	0	0	0	0	0	0	0	0	0	0	0	0	0	0	0	0	0	1.124	1.107	1.150	1.109	1.330	1.072	0.919	0.000	0.000	0.000	0.000	0.000	0.000	0.000	0.000	0.000	0.000	0.000	0.000	0.000	0.000	80	516	11306	10915	0.168	Error	Error	5982	5324	0	0	5734	5181	0	0	0	0
1	12	5	""	"YJR018W"	4170	15060	110	2487	2174	939	93	358	1101	78	62	0	2129	1916	928	320	613	1217	70	13	0	0	0	0	0	0	0	0	0	0	0	0	0	0	0	0	0	0	0	1.323	1.304	1.283	1.402	2.000	1.024	0.836	0.000	0.000	0.000	0.000	0.000	0.000	0.000	0.000	0.000	0.000	0.000	0.000	0.000	0.000	80	526	4203	3677	0.404	Error	Error	2394	1809	0	0	2081	1596	0	0	0	0
1	13	5	"ISY1"	"YJR050W"	4370	15050	110	4706	4126	2186	86	236	638	83	77	0	2478	2215	1158	322	443	496	77	75	0	0	0	0	0	0	0	0	0	0	0	0	0	0	0	0	0	0	0	2.143	2.134	2.047	2.113	1.678	2.098	0.875	0.000	0.000	0.000	0.000	0.000	0.000	0.000	0.000	0.000	0.000	0.000	0.000	0.000	0.000	80	510	6776	5933	1.100	Error	Error	4620	2156	0	0	4040	1893	0	0	0	0
1	14	5	""	"YJR083C"	4560	15060	120	7821	6653	3198	82	167	531	93	90	0	3609	3147	1596	301	428	1326	75	65	0	0	0	0	0	0	0	0	0	0	0	0	0	0	0	0	0	0	0	2.339	2.309	2.284	2.486	1.705	2.234	0.888	0.000	0.000	0.000	0.000	0.000	0.000	0.000	0.000	0.000	0.000	0.000	0.000	0.000	0.000	120	578	11047	9417	1.226	Error	Error	7739	3308	0	0	6571	2846	0	0	0	0
1	15	5	""	"YJR020W"	4760	15060	120	3552	2904	1298	79	107	315	93	85	0	2386	2100	948	282	363	1276	74	23	0	0	0	0	0	0	0	0	0	0	0	0	0	0	0	0	0	0	0	1.651	1.554	1.537	1.575	1.654	1.523	0.894	0.000	0.000	0.000	0.000	0.000	0.000	0.000	0.000	0.000	0.000	0.000	0.000	0.000	0.000	120	543	5577	4643	0.723	Error	Error	3473	2104	0	0	2825	1818	0	0	0	0
1	16	5	"rad7"	"YJR052W"	4940	15060	120	4950	4683	2169	72	88	192	99	96	0	2829	2586	1189	277	324	544	90	79	0	0	0	0	0	0	0	0	0	0	0	0	0	0	0	0	0	0	0	1.911	1.997	2.004	2.186	1.758	1.985	0.878	0.000	0.000	0.000	0.000	0.000	0.000	0.000	0.000	0.000	0.000	0.000	0.000	0.000	0.000	120	525	7430	6920	0.935	Error	Error	4878	2552	0	0	4611	2309	0	0	0	0
1	17	5	""	"YJR085C"	5130	15060	120	2838	2382	1118	73	101	357	89	83	0	2183	1901	915	268	313	557	78	73	0	0	0	0	0	0	0	0	0	0	0	0	0	0	0	0	0	0	0	1.444	1.414	1.395	1.483	1.435	1.365	0.877	0.000	0.000	0.000	0.000	0.000	0.000	0.000	0.000	0.000	0.000	0.000	0.000	0.000	0.000	120	549	4680	3942	0.530	Error	Error	2765	1915	0	0	2309	1633	0	0	0	0
1	18	5	"LSM8"	"YJR022W"	5310	15050	110	2341	1982	909	78	124	290	90	85	0	1587	1409	619	288	329	262	86	77	0	0	0	0	0	0	0	0	0	0	0	0	0	0	0	0	0	0	0	1.742	1.698	1.671	1.737	1.497	1.613	0.878	0.000	0.000	0.000	0.000	0.000	0.000	0.000	0.000	0.000	0.000	0.000	0.000	0.000	0.000	80	483	3562	3025	0.801	Error	Error	2263	1299	0	0	1904	1121	0	0	0	0
1	19	5	""	"YJR054W"	5510	15060	120	7571	6747	2985	78	135	354	97	97	0	5819	5038	2192	296	365	552	92	90	0	0	0	0	0	0	0	0	0	0	0	0	0	0	0	0	0	0	0	1.357	1.406	1.395	1.484	1.637	1.436	0.906	0.000	0.000	0.000	0.000	0.000	0.000	0.000	0.000	0.000	0.000	0.000	0.000	0.000	0.000	120	589	13016	11411	0.440	Error	Error	7493	5523	0	0	6669	4742	0	0	0	0
1	20	5	""	"YJR087W"	5700	15060	120	2746	2343	1050	82	112	315	93	85	0	1781	1601	694	300	403	1257	62	0	0	0	0	0	0	0	0	0	0	0	0	0	0	0	0	0	0	0	0	1.799	1.738	1.762	1.782	1.396	1.726	0.892	0.000	0.000	0.000	0.000	0.000	0.000	0.000	0.000	0.000	0.000	0.000	0.000	0.000	0.000	120	541	4145	3562	0.847	Error	Error	2664	1481	0	0	2261	1301	0	0	0	0
1	21	5	"RSC4"	"YKR008W"	5890	15060	120	5640	5150	2476	85	106	270	98	93	0	17664	15801	7699	303	328	249	97	97	0	0	0	0	0	0	0	0	0	0	0	0	0	0	0	0	0	0	0	0.320	0.327	0.326	0.345	1.777	0.317	0.921	0.000	0.000	0.000	0.000	0.000	0.000	0.000	0.000	0.000	0.000	0.000	0.000	0.000	0.000	120	535	22916	20563	-1.644	Error	Error	5555	17361	0	0	5065	15498	0	0	0	0
1	22	5	"gap1"	"YKR039W"	6080	15060	120	5750	5236	2097	81	86	34	100	100	0	3211	2987	1060	298	311	97	98	96	0	0	0	0	0	0	0	0	0	0	0	0	0	0	0	0	0	0	0	1.946	1.917	1.923	1.929	1.435	1.998	0.914	0.000	0.000	0.000	0.000	0.000	0.000	0.000	0.000	0.000	0.000	0.000	0.000	0.000	0.000	120	589	8582	7844	0.961	Error	Error	5669	2913	0	0	5155	2689	0	0	0	0
1	1	6	""	"YKR071C"	2080	15240	110	10150	8879	4179	70	233	1143	93	85	0	21392	19699	8753	306	816	3113	96	87	0	0	0	0	0	0	0	0	0	0	0	0	0	0	0	0	0	0	0	0.478	0.454	0.450	0.427	1.399	0.447	0.914	0.000	0.000	0.000	0.000	0.000	0.000	0.000	0.000	0.000	0.000	0.000	0.000	0.000	0.000	80	538	31166	28202	-1.065	Error	Error	10080	21086	0	0	8809	19393	0	0	0	0
1	2	6	"TOF2"	"YKR010C"	2260	15240	110	9440	9086	4251	78	442	1660	96	85	0	11984	11821	4409	320	1182	3632	95	81	0	0	0	0	0	0	0	0	0	0	0	0	0	0	0	0	0	0	0	0.803	0.783	0.778	0.728	1.380	0.729	0.820	0.000	0.000	0.000	0.000	0.000	0.000	0.000	0.000	0.000	0.000	0.000	0.000	0.000	0.000	80	520	21026	20509	-0.317	Error	Error	9362	11664	0	0	9008	11501	0	0	0	0
1	3	6	""	"YKR041W"	2450	15240	110	3900	3332	1519	83	375	1269	80	76	0	2292	2128	926	315	715	1847	55	0	0	0	0	0	0	0	0	0	0	0	0	0	0	0	0	0	0	0	0	1.931	1.792	1.783	2.004	1.871	1.598	0.664	0.000	0.000	0.000	0.000	0.000	0.000	0.000	0.000	0.000	0.000	0.000	0.000	0.000	0.000	80	508	5794	5062	0.949	Error	Error	3817	1977	0	0	3249	1813	0	0	0	0
1	4	6	""	"YKR073C"	2650	15230	150	158	204	165	79	221	692	1	0	0	359	434	263	304	421	521	9	0	0	0	0	0	0	0	0	0	0	0	0	0	0	0	0	0	0	0	0	1.436	0.962	0.589	0.556	2.893	1.410	0.831	0.000	0.000	0.000	0.000	0.000	0.000	0.000	0.000	0.000	0.000	0.000	0.000	0.000	0.000	156	724	134	255	0.522	Error	Error	79	55	0	0	125	130	0	0	-50	0
1	5	6	""	"YKR012C"	2830	15240	110	4686	3898	1799	74	139	448	90	86	0	3377	2865	1285	293	378	496	86	80	0	0	0	0	0	0	0	0	0	0	0	0	0	0	0	0	0	0	0	1.495	1.487	1.464	1.554	1.538	1.450	0.866	0.000	0.000	0.000	0.000	0.000	0.000	0.000	0.000	0.000	0.000	0.000	0.000	0.000	0.000	80	465	7696	6396	0.581	Error	Error	4612	3084	0	0	3824	2572	0	0	0	0
1	6	6	""	"YKR043C"	3020	15240	110	10786	8944	4130	84	226	738	97	91	0	26648	22969	10013	284	741	2848	96	88	0	0	0	0	0	0	0	0	0	0	0	0	0	0	0	0	0	0	0	0.406	0.391	0.390	0.366	1.417	0.383	0.928	0.000	0.000	0.000	0.000	0.000	0.000	0.000	0.000	0.000	0.000	0.000	0.000	0.000	0.000	80	468	37066	31545	-1.301	Error	Error	10702	26364	0	0	8860	22685	0	0	0	0
1	7	6	""	"YKR075C"	3220	15250	110	6379	5418	2904	81	178	624	92	83	0	4757	4231	2288	286	652	2698	71	31	0	0	0	0	0	0	0	0	0	0	0	0	0	0	0	0	0	0	0	1.409	1.353	1.383	1.461	1.606	1.314	0.910	0.000	0.000	0.000	0.000	0.000	0.000	0.000	0.000	0.000	0.000	0.000	0.000	0.000	0.000	80	513	10769	9282	0.494	Error	Error	6298	4471	0	0	5337	3945	0	0	0	0
1	8	6	"YPT52"	"YKR014C"	3400	15240	110	7629	6568	3032	83	288	1134	86	83	0	4516	4178	1864	305	485	934	87	82	0	0	0	0	0	0	0	0	0	0	0	0	0	0	0	0	0	0	0	1.792	1.674	1.701	1.693	1.432	1.688	0.919	0.000	0.000	0.000	0.000	0.000	0.000	0.000	0.000	0.000	0.000	0.000	0.000	0.000	0.000	80	508	11757	10358	0.842	Error	Error	7546	4211	0	0	6485	3873	0	0	0	0
1	9	6	""	"YKR045C"	3590	15240	110	7783	6674	3140	84	396	1362	86	80	0	13231	11609	5348	334	805	2034	87	82	0	0	0	0	0	0	0	0	0	0	0	0	0	0	0	0	0	0	0	0.597	0.584	0.589	0.578	1.434	0.571	0.926	0.000	0.000	0.000	0.000	0.000	0.000	0.000	0.000	0.000	0.000	0.000	0.000	0.000	0.000	80	512	20596	17865	-0.744	Error	Error	7699	12897	0	0	6590	11275	0	0	0	0
1	10	6	""	"YKR077W"	3790	15240	110	11267	10924	5247	84	339	1290	97	88	0	6314	6180	2649	320	738	1979	87	78	0	0	0	0	0	0	0	0	0	0	0	0	0	0	0	0	0	0	0	1.866	1.850	1.884	1.852	1.552	1.928	0.900	0.000	0.000	0.000	0.000	0.000	0.000	0.000	0.000	0.000	0.000	0.000	0.000	0.000	0.000	80	530	17177	16700	0.900	Error	Error	11183	5994	0	0	10840	5860	0	0	0	0
1	11	6	"FRE1"	"YLR214W"	3970	15240	110	9340	8150	3808	86	386	1483	86	83	0	9091	8294	3594	322	688	1615	90	87	0	0	0	0	0	0	0	0	0	0	0	0	0	0	0	0	0	0	0	1.055	1.012	1.015	0.978	1.443	1.021	0.898	0.000	0.000	0.000	0.000	0.000	0.000	0.000	0.000	0.000	0.000	0.000	0.000	0.000	0.000	80	505	18023	16036	0.078	Error	Error	9254	8769	0	0	8064	7972	0	0	0	0
1	12	6	"MAP1"	"YLR244C"	4160	15240	110	7161	5830	2982	97	356	1286	85	77	0	13676	11528	5684	328	872	2358	83	80	0	0	0	0	0	0	0	0	0	0	0	0	0	0	0	0	0	0	0	0.529	0.512	0.512	0.492	1.517	0.491	0.904	0.000	0.000	0.000	0.000	0.000	0.000	0.000	0.000	0.000	0.000	0.000	0.000	0.000	0.000	80	516	20412	16933	-0.918	Error	Error	7064	13348	0	0	5733	11200	0	0	0	0
1	13	6	"CDC46"	"YLR274W"	4350	15240	110	5680	5759	3671	95	263	901	92	83	0	6845	6293	3189	322	755	2147	81	70	0	0	0	0	0	0	0	0	0	0	0	0	0	0	0	0	0	0	0	0.856	0.949	0.916	0.921	1.420	0.966	0.850	0.000	0.000	0.000	0.000	0.000	0.000	0.000	0.000	0.000	0.000	0.000	0.000	0.000	0.000	80	540	12108	11635	-0.224	Error	Error	5585	6523	0	0	5664	5971	0	0	0	0
1	14	6	"CPR6"	"YLR216C"	4540	15240	110	8373	7366	3261	80	279	1062	93	85	0	4473	4072	1588	302	530	1157	90	80	0	0	0	0	0	0	0	0	0	0	0	0	0	0	0	0	0	0	0	1.988	1.933	1.923	1.872	1.507	1.978	0.906	0.000	0.000	0.000	0.000	0.000	0.000	0.000	0.000	0.000	0.000	0.000	0.000	0.000	0.000	80	498	12464	11056	0.992	Error	Error	8293	4171	0	0	7286	3770	0	0	0	0
1	15	6	"ERF2"	"YLR246W"	4730	15240	110	2860	2539	1461	79	243	959	80	63	0	3764	3319	1905	280	451	807	78	72	0	0	0	0	0	0	0	0	0	0	0	0	0	0	0	0	0	0	0	0.798	0.809	0.789	0.821	1.683	0.786	0.863	0.000	0.000	0.000	0.000	0.000	0.000	0.000	0.000	0.000	0.000	0.000	0.000	0.000	0.000	80	510	6265	5499	-0.325	Error	Error	2781	3484	0	0	2460	3039	0	0	0	0
1	16	6	"DBP9"	"YLR276C"	4930	15240	110	7558	6871	3710	72	144	437	95	88	0	27178	24427	13534	270	653	2669	90	83	0	0	0	0	0	0	0	0	0	0	0	0	0	0	0	0	0	0	0	0.278	0.281	0.280	0.277	1.492	0.260	0.904	0.000	0.000	0.000	0.000	0.000	0.000	0.000	0.000	0.000	0.000	0.000	0.000	0.000	0.000	80	493	34394	30956	-1.846	Error	Error	7486	26908	0	0	6799	24157	0	0	0	0
1	17	6	""	"YLR218C"	5110	15240	110	3903	3217	1614	73	120	348	87	85	0	2366	2043	1035	268	599	2601	17	0	0	0	0	0	0	0	0	0	0	0	0	0	0	0	0	0	0	0	0	1.826	1.771	1.766	1.847	1.712	0.737	0.255	0.000	0.000	0.000	0.000	0.000	0.000	0.000	0.000	0.000	0.000	0.000	0.000	0.000	0.000	80	508	5928	4919	0.868	Error	Error	3830	2098	0	0	3144	1775	0	0	0	0
1	18	6	"RCK2"	"YLR248W"	5310	15240	110	6893	6690	3085	79	213	790	97	90	0	2421	2257	946	284	386	613	87	81	0	0	0	0	0	0	0	0	0	0	0	0	0	0	0	0	0	0	0	3.189	3.351	3.408	3.414	1.442	3.431	0.881	0.000	0.000	0.000	0.000	0.000	0.000	0.000	0.000	0.000	0.000	0.000	0.000	0.000	0.000	80	572	8951	8584	1.673	Error	Error	6814	2137	0	0	6611	1973	0	0	0	0
1	19	6	""	"YLR278C"	5510	15250	110	667	718	501	80	187	781	32	3	0	743	747	475	291	345	325	66	27	0	0	0	0	0	0	0	0	0	0	0	0	0	0	0	0	0	0	0	1.299	1.399	1.278	1.115	2.309	1.209	0.715	0.000	0.000	0.000	0.000	0.000	0.000	0.000	0.000	0.000	0.000	0.000	0.000	0.000	0.000	80	520	1039	1094	0.377	Error	Error	587	452	0	0	638	456	0	0	0	0
1	20	6	"CCC1"	"YLR220W"	5700	15240	110	4865	4172	2147	82	103	160	98	92	0	9242	8323	4036	296	401	783	95	87	0	0	0	0	0	0	0	0	0	0	0	0	0	0	0	0	0	0	0	0.535	0.510	0.506	0.479	1.508	0.493	0.910	0.000	0.000	0.000	0.000	0.000	0.000	0.000	0.000	0.000	0.000	0.000	0.000	0.000	0.000	80	490	13729	12117	-0.903	Error	Error	4783	8946	0	0	4090	8027	0	0	0	0
1	21	6	"SSP120"	"YLR250W"	5890	15250	120	3771	3214	1481	80	98	150	94	90	0	3351	2995	1492	292	385	731	80	78	0	0	0	0	0	0	0	0	0	0	0	0	0	0	0	0	0	0	0	1.207	1.159	1.156	1.312	1.867	1.028	0.815	0.000	0.000	0.000	0.000	0.000	0.000	0.000	0.000	0.000	0.000	0.000	0.000	0.000	0.000	120	564	6750	5837	0.271	Error	Error	3691	3059	0	0	3134	2703	0	0	0	0
1	22	6	""	"YLR280C"	6080	15240	110	549	503	276	77	81	37	87	82	0	722	705	375	292	299	87	77	75	0	0	0	0	0	0	0	0	0	0	0	0	0	0	0	0	0	0	0	1.098	1.031	0.905	0.792	2.710	0.849	0.743	0.000	0.000	0.000	0.000	0.000	0.000	0.000	0.000	0.000	0.000	0.000	0.000	0.000	0.000	80	522	902	839	0.134	Error	Error	472	430	0	0	426	413	0	0	0	0
1	1	7	"CTK3"	"YML112W"	2090	15430	110	15416	12637	6434	70	295	1534	86	81	0	5501	4739	2182	305	546	1867	77	75	0	0	0	0	0	0	0	0	0	0	0	0	0	0	0	0	0	0	0	2.953	2.834	2.853	2.654	1.453	2.999	0.914	0.000	0.000	0.000	0.000	0.000	0.000	0.000	0.000	0.000	0.000	0.000	0.000	0.000	0.000	80	558	20542	17001	1.562	Error	Error	15346	5196	0	0	12567	4434	0	0	0	0
1	2	7	""	"YMR010W"	2280	15430	110	10565	8861	4403	76	475	1929	82	77	0	6352	5397	2475	301	631	1521	80	78	0	0	0	0	0	0	0	0	0	0	0	0	0	0	0	0	0	0	0	1.733	1.724	1.696	1.669	1.495	1.753	0.923	0.000	0.000	0.000	0.000	0.000	0.000	0.000	0.000	0.000	0.000	0.000	0.000	0.000	0.000	80	535	16540	13881	0.794	Error	Error	10489	6051	0	0	8785	5096	0	0	0	0
1	3	7	""	"YMR041C"	2480	15430	110	9427	7933	4264	82	364	1433	83	78	0	4672	3999	2062	294	522	1039	78	73	0	0	0	0	0	0	0	0	0	0	0	0	0	0	0	0	0	0	0	2.135	2.119	2.130	2.283	1.704	2.194	0.909	0.000	0.000	0.000	0.000	0.000	0.000	0.000	0.000	0.000	0.000	0.000	0.000	0.000	0.000	80	540	13723	11556	1.094	Error	Error	9345	4378	0	0	7851	3705	0	0	0	0
1	4	7	""	"YML114C"	2670	15430	110	10266	8527	4092	80	235	941	92	85	0	4658	4264	1904	298	434	742	88	81	0	0	0	0	0	0	0	0	0	0	0	0	0	0	0	0	0	0	0	2.336	2.130	2.166	2.211	1.621	2.171	0.906	0.000	0.000	0.000	0.000	0.000	0.000	0.000	0.000	0.000	0.000	0.000	0.000	0.000	0.000	80	512	14546	12413	1.224	Error	Error	10186	4360	0	0	8447	3966	0	0	0	0
1	5	7	"CLU1"	"YMR012W"	2860	15430	110	522	482	226	77	165	576	21	0	0	796	733	357	299	396	540	40	3	0	0	0	0	0	0	0	0	0	0	0	0	0	0	0	0	0	0	0	0.895	0.933	0.826	0.726	2.413	0.783	0.687	0.000	0.000	0.000	0.000	0.000	0.000	0.000	0.000	0.000	0.000	0.000	0.000	0.000	0.000	80	466	942	839	-0.159	Error	Error	445	497	0	0	405	434	0	0	0	0
1	6	7	"mcm1"	"YMR043W"	3030	15420	150	97	125	90	77	167	582	0	0	0	302	339	180	293	635	2497	0	0	0	0	0	0	0	0	0	0	0	0	0	0	0	0	0	0	0	0	0	2.222	1.043	0.388	0.437	3.429	0.200	0.908	0.000	0.000	0.000	0.000	0.000	0.000	0.000	0.000	0.000	0.000	0.000	0.000	0.000	0.000	156	737	29	94	1.152	Error	Error	20	9	0	0	48	46	0	0	-50	0
1	7	7	"atr1"	"YML116W"	3240	15430	110	8179	6974	3244	78	136	457	100	91	0	15582	13839	6241	301	506	1548	95	85	0	0	0	0	0	0	0	0	0	0	0	0	0	0	0	0	0	0	0	0.530	0.509	0.521	0.506	1.404	0.496	0.917	0.000	0.000	0.000	0.000	0.000	0.000	0.000	0.000	0.000	0.000	0.000	0.000	0.000	0.000	80	523	23382	20434	-0.916	Error	Error	8101	15281	0	0	6896	13538	0	0	0	0
1	8	7	""	"YMR014W"	3430	15430	110	5776	5038	2364	82	230	809	93	87	0	11763	11624	5431	321	724	2054	92	86	0	0	0	0	0	0	0	0	0	0	0	0	0	0	0	0	0	0	0	0.498	0.438	0.460	0.433	1.393	0.416	0.877	0.000	0.000	0.000	0.000	0.000	0.000	0.000	0.000	0.000	0.000	0.000	0.000	0.000	0.000	80	522	17136	16259	-1.007	Error	Error	5694	11442	0	0	4956	11303	0	0	0	0
1	9	7	""	"YMR045C"	3630	15440	120	20548	18986	9880	81	266	850	97	92	0	25396	22610	12011	317	680	1847	93	86	0	0	0	0	0	0	0	0	0	0	0	0	0	0	0	0	0	0	0	0.816	0.848	0.859	0.920	2.007	0.833	0.903	0.000	0.000	0.000	0.000	0.000	0.000	0.000	0.000	0.000	0.000	0.000	0.000	0.000	0.000	120	619	45546	41198	-0.293	Error	Error	20467	25079	0	0	18905	22293	0	0	0	0
1	10	7	""	"YML117W-A"	3840	15440	110	4557	3573	2176	83	253	900	77	70	0	5621	4587	2807	306	450	847	76	75	0	0	0	0	0	0	0	0	0	0	0	0	0	0	0	0	0	0	0	0.842	0.815	0.834	1.031	2.526	0.792	0.908	0.000	0.000	0.000	0.000	0.000	0.000	0.000	0.000	0.000	0.000	0.000	0.000	0.000	0.000	80	516	9789	7771	-0.249	Error	Error	4474	5315	0	0	3490	4281	0	0	0	0
1	11	7	"SOK2"	"YMR016C"	4010	15440	120	10022	9295	3951	83	151	686	97	96	0	5695	5312	2217	305	391	847	94	87	0	0	0	0	0	0	0	0	0	0	0	0	0	0	0	0	0	0	0	1.844	1.840	1.858	1.833	1.416	1.894	0.906	0.000	0.000	0.000	0.000	0.000	0.000	0.000	0.000	0.000	0.000	0.000	0.000	0.000	0.000	120	551	15329	14219	0.883	Error	Error	9939	5390	0	0	9212	5007	0	0	0	0
1	12	7	""	"YMR046W-A"	4200	15440	120	20845	16195	8310	87	161	619	94	91	0	24287	19046	10246	316	519	1671	85	83	0	0	0	0	0	0	0	0	0	0	0	0	0	0	0	0	0	0	0	0.866	0.860	0.862	0.964	1.941	0.834	0.909	0.000	0.000	0.000	0.000	0.000	0.000	0.000	0.000	0.000	0.000	0.000	0.000	0.000	0.000	120	566	44729	34838	-0.208	Error	Error	20758	23971	0	0	16108	18730	0	0	0	0
1	13	7	"PUB1"	"YNL016W"	4380	15440	110	1297	1166	637	81	113	178	83	78	0	1299	1225	691	307	357	351	75	68	0	0	0	0	0	0	0	0	0	0	0	0	0	0	0	0	0	0	0	1.226	1.182	1.117	1.082	2.121	1.037	0.839	0.000	0.000	0.000	0.000	0.000	0.000	0.000	0.000	0.000	0.000	0.000	0.000	0.000	0.000	80	492	2208	2003	0.294	Error	Error	1216	992	0	0	1085	918	0	0	0	0
1	14	7	"ALG11"	"YNL048W"	4580	15440	120	8767	8028	3677	75	155	636	98	95	0	8989	8220	4055	283	360	515	95	92	0	0	0	0	0	0	0	0	0	0	0	0	0	0	0	0	0	0	0	0.998	1.002	1.019	1.092	1.808	0.958	0.862	0.000	0.000	0.000	0.000	0.000	0.000	0.000	0.000	0.000	0.000	0.000	0.000	0.000	0.000	120	594	17398	15890	-0.002	Error	Error	8692	8706	0	0	7953	7937	0	0	0	0
1	15	7	"TPM1"	"YNL079C"	4770	15440	120	3769	3338	1761	73	94	189	94	88	0	2259	1942	1139	269	306	316	78	71	0	0	0	0	0	0	0	0	0	0	0	0	0	0	0	0	0	0	0	1.857	1.952	1.945	2.262	2.070	1.815	0.861	0.000	0.000	0.000	0.000	0.000	0.000	0.000	0.000	0.000	0.000	0.000	0.000	0.000	0.000	120	585	5686	4938	0.893	Error	Error	3696	1990	0	0	3265	1673	0	0	0	0
1	16	7	""	"YNL018C"	4960	15440	120	10391	9581	4600	72	97	277	99	97	0	5901	5493	2709	268	443	2072	84	65	0	0	0	0	0	0	0	0	0	0	0	0	0	0	0	0	0	0	0	1.832	1.820	1.830	1.903	1.600	1.804	0.899	0.000	0.000	0.000	0.000	0.000	0.000	0.000	0.000	0.000	0.000	0.000	0.000	0.000	0.000	120	543	15952	14734	0.873	Error	Error	10319	5633	0	0	9509	5225	0	0	0	0
1	17	7	""	"YNL050C"	5140	15440	110	3722	3245	1639	74	172	523	88	80	0	10695	9569	4862	279	580	1658	88	78	0	0	0	0	0	0	0	0	0	0	0	0	0	0	0	0	0	0	0	0.350	0.341	0.341	0.341	1.489	0.316	0.890	0.000	0.000	0.000	0.000	0.000	0.000	0.000	0.000	0.000	0.000	0.000	0.000	0.000	0.000	80	534	14064	12461	-1.514	Error	Error	3648	10416	0	0	3171	9290	0	0	0	0
1	18	7	""	"YNL081C"	5360	15450	110	2901	2270	1267	82	182	490	82	73	0	11704	9338	5388	292	615	1714	81	75	0	0	0	0	0	0	0	0	0	0	0	0	0	0	0	0	0	0	0	0.247	0.242	0.247	0.282	2.212	0.229	0.908	0.000	0.000	0.000	0.000	0.000	0.000	0.000	0.000	0.000	0.000	0.000	0.000	0.000	0.000	80	511	14231	11234	-2.017	Error	Error	2819	11412	0	0	2188	9046	0	0	0	0
1	19	7	"ARK1"	"YNL020C"	5520	15440	110	6618	5529	2750	80	203	760	91	81	0	7390	6296	3028	302	489	985	86	80	0	0	0	0	0	0	0	0	0	0	0	0	0	0	0	0	0	0	0	0.922	0.909	0.912	0.947	1.493	0.905	0.887	0.000	0.000	0.000	0.000	0.000	0.000	0.000	0.000	0.000	0.000	0.000	0.000	0.000	0.000	80	487	13626	11443	-0.117	Error	Error	6538	7088	0	0	5449	5994	0	0	0	0
1	20	7	"COX5A"	"YNL052W"	5720	15440	110	2407	2155	1171	80	201	734	77	72	0	2903	2683	1493	294	507	1032	78	61	0	0	0	0	0	0	0	0	0	0	0	0	0	0	0	0	0	0	0	0.892	0.869	0.840	0.916	1.849	0.797	0.882	0.000	0.000	0.000	0.000	0.000	0.000	0.000	0.000	0.000	0.000	0.000	0.000	0.000	0.000	80	532	4936	4464	-0.165	Error	Error	2327	2609	0	0	2075	2389	0	0	0	0
1	21	7	""	"YNL083W"	5910	15440	110	6693	5749	3082	80	143	423	96	86	0	4422	3952	1966	297	394	562	88	80	0	0	0	0	0	0	0	0	0	0	0	0	0	0	0	0	0	0	0	1.603	1.551	1.514	1.592	1.737	1.554	0.902	0.000	0.000	0.000	0.000	0.000	0.000	0.000	0.000	0.000	0.000	0.000	0.000	0.000	0.000	80	495	10738	9324	0.681	Error	Error	6613	4125	0	0	5669	3655	0	0	0	0
1	22	7	""	"YNL022C"	6100	15440	110	6776	5914	3047	80	172	558	91	85	0	2789	2441	1147	293	384	551	81	77	0	0	0	0	0	0	0	0	0	0	0	0	0	0	0	0	0	0	0	2.683	2.716	2.907	2.887	1.572	2.743	0.914	0.000	0.000	0.000	0.000	0.000	0.000	0.000	0.000	0.000	0.000	0.000	0.000	0.000	0.000	80	546	9192	7982	1.424	Error	Error	6696	2496	0	0	5834	2148	0	0	0	0
1	1	8	"VAC7"	"YNL054W"	2120	15630	120	2447	2386	1396	68	142	868	81	71	0	1649	1588	888	293	335	436	75	70	0	0	0	0	0	0	0	0	0	0	0	0	0	0	0	0	0	0	0	1.754	1.790	1.790	1.834	1.595	1.768	0.840	0.000	0.000	0.000	0.000	0.000	0.000	0.000	0.000	0.000	0.000	0.000	0.000	0.000	0.000	120	605	3735	3613	0.811	Error	Error	2379	1356	0	0	2318	1295	0	0	0	0
1	2	8	"mkt1"	"YNL085W"	2300	15630	120	8227	7203	4881	71	140	750	88	80	0	10531	8340	6171	291	357	631	83	77	0	0	0	0	0	0	0	0	0	0	0	0	0	0	0	0	0	0	0	0.796	0.886	0.851	1.052	2.138	0.817	0.883	0.000	0.000	0.000	0.000	0.000	0.000	0.000	0.000	0.000	0.000	0.000	0.000	0.000	0.000	120	548	18396	15181	-0.328	Error	Error	8156	10240	0	0	7132	8049	0	0	0	0
1	3	8	"BIO4"	"YNR057C"	2490	15620	110	8923	7143	3828	71	155	662	88	83	0	6003	4788	2713	285	381	660	80	76	0	0	0	0	0	0	0	0	0	0	0	0	0	0	0	0	0	0	0	1.548	1.571	1.512	1.738	1.809	1.522	0.897	0.000	0.000	0.000	0.000	0.000	0.000	0.000	0.000	0.000	0.000	0.000	0.000	0.000	0.000	80	511	14570	11575	0.630	Error	Error	8852	5718	0	0	7072	4503	0	0	0	0
1	4	8	"HTA3"	"YOL012C"	2680	15620	110	4080	3238	1798	77	185	652	81	77	0	2614	2082	1204	288	404	663	72	66	0	0	0	0	0	0	0	0	0	0	0	0	0	0	0	0	0	0	0	1.721	1.762	1.704	1.884	1.983	1.679	0.881	0.000	0.000	0.000	0.000	0.000	0.000	0.000	0.000	0.000	0.000	0.000	0.000	0.000	0.000	80	528	6329	4955	0.783	Error	Error	4003	2326	0	0	3161	1794	0	0	0	0
1	5	8	"NTG2"	"YOL043C"	2870	15620	110	9351	7760	3948	76	226	977	87	81	0	22794	19532	10105	300	807	3432	86	80	0	0	0	0	0	0	0	0	0	0	0	0	0	0	0	0	0	0	0	0.412	0.400	0.410	0.389	1.482	0.387	0.900	0.000	0.000	0.000	0.000	0.000	0.000	0.000	0.000	0.000	0.000	0.000	0.000	0.000	0.000	80	526	31769	26916	-1.278	Error	Error	9275	22494	0	0	7684	19232	0	0	0	0
1	6	8	""	"YNR059W"	3070	15630	120	8311	7058	3720	72	186	926	88	83	0	6996	5709	3121	299	758	3381	69	46	0	0	0	0	0	0	0	0	0	0	0	0	0	0	0	0	0	0	0	1.230	1.291	1.267	1.498	2.153	1.278	0.895	0.000	0.000	0.000	0.000	0.000	0.000	0.000	0.000	0.000	0.000	0.000	0.000	0.000	0.000	120	540	14936	12396	0.299	Error	Error	8239	6697	0	0	6986	5410	0	0	0	0
1	7	8	""	"YOL013W-A"	3240	15630	110	8560	7063	3386	75	272	1129	87	86	0	11846	9796	4868	305	737	2234	86	76	0	0	0	0	0	0	0	0	0	0	0	0	0	0	0	0	0	0	0	0.735	0.736	0.724	0.706	1.521	0.705	0.925	0.000	0.000	0.000	0.000	0.000	0.000	0.000	0.000	0.000	0.000	0.000	0.000	0.000	0.000	80	458	20026	16479	-0.444	Error	Error	8485	11541	0	0	6988	9491	0	0	0	0
1	8	8	""	"YOL045W"	3440	15630	120	1370	1206	640	77	251	1035	60	5	0	1244	1233	635	307	720	2206	2	0	0	0	0	0	0	0	0	0	0	0	0	0	0	0	0	0	0	0	0	1.380	1.219	1.182	1.137	2.037	0.353	0.338	0.000	0.000	0.000	0.000	0.000	0.000	0.000	0.000	0.000	0.000	0.000	0.000	0.000	0.000	120	581	2230	2055	0.465	Error	Error	1293	937	0	0	1129	926	0	0	0	0
1	9	8	""	"YNR061C"	3640	15630	120	8472	7599	4326	77	193	760	87	85	0	6053	5139	2962	297	375	823	82	76	0	0	0	0	0	0	0	0	0	0	0	0	0	0	0	0	0	0	0	1.458	1.553	1.597	1.766	1.914	1.557	0.914	0.000	0.000	0.000	0.000	0.000	0.000	0.000	0.000	0.000	0.000	0.000	0.000	0.000	0.000	120	532	14151	12364	0.544	Error	Error	8395	5756	0	0	7522	4842	0	0	0	0
1	10	8	""	"YOL015W"	3830	15640	110	7922	6906	3435	80	186	727	91	86	0	8024	6783	3508	291	326	317	93	90	0	0	0	0	0	0	0	0	0	0	0	0	0	0	0	0	0	0	0	1.014	1.051	1.073	1.132	1.540	1.031	0.893	0.000	0.000	0.000	0.000	0.000	0.000	0.000	0.000	0.000	0.000	0.000	0.000	0.000	0.000	80	465	15575	13318	0.020	Error	Error	7842	7733	0	0	6826	6492	0	0	0	0
1	11	8	""	"YOL047C"	4010	15630	110	5624	4759	2279	82	88	38	100	100	0	3205	2788	1272	290	298	89	92	90	0	0	0	0	0	0	0	0	0	0	0	0	0	0	0	0	0	0	0	1.901	1.872	1.907	2.012	1.775	1.841	0.900	0.000	0.000	0.000	0.000	0.000	0.000	0.000	0.000	0.000	0.000	0.000	0.000	0.000	0.000	80	478	8457	7175	0.927	Error	Error	5542	2915	0	0	4677	2498	0	0	0	0
1	12	8	""	"YNR063W"	4190	15630	110	11431	10855	3640	84	270	1231	100	97	0	15708	15350	4512	295	695	2391	100	100	0	0	0	0	0	0	0	0	0	0	0	0	0	0	0	0	0	0	0	0.736	0.715	0.708	0.696	1.365	0.692	0.912	0.000	0.000	0.000	0.000	0.000	0.000	0.000	0.000	0.000	0.000	0.000	0.000	0.000	0.000	80	491	26760	25826	-0.442	Error	Error	11347	15413	0	0	10771	15055	0	0	0	0
1	13	8	""	"YOL017W"	4380	15620	110	6464	5788	2516	78	314	1273	92	81	0	7448	7066	2875	304	792	2444	87	78	0	0	0	0	0	0	0	0	0	0	0	0	0	0	0	0	0	0	0	0.894	0.844	0.847	0.823	1.400	0.831	0.867	0.000	0.000	0.000	0.000	0.000	0.000	0.000	0.000	0.000	0.000	0.000	0.000	0.000	0.000	80	518	13530	12472	-0.162	Error	Error	6386	7144	0	0	5710	6762	0	0	0	0
1	14	8	"GSH2"	"YOL049W"	4570	15630	110	1644	1832	1599	74	139	451	80	67	0	2541	2738	2200	282	412	818	76	66	0	0	0	0	0	0	0	0	0	0	0	0	0	0	0	0	0	0	0	0.695	0.716	0.722	0.676	1.838	0.692	0.815	0.000	0.000	0.000	0.000	0.000	0.000	0.000	0.000	0.000	0.000	0.000	0.000	0.000	0.000	80	511	3829	4214	-0.525	Error	Error	1570	2259	0	0	1758	2456	0	0	0	0
1	15	8	"RIS1"	"YOR191W"	4760	15640	90	384	382	195	71	86	68	84	78	0	586	565	287	273	302	195	67	44	0	0	0	0	0	0	0	0	0	0	0	0	0	0	0	0	0	0	0	1.000	1.065	0.942	0.848	2.189	0.780	0.651	0.000	0.000	0.000	0.000	0.000	0.000	0.000	0.000	0.000	0.000	0.000	0.000	0.000	0.000	52	378	626	603	0.000	Error	Error	313	313	0	0	311	292	0	0	0	0
1	16	8	"MCT1"	"YOR221C"	4960	15630	120	9400	7998	3683	71	104	202	98	98	0	5065	4370	1989	282	303	268	95	90	0	0	0	0	0	0	0	0	0	0	0	0	0	0	0	0	0	0	0	1.950	1.939	1.885	2.002	1.622	1.971	0.915	0.000	0.000	0.000	0.000	0.000	0.000	0.000	0.000	0.000	0.000	0.000	0.000	0.000	0.000	120	568	14112	12015	0.964	Error	Error	9329	4783	0	0	7927	4088	0	0	0	0
1	17	8	""	"YOR253W"	5160	15630	110	3378	2940	1905	72	127	391	85	78	0	4023	3470	2126	277	324	621	77	73	0	0	0	0	0	0	0	0	0	0	0	0	0	0	0	0	0	0	0	0.883	0.898	0.902	0.932	1.867	0.871	0.889	0.000	0.000	0.000	0.000	0.000	0.000	0.000	0.000	0.000	0.000	0.000	0.000	0.000	0.000	80	428	7052	6061	-0.180	Error	Error	3306	3746	0	0	2868	3193	0	0	0	0
1	18	8	""	"YOR192C-A"	5330	15630	120	42140	36786	16262	76	94	145	99	99	0	23191	19564	9123	282	298	243	96	95	0	0	0	0	0	0	0	0	0	0	0	0	0	0	0	0	0	0	0	1.836	1.904	1.910	2.065	1.875	1.868	0.920	0.000	0.000	0.000	0.000	0.000	0.000	0.000	0.000	0.000	0.000	0.000	0.000	0.000	0.000	120	460	64973	55992	0.877	Error	Error	42064	22909	0	0	36710	19282	0	0	0	0
1	19	8	""	"YOR223W"	5510	15620	110	5726	4872	2169	79	221	789	90	83	0	3608	3107	1361	295	424	685	86	80	0	0	0	0	0	0	0	0	0	0	0	0	0	0	0	0	0	0	0	1.704	1.704	1.737	1.871	1.734	1.692	0.914	0.000	0.000	0.000	0.000	0.000	0.000	0.000	0.000	0.000	0.000	0.000	0.000	0.000	0.000	80	449	8960	7605	0.769	Error	Error	5647	3313	0	0	4793	2812	0	0	0	0
1	20	8	""	"YOR255W"	5710	15630	120	6445	5397	2657	76	185	693	92	85	0	4760	4194	1950	292	392	538	89	85	0	0	0	0	0	0	0	0	0	0	0	0	0	0	0	0	0	0	0	1.425	1.364	1.368	1.383	1.545	1.356	0.911	0.000	0.000	0.000	0.000	0.000	0.000	0.000	0.000	0.000	0.000	0.000	0.000	0.000	0.000	120	505	10837	9223	0.511	Error	Error	6369	4468	0	0	5321	3902	0	0	0	0
1	21	8	""	"YOR193W"	5900	15630	120	3017	2640	1152	75	100	285	91	90	0	2028	1880	807	289	323	376	84	81	0	0	0	0	0	0	0	0	0	0	0	0	0	0	0	0	0	0	0	1.692	1.612	1.615	1.880	2.063	1.597	0.900	0.000	0.000	0.000	0.000	0.000	0.000	0.000	0.000	0.000	0.000	0.000	0.000	0.000	0.000	120	471	4681	4156	0.759	Error	Error	2942	1739	0	0	2565	1591	0	0	0	0
1	22	8	""	"YOR225W"	6090	15630	120	1061	926	379	75	102	323	88	74	0	806	763	304	281	300	201	82	66	0	0	0	0	0	0	0	0	0	0	0	0	0	0	0	0	0	0	0	1.878	1.766	1.755	1.708	2.138	1.652	0.761	0.000	0.000	0.000	0.000	0.000	0.000	0.000	0.000	0.000	0.000	0.000	0.000	0.000	0.000	120	557	1511	1333	0.909	Error	Error	986	525	0	0	851	482	0	0	0	0
1	1	9	"cdc31"	"YOR257W"	2100	15810	110	8998	7484	4518	69	106	316	95	87	0	4305	3702	2197	293	331	339	87	80	0	0	0	0	0	0	0	0	0	0	0	0	0	0	0	0	0	0	0	2.226	2.175	2.228	2.350	1.658	2.167	0.902	0.000	0.000	0.000	0.000	0.000	0.000	0.000	0.000	0.000	0.000	0.000	0.000	0.000	0.000	80	486	12941	10824	1.154	Error	Error	8929	4012	0	0	7415	3409	0	0	0	0
1	2	9	"SLK19"	"YOR195W"	2280	15810	110	6998	6058	2810	72	181	630	93	88	0	8953	7963	3743	299	493	1174	87	81	0	0	0	0	0	0	0	0	0	0	0	0	0	0	0	0	0	0	0	0.800	0.781	0.775	0.814	1.393	0.761	0.888	0.000	0.000	0.000	0.000	0.000	0.000	0.000	0.000	0.000	0.000	0.000	0.000	0.000	0.000	80	454	15580	13650	-0.321	Error	Error	6926	8654	0	0	5986	7664	0	0	0	0
1	3	9	""	"YOR227W"	2470	15810	110	1882	1860	1140	72	150	532	83	78	0	2031	1862	1042	287	457	1097	70	25	0	0	0	0	0	0	0	0	0	0	0	0	0	0	0	0	0	0	0	1.038	1.135	1.071	1.150	1.831	1.137	0.848	0.000	0.000	0.000	0.000	0.000	0.000	0.000	0.000	0.000	0.000	0.000	0.000	0.000	0.000	80	496	3554	3363	0.054	Error	Error	1810	1744	0	0	1788	1575	0	0	0	0
1	4	9	"RPT4"	"YOR259C"	2660	15810	110	5409	4899	2397	72	196	828	90	86	0	3830	3540	1649	283	411	710	88	83	0	0	0	0	0	0	0	0	0	0	0	0	0	0	0	0	0	0	0	1.505	1.482	1.495	1.509	1.650	1.551	0.888	0.000	0.000	0.000	0.000	0.000	0.000	0.000	0.000	0.000	0.000	0.000	0.000	0.000	0.000	80	484	8884	8084	0.589	Error	Error	5337	3547	0	0	4827	3257	0	0	0	0
1	5	9	"NIP100"	"YPL174C"	2840	15810	110	8197	7616	2702	70	215	866	98	96	0	13768	12622	4305	281	526	1473	100	97	0	0	0	0	0	0	0	0	0	0	0	0	0	0	0	0	0	0	0	0.603	0.611	0.618	0.605	1.340	0.595	0.891	0.000	0.000	0.000	0.000	0.000	0.000	0.000	0.000	0.000	0.000	0.000	0.000	0.000	0.000	80	486	21614	19887	-0.731	Error	Error	8127	13487	0	0	7546	12341	0	0	0	0
1	6	9	""	"YPL205C"	3030	15810	110	3225	2948	1060	71	103	231	98	93	0	2013	1877	651	289	402	832	83	57	0	0	0	0	0	0	0	0	0	0	0	0	0	0	0	0	0	0	0	1.829	1.812	1.823	1.825	1.573	1.813	0.863	0.000	0.000	0.000	0.000	0.000	0.000	0.000	0.000	0.000	0.000	0.000	0.000	0.000	0.000	80	452	4878	4465	0.871	Error	Error	3154	1724	0	0	2877	1588	0	0	0	0
1	7	9	"SUI3"	"YPL237W"	3220	15810	120	7272	6335	2445	74	304	1377	92	87	0	5944	5124	2324	293	455	1091	90	85	0	0	0	0	0	0	0	0	0	0	0	0	0	0	0	0	0	0	0	1.274	1.296	1.287	1.469	1.964	1.268	0.865	0.000	0.000	0.000	0.000	0.000	0.000	0.000	0.000	0.000	0.000	0.000	0.000	0.000	0.000	120	573	12849	11092	0.349	Error	Error	7198	5651	0	0	6261	4831	0	0	0	0
1	8	9	""	"YPL176C"	3420	15810	110	8697	8170	3072	76	643	2282	91	85	0	5648	5017	1902	295	648	1534	86	80	0	0	0	0	0	0	0	0	0	0	0	0	0	0	0	0	0	0	0	1.610	1.714	1.699	1.748	1.323	1.746	0.894	0.000	0.000	0.000	0.000	0.000	0.000	0.000	0.000	0.000	0.000	0.000	0.000	0.000	0.000	80	464	13974	12816	0.688	Error	Error	8621	5353	0	0	8094	4722	0	0	0	0
1	9	9	""	"YPL207W"	3590	15810	110	8862	8556	4105	80	564	2008	95	83	0	4585	4717	2100	293	647	1488	88	76	0	0	0	0	0	0	0	0	0	0	0	0	0	0	0	0	0	0	0	2.046	1.916	1.869	1.902	1.312	1.892	0.917	0.000	0.000	0.000	0.000	0.000	0.000	0.000	0.000	0.000	0.000	0.000	0.000	0.000	0.000	80	484	13074	12900	1.033	Error	Error	8782	4292	0	0	8476	4424	0	0	0	0
1	10	9	"YAR1"	"YPL239W"	3790	15810	120	6366	5656	1971	76	251	1002	94	89	0	2523	2344	890	294	408	649	88	81	0	0	0	0	0	0	0	0	0	0	0	0	0	0	0	0	0	0	0	2.822	2.722	2.720	2.993	1.826	2.573	0.843	0.000	0.000	0.000	0.000	0.000	0.000	0.000	0.000	0.000	0.000	0.000	0.000	0.000	0.000	120	555	8519	7630	1.497	Error	Error	6290	2229	0	0	5580	2050	0	0	0	0
1	11	9	"MUD13"	"YPL178W"	3970	15810	110	4266	3745	1531	76	101	221	100	97	0	10174	9262	3383	295	434	1066	100	93	0	0	0	0	0	0	0	0	0	0	0	0	0	0	0	0	0	0	0	0.424	0.409	0.408	0.392	1.428	0.398	0.897	0.000	0.000	0.000	0.000	0.000	0.000	0.000	0.000	0.000	0.000	0.000	0.000	0.000	0.000	80	484	14069	12636	-1.237	Error	Error	4190	9879	0	0	3669	8967	0	0	0	0
1	12	9	"ipl1"	"YPL209C"	4150	15810	110	8568	7502	2925	84	210	845	100	93	0	2726	2582	994	295	474	1085	85	61	0	0	0	0	0	0	0	0	0	0	0	0	0	0	0	0	0	0	0	3.490	3.244	3.204	3.208	1.400	3.200	0.677	0.000	0.000	0.000	0.000	0.000	0.000	0.000	0.000	0.000	0.000	0.000	0.000	0.000	0.000	80	521	10915	9705	1.803	Error	Error	8484	2431	0	0	7418	2287	0	0	0	0
1	13	9	"cin2"	"YPL241C"	4350	15810	110	5055	4430	1727	79	257	970	92	82	0	2614	2367	874	292	408	571	93	81	0	0	0	0	0	0	0	0	0	0	0	0	0	0	0	0	0	0	0	2.143	2.097	2.074	2.103	1.498	2.086	0.908	0.000	0.000	0.000	0.000	0.000	0.000	0.000	0.000	0.000	0.000	0.000	0.000	0.000	0.000	80	540	7298	6426	1.100	Error	Error	4976	2322	0	0	4351	2075	0	0	0	0
1	14	9	""	"YPL180W"	4540	15810	110	10556	9722	3368	75	283	1107	98	97	0	4286	3970	1189	289	421	607	98	95	0	0	0	0	0	0	0	0	0	0	0	0	0	0	0	0	0	0	0	2.622	2.621	2.636	2.560	1.383	2.710	0.901	0.000	0.000	0.000	0.000	0.000	0.000	0.000	0.000	0.000	0.000	0.000	0.000	0.000	0.000	80	548	14478	13328	1.391	Error	Error	10481	3997	0	0	9647	3681	0	0	0	0
1	15	9	"NIP7"	"YPL211W"	4750	15820	120	3761	3304	1464	69	188	921	87	78	0	3016	2832	1174	285	352	480	90	87	0	0	0	0	0	0	0	0	0	0	0	0	0	0	0	0	0	0	0	1.352	1.270	1.281	1.343	1.632	1.290	0.899	0.000	0.000	0.000	0.000	0.000	0.000	0.000	0.000	0.000	0.000	0.000	0.000	0.000	0.000	120	596	6423	5782	0.435	Error	Error	3692	2731	0	0	3235	2547	0	0	0	0
1	16	9	"SRP68"	"YPL243W"	4930	15810	110	5129	4828	2608	68	82	137	97	95	0	10601	10004	5135	282	378	910	92	88	0	0	0	0	0	0	0	0	0	0	0	0	0	0	0	0	0	0	0	0.490	0.490	0.486	0.481	1.428	0.469	0.900	0.000	0.000	0.000	0.000	0.000	0.000	0.000	0.000	0.000	0.000	0.000	0.000	0.000	0.000	80	448	15380	14482	-1.028	Error	Error	5061	10319	0	0	4760	9722	0	0	0	0
1	17	9	"EMPTY"	"EMPTY"	5120	15810	150	109	128	77	72	99	203	5	0	0	301	342	161	276	344	753	1	0	0	0	0	0	0	0	0	0	0	0	0	0	0	0	0	0	0	0	0	1.480	0.848	0.696	0.657	3.280	0.141	0.656	0.000	0.000	0.000	0.000	0.000	0.000	0.000	0.000	0.000	0.000	0.000	0.000	0.000	0.000	156	660	62	122	0.566	Error	Error	37	25	0	0	56	66	0	0	-75	0
1	18	9	"EMPTY"	"EMPTY"	5310	15810	150	89	103	54	69	74	38	37	16	0	295	324	150	277	278	70	33	16	0	0	0	0	0	0	0	0	0	0	0	0	0	0	0	0	0	0	0	1.111	0.723	0.531	0.415	3.845	0.138	0.093	0.000	0.000	0.000	0.000	0.000	0.000	0.000	0.000	0.000	0.000	0.000	0.000	0.000	0.000	156	578	38	81	0.152	Error	Error	20	18	0	0	34	47	0	0	-75	0
1	19	9	"EMPTY"	"EMPTY"	5500	15810	150	87	104	71	69	148	597	0	0	0	297	345	220	283	345	448	5	0	0	0	0	0	0	0	0	0	0	0	0	0	0	0	0	0	0	0	0	1.286	0.565	0.372	0.477	3.634	0.914	0.513	0.000	0.000	0.000	0.000	0.000	0.000	0.000	0.000	0.000	0.000	0.000	0.000	0.000	0.000	156	621	32	97	0.363	Error	Error	18	14	0	0	35	62	0	0	-75	0
1	20	9	"EMPTY"	"EMPTY"	5690	15810	150	87	99	62	68	135	548	0	0	0	315	354	186	279	340	420	5	1	0	0	0	0	0	0	0	0	0	0	0	0	0	0	0	0	0	0	0	0.528	0.413	0.438	0.518	3.368	0.196	0.276	0.000	0.000	0.000	0.000	0.000	0.000	0.000	0.000	0.000	0.000	0.000	0.000	0.000	0.000	156	615	55	106	-0.922	Error	Error	19	36	0	0	31	75	0	0	-75	0
1	21	9	"EMPTY"	"EMPTY"	5880	15810	150	94	112	75	71	74	30	44	23	0	312	348	199	279	283	79	30	16	0	0	0	0	0	0	0	0	0	0	0	0	0	0	0	0	0	0	0	0.697	0.594	0.410	0.426	3.818	0.225	0.280	0.000	0.000	0.000	0.000	0.000	0.000	0.000	0.000	0.000	0.000	0.000	0.000	0.000	0.000	156	584	56	110	-0.521	Error	Error	23	33	0	0	41	69	0	0	-75	0
1	22	9	"EMPTY"	"EMPTY"	6070	15810	150	86	109	78	72	75	33	35	25	0	305	340	155	278	283	76	26	12	0	0	0	0	0	0	0	0	0	0	0	0	0	0	0	0	0	0	0	0.519	0.597	0.529	0.520	3.217	0.262	0.222	0.000	0.000	0.000	0.000	0.000	0.000	0.000	0.000	0.000	0.000	0.000	0.000	0.000	0.000	156	760	41	99	-0.948	Error	Error	14	27	0	0	37	62	0	0	-75	0
1	1	10	"EMPTY"	"EMPTY"	2090	16000	150	83	92	43	67	89	240	0	0	0	293	307	108	275	301	261	4	0	0	0	0	0	0	0	0	0	0	0	0	0	0	0	0	0	0	0	0	0.889	0.781	0.428	0.494	5.262	0.534	0.372	0.000	0.000	0.000	0.000	0.000	0.000	0.000	0.000	0.000	0.000	0.000	0.000	0.000	0.000	156	852	34	57	-0.170	Error	Error	16	18	0	0	25	32	0	0	-75	0
1	2	10	"EMPTY"	"EMPTY"	2280	16000	150	78	87	42	67	144	536	0	0	0	285	300	102	282	425	998	0	0	0	0	0	0	0	0	0	0	0	0	0	0	0	0	0	0	0	0	0	3.667	1.111	0.500	0.419	5.087	0.298	0.899	0.000	0.000	0.000	0.000	0.000	0.000	0.000	0.000	0.000	0.000	0.000	0.000	0.000	0.000	156	631	14	38	1.874	Error	Error	11	3	0	0	20	18	0	0	-75	0
1	3	10	"EMPTY"	"EMPTY"	2470	16000	150	85	92	44	67	118	440	0	0	0	298	319	123	280	389	880	0	0	0	0	0	0	0	0	0	0	0	0	0	0	0	0	0	0	0	0	0	1.000	0.641	0.416	0.459	3.476	0.099	0.056	0.000	0.000	0.000	0.000	0.000	0.000	0.000	0.000	0.000	0.000	0.000	0.000	0.000	0.000	156	651	36	64	0.000	Error	Error	18	18	0	0	25	39	0	0	-75	0
1	4	10	"EMPTY"	"EMPTY"	2660	16000	150	85	88	39	67	158	718	0	0	0	277	292	106	277	368	615	0	0	0	0	0	0	0	0	0	0	0	0	0	0	0	0	0	0	0	0	0	100000.000	1.400	0.554	0.561	4.955	0.747	0.886	0.000	0.000	0.000	0.000	0.000	0.000	0.000	0.000	0.000	0.000	0.000	0.000	0.000	0.000	156	645	18	36	16.610	Error	Error	18	0	0	0	21	15	0	0	-75	0
1	5	10	"EMPTY"	"EMPTY"	2850	16000	150	78	88	42	65	156	706	0	0	0	290	305	118	277	410	880	0	0	0	0	0	0	0	0	0	0	0	0	0	0	0	0	0	0	0	0	0	1.000	0.821	0.444	0.412	4.266	0.123	0.078	0.000	0.000	0.000	0.000	0.000	0.000	0.000	0.000	0.000	0.000	0.000	0.000	0.000	0.000	156	634	26	51	0.000	Error	Error	13	13	0	0	23	28	0	0	-75	0
1	6	10	"EMPTY"	"EMPTY"	3040	16000	150	87	93	44	67	84	162	1	0	0	284	304	109	273	330	587	0	0	0	0	0	0	0	0	0	0	0	0	0	0	0	0	0	0	0	0	0	1.818	0.839	0.422	0.524	4.663	0.093	0.034	0.000	0.000	0.000	0.000	0.000	0.000	0.000	0.000	0.000	0.000	0.000	0.000	0.000	0.000	156	709	31	57	0.862	Error	Error	20	11	0	0	26	31	0	0	-75	0
1	7	10	""	"iYBL019W"	3240	16010	110	539	524	205	70	72	27	96	95	0	1269	1185	430	269	287	303	87	76	0	0	0	0	0	0	0	0	0	0	0	0	0	0	0	0	0	0	0	0.469	0.496	0.497	0.498	1.618	0.459	0.806	0.000	0.000	0.000	0.000	0.000	0.000	0.000	0.000	0.000	0.000	0.000	0.000	0.000	0.000	80	478	1469	1370	-1.092	Error	Error	469	1000	0	0	454	916	0	0	0	0
1	8	10	""	"iYBL015W"	3430	16010	120	6297	5808	2745	70	137	740	97	90	0	14028	12955	6405	272	334	588	97	95	0	0	0	0	0	0	0	0	0	0	0	0	0	0	0	0	0	0	0	0.453	0.452	0.453	0.485	1.770	0.427	0.900	0.000	0.000	0.000	0.000	0.000	0.000	0.000	0.000	0.000	0.000	0.000	0.000	0.000	0.000	120	582	19983	18421	-1.143	Error	Error	6227	13756	0	0	5738	12683	0	0	0	0
1	9	10	""	"iYBL014C"	3610	16010	100	2809	2461	1195	74	89	105	98	93	0	1521	1429	689	268	292	169	90	86	0	0	0	0	0	0	0	0	0	0	0	0	0	0	0	0	0	0	0	2.183	2.056	1.956	2.080	1.702	1.990	0.826	0.000	0.000	0.000	0.000	0.000	0.000	0.000	0.000	0.000	0.000	0.000	0.000	0.000	0.000	80	466	3988	3548	1.126	Error	Error	2735	1253	0	0	2387	1161	0	0	0	0
1	10	10	""	"iYBR001C"	3810	16010	110	2510	2349	639	70	79	57	100	100	0	5132	5049	1212	277	297	162	100	100	0	0	0	0	0	0	0	0	0	0	0	0	0	0	0	0	0	0	0	0.503	0.478	0.462	0.466	1.302	0.457	0.915	0.000	0.000	0.000	0.000	0.000	0.000	0.000	0.000	0.000	0.000	0.000	0.000	0.000	0.000	80	524	7295	7051	-0.993	Error	Error	2440	4855	0	0	2279	4772	0	0	0	0
1	11	10	""	"iYBR005W"	4000	16010	110	4681	4145	1782	72	84	141	97	96	0	17792	16953	7579	280	360	717	95	93	0	0	0	0	0	0	0	0	0	0	0	0	0	0	0	0	0	0	0	0.263	0.244	0.242	0.252	1.572	0.225	0.902	0.000	0.000	0.000	0.000	0.000	0.000	0.000	0.000	0.000	0.000	0.000	0.000	0.000	0.000	80	536	22121	20746	-1.926	Error	Error	4609	17512	0	0	4073	16673	0	0	0	0
1	12	10	""	"iYBR008C"	4200	16010	120	5866	5247	2632	77	141	659	91	85	0	4355	4204	2180	289	347	415	89	85	0	0	0	0	0	0	0	0	0	0	0	0	0	0	0	0	0	0	0	1.424	1.321	1.344	1.443	1.745	1.295	0.905	0.000	0.000	0.000	0.000	0.000	0.000	0.000	0.000	0.000	0.000	0.000	0.000	0.000	0.000	120	597	9855	9085	0.510	Error	Error	5789	4066	0	0	5170	3915	0	0	0	0
1	13	10	""	"iYBR022W"	4390	16010	120	823	792	330	71	124	444	80	35	0	2486	2351	1005	292	325	293	91	89	0	0	0	0	0	0	0	0	0	0	0	0	0	0	0	0	0	0	0	0.343	0.350	0.374	0.374	1.797	0.321	0.863	0.000	0.000	0.000	0.000	0.000	0.000	0.000	0.000	0.000	0.000	0.000	0.000	0.000	0.000	120	582	2946	2780	-1.545	Error	Error	752	2194	0	0	721	2059	0	0	0	0
1	14	10	""	"iYBR027C"	4580	16020	110	580	539	239	71	88	290	75	40	0	769	743	294	289	301	201	80	60	0	0	0	0	0	0	0	0	0	0	0	0	0	0	0	0	0	0	0	1.060	1.031	0.951	0.983	2.089	0.899	0.713	0.000	0.000	0.000	0.000	0.000	0.000	0.000	0.000	0.000	0.000	0.000	0.000	0.000	0.000	80	509	989	922	0.085	Error	Error	509	480	0	0	468	454	0	0	0	0
1	15	10	""	"iYBR031W"	4760	16010	110	826	785	289	67	71	32	100	100	0	2559	2478	833	289	296	87	100	98	0	0	0	0	0	0	0	0	0	0	0	0	0	0	0	0	0	0	0	0.334	0.328	0.307	0.327	1.574	0.317	0.867	0.000	0.000	0.000	0.000	0.000	0.000	0.000	0.000	0.000	0.000	0.000	0.000	0.000	0.000	80	499	3029	2907	-1.581	Error	Error	759	2270	0	0	718	2189	0	0	0	0
1	16	10	""	"iYBRWdelta16"	4950	16010	110	3736	3272	1433	70	80	104	100	100	0	3400	3183	1256	284	315	506	93	91	0	0	0	0	0	0	0	0	0	0	0	0	0	0	0	0	0	0	0	1.177	1.105	1.130	1.099	1.709	1.099	0.880	0.000	0.000	0.000	0.000	0.000	0.000	0.000	0.000	0.000	0.000	0.000	0.000	0.000	0.000	80	549	6782	6101	0.235	Error	Error	3666	3116	0	0	3202	2899	0	0	0	0
1	17	10	""	"iYBR048W"	5150	16010	110	3422	2876	1412	71	76	54	100	100	0	10332	9247	4194	273	279	125	100	100	0	0	0	0	0	0	0	0	0	0	0	0	0	0	0	0	0	0	0	0.333	0.313	0.312	0.304	1.520	0.301	0.903	0.000	0.000	0.000	0.000	0.000	0.000	0.000	0.000	0.000	0.000	0.000	0.000	0.000	0.000	80	511	13410	11779	-1.586	Error	Error	3351	10059	0	0	2805	8974	0	0	0	0
1	18	10	""	"iYBR053C-0"	5330	16010	110	4213	3748	1458	69	76	60	100	98	0	1701	1562	555	276	282	108	97	93	0	0	0	0	0	0	0	0	0	0	0	0	0	0	0	0	0	0	0	2.908	2.861	2.853	2.905	1.451	2.922	0.870	0.000	0.000	0.000	0.000	0.000	0.000	0.000	0.000	0.000	0.000	0.000	0.000	0.000	0.000	80	510	5569	4965	1.540	Error	Error	4144	1425	0	0	3679	1286	0	0	0	0
1	19	10	""	"iYCR022C"	5530	16010	110	2736	2368	871	66	75	75	100	100	0	4737	4479	1625	283	288	112	100	100	0	0	0	0	0	0	0	0	0	0	0	0	0	0	0	0	0	0	0	0.599	0.549	0.541	0.546	1.333	0.521	0.905	0.000	0.000	0.000	0.000	0.000	0.000	0.000	0.000	0.000	0.000	0.000	0.000	0.000	0.000	80	511	7124	6498	-0.738	Error	Error	2670	4454	0	0	2302	4196	0	0	0	0
1	20	10	""	"iYCR025C"	5710	16020	110	1864	1746	750	67	70	30	100	100	0	1070	1025	368	276	278	75	95	91	0	0	0	0	0	0	0	0	0	0	0	0	0	0	0	0	0	0	0	2.263	2.242	2.390	2.365	1.761	2.266	0.812	0.000	0.000	0.000	0.000	0.000	0.000	0.000	0.000	0.000	0.000	0.000	0.000	0.000	0.000	80	511	2591	2428	1.178	Error	Error	1797	794	0	0	1679	749	0	0	0	0
1	21	10	""	"iYCRWdelta11"	5910	16010	110	3083	2772	1002	71	76	36	100	100	0	8119	7473	2532	275	280	78	100	100	0	0	0	0	0	0	0	0	0	0	0	0	0	0	0	0	0	0	0	0.384	0.375	0.380	0.367	1.276	0.360	0.918	0.000	0.000	0.000	0.000	0.000	0.000	0.000	0.000	0.000	0.000	0.000	0.000	0.000	0.000	80	523	10856	9899	-1.381	Error	Error	3012	7844	0	0	2701	7198	0	0	0	0
1	22	10	""	"iYCR043C"	6100	16010	110	742	668	273	69	76	51	96	88	0	757	729	282	278	286	94	86	83	0	0	0	0	0	0	0	0	0	0	0	0	0	0	0	0	0	0	0	1.405	1.328	1.324	1.267	1.624	1.225	0.743	0.000	0.000	0.000	0.000	0.000	0.000	0.000	0.000	0.000	0.000	0.000	0.000	0.000	0.000	80	537	1152	1050	0.491	Error	Error	673	479	0	0	599	451	0	0	0	0
1	1	11	""	"iYCR047C"	2110	16190	100	3599	3350	1241	66	68	26	100	100	0	2131	1983	759	268	273	71	97	96	0	0	0	0	0	0	0	0	0	0	0	0	0	0	0	0	0	0	0	1.896	1.915	1.938	2.042	1.577	1.912	0.875	0.000	0.000	0.000	0.000	0.000	0.000	0.000	0.000	0.000	0.000	0.000	0.000	0.000	0.000	80	468	5396	4999	0.923	Error	Error	3533	1863	0	0	3284	1715	0	0	0	0
1	2	11	""	"iYCR053W"	2300	16190	100	1100	1018	380	65	68	26	97	96	0	5804	5121	1972	270	274	66	98	96	0	0	0	0	0	0	0	0	0	0	0	0	0	0	0	0	0	0	0	0.187	0.196	0.198	0.200	1.501	0.179	0.891	0.000	0.000	0.000	0.000	0.000	0.000	0.000	0.000	0.000	0.000	0.000	0.000	0.000	0.000	80	444	6569	5804	-2.419	Error	Error	1035	5534	0	0	953	4851	0	0	0	0
1	3	11	""	"iYCR075C"	2480	16200	110	4980	4656	1864	69	76	46	100	100	0	4629	4322	1821	265	281	156	98	96	0	0	0	0	0	0	0	0	0	0	0	0	0	0	0	0	0	0	0	1.125	1.131	1.117	1.152	1.474	1.099	0.893	0.000	0.000	0.000	0.000	0.000	0.000	0.000	0.000	0.000	0.000	0.000	0.000	0.000	0.000	80	497	9275	8644	0.170	Error	Error	4911	4364	0	0	4587	4057	0	0	0	0
1	4	11	""	"iYCR081W"	2680	16190	110	2948	2766	946	68	74	44	100	100	0	3476	3182	1205	265	281	156	96	96	0	0	0	0	0	0	0	0	0	0	0	0	0	0	0	0	0	0	0	0.897	0.925	0.937	1.021	1.961	0.880	0.894	0.000	0.000	0.000	0.000	0.000	0.000	0.000	0.000	0.000	0.000	0.000	0.000	0.000	0.000	80	507	6091	5615	-0.157	Error	Error	2880	3211	0	0	2698	2917	0	0	0	0
1	5	11	""	"iYCR085W"	2870	16190	110	1718	1742	831	65	67	26	100	98	0	1125	1059	488	271	272	70	88	85	0	0	0	0	0	0	0	0	0	0	0	0	0	0	0	0	0	0	0	1.936	2.128	2.083	2.164	1.446	1.994	0.835	0.000	0.000	0.000	0.000	0.000	0.000	0.000	0.000	0.000	0.000	0.000	0.000	0.000	0.000	80	507	2507	2465	0.953	Error	Error	1653	854	0	0	1677	788	0	0	0	0
1	6	11	""	"itT(AGU)C"	3070	16200	110	3238	2947	1522	65	71	38	100	97	0	6151	5591	2785	259	269	73	93	92	0	0	0	0	0	0	0	0	0	0	0	0	0	0	0	0	0	0	0	0.539	0.541	0.517	0.561	1.728	0.503	0.879	0.000	0.000	0.000	0.000	0.000	0.000	0.000	0.000	0.000	0.000	0.000	0.000	0.000	0.000	80	513	9065	8214	-0.893	Error	Error	3173	5892	0	0	2882	5332	0	0	0	0
1	7	11	""	"iYCR100C"	3250	16190	110	3935	3300	1750	70	79	60	96	95	0	2378	1943	1074	264	281	101	83	82	0	0	0	0	0	0	0	0	0	0	0	0	0	0	0	0	0	0	0	1.828	1.924	1.935	2.113	1.801	1.797	0.861	0.000	0.000	0.000	0.000	0.000	0.000	0.000	0.000	0.000	0.000	0.000	0.000	0.000	0.000	80	525	5979	4909	0.870	Error	Error	3865	2114	0	0	3230	1679	0	0	0	0
1	8	11	""	"iYCR103C"	3450	16200	110	14605	11877	7132	71	88	94	100	95	0	15309	12760	7263	267	279	98	97	96	0	0	0	0	0	0	0	0	0	0	0	0	0	0	0	0	0	0	0	0.966	0.945	0.892	0.982	2.039	0.938	0.916	0.000	0.000	0.000	0.000	0.000	0.000	0.000	0.000	0.000	0.000	0.000	0.000	0.000	0.000	80	522	29576	24299	-0.050	Error	Error	14534	15042	0	0	11806	12493	0	0	0	0
1	9	11	""	"iYDR045C"	3650	16200	110	3457	3012	1238	72	84	81	100	98	0	5802	5156	2096	276	280	81	100	98	0	0	0	0	0	0	0	0	0	0	0	0	0	0	0	0	0	0	0	0.613	0.602	0.607	0.626	1.489	0.595	0.915	0.000	0.000	0.000	0.000	0.000	0.000	0.000	0.000	0.000	0.000	0.000	0.000	0.000	0.000	80	520	8911	7820	-0.707	Error	Error	3385	5526	0	0	2940	4880	0	0	0	0
1	10	11	""	"iYDR050C"	3830	16190	110	5080	4311	1757	72	75	32	100	100	0	2674	2475	1054	278	290	135	91	91	0	0	0	0	0	0	0	0	0	0	0	0	0	0	0	0	0	0	0	2.090	1.929	1.917	1.884	1.476	1.899	0.891	0.000	0.000	0.000	0.000	0.000	0.000	0.000	0.000	0.000	0.000	0.000	0.000	0.000	0.000	80	482	7404	6436	1.064	Error	Error	5008	2396	0	0	4239	2197	0	0	0	0
1	11	11	""	"iYDR055W"	4000	16200	100	850	793	295	72	78	56	98	95	0	874	823	346	276	292	107	85	80	0	0	0	0	0	0	0	0	0	0	0	0	0	0	0	0	0	0	0	1.301	1.318	1.351	1.324	2.338	1.158	0.760	0.000	0.000	0.000	0.000	0.000	0.000	0.000	0.000	0.000	0.000	0.000	0.000	0.000	0.000	80	440	1376	1268	0.380	Error	Error	778	598	0	0	721	547	0	0	0	0
1	12	11	""	"iYDR070C"	4190	16200	100	2393	2077	829	75	111	207	95	90	0	1949	1808	814	285	329	271	86	82	0	0	0	0	0	0	0	0	0	0	0	0	0	0	0	0	0	0	0	1.393	1.315	1.306	1.518	1.864	1.223	0.839	0.000	0.000	0.000	0.000	0.000	0.000	0.000	0.000	0.000	0.000	0.000	0.000	0.000	0.000	80	470	3982	3525	0.478	Error	Error	2318	1664	0	0	2002	1523	0	0	0	0
1	13	11	""	"iYDR074W"	4410	16200	110	3721	3199	1308	75	111	209	97	93	0	2192	2018	837	288	318	252	90	87	0	0	0	0	0	0	0	0	0	0	0	0	0	0	0	0	0	0	0	1.915	1.806	1.777	1.798	1.539	1.854	0.877	0.000	0.000	0.000	0.000	0.000	0.000	0.000	0.000	0.000	0.000	0.000	0.000	0.000	0.000	80	514	5550	4854	0.937	Error	Error	3646	1904	0	0	3124	1730	0	0	0	0
1	14	11	""	"iYDR078C"	4590	16200	110	1212	1117	413	71	77	55	98	96	0	1390	1287	490	289	298	88	93	91	0	0	0	0	0	0	0	0	0	0	0	0	0	0	0	0	0	0	0	1.036	1.048	1.052	1.096	1.732	1.026	0.826	0.000	0.000	0.000	0.000	0.000	0.000	0.000	0.000	0.000	0.000	0.000	0.000	0.000	0.000	80	499	2242	2044	0.051	Error	Error	1141	1101	0	0	1046	998	0	0	0	0
1	15	11	""	"iYDR092W"	4780	16200	110	2296	2181	828	67	72	35	100	100	0	1179	1173	435	289	298	86	92	91	0	0	0	0	0	0	0	0	0	0	0	0	0	0	0	0	0	0	0	2.504	2.391	2.420	2.392	1.358	2.382	0.829	0.000	0.000	0.000	0.000	0.000	0.000	0.000	0.000	0.000	0.000	0.000	0.000	0.000	0.000	80	508	3119	2998	1.325	Error	Error	2229	890	0	0	2114	884	0	0	0	0
1	16	11	""	"iYDR098C"	4960	16200	100	504	460	190	67	72	34	93	92	0	819	751	337	283	288	91	82	80	0	0	0	0	0	0	0	0	0	0	0	0	0	0	0	0	0	0	0	0.815	0.840	0.790	0.835	2.180	0.636	0.734	0.000	0.000	0.000	0.000	0.000	0.000	0.000	0.000	0.000	0.000	0.000	0.000	0.000	0.000	80	456	973	861	-0.295	Error	Error	437	536	0	0	393	468	0	0	0	0
1	17	11	""	"iYDRCdelta9-1"	5150	16200	100	664	664	378	68	82	78	91	82	0	631	629	339	277	303	303	55	16	0	0	0	0	0	0	0	0	0	0	0	0	0	0	0	0	0	0	0	1.684	1.693	1.489	1.526	2.140	1.411	0.690	0.000	0.000	0.000	0.000	0.000	0.000	0.000	0.000	0.000	0.000	0.000	0.000	0.000	0.000	80	466	950	948	0.752	Error	Error	596	354	0	0	596	352	0	0	0	0
1	18	11	""	"iYDR115W"	5340	16200	110	875	781	313	67	80	72	93	90	0	868	790	308	276	292	119	86	82	0	0	0	0	0	0	0	0	0	0	0	0	0	0	0	0	0	0	0	1.365	1.389	1.291	1.388	1.620	1.245	0.770	0.000	0.000	0.000	0.000	0.000	0.000	0.000	0.000	0.000	0.000	0.000	0.000	0.000	0.000	80	530	1400	1228	0.449	Error	Error	808	592	0	0	714	514	0	0	0	0
1	19	11	""	"iYDR119W"	5540	16200	110	3192	2839	1281	69	95	182	98	95	0	5406	4850	2112	286	350	491	93	90	0	0	0	0	0	0	0	0	0	0	0	0	0	0	0	0	0	0	0	0.610	0.607	0.609	0.672	1.857	0.577	0.909	0.000	0.000	0.000	0.000	0.000	0.000	0.000	0.000	0.000	0.000	0.000	0.000	0.000	0.000	80	521	8243	7334	-0.713	Error	Error	3123	5120	0	0	2770	4564	0	0	0	0
1	20	11	""	"iYDR123C"	5720	16200	110	2953	2758	1428	70	134	363	88	85	0	3283	2910	1391	278	412	699	82	78	0	0	0	0	0	0	0	0	0	0	0	0	0	0	0	0	0	0	0	0.959	1.021	1.050	1.038	1.607	0.964	0.825	0.000	0.000	0.000	0.000	0.000	0.000	0.000	0.000	0.000	0.000	0.000	0.000	0.000	0.000	80	484	5888	5320	-0.060	Error	Error	2883	3005	0	0	2688	2632	0	0	0	0
1	21	11	""	"iYDR431W"	5900	16200	110	341	309	147	72	117	319	37	0	0	541	544	262	277	360	503	16	0	0	0	0	0	0	0	0	0	0	0	0	0	0	0	0	0	0	0	0	1.019	0.888	0.789	0.748	2.209	0.675	0.837	0.000	0.000	0.000	0.000	0.000	0.000	0.000	0.000	0.000	0.000	0.000	0.000	0.000	0.000	80	494	533	504	0.027	Error	Error	269	264	0	0	237	267	0	0	0	0
1	22	11	""	"iYDR436W"	6080	16200	100	1885	1740	867	74	107	213	91	83	0	1122	1008	446	282	318	197	80	78	0	0	0	0	0	0	0	0	0	0	0	0	0	0	0	0	0	0	0	2.156	2.295	2.224	2.365	1.746	2.178	0.815	0.000	0.000	0.000	0.000	0.000	0.000	0.000	0.000	0.000	0.000	0.000	0.000	0.000	0.000	80	475	2651	2392	1.108	Error	Error	1811	840	0	0	1666	726	0	0	0	0
1	1	12	""	"iYDR439W-1"	2110	16380	110	8434	7147	3425	67	89	229	100	95	0	10084	8756	4007	270	331	609	100	93	0	0	0	0	0	0	0	0	0	0	0	0	0	0	0	0	0	0	0	0.853	0.834	0.835	0.775	1.503	0.812	0.924	0.000	0.000	0.000	0.000	0.000	0.000	0.000	0.000	0.000	0.000	0.000	0.000	0.000	0.000	80	549	18181	15566	-0.230	Error	Error	8367	9814	0	0	7080	8486	0	0	0	0
1	2	12	""	"iYDR457W"	2300	16390	110	279	286	159	66	91	233	41	6	0	610	599	319	273	336	622	12	1	0	0	0	0	0	0	0	0	0	0	0	0	0	0	0	0	0	0	0	0.632	0.675	0.542	0.562	2.294	0.487	0.593	0.000	0.000	0.000	0.000	0.000	0.000	0.000	0.000	0.000	0.000	0.000	0.000	0.000	0.000	80	525	550	546	-0.662	Error	Error	213	337	0	0	220	326	0	0	0	0
1	3	12	""	"iYDR461W"	2470	16380	110	6417	5286	2461	70	130	442	92	86	0	2703	2310	1120	262	301	263	86	78	0	0	0	0	0	0	0	0	0	0	0	0	0	0	0	0	0	0	0	2.600	2.547	2.508	2.715	1.538	2.567	0.892	0.000	0.000	0.000	0.000	0.000	0.000	0.000	0.000	0.000	0.000	0.000	0.000	0.000	0.000	80	479	8788	7264	1.379	Error	Error	6347	2441	0	0	5216	2048	0	0	0	0
1	4	12	""	"iYDR465C"	2660	16380	110	6382	5373	2692	74	193	662	85	81	0	4566	3853	2068	265	374	570	81	76	0	0	0	0	0	0	0	0	0	0	0	0	0	0	0	0	0	0	0	1.467	1.477	1.519	1.666	1.593	1.451	0.896	0.000	0.000	0.000	0.000	0.000	0.000	0.000	0.000	0.000	0.000	0.000	0.000	0.000	0.000	80	538	10609	8887	0.553	Error	Error	6308	4301	0	0	5299	3588	0	0	0	0
1	5	12	""	"iYDR481C"	2860	16380	110	1898	1621	868	70	142	526	78	75	0	1355	1248	639	273	346	511	72	56	0	0	0	0	0	0	0	0	0	0	0	0	0	0	0	0	0	0	0	1.689	1.591	1.661	1.635	1.687	1.586	0.837	0.000	0.000	0.000	0.000	0.000	0.000	0.000	0.000	0.000	0.000	0.000	0.000	0.000	0.000	80	526	2910	2526	0.757	Error	Error	1828	1082	0	0	1551	975	0	0	0	0
1	6	12	""	"iYDR485C"	3040	16390	100	2320	1957	1040	72	93	123	90	82	0	1460	1269	689	269	289	158	77	75	0	0	0	0	0	0	0	0	0	0	0	0	0	0	0	0	0	0	0	1.887	1.885	1.812	1.909	1.554	1.784	0.838	0.000	0.000	0.000	0.000	0.000	0.000	0.000	0.000	0.000	0.000	0.000	0.000	0.000	0.000	80	454	3439	2885	0.916	Error	Error	2248	1191	0	0	1885	1000	0	0	0	0
1	7	12	""	"iYDR489W"	3230	16390	100	1269	1114	607	74	103	150	82	81	0	1221	1071	561	275	316	213	76	73	0	0	0	0	0	0	0	0	0	0	0	0	0	0	0	0	0	0	0	1.263	1.307	1.255	1.287	2.346	1.213	0.803	0.000	0.000	0.000	0.000	0.000	0.000	0.000	0.000	0.000	0.000	0.000	0.000	0.000	0.000	80	472	2141	1836	0.337	Error	Error	1195	946	0	0	1040	796	0	0	0	0
1	8	12	""	"itL(CAA)D"	3420	16380	110	3588	3164	2195	74	96	121	92	82	0	3204	3079	2125	272	312	226	72	71	0	0	0	0	0	0	0	0	0	0	0	0	0	0	0	0	0	0	0	1.198	1.101	1.064	1.130	2.137	1.053	0.910	0.000	0.000	0.000	0.000	0.000	0.000	0.000	0.000	0.000	0.000	0.000	0.000	0.000	0.000	80	528	6446	5897	0.261	Error	Error	3514	2932	0	0	3090	2807	0	0	0	0
1	9	12	""	"iYDR511W"	3620	16380	110	801	702	351	71	98	271	77	68	0	867	809	376	277	309	303	75	48	0	0	0	0	0	0	0	0	0	0	0	0	0	0	0	0	0	0	0	1.237	1.186	1.111	1.057	1.982	1.050	0.804	0.000	0.000	0.000	0.000	0.000	0.000	0.000	0.000	0.000	0.000	0.000	0.000	0.000	0.000	80	526	1320	1163	0.307	Error	Error	730	590	0	0	631	532	0	0	0	0
1	10	12	""	"iYDR516C"	3800	16380	110	4805	3919	1972	76	110	286	93	83	0	2756	2415	1186	282	321	272	87	81	0	0	0	0	0	0	0	0	0	0	0	0	0	0	0	0	0	0	0	1.911	1.802	1.812	1.839	1.525	1.781	0.897	0.000	0.000	0.000	0.000	0.000	0.000	0.000	0.000	0.000	0.000	0.000	0.000	0.000	0.000	80	528	7203	5976	0.935	Error	Error	4729	2474	0	0	3843	2133	0	0	0	0
1	11	12	""	"iYER141W"	3990	16380	110	356	357	165	73	103	276	52	5	0	966	881	412	278	320	276	78	66	0	0	0	0	0	0	0	0	0	0	0	0	0	0	0	0	0	0	0	0.411	0.471	0.409	0.455	1.984	0.388	0.707	0.000	0.000	0.000	0.000	0.000	0.000	0.000	0.000	0.000	0.000	0.000	0.000	0.000	0.000	80	504	971	887	-1.282	Error	Error	283	688	0	0	284	603	0	0	0	0
1	12	12	""	"iYER145C"	4170	16380	110	2265	2166	1389	75	106	208	88	82	0	1402	1260	765	278	308	171	75	73	0	0	0	0	0	0	0	0	0	0	0	0	0	0	0	0	0	0	0	1.948	2.129	1.914	1.989	2.114	2.085	0.840	0.000	0.000	0.000	0.000	0.000	0.000	0.000	0.000	0.000	0.000	0.000	0.000	0.000	0.000	80	498	3314	3073	0.962	Error	Error	2190	1124	0	0	2091	982	0	0	0	0
1	13	12	""	"iYER149C"	4360	16390	120	3801	3596	1907	75	109	203	95	91	0	5260	4655	2570	283	309	160	91	90	0	0	0	0	0	0	0	0	0	0	0	0	0	0	0	0	0	0	0	0.749	0.805	0.792	0.932	1.907	0.757	0.906	0.000	0.000	0.000	0.000	0.000	0.000	0.000	0.000	0.000	0.000	0.000	0.000	0.000	0.000	120	564	8703	7893	-0.418	Error	Error	3726	4977	0	0	3521	4372	0	0	0	0
1	14	12	""	"iYER163C-0"	4540	16380	110	5046	4193	2206	78	165	569	90	82	0	1880	1623	802	291	335	267	81	76	0	0	0	0	0	0	0	0	0	0	0	0	0	0	0	0	0	0	0	3.126	3.089	3.197	3.246	1.514	3.142	0.858	0.000	0.000	0.000	0.000	0.000	0.000	0.000	0.000	0.000	0.000	0.000	0.000	0.000	0.000	80	511	6557	5447	1.645	Error	Error	4968	1589	0	0	4115	1332	0	0	0	0
1	15	12	""	"iYER166W"	4740	16380	110	3923	3573	1996	74	190	617	87	81	0	2120	2003	1045	293	365	355	81	78	0	0	0	0	0	0	0	0	0	0	0	0	0	0	0	0	0	0	0	2.107	2.046	2.017	2.064	2.222	2.055	0.885	0.000	0.000	0.000	0.000	0.000	0.000	0.000	0.000	0.000	0.000	0.000	0.000	0.000	0.000	80	529	5676	5209	1.075	Error	Error	3849	1827	0	0	3499	1710	0	0	0	0
1	16	12	""	"iYER170W"	4920	16380	110	1457	1328	657	69	124	323	86	77	0	1220	1173	508	287	334	297	87	71	0	0	0	0	0	0	0	0	0	0	0	0	0	0	0	0	0	0	0	1.488	1.421	1.394	1.422	1.683	1.360	0.835	0.000	0.000	0.000	0.000	0.000	0.000	0.000	0.000	0.000	0.000	0.000	0.000	0.000	0.000	80	518	2321	2145	0.573	Error	Error	1388	933	0	0	1259	886	0	0	0	0
1	17	12	""	"iYER183C-1"	5110	16380	110	4696	4193	1928	69	152	491	90	88	0	12303	10488	4857	283	586	1753	86	85	0	0	0	0	0	0	0	0	0	0	0	0	0	0	0	0	0	0	0	0.385	0.404	0.395	0.405	1.416	0.378	0.911	0.000	0.000	0.000	0.000	0.000	0.000	0.000	0.000	0.000	0.000	0.000	0.000	0.000	0.000	80	531	16647	14329	-1.377	Error	Error	4627	12020	0	0	4124	10205	0	0	0	0
1	18	12	""	"iYERComega1-0"	5300	16380	110	2680	2607	1548	73	162	510	86	80	0	1952	1912	984	279	597	1763	47	1	0	0	0	0	0	0	0	0	0	0	0	0	0	0	0	0	0	0	0	1.558	1.552	1.501	1.656	1.887	1.438	0.674	0.000	0.000	0.000	0.000	0.000	0.000	0.000	0.000	0.000	0.000	0.000	0.000	0.000	0.000	80	531	4280	4167	0.640	Error	Error	2607	1673	0	0	2534	1633	0	0	0	0
1	19	12	""	"iYERWomega2-1"	5490	16380	100	19471	18384	9234	75	528	2674	95	86	0	17570	16620	8545	282	759	2519	91	85	0	0	0	0	0	0	0	0	0	0	0	0	0	0	0	0	0	0	0	1.122	1.121	1.084	1.154	1.403	1.127	0.901	0.000	0.000	0.000	0.000	0.000	0.000	0.000	0.000	0.000	0.000	0.000	0.000	0.000	0.000	80	471	36684	34647	0.166	Error	Error	19396	17288	0	0	18309	16338	0	0	0	0
1	20	12	""	"iYFL054C"	5680	16380	110	914	898	443	75	475	2518	0	0	0	826	814	323	295	707	2368	0	0	0	0	0	0	0	0	0	0	0	0	0	0	0	0	0	0	0	0	0	1.580	1.586	1.605	1.505	1.644	0.541	0.705	0.000	0.000	0.000	0.000	0.000	0.000	0.000	0.000	0.000	0.000	0.000	0.000	0.000	0.000	80	531	1370	1342	0.660	Error	Error	839	531	0	0	823	519	0	0	0	0
1	21	12	""	"iYFL051C-0"	5870	16380	110	9419	8597	4992	74	165	597	95	90	0	16054	14363	7821	301	557	1853	91	82	0	0	0	0	0	0	0	0	0	0	0	0	0	0	0	0	0	0	0	0.593	0.606	0.606	0.601	1.441	0.594	0.908	0.000	0.000	0.000	0.000	0.000	0.000	0.000	0.000	0.000	0.000	0.000	0.000	0.000	0.000	80	529	25098	22585	-0.753	Error	Error	9345	15753	0	0	8523	14062	0	0	0	0
1	22	12	""	"iYFL048C"	6060	16380	110	1220	1144	326	76	170	591	90	42	0	1006	990	266	292	540	1804	0	0	0	0	0	0	0	0	0	0	0	0	0	0	0	0	0	0	0	0	0	1.602	1.530	1.519	1.572	1.502	1.504	0.762	0.000	0.000	0.000	0.000	0.000	0.000	0.000	0.000	0.000	0.000	0.000	0.000	0.000	0.000	80	560	1858	1766	0.680	Error	Error	1144	714	0	0	1068	698	0	0	0	0
1	1	13	""	"iYGL095C"	2090	16560	110	2557	2678	2349	67	89	188	82	77	0	2852	2591	2125	271	322	439	66	61	0	0	0	0	0	0	0	0	0	0	0	0	0	0	0	0	0	0	0	0.965	1.125	1.141	1.303	2.153	1.125	0.877	0.000	0.000	0.000	0.000	0.000	0.000	0.000	0.000	0.000	0.000	0.000	0.000	0.000	0.000	80	568	5071	4931	-0.052	Error	Error	2490	2581	0	0	2611	2320	0	0	0	0
1	2	13	""	"iYGL091C"	2270	16580	90	167	178	91	69	90	170	21	1	0	461	422	163	278	324	354	9	0	0	0	0	0	0	0	0	0	0	0	0	0	0	0	0	0	0	0	0	0.536	0.757	0.615	0.555	2.830	0.337	0.323	0.000	0.000	0.000	0.000	0.000	0.000	0.000	0.000	0.000	0.000	0.000	0.000	0.000	0.000	52	386	281	253	-0.901	Error	Error	98	183	0	0	109	144	0	0	0	0
1	3	13	""	"iYGL087C"	2460	16560	110	2368	2074	1129	70	146	417	90	77	0	1602	1441	785	269	324	291	80	70	0	0	0	0	0	0	0	0	0	0	0	0	0	0	0	0	0	0	0	1.724	1.710	1.726	1.978	2.024	1.601	0.868	0.000	0.000	0.000	0.000	0.000	0.000	0.000	0.000	0.000	0.000	0.000	0.000	0.000	0.000	80	549	3631	3176	0.786	Error	Error	2298	1333	0	0	2004	1172	0	0	0	0
1	4	13	""	"iYGL068W"	2660	16570	100	3189	2771	1571	71	151	378	82	80	0	2151	1822	1070	276	351	344	76	73	0	0	0	0	0	0	0	0	0	0	0	0	0	0	0	0	0	0	0	1.663	1.746	1.728	1.887	1.710	1.626	0.853	0.000	0.000	0.000	0.000	0.000	0.000	0.000	0.000	0.000	0.000	0.000	0.000	0.000	0.000	80	490	4993	4246	0.734	Error	Error	3118	1875	0	0	2700	1546	0	0	0	0
1	5	13	""	"iYGL064C"	2850	16570	100	3073	2646	1402	72	115	267	85	82	0	1583	1379	710	284	327	263	78	77	0	0	0	0	0	0	0	0	0	0	0	0	0	0	0	0	0	0	0	2.310	2.351	2.260	2.326	1.549	2.285	0.855	0.000	0.000	0.000	0.000	0.000	0.000	0.000	0.000	0.000	0.000	0.000	0.000	0.000	0.000	80	481	4300	3669	1.208	Error	Error	3001	1299	0	0	2574	1095	0	0	0	0
1	6	13	""	"iYGL060W"	3040	16570	110	2249	1889	1063	78	142	325	77	75	0	1745	1467	788	278	338	310	76	72	0	0	0	0	0	0	0	0	0	0	0	0	0	0	0	0	0	0	0	1.480	1.523	1.533	1.396	1.934	1.458	0.842	0.000	0.000	0.000	0.000	0.000	0.000	0.000	0.000	0.000	0.000	0.000	0.000	0.000	0.000	80	526	3638	3000	0.565	Error	Error	2171	1467	0	0	1811	1189	0	0	0	0
1	7	13	""	"iYGLWdelta10"	3230	16570	110	4424	3973	2237	77	175	526	87	81	0	2509	2449	1368	279	372	450	87	80	0	0	0	0	0	0	0	0	0	0	0	0	0	0	0	0	0	0	0	1.949	1.795	1.705	1.774	1.866	1.747	0.873	0.000	0.000	0.000	0.000	0.000	0.000	0.000	0.000	0.000	0.000	0.000	0.000	0.000	0.000	80	526	6577	6066	0.963	Error	Error	4347	2230	0	0	3896	2170	0	0	0	0
1	8	13	""	"iYGL042C"	3420	16570	110	2835	2440	1534	76	175	547	76	72	0	3280	2856	1748	282	401	582	76	72	0	0	0	0	0	0	0	0	0	0	0	0	0	0	0	0	0	0	0	0.920	0.918	0.866	0.866	1.869	0.881	0.884	0.000	0.000	0.000	0.000	0.000	0.000	0.000	0.000	0.000	0.000	0.000	0.000	0.000	0.000	80	538	5757	4938	-0.120	Error	Error	2759	2998	0	0	2364	2574	0	0	0	0
1	9	13	""	"itL(CAA)G2"	3610	16580	110	4701	3907	2089	75	179	591	85	77	0	3909	3288	1681	285	417	681	85	73	0	0	0	0	0	0	0	0	0	0	0	0	0	0	0	0	0	0	0	1.276	1.276	1.242	1.230	1.561	1.302	0.862	0.000	0.000	0.000	0.000	0.000	0.000	0.000	0.000	0.000	0.000	0.000	0.000	0.000	0.000	80	538	8250	6835	0.352	Error	Error	4626	3624	0	0	3832	3003	0	0	0	0
1	10	13	""	"iYGL026C"	3800	16580	100	1513	1836	1645	77	179	541	60	57	0	913	1046	875	288	380	515	53	38	0	0	0	0	0	0	0	0	0	0	0	0	0	0	0	0	0	0	0	2.298	2.321	2.157	2.087	2.494	2.030	0.842	0.000	0.000	0.000	0.000	0.000	0.000	0.000	0.000	0.000	0.000	0.000	0.000	0.000	0.000	80	480	2061	2517	1.200	Error	Error	1436	625	0	0	1759	758	0	0	0	0
1	11	13	""	"iYGL021W"	3990	16570	110	669	606	347	74	118	243	72	58	0	1230	1116	598	276	326	210	78	71	0	0	0	0	0	0	0	0	0	0	0	0	0	0	0	0	0	0	0	0.624	0.633	0.640	0.598	2.539	0.568	0.817	0.000	0.000	0.000	0.000	0.000	0.000	0.000	0.000	0.000	0.000	0.000	0.000	0.000	0.000	80	538	1549	1372	-0.681	Error	Error	595	954	0	0	532	840	0	0	0	0
1	12	13	""	"iYGL017W"	4180	16580	100	1964	1635	1022	76	165	389	80	70	0	1376	1125	738	283	365	321	66	63	0	0	0	0	0	0	0	0	0	0	0	0	0	0	0	0	0	0	0	1.727	1.852	1.762	1.907	1.811	1.653	0.828	0.000	0.000	0.000	0.000	0.000	0.000	0.000	0.000	0.000	0.000	0.000	0.000	0.000	0.000	80	471	2981	2401	0.789	Error	Error	1888	1093	0	0	1559	842	0	0	0	0
1	13	13	""	"iYGR269W"	4360	16570	110	1621	1702	1240	81	192	432	77	70	0	878	801	499	286	359	298	62	50	0	0	0	0	0	0	0	0	0	0	0	0	0	0	0	0	0	0	0	2.601	3.148	2.638	2.325	2.825	2.515	0.746	0.000	0.000	0.000	0.000	0.000	0.000	0.000	0.000	0.000	0.000	0.000	0.000	0.000	0.000	80	514	2132	2136	1.379	Error	Error	1540	592	0	0	1621	515	0	0	0	0
1	14	13	""	"iYGR273C"	4570	16580	110	1615	1703	1143	78	133	353	82	72	0	4476	4371	3023	294	324	201	81	80	0	0	0	0	0	0	0	0	0	0	0	0	0	0	0	0	0	0	0	0.368	0.399	0.364	0.380	1.906	0.372	0.903	0.000	0.000	0.000	0.000	0.000	0.000	0.000	0.000	0.000	0.000	0.000	0.000	0.000	0.000	80	559	5719	5702	-1.444	Error	Error	1537	4182	0	0	1625	4077	0	0	0	0
1	15	13	""	"iYGR277C"	4760	16580	110	1485	1349	837	73	95	170	83	80	0	852	806	437	293	307	119	78	73	0	0	0	0	0	0	0	0	0	0	0	0	0	0	0	0	0	0	0	2.526	2.487	2.305	1.929	2.692	2.259	0.789	0.000	0.000	0.000	0.000	0.000	0.000	0.000	0.000	0.000	0.000	0.000	0.000	0.000	0.000	80	517	1971	1789	1.337	Error	Error	1412	559	0	0	1276	513	0	0	0	0
1	16	13	""	"iYGR292W-0"	4930	16580	100	3063	2848	1785	72	185	555	83	77	0	2084	1866	1214	295	369	412	75	68	0	0	0	0	0	0	0	0	0	0	0	0	0	0	0	0	0	0	0	1.672	1.767	1.672	1.872	2.584	1.652	0.847	0.000	0.000	0.000	0.000	0.000	0.000	0.000	0.000	0.000	0.000	0.000	0.000	0.000	0.000	80	468	4780	4347	0.741	Error	Error	2991	1789	0	0	2776	1571	0	0	0	0
1	17	13	""	"iYGR295C-1"	5130	16580	110	15230	15386	10136	74	307	1086	83	83	0	16008	14664	8892	288	661	2129	82	81	0	0	0	0	0	0	0	0	0	0	0	0	0	0	0	0	0	0	0	0.964	1.065	1.026	1.001	1.513	1.069	0.888	0.000	0.000	0.000	0.000	0.000	0.000	0.000	0.000	0.000	0.000	0.000	0.000	0.000	0.000	80	549	30876	29688	-0.053	Error	Error	15156	15720	0	0	15312	14376	0	0	0	0
1	18	13	""	"iYHL048W"	5320	16580	100	1592	1558	823	74	245	1013	67	35	0	3063	2812	1542	298	636	2094	62	16	0	0	0	0	0	0	0	0	0	0	0	0	0	0	0	0	0	0	0	0.549	0.590	0.574	0.668	2.099	0.528	0.842	0.000	0.000	0.000	0.000	0.000	0.000	0.000	0.000	0.000	0.000	0.000	0.000	0.000	0.000	80	491	4283	3998	-0.865	Error	Error	1518	2765	0	0	1484	2514	0	0	0	0
1	19	13	""	"iYHL034C"	5520	16570	110	1213	1251	958	74	213	1333	43	6	0	874	833	557	295	446	1111	8	3	0	0	0	0	0	0	0	0	0	0	0	0	0	0	0	0	0	0	0	1.967	2.188	1.917	1.870	2.599	2.042	0.737	0.000	0.000	0.000	0.000	0.000	0.000	0.000	0.000	0.000	0.000	0.000	0.000	0.000	0.000	80	538	1718	1715	0.976	Error	Error	1139	579	0	0	1177	538	0	0	0	0
1	20	13	""	"iYHL030W"	5700	16580	100	1183	1041	463	72	109	179	87	83	0	3619	3065	1628	303	430	634	77	72	0	0	0	0	0	0	0	0	0	0	0	0	0	0	0	0	0	0	0	0.335	0.351	0.354	0.436	2.042	0.302	0.866	0.000	0.000	0.000	0.000	0.000	0.000	0.000	0.000	0.000	0.000	0.000	0.000	0.000	0.000	80	473	4427	3731	-1.578	Error	Error	1111	3316	0	0	969	2762	0	0	0	0
1	21	13	""	"iYHL026C"	5890	16580	100	2237	2084	1198	78	181	429	80	77	0	1783	1685	945	306	509	864	71	45	0	0	0	0	0	0	0	0	0	0	0	0	0	0	0	0	0	0	0	1.462	1.455	1.400	1.535	2.119	1.383	0.849	0.000	0.000	0.000	0.000	0.000	0.000	0.000	0.000	0.000	0.000	0.000	0.000	0.000	0.000	80	482	3636	3385	0.548	Error	Error	2159	1477	0	0	2006	1379	0	0	0	0
1	22	13	""	"iYHL011C"	6080	16580	100	1437	1309	641	85	202	440	82	76	0	1207	1080	543	305	405	375	73	67	0	0	0	0	0	0	0	0	0	0	0	0	0	0	0	0	0	0	0	1.499	1.579	1.437	1.543	2.039	1.410	0.806	0.000	0.000	0.000	0.000	0.000	0.000	0.000	0.000	0.000	0.000	0.000	0.000	0.000	0.000	80	504	2254	1999	0.584	Error	Error	1352	902	0	0	1224	775	0	0	0	0
1	1	14	""	"iYHLWdelta2"	2100	16770	100	439	454	285	66	80	186	75	50	0	1287	1237	692	275	467	3020	0	0	0	0	0	0	0	0	0	0	0	0	0	0	0	0	0	0	0	0	0	0.369	0.403	0.333	0.341	1.889	0.076	0.769	0.000	0.000	0.000	0.000	0.000	0.000	0.000	0.000	0.000	0.000	0.000	0.000	0.000	0.000	80	495	1385	1350	-1.440	Error	Error	373	1012	0	0	388	962	0	0	0	0
1	2	14	""	"iYHL003C"	2280	16760	110	3035	2699	1622	70	114	299	85	81	0	6707	5649	3695	280	583	3095	67	52	0	0	0	0	0	0	0	0	0	0	0	0	0	0	0	0	0	0	0	0.461	0.490	0.467	0.581	2.130	0.237	0.510	0.000	0.000	0.000	0.000	0.000	0.000	0.000	0.000	0.000	0.000	0.000	0.000	0.000	0.000	80	518	9392	7998	-1.116	Error	Error	2965	6427	0	0	2629	5369	0	0	0	0
1	3	14	""	"iYIL106W"	2490	16760	110	1409	1212	780	71	115	272	77	71	0	3025	2642	1760	269	404	910	68	63	0	0	0	0	0	0	0	0	0	0	0	0	0	0	0	0	0	0	0	0.485	0.481	0.458	0.487	1.919	0.435	0.864	0.000	0.000	0.000	0.000	0.000	0.000	0.000	0.000	0.000	0.000	0.000	0.000	0.000	0.000	80	528	4094	3514	-1.042	Error	Error	1338	2756	0	0	1141	2373	0	0	0	0
1	4	14	""	"iYIL103W-1"	2670	16770	100	2945	2738	1754	72	98	134	86	83	0	1522	1452	969	274	315	240	76	71	0	0	0	0	0	0	0	0	0	0	0	0	0	0	0	0	0	0	0	2.302	2.263	2.223	2.271	2.243	2.116	0.844	0.000	0.000	0.000	0.000	0.000	0.000	0.000	0.000	0.000	0.000	0.000	0.000	0.000	0.000	80	461	4121	3844	1.203	Error	Error	2873	1248	0	0	2666	1178	0	0	0	0
1	5	14	""	"iYIL100W"	2860	16770	110	1268	1220	745	73	104	137	86	83	0	1087	992	606	288	313	181	75	67	0	0	0	0	0	0	0	0	0	0	0	0	0	0	0	0	0	0	0	1.496	1.629	1.510	1.471	1.991	1.471	0.810	0.000	0.000	0.000	0.000	0.000	0.000	0.000	0.000	0.000	0.000	0.000	0.000	0.000	0.000	80	507	1994	1851	0.581	Error	Error	1195	799	0	0	1147	704	0	0	0	0
1	6	14	""	"iYIL088C"	3050	16770	100	2379	1978	1018	78	130	224	86	82	0	1934	1679	945	291	349	314	78	73	0	0	0	0	0	0	0	0	0	0	0	0	0	0	0	0	0	0	0	1.400	1.369	1.329	1.446	2.021	1.225	0.848	0.000	0.000	0.000	0.000	0.000	0.000	0.000	0.000	0.000	0.000	0.000	0.000	0.000	0.000	80	471	3944	3288	0.486	Error	Error	2301	1643	0	0	1900	1388	0	0	0	0
1	7	14	""	"itI(AAU)I2"	3240	16770	100	1524	1251	670	77	146	262	82	77	0	1730	1444	904	289	373	366	72	65	0	0	0	0	0	0	0	0	0	0	0	0	0	0	0	0	0	0	0	1.004	1.016	0.949	1.132	2.324	0.843	0.846	0.000	0.000	0.000	0.000	0.000	0.000	0.000	0.000	0.000	0.000	0.000	0.000	0.000	0.000	80	471	2888	2329	0.006	Error	Error	1447	1441	0	0	1174	1155	0	0	0	0
1	8	14	""	"iYIL076W"	3430	16770	100	1540	1453	883	75	109	157	83	78	0	6701	6257	3797	290	374	429	80	78	0	0	0	0	0	0	0	0	0	0	0	0	0	0	0	0	0	0	0	0.229	0.231	0.237	0.300	3.075	0.211	0.884	0.000	0.000	0.000	0.000	0.000	0.000	0.000	0.000	0.000	0.000	0.000	0.000	0.000	0.000	80	482	7876	7345	-2.130	Error	Error	1465	6411	0	0	1378	5967	0	0	0	0
1	9	14	""	"iYIL057C"	3620	16770	100	2099	1831	945	74	113	198	83	80	0	1782	1584	841	292	399	561	75	66	0	0	0	0	0	0	0	0	0	0	0	0	0	0	0	0	0	0	0	1.359	1.360	1.214	1.189	2.022	1.238	0.843	0.000	0.000	0.000	0.000	0.000	0.000	0.000	0.000	0.000	0.000	0.000	0.000	0.000	0.000	80	464	3515	3049	0.443	Error	Error	2025	1490	0	0	1757	1292	0	0	0	0
1	10	14	""	"iYIL054W"	3810	16770	100	1129	953	535	72	136	243	76	72	0	800	794	439	298	351	261	71	48	0	0	0	0	0	0	0	0	0	0	0	0	0	0	0	0	0	0	0	2.106	1.776	1.608	1.491	2.655	1.538	0.708	0.000	0.000	0.000	0.000	0.000	0.000	0.000	0.000	0.000	0.000	0.000	0.000	0.000	0.000	80	451	1559	1377	1.074	Error	Error	1057	502	0	0	881	496	0	0	0	0
1	11	14	""	"iYIL050W"	4000	16770	100	1595	1482	848	74	132	316	80	77	0	803	751	367	286	337	333	67	31	0	0	0	0	0	0	0	0	0	0	0	0	0	0	0	0	0	0	0	2.942	3.028	2.852	2.794	2.175	2.873	0.763	0.000	0.000	0.000	0.000	0.000	0.000	0.000	0.000	0.000	0.000	0.000	0.000	0.000	0.000	80	473	2038	1873	1.557	Error	Error	1521	517	0	0	1408	465	0	0	0	0
1	12	14	""	"iYIL034C"	4190	16770	100	2516	2279	1170	79	157	351	90	82	0	1247	1084	568	289	335	223	77	73	0	0	0	0	0	0	0	0	0	0	0	0	0	0	0	0	0	0	0	2.544	2.767	2.391	2.615	1.552	2.473	0.845	0.000	0.000	0.000	0.000	0.000	0.000	0.000	0.000	0.000	0.000	0.000	0.000	0.000	0.000	80	464	3395	2995	1.347	Error	Error	2437	958	0	0	2200	795	0	0	0	0
1	13	14	""	"iYIL030C"	4380	16770	110	1242	1017	508	76	167	357	76	71	0	978	907	417	292	344	238	77	70	0	0	0	0	0	0	0	0	0	0	0	0	0	0	0	0	0	0	0	1.700	1.530	1.550	1.520	2.050	1.353	0.802	0.000	0.000	0.000	0.000	0.000	0.000	0.000	0.000	0.000	0.000	0.000	0.000	0.000	0.000	80	529	1852	1556	0.765	Error	Error	1166	686	0	0	941	615	0	0	0	0
1	14	14	""	"iYIL028W"	4570	16770	110	4039	3887	2600	82	202	568	82	76	0	6309	5892	3822	291	476	1035	81	77	0	0	0	0	0	0	0	0	0	0	0	0	0	0	0	0	0	0	0	0.658	0.679	0.643	0.666	2.373	0.651	0.909	0.000	0.000	0.000	0.000	0.000	0.000	0.000	0.000	0.000	0.000	0.000	0.000	0.000	0.000	80	555	9975	9406	-0.605	Error	Error	3957	6018	0	0	3805	5601	0	0	0	0
1	15	14	""	"iYJL006C"	4800	16770	110	449	469	285	73	136	380	48	12	0	761	680	382	289	416	845	6	0	0	0	0	0	0	0	0	0	0	0	0	0	0	0	0	0	0	0	0	0.797	1.013	0.902	0.840	2.311	0.829	0.722	0.000	0.000	0.000	0.000	0.000	0.000	0.000	0.000	0.000	0.000	0.000	0.000	0.000	0.000	80	501	848	787	-0.328	Error	Error	376	472	0	0	396	391	0	0	0	0
1	16	14	""	"iYJL003W"	4950	16770	100	1045	901	403	71	96	169	85	83	0	4540	3833	1799	296	427	728	85	82	0	0	0	0	0	0	0	0	0	0	0	0	0	0	0	0	0	0	0	0.230	0.235	0.227	0.239	1.754	0.199	0.869	0.000	0.000	0.000	0.000	0.000	0.000	0.000	0.000	0.000	0.000	0.000	0.000	0.000	0.000	80	415	5218	4367	-2.123	Error	Error	974	4244	0	0	830	3537	0	0	0	0
1	17	14	""	"iYJR001W"	5140	16770	100	1656	1471	784	76	105	126	90	85	0	6819	6031	3087	297	515	907	85	81	0	0	0	0	0	0	0	0	0	0	0	0	0	0	0	0	0	0	0	0.242	0.243	0.248	0.229	1.652	0.229	0.917	0.000	0.000	0.000	0.000	0.000	0.000	0.000	0.000	0.000	0.000	0.000	0.000	0.000	0.000	80	466	8102	7129	-2.045	Error	Error	1580	6522	0	0	1395	5734	0	0	0	0
1	18	14	""	"iYJR015W"	5330	16770	100	373	352	160	74	103	121	80	67	0	1935	1723	829	309	484	732	78	60	0	0	0	0	0	0	0	0	0	0	0	0	0	0	0	0	0	0	0	0.184	0.197	0.188	0.209	2.423	0.168	0.793	0.000	0.000	0.000	0.000	0.000	0.000	0.000	0.000	0.000	0.000	0.000	0.000	0.000	0.000	80	474	1925	1692	-2.443	Error	Error	299	1626	0	0	278	1414	0	0	0	0
1	19	14	""	"iYJR021C"	5530	16770	100	433	395	197	75	90	72	82	77	0	578	528	246	300	369	374	26	1	0	0	0	0	0	0	0	0	0	0	0	0	0	0	0	0	0	0	0	1.288	1.404	1.101	1.030	3.246	0.933	0.609	0.000	0.000	0.000	0.000	0.000	0.000	0.000	0.000	0.000	0.000	0.000	0.000	0.000	0.000	80	486	636	548	0.365	Error	Error	358	278	0	0	320	228	0	0	0	0
1	20	14	""	"iYJR031C"	5720	16770	100	1585	1396	580	71	115	196	96	86	0	1358	1254	438	297	340	244	88	83	0	0	0	0	0	0	0	0	0	0	0	0	0	0	0	0	0	0	0	1.427	1.385	1.430	1.367	1.542	1.385	0.854	0.000	0.000	0.000	0.000	0.000	0.000	0.000	0.000	0.000	0.000	0.000	0.000	0.000	0.000	80	460	2575	2282	0.513	Error	Error	1514	1061	0	0	1325	957	0	0	0	0
1	21	14	""	"itS(AGA)J"	5900	16770	110	1733	1539	710	75	161	346	82	81	0	1791	1641	730	300	406	418	82	80	0	0	0	0	0	0	0	0	0	0	0	0	0	0	0	0	0	0	0	1.112	1.092	1.063	1.085	1.535	1.031	0.867	0.000	0.000	0.000	0.000	0.000	0.000	0.000	0.000	0.000	0.000	0.000	0.000	0.000	0.000	80	499	3149	2805	0.153	Error	Error	1658	1491	0	0	1464	1341	0	0	0	0
1	22	14	""	"iYJR050W"	6080	16770	110	1329	1275	822	82	176	361	77	68	0	662	677	342	302	384	358	51	16	0	0	0	0	0	0	0	0	0	0	0	0	0	0	0	0	0	0	0	3.464	3.181	2.898	2.675	2.648	2.348	0.543	0.000	0.000	0.000	0.000	0.000	0.000	0.000	0.000	0.000	0.000	0.000	0.000	0.000	0.000	80	518	1607	1568	1.792	Error	Error	1247	360	0	0	1193	375	0	0	0	0
1	1	15	""	"iYJR052W"	2100	16960	100	888	799	398	66	72	52	92	88	0	998	933	371	273	282	81	88	86	0	0	0	0	0	0	0	0	0	0	0	0	0	0	0	0	0	0	0	1.134	1.111	1.128	1.076	2.067	1.095	0.786	0.000	0.000	0.000	0.000	0.000	0.000	0.000	0.000	0.000	0.000	0.000	0.000	0.000	0.000	80	474	1547	1393	0.181	Error	Error	822	725	0	0	733	660	0	0	0	0
1	2	15	""	"iYJR063W"	2300	16950	120	3107	2796	1789	69	97	175	85	79	0	1622	1394	883	275	320	420	68	60	0	0	0	0	0	0	0	0	0	0	0	0	0	0	0	0	0	0	0	2.255	2.437	2.306	2.429	1.904	2.364	0.868	0.000	0.000	0.000	0.000	0.000	0.000	0.000	0.000	0.000	0.000	0.000	0.000	0.000	0.000	120	581	4385	3846	1.173	Error	Error	3038	1347	0	0	2727	1119	0	0	0	0
1	3	15	""	"iYJR067C"	2490	16950	120	1344	1113	711	71	88	85	87	82	0	2361	2044	1338	273	303	207	77	70	0	0	0	0	0	0	0	0	0	0	0	0	0	0	0	0	0	0	0	0.610	0.588	0.562	0.601	2.038	0.549	0.895	0.000	0.000	0.000	0.000	0.000	0.000	0.000	0.000	0.000	0.000	0.000	0.000	0.000	0.000	120	555	3361	2813	-0.714	Error	Error	1273	2088	0	0	1042	1771	0	0	0	0
1	4	15	""	"iYJR072C"	2660	16950	100	640	610	397	73	88	63	76	75	0	769	675	395	272	286	103	71	66	0	0	0	0	0	0	0	0	0	0	0	0	0	0	0	0	0	0	0	1.141	1.333	1.137	0.869	2.816	1.115	0.737	0.000	0.000	0.000	0.000	0.000	0.000	0.000	0.000	0.000	0.000	0.000	0.000	0.000	0.000	80	429	1064	940	0.190	Error	Error	567	497	0	0	537	403	0	0	0	0
1	5	15	""	"itV(AAC)K2"	2870	16950	120	2058	1763	883	77	98	158	90	88	0	7174	6041	2967	280	303	155	98	94	0	0	0	0	0	0	0	0	0	0	0	0	0	0	0	0	0	0	0	0.287	0.293	0.300	0.301	1.870	0.287	0.911	0.000	0.000	0.000	0.000	0.000	0.000	0.000	0.000	0.000	0.000	0.000	0.000	0.000	0.000	120	568	8875	7447	-1.799	Error	Error	1981	6894	0	0	1686	5761	0	0	0	0
1	6	15	""	"iYKL027W"	3040	16950	110	2811	2342	1540	76	99	128	86	82	0	11431	8827	5869	287	395	552	81	75	0	0	0	0	0	0	0	0	0	0	0	0	0	0	0	0	0	0	0	0.245	0.265	0.272	0.305	2.128	0.252	0.914	0.000	0.000	0.000	0.000	0.000	0.000	0.000	0.000	0.000	0.000	0.000	0.000	0.000	0.000	80	472	13879	10806	-2.027	Error	Error	2735	11144	0	0	2266	8540	0	0	0	0
1	7	15	""	"iYKL023W"	3230	16950	110	1387	1150	723	77	117	164	75	73	0	1672	1436	926	287	411	569	70	58	0	0	0	0	0	0	0	0	0	0	0	0	0	0	0	0	0	0	0	0.946	0.934	0.879	0.821	2.326	0.829	0.805	0.000	0.000	0.000	0.000	0.000	0.000	0.000	0.000	0.000	0.000	0.000	0.000	0.000	0.000	80	493	2695	2222	-0.080	Error	Error	1310	1385	0	0	1073	1149	0	0	0	0
1	8	15	""	"iYKL007W"	3410	16960	110	1110	912	558	76	117	175	77	71	0	1348	1210	751	289	351	309	71	62	0	0	0	0	0	0	0	0	0	0	0	0	0	0	0	0	0	0	0	0.976	0.908	0.869	0.905	2.588	0.741	0.801	0.000	0.000	0.000	0.000	0.000	0.000	0.000	0.000	0.000	0.000	0.000	0.000	0.000	0.000	80	492	2093	1757	-0.034	Error	Error	1034	1059	0	0	836	921	0	0	0	0
1	9	15	""	"iYKL004W"	3590	16950	110	2297	1897	1046	79	158	374	82	76	0	11140	8935	5251	297	644	1775	82	73	0	0	0	0	0	0	0	0	0	0	0	0	0	0	0	0	0	0	0	0.205	0.210	0.207	0.211	1.796	0.196	0.919	0.000	0.000	0.000	0.000	0.000	0.000	0.000	0.000	0.000	0.000	0.000	0.000	0.000	0.000	80	534	13061	10456	-2.289	Error	Error	2218	10843	0	0	1818	8638	0	0	0	0
1	10	15	""	"iCEN11"	3790	16940	110	1153	1010	605	75	141	365	72	63	0	10379	8342	5187	303	673	1830	75	70	0	0	0	0	0	0	0	0	0	0	0	0	0	0	0	0	0	0	0	0.107	0.116	0.117	0.122	1.991	0.108	0.909	0.000	0.000	0.000	0.000	0.000	0.000	0.000	0.000	0.000	0.000	0.000	0.000	0.000	0.000	80	512	11154	8974	-3.224	Error	Error	1078	10076	0	0	935	8039	0	0	0	0
1	11	15	""	"iYKR015C"	3970	16950	100	4599	3873	2039	72	211	754	80	78	0	3781	3304	1684	292	500	891	81	77	0	0	0	0	0	0	0	0	0	0	0	0	0	0	0	0	0	0	0	1.298	1.262	1.248	1.448	1.932	1.232	0.878	0.000	0.000	0.000	0.000	0.000	0.000	0.000	0.000	0.000	0.000	0.000	0.000	0.000	0.000	80	454	8016	6813	0.376	Error	Error	4527	3489	0	0	3801	3012	0	0	0	0
1	12	15	""	"iYKR019C"	4160	16950	100	1995	1677	855	75	246	778	75	66	0	937	869	377	286	454	768	37	0	0	0	0	0	0	0	0	0	0	0	0	0	0	0	0	0	0	0	0	2.949	2.748	2.598	2.452	2.364	2.672	0.807	0.000	0.000	0.000	0.000	0.000	0.000	0.000	0.000	0.000	0.000	0.000	0.000	0.000	0.000	80	464	2571	2185	1.560	Error	Error	1920	651	0	0	1602	583	0	0	0	0
1	13	15	""	"iYKR023W"	4350	16950	110	821	746	562	71	117	242	65	56	0	2889	2289	1724	283	339	300	65	61	0	0	0	0	0	0	0	0	0	0	0	0	0	0	0	0	0	0	0	0.288	0.336	0.329	0.361	2.561	0.300	0.860	0.000	0.000	0.000	0.000	0.000	0.000	0.000	0.000	0.000	0.000	0.000	0.000	0.000	0.000	80	503	3356	2681	-1.797	Error	Error	750	2606	0	0	675	2006	0	0	0	0
1	14	15	""	"iYKRCdelta11"	4520	16950	110	2554	2706	2242	74	161	414	86	75	0	1482	1405	938	283	359	348	70	66	0	0	0	0	0	0	0	0	0	0	0	0	0	0	0	0	0	0	0	2.068	2.346	2.107	2.300	2.637	2.375	0.700	0.000	0.000	0.000	0.000	0.000	0.000	0.000	0.000	0.000	0.000	0.000	0.000	0.000	0.000	80	529	3679	3754	1.049	Error	Error	2480	1199	0	0	2632	1122	0	0	0	0
1	15	15	""	"iYKR042W"	4740	16950	110	917	857	489	70	133	365	75	60	0	3094	2672	1474	279	339	292	85	78	0	0	0	0	0	0	0	0	0	0	0	0	0	0	0	0	0	0	0	0.301	0.329	0.318	0.330	2.058	0.307	0.864	0.000	0.000	0.000	0.000	0.000	0.000	0.000	0.000	0.000	0.000	0.000	0.000	0.000	0.000	80	551	3662	3180	-1.733	Error	Error	847	2815	0	0	787	2393	0	0	0	0
1	16	15	""	"iYKR046C"	4920	16950	110	866	755	373	68	91	125	83	80	0	865	792	346	272	329	299	76	48	0	0	0	0	0	0	0	0	0	0	0	0	0	0	0	0	0	0	0	1.346	1.321	1.299	1.216	2.003	1.055	0.594	0.000	0.000	0.000	0.000	0.000	0.000	0.000	0.000	0.000	0.000	0.000	0.000	0.000	0.000	80	498	1391	1207	0.428	Error	Error	798	593	0	0	687	520	0	0	0	0
1	17	15	""	"iYLR167W"	5100	16950	100	471	432	208	72	104	143	78	71	0	993	884	468	281	331	209	76	68	0	0	0	0	0	0	0	0	0	0	0	0	0	0	0	0	0	0	0	0.560	0.597	0.569	0.529	1.828	0.499	0.773	0.000	0.000	0.000	0.000	0.000	0.000	0.000	0.000	0.000	0.000	0.000	0.000	0.000	0.000	80	458	1111	963	-0.835	Error	Error	399	712	0	0	360	603	0	0	0	0
1	18	15	""	"iYLR173W"	5290	16950	100	1376	1173	584	76	132	236	87	80	0	915	846	396	293	342	211	80	67	0	0	0	0	0	0	0	0	0	0	0	0	0	0	0	0	0	0	0	2.090	1.984	1.796	1.831	1.971	1.796	0.802	0.000	0.000	0.000	0.000	0.000	0.000	0.000	0.000	0.000	0.000	0.000	0.000	0.000	0.000	80	477	1922	1650	1.064	Error	Error	1300	622	0	0	1097	553	0	0	0	0
1	19	15	""	"iYLR177W"	5480	16950	100	638	602	333	71	124	231	76	62	0	1969	1740	1028	288	351	297	81	76	0	0	0	0	0	0	0	0	0	0	0	0	0	0	0	0	0	0	0	0.337	0.366	0.334	0.345	1.683	0.324	0.856	0.000	0.000	0.000	0.000	0.000	0.000	0.000	0.000	0.000	0.000	0.000	0.000	0.000	0.000	80	480	2248	1983	-1.568	Error	Error	567	1681	0	0	531	1452	0	0	0	0
1	20	15	""	"iYLR193C"	5670	16950	100	1132	958	499	70	118	199	81	76	0	755	709	311	292	352	288	76	30	0	0	0	0	0	0	0	0	0	0	0	0	0	0	0	0	0	0	0	2.294	2.129	2.091	2.115	1.730	1.988	0.719	0.000	0.000	0.000	0.000	0.000	0.000	0.000	0.000	0.000	0.000	0.000	0.000	0.000	0.000	80	460	1525	1305	1.198	Error	Error	1062	463	0	0	888	417	0	0	0	0
1	21	15	""	"iYLR198C"	5850	16950	100	457	410	208	74	128	200	73	46	0	1876	1579	812	306	392	358	80	75	0	0	0	0	0	0	0	0	0	0	0	0	0	0	0	0	0	0	0	0.244	0.264	0.243	0.243	1.759	0.225	0.729	0.000	0.000	0.000	0.000	0.000	0.000	0.000	0.000	0.000	0.000	0.000	0.000	0.000	0.000	80	479	1953	1609	-2.035	Error	Error	383	1570	0	0	336	1273	0	0	0	0
1	22	15	""	"iYLR204W"	6060	16950	120	573	538	293	76	109	187	73	62	0	485	468	196	291	364	347	18	0	0	0	0	0	0	0	0	0	0	0	0	0	0	0	0	0	0	0	0	2.562	2.610	2.252	2.366	2.108	2.032	0.500	0.000	0.000	0.000	0.000	0.000	0.000	0.000	0.000	0.000	0.000	0.000	0.000	0.000	0.000	120	654	691	639	1.357	Error	Error	497	194	0	0	462	177	0	0	0	0
1	1	16	""	"iYLR221C"	2090	17140	110	2523	2210	1004	68	82	87	100	100	0	3488	3343	2204	272	295	117	100	98	0	0	0	0	0	0	0	0	0	0	0	0	0	0	0	0	0	0	0	0.763	0.697	0.783	0.772	1.522	0.481	0.663	0.000	0.000	0.000	0.000	0.000	0.000	0.000	0.000	0.000	0.000	0.000	0.000	0.000	0.000	80	500	5671	5213	-0.390	Error	Error	2455	3216	0	0	2142	3071	0	0	0	0
1	2	16	""	"iYLR225C"	2250	17140	110	1953	1669	950	70	121	282	80	78	0	1651	1383	857	281	332	256	71	68	0	0	0	0	0	0	0	0	0	0	0	0	0	0	0	0	0	0	0	1.374	1.451	1.320	1.481	2.550	1.353	0.838	0.000	0.000	0.000	0.000	0.000	0.000	0.000	0.000	0.000	0.000	0.000	0.000	0.000	0.000	80	493	3253	2701	0.459	Error	Error	1883	1370	0	0	1599	1102	0	0	0	0
1	3	16	""	"iYLRWdelta11"	2430	17140	90	836	715	409	78	158	312	69	61	0	1220	1102	632	292	388	350	75	61	0	0	0	0	0	0	0	0	0	0	0	0	0	0	0	0	0	0	0	0.817	0.786	0.693	0.663	2.408	0.644	0.808	0.000	0.000	0.000	0.000	0.000	0.000	0.000	0.000	0.000	0.000	0.000	0.000	0.000	0.000	52	399	1686	1447	-0.292	Error	Error	758	928	0	0	637	810	0	0	0	0
1	4	16	""	"iYLR244C"	2640	17140	100	691	605	342	73	108	148	75	72	0	1071	871	484	277	332	244	72	68	0	0	0	0	0	0	0	0	0	0	0	0	0	0	0	0	0	0	0	0.778	0.896	0.769	0.684	2.129	0.787	0.782	0.000	0.000	0.000	0.000	0.000	0.000	0.000	0.000	0.000	0.000	0.000	0.000	0.000	0.000	80	497	1412	1126	-0.362	Error	Error	618	794	0	0	532	594	0	0	0	0
1	5	16	""	"iYLR247C"	2820	17140	100	4749	4167	2403	77	166	524	81	80	0	1791	1518	842	283	334	256	78	77	0	0	0	0	0	0	0	0	0	0	0	0	0	0	0	0	0	0	0	3.098	3.312	3.154	2.998	2.019	3.348	0.854	0.000	0.000	0.000	0.000	0.000	0.000	0.000	0.000	0.000	0.000	0.000	0.000	0.000	0.000	80	470	6180	5325	1.631	Error	Error	4672	1508	0	0	4090	1235	0	0	0	0
1	6	16	""	"iYLR252W"	3010	17140	100	1922	1718	943	79	212	603	80	72	0	1704	1426	857	281	367	370	71	68	0	0	0	0	0	0	0	0	0	0	0	0	0	0	0	0	0	0	0	1.295	1.431	1.369	1.529	1.845	1.263	0.865	0.000	0.000	0.000	0.000	0.000	0.000	0.000	0.000	0.000	0.000	0.000	0.000	0.000	0.000	80	495	3266	2784	0.373	Error	Error	1843	1423	0	0	1639	1145	0	0	0	0
1	7	16	""	"iYML046W"	3210	17130	110	780	686	412	78	154	344	68	52	0	1105	950	601	281	363	349	63	56	0	0	0	0	0	0	0	0	0	0	0	0	0	0	0	0	0	0	0	0.852	0.909	0.799	0.744	2.474	0.734	0.777	0.000	0.000	0.000	0.000	0.000	0.000	0.000	0.000	0.000	0.000	0.000	0.000	0.000	0.000	80	548	1526	1277	-0.231	Error	Error	702	824	0	0	608	669	0	0	0	0
1	8	16	""	"iYML042W"	3400	17140	110	1172	938	526	77	110	132	81	78	0	1155	1019	584	276	322	208	77	71	0	0	0	0	0	0	0	0	0	0	0	0	0	0	0	0	0	0	0	1.246	1.159	1.051	0.791	3.231	1.035	0.821	0.000	0.000	0.000	0.000	0.000	0.000	0.000	0.000	0.000	0.000	0.000	0.000	0.000	0.000	80	559	1974	1604	0.317	Error	Error	1095	879	0	0	861	743	0	0	0	0
1	9	16	""	"iYML038C"	3650	17150	110	190	216	118	79	122	251	20	0	0	445	448	197	278	336	465	8	0	0	0	0	0	0	0	0	0	0	0	0	0	0	0	0	0	0	0	0	0.665	0.806	0.629	0.600	2.909	0.643	0.449	0.000	0.000	0.000	0.000	0.000	0.000	0.000	0.000	0.000	0.000	0.000	0.000	0.000	0.000	80	494	278	307	-0.589	Error	Error	111	167	0	0	137	170	0	0	0	0
1	10	16	""	"iYML021C"	3780	17140	110	3100	2652	1670	81	144	360	81	76	0	2049	1674	1120	287	337	363	67	66	0	0	0	0	0	0	0	0	0	0	0	0	0	0	0	0	0	0	0	1.713	1.854	1.756	1.843	2.196	1.706	0.906	0.000	0.000	0.000	0.000	0.000	0.000	0.000	0.000	0.000	0.000	0.000	0.000	0.000	0.000	80	474	4781	3958	0.777	Error	Error	3019	1762	0	0	2571	1387	0	0	0	0
1	11	16	""	"iYML017W"	3980	17140	110	669	651	448	80	130	309	71	47	0	2196	2077	1492	289	356	409	78	73	0	0	0	0	0	0	0	0	0	0	0	0	0	0	0	0	0	0	0	0.309	0.319	0.293	0.276	1.722	0.263	0.759	0.000	0.000	0.000	0.000	0.000	0.000	0.000	0.000	0.000	0.000	0.000	0.000	0.000	0.000	80	549	2496	2359	-1.695	Error	Error	589	1907	0	0	571	1788	0	0	0	0
1	12	16	""	"iYML013C-A"	4170	17140	110	1635	1353	784	78	119	197	82	77	0	889	813	498	288	334	279	67	56	0	0	0	0	0	0	0	0	0	0	0	0	0	0	0	0	0	0	0	2.591	2.429	2.411	2.206	2.217	2.151	0.764	0.000	0.000	0.000	0.000	0.000	0.000	0.000	0.000	0.000	0.000	0.000	0.000	0.000	0.000	80	550	2158	1800	1.373	Error	Error	1557	601	0	0	1275	525	0	0	0	0
1	13	16	""	"iYMR002W"	4370	17150	110	874	819	542	72	120	210	73	66	0	1421	1298	868	289	320	171	72	67	0	0	0	0	0	0	0	0	0	0	0	0	0	0	0	0	0	0	0	0.708	0.740	0.717	0.681	2.188	0.650	0.837	0.000	0.000	0.000	0.000	0.000	0.000	0.000	0.000	0.000	0.000	0.000	0.000	0.000	0.000	80	559	1934	1756	-0.497	Error	Error	802	1132	0	0	747	1009	0	0	0	0
1	14	16	""	"iYMR006C"	4570	17140	110	1202	1005	655	70	93	127	78	72	0	5738	4213	2885	288	347	253	75	71	0	0	0	0	0	0	0	0	0	0	0	0	0	0	0	0	0	0	0	0.208	0.238	0.250	0.276	2.089	0.217	0.880	0.000	0.000	0.000	0.000	0.000	0.000	0.000	0.000	0.000	0.000	0.000	0.000	0.000	0.000	80	554	6582	4860	-2.267	Error	Error	1132	5450	0	0	935	3925	0	0	0	0
1	15	16	""	"iYMR010W-0"	4760	17150	110	1742	1724	784	69	101	265	92	88	0	1958	1819	835	282	353	332	86	85	0	0	0	0	0	0	0	0	0	0	0	0	0	0	0	0	0	0	0	0.998	1.077	1.062	1.159	1.738	1.052	0.827	0.000	0.000	0.000	0.000	0.000	0.000	0.000	0.000	0.000	0.000	0.000	0.000	0.000	0.000	80	527	3349	3192	-0.003	Error	Error	1673	1676	0	0	1655	1537	0	0	0	0
1	16	16	""	"iYMR021C"	4940	17150	110	1128	1055	461	67	90	115	91	91	0	2227	2064	834	275	325	271	91	90	0	0	0	0	0	0	0	0	0	0	0	0	0	0	0	0	0	0	0	0.544	0.552	0.546	0.522	1.634	0.517	0.886	0.000	0.000	0.000	0.000	0.000	0.000	0.000	0.000	0.000	0.000	0.000	0.000	0.000	0.000	80	512	3013	2777	-0.880	Error	Error	1061	1952	0	0	988	1789	0	0	0	0
1	17	16	""	"iYMR024W"	5130	17140	110	1294	1144	596	70	100	134	91	82	0	1197	1062	531	283	333	252	78	73	0	0	0	0	0	0	0	0	0	0	0	0	0	0	0	0	0	0	0	1.339	1.379	1.278	1.239	2.115	1.236	0.803	0.000	0.000	0.000	0.000	0.000	0.000	0.000	0.000	0.000	0.000	0.000	0.000	0.000	0.000	80	540	2138	1853	0.421	Error	Error	1224	914	0	0	1074	779	0	0	0	0
1	18	16	""	"iYMR029C"	5320	17150	110	2766	2509	1346	73	153	392	87	82	0	3313	3036	1715	280	401	620	83	78	0	0	0	0	0	0	0	0	0	0	0	0	0	0	0	0	0	0	0	0.888	0.884	0.851	0.885	2.291	0.804	0.869	0.000	0.000	0.000	0.000	0.000	0.000	0.000	0.000	0.000	0.000	0.000	0.000	0.000	0.000	80	540	5726	5192	-0.172	Error	Error	2693	3033	0	0	2436	2756	0	0	0	0
1	19	16	""	"iYMR312W"	5510	17150	110	726	619	297	71	156	407	68	16	0	717	672	284	285	407	630	20	0	0	0	0	0	0	0	0	0	0	0	0	0	0	0	0	0	0	0	0	1.516	1.416	1.330	1.258	2.142	0.736	0.594	0.000	0.000	0.000	0.000	0.000	0.000	0.000	0.000	0.000	0.000	0.000	0.000	0.000	0.000	80	516	1087	935	0.600	Error	Error	655	432	0	0	548	387	0	0	0	0
1	20	16	""	"iYMR316C-A"	5690	17140	110	1482	1461	915	74	145	281	77	75	0	2675	2684	1524	289	418	564	81	78	0	0	0	0	0	0	0	0	0	0	0	0	0	0	0	0	0	0	0	0.590	0.579	0.548	0.564	1.833	0.550	0.865	0.000	0.000	0.000	0.000	0.000	0.000	0.000	0.000	0.000	0.000	0.000	0.000	0.000	0.000	80	537	3794	3782	-0.761	Error	Error	1408	2386	0	0	1387	2395	0	0	0	0
1	21	16	""	"iYMR319C-1"	5890	17150	110	3171	2856	1700	76	236	628	85	77	0	2080	1862	958	303	480	646	80	66	0	0	0	0	0	0	0	0	0	0	0	0	0	0	0	0	0	0	0	1.742	1.783	1.722	1.750	1.470	1.815	0.832	0.000	0.000	0.000	0.000	0.000	0.000	0.000	0.000	0.000	0.000	0.000	0.000	0.000	0.000	80	562	4872	4339	0.800	Error	Error	3095	1777	0	0	2780	1559	0	0	0	0
1	22	16	""	"iYNL331C"	6090	17140	110	2010	1731	1124	73	180	527	76	66	0	1729	1566	969	291	373	375	73	68	0	0	0	0	0	0	0	0	0	0	0	0	0	0	0	0	0	0	0	1.347	1.300	1.285	1.137	2.145	1.289	0.821	0.000	0.000	0.000	0.000	0.000	0.000	0.000	0.000	0.000	0.000	0.000	0.000	0.000	0.000	80	565	3375	2933	0.430	Error	Error	1937	1438	0	0	1658	1275	0	0	0	0
1	1	17	""	"iYNL327W"	2090	17330	110	619	538	313	68	78	62	82	75	0	1335	1195	707	271	297	169	72	71	0	0	0	0	0	0	0	0	0	0	0	0	0	0	0	0	0	0	0	0.518	0.509	0.482	0.480	2.353	0.434	0.829	0.000	0.000	0.000	0.000	0.000	0.000	0.000	0.000	0.000	0.000	0.000	0.000	0.000	0.000	80	562	1615	1394	-0.949	Error	Error	551	1064	0	0	470	924	0	0	0	0
1	2	17	""	"iYNL322C"	2290	17340	110	2816	2312	1498	73	104	148	81	80	0	1503	1274	813	283	318	212	73	70	0	0	0	0	0	0	0	0	0	0	0	0	0	0	0	0	0	0	0	2.248	2.259	2.075	1.800	2.715	2.150	0.866	0.000	0.000	0.000	0.000	0.000	0.000	0.000	0.000	0.000	0.000	0.000	0.000	0.000	0.000	80	550	3963	3230	1.169	Error	Error	2743	1220	0	0	2239	991	0	0	0	0
1	3	17	""	"iYNL302C"	2490	17330	110	2893	2519	1499	77	127	271	85	81	0	1437	1291	749	282	319	221	78	72	0	0	0	0	0	0	0	0	0	0	0	0	0	0	0	0	0	0	0	2.438	2.420	2.327	2.287	1.768	2.331	0.863	0.000	0.000	0.000	0.000	0.000	0.000	0.000	0.000	0.000	0.000	0.000	0.000	0.000	0.000	80	566	3971	3451	1.286	Error	Error	2816	1155	0	0	2442	1009	0	0	0	0
1	4	17	""	"iYNL298W"	2680	17340	110	1689	1398	894	75	122	273	81	71	0	6211	5185	3402	292	385	494	81	73	0	0	0	0	0	0	0	0	0	0	0	0	0	0	0	0	0	0	0	0.273	0.270	0.271	0.296	1.769	0.249	0.887	0.000	0.000	0.000	0.000	0.000	0.000	0.000	0.000	0.000	0.000	0.000	0.000	0.000	0.000	80	530	7533	6216	-1.875	Error	Error	1614	5919	0	0	1323	4893	0	0	0	0
1	5	17	""	"iYNL293W"	2870	17340	110	1795	1443	884	76	122	302	76	72	0	1654	1388	813	289	394	569	68	60	0	0	0	0	0	0	0	0	0	0	0	0	0	0	0	0	0	0	0	1.259	1.244	1.227	1.026	2.665	1.169	0.832	0.000	0.000	0.000	0.000	0.000	0.000	0.000	0.000	0.000	0.000	0.000	0.000	0.000	0.000	80	532	3084	2466	0.333	Error	Error	1719	1365	0	0	1367	1099	0	0	0	0
1	6	17	""	"iYNL284C"	3050	17340	110	3060	2541	1341	76	161	422	85	78	0	2594	2252	1257	282	368	457	80	76	0	0	0	0	0	0	0	0	0	0	0	0	0	0	0	0	0	0	0	1.291	1.251	1.170	1.152	2.142	1.191	0.860	0.000	0.000	0.000	0.000	0.000	0.000	0.000	0.000	0.000	0.000	0.000	0.000	0.000	0.000	80	530	5296	4435	0.368	Error	Error	2984	2312	0	0	2465	1970	0	0	0	0
1	7	17	""	"iYNL281W"	3240	17340	110	1366	1138	668	74	167	402	75	63	0	2727	2374	1453	284	435	565	75	68	0	0	0	0	0	0	0	0	0	0	0	0	0	0	0	0	0	0	0	0.529	0.509	0.483	0.517	1.731	0.456	0.873	0.000	0.000	0.000	0.000	0.000	0.000	0.000	0.000	0.000	0.000	0.000	0.000	0.000	0.000	80	537	3735	3154	-0.919	Error	Error	1292	2443	0	0	1064	2090	0	0	0	0
1	8	17	""	"iYNL276C"	3420	17340	110	1724	1512	915	75	184	396	83	70	0	1385	1201	746	287	434	519	67	55	0	0	0	0	0	0	0	0	0	0	0	0	0	0	0	0	0	0	0	1.502	1.572	1.422	1.367	2.883	1.155	0.645	0.000	0.000	0.000	0.000	0.000	0.000	0.000	0.000	0.000	0.000	0.000	0.000	0.000	0.000	80	527	2747	2351	0.587	Error	Error	1649	1098	0	0	1437	914	0	0	0	0
1	9	17	""	"iYNR042W"	3610	17330	110	1349	1108	653	84	205	394	76	66	0	727	645	377	287	361	298	61	33	0	0	0	0	0	0	0	0	0	0	0	0	0	0	0	0	0	0	0	2.875	2.860	2.319	1.560	3.364	2.052	0.689	0.000	0.000	0.000	0.000	0.000	0.000	0.000	0.000	0.000	0.000	0.000	0.000	0.000	0.000	80	524	1705	1382	1.524	Error	Error	1265	440	0	0	1024	358	0	0	0	0
1	10	17	""	"iYNR046W"	3810	17330	110	1629	1520	970	89	176	267	83	71	0	857	862	526	293	329	175	71	65	0	0	0	0	0	0	0	0	0	0	0	0	0	0	0	0	0	0	0	2.730	2.515	2.186	1.994	2.992	2.211	0.764	0.000	0.000	0.000	0.000	0.000	0.000	0.000	0.000	0.000	0.000	0.000	0.000	0.000	0.000	80	538	2104	2000	1.449	Error	Error	1540	564	0	0	1431	569	0	0	0	0
1	11	17	""	"iYNR050C"	4000	17340	110	2224	2104	1378	86	155	286	83	77	0	2179	2090	1404	292	366	379	77	71	0	0	0	0	0	0	0	0	0	0	0	0	0	0	0	0	0	0	0	1.133	1.122	1.061	1.088	2.150	1.028	0.902	0.000	0.000	0.000	0.000	0.000	0.000	0.000	0.000	0.000	0.000	0.000	0.000	0.000	0.000	80	549	4025	3816	0.180	Error	Error	2138	1887	0	0	2018	1798	0	0	0	0
1	12	17	""	"iYNR063W"	4200	17340	110	1926	1621	1002	80	163	324	82	76	0	3898	3469	2068	300	435	591	80	76	0	0	0	0	0	0	0	0	0	0	0	0	0	0	0	0	0	0	0	0.513	0.486	0.482	0.469	1.750	0.467	0.866	0.000	0.000	0.000	0.000	0.000	0.000	0.000	0.000	0.000	0.000	0.000	0.000	0.000	0.000	80	508	5444	4710	-0.963	Error	Error	1846	3598	0	0	1541	3169	0	0	0	0
1	13	17	""	"iYNR068C"	4370	17340	100	1235	1055	630	80	175	311	77	67	0	925	886	568	295	432	567	53	23	0	0	0	0	0	0	0	0	0	0	0	0	0	0	0	0	0	0	0	1.833	1.650	1.412	1.507	2.785	0.903	0.494	0.000	0.000	0.000	0.000	0.000	0.000	0.000	0.000	0.000	0.000	0.000	0.000	0.000	0.000	80	458	1785	1566	0.874	Error	Error	1155	630	0	0	975	591	0	0	0	0
1	14	17	""	"iYNR071C"	4570	17340	110	1585	1670	1061	74	171	341	81	78	0	3268	3128	2183	288	406	520	75	72	0	0	0	0	0	0	0	0	0	0	0	0	0	0	0	0	0	0	0	0.507	0.562	0.506	0.635	2.591	0.490	0.801	0.000	0.000	0.000	0.000	0.000	0.000	0.000	0.000	0.000	0.000	0.000	0.000	0.000	0.000	80	548	4491	4436	-0.980	Error	Error	1511	2980	0	0	1596	2840	0	0	0	0
1	15	17	""	"iYOL160W-1"	4760	17340	110	3119	2874	1737	74	201	571	82	76	0	2426	2407	1509	283	428	634	77	70	0	0	0	0	0	0	0	0	0	0	0	0	0	0	0	0	0	0	0	1.421	1.318	1.270	1.274	1.819	1.268	0.797	0.000	0.000	0.000	0.000	0.000	0.000	0.000	0.000	0.000	0.000	0.000	0.000	0.000	0.000	80	536	5188	4924	0.507	Error	Error	3045	2143	0	0	2800	2124	0	0	0	0
1	16	17	""	"iYOL157C"	4970	17340	120	4975	4225	2938	70	168	518	86	80	0	4745	4138	3055	276	367	444	75	72	0	0	0	0	0	0	0	0	0	0	0	0	0	0	0	0	0	0	0	1.098	1.076	1.034	1.390	2.686	1.030	0.885	0.000	0.000	0.000	0.000	0.000	0.000	0.000	0.000	0.000	0.000	0.000	0.000	0.000	0.000	120	570	9374	8017	0.134	Error	Error	4905	4469	0	0	4155	3862	0	0	0	0
1	17	17	""	"iYOL155C-1"	5130	17340	110	610	719	594	67	103	174	83	66	0	831	904	698	269	312	230	71	61	0	0	0	0	0	0	0	0	0	0	0	0	0	0	0	0	0	0	0	0.966	1.027	0.908	0.906	2.707	0.857	0.768	0.000	0.000	0.000	0.000	0.000	0.000	0.000	0.000	0.000	0.000	0.000	0.000	0.000	0.000	80	486	1105	1287	-0.050	Error	Error	543	562	0	0	652	635	0	0	0	0
1	18	17	""	"iYOL138C"	5330	17340	100	1237	1048	558	73	137	251	83	75	0	737	644	350	269	308	213	66	55	0	0	0	0	0	0	0	0	0	0	0	0	0	0	0	0	0	0	0	2.487	2.600	2.343	2.256	2.780	2.124	0.728	0.000	0.000	0.000	0.000	0.000	0.000	0.000	0.000	0.000	0.000	0.000	0.000	0.000	0.000	80	478	1632	1350	1.315	Error	Error	1164	468	0	0	975	375	0	0	0	0
1	19	17	""	"iYOL133W"	5510	17330	110	1061	1059	779	74	172	342	73	57	0	626	641	394	277	315	174	66	51	0	0	0	0	0	0	0	0	0	0	0	0	0	0	0	0	0	0	0	2.828	2.706	2.340	2.178	2.532	2.376	0.765	0.000	0.000	0.000	0.000	0.000	0.000	0.000	0.000	0.000	0.000	0.000	0.000	0.000	0.000	80	525	1336	1349	1.500	Error	Error	987	349	0	0	985	364	0	0	0	0
1	20	17	""	"iYOL129W"	5710	17340	110	856	757	385	74	161	309	78	63	0	1527	1287	722	290	382	355	75	68	0	0	0	0	0	0	0	0	0	0	0	0	0	0	0	0	0	0	0	0.632	0.685	0.624	0.666	2.414	0.557	0.822	0.000	0.000	0.000	0.000	0.000	0.000	0.000	0.000	0.000	0.000	0.000	0.000	0.000	0.000	80	537	2019	1680	-0.662	Error	Error	782	1237	0	0	683	997	0	0	0	0
1	21	17	""	"iYOR161C"	5890	17340	110	2334	2080	1050	76	217	521	82	78	0	2309	1974	990	311	468	565	76	72	0	0	0	0	0	0	0	0	0	0	0	0	0	0	0	0	0	0	0	1.130	1.205	1.144	1.316	2.049	1.121	0.860	0.000	0.000	0.000	0.000	0.000	0.000	0.000	0.000	0.000	0.000	0.000	0.000	0.000	0.000	80	526	4256	3667	0.176	Error	Error	2258	1998	0	0	2004	1663	0	0	0	0
1	22	17	""	"iYOR165W"	6080	17340	110	634	528	275	81	186	469	62	0	0	1158	1078	565	315	427	487	75	38	0	0	0	0	0	0	0	0	0	0	0	0	0	0	0	0	0	0	0	0.656	0.586	0.555	0.475	2.673	0.574	0.789	0.000	0.000	0.000	0.000	0.000	0.000	0.000	0.000	0.000	0.000	0.000	0.000	0.000	0.000	80	570	1396	1210	-0.608	Error	Error	553	843	0	0	447	763	0	0	0	0
1	1	18	""	"iYOR172W"	2100	17520	110	3583	3465	3082	69	156	465	71	65	0	1439	2412	2277	280	359	420	58	56	0	0	0	0	0	0	0	0	0	0	0	0	0	0	0	0	0	0	0	3.032	1.593	1.508	1.524	2.995	1.448	0.890	0.000	0.000	0.000	0.000	0.000	0.000	0.000	0.000	0.000	0.000	0.000	0.000	0.000	0.000	80	560	4673	5528	1.600	Error	Error	3514	1159	0	0	3396	2132	0	0	0	0
1	2	18	""	"iYOR183W"	2290	17520	110	823	746	498	82	193	493	58	38	0	662	588	362	292	383	443	42	5	0	0	0	0	0	0	0	0	0	0	0	0	0	0	0	0	0	0	0	2.003	2.243	1.826	1.320	3.395	1.270	0.608	0.000	0.000	0.000	0.000	0.000	0.000	0.000	0.000	0.000	0.000	0.000	0.000	0.000	0.000	80	511	1111	960	1.002	Error	Error	741	370	0	0	664	296	0	0	0	0
1	3	18	""	"iYOR187W"	2490	17530	110	2703	2170	1299	87	207	758	76	62	0	1143	1065	646	295	396	1032	42	0	0	0	0	0	0	0	0	0	0	0	0	0	0	0	0	0	0	0	0	3.085	2.705	2.435	2.227	2.710	2.403	0.840	0.000	0.000	0.000	0.000	0.000	0.000	0.000	0.000	0.000	0.000	0.000	0.000	0.000	0.000	80	548	3464	2853	1.625	Error	Error	2616	848	0	0	2083	770	0	0	0	0
1	4	18	""	"iYOR191W"	2680	17520	110	6012	4596	2984	81	242	707	77	72	0	11163	8630	6113	303	594	1646	70	67	0	0	0	0	0	0	0	0	0	0	0	0	0	0	0	0	0	0	0	0.546	0.542	0.534	0.646	2.447	0.501	0.928	0.000	0.000	0.000	0.000	0.000	0.000	0.000	0.000	0.000	0.000	0.000	0.000	0.000	0.000	80	499	16791	12842	-0.873	Error	Error	5931	10860	0	0	4515	8327	0	0	0	0
1	5	18	""	"iYOR208W"	2870	17530	110	1769	1362	833	78	215	658	67	63	0	4962	3884	2471	306	727	1798	68	63	0	0	0	0	0	0	0	0	0	0	0	0	0	0	0	0	0	0	0	0.363	0.359	0.368	0.359	1.822	0.319	0.895	0.000	0.000	0.000	0.000	0.000	0.000	0.000	0.000	0.000	0.000	0.000	0.000	0.000	0.000	80	497	6347	4862	-1.461	Error	Error	1691	4656	0	0	1284	3578	0	0	0	0
1	6	18	""	"iYOR212W"	3060	17530	110	2294	1755	1085	79	186	382	76	71	0	4252	3372	2346	296	604	1065	67	61	0	0	0	0	0	0	0	0	0	0	0	0	0	0	0	0	0	0	0	0.560	0.545	0.519	0.563	2.205	0.485	0.889	0.000	0.000	0.000	0.000	0.000	0.000	0.000	0.000	0.000	0.000	0.000	0.000	0.000	0.000	80	539	6171	4752	-0.837	Error	Error	2215	3956	0	0	1676	3076	0	0	0	0
1	7	18	""	"iYOR216C"	3250	17530	100	1719	1459	873	78	186	370	76	72	0	1072	914	548	291	490	818	47	1	0	0	0	0	0	0	0	0	0	0	0	0	0	0	0	0	0	0	0	2.101	2.217	1.964	1.516	3.102	1.967	0.682	0.000	0.000	0.000	0.000	0.000	0.000	0.000	0.000	0.000	0.000	0.000	0.000	0.000	0.000	80	462	2422	2004	1.071	Error	Error	1641	781	0	0	1381	623	0	0	0	0
1	8	18	""	"iYOR234C"	3430	17530	100	1881	1695	1010	86	190	399	77	75	0	1847	1548	1019	296	382	391	70	65	0	0	0	0	0	0	0	0	0	0	0	0	0	0	0	0	0	0	0	1.157	1.285	1.169	1.068	3.189	1.105	0.877	0.000	0.000	0.000	0.000	0.000	0.000	0.000	0.000	0.000	0.000	0.000	0.000	0.000	0.000	80	484	3346	2861	0.211	Error	Error	1795	1551	0	0	1609	1252	0	0	0	0
1	9	18	""	"iYOR238W"	3670	17530	150	971	1660	1494	87	201	417	66	51	0	789	898	675	296	378	403	51	39	0	0	0	0	0	0	0	0	0	0	0	0	0	0	0	0	0	0	0	1.793	2.613	2.461	2.033	2.705	2.533	0.852	0.000	0.000	0.000	0.000	0.000	0.000	0.000	0.000	0.000	0.000	0.000	0.000	0.000	0.000	156	763	1377	2175	0.842	Error	Error	884	493	0	0	1573	602	0	0	0	0
1	10	18	""	"iYOR243C"	3810	17520	110	1854	1553	895	82	221	457	76	68	0	1972	1606	997	298	433	485	72	62	0	0	0	0	0	0	0	0	0	0	0	0	0	0	0	0	0	0	0	1.059	1.125	1.049	1.094	2.007	0.988	0.873	0.000	0.000	0.000	0.000	0.000	0.000	0.000	0.000	0.000	0.000	0.000	0.000	0.000	0.000	80	431	3446	2779	0.082	Error	Error	1772	1674	0	0	1471	1308	0	0	0	0
1	11	18	""	"iYPL131W"	4010	17530	110	1457	1315	806	81	220	449	75	68	0	1368	1201	678	305	448	480	72	57	0	0	0	0	0	0	0	0	0	0	0	0	0	0	0	0	0	0	0	1.294	1.377	1.208	1.098	3.039	1.212	0.825	0.000	0.000	0.000	0.000	0.000	0.000	0.000	0.000	0.000	0.000	0.000	0.000	0.000	0.000	80	546	2439	2130	0.372	Error	Error	1376	1063	0	0	1234	896	0	0	0	0
1	12	18	""	"iYPL127C"	4220	17530	120	3002	2601	1809	77	148	321	79	72	0	1183	1135	758	294	359	307	68	61	0	0	0	0	0	0	0	0	0	0	0	0	0	0	0	0	0	0	0	3.290	3.001	2.935	2.876	2.267	2.865	0.850	0.000	0.000	0.000	0.000	0.000	0.000	0.000	0.000	0.000	0.000	0.000	0.000	0.000	0.000	120	585	3814	3365	1.718	Error	Error	2925	889	0	0	2524	841	0	0	0	0
1	13	18	""	"iYPL123C"	4380	17520	90	1225	1065	598	85	206	415	75	65	0	1432	1211	653	300	390	353	75	71	0	0	0	0	0	0	0	0	0	0	0	0	0	0	0	0	0	0	0	1.007	1.076	0.950	0.862	2.002	0.992	0.715	0.000	0.000	0.000	0.000	0.000	0.000	0.000	0.000	0.000	0.000	0.000	0.000	0.000	0.000	52	353	2272	1891	0.010	Error	Error	1140	1132	0	0	980	911	0	0	0	0
1	14	18	""	"iYPL106C"	4570	17530	110	2927	2355	1448	80	182	411	78	76	0	1455	1223	749	288	372	352	70	62	0	0	0	0	0	0	0	0	0	0	0	0	0	0	0	0	0	0	0	2.440	2.433	2.312	2.680	2.303	2.232	0.819	0.000	0.000	0.000	0.000	0.000	0.000	0.000	0.000	0.000	0.000	0.000	0.000	0.000	0.000	80	548	4014	3210	1.287	Error	Error	2847	1167	0	0	2275	935	0	0	0	0
1	15	18	""	"iYPL101W"	4770	17530	110	1171	1017	623	77	178	484	71	57	0	818	748	427	280	343	340	61	37	0	0	0	0	0	0	0	0	0	0	0	0	0	0	0	0	0	0	0	2.033	2.009	1.824	1.731	2.277	1.704	0.743	0.000	0.000	0.000	0.000	0.000	0.000	0.000	0.000	0.000	0.000	0.000	0.000	0.000	0.000	80	526	1632	1408	1.024	Error	Error	1094	538	0	0	940	468	0	0	0	0
1	16	18	""	"iYPL095C"	4950	17530	110	1995	1669	993	76	135	262	80	76	0	2678	2269	1431	277	363	457	75	68	0	0	0	0	0	0	0	0	0	0	0	0	0	0	0	0	0	0	0	0.799	0.800	0.758	0.762	2.920	0.698	0.884	0.000	0.000	0.000	0.000	0.000	0.000	0.000	0.000	0.000	0.000	0.000	0.000	0.000	0.000	80	510	4320	3585	-0.323	Error	Error	1919	2401	0	0	1593	1992	0	0	0	0
1	17	18	""	"iYPL079W"	5140	17530	110	1778	1461	808	74	147	308	80	75	0	4510	3626	2179	280	459	726	78	72	0	0	0	0	0	0	0	0	0	0	0	0	0	0	0	0	0	0	0	0.403	0.415	0.381	0.458	2.309	0.364	0.856	0.000	0.000	0.000	0.000	0.000	0.000	0.000	0.000	0.000	0.000	0.000	0.000	0.000	0.000	80	528	5934	4733	-1.312	Error	Error	1704	4230	0	0	1387	3346	0	0	0	0
1	18	18	""	"iYPL076W-1"	5330	17540	110	3237	2691	1623	77	195	535	83	75	0	1103	980	553	281	431	680	57	7	0	0	0	0	0	0	0	0	0	0	0	0	0	0	0	0	0	0	0	3.844	3.740	3.504	3.560	2.464	3.349	0.586	0.000	0.000	0.000	0.000	0.000	0.000	0.000	0.000	0.000	0.000	0.000	0.000	0.000	0.000	80	537	3982	3313	1.943	Error	Error	3160	822	0	0	2614	699	0	0	0	0
1	19	18	""	"iYPL070W"	5530	17530	110	569	507	283	73	185	530	45	0	0	3050	2643	1467	290	381	442	78	77	0	0	0	0	0	0	0	0	0	0	0	0	0	0	0	0	0	0	0	0.180	0.184	0.176	0.180	1.788	0.167	0.825	0.000	0.000	0.000	0.000	0.000	0.000	0.000	0.000	0.000	0.000	0.000	0.000	0.000	0.000	80	509	3256	2787	-2.476	Error	Error	496	2760	0	0	434	2353	0	0	0	0
1	20	18	""	"iYPL057C"	5690	17530	110	1074	985	582	75	141	259	77	71	0	645	631	292	304	379	395	43	5	0	0	0	0	0	0	0	0	0	0	0	0	0	0	0	0	0	0	0	2.930	2.783	2.595	2.030	3.244	1.424	0.176	0.000	0.000	0.000	0.000	0.000	0.000	0.000	0.000	0.000	0.000	0.000	0.000	0.000	0.000	80	513	1340	1237	1.551	Error	Error	999	341	0	0	910	327	0	0	0	0
1	21	18	""	"iYPL053C"	5900	17540	110	1967	1721	1047	79	179	380	78	73	0	1178	1063	581	309	354	229	76	72	0	0	0	0	0	0	0	0	0	0	0	0	0	0	0	0	0	0	0	2.173	2.178	1.982	1.770	2.493	1.981	0.839	0.000	0.000	0.000	0.000	0.000	0.000	0.000	0.000	0.000	0.000	0.000	0.000	0.000	0.000	80	545	2757	2396	1.119	Error	Error	1888	869	0	0	1642	754	0	0	0	0
1	22	18	""	"iYPL049C"	6090	17530	110	1061	965	627	81	157	337	76	65	0	554	577	302	304	347	219	58	27	0	0	0	0	0	0	0	0	0	0	0	0	0	0	0	0	0	0	0	3.920	3.238	2.787	2.056	3.782	2.466	0.647	0.000	0.000	0.000	0.000	0.000	0.000	0.000	0.000	0.000	0.000	0.000	0.000	0.000	0.000	80	570	1230	1157	1.971	Error	Error	980	250	0	0	884	273	0	0	0	0
1	1	19	""	"YORWdelta19"	2110	17710	100	1084	903	652	74	214	1874	3	0	0	2097	1775	1291	308	364	364	67	60	0	0	0	0	0	0	0	0	0	0	0	0	0	0	0	0	0	0	0	0.565	0.565	0.550	0.543	2.371	0.492	0.869	0.000	0.000	0.000	0.000	0.000	0.000	0.000	0.000	0.000	0.000	0.000	0.000	0.000	0.000	80	510	2799	2296	-0.825	Error	Error	1010	1789	0	0	829	1467	0	0	0	0
1	2	19	""	"TEL15R-5"	2320	17710	130	15469	28260	27689	86	326	1901	70	64	20	5835	15090	15709	298	417	577	76	63	0	0	0	0	0	0	0	0	0	0	0	0	0	0	0	0	0	0	0	2.778	1.905	1.773	1.993	2.501	1.971	0.864	0.000	0.000	0.000	0.000	0.000	0.000	0.000	0.000	0.000	0.000	0.000	0.000	0.000	0.000	120	630	20920	42966	1.474	Error	Error	15383	5537	0	0	28174	14792	0	0	0	0
1	3	19	""	"YPLCtau1"	2480	17720	100	7810	7070	5966	92	722	2261	67	57	0	9739	9354	8220	313	1139	3287	57	55	0	0	0	0	0	0	0	0	0	0	0	0	0	0	0	0	0	0	0	0.819	0.772	0.728	1.022	2.557	0.714	0.870	0.000	0.000	0.000	0.000	0.000	0.000	0.000	0.000	0.000	0.000	0.000	0.000	0.000	0.000	80	382	17144	16019	-0.288	Error	Error	7718	9426	0	0	6978	9041	0	0	0	0
1	4	19	""	"Q0055"	2690	17710	120	165	174	103	79	438	1749	0	0	0	492	498	329	297	931	2995	0	0	0	0	0	0	0	0	0	0	0	0	0	0	0	0	0	0	0	0	0	0.441	0.473	0.312	0.269	2.962	0.361	0.723	0.000	0.000	0.000	0.000	0.000	0.000	0.000	0.000	0.000	0.000	0.000	0.000	0.000	0.000	120	541	281	296	-1.181	Error	Error	86	195	0	0	95	201	0	0	0	0
1	5	19	""	"Q0075"	2880	17710	120	138	155	99	72	95	148	20	4	0	436	435	247	281	353	511	7	0	0	0	0	0	0	0	0	0	0	0	0	0	0	0	0	0	0	0	0	0.426	0.539	0.374	0.348	2.758	0.327	0.450	0.000	0.000	0.000	0.000	0.000	0.000	0.000	0.000	0.000	0.000	0.000	0.000	0.000	0.000	120	479	221	237	-1.232	Error	Error	66	155	0	0	83	154	0	0	0	0
1	6	19	""	"Q0095"	3040	17720	90	250	243	118	75	98	72	78	57	0	485	482	252	283	311	135	69	38	0	0	0	0	0	0	0	0	0	0	0	0	0	0	0	0	0	0	0	0.866	0.844	0.875	0.708	2.851	0.418	0.410	0.000	0.000	0.000	0.000	0.000	0.000	0.000	0.000	0.000	0.000	0.000	0.000	0.000	0.000	52	332	377	367	-0.207	Error	Error	175	202	0	0	168	199	0	0	0	0
1	7	19	""	"Q0180"	3240	17720	110	6278	4946	3200	83	261	924	78	71	0	883	769	494	275	316	179	65	58	0	0	0	0	0	0	0	0	0	0	0	0	0	0	0	0	0	0	0	10.189	9.844	8.501	7.754	2.976	8.802	0.787	0.000	0.000	0.000	0.000	0.000	0.000	0.000	0.000	0.000	0.000	0.000	0.000	0.000	0.000	80	508	6803	5357	3.349	Error	Error	6195	608	0	0	4863	494	0	0	0	0
1	8	19	""	"IntQ0185A"	3440	17720	110	5819	4710	3067	92	372	1086	75	71	0	894	822	519	287	331	239	67	57	0	0	0	0	0	0	0	0	0	0	0	0	0	0	0	0	0	0	0	9.435	8.632	8.265	8.443	1.753	7.856	0.816	0.000	0.000	0.000	0.000	0.000	0.000	0.000	0.000	0.000	0.000	0.000	0.000	0.000	0.000	80	498	6334	5153	3.238	Error	Error	5727	607	0	0	4618	535	0	0	0	0
1	9	19	""	"Q0195"	3650	17720	130	256	260	170	79	186	568	3	0	0	451	444	298	295	315	133	52	32	0	0	0	0	0	0	0	0	0	0	0	0	0	0	0	0	0	0	0	1.135	1.215	0.712	0.579	3.115	0.771	0.260	0.000	0.000	0.000	0.000	0.000	0.000	0.000	0.000	0.000	0.000	0.000	0.000	0.000	0.000	120	513	333	330	0.182	Error	Error	177	156	0	0	181	149	0	0	0	0
1	10	19	""	"Q0257"	3840	17720	130	315	298	152	69	125	274	41	0	0	708	643	266	291	353	301	69	13	0	0	0	0	0	0	0	0	0	0	0	0	0	0	0	0	0	0	0	0.590	0.651	0.590	0.557	1.885	0.530	0.681	0.000	0.000	0.000	0.000	0.000	0.000	0.000	0.000	0.000	0.000	0.000	0.000	0.000	0.000	120	509	663	581	-0.761	Error	Error	246	417	0	0	229	352	0	0	0	0
1	11	19	""	"IntQ0280A"	4010	17720	100	1375	1190	633	79	219	421	77	68	0	1545	1320	666	305	445	421	75	65	0	0	0	0	0	0	0	0	0	0	0	0	0	0	0	0	0	0	0	1.045	1.095	1.078	1.078	1.927	1.019	0.881	0.000	0.000	0.000	0.000	0.000	0.000	0.000	0.000	0.000	0.000	0.000	0.000	0.000	0.000	80	403	2536	2126	0.064	Error	Error	1296	1240	0	0	1111	1015	0	0	0	0
1	12	19	""	"Q0295"	4200	17720	110	2370	2223	1558	82	228	460	76	75	0	853	811	485	301	417	389	65	28	0	0	0	0	0	0	0	0	0	0	0	0	0	0	0	0	0	0	0	4.145	4.198	3.622	2.956	3.389	3.454	0.579	0.000	0.000	0.000	0.000	0.000	0.000	0.000	0.000	0.000	0.000	0.000	0.000	0.000	0.000	80	480	2840	2651	2.051	Error	Error	2288	552	0	0	2141	510	0	0	0	0
1	13	19	""	"iYHR216W"	4390	17720	110	6555	5874	4329	85	258	775	77	75	0	7464	6856	5258	293	525	1121	70	67	0	0	0	0	0	0	0	0	0	0	0	0	0	0	0	0	0	0	0	0.902	0.882	0.881	1.070	2.673	0.828	0.926	0.000	0.000	0.000	0.000	0.000	0.000	0.000	0.000	0.000	0.000	0.000	0.000	0.000	0.000	80	525	13641	12352	-0.148	Error	Error	6470	7171	0	0	5789	6563	0	0	0	0
1	14	19	""	"TEL9L"	4590	17720	110	19228	15848	11212	85	701	2490	78	72	0	19365	15368	10202	301	1078	2896	77	72	0	0	0	0	0	0	0	0	0	0	0	0	0	0	0	0	0	0	0	1.004	1.046	1.011	0.928	1.775	1.046	0.912	0.000	0.000	0.000	0.000	0.000	0.000	0.000	0.000	0.000	0.000	0.000	0.000	0.000	0.000	80	507	38207	30830	0.006	Error	Error	19143	19064	0	0	15763	15067	0	0	0	0
1	15	19	""	"YILCdelta3"	4780	17720	110	5928	6765	7150	81	829	2794	60	50	0	8442	7814	7434	298	1247	3338	57	51	0	0	0	0	0	0	0	0	0	0	0	0	0	0	0	0	0	0	0	0.718	0.889	0.842	0.955	2.833	0.872	0.891	0.000	0.000	0.000	0.000	0.000	0.000	0.000	0.000	0.000	0.000	0.000	0.000	0.000	0.000	80	472	13991	14200	-0.478	Error	Error	5847	8144	0	0	6684	7516	0	0	0	0
1	16	19	""	"YJRWdelta14"	4950	17730	110	472	434	240	76	302	1318	0	0	0	803	736	399	278	623	1853	0	0	0	0	0	0	0	0	0	0	0	0	0	0	0	0	0	0	0	0	0	0.754	0.782	0.682	0.626	2.368	0.701	0.820	0.000	0.000	0.000	0.000	0.000	0.000	0.000	0.000	0.000	0.000	0.000	0.000	0.000	0.000	80	465	921	816	-0.407	Error	Error	396	525	0	0	358	458	0	0	0	0
1	17	19	""	"SNR64"	5140	17720	110	661	591	338	74	105	119	80	75	0	632	599	353	280	324	247	62	23	0	0	0	0	0	0	0	0	0	0	0	0	0	0	0	0	0	0	0	1.668	1.621	1.471	1.364	2.677	1.176	0.654	0.000	0.000	0.000	0.000	0.000	0.000	0.000	0.000	0.000	0.000	0.000	0.000	0.000	0.000	80	514	939	836	0.738	Error	Error	587	352	0	0	517	319	0	0	0	0
1	18	19	""	"YKL162C-A"	5350	17720	110	576	518	313	77	116	152	72	65	0	1080	948	574	288	342	341	70	62	0	0	0	0	0	0	0	0	0	0	0	0	0	0	0	0	0	0	0	0.630	0.668	0.620	0.499	2.357	0.396	0.503	0.000	0.000	0.000	0.000	0.000	0.000	0.000	0.000	0.000	0.000	0.000	0.000	0.000	0.000	80	504	1291	1101	-0.666	Error	Error	499	792	0	0	441	660	0	0	0	0
1	19	19	""	"itQ(UUG)L"	5540	17720	110	603	565	352	74	122	265	68	48	0	1188	1079	672	303	372	381	68	60	0	0	0	0	0	0	0	0	0	0	0	0	0	0	0	0	0	0	0	0.598	0.633	0.603	0.513	2.016	0.545	0.823	0.000	0.000	0.000	0.000	0.000	0.000	0.000	0.000	0.000	0.000	0.000	0.000	0.000	0.000	80	507	1414	1267	-0.742	Error	Error	529	885	0	0	491	776	0	0	0	0
1	20	19	""	"RDN25-1B"	5740	17720	110	3895	3791	2824	77	151	313	85	73	0	13899	11811	8326	310	468	627	95	82	0	0	0	0	0	0	0	0	0	0	0	0	0	0	0	0	0	0	0	0.281	0.323	0.327	0.296	1.682	0.318	0.926	0.000	0.000	0.000	0.000	0.000	0.000	0.000	0.000	0.000	0.000	0.000	0.000	0.000	0.000	80	489	17407	15215	-1.832	Error	Error	3818	13589	0	0	3714	11501	0	0	0	0
1	21	19	""	"RDN37-1"	5910	17720	110	3723	3460	2051	78	187	385	88	80	0	7716	7254	3938	316	668	1178	87	80	0	0	0	0	0	0	0	0	0	0	0	0	0	0	0	0	0	0	0	0.493	0.487	0.482	0.457	1.537	0.478	0.914	0.000	0.000	0.000	0.000	0.000	0.000	0.000	0.000	0.000	0.000	0.000	0.000	0.000	0.000	80	458	11045	10320	-1.022	Error	Error	3645	7400	0	0	3382	6938	0	0	0	0
1	22	19	""	"iYLR162W-A"	6100	17730	110	4363	3882	2403	79	282	746	83	75	0	12971	11420	7413	320	1033	2692	77	73	0	0	0	0	0	0	0	0	0	0	0	0	0	0	0	0	0	0	0	0.339	0.343	0.337	0.353	1.615	0.308	0.914	0.000	0.000	0.000	0.000	0.000	0.000	0.000	0.000	0.000	0.000	0.000	0.000	0.000	0.000	80	522	16935	14903	-1.562	Error	Error	4284	12651	0	0	3803	11100	0	0	0	0
1	1	20	""	"tI(UAU)L"	2110	17910	110	492	459	421	72	88	79	72	66	0	1030	1977	7577	322	349	200	73	68	1	0	0	0	0	0	0	0	0	0	0	0	0	0	0	0	0	0	0	0.593	0.234	0.540	0.414	2.512	0.049	0.421	0.000	0.000	0.000	0.000	0.000	0.000	0.000	0.000	0.000	0.000	0.000	0.000	0.000	0.000	80	612	1128	2042	-0.753	Error	Error	420	708	0	0	387	1655	0	0	0	0
1	2	20	""	"YLRWdelta17"	2310	17920	100	1432	1242	913	76	123	218	75	67	0	1857	1589	1080	300	354	280	70	67	0	0	0	0	0	0	0	0	0	0	0	0	0	0	0	0	0	0	0	0.871	0.905	0.820	0.703	2.780	0.857	0.839	0.000	0.000	0.000	0.000	0.000	0.000	0.000	0.000	0.000	0.000	0.000	0.000	0.000	0.000	80	448	2913	2455	-0.199	Error	Error	1356	1557	0	0	1166	1289	0	0	0	0
1	3	20	"EMPTY"	"EMPTY"	2480	17900	150	73	71	27	72	359	1531	0	0	0	271	284	81	284	645	2206	0	0	0	0	0	0	0	0	0	0	0	0	0	0	0	0	0	0	0	0	0	-0.077	100000.000	0.391	0.322	4.555	0.573	0.885	0.000	0.000	0.000	0.000	0.000	0.000	0.000	0.000	0.000	0.000	0.000	0.000	0.000	0.000	156	765	-12	-1	Error	Error	Error	1	-13	0	0	-1	0	0	0	-75	0
1	4	20	"EMPTY"	"EMPTY"	2670	17900	150	65	67	26	69	230	1260	0	0	0	267	269	77	276	567	2167	0	0	0	0	0	0	0	0	0	0	0	0	0	0	0	0	0	0	0	0	0	0.444	0.286	0.357	0.438	3.899	65.639	0.002	0.000	0.000	0.000	0.000	0.000	0.000	0.000	0.000	0.000	0.000	0.000	0.000	0.000	0.000	156	751	-13	-9	-1.170	Error	Error	-4	-9	0	0	-2	-7	0	0	-75	0
1	5	20	"EMPTY"	"EMPTY"	2860	17900	150	70	71	25	68	72	30	10	3	0	264	274	74	279	287	80	14	1	0	0	0	0	0	0	0	0	0	0	0	0	0	0	0	0	0	0	0	-0.133	-0.600	0.333	0.305	3.658	0.009	0.001	0.000	0.000	0.000	0.000	0.000	0.000	0.000	0.000	0.000	0.000	0.000	0.000	0.000	0.000	156	722	-13	-2	Error	Error	Error	2	-15	0	0	3	-5	0	0	-75	0
1	6	20	"EMPTY"	"EMPTY"	3050	17900	150	64	72	32	70	80	46	7	0	0	282	288	79	285	298	100	10	3	0	0	0	0	0	0	0	0	0	0	0	0	0	0	0	0	0	0	0	2.000	0.667	0.500	0.485	3.819	0.109	0.044	0.000	0.000	0.000	0.000	0.000	0.000	0.000	0.000	0.000	0.000	0.000	0.000	0.000	0.000	156	758	-9	5	1.000	Error	Error	-6	-3	0	0	2	3	0	0	-75	0
1	7	20	"EMPTY"	"EMPTY"	3240	17900	150	73	76	32	75	165	677	0	0	0	280	283	75	286	304	135	3	0	0	0	0	0	0	0	0	0	0	0	0	0	0	0	0	0	0	0	0	0.333	-0.333	0.439	0.415	4.081	8.235	0.203	0.000	0.000	0.000	0.000	0.000	0.000	0.000	0.000	0.000	0.000	0.000	0.000	0.000	0.000	156	777	-8	-2	-1.585	Error	Error	-2	-6	0	0	1	-3	0	0	-75	0
1	8	20	"EMPTY"	"EMPTY"	3430	17900	150	73	76	30	80	216	807	0	0	0	282	295	88	285	307	144	6	1	0	0	0	0	0	0	0	0	0	0	0	0	0	0	0	0	0	0	0	2.333	-0.400	0.400	0.422	3.414	3.396	0.100	0.000	0.000	0.000	0.000	0.000	0.000	0.000	0.000	0.000	0.000	0.000	0.000	0.000	0.000	156	766	-10	6	1.222	Error	Error	-7	-3	0	0	-4	10	0	0	-75	0
1	9	20	"EMPTY"	"EMPTY"	3620	17900	150	72	72	28	76	138	458	0	0	0	295	298	84	287	305	114	8	1	0	0	0	0	0	0	0	0	0	0	0	0	0	0	0	0	0	0	0	-0.500	-0.364	0.408	0.440	4.094	0.023	0.003	0.000	0.000	0.000	0.000	0.000	0.000	0.000	0.000	0.000	0.000	0.000	0.000	0.000	0.000	156	731	4	7	Error	Error	Error	-4	8	0	0	-4	11	0	0	-75	0
1	10	20	"EMPTY"	"EMPTY"	3810	17900	150	81	81	29	76	82	47	7	0	0	298	304	79	287	305	113	11	0	0	0	0	0	0	0	0	0	0	0	0	0	0	0	0	0	0	0	0	0.455	0.294	0.344	0.424	4.039	0.044	0.009	0.000	0.000	0.000	0.000	0.000	0.000	0.000	0.000	0.000	0.000	0.000	0.000	0.000	0.000	156	693	16	22	-1.138	Error	Error	5	11	0	0	5	17	0	0	-75	0
1	11	20	"EMPTY"	"EMPTY"	4000	17910	150	83	87	31	88	125	213	0	0	0	288	299	76	297	340	230	0	0	0	0	0	0	0	0	0	0	0	0	0	0	0	0	0	0	0	0	0	0.556	-0.500	0.383	0.386	4.155	0.055	0.012	0.000	0.000	0.000	0.000	0.000	0.000	0.000	0.000	0.000	0.000	0.000	0.000	0.000	0.000	156	751	-14	1	-0.848	Error	Error	-5	-9	0	0	-1	2	0	0	-75	0
1	12	20	"EMPTY"	"EMPTY"	4190	17910	150	80	82	31	87	145	301	0	0	0	304	293	72	293	342	245	0	0	0	0	0	0	0	0	0	0	0	0	0	0	0	0	0	0	0	0	0	-0.636	100000.000	0.485	0.459	3.084	1.732	0.105	0.000	0.000	0.000	0.000	0.000	0.000	0.000	0.000	0.000	0.000	0.000	0.000	0.000	0.000	156	783	4	-5	Error	Error	Error	-7	11	0	0	-5	0	0	0	-75	0
1	13	20	"EMPTY"	"EMPTY"	4380	17910	150	71	75	33	76	162	606	0	0	0	286	282	71	283	400	862	0	0	0	0	0	0	0	0	0	0	0	0	0	0	0	0	0	0	0	0	0	-1.667	1.000	0.451	0.463	3.928	0.637	0.936	0.000	0.000	0.000	0.000	0.000	0.000	0.000	0.000	0.000	0.000	0.000	0.000	0.000	0.000	156	788	-2	-2	Error	Error	Error	-5	3	0	0	-1	-1	0	0	-75	0
1	14	20	"EMPTY"	"EMPTY"	4570	17910	150	72	74	27	76	360	1867	0	0	0	274	280	77	284	634	2079	0	0	0	0	0	0	0	0	0	0	0	0	0	0	0	0	0	0	0	0	0	0.400	0.500	0.531	0.517	4.484	1.007	0.969	0.000	0.000	0.000	0.000	0.000	0.000	0.000	0.000	0.000	0.000	0.000	0.000	0.000	0.000	156	789	-14	-6	-1.322	Error	Error	-4	-10	0	0	-2	-4	0	0	-75	0
1	15	20	"EMPTY"	"EMPTY"	4760	17910	150	68	67	24	72	439	2079	0	0	0	245	248	70	268	724	2395	0	0	0	0	0	0	0	0	0	0	0	0	0	0	0	0	0	0	0	0	0	0.174	0.250	0.395	0.389	4.254	0.881	0.986	0.000	0.000	0.000	0.000	0.000	0.000	0.000	0.000	0.000	0.000	0.000	0.000	0.000	0.000	156	764	-27	-25	-2.524	Error	Error	-4	-23	0	0	-5	-20	0	0	-75	0
1	16	20	"EMPTY"	"EMPTY"	4950	17910	150	65	68	27	66	183	985	0	0	0	260	263	71	260	435	1358	0	0	0	0	0	0	0	0	0	0	0	0	0	0	0	0	0	0	0	0	0	100000.000	0.667	0.448	0.419	3.880	0.029	0.005	0.000	0.000	0.000	0.000	0.000	0.000	0.000	0.000	0.000	0.000	0.000	0.000	0.000	0.000	156	756	-1	5	16.610	Error	Error	-1	0	0	0	2	3	0	0	-75	0
1	17	20	"EMPTY"	"EMPTY"	5140	17910	150	68	72	28	68	84	81	1	0	0	276	280	73	273	291	105	12	0	0	0	0	0	0	0	0	0	0	0	0	0	0	0	0	0	0	0	0	0.000	0.571	0.271	0.305	3.311	0.056	0.015	0.000	0.000	0.000	0.000	0.000	0.000	0.000	0.000	0.000	0.000	0.000	0.000	0.000	0.000	156	788	3	11	Error	Error	Error	0	3	0	0	4	7	0	0	-75	0
1	18	20	"EMPTY"	"EMPTY"	5330	17910	150	70	70	26	71	88	91	0	0	0	280	286	69	284	307	136	5	0	0	0	0	0	0	0	0	0	0	0	0	0	0	0	0	0	0	0	0	0.250	-0.500	0.288	0.352	5.006	0.049	0.012	0.000	0.000	0.000	0.000	0.000	0.000	0.000	0.000	0.000	0.000	0.000	0.000	0.000	0.000	156	796	-5	1	-2.000	Error	Error	-1	-4	0	0	-1	2	0	0	-75	0
1	19	20	"EMPTY"	"EMPTY"	5520	17910	150	68	74	33	71	96	208	0	0	0	291	308	95	298	337	299	1	0	0	0	0	0	0	0	0	0	0	0	0	0	0	0	0	0	0	0	0	0.429	0.300	0.261	0.294	4.658	0.166	0.184	0.000	0.000	0.000	0.000	0.000	0.000	0.000	0.000	0.000	0.000	0.000	0.000	0.000	0.000	156	785	-10	13	-1.222	Error	Error	-3	-7	0	0	3	10	0	0	-75	0
1	20	20	"EMPTY"	"EMPTY"	5710	17910	150	71	76	34	74	106	227	0	0	0	313	324	96	304	383	471	0	0	0	0	0	0	0	0	0	0	0	0	0	0	0	0	0	0	0	0	0	-0.333	0.100	0.327	0.361	4.028	0.642	0.855	0.000	0.000	0.000	0.000	0.000	0.000	0.000	0.000	0.000	0.000	0.000	0.000	0.000	0.000	156	779	6	22	Error	Error	Error	-3	9	0	0	2	20	0	0	-75	0
1	21	20	"EMPTY"	"EMPTY"	5900	17910	150	71	70	25	72	126	293	0	0	0	292	298	81	295	474	883	0	0	0	0	0	0	0	0	0	0	0	0	0	0	0	0	0	0	0	0	0	0.333	-0.667	0.316	0.346	4.130	0.318	0.883	0.000	0.000	0.000	0.000	0.000	0.000	0.000	0.000	0.000	0.000	0.000	0.000	0.000	0.000	156	762	-4	1	-1.585	Error	Error	-1	-3	0	0	-2	3	0	0	-75	0
1	22	20	"EMPTY"	"EMPTY"	6090	17910	150	71	73	30	70	154	491	0	0	0	286	293	82	280	569	1743	0	0	0	0	0	0	0	0	0	0	0	0	0	0	0	0	0	0	0	0	0	0.167	0.231	0.429	0.419	3.769	0.210	0.957	0.000	0.000	0.000	0.000	0.000	0.000	0.000	0.000	0.000	0.000	0.000	0.000	0.000	0.000	156	949	7	16	-2.585	Error	Error	1	6	0	0	3	13	0	0	-75	0
2	1	1	"VPS8"	"YAL002W"	6570	14250	140	447	434	149	79	83	34	99	96	0	894	902	283	313	322	89	96	92	0	0	0	0	0	0	0	0	0	0	0	0	0	0	0	0	0	0	0	0.633	0.603	0.593	0.603	1.688	0.531	0.705	0.000	0.000	0.000	0.000	0.000	0.000	0.000	0.000	0.000	0.000	0.000	0.000	0.000	0.000	156	743	949	944	-0.659	Error	Error	368	581	0	0	355	589	0	0	0	0
2	2	1	"MTW1"	"YAL034W-A"	6760	14250	140	5800	5410	2344	75	79	31	100	100	0	23643	22360	9638	308	319	87	100	100	0	0	0	0	0	0	0	0	0	0	0	0	0	0	0	0	0	0	0	0.245	0.242	0.247	0.250	1.630	0.233	0.920	0.000	0.000	0.000	0.000	0.000	0.000	0.000	0.000	0.000	0.000	0.000	0.000	0.000	0.000	156	633	29060	27387	-2.027	Error	Error	5725	23335	0	0	5335	22052	0	0	0	0
2	3	1	""	"YAL064W-B"	6950	14240	140	9808	8544	3451	74	77	29	100	100	0	7624	7349	2916	300	307	80	99	99	0	0	0	0	0	0	0	0	0	0	0	0	0	0	0	0	0	0	0	1.329	1.202	1.201	1.206	1.573	1.193	0.839	0.000	0.000	0.000	0.000	0.000	0.000	0.000	0.000	0.000	0.000	0.000	0.000	0.000	0.000	156	630	17058	15519	0.410	Error	Error	9734	7324	0	0	8470	7049	0	0	0	0
2	4	1	""	"YAL004W"	7110	14230	120	8652	8342	2069	78	81	28	100	100	0	5974	5757	1584	304	313	79	100	100	0	0	0	0	0	0	0	0	0	0	0	0	0	0	0	0	0	0	0	1.512	1.515	1.551	1.529	1.225	1.480	0.903	0.000	0.000	0.000	0.000	0.000	0.000	0.000	0.000	0.000	0.000	0.000	0.000	0.000	0.000	120	540	14244	13717	0.597	Error	Error	8574	5670	0	0	8264	5453	0	0	0	0
2	5	1	"FUN12"	"YAL035W"	7350	14260	150	71	73	28	76	78	29	11	3	0	312	318	89	307	320	186	3	0	0	0	0	0	0	0	0	0	0	0	0	0	0	0	0	0	0	0	0	-1.000	-0.273	0.397	0.396	4.151	0.001	0.000	0.000	0.000	0.000	0.000	0.000	0.000	0.000	0.000	0.000	0.000	0.000	0.000	0.000	0.000	156	775	0	8	Error	Error	Error	-5	5	0	0	-3	11	0	0	-50	0
2	6	1	""	"YAL066W"	7540	14260	150	70	71	26	73	74	29	16	0	0	293	299	80	299	308	198	1	0	0	0	0	0	0	0	0	0	0	0	0	0	0	0	0	0	0	0	0	0.500	100000.000	0.415	0.389	3.386	19757.963	0.000	0.000	0.000	0.000	0.000	0.000	0.000	0.000	0.000	0.000	0.000	0.000	0.000	0.000	0.000	156	657	-9	-2	-1.000	Error	Error	-3	-6	0	0	-2	0	0	0	-50	0
2	7	1	"ERP2"	"YAL007C"	7730	14260	150	76	76	27	70	73	34	12	1	0	292	299	80	287	292	75	20	3	0	0	0	0	0	0	0	0	0	0	0	0	0	0	0	0	0	0	0	1.200	0.500	0.396	0.417	3.464	0.048	0.012	0.000	0.000	0.000	0.000	0.000	0.000	0.000	0.000	0.000	0.000	0.000	0.000	0.000	0.000	156	659	11	18	0.263	Error	Error	6	5	0	0	6	12	0	0	-50	0
2	8	1	""	"YAL037W"	7920	14260	150	74	74	26	69	71	28	17	2	0	280	284	67	279	287	74	14	1	0	0	0	0	0	0	0	0	0	0	0	0	0	0	0	0	0	0	0	5.000	1.000	0.396	0.483	3.673	414.527	0.000	0.000	0.000	0.000	0.000	0.000	0.000	0.000	0.000	0.000	0.000	0.000	0.000	0.000	0.000	156	668	6	10	2.322	Error	Error	5	1	0	0	5	5	0	0	-50	0
2	9	1	""	"YAL068C"	8110	14260	150	68	71	26	70	72	26	17	3	0	283	290	71	272	280	74	18	6	0	0	0	0	0	0	0	0	0	0	0	0	0	0	0	0	0	0	0	-0.182	0.056	0.378	0.400	4.215	0.015	0.001	0.000	0.000	0.000	0.000	0.000	0.000	0.000	0.000	0.000	0.000	0.000	0.000	0.000	0.000	156	657	9	19	Error	Error	Error	-2	11	0	0	1	18	0	0	-50	0
2	10	1	"spo7"	"YAL009W"	8300	14260	150	73	75	28	71	73	28	16	5	0	282	291	83	279	284	73	23	5	0	0	0	0	0	0	0	0	0	0	0	0	0	0	0	0	0	0	0	0.667	0.333	0.264	0.301	4.517	0.006	0.000	0.000	0.000	0.000	0.000	0.000	0.000	0.000	0.000	0.000	0.000	0.000	0.000	0.000	0.000	156	690	5	16	-0.585	Error	Error	2	3	0	0	4	12	0	0	-50	0
2	11	1	"cyc3"	"YAL039C"	8490	14260	150	68	68	25	70	72	28	11	2	0	266	275	76	276	278	70	19	3	0	0	0	0	0	0	0	0	0	0	0	0	0	0	0	0	0	0	0	0.200	2.000	0.384	0.368	4.374	0.004	0.000	0.000	0.000	0.000	0.000	0.000	0.000	0.000	0.000	0.000	0.000	0.000	0.000	0.000	0.000	156	672	-12	-3	-2.322	Error	Error	-2	-10	0	0	-2	-1	0	0	-50	0
2	12	1	"ERP1"	"YAR002C-A"	8660	14260	140	117	120	49	68	75	55	45	12	0	472	458	181	270	285	142	67	30	0	0	0	0	0	0	0	0	0	0	0	0	0	0	0	0	0	0	0	0.243	0.277	0.244	0.235	2.707	0.151	0.203	0.000	0.000	0.000	0.000	0.000	0.000	0.000	0.000	0.000	0.000	0.000	0.000	0.000	0.000	156	594	251	240	-2.044	Error	Error	49	202	0	0	52	188	0	0	0	0
2	13	1	"SLI15"	"YBR156C"	8840	14250	140	600	629	337	68	79	91	91	85	0	1098	1219	662	272	297	179	86	82	0	0	0	0	0	0	0	0	0	0	0	0	0	0	0	0	0	0	0	0.644	0.592	0.564	0.617	1.935	0.520	0.804	0.000	0.000	0.000	0.000	0.000	0.000	0.000	0.000	0.000	0.000	0.000	0.000	0.000	0.000	156	693	1358	1508	-0.635	Error	Error	532	826	0	0	561	947	0	0	0	0
2	14	1	""	"YBR187W"	9040	14250	140	1018	942	429	66	69	28	96	95	0	621	616	259	276	284	85	83	80	0	0	0	0	0	0	0	0	0	0	0	0	0	0	0	0	0	0	0	2.759	2.576	2.522	2.411	2.092	2.328	0.656	0.000	0.000	0.000	0.000	0.000	0.000	0.000	0.000	0.000	0.000	0.000	0.000	0.000	0.000	156	698	1297	1216	1.464	Error	Error	952	345	0	0	876	340	0	0	0	0
2	15	1	""	"YBR219C"	9240	14260	140	676	627	260	67	71	29	96	93	0	503	497	190	279	284	73	80	68	0	0	0	0	0	0	0	0	0	0	0	0	0	0	0	0	0	0	0	2.719	2.569	2.275	2.410	1.865	2.277	0.566	0.000	0.000	0.000	0.000	0.000	0.000	0.000	0.000	0.000	0.000	0.000	0.000	0.000	0.000	156	657	833	778	1.443	Error	Error	609	224	0	0	560	218	0	0	0	0
2	16	1	""	"YBR158W"	9430	14260	140	829	840	405	73	75	28	99	96	0	557	558	259	286	291	79	78	70	0	0	0	0	0	0	0	0	0	0	0	0	0	0	0	0	0	0	0	2.790	2.820	2.627	2.869	1.826	2.390	0.614	0.000	0.000	0.000	0.000	0.000	0.000	0.000	0.000	0.000	0.000	0.000	0.000	0.000	0.000	156	615	1027	1039	1.480	Error	Error	756	271	0	0	767	272	0	0	0	0
2	17	1	"RPS9B"	"YBR189W"	9610	14260	140	1111	1037	437	73	75	27	99	98	0	740	739	304	293	298	81	87	85	0	0	0	0	0	0	0	0	0	0	0	0	0	0	0	0	0	0	0	2.322	2.161	2.106	2.199	1.644	2.019	0.711	0.000	0.000	0.000	0.000	0.000	0.000	0.000	0.000	0.000	0.000	0.000	0.000	0.000	0.000	156	631	1485	1410	1.215	Error	Error	1038	447	0	0	964	446	0	0	0	0
2	18	1	"pdb1"	"YBR221C"	9800	14260	140	662	664	295	71	76	36	96	94	0	545	536	201	291	299	88	83	67	0	0	0	0	0	0	0	0	0	0	0	0	0	0	0	0	0	0	0	2.327	2.420	2.242	2.334	1.908	2.111	0.614	0.000	0.000	0.000	0.000	0.000	0.000	0.000	0.000	0.000	0.000	0.000	0.000	0.000	0.000	156	683	845	838	1.218	Error	Error	591	254	0	0	593	245	0	0	0	0
2	19	1	"cdc28"	"YBR160W"	9990	14260	140	1483	1388	632	71	76	41	98	95	0	925	890	404	284	298	96	85	83	0	0	0	0	0	0	0	0	0	0	0	0	0	0	0	0	0	0	0	2.203	2.173	2.026	2.166	1.646	2.180	0.743	0.000	0.000	0.000	0.000	0.000	0.000	0.000	0.000	0.000	0.000	0.000	0.000	0.000	0.000	156	683	2053	1923	1.139	Error	Error	1412	641	0	0	1317	606	0	0	0	0
2	20	1	"RPL21A"	"YBR191W"	10190	14260	140	857	821	380	69	71	28	99	96	0	1272	1208	484	287	294	75	91	89	0	0	0	0	0	0	0	0	0	0	0	0	0	0	0	0	0	0	0	0.800	0.817	0.800	0.802	1.638	0.798	0.822	0.000	0.000	0.000	0.000	0.000	0.000	0.000	0.000	0.000	0.000	0.000	0.000	0.000	0.000	156	650	1773	1673	-0.322	Error	Error	788	985	0	0	752	921	0	0	0	0
2	21	1	""	"YBR223C"	10370	14260	140	813	774	345	68	70	26	97	94	0	643	632	236	290	295	71	85	80	0	0	0	0	0	0	0	0	0	0	0	0	0	0	0	0	0	0	0	2.110	2.064	1.941	2.025	2.232	2.039	0.662	0.000	0.000	0.000	0.000	0.000	0.000	0.000	0.000	0.000	0.000	0.000	0.000	0.000	0.000	156	646	1098	1048	1.078	Error	Error	745	353	0	0	706	342	0	0	0	0
2	22	1	""	"YBR162C"	10560	14260	140	1000	993	426	66	72	78	96	93	0	1326	1289	583	288	299	105	89	86	0	0	0	0	0	0	0	0	0	0	0	0	0	0	0	0	0	0	0	0.900	0.926	0.923	0.932	1.753	0.866	0.820	0.000	0.000	0.000	0.000	0.000	0.000	0.000	0.000	0.000	0.000	0.000	0.000	0.000	0.000	156	801	1972	1928	-0.152	Error	Error	934	1038	0	0	927	1001	0	0	0	0
2	1	2	"MED8"	"YBR193C"	6580	14450	140	2588	2488	1163	80	93	86	96	92	0	8626	8092	3925	321	345	195	94	92	0	0	0	0	0	0	0	0	0	0	0	0	0	0	0	0	0	0	0	0.302	0.310	0.309	0.322	1.460	0.294	0.906	0.000	0.000	0.000	0.000	0.000	0.000	0.000	0.000	0.000	0.000	0.000	0.000	0.000	0.000	156	631	10813	10179	-1.727	Error	Error	2508	8305	0	0	2408	7771	0	0	0	0
2	2	2	""	"YBR225W"	6770	14450	140	4273	4066	1750	77	90	93	100	100	0	6565	6154	2693	302	336	216	99	98	0	0	0	0	0	0	0	0	0	0	0	0	0	0	0	0	0	0	0	0.670	0.682	0.682	0.694	1.444	0.673	0.897	0.000	0.000	0.000	0.000	0.000	0.000	0.000	0.000	0.000	0.000	0.000	0.000	0.000	0.000	156	473	10459	9841	-0.578	Error	Error	4196	6263	0	0	3989	5852	0	0	0	0
2	3	2	""	"YDL062W"	6960	14450	140	1377	1266	381	74	77	30	100	100	0	1283	1220	386	295	302	78	92	91	0	0	0	0	0	0	0	0	0	0	0	0	0	0	0	0	0	0	0	1.319	1.289	1.311	1.398	1.648	1.232	0.858	0.000	0.000	0.000	0.000	0.000	0.000	0.000	0.000	0.000	0.000	0.000	0.000	0.000	0.000	156	486	2291	2117	0.399	Error	Error	1303	988	0	0	1192	925	0	0	0	0
2	4	2	""	"YDL094C"	7150	14450	140	2283	2100	874	78	81	31	100	99	0	2460	2258	901	304	311	85	95	92	0	0	0	0	0	0	0	0	0	0	0	0	0	0	0	0	0	0	0	1.023	1.035	1.032	1.128	1.600	1.014	0.887	0.000	0.000	0.000	0.000	0.000	0.000	0.000	0.000	0.000	0.000	0.000	0.000	0.000	0.000	156	563	4361	3976	0.032	Error	Error	2205	2156	0	0	2022	1954	0	0	0	0
2	5	2	"CDC48"	"YDL126C"	7340	14450	140	2015	2135	1060	79	81	31	100	100	0	2047	2139	1118	305	322	226	92	88	0	0	0	0	0	0	0	0	0	0	0	0	0	0	0	0	0	0	0	1.111	1.121	1.158	1.239	1.558	1.046	0.839	0.000	0.000	0.000	0.000	0.000	0.000	0.000	0.000	0.000	0.000	0.000	0.000	0.000	0.000	156	502	3678	3890	0.152	Error	Error	1936	1742	0	0	2056	1834	0	0	0	0
2	6	2	"UBC9"	"YDL064W"	7530	14450	140	1501	1404	500	74	77	34	100	99	0	1938	1858	743	294	309	247	91	90	0	0	0	0	0	0	0	0	0	0	0	0	0	0	0	0	0	0	0	0.868	0.850	0.851	0.948	1.727	0.783	0.895	0.000	0.000	0.000	0.000	0.000	0.000	0.000	0.000	0.000	0.000	0.000	0.000	0.000	0.000	156	452	3071	2894	-0.204	Error	Error	1427	1644	0	0	1330	1564	0	0	0	0
2	7	2	""	"YDL096C"	7710	14450	140	1327	1197	529	74	81	46	98	96	0	913	854	352	285	296	105	85	82	0	0	0	0	0	0	0	0	0	0	0	0	0	0	0	0	0	0	0	1.995	1.974	1.922	2.058	1.565	1.819	0.767	0.000	0.000	0.000	0.000	0.000	0.000	0.000	0.000	0.000	0.000	0.000	0.000	0.000	0.000	156	526	1881	1692	0.997	Error	Error	1253	628	0	0	1123	569	0	0	0	0
2	8	2	"VCX1"	"YDL128W"	7900	14450	140	1245	1446	987	74	79	41	96	94	0	1585	1714	1089	284	291	78	91	88	0	0	0	0	0	0	0	0	0	0	0	0	0	0	0	0	0	0	0	0.900	0.959	0.877	1.009	2.107	0.901	0.834	0.000	0.000	0.000	0.000	0.000	0.000	0.000	0.000	0.000	0.000	0.000	0.000	0.000	0.000	156	512	2472	2802	-0.152	Error	Error	1171	1301	0	0	1372	1430	0	0	0	0
2	9	2	"IDP1"	"YDL066W"	8090	14450	140	1445	1267	521	74	78	49	98	97	0	2349	2179	928	286	296	126	92	91	0	0	0	0	0	0	0	0	0	0	0	0	0	0	0	0	0	0	0	0.665	0.630	0.625	0.660	1.717	0.590	0.896	0.000	0.000	0.000	0.000	0.000	0.000	0.000	0.000	0.000	0.000	0.000	0.000	0.000	0.000	156	464	3434	3086	-0.590	Error	Error	1371	2063	0	0	1193	1893	0	0	0	0
2	10	2	"SNU23"	"YDL098C"	8270	14450	140	1222	1088	504	74	80	49	94	92	0	1465	1333	649	283	299	124	83	81	0	0	0	0	0	0	0	0	0	0	0	0	0	0	0	0	0	0	0	0.971	0.966	0.903	1.049	2.155	0.862	0.822	0.000	0.000	0.000	0.000	0.000	0.000	0.000	0.000	0.000	0.000	0.000	0.000	0.000	0.000	156	494	2330	2064	-0.042	Error	Error	1148	1182	0	0	1014	1050	0	0	0	0
2	11	2	"RPP1B"	"YDL130W"	8480	14460	140	798	767	315	75	78	28	98	97	0	1130	1063	420	280	286	79	91	88	0	0	0	0	0	0	0	0	0	0	0	0	0	0	0	0	0	0	0	0.851	0.884	0.850	0.923	1.639	0.847	0.796	0.000	0.000	0.000	0.000	0.000	0.000	0.000	0.000	0.000	0.000	0.000	0.000	0.000	0.000	156	493	1573	1475	-0.233	Error	Error	723	850	0	0	692	783	0	0	0	0
2	12	2	""	"YDL068W"	8670	14450	140	950	1050	535	79	123	194	91	85	0	2043	1783	756	287	350	312	87	80	0	0	0	0	0	0	0	0	0	0	0	0	0	0	0	0	0	0	0	0.496	0.649	0.595	0.645	1.792	0.629	0.758	0.000	0.000	0.000	0.000	0.000	0.000	0.000	0.000	0.000	0.000	0.000	0.000	0.000	0.000	156	553	2627	2467	-1.012	Error	Error	871	1756	0	0	971	1496	0	0	0	0
2	13	2	""	"YDL100C"	8890	14450	110	1486	1346	746	79	135	216	86	77	0	1084	970	483	289	368	338	71	56	0	0	0	0	0	0	0	0	0	0	0	0	0	0	0	0	0	0	0	1.770	1.860	1.776	1.776	1.571	1.714	0.764	0.000	0.000	0.000	0.000	0.000	0.000	0.000	0.000	0.000	0.000	0.000	0.000	0.000	0.000	80	441	2202	1948	0.824	Error	Error	1407	795	0	0	1267	681	0	0	0	0
2	14	2	"LYS21"	"YDL131W"	9050	14460	140	1195	1166	527	70	83	85	94	92	0	920	902	341	280	291	111	89	85	0	0	0	0	0	0	0	0	0	0	0	0	0	0	0	0	0	0	0	1.758	1.762	1.781	1.678	1.799	1.135	0.297	0.000	0.000	0.000	0.000	0.000	0.000	0.000	0.000	0.000	0.000	0.000	0.000	0.000	0.000	156	620	1765	1718	0.814	Error	Error	1125	640	0	0	1096	622	0	0	0	0
2	15	2	"CCT6"	"YDR188W"	9250	14450	140	937	890	397	70	73	28	96	92	0	665	670	287	284	285	77	85	82	0	0	0	0	0	0	0	0	0	0	0	0	0	0	0	0	0	0	0	2.276	2.124	2.128	2.098	1.770	1.962	0.697	0.000	0.000	0.000	0.000	0.000	0.000	0.000	0.000	0.000	0.000	0.000	0.000	0.000	0.000	156	560	1248	1206	1.186	Error	Error	867	381	0	0	820	386	0	0	0	0
2	16	2	"adr1"	"YDR216W"	9440	14460	140	535	641	534	76	84	66	92	85	0	978	1084	729	296	313	202	83	69	0	0	0	0	0	0	0	0	0	0	0	0	0	0	0	0	0	0	0	0.673	0.717	0.693	0.703	2.077	0.703	0.753	0.000	0.000	0.000	0.000	0.000	0.000	0.000	0.000	0.000	0.000	0.000	0.000	0.000	0.000	156	476	1141	1353	-0.571	Error	Error	459	682	0	0	565	788	0	0	0	0
2	17	2	""	"YDR248C"	9620	14460	140	338	362	200	76	108	402	25	1	0	995	976	518	296	338	490	64	27	0	0	0	0	0	0	0	0	0	0	0	0	0	0	0	0	0	0	0	0.375	0.421	0.390	0.393	1.855	0.349	0.746	0.000	0.000	0.000	0.000	0.000	0.000	0.000	0.000	0.000	0.000	0.000	0.000	0.000	0.000	156	512	961	966	-1.416	Error	Error	262	699	0	0	286	680	0	0	0	0
2	18	2	""	"YDR190C"	9810	14460	130	1161	1114	571	76	83	49	95	94	0	1885	1791	842	288	309	141	90	86	0	0	0	0	0	0	0	0	0	0	0	0	0	0	0	0	0	0	0	0.679	0.691	0.658	0.669	1.456	0.653	0.858	0.000	0.000	0.000	0.000	0.000	0.000	0.000	0.000	0.000	0.000	0.000	0.000	0.000	0.000	120	529	2682	2541	-0.558	Error	Error	1085	1597	0	0	1038	1503	0	0	0	0
2	19	2	"SPR28"	"YDR218C"	10020	14460	140	979	1013	532	73	82	52	96	94	0	739	701	278	288	316	166	80	64	0	0	0	0	0	0	0	0	0	0	0	0	0	0	0	0	0	0	0	2.009	2.276	2.128	2.256	1.790	2.307	0.590	0.000	0.000	0.000	0.000	0.000	0.000	0.000	0.000	0.000	0.000	0.000	0.000	0.000	0.000	156	529	1357	1353	1.006	Error	Error	906	451	0	0	940	413	0	0	0	0
2	20	2	""	"YDR250C"	10190	14460	140	405	386	170	70	74	41	91	85	0	503	488	191	284	301	145	62	31	0	0	0	0	0	0	0	0	0	0	0	0	0	0	0	0	0	0	0	1.530	1.549	1.448	1.503	2.204	1.159	0.562	0.000	0.000	0.000	0.000	0.000	0.000	0.000	0.000	0.000	0.000	0.000	0.000	0.000	0.000	156	503	554	520	0.613	Error	Error	335	219	0	0	316	204	0	0	0	0
2	21	2	"NUP42"	"YDR192C"	10400	14460	140	913	901	487	69	82	127	91	85	0	1472	1408	712	288	320	276	84	82	0	0	0	0	0	0	0	0	0	0	0	0	0	0	0	0	0	0	0	0.713	0.743	0.727	0.698	2.130	0.692	0.805	0.000	0.000	0.000	0.000	0.000	0.000	0.000	0.000	0.000	0.000	0.000	0.000	0.000	0.000	156	529	2028	1952	-0.488	Error	Error	844	1184	0	0	832	1120	0	0	0	0
2	22	2	""	"YDR220C"	10590	14460	140	448	419	156	66	77	109	88	82	0	487	482	174	290	317	249	35	3	0	0	0	0	0	0	0	0	0	0	0	0	0	0	0	0	0	0	0	1.939	1.839	1.712	1.726	2.260	1.069	0.494	0.000	0.000	0.000	0.000	0.000	0.000	0.000	0.000	0.000	0.000	0.000	0.000	0.000	0.000	156	719	579	545	0.955	Error	Error	382	197	0	0	353	192	0	0	0	0
2	1	3	"BTT1"	"YDR252W"	6590	14640	130	1470	1362	536	79	106	146	95	92	0	2544	2499	916	308	376	345	94	91	0	0	0	0	0	0	0	0	0	0	0	0	0	0	0	0	0	0	0	0.622	0.586	0.586	0.578	1.407	0.552	0.884	0.000	0.000	0.000	0.000	0.000	0.000	0.000	0.000	0.000	0.000	0.000	0.000	0.000	0.000	120	604	3627	3474	-0.685	Error	Error	1391	2236	0	0	1283	2191	0	0	0	0
2	2	3	"MSS116"	"YDR194C"	6780	14640	140	3792	3587	1656	77	109	158	98	96	0	2615	2498	1078	302	379	375	92	85	0	0	0	0	0	0	0	0	0	0	0	0	0	0	0	0	0	0	0	1.606	1.598	1.624	1.646	1.602	1.642	0.830	0.000	0.000	0.000	0.000	0.000	0.000	0.000	0.000	0.000	0.000	0.000	0.000	0.000	0.000	156	510	6028	5706	0.684	Error	Error	3715	2313	0	0	3510	2196	0	0	0	0
2	3	3	""	"YDR222W"	6970	14640	150	2879	2811	1318	73	79	39	100	100	0	2732	2638	1269	305	328	292	90	85	0	0	0	0	0	0	0	0	0	0	0	0	0	0	0	0	0	0	0	1.156	1.174	1.181	1.261	1.591	1.131	0.887	0.000	0.000	0.000	0.000	0.000	0.000	0.000	0.000	0.000	0.000	0.000	0.000	0.000	0.000	156	510	5233	5071	0.209	Error	Error	2806	2427	0	0	2738	2333	0	0	0	0
2	4	3	"CHL4"	"YDR254W"	7160	14650	150	3413	2985	1459	75	78	31	100	99	0	9154	8137	4032	307	313	88	98	97	0	0	0	0	0	0	0	0	0	0	0	0	0	0	0	0	0	0	0	0.377	0.372	0.378	0.397	1.729	0.350	0.889	0.000	0.000	0.000	0.000	0.000	0.000	0.000	0.000	0.000	0.000	0.000	0.000	0.000	0.000	156	533	12185	10740	-1.406	Error	Error	3338	8847	0	0	2910	7830	0	0	0	0
2	5	3	"UBC8"	"YEL012W"	7370	14650	140	2485	2288	739	75	83	139	99	98	0	1913	1789	540	299	316	213	96	92	0	0	0	0	0	0	0	0	0	0	0	0	0	0	0	0	0	0	0	1.493	1.485	1.502	1.529	1.465	1.484	0.896	0.000	0.000	0.000	0.000	0.000	0.000	0.000	0.000	0.000	0.000	0.000	0.000	0.000	0.000	156	545	4024	3703	0.578	Error	Error	2410	1614	0	0	2213	1490	0	0	0	0
2	6	3	"GDA1"	"YEL042W"	7550	14650	120	1483	1518	771	72	78	44	98	98	0	1059	1074	504	283	293	114	93	89	0	0	0	0	0	0	0	0	0	0	0	0	0	0	0	0	0	0	0	1.818	1.828	1.839	1.782	1.693	1.785	0.781	0.000	0.000	0.000	0.000	0.000	0.000	0.000	0.000	0.000	0.000	0.000	0.000	0.000	0.000	120	505	2187	2237	0.863	Error	Error	1411	776	0	0	1446	791	0	0	0	0
2	7	3	""	"YEL073C"	7750	14660	90	162	160	63	72	85	50	67	44	0	400	395	134	281	291	94	61	21	0	0	0	0	0	0	0	0	0	0	0	0	0	0	0	0	0	0	0	0.756	0.772	0.625	0.667	2.621	0.281	0.185	0.000	0.000	0.000	0.000	0.000	0.000	0.000	0.000	0.000	0.000	0.000	0.000	0.000	0.000	52	363	209	202	-0.403	Error	Error	90	119	0	0	88	114	0	0	0	0
2	8	3	""	"YEL014C"	7940	14650	130	1156	1053	400	71	74	29	100	98	0	807	792	290	275	282	76	90	86	0	0	0	0	0	0	0	0	0	0	0	0	0	0	0	0	0	0	0	2.039	1.899	1.845	1.924	1.719	1.799	0.769	0.000	0.000	0.000	0.000	0.000	0.000	0.000	0.000	0.000	0.000	0.000	0.000	0.000	0.000	120	568	1617	1499	1.028	Error	Error	1085	532	0	0	982	517	0	0	0	0
2	9	3	""	"YEL044W"	8130	14650	130	703	672	278	72	79	50	96	95	0	567	586	209	285	293	117	80	60	0	0	0	0	0	0	0	0	0	0	0	0	0	0	0	0	0	0	0	2.238	1.993	1.913	2.052	2.076	1.736	0.664	0.000	0.000	0.000	0.000	0.000	0.000	0.000	0.000	0.000	0.000	0.000	0.000	0.000	0.000	120	572	913	901	1.162	Error	Error	631	282	0	0	600	301	0	0	0	0
2	10	3	""	"YEL075C"	8320	14650	130	14424	13594	5273	72	77	31	100	100	0	6791	6393	2462	285	292	81	100	100	0	0	0	0	0	0	0	0	0	0	0	0	0	0	0	0	0	0	0	2.206	2.214	2.225	2.224	1.409	2.227	0.911	0.000	0.000	0.000	0.000	0.000	0.000	0.000	0.000	0.000	0.000	0.000	0.000	0.000	0.000	120	528	20858	19630	1.141	Error	Error	14352	6506	0	0	13522	6108	0	0	0	0
2	11	3	""	"YEL016C"	8510	14650	140	2565	2500	897	74	76	28	100	100	0	1600	1511	501	283	295	203	94	92	0	0	0	0	0	0	0	0	0	0	0	0	0	0	0	0	0	0	0	1.891	1.976	1.979	2.050	1.539	1.992	0.865	0.000	0.000	0.000	0.000	0.000	0.000	0.000	0.000	0.000	0.000	0.000	0.000	0.000	0.000	156	553	3808	3654	0.919	Error	Error	2491	1317	0	0	2426	1228	0	0	0	0
2	12	3	"GLY1"	"YEL046C"	8700	14650	130	1614	1493	469	77	90	108	100	99	0	961	915	262	282	316	272	89	71	0	0	0	0	0	0	0	0	0	0	0	0	0	0	0	0	0	0	0	2.264	2.237	2.205	2.383	1.643	2.195	0.812	0.000	0.000	0.000	0.000	0.000	0.000	0.000	0.000	0.000	0.000	0.000	0.000	0.000	0.000	120	544	2216	2049	1.179	Error	Error	1537	679	0	0	1416	633	0	0	0	0
2	13	3	""	"YEL076C-A"	8890	14650	130	12703	12185	5247	78	93	99	100	100	0	5475	5205	2192	277	293	109	100	100	0	0	0	0	0	0	0	0	0	0	0	0	0	0	0	0	0	0	0	2.429	2.457	2.484	2.486	1.416	2.468	0.913	0.000	0.000	0.000	0.000	0.000	0.000	0.000	0.000	0.000	0.000	0.000	0.000	0.000	0.000	120	614	17823	17035	1.280	Error	Error	12625	5198	0	0	12107	4928	0	0	0	0
2	14	3	""	"YEL017W"	9090	14670	110	188	189	65	74	79	42	85	67	0	442	428	133	279	288	84	67	47	0	0	0	0	0	0	0	0	0	0	0	0	0	0	0	0	0	0	0	0.699	0.772	0.571	0.731	2.972	0.372	0.274	0.000	0.000	0.000	0.000	0.000	0.000	0.000	0.000	0.000	0.000	0.000	0.000	0.000	0.000	80	476	277	264	-0.516	Error	Error	114	163	0	0	115	149	0	0	0	0
2	15	3	""	"YEL048C"	9280	14660	130	559	548	212	71	75	27	96	95	0	789	757	284	284	289	74	88	86	0	0	0	0	0	0	0	0	0	0	0	0	0	0	0	0	0	0	0	0.966	1.008	0.925	1.003	1.899	0.841	0.714	0.000	0.000	0.000	0.000	0.000	0.000	0.000	0.000	0.000	0.000	0.000	0.000	0.000	0.000	120	538	993	950	-0.049	Error	Error	488	505	0	0	477	473	0	0	0	0
2	16	3	""	"YEL077C"	9460	14650	130	14146	14989	7288	75	130	541	100	100	0	8343	8699	3644	295	363	675	100	99	0	0	0	0	0	0	0	0	0	0	0	0	0	0	0	0	0	0	0	1.748	1.775	1.689	1.738	1.388	1.838	0.902	0.000	0.000	0.000	0.000	0.000	0.000	0.000	0.000	0.000	0.000	0.000	0.000	0.000	0.000	120	514	22119	23318	0.806	Error	Error	14071	8048	0	0	14914	8404	0	0	0	0
2	17	3	"RPL29"	"YFR032C-A"	9660	14660	120	290	277	105	74	129	542	0	0	0	477	459	156	286	353	677	0	0	0	0	0	0	0	0	0	0	0	0	0	0	0	0	0	0	0	0	0	1.131	1.173	1.081	1.148	2.317	0.797	0.935	0.000	0.000	0.000	0.000	0.000	0.000	0.000	0.000	0.000	0.000	0.000	0.000	0.000	0.000	120	513	407	376	0.177	Error	Error	216	191	0	0	203	173	0	0	0	0
2	18	3	""	"YGL007W"	9850	14650	130	651	606	240	73	78	35	96	94	0	599	567	205	289	300	114	80	65	0	0	0	0	0	0	0	0	0	0	0	0	0	0	0	0	0	0	0	1.865	1.917	1.975	1.911	1.882	1.775	0.591	0.000	0.000	0.000	0.000	0.000	0.000	0.000	0.000	0.000	0.000	0.000	0.000	0.000	0.000	120	520	888	811	0.899	Error	Error	578	310	0	0	533	278	0	0	0	0
2	19	3	""	"YGL039W"	10030	14650	130	1133	1038	372	70	78	59	99	97	0	2293	2149	745	279	312	216	95	94	0	0	0	0	0	0	0	0	0	0	0	0	0	0	0	0	0	0	0	0.528	0.518	0.521	0.520	1.412	0.483	0.866	0.000	0.000	0.000	0.000	0.000	0.000	0.000	0.000	0.000	0.000	0.000	0.000	0.000	0.000	120	493	3077	2838	-0.922	Error	Error	1063	2014	0	0	968	1870	0	0	0	0
2	20	3	"pho4"	"YFR034C"	10230	14650	130	682	649	206	68	77	58	100	99	0	544	527	150	279	310	213	57	10	0	0	0	0	0	0	0	0	0	0	0	0	0	0	0	0	0	0	0	2.317	2.343	2.117	2.315	1.700	1.310	0.321	0.000	0.000	0.000	0.000	0.000	0.000	0.000	0.000	0.000	0.000	0.000	0.000	0.000	0.000	120	511	879	829	1.212	Error	Error	614	265	0	0	581	248	0	0	0	0
2	21	3	"leu1"	"YGL009C"	10410	14650	130	1721	1784	747	68	95	174	100	98	0	3889	4057	1562	288	372	498	100	96	0	0	0	0	0	0	0	0	0	0	0	0	0	0	0	0	0	0	0	0.459	0.455	0.446	0.450	1.377	0.434	0.896	0.000	0.000	0.000	0.000	0.000	0.000	0.000	0.000	0.000	0.000	0.000	0.000	0.000	0.000	120	525	5254	5485	-1.123	Error	Error	1653	3601	0	0	1716	3769	0	0	0	0
2	22	3	""	"YGL041C"	10610	14660	130	726	702	244	70	91	157	94	87	0	1217	1207	455	288	357	451	85	53	0	0	0	0	0	0	0	0	0	0	0	0	0	0	0	0	0	0	0	0.706	0.688	0.692	0.717	1.506	0.494	0.715	0.000	0.000	0.000	0.000	0.000	0.000	0.000	0.000	0.000	0.000	0.000	0.000	0.000	0.000	120	642	1585	1551	-0.502	Error	Error	656	929	0	0	632	919	0	0	0	0
2	1	4	"cdc26"	"YFR036W"	6620	14840	130	1798	1619	605	77	91	96	99	96	0	1621	1539	538	298	330	245	94	88	0	0	0	0	0	0	0	0	0	0	0	0	0	0	0	0	0	0	0	1.301	1.243	1.235	1.275	1.554	1.182	0.844	0.000	0.000	0.000	0.000	0.000	0.000	0.000	0.000	0.000	0.000	0.000	0.000	0.000	0.000	120	666	3044	2783	0.379	Error	Error	1721	1323	0	0	1542	1241	0	0	0	0
2	2	4	"SCL1"	"YGL011C"	6810	14840	130	3842	3503	1367	77	86	61	100	100	0	9679	9120	3590	295	347	430	100	99	0	0	0	0	0	0	0	0	0	0	0	0	0	0	0	0	0	0	0	0.401	0.388	0.391	0.380	1.355	0.359	0.916	0.000	0.000	0.000	0.000	0.000	0.000	0.000	0.000	0.000	0.000	0.000	0.000	0.000	0.000	120	563	13149	12251	-1.318	Error	Error	3765	9384	0	0	3426	8825	0	0	0	0
2	3	4	"dst1"	"YGL043W"	7010	14840	120	1213	1405	933	77	86	59	98	95	0	1318	1441	771	299	352	452	84	58	0	0	0	0	0	0	0	0	0	0	0	0	0	0	0	0	0	0	0	1.115	1.163	1.134	1.151	1.560	1.009	0.623	0.000	0.000	0.000	0.000	0.000	0.000	0.000	0.000	0.000	0.000	0.000	0.000	0.000	0.000	120	495	2155	2470	0.157	Error	Error	1136	1019	0	0	1328	1142	0	0	0	0
2	4	4	""	"YFR038W"	7190	14840	130	2943	2815	1275	75	80	37	100	100	0	2847	2728	1111	291	301	125	97	97	0	0	0	0	0	0	0	0	0	0	0	0	0	0	0	0	0	0	0	1.122	1.124	1.116	1.141	1.486	1.127	0.871	0.000	0.000	0.000	0.000	0.000	0.000	0.000	0.000	0.000	0.000	0.000	0.000	0.000	0.000	120	503	5424	5177	0.166	Error	Error	2868	2556	0	0	2740	2437	0	0	0	0
2	5	4	"PDR1"	"YGL013C"	7370	14840	120	2798	2878	1439	71	84	147	99	98	0	6588	6278	2731	289	317	252	98	97	0	0	0	0	0	0	0	0	0	0	0	0	0	0	0	0	0	0	0	0.433	0.469	0.439	0.479	1.453	0.450	0.888	0.000	0.000	0.000	0.000	0.000	0.000	0.000	0.000	0.000	0.000	0.000	0.000	0.000	0.000	120	510	9026	8796	-1.208	Error	Error	2727	6299	0	0	2807	5989	0	0	0	0
2	6	4	""	"YGL045W"	7580	14840	120	2121	3296	2691	70	84	145	100	96	0	3511	4948	3704	287	313	238	98	95	0	0	0	0	0	0	0	0	0	0	0	0	0	0	0	0	0	0	0	0.636	0.692	0.679	0.656	1.535	0.706	0.925	0.000	0.000	0.000	0.000	0.000	0.000	0.000	0.000	0.000	0.000	0.000	0.000	0.000	0.000	120	527	5275	7887	-0.653	Error	Error	2051	3224	0	0	3226	4661	0	0	0	0
2	7	4	"PRP31"	"YGR091W"	7770	14840	140	2149	1942	787	71	80	70	98	98	0	1577	1476	558	270	278	87	94	92	0	0	0	0	0	0	0	0	0	0	0	0	0	0	0	0	0	0	0	1.590	1.551	1.552	1.575	1.443	1.539	0.872	0.000	0.000	0.000	0.000	0.000	0.000	0.000	0.000	0.000	0.000	0.000	0.000	0.000	0.000	156	616	3385	3077	0.669	Error	Error	2078	1307	0	0	1871	1206	0	0	0	0
2	8	4	"MEP1"	"YGR121C"	7960	14850	120	2250	2232	1254	70	75	36	99	99	0	1332	1264	620	277	280	73	88	85	0	0	0	0	0	0	0	0	0	0	0	0	0	0	0	0	0	0	0	2.066	2.190	2.124	2.289	1.761	2.153	0.837	0.000	0.000	0.000	0.000	0.000	0.000	0.000	0.000	0.000	0.000	0.000	0.000	0.000	0.000	120	514	3235	3149	1.047	Error	Error	2180	1055	0	0	2162	987	0	0	0	0
2	9	4	"rsr1"	"YGR152C"	8160	14860	110	362	365	128	71	78	39	97	97	0	608	619	229	285	285	71	88	83	0	0	0	0	0	0	0	0	0	0	0	0	0	0	0	0	0	0	0	0.901	0.880	0.920	0.931	1.868	0.726	0.565	0.000	0.000	0.000	0.000	0.000	0.000	0.000	0.000	0.000	0.000	0.000	0.000	0.000	0.000	80	455	614	628	-0.151	Error	Error	291	323	0	0	294	334	0	0	0	0
2	10	4	""	"YGR093W"	8340	14850	130	1805	1622	651	71	75	30	100	100	0	1214	1185	441	280	281	71	94	94	0	0	0	0	0	0	0	0	0	0	0	0	0	0	0	0	0	0	0	1.857	1.714	1.709	1.759	1.580	1.624	0.828	0.000	0.000	0.000	0.000	0.000	0.000	0.000	0.000	0.000	0.000	0.000	0.000	0.000	0.000	120	563	2668	2456	0.893	Error	Error	1734	934	0	0	1551	905	0	0	0	0
2	11	4	""	"YGR122W"	8530	14850	130	2182	2001	852	71	74	28	100	100	0	3145	2900	1158	282	293	202	95	93	0	0	0	0	0	0	0	0	0	0	0	0	0	0	0	0	0	0	0	0.737	0.737	0.747	0.746	1.420	0.700	0.871	0.000	0.000	0.000	0.000	0.000	0.000	0.000	0.000	0.000	0.000	0.000	0.000	0.000	0.000	120	551	4974	4548	-0.440	Error	Error	2111	2863	0	0	1930	2618	0	0	0	0
2	12	4	""	"YGR154C"	8720	14850	130	2061	1885	693	73	74	26	100	100	0	1103	1061	401	279	317	625	72	11	0	0	0	0	0	0	0	0	0	0	0	0	0	0	0	0	0	0	0	2.413	2.317	2.293	2.448	1.562	2.190	0.668	0.000	0.000	0.000	0.000	0.000	0.000	0.000	0.000	0.000	0.000	0.000	0.000	0.000	0.000	120	562	2812	2594	1.271	Error	Error	1988	824	0	0	1812	782	0	0	0	0
2	13	4	"RRP46"	"YGR095C"	8910	14850	130	702	679	260	73	76	35	97	94	0	2909	2759	1162	270	309	613	89	85	0	0	0	0	0	0	0	0	0	0	0	0	0	0	0	0	0	0	0	0.238	0.243	0.240	0.252	1.516	0.181	0.684	0.000	0.000	0.000	0.000	0.000	0.000	0.000	0.000	0.000	0.000	0.000	0.000	0.000	0.000	120	533	3268	3095	-2.069	Error	Error	629	2639	0	0	606	2489	0	0	0	0
2	14	4	"ASN2"	"YGR124W"	9090	14850	130	2399	2266	839	76	81	40	100	100	0	1752	1746	608	276	292	109	97	96	0	0	0	0	0	0	0	0	0	0	0	0	0	0	0	0	0	0	0	1.574	1.490	1.510	1.527	1.415	1.475	0.868	0.000	0.000	0.000	0.000	0.000	0.000	0.000	0.000	0.000	0.000	0.000	0.000	0.000	0.000	120	511	3799	3660	0.654	Error	Error	2323	1476	0	0	2190	1470	0	0	0	0
2	15	4	""	"YGR156W"	9290	14850	140	1568	1522	633	75	79	40	99	99	0	827	809	269	286	297	109	91	87	0	0	0	0	0	0	0	0	0	0	0	0	0	0	0	0	0	0	0	2.760	2.767	2.741	2.835	1.670	2.892	0.731	0.000	0.000	0.000	0.000	0.000	0.000	0.000	0.000	0.000	0.000	0.000	0.000	0.000	0.000	156	555	2034	1970	1.465	Error	Error	1493	541	0	0	1447	523	0	0	0	0
2	16	4	"ASK10"	"YGR097W"	9480	14850	120	427	438	254	70	78	57	95	91	0	1228	1213	619	279	285	90	92	91	0	0	0	0	0	0	0	0	0	0	0	0	0	0	0	0	0	0	0	0.376	0.394	0.375	0.402	2.053	0.364	0.811	0.000	0.000	0.000	0.000	0.000	0.000	0.000	0.000	0.000	0.000	0.000	0.000	0.000	0.000	120	485	1306	1302	-1.410	Error	Error	357	949	0	0	368	934	0	0	0	0
2	17	4	""	"YGR126W"	9670	14850	130	923	897	316	70	72	24	100	100	0	1221	1182	411	277	279	73	95	94	0	0	0	0	0	0	0	0	0	0	0	0	0	0	0	0	0	0	0	0.904	0.914	0.899	0.925	1.435	0.843	0.863	0.000	0.000	0.000	0.000	0.000	0.000	0.000	0.000	0.000	0.000	0.000	0.000	0.000	0.000	120	494	1797	1732	-0.146	Error	Error	853	944	0	0	827	905	0	0	0	0
2	18	4	"MTR3"	"YGR158C"	9860	14850	140	1116	1028	397	72	76	38	97	96	0	3746	3523	1456	286	292	82	97	95	0	0	0	0	0	0	0	0	0	0	0	0	0	0	0	0	0	0	0	0.302	0.295	0.299	0.318	1.587	0.274	0.889	0.000	0.000	0.000	0.000	0.000	0.000	0.000	0.000	0.000	0.000	0.000	0.000	0.000	0.000	156	518	4504	4193	-1.729	Error	Error	1044	3460	0	0	956	3237	0	0	0	0
2	19	4	""	"YHR113W"	10050	14850	140	1474	1354	458	72	79	55	99	99	0	985	952	290	279	305	193	90	85	0	0	0	0	0	0	0	0	0	0	0	0	0	0	0	0	0	0	0	1.986	1.905	1.970	2.065	1.779	1.948	0.798	0.000	0.000	0.000	0.000	0.000	0.000	0.000	0.000	0.000	0.000	0.000	0.000	0.000	0.000	156	526	2108	1955	0.990	Error	Error	1402	706	0	0	1282	673	0	0	0	0
2	20	4	""	"YHR143W"	10240	14850	140	1246	1191	490	68	73	30	100	99	0	1125	1093	428	276	286	91	92	91	0	0	0	0	0	0	0	0	0	0	0	0	0	0	0	0	0	0	0	1.388	1.375	1.357	1.408	1.592	1.369	0.774	0.000	0.000	0.000	0.000	0.000	0.000	0.000	0.000	0.000	0.000	0.000	0.000	0.000	0.000	156	515	2027	1940	0.473	Error	Error	1178	849	0	0	1123	817	0	0	0	0
2	21	4	"ENO2"	"YHR174W"	10420	14850	130	1891	1785	673	72	108	222	99	92	0	2079	1941	748	282	351	427	90	83	0	0	0	0	0	0	0	0	0	0	0	0	0	0	0	0	0	0	0	1.012	1.033	1.042	1.134	1.774	0.970	0.875	0.000	0.000	0.000	0.000	0.000	0.000	0.000	0.000	0.000	0.000	0.000	0.000	0.000	0.000	120	497	3616	3372	0.018	Error	Error	1819	1797	0	0	1713	1659	0	0	0	0
2	22	4	""	"YHR115C"	10620	14850	140	1813	1695	586	74	89	106	99	95	0	3010	2683	981	281	321	298	94	91	0	0	0	0	0	0	0	0	0	0	0	0	0	0	0	0	0	0	0	0.637	0.675	0.658	0.709	1.630	0.639	0.899	0.000	0.000	0.000	0.000	0.000	0.000	0.000	0.000	0.000	0.000	0.000	0.000	0.000	0.000	156	729	4468	4023	-0.650	Error	Error	1739	2729	0	0	1621	2402	0	0	0	0
2	1	5	"DCD1"	"YHR144C"	6640	15040	130	3506	3144	1104	75	79	35	100	100	0	3744	3437	1151	283	291	86	99	98	0	0	0	0	0	0	0	0	0	0	0	0	0	0	0	0	0	0	0	0.991	0.973	1.005	0.967	1.373	0.950	0.897	0.000	0.000	0.000	0.000	0.000	0.000	0.000	0.000	0.000	0.000	0.000	0.000	0.000	0.000	120	583	6892	6223	-0.013	Error	Error	3431	3461	0	0	3069	3154	0	0	0	0
2	2	5	""	"YHR176W"	6830	15040	130	3718	3336	1153	77	83	50	100	100	0	3582	3267	1095	284	311	305	98	93	0	0	0	0	0	0	0	0	0	0	0	0	0	0	0	0	0	0	0	1.104	1.093	1.124	1.100	1.267	1.055	0.910	0.000	0.000	0.000	0.000	0.000	0.000	0.000	0.000	0.000	0.000	0.000	0.000	0.000	0.000	120	497	6939	6242	0.143	Error	Error	3641	3298	0	0	3259	2983	0	0	0	0
2	3	5	"TOM71"	"YHR117W"	7020	15040	130	2998	3059	1288	81	97	142	100	100	0	4521	4303	1629	291	374	740	98	95	0	0	0	0	0	0	0	0	0	0	0	0	0	0	0	0	0	0	0	0.690	0.742	0.739	0.745	1.314	0.733	0.912	0.000	0.000	0.000	0.000	0.000	0.000	0.000	0.000	0.000	0.000	0.000	0.000	0.000	0.000	120	497	7147	6990	-0.536	Error	Error	2917	4230	0	0	2978	4012	0	0	0	0
2	4	5	""	"YHR146W"	7200	15040	130	2657	2675	945	77	81	34	100	100	0	1502	1500	470	280	289	120	97	97	0	0	0	0	0	0	0	0	0	0	0	0	0	0	0	0	0	0	0	2.111	2.130	2.173	2.151	1.353	2.157	0.839	0.000	0.000	0.000	0.000	0.000	0.000	0.000	0.000	0.000	0.000	0.000	0.000	0.000	0.000	120	477	3802	3818	1.078	Error	Error	2580	1222	0	0	2598	1220	0	0	0	0
2	5	5	"STB5"	"YHR178W"	7390	15040	130	4710	4431	1441	71	79	54	100	100	0	2153	2072	649	284	297	119	99	99	0	0	0	0	0	0	0	0	0	0	0	0	0	0	0	0	0	0	0	2.482	2.438	2.410	2.445	1.343	2.395	0.893	0.000	0.000	0.000	0.000	0.000	0.000	0.000	0.000	0.000	0.000	0.000	0.000	0.000	0.000	120	469	6508	6148	1.312	Error	Error	4639	1869	0	0	4360	1788	0	0	0	0
2	6	5	"SET1"	"YHR119W"	7580	15050	150	5233	4686	2541	71	85	85	91	91	0	2349	2114	1136	279	292	102	83	82	0	0	0	0	0	0	0	0	0	0	0	0	0	0	0	0	0	0	0	2.494	2.515	2.472	2.517	2.238	2.459	0.916	0.000	0.000	0.000	0.000	0.000	0.000	0.000	0.000	0.000	0.000	0.000	0.000	0.000	0.000	156	530	7232	6450	1.318	Error	Error	5162	2070	0	0	4615	1835	0	0	0	0
2	7	5	"IMP3"	"YHR148W"	7780	15040	130	2046	1820	709	74	84	82	99	95	0	4675	4141	1733	265	270	70	99	97	0	0	0	0	0	0	0	0	0	0	0	0	0	0	0	0	0	0	0	0.447	0.450	0.459	0.490	1.523	0.425	0.910	0.000	0.000	0.000	0.000	0.000	0.000	0.000	0.000	0.000	0.000	0.000	0.000	0.000	0.000	120	433	6382	5622	-1.161	Error	Error	1972	4410	0	0	1746	3876	0	0	0	0
2	8	5	""	"YHR180W"	7960	15040	140	1161	1078	397	71	73	26	99	98	0	1551	1482	536	276	276	70	95	94	0	0	0	0	0	0	0	0	0	0	0	0	0	0	0	0	0	0	0	0.855	0.835	0.841	0.862	1.528	0.781	0.855	0.000	0.000	0.000	0.000	0.000	0.000	0.000	0.000	0.000	0.000	0.000	0.000	0.000	0.000	156	457	2365	2213	-0.226	Error	Error	1090	1275	0	0	1007	1206	0	0	0	0
2	9	5	""	"YJL049W"	8150	15040	140	1355	1368	589	73	81	67	98	98	0	5059	4902	2303	284	290	96	98	97	0	0	0	0	0	0	0	0	0	0	0	0	0	0	0	0	0	0	0	0.268	0.280	0.282	0.294	1.514	0.258	0.875	0.000	0.000	0.000	0.000	0.000	0.000	0.000	0.000	0.000	0.000	0.000	0.000	0.000	0.000	156	495	6057	5913	-1.897	Error	Error	1282	4775	0	0	1295	4618	0	0	0	0
2	10	5	"ARP4"	"YJL081C"	8330	15040	130	2221	2146	803	73	76	29	100	100	0	6724	6395	2416	283	288	74	100	100	0	0	0	0	0	0	0	0	0	0	0	0	0	0	0	0	0	0	0	0.333	0.339	0.341	0.343	1.327	0.319	0.901	0.000	0.000	0.000	0.000	0.000	0.000	0.000	0.000	0.000	0.000	0.000	0.000	0.000	0.000	120	486	8589	8185	-1.584	Error	Error	2148	6441	0	0	2073	6112	0	0	0	0
2	11	5	""	"YJL113W"	8530	15050	120	168	182	96	73	76	29	84	70	0	577	593	291	277	282	74	81	75	0	0	0	0	0	0	0	0	0	0	0	0	0	0	0	0	0	0	0	0.317	0.345	0.316	0.305	2.592	0.224	0.407	0.000	0.000	0.000	0.000	0.000	0.000	0.000	0.000	0.000	0.000	0.000	0.000	0.000	0.000	120	445	395	425	-1.659	Error	Error	95	300	0	0	109	316	0	0	0	0
2	12	5	""	"YJL051W"	8700	15040	130	2221	2414	1248	71	74	28	100	100	0	1120	1165	471	274	310	642	66	19	0	0	0	0	0	0	0	0	0	0	0	0	0	0	0	0	0	0	0	2.541	2.630	2.681	2.779	1.617	2.761	0.838	0.000	0.000	0.000	0.000	0.000	0.000	0.000	0.000	0.000	0.000	0.000	0.000	0.000	0.000	120	485	2996	3234	1.346	Error	Error	2150	846	0	0	2343	891	0	0	0	0
2	13	5	""	"YJL083W"	8900	15040	130	1573	1633	747	71	74	28	100	99	0	836	842	318	270	311	653	36	1	0	0	0	0	0	0	0	0	0	0	0	0	0	0	0	0	0	0	0	2.654	2.731	2.647	2.871	1.729	1.365	0.125	0.000	0.000	0.000	0.000	0.000	0.000	0.000	0.000	0.000	0.000	0.000	0.000	0.000	0.000	120	468	2068	2134	1.408	Error	Error	1502	566	0	0	1562	572	0	0	0	0
2	14	5	"asf1"	"YJL115W"	9080	15040	140	2230	2010	712	75	80	41	99	99	0	1374	1273	453	277	290	104	94	91	0	0	0	0	0	0	0	0	0	0	0	0	0	0	0	0	0	0	0	1.964	1.943	1.954	2.043	1.686	1.881	0.868	0.000	0.000	0.000	0.000	0.000	0.000	0.000	0.000	0.000	0.000	0.000	0.000	0.000	0.000	156	494	3252	2931	0.974	Error	Error	2155	1097	0	0	1935	996	0	0	0	0
2	15	5	"PEP8"	"YJL053W"	9270	15030	130	1810	1718	554	73	77	39	100	100	0	933	932	290	283	287	95	93	91	0	0	0	0	0	0	0	0	0	0	0	0	0	0	0	0	0	0	0	2.672	2.535	2.578	2.755	1.772	2.641	0.778	0.000	0.000	0.000	0.000	0.000	0.000	0.000	0.000	0.000	0.000	0.000	0.000	0.000	0.000	120	477	2387	2294	1.418	Error	Error	1737	650	0	0	1645	649	0	0	0	0
2	16	5	"EXO70"	"YJL085W"	9460	15040	130	2157	1954	772	69	81	100	99	99	0	3341	3059	1219	274	294	207	95	92	0	0	0	0	0	0	0	0	0	0	0	0	0	0	0	0	0	0	0	0.681	0.677	0.688	0.727	1.540	0.648	0.903	0.000	0.000	0.000	0.000	0.000	0.000	0.000	0.000	0.000	0.000	0.000	0.000	0.000	0.000	120	477	5155	4670	-0.555	Error	Error	2088	3067	0	0	1885	2785	0	0	0	0
2	17	5	"PHO86"	"YJL117W"	9640	15030	130	1808	1680	693	70	72	26	100	99	0	905	872	335	270	279	78	90	90	0	0	0	0	0	0	0	0	0	0	0	0	0	0	0	0	0	0	0	2.737	2.674	2.668	2.656	1.514	2.635	0.788	0.000	0.000	0.000	0.000	0.000	0.000	0.000	0.000	0.000	0.000	0.000	0.000	0.000	0.000	120	478	2373	2212	1.453	Error	Error	1738	635	0	0	1610	602	0	0	0	0
2	18	5	""	"YJL055W"	9830	15030	130	2511	2321	736	72	80	84	100	99	0	839	831	261	282	294	90	92	91	0	0	0	0	0	0	0	0	0	0	0	0	0	0	0	0	0	0	0	4.379	4.097	4.267	4.093	1.462	4.107	0.776	0.000	0.000	0.000	0.000	0.000	0.000	0.000	0.000	0.000	0.000	0.000	0.000	0.000	0.000	120	472	2996	2798	2.131	Error	Error	2439	557	0	0	2249	549	0	0	0	0
2	19	5	"TRL1"	"YJL087C"	10020	15030	130	1374	1650	1014	75	82	85	100	98	0	1889	2027	1046	284	294	97	94	92	0	0	0	0	0	0	0	0	0	0	0	0	0	0	0	0	0	0	0	0.809	0.904	0.912	0.920	1.527	0.914	0.842	0.000	0.000	0.000	0.000	0.000	0.000	0.000	0.000	0.000	0.000	0.000	0.000	0.000	0.000	120	485	2904	3318	-0.305	Error	Error	1299	1605	0	0	1575	1743	0	0	0	0
2	20	5	""	"YJL119C"	10220	15040	130	631	617	247	72	74	33	97	96	0	557	558	190	280	281	85	86	70	0	0	0	0	0	0	0	0	0	0	0	0	0	0	0	0	0	0	0	2.018	1.960	1.851	1.988	2.394	1.778	0.596	0.000	0.000	0.000	0.000	0.000	0.000	0.000	0.000	0.000	0.000	0.000	0.000	0.000	0.000	120	457	836	823	1.013	Error	Error	559	277	0	0	545	278	0	0	0	0
2	21	5	"PHD1"	"YKL043W"	10390	15030	130	3756	3451	1021	73	139	419	99	98	0	1423	1382	391	283	317	220	96	92	0	0	0	0	0	0	0	0	0	0	0	0	0	0	0	0	0	0	0	3.231	3.074	3.049	3.166	1.474	3.070	0.869	0.000	0.000	0.000	0.000	0.000	0.000	0.000	0.000	0.000	0.000	0.000	0.000	0.000	0.000	120	460	4823	4477	1.692	Error	Error	3683	1140	0	0	3378	1099	0	0	0	0
2	22	5	"MUD2"	"YKL074C"	10590	15030	130	2919	2692	856	76	136	379	99	95	0	1297	1250	374	282	324	240	94	89	0	0	0	0	0	0	0	0	0	0	0	0	0	0	0	0	0	0	0	2.801	2.702	2.635	2.789	1.445	2.767	0.835	0.000	0.000	0.000	0.000	0.000	0.000	0.000	0.000	0.000	0.000	0.000	0.000	0.000	0.000	120	611	3858	3584	1.486	Error	Error	2843	1015	0	0	2616	968	0	0	0	0
2	1	6	""	"YKL105C"	6610	15220	140	2973	3343	2335	72	74	30	99	98	0	6229	6886	4457	277	282	73	98	98	0	0	0	0	0	0	0	0	0	0	0	0	0	0	0	0	0	0	0	0.487	0.495	0.508	0.522	1.800	0.483	0.876	0.000	0.000	0.000	0.000	0.000	0.000	0.000	0.000	0.000	0.000	0.000	0.000	0.000	0.000	156	659	8853	9880	-1.037	Error	Error	2901	5952	0	0	3271	6609	0	0	0	0
2	2	6	"PRI2"	"YKL045W"	6790	15220	140	3772	3484	1254	78	81	34	99	99	0	1868	1744	644	281	289	95	97	94	0	0	0	0	0	0	0	0	0	0	0	0	0	0	0	0	0	0	0	2.328	2.328	2.369	2.383	1.851	2.310	0.885	0.000	0.000	0.000	0.000	0.000	0.000	0.000	0.000	0.000	0.000	0.000	0.000	0.000	0.000	156	436	5281	4869	1.219	Error	Error	3694	1587	0	0	3406	1463	0	0	0	0
2	3	6	""	"YKL076C"	6970	15220	130	2156	1921	695	81	116	223	97	92	0	8197	7601	2707	291	508	1246	95	89	0	0	0	0	0	0	0	0	0	0	0	0	0	0	0	0	0	0	0	0.262	0.252	0.249	0.250	1.298	0.236	0.904	0.000	0.000	0.000	0.000	0.000	0.000	0.000	0.000	0.000	0.000	0.000	0.000	0.000	0.000	120	458	9981	9150	-1.930	Error	Error	2075	7906	0	0	1840	7310	0	0	0	0
2	4	6	""	"YKL107W"	7170	15220	150	129	153	95	78	109	208	10	0	0	426	507	259	289	474	1162	0	0	0	0	0	0	0	0	0	0	0	0	0	0	0	0	0	0	0	0	0	0.372	0.344	0.333	0.310	3.179	0.171	0.848	0.000	0.000	0.000	0.000	0.000	0.000	0.000	0.000	0.000	0.000	0.000	0.000	0.000	0.000	156	528	188	293	-1.426	Error	Error	51	137	0	0	75	218	0	0	-50	0
2	5	6	""	"YKL047W"	7360	15220	140	3465	3244	1256	77	82	46	100	99	0	3458	3194	1226	283	289	81	98	96	0	0	0	0	0	0	0	0	0	0	0	0	0	0	0	0	0	0	0	1.067	1.088	1.116	1.112	1.478	1.075	0.900	0.000	0.000	0.000	0.000	0.000	0.000	0.000	0.000	0.000	0.000	0.000	0.000	0.000	0.000	156	446	6563	6078	0.094	Error	Error	3388	3175	0	0	3167	2911	0	0	0	0
2	6	6	""	"YKL078W"	7540	15220	140	4196	4194	1630	80	87	51	99	99	0	2624	2515	1028	292	297	87	96	95	0	0	0	0	0	0	0	0	0	0	0	0	0	0	0	0	0	0	0	1.765	1.851	1.822	1.992	1.623	1.819	0.883	0.000	0.000	0.000	0.000	0.000	0.000	0.000	0.000	0.000	0.000	0.000	0.000	0.000	0.000	156	410	6448	6337	0.820	Error	Error	4116	2332	0	0	4114	2223	0	0	0	0
2	7	6	"HAP4"	"YKL109W"	7730	15220	140	1862	1711	595	79	87	60	99	99	0	1146	1075	375	284	285	72	92	91	0	0	0	0	0	0	0	0	0	0	0	0	0	0	0	0	0	0	0	2.068	2.063	2.086	2.205	1.808	2.000	0.834	0.000	0.000	0.000	0.000	0.000	0.000	0.000	0.000	0.000	0.000	0.000	0.000	0.000	0.000	156	476	2645	2423	1.049	Error	Error	1783	862	0	0	1632	791	0	0	0	0
2	8	6	"CSE4"	"YKL049C"	7930	15220	140	1696	1541	572	76	78	28	98	98	0	1089	985	367	282	283	70	91	89	0	0	0	0	0	0	0	0	0	0	0	0	0	0	0	0	0	0	0	2.007	2.084	2.092	2.160	1.839	2.028	0.789	0.000	0.000	0.000	0.000	0.000	0.000	0.000	0.000	0.000	0.000	0.000	0.000	0.000	0.000	156	472	2427	2168	1.005	Error	Error	1620	807	0	0	1465	703	0	0	0	0
2	9	6	"VMA5"	"YKL080W"	8110	15220	130	1305	1152	390	76	87	89	98	95	0	1014	933	287	284	299	113	95	91	0	0	0	0	0	0	0	0	0	0	0	0	0	0	0	0	0	0	0	1.684	1.658	1.655	1.665	1.560	1.643	0.793	0.000	0.000	0.000	0.000	0.000	0.000	0.000	0.000	0.000	0.000	0.000	0.000	0.000	0.000	120	455	1959	1725	0.752	Error	Error	1229	730	0	0	1076	649	0	0	0	0
2	10	6	""	"YKL111C"	8310	15220	130	230	233	97	77	86	85	76	40	0	780	761	278	283	300	111	89	82	0	0	0	0	0	0	0	0	0	0	0	0	0	0	0	0	0	0	0	0.308	0.326	0.332	0.333	2.249	0.333	0.527	0.000	0.000	0.000	0.000	0.000	0.000	0.000	0.000	0.000	0.000	0.000	0.000	0.000	0.000	120	514	650	634	-1.700	Error	Error	153	497	0	0	156	478	0	0	0	0
2	11	6	"snf7"	"YLR025W"	8490	15220	130	1666	1674	685	72	75	29	99	98	0	1746	1748	744	278	286	82	95	94	0	0	0	0	0	0	0	0	0	0	0	0	0	0	0	0	0	0	0	1.086	1.090	1.110	1.133	1.443	1.035	0.879	0.000	0.000	0.000	0.000	0.000	0.000	0.000	0.000	0.000	0.000	0.000	0.000	0.000	0.000	120	478	3062	3072	0.119	Error	Error	1594	1468	0	0	1602	1470	0	0	0	0
2	12	6	"ERG3"	"YLR056W"	8680	15220	130	1742	1600	609	72	151	458	93	80	0	926	891	301	279	328	349	82	41	0	0	0	0	0	0	0	0	0	0	0	0	0	0	0	0	0	0	0	2.581	2.497	2.468	2.530	1.500	2.567	0.771	0.000	0.000	0.000	0.000	0.000	0.000	0.000	0.000	0.000	0.000	0.000	0.000	0.000	0.000	120	505	2317	2140	1.368	Error	Error	1670	647	0	0	1528	612	0	0	0	0
2	13	6	"GAA1"	"YLR088W"	8870	15220	140	2067	2043	937	74	119	313	93	88	0	2331	2239	1110	278	318	291	87	84	0	0	0	0	0	0	0	0	0	0	0	0	0	0	0	0	0	0	0	0.971	1.004	0.987	1.084	1.924	0.941	0.820	0.000	0.000	0.000	0.000	0.000	0.000	0.000	0.000	0.000	0.000	0.000	0.000	0.000	0.000	156	565	4046	3930	-0.043	Error	Error	1993	2053	0	0	1969	1961	0	0	0	0
2	14	6	"AAT2"	"YLR027C"	9060	15220	130	1249	1226	495	76	82	48	100	100	0	994	942	320	278	284	95	93	90	0	0	0	0	0	0	0	0	0	0	0	0	0	0	0	0	0	0	0	1.638	1.732	1.642	1.730	1.455	1.687	0.812	0.000	0.000	0.000	0.000	0.000	0.000	0.000	0.000	0.000	0.000	0.000	0.000	0.000	0.000	120	510	1889	1814	0.712	Error	Error	1173	716	0	0	1150	664	0	0	0	0
2	15	6	"SHM2"	"YLR058C"	9250	15220	130	1437	1387	620	73	80	55	98	97	0	3494	3496	1607	281	305	215	97	95	0	0	0	0	0	0	0	0	0	0	0	0	0	0	0	0	0	0	0	0.425	0.409	0.423	0.422	1.646	0.379	0.868	0.000	0.000	0.000	0.000	0.000	0.000	0.000	0.000	0.000	0.000	0.000	0.000	0.000	0.000	120	542	4577	4529	-1.236	Error	Error	1364	3213	0	0	1314	3215	0	0	0	0
2	16	6	"XDJ1"	"YLR090W"	9440	15220	130	2026	1989	946	71	97	184	95	90	0	2411	2337	1152	287	347	362	87	82	0	0	0	0	0	0	0	0	0	0	0	0	0	0	0	0	0	0	0	0.920	0.936	0.916	0.995	1.674	0.883	0.858	0.000	0.000	0.000	0.000	0.000	0.000	0.000	0.000	0.000	0.000	0.000	0.000	0.000	0.000	120	519	4079	3968	-0.120	Error	Error	1955	2124	0	0	1918	2050	0	0	0	0
2	17	6	"RPL15A"	"YLR029C"	9630	15220	140	1040	1026	447	72	93	175	92	87	0	813	793	325	284	326	296	75	42	0	0	0	0	0	0	0	0	0	0	0	0	0	0	0	0	0	0	0	1.830	1.874	1.737	1.993	1.801	1.360	0.637	0.000	0.000	0.000	0.000	0.000	0.000	0.000	0.000	0.000	0.000	0.000	0.000	0.000	0.000	156	560	1497	1463	0.872	Error	Error	968	529	0	0	954	509	0	0	0	0
2	18	6	"FRS1"	"YLR060W"	9840	15220	140	1507	1404	591	71	79	80	99	97	0	720	698	237	276	285	87	91	83	0	0	0	0	0	0	0	0	0	0	0	0	0	0	0	0	0	0	0	3.234	3.159	3.054	3.217	1.619	3.294	0.718	0.000	0.000	0.000	0.000	0.000	0.000	0.000	0.000	0.000	0.000	0.000	0.000	0.000	0.000	156	539	1880	1755	1.693	Error	Error	1436	444	0	0	1333	422	0	0	0	0
2	19	6	"SUL2"	"YLR092W"	10020	15220	130	1604	1684	839	73	85	94	97	97	0	2246	2138	954	280	308	243	93	88	0	0	0	0	0	0	0	0	0	0	0	0	0	0	0	0	0	0	0	0.779	0.867	0.875	0.926	1.715	0.830	0.833	0.000	0.000	0.000	0.000	0.000	0.000	0.000	0.000	0.000	0.000	0.000	0.000	0.000	0.000	120	551	3497	3469	-0.361	Error	Error	1531	1966	0	0	1611	1858	0	0	0	0
2	20	6	""	"YLR031W"	10220	15220	140	1147	1040	378	72	82	90	98	94	0	667	655	243	283	305	236	72	33	0	0	0	0	0	0	0	0	0	0	0	0	0	0	0	0	0	0	0	2.799	2.602	2.508	2.853	1.900	1.910	0.438	0.000	0.000	0.000	0.000	0.000	0.000	0.000	0.000	0.000	0.000	0.000	0.000	0.000	0.000	156	593	1459	1340	1.485	Error	Error	1075	384	0	0	968	372	0	0	0	0
2	21	6	""	"YLR062C"	10410	15220	130	437	419	142	70	107	320	66	0	0	627	615	221	278	294	161	77	60	0	0	0	0	0	0	0	0	0	0	0	0	0	0	0	0	0	0	0	1.052	1.036	0.980	1.057	1.829	0.855	0.668	0.000	0.000	0.000	0.000	0.000	0.000	0.000	0.000	0.000	0.000	0.000	0.000	0.000	0.000	120	557	716	686	0.073	Error	Error	367	349	0	0	349	337	0	0	0	0
2	22	6	"GIS3"	"YLR094C"	10600	15220	130	1247	1250	540	75	82	95	97	95	0	682	678	258	273	283	110	85	79	0	0	0	0	0	0	0	0	0	0	0	0	0	0	0	0	0	0	0	2.866	2.901	2.872	3.047	1.614	2.827	0.727	0.000	0.000	0.000	0.000	0.000	0.000	0.000	0.000	0.000	0.000	0.000	0.000	0.000	0.000	120	664	1581	1580	1.519	Error	Error	1172	409	0	0	1175	405	0	0	0	0
2	1	7	""	"YLR400W"	6620	15410	130	2616	2347	936	72	74	27	99	99	0	1079	1067	416	274	280	70	90	89	0	0	0	0	0	0	0	0	0	0	0	0	0	0	0	0	0	0	0	3.160	2.869	2.831	2.994	1.520	2.840	0.826	0.000	0.000	0.000	0.000	0.000	0.000	0.000	0.000	0.000	0.000	0.000	0.000	0.000	0.000	120	553	3349	3068	1.660	Error	Error	2544	805	0	0	2275	793	0	0	0	0
2	2	7	"sen1"	"YLR430W"	6790	15410	150	103	116	60	76	81	37	42	23	0	311	327	133	274	283	93	34	11	0	0	0	0	0	0	0	0	0	0	0	0	0	0	0	0	0	0	0	0.730	0.755	0.433	0.456	4.338	0.176	0.096	0.000	0.000	0.000	0.000	0.000	0.000	0.000	0.000	0.000	0.000	0.000	0.000	0.000	0.000	156	547	64	93	-0.455	Error	Error	27	37	0	0	40	53	0	0	-50	0
2	3	7	"PAU4"	"YLR461W"	7000	15410	130	5410	5454	3379	76	94	153	100	96	0	7135	7293	4562	281	382	879	86	82	0	0	0	0	0	0	0	0	0	0	0	0	0	0	0	0	0	0	0	0.778	0.767	0.770	0.844	1.641	0.741	0.914	0.000	0.000	0.000	0.000	0.000	0.000	0.000	0.000	0.000	0.000	0.000	0.000	0.000	0.000	120	589	12188	12390	-0.362	Error	Error	5334	6854	0	0	5378	7012	0	0	0	0
2	4	7	""	"YLR402W"	7190	15410	130	1764	1803	889	73	77	29	100	100	0	869	865	347	274	276	77	90	85	0	0	0	0	0	0	0	0	0	0	0	0	0	0	0	0	0	0	0	2.842	2.927	2.895	3.094	1.664	2.850	0.835	0.000	0.000	0.000	0.000	0.000	0.000	0.000	0.000	0.000	0.000	0.000	0.000	0.000	0.000	120	513	2286	2321	1.507	Error	Error	1691	595	0	0	1730	591	0	0	0	0
2	5	7	""	"YLR432W"	7380	15410	130	6561	6774	3629	77	80	36	100	100	0	8885	9067	4545	275	285	131	100	100	0	0	0	0	0	0	0	0	0	0	0	0	0	0	0	0	0	0	0	0.753	0.762	0.774	0.755	1.359	0.742	0.904	0.000	0.000	0.000	0.000	0.000	0.000	0.000	0.000	0.000	0.000	0.000	0.000	0.000	0.000	120	519	15094	15489	-0.409	Error	Error	6484	8610	0	0	6697	8792	0	0	0	0
2	6	7	""	"YLR463C"	7570	15410	130	12842	11796	5170	82	87	43	100	100	0	5487	5173	2163	289	299	139	99	97	0	0	0	0	0	0	0	0	0	0	0	0	0	0	0	0	0	0	0	2.455	2.398	2.422	2.431	1.397	2.437	0.907	0.000	0.000	0.000	0.000	0.000	0.000	0.000	0.000	0.000	0.000	0.000	0.000	0.000	0.000	120	505	17958	16598	1.296	Error	Error	12760	5198	0	0	11714	4884	0	0	0	0
2	7	7	""	"YLR404W"	7760	15420	130	1739	1635	660	78	82	36	100	99	0	2118	2062	904	281	288	85	94	92	0	0	0	0	0	0	0	0	0	0	0	0	0	0	0	0	0	0	0	0.904	0.874	0.871	0.955	1.664	0.772	0.860	0.000	0.000	0.000	0.000	0.000	0.000	0.000	0.000	0.000	0.000	0.000	0.000	0.000	0.000	120	534	3498	3338	-0.145	Error	Error	1661	1837	0	0	1557	1781	0	0	0	0
2	8	7	""	"YLR434C"	7950	15410	130	1029	1028	455	75	78	30	99	97	0	1391	1307	541	275	283	74	95	91	0	0	0	0	0	0	0	0	0	0	0	0	0	0	0	0	0	0	0	0.855	0.923	0.958	0.962	1.464	0.852	0.825	0.000	0.000	0.000	0.000	0.000	0.000	0.000	0.000	0.000	0.000	0.000	0.000	0.000	0.000	120	566	2070	1985	-0.226	Error	Error	954	1116	0	0	953	1032	0	0	0	0
2	9	7	""	"YLR465C"	8140	15420	120	8162	7671	4392	74	81	61	100	100	0	4107	3824	2132	281	288	86	93	91	0	0	0	0	0	0	0	0	0	0	0	0	0	0	0	0	0	0	0	2.114	2.144	2.166	2.236	1.696	2.159	0.926	0.000	0.000	0.000	0.000	0.000	0.000	0.000	0.000	0.000	0.000	0.000	0.000	0.000	0.000	120	533	11914	11140	1.080	Error	Error	8088	3826	0	0	7597	3543	0	0	0	0
2	10	7	"RPL31B"	"YLR406C"	8340	15420	120	251	260	124	73	76	30	94	88	0	522	517	210	278	282	75	77	64	0	0	0	0	0	0	0	0	0	0	0	0	0	0	0	0	0	0	0	0.730	0.782	0.721	0.716	2.780	0.505	0.442	0.000	0.000	0.000	0.000	0.000	0.000	0.000	0.000	0.000	0.000	0.000	0.000	0.000	0.000	120	526	422	426	-0.455	Error	Error	178	244	0	0	187	239	0	0	0	0
2	11	7	"ECM30"	"YLR436C"	8530	15410	130	1416	1694	1116	72	106	330	95	90	0	1446	1572	812	279	290	195	95	92	0	0	0	0	0	0	0	0	0	0	0	0	0	0	0	0	0	0	0	1.152	1.254	1.237	1.300	1.647	1.315	0.832	0.000	0.000	0.000	0.000	0.000	0.000	0.000	0.000	0.000	0.000	0.000	0.000	0.000	0.000	120	561	2511	2915	0.204	Error	Error	1344	1167	0	0	1622	1293	0	0	0	0
2	12	7	"YRF1-5"	"YLR467W"	8710	15430	110	7863	7309	4968	76	181	547	97	92	0	6153	5781	3362	283	359	502	96	91	0	0	0	0	0	0	0	0	0	0	0	0	0	0	0	0	0	0	0	1.327	1.316	1.295	1.298	1.419	1.384	0.853	0.000	0.000	0.000	0.000	0.000	0.000	0.000	0.000	0.000	0.000	0.000	0.000	0.000	0.000	80	473	13657	12731	0.408	Error	Error	7787	5870	0	0	7233	5498	0	0	0	0
2	13	7	""	"YMR160W"	8910	15420	130	3755	3508	1284	76	116	302	100	98	0	2360	2305	806	278	321	351	97	94	0	0	0	0	0	0	0	0	0	0	0	0	0	0	0	0	0	0	0	1.767	1.693	1.704	1.709	1.380	1.660	0.855	0.000	0.000	0.000	0.000	0.000	0.000	0.000	0.000	0.000	0.000	0.000	0.000	0.000	0.000	120	604	5761	5459	0.821	Error	Error	3679	2082	0	0	3432	2027	0	0	0	0
2	14	7	"SGS1"	"YMR190C"	9090	15420	90	144	158	70	76	80	36	75	46	0	434	423	160	283	292	83	67	38	0	0	0	0	0	0	0	0	0	0	0	0	0	0	0	0	0	0	0	0.450	0.586	0.479	0.479	2.973	0.257	0.196	0.000	0.000	0.000	0.000	0.000	0.000	0.000	0.000	0.000	0.000	0.000	0.000	0.000	0.000	52	364	219	222	-1.151	Error	Error	68	151	0	0	82	140	0	0	0	0
2	15	7	"ERG8"	"YMR220W"	9280	15420	130	3178	2995	1288	74	94	144	100	97	0	5141	4852	2207	285	343	451	94	90	0	0	0	0	0	0	0	0	0	0	0	0	0	0	0	0	0	0	0	0.639	0.640	0.641	0.681	1.465	0.592	0.884	0.000	0.000	0.000	0.000	0.000	0.000	0.000	0.000	0.000	0.000	0.000	0.000	0.000	0.000	120	614	7960	7488	-0.646	Error	Error	3104	4856	0	0	2921	4567	0	0	0	0
2	16	7	""	"YMR162C"	9480	15420	120	141	151	59	72	100	193	3	0	0	500	506	133	291	363	498	1	0	0	0	0	0	0	0	0	0	0	0	0	0	0	0	0	0	0	0	0	0.330	0.367	0.335	0.332	2.295	0.249	0.783	0.000	0.000	0.000	0.000	0.000	0.000	0.000	0.000	0.000	0.000	0.000	0.000	0.000	0.000	120	522	278	294	-1.599	Error	Error	69	209	0	0	79	215	0	0	0	0
2	17	7	""	"YMR192W"	9670	15420	130	2279	2340	1155	72	74	29	100	100	0	1110	1127	444	285	290	77	94	91	0	0	0	0	0	0	0	0	0	0	0	0	0	0	0	0	0	0	0	2.675	2.694	2.536	2.735	1.458	2.718	0.825	0.000	0.000	0.000	0.000	0.000	0.000	0.000	0.000	0.000	0.000	0.000	0.000	0.000	0.000	120	483	3032	3110	1.420	Error	Error	2207	825	0	0	2268	842	0	0	0	0
2	18	7	""	"YMR222C"	9840	15410	150	86	96	47	72	77	38	23	9	0	289	301	105	276	282	78	27	10	0	0	0	0	0	0	0	0	0	0	0	0	0	0	0	0	0	0	0	1.077	0.960	0.301	0.345	3.723	0.135	0.070	0.000	0.000	0.000	0.000	0.000	0.000	0.000	0.000	0.000	0.000	0.000	0.000	0.000	0.000	156	607	27	49	0.107	Error	Error	14	13	0	0	24	25	0	0	-50	0
2	19	7	"MSS11"	"YMR164C"	10050	15430	110	153	156	52	73	77	30	85	70	0	390	390	125	271	278	77	66	30	0	0	0	0	0	0	0	0	0	0	0	0	0	0	0	0	0	0	0	0.672	0.697	0.618	0.625	2.954	0.286	0.229	0.000	0.000	0.000	0.000	0.000	0.000	0.000	0.000	0.000	0.000	0.000	0.000	0.000	0.000	80	473	199	202	-0.573	Error	Error	80	119	0	0	83	119	0	0	0	0
2	20	7	"MRPL24"	"YMR193W"	10230	15420	130	1295	1228	460	74	82	66	98	95	0	730	715	250	278	286	95	90	85	0	0	0	0	0	0	0	0	0	0	0	0	0	0	0	0	0	0	0	2.701	2.641	2.753	2.751	1.536	2.455	0.763	0.000	0.000	0.000	0.000	0.000	0.000	0.000	0.000	0.000	0.000	0.000	0.000	0.000	0.000	120	569	1673	1591	1.434	Error	Error	1221	452	0	0	1154	437	0	0	0	0
2	21	7	"MRE11"	"YMR224C"	10430	15430	130	321	324	165	75	83	68	87	75	0	665	691	320	278	283	96	86	80	0	0	0	0	0	0	0	0	0	0	0	0	0	0	0	0	0	0	0	0.636	0.603	0.619	0.611	2.000	0.503	0.639	0.000	0.000	0.000	0.000	0.000	0.000	0.000	0.000	0.000	0.000	0.000	0.000	0.000	0.000	120	526	633	662	-0.654	Error	Error	246	387	0	0	249	413	0	0	0	0
2	22	7	""	"YMR166C"	10610	15420	130	2725	2483	867	77	89	106	100	100	0	1119	1038	378	278	288	122	92	89	0	0	0	0	0	0	0	0	0	0	0	0	0	0	0	0	0	0	0	3.149	3.166	3.105	3.324	1.544	2.988	0.827	0.000	0.000	0.000	0.000	0.000	0.000	0.000	0.000	0.000	0.000	0.000	0.000	0.000	0.000	120	624	3489	3166	1.655	Error	Error	2648	841	0	0	2406	760	0	0	0	0
2	1	8	"RPL36A"	"YMR194W"	6630	15600	130	2853	2616	1134	73	79	67	100	98	0	1382	1327	539	280	289	99	90	89	0	0	0	0	0	0	0	0	0	0	0	0	0	0	0	0	0	0	0	2.523	2.429	2.455	2.742	1.812	2.375	0.869	0.000	0.000	0.000	0.000	0.000	0.000	0.000	0.000	0.000	0.000	0.000	0.000	0.000	0.000	120	614	3882	3590	1.335	Error	Error	2780	1102	0	0	2543	1047	0	0	0	0
2	2	8	""	"YMR226C"	6820	15610	130	3675	3516	2354	75	86	86	95	91	0	2199	2051	1270	269	286	146	82	79	0	0	0	0	0	0	0	0	0	0	0	0	0	0	0	0	0	0	0	1.865	1.931	1.914	1.909	1.564	1.955	0.863	0.000	0.000	0.000	0.000	0.000	0.000	0.000	0.000	0.000	0.000	0.000	0.000	0.000	0.000	120	572	5530	5223	0.899	Error	Error	3600	1930	0	0	3441	1782	0	0	0	0
2	3	8	""	"YNL207W"	7030	15610	100	151	153	62	73	76	29	80	63	0	391	410	153	268	273	77	68	46	0	0	0	0	0	0	0	0	0	0	0	0	0	0	0	0	0	0	0	0.634	0.563	0.493	0.523	2.993	0.250	0.261	0.000	0.000	0.000	0.000	0.000	0.000	0.000	0.000	0.000	0.000	0.000	0.000	0.000	0.000	80	418	201	222	-0.657	Error	Error	78	123	0	0	80	142	0	0	0	0
2	4	8	"lap3"	"YNL239W"	7200	15600	130	2926	2848	981	73	82	88	100	100	0	1213	1171	348	274	304	473	89	49	0	0	0	0	0	0	0	0	0	0	0	0	0	0	0	0	0	0	0	3.038	3.094	3.039	3.201	1.362	3.082	0.889	0.000	0.000	0.000	0.000	0.000	0.000	0.000	0.000	0.000	0.000	0.000	0.000	0.000	0.000	120	546	3792	3672	1.603	Error	Error	2853	939	0	0	2775	897	0	0	0	0
2	5	8	"bni1"	"YNL271C"	7400	15610	130	227	228	80	72	85	93	79	33	0	492	483	155	280	320	502	0	0	0	0	0	0	0	0	0	0	0	0	0	0	0	0	0	0	0	0	0	0.731	0.768	0.683	0.789	2.402	0.689	0.462	0.000	0.000	0.000	0.000	0.000	0.000	0.000	0.000	0.000	0.000	0.000	0.000	0.000	0.000	120	526	367	359	-0.452	Error	Error	155	212	0	0	156	203	0	0	0	0
2	6	8	"SSB2"	"YNL209W"	7580	15600	130	2861	2676	1086	76	81	52	100	99	0	2592	2437	976	285	298	141	95	92	0	0	0	0	0	0	0	0	0	0	0	0	0	0	0	0	0	0	0	1.207	1.208	1.209	1.278	1.626	1.161	0.886	0.000	0.000	0.000	0.000	0.000	0.000	0.000	0.000	0.000	0.000	0.000	0.000	0.000	0.000	120	531	5092	4752	0.272	Error	Error	2785	2307	0	0	2600	2152	0	0	0	0
2	7	8	"zwf1"	"YNL241C"	7780	15610	130	1718	1609	551	76	81	51	100	100	0	4648	4462	1376	275	292	137	100	100	0	0	0	0	0	0	0	0	0	0	0	0	0	0	0	0	0	0	0	0.375	0.366	0.368	0.358	1.319	0.358	0.909	0.000	0.000	0.000	0.000	0.000	0.000	0.000	0.000	0.000	0.000	0.000	0.000	0.000	0.000	120	566	6015	5720	-1.413	Error	Error	1642	4373	0	0	1533	4187	0	0	0	0
2	8	8	"TOF1"	"YNL273W"	7960	15620	110	291	306	137	73	78	32	98	98	0	675	721	436	270	279	86	93	86	0	0	0	0	0	0	0	0	0	0	0	0	0	0	0	0	0	0	0	0.538	0.517	0.524	0.590	2.070	0.320	0.460	0.000	0.000	0.000	0.000	0.000	0.000	0.000	0.000	0.000	0.000	0.000	0.000	0.000	0.000	80	498	623	684	-0.894	Error	Error	218	405	0	0	233	451	0	0	0	0
2	9	8	""	"YNL211C"	8160	15610	130	1111	1041	371	73	76	30	100	100	0	2078	1951	692	275	281	79	96	95	0	0	0	0	0	0	0	0	0	0	0	0	0	0	0	0	0	0	0	0.576	0.578	0.588	0.640	2.029	0.549	0.868	0.000	0.000	0.000	0.000	0.000	0.000	0.000	0.000	0.000	0.000	0.000	0.000	0.000	0.000	120	514	2841	2644	-0.797	Error	Error	1038	1803	0	0	968	1676	0	0	0	0
2	10	8	"SLA2"	"YNL243W"	8330	15610	130	1605	1870	1256	70	74	33	100	100	0	842	908	442	269	277	81	90	90	0	0	0	0	0	0	0	0	0	0	0	0	0	0	0	0	0	0	0	2.679	2.817	2.608	2.943	1.943	2.995	0.793	0.000	0.000	0.000	0.000	0.000	0.000	0.000	0.000	0.000	0.000	0.000	0.000	0.000	0.000	120	519	2108	2439	1.422	Error	Error	1535	573	0	0	1800	639	0	0	0	0
2	11	8	""	"YNL275W"	8530	15610	130	2791	2651	907	70	75	35	100	100	0	2949	2800	949	272	278	88	100	98	0	0	0	0	0	0	0	0	0	0	0	0	0	0	0	0	0	0	0	1.016	1.021	1.064	1.047	1.378	0.992	0.894	0.000	0.000	0.000	0.000	0.000	0.000	0.000	0.000	0.000	0.000	0.000	0.000	0.000	0.000	120	587	5398	5109	0.024	Error	Error	2721	2677	0	0	2581	2528	0	0	0	0
2	12	8	""	"YNL213C"	8720	15610	130	1629	1567	588	76	93	237	96	92	0	1415	1371	494	271	295	323	91	85	0	0	0	0	0	0	0	0	0	0	0	0	0	0	0	0	0	0	0	1.358	1.355	1.337	1.354	1.483	1.311	0.842	0.000	0.000	0.000	0.000	0.000	0.000	0.000	0.000	0.000	0.000	0.000	0.000	0.000	0.000	120	527	2697	2591	0.441	Error	Error	1553	1144	0	0	1491	1100	0	0	0	0
2	13	8	""	"YNL245C"	8910	15610	130	1229	1164	444	77	84	113	98	95	0	1056	1025	355	278	293	197	91	83	0	0	0	0	0	0	0	0	0	0	0	0	0	0	0	0	0	0	0	1.481	1.455	1.517	1.486	1.384	1.297	0.797	0.000	0.000	0.000	0.000	0.000	0.000	0.000	0.000	0.000	0.000	0.000	0.000	0.000	0.000	120	513	1930	1834	0.566	Error	Error	1152	778	0	0	1087	747	0	0	0	0
2	14	8	"met2"	"YNL277W"	9100	15610	130	1866	1844	917	75	93	139	98	95	0	1393	1325	549	295	315	213	89	83	0	0	0	0	0	0	0	0	0	0	0	0	0	0	0	0	0	0	0	1.631	1.717	1.712	1.766	1.698	1.687	0.763	0.000	0.000	0.000	0.000	0.000	0.000	0.000	0.000	0.000	0.000	0.000	0.000	0.000	0.000	120	573	2889	2799	0.706	Error	Error	1791	1098	0	0	1769	1030	0	0	0	0
2	15	8	"ALG6"	"YOR002W"	9300	15610	130	2403	2246	728	73	109	194	100	100	0	12460	11671	3320	292	331	355	100	100	0	0	0	0	0	0	0	0	0	0	0	0	0	0	0	0	0	0	0	0.191	0.191	0.194	0.186	1.265	0.186	0.905	0.000	0.000	0.000	0.000	0.000	0.000	0.000	0.000	0.000	0.000	0.000	0.000	0.000	0.000	120	520	14498	13552	-2.385	Error	Error	2330	12168	0	0	2173	11379	0	0	0	0
2	16	8	"DHS1"	"YOR033C"	9490	15610	130	2553	2484	871	73	95	150	100	100	0	5724	5635	1652	282	293	94	100	100	0	0	0	0	0	0	0	0	0	0	0	0	0	0	0	0	0	0	0	0.456	0.450	0.460	0.438	1.299	0.445	0.916	0.000	0.000	0.000	0.000	0.000	0.000	0.000	0.000	0.000	0.000	0.000	0.000	0.000	0.000	120	500	7922	7764	-1.134	Error	Error	2480	5442	0	0	2411	5353	0	0	0	0
2	17	8	"CYT1"	"YOR065W"	9670	15610	130	1628	1513	639	75	79	39	100	100	0	857	841	305	276	285	85	92	88	0	0	0	0	0	0	0	0	0	0	0	0	0	0	0	0	0	0	0	2.673	2.545	2.584	2.686	1.791	2.630	0.755	0.000	0.000	0.000	0.000	0.000	0.000	0.000	0.000	0.000	0.000	0.000	0.000	0.000	0.000	120	517	2134	2003	1.418	Error	Error	1553	581	0	0	1438	565	0	0	0	0
2	18	8	""	"YOR004W"	9860	15610	130	1507	1397	540	76	80	38	100	100	0	12776	11672	4198	277	287	87	100	100	0	0	0	0	0	0	0	0	0	0	0	0	0	0	0	0	0	0	0	0.114	0.116	0.118	0.113	1.333	0.110	0.901	0.000	0.000	0.000	0.000	0.000	0.000	0.000	0.000	0.000	0.000	0.000	0.000	0.000	0.000	120	517	13930	12716	-3.127	Error	Error	1431	12499	0	0	1321	11395	0	0	0	0
2	19	8	"SHE4"	"YOR035C"	10040	15610	130	2016	1997	949	75	79	29	100	100	0	993	979	361	273	281	74	95	92	0	0	0	0	0	0	0	0	0	0	0	0	0	0	0	0	0	0	0	2.696	2.722	2.777	2.743	1.517	2.859	0.804	0.000	0.000	0.000	0.000	0.000	0.000	0.000	0.000	0.000	0.000	0.000	0.000	0.000	0.000	120	518	2661	2628	1.431	Error	Error	1941	720	0	0	1922	706	0	0	0	0
2	20	8	"alg8"	"YOR067C"	10230	15610	130	2573	2464	1053	75	82	50	100	100	0	4842	4489	1792	271	282	82	100	100	0	0	0	0	0	0	0	0	0	0	0	0	0	0	0	0	0	0	0	0.546	0.566	0.556	0.557	1.335	0.551	0.903	0.000	0.000	0.000	0.000	0.000	0.000	0.000	0.000	0.000	0.000	0.000	0.000	0.000	0.000	120	509	7069	6607	-0.872	Error	Error	2498	4571	0	0	2389	4218	0	0	0	0
2	21	8	""	"YOR006C"	10420	15610	140	2598	2326	929	75	83	59	98	98	0	3540	3215	1201	278	288	89	98	98	0	0	0	0	0	0	0	0	0	0	0	0	0	0	0	0	0	0	0	0.773	0.766	0.772	0.771	1.395	0.757	0.894	0.000	0.000	0.000	0.000	0.000	0.000	0.000	0.000	0.000	0.000	0.000	0.000	0.000	0.000	156	501	5785	5188	-0.371	Error	Error	2523	3262	0	0	2251	2937	0	0	0	0
2	22	8	"cyc2"	"YOR037W"	10610	15610	140	2759	2505	1084	73	84	99	98	97	0	2406	2285	915	283	293	106	96	96	0	0	0	0	0	0	0	0	0	0	0	0	0	0	0	0	0	0	0	1.265	1.215	1.243	1.210	1.521	1.217	0.889	0.000	0.000	0.000	0.000	0.000	0.000	0.000	0.000	0.000	0.000	0.000	0.000	0.000	0.000	156	670	4809	4434	0.339	Error	Error	2686	2123	0	0	2432	2002	0	0	0	0
2	1	9	"VPS5"	"YOR069W"	6620	15790	130	3190	2992	1607	71	77	64	100	98	0	10862	9619	4921	282	299	188	98	96	0	0	0	0	0	0	0	0	0	0	0	0	0	0	0	0	0	0	0	0.295	0.313	0.306	0.320	1.578	0.299	0.907	0.000	0.000	0.000	0.000	0.000	0.000	0.000	0.000	0.000	0.000	0.000	0.000	0.000	0.000	120	629	13699	12258	-1.762	Error	Error	3119	10580	0	0	2921	9337	0	0	0	0
2	2	9	"SLG1"	"YOR008C"	6800	15790	130	4581	4279	1893	75	93	131	100	99	0	3660	3509	1545	281	321	295	94	90	0	0	0	0	0	0	0	0	0	0	0	0	0	0	0	0	0	0	0	1.334	1.302	1.309	1.352	1.384	1.282	0.919	0.000	0.000	0.000	0.000	0.000	0.000	0.000	0.000	0.000	0.000	0.000	0.000	0.000	0.000	120	509	7885	7432	0.415	Error	Error	4506	3379	0	0	4204	3228	0	0	0	0
2	3	9	"CKB2"	"YOR039W"	6990	15790	130	3840	3402	1223	78	94	121	100	99	0	1660	1543	547	271	308	229	91	89	0	0	0	0	0	0	0	0	0	0	0	0	0	0	0	0	0	0	0	2.708	2.613	2.701	2.717	1.457	2.626	0.816	0.000	0.000	0.000	0.000	0.000	0.000	0.000	0.000	0.000	0.000	0.000	0.000	0.000	0.000	120	566	5151	4596	1.437	Error	Error	3762	1389	0	0	3324	1272	0	0	0	0
2	4	9	""	"YOR071C"	7180	15790	130	3374	3509	2037	76	86	94	97	96	0	2940	2876	1576	285	322	482	86	82	0	0	0	0	0	0	0	0	0	0	0	0	0	0	0	0	0	0	0	1.242	1.325	1.295	1.395	1.589	1.298	0.791	0.000	0.000	0.000	0.000	0.000	0.000	0.000	0.000	0.000	0.000	0.000	0.000	0.000	0.000	120	531	5953	6024	0.313	Error	Error	3298	2655	0	0	3433	2591	0	0	0	0
2	5	9	"ATF1"	"YOR377W"	7360	15790	130	4185	3684	1372	72	85	93	100	100	0	4288	4041	1577	286	331	511	95	91	0	0	0	0	0	0	0	0	0	0	0	0	0	0	0	0	0	0	0	1.028	0.962	0.977	0.987	1.421	0.882	0.847	0.000	0.000	0.000	0.000	0.000	0.000	0.000	0.000	0.000	0.000	0.000	0.000	0.000	0.000	120	525	8115	7367	0.039	Error	Error	4113	4002	0	0	3612	3755	0	0	0	0
2	6	9	"HST2"	"YPL015C"	7550	15790	130	2919	2792	947	74	84	64	100	100	0	3650	3595	1212	282	309	234	100	98	0	0	0	0	0	0	0	0	0	0	0	0	0	0	0	0	0	0	0	0.845	0.820	0.831	0.827	1.288	0.809	0.895	0.000	0.000	0.000	0.000	0.000	0.000	0.000	0.000	0.000	0.000	0.000	0.000	0.000	0.000	120	515	6213	6031	-0.243	Error	Error	2845	3368	0	0	2718	3313	0	0	0	0
2	7	9	""	"YPL047W"	7740	15790	130	1024	934	317	77	84	53	98	95	0	718	680	213	282	299	154	85	69	0	0	0	0	0	0	0	0	0	0	0	0	0	0	0	0	0	0	0	2.172	2.153	2.035	2.297	1.668	1.996	0.631	0.000	0.000	0.000	0.000	0.000	0.000	0.000	0.000	0.000	0.000	0.000	0.000	0.000	0.000	120	587	1383	1255	1.119	Error	Error	947	436	0	0	857	398	0	0	0	0
2	8	9	""	"YOR379C"	7950	15810	110	190	198	62	74	78	34	92	82	0	451	453	137	275	280	79	80	56	0	0	0	0	0	0	0	0	0	0	0	0	0	0	0	0	0	0	0	0.659	0.697	0.631	0.610	2.250	0.349	0.281	0.000	0.000	0.000	0.000	0.000	0.000	0.000	0.000	0.000	0.000	0.000	0.000	0.000	0.000	80	459	292	302	-0.601	Error	Error	116	176	0	0	124	178	0	0	0	0
2	9	9	""	"YPL017C"	8120	15790	130	1849	1898	794	71	74	27	100	100	0	1136	1138	397	272	275	75	97	97	0	0	0	0	0	0	0	0	0	0	0	0	0	0	0	0	0	0	0	2.058	2.110	2.211	2.142	1.471	2.164	0.852	0.000	0.000	0.000	0.000	0.000	0.000	0.000	0.000	0.000	0.000	0.000	0.000	0.000	0.000	120	554	2642	2693	1.041	Error	Error	1778	864	0	0	1827	866	0	0	0	0
2	10	9	"DIG1"	"YPL049C"	8310	15790	130	2173	2338	1110	73	77	33	100	100	0	1067	1093	423	272	279	75	96	95	0	0	0	0	0	0	0	0	0	0	0	0	0	0	0	0	0	0	0	2.642	2.759	2.859	2.906	1.598	2.909	0.842	0.000	0.000	0.000	0.000	0.000	0.000	0.000	0.000	0.000	0.000	0.000	0.000	0.000	0.000	120	573	2895	3086	1.401	Error	Error	2100	795	0	0	2265	821	0	0	0	0
2	11	9	"FRE3"	"YOR381W"	8520	15810	110	230	247	118	70	77	32	92	87	0	458	465	154	276	279	74	80	58	0	0	0	0	0	0	0	0	0	0	0	0	0	0	0	0	0	0	0	0.879	0.937	0.987	0.974	2.055	0.666	0.497	0.000	0.000	0.000	0.000	0.000	0.000	0.000	0.000	0.000	0.000	0.000	0.000	0.000	0.000	80	440	342	366	-0.186	Error	Error	160	182	0	0	177	189	0	0	0	0
2	12	9	""	"YPL019C"	8680	15790	130	2122	2339	1071	73	77	31	100	100	0	1181	1241	480	277	284	89	97	95	0	0	0	0	0	0	0	0	0	0	0	0	0	0	0	0	0	0	0	2.267	2.351	2.270	2.417	1.495	2.411	0.849	0.000	0.000	0.000	0.000	0.000	0.000	0.000	0.000	0.000	0.000	0.000	0.000	0.000	0.000	120	508	2953	3230	1.181	Error	Error	2049	904	0	0	2266	964	0	0	0	0
2	13	9	"ARL3"	"YPL051W"	8880	15790	130	1601	1521	678	75	83	107	98	95	0	2786	2690	1142	283	301	213	95	94	0	0	0	0	0	0	0	0	0	0	0	0	0	0	0	0	0	0	0	0.610	0.601	0.613	0.605	1.370	0.581	0.894	0.000	0.000	0.000	0.000	0.000	0.000	0.000	0.000	0.000	0.000	0.000	0.000	0.000	0.000	120	523	4029	3853	-0.714	Error	Error	1526	2503	0	0	1446	2407	0	0	0	0
2	14	9	""	"YOR383C"	9070	15790	130	1570	1609	654	75	85	113	99	96	0	2202	2073	741	296	326	265	95	91	0	0	0	0	0	0	0	0	0	0	0	0	0	0	0	0	0	0	0	0.784	0.863	0.820	0.863	1.411	0.838	0.862	0.000	0.000	0.000	0.000	0.000	0.000	0.000	0.000	0.000	0.000	0.000	0.000	0.000	0.000	120	544	3401	3311	-0.350	Error	Error	1495	1906	0	0	1534	1777	0	0	0	0
2	15	9	"ECM23"	"YPL021W"	9270	15790	130	936	861	310	73	82	51	99	97	0	2376	2238	761	296	313	159	97	95	0	0	0	0	0	0	0	0	0	0	0	0	0	0	0	0	0	0	0	0.415	0.406	0.397	0.405	1.356	0.387	0.870	0.000	0.000	0.000	0.000	0.000	0.000	0.000	0.000	0.000	0.000	0.000	0.000	0.000	0.000	120	539	2943	2730	-1.269	Error	Error	863	2080	0	0	788	1942	0	0	0	0
2	16	9	"KTR6"	"YPL053C"	9450	15790	130	1265	1262	530	72	89	117	100	97	0	947	962	296	284	296	105	95	93	0	0	0	0	0	0	0	0	0	0	0	0	0	0	0	0	0	0	0	1.799	1.755	1.746	1.713	1.483	1.888	0.779	0.000	0.000	0.000	0.000	0.000	0.000	0.000	0.000	0.000	0.000	0.000	0.000	0.000	0.000	120	498	1856	1868	0.848	Error	Error	1193	663	0	0	1190	678	0	0	0	0
2	17	9	""	"YPR078C"	9640	15800	130	2972	2790	1024	74	83	66	100	100	0	965	950	341	283	297	106	90	88	0	0	0	0	0	0	0	0	0	0	0	0	0	0	0	0	0	0	0	4.249	4.072	3.970	4.304	1.645	4.131	0.771	0.000	0.000	0.000	0.000	0.000	0.000	0.000	0.000	0.000	0.000	0.000	0.000	0.000	0.000	120	540	3580	3383	2.087	Error	Error	2898	682	0	0	2716	667	0	0	0	0
2	18	9	"RPC40"	"YPR110C"	9840	15800	130	2433	2254	715	74	78	32	100	100	0	2794	2670	847	284	291	80	100	100	0	0	0	0	0	0	0	0	0	0	0	0	0	0	0	0	0	0	0	0.940	0.914	0.945	0.916	1.318	0.891	0.893	0.000	0.000	0.000	0.000	0.000	0.000	0.000	0.000	0.000	0.000	0.000	0.000	0.000	0.000	120	557	4869	4566	-0.090	Error	Error	2359	2510	0	0	2180	2386	0	0	0	0
2	19	9	""	"YPR139C"	10030	15790	130	1871	1714	575	73	79	38	100	100	0	1181	1116	353	278	284	77	95	93	0	0	0	0	0	0	0	0	0	0	0	0	0	0	0	0	0	0	0	1.991	1.958	1.903	2.016	1.455	1.935	0.864	0.000	0.000	0.000	0.000	0.000	0.000	0.000	0.000	0.000	0.000	0.000	0.000	0.000	0.000	120	533	2701	2479	0.994	Error	Error	1798	903	0	0	1641	838	0	0	0	0
2	20	9	"tef1"	"YPR080W"	10220	15790	130	3085	2798	887	73	82	64	100	100	0	1498	1479	440	272	287	107	97	96	0	0	0	0	0	0	0	0	0	0	0	0	0	0	0	0	0	0	0	2.457	2.258	2.280	2.267	1.382	2.408	0.845	0.000	0.000	0.000	0.000	0.000	0.000	0.000	0.000	0.000	0.000	0.000	0.000	0.000	0.000	120	533	4238	3932	1.297	Error	Error	3012	1226	0	0	2725	1207	0	0	0	0
2	21	9	""	"YPR112C"	10420	15800	140	2477	2740	1399	73	79	58	100	99	0	3033	3210	1422	277	285	104	98	96	0	0	0	0	0	0	0	0	0	0	0	0	0	0	0	0	0	0	0	0.872	0.909	0.919	0.915	1.550	0.932	0.885	0.000	0.000	0.000	0.000	0.000	0.000	0.000	0.000	0.000	0.000	0.000	0.000	0.000	0.000	156	556	5160	5600	-0.197	Error	Error	2404	2756	0	0	2667	2933	0	0	0	0
2	22	9	"kar3"	"YPR141C"	10620	15800	120	179	180	67	72	74	27	89	80	0	474	458	138	280	281	75	77	61	0	0	0	0	0	0	0	0	0	0	0	0	0	0	0	0	0	0	0	0.552	0.607	0.521	0.547	2.269	0.357	0.400	0.000	0.000	0.000	0.000	0.000	0.000	0.000	0.000	0.000	0.000	0.000	0.000	0.000	0.000	120	550	301	286	-0.858	Error	Error	107	194	0	0	108	178	0	0	0	0
2	1	10	"DIB1"	"YPR082C"	6610	15980	130	3054	2752	1067	71	76	40	100	100	0	1757	1609	591	284	300	184	92	90	0	0	0	0	0	0	0	0	0	0	0	0	0	0	0	0	0	0	0	2.025	2.023	2.048	2.143	1.560	1.994	0.900	0.000	0.000	0.000	0.000	0.000	0.000	0.000	0.000	0.000	0.000	0.000	0.000	0.000	0.000	120	666	4456	4006	1.018	Error	Error	2983	1473	0	0	2681	1325	0	0	0	0
2	2	10	""	"YPR114W"	6800	15980	130	4459	3989	1349	77	101	201	100	99	0	1578	1485	503	284	323	259	94	87	0	0	0	0	0	0	0	0	0	0	0	0	0	0	0	0	0	0	0	3.386	3.257	3.151	3.348	1.423	3.284	0.859	0.000	0.000	0.000	0.000	0.000	0.000	0.000	0.000	0.000	0.000	0.000	0.000	0.000	0.000	120	588	5676	5113	1.760	Error	Error	4382	1294	0	0	3912	1201	0	0	0	0
2	3	10	""	"YPR143W"	7010	15990	130	1827	1678	680	77	98	193	95	91	0	1491	1399	511	276	298	166	90	89	0	0	0	0	0	0	0	0	0	0	0	0	0	0	0	0	0	0	0	1.440	1.426	1.420	1.450	1.552	1.419	0.850	0.000	0.000	0.000	0.000	0.000	0.000	0.000	0.000	0.000	0.000	0.000	0.000	0.000	0.000	120	576	2965	2724	0.526	Error	Error	1750	1215	0	0	1601	1123	0	0	0	0
2	4	10	""	"YPR084W"	7190	15990	130	5170	4660	1761	75	80	41	100	100	0	8294	7487	2687	280	288	74	99	99	0	0	0	0	0	0	0	0	0	0	0	0	0	0	0	0	0	0	0	0.636	0.636	0.633	0.650	1.460	0.614	0.898	0.000	0.000	0.000	0.000	0.000	0.000	0.000	0.000	0.000	0.000	0.000	0.000	0.000	0.000	120	560	13109	11792	-0.653	Error	Error	5095	8014	0	0	4585	7207	0	0	0	0
2	5	10	""	"YPR116W"	7390	15990	130	2314	2044	805	72	78	44	100	98	0	1113	1079	411	277	288	123	92	87	0	0	0	0	0	0	0	0	0	0	0	0	0	0	0	0	0	0	0	2.682	2.459	2.516	2.568	1.592	2.460	0.807	0.000	0.000	0.000	0.000	0.000	0.000	0.000	0.000	0.000	0.000	0.000	0.000	0.000	0.000	120	561	3078	2774	1.423	Error	Error	2242	836	0	0	1972	802	0	0	0	0
2	6	10	"ASN1"	"YPR145W"	7570	15980	130	3362	3417	2483	72	78	35	99	97	0	3855	3789	2466	273	287	161	90	89	0	0	0	0	0	0	0	0	0	0	0	0	0	0	0	0	0	0	0	0.918	0.951	0.919	1.030	1.983	0.966	0.866	0.000	0.000	0.000	0.000	0.000	0.000	0.000	0.000	0.000	0.000	0.000	0.000	0.000	0.000	120	557	6872	6861	-0.123	Error	Error	3290	3582	0	0	3345	3516	0	0	0	0
2	7	10	""	"iYAL056W"	7770	15990	130	1369	1240	514	74	77	31	98	97	0	2191	2065	864	275	287	138	93	92	0	0	0	0	0	0	0	0	0	0	0	0	0	0	0	0	0	0	0	0.676	0.651	0.656	0.639	1.480	0.619	0.889	0.000	0.000	0.000	0.000	0.000	0.000	0.000	0.000	0.000	0.000	0.000	0.000	0.000	0.000	120	568	3211	2956	-0.565	Error	Error	1295	1916	0	0	1166	1790	0	0	0	0
2	8	10	""	"iYAL051W"	7950	15990	120	381	365	144	74	75	26	95	92	0	2305	2144	945	279	283	83	95	91	0	0	0	0	0	0	0	0	0	0	0	0	0	0	0	0	0	0	0	0.152	0.156	0.146	0.165	1.842	0.137	0.772	0.000	0.000	0.000	0.000	0.000	0.000	0.000	0.000	0.000	0.000	0.000	0.000	0.000	0.000	120	496	2333	2156	-2.722	Error	Error	307	2026	0	0	291	1865	0	0	0	0
2	9	10	""	"iYAL046C"	8130	15990	110	468	455	133	73	85	72	98	91	0	578	574	153	280	292	101	90	72	0	0	0	0	0	0	0	0	0	0	0	0	0	0	0	0	0	0	0	1.326	1.299	1.260	1.309	1.817	1.144	0.581	0.000	0.000	0.000	0.000	0.000	0.000	0.000	0.000	0.000	0.000	0.000	0.000	0.000	0.000	80	459	693	676	0.407	Error	Error	395	298	0	0	382	294	0	0	0	0
2	10	10	""	"iYAL031C"	8330	15990	120	978	926	381	76	86	67	97	95	0	998	914	343	277	291	93	92	85	0	0	0	0	0	0	0	0	0	0	0	0	0	0	0	0	0	0	0	1.251	1.334	1.300	1.432	1.878	1.235	0.814	0.000	0.000	0.000	0.000	0.000	0.000	0.000	0.000	0.000	0.000	0.000	0.000	0.000	0.000	120	542	1623	1487	0.323	Error	Error	902	721	0	0	850	637	0	0	0	0
2	11	10	""	"iYAL027W"	8520	15990	130	800	727	269	75	78	29	99	98	0	3496	3198	1305	290	294	78	100	99	0	0	0	0	0	0	0	0	0	0	0	0	0	0	0	0	0	0	0	0.226	0.224	0.225	0.235	1.548	0.197	0.853	0.000	0.000	0.000	0.000	0.000	0.000	0.000	0.000	0.000	0.000	0.000	0.000	0.000	0.000	120	572	3931	3560	-2.145	Error	Error	725	3206	0	0	652	2908	0	0	0	0
2	12	10	""	"iYAL023C"	8730	15990	140	1338	1260	538	71	75	30	99	99	0	760	735	256	292	300	91	90	87	0	0	0	0	0	0	0	0	0	0	0	0	0	0	0	0	0	0	0	2.707	2.684	2.652	2.819	1.786	2.713	0.731	0.000	0.000	0.000	0.000	0.000	0.000	0.000	0.000	0.000	0.000	0.000	0.000	0.000	0.000	156	585	1735	1632	1.437	Error	Error	1267	468	0	0	1189	443	0	0	0	0
2	13	10	""	"iYAL007C"	8900	15990	130	1851	1891	887	70	83	105	100	98	0	4607	4589	2014	289	353	515	96	92	0	0	0	0	0	0	0	0	0	0	0	0	0	0	0	0	0	0	0	0.412	0.423	0.420	0.431	1.439	0.402	0.906	0.000	0.000	0.000	0.000	0.000	0.000	0.000	0.000	0.000	0.000	0.000	0.000	0.000	0.000	120	505	6099	6121	-1.278	Error	Error	1781	4318	0	0	1821	4300	0	0	0	0
2	14	10	""	"iYAL003W"	9090	15990	130	2543	2488	1038	74	91	116	100	98	0	3455	3172	1362	294	374	517	93	86	0	0	0	0	0	0	0	0	0	0	0	0	0	0	0	0	0	0	0	0.781	0.839	0.815	0.919	1.630	0.743	0.852	0.000	0.000	0.000	0.000	0.000	0.000	0.000	0.000	0.000	0.000	0.000	0.000	0.000	0.000	120	613	5630	5292	-0.356	Error	Error	2469	3161	0	0	2414	2878	0	0	0	0
2	15	10	""	"iYAR002W"	9300	15990	130	1176	1090	446	73	82	71	97	94	0	8369	7624	3148	288	318	234	100	95	0	0	0	0	0	0	0	0	0	0	0	0	0	0	0	0	0	0	0	0.136	0.139	0.140	0.141	1.448	0.133	0.901	0.000	0.000	0.000	0.000	0.000	0.000	0.000	0.000	0.000	0.000	0.000	0.000	0.000	0.000	120	554	9184	8353	-2.873	Error	Error	1103	8081	0	0	1017	7336	0	0	0	0
2	16	10	""	"itL(CAA)A"	9470	15990	130	3228	3048	940	73	87	118	100	100	0	2581	2472	707	287	316	207	99	98	0	0	0	0	0	0	0	0	0	0	0	0	0	0	0	0	0	0	0	1.375	1.362	1.363	1.387	1.424	1.384	0.898	0.000	0.000	0.000	0.000	0.000	0.000	0.000	0.000	0.000	0.000	0.000	0.000	0.000	0.000	120	540	5449	5160	0.460	Error	Error	3155	2294	0	0	2975	2185	0	0	0	0
2	17	10	""	"iYAR028W"	9660	15990	130	2611	2579	1148	72	93	159	99	96	0	1966	1808	759	290	330	270	90	87	0	0	0	0	0	0	0	0	0	0	0	0	0	0	0	0	0	0	0	1.515	1.652	1.675	1.776	1.685	1.615	0.839	0.000	0.000	0.000	0.000	0.000	0.000	0.000	0.000	0.000	0.000	0.000	0.000	0.000	0.000	120	578	4215	4025	0.599	Error	Error	2539	1676	0	0	2507	1518	0	0	0	0
2	18	10	""	"iYAR035W"	9860	15990	130	1226	1163	486	71	86	124	97	95	0	944	938	331	288	313	203	90	82	0	0	0	0	0	0	0	0	0	0	0	0	0	0	0	0	0	0	0	1.761	1.680	1.699	1.709	1.655	1.507	0.732	0.000	0.000	0.000	0.000	0.000	0.000	0.000	0.000	0.000	0.000	0.000	0.000	0.000	0.000	120	580	1811	1742	0.816	Error	Error	1155	656	0	0	1092	650	0	0	0	0
2	19	10	""	"iYBR162C"	10050	15990	130	1350	1267	443	72	76	35	100	100	0	873	876	257	285	292	78	96	92	0	0	0	0	0	0	0	0	0	0	0	0	0	0	0	0	0	0	0	2.173	2.022	2.056	2.053	1.510	2.062	0.782	0.000	0.000	0.000	0.000	0.000	0.000	0.000	0.000	0.000	0.000	0.000	0.000	0.000	0.000	120	579	1866	1786	1.120	Error	Error	1278	588	0	0	1195	591	0	0	0	0
2	20	10	""	"iYBR165W"	10240	15990	120	307	301	118	72	77	58	91	80	0	990	942	342	280	287	97	92	87	0	0	0	0	0	0	0	0	0	0	0	0	0	0	0	0	0	0	0	0.331	0.346	0.356	0.348	2.017	0.299	0.652	0.000	0.000	0.000	0.000	0.000	0.000	0.000	0.000	0.000	0.000	0.000	0.000	0.000	0.000	120	527	945	891	-1.595	Error	Error	235	710	0	0	229	662	0	0	0	0
2	21	10	""	"iYBR169C"	10430	15990	130	860	797	288	73	75	29	99	99	0	736	718	244	277	279	73	93	86	0	0	0	0	0	0	0	0	0	0	0	0	0	0	0	0	0	0	0	1.715	1.642	1.642	1.678	1.552	1.556	0.716	0.000	0.000	0.000	0.000	0.000	0.000	0.000	0.000	0.000	0.000	0.000	0.000	0.000	0.000	120	520	1246	1165	0.778	Error	Error	787	459	0	0	724	441	0	0	0	0
2	22	10	""	"iYBR187W"	10620	15990	130	893	827	285	79	82	32	99	99	0	640	627	205	285	288	79	87	81	0	0	0	0	0	0	0	0	0	0	0	0	0	0	0	0	0	0	0	2.293	2.187	2.100	2.329	1.814	2.012	0.671	0.000	0.000	0.000	0.000	0.000	0.000	0.000	0.000	0.000	0.000	0.000	0.000	0.000	0.000	120	648	1169	1090	1.197	Error	Error	814	355	0	0	748	342	0	0	0	0
2	1	11	""	"iYBR192W"	6640	16180	120	1253	1189	425	70	74	34	100	100	0	4687	4389	1772	277	283	88	100	100	0	0	0	0	0	0	0	0	0	0	0	0	0	0	0	0	0	0	0	0.268	0.272	0.282	0.281	1.335	0.249	0.872	0.000	0.000	0.000	0.000	0.000	0.000	0.000	0.000	0.000	0.000	0.000	0.000	0.000	0.000	120	594	5593	5231	-1.898	Error	Error	1183	4410	0	0	1119	4112	0	0	0	0
2	2	11	""	"iYBR196C"	6830	16180	130	2532	2372	1056	70	83	164	99	95	0	1159	1106	402	280	294	132	92	86	0	0	0	0	0	0	0	0	0	0	0	0	0	0	0	0	0	0	0	2.801	2.787	2.774	2.796	1.499	2.933	0.853	0.000	0.000	0.000	0.000	0.000	0.000	0.000	0.000	0.000	0.000	0.000	0.000	0.000	0.000	120	528	3341	3128	1.486	Error	Error	2462	879	0	0	2302	826	0	0	0	0
2	3	11	""	"iYBRCdelta19"	7010	16180	130	1770	1618	687	70	73	26	100	100	0	1217	1149	431	276	280	74	95	93	0	0	0	0	0	0	0	0	0	0	0	0	0	0	0	0	0	0	0	1.807	1.773	1.786	1.788	1.521	1.751	0.819	0.000	0.000	0.000	0.000	0.000	0.000	0.000	0.000	0.000	0.000	0.000	0.000	0.000	0.000	120	524	2641	2421	0.853	Error	Error	1700	941	0	0	1548	873	0	0	0	0
2	4	11	""	"iYBR212W"	7200	16180	130	1657	1508	606	69	72	26	100	99	0	1057	986	361	270	278	77	95	92	0	0	0	0	0	0	0	0	0	0	0	0	0	0	0	0	0	0	0	2.018	2.010	2.105	2.094	1.632	2.001	0.793	0.000	0.000	0.000	0.000	0.000	0.000	0.000	0.000	0.000	0.000	0.000	0.000	0.000	0.000	120	549	2375	2155	1.013	Error	Error	1588	787	0	0	1439	716	0	0	0	0
2	5	11	""	"iYBR216C"	7400	16180	120	604	612	298	69	71	26	99	96	0	1051	979	423	270	277	76	91	88	0	0	0	0	0	0	0	0	0	0	0	0	0	0	0	0	0	0	0	0.685	0.766	0.736	0.746	1.904	0.725	0.793	0.000	0.000	0.000	0.000	0.000	0.000	0.000	0.000	0.000	0.000	0.000	0.000	0.000	0.000	120	471	1316	1252	-0.546	Error	Error	535	781	0	0	543	709	0	0	0	0
2	6	11	""	"iYBR237W"	7580	16180	130	839	782	334	73	77	31	98	97	0	3359	3010	1335	268	283	153	98	96	0	0	0	0	0	0	0	0	0	0	0	0	0	0	0	0	0	0	0	0.248	0.259	0.253	0.268	1.585	0.231	0.857	0.000	0.000	0.000	0.000	0.000	0.000	0.000	0.000	0.000	0.000	0.000	0.000	0.000	0.000	120	544	3857	3451	-2.013	Error	Error	766	3091	0	0	709	2742	0	0	0	0
2	7	11	""	"iYBR241C"	7770	16180	130	1344	1244	436	76	83	64	100	100	0	1454	1376	456	273	297	152	97	95	0	0	0	0	0	0	0	0	0	0	0	0	0	0	0	0	0	0	0	1.074	1.059	1.035	1.090	1.699	1.035	0.834	0.000	0.000	0.000	0.000	0.000	0.000	0.000	0.000	0.000	0.000	0.000	0.000	0.000	0.000	120	520	2449	2271	0.103	Error	Error	1268	1181	0	0	1168	1103	0	0	0	0
2	8	11	""	"iYBR246W"	7960	16180	130	930	852	371	75	81	64	98	95	0	2223	2101	834	283	298	139	97	95	0	0	0	0	0	0	0	0	0	0	0	0	0	0	0	0	0	0	0	0.441	0.427	0.419	0.420	1.453	0.409	0.864	0.000	0.000	0.000	0.000	0.000	0.000	0.000	0.000	0.000	0.000	0.000	0.000	0.000	0.000	120	496	2795	2595	-1.182	Error	Error	855	1940	0	0	777	1818	0	0	0	0
2	9	11	""	"iYDL140C"	8160	16180	140	821	786	273	74	84	66	99	96	0	557	541	162	284	293	93	82	74	0	0	0	0	0	0	0	0	0	0	0	0	0	0	0	0	0	0	0	2.736	2.770	2.601	2.873	2.031	2.678	0.592	0.000	0.000	0.000	0.000	0.000	0.000	0.000	0.000	0.000	0.000	0.000	0.000	0.000	0.000	156	565	1020	969	1.452	Error	Error	747	273	0	0	712	257	0	0	0	0
2	10	11	""	"iYDL136W"	8350	16180	120	906	835	306	76	78	28	100	100	0	3054	2806	1065	286	293	78	99	97	0	0	0	0	0	0	0	0	0	0	0	0	0	0	0	0	0	0	0	0.300	0.301	0.310	0.324	1.623	0.275	0.858	0.000	0.000	0.000	0.000	0.000	0.000	0.000	0.000	0.000	0.000	0.000	0.000	0.000	0.000	120	417	3598	3279	-1.738	Error	Error	830	2768	0	0	759	2520	0	0	0	0
2	11	11	""	"iYDL133W"	8530	16190	120	595	592	298	76	77	28	98	95	0	517	515	183	290	296	80	78	60	0	0	0	0	0	0	0	0	0	0	0	0	0	0	0	0	0	0	0	2.286	2.293	2.138	2.255	2.014	2.132	0.589	0.000	0.000	0.000	0.000	0.000	0.000	0.000	0.000	0.000	0.000	0.000	0.000	0.000	0.000	120	449	746	741	1.193	Error	Error	519	227	0	0	516	225	0	0	0	0
2	12	11	""	"iYDL117W"	8720	16180	130	797	733	236	71	72	27	99	98	0	636	628	188	288	294	80	88	85	0	0	0	0	0	0	0	0	0	0	0	0	0	0	0	0	0	0	0	2.086	1.947	2.029	2.019	1.677	1.794	0.659	0.000	0.000	0.000	0.000	0.000	0.000	0.000	0.000	0.000	0.000	0.000	0.000	0.000	0.000	120	476	1074	1002	1.061	Error	Error	726	348	0	0	662	340	0	0	0	0
2	13	11	""	"iYDL113C"	8910	16180	120	852	777	304	72	78	58	100	95	0	569	572	208	286	305	198	69	27	0	0	0	0	0	0	0	0	0	0	0	0	0	0	0	0	0	0	0	2.756	2.465	2.458	2.592	1.905	2.305	0.601	0.000	0.000	0.000	0.000	0.000	0.000	0.000	0.000	0.000	0.000	0.000	0.000	0.000	0.000	120	497	1063	991	1.463	Error	Error	780	283	0	0	705	286	0	0	0	0
2	14	11	""	"iYDL109C"	9110	16190	130	865	842	444	73	79	43	96	95	0	626	626	256	290	300	114	82	67	0	0	0	0	0	0	0	0	0	0	0	0	0	0	0	0	0	0	0	2.357	2.289	2.353	2.327	1.847	2.194	0.686	0.000	0.000	0.000	0.000	0.000	0.000	0.000	0.000	0.000	0.000	0.000	0.000	0.000	0.000	120	544	1128	1105	1.237	Error	Error	792	336	0	0	769	336	0	0	0	0
2	15	11	""	"iYDL090C"	9290	16180	130	1315	1226	478	73	76	30	99	99	0	862	826	300	288	294	78	90	88	0	0	0	0	0	0	0	0	0	0	0	0	0	0	0	0	0	0	0	2.164	2.143	2.130	2.235	1.614	2.084	0.765	0.000	0.000	0.000	0.000	0.000	0.000	0.000	0.000	0.000	0.000	0.000	0.000	0.000	0.000	120	530	1816	1691	1.114	Error	Error	1242	574	0	0	1153	538	0	0	0	0
2	16	11	""	"iYDL086W"	9490	16190	130	1389	1295	447	75	83	94	99	97	0	932	894	292	288	304	154	93	85	0	0	0	0	0	0	0	0	0	0	0	0	0	0	0	0	0	0	0	2.040	2.013	1.973	2.066	1.644	2.041	0.777	0.000	0.000	0.000	0.000	0.000	0.000	0.000	0.000	0.000	0.000	0.000	0.000	0.000	0.000	120	522	1958	1826	1.029	Error	Error	1314	644	0	0	1220	606	0	0	0	0
2	17	11	""	"iYDL082W"	9680	16190	130	386	417	217	72	79	90	90	75	0	1474	1577	782	292	299	105	92	92	0	0	0	0	0	0	0	0	0	0	0	0	0	0	0	0	0	0	0	0.266	0.268	0.268	0.275	1.906	0.247	0.811	0.000	0.000	0.000	0.000	0.000	0.000	0.000	0.000	0.000	0.000	0.000	0.000	0.000	0.000	120	487	1496	1630	-1.912	Error	Error	314	1182	0	0	345	1285	0	0	0	0
2	18	11	""	"iYDL065C"	9870	16190	130	575	555	195	71	75	31	99	98	0	855	805	250	286	293	81	94	89	0	0	0	0	0	0	0	0	0	0	0	0	0	0	0	0	0	0	0	0.886	0.933	0.976	0.987	1.723	0.844	0.738	0.000	0.000	0.000	0.000	0.000	0.000	0.000	0.000	0.000	0.000	0.000	0.000	0.000	0.000	120	501	1073	1003	-0.175	Error	Error	504	569	0	0	484	519	0	0	0	0
2	19	11	""	"iYDL060W"	10050	16190	130	246	244	82	72	75	28	95	91	0	513	509	144	280	287	82	85	71	0	0	0	0	0	0	0	0	0	0	0	0	0	0	0	0	0	0	0	0.747	0.751	0.721	0.756	2.194	0.522	0.438	0.000	0.000	0.000	0.000	0.000	0.000	0.000	0.000	0.000	0.000	0.000	0.000	0.000	0.000	120	550	407	401	-0.421	Error	Error	174	233	0	0	172	229	0	0	0	0
2	20	11	""	"iYDL056W"	10250	16190	130	529	494	171	73	76	29	97	95	0	2526	2330	896	277	281	78	97	97	0	0	0	0	0	0	0	0	0	0	0	0	0	0	0	0	0	0	0	0.203	0.205	0.211	0.209	1.712	0.183	0.822	0.000	0.000	0.000	0.000	0.000	0.000	0.000	0.000	0.000	0.000	0.000	0.000	0.000	0.000	120	554	2705	2474	-2.302	Error	Error	456	2249	0	0	421	2053	0	0	0	0
2	21	11	""	"iYDRWdelta12"	10420	16180	130	952	879	283	77	81	29	100	100	0	943	953	309	277	282	73	95	93	0	0	0	0	0	0	0	0	0	0	0	0	0	0	0	0	0	0	0	1.314	1.186	1.127	1.199	1.439	1.120	0.784	0.000	0.000	0.000	0.000	0.000	0.000	0.000	0.000	0.000	0.000	0.000	0.000	0.000	0.000	120	475	1541	1478	0.394	Error	Error	875	666	0	0	802	676	0	0	0	0
2	22	11	""	"iYDR244W"	10600	16180	130	714	646	272	83	85	32	98	96	0	565	554	207	296	301	80	80	70	0	0	0	0	0	0	0	0	0	0	0	0	0	0	0	0	0	0	0	2.346	2.182	2.199	2.266	2.270	1.929	0.567	0.000	0.000	0.000	0.000	0.000	0.000	0.000	0.000	0.000	0.000	0.000	0.000	0.000	0.000	120	592	900	821	1.230	Error	Error	631	269	0	0	563	258	0	0	0	0
2	1	12	""	"iYDR248C"	6620	16370	130	2204	2128	619	73	76	30	100	100	0	3917	3767	1138	279	287	86	100	100	0	0	0	0	0	0	0	0	0	0	0	0	0	0	0	0	0	0	0	0.586	0.589	0.593	0.596	1.251	0.553	0.890	0.000	0.000	0.000	0.000	0.000	0.000	0.000	0.000	0.000	0.000	0.000	0.000	0.000	0.000	120	624	5769	5543	-0.772	Error	Error	2131	3638	0	0	2055	3488	0	0	0	0
2	2	12	""	"itG(GCC)D2"	6810	16370	120	800	743	224	68	72	29	99	99	0	1068	1051	288	275	284	79	99	95	0	0	0	0	0	0	0	0	0	0	0	0	0	0	0	0	0	0	0	0.923	0.870	0.893	0.889	1.522	0.813	0.813	0.000	0.000	0.000	0.000	0.000	0.000	0.000	0.000	0.000	0.000	0.000	0.000	0.000	0.000	120	441	1525	1451	-0.115	Error	Error	732	793	0	0	675	776	0	0	0	0
2	3	12	""	"iYDR265W"	6980	16370	120	813	753	225	70	72	27	100	100	0	1342	1289	390	279	285	75	99	95	0	0	0	0	0	0	0	0	0	0	0	0	0	0	0	0	0	0	0	0.699	0.676	0.681	0.713	1.559	0.618	0.854	0.000	0.000	0.000	0.000	0.000	0.000	0.000	0.000	0.000	0.000	0.000	0.000	0.000	0.000	120	435	1806	1693	-0.517	Error	Error	743	1063	0	0	683	1010	0	0	0	0
2	4	12	""	"iYDR271C"	7180	16370	130	488	450	160	72	73	26	99	97	0	613	611	182	278	281	78	91	86	0	0	0	0	0	0	0	0	0	0	0	0	0	0	0	0	0	0	0	1.242	1.135	1.139	1.144	1.921	0.990	0.656	0.000	0.000	0.000	0.000	0.000	0.000	0.000	0.000	0.000	0.000	0.000	0.000	0.000	0.000	120	479	751	711	0.312	Error	Error	416	335	0	0	378	333	0	0	0	0
2	5	12	""	"iYDR286C"	7370	16370	140	2671	2502	895	70	77	55	100	99	0	1534	1494	512	273	283	95	96	96	0	0	0	0	0	0	0	0	0	0	0	0	0	0	0	0	0	0	0	2.063	1.992	1.989	2.076	1.561	2.013	0.867	0.000	0.000	0.000	0.000	0.000	0.000	0.000	0.000	0.000	0.000	0.000	0.000	0.000	0.000	156	509	3862	3653	1.044	Error	Error	2601	1261	0	0	2432	1221	0	0	0	0
2	6	12	""	"iYDR292C"	7550	16370	130	1924	1837	579	73	78	42	100	100	0	1795	1718	553	273	289	127	98	97	0	0	0	0	0	0	0	0	0	0	0	0	0	0	0	0	0	0	0	1.216	1.221	1.193	1.296	1.563	1.172	0.862	0.000	0.000	0.000	0.000	0.000	0.000	0.000	0.000	0.000	0.000	0.000	0.000	0.000	0.000	120	491	3373	3209	0.282	Error	Error	1851	1522	0	0	1764	1445	0	0	0	0
2	7	12	""	"iYDR296W"	7750	16370	130	1957	1782	651	75	81	47	100	100	0	944	895	317	273	292	133	90	85	0	0	0	0	0	0	0	0	0	0	0	0	0	0	0	0	0	0	0	2.805	2.744	2.682	2.888	1.600	2.884	0.728	0.000	0.000	0.000	0.000	0.000	0.000	0.000	0.000	0.000	0.000	0.000	0.000	0.000	0.000	120	512	2553	2329	1.488	Error	Error	1882	671	0	0	1707	622	0	0	0	0
2	8	12	""	"iYDR311W"	7940	16360	150	93	125	101	75	83	62	25	14	0	315	359	187	278	297	133	21	8	0	0	0	0	0	0	0	0	0	0	0	0	0	0	0	0	0	0	0	0.486	0.617	0.666	0.558	3.647	0.343	0.329	0.000	0.000	0.000	0.000	0.000	0.000	0.000	0.000	0.000	0.000	0.000	0.000	0.000	0.000	156	541	55	131	-1.040	Error	Error	18	37	0	0	50	81	0	0	-50	0
2	9	12	""	"iYDR315C"	8120	16370	130	645	583	226	75	78	31	95	95	0	535	553	221	285	288	78	83	72	0	0	0	0	0	0	0	0	0	0	0	0	0	0	0	0	0	0	0	2.280	1.896	1.946	1.900	2.253	1.646	0.538	0.000	0.000	0.000	0.000	0.000	0.000	0.000	0.000	0.000	0.000	0.000	0.000	0.000	0.000	120	450	820	776	1.189	Error	Error	570	250	0	0	508	268	0	0	0	0
2	10	12	""	"iYDR317W"	8320	16360	150	104	118	75	73	77	30	50	25	0	320	360	165	290	295	80	32	19	0	0	0	0	0	0	0	0	0	0	0	0	0	0	0	0	0	0	0	1.033	0.643	0.478	0.489	3.772	0.254	0.241	0.000	0.000	0.000	0.000	0.000	0.000	0.000	0.000	0.000	0.000	0.000	0.000	0.000	0.000	156	512	61	115	0.047	Error	Error	31	30	0	0	45	70	0	0	-50	0
2	11	12	""	"itK(CUU)E1"	8510	16370	140	310	299	118	72	75	28	97	89	0	911	904	310	283	292	80	92	91	0	0	0	0	0	0	0	0	0	0	0	0	0	0	0	0	0	0	0	0.379	0.366	0.363	0.356	1.939	0.331	0.734	0.000	0.000	0.000	0.000	0.000	0.000	0.000	0.000	0.000	0.000	0.000	0.000	0.000	0.000	156	473	866	848	-1.400	Error	Error	238	628	0	0	227	621	0	0	0	0
2	12	12	""	"iYELWdelta6"	8700	16370	140	326	317	116	71	75	28	99	94	0	1003	958	288	281	289	76	96	95	0	0	0	0	0	0	0	0	0	0	0	0	0	0	0	0	0	0	0	0.353	0.363	0.361	0.359	1.647	0.333	0.734	0.000	0.000	0.000	0.000	0.000	0.000	0.000	0.000	0.000	0.000	0.000	0.000	0.000	0.000	156	430	977	923	-1.502	Error	Error	255	722	0	0	246	677	0	0	0	0
2	13	12	""	"iYEL007W"	8870	16370	140	970	974	413	75	79	31	100	99	0	1875	1842	800	280	290	79	95	94	0	0	0	0	0	0	0	0	0	0	0	0	0	0	0	0	0	0	0	0.561	0.576	0.563	0.627	1.957	0.527	0.860	0.000	0.000	0.000	0.000	0.000	0.000	0.000	0.000	0.000	0.000	0.000	0.000	0.000	0.000	156	454	2490	2461	-0.834	Error	Error	895	1595	0	0	899	1562	0	0	0	0
2	14	12	""	"isnR14"	9070	16380	120	719	687	278	76	78	30	99	96	0	1324	1277	498	292	296	80	95	95	0	0	0	0	0	0	0	0	0	0	0	0	0	0	0	0	0	0	0	0.623	0.620	0.592	0.658	1.956	0.544	0.828	0.000	0.000	0.000	0.000	0.000	0.000	0.000	0.000	0.000	0.000	0.000	0.000	0.000	0.000	120	452	1675	1596	-0.683	Error	Error	643	1032	0	0	611	985	0	0	0	0
2	15	12	""	"iYER010C-1"	9260	16370	120	1175	1249	665	73	76	30	100	99	0	954	947	391	292	297	84	91	87	0	0	0	0	0	0	0	0	0	0	0	0	0	0	0	0	0	0	0	1.665	1.795	1.770	1.782	1.734	1.793	0.832	0.000	0.000	0.000	0.000	0.000	0.000	0.000	0.000	0.000	0.000	0.000	0.000	0.000	0.000	120	459	1764	1831	0.735	Error	Error	1102	662	0	0	1176	655	0	0	0	0
2	16	12	""	"iYER012W"	9440	16370	120	879	814	355	77	82	34	98	96	0	645	629	209	289	310	245	72	19	0	0	0	0	0	0	0	0	0	0	0	0	0	0	0	0	0	0	0	2.253	2.168	2.087	2.125	2.124	2.176	0.669	0.000	0.000	0.000	0.000	0.000	0.000	0.000	0.000	0.000	0.000	0.000	0.000	0.000	0.000	120	460	1158	1077	1.172	Error	Error	802	356	0	0	737	340	0	0	0	0
2	17	12	""	"iYER027C"	9630	16370	140	1173	1141	472	74	78	28	99	99	0	784	767	271	295	302	82	92	87	0	0	0	0	0	0	0	0	0	0	0	0	0	0	0	0	0	0	0	2.247	2.261	2.313	2.299	1.818	2.212	0.762	0.000	0.000	0.000	0.000	0.000	0.000	0.000	0.000	0.000	0.000	0.000	0.000	0.000	0.000	156	474	1588	1539	1.168	Error	Error	1099	489	0	0	1067	472	0	0	0	0
2	18	12	""	"iYER031C"	9820	16370	140	582	591	237	72	76	32	99	96	0	604	616	198	286	293	81	91	83	0	0	0	0	0	0	0	0	0	0	0	0	0	0	0	0	0	0	0	1.604	1.573	1.540	1.612	1.846	1.486	0.617	0.000	0.000	0.000	0.000	0.000	0.000	0.000	0.000	0.000	0.000	0.000	0.000	0.000	0.000	156	521	828	849	0.681	Error	Error	510	318	0	0	519	330	0	0	0	0
2	19	12	""	"iYER035W"	10030	16370	130	512	515	163	72	76	32	100	99	0	1197	1156	306	272	282	79	99	99	0	0	0	0	0	0	0	0	0	0	0	0	0	0	0	0	0	0	0	0.476	0.501	0.500	0.504	1.647	0.467	0.808	0.000	0.000	0.000	0.000	0.000	0.000	0.000	0.000	0.000	0.000	0.000	0.000	0.000	0.000	120	562	1365	1327	-1.072	Error	Error	440	925	0	0	443	884	0	0	0	0
2	20	12	""	"iYERWdelta9"	10220	16370	80	109	148	116	75	77	32	51	38	0	371	418	227	276	280	76	51	36	0	0	0	0	0	0	0	0	0	0	0	0	0	0	0	0	0	0	0	0.358	0.514	0.353	0.347	2.384	0.367	0.471	0.000	0.000	0.000	0.000	0.000	0.000	0.000	0.000	0.000	0.000	0.000	0.000	0.000	0.000	52	316	129	215	-1.482	Error	Error	34	95	0	0	73	142	0	0	0	0
2	21	12	""	"iYER050C"	10420	16370	150	89	127	117	75	77	27	37	25	0	296	340	190	277	280	74	26	14	0	0	0	0	0	0	0	0	0	0	0	0	0	0	0	0	0	0	0	0.737	0.825	0.432	0.504	3.376	0.358	0.252	0.000	0.000	0.000	0.000	0.000	0.000	0.000	0.000	0.000	0.000	0.000	0.000	0.000	0.000	156	607	33	115	-0.441	Error	Error	14	19	0	0	52	63	0	0	-50	0
2	22	12	""	"iYER053C-1"	10610	16370	150	90	121	99	80	83	30	31	19	0	310	342	152	288	291	75	30	16	0	0	0	0	0	0	0	0	0	0	0	0	0	0	0	0	0	0	0	0.455	0.759	0.457	0.459	4.112	0.374	0.264	0.000	0.000	0.000	0.000	0.000	0.000	0.000	0.000	0.000	0.000	0.000	0.000	0.000	0.000	156	756	32	95	-1.138	Error	Error	10	22	0	0	41	54	0	0	-50	0
2	1	13	""	"iYFR048W"	6610	16550	130	1703	1570	481	74	77	30	100	100	0	4843	4585	1271	295	304	98	100	100	0	0	0	0	0	0	0	0	0	0	0	0	0	0	0	0	0	0	0	0.358	0.349	0.357	0.346	1.294	0.332	0.900	0.000	0.000	0.000	0.000	0.000	0.000	0.000	0.000	0.000	0.000	0.000	0.000	0.000	0.000	120	620	6177	5786	-1.481	Error	Error	1629	4548	0	0	1496	4290	0	0	0	0
2	2	13	""	"iYFR052W"	6800	16550	130	757	707	253	77	83	38	100	100	0	1147	1120	361	295	313	107	95	95	0	0	0	0	0	0	0	0	0	0	0	0	0	0	0	0	0	0	0	0.798	0.764	0.783	0.796	1.673	0.710	0.822	0.000	0.000	0.000	0.000	0.000	0.000	0.000	0.000	0.000	0.000	0.000	0.000	0.000	0.000	120	503	1532	1455	-0.325	Error	Error	680	852	0	0	630	825	0	0	0	0
2	3	13	""	"iYFR054C-0"	6990	16550	140	2092	2017	985	73	79	34	100	98	0	3274	3143	1625	286	298	90	94	93	0	0	0	0	0	0	0	0	0	0	0	0	0	0	0	0	0	0	0	0.676	0.680	0.681	0.746	1.731	0.641	0.913	0.000	0.000	0.000	0.000	0.000	0.000	0.000	0.000	0.000	0.000	0.000	0.000	0.000	0.000	156	523	5007	4801	-0.566	Error	Error	2019	2988	0	0	1944	2857	0	0	0	0
2	4	13	""	"iYGL257C"	7180	16550	140	2417	2234	769	73	76	28	99	99	0	1140	1136	376	281	287	76	95	94	0	0	0	0	0	0	0	0	0	0	0	0	0	0	0	0	0	0	0	2.729	2.527	2.513	2.586	1.392	2.529	0.838	0.000	0.000	0.000	0.000	0.000	0.000	0.000	0.000	0.000	0.000	0.000	0.000	0.000	0.000	156	507	3203	3016	1.448	Error	Error	2344	859	0	0	2161	855	0	0	0	0
2	5	13	""	"iYGL256W-3"	7360	16550	130	2644	2561	1045	71	88	120	100	99	0	1255	1213	466	275	301	382	84	69	0	0	0	0	0	0	0	0	0	0	0	0	0	0	0	0	0	0	0	2.626	2.655	2.566	2.814	1.747	2.418	0.598	0.000	0.000	0.000	0.000	0.000	0.000	0.000	0.000	0.000	0.000	0.000	0.000	0.000	0.000	120	502	3553	3428	1.393	Error	Error	2573	980	0	0	2490	938	0	0	0	0
2	6	13	""	"iYGL252C"	7570	16550	130	2586	2308	980	70	89	116	98	98	0	1567	1469	547	276	308	371	89	78	0	0	0	0	0	0	0	0	0	0	0	0	0	0	0	0	0	0	0	1.949	1.876	1.879	1.870	1.388	1.731	0.693	0.000	0.000	0.000	0.000	0.000	0.000	0.000	0.000	0.000	0.000	0.000	0.000	0.000	0.000	120	553	3807	3431	0.963	Error	Error	2516	1291	0	0	2238	1193	0	0	0	0
2	7	13	""	"iYGL233W"	7750	16550	130	322	312	115	77	80	31	95	91	0	711	704	219	284	291	80	91	88	0	0	0	0	0	0	0	0	0	0	0	0	0	0	0	0	0	0	0	0.574	0.560	0.576	0.531	1.977	0.472	0.665	0.000	0.000	0.000	0.000	0.000	0.000	0.000	0.000	0.000	0.000	0.000	0.000	0.000	0.000	120	546	672	655	-0.801	Error	Error	245	427	0	0	235	420	0	0	0	0
2	8	13	""	"iYGL228W"	7950	16550	130	1642	1530	619	76	79	29	100	99	0	1031	984	329	290	295	80	95	92	0	0	0	0	0	0	0	0	0	0	0	0	0	0	0	0	0	0	0	2.113	2.095	2.073	2.115	1.520	2.171	0.826	0.000	0.000	0.000	0.000	0.000	0.000	0.000	0.000	0.000	0.000	0.000	0.000	0.000	0.000	120	544	2307	2148	1.080	Error	Error	1566	741	0	0	1454	694	0	0	0	0
2	9	13	""	"itV(AAC)G3-0"	8140	16550	130	2828	2819	839	76	83	57	100	100	0	1515	1510	571	293	299	94	98	97	0	0	0	0	0	0	0	0	0	0	0	0	0	0	0	0	0	0	0	2.252	2.254	2.314	2.363	1.464	2.165	0.832	0.000	0.000	0.000	0.000	0.000	0.000	0.000	0.000	0.000	0.000	0.000	0.000	0.000	0.000	120	536	3974	3960	1.171	Error	Error	2752	1222	0	0	2743	1217	0	0	0	0
2	10	13	""	"iYGL208W"	8330	16560	140	1399	1340	519	74	80	42	99	98	0	870	855	315	285	300	109	89	85	0	0	0	0	0	0	0	0	0	0	0	0	0	0	0	0	0	0	0	2.265	2.221	2.085	2.361	1.731	2.111	0.781	0.000	0.000	0.000	0.000	0.000	0.000	0.000	0.000	0.000	0.000	0.000	0.000	0.000	0.000	156	571	1910	1836	1.179	Error	Error	1325	585	0	0	1266	570	0	0	0	0
2	11	13	""	"itH(GUG)G1"	8530	16560	130	553	533	179	73	77	38	98	97	0	1186	1156	360	283	297	97	95	95	0	0	0	0	0	0	0	0	0	0	0	0	0	0	0	0	0	0	0	0.532	0.527	0.512	0.521	1.406	0.496	0.818	0.000	0.000	0.000	0.000	0.000	0.000	0.000	0.000	0.000	0.000	0.000	0.000	0.000	0.000	120	507	1383	1333	-0.912	Error	Error	480	903	0	0	460	873	0	0	0	0
2	12	13	""	"itK(UUU)G1"	8720	16560	140	1228	1140	394	72	75	30	99	99	0	998	993	296	283	292	82	96	94	0	0	0	0	0	0	0	0	0	0	0	0	0	0	0	0	0	0	0	1.617	1.504	1.510	1.553	1.548	1.530	0.780	0.000	0.000	0.000	0.000	0.000	0.000	0.000	0.000	0.000	0.000	0.000	0.000	0.000	0.000	156	455	1871	1778	0.693	Error	Error	1156	715	0	0	1068	710	0	0	0	0
2	13	13	""	"iYGR091W"	8900	16560	140	586	561	207	75	80	31	100	96	0	541	559	171	283	297	109	83	62	0	0	0	0	0	0	0	0	0	0	0	0	0	0	0	0	0	0	0	1.981	1.761	1.718	1.819	2.086	1.614	0.448	0.000	0.000	0.000	0.000	0.000	0.000	0.000	0.000	0.000	0.000	0.000	0.000	0.000	0.000	156	453	769	762	0.986	Error	Error	511	258	0	0	486	276	0	0	0	0
2	14	13	""	"iYGR095C"	9090	16560	140	430	407	132	78	80	31	98	96	0	776	769	225	292	300	101	91	87	0	0	0	0	0	0	0	0	0	0	0	0	0	0	0	0	0	0	0	0.727	0.690	0.691	0.717	1.744	0.589	0.707	0.000	0.000	0.000	0.000	0.000	0.000	0.000	0.000	0.000	0.000	0.000	0.000	0.000	0.000	156	538	836	806	-0.459	Error	Error	352	484	0	0	329	477	0	0	0	0
2	15	13	""	"iYGR099W"	9280	16560	120	809	824	359	77	81	36	100	100	0	531	548	150	293	309	240	46	8	0	0	0	0	0	0	0	0	0	0	0	0	0	0	0	0	0	0	0	3.076	2.929	2.929	3.013	1.950	3.063	0.511	0.000	0.000	0.000	0.000	0.000	0.000	0.000	0.000	0.000	0.000	0.000	0.000	0.000	0.000	120	477	970	1002	1.621	Error	Error	732	238	0	0	747	255	0	0	0	0
2	16	13	""	"iYGR111W"	9470	16570	130	963	950	348	78	82	36	100	99	0	654	684	216	290	310	236	79	34	0	0	0	0	0	0	0	0	0	0	0	0	0	0	0	0	0	0	0	2.431	2.213	2.191	2.295	1.606	1.739	0.329	0.000	0.000	0.000	0.000	0.000	0.000	0.000	0.000	0.000	0.000	0.000	0.000	0.000	0.000	120	497	1249	1266	1.282	Error	Error	885	364	0	0	872	394	0	0	0	0
2	17	13	""	"iYGR117C"	9660	16560	140	822	845	394	74	77	33	98	98	0	850	883	344	297	302	82	91	87	0	0	0	0	0	0	0	0	0	0	0	0	0	0	0	0	0	0	0	1.353	1.316	1.333	1.320	1.692	1.255	0.779	0.000	0.000	0.000	0.000	0.000	0.000	0.000	0.000	0.000	0.000	0.000	0.000	0.000	0.000	156	525	1301	1357	0.436	Error	Error	748	553	0	0	771	586	0	0	0	0
2	18	13	""	"itN(GUU)G"	9860	16570	130	346	350	125	70	78	58	95	90	0	439	452	136	285	297	113	68	30	0	0	0	0	0	0	0	0	0	0	0	0	0	0	0	0	0	0	0	1.792	1.677	1.676	1.727	2.364	1.310	0.382	0.000	0.000	0.000	0.000	0.000	0.000	0.000	0.000	0.000	0.000	0.000	0.000	0.000	0.000	120	497	430	447	0.842	Error	Error	276	154	0	0	280	167	0	0	0	0
2	19	13	""	"iYGR133W"	10030	16560	130	996	1003	366	76	84	55	100	100	0	573	574	177	288	316	425	22	0	0	0	0	0	0	0	0	0	0	0	0	0	0	0	0	0	0	0	0	3.228	3.241	3.487	3.446	2.025	3.594	0.499	0.000	0.000	0.000	0.000	0.000	0.000	0.000	0.000	0.000	0.000	0.000	0.000	0.000	0.000	120	562	1205	1213	1.691	Error	Error	920	285	0	0	927	286	0	0	0	0
2	20	13	""	"iYGR138C"	10250	16570	110	277	273	93	76	83	45	92	88	0	494	489	176	282	313	438	7	0	0	0	0	0	0	0	0	0	0	0	0	0	0	0	0	0	0	0	0	0.948	0.952	0.940	1.061	2.533	0.034	0.027	0.000	0.000	0.000	0.000	0.000	0.000	0.000	0.000	0.000	0.000	0.000	0.000	0.000	0.000	80	518	413	404	-0.077	Error	Error	201	212	0	0	197	207	0	0	0	0
2	21	13	""	"iYGR142W"	10430	16570	130	830	833	422	72	74	28	100	99	0	993	996	384	273	281	89	95	90	0	0	0	0	0	0	0	0	0	0	0	0	0	0	0	0	0	0	0	1.053	1.053	1.021	1.018	1.580	1.050	0.802	0.000	0.000	0.000	0.000	0.000	0.000	0.000	0.000	0.000	0.000	0.000	0.000	0.000	0.000	120	537	1478	1484	0.074	Error	Error	758	720	0	0	761	723	0	0	0	0
2	22	13	""	"iYGR154C"	10610	16560	130	1313	1329	622	78	82	32	100	99	0	675	688	237	278	286	85	93	83	0	0	0	0	0	0	0	0	0	0	0	0	0	0	0	0	0	0	0	3.111	3.051	3.256	3.106	1.611	3.144	0.663	0.000	0.000	0.000	0.000	0.000	0.000	0.000	0.000	0.000	0.000	0.000	0.000	0.000	0.000	120	624	1632	1661	1.637	Error	Error	1235	397	0	0	1251	410	0	0	0	0
2	1	14	""	"iYGR158C"	6630	16750	140	993	909	366	72	78	38	100	98	0	2251	2104	775	296	306	91	98	96	0	0	0	0	0	0	0	0	0	0	0	0	0	0	0	0	0	0	0	0.471	0.463	0.465	0.465	1.588	0.447	0.873	0.000	0.000	0.000	0.000	0.000	0.000	0.000	0.000	0.000	0.000	0.000	0.000	0.000	0.000	156	691	2876	2645	-1.086	Error	Error	921	1955	0	0	837	1808	0	0	0	0
2	2	14	""	"iYGRCdelta30"	6820	16750	130	680	688	234	74	82	44	100	99	0	910	909	302	301	311	100	94	90	0	0	0	0	0	0	0	0	0	0	0	0	0	0	0	0	0	0	0	0.995	1.010	1.052	1.076	1.746	0.931	0.734	0.000	0.000	0.000	0.000	0.000	0.000	0.000	0.000	0.000	0.000	0.000	0.000	0.000	0.000	120	535	1215	1222	-0.007	Error	Error	606	609	0	0	614	608	0	0	0	0
2	3	14	""	"iYHR094C"	7010	16750	130	1308	1257	470	73	80	33	100	100	0	760	746	234	292	301	88	93	89	0	0	0	0	0	0	0	0	0	0	0	0	0	0	0	0	0	0	0	2.639	2.608	2.601	2.638	1.584	2.622	0.710	0.000	0.000	0.000	0.000	0.000	0.000	0.000	0.000	0.000	0.000	0.000	0.000	0.000	0.000	120	546	1703	1638	1.400	Error	Error	1235	468	0	0	1184	454	0	0	0	0
2	4	14	""	"iYHR098C"	7200	16750	130	2076	2188	947	73	78	31	100	100	0	812	810	272	282	291	77	97	92	0	0	0	0	0	0	0	0	0	0	0	0	0	0	0	0	0	0	0	3.779	4.006	3.887	4.065	1.557	4.209	0.786	0.000	0.000	0.000	0.000	0.000	0.000	0.000	0.000	0.000	0.000	0.000	0.000	0.000	0.000	120	509	2533	2643	1.918	Error	Error	2003	530	0	0	2115	528	0	0	0	0
2	5	14	""	"iYHR102W"	7380	16750	130	1279	1330	662	71	84	108	99	97	0	838	863	347	286	307	368	70	32	0	0	0	0	0	0	0	0	0	0	0	0	0	0	0	0	0	0	0	2.188	2.182	2.186	2.228	1.792	2.116	0.812	0.000	0.000	0.000	0.000	0.000	0.000	0.000	0.000	0.000	0.000	0.000	0.000	0.000	0.000	120	532	1760	1836	1.130	Error	Error	1208	552	0	0	1259	577	0	0	0	0
2	6	14	""	"iYHR119W"	7570	16750	120	1228	1174	350	71	77	38	100	100	0	922	905	263	289	295	81	98	94	0	0	0	0	0	0	0	0	0	0	0	0	0	0	0	0	0	0	0	1.828	1.791	1.793	1.858	1.565	1.722	0.778	0.000	0.000	0.000	0.000	0.000	0.000	0.000	0.000	0.000	0.000	0.000	0.000	0.000	0.000	120	528	1790	1719	0.870	Error	Error	1157	633	0	0	1103	616	0	0	0	0
2	7	14	""	"iYHR123W"	7770	16750	120	615	638	276	74	78	35	97	96	0	2914	2928	1566	282	293	101	95	95	0	0	0	0	0	0	0	0	0	0	0	0	0	0	0	0	0	0	0	0.206	0.213	0.202	0.236	1.786	0.183	0.831	0.000	0.000	0.000	0.000	0.000	0.000	0.000	0.000	0.000	0.000	0.000	0.000	0.000	0.000	120	512	3173	3210	-2.282	Error	Error	541	2632	0	0	564	2646	0	0	0	0
2	8	14	""	"iYHR127W"	7950	16750	130	387	404	159	75	80	55	97	91	0	1216	1254	480	286	294	92	95	95	0	0	0	0	0	0	0	0	0	0	0	0	0	0	0	0	0	0	0	0.335	0.340	0.333	0.348	1.802	0.295	0.773	0.000	0.000	0.000	0.000	0.000	0.000	0.000	0.000	0.000	0.000	0.000	0.000	0.000	0.000	120	565	1242	1297	-1.576	Error	Error	312	930	0	0	329	968	0	0	0	0
2	9	14	""	"iYHR143W"	8160	16760	130	1008	1046	542	74	82	64	100	96	0	1002	1060	445	292	297	91	95	92	0	0	0	0	0	0	0	0	0	0	0	0	0	0	0	0	0	0	0	1.315	1.266	1.240	1.322	1.641	1.273	0.803	0.000	0.000	0.000	0.000	0.000	0.000	0.000	0.000	0.000	0.000	0.000	0.000	0.000	0.000	120	498	1644	1740	0.396	Error	Error	934	710	0	0	972	768	0	0	0	0
2	10	14	""	"iYHRCdelta11"	8330	16750	130	715	684	250	75	87	61	100	98	0	591	606	202	287	301	108	86	73	0	0	0	0	0	0	0	0	0	0	0	0	0	0	0	0	0	0	0	2.105	1.909	1.882	2.065	1.813	1.599	0.644	0.000	0.000	0.000	0.000	0.000	0.000	0.000	0.000	0.000	0.000	0.000	0.000	0.000	0.000	120	514	944	928	1.074	Error	Error	640	304	0	0	609	319	0	0	0	0
2	11	14	""	"iYHR149C"	8540	16760	130	522	542	276	74	84	61	93	89	0	590	623	230	289	305	111	88	66	0	0	0	0	0	0	0	0	0	0	0	0	0	0	0	0	0	0	0	1.488	1.401	1.417	1.372	1.958	1.286	0.628	0.000	0.000	0.000	0.000	0.000	0.000	0.000	0.000	0.000	0.000	0.000	0.000	0.000	0.000	120	512	749	802	0.574	Error	Error	448	301	0	0	468	334	0	0	0	0
2	12	14	""	"iYHR164C"	8720	16750	130	1120	1047	334	72	74	29	100	100	0	832	819	225	285	292	82	97	95	0	0	0	0	0	0	0	0	0	0	0	0	0	0	0	0	0	0	0	1.916	1.826	1.808	1.846	1.544	1.838	0.742	0.000	0.000	0.000	0.000	0.000	0.000	0.000	0.000	0.000	0.000	0.000	0.000	0.000	0.000	120	458	1595	1509	0.938	Error	Error	1048	547	0	0	975	534	0	0	0	0
2	13	14	""	"iYHR168W"	8910	16750	130	735	718	262	74	82	44	98	98	0	544	538	166	286	299	118	80	55	0	0	0	0	0	0	0	0	0	0	0	0	0	0	0	0	0	0	0	2.562	2.556	2.587	2.707	2.013	2.402	0.493	0.000	0.000	0.000	0.000	0.000	0.000	0.000	0.000	0.000	0.000	0.000	0.000	0.000	0.000	120	484	919	896	1.357	Error	Error	661	258	0	0	644	252	0	0	0	0
2	14	14	""	"iYHR173C"	9100	16760	130	334	342	121	78	81	33	95	91	0	485	496	154	276	292	109	83	49	0	0	0	0	0	0	0	0	0	0	0	0	0	0	0	0	0	0	0	1.225	1.200	1.199	1.145	2.333	0.891	0.403	0.000	0.000	0.000	0.000	0.000	0.000	0.000	0.000	0.000	0.000	0.000	0.000	0.000	0.000	120	525	465	484	0.293	Error	Error	256	209	0	0	264	220	0	0	0	0
2	15	14	""	"itT(AGU)J"	9300	16750	130	561	552	226	76	80	35	99	98	0	701	688	207	283	291	91	90	85	0	0	0	0	0	0	0	0	0	0	0	0	0	0	0	0	0	0	0	1.160	1.175	1.169	1.179	1.769	1.058	0.688	0.000	0.000	0.000	0.000	0.000	0.000	0.000	0.000	0.000	0.000	0.000	0.000	0.000	0.000	120	524	903	881	0.214	Error	Error	485	418	0	0	476	405	0	0	0	0
2	16	14	""	"iYJL197W"	9480	16750	120	862	816	334	76	77	30	100	100	0	1030	1007	370	290	294	82	94	90	0	0	0	0	0	0	0	0	0	0	0	0	0	0	0	0	0	0	0	1.062	1.032	1.032	1.044	1.571	0.956	0.788	0.000	0.000	0.000	0.000	0.000	0.000	0.000	0.000	0.000	0.000	0.000	0.000	0.000	0.000	120	431	1526	1457	0.087	Error	Error	786	740	0	0	740	717	0	0	0	0
2	17	14	""	"iYJL192C"	9660	16750	130	750	720	265	76	79	36	100	100	0	772	784	233	299	304	90	92	90	0	0	0	0	0	0	0	0	0	0	0	0	0	0	0	0	0	0	0	1.425	1.328	1.309	1.388	1.911	1.278	0.756	0.000	0.000	0.000	0.000	0.000	0.000	0.000	0.000	0.000	0.000	0.000	0.000	0.000	0.000	120	488	1147	1129	0.511	Error	Error	674	473	0	0	644	485	0	0	0	0
2	18	14	""	"iYJL173C"	9850	16750	130	1686	1633	491	74	90	97	100	100	0	1687	1657	491	293	322	204	99	95	0	0	0	0	0	0	0	0	0	0	0	0	0	0	0	0	0	0	0	1.156	1.143	1.155	1.171	1.394	1.112	0.846	0.000	0.000	0.000	0.000	0.000	0.000	0.000	0.000	0.000	0.000	0.000	0.000	0.000	0.000	120	527	3006	2923	0.210	Error	Error	1612	1394	0	0	1559	1364	0	0	0	0
2	19	14	""	"iYJL168C"	10060	16750	140	1496	1361	589	77	92	94	98	96	0	816	783	280	285	332	457	58	6	0	0	0	0	0	0	0	0	0	0	0	0	0	0	0	0	0	0	0	2.672	2.578	2.638	2.587	1.713	2.383	0.619	0.000	0.000	0.000	0.000	0.000	0.000	0.000	0.000	0.000	0.000	0.000	0.000	0.000	0.000	156	558	1950	1782	1.418	Error	Error	1419	531	0	0	1284	498	0	0	0	0
2	20	14	""	"iYJL164C"	10240	16760	130	1281	1350	721	76	81	34	100	99	0	875	855	328	281	322	507	58	8	0	0	0	0	0	0	0	0	0	0	0	0	0	0	0	0	0	0	0	2.029	2.220	2.366	2.246	1.936	2.359	0.767	0.000	0.000	0.000	0.000	0.000	0.000	0.000	0.000	0.000	0.000	0.000	0.000	0.000	0.000	120	465	1799	1848	1.020	Error	Error	1205	594	0	0	1274	574	0	0	0	0
2	21	14	""	"isnR128"	10430	16760	120	306	307	127	74	78	32	94	87	0	516	524	170	276	284	92	86	65	0	0	0	0	0	0	0	0	0	0	0	0	0	0	0	0	0	0	0	0.967	0.940	0.909	0.912	2.014	0.739	0.539	0.000	0.000	0.000	0.000	0.000	0.000	0.000	0.000	0.000	0.000	0.000	0.000	0.000	0.000	120	444	472	481	-0.049	Error	Error	232	240	0	0	233	248	0	0	0	0
2	22	14	""	"iYJL146W"	10620	16760	130	1093	1087	482	79	83	33	98	98	0	879	880	331	281	289	85	94	90	0	0	0	0	0	0	0	0	0	0	0	0	0	0	0	0	0	0	0	1.696	1.683	1.723	1.654	1.813	1.652	0.773	0.000	0.000	0.000	0.000	0.000	0.000	0.000	0.000	0.000	0.000	0.000	0.000	0.000	0.000	120	659	1612	1607	0.762	Error	Error	1014	598	0	0	1008	599	0	0	0	0
2	1	15	""	"iYJL141C"	6620	16940	140	1278	1247	660	68	72	36	100	98	0	1083	1049	493	288	293	84	91	87	0	0	0	0	0	0	0	0	0	0	0	0	0	0	0	0	0	0	0	1.522	1.549	1.536	1.617	1.787	1.492	0.828	0.000	0.000	0.000	0.000	0.000	0.000	0.000	0.000	0.000	0.000	0.000	0.000	0.000	0.000	156	598	2005	1940	0.606	Error	Error	1210	795	0	0	1179	761	0	0	0	0
2	2	15	""	"iYJL125C"	6800	16940	130	1295	1172	451	68	73	31	100	100	0	757	739	240	298	300	82	91	85	0	0	0	0	0	0	0	0	0	0	0	0	0	0	0	0	0	0	0	2.673	2.503	2.567	2.612	1.828	2.390	0.750	0.000	0.000	0.000	0.000	0.000	0.000	0.000	0.000	0.000	0.000	0.000	0.000	0.000	0.000	120	432	1686	1545	1.419	Error	Error	1227	459	0	0	1104	441	0	0	0	0
2	3	15	""	"iYJL120W"	6990	16950	130	576	576	238	69	77	33	98	98	0	500	489	144	295	299	81	75	61	0	0	0	0	0	0	0	0	0	0	0	0	0	0	0	0	0	0	0	2.473	2.613	2.520	2.551	2.213	2.655	0.388	0.000	0.000	0.000	0.000	0.000	0.000	0.000	0.000	0.000	0.000	0.000	0.000	0.000	0.000	120	471	712	701	1.306	Error	Error	507	205	0	0	507	194	0	0	0	0
2	4	15	""	"iYJL115W"	7180	16940	130	830	796	225	73	78	34	100	100	0	947	970	270	283	291	78	99	98	0	0	0	0	0	0	0	0	0	0	0	0	0	0	0	0	0	0	0	1.140	1.052	1.019	1.073	1.512	0.977	0.755	0.000	0.000	0.000	0.000	0.000	0.000	0.000	0.000	0.000	0.000	0.000	0.000	0.000	0.000	120	480	1421	1410	0.189	Error	Error	757	664	0	0	723	687	0	0	0	0
2	5	15	""	"iYKL211C"	7370	16930	130	1225	1259	521	71	76	32	100	100	0	709	716	275	291	293	74	90	86	0	0	0	0	0	0	0	0	0	0	0	0	0	0	0	0	0	0	0	2.761	2.795	2.866	3.018	1.867	2.692	0.712	0.000	0.000	0.000	0.000	0.000	0.000	0.000	0.000	0.000	0.000	0.000	0.000	0.000	0.000	120	483	1572	1613	1.465	Error	Error	1154	418	0	0	1188	425	0	0	0	0
2	6	15	""	"itT(CGU)K"	7560	16940	130	977	927	309	73	75	31	100	99	0	589	590	172	294	299	77	90	76	0	0	0	0	0	0	0	0	0	0	0	0	0	0	0	0	0	0	0	3.064	2.885	2.935	3.063	1.824	2.854	0.607	0.000	0.000	0.000	0.000	0.000	0.000	0.000	0.000	0.000	0.000	0.000	0.000	0.000	0.000	120	502	1199	1150	1.616	Error	Error	904	295	0	0	854	296	0	0	0	0
2	7	15	""	"iYKL205W"	7750	16940	120	1004	961	281	73	72	25	100	100	0	1055	1022	279	284	287	79	97	96	0	0	0	0	0	0	0	0	0	0	0	0	0	0	0	0	0	0	0	1.208	1.203	1.246	1.254	1.524	1.143	0.805	0.000	0.000	0.000	0.000	0.000	0.000	0.000	0.000	0.000	0.000	0.000	0.000	0.000	0.000	120	476	1702	1626	0.272	Error	Error	931	771	0	0	888	738	0	0	0	0
2	8	15	""	"iYKLCdelta2"	7940	16940	130	345	328	109	70	72	25	98	94	0	632	649	228	280	283	74	87	87	0	0	0	0	0	0	0	0	0	0	0	0	0	0	0	0	0	0	0	0.781	0.699	0.701	0.760	2.191	0.542	0.654	0.000	0.000	0.000	0.000	0.000	0.000	0.000	0.000	0.000	0.000	0.000	0.000	0.000	0.000	120	478	627	627	-0.356	Error	Error	275	352	0	0	258	369	0	0	0	0
2	9	15	""	"iYKL187C"	8120	16930	130	870	882	367	71	77	41	99	98	0	692	709	245	283	288	70	93	90	0	0	0	0	0	0	0	0	0	0	0	0	0	0	0	0	0	0	0	1.954	1.904	1.882	1.874	1.777	2.004	0.672	0.000	0.000	0.000	0.000	0.000	0.000	0.000	0.000	0.000	0.000	0.000	0.000	0.000	0.000	120	469	1208	1237	0.966	Error	Error	799	409	0	0	811	426	0	0	0	0
2	10	15	""	"iYKL183W"	8300	16930	130	1030	1061	455	74	81	42	98	98	0	567	566	196	281	288	82	86	73	0	0	0	0	0	0	0	0	0	0	0	0	0	0	0	0	0	0	0	3.343	3.463	3.454	3.668	2.034	3.556	0.616	0.000	0.000	0.000	0.000	0.000	0.000	0.000	0.000	0.000	0.000	0.000	0.000	0.000	0.000	120	479	1242	1272	1.741	Error	Error	956	286	0	0	987	285	0	0	0	0
2	11	15	""	"iYKL166C-1"	8510	16940	130	1144	1113	473	74	83	49	98	98	0	834	813	307	281	297	160	86	78	0	0	0	0	0	0	0	0	0	0	0	0	0	0	0	0	0	0	0	1.935	1.953	1.946	2.008	1.693	1.899	0.762	0.000	0.000	0.000	0.000	0.000	0.000	0.000	0.000	0.000	0.000	0.000	0.000	0.000	0.000	120	481	1623	1571	0.952	Error	Error	1070	553	0	0	1039	532	0	0	0	0
2	12	15	""	"iYKL164C-1"	8680	16940	140	1047	1038	397	70	75	43	98	98	0	626	629	219	286	305	235	70	28	0	0	0	0	0	0	0	0	0	0	0	0	0	0	0	0	0	0	0	2.874	2.822	2.835	2.963	1.925	2.693	0.674	0.000	0.000	0.000	0.000	0.000	0.000	0.000	0.000	0.000	0.000	0.000	0.000	0.000	0.000	156	467	1317	1311	1.523	Error	Error	977	340	0	0	968	343	0	0	0	0
2	13	15	""	"iYKL162C"	8870	16930	130	1595	1618	646	73	82	48	99	98	0	1134	1161	430	287	295	105	94	92	0	0	0	0	0	0	0	0	0	0	0	0	0	0	0	0	0	0	0	1.797	1.768	1.762	1.839	1.688	1.761	0.827	0.000	0.000	0.000	0.000	0.000	0.000	0.000	0.000	0.000	0.000	0.000	0.000	0.000	0.000	120	488	2369	2419	0.846	Error	Error	1522	847	0	0	1545	874	0	0	0	0
2	14	15	""	"iYKL148C"	9060	16940	130	742	726	294	74	84	51	99	95	0	550	542	185	279	298	108	80	63	0	0	0	0	0	0	0	0	0	0	0	0	0	0	0	0	0	0	0	2.465	2.479	2.246	2.549	1.864	2.182	0.512	0.000	0.000	0.000	0.000	0.000	0.000	0.000	0.000	0.000	0.000	0.000	0.000	0.000	0.000	120	514	939	915	1.302	Error	Error	668	271	0	0	652	263	0	0	0	0
2	15	15	""	"iYKL143W"	9250	16940	130	887	834	247	77	80	32	100	99	0	594	588	170	276	287	87	91	83	0	0	0	0	0	0	0	0	0	0	0	0	0	0	0	0	0	0	0	2.547	2.426	2.371	2.531	1.767	2.481	0.623	0.000	0.000	0.000	0.000	0.000	0.000	0.000	0.000	0.000	0.000	0.000	0.000	0.000	0.000	120	533	1128	1069	1.349	Error	Error	810	318	0	0	757	312	0	0	0	0
2	16	15	""	"iYKL139W"	9450	16940	130	886	918	473	77	83	38	97	95	0	6714	6636	3578	289	292	75	95	95	0	0	0	0	0	0	0	0	0	0	0	0	0	0	0	0	0	0	0	0.126	0.133	0.132	0.144	1.898	0.123	0.885	0.000	0.000	0.000	0.000	0.000	0.000	0.000	0.000	0.000	0.000	0.000	0.000	0.000	0.000	120	546	7234	7188	-2.989	Error	Error	809	6425	0	0	841	6347	0	0	0	0
2	17	15	""	"iYLL025W"	9630	16930	130	1081	998	355	77	81	31	100	99	0	3104	2986	1040	293	301	83	100	98	0	0	0	0	0	0	0	0	0	0	0	0	0	0	0	0	0	0	0	0.357	0.342	0.347	0.350	1.388	0.317	0.884	0.000	0.000	0.000	0.000	0.000	0.000	0.000	0.000	0.000	0.000	0.000	0.000	0.000	0.000	120	508	3815	3614	-1.485	Error	Error	1004	2811	0	0	921	2693	0	0	0	0
2	18	15	""	"iYLL021W"	9830	16940	130	213	225	96	75	80	38	89	77	0	727	738	272	285	303	125	89	83	0	0	0	0	0	0	0	0	0	0	0	0	0	0	0	0	0	0	0	0.312	0.331	0.326	0.290	2.154	0.254	0.532	0.000	0.000	0.000	0.000	0.000	0.000	0.000	0.000	0.000	0.000	0.000	0.000	0.000	0.000	120	506	580	603	-1.679	Error	Error	138	442	0	0	150	453	0	0	0	0
2	19	15	""	"iYLL017W"	10010	16940	130	614	680	357	75	84	70	95	92	0	621	621	240	280	305	163	77	50	0	0	0	0	0	0	0	0	0	0	0	0	0	0	0	0	0	0	0	1.581	1.774	1.722	1.689	2.219	1.696	0.710	0.000	0.000	0.000	0.000	0.000	0.000	0.000	0.000	0.000	0.000	0.000	0.000	0.000	0.000	120	468	880	946	0.661	Error	Error	539	341	0	0	605	341	0	0	0	0
2	20	15	""	"iYLL001W"	10200	16930	130	692	688	243	76	80	38	98	98	0	6732	6446	2408	285	318	284	99	97	0	0	0	0	0	0	0	0	0	0	0	0	0	0	0	0	0	0	0	0.096	0.099	0.098	0.100	1.378	0.093	0.889	0.000	0.000	0.000	0.000	0.000	0.000	0.000	0.000	0.000	0.000	0.000	0.000	0.000	0.000	120	433	7063	6773	-3.388	Error	Error	616	6447	0	0	612	6161	0	0	0	0
2	21	15	""	"iYLR003C"	10390	16940	150	397	380	165	75	79	32	93	91	0	977	941	362	281	310	266	82	71	0	0	0	0	0	0	0	0	0	0	0	0	0	0	0	0	0	0	0	0.463	0.462	0.459	0.435	1.613	0.320	0.565	0.000	0.000	0.000	0.000	0.000	0.000	0.000	0.000	0.000	0.000	0.000	0.000	0.000	0.000	156	491	1018	965	-1.112	Error	Error	322	696	0	0	305	660	0	0	0	0
2	22	15	""	"iYLR007W"	10570	16940	120	425	421	154	74	76	28	96	92	0	1038	1017	344	277	281	71	96	94	0	0	0	0	0	0	0	0	0	0	0	0	0	0	0	0	0	0	0	0.461	0.469	0.470	0.457	1.669	0.412	0.781	0.000	0.000	0.000	0.000	0.000	0.000	0.000	0.000	0.000	0.000	0.000	0.000	0.000	0.000	120	500	1112	1087	-1.116	Error	Error	351	761	0	0	347	740	0	0	0	0
2	1	16	""	"iYLR024C"	6590	17110	120	902	965	466	70	72	35	100	100	0	690	751	294	280	283	83	95	86	0	0	0	0	0	0	0	0	0	0	0	0	0	0	0	0	0	0	0	2.029	1.900	1.974	2.029	1.770	0.144	0.050	0.000	0.000	0.000	0.000	0.000	0.000	0.000	0.000	0.000	0.000	0.000	0.000	0.000	0.000	120	465	1242	1366	1.021	Error	Error	832	410	0	0	895	471	0	0	0	0
2	2	16	""	"iYLR028C"	6780	17120	140	1043	991	378	71	74	35	100	100	0	794	997	2636	281	288	76	94	92	0	0	0	0	0	0	0	0	0	0	0	0	0	0	0	0	0	0	0	1.895	1.285	1.809	1.815	1.793	0.081	0.054	0.000	0.000	0.000	0.000	0.000	0.000	0.000	0.000	0.000	0.000	0.000	0.000	0.000	0.000	156	473	1485	1636	0.922	Error	Error	972	513	0	0	920	716	0	0	0	0
2	3	16	""	"iYLR032W"	6970	17120	140	741	713	279	68	72	34	99	98	0	1237	1203	419	279	291	81	96	96	0	0	0	0	0	0	0	0	0	0	0	0	0	0	0	0	0	0	0	0.703	0.698	0.727	0.721	1.700	0.663	0.803	0.000	0.000	0.000	0.000	0.000	0.000	0.000	0.000	0.000	0.000	0.000	0.000	0.000	0.000	156	465	1631	1569	-0.509	Error	Error	673	958	0	0	645	924	0	0	0	0
2	4	16	""	"iYLR044C"	7160	17120	140	2149	2067	724	68	72	30	100	99	0	883	867	235	276	286	78	98	94	0	0	0	0	0	0	0	0	0	0	0	0	0	0	0	0	0	0	0	3.428	3.382	3.500	3.452	1.747	3.537	0.794	0.000	0.000	0.000	0.000	0.000	0.000	0.000	0.000	0.000	0.000	0.000	0.000	0.000	0.000	156	472	2688	2590	1.778	Error	Error	2081	607	0	0	1999	591	0	0	0	0
2	5	16	""	"iYLR048W"	7350	17120	140	596	608	272	69	73	30	98	96	0	1125	1099	403	281	287	77	96	93	0	0	0	0	0	0	0	0	0	0	0	0	0	0	0	0	0	0	0	0.624	0.659	0.655	0.662	1.738	0.641	0.823	0.000	0.000	0.000	0.000	0.000	0.000	0.000	0.000	0.000	0.000	0.000	0.000	0.000	0.000	156	507	1371	1357	-0.679	Error	Error	527	844	0	0	539	818	0	0	0	0
2	6	16	""	"iYLR052W"	7540	17120	140	641	597	249	71	75	32	98	95	0	635	618	203	291	294	82	85	75	0	0	0	0	0	0	0	0	0	0	0	0	0	0	0	0	0	0	0	1.657	1.609	1.531	1.630	1.861	1.486	0.663	0.000	0.000	0.000	0.000	0.000	0.000	0.000	0.000	0.000	0.000	0.000	0.000	0.000	0.000	156	528	914	853	0.729	Error	Error	570	344	0	0	526	327	0	0	0	0
2	7	16	""	"iYLR364W"	7740	17120	130	1796	1764	634	70	73	33	100	100	0	884	898	284	284	287	82	96	95	0	0	0	0	0	0	0	0	0	0	0	0	0	0	0	0	0	0	0	2.877	2.759	2.918	2.792	1.479	2.769	0.754	0.000	0.000	0.000	0.000	0.000	0.000	0.000	0.000	0.000	0.000	0.000	0.000	0.000	0.000	120	511	2326	2308	1.524	Error	Error	1726	600	0	0	1694	614	0	0	0	0
2	8	16	""	"iYLR369W"	7930	17120	140	791	727	281	70	73	31	98	97	0	1235	1184	417	275	282	72	96	93	0	0	0	0	0	0	0	0	0	0	0	0	0	0	0	0	0	0	0	0.751	0.723	0.733	0.735	1.713	0.695	0.849	0.000	0.000	0.000	0.000	0.000	0.000	0.000	0.000	0.000	0.000	0.000	0.000	0.000	0.000	156	547	1681	1566	-0.413	Error	Error	721	960	0	0	657	909	0	0	0	0
2	9	16	""	"iYLR373C"	8120	17120	130	387	372	120	70	74	32	99	99	0	476	476	144	281	286	72	83	63	0	0	0	0	0	0	0	0	0	0	0	0	0	0	0	0	0	0	0	1.626	1.549	1.581	1.664	1.910	1.162	0.481	0.000	0.000	0.000	0.000	0.000	0.000	0.000	0.000	0.000	0.000	0.000	0.000	0.000	0.000	120	512	512	497	0.701	Error	Error	317	195	0	0	302	195	0	0	0	0
2	10	16	""	"iYLR389C"	8310	17120	140	1396	1310	425	74	79	33	99	99	0	741	731	219	279	287	77	94	90	0	0	0	0	0	0	0	0	0	0	0	0	0	0	0	0	0	0	0	2.861	2.735	2.835	2.861	1.630	2.740	0.716	0.000	0.000	0.000	0.000	0.000	0.000	0.000	0.000	0.000	0.000	0.000	0.000	0.000	0.000	156	581	1784	1688	1.517	Error	Error	1322	462	0	0	1236	452	0	0	0	0
2	11	16	""	"iYLR394W"	8500	17120	130	1831	1735	492	74	81	52	100	100	0	5381	5183	1575	284	324	324	100	99	0	0	0	0	0	0	0	0	0	0	0	0	0	0	0	0	0	0	0	0.345	0.339	0.340	0.346	1.284	0.318	0.912	0.000	0.000	0.000	0.000	0.000	0.000	0.000	0.000	0.000	0.000	0.000	0.000	0.000	0.000	120	490	6854	6560	-1.537	Error	Error	1757	5097	0	0	1661	4899	0	0	0	0
2	12	16	""	"iYLR398C"	8690	17120	130	1148	1145	449	69	78	54	100	100	0	901	914	319	280	321	329	84	45	0	0	0	0	0	0	0	0	0	0	0	0	0	0	0	0	0	0	0	1.738	1.697	1.755	1.718	1.475	1.343	0.445	0.000	0.000	0.000	0.000	0.000	0.000	0.000	0.000	0.000	0.000	0.000	0.000	0.000	0.000	120	475	1700	1710	0.797	Error	Error	1079	621	0	0	1076	634	0	0	0	0
2	13	16	""	"iYLR412W-1"	8880	17120	130	1250	1239	417	74	89	90	100	98	0	1179	1148	362	287	308	149	96	94	0	0	0	0	0	0	0	0	0	0	0	0	0	0	0	0	0	0	0	1.318	1.353	1.415	1.409	1.532	1.343	0.816	0.000	0.000	0.000	0.000	0.000	0.000	0.000	0.000	0.000	0.000	0.000	0.000	0.000	0.000	120	552	2068	2026	0.399	Error	Error	1176	892	0	0	1165	861	0	0	0	0
2	14	16	""	"iYLR417W"	9090	17130	130	805	770	261	73	87	89	97	95	0	1926	1840	541	280	301	144	97	97	0	0	0	0	0	0	0	0	0	0	0	0	0	0	0	0	0	0	0	0.445	0.447	0.425	0.444	1.408	0.432	0.850	0.000	0.000	0.000	0.000	0.000	0.000	0.000	0.000	0.000	0.000	0.000	0.000	0.000	0.000	120	540	2378	2257	-1.169	Error	Error	732	1646	0	0	697	1560	0	0	0	0
2	15	16	""	"iYLRCdelta24"	9280	17130	130	785	760	247	73	81	53	100	99	0	843	829	232	281	288	74	97	94	0	0	0	0	0	0	0	0	0	0	0	0	0	0	0	0	0	0	0	1.267	1.254	1.249	1.273	1.452	1.224	0.783	0.000	0.000	0.000	0.000	0.000	0.000	0.000	0.000	0.000	0.000	0.000	0.000	0.000	0.000	120	515	1274	1235	0.341	Error	Error	712	562	0	0	687	548	0	0	0	0
2	16	16	""	"iYLR436C"	9460	17130	110	497	536	216	77	86	55	100	98	0	522	510	150	285	288	72	82	71	0	0	0	0	0	0	0	0	0	0	0	0	0	0	0	0	0	0	0	1.772	2.040	1.956	2.110	2.271	2.095	0.418	0.000	0.000	0.000	0.000	0.000	0.000	0.000	0.000	0.000	0.000	0.000	0.000	0.000	0.000	80	432	657	684	0.826	Error	Error	420	237	0	0	459	225	0	0	0	0
2	17	16	""	"iYLR439W"	9660	17130	140	438	435	158	75	80	31	98	95	0	1639	1621	572	283	289	79	96	96	0	0	0	0	0	0	0	0	0	0	0	0	0	0	0	0	0	0	0	0.268	0.269	0.266	0.267	1.584	0.253	0.822	0.000	0.000	0.000	0.000	0.000	0.000	0.000	0.000	0.000	0.000	0.000	0.000	0.000	0.000	156	556	1719	1698	-1.901	Error	Error	363	1356	0	0	360	1338	0	0	0	0
2	18	16	""	"iYLR444C"	9850	17130	140	502	492	149	75	79	35	100	98	0	607	613	184	282	284	73	91	84	0	0	0	0	0	0	0	0	0	0	0	0	0	0	0	0	0	0	0	1.314	1.260	1.275	1.377	1.765	1.099	0.654	0.000	0.000	0.000	0.000	0.000	0.000	0.000	0.000	0.000	0.000	0.000	0.000	0.000	0.000	156	515	752	748	0.394	Error	Error	427	325	0	0	417	331	0	0	0	0
2	19	16	""	"iYMR130W"	10040	17130	140	459	439	145	78	81	35	97	97	0	3048	2864	859	289	295	86	98	98	0	0	0	0	0	0	0	0	0	0	0	0	0	0	0	0	0	0	0	0.138	0.140	0.137	0.134	1.495	0.136	0.852	0.000	0.000	0.000	0.000	0.000	0.000	0.000	0.000	0.000	0.000	0.000	0.000	0.000	0.000	156	512	3140	2936	-2.856	Error	Error	381	2759	0	0	361	2575	0	0	0	0
2	20	16	""	"iYMR134W"	10220	17130	140	671	898	646	75	80	36	98	98	0	1029	1239	731	289	313	195	92	80	0	0	0	0	0	0	0	0	0	0	0	0	0	0	0	0	0	0	0	0.805	0.866	0.894	0.867	1.724	0.858	0.829	0.000	0.000	0.000	0.000	0.000	0.000	0.000	0.000	0.000	0.000	0.000	0.000	0.000	0.000	156	505	1336	1773	-0.312	Error	Error	596	740	0	0	823	950	0	0	0	0
2	21	16	""	"iYMR138W"	10410	17130	140	1193	1275	619	73	77	31	100	99	0	656	690	292	281	295	137	84	72	0	0	0	0	0	0	0	0	0	0	0	0	0	0	0	0	0	0	0	2.987	2.939	3.102	2.972	1.756	2.833	0.726	0.000	0.000	0.000	0.000	0.000	0.000	0.000	0.000	0.000	0.000	0.000	0.000	0.000	0.000	156	513	1495	1611	1.579	Error	Error	1120	375	0	0	1202	409	0	0	0	0
2	22	16	""	"iYMR155W"	10600	17130	120	474	474	146	75	78	33	99	99	0	1094	1079	280	275	277	72	97	97	0	0	0	0	0	0	0	0	0	0	0	0	0	0	0	0	0	0	0	0.487	0.496	0.508	0.480	1.531	0.441	0.779	0.000	0.000	0.000	0.000	0.000	0.000	0.000	0.000	0.000	0.000	0.000	0.000	0.000	0.000	120	565	1218	1203	-1.037	Error	Error	399	819	0	0	399	804	0	0	0	0
2	1	17	""	"itM(CAU)M"	6610	17310	130	415	424	134	71	74	34	99	97	0	822	813	229	281	284	79	96	95	0	0	0	0	0	0	0	0	0	0	0	0	0	0	0	0	0	0	0	0.636	0.664	0.675	0.676	1.524	0.569	0.755	0.000	0.000	0.000	0.000	0.000	0.000	0.000	0.000	0.000	0.000	0.000	0.000	0.000	0.000	120	653	885	885	-0.653	Error	Error	344	541	0	0	353	532	0	0	0	0
2	2	17	""	"iYMR161W"	6820	17320	140	1173	1095	421	70	73	30	98	98	0	5530	5187	1792	275	283	78	98	98	0	0	0	0	0	0	0	0	0	0	0	0	0	0	0	0	0	0	0	0.210	0.209	0.214	0.209	1.512	0.207	0.893	0.000	0.000	0.000	0.000	0.000	0.000	0.000	0.000	0.000	0.000	0.000	0.000	0.000	0.000	156	569	6358	5937	-2.252	Error	Error	1103	5255	0	0	1025	4912	0	0	0	0
2	3	17	""	"iYMR176W"	7010	17320	130	2229	2096	794	69	71	31	100	100	0	1364	1399	439	280	288	80	97	96	0	0	0	0	0	0	0	0	0	0	0	0	0	0	0	0	0	0	0	1.993	1.811	1.842	1.836	1.527	1.835	0.840	0.000	0.000	0.000	0.000	0.000	0.000	0.000	0.000	0.000	0.000	0.000	0.000	0.000	0.000	120	470	3244	3146	0.995	Error	Error	2160	1084	0	0	2027	1119	0	0	0	0
2	4	17	""	"iYMR180C"	7190	17310	130	939	921	258	69	72	30	100	99	0	805	826	231	275	285	83	97	97	0	0	0	0	0	0	0	0	0	0	0	0	0	0	0	0	0	0	0	1.642	1.546	1.573	1.591	1.469	1.549	0.784	0.000	0.000	0.000	0.000	0.000	0.000	0.000	0.000	0.000	0.000	0.000	0.000	0.000	0.000	120	499	1400	1403	0.715	Error	Error	870	530	0	0	852	551	0	0	0	0
2	5	17	""	"iYMR183C"	7380	17320	130	1082	1064	446	70	74	31	100	99	0	1151	1103	425	282	293	89	94	93	0	0	0	0	0	0	0	0	0	0	0	0	0	0	0	0	0	0	0	1.165	1.211	1.236	1.269	1.578	1.160	0.828	0.000	0.000	0.000	0.000	0.000	0.000	0.000	0.000	0.000	0.000	0.000	0.000	0.000	0.000	120	511	1881	1815	0.220	Error	Error	1012	869	0	0	994	821	0	0	0	0
2	6	17	""	"iYMR198W"	7570	17320	140	2975	2719	1104	70	74	32	99	99	0	1477	1340	576	290	295	87	91	89	0	0	0	0	0	0	0	0	0	0	0	0	0	0	0	0	0	0	0	2.447	2.523	2.544	2.782	1.719	2.444	0.861	0.000	0.000	0.000	0.000	0.000	0.000	0.000	0.000	0.000	0.000	0.000	0.000	0.000	0.000	156	598	4092	3699	1.291	Error	Error	2905	1187	0	0	2649	1050	0	0	0	0
2	7	17	""	"iYMR202W"	7770	17320	120	387	368	122	70	74	35	97	93	0	848	804	262	282	287	83	92	90	0	0	0	0	0	0	0	0	0	0	0	0	0	0	0	0	0	0	0	0.560	0.571	0.571	0.585	2.008	0.480	0.724	0.000	0.000	0.000	0.000	0.000	0.000	0.000	0.000	0.000	0.000	0.000	0.000	0.000	0.000	120	492	883	820	-0.836	Error	Error	317	566	0	0	298	522	0	0	0	0
2	8	17	""	"iYMR206W"	7950	17320	130	1681	1634	494	72	74	30	100	100	0	1657	1694	554	277	281	72	100	100	0	0	0	0	0	0	0	0	0	0	0	0	0	0	0	0	0	0	0	1.166	1.102	1.151	1.135	1.362	1.047	0.848	0.000	0.000	0.000	0.000	0.000	0.000	0.000	0.000	0.000	0.000	0.000	0.000	0.000	0.000	120	542	2989	2979	0.221	Error	Error	1609	1380	0	0	1562	1417	0	0	0	0
2	9	17	""	"iYNL148C"	8150	17320	130	692	671	209	71	74	31	97	95	0	570	562	188	281	288	73	89	85	0	0	0	0	0	0	0	0	0	0	0	0	0	0	0	0	0	0	0	2.149	2.135	2.084	2.004	1.994	1.949	0.618	0.000	0.000	0.000	0.000	0.000	0.000	0.000	0.000	0.000	0.000	0.000	0.000	0.000	0.000	120	567	910	881	1.104	Error	Error	621	289	0	0	600	281	0	0	0	0
2	10	17	""	"iYNL144C-0"	8340	17320	130	2072	1954	773	74	77	29	100	99	0	1220	1168	425	284	290	75	95	94	0	0	0	0	0	0	0	0	0	0	0	0	0	0	0	0	0	0	0	2.135	2.127	2.236	2.153	1.407	2.159	0.809	0.000	0.000	0.000	0.000	0.000	0.000	0.000	0.000	0.000	0.000	0.000	0.000	0.000	0.000	120	516	2934	2764	1.094	Error	Error	1998	936	0	0	1880	884	0	0	0	0
2	11	17	""	"iYNL141W"	8540	17320	140	906	829	318	73	78	48	98	96	0	2986	2771	1027	282	311	289	94	92	0	0	0	0	0	0	0	0	0	0	0	0	0	0	0	0	0	0	0	0.308	0.304	0.309	0.309	1.556	0.293	0.888	0.000	0.000	0.000	0.000	0.000	0.000	0.000	0.000	0.000	0.000	0.000	0.000	0.000	0.000	156	567	3537	3245	-1.699	Error	Error	833	2704	0	0	756	2489	0	0	0	0
2	12	17	""	"iYNL125C"	8720	17320	140	1241	1241	532	69	72	30	100	99	0	813	800	272	280	283	76	92	91	0	0	0	0	0	0	0	0	0	0	0	0	0	0	0	0	0	0	0	2.199	2.254	2.239	2.352	1.570	2.247	0.778	0.000	0.000	0.000	0.000	0.000	0.000	0.000	0.000	0.000	0.000	0.000	0.000	0.000	0.000	156	545	1705	1692	1.137	Error	Error	1172	533	0	0	1172	520	0	0	0	0
2	13	17	""	"iYNL121C"	8910	17320	140	1130	1134	454	74	84	80	100	98	0	791	784	261	286	301	133	90	82	0	0	0	0	0	0	0	0	0	0	0	0	0	0	0	0	0	0	0	2.091	2.129	2.158	2.230	1.606	2.102	0.775	0.000	0.000	0.000	0.000	0.000	0.000	0.000	0.000	0.000	0.000	0.000	0.000	0.000	0.000	156	566	1561	1558	1.064	Error	Error	1056	505	0	0	1060	498	0	0	0	0
2	14	17	""	"iYNL116W"	9110	17320	140	662	626	232	74	78	41	98	96	0	2078	1904	676	281	293	108	97	94	0	0	0	0	0	0	0	0	0	0	0	0	0	0	0	0	0	0	0	0.327	0.340	0.338	0.346	1.623	0.329	0.861	0.000	0.000	0.000	0.000	0.000	0.000	0.000	0.000	0.000	0.000	0.000	0.000	0.000	0.000	156	512	2385	2175	-1.612	Error	Error	588	1797	0	0	552	1623	0	0	0	0
2	15	17	""	"iYNL097C"	9290	17320	140	1710	1802	751	75	83	52	100	99	0	1169	1169	402	286	300	114	96	92	0	0	0	0	0	0	0	0	0	0	0	0	0	0	0	0	0	0	0	1.852	1.956	1.899	1.950	1.440	2.026	0.808	0.000	0.000	0.000	0.000	0.000	0.000	0.000	0.000	0.000	0.000	0.000	0.000	0.000	0.000	156	522	2518	2610	0.889	Error	Error	1635	883	0	0	1727	883	0	0	0	0
2	16	17	""	"iYNL094W"	9490	17320	140	1197	1293	707	79	88	47	98	97	0	774	785	327	291	306	103	90	79	0	0	0	0	0	0	0	0	0	0	0	0	0	0	0	0	0	0	0	2.315	2.457	2.418	2.581	1.672	2.515	0.765	0.000	0.000	0.000	0.000	0.000	0.000	0.000	0.000	0.000	0.000	0.000	0.000	0.000	0.000	156	524	1601	1708	1.211	Error	Error	1118	483	0	0	1214	494	0	0	0	0
2	17	17	""	"iYNL089C"	9670	17320	140	795	875	442	82	89	43	98	95	0	638	624	211	291	298	87	86	78	0	0	0	0	0	0	0	0	0	0	0	0	0	0	0	0	0	0	0	2.055	2.381	2.335	2.436	2.059	2.469	0.672	0.000	0.000	0.000	0.000	0.000	0.000	0.000	0.000	0.000	0.000	0.000	0.000	0.000	0.000	156	510	1060	1126	1.039	Error	Error	713	347	0	0	793	333	0	0	0	0
2	18	17	""	"iYNL073W"	9870	17330	130	679	665	250	82	90	41	97	97	0	735	728	237	294	305	90	93	90	0	0	0	0	0	0	0	0	0	0	0	0	0	0	0	0	0	0	0	1.354	1.343	1.332	1.245	1.774	1.220	0.686	0.000	0.000	0.000	0.000	0.000	0.000	0.000	0.000	0.000	0.000	0.000	0.000	0.000	0.000	120	516	1038	1017	0.437	Error	Error	597	441	0	0	583	434	0	0	0	0
2	19	17	""	"iYNL069C"	10050	17330	130	1439	1416	701	83	89	36	100	98	0	911	910	363	296	311	96	93	88	0	0	0	0	0	0	0	0	0	0	0	0	0	0	0	0	0	0	0	2.205	2.171	2.153	2.145	1.512	2.178	0.802	0.000	0.000	0.000	0.000	0.000	0.000	0.000	0.000	0.000	0.000	0.000	0.000	0.000	0.000	120	500	1971	1947	1.141	Error	Error	1356	615	0	0	1333	614	0	0	0	0
2	20	17	""	"iYNL065W"	10240	17320	130	924	885	289	81	87	37	99	96	0	3537	3441	986	299	320	159	99	97	0	0	0	0	0	0	0	0	0	0	0	0	0	0	0	0	0	0	0	0.260	0.256	0.253	0.250	1.359	0.240	0.894	0.000	0.000	0.000	0.000	0.000	0.000	0.000	0.000	0.000	0.000	0.000	0.000	0.000	0.000	120	511	4081	3946	-1.941	Error	Error	843	3238	0	0	804	3142	0	0	0	0
2	21	17	""	"itG(GCC)O2"	10430	17330	130	556	551	212	79	85	38	97	95	0	880	867	302	292	359	1019	5	0	0	0	0	0	0	0	0	0	0	0	0	0	0	0	0	0	0	0	0	0.811	0.821	0.787	0.859	1.863	0.670	0.663	0.000	0.000	0.000	0.000	0.000	0.000	0.000	0.000	0.000	0.000	0.000	0.000	0.000	0.000	120	511	1065	1047	-0.302	Error	Error	477	588	0	0	472	575	0	0	0	0
2	22	17	""	"iYOL019W"	10610	17320	130	1668	1599	519	80	87	43	99	99	0	4006	3779	1345	281	334	906	91	88	0	0	0	0	0	0	0	0	0	0	0	0	0	0	0	0	0	0	0	0.426	0.434	0.440	0.454	1.358	0.316	0.672	0.000	0.000	0.000	0.000	0.000	0.000	0.000	0.000	0.000	0.000	0.000	0.000	0.000	0.000	120	646	5313	5017	-1.230	Error	Error	1588	3725	0	0	1519	3498	0	0	0	0
2	1	18	""	"iYOL015W"	6630	17510	130	2178	2106	806	71	74	30	100	100	0	2699	2551	893	279	287	84	100	99	0	0	0	0	0	0	0	0	0	0	0	0	0	0	0	0	0	0	0	0.871	0.896	0.926	0.906	1.407	0.868	0.907	0.000	0.000	0.000	0.000	0.000	0.000	0.000	0.000	0.000	0.000	0.000	0.000	0.000	0.000	120	658	4527	4307	-0.200	Error	Error	2107	2420	0	0	2035	2272	0	0	0	0
2	2	18	""	"iYOL001W"	6830	17510	130	235	238	91	70	73	28	95	86	0	1690	1616	656	284	290	85	95	93	0	0	0	0	0	0	0	0	0	0	0	0	0	0	0	0	0	0	0	0.117	0.126	0.116	0.125	1.786	0.111	0.728	0.000	0.000	0.000	0.000	0.000	0.000	0.000	0.000	0.000	0.000	0.000	0.000	0.000	0.000	120	490	1571	1500	-3.091	Error	Error	165	1406	0	0	168	1332	0	0	0	0
2	3	18	""	"iYOR003W"	7020	17510	140	1353	1370	645	70	72	26	100	100	0	8880	8737	4148	281	290	84	99	99	0	0	0	0	0	0	0	0	0	0	0	0	0	0	0	0	0	0	0	0.149	0.154	0.149	0.154	1.474	0.145	0.894	0.000	0.000	0.000	0.000	0.000	0.000	0.000	0.000	0.000	0.000	0.000	0.000	0.000	0.000	156	489	9882	9756	-2.745	Error	Error	1283	8599	0	0	1300	8456	0	0	0	0
2	4	18	""	"iYOR007C"	7200	17510	130	844	828	317	71	78	48	97	97	0	1150	1127	416	279	298	128	94	90	0	0	0	0	0	0	0	0	0	0	0	0	0	0	0	0	0	0	0	0.887	0.893	0.916	0.912	1.447	0.809	0.825	0.000	0.000	0.000	0.000	0.000	0.000	0.000	0.000	0.000	0.000	0.000	0.000	0.000	0.000	120	486	1644	1605	-0.172	Error	Error	773	871	0	0	757	848	0	0	0	0
2	5	18	""	"iYOR018W"	7390	17510	120	1544	1571	757	71	79	49	100	100	0	5236	5205	2579	285	306	134	97	96	0	0	0	0	0	0	0	0	0	0	0	0	0	0	0	0	0	0	0	0.298	0.305	0.314	0.327	1.614	0.284	0.896	0.000	0.000	0.000	0.000	0.000	0.000	0.000	0.000	0.000	0.000	0.000	0.000	0.000	0.000	120	507	6424	6420	-1.749	Error	Error	1473	4951	0	0	1500	4920	0	0	0	0
2	6	18	""	"iYOR021C"	7590	17520	130	1076	989	384	71	76	35	98	97	0	1312	1254	481	282	297	101	93	90	0	0	0	0	0	0	0	0	0	0	0	0	0	0	0	0	0	0	0	0.976	0.944	0.931	1.007	1.640	0.886	0.845	0.000	0.000	0.000	0.000	0.000	0.000	0.000	0.000	0.000	0.000	0.000	0.000	0.000	0.000	120	531	2035	1890	-0.035	Error	Error	1005	1030	0	0	918	972	0	0	0	0
2	7	18	""	"iYOR026W"	7770	17510	130	1210	1123	385	71	79	44	99	97	0	824	797	253	281	287	82	93	89	0	0	0	0	0	0	0	0	0	0	0	0	0	0	0	0	0	0	0	2.098	2.039	1.990	2.070	1.413	1.933	0.841	0.000	0.000	0.000	0.000	0.000	0.000	0.000	0.000	0.000	0.000	0.000	0.000	0.000	0.000	120	531	1682	1568	1.069	Error	Error	1139	543	0	0	1052	516	0	0	0	0
2	8	18	""	"iYOR042W"	7960	17510	130	378	363	125	71	80	45	95	92	0	468	461	160	286	288	78	76	59	0	0	0	0	0	0	0	0	0	0	0	0	0	0	0	0	0	0	0	1.687	1.669	1.529	1.561	2.283	1.143	0.475	0.000	0.000	0.000	0.000	0.000	0.000	0.000	0.000	0.000	0.000	0.000	0.000	0.000	0.000	120	563	489	467	0.754	Error	Error	307	182	0	0	292	175	0	0	0	0
2	9	18	""	"iYOR045W"	8160	17510	130	777	742	320	74	78	34	99	96	0	5254	4873	2201	289	295	85	98	98	0	0	0	0	0	0	0	0	0	0	0	0	0	0	0	0	0	0	0	0.142	0.146	0.143	0.152	1.438	0.139	0.918	0.000	0.000	0.000	0.000	0.000	0.000	0.000	0.000	0.000	0.000	0.000	0.000	0.000	0.000	120	542	5668	5252	-2.820	Error	Error	703	4965	0	0	668	4584	0	0	0	0
2	10	18	""	"iYOR049C"	8350	17510	140	1514	1381	645	74	76	29	100	98	0	1384	1300	562	282	290	86	91	87	0	0	0	0	0	0	0	0	0	0	0	0	0	0	0	0	0	0	0	1.307	1.284	1.250	1.308	1.664	1.262	0.880	0.000	0.000	0.000	0.000	0.000	0.000	0.000	0.000	0.000	0.000	0.000	0.000	0.000	0.000	156	571	2542	2325	0.386	Error	Error	1440	1102	0	0	1307	1018	0	0	0	0
2	11	18	""	"iYOR356W"	8540	17520	120	154	156	63	70	71	25	82	75	0	422	426	145	271	276	74	70	50	0	0	0	0	0	0	0	0	0	0	0	0	0	0	0	0	0	0	0	0.556	0.555	0.551	0.598	2.872	0.315	0.341	0.000	0.000	0.000	0.000	0.000	0.000	0.000	0.000	0.000	0.000	0.000	0.000	0.000	0.000	120	475	235	241	-0.846	Error	Error	84	151	0	0	86	155	0	0	0	0
2	12	18	""	"iYOR360C"	8740	17520	130	886	960	484	71	77	59	97	94	0	849	865	370	285	286	80	91	89	0	0	0	0	0	0	0	0	0	0	0	0	0	0	0	0	0	0	0	1.445	1.533	1.553	1.570	1.584	1.464	0.808	0.000	0.000	0.000	0.000	0.000	0.000	0.000	0.000	0.000	0.000	0.000	0.000	0.000	0.000	120	514	1379	1469	0.531	Error	Error	815	564	0	0	889	580	0	0	0	0
2	13	18	""	"iYOR366W"	8920	17520	130	888	884	347	77	82	39	100	98	0	1218	1204	442	289	296	88	95	94	0	0	0	0	0	0	0	0	0	0	0	0	0	0	0	0	0	0	0	0.873	0.882	0.902	0.919	1.546	0.816	0.810	0.000	0.000	0.000	0.000	0.000	0.000	0.000	0.000	0.000	0.000	0.000	0.000	0.000	0.000	120	499	1740	1722	-0.196	Error	Error	811	929	0	0	807	915	0	0	0	0
2	14	18	""	"iYOR380W-1"	9100	17510	130	1995	2034	950	79	89	74	100	99	0	1463	1515	612	288	310	143	96	92	0	0	0	0	0	0	0	0	0	0	0	0	0	0	0	0	0	0	0	1.631	1.593	1.592	1.615	1.413	1.661	0.836	0.000	0.000	0.000	0.000	0.000	0.000	0.000	0.000	0.000	0.000	0.000	0.000	0.000	0.000	120	520	3091	3182	0.705	Error	Error	1916	1175	0	0	1955	1227	0	0	0	0
2	15	18	""	"iYOR383C"	9290	17510	130	1744	1707	654	81	98	86	100	99	0	1935	1895	673	300	335	189	96	94	0	0	0	0	0	0	0	0	0	0	0	0	0	0	0	0	0	0	0	1.017	1.019	1.029	1.053	1.572	0.995	0.866	0.000	0.000	0.000	0.000	0.000	0.000	0.000	0.000	0.000	0.000	0.000	0.000	0.000	0.000	120	549	3298	3221	0.024	Error	Error	1663	1635	0	0	1626	1595	0	0	0	0
2	16	18	""	"iYOR387C-0"	9490	17510	130	1235	1333	676	87	99	63	99	96	0	1466	1444	641	306	329	151	94	90	0	0	0	0	0	0	0	0	0	0	0	0	0	0	0	0	0	0	0	0.990	1.095	1.110	1.108	1.433	1.090	0.796	0.000	0.000	0.000	0.000	0.000	0.000	0.000	0.000	0.000	0.000	0.000	0.000	0.000	0.000	120	514	2308	2384	-0.015	Error	Error	1148	1160	0	0	1246	1138	0	0	0	0
2	17	18	""	"iYPL275W-2"	9670	17510	130	1759	1718	598	85	92	41	100	100	0	854	864	238	302	308	89	98	94	0	0	0	0	0	0	0	0	0	0	0	0	0	0	0	0	0	0	0	3.033	2.906	2.943	2.935	1.478	3.046	0.758	0.000	0.000	0.000	0.000	0.000	0.000	0.000	0.000	0.000	0.000	0.000	0.000	0.000	0.000	120	516	2226	2195	1.601	Error	Error	1674	552	0	0	1633	562	0	0	0	0
2	18	18	""	"iYPL272C-1"	9870	17520	130	1516	1536	712	84	92	41	100	98	0	668	683	243	302	315	101	89	81	0	0	0	0	0	0	0	0	0	0	0	0	0	0	0	0	0	0	0	3.913	3.811	4.090	3.894	1.689	3.798	0.698	0.000	0.000	0.000	0.000	0.000	0.000	0.000	0.000	0.000	0.000	0.000	0.000	0.000	0.000	120	560	1798	1833	1.968	Error	Error	1432	366	0	0	1452	381	0	0	0	0
2	19	18	""	"iYPL268W"	10060	17510	130	937	873	282	84	92	40	100	100	0	745	756	190	300	312	92	97	93	0	0	0	0	0	0	0	0	0	0	0	0	0	0	0	0	0	0	0	1.917	1.730	1.825	1.744	1.728	1.733	0.697	0.000	0.000	0.000	0.000	0.000	0.000	0.000	0.000	0.000	0.000	0.000	0.000	0.000	0.000	120	529	1298	1245	0.939	Error	Error	853	445	0	0	789	456	0	0	0	0
2	20	18	""	"iYPL253C"	10240	17510	130	890	883	332	86	95	50	97	96	0	3654	3540	1345	305	334	151	95	95	0	0	0	0	0	0	0	0	0	0	0	0	0	0	0	0	0	0	0	0.240	0.246	0.245	0.253	1.585	0.229	0.885	0.000	0.000	0.000	0.000	0.000	0.000	0.000	0.000	0.000	0.000	0.000	0.000	0.000	0.000	120	522	4153	4032	-2.058	Error	Error	804	3349	0	0	797	3235	0	0	0	0
2	21	18	""	"iYPL249C"	10430	17510	130	1882	1961	920	98	105	47	100	100	0	1211	1233	497	317	384	992	39	1	0	0	0	0	0	0	0	0	0	0	0	0	0	0	0	0	0	0	0	1.996	2.034	1.905	2.026	1.629	2.031	0.823	0.000	0.000	0.000	0.000	0.000	0.000	0.000	0.000	0.000	0.000	0.000	0.000	0.000	0.000	120	537	2678	2779	0.997	Error	Error	1784	894	0	0	1863	916	0	0	0	0
2	22	18	""	"iYPL245W"	10620	17520	120	348	350	120	95	103	49	94	91	0	661	647	299	300	346	913	0	0	0	0	0	0	0	0	0	0	0	0	0	0	0	0	0	0	0	0	0	0.701	0.735	0.737	0.769	1.931	0.488	0.578	0.000	0.000	0.000	0.000	0.000	0.000	0.000	0.000	0.000	0.000	0.000	0.000	0.000	0.000	120	631	614	602	-0.513	Error	Error	253	361	0	0	255	347	0	0	0	0
2	1	19	""	"iYPR067W"	6650	17700	140	506	482	180	71	74	29	98	95	0	1437	1415	476	280	290	79	98	94	0	0	0	0	0	0	0	0	0	0	0	0	0	0	0	0	0	0	0	0.376	0.362	0.367	0.359	1.601	0.348	0.845	0.000	0.000	0.000	0.000	0.000	0.000	0.000	0.000	0.000	0.000	0.000	0.000	0.000	0.000	156	672	1592	1546	-1.411	Error	Error	435	1157	0	0	411	1135	0	0	0	0
2	2	19	""	"iYPR071W"	6830	17700	140	1873	1743	700	70	73	27	100	99	0	1568	1474	561	288	295	81	93	91	0	0	0	0	0	0	0	0	0	0	0	0	0	0	0	0	0	0	0	1.409	1.411	1.420	1.491	1.549	1.392	0.870	0.000	0.000	0.000	0.000	0.000	0.000	0.000	0.000	0.000	0.000	0.000	0.000	0.000	0.000	156	487	3083	2859	0.494	Error	Error	1803	1280	0	0	1673	1186	0	0	0	0
2	3	19	""	"iYPR074C"	7030	17700	140	1632	1577	618	69	72	27	100	100	0	913	880	301	280	289	85	91	90	0	0	0	0	0	0	0	0	0	0	0	0	0	0	0	0	0	0	0	2.469	2.513	2.466	2.712	1.873	2.618	0.778	0.000	0.000	0.000	0.000	0.000	0.000	0.000	0.000	0.000	0.000	0.000	0.000	0.000	0.000	156	426	2196	2108	1.304	Error	Error	1563	633	0	0	1508	600	0	0	0	0
2	4	19	""	"iYPR094W"	7210	17700	140	416	397	131	68	75	46	96	92	0	692	702	166	274	295	126	96	85	0	0	0	0	0	0	0	0	0	0	0	0	0	0	0	0	0	0	0	0.833	0.769	0.785	0.729	1.868	0.694	0.691	0.000	0.000	0.000	0.000	0.000	0.000	0.000	0.000	0.000	0.000	0.000	0.000	0.000	0.000	156	437	766	757	-0.264	Error	Error	348	418	0	0	329	428	0	0	0	0
2	5	19	""	"iYPR098C"	7390	17700	130	1242	1173	408	69	75	35	100	99	0	1542	1495	527	284	303	110	94	92	0	0	0	0	0	0	0	0	0	0	0	0	0	0	0	0	0	0	0	0.932	0.912	0.952	0.968	1.523	0.865	0.871	0.000	0.000	0.000	0.000	0.000	0.000	0.000	0.000	0.000	0.000	0.000	0.000	0.000	0.000	120	482	2431	2315	-0.101	Error	Error	1173	1258	0	0	1104	1211	0	0	0	0
2	6	19	""	"iYPR103W"	7580	17700	130	1154	1113	427	72	79	40	99	98	0	3858	3673	1437	284	314	146	97	96	0	0	0	0	0	0	0	0	0	0	0	0	0	0	0	0	0	0	0	0.303	0.307	0.301	0.319	1.411	0.283	0.910	0.000	0.000	0.000	0.000	0.000	0.000	0.000	0.000	0.000	0.000	0.000	0.000	0.000	0.000	120	521	4656	4430	-1.724	Error	Error	1082	3574	0	0	1041	3389	0	0	0	0
2	7	19	""	"iYPRWsigma2-0"	7780	17700	130	2519	2360	794	72	81	47	99	99	0	3183	3068	1022	286	305	135	97	97	0	0	0	0	0	0	0	0	0	0	0	0	0	0	0	0	0	0	0	0.845	0.822	0.827	0.841	1.324	0.815	0.930	0.000	0.000	0.000	0.000	0.000	0.000	0.000	0.000	0.000	0.000	0.000	0.000	0.000	0.000	120	528	5344	5070	-0.244	Error	Error	2447	2897	0	0	2288	2782	0	0	0	0
2	8	19	""	"itC(GCA)P2"	7970	17700	130	660	663	252	70	77	38	96	95	0	944	935	325	288	291	81	93	91	0	0	0	0	0	0	0	0	0	0	0	0	0	0	0	0	0	0	0	0.899	0.917	0.892	0.884	1.723	0.843	0.776	0.000	0.000	0.000	0.000	0.000	0.000	0.000	0.000	0.000	0.000	0.000	0.000	0.000	0.000	120	518	1246	1240	-0.153	Error	Error	590	656	0	0	593	647	0	0	0	0
2	9	19	""	"iYPR121W-0"	8160	17700	130	1831	1862	847	73	76	33	100	100	0	1591	1666	734	284	292	95	93	91	0	0	0	0	0	0	0	0	0	0	0	0	0	0	0	0	0	0	0	1.345	1.295	1.252	1.349	1.720	1.247	0.876	0.000	0.000	0.000	0.000	0.000	0.000	0.000	0.000	0.000	0.000	0.000	0.000	0.000	0.000	120	514	3065	3171	0.428	Error	Error	1758	1307	0	0	1789	1382	0	0	0	0
2	10	19	""	"itN(GUU)P"	8350	17710	130	430	425	188	71	75	33	94	92	0	604	594	216	279	283	89	87	78	0	0	0	0	0	0	0	0	0	0	0	0	0	0	0	0	0	0	0	1.105	1.124	1.051	1.040	1.982	0.934	0.628	0.000	0.000	0.000	0.000	0.000	0.000	0.000	0.000	0.000	0.000	0.000	0.000	0.000	0.000	120	487	684	669	0.144	Error	Error	359	325	0	0	354	315	0	0	0	0
2	11	19	""	"iYPR141C"	8540	17700	130	425	425	157	72	75	31	97	95	0	632	625	170	275	280	74	92	86	0	0	0	0	0	0	0	0	0	0	0	0	0	0	0	0	0	0	0	0.989	1.009	1.000	0.995	1.860	0.915	0.636	0.000	0.000	0.000	0.000	0.000	0.000	0.000	0.000	0.000	0.000	0.000	0.000	0.000	0.000	120	482	710	703	-0.016	Error	Error	353	357	0	0	353	350	0	0	0	0
2	12	19	""	"iSNR45"	8720	17700	130	1375	1365	598	76	93	93	98	93	0	798	805	322	292	303	106	91	84	0	0	0	0	0	0	0	0	0	0	0	0	0	0	0	0	0	0	0	2.567	2.513	2.533	2.614	1.655	2.418	0.733	0.000	0.000	0.000	0.000	0.000	0.000	0.000	0.000	0.000	0.000	0.000	0.000	0.000	0.000	120	497	1805	1802	1.360	Error	Error	1299	506	0	0	1289	513	0	0	0	0
2	13	19	""	"iYAL064C-A-3"	8920	17700	130	7205	7283	3632	85	112	131	100	100	0	8594	8084	3642	301	340	205	100	99	0	0	0	0	0	0	0	0	0	0	0	0	0	0	0	0	0	0	0	0.859	0.925	0.900	0.918	1.357	0.919	0.912	0.000	0.000	0.000	0.000	0.000	0.000	0.000	0.000	0.000	0.000	0.000	0.000	0.000	0.000	120	522	15413	14981	-0.220	Error	Error	7120	8293	0	0	7198	7783	0	0	0	0
2	14	19	""	"iYBLWdelta3"	9120	17710	130	439	425	167	86	107	117	86	75	0	1075	1046	349	306	343	212	91	86	0	0	0	0	0	0	0	0	0	0	0	0	0	0	0	0	0	0	0	0.459	0.458	0.441	0.419	1.604	0.418	0.711	0.000	0.000	0.000	0.000	0.000	0.000	0.000	0.000	0.000	0.000	0.000	0.000	0.000	0.000	120	533	1122	1079	-1.123	Error	Error	353	769	0	0	339	740	0	0	0	0
2	15	19	""	"YBLCdelta7"	9320	17710	130	468	458	200	85	93	48	95	92	0	1390	1429	518	306	322	124	98	96	0	0	0	0	0	0	0	0	0	0	0	0	0	0	0	0	0	0	0	0.353	0.332	0.316	0.321	1.696	0.302	0.768	0.000	0.000	0.000	0.000	0.000	0.000	0.000	0.000	0.000	0.000	0.000	0.000	0.000	0.000	120	480	1467	1496	-1.501	Error	Error	383	1084	0	0	373	1123	0	0	0	0
2	16	19	""	"itE(UUC)C"	9490	17700	130	301	315	133	83	87	35	94	90	0	649	663	222	301	307	88	90	82	0	0	0	0	0	0	0	0	0	0	0	0	0	0	0	0	0	0	0	0.626	0.641	0.656	0.605	2.037	0.522	0.603	0.000	0.000	0.000	0.000	0.000	0.000	0.000	0.000	0.000	0.000	0.000	0.000	0.000	0.000	120	483	566	594	-0.675	Error	Error	218	348	0	0	232	362	0	0	0	0
2	17	19	""	"itL(CAA)C"	9680	17700	130	1448	1378	563	81	89	46	99	97	0	2467	2377	834	301	313	107	97	95	0	0	0	0	0	0	0	0	0	0	0	0	0	0	0	0	0	0	0	0.631	0.625	0.639	0.621	1.550	0.597	0.877	0.000	0.000	0.000	0.000	0.000	0.000	0.000	0.000	0.000	0.000	0.000	0.000	0.000	0.000	120	516	3533	3373	-0.664	Error	Error	1367	2166	0	0	1297	2076	0	0	0	0
2	18	19	""	"iYCL014W"	9870	17710	130	393	402	149	83	91	48	95	92	0	1700	1622	476	304	333	152	99	96	0	0	0	0	0	0	0	0	0	0	0	0	0	0	0	0	0	0	0	0.222	0.242	0.236	0.229	1.521	0.228	0.771	0.000	0.000	0.000	0.000	0.000	0.000	0.000	0.000	0.000	0.000	0.000	0.000	0.000	0.000	120	504	1706	1637	-2.171	Error	Error	310	1396	0	0	319	1318	0	0	0	0
2	19	19	""	"iYCR002C"	10070	17710	130	865	802	272	83	91	44	100	99	0	2503	2407	771	308	329	140	99	99	0	0	0	0	0	0	0	0	0	0	0	0	0	0	0	0	0	0	0	0.356	0.343	0.343	0.339	1.373	0.322	0.874	0.000	0.000	0.000	0.000	0.000	0.000	0.000	0.000	0.000	0.000	0.000	0.000	0.000	0.000	120	495	2977	2818	-1.489	Error	Error	782	2195	0	0	719	2099	0	0	0	0
2	20	19	""	"iYCR006C"	10260	17710	140	917	886	372	93	102	52	98	96	0	1085	1061	389	320	337	130	88	87	0	0	0	0	0	0	0	0	0	0	0	0	0	0	0	0	0	0	0	1.077	1.070	1.059	1.097	1.539	1.006	0.793	0.000	0.000	0.000	0.000	0.000	0.000	0.000	0.000	0.000	0.000	0.000	0.000	0.000	0.000	156	485	1589	1534	0.107	Error	Error	824	765	0	0	793	741	0	0	0	0
2	21	19	""	"iYCRCdelta6-A"	10440	17710	130	1792	1736	759	103	116	74	100	98	0	2307	2152	877	325	337	124	96	95	0	0	0	0	0	0	0	0	0	0	0	0	0	0	0	0	0	0	0	0.852	0.894	0.907	0.887	1.412	0.871	0.869	0.000	0.000	0.000	0.000	0.000	0.000	0.000	0.000	0.000	0.000	0.000	0.000	0.000	0.000	120	515	3671	3460	-0.231	Error	Error	1689	1982	0	0	1633	1827	0	0	0	0
2	22	19	""	"YCRCtau1"	10640	17710	90	148	153	59	97	109	84	25	3	0	512	516	166	300	322	136	71	32	0	0	0	0	0	0	0	0	0	0	0	0	0	0	0	0	0	0	0	0.241	0.259	0.284	0.268	2.135	0.190	0.257	0.000	0.000	0.000	0.000	0.000	0.000	0.000	0.000	0.000	0.000	0.000	0.000	0.000	0.000	52	359	263	272	-2.055	Error	Error	51	212	0	0	56	216	0	0	0	0
2	1	20	""	"SNR189"	6640	17890	120	296	302	146	71	75	30	93	86	0	544	530	190	284	291	77	84	75	0	0	0	0	0	0	0	0	0	0	0	0	0	0	0	0	0	0	0	0.865	0.939	0.931	0.833	2.017	0.759	0.608	0.000	0.000	0.000	0.000	0.000	0.000	0.000	0.000	0.000	0.000	0.000	0.000	0.000	0.000	120	656	485	477	-0.209	Error	Error	225	260	0	0	231	246	0	0	0	0
2	2	20	""	"YCRWomega3"	6840	17890	130	1042	1040	443	72	74	28	98	97	0	1930	1907	724	294	299	82	96	95	0	0	0	0	0	0	0	0	0	0	0	0	0	0	0	0	0	0	0	0.593	0.600	0.610	0.607	1.381	0.574	0.849	0.000	0.000	0.000	0.000	0.000	0.000	0.000	0.000	0.000	0.000	0.000	0.000	0.000	0.000	120	578	2606	2581	-0.754	Error	Error	970	1636	0	0	968	1613	0	0	0	0
2	3	20	"EMPTY"	"EMPTY"	7010	17890	150	69	69	24	70	73	28	14	1	0	276	284	75	292	298	79	16	0	0	0	0	0	0	0	0	0	0	0	0	0	0	0	0	0	0	0	0	0.063	0.125	0.292	0.334	4.201	0.021	0.003	0.000	0.000	0.000	0.000	0.000	0.000	0.000	0.000	0.000	0.000	0.000	0.000	0.000	0.000	156	675	-17	-9	-4.000	Error	Error	-1	-16	0	0	-1	-8	0	0	-75	0
2	4	20	"EMPTY"	"EMPTY"	7200	17890	150	81	82	30	76	80	32	17	4	0	293	299	87	291	300	79	21	5	0	0	0	0	0	0	0	0	0	0	0	0	0	0	0	0	0	0	0	2.500	0.750	0.325	0.337	4.111	0.047	0.011	0.000	0.000	0.000	0.000	0.000	0.000	0.000	0.000	0.000	0.000	0.000	0.000	0.000	0.000	156	670	7	14	1.322	Error	Error	5	2	0	0	6	8	0	0	-75	0
2	5	20	"EMPTY"	"EMPTY"	7390	17890	150	66	68	23	73	78	33	6	0	0	291	299	73	283	298	91	14	3	0	0	0	0	0	0	0	0	0	0	0	0	0	0	0	0	0	0	0	-0.875	-0.312	0.417	0.408	3.524	0.040	0.010	0.000	0.000	0.000	0.000	0.000	0.000	0.000	0.000	0.000	0.000	0.000	0.000	0.000	0.000	156	706	1	11	Error	Error	Error	-7	8	0	0	-5	16	0	0	-75	0
2	6	20	"EMPTY"	"EMPTY"	7580	17890	150	65	67	21	69	73	34	6	0	0	282	290	76	280	297	121	10	0	0	0	0	0	0	0	0	0	0	0	0	0	0	0	0	0	0	0	0	-2.000	-0.200	0.286	0.356	4.122	0.026	0.006	0.000	0.000	0.000	0.000	0.000	0.000	0.000	0.000	0.000	0.000	0.000	0.000	0.000	0.000	156	736	-2	8	Error	Error	Error	-4	2	0	0	-2	10	0	0	-75	0
2	7	20	"EMPTY"	"EMPTY"	7770	17890	150	70	72	25	70	74	34	9	1	0	286	285	73	282	296	112	5	0	0	0	0	0	0	0	0	0	0	0	0	0	0	0	0	0	0	0	0	0.000	0.667	0.348	0.414	4.792	0.039	0.008	0.000	0.000	0.000	0.000	0.000	0.000	0.000	0.000	0.000	0.000	0.000	0.000	0.000	0.000	156	737	4	5	Error	Error	Error	0	4	0	0	2	3	0	0	-75	0
2	8	20	"EMPTY"	"EMPTY"	7960	17890	150	66	68	25	73	75	31	8	0	0	279	283	74	282	290	78	16	3	0	0	0	0	0	0	0	0	0	0	0	0	0	0	0	0	0	0	0	2.333	-5.000	0.500	0.459	3.945	0.051	0.016	0.000	0.000	0.000	0.000	0.000	0.000	0.000	0.000	0.000	0.000	0.000	0.000	0.000	0.000	156	729	-10	-4	1.222	Error	Error	-7	-3	0	0	-5	1	0	0	-75	0
2	9	20	"EMPTY"	"EMPTY"	8150	17890	150	63	66	25	70	73	31	8	3	0	275	275	72	275	282	84	10	1	0	0	0	0	0	0	0	0	0	0	0	0	0	0	0	0	0	0	0	100000.000	100000.000	0.385	0.377	4.082	0.024	0.003	0.000	0.000	0.000	0.000	0.000	0.000	0.000	0.000	0.000	0.000	0.000	0.000	0.000	0.000	156	722	-7	-4	16.610	Error	Error	-7	0	0	0	-4	0	0	0	-75	0
2	10	20	"EMPTY"	"EMPTY"	8340	17890	150	67	69	23	72	76	41	4	0	0	280	282	76	279	284	88	11	2	0	0	0	0	0	0	0	0	0	0	0	0	0	0	0	0	0	0	0	-5.000	-1.000	0.308	0.301	4.511	139.922	0.000	0.000	0.000	0.000	0.000	0.000	0.000	0.000	0.000	0.000	0.000	0.000	0.000	0.000	0.000	156	713	-4	0	Error	Error	Error	-5	1	0	0	-3	3	0	0	-75	0
2	11	20	"EMPTY"	"EMPTY"	8530	17890	150	68	73	29	77	81	32	10	1	0	281	282	78	288	294	79	13	1	0	0	0	0	0	0	0	0	0	0	0	0	0	0	0	0	0	0	0	1.286	0.667	0.364	0.404	4.153	0.008	0.000	0.000	0.000	0.000	0.000	0.000	0.000	0.000	0.000	0.000	0.000	0.000	0.000	0.000	0.000	156	712	-16	-10	0.363	Error	Error	-9	-7	0	0	-4	-6	0	0	-75	0
2	12	20	"EMPTY"	"EMPTY"	8720	17890	150	77	80	30	77	89	79	1	0	0	282	290	70	293	303	99	7	0	0	0	0	0	0	0	0	0	0	0	0	0	0	0	0	0	0	0	0	0.000	-1.000	0.419	0.446	4.322	0.115	0.045	0.000	0.000	0.000	0.000	0.000	0.000	0.000	0.000	0.000	0.000	0.000	0.000	0.000	0.000	156	728	-11	0	Error	Error	Error	0	-11	0	0	3	-3	0	0	-75	0
2	13	20	"EMPTY"	"EMPTY"	8910	17890	150	81	87	33	83	101	103	0	0	0	299	303	82	298	321	171	1	0	0	0	0	0	0	0	0	0	0	0	0	0	0	0	0	0	0	0	0	-2.000	0.800	0.321	0.312	3.870	0.170	0.176	0.000	0.000	0.000	0.000	0.000	0.000	0.000	0.000	0.000	0.000	0.000	0.000	0.000	0.000	156	738	-1	9	Error	Error	Error	-2	1	0	0	4	5	0	0	-75	0
2	14	20	"EMPTY"	"EMPTY"	9100	17890	150	92	96	34	92	105	88	1	0	0	309	312	80	314	335	166	3	0	0	0	0	0	0	0	0	0	0	0	0	0	0	0	0	0	0	0	0	0.000	-2.000	0.349	0.361	3.815	0.071	0.020	0.000	0.000	0.000	0.000	0.000	0.000	0.000	0.000	0.000	0.000	0.000	0.000	0.000	0.000	156	722	-5	2	Error	Error	Error	0	-5	0	0	4	-2	0	0	-75	0
2	15	20	"EMPTY"	"EMPTY"	9290	17890	150	95	97	34	92	96	40	11	2	0	312	318	82	310	320	85	13	2	0	0	0	0	0	0	0	0	0	0	0	0	0	0	0	0	0	0	0	1.500	0.625	0.361	0.348	3.900	0.089	0.026	0.000	0.000	0.000	0.000	0.000	0.000	0.000	0.000	0.000	0.000	0.000	0.000	0.000	0.000	156	698	5	13	0.585	Error	Error	3	2	0	0	5	8	0	0	-75	0
2	16	20	"EMPTY"	"EMPTY"	9480	17890	150	85	89	33	91	94	37	11	3	0	315	315	87	305	316	86	15	4	0	0	0	0	0	0	0	0	0	0	0	0	0	0	0	0	0	0	0	-0.600	-0.200	0.339	0.335	4.182	0.048	0.011	0.000	0.000	0.000	0.000	0.000	0.000	0.000	0.000	0.000	0.000	0.000	0.000	0.000	0.000	156	700	4	8	Error	Error	Error	-6	10	0	0	-2	10	0	0	-75	0
2	17	20	"EMPTY"	"EMPTY"	9670	17890	150	82	86	36	91	99	44	7	1	0	300	307	77	309	324	101	8	1	0	0	0	0	0	0	0	0	0	0	0	0	0	0	0	0	0	0	0	1.000	2.500	0.471	0.534	3.598	0.106	0.048	0.000	0.000	0.000	0.000	0.000	0.000	0.000	0.000	0.000	0.000	0.000	0.000	0.000	0.000	156	722	-18	-7	0.000	Error	Error	-9	-9	0	0	-5	-2	0	0	-75	0
2	18	20	"EMPTY"	"EMPTY"	9860	17890	150	89	93	43	92	99	46	8	1	0	308	320	86	320	340	130	7	0	0	0	0	0	0	0	0	0	0	0	0	0	0	0	0	0	0	0	0	0.250	100000.000	0.484	0.389	3.767	0.116	0.038	0.000	0.000	0.000	0.000	0.000	0.000	0.000	0.000	0.000	0.000	0.000	0.000	0.000	0.000	156	714	-15	1	-2.000	Error	Error	-3	-12	0	0	1	0	0	0	-75	0
2	19	20	"EMPTY"	"EMPTY"	10050	17890	150	87	92	36	93	104	58	6	0	0	289	307	78	319	343	157	1	0	0	0	0	0	0	0	0	0	0	0	0	0	0	0	0	0	0	0	0	0.200	0.083	0.409	0.406	4.307	0.041	0.006	0.000	0.000	0.000	0.000	0.000	0.000	0.000	0.000	0.000	0.000	0.000	0.000	0.000	0.000	156	695	-36	-13	-2.322	Error	Error	-6	-30	0	0	-1	-12	0	0	-75	0
2	20	20	"EMPTY"	"EMPTY"	10240	17890	150	89	92	31	96	106	58	2	0	0	318	318	84	312	331	136	7	0	0	0	0	0	0	0	0	0	0	0	0	0	0	0	0	0	0	0	0	-1.167	-0.667	0.440	0.463	3.334	0.051	0.008	0.000	0.000	0.000	0.000	0.000	0.000	0.000	0.000	0.000	0.000	0.000	0.000	0.000	0.000	156	660	-1	2	Error	Error	Error	-7	6	0	0	-4	6	0	0	-75	0
2	21	20	"EMPTY"	"EMPTY"	10430	17890	150	90	97	39	99	108	67	6	0	0	307	320	90	317	330	116	8	0	0	0	0	0	0	0	0	0	0	0	0	0	0	0	0	0	0	0	0	0.900	-0.667	0.504	0.493	4.908	0.068	0.015	0.000	0.000	0.000	0.000	0.000	0.000	0.000	0.000	0.000	0.000	0.000	0.000	0.000	0.000	156	694	-19	1	-0.152	Error	Error	-9	-10	0	0	-2	3	0	0	-75	0
2	22	20	"EMPTY"	"EMPTY"	10620	17890	150	101	104	40	102	111	64	6	0	0	327	329	84	324	335	116	9	1	0	0	0	0	0	0	0	0	0	0	0	0	0	0	0	0	0	0	0	-0.333	0.400	0.649	0.740	4.301	0.055	0.011	0.000	0.000	0.000	0.000	0.000	0.000	0.000	0.000	0.000	0.000	0.000	0.000	0.000	0.000	156	952	2	7	Error	Error	Error	-1	3	0	0	2	5	0	0	-75	0
3	1	1	""	"YBL083C"	11090	14240	120	783	672	347	69	74	61	89	82	0	537	506	239	291	295	79	76	70	0	0	0	0	0	0	0	0	0	0	0	0	0	0	0	0	0	0	0	2.902	2.805	2.456	2.401	2.190	2.239	0.557	0.000	0.000	0.000	0.000	0.000	0.000	0.000	0.000	0.000	0.000	0.000	0.000	0.000	0.000	120	618	960	818	1.537	Error	Error	714	246	0	0	603	215	0	0	0	0
3	2	1	""	"YBL112C"	11280	14240	120	8148	7959	4783	70	74	28	100	100	0	3559	3424	2016	292	297	72	92	85	0	0	0	0	0	0	0	0	0	0	0	0	0	0	0	0	0	0	0	2.473	2.519	2.585	2.993	1.896	2.579	0.905	0.000	0.000	0.000	0.000	0.000	0.000	0.000	0.000	0.000	0.000	0.000	0.000	0.000	0.000	120	580	11345	11021	1.306	Error	Error	8078	3267	0	0	7889	3132	0	0	0	0
3	3	1	"CDS1"	"YBR029C"	11470	14240	120	371	376	228	73	76	29	85	85	0	448	427	203	288	293	71	72	55	0	0	0	0	0	0	0	0	0	0	0	0	0	0	0	0	0	0	0	1.862	2.180	1.594	1.586	2.301	1.486	0.455	0.000	0.000	0.000	0.000	0.000	0.000	0.000	0.000	0.000	0.000	0.000	0.000	0.000	0.000	120	578	458	442	0.897	Error	Error	298	160	0	0	303	139	0	0	0	0
3	4	1	"BOI1"	"YBL085W"	11670	14240	150	99	103	43	77	81	53	21	3	0	387	383	155	296	307	203	20	2	0	0	0	0	0	0	0	0	0	0	0	0	0	0	0	0	0	0	0	0.242	0.299	0.242	0.248	3.355	0.084	0.059	0.000	0.000	0.000	0.000	0.000	0.000	0.000	0.000	0.000	0.000	0.000	0.000	0.000	0.000	156	810	113	113	-2.048	Error	Error	22	91	0	0	26	87	0	0	-50	0
3	5	1	"NTH2"	"YBR001C"	11840	14230	110	1067	919	529	82	106	151	81	76	0	5150	4619	2872	307	465	888	77	75	0	0	0	0	0	0	0	0	0	0	0	0	0	0	0	0	0	0	0	0.203	0.194	0.198	0.226	2.071	0.180	0.816	0.000	0.000	0.000	0.000	0.000	0.000	0.000	0.000	0.000	0.000	0.000	0.000	0.000	0.000	80	484	5828	5149	-2.298	Error	Error	985	4843	0	0	837	4312	0	0	0	0
3	6	1	"RPL4A"	"YBR031W"	12030	14230	110	655	591	338	77	111	175	77	66	0	1235	1127	635	284	449	841	56	8	0	0	0	0	0	0	0	0	0	0	0	0	0	0	0	0	0	0	0	0.608	0.610	0.541	0.491	1.767	0.546	0.729	0.000	0.000	0.000	0.000	0.000	0.000	0.000	0.000	0.000	0.000	0.000	0.000	0.000	0.000	80	570	1529	1357	-0.718	Error	Error	578	951	0	0	514	843	0	0	0	0
3	7	1	"RPL23A"	"YBL087C"	12230	14230	110	765	698	405	70	91	114	81	72	0	892	747	419	282	324	214	72	63	0	0	0	0	0	0	0	0	0	0	0	0	0	0	0	0	0	0	0	1.139	1.351	1.146	0.986	2.315	1.128	0.756	0.000	0.000	0.000	0.000	0.000	0.000	0.000	0.000	0.000	0.000	0.000	0.000	0.000	0.000	80	558	1305	1093	0.188	Error	Error	695	610	0	0	628	465	0	0	0	0
3	8	1	"COQ1"	"YBR003W"	12410	14230	110	1573	1300	645	77	101	165	86	85	0	6186	5249	2767	298	444	932	81	77	0	0	0	0	0	0	0	0	0	0	0	0	0	0	0	0	0	0	0	0.254	0.247	0.262	0.281	1.789	0.236	0.863	0.000	0.000	0.000	0.000	0.000	0.000	0.000	0.000	0.000	0.000	0.000	0.000	0.000	0.000	80	544	7384	6174	-1.977	Error	Error	1496	5888	0	0	1223	4951	0	0	0	0
3	9	1	""	"YBR033W"	12620	14240	120	714	692	353	72	93	147	85	80	0	1689	1624	880	292	411	862	75	29	0	0	0	0	0	0	0	0	0	0	0	0	0	0	0	0	0	0	0	0.460	0.465	0.422	0.463	1.709	0.411	0.770	0.000	0.000	0.000	0.000	0.000	0.000	0.000	0.000	0.000	0.000	0.000	0.000	0.000	0.000	120	637	2039	1952	-1.122	Error	Error	642	1397	0	0	620	1332	0	0	0	0
3	10	1	""	"YBL089W"	12800	14240	120	698	635	274	65	73	59	91	89	0	1832	1726	771	279	304	221	85	85	0	0	0	0	0	0	0	0	0	0	0	0	0	0	0	0	0	0	0	0.408	0.394	0.376	0.383	1.881	0.357	0.782	0.000	0.000	0.000	0.000	0.000	0.000	0.000	0.000	0.000	0.000	0.000	0.000	0.000	0.000	120	549	2186	2017	-1.295	Error	Error	633	1553	0	0	570	1447	0	0	0	0
3	11	1	""	"YBR005W"	12980	14240	120	563	516	277	69	77	61	84	79	0	2263	1968	1127	288	312	217	80	76	0	0	0	0	0	0	0	0	0	0	0	0	0	0	0	0	0	0	0	0.250	0.266	0.255	0.245	1.840	0.237	0.856	0.000	0.000	0.000	0.000	0.000	0.000	0.000	0.000	0.000	0.000	0.000	0.000	0.000	0.000	120	579	2469	2127	-1.999	Error	Error	494	1975	0	0	447	1680	0	0	0	0
3	12	1	"PDX3"	"YBR035C"	13170	14240	120	854	810	351	70	73	30	95	94	0	714	671	283	286	293	77	84	80	0	0	0	0	0	0	0	0	0	0	0	0	0	0	0	0	0	0	0	1.832	1.922	1.807	1.719	1.985	1.741	0.676	0.000	0.000	0.000	0.000	0.000	0.000	0.000	0.000	0.000	0.000	0.000	0.000	0.000	0.000	120	578	1212	1125	0.873	Error	Error	784	428	0	0	740	385	0	0	0	0
3	13	1	""	"YCL047C"	13350	14230	120	778	710	316	69	70	25	99	95	0	1325	1197	541	278	294	199	85	79	0	0	0	0	0	0	0	0	0	0	0	0	0	0	0	0	0	0	0	0.677	0.697	0.658	0.705	1.597	0.629	0.800	0.000	0.000	0.000	0.000	0.000	0.000	0.000	0.000	0.000	0.000	0.000	0.000	0.000	0.000	120	598	1756	1560	-0.562	Error	Error	709	1047	0	0	641	919	0	0	0	0
3	14	1	"RVS161"	"YCR009C"	13550	14230	120	787	726	304	68	70	24	96	95	0	4504	4028	1877	282	283	76	94	92	0	0	0	0	0	0	0	0	0	0	0	0	0	0	0	0	0	0	0	0.170	0.176	0.174	0.193	1.744	0.156	0.837	0.000	0.000	0.000	0.000	0.000	0.000	0.000	0.000	0.000	0.000	0.000	0.000	0.000	0.000	120	613	4941	4404	-2.554	Error	Error	719	4222	0	0	658	3746	0	0	0	0
3	15	1	"PHO87"	"YCR037C"	13740	14230	120	669	662	327	71	73	26	96	94	0	1597	1519	827	288	292	71	86	85	0	0	0	0	0	0	0	0	0	0	0	0	0	0	0	0	0	0	0	0.457	0.480	0.480	0.506	1.938	0.405	0.790	0.000	0.000	0.000	0.000	0.000	0.000	0.000	0.000	0.000	0.000	0.000	0.000	0.000	0.000	120	571	1907	1822	-1.130	Error	Error	598	1309	0	0	591	1231	0	0	0	0
3	16	1	""	"YCL049C"	13930	14230	130	488	470	205	70	73	33	90	89	0	598	551	231	292	296	73	80	74	0	0	0	0	0	0	0	0	0	0	0	0	0	0	0	0	0	0	0	1.366	1.544	1.366	1.343	2.222	1.184	0.561	0.000	0.000	0.000	0.000	0.000	0.000	0.000	0.000	0.000	0.000	0.000	0.000	0.000	0.000	120	661	724	659	0.450	Error	Error	418	306	0	0	400	259	0	0	0	0
3	17	1	"adp1"	"YCR011C"	14130	14240	120	734	733	363	69	72	34	95	93	0	1181	1201	576	283	286	72	88	88	0	0	0	0	0	0	0	0	0	0	0	0	0	0	0	0	0	0	0	0.741	0.723	0.750	0.724	1.824	0.604	0.662	0.000	0.000	0.000	0.000	0.000	0.000	0.000	0.000	0.000	0.000	0.000	0.000	0.000	0.000	120	579	1563	1582	-0.433	Error	Error	665	898	0	0	664	918	0	0	0	0
3	18	1	"MATAlpha2"	"YCR039C"	14310	14240	120	1657	1596	769	71	73	27	99	98	0	2651	2346	1139	281	288	74	92	90	0	0	0	0	0	0	0	0	0	0	0	0	0	0	0	0	0	0	0	0.669	0.738	0.771	0.803	1.786	0.698	0.874	0.000	0.000	0.000	0.000	0.000	0.000	0.000	0.000	0.000	0.000	0.000	0.000	0.000	0.000	120	578	3956	3590	-0.579	Error	Error	1586	2370	0	0	1525	2065	0	0	0	0
3	19	1	"LRE1"	"YCL051W"	14510	14240	120	1085	954	421	72	77	33	97	96	0	2609	2364	1133	281	289	76	89	86	0	0	0	0	0	0	0	0	0	0	0	0	0	0	0	0	0	0	0	0.435	0.423	0.430	0.458	1.758	0.378	0.836	0.000	0.000	0.000	0.000	0.000	0.000	0.000	0.000	0.000	0.000	0.000	0.000	0.000	0.000	120	594	3341	2965	-1.200	Error	Error	1013	2328	0	0	882	2083	0	0	0	0
3	20	1	""	"YCR013C"	14700	14240	120	535	481	214	72	75	30	93	92	0	1156	1067	504	281	284	71	85	83	0	0	0	0	0	0	0	0	0	0	0	0	0	0	0	0	0	0	0	0.529	0.520	0.480	0.467	2.132	0.406	0.730	0.000	0.000	0.000	0.000	0.000	0.000	0.000	0.000	0.000	0.000	0.000	0.000	0.000	0.000	120	564	1338	1195	-0.918	Error	Error	463	875	0	0	409	786	0	0	0	0
3	21	1	""	"YCR041W"	14880	14240	120	2501	2283	1043	70	72	28	97	97	0	2880	2586	1166	280	286	72	92	92	0	0	0	0	0	0	0	0	0	0	0	0	0	0	0	0	0	0	0	0.935	0.960	0.953	0.988	1.536	0.919	0.893	0.000	0.000	0.000	0.000	0.000	0.000	0.000	0.000	0.000	0.000	0.000	0.000	0.000	0.000	120	567	5031	4519	-0.097	Error	Error	2431	2600	0	0	2213	2306	0	0	0	0
3	22	1	"SPB1"	"YCL054W"	15070	14250	120	693	824	613	76	80	30	97	94	0	1140	1292	769	278	284	75	89	88	0	0	0	0	0	0	0	0	0	0	0	0	0	0	0	0	0	0	0	0.716	0.738	0.737	0.684	1.897	0.732	0.845	0.000	0.000	0.000	0.000	0.000	0.000	0.000	0.000	0.000	0.000	0.000	0.000	0.000	0.000	120	632	1479	1762	-0.482	Error	Error	617	862	0	0	748	1014	0	0	0	0
3	1	2	""	"YCR015C"	11090	14430	120	1398	1325	570	70	72	26	97	95	0	1651	1566	672	301	302	74	91	90	0	0	0	0	0	0	0	0	0	0	0	0	0	0	0	0	0	0	0	0.984	0.992	1.010	0.989	1.481	0.963	0.805	0.000	0.000	0.000	0.000	0.000	0.000	0.000	0.000	0.000	0.000	0.000	0.000	0.000	0.000	120	538	2678	2520	-0.024	Error	Error	1328	1350	0	0	1255	1265	0	0	0	0
3	2	2	""	"YCR043C"	11270	14430	120	571	533	225	69	73	50	92	87	0	554	521	213	292	295	69	77	74	0	0	0	0	0	0	0	0	0	0	0	0	0	0	0	0	0	0	0	1.916	2.026	1.857	1.811	1.894	1.628	0.576	0.000	0.000	0.000	0.000	0.000	0.000	0.000	0.000	0.000	0.000	0.000	0.000	0.000	0.000	120	500	764	693	0.938	Error	Error	502	262	0	0	464	229	0	0	0	0
3	3	2	""	"YDR003W"	11460	14430	120	779	747	338	72	75	29	96	93	0	2151	1916	948	289	297	72	88	87	0	0	0	0	0	0	0	0	0	0	0	0	0	0	0	0	0	0	0	0.380	0.415	0.408	0.430	1.589	0.371	0.816	0.000	0.000	0.000	0.000	0.000	0.000	0.000	0.000	0.000	0.000	0.000	0.000	0.000	0.000	120	501	2569	2302	-1.397	Error	Error	707	1862	0	0	675	1627	0	0	0	0
3	4	2	""	"YDR034C-A"	11650	14430	120	4200	3597	1602	80	82	31	100	99	0	5696	4965	2421	304	315	183	95	90	0	0	0	0	0	0	0	0	0	0	0	0	0	0	0	0	0	0	0	0.764	0.755	0.776	0.887	1.751	0.708	0.905	0.000	0.000	0.000	0.000	0.000	0.000	0.000	0.000	0.000	0.000	0.000	0.000	0.000	0.000	120	496	9512	8178	-0.388	Error	Error	4120	5392	0	0	3517	4661	0	0	0	0
3	5	2	""	"YDR063W"	11850	14430	120	228	218	83	77	88	96	78	29	0	520	474	187	297	353	511	0	0	0	0	0	0	0	0	0	0	0	0	0	0	0	0	0	0	0	0	0	0.677	0.797	0.619	0.588	2.567	0.160	0.157	0.000	0.000	0.000	0.000	0.000	0.000	0.000	0.000	0.000	0.000	0.000	0.000	0.000	0.000	120	590	374	318	-0.562	Error	Error	151	223	0	0	141	177	0	0	0	0
3	6	2	"MAF1"	"YDR005C"	12040	14440	120	609	572	271	72	81	74	87	82	0	3410	3195	1704	276	288	135	86	83	0	0	0	0	0	0	0	0	0	0	0	0	0	0	0	0	0	0	0	0.171	0.171	0.171	0.177	1.643	0.145	0.795	0.000	0.000	0.000	0.000	0.000	0.000	0.000	0.000	0.000	0.000	0.000	0.000	0.000	0.000	120	516	3671	3419	-2.545	Error	Error	537	3134	0	0	500	2919	0	0	0	0
3	7	2	""	"YDR034C-D"	12220	14440	120	4933	4531	2375	73	77	46	100	100	0	7217	6492	3211	274	281	84	98	98	0	0	0	0	0	0	0	0	0	0	0	0	0	0	0	0	0	0	0	0.700	0.717	0.735	0.771	1.664	0.717	0.894	0.000	0.000	0.000	0.000	0.000	0.000	0.000	0.000	0.000	0.000	0.000	0.000	0.000	0.000	120	501	11803	10676	-0.515	Error	Error	4860	6943	0	0	4458	6218	0	0	0	0
3	8	2	""	"YDR065W"	12410	14430	120	1266	1166	464	76	89	113	93	90	0	2680	2371	1046	283	338	552	85	82	0	0	0	0	0	0	0	0	0	0	0	0	0	0	0	0	0	0	0	0.496	0.522	0.503	0.546	1.662	0.480	0.874	0.000	0.000	0.000	0.000	0.000	0.000	0.000	0.000	0.000	0.000	0.000	0.000	0.000	0.000	120	566	3587	3178	-1.010	Error	Error	1190	2397	0	0	1090	2088	0	0	0	0
3	9	2	"trp1"	"YDR007W"	12610	14440	110	258	245	113	77	84	43	81	73	0	553	500	220	279	290	86	77	70	0	0	0	0	0	0	0	0	0	0	0	0	0	0	0	0	0	0	0	0.661	0.760	0.613	0.533	2.592	0.510	0.487	0.000	0.000	0.000	0.000	0.000	0.000	0.000	0.000	0.000	0.000	0.000	0.000	0.000	0.000	80	445	455	389	-0.598	Error	Error	181	274	0	0	168	221	0	0	0	0
3	10	2	"ARO3"	"YDR035W"	12780	14430	120	1279	1149	433	67	71	33	100	99	0	1326	1267	494	282	285	70	92	90	0	0	0	0	0	0	0	0	0	0	0	0	0	0	0	0	0	0	0	1.161	1.098	1.059	1.154	1.645	1.052	0.781	0.000	0.000	0.000	0.000	0.000	0.000	0.000	0.000	0.000	0.000	0.000	0.000	0.000	0.000	120	502	2256	2067	0.215	Error	Error	1212	1044	0	0	1082	985	0	0	0	0
3	11	2	""	"YDR067C"	12990	14440	120	1086	1030	463	67	71	34	95	92	0	3138	2835	1232	277	282	71	90	90	0	0	0	0	0	0	0	0	0	0	0	0	0	0	0	0	0	0	0	0.356	0.376	0.377	0.350	1.666	0.359	0.861	0.000	0.000	0.000	0.000	0.000	0.000	0.000	0.000	0.000	0.000	0.000	0.000	0.000	0.000	120	505	3880	3521	-1.489	Error	Error	1019	2861	0	0	963	2558	0	0	0	0
3	12	2	"GAL3"	"YDR009W"	13170	14440	120	1272	1135	487	69	79	71	97	90	0	1233	1141	516	285	301	139	85	83	0	0	0	0	0	0	0	0	0	0	0	0	0	0	0	0	0	0	0	1.269	1.245	1.263	1.252	1.896	1.182	0.805	0.000	0.000	0.000	0.000	0.000	0.000	0.000	0.000	0.000	0.000	0.000	0.000	0.000	0.000	120	499	2151	1922	0.344	Error	Error	1203	948	0	0	1066	856	0	0	0	0
3	13	2	"KRS1"	"YDR037W"	13370	14440	130	972	901	366	70	78	68	93	91	0	3568	3353	1320	279	296	148	96	93	0	0	0	0	0	0	0	0	0	0	0	0	0	0	0	0	0	0	0	0.274	0.270	0.283	0.262	1.557	0.261	0.832	0.000	0.000	0.000	0.000	0.000	0.000	0.000	0.000	0.000	0.000	0.000	0.000	0.000	0.000	120	574	4191	3905	-1.866	Error	Error	902	3289	0	0	831	3074	0	0	0	0
3	14	2	"DOA4"	"YDR069C"	13560	14440	120	144	145	53	70	74	37	76	49	0	629	622	227	281	284	73	89	87	0	0	0	0	0	0	0	0	0	0	0	0	0	0	0	0	0	0	0	0.213	0.220	0.207	0.192	2.071	0.177	0.459	0.000	0.000	0.000	0.000	0.000	0.000	0.000	0.000	0.000	0.000	0.000	0.000	0.000	0.000	120	542	422	416	-2.233	Error	Error	74	348	0	0	75	341	0	0	0	0
3	15	2	""	"YDR365W-B"	13760	14420	130	6321	6161	3104	76	78	36	100	100	0	6448	6036	2884	291	293	74	95	95	0	0	0	0	0	0	0	0	0	0	0	0	0	0	0	0	0	0	0	1.014	1.059	1.090	1.207	1.953	1.063	0.873	0.000	0.000	0.000	0.000	0.000	0.000	0.000	0.000	0.000	0.000	0.000	0.000	0.000	0.000	120	600	12402	11830	0.020	Error	Error	6245	6157	0	0	6085	5745	0	0	0	0
3	16	2	"NCB2"	"YDR397C"	13940	14430	120	519	577	286	71	74	27	99	95	0	597	599	288	284	286	70	81	73	0	0	0	0	0	0	0	0	0	0	0	0	0	0	0	0	0	0	0	1.431	1.606	1.390	1.618	2.026	1.298	0.676	0.000	0.000	0.000	0.000	0.000	0.000	0.000	0.000	0.000	0.000	0.000	0.000	0.000	0.000	120	524	761	821	0.517	Error	Error	448	313	0	0	506	315	0	0	0	0
3	17	2	"TIF35"	"YDR429C"	14130	14430	120	1276	1199	525	69	72	28	97	97	0	1627	1561	715	279	283	71	90	87	0	0	0	0	0	0	0	0	0	0	0	0	0	0	0	0	0	0	0	0.895	0.881	0.850	0.930	1.789	0.792	0.848	0.000	0.000	0.000	0.000	0.000	0.000	0.000	0.000	0.000	0.000	0.000	0.000	0.000	0.000	120	521	2555	2412	-0.159	Error	Error	1207	1348	0	0	1130	1282	0	0	0	0
3	18	2	""	"YDR367W"	14320	14430	120	919	830	344	71	73	26	98	97	0	903	856	328	274	278	73	90	87	0	0	0	0	0	0	0	0	0	0	0	0	0	0	0	0	0	0	0	1.348	1.304	1.300	1.237	1.931	1.255	0.756	0.000	0.000	0.000	0.000	0.000	0.000	0.000	0.000	0.000	0.000	0.000	0.000	0.000	0.000	120	538	1477	1341	0.431	Error	Error	848	629	0	0	759	582	0	0	0	0
3	19	2	"HPT1"	"YDR399W"	14520	14430	120	917	897	410	70	73	29	99	99	0	898	878	373	271	274	74	89	86	0	0	0	0	0	0	0	0	0	0	0	0	0	0	0	0	0	0	0	1.351	1.362	1.365	1.443	1.656	1.263	0.787	0.000	0.000	0.000	0.000	0.000	0.000	0.000	0.000	0.000	0.000	0.000	0.000	0.000	0.000	120	520	1474	1434	0.434	Error	Error	847	627	0	0	827	607	0	0	0	0
3	20	2	""	"YDR431W"	14700	14430	120	330	336	141	72	75	29	91	90	0	394	385	166	269	274	71	62	45	0	0	0	0	0	0	0	0	0	0	0	0	0	0	0	0	0	0	0	2.064	2.276	1.733	1.723	3.110	1.243	0.326	0.000	0.000	0.000	0.000	0.000	0.000	0.000	0.000	0.000	0.000	0.000	0.000	0.000	0.000	120	539	383	380	1.045	Error	Error	258	125	0	0	264	116	0	0	0	0
3	21	2	"xrs2"	"YDR369C"	14910	14430	130	1473	1470	531	72	75	36	100	100	0	1954	1853	656	278	284	80	97	96	0	0	0	0	0	0	0	0	0	0	0	0	0	0	0	0	0	0	0	0.836	0.888	0.898	0.909	1.333	0.862	0.856	0.000	0.000	0.000	0.000	0.000	0.000	0.000	0.000	0.000	0.000	0.000	0.000	0.000	0.000	120	569	3077	2973	-0.259	Error	Error	1401	1676	0	0	1398	1575	0	0	0	0
3	22	2	""	"YDR401W"	15090	14430	130	911	876	403	71	75	35	95	93	0	2509	2555	1230	281	287	86	91	90	0	0	0	0	0	0	0	0	0	0	0	0	0	0	0	0	0	0	0	0.377	0.354	0.353	0.371	1.683	0.342	0.833	0.000	0.000	0.000	0.000	0.000	0.000	0.000	0.000	0.000	0.000	0.000	0.000	0.000	0.000	120	643	3068	3079	-1.407	Error	Error	840	2228	0	0	805	2274	0	0	0	0
3	1	3	""	"YDR433W"	11110	14630	120	333	383	222	76	80	51	90	85	0	482	482	195	295	300	80	72	60	0	0	0	0	0	0	0	0	0	0	0	0	0	0	0	0	0	0	0	1.374	1.642	1.393	1.294	3.147	1.364	0.409	0.000	0.000	0.000	0.000	0.000	0.000	0.000	0.000	0.000	0.000	0.000	0.000	0.000	0.000	120	592	444	494	0.459	Error	Error	257	187	0	0	307	187	0	0	0	0
3	2	3	""	"YDR371W"	11300	14630	120	2545	2257	968	74	79	51	99	98	0	3287	2970	1223	294	299	76	97	95	0	0	0	0	0	0	0	0	0	0	0	0	0	0	0	0	0	0	0	0.826	0.816	0.825	0.843	1.582	0.792	0.866	0.000	0.000	0.000	0.000	0.000	0.000	0.000	0.000	0.000	0.000	0.000	0.000	0.000	0.000	120	524	5464	4859	-0.276	Error	Error	2471	2993	0	0	2183	2676	0	0	0	0
3	3	3	"DIT1"	"YDR403W"	11490	14620	120	1246	1159	570	75	79	31	99	96	0	2431	2307	1090	292	299	80	92	88	0	0	0	0	0	0	0	0	0	0	0	0	0	0	0	0	0	0	0	0.547	0.538	0.559	0.546	1.470	0.513	0.864	0.000	0.000	0.000	0.000	0.000	0.000	0.000	0.000	0.000	0.000	0.000	0.000	0.000	0.000	120	532	3310	3099	-0.869	Error	Error	1171	2139	0	0	1084	2015	0	0	0	0
3	4	3	""	"YDR435C"	11690	14620	120	1036	996	496	78	81	31	99	98	0	1878	1750	844	293	305	171	84	83	0	0	0	0	0	0	0	0	0	0	0	0	0	0	0	0	0	0	0	0.604	0.630	0.648	0.685	1.814	0.612	0.883	0.000	0.000	0.000	0.000	0.000	0.000	0.000	0.000	0.000	0.000	0.000	0.000	0.000	0.000	120	591	2543	2375	-0.726	Error	Error	958	1585	0	0	918	1457	0	0	0	0
3	5	3	"SWI4"	"YER111C"	11900	14630	90	140	143	58	76	81	32	75	48	0	335	349	153	293	297	83	40	26	0	0	0	0	0	0	0	0	0	0	0	0	0	0	0	0	0	0	0	1.524	1.196	0.447	0.574	3.581	0.225	0.195	0.000	0.000	0.000	0.000	0.000	0.000	0.000	0.000	0.000	0.000	0.000	0.000	0.000	0.000	52	371	106	123	0.608	Error	Error	64	42	0	0	67	56	0	0	0	0
3	6	3	""	"YER140W"	12070	14620	120	1137	1205	708	75	77	29	95	94	0	670	642	306	277	282	75	83	80	0	0	0	0	0	0	0	0	0	0	0	0	0	0	0	0	0	0	0	2.702	3.096	2.633	2.798	1.807	2.833	0.749	0.000	0.000	0.000	0.000	0.000	0.000	0.000	0.000	0.000	0.000	0.000	0.000	0.000	0.000	120	500	1455	1495	1.434	Error	Error	1062	393	0	0	1130	365	0	0	0	0
3	7	3	"rad3"	"YER171W"	12260	14620	120	740	760	435	75	76	28	95	95	0	3094	3195	1867	272	279	73	97	96	0	0	0	0	0	0	0	0	0	0	0	0	0	0	0	0	0	0	0	0.236	0.234	0.223	0.240	1.746	0.211	0.821	0.000	0.000	0.000	0.000	0.000	0.000	0.000	0.000	0.000	0.000	0.000	0.000	0.000	0.000	120	494	3487	3608	-2.085	Error	Error	665	2822	0	0	685	2923	0	0	0	0
3	8	3	""	"YER113C"	12460	14620	120	1420	1360	629	76	79	35	98	96	0	1181	1108	512	275	280	75	85	84	0	0	0	0	0	0	0	0	0	0	0	0	0	0	0	0	0	0	0	1.483	1.541	1.450	1.541	1.815	1.487	0.827	0.000	0.000	0.000	0.000	0.000	0.000	0.000	0.000	0.000	0.000	0.000	0.000	0.000	0.000	120	536	2250	2117	0.569	Error	Error	1344	906	0	0	1284	833	0	0	0	0
3	9	3	"MAG1"	"YER142C"	12650	14620	120	326	384	256	73	76	33	90	85	0	854	954	615	277	282	80	82	79	0	0	0	0	0	0	0	0	0	0	0	0	0	0	0	0	0	0	0	0.438	0.459	0.436	0.437	1.943	0.407	0.797	0.000	0.000	0.000	0.000	0.000	0.000	0.000	0.000	0.000	0.000	0.000	0.000	0.000	0.000	120	494	830	988	-1.189	Error	Error	253	577	0	0	311	677	0	0	0	0
3	10	3	"rad24"	"YER173W"	12830	14620	120	964	1039	533	70	72	25	99	97	0	769	806	377	280	282	77	85	84	0	0	0	0	0	0	0	0	0	0	0	0	0	0	0	0	0	0	0	1.828	1.842	1.774	1.863	2.066	1.753	0.777	0.000	0.000	0.000	0.000	0.000	0.000	0.000	0.000	0.000	0.000	0.000	0.000	0.000	0.000	120	502	1383	1495	0.870	Error	Error	894	489	0	0	969	526	0	0	0	0
3	11	3	"spr6"	"YER115C"	13030	14620	120	614	606	271	71	74	27	95	93	0	492	472	172	271	279	73	81	66	0	0	0	0	0	0	0	0	0	0	0	0	0	0	0	0	0	0	0	2.457	2.662	2.567	2.263	2.589	2.421	0.445	0.000	0.000	0.000	0.000	0.000	0.000	0.000	0.000	0.000	0.000	0.000	0.000	0.000	0.000	120	485	764	736	1.297	Error	Error	543	221	0	0	535	201	0	0	0	0
3	12	3	"UBP5"	"YER144C"	13210	14620	110	597	734	553	75	87	89	90	86	0	1378	1501	954	276	313	243	86	78	0	0	0	0	0	0	0	0	0	0	0	0	0	0	0	0	0	0	0	0.474	0.538	0.542	0.543	1.641	0.498	0.790	0.000	0.000	0.000	0.000	0.000	0.000	0.000	0.000	0.000	0.000	0.000	0.000	0.000	0.000	80	462	1624	1884	-1.078	Error	Error	522	1102	0	0	659	1225	0	0	0	0
3	13	3	""	"YER175C"	13400	14620	120	1067	988	449	72	81	64	94	90	0	611	590	249	273	304	220	71	28	0	0	0	0	0	0	0	0	0	0	0	0	0	0	0	0	0	0	0	2.944	2.890	2.746	2.740	2.447	2.201	0.421	0.000	0.000	0.000	0.000	0.000	0.000	0.000	0.000	0.000	0.000	0.000	0.000	0.000	0.000	120	536	1333	1233	1.558	Error	Error	995	338	0	0	916	317	0	0	0	0
3	14	3	"RPL23B"	"YER117W"	13590	14620	110	1569	1380	633	76	79	36	100	98	0	1695	1621	741	276	293	128	85	82	0	0	0	0	0	0	0	0	0	0	0	0	0	0	0	0	0	0	0	1.052	0.970	0.988	0.991	1.372	0.920	0.854	0.000	0.000	0.000	0.000	0.000	0.000	0.000	0.000	0.000	0.000	0.000	0.000	0.000	0.000	80	501	2912	2649	0.073	Error	Error	1493	1419	0	0	1304	1345	0	0	0	0
3	15	3	"LSM5"	"YER146W"	13800	14630	110	180	178	84	77	81	37	71	57	0	458	440	217	293	306	127	61	31	0	0	0	0	0	0	0	0	0	0	0	0	0	0	0	0	0	0	0	0.624	0.687	0.570	0.420	2.660	0.341	0.400	0.000	0.000	0.000	0.000	0.000	0.000	0.000	0.000	0.000	0.000	0.000	0.000	0.000	0.000	80	535	268	248	-0.680	Error	Error	103	165	0	0	101	147	0	0	0	0
3	16	3	"bmh1"	"YER177W"	13980	14620	110	1699	1450	749	74	83	81	92	87	0	1297	1182	615	285	300	122	78	78	0	0	0	0	0	0	0	0	0	0	0	0	0	0	0	0	0	0	0	1.606	1.534	1.484	1.603	1.619	1.445	0.881	0.000	0.000	0.000	0.000	0.000	0.000	0.000	0.000	0.000	0.000	0.000	0.000	0.000	0.000	80	492	2637	2273	0.683	Error	Error	1625	1012	0	0	1376	897	0	0	0	0
3	17	3	"cup2"	"YGL166W"	14160	14620	110	969	906	461	73	85	90	83	82	0	971	882	455	281	297	131	80	77	0	0	0	0	0	0	0	0	0	0	0	0	0	0	0	0	0	0	0	1.299	1.386	1.295	1.267	1.937	1.251	0.800	0.000	0.000	0.000	0.000	0.000	0.000	0.000	0.000	0.000	0.000	0.000	0.000	0.000	0.000	80	501	1586	1434	0.377	Error	Error	896	690	0	0	833	601	0	0	0	0
3	18	3	""	"YGL198W"	14350	14620	110	1010	897	425	72	93	123	82	81	0	580	504	221	276	289	98	77	67	0	0	0	0	0	0	0	0	0	0	0	0	0	0	0	0	0	0	0	3.086	3.618	3.076	3.095	1.636	3.030	0.652	0.000	0.000	0.000	0.000	0.000	0.000	0.000	0.000	0.000	0.000	0.000	0.000	0.000	0.000	80	511	1242	1053	1.626	Error	Error	938	304	0	0	825	228	0	0	0	0
3	19	3	"SAP4"	"YGL229C"	14540	14620	110	1559	1537	772	72	104	168	95	90	0	1336	1381	703	274	300	162	87	83	0	0	0	0	0	0	0	0	0	0	0	0	0	0	0	0	0	0	0	1.400	1.323	1.273	1.373	1.417	1.242	0.835	0.000	0.000	0.000	0.000	0.000	0.000	0.000	0.000	0.000	0.000	0.000	0.000	0.000	0.000	80	520	2549	2572	0.486	Error	Error	1487	1062	0	0	1465	1107	0	0	0	0
3	20	3	""	"YGL168W"	14740	14620	110	505	447	213	74	89	113	78	75	0	1236	1069	525	281	304	166	81	78	0	0	0	0	0	0	0	0	0	0	0	0	0	0	0	0	0	0	0	0.451	0.473	0.440	0.402	1.605	0.412	0.796	0.000	0.000	0.000	0.000	0.000	0.000	0.000	0.000	0.000	0.000	0.000	0.000	0.000	0.000	80	510	1386	1161	-1.148	Error	Error	431	955	0	0	373	788	0	0	0	0
3	21	3	"EMP24"	"YGL200C"	14920	14620	110	1424	1288	652	73	104	178	83	82	0	697	639	300	282	309	140	77	72	0	0	0	0	0	0	0	0	0	0	0	0	0	0	0	0	0	0	0	3.255	3.403	2.936	3.091	1.673	2.906	0.738	0.000	0.000	0.000	0.000	0.000	0.000	0.000	0.000	0.000	0.000	0.000	0.000	0.000	0.000	80	507	1766	1572	1.703	Error	Error	1351	415	0	0	1215	357	0	0	0	0
3	22	3	""	"YGL231C"	15120	14620	110	1516	1285	681	71	99	162	85	80	0	4533	3943	2052	285	331	289	87	83	0	0	0	0	0	0	0	0	0	0	0	0	0	0	0	0	0	0	0	0.340	0.332	0.338	0.344	1.537	0.316	0.900	0.000	0.000	0.000	0.000	0.000	0.000	0.000	0.000	0.000	0.000	0.000	0.000	0.000	0.000	80	552	5693	4872	-1.556	Error	Error	1445	4248	0	0	1214	3658	0	0	0	0
3	1	4	""	"YGL170C"	11130	14810	110	1235	1090	512	77	84	58	95	87	0	4005	3499	1672	291	395	1032	80	80	0	0	0	0	0	0	0	0	0	0	0	0	0	0	0	0	0	0	0	0.312	0.316	0.328	0.343	1.548	0.210	0.593	0.000	0.000	0.000	0.000	0.000	0.000	0.000	0.000	0.000	0.000	0.000	0.000	0.000	0.000	80	530	4872	4221	-1.681	Error	Error	1158	3714	0	0	1013	3208	0	0	0	0
3	2	4	"ARO8"	"YGL202W"	11320	14810	110	2066	1973	824	79	95	93	100	100	0	3629	3521	1236	301	374	433	100	97	0	0	0	0	0	0	0	0	0	0	0	0	0	0	0	0	0	0	0	0.597	0.588	0.596	0.565	1.339	0.578	0.906	0.000	0.000	0.000	0.000	0.000	0.000	0.000	0.000	0.000	0.000	0.000	0.000	0.000	0.000	80	498	5315	5114	-0.744	Error	Error	1987	3328	0	0	1894	3220	0	0	0	0
3	3	4	"SEC15"	"YGL233W"	11510	14810	110	979	1129	718	81	101	113	92	87	0	1091	1136	670	290	339	279	80	68	0	0	0	0	0	0	0	0	0	0	0	0	0	0	0	0	0	0	0	1.121	1.239	1.257	1.206	1.709	1.174	0.752	0.000	0.000	0.000	0.000	0.000	0.000	0.000	0.000	0.000	0.000	0.000	0.000	0.000	0.000	80	512	1699	1894	0.165	Error	Error	898	801	0	0	1048	846	0	0	0	0
3	4	4	"NUP49"	"YGL172W"	11700	14810	110	1840	1681	769	85	103	106	100	97	0	931	857	382	290	313	150	80	78	0	0	0	0	0	0	0	0	0	0	0	0	0	0	0	0	0	0	0	2.738	2.815	2.907	2.972	1.598	2.684	0.776	0.000	0.000	0.000	0.000	0.000	0.000	0.000	0.000	0.000	0.000	0.000	0.000	0.000	0.000	80	509	2396	2163	1.453	Error	Error	1755	641	0	0	1596	567	0	0	0	0
3	5	4	""	"YGL204C"	11880	14810	110	459	432	204	83	94	74	83	81	0	711	654	313	288	303	120	78	72	0	0	0	0	0	0	0	0	0	0	0	0	0	0	0	0	0	0	0	0.889	0.954	0.814	0.767	2.139	0.709	0.709	0.000	0.000	0.000	0.000	0.000	0.000	0.000	0.000	0.000	0.000	0.000	0.000	0.000	0.000	80	536	799	715	-0.170	Error	Error	376	423	0	0	349	366	0	0	0	0
3	6	4	""	"YGL235W"	12090	14810	110	695	653	350	79	85	42	85	83	0	676	608	338	279	288	91	76	73	0	0	0	0	0	0	0	0	0	0	0	0	0	0	0	0	0	0	0	1.552	1.745	1.622	1.461	2.339	1.378	0.691	0.000	0.000	0.000	0.000	0.000	0.000	0.000	0.000	0.000	0.000	0.000	0.000	0.000	0.000	80	512	1013	903	0.634	Error	Error	616	397	0	0	574	329	0	0	0	0
3	7	4	"RTT102"	"YGR275W"	12280	14810	120	676	629	284	77	79	27	94	91	0	624	576	242	274	277	67	80	77	0	0	0	0	0	0	0	0	0	0	0	0	0	0	0	0	0	0	0	1.711	1.828	1.620	1.728	2.123	1.592	0.667	0.000	0.000	0.000	0.000	0.000	0.000	0.000	0.000	0.000	0.000	0.000	0.000	0.000	0.000	120	562	949	854	0.775	Error	Error	599	350	0	0	552	302	0	0	0	0
3	8	4	""	"YHL009W-B"	12470	14810	110	187	188	89	75	78	32	78	68	0	552	506	286	265	274	75	72	65	0	0	0	0	0	0	0	0	0	0	0	0	0	0	0	0	0	0	0	0.390	0.469	0.352	0.360	2.373	0.289	0.492	0.000	0.000	0.000	0.000	0.000	0.000	0.000	0.000	0.000	0.000	0.000	0.000	0.000	0.000	80	477	399	354	-1.358	Error	Error	112	287	0	0	113	241	0	0	0	0
3	9	4	""	"YHL041W"	12650	14810	110	533	480	239	75	83	60	83	81	0	651	594	311	276	286	99	75	72	0	0	0	0	0	0	0	0	0	0	0	0	0	0	0	0	0	0	0	1.221	1.274	1.114	0.963	2.562	0.948	0.697	0.000	0.000	0.000	0.000	0.000	0.000	0.000	0.000	0.000	0.000	0.000	0.000	0.000	0.000	80	504	833	723	0.288	Error	Error	458	375	0	0	405	318	0	0	0	0
3	10	4	""	"YGR277C"	12850	14800	110	2039	1796	832	76	109	215	92	85	0	875	784	337	276	298	132	81	77	0	0	0	0	0	0	0	0	0	0	0	0	0	0	0	0	0	0	0	3.277	3.386	3.122	3.321	1.989	3.217	0.785	0.000	0.000	0.000	0.000	0.000	0.000	0.000	0.000	0.000	0.000	0.000	0.000	0.000	0.000	80	512	2562	2228	1.712	Error	Error	1963	599	0	0	1720	508	0	0	0	0
3	11	4	"PRS3"	"YHL011C"	13050	14810	120	1990	1786	872	75	102	201	86	85	0	1985	1844	834	276	290	115	85	84	0	0	0	0	0	0	0	0	0	0	0	0	0	0	0	0	0	0	0	1.121	1.091	1.072	1.159	1.890	1.098	0.855	0.000	0.000	0.000	0.000	0.000	0.000	0.000	0.000	0.000	0.000	0.000	0.000	0.000	0.000	120	562	3624	3279	0.164	Error	Error	1915	1709	0	0	1711	1568	0	0	0	0
3	12	4	"ECM34"	"YHL043W"	13220	14820	110	1284	1124	563	75	98	154	85	82	0	1558	1375	741	272	310	216	80	77	0	0	0	0	0	0	0	0	0	0	0	0	0	0	0	0	0	0	0	0.940	0.951	0.867	0.961	1.966	0.863	0.857	0.000	0.000	0.000	0.000	0.000	0.000	0.000	0.000	0.000	0.000	0.000	0.000	0.000	0.000	80	484	2495	2152	-0.089	Error	Error	1209	1286	0	0	1049	1103	0	0	0	0
3	13	4	"SCW4"	"YGR279C"	13420	14810	110	1640	1396	734	74	95	141	85	78	0	1705	1505	754	268	311	225	77	77	0	0	0	0	0	0	0	0	0	0	0	0	0	0	0	0	0	0	0	1.090	1.069	1.078	1.090	1.474	1.030	0.842	0.000	0.000	0.000	0.000	0.000	0.000	0.000	0.000	0.000	0.000	0.000	0.000	0.000	0.000	80	522	3003	2559	0.124	Error	Error	1566	1437	0	0	1322	1237	0	0	0	0
3	14	4	""	"YHL013C"	13610	14810	110	1730	1465	741	76	82	42	98	96	0	3410	2914	1476	276	306	189	85	85	0	0	0	0	0	0	0	0	0	0	0	0	0	0	0	0	0	0	0	0.528	0.527	0.527	0.563	1.712	0.493	0.891	0.000	0.000	0.000	0.000	0.000	0.000	0.000	0.000	0.000	0.000	0.000	0.000	0.000	0.000	80	525	4788	4027	-0.922	Error	Error	1654	3134	0	0	1389	2638	0	0	0	0
3	15	4	""	"YHL045W"	13800	14810	110	4988	4668	2651	80	84	38	100	98	0	5572	5036	2933	290	317	192	90	87	0	0	0	0	0	0	0	0	0	0	0	0	0	0	0	0	0	0	0	0.929	0.967	0.983	1.072	1.685	0.922	0.920	0.000	0.000	0.000	0.000	0.000	0.000	0.000	0.000	0.000	0.000	0.000	0.000	0.000	0.000	80	516	10190	9334	-0.106	Error	Error	4908	5282	0	0	4588	4746	0	0	0	0
3	16	4	"YOR1"	"YGR281W"	13990	14810	110	429	422	220	79	89	78	81	76	0	822	775	434	290	314	175	73	66	0	0	0	0	0	0	0	0	0	0	0	0	0	0	0	0	0	0	0	0.658	0.707	0.620	0.685	2.336	0.529	0.680	0.000	0.000	0.000	0.000	0.000	0.000	0.000	0.000	0.000	0.000	0.000	0.000	0.000	0.000	80	525	882	828	-0.604	Error	Error	350	532	0	0	343	485	0	0	0	0
3	17	4	"RPS20"	"YHL015W"	14180	14810	110	641	561	288	75	81	47	83	80	0	1349	1135	596	283	292	102	76	76	0	0	0	0	0	0	0	0	0	0	0	0	0	0	0	0	0	0	0	0.531	0.570	0.537	0.458	1.974	0.510	0.858	0.000	0.000	0.000	0.000	0.000	0.000	0.000	0.000	0.000	0.000	0.000	0.000	0.000	0.000	80	526	1632	1338	-0.913	Error	Error	566	1066	0	0	486	852	0	0	0	0
3	18	4	""	"YHL047C"	14380	14820	120	1450	1460	884	73	83	79	93	88	0	1877	1820	1080	271	283	83	88	85	0	0	0	0	0	0	0	0	0	0	0	0	0	0	0	0	0	0	0	0.857	0.895	0.905	0.944	2.060	0.875	0.875	0.000	0.000	0.000	0.000	0.000	0.000	0.000	0.000	0.000	0.000	0.000	0.000	0.000	0.000	120	573	2983	2936	-0.222	Error	Error	1377	1606	0	0	1387	1549	0	0	0	0
3	19	4	""	"YIL077C"	14570	14820	120	1960	1788	843	72	83	111	93	89	0	3312	2956	1331	275	288	124	90	88	0	0	0	0	0	0	0	0	0	0	0	0	0	0	0	0	0	0	0	0.622	0.640	0.649	0.683	1.809	0.630	0.916	0.000	0.000	0.000	0.000	0.000	0.000	0.000	0.000	0.000	0.000	0.000	0.000	0.000	0.000	120	518	4925	4397	-0.686	Error	Error	1888	3037	0	0	1716	2681	0	0	0	0
3	20	4	"SEC24"	"YIL109C"	14750	14820	120	2461	2225	1062	74	77	32	98	96	0	3333	2946	1505	280	290	93	90	89	0	0	0	0	0	0	0	0	0	0	0	0	0	0	0	0	0	0	0	0.782	0.807	0.845	0.948	1.957	0.745	0.882	0.000	0.000	0.000	0.000	0.000	0.000	0.000	0.000	0.000	0.000	0.000	0.000	0.000	0.000	120	539	5440	4817	-0.355	Error	Error	2387	3053	0	0	2151	2666	0	0	0	0
3	21	4	""	"YIL141W"	14950	14820	120	1312	1149	542	74	90	119	89	86	0	1284	1154	547	280	297	123	84	80	0	0	0	0	0	0	0	0	0	0	0	0	0	0	0	0	0	0	0	1.233	1.230	1.222	1.117	1.897	1.172	0.851	0.000	0.000	0.000	0.000	0.000	0.000	0.000	0.000	0.000	0.000	0.000	0.000	0.000	0.000	120	558	2242	1949	0.302	Error	Error	1238	1004	0	0	1075	874	0	0	0	0
3	22	4	""	"YIL079C"	15140	14820	120	1943	1739	841	75	81	44	97	96	0	1597	1436	668	284	312	266	84	76	0	0	0	0	0	0	0	0	0	0	0	0	0	0	0	0	0	0	0	1.423	1.444	1.418	1.484	1.625	1.422	0.851	0.000	0.000	0.000	0.000	0.000	0.000	0.000	0.000	0.000	0.000	0.000	0.000	0.000	0.000	120	576	3181	2816	0.509	Error	Error	1868	1313	0	0	1664	1152	0	0	0	0
3	1	5	"COX5b"	"YIL111W"	11140	15000	110	1022	931	491	77	86	59	87	83	0	1302	1185	666	287	316	232	77	76	0	0	0	0	0	0	0	0	0	0	0	0	0	0	0	0	0	0	0	0.931	0.951	0.875	0.855	2.056	0.864	0.819	0.000	0.000	0.000	0.000	0.000	0.000	0.000	0.000	0.000	0.000	0.000	0.000	0.000	0.000	80	562	1960	1752	-0.103	Error	Error	945	1015	0	0	854	898	0	0	0	0
3	2	5	"SSL2"	"YIL143C"	11330	15000	110	1798	1845	978	79	99	130	96	92	0	2483	2342	1152	286	352	385	88	83	0	0	0	0	0	0	0	0	0	0	0	0	0	0	0	0	0	0	0	0.782	0.859	0.911	0.893	1.682	0.852	0.787	0.000	0.000	0.000	0.000	0.000	0.000	0.000	0.000	0.000	0.000	0.000	0.000	0.000	0.000	80	513	3916	3822	-0.354	Error	Error	1719	2197	0	0	1766	2056	0	0	0	0
3	3	5	""	"YIL082W"	11520	15000	110	9576	8445	4487	81	180	634	96	83	0	5506	4729	2386	286	410	654	83	80	0	0	0	0	0	0	0	0	0	0	0	0	0	0	0	0	0	0	0	1.819	1.883	1.973	2.042	1.651	1.877	0.912	0.000	0.000	0.000	0.000	0.000	0.000	0.000	0.000	0.000	0.000	0.000	0.000	0.000	0.000	80	520	14715	12807	0.863	Error	Error	9495	5220	0	0	8364	4443	0	0	0	0
3	4	5	""	"YIL113W"	11700	15010	110	899	796	370	87	186	635	76	2	0	587	553	257	296	387	585	6	0	0	0	0	0	0	0	0	0	0	0	0	0	0	0	0	0	0	0	0	2.790	2.759	2.464	2.262	2.367	1.249	0.819	0.000	0.000	0.000	0.000	0.000	0.000	0.000	0.000	0.000	0.000	0.000	0.000	0.000	0.000	80	515	1103	966	1.480	Error	Error	812	291	0	0	709	257	0	0	0	0
3	5	5	""	"YIL145C"	11910	15000	110	2125	1837	1101	84	104	126	88	81	0	933	822	445	283	301	123	76	73	0	0	0	0	0	0	0	0	0	0	0	0	0	0	0	0	0	0	0	3.140	3.252	2.996	2.970	1.643	3.245	0.766	0.000	0.000	0.000	0.000	0.000	0.000	0.000	0.000	0.000	0.000	0.000	0.000	0.000	0.000	80	555	2691	2292	1.651	Error	Error	2041	650	0	0	1753	539	0	0	0	0
3	6	5	""	"YIL083C"	12100	15000	110	1200	1036	536	80	91	86	85	81	0	674	596	301	278	287	96	76	73	0	0	0	0	0	0	0	0	0	0	0	0	0	0	0	0	0	0	0	2.828	3.006	2.583	2.545	2.339	2.528	0.699	0.000	0.000	0.000	0.000	0.000	0.000	0.000	0.000	0.000	0.000	0.000	0.000	0.000	0.000	80	508	1516	1274	1.500	Error	Error	1120	396	0	0	956	318	0	0	0	0
3	7	5	"NUP159"	"YIL115C"	12270	15000	110	231	227	117	78	84	44	77	71	0	397	383	190	282	287	77	58	37	0	0	0	0	0	0	0	0	0	0	0	0	0	0	0	0	0	0	0	1.330	1.475	1.050	0.880	3.535	0.586	0.378	0.000	0.000	0.000	0.000	0.000	0.000	0.000	0.000	0.000	0.000	0.000	0.000	0.000	0.000	80	465	268	250	0.412	Error	Error	153	115	0	0	149	101	0	0	0	0
3	8	5	"SLN1"	"YIL147C"	12470	15010	120	1554	1476	740	78	84	61	98	97	0	1635	1684	966	277	289	106	85	82	0	0	0	0	0	0	0	0	0	0	0	0	0	0	0	0	0	0	0	1.087	0.994	1.008	1.135	1.946	0.865	0.807	0.000	0.000	0.000	0.000	0.000	0.000	0.000	0.000	0.000	0.000	0.000	0.000	0.000	0.000	120	573	2834	2805	0.120	Error	Error	1476	1358	0	0	1398	1407	0	0	0	0
3	9	5	""	"YJR015W"	12660	15010	120	1127	991	468	76	86	69	91	89	0	3613	3343	1679	284	303	201	91	90	0	0	0	0	0	0	0	0	0	0	0	0	0	0	0	0	0	0	0	0.316	0.299	0.312	0.314	1.692	0.278	0.875	0.000	0.000	0.000	0.000	0.000	0.000	0.000	0.000	0.000	0.000	0.000	0.000	0.000	0.000	120	525	4380	3974	-1.663	Error	Error	1051	3329	0	0	915	3059	0	0	0	0
3	10	5	"ANB1"	"YJR047C"	12840	15010	120	1146	964	461	77	90	132	89	82	0	809	727	350	278	287	86	77	75	0	0	0	0	0	0	0	0	0	0	0	0	0	0	0	0	0	0	0	2.013	1.976	1.923	2.006	1.725	1.712	0.742	0.000	0.000	0.000	0.000	0.000	0.000	0.000	0.000	0.000	0.000	0.000	0.000	0.000	0.000	120	568	1600	1336	1.009	Error	Error	1069	531	0	0	887	449	0	0	0	0
3	11	5	""	"YJR079W"	13050	15010	110	141	152	84	77	92	136	15	2	0	449	393	207	275	285	110	65	36	0	0	0	0	0	0	0	0	0	0	0	0	0	0	0	0	0	0	0	0.368	0.636	0.328	0.324	2.903	0.295	0.306	0.000	0.000	0.000	0.000	0.000	0.000	0.000	0.000	0.000	0.000	0.000	0.000	0.000	0.000	80	481	238	193	-1.443	Error	Error	64	174	0	0	75	118	0	0	0	0
3	12	5	"ess1"	"YJR017C"	13220	15010	120	512	464	213	72	76	28	90	86	0	604	558	243	269	279	83	80	70	0	0	0	0	0	0	0	0	0	0	0	0	0	0	0	0	0	0	0	1.313	1.356	1.260	1.157	2.070	1.113	0.651	0.000	0.000	0.000	0.000	0.000	0.000	0.000	0.000	0.000	0.000	0.000	0.000	0.000	0.000	120	496	775	681	0.393	Error	Error	440	335	0	0	392	289	0	0	0	0
3	13	5	"UTR1"	"YJR049C"	13400	15000	110	1721	1630	893	72	95	158	86	82	0	916	823	467	275	296	126	75	71	0	0	0	0	0	0	0	0	0	0	0	0	0	0	0	0	0	0	0	2.573	2.843	2.579	2.989	1.799	2.539	0.803	0.000	0.000	0.000	0.000	0.000	0.000	0.000	0.000	0.000	0.000	0.000	0.000	0.000	0.000	80	482	2290	2106	1.363	Error	Error	1649	641	0	0	1558	548	0	0	0	0
3	14	5	""	"YJR082C"	13590	15010	120	1061	935	402	77	94	135	90	85	0	689	639	284	277	294	132	78	70	0	0	0	0	0	0	0	0	0	0	0	0	0	0	0	0	0	0	0	2.388	2.370	2.324	2.227	2.066	2.037	0.701	0.000	0.000	0.000	0.000	0.000	0.000	0.000	0.000	0.000	0.000	0.000	0.000	0.000	0.000	120	585	1396	1220	1.256	Error	Error	984	412	0	0	858	362	0	0	0	0
3	15	5	"TES1"	"YJR019C"	13780	15000	110	1085	909	435	77	86	84	90	81	0	828	716	349	277	290	99	80	77	0	0	0	0	0	0	0	0	0	0	0	0	0	0	0	0	0	0	0	1.829	1.895	1.782	1.577	2.094	1.668	0.765	0.000	0.000	0.000	0.000	0.000	0.000	0.000	0.000	0.000	0.000	0.000	0.000	0.000	0.000	80	494	1559	1271	0.871	Error	Error	1008	551	0	0	832	439	0	0	0	0
3	16	5	"osm1"	"YJR051W"	13970	15010	120	2930	2513	1258	74	84	79	93	90	0	1320	1210	619	282	295	107	81	80	0	0	0	0	0	0	0	0	0	0	0	0	0	0	0	0	0	0	0	2.751	2.628	2.543	2.752	1.882	2.467	0.852	0.000	0.000	0.000	0.000	0.000	0.000	0.000	0.000	0.000	0.000	0.000	0.000	0.000	0.000	120	566	3894	3367	1.460	Error	Error	2856	1038	0	0	2439	928	0	0	0	0
3	17	5	""	"YJR084W"	14150	15000	110	1931	1583	819	77	89	133	83	80	0	1089	965	478	273	293	117	80	76	0	0	0	0	0	0	0	0	0	0	0	0	0	0	0	0	0	0	0	2.272	2.176	2.048	2.054	1.752	2.227	0.792	0.000	0.000	0.000	0.000	0.000	0.000	0.000	0.000	0.000	0.000	0.000	0.000	0.000	0.000	80	499	2670	2198	1.184	Error	Error	1854	816	0	0	1506	692	0	0	0	0
3	18	5	"rec107"	"YJR021C"	14340	15000	110	1631	1427	760	77	98	159	83	81	0	985	871	436	276	302	133	78	77	0	0	0	0	0	0	0	0	0	0	0	0	0	0	0	0	0	0	0	2.192	2.269	2.155	1.920	2.022	2.115	0.829	0.000	0.000	0.000	0.000	0.000	0.000	0.000	0.000	0.000	0.000	0.000	0.000	0.000	0.000	80	485	2263	1945	1.132	Error	Error	1554	709	0	0	1350	595	0	0	0	0
3	19	5	"BFA1"	"YJR053W"	14530	15010	120	1543	1371	669	73	83	87	91	86	0	859	782	366	275	289	95	81	76	0	0	0	0	0	0	0	0	0	0	0	0	0	0	0	0	0	0	0	2.517	2.560	2.520	2.614	2.489	2.436	0.775	0.000	0.000	0.000	0.000	0.000	0.000	0.000	0.000	0.000	0.000	0.000	0.000	0.000	0.000	120	542	2054	1805	1.332	Error	Error	1470	584	0	0	1298	507	0	0	0	0
3	20	5	"ste18"	"YJR086W"	14720	15000	110	1126	961	510	72	82	84	81	80	0	813	721	370	275	290	106	77	75	0	0	0	0	0	0	0	0	0	0	0	0	0	0	0	0	0	0	0	1.959	1.993	1.816	1.685	2.491	1.821	0.778	0.000	0.000	0.000	0.000	0.000	0.000	0.000	0.000	0.000	0.000	0.000	0.000	0.000	0.000	80	480	1592	1335	0.970	Error	Error	1054	538	0	0	889	446	0	0	0	0
3	21	5	""	"YKR007W"	14910	15000	110	2198	1787	915	74	91	116	90	82	0	2501	2156	1097	282	318	218	81	78	0	0	0	0	0	0	0	0	0	0	0	0	0	0	0	0	0	0	0	0.957	0.914	0.915	0.883	1.882	0.887	0.900	0.000	0.000	0.000	0.000	0.000	0.000	0.000	0.000	0.000	0.000	0.000	0.000	0.000	0.000	80	498	4343	3587	-0.063	Error	Error	2124	2219	0	0	1713	1874	0	0	0	0
3	22	5	""	"YKR038C"	15110	15010	120	1997	1716	775	74	83	86	96	94	0	886	817	352	276	300	193	80	73	0	0	0	0	0	0	0	0	0	0	0	0	0	0	0	0	0	0	0	3.152	3.035	2.878	3.123	1.670	2.888	0.815	0.000	0.000	0.000	0.000	0.000	0.000	0.000	0.000	0.000	0.000	0.000	0.000	0.000	0.000	120	594	2533	2183	1.656	Error	Error	1923	610	0	0	1642	541	0	0	0	0
3	1	6	""	"YKR070W"	11110	15190	110	1557	1337	689	79	90	89	98	91	0	5785	4859	2639	297	379	639	85	76	0	0	0	0	0	0	0	0	0	0	0	0	0	0	0	0	0	0	0	0.269	0.276	0.284	0.304	1.506	0.257	0.858	0.000	0.000	0.000	0.000	0.000	0.000	0.000	0.000	0.000	0.000	0.000	0.000	0.000	0.000	80	513	6966	5820	-1.893	Error	Error	1478	5488	0	0	1258	4562	0	0	0	0
3	2	6	"FOX2"	"YKR009C"	11300	15190	120	1586	1705	810	80	96	118	100	99	0	6566	6566	3214	289	380	653	98	94	0	0	0	0	0	0	0	0	0	0	0	0	0	0	0	0	0	0	0	0.240	0.259	0.249	0.263	1.417	0.239	0.897	0.000	0.000	0.000	0.000	0.000	0.000	0.000	0.000	0.000	0.000	0.000	0.000	0.000	0.000	120	568	7783	7902	-2.059	Error	Error	1506	6277	0	0	1625	6277	0	0	0	0
3	3	6	""	"YKR040C"	11480	15190	110	685	599	312	79	105	200	77	70	0	632	563	273	285	312	254	63	18	0	0	0	0	0	0	0	0	0	0	0	0	0	0	0	0	0	0	0	1.746	1.871	1.515	1.365	2.688	1.554	0.654	0.000	0.000	0.000	0.000	0.000	0.000	0.000	0.000	0.000	0.000	0.000	0.000	0.000	0.000	80	481	953	798	0.804	Error	Error	606	347	0	0	520	278	0	0	0	0
3	4	6	"sis2"	"YKR072C"	11680	15190	120	3430	3273	1542	82	118	337	99	93	0	2114	2066	887	285	323	323	94	86	0	0	0	0	0	0	0	0	0	0	0	0	0	0	0	0	0	0	0	1.831	1.792	1.728	1.763	1.566	1.811	0.859	0.000	0.000	0.000	0.000	0.000	0.000	0.000	0.000	0.000	0.000	0.000	0.000	0.000	0.000	120	566	5177	4972	0.872	Error	Error	3348	1829	0	0	3191	1781	0	0	0	0
3	5	6	""	"YKR011C"	11860	15190	110	1557	1328	659	85	91	69	95	87	0	914	831	378	284	290	92	80	76	0	0	0	0	0	0	0	0	0	0	0	0	0	0	0	0	0	0	0	2.337	2.272	2.316	2.239	2.054	2.125	0.819	0.000	0.000	0.000	0.000	0.000	0.000	0.000	0.000	0.000	0.000	0.000	0.000	0.000	0.000	80	502	2102	1790	1.224	Error	Error	1472	630	0	0	1243	547	0	0	0	0
3	6	6	"UTH1"	"YKR042W"	12050	15190	110	1714	1471	671	80	95	117	96	88	0	2100	1938	801	284	308	204	93	87	0	0	0	0	0	0	0	0	0	0	0	0	0	0	0	0	0	0	0	0.900	0.841	0.877	0.803	1.529	0.835	0.872	0.000	0.000	0.000	0.000	0.000	0.000	0.000	0.000	0.000	0.000	0.000	0.000	0.000	0.000	80	530	3450	3045	-0.152	Error	Error	1634	1816	0	0	1391	1654	0	0	0	0
3	7	6	""	"YKR074W"	12250	15190	120	703	621	285	77	89	100	85	82	0	870	779	324	283	304	193	79	70	0	0	0	0	0	0	0	0	0	0	0	0	0	0	0	0	0	0	0	1.066	1.097	1.015	1.049	1.704	1.011	0.779	0.000	0.000	0.000	0.000	0.000	0.000	0.000	0.000	0.000	0.000	0.000	0.000	0.000	0.000	120	575	1213	1040	0.093	Error	Error	626	587	0	0	544	496	0	0	0	0
3	8	6	"PRY2"	"YKR013W"	12430	15190	110	1652	1397	708	80	99	131	87	82	0	1422	1210	595	286	309	181	80	78	0	0	0	0	0	0	0	0	0	0	0	0	0	0	0	0	0	0	0	1.384	1.425	1.472	1.357	1.545	1.366	0.828	0.000	0.000	0.000	0.000	0.000	0.000	0.000	0.000	0.000	0.000	0.000	0.000	0.000	0.000	80	470	2708	2241	0.469	Error	Error	1572	1136	0	0	1317	924	0	0	0	0
3	9	6	""	"YKR044W"	12620	15190	110	2784	2426	1223	80	118	216	91	82	0	4872	4339	2193	293	377	486	86	81	0	0	0	0	0	0	0	0	0	0	0	0	0	0	0	0	0	0	0	0.591	0.580	0.594	0.626	1.560	0.551	0.911	0.000	0.000	0.000	0.000	0.000	0.000	0.000	0.000	0.000	0.000	0.000	0.000	0.000	0.000	80	493	7283	6392	-0.760	Error	Error	2704	4579	0	0	2346	4046	0	0	0	0
3	10	6	"ECM4"	"YKR076W"	12820	15200	120	2250	1901	857	79	100	173	94	88	0	1099	1020	475	287	346	450	75	42	0	0	0	0	0	0	0	0	0	0	0	0	0	0	0	0	0	0	0	2.674	2.486	2.374	2.462	1.541	2.387	0.784	0.000	0.000	0.000	0.000	0.000	0.000	0.000	0.000	0.000	0.000	0.000	0.000	0.000	0.000	120	521	2983	2555	1.419	Error	Error	2171	812	0	0	1822	733	0	0	0	0
3	11	6	"CRR1"	"YLR213C"	12990	15190	110	2436	2176	958	82	131	297	97	91	0	1196	1088	456	277	305	166	85	78	0	0	0	0	0	0	0	0	0	0	0	0	0	0	0	0	0	0	0	2.561	2.582	2.511	2.617	1.588	2.523	0.866	0.000	0.000	0.000	0.000	0.000	0.000	0.000	0.000	0.000	0.000	0.000	0.000	0.000	0.000	80	488	3273	2905	1.357	Error	Error	2354	919	0	0	2094	811	0	0	0	0
3	12	6	""	"YLR243W"	13200	15190	120	221	220	87	80	128	286	2	0	0	539	519	241	277	308	161	67	40	0	0	0	0	0	0	0	0	0	0	0	0	0	0	0	0	0	0	0	0.538	0.579	0.526	0.504	2.526	0.360	0.516	0.000	0.000	0.000	0.000	0.000	0.000	0.000	0.000	0.000	0.000	0.000	0.000	0.000	0.000	120	529	403	382	-0.894	Error	Error	141	262	0	0	140	242	0	0	0	0
3	13	6	"PIG1"	"YLR273C"	13370	15190	110	1310	1467	1116	84	119	212	82	80	0	630	649	371	281	306	129	75	61	0	0	0	0	0	0	0	0	0	0	0	0	0	0	0	0	0	0	0	3.513	3.758	3.365	3.545	1.892	3.536	0.735	0.000	0.000	0.000	0.000	0.000	0.000	0.000	0.000	0.000	0.000	0.000	0.000	0.000	0.000	80	494	1575	1751	1.813	Error	Error	1226	349	0	0	1383	368	0	0	0	0
3	14	6	""	"YLR215C"	13570	15190	110	1691	1644	722	82	113	192	97	92	0	1903	1853	797	283	307	160	93	87	0	0	0	0	0	0	0	0	0	0	0	0	0	0	0	0	0	0	0	0.993	0.995	1.056	1.074	1.501	0.923	0.857	0.000	0.000	0.000	0.000	0.000	0.000	0.000	0.000	0.000	0.000	0.000	0.000	0.000	0.000	80	508	3229	3132	-0.010	Error	Error	1609	1620	0	0	1562	1570	0	0	0	0
3	15	6	"CDD1"	"YLR245C"	13760	15190	110	509	452	254	80	87	62	81	73	0	638	576	307	279	293	135	70	65	0	0	0	0	0	0	0	0	0	0	0	0	0	0	0	0	0	0	0	1.195	1.253	0.998	0.921	2.113	1.034	0.663	0.000	0.000	0.000	0.000	0.000	0.000	0.000	0.000	0.000	0.000	0.000	0.000	0.000	0.000	80	538	788	669	0.257	Error	Error	429	359	0	0	372	297	0	0	0	0
3	16	6	"SMD2"	"YLR275W"	13960	15190	110	994	835	465	78	81	32	91	85	0	4740	3838	2156	283	300	139	91	87	0	0	0	0	0	0	0	0	0	0	0	0	0	0	0	0	0	0	0	0.206	0.213	0.206	0.202	1.583	0.201	0.872	0.000	0.000	0.000	0.000	0.000	0.000	0.000	0.000	0.000	0.000	0.000	0.000	0.000	0.000	80	479	5373	4312	-2.283	Error	Error	916	4457	0	0	757	3555	0	0	0	0
3	17	6	""	"YLR217W"	14130	15190	110	1095	934	486	79	93	114	85	80	0	658	595	290	280	301	147	75	67	0	0	0	0	0	0	0	0	0	0	0	0	0	0	0	0	0	0	0	2.688	2.714	2.343	1.927	2.711	2.294	0.637	0.000	0.000	0.000	0.000	0.000	0.000	0.000	0.000	0.000	0.000	0.000	0.000	0.000	0.000	80	523	1394	1170	1.426	Error	Error	1016	378	0	0	855	315	0	0	0	0
3	18	6	""	"YLR247C"	14340	15190	110	391	447	263	78	95	109	86	71	0	582	573	311	278	290	100	73	63	0	0	0	0	0	0	0	0	0	0	0	0	0	0	0	0	0	0	0	1.030	1.251	1.009	1.051	2.569	0.930	0.552	0.000	0.000	0.000	0.000	0.000	0.000	0.000	0.000	0.000	0.000	0.000	0.000	0.000	0.000	80	544	617	664	0.042	Error	Error	313	304	0	0	369	295	0	0	0	0
3	19	6	"YSH1"	"YLR277C"	14530	15190	110	1076	1276	945	78	85	47	86	81	0	888	912	577	275	286	94	77	75	0	0	0	0	0	0	0	0	0	0	0	0	0	0	0	0	0	0	0	1.628	1.881	1.699	1.466	2.393	1.773	0.824	0.000	0.000	0.000	0.000	0.000	0.000	0.000	0.000	0.000	0.000	0.000	0.000	0.000	0.000	80	494	1611	1835	0.703	Error	Error	998	613	0	0	1198	637	0	0	0	0
3	20	6	""	"YLR219W"	14720	15190	110	2510	2409	1131	78	114	228	96	92	0	1396	1350	628	278	310	187	87	85	0	0	0	0	0	0	0	0	0	0	0	0	0	0	0	0	0	0	0	2.175	2.174	2.177	2.354	1.551	2.099	0.847	0.000	0.000	0.000	0.000	0.000	0.000	0.000	0.000	0.000	0.000	0.000	0.000	0.000	0.000	80	539	3550	3403	1.121	Error	Error	2432	1118	0	0	2331	1072	0	0	0	0
3	21	6	"yef3"	"YLR249W"	14910	15190	110	1200	1323	889	78	124	255	85	78	0	1230	1289	809	281	327	241	78	72	0	0	0	0	0	0	0	0	0	0	0	0	0	0	0	0	0	0	0	1.182	1.235	1.210	1.233	1.792	1.151	0.803	0.000	0.000	0.000	0.000	0.000	0.000	0.000	0.000	0.000	0.000	0.000	0.000	0.000	0.000	80	548	2071	2253	0.242	Error	Error	1122	949	0	0	1245	1008	0	0	0	0
3	22	6	""	"YLR279W"	15120	15190	120	192	184	78	77	89	110	51	8	0	413	393	152	275	288	123	55	18	0	0	0	0	0	0	0	0	0	0	0	0	0	0	0	0	0	0	0	0.833	0.907	0.682	0.648	2.788	0.441	0.342	0.000	0.000	0.000	0.000	0.000	0.000	0.000	0.000	0.000	0.000	0.000	0.000	0.000	0.000	120	634	253	225	-0.263	Error	Error	115	138	0	0	107	118	0	0	0	0
3	1	7	"BUL2"	"YML111W"	11120	15370	120	2867	2763	1259	76	85	76	99	99	0	1801	1734	772	284	328	474	82	74	0	0	0	0	0	0	0	0	0	0	0	0	0	0	0	0	0	0	0	1.840	1.853	1.769	2.044	1.772	1.725	0.674	0.000	0.000	0.000	0.000	0.000	0.000	0.000	0.000	0.000	0.000	0.000	0.000	0.000	0.000	120	634	4308	4137	0.880	Error	Error	2791	1517	0	0	2687	1450	0	0	0	0
3	2	7	""	"YMR009W"	11310	15380	110	1072	913	520	77	88	79	85	78	0	676	589	308	279	288	87	75	73	0	0	0	0	0	0	0	0	0	0	0	0	0	0	0	0	0	0	0	2.506	2.697	2.317	1.915	2.704	2.367	0.723	0.000	0.000	0.000	0.000	0.000	0.000	0.000	0.000	0.000	0.000	0.000	0.000	0.000	0.000	80	487	1392	1146	1.326	Error	Error	995	397	0	0	836	310	0	0	0	0
3	3	7	""	"YMR040W"	11510	15380	120	867	794	380	76	91	102	89	83	0	796	712	322	276	294	99	80	76	0	0	0	0	0	0	0	0	0	0	0	0	0	0	0	0	0	0	0	1.521	1.647	1.545	1.484	2.073	1.519	0.762	0.000	0.000	0.000	0.000	0.000	0.000	0.000	0.000	0.000	0.000	0.000	0.000	0.000	0.000	120	582	1311	1154	0.605	Error	Error	791	520	0	0	718	436	0	0	0	0
3	4	7	"DAT1"	"YML113W"	11690	15380	110	2448	1963	1032	79	105	218	86	81	0	1108	1005	527	277	296	136	77	73	0	0	0	0	0	0	0	0	0	0	0	0	0	0	0	0	0	0	0	2.851	2.588	2.648	2.855	1.742	2.553	0.799	0.000	0.000	0.000	0.000	0.000	0.000	0.000	0.000	0.000	0.000	0.000	0.000	0.000	0.000	80	485	3200	2612	1.511	Error	Error	2369	831	0	0	1884	728	0	0	0	0
3	5	7	"HXT2"	"YMR011W"	11900	15390	120	3827	3187	1571	80	106	208	99	90	0	2986	2690	1320	279	295	138	91	90	0	0	0	0	0	0	0	0	0	0	0	0	0	0	0	0	0	0	0	1.384	1.289	1.279	1.422	1.795	1.312	0.864	0.000	0.000	0.000	0.000	0.000	0.000	0.000	0.000	0.000	0.000	0.000	0.000	0.000	0.000	120	578	6454	5518	0.469	Error	Error	3747	2707	0	0	3107	2411	0	0	0	0
3	6	7	"arg80"	"YMR042W"	12070	15380	110	911	761	410	76	99	141	82	72	0	654	609	348	278	301	198	68	47	0	0	0	0	0	0	0	0	0	0	0	0	0	0	0	0	0	0	0	2.221	2.069	1.701	1.593	2.639	1.698	0.676	0.000	0.000	0.000	0.000	0.000	0.000	0.000	0.000	0.000	0.000	0.000	0.000	0.000	0.000	80	478	1211	1016	1.151	Error	Error	835	376	0	0	685	331	0	0	0	0
3	7	7	"van1"	"YML115C"	12270	15390	120	2269	1947	898	78	92	97	99	96	0	3278	2835	1287	276	289	100	96	96	0	0	0	0	0	0	0	0	0	0	0	0	0	0	0	0	0	0	0	0.730	0.730	0.746	0.750	1.538	0.695	0.861	0.000	0.000	0.000	0.000	0.000	0.000	0.000	0.000	0.000	0.000	0.000	0.000	0.000	0.000	120	558	5193	4428	-0.454	Error	Error	2191	3002	0	0	1869	2559	0	0	0	0
3	8	7	"sec59"	"YMR013C"	12450	15380	110	1914	1641	820	79	104	170	95	87	0	3695	3559	1669	289	359	441	97	87	0	0	0	0	0	0	0	0	0	0	0	0	0	0	0	0	0	0	0	0.539	0.478	0.478	0.449	1.434	0.467	0.872	0.000	0.000	0.000	0.000	0.000	0.000	0.000	0.000	0.000	0.000	0.000	0.000	0.000	0.000	80	490	5241	4832	-0.892	Error	Error	1835	3406	0	0	1562	3270	0	0	0	0
3	9	7	""	"YMR044W"	12650	15390	120	2692	2367	1093	76	104	201	96	88	0	7133	6369	3004	290	371	506	95	90	0	0	0	0	0	0	0	0	0	0	0	0	0	0	0	0	0	0	0	0.382	0.377	0.374	0.394	1.745	0.352	0.886	0.000	0.000	0.000	0.000	0.000	0.000	0.000	0.000	0.000	0.000	0.000	0.000	0.000	0.000	120	582	9459	8370	-1.387	Error	Error	2616	6843	0	0	2291	6079	0	0	0	0
3	10	7	""	"YML117W"	12850	15390	120	2003	2151	1233	75	77	28	100	100	0	1512	1518	734	281	284	71	92	90	0	0	0	0	0	0	0	0	0	0	0	0	0	0	0	0	0	0	0	1.566	1.678	1.699	1.740	1.703	1.757	0.858	0.000	0.000	0.000	0.000	0.000	0.000	0.000	0.000	0.000	0.000	0.000	0.000	0.000	0.000	120	515	3159	3313	0.647	Error	Error	1928	1231	0	0	2076	1237	0	0	0	0
3	11	7	"ERG5"	"YMR015C"	13040	15390	120	2212	1883	863	77	97	172	96	90	0	6588	5676	2548	279	291	101	98	98	0	0	0	0	0	0	0	0	0	0	0	0	0	0	0	0	0	0	0	0.338	0.335	0.346	0.344	1.631	0.329	0.893	0.000	0.000	0.000	0.000	0.000	0.000	0.000	0.000	0.000	0.000	0.000	0.000	0.000	0.000	120	524	8444	7203	-1.563	Error	Error	2135	6309	0	0	1806	5397	0	0	0	0
3	12	7	""	"YMR046C"	13220	15390	120	22691	20688	11089	82	93	50	100	100	0	9336	8290	4492	278	288	77	97	97	0	0	0	0	0	0	0	0	0	0	0	0	0	0	0	0	0	0	0	2.496	2.572	2.391	2.545	1.896	2.612	0.887	0.000	0.000	0.000	0.000	0.000	0.000	0.000	0.000	0.000	0.000	0.000	0.000	0.000	0.000	120	514	31667	28618	1.320	Error	Error	22609	9058	0	0	20606	8012	0	0	0	0
3	13	7	"PBI2"	"YNL015W"	13420	15390	120	235	228	101	84	102	116	65	21	0	538	497	223	276	289	93	75	61	0	0	0	0	0	0	0	0	0	0	0	0	0	0	0	0	0	0	0	0.576	0.652	0.560	0.539	2.569	0.410	0.421	0.000	0.000	0.000	0.000	0.000	0.000	0.000	0.000	0.000	0.000	0.000	0.000	0.000	0.000	120	556	413	365	-0.795	Error	Error	151	262	0	0	144	221	0	0	0	0
3	14	7	""	"YNL047C"	13610	15390	120	1738	1602	831	77	81	51	95	92	0	2184	2010	1093	269	280	122	87	83	0	0	0	0	0	0	0	0	0	0	0	0	0	0	0	0	0	0	0	0.867	0.876	0.858	0.879	1.669	0.818	0.869	0.000	0.000	0.000	0.000	0.000	0.000	0.000	0.000	0.000	0.000	0.000	0.000	0.000	0.000	120	539	3576	3266	-0.205	Error	Error	1661	1915	0	0	1525	1741	0	0	0	0
3	15	7	""	"YNL078W"	13800	15390	120	1907	1725	901	76	80	32	95	95	0	739	682	355	270	276	73	77	73	0	0	0	0	0	0	0	0	0	0	0	0	0	0	0	0	0	0	0	3.904	4.002	3.788	3.957	2.129	3.567	0.754	0.000	0.000	0.000	0.000	0.000	0.000	0.000	0.000	0.000	0.000	0.000	0.000	0.000	0.000	120	539	2300	2061	1.965	Error	Error	1831	469	0	0	1649	412	0	0	0	0
3	16	7	""	"YNL017C"	13990	15390	120	1047	975	526	79	82	31	93	93	0	983	914	479	273	287	123	77	75	0	0	0	0	0	0	0	0	0	0	0	0	0	0	0	0	0	0	0	1.363	1.398	1.315	1.357	2.010	1.266	0.845	0.000	0.000	0.000	0.000	0.000	0.000	0.000	0.000	0.000	0.000	0.000	0.000	0.000	0.000	120	535	1678	1537	0.447	Error	Error	968	710	0	0	896	641	0	0	0	0
3	17	7	"SFB2"	"YNL049C"	14180	15390	120	1893	2026	1286	80	86	57	100	99	0	1323	1429	792	272	277	79	89	85	0	0	0	0	0	0	0	0	0	0	0	0	0	0	0	0	0	0	0	1.725	1.682	1.763	1.866	2.086	1.722	0.855	0.000	0.000	0.000	0.000	0.000	0.000	0.000	0.000	0.000	0.000	0.000	0.000	0.000	0.000	120	542	2864	3103	0.787	Error	Error	1813	1051	0	0	1946	1157	0	0	0	0
3	18	7	""	"YNL080C"	14370	15390	120	1773	1499	712	81	86	35	100	97	0	1723	1530	738	273	279	82	89	87	0	0	0	0	0	0	0	0	0	0	0	0	0	0	0	0	0	0	0	1.167	1.128	1.095	1.206	1.846	1.040	0.878	0.000	0.000	0.000	0.000	0.000	0.000	0.000	0.000	0.000	0.000	0.000	0.000	0.000	0.000	120	537	3142	2675	0.223	Error	Error	1692	1450	0	0	1418	1257	0	0	0	0
3	19	7	""	"YNL019C"	14560	15390	120	3547	3095	1579	80	86	39	100	98	0	1610	1438	736	273	278	79	87	85	0	0	0	0	0	0	0	0	0	0	0	0	0	0	0	0	0	0	0	2.593	2.588	2.432	2.777	1.707	2.492	0.863	0.000	0.000	0.000	0.000	0.000	0.000	0.000	0.000	0.000	0.000	0.000	0.000	0.000	0.000	120	543	4804	4180	1.375	Error	Error	3467	1337	0	0	3015	1165	0	0	0	0
3	20	7	""	"YNL051W"	14740	15390	110	1685	1406	669	82	103	156	91	83	0	4961	4363	2104	278	357	508	92	83	0	0	0	0	0	0	0	0	0	0	0	0	0	0	0	0	0	0	0	0.342	0.324	0.331	0.306	1.512	0.300	0.875	0.000	0.000	0.000	0.000	0.000	0.000	0.000	0.000	0.000	0.000	0.000	0.000	0.000	0.000	80	499	6286	5409	-1.547	Error	Error	1603	4683	0	0	1324	4085	0	0	0	0
3	21	7	"pms1"	"YNL082W"	14940	15390	110	1828	1771	989	79	95	112	100	96	0	4690	5060	2504	278	355	494	98	95	0	0	0	0	0	0	0	0	0	0	0	0	0	0	0	0	0	0	0	0.396	0.354	0.359	0.341	1.402	0.340	0.855	0.000	0.000	0.000	0.000	0.000	0.000	0.000	0.000	0.000	0.000	0.000	0.000	0.000	0.000	80	533	6161	6474	-1.335	Error	Error	1749	4412	0	0	1692	4782	0	0	0	0
3	22	7	"HDA1"	"YNL021W"	15130	15390	110	2144	1855	983	79	86	73	95	92	0	1501	1364	727	271	301	283	76	75	0	0	0	0	0	0	0	0	0	0	0	0	0	0	0	0	0	0	0	1.679	1.625	1.496	1.642	1.479	1.545	0.833	0.000	0.000	0.000	0.000	0.000	0.000	0.000	0.000	0.000	0.000	0.000	0.000	0.000	0.000	80	531	3295	2869	0.747	Error	Error	2065	1230	0	0	1776	1093	0	0	0	0
3	1	8	"MSG5"	"YNL053W"	11150	15580	130	1929	1767	1176	74	81	61	92	85	0	1540	1649	2625	279	289	104	77	74	0	0	0	0	0	0	0	0	0	0	0	0	0	0	0	0	0	0	0	1.471	1.236	1.557	1.612	2.253	0.298	0.179	0.000	0.000	0.000	0.000	0.000	0.000	0.000	0.000	0.000	0.000	0.000	0.000	0.000	0.000	120	662	3116	3063	0.557	Error	Error	1855	1261	0	0	1693	1370	0	0	0	0
3	2	8	"END3"	"YNL084C"	11330	15580	120	1443	1410	877	77	85	72	94	86	0	4072	4020	2874	275	283	79	92	89	0	0	0	0	0	0	0	0	0	0	0	0	0	0	0	0	0	0	0	0.360	0.356	0.361	0.411	2.106	0.316	0.886	0.000	0.000	0.000	0.000	0.000	0.000	0.000	0.000	0.000	0.000	0.000	0.000	0.000	0.000	120	532	5163	5078	-1.475	Error	Error	1366	3797	0	0	1333	3745	0	0	0	0
3	3	8	"BIO5"	"YNR056C"	11520	15570	110	2404	2300	1343	81	91	112	95	88	0	1427	1333	728	282	296	124	78	77	0	0	0	0	0	0	0	0	0	0	0	0	0	0	0	0	0	0	0	2.029	2.111	2.018	2.420	2.128	2.066	0.858	0.000	0.000	0.000	0.000	0.000	0.000	0.000	0.000	0.000	0.000	0.000	0.000	0.000	0.000	80	494	3468	3270	1.021	Error	Error	2323	1145	0	0	2219	1051	0	0	0	0
3	4	8	"PLB3"	"YOL011W"	11720	15580	120	1613	1729	946	80	101	198	94	85	0	1756	1603	817	281	300	144	85	81	0	0	0	0	0	0	0	0	0	0	0	0	0	0	0	0	0	0	0	1.039	1.247	1.281	1.326	1.742	1.233	0.882	0.000	0.000	0.000	0.000	0.000	0.000	0.000	0.000	0.000	0.000	0.000	0.000	0.000	0.000	120	565	3008	2971	0.056	Error	Error	1533	1475	0	0	1649	1322	0	0	0	0
3	5	8	""	"YOL042W"	11910	15580	120	2113	1835	883	79	82	33	100	98	0	4779	4159	2037	280	286	88	95	95	0	0	0	0	0	0	0	0	0	0	0	0	0	0	0	0	0	0	0	0.452	0.453	0.476	0.482	1.702	0.442	0.887	0.000	0.000	0.000	0.000	0.000	0.000	0.000	0.000	0.000	0.000	0.000	0.000	0.000	0.000	120	498	6533	5635	-1.145	Error	Error	2034	4499	0	0	1756	3879	0	0	0	0
3	6	8	"BIO3"	"YNR058W"	12080	15570	110	1549	1323	771	79	107	156	82	76	0	1178	1027	573	280	305	157	75	72	0	0	0	0	0	0	0	0	0	0	0	0	0	0	0	0	0	0	0	1.637	1.665	1.589	1.699	1.921	1.544	0.809	0.000	0.000	0.000	0.000	0.000	0.000	0.000	0.000	0.000	0.000	0.000	0.000	0.000	0.000	80	490	2368	1991	0.711	Error	Error	1470	898	0	0	1244	747	0	0	0	0
3	7	8	"HRD1"	"YOL013C"	12290	15580	120	2801	2425	1350	76	99	146	97	90	0	4027	3558	1763	280	304	170	97	94	0	0	0	0	0	0	0	0	0	0	0	0	0	0	0	0	0	0	0	0.727	0.717	0.738	0.689	1.753	0.734	0.890	0.000	0.000	0.000	0.000	0.000	0.000	0.000	0.000	0.000	0.000	0.000	0.000	0.000	0.000	120	541	6472	5627	-0.459	Error	Error	2725	3747	0	0	2349	3278	0	0	0	0
3	8	8	"PEX15"	"YOL044W"	12470	15580	120	944	872	481	76	90	136	86	79	0	2446	2321	1392	283	318	304	81	78	0	0	0	0	0	0	0	0	0	0	0	0	0	0	0	0	0	0	0	0.401	0.391	0.398	0.409	1.764	0.352	0.881	0.000	0.000	0.000	0.000	0.000	0.000	0.000	0.000	0.000	0.000	0.000	0.000	0.000	0.000	120	511	3031	2834	-1.317	Error	Error	868	2163	0	0	796	2038	0	0	0	0
3	9	8	"FRE4"	"YNR060W"	12660	15580	120	1338	1379	731	79	85	50	98	97	0	1990	1930	1003	287	299	96	93	90	0	0	0	0	0	0	0	0	0	0	0	0	0	0	0	0	0	0	0	0.739	0.791	0.813	0.821	1.576	0.739	0.853	0.000	0.000	0.000	0.000	0.000	0.000	0.000	0.000	0.000	0.000	0.000	0.000	0.000	0.000	120	505	2962	2943	-0.436	Error	Error	1259	1703	0	0	1300	1643	0	0	0	0
3	10	8	""	"YOL014W"	12850	15580	120	367	333	151	76	80	35	88	84	0	736	681	315	282	291	75	80	78	0	0	0	0	0	0	0	0	0	0	0	0	0	0	0	0	0	0	0	0.641	0.644	0.620	0.569	1.878	0.508	0.705	0.000	0.000	0.000	0.000	0.000	0.000	0.000	0.000	0.000	0.000	0.000	0.000	0.000	0.000	120	491	745	656	-0.642	Error	Error	291	454	0	0	257	399	0	0	0	0
3	11	8	""	"YOL046C"	13030	15580	120	1216	1121	560	76	79	33	98	95	0	755	712	344	281	288	71	78	77	0	0	0	0	0	0	0	0	0	0	0	0	0	0	0	0	0	0	0	2.405	2.425	2.243	2.476	1.822	2.203	0.740	0.000	0.000	0.000	0.000	0.000	0.000	0.000	0.000	0.000	0.000	0.000	0.000	0.000	0.000	120	492	1614	1476	1.266	Error	Error	1140	474	0	0	1045	431	0	0	0	0
3	12	8	""	"YNR062C"	13230	15580	120	1159	1085	586	79	82	37	93	90	0	929	847	425	278	284	75	80	80	0	0	0	0	0	0	0	0	0	0	0	0	0	0	0	0	0	0	0	1.659	1.768	1.654	1.547	2.251	1.660	0.811	0.000	0.000	0.000	0.000	0.000	0.000	0.000	0.000	0.000	0.000	0.000	0.000	0.000	0.000	120	513	1731	1575	0.730	Error	Error	1080	651	0	0	1006	569	0	0	0	0
3	13	8	"CMK2"	"YOL016C"	13420	15580	120	961	958	617	80	82	31	93	90	0	1823	1631	1003	271	278	78	80	77	0	0	0	0	0	0	0	0	0	0	0	0	0	0	0	0	0	0	0	0.568	0.646	0.606	0.596	2.025	0.615	0.868	0.000	0.000	0.000	0.000	0.000	0.000	0.000	0.000	0.000	0.000	0.000	0.000	0.000	0.000	120	478	2433	2238	-0.817	Error	Error	881	1552	0	0	878	1360	0	0	0	0
3	14	8	""	"YOL048C"	13600	15580	120	1152	991	532	79	86	62	90	87	0	3219	2608	1544	271	282	107	83	80	0	0	0	0	0	0	0	0	0	0	0	0	0	0	0	0	0	0	0	0.364	0.390	0.370	0.407	2.132	0.345	0.861	0.000	0.000	0.000	0.000	0.000	0.000	0.000	0.000	0.000	0.000	0.000	0.000	0.000	0.000	120	506	4021	3249	-1.458	Error	Error	1073	2948	0	0	912	2337	0	0	0	0
3	15	8	"spr1"	"YOR190W"	13800	15580	120	2290	1965	974	77	81	31	99	98	0	1672	1416	649	276	281	77	87	86	0	0	0	0	0	0	0	0	0	0	0	0	0	0	0	0	0	0	0	1.585	1.656	1.671	1.653	1.606	1.654	0.863	0.000	0.000	0.000	0.000	0.000	0.000	0.000	0.000	0.000	0.000	0.000	0.000	0.000	0.000	120	514	3609	3028	0.665	Error	Error	2213	1396	0	0	1888	1140	0	0	0	0
3	16	8	""	"YOR220W"	13990	15580	120	1979	1646	830	79	83	31	97	97	0	1456	1275	632	278	283	73	86	83	0	0	0	0	0	0	0	0	0	0	0	0	0	0	0	0	0	0	0	1.613	1.572	1.564	1.576	1.855	1.519	0.869	0.000	0.000	0.000	0.000	0.000	0.000	0.000	0.000	0.000	0.000	0.000	0.000	0.000	0.000	120	485	3078	2564	0.690	Error	Error	1900	1178	0	0	1567	997	0	0	0	0
3	17	8	""	"YOR252W"	14180	15580	120	1604	1336	663	81	84	31	95	93	0	1586	1412	738	279	281	72	85	82	0	0	0	0	0	0	0	0	0	0	0	0	0	0	0	0	0	0	0	1.165	1.108	1.088	1.128	2.114	1.028	0.831	0.000	0.000	0.000	0.000	0.000	0.000	0.000	0.000	0.000	0.000	0.000	0.000	0.000	0.000	120	434	2830	2388	0.221	Error	Error	1523	1307	0	0	1255	1133	0	0	0	0
3	18	8	""	"YOR192C"	14360	15580	120	3857	3581	1874	83	87	34	100	100	0	3787	3237	1784	274	278	77	94	90	0	0	0	0	0	0	0	0	0	0	0	0	0	0	0	0	0	0	0	1.074	1.181	1.182	1.328	1.852	1.123	0.885	0.000	0.000	0.000	0.000	0.000	0.000	0.000	0.000	0.000	0.000	0.000	0.000	0.000	0.000	120	440	7287	6461	0.103	Error	Error	3774	3513	0	0	3498	2963	0	0	0	0
3	19	8	""	"YOR222W"	14550	15580	120	1962	1648	837	81	87	35	98	95	0	1216	1068	499	275	276	73	84	83	0	0	0	0	0	0	0	0	0	0	0	0	0	0	0	0	0	0	0	1.999	1.976	1.938	1.994	1.567	1.916	0.823	0.000	0.000	0.000	0.000	0.000	0.000	0.000	0.000	0.000	0.000	0.000	0.000	0.000	0.000	120	456	2822	2360	0.999	Error	Error	1881	941	0	0	1567	793	0	0	0	0
3	20	8	"SEC63"	"YOR254C"	14740	15580	120	670	672	390	78	89	101	85	76	0	721	694	376	265	308	362	65	19	0	0	0	0	0	0	0	0	0	0	0	0	0	0	0	0	0	0	0	1.298	1.385	1.333	1.121	2.851	1.255	0.741	0.000	0.000	0.000	0.000	0.000	0.000	0.000	0.000	0.000	0.000	0.000	0.000	0.000	0.000	120	476	1048	1023	0.377	Error	Error	592	456	0	0	594	429	0	0	0	0
3	21	8	""	"YOR192C-B"	14930	15580	120	2864	2655	1592	78	81	40	97	96	0	3661	3264	1943	265	296	273	81	78	0	0	0	0	0	0	0	0	0	0	0	0	0	0	0	0	0	0	0	0.820	0.859	0.874	0.898	2.111	0.856	0.888	0.000	0.000	0.000	0.000	0.000	0.000	0.000	0.000	0.000	0.000	0.000	0.000	0.000	0.000	120	477	6182	5576	-0.286	Error	Error	2786	3396	0	0	2577	2999	0	0	0	0
3	22	8	"rpb8"	"YOR224C"	15120	15580	120	1128	990	533	77	83	68	90	85	0	992	881	453	274	289	149	78	71	0	0	0	0	0	0	0	0	0	0	0	0	0	0	0	0	0	0	0	1.464	1.504	1.434	1.429	1.926	1.426	0.787	0.000	0.000	0.000	0.000	0.000	0.000	0.000	0.000	0.000	0.000	0.000	0.000	0.000	0.000	120	566	1769	1520	0.550	Error	Error	1051	718	0	0	913	607	0	0	0	0
3	1	9	""	"YOR256C"	11120	15760	110	3727	3526	1738	78	110	278	100	96	0	2014	1975	834	286	316	203	98	91	0	0	0	0	0	0	0	0	0	0	0	0	0	0	0	0	0	0	0	2.112	2.041	1.974	2.018	1.438	2.210	0.831	0.000	0.000	0.000	0.000	0.000	0.000	0.000	0.000	0.000	0.000	0.000	0.000	0.000	0.000	80	483	5377	5137	1.078	Error	Error	3649	1728	0	0	3448	1689	0	0	0	0
3	2	9	"TOA1"	"YOR194C"	11310	15770	120	2776	2343	1265	82	114	283	90	80	0	1357	1190	626	287	314	206	77	72	0	0	0	0	0	0	0	0	0	0	0	0	0	0	0	0	0	0	0	2.518	2.504	2.451	2.597	1.599	2.355	0.837	0.000	0.000	0.000	0.000	0.000	0.000	0.000	0.000	0.000	0.000	0.000	0.000	0.000	0.000	120	464	3764	3164	1.332	Error	Error	2694	1070	0	0	2261	903	0	0	0	0
3	3	9	"ISU2"	"YOR226C"	11480	15760	110	1142	962	510	86	128	207	81	77	0	666	640	343	288	313	142	70	66	0	0	0	0	0	0	0	0	0	0	0	0	0	0	0	0	0	0	0	2.794	2.489	2.128	1.805	3.612	2.144	0.697	0.000	0.000	0.000	0.000	0.000	0.000	0.000	0.000	0.000	0.000	0.000	0.000	0.000	0.000	80	460	1434	1228	1.482	Error	Error	1056	378	0	0	876	352	0	0	0	0
3	4	9	""	"YOR258W"	11690	15770	120	1275	1161	698	81	116	190	83	77	0	1332	1238	736	284	303	122	79	76	0	0	0	0	0	0	0	0	0	0	0	0	0	0	0	0	0	0	0	1.139	1.132	1.072	1.005	2.111	1.054	0.823	0.000	0.000	0.000	0.000	0.000	0.000	0.000	0.000	0.000	0.000	0.000	0.000	0.000	0.000	120	512	2242	2034	0.188	Error	Error	1194	1048	0	0	1080	954	0	0	0	0
3	5	9	"MRPL40"	"YPL173W"	11870	15760	110	2772	2182	1197	79	99	164	86	82	0	2768	2248	1185	284	319	258	81	77	0	0	0	0	0	0	0	0	0	0	0	0	0	0	0	0	0	0	0	1.084	1.071	1.078	1.020	1.790	1.059	0.878	0.000	0.000	0.000	0.000	0.000	0.000	0.000	0.000	0.000	0.000	0.000	0.000	0.000	0.000	80	436	5177	4067	0.117	Error	Error	2693	2484	0	0	2103	1964	0	0	0	0
3	6	9	"HRR25"	"YPL204W"	12060	15760	110	193	191	91	80	103	168	22	1	0	423	394	205	288	322	256	26	1	0	0	0	0	0	0	0	0	0	0	0	0	0	0	0	0	0	0	0	0.837	1.047	0.531	0.529	2.734	0.333	0.291	0.000	0.000	0.000	0.000	0.000	0.000	0.000	0.000	0.000	0.000	0.000	0.000	0.000	0.000	80	481	248	217	-0.257	Error	Error	113	135	0	0	111	106	0	0	0	0
3	7	9	""	"YPL236C"	12240	15760	110	1906	1679	987	78	104	202	83	77	0	1639	1508	911	282	314	231	73	72	0	0	0	0	0	0	0	0	0	0	0	0	0	0	0	0	0	0	0	1.347	1.306	1.341	1.501	2.123	1.235	0.818	0.000	0.000	0.000	0.000	0.000	0.000	0.000	0.000	0.000	0.000	0.000	0.000	0.000	0.000	80	502	3185	2827	0.430	Error	Error	1828	1357	0	0	1601	1226	0	0	0	0
3	8	9	"spt14"	"YPL175W"	12450	15770	120	3023	2528	1265	83	109	196	96	89	0	5967	5231	2518	284	322	223	98	93	0	0	0	0	0	0	0	0	0	0	0	0	0	0	0	0	0	0	0	0.517	0.494	0.503	0.504	1.538	0.485	0.890	0.000	0.000	0.000	0.000	0.000	0.000	0.000	0.000	0.000	0.000	0.000	0.000	0.000	0.000	120	531	8623	7392	-0.951	Error	Error	2940	5683	0	0	2445	4947	0	0	0	0
3	9	9	""	"YPL206C"	12620	15760	110	2867	2293	1187	95	120	210	93	86	0	1609	1397	672	290	321	172	88	80	0	0	0	0	0	0	0	0	0	0	0	0	0	0	0	0	0	0	0	2.102	1.986	1.983	1.987	1.552	2.067	0.829	0.000	0.000	0.000	0.000	0.000	0.000	0.000	0.000	0.000	0.000	0.000	0.000	0.000	0.000	80	473	4091	3305	1.071	Error	Error	2772	1319	0	0	2198	1107	0	0	0	0
3	10	9	""	"YPL238C"	12810	15760	110	824	706	360	83	116	215	77	68	0	741	682	337	289	323	178	73	65	0	0	0	0	0	0	0	0	0	0	0	0	0	0	0	0	0	0	0	1.639	1.585	1.391	1.330	2.023	1.411	0.701	0.000	0.000	0.000	0.000	0.000	0.000	0.000	0.000	0.000	0.000	0.000	0.000	0.000	0.000	80	506	1193	1016	0.713	Error	Error	741	452	0	0	623	393	0	0	0	0
3	11	9	"CUP9"	"YPL177C"	13010	15770	120	1307	1160	601	81	91	77	95	88	0	4482	4044	2029	281	297	95	98	96	0	0	0	0	0	0	0	0	0	0	0	0	0	0	0	0	0	0	0	0.292	0.287	0.286	0.271	1.453	0.277	0.885	0.000	0.000	0.000	0.000	0.000	0.000	0.000	0.000	0.000	0.000	0.000	0.000	0.000	0.000	120	534	5427	4842	-1.777	Error	Error	1226	4201	0	0	1079	3763	0	0	0	0
3	12	9	""	"YPL208W"	13190	15770	120	2439	2210	1048	81	85	49	100	100	0	952	881	375	279	302	329	72	50	0	0	0	0	0	0	0	0	0	0	0	0	0	0	0	0	0	0	0	3.504	3.537	3.556	3.602	1.543	3.547	0.824	0.000	0.000	0.000	0.000	0.000	0.000	0.000	0.000	0.000	0.000	0.000	0.000	0.000	0.000	120	534	3031	2731	1.809	Error	Error	2358	673	0	0	2129	602	0	0	0	0
3	13	9	"hsp82"	"YPL240C"	13390	15770	120	1899	2042	992	80	83	31	99	99	0	1789	1895	881	277	281	77	95	95	0	0	0	0	0	0	0	0	0	0	0	0	0	0	0	0	0	0	0	1.203	1.213	1.180	1.225	1.726	1.179	0.858	0.000	0.000	0.000	0.000	0.000	0.000	0.000	0.000	0.000	0.000	0.000	0.000	0.000	0.000	120	546	3331	3580	0.267	Error	Error	1819	1512	0	0	1962	1618	0	0	0	0
3	14	9	"PPQ1"	"YPL179W"	13570	15760	110	4546	3610	1924	81	132	382	93	81	0	2040	1859	901	273	310	232	83	82	0	0	0	0	0	0	0	0	0	0	0	0	0	0	0	0	0	0	0	2.527	2.225	2.163	2.203	1.562	2.392	0.864	0.000	0.000	0.000	0.000	0.000	0.000	0.000	0.000	0.000	0.000	0.000	0.000	0.000	0.000	80	484	6232	5115	1.337	Error	Error	4465	1767	0	0	3529	1586	0	0	0	0
3	15	9	"SRP72"	"YPL210C"	13770	15770	120	1276	1227	618	81	124	352	85	77	0	941	898	450	285	312	215	75	67	0	0	0	0	0	0	0	0	0	0	0	0	0	0	0	0	0	0	0	1.822	1.869	1.696	2.099	2.133	1.769	0.808	0.000	0.000	0.000	0.000	0.000	0.000	0.000	0.000	0.000	0.000	0.000	0.000	0.000	0.000	120	570	1851	1759	0.865	Error	Error	1195	656	0	0	1146	613	0	0	0	0
3	16	9	"IQG1"	"YPL242C"	13970	15770	120	346	359	174	80	88	93	85	65	0	621	631	328	280	286	84	80	75	0	0	0	0	0	0	0	0	0	0	0	0	0	0	0	0	0	0	0	0.780	0.795	0.765	0.758	2.354	0.573	0.590	0.000	0.000	0.000	0.000	0.000	0.000	0.000	0.000	0.000	0.000	0.000	0.000	0.000	0.000	120	528	607	630	-0.358	Error	Error	266	341	0	0	279	351	0	0	0	0
3	17	9	"EMPTY"	"EMPTY"	14160	15760	150	107	120	71	79	89	96	13	5	0	282	308	158	276	286	98	18	11	0	0	0	0	0	0	0	0	0	0	0	0	0	0	0	0	0	0	0	4.667	1.281	0.454	0.539	4.517	0.198	0.120	0.000	0.000	0.000	0.000	0.000	0.000	0.000	0.000	0.000	0.000	0.000	0.000	0.000	0.000	156	607	34	73	2.222	Error	Error	28	6	0	0	41	32	0	0	-75	0
3	18	9	"EMPTY"	"EMPTY"	14350	15760	150	97	119	81	79	83	32	37	23	0	274	307	149	273	277	72	28	15	0	0	0	0	0	0	0	0	0	0	0	0	0	0	0	0	0	0	0	18.000	1.176	0.474	0.503	4.573	0.287	0.172	0.000	0.000	0.000	0.000	0.000	0.000	0.000	0.000	0.000	0.000	0.000	0.000	0.000	0.000	156	561	19	74	4.170	Error	Error	18	1	0	0	40	34	0	0	-75	0
3	19	9	"EMPTY"	"EMPTY"	14540	15760	150	106	159	134	82	85	33	43	30	0	315	360	199	273	279	75	37	21	0	0	0	0	0	0	0	0	0	0	0	0	0	0	0	0	0	0	0	0.571	0.885	0.575	0.509	3.920	0.475	0.319	0.000	0.000	0.000	0.000	0.000	0.000	0.000	0.000	0.000	0.000	0.000	0.000	0.000	0.000	156	556	66	164	-0.807	Error	Error	24	42	0	0	77	87	0	0	-75	0
3	20	9	"EMPTY"	"EMPTY"	14730	15760	150	104	124	74	81	84	33	40	24	0	281	306	136	268	276	75	29	15	0	0	0	0	0	0	0	0	0	0	0	0	0	0	0	0	0	0	0	1.769	1.132	0.477	0.490	3.906	0.223	0.105	0.000	0.000	0.000	0.000	0.000	0.000	0.000	0.000	0.000	0.000	0.000	0.000	0.000	0.000	156	502	36	81	0.823	Error	Error	23	13	0	0	43	38	0	0	-75	0
3	21	9	"EMPTY"	"EMPTY"	14920	15760	150	97	116	69	81	83	32	39	24	0	273	297	141	269	275	74	24	12	0	0	0	0	0	0	0	0	0	0	0	0	0	0	0	0	0	0	0	4.000	1.250	0.450	0.481	3.633	0.146	0.051	0.000	0.000	0.000	0.000	0.000	0.000	0.000	0.000	0.000	0.000	0.000	0.000	0.000	0.000	156	571	20	63	2.000	Error	Error	16	4	0	0	35	28	0	0	-75	0
3	22	9	"EMPTY"	"EMPTY"	15110	15760	150	90	115	80	81	84	31	32	21	0	282	318	153	275	282	74	30	14	0	0	0	0	0	0	0	0	0	0	0	0	0	0	0	0	0	0	0	1.286	0.791	0.502	0.513	3.557	0.237	0.134	0.000	0.000	0.000	0.000	0.000	0.000	0.000	0.000	0.000	0.000	0.000	0.000	0.000	0.000	156	781	16	77	0.363	Error	Error	9	7	0	0	34	43	0	0	-75	0
3	1	10	"EMPTY"	"EMPTY"	11120	15950	150	94	117	73	82	100	209	4	0	0	306	347	197	294	311	160	13	8	0	0	0	0	0	0	0	0	0	0	0	0	0	0	0	0	0	0	0	1.000	0.660	0.378	0.449	4.559	1.322	0.311	0.000	0.000	0.000	0.000	0.000	0.000	0.000	0.000	0.000	0.000	0.000	0.000	0.000	0.000	156	864	24	88	0.000	Error	Error	12	12	0	0	35	53	0	0	-75	0
3	2	10	"EMPTY"	"EMPTY"	11310	15950	150	94	128	91	85	110	246	3	0	0	309	354	193	292	313	178	15	7	0	0	0	0	0	0	0	0	0	0	0	0	0	0	0	0	0	0	0	0.529	0.694	0.464	0.451	3.180	0.193	0.170	0.000	0.000	0.000	0.000	0.000	0.000	0.000	0.000	0.000	0.000	0.000	0.000	0.000	0.000	156	615	26	105	-0.918	Error	Error	9	17	0	0	43	62	0	0	-75	0
3	3	10	"EMPTY"	"EMPTY"	11500	15950	150	91	116	83	84	117	181	5	0	0	292	322	152	293	308	114	18	8	0	0	0	0	0	0	0	0	0	0	0	0	0	0	0	0	0	0	0	-7.000	1.103	0.458	0.437	3.442	0.667	0.163	0.000	0.000	0.000	0.000	0.000	0.000	0.000	0.000	0.000	0.000	0.000	0.000	0.000	0.000	156	628	6	61	Error	Error	Error	7	-1	0	0	32	29	0	0	-75	0
3	4	10	"EMPTY"	"EMPTY"	11690	15950	150	98	125	88	80	99	124	13	5	0	280	314	160	287	304	103	18	8	0	0	0	0	0	0	0	0	0	0	0	0	0	0	0	0	0	0	0	-2.571	1.667	0.439	0.467	4.091	0.240	0.133	0.000	0.000	0.000	0.000	0.000	0.000	0.000	0.000	0.000	0.000	0.000	0.000	0.000	0.000	156	627	11	72	Error	Error	Error	18	-7	0	0	45	27	0	0	-75	0
3	5	10	"EMPTY"	"EMPTY"	11880	15950	150	92	122	85	80	94	136	10	2	0	285	320	165	290	324	229	7	2	0	0	0	0	0	0	0	0	0	0	0	0	0	0	0	0	0	0	0	-2.400	1.400	0.452	0.496	4.107	0.506	0.433	0.000	0.000	0.000	0.000	0.000	0.000	0.000	0.000	0.000	0.000	0.000	0.000	0.000	0.000	156	649	7	72	Error	Error	Error	12	-5	0	0	42	30	0	0	-75	0
3	6	10	"EMPTY"	"EMPTY"	12070	15950	150	94	117	81	84	96	130	8	3	0	312	332	169	288	315	215	10	3	0	0	0	0	0	0	0	0	0	0	0	0	0	0	0	0	0	0	0	0.417	0.750	0.391	0.442	3.216	0.208	0.142	0.000	0.000	0.000	0.000	0.000	0.000	0.000	0.000	0.000	0.000	0.000	0.000	0.000	0.000	156	721	34	77	-1.263	Error	Error	10	24	0	0	33	44	0	0	-75	0
3	7	10	""	"iYBL030C-0"	12280	15960	120	1421	1401	928	86	99	167	88	77	0	1030	955	555	285	306	167	76	69	0	0	0	0	0	0	0	0	0	0	0	0	0	0	0	0	0	0	0	1.792	1.963	1.790	1.829	1.861	1.913	0.827	0.000	0.000	0.000	0.000	0.000	0.000	0.000	0.000	0.000	0.000	0.000	0.000	0.000	0.000	120	571	2080	1985	0.842	Error	Error	1335	745	0	0	1315	670	0	0	0	0
3	8	10	""	"iYBL027W"	12470	15960	120	2044	1791	1018	91	93	35	98	96	0	1747	1575	816	289	298	79	85	85	0	0	0	0	0	0	0	0	0	0	0	0	0	0	0	0	0	0	0	1.340	1.322	1.339	1.405	2.158	1.358	0.847	0.000	0.000	0.000	0.000	0.000	0.000	0.000	0.000	0.000	0.000	0.000	0.000	0.000	0.000	120	514	3411	2986	0.422	Error	Error	1953	1458	0	0	1700	1286	0	0	0	0
3	9	10	""	"iYBL023C"	12640	15970	110	704	601	354	93	109	143	75	66	0	710	623	334	292	313	130	71	65	0	0	0	0	0	0	0	0	0	0	0	0	0	0	0	0	0	0	0	1.462	1.535	1.263	1.078	2.732	1.325	0.718	0.000	0.000	0.000	0.000	0.000	0.000	0.000	0.000	0.000	0.000	0.000	0.000	0.000	0.000	80	491	1029	839	0.548	Error	Error	611	418	0	0	508	331	0	0	0	0
3	10	10	""	"iYBL009W"	12830	15960	110	925	857	374	78	102	121	95	81	0	1861	1709	738	287	339	248	90	83	0	0	0	0	0	0	0	0	0	0	0	0	0	0	0	0	0	0	0	0.538	0.548	0.548	0.577	1.687	0.505	0.872	0.000	0.000	0.000	0.000	0.000	0.000	0.000	0.000	0.000	0.000	0.000	0.000	0.000	0.000	80	534	2421	2201	-0.894	Error	Error	847	1574	0	0	779	1422	0	0	0	0
3	11	10	""	"iYBL005W"	13030	15960	110	1063	1054	708	85	95	90	81	80	0	1769	1598	1077	288	329	235	75	70	0	0	0	0	0	0	0	0	0	0	0	0	0	0	0	0	0	0	0	0.660	0.740	0.716	0.724	1.652	0.672	0.853	0.000	0.000	0.000	0.000	0.000	0.000	0.000	0.000	0.000	0.000	0.000	0.000	0.000	0.000	80	522	2459	2279	-0.599	Error	Error	978	1481	0	0	969	1310	0	0	0	0
3	12	10	""	"iYBL003C"	13220	15970	110	739	773	556	83	90	52	81	77	0	4709	4304	3249	284	346	523	72	70	0	0	0	0	0	0	0	0	0	0	0	0	0	0	0	0	0	0	0	0.148	0.172	0.172	0.197	1.855	0.157	0.870	0.000	0.000	0.000	0.000	0.000	0.000	0.000	0.000	0.000	0.000	0.000	0.000	0.000	0.000	80	541	5081	4710	-2.754	Error	Error	656	4425	0	0	690	4020	0	0	0	0
3	13	10	""	"iYBRCdelta11"	13430	15950	80	114	120	61	80	84	32	50	30	0	360	420	409	283	289	79	48	42	0	0	0	0	0	0	0	0	0	0	0	0	0	0	0	0	0	0	0	0.442	0.292	0.143	0.151	2.379	0.130	0.375	0.000	0.000	0.000	0.000	0.000	0.000	0.000	0.000	0.000	0.000	0.000	0.000	0.000	0.000	52	325	111	177	-1.179	Error	Error	34	77	0	0	40	137	0	0	0	0
3	14	10	""	"iYBR014C"	13610	15970	110	610	664	480	80	98	247	67	52	0	1124	1146	823	282	293	149	68	67	0	0	0	0	0	0	0	0	0	0	0	0	0	0	0	0	0	0	0	0.629	0.676	0.593	0.512	2.472	0.592	0.861	0.000	0.000	0.000	0.000	0.000	0.000	0.000	0.000	0.000	0.000	0.000	0.000	0.000	0.000	80	526	1372	1448	-0.668	Error	Error	530	842	0	0	584	864	0	0	0	0
3	15	10	""	"iYBR018C"	13790	15960	110	1143	1157	806	80	83	30	91	87	0	931	816	490	283	289	70	75	72	0	0	0	0	0	0	0	0	0	0	0	0	0	0	0	0	0	0	0	1.640	2.021	1.823	1.524	2.651	1.878	0.802	0.000	0.000	0.000	0.000	0.000	0.000	0.000	0.000	0.000	0.000	0.000	0.000	0.000	0.000	80	488	1711	1610	0.714	Error	Error	1063	648	0	0	1077	533	0	0	0	0
3	16	10	""	"iYBR035C"	13970	15970	110	1564	1413	820	84	106	157	83	83	0	852	802	429	282	301	113	78	70	0	0	0	0	0	0	0	0	0	0	0	0	0	0	0	0	0	0	0	2.596	2.556	2.310	2.322	2.397	2.428	0.800	0.000	0.000	0.000	0.000	0.000	0.000	0.000	0.000	0.000	0.000	0.000	0.000	0.000	0.000	80	511	2050	1849	1.377	Error	Error	1480	570	0	0	1329	520	0	0	0	0
3	17	10	""	"iYBR038W"	14170	15960	110	1350	1150	672	84	110	165	81	76	0	1145	1000	568	280	306	150	77	76	0	0	0	0	0	0	0	0	0	0	0	0	0	0	0	0	0	0	0	1.464	1.481	1.364	1.301	1.900	1.352	0.821	0.000	0.000	0.000	0.000	0.000	0.000	0.000	0.000	0.000	0.000	0.000	0.000	0.000	0.000	80	517	2131	1786	0.550	Error	Error	1266	865	0	0	1066	720	0	0	0	0
3	18	10	""	"iYBR042C"	14370	15970	120	373	372	208	83	91	63	81	73	0	743	728	428	277	293	121	75	69	0	0	0	0	0	0	0	0	0	0	0	0	0	0	0	0	0	0	0	0.622	0.641	0.587	0.511	2.533	0.508	0.735	0.000	0.000	0.000	0.000	0.000	0.000	0.000	0.000	0.000	0.000	0.000	0.000	0.000	0.000	120	627	756	740	-0.684	Error	Error	290	466	0	0	289	451	0	0	0	0
3	19	10	""	"iYCR018C"	14580	15960	80	134	145	64	84	86	30	61	46	0	357	349	182	274	280	80	50	34	0	0	0	0	0	0	0	0	0	0	0	0	0	0	0	0	0	0	0	0.602	0.813	0.380	0.468	2.814	0.221	0.234	0.000	0.000	0.000	0.000	0.000	0.000	0.000	0.000	0.000	0.000	0.000	0.000	0.000	0.000	52	276	133	136	-0.731	Error	Error	50	83	0	0	61	75	0	0	0	0
3	20	10	""	"iYCRCtau1"	14730	15950	150	151	196	168	84	88	33	59	50	0	325	350	182	282	288	81	44	28	0	0	0	0	0	0	0	0	0	0	0	0	0	0	0	0	0	0	0	1.558	1.647	0.667	0.599	3.607	0.775	0.297	0.000	0.000	0.000	0.000	0.000	0.000	0.000	0.000	0.000	0.000	0.000	0.000	0.000	0.000	156	641	110	180	0.640	Error	Error	67	43	0	0	112	68	0	0	-50	0
3	21	10	""	"iYCR020C"	14940	15970	110	421	383	242	88	91	34	80	76	0	1083	915	615	277	287	79	73	68	0	0	0	0	0	0	0	0	0	0	0	0	0	0	0	0	0	0	0	0.413	0.462	0.420	0.368	2.378	0.387	0.765	0.000	0.000	0.000	0.000	0.000	0.000	0.000	0.000	0.000	0.000	0.000	0.000	0.000	0.000	80	459	1139	933	-1.275	Error	Error	333	806	0	0	295	638	0	0	0	0
3	22	10	""	"iSNR65"	15130	15960	110	549	502	275	87	91	33	83	80	0	563	492	260	286	293	85	71	63	0	0	0	0	0	0	0	0	0	0	0	0	0	0	0	0	0	0	0	1.668	2.015	1.518	1.415	2.915	1.464	0.519	0.000	0.000	0.000	0.000	0.000	0.000	0.000	0.000	0.000	0.000	0.000	0.000	0.000	0.000	80	536	739	621	0.738	Error	Error	462	277	0	0	415	206	0	0	0	0
3	1	11	""	"iYCR033W"	11150	16160	110	548	585	364	84	88	33	91	86	0	1135	1054	683	284	290	77	75	72	0	0	0	0	0	0	0	0	0	0	0	0	0	0	0	0	0	0	0	0.545	0.651	0.620	0.622	2.556	0.535	0.825	0.000	0.000	0.000	0.000	0.000	0.000	0.000	0.000	0.000	0.000	0.000	0.000	0.000	0.000	80	546	1315	1271	-0.875	Error	Error	464	851	0	0	501	770	0	0	0	0
3	2	11	""	"iYCR037C"	11330	16160	110	1759	1732	1133	86	90	38	98	93	0	932	986	609	289	293	79	76	75	0	0	0	0	0	0	0	0	0	0	0	0	0	0	0	0	0	0	0	2.602	2.362	2.167	2.228	1.887	2.263	0.825	0.000	0.000	0.000	0.000	0.000	0.000	0.000	0.000	0.000	0.000	0.000	0.000	0.000	0.000	80	489	2316	2343	1.380	Error	Error	1673	643	0	0	1646	697	0	0	0	0
3	3	11	""	"iYCR060W"	11510	16150	110	1508	1385	852	83	104	152	86	80	0	593	556	292	298	308	102	72	62	0	0	0	0	0	0	0	0	0	0	0	0	0	0	0	0	0	0	0	4.831	5.047	4.201	3.137	3.483	4.378	0.641	0.000	0.000	0.000	0.000	0.000	0.000	0.000	0.000	0.000	0.000	0.000	0.000	0.000	0.000	80	509	1720	1560	2.272	Error	Error	1425	295	0	0	1302	258	0	0	0	0
3	4	11	""	"iYCR066W"	11710	16150	110	433	425	204	84	102	147	80	61	0	2110	1881	1215	290	308	103	78	75	0	0	0	0	0	0	0	0	0	0	0	0	0	0	0	0	0	0	0	0.192	0.214	0.204	0.234	2.018	0.175	0.806	0.000	0.000	0.000	0.000	0.000	0.000	0.000	0.000	0.000	0.000	0.000	0.000	0.000	0.000	80	533	2169	1932	-2.383	Error	Error	349	1820	0	0	341	1591	0	0	0	0
3	5	11	""	"iYCR071C"	11900	16160	110	842	742	439	84	88	33	95	87	0	2328	2111	1418	289	309	122	77	72	0	0	0	0	0	0	0	0	0	0	0	0	0	0	0	0	0	0	0	0.372	0.361	0.356	0.389	2.201	0.309	0.869	0.000	0.000	0.000	0.000	0.000	0.000	0.000	0.000	0.000	0.000	0.000	0.000	0.000	0.000	80	495	2797	2480	-1.428	Error	Error	758	2039	0	0	658	1822	0	0	0	0
3	6	11	""	"iYCR090C-1"	12090	16150	110	3150	2515	1295	85	101	121	98	95	0	1760	1561	757	293	326	217	81	78	0	0	0	0	0	0	0	0	0	0	0	0	0	0	0	0	0	0	0	2.089	1.916	2.014	2.130	1.993	1.963	0.830	0.000	0.000	0.000	0.000	0.000	0.000	0.000	0.000	0.000	0.000	0.000	0.000	0.000	0.000	80	524	4532	3698	1.063	Error	Error	3065	1467	0	0	2430	1268	0	0	0	0
3	7	11	""	"iYCR094W"	12290	16150	110	469	475	275	85	98	100	76	68	0	1212	1057	679	286	308	149	71	70	0	0	0	0	0	0	0	0	0	0	0	0	0	0	0	0	0	0	0	0.415	0.506	0.496	0.509	2.025	0.411	0.786	0.000	0.000	0.000	0.000	0.000	0.000	0.000	0.000	0.000	0.000	0.000	0.000	0.000	0.000	80	511	1310	1161	-1.270	Error	Error	384	926	0	0	390	771	0	0	0	0
3	8	11	""	"iYCRWomega3"	12470	16150	110	1468	1571	1219	88	92	35	93	90	0	2121	2376	1701	295	306	134	83	80	0	0	0	0	0	0	0	0	0	0	0	0	0	0	0	0	0	0	0	0.756	0.713	0.675	0.701	1.685	0.648	0.856	0.000	0.000	0.000	0.000	0.000	0.000	0.000	0.000	0.000	0.000	0.000	0.000	0.000	0.000	80	482	3206	3564	-0.404	Error	Error	1380	1826	0	0	1483	2081	0	0	0	0
3	9	11	""	"iYDR036C"	12660	16150	110	1692	1439	805	93	110	126	91	81	0	1265	1085	626	295	322	194	73	72	0	0	0	0	0	0	0	0	0	0	0	0	0	0	0	0	0	0	0	1.648	1.704	1.546	1.634	1.652	1.531	0.820	0.000	0.000	0.000	0.000	0.000	0.000	0.000	0.000	0.000	0.000	0.000	0.000	0.000	0.000	80	515	2569	2136	0.721	Error	Error	1599	970	0	0	1346	790	0	0	0	0
3	10	11	""	"iYDR040C"	12860	16150	120	717	856	759	85	105	131	83	77	0	711	716	480	285	322	227	65	42	0	0	0	0	0	0	0	0	0	0	0	0	0	0	0	0	0	0	0	1.484	1.789	1.417	1.395	2.460	1.785	0.629	0.000	0.000	0.000	0.000	0.000	0.000	0.000	0.000	0.000	0.000	0.000	0.000	0.000	0.000	120	560	1058	1202	0.569	Error	Error	632	426	0	0	771	431	0	0	0	0
3	11	11	""	"iYDR043C-0"	13030	16150	100	550	604	415	87	102	89	78	75	0	519	520	321	280	292	85	65	58	0	0	0	0	0	0	0	0	0	0	0	0	0	0	0	0	0	0	0	1.937	2.154	1.831	1.689	2.903	1.741	0.570	0.000	0.000	0.000	0.000	0.000	0.000	0.000	0.000	0.000	0.000	0.000	0.000	0.000	0.000	80	417	702	757	0.954	Error	Error	463	239	0	0	517	240	0	0	0	0
3	12	11	""	"itD(GUC)D"	13220	16150	110	335	304	154	87	100	84	75	61	0	587	531	260	278	289	92	73	66	0	0	0	0	0	0	0	0	0	0	0	0	0	0	0	0	0	0	0	0.803	0.858	0.783	0.641	2.735	0.619	0.612	0.000	0.000	0.000	0.000	0.000	0.000	0.000	0.000	0.000	0.000	0.000	0.000	0.000	0.000	80	526	557	470	-0.317	Error	Error	248	309	0	0	217	253	0	0	0	0
3	13	11	""	"iYDR062W"	13420	16150	110	861	790	500	86	93	49	83	82	0	746	641	374	283	292	102	70	67	0	0	0	0	0	0	0	0	0	0	0	0	0	0	0	0	0	0	0	1.674	1.966	1.599	1.230	3.118	1.642	0.730	0.000	0.000	0.000	0.000	0.000	0.000	0.000	0.000	0.000	0.000	0.000	0.000	0.000	0.000	80	569	1238	1062	0.743	Error	Error	775	463	0	0	704	358	0	0	0	0
3	14	11	""	"iYDR066C"	13610	16150	110	356	413	293	85	91	44	76	73	0	1294	1334	986	279	295	109	77	72	0	0	0	0	0	0	0	0	0	0	0	0	0	0	0	0	0	0	0	0.267	0.311	0.279	0.282	1.966	0.270	0.830	0.000	0.000	0.000	0.000	0.000	0.000	0.000	0.000	0.000	0.000	0.000	0.000	0.000	0.000	80	530	1286	1383	-1.905	Error	Error	271	1015	0	0	328	1055	0	0	0	0
3	15	11	""	"iYDR082W"	13800	16150	110	215	211	109	80	84	33	75	66	0	546	494	274	276	292	111	68	60	0	0	0	0	0	0	0	0	0	0	0	0	0	0	0	0	0	0	0	0.500	0.601	0.499	0.417	2.408	0.404	0.561	0.000	0.000	0.000	0.000	0.000	0.000	0.000	0.000	0.000	0.000	0.000	0.000	0.000	0.000	80	512	405	349	-1.000	Error	Error	135	270	0	0	131	218	0	0	0	0
3	16	11	""	"iYDR086C"	13990	16150	110	750	635	361	84	88	46	85	80	0	507	479	241	279	290	89	72	56	0	0	0	0	0	0	0	0	0	0	0	0	0	0	0	0	0	0	0	2.921	2.755	2.540	1.823	3.219	0.609	0.106	0.000	0.000	0.000	0.000	0.000	0.000	0.000	0.000	0.000	0.000	0.000	0.000	0.000	0.000	80	512	894	751	1.546	Error	Error	666	228	0	0	551	200	0	0	0	0
3	17	11	""	"itR(ACG)D-1"	14190	16150	110	1375	1263	687	87	93	63	96	92	0	732	695	317	284	297	99	78	75	0	0	0	0	0	0	0	0	0	0	0	0	0	0	0	0	0	0	0	2.875	2.861	2.678	2.612	1.877	2.774	0.759	0.000	0.000	0.000	0.000	0.000	0.000	0.000	0.000	0.000	0.000	0.000	0.000	0.000	0.000	80	527	1736	1587	1.524	Error	Error	1288	448	0	0	1176	411	0	0	0	0
3	18	11	""	"iYDR102C"	14360	16160	110	728	643	375	88	103	86	81	75	0	554	533	317	288	304	104	66	60	0	0	0	0	0	0	0	0	0	0	0	0	0	0	0	0	0	0	0	2.406	2.265	2.114	1.855	3.079	1.678	0.663	0.000	0.000	0.000	0.000	0.000	0.000	0.000	0.000	0.000	0.000	0.000	0.000	0.000	0.000	80	490	906	800	1.267	Error	Error	640	266	0	0	555	245	0	0	0	0
3	19	11	""	"iYDRCsigma2"	14580	16150	90	231	217	107	94	97	40	69	65	0	549	499	240	291	301	91	69	61	0	0	0	0	0	0	0	0	0	0	0	0	0	0	0	0	0	0	0	0.531	0.591	0.520	0.462	2.208	0.416	0.528	0.000	0.000	0.000	0.000	0.000	0.000	0.000	0.000	0.000	0.000	0.000	0.000	0.000	0.000	52	385	395	331	-0.913	Error	Error	137	258	0	0	123	208	0	0	0	0
3	20	11	""	"iYDR109C"	14750	16160	120	1546	1410	905	100	114	63	88	85	0	1154	1063	649	308	320	100	73	72	0	0	0	0	0	0	0	0	0	0	0	0	0	0	0	0	0	0	0	1.709	1.735	1.574	1.566	2.998	1.584	0.821	0.000	0.000	0.000	0.000	0.000	0.000	0.000	0.000	0.000	0.000	0.000	0.000	0.000	0.000	120	431	2292	2065	0.773	Error	Error	1446	846	0	0	1310	755	0	0	0	0
3	21	11	""	"iYDR418W"	14920	16140	150	176	244	195	108	120	58	51	35	0	338	358	178	309	321	103	32	17	0	0	0	0	0	0	0	0	0	0	0	0	0	0	0	0	0	0	0	2.345	2.776	0.891	0.829	4.390	0.989	0.231	0.000	0.000	0.000	0.000	0.000	0.000	0.000	0.000	0.000	0.000	0.000	0.000	0.000	0.000	156	664	97	185	1.229	Error	Error	68	29	0	0	136	49	0	0	-50	0
3	22	11	""	"iYDR421W"	15120	16150	110	727	735	437	93	99	38	91	83	0	4525	4200	2641	297	314	148	82	82	0	0	0	0	0	0	0	0	0	0	0	0	0	0	0	0	0	0	0	0.150	0.164	0.160	0.155	1.545	0.150	0.849	0.000	0.000	0.000	0.000	0.000	0.000	0.000	0.000	0.000	0.000	0.000	0.000	0.000	0.000	80	527	4862	4545	-2.737	Error	Error	634	4228	0	0	642	3903	0	0	0	0
3	1	12	""	"iYDR426C"	11140	16350	110	252	252	140	85	89	40	71	66	0	503	455	255	285	288	83	65	62	0	0	0	0	0	0	0	0	0	0	0	0	0	0	0	0	0	0	0	0.766	0.982	0.654	0.523	3.087	0.498	0.499	0.000	0.000	0.000	0.000	0.000	0.000	0.000	0.000	0.000	0.000	0.000	0.000	0.000	0.000	80	525	385	337	-0.384	Error	Error	167	218	0	0	167	170	0	0	0	0
3	2	12	""	"itK(CUU)D2"	11320	16340	110	267	270	157	84	87	31	77	73	0	658	618	347	287	292	82	72	71	0	0	0	0	0	0	0	0	0	0	0	0	0	0	0	0	0	0	0	0.493	0.562	0.445	0.396	2.201	0.408	0.605	0.000	0.000	0.000	0.000	0.000	0.000	0.000	0.000	0.000	0.000	0.000	0.000	0.000	0.000	80	467	554	517	-1.020	Error	Error	183	371	0	0	186	331	0	0	0	0
3	3	12	""	"iYDR448W"	11490	16340	110	378	346	166	81	91	89	80	67	0	680	618	278	291	312	149	75	66	0	0	0	0	0	0	0	0	0	0	0	0	0	0	0	0	0	0	0	0.763	0.810	0.701	0.623	2.076	0.574	0.691	0.000	0.000	0.000	0.000	0.000	0.000	0.000	0.000	0.000	0.000	0.000	0.000	0.000	0.000	80	500	686	592	-0.389	Error	Error	297	389	0	0	265	327	0	0	0	0
3	4	12	""	"iYDR452W"	11690	16350	110	455	403	213	84	90	43	81	78	0	823	689	383	282	302	109	72	70	0	0	0	0	0	0	0	0	0	0	0	0	0	0	0	0	0	0	0	0.686	0.784	0.654	0.514	2.304	0.629	0.760	0.000	0.000	0.000	0.000	0.000	0.000	0.000	0.000	0.000	0.000	0.000	0.000	0.000	0.000	80	507	912	726	-0.544	Error	Error	371	541	0	0	319	407	0	0	0	0
3	5	12	""	"iYDR470C"	11880	16340	120	991	934	504	88	92	34	93	89	0	731	677	335	283	295	83	77	74	0	0	0	0	0	0	0	0	0	0	0	0	0	0	0	0	0	0	0	2.016	2.147	1.910	1.925	2.412	1.942	0.720	0.000	0.000	0.000	0.000	0.000	0.000	0.000	0.000	0.000	0.000	0.000	0.000	0.000	0.000	120	541	1351	1240	1.011	Error	Error	903	448	0	0	846	394	0	0	0	0
3	6	12	""	"iYDR473C-0"	12060	16340	110	2013	1826	1093	90	130	272	82	76	0	2203	1919	1106	290	356	382	77	75	0	0	0	0	0	0	0	0	0	0	0	0	0	0	0	0	0	0	0	1.005	1.066	1.050	1.040	1.933	1.000	0.889	0.000	0.000	0.000	0.000	0.000	0.000	0.000	0.000	0.000	0.000	0.000	0.000	0.000	0.000	80	496	3836	3365	0.008	Error	Error	1923	1913	0	0	1736	1629	0	0	0	0
3	7	12	""	"iYDR476C"	12260	16340	110	2424	2000	1026	90	141	279	90	78	0	1071	949	445	298	364	373	76	53	0	0	0	0	0	0	0	0	0	0	0	0	0	0	0	0	0	0	0	3.019	2.934	2.824	2.871	1.360	2.750	0.844	0.000	0.000	0.000	0.000	0.000	0.000	0.000	0.000	0.000	0.000	0.000	0.000	0.000	0.000	80	505	3107	2561	1.594	Error	Error	2334	773	0	0	1910	651	0	0	0	0
3	8	12	""	"iYDR494W"	12450	16340	120	840	730	399	87	103	99	84	80	0	3447	2913	1713	293	309	154	86	84	0	0	0	0	0	0	0	0	0	0	0	0	0	0	0	0	0	0	0	0.239	0.245	0.235	0.251	1.918	0.223	0.851	0.000	0.000	0.000	0.000	0.000	0.000	0.000	0.000	0.000	0.000	0.000	0.000	0.000	0.000	120	555	3907	3263	-2.066	Error	Error	753	3154	0	0	643	2620	0	0	0	0
3	9	12	""	"iYDR498C"	12630	16340	110	2231	1892	1053	90	122	208	86	78	0	1525	1295	692	286	319	200	78	76	0	0	0	0	0	0	0	0	0	0	0	0	0	0	0	0	0	0	0	1.728	1.786	1.680	1.645	1.577	1.674	0.873	0.000	0.000	0.000	0.000	0.000	0.000	0.000	0.000	0.000	0.000	0.000	0.000	0.000	0.000	80	514	3380	2811	0.789	Error	Error	2141	1239	0	0	1802	1009	0	0	0	0
3	10	12	""	"iYDR502C"	12850	16330	90	172	185	96	88	90	35	73	57	0	422	419	210	286	299	126	51	25	0	0	0	0	0	0	0	0	0	0	0	0	0	0	0	0	0	0	0	0.618	0.729	0.456	0.439	3.872	0.154	0.125	0.000	0.000	0.000	0.000	0.000	0.000	0.000	0.000	0.000	0.000	0.000	0.000	0.000	0.000	52	342	220	230	-0.695	Error	Error	84	136	0	0	97	133	0	0	0	0
3	11	12	""	"itV(AAC)E1"	13010	16340	120	1958	1714	825	86	93	54	98	98	0	822	762	361	279	303	209	75	65	0	0	0	0	0	0	0	0	0	0	0	0	0	0	0	0	0	0	0	3.448	3.371	3.225	3.221	2.141	3.099	0.526	0.000	0.000	0.000	0.000	0.000	0.000	0.000	0.000	0.000	0.000	0.000	0.000	0.000	0.000	120	533	2415	2111	1.786	Error	Error	1872	543	0	0	1628	483	0	0	0	0
3	12	12	""	"itI(AAU)E1"	13200	16340	110	146	158	74	88	93	42	61	37	0	478	405	226	278	298	196	51	7	0	0	0	0	0	0	0	0	0	0	0	0	0	0	0	0	0	0	0	0.290	0.551	0.299	0.276	2.287	0.080	0.110	0.000	0.000	0.000	0.000	0.000	0.000	0.000	0.000	0.000	0.000	0.000	0.000	0.000	0.000	80	521	258	197	-1.786	Error	Error	58	200	0	0	70	127	0	0	0	0
3	13	12	""	"iYERCdelta20"	13390	16350	110	1886	1748	1534	92	100	54	86	82	0	2433	2239	1830	290	302	112	72	71	0	0	0	0	0	0	0	0	0	0	0	0	0	0	0	0	0	0	0	0.837	0.850	0.787	0.771	2.265	0.806	0.856	0.000	0.000	0.000	0.000	0.000	0.000	0.000	0.000	0.000	0.000	0.000	0.000	0.000	0.000	80	498	3937	3605	-0.256	Error	Error	1794	2143	0	0	1656	1949	0	0	0	0
3	14	12	""	"iYER153C"	13570	16350	110	410	347	188	95	105	68	73	67	0	563	517	290	293	311	123	68	53	0	0	0	0	0	0	0	0	0	0	0	0	0	0	0	0	0	0	0	1.167	1.125	0.879	0.750	2.492	0.732	0.595	0.000	0.000	0.000	0.000	0.000	0.000	0.000	0.000	0.000	0.000	0.000	0.000	0.000	0.000	80	538	585	476	0.222	Error	Error	315	270	0	0	252	224	0	0	0	0
3	15	12	""	"iYER157W"	13780	16340	120	195	194	79	91	97	50	75	52	0	683	633	305	290	304	102	78	70	0	0	0	0	0	0	0	0	0	0	0	0	0	0	0	0	0	0	0	0.265	0.300	0.285	0.272	2.074	0.217	0.490	0.000	0.000	0.000	0.000	0.000	0.000	0.000	0.000	0.000	0.000	0.000	0.000	0.000	0.000	120	573	497	446	-1.918	Error	Error	104	393	0	0	103	343	0	0	0	0
3	16	12	""	"iYER159C"	13960	16340	120	442	479	309	89	92	39	90	84	0	609	581	297	286	299	101	77	66	0	0	0	0	0	0	0	0	0	0	0	0	0	0	0	0	0	0	0	1.093	1.322	1.147	1.003	2.339	1.106	0.606	0.000	0.000	0.000	0.000	0.000	0.000	0.000	0.000	0.000	0.000	0.000	0.000	0.000	0.000	120	536	676	685	0.128	Error	Error	353	323	0	0	390	295	0	0	0	0
3	17	12	""	"iYER174C"	14140	16350	110	475	503	301	90	92	34	87	81	0	558	560	332	293	304	92	68	60	0	0	0	0	0	0	0	0	0	0	0	0	0	0	0	0	0	0	0	1.453	1.547	1.380	1.320	2.116	1.084	0.663	0.000	0.000	0.000	0.000	0.000	0.000	0.000	0.000	0.000	0.000	0.000	0.000	0.000	0.000	80	496	650	680	0.539	Error	Error	385	265	0	0	413	267	0	0	0	0
3	18	12	""	"iYER178W"	14330	16340	120	757	726	409	94	99	48	88	85	0	2497	2281	1532	301	314	100	80	79	0	0	0	0	0	0	0	0	0	0	0	0	0	0	0	0	0	0	0	0.302	0.319	0.301	0.348	2.505	0.267	0.832	0.000	0.000	0.000	0.000	0.000	0.000	0.000	0.000	0.000	0.000	0.000	0.000	0.000	0.000	120	581	2859	2612	-1.728	Error	Error	663	2196	0	0	632	1980	0	0	0	0
3	19	12	""	"iYER181C"	14530	16350	110	613	631	415	103	171	1030	15	0	0	700	634	375	308	321	102	71	63	0	0	0	0	0	0	0	0	0	0	0	0	0	0	0	0	0	0	0	1.301	1.620	1.291	1.072	2.746	1.304	0.646	0.000	0.000	0.000	0.000	0.000	0.000	0.000	0.000	0.000	0.000	0.000	0.000	0.000	0.000	80	520	902	854	0.380	Error	Error	510	392	0	0	528	326	0	0	0	0
3	20	12	""	"iYFL064C"	14720	16330	130	33128	30216	15403	118	193	987	100	97	0	33676	27931	15046	321	345	147	99	99	0	0	0	0	0	0	0	0	0	0	0	0	0	0	0	0	0	0	0	0.990	1.090	1.079	1.168	1.764	1.069	0.893	0.000	0.000	0.000	0.000	0.000	0.000	0.000	0.000	0.000	0.000	0.000	0.000	0.000	0.000	120	566	66365	57708	-0.015	Error	Error	33010	33355	0	0	30098	27610	0	0	0	0
3	21	12	""	"iYFL061W"	14890	16340	110	731	644	381	135	147	77	78	73	0	989	896	509	328	357	150	76	70	0	0	0	0	0	0	0	0	0	0	0	0	0	0	0	0	0	0	0	0.902	0.896	0.838	0.625	2.534	0.740	0.705	0.000	0.000	0.000	0.000	0.000	0.000	0.000	0.000	0.000	0.000	0.000	0.000	0.000	0.000	80	474	1257	1077	-0.149	Error	Error	596	661	0	0	509	568	0	0	0	0
3	22	12	""	"iYFL056C-0"	15100	16340	120	1762	1540	867	101	107	52	93	90	0	1451	1333	685	300	317	137	80	80	0	0	0	0	0	0	0	0	0	0	0	0	0	0	0	0	0	0	0	1.443	1.393	1.419	1.353	1.903	1.364	0.837	0.000	0.000	0.000	0.000	0.000	0.000	0.000	0.000	0.000	0.000	0.000	0.000	0.000	0.000	120	672	2812	2472	0.529	Error	Error	1661	1151	0	0	1439	1033	0	0	0	0
3	1	13	""	"iYGL100W"	11110	16520	110	839	722	399	90	99	68	81	78	0	685	626	308	289	301	100	76	71	0	0	0	0	0	0	0	0	0	0	0	0	0	0	0	0	0	0	0	1.891	1.875	1.710	1.485	2.457	1.573	0.696	0.000	0.000	0.000	0.000	0.000	0.000	0.000	0.000	0.000	0.000	0.000	0.000	0.000	0.000	80	540	1145	969	0.919	Error	Error	749	396	0	0	632	337	0	0	0	0
3	2	13	""	"itH(GUG)G2"	11300	16520	110	1153	998	606	89	105	107	78	72	0	2244	1941	1163	291	315	194	76	73	0	0	0	0	0	0	0	0	0	0	0	0	0	0	0	0	0	0	0	0.545	0.551	0.538	0.514	1.771	0.520	0.867	0.000	0.000	0.000	0.000	0.000	0.000	0.000	0.000	0.000	0.000	0.000	0.000	0.000	0.000	80	517	3017	2559	-0.876	Error	Error	1064	1953	0	0	909	1650	0	0	0	0
3	3	13	""	"iYGL096W-0"	11490	16520	110	975	838	466	91	132	203	77	71	0	1249	1058	582	290	349	278	73	66	0	0	0	0	0	0	0	0	0	0	0	0	0	0	0	0	0	0	0	0.922	0.973	0.880	0.914	2.338	0.886	0.835	0.000	0.000	0.000	0.000	0.000	0.000	0.000	0.000	0.000	0.000	0.000	0.000	0.000	0.000	80	527	1843	1515	-0.117	Error	Error	884	959	0	0	747	768	0	0	0	0
3	4	13	""	"iYGL083W"	11680	16520	110	1922	1722	1036	87	139	245	81	75	0	1179	1067	547	291	350	250	77	73	0	0	0	0	0	0	0	0	0	0	0	0	0	0	0	0	0	0	0	2.066	2.107	2.078	1.938	1.857	2.058	0.800	0.000	0.000	0.000	0.000	0.000	0.000	0.000	0.000	0.000	0.000	0.000	0.000	0.000	0.000	80	513	2723	2411	1.047	Error	Error	1835	888	0	0	1635	776	0	0	0	0
3	5	13	""	"iYGL079W"	11880	16520	110	459	419	240	89	106	145	72	63	0	1733	1463	883	293	323	164	76	73	0	0	0	0	0	0	0	0	0	0	0	0	0	0	0	0	0	0	0	0.257	0.282	0.266	0.240	1.836	0.263	0.826	0.000	0.000	0.000	0.000	0.000	0.000	0.000	0.000	0.000	0.000	0.000	0.000	0.000	0.000	80	517	1810	1500	-1.960	Error	Error	370	1440	0	0	330	1170	0	0	0	0
3	6	13	""	"iYGL075C"	12070	16520	110	1182	1097	585	92	113	184	87	76	0	643	589	282	293	332	236	63	30	0	0	0	0	0	0	0	0	0	0	0	0	0	0	0	0	0	0	0	3.114	3.395	3.087	2.995	2.586	3.038	0.662	0.000	0.000	0.000	0.000	0.000	0.000	0.000	0.000	0.000	0.000	0.000	0.000	0.000	0.000	80	522	1440	1301	1.639	Error	Error	1090	350	0	0	1005	296	0	0	0	0
3	7	13	""	"iYGL056C"	12270	16530	120	1284	1171	642	90	105	115	89	84	0	1016	926	502	293	305	109	78	75	0	0	0	0	0	0	0	0	0	0	0	0	0	0	0	0	0	0	0	1.651	1.708	1.604	1.657	2.345	1.536	0.786	0.000	0.000	0.000	0.000	0.000	0.000	0.000	0.000	0.000	0.000	0.000	0.000	0.000	0.000	120	569	1917	1714	0.724	Error	Error	1194	723	0	0	1081	633	0	0	0	0
3	8	13	""	"iYGL053W"	12440	16520	110	858	736	426	92	110	104	77	75	0	832	705	418	296	315	136	67	65	0	0	0	0	0	0	0	0	0	0	0	0	0	0	0	0	0	0	0	1.429	1.575	1.371	1.392	2.512	1.196	0.749	0.000	0.000	0.000	0.000	0.000	0.000	0.000	0.000	0.000	0.000	0.000	0.000	0.000	0.000	80	469	1302	1053	0.515	Error	Error	766	536	0	0	644	409	0	0	0	0
3	9	13	""	"iYGL049C"	12650	16530	120	925	841	455	92	120	164	83	75	0	655	603	330	297	325	176	66	50	0	0	0	0	0	0	0	0	0	0	0	0	0	0	0	0	0	0	0	2.327	2.448	1.957	1.796	2.577	1.913	0.682	0.000	0.000	0.000	0.000	0.000	0.000	0.000	0.000	0.000	0.000	0.000	0.000	0.000	0.000	120	589	1191	1055	1.218	Error	Error	833	358	0	0	749	306	0	0	0	0
3	10	13	""	"iYGL036W"	12840	16530	120	261	262	125	91	94	40	82	70	0	1032	963	523	289	299	85	79	76	0	0	0	0	0	0	0	0	0	0	0	0	0	0	0	0	0	0	0	0.229	0.254	0.241	0.245	2.089	0.209	0.663	0.000	0.000	0.000	0.000	0.000	0.000	0.000	0.000	0.000	0.000	0.000	0.000	0.000	0.000	120	584	913	845	-2.128	Error	Error	170	743	0	0	171	674	0	0	0	0
3	11	13	""	"iYGL033W"	13030	16520	110	863	795	477	87	91	34	91	87	0	1181	964	618	279	292	89	72	70	0	0	0	0	0	0	0	0	0	0	0	0	0	0	0	0	0	0	0	0.860	1.034	0.911	0.813	2.210	0.896	0.826	0.000	0.000	0.000	0.000	0.000	0.000	0.000	0.000	0.000	0.000	0.000	0.000	0.000	0.000	80	491	1678	1393	-0.217	Error	Error	776	902	0	0	708	685	0	0	0	0
3	12	13	""	"iYGL029W"	13220	16540	110	323	292	159	92	96	40	78	72	0	1172	1042	627	291	305	100	75	71	0	0	0	0	0	0	0	0	0	0	0	0	0	0	0	0	0	0	0	0.262	0.266	0.260	0.253	1.636	0.236	0.773	0.000	0.000	0.000	0.000	0.000	0.000	0.000	0.000	0.000	0.000	0.000	0.000	0.000	0.000	80	510	1112	951	-1.931	Error	Error	231	881	0	0	200	751	0	0	0	0
3	13	13	""	"itT(UGU)G2"	13410	16530	120	268	267	128	96	100	39	81	75	0	586	547	271	300	309	85	71	66	0	0	0	0	0	0	0	0	0	0	0	0	0	0	0	0	0	0	0	0.601	0.692	0.560	0.574	2.785	0.446	0.540	0.000	0.000	0.000	0.000	0.000	0.000	0.000	0.000	0.000	0.000	0.000	0.000	0.000	0.000	120	539	458	418	-0.734	Error	Error	172	286	0	0	171	247	0	0	0	0
3	14	13	""	"iYGR258C-1"	13580	16540	110	458	496	341	95	112	93	76	73	0	567	589	387	301	331	206	53	36	0	0	0	0	0	0	0	0	0	0	0	0	0	0	0	0	0	0	0	1.365	1.392	1.169	1.025	3.193	0.757	0.438	0.000	0.000	0.000	0.000	0.000	0.000	0.000	0.000	0.000	0.000	0.000	0.000	0.000	0.000	80	490	629	689	0.449	Error	Error	363	266	0	0	401	288	0	0	0	0
3	15	13	""	"iYGR263C"	13790	16530	110	639	578	332	96	115	91	77	72	0	546	515	273	301	336	205	55	20	0	0	0	0	0	0	0	0	0	0	0	0	0	0	0	0	0	0	0	2.216	2.252	1.743	1.337	3.401	1.561	0.605	0.000	0.000	0.000	0.000	0.000	0.000	0.000	0.000	0.000	0.000	0.000	0.000	0.000	0.000	80	502	788	696	1.148	Error	Error	543	245	0	0	482	214	0	0	0	0
3	16	13	""	"iYGR281W"	13970	16530	110	489	485	322	94	103	51	75	73	0	2558	2246	1534	323	360	216	76	71	0	0	0	0	0	0	0	0	0	0	0	0	0	0	0	0	0	0	0	0.177	0.203	0.191	0.175	1.674	0.186	0.836	0.000	0.000	0.000	0.000	0.000	0.000	0.000	0.000	0.000	0.000	0.000	0.000	0.000	0.000	80	499	2630	2314	-2.500	Error	Error	395	2235	0	0	391	1923	0	0	0	0
3	17	13	""	"iYGR285C"	14160	16540	100	310	302	186	85	89	36	77	70	0	388	379	201	303	335	207	30	3	0	0	0	0	0	0	0	0	0	0	0	0	0	0	0	0	0	0	0	2.647	2.855	1.249	1.202	3.410	0.849	0.267	0.000	0.000	0.000	0.000	0.000	0.000	0.000	0.000	0.000	0.000	0.000	0.000	0.000	0.000	80	473	310	293	1.404	Error	Error	225	85	0	0	217	76	0	0	0	0
3	18	13	""	"iYGR288W-0"	14350	16530	110	1320	1289	955	97	108	90	85	80	0	1682	1686	1198	309	329	171	76	75	0	0	0	0	0	0	0	0	0	0	0	0	0	0	0	0	0	0	0	0.891	0.866	0.753	0.687	2.463	0.782	0.804	0.000	0.000	0.000	0.000	0.000	0.000	0.000	0.000	0.000	0.000	0.000	0.000	0.000	0.000	80	522	2596	2569	-0.167	Error	Error	1223	1373	0	0	1192	1377	0	0	0	0
3	19	13	""	"iYHL046C"	14540	16530	110	1430	1302	839	118	129	80	82	80	0	2073	1857	1154	331	356	186	78	76	0	0	0	0	0	0	0	0	0	0	0	0	0	0	0	0	0	0	0	0.753	0.776	0.676	0.574	2.137	0.710	0.840	0.000	0.000	0.000	0.000	0.000	0.000	0.000	0.000	0.000	0.000	0.000	0.000	0.000	0.000	80	526	3054	2710	-0.409	Error	Error	1312	1742	0	0	1184	1526	0	0	0	0
3	20	13	""	"iYHL042W"	14740	16530	110	877	1119	970	110	118	58	80	78	0	930	933	672	308	327	143	75	68	0	0	0	0	0	0	0	0	0	0	0	0	0	0	0	0	0	0	0	1.233	1.614	1.356	1.082	2.852	1.506	0.763	0.000	0.000	0.000	0.000	0.000	0.000	0.000	0.000	0.000	0.000	0.000	0.000	0.000	0.000	80	545	1389	1634	0.302	Error	Error	767	622	0	0	1009	625	0	0	0	0
3	21	13	""	"iYHL038C"	14940	16530	110	943	832	533	102	113	65	82	76	0	860	869	837	307	324	129	71	68	0	0	0	0	0	0	0	0	0	0	0	0	0	0	0	0	0	0	0	1.521	1.299	1.241	0.923	2.881	0.830	0.498	0.000	0.000	0.000	0.000	0.000	0.000	0.000	0.000	0.000	0.000	0.000	0.000	0.000	0.000	80	544	1394	1292	0.605	Error	Error	841	553	0	0	730	562	0	0	0	0
3	22	13	""	"itH(GUG)H"	15130	16530	110	236	220	106	95	102	43	73	61	0	531	499	260	302	309	86	68	57	0	0	0	0	0	0	0	0	0	0	0	0	0	0	0	0	0	0	0	0.616	0.635	0.430	0.463	3.122	0.320	0.367	0.000	0.000	0.000	0.000	0.000	0.000	0.000	0.000	0.000	0.000	0.000	0.000	0.000	0.000	80	541	370	322	-0.700	Error	Error	141	229	0	0	125	197	0	0	0	0
3	1	14	""	"iYHL019C"	11130	16720	110	387	372	229	92	100	55	75	67	0	412	404	241	291	302	93	57	40	0	0	0	0	0	0	0	0	0	0	0	0	0	0	0	0	0	0	0	2.438	2.478	1.630	1.258	3.469	1.129	0.397	0.000	0.000	0.000	0.000	0.000	0.000	0.000	0.000	0.000	0.000	0.000	0.000	0.000	0.000	80	571	416	393	1.286	Error	Error	295	121	0	0	280	113	0	0	0	0
3	2	14	""	"iYHL015W"	11320	16710	110	263	274	132	93	106	91	77	45	0	764	760	443	303	323	185	66	57	0	0	0	0	0	0	0	0	0	0	0	0	0	0	0	0	0	0	0	0.369	0.396	0.334	0.402	2.473	0.277	0.592	0.000	0.000	0.000	0.000	0.000	0.000	0.000	0.000	0.000	0.000	0.000	0.000	0.000	0.000	80	538	631	638	-1.439	Error	Error	170	461	0	0	181	457	0	0	0	0
3	3	14	""	"iYIL118W"	11510	16720	100	470	428	209	89	98	78	81	73	0	1161	1012	607	290	313	138	71	71	0	0	0	0	0	0	0	0	0	0	0	0	0	0	0	0	0	0	0	0.437	0.470	0.437	0.398	2.195	0.376	0.767	0.000	0.000	0.000	0.000	0.000	0.000	0.000	0.000	0.000	0.000	0.000	0.000	0.000	0.000	80	490	1252	1061	-1.193	Error	Error	381	871	0	0	339	722	0	0	0	0
3	4	14	""	"iYIL114C"	11720	16720	120	453	509	331	81	96	142	80	64	0	440	453	238	277	298	132	54	32	0	0	0	0	0	0	0	0	0	0	0	0	0	0	0	0	0	0	0	2.282	2.432	1.915	2.136	3.097	1.972	0.466	0.000	0.000	0.000	0.000	0.000	0.000	0.000	0.000	0.000	0.000	0.000	0.000	0.000	0.000	120	611	535	604	1.190	Error	Error	372	163	0	0	428	176	0	0	0	0
3	5	14	""	"iYIL110W"	11900	16720	110	324	298	150	87	89	33	80	75	0	1541	1289	780	281	300	124	75	73	0	0	0	0	0	0	0	0	0	0	0	0	0	0	0	0	0	0	0	0.188	0.209	0.196	0.219	2.478	0.184	0.775	0.000	0.000	0.000	0.000	0.000	0.000	0.000	0.000	0.000	0.000	0.000	0.000	0.000	0.000	80	484	1497	1219	-2.410	Error	Error	237	1260	0	0	211	1008	0	0	0	0
3	6	14	""	"iYIL096C"	12080	16720	110	481	406	217	94	101	69	75	68	0	659	638	351	289	311	118	73	70	0	0	0	0	0	0	0	0	0	0	0	0	0	0	0	0	0	0	0	1.046	0.894	0.794	0.628	2.459	0.675	0.690	0.000	0.000	0.000	0.000	0.000	0.000	0.000	0.000	0.000	0.000	0.000	0.000	0.000	0.000	80	519	757	661	0.065	Error	Error	387	370	0	0	312	349	0	0	0	0
3	7	14	""	"iYIL093C"	12280	16720	110	689	653	447	96	106	53	78	75	0	649	578	344	299	314	109	70	65	0	0	0	0	0	0	0	0	0	0	0	0	0	0	0	0	0	0	0	1.694	1.996	1.468	1.074	2.934	1.599	0.693	0.000	0.000	0.000	0.000	0.000	0.000	0.000	0.000	0.000	0.000	0.000	0.000	0.000	0.000	80	479	943	836	0.761	Error	Error	593	350	0	0	557	279	0	0	0	0
3	8	14	""	"iYIL089W"	12450	16720	110	916	813	496	98	117	96	80	77	0	1580	1394	991	297	330	211	68	66	0	0	0	0	0	0	0	0	0	0	0	0	0	0	0	0	0	0	0	0.638	0.652	0.579	0.587	2.549	0.511	0.825	0.000	0.000	0.000	0.000	0.000	0.000	0.000	0.000	0.000	0.000	0.000	0.000	0.000	0.000	80	512	2101	1812	-0.649	Error	Error	818	1283	0	0	715	1097	0	0	0	0
3	9	14	""	"iYIL072W"	12660	16720	110	788	741	455	95	109	76	78	77	0	2282	1968	1275	305	341	220	76	71	0	0	0	0	0	0	0	0	0	0	0	0	0	0	0	0	0	0	0	0.351	0.388	0.370	0.387	2.284	0.355	0.842	0.000	0.000	0.000	0.000	0.000	0.000	0.000	0.000	0.000	0.000	0.000	0.000	0.000	0.000	80	509	2670	2309	-1.512	Error	Error	693	1977	0	0	646	1663	0	0	0	0
3	10	14	""	"iYIL068C"	12840	16720	110	478	464	278	97	106	55	76	72	0	594	540	301	309	327	125	68	55	0	0	0	0	0	0	0	0	0	0	0	0	0	0	0	0	0	0	0	1.337	1.589	1.192	1.066	2.452	1.075	0.557	0.000	0.000	0.000	0.000	0.000	0.000	0.000	0.000	0.000	0.000	0.000	0.000	0.000	0.000	80	488	666	598	0.419	Error	Error	381	285	0	0	367	231	0	0	0	0
3	11	14	""	"iYIL063C"	13030	16720	110	452	423	238	97	107	56	78	73	0	519	463	233	297	309	93	63	55	0	0	0	0	0	0	0	0	0	0	0	0	0	0	0	0	0	0	0	1.599	1.964	1.289	1.238	3.161	1.256	0.451	0.000	0.000	0.000	0.000	0.000	0.000	0.000	0.000	0.000	0.000	0.000	0.000	0.000	0.000	80	521	577	492	0.677	Error	Error	355	222	0	0	326	166	0	0	0	0
3	12	14	""	"iYIL046W"	13220	16720	110	1342	1159	636	101	123	124	82	82	0	1128	1043	567	310	338	179	77	72	0	0	0	0	0	0	0	0	0	0	0	0	0	0	0	0	0	0	0	1.517	1.443	1.288	1.116	2.509	1.210	0.788	0.000	0.000	0.000	0.000	0.000	0.000	0.000	0.000	0.000	0.000	0.000	0.000	0.000	0.000	80	510	2059	1791	0.601	Error	Error	1241	818	0	0	1058	733	0	0	0	0
3	13	14	""	"iYIL042C"	13420	16720	110	618	523	305	104	125	118	72	66	0	529	496	250	308	335	174	57	27	0	0	0	0	0	0	0	0	0	0	0	0	0	0	0	0	0	0	0	2.326	2.229	1.562	1.312	3.188	1.705	0.470	0.000	0.000	0.000	0.000	0.000	0.000	0.000	0.000	0.000	0.000	0.000	0.000	0.000	0.000	80	504	735	607	1.218	Error	Error	514	221	0	0	419	188	0	0	0	0
3	14	14	""	"iYIL038C"	13600	16720	110	649	613	359	97	108	55	80	77	0	482	461	245	299	325	188	46	18	0	0	0	0	0	0	0	0	0	0	0	0	0	0	0	0	0	0	0	3.016	3.185	2.548	1.717	3.891	2.128	0.396	0.000	0.000	0.000	0.000	0.000	0.000	0.000	0.000	0.000	0.000	0.000	0.000	0.000	0.000	80	503	735	678	1.593	Error	Error	552	183	0	0	516	162	0	0	0	0
3	15	14	""	"iYJL014W"	13810	16720	120	680	588	370	96	106	53	85	77	0	4531	3860	2517	311	330	128	85	82	0	0	0	0	0	0	0	0	0	0	0	0	0	0	0	0	0	0	0	0.138	0.139	0.136	0.143	1.953	0.133	0.850	0.000	0.000	0.000	0.000	0.000	0.000	0.000	0.000	0.000	0.000	0.000	0.000	0.000	0.000	120	563	4804	4041	-2.853	Error	Error	584	4220	0	0	492	3549	0	0	0	0
3	16	14	""	"itK(CUU)J"	13980	16720	110	579	509	295	95	103	62	78	75	0	1870	1582	972	314	356	251	73	72	0	0	0	0	0	0	0	0	0	0	0	0	0	0	0	0	0	0	0	0.311	0.326	0.311	0.307	1.874	0.286	0.806	0.000	0.000	0.000	0.000	0.000	0.000	0.000	0.000	0.000	0.000	0.000	0.000	0.000	0.000	80	472	2040	1682	-1.685	Error	Error	484	1556	0	0	414	1268	0	0	0	0
3	17	14	""	"iYJL010C"	14170	16730	110	480	413	206	76	86	62	82	75	0	823	717	362	276	309	215	72	62	0	0	0	0	0	0	0	0	0	0	0	0	0	0	0	0	0	0	0	0.739	0.764	0.707	0.682	1.537	0.627	0.753	0.000	0.000	0.000	0.000	0.000	0.000	0.000	0.000	0.000	0.000	0.000	0.000	0.000	0.000	80	464	951	778	-0.437	Error	Error	404	547	0	0	337	441	0	0	0	0
3	18	14	""	"iYJR005W"	14360	16730	110	2010	1722	969	105	134	133	87	83	0	3280	2775	1448	310	375	353	86	81	0	0	0	0	0	0	0	0	0	0	0	0	0	0	0	0	0	0	0	0.641	0.656	0.663	0.636	1.627	0.636	0.870	0.000	0.000	0.000	0.000	0.000	0.000	0.000	0.000	0.000	0.000	0.000	0.000	0.000	0.000	80	500	4875	4082	-0.641	Error	Error	1905	2970	0	0	1617	2465	0	0	0	0
3	19	14	""	"iYJR009C-0"	14560	16720	110	964	843	486	145	181	149	75	72	0	1123	1028	587	386	467	362	70	51	0	0	0	0	0	0	0	0	0	0	0	0	0	0	0	0	0	0	0	1.111	1.087	0.977	0.779	2.801	0.894	0.791	0.000	0.000	0.000	0.000	0.000	0.000	0.000	0.000	0.000	0.000	0.000	0.000	0.000	0.000	80	521	1556	1340	0.152	Error	Error	819	737	0	0	698	642	0	0	0	0
3	20	14	""	"iYJR011C"	14740	16720	110	1286	1145	603	83	110	133	87	81	0	1858	1665	858	289	341	237	83	75	0	0	0	0	0	0	0	0	0	0	0	0	0	0	0	0	0	0	0	0.767	0.772	0.823	0.857	1.971	0.712	0.860	0.000	0.000	0.000	0.000	0.000	0.000	0.000	0.000	0.000	0.000	0.000	0.000	0.000	0.000	80	508	2772	2438	-0.383	Error	Error	1203	1569	0	0	1062	1376	0	0	0	0
3	21	14	""	"iYJR035W"	14930	16720	110	419	389	236	86	109	112	70	66	0	1203	1031	657	288	344	248	70	67	0	0	0	0	0	0	0	0	0	0	0	0	0	0	0	0	0	0	0	0.364	0.408	0.333	0.307	1.949	0.341	0.800	0.000	0.000	0.000	0.000	0.000	0.000	0.000	0.000	0.000	0.000	0.000	0.000	0.000	0.000	80	506	1248	1046	-1.458	Error	Error	333	915	0	0	303	743	0	0	0	0
3	22	14	""	"iYJR041C"	15120	16730	120	774	799	519	93	102	49	88	83	0	709	643	377	298	321	148	65	58	0	0	0	0	0	0	0	0	0	0	0	0	0	0	0	0	0	0	0	1.657	2.046	1.727	1.659	2.982	1.652	0.613	0.000	0.000	0.000	0.000	0.000	0.000	0.000	0.000	0.000	0.000	0.000	0.000	0.000	0.000	120	623	1092	1051	0.729	Error	Error	681	411	0	0	706	345	0	0	0	0
3	1	15	""	"iYJRWdelta14"	11130	16910	110	1077	921	482	84	88	41	98	92	0	1298	1195	592	284	299	102	83	81	0	0	0	0	0	0	0	0	0	0	0	0	0	0	0	0	0	0	0	0.979	0.919	0.968	0.925	1.601	0.857	0.852	0.000	0.000	0.000	0.000	0.000	0.000	0.000	0.000	0.000	0.000	0.000	0.000	0.000	0.000	80	550	2007	1748	-0.030	Error	Error	993	1014	0	0	837	911	0	0	0	0
3	2	15	""	"itR(CCU)J"	11320	16910	110	196	186	78	89	93	40	71	57	0	581	539	295	292	307	106	70	63	0	0	0	0	0	0	0	0	0	0	0	0	0	0	0	0	0	0	0	0.370	0.393	0.290	0.315	2.437	0.221	0.424	0.000	0.000	0.000	0.000	0.000	0.000	0.000	0.000	0.000	0.000	0.000	0.000	0.000	0.000	80	496	396	344	-1.433	Error	Error	107	289	0	0	97	247	0	0	0	0
3	3	15	""	"iYJR056C"	11500	16910	110	1287	1181	679	88	107	139	83	77	0	1072	1001	531	295	320	155	80	75	0	0	0	0	0	0	0	0	0	0	0	0	0	0	0	0	0	0	0	1.543	1.548	1.447	1.508	1.483	1.457	0.836	0.000	0.000	0.000	0.000	0.000	0.000	0.000	0.000	0.000	0.000	0.000	0.000	0.000	0.000	80	486	1976	1799	0.626	Error	Error	1199	777	0	0	1093	706	0	0	0	0
3	4	15	""	"iYJR059W"	11690	16910	110	1632	1421	663	77	104	153	96	88	0	983	930	402	274	296	158	83	81	0	0	0	0	0	0	0	0	0	0	0	0	0	0	0	0	0	0	0	2.193	2.049	1.946	1.997	1.397	2.016	0.814	0.000	0.000	0.000	0.000	0.000	0.000	0.000	0.000	0.000	0.000	0.000	0.000	0.000	0.000	80	483	2264	2000	1.133	Error	Error	1555	709	0	0	1344	656	0	0	0	0
3	5	15	""	"iYKL044W"	11880	16900	110	424	383	191	84	96	73	80	75	0	488	441	236	273	287	97	62	53	0	0	0	0	0	0	0	0	0	0	0	0	0	0	0	0	0	0	0	1.581	1.780	1.270	1.286	3.200	1.046	0.480	0.000	0.000	0.000	0.000	0.000	0.000	0.000	0.000	0.000	0.000	0.000	0.000	0.000	0.000	80	484	555	467	0.661	Error	Error	340	215	0	0	299	168	0	0	0	0
3	6	15	""	"iYKL040C"	12070	16910	120	1978	1767	990	90	97	42	95	93	0	1040	945	506	285	300	95	79	77	0	0	0	0	0	0	0	0	0	0	0	0	0	0	0	0	0	0	0	2.501	2.541	2.276	2.306	2.329	2.375	0.771	0.000	0.000	0.000	0.000	0.000	0.000	0.000	0.000	0.000	0.000	0.000	0.000	0.000	0.000	120	523	2643	2337	1.322	Error	Error	1888	755	0	0	1677	660	0	0	0	0
3	7	15	""	"iYKL035W"	12260	16910	120	1265	1158	672	92	100	52	91	89	0	860	823	461	289	301	99	80	73	0	0	0	0	0	0	0	0	0	0	0	0	0	0	0	0	0	0	0	2.054	1.996	1.918	1.745	2.311	1.748	0.785	0.000	0.000	0.000	0.000	0.000	0.000	0.000	0.000	0.000	0.000	0.000	0.000	0.000	0.000	120	511	1744	1600	1.039	Error	Error	1173	571	0	0	1066	534	0	0	0	0
3	8	15	""	"iYKL019W"	12450	16910	120	1585	1677	1235	95	106	66	91	85	0	1260	1302	915	293	308	114	79	74	0	0	0	0	0	0	0	0	0	0	0	0	0	0	0	0	0	0	0	1.541	1.568	1.601	1.559	2.201	1.460	0.855	0.000	0.000	0.000	0.000	0.000	0.000	0.000	0.000	0.000	0.000	0.000	0.000	0.000	0.000	120	507	2457	2591	0.624	Error	Error	1490	967	0	0	1582	1009	0	0	0	0
3	9	15	""	"iYKL015W"	12620	16900	110	459	428	227	97	108	54	80	76	0	2854	2473	1551	299	354	351	76	73	0	0	0	0	0	0	0	0	0	0	0	0	0	0	0	0	0	0	0	0.142	0.152	0.152	0.157	2.145	0.137	0.848	0.000	0.000	0.000	0.000	0.000	0.000	0.000	0.000	0.000	0.000	0.000	0.000	0.000	0.000	80	474	2917	2505	-2.819	Error	Error	362	2555	0	0	331	2174	0	0	0	0
3	10	15	""	"iYKL011C"	12810	16900	110	269	242	137	99	110	56	67	58	0	835	751	491	306	368	348	62	35	0	0	0	0	0	0	0	0	0	0	0	0	0	0	0	0	0	0	0	0.321	0.321	0.295	0.263	2.070	0.249	0.638	0.000	0.000	0.000	0.000	0.000	0.000	0.000	0.000	0.000	0.000	0.000	0.000	0.000	0.000	80	510	699	588	-1.638	Error	Error	170	529	0	0	143	445	0	0	0	0
3	11	15	""	"iYKR004C"	13020	16910	120	928	914	562	102	107	46	84	82	0	6047	5340	3712	299	318	122	82	78	0	0	0	0	0	0	0	0	0	0	0	0	0	0	0	0	0	0	0	0.144	0.161	0.158	0.188	2.202	0.151	0.857	0.000	0.000	0.000	0.000	0.000	0.000	0.000	0.000	0.000	0.000	0.000	0.000	0.000	0.000	120	535	6574	5853	-2.799	Error	Error	826	5748	0	0	812	5041	0	0	0	0
3	12	15	""	"iYKR008W"	13200	16910	120	569	540	330	106	115	99	75	68	0	3287	3021	2132	311	336	163	78	74	0	0	0	0	0	0	0	0	0	0	0	0	0	0	0	0	0	0	0	0.156	0.160	0.163	0.203	2.445	0.147	0.853	0.000	0.000	0.000	0.000	0.000	0.000	0.000	0.000	0.000	0.000	0.000	0.000	0.000	0.000	120	480	3439	3144	-2.684	Error	Error	463	2976	0	0	434	2710	0	0	0	0
3	13	15	""	"iYKR010C"	13370	16900	110	803	707	372	104	122	106	82	82	0	583	591	331	310	338	163	65	46	0	0	0	0	0	0	0	0	0	0	0	0	0	0	0	0	0	0	0	2.560	2.146	1.491	1.270	3.058	1.543	0.504	0.000	0.000	0.000	0.000	0.000	0.000	0.000	0.000	0.000	0.000	0.000	0.000	0.000	0.000	80	487	972	884	1.356	Error	Error	699	273	0	0	603	281	0	0	0	0
3	14	15	""	"iYKRWdelta10"	13570	16900	110	303	284	160	99	117	92	67	56	0	407	378	226	301	315	117	47	26	0	0	0	0	0	0	0	0	0	0	0	0	0	0	0	0	0	0	0	1.925	2.403	1.021	0.718	3.938	0.726	0.358	0.000	0.000	0.000	0.000	0.000	0.000	0.000	0.000	0.000	0.000	0.000	0.000	0.000	0.000	80	513	310	262	0.945	Error	Error	204	106	0	0	185	77	0	0	0	0
3	15	15	""	"iYKR030W"	13760	16900	110	459	410	228	97	105	47	78	75	0	1258	1051	690	301	323	149	67	66	0	0	0	0	0	0	0	0	0	0	0	0	0	0	0	0	0	0	0	0.378	0.417	0.328	0.329	1.915	0.342	0.795	0.000	0.000	0.000	0.000	0.000	0.000	0.000	0.000	0.000	0.000	0.000	0.000	0.000	0.000	80	506	1319	1063	-1.403	Error	Error	362	957	0	0	313	750	0	0	0	0
3	16	15	""	"iYKR036C"	13950	16900	110	413	376	180	97	113	73	81	76	0	522	463	217	298	330	199	55	12	0	0	0	0	0	0	0	0	0	0	0	0	0	0	0	0	0	0	0	1.411	1.691	1.169	0.920	3.125	0.978	0.452	0.000	0.000	0.000	0.000	0.000	0.000	0.000	0.000	0.000	0.000	0.000	0.000	0.000	0.000	80	507	540	444	0.496	Error	Error	316	224	0	0	279	165	0	0	0	0
3	17	15	""	"iYLR155C-0"	14160	16900	150	92	103	52	95	107	66	11	3	0	291	313	165	295	342	332	5	0	0	0	0	0	0	0	0	0	0	0	0	0	0	0	0	0	0	0	0	0.750	0.444	0.232	0.298	3.672	0.180	0.121	0.000	0.000	0.000	0.000	0.000	0.000	0.000	0.000	0.000	0.000	0.000	0.000	0.000	0.000	156	678	-7	26	-0.415	Error	Error	-3	-4	0	0	8	18	0	0	-50	0
[truncated: 4,319,075 more chars]
