# Supplementary material for: Genome-Wide Mapping of the Cohesin Complex in the Yeast Saccharomyces cerevisiae
Source: PLoS Biol. 2004 Jul 27;2(9):e259. doi: 10.1371/journal.pbio.0020259 (PMC490026; doi:10.1371/journal.pbio.0020259)
Supplement: Dataset S11 — Cy3 = ChIP cdc16-ts Mcd1-6HA in A364a; Cy5 = genomic DNA. (4.6 MB XLS). [file pbio.0020259.sd011.xls]

ATF	1.0
27	82    
"Type=GenePix Results 2"
"DateTime=2003/04/19 11:26:48"
"Settings=L:\cohesin3\UP2_184.gps"
"GalFile=L:\arraying&printing\P2uber022803.GAL"
"PixelSize=10"
"Wavelengths=635	532"
"ImageFiles=L:\cohesin3\UP2_184_635.tif 0	L:\cohesin3\UP2_184_532.tif 0"
"NormalizationMethod=None"
"NormalizationFactors=1	1"
"JpegImage="
"RatioFormulations=W1/W2 (635/532)"
"Barcode="
"BackgroundSubtraction=LocalFeature"
"ImageOrigin=1500, 13590"
"JpegOrigin=1760, 14150"
"Creator=GenePix Pro 4.0.1.9"
"Scanner=GenePix 4000B [87097]"
"FocusPosition=0"
"Temperature=30.63"
"LinesAveraged=1"
"Comment=Cy5=total gDNA Cy3=ndc10-42 mcd1HA NZ HA ChIP S288c"
"PMTGain=560	610"
"ScanPower=100	100"
"LaserPower=3.31	3.57"
"LaserOnTime=20815	20828"
"ScanRegion=150,1359,2040,4980"
"Supplier="
"Block"	"Column"	"Row"	"Name"	"ID"	"X"	"Y"	"Dia."	"F635 Median"	"F635 Mean"	"F635 SD"	"B635 Median"	"B635 Mean"	"B635 SD"	"% > B635+1SD"	"% > B635+2SD"	"F635 % Sat."	"F532 Median"	"F532 Mean"	"F532 SD"	"B532 Median"	"B532 Mean"	"B532 SD"	"% > B532+1SD"	"% > B532+2SD"	"F532 % Sat."	"F3 Median"	"F3 Mean"	"F3 SD"	"B3 Median"	"B3 Mean"	"B3 SD"	"% > B3+1SD"	"% > B3+2SD"	"F3 % Sat."	"F4 Median"	"F4 Mean"	"F4 SD"	"B4 Median"	"B4 Mean"	"B4 SD"	"% > B4+1SD"	"% > B4+2SD"	"F4 % Sat."	"Ratio of Medians (635/532)"	"Ratio of Means (635/532)"	"Median of Ratios (635/532)"	"Mean of Ratios (635/532)"	"Ratios SD (635/532)"	"Rgn Ratio (635/532)"	"Rgn R� (635/532)"	"Ratio of Medians (Ratio/2)"	"Ratio of Means (Ratio/2)"	"Median of Ratios (Ratio/2)"	"Mean of Ratios (Ratio/2)"	"Ratios SD (Ratio/2)"	"Rgn Ratio (Ratio/2)"	"Rgn R� (Ratio/2)"	"Ratio of Medians (Ratio/3)"	"Ratio of Means (Ratio/3)"	"Median of Ratios (Ratio/3)"	"Mean of Ratios (Ratio/3)"	"Ratios SD (Ratio/3)"	"Rgn Ratio (Ratio/3)"	"Rgn R� (Ratio/3)"	"F Pixels"	"B Pixels"	"Sum of Medians"	"Sum of Means"	"Log Ratio (635/532)"	"Log Ratio (Ratio/2)"	"Log Ratio (Ratio/3)"	"F635 Median - B635"	"F532 Median - B532"	"F3 Median - B3"	"F4 Median - B4"	"F635 Mean - B635"	"F532 Mean - B532"	"F3 Mean - B3"	"F4 Mean - B4"	"Flags"	"Normalize"
1	1	1	"cdc27"	"YBL084C"	2040	14480	120	3194	2928	1273	60	62	22	99	99	0	6185	5624	2550	222	225	68	100	99	0	0	0	0	0	0	0	0	0	0	0	0	0	0	0	0	0	0	0	0.526	0.531	0.513	0.542	2.082	0.492	0.808	0.000	0.000	0.000	0.000	0.000	0.000	0.000	0.000	0.000	0.000	0.000	0.000	0.000	0.000	120	607	9097	8270	-0.928	Error	Error	3134	5963	0	0	2868	5402	0	0	0	0
1	2	1	""	"YBL113C"	2220	14480	120	33237	27618	12312	65	70	32	100	100	0	30248	26126	10839	226	234	72	100	100	0	0	0	0	0	0	0	0	0	0	0	0	0	0	0	0	0	0	0	1.105	1.064	1.060	0.992	2.205	1.072	0.836	0.000	0.000	0.000	0.000	0.000	0.000	0.000	0.000	0.000	0.000	0.000	0.000	0.000	0.000	120	588	63194	53453	0.144	Error	Error	33172	30022	0	0	27553	25900	0	0	0	0
1	3	1	""	"YBR030W"	2410	14480	110	5053	4827	3311	71	203	825	82	77	0	4504	4132	2459	231	357	729	82	75	0	0	0	0	0	0	0	0	0	0	0	0	0	0	0	0	0	0	0	1.166	1.219	1.142	1.226	2.379	1.261	0.758	0.000	0.000	0.000	0.000	0.000	0.000	0.000	0.000	0.000	0.000	0.000	0.000	0.000	0.000	80	542	9255	8657	0.221	Error	Error	4982	4273	0	0	4756	3901	0	0	0	0
1	4	1	""	"YBL086C"	2600	14470	110	3810	3484	1672	81	270	910	88	78	0	3088	3127	3775	238	409	788	80	76	0	0	0	0	0	0	0	0	0	0	0	0	0	0	0	0	0	0	0	1.308	1.178	1.396	1.448	2.559	0.724	0.375	0.000	0.000	0.000	0.000	0.000	0.000	0.000	0.000	0.000	0.000	0.000	0.000	0.000	0.000	80	539	6579	6292	0.388	Error	Error	3729	2850	0	0	3403	2889	0	0	0	0
1	5	1	"RER2"	"YBR002C"	2790	14480	120	4840	4397	1633	80	132	370	95	95	0	4217	3864	1657	233	278	299	92	88	0	0	0	0	0	0	0	0	0	0	0	0	0	0	0	0	0	0	0	1.195	1.189	1.167	1.272	2.309	1.174	0.793	0.000	0.000	0.000	0.000	0.000	0.000	0.000	0.000	0.000	0.000	0.000	0.000	0.000	0.000	120	634	8744	7948	0.257	Error	Error	4760	3984	0	0	4317	3631	0	0	0	0
1	6	1	""	"YBR032W"	3010	14490	150	89	111	72	68	74	31	41	28	0	242	307	201	223	263	976	0	0	0	0	0	0	0	0	0	0	0	0	0	0	0	0	0	0	0	0	0	1.105	0.512	0.487	0.547	3.288	0.207	0.272	0.000	0.000	0.000	0.000	0.000	0.000	0.000	0.000	0.000	0.000	0.000	0.000	0.000	0.000	156	843	40	127	0.144	Error	Error	21	19	0	0	43	84	0	0	-50	0
1	7	1	"tel1"	"YBL088C"	3170	14470	110	277	263	113	67	70	29	90	82	0	493	501	247	223	227	95	80	65	0	0	0	0	0	0	0	0	0	0	0	0	0	0	0	0	0	0	0	0.778	0.705	0.606	0.638	2.142	0.417	0.493	0.000	0.000	0.000	0.000	0.000	0.000	0.000	0.000	0.000	0.000	0.000	0.000	0.000	0.000	80	434	480	474	-0.363	Error	Error	210	270	0	0	196	278	0	0	0	0
1	8	1	""	"YBR004C"	3350	14470	120	5032	4476	1694	66	71	34	100	100	0	9025	8139	3409	230	240	94	99	99	0	0	0	0	0	0	0	0	0	0	0	0	0	0	0	0	0	0	0	0.565	0.558	0.528	0.572	1.996	0.511	0.866	0.000	0.000	0.000	0.000	0.000	0.000	0.000	0.000	0.000	0.000	0.000	0.000	0.000	0.000	120	604	13761	12319	-0.825	Error	Error	4966	8795	0	0	4410	7909	0	0	0	0
1	9	1	"HMT1"	"YBR034C"	3550	14470	120	6279	5938	2563	73	80	70	100	99	0	8433	7831	3338	239	255	135	98	98	0	0	0	0	0	0	0	0	0	0	0	0	0	0	0	0	0	0	0	0.757	0.773	0.775	0.774	1.587	0.755	0.855	0.000	0.000	0.000	0.000	0.000	0.000	0.000	0.000	0.000	0.000	0.000	0.000	0.000	0.000	120	583	14400	13457	-0.401	Error	Error	6206	8194	0	0	5865	7592	0	0	0	0
1	10	1	"MRP21"	"YBL090W"	3730	14480	120	8570	7316	3294	82	86	37	100	100	0	8878	7346	3754	246	261	89	99	96	0	0	0	0	0	0	0	0	0	0	0	0	0	0	0	0	0	0	0	0.983	1.019	0.987	1.133	2.185	0.956	0.861	0.000	0.000	0.000	0.000	0.000	0.000	0.000	0.000	0.000	0.000	0.000	0.000	0.000	0.000	120	555	17120	14334	-0.024	Error	Error	8488	8632	0	0	7234	7100	0	0	0	0
1	11	1	""	"YBR006W"	3920	14480	120	6736	6013	2553	82	88	39	100	100	0	14958	13052	6600	253	266	91	100	98	0	0	0	0	0	0	0	0	0	0	0	0	0	0	0	0	0	0	0	0.452	0.463	0.461	0.533	2.712	0.416	0.823	0.000	0.000	0.000	0.000	0.000	0.000	0.000	0.000	0.000	0.000	0.000	0.000	0.000	0.000	120	589	21359	18730	-1.144	Error	Error	6654	14705	0	0	5931	12799	0	0	0	0
1	12	1	"CSG2"	"YBR036C"	4120	14510	120	5597	4952	2170	80	85	35	100	100	0	7833	6933	3364	246	257	84	97	97	0	0	0	0	0	0	0	0	0	0	0	0	0	0	0	0	0	0	0	0.727	0.729	0.718	0.847	3.033	0.680	0.806	0.000	0.000	0.000	0.000	0.000	0.000	0.000	0.000	0.000	0.000	0.000	0.000	0.000	0.000	120	547	13104	11559	-0.460	Error	Error	5517	7587	0	0	4872	6687	0	0	0	0
1	13	1	""	"YCL048W"	4300	14500	120	6967	6086	2514	73	76	29	100	100	0	14212	13029	5482	239	246	72	100	99	0	0	0	0	0	0	0	0	0	0	0	0	0	0	0	0	0	0	0	0.493	0.470	0.458	0.472	2.166	0.443	0.864	0.000	0.000	0.000	0.000	0.000	0.000	0.000	0.000	0.000	0.000	0.000	0.000	0.000	0.000	120	556	20867	18803	-1.019	Error	Error	6894	13973	0	0	6013	12790	0	0	0	0
1	14	1	""	"YCR010C"	4500	14500	120	7635	6845	2507	73	75	27	100	100	0	14676	13123	5492	242	246	71	100	100	0	0	0	0	0	0	0	0	0	0	0	0	0	0	0	0	0	0	0	0.524	0.526	0.528	0.547	2.123	0.489	0.851	0.000	0.000	0.000	0.000	0.000	0.000	0.000	0.000	0.000	0.000	0.000	0.000	0.000	0.000	120	575	21996	19653	-0.933	Error	Error	7562	14434	0	0	6772	12881	0	0	0	0
1	15	1	"bud5"	"YCR038C"	4690	14500	120	7238	7352	3560	79	84	44	100	99	0	8339	8224	4389	251	259	89	97	96	0	0	0	0	0	0	0	0	0	0	0	0	0	0	0	0	0	0	0	0.885	0.912	0.912	1.015	2.340	0.856	0.814	0.000	0.000	0.000	0.000	0.000	0.000	0.000	0.000	0.000	0.000	0.000	0.000	0.000	0.000	120	554	15247	15246	-0.176	Error	Error	7159	8088	0	0	7273	7973	0	0	0	0
1	16	1	"apa1"	"YCL050C"	4890	14500	120	7509	6556	2623	79	106	283	97	95	0	18594	16987	6656	253	293	380	100	98	0	0	0	0	0	0	0	0	0	0	0	0	0	0	0	0	0	0	0	0.405	0.387	0.399	0.365	2.019	0.359	0.812	0.000	0.000	0.000	0.000	0.000	0.000	0.000	0.000	0.000	0.000	0.000	0.000	0.000	0.000	120	572	25771	23211	-1.304	Error	Error	7430	18341	0	0	6477	16734	0	0	0	0
1	17	1	"PGK1"	"YCR012W"	5070	14500	120	4039	3432	1412	79	85	43	100	97	0	5614	5039	2016	242	253	74	100	100	0	0	0	0	0	0	0	0	0	0	0	0	0	0	0	0	0	0	0	0.737	0.699	0.708	0.668	2.040	0.682	0.798	0.000	0.000	0.000	0.000	0.000	0.000	0.000	0.000	0.000	0.000	0.000	0.000	0.000	0.000	120	532	9332	8150	-0.440	Error	Error	3960	5372	0	0	3353	4797	0	0	0	0
1	18	1	"MATalpha1"	"YCR040W"	5260	14500	150	6496	5087	3098	81	123	355	85	82	0	8588	6846	3975	248	345	747	85	77	0	0	0	0	0	0	0	0	0	0	0	0	0	0	0	0	0	0	0	0.769	0.759	0.745	0.699	2.794	0.753	0.812	0.000	0.000	0.000	0.000	0.000	0.000	0.000	0.000	0.000	0.000	0.000	0.000	0.000	0.000	156	784	14755	11604	-0.379	Error	Error	6415	8340	0	0	5006	6598	0	0	0	0
1	19	1	"PBN1"	"YCL052C"	5460	14510	130	5138	4594	2141	85	96	119	97	96	0	14810	13444	6790	258	305	520	93	90	0	0	0	0	0	0	0	0	0	0	0	0	0	0	0	0	0	0	0	0.347	0.342	0.346	0.380	2.515	0.308	0.821	0.000	0.000	0.000	0.000	0.000	0.000	0.000	0.000	0.000	0.000	0.000	0.000	0.000	0.000	120	568	19605	17695	-1.526	Error	Error	5053	14552	0	0	4509	13186	0	0	0	0
1	20	1	"POL4"	"YCR014C"	5630	14500	130	5676	5057	2253	83	92	57	99	95	0	11273	10347	4660	266	295	244	98	94	0	0	0	0	0	0	0	0	0	0	0	0	0	0	0	0	0	0	0	0.508	0.493	0.493	0.510	2.323	0.455	0.802	0.000	0.000	0.000	0.000	0.000	0.000	0.000	0.000	0.000	0.000	0.000	0.000	0.000	0.000	120	594	16600	15055	-0.977	Error	Error	5593	11007	0	0	4974	10081	0	0	0	0
1	21	1	"TSM1"	"YCR042C"	5830	14500	130	1922	1904	969	86	95	57	97	95	0	3060	2854	1395	276	300	237	90	87	0	0	0	0	0	0	0	0	0	0	0	0	0	0	0	0	0	0	0	0.659	0.705	0.723	0.704	2.256	0.668	0.732	0.000	0.000	0.000	0.000	0.000	0.000	0.000	0.000	0.000	0.000	0.000	0.000	0.000	0.000	120	637	4620	4396	-0.601	Error	Error	1836	2784	0	0	1818	2578	0	0	0	0
1	22	1	"KAR4"	"YCL055W"	6000	14500	110	4491	3993	1799	96	225	729	90	83	0	6617	6191	2764	280	514	1278	88	85	0	0	0	0	0	0	0	0	0	0	0	0	0	0	0	0	0	0	0	0.694	0.659	0.625	0.656	1.826	0.619	0.860	0.000	0.000	0.000	0.000	0.000	0.000	0.000	0.000	0.000	0.000	0.000	0.000	0.000	0.000	80	522	10732	9808	-0.528	Error	Error	4395	6337	0	0	3897	5911	0	0	0	0
1	1	2	""	"YCR016W"	2030	14690	120	4775	4327	2022	62	65	30	100	100	0	9514	8431	3975	222	229	73	100	98	0	0	0	0	0	0	0	0	0	0	0	0	0	0	0	0	0	0	0	0.507	0.520	0.514	0.529	2.675	0.468	0.753	0.000	0.000	0.000	0.000	0.000	0.000	0.000	0.000	0.000	0.000	0.000	0.000	0.000	0.000	120	536	14005	12474	-0.979	Error	Error	4713	9292	0	0	4265	8209	0	0	0	0
1	2	2	""	"YCR044C"	2220	14690	120	7891	7379	3558	66	71	32	100	100	0	7141	6333	2991	227	238	76	98	96	0	0	0	0	0	0	0	0	0	0	0	0	0	0	0	0	0	0	0	1.132	1.198	1.142	1.270	2.404	1.206	0.743	0.000	0.000	0.000	0.000	0.000	0.000	0.000	0.000	0.000	0.000	0.000	0.000	0.000	0.000	120	514	14739	13419	0.179	Error	Error	7825	6914	0	0	7313	6106	0	0	0	0
1	3	2	"rad57"	"YDR004W"	2410	14690	120	5081	4357	1867	71	113	431	90	87	0	14307	12796	4793	236	272	304	97	97	0	0	0	0	0	0	0	0	0	0	0	0	0	0	0	0	0	0	0	0.356	0.341	0.358	0.315	2.153	0.324	0.863	0.000	0.000	0.000	0.000	0.000	0.000	0.000	0.000	0.000	0.000	0.000	0.000	0.000	0.000	120	506	19081	16846	-1.490	Error	Error	5010	14071	0	0	4286	12560	0	0	0	0
1	4	2	""	"YDR034C-C"	2590	14690	130	56804	48516	19205	89	152	293	100	100	5	40900	36823	11126	257	314	266	100	100	0	0	0	0	0	0	0	0	0	0	0	0	0	0	0	0	0	0	0	1.395	1.324	1.368	1.173	1.936	1.401	0.842	0.000	0.000	0.000	0.000	0.000	0.000	0.000	0.000	0.000	0.000	0.000	0.000	0.000	0.000	120	582	97358	84993	0.481	Error	Error	56715	40643	0	0	48427	36566	0	0	0	0
1	5	2	"RPS13"	"YDR064W"	2790	14690	120	5745	4924	2124	89	134	187	97	95	0	7436	6855	2767	253	294	162	99	99	0	0	0	0	0	0	0	0	0	0	0	0	0	0	0	0	0	0	0	0.787	0.732	0.742	0.655	2.044	0.710	0.812	0.000	0.000	0.000	0.000	0.000	0.000	0.000	0.000	0.000	0.000	0.000	0.000	0.000	0.000	120	524	12839	11437	-0.345	Error	Error	5656	7183	0	0	4835	6602	0	0	0	0
1	6	2	"SOK1"	"YDR006C"	2990	14690	120	3108	3028	1378	73	79	31	100	100	0	3204	3218	1568	235	242	79	96	96	0	0	0	0	0	0	0	0	0	0	0	0	0	0	0	0	0	0	0	1.022	0.991	0.904	0.977	2.001	0.920	0.722	0.000	0.000	0.000	0.000	0.000	0.000	0.000	0.000	0.000	0.000	0.000	0.000	0.000	0.000	120	473	6004	5938	0.032	Error	Error	3035	2969	0	0	2955	2983	0	0	0	0
1	7	2	""	"YDR034W-B"	3170	14680	120	1319	1144	635	74	80	54	93	88	0	1343	1206	631	229	237	90	87	81	0	0	0	0	0	0	0	0	0	0	0	0	0	0	0	0	0	0	0	1.118	1.095	1.122	1.041	2.664	1.037	0.683	0.000	0.000	0.000	0.000	0.000	0.000	0.000	0.000	0.000	0.000	0.000	0.000	0.000	0.000	120	521	2359	2047	0.160	Error	Error	1245	1114	0	0	1070	977	0	0	0	0
1	8	2	""	"YDR066C"	3360	14680	110	4360	4306	2035	74	180	660	90	86	0	13504	12357	5308	246	596	2080	97	87	0	0	0	0	0	0	0	0	0	0	0	0	0	0	0	0	0	0	0	0.323	0.349	0.358	0.326	1.730	0.331	0.847	0.000	0.000	0.000	0.000	0.000	0.000	0.000	0.000	0.000	0.000	0.000	0.000	0.000	0.000	80	496	17544	16343	-1.629	Error	Error	4286	13258	0	0	4232	12111	0	0	0	0
1	9	2	""	"YDR008C"	3530	14680	110	2388	2039	891	81	296	819	85	72	0	2046	1789	724	254	702	2113	21	0	0	0	0	0	0	0	0	0	0	0	0	0	0	0	0	0	0	0	0	1.287	1.276	1.227	1.246	1.936	0.437	0.458	0.000	0.000	0.000	0.000	0.000	0.000	0.000	0.000	0.000	0.000	0.000	0.000	0.000	0.000	80	493	4099	3493	0.364	Error	Error	2307	1792	0	0	1958	1535	0	0	0	0
1	10	2	""	"YDR036C"	3720	14680	120	11609	10059	5043	83	183	477	100	95	0	17256	15212	7249	247	341	416	99	99	0	0	0	0	0	0	0	0	0	0	0	0	0	0	0	0	0	0	0	0.678	0.667	0.688	0.651	2.048	0.650	0.792	0.000	0.000	0.000	0.000	0.000	0.000	0.000	0.000	0.000	0.000	0.000	0.000	0.000	0.000	120	562	28535	24941	-0.561	Error	Error	11526	17009	0	0	9976	14965	0	0	0	0
1	11	2	"DOS2"	"YDR068W"	3930	14680	120	9181	7547	4136	80	92	98	98	95	0	16794	14065	7438	250	288	343	96	94	0	0	0	0	0	0	0	0	0	0	0	0	0	0	0	0	0	0	0	0.550	0.540	0.531	0.509	3.095	0.496	0.753	0.000	0.000	0.000	0.000	0.000	0.000	0.000	0.000	0.000	0.000	0.000	0.000	0.000	0.000	120	580	25645	21282	-0.862	Error	Error	9101	16544	0	0	7467	13815	0	0	0	0
1	12	2	""	"YDR010C"	4130	14680	120	3746	3240	1480	84	95	102	95	90	0	2752	2514	1134	252	293	366	89	82	0	0	0	0	0	0	0	0	0	0	0	0	0	0	0	0	0	0	0	1.465	1.395	1.387	1.269	2.464	1.406	0.726	0.000	0.000	0.000	0.000	0.000	0.000	0.000	0.000	0.000	0.000	0.000	0.000	0.000	0.000	120	494	6162	5418	0.551	Error	Error	3662	2500	0	0	3156	2262	0	0	0	0
1	13	2	"ENA5"	"YDR038C"	4320	14680	120	4290	4306	2507	77	80	30	100	98	0	6364	6449	3742	241	251	78	96	95	0	0	0	0	0	0	0	0	0	0	0	0	0	0	0	0	0	0	0	0.688	0.681	0.646	0.675	3.056	0.598	0.635	0.000	0.000	0.000	0.000	0.000	0.000	0.000	0.000	0.000	0.000	0.000	0.000	0.000	0.000	120	507	10336	10437	-0.539	Error	Error	4213	6123	0	0	4229	6208	0	0	0	0
1	14	2	""	"YDR070C"	4510	14680	120	2081	1858	898	76	83	53	90	90	0	2929	2566	1203	242	256	104	89	88	0	0	0	0	0	0	0	0	0	0	0	0	0	0	0	0	0	0	0	0.746	0.767	0.738	0.757	2.765	0.728	0.801	0.000	0.000	0.000	0.000	0.000	0.000	0.000	0.000	0.000	0.000	0.000	0.000	0.000	0.000	120	505	4692	4106	-0.422	Error	Error	2005	2687	0	0	1782	2324	0	0	0	0
1	15	2	""	"YDR366C"	4700	14670	120	19044	16248	9942	83	93	61	99	98	0	22777	19138	11715	255	277	116	100	100	0	0	0	0	0	0	0	0	0	0	0	0	0	0	0	0	0	0	0	0.842	0.856	0.804	0.768	2.565	0.836	0.819	0.000	0.000	0.000	0.000	0.000	0.000	0.000	0.000	0.000	0.000	0.000	0.000	0.000	0.000	120	485	41483	35048	-0.248	Error	Error	18961	22522	0	0	16165	18883	0	0	0	0
1	16	2	""	"YDR398W"	4860	14670	110	4847	4835	2227	88	179	584	100	93	0	5631	5322	2546	261	364	639	93	91	0	0	0	0	0	0	0	0	0	0	0	0	0	0	0	0	0	0	0	0.886	0.938	0.980	1.022	1.991	0.906	0.795	0.000	0.000	0.000	0.000	0.000	0.000	0.000	0.000	0.000	0.000	0.000	0.000	0.000	0.000	80	469	10129	9808	-0.174	Error	Error	4759	5370	0	0	4747	5061	0	0	0	0
1	17	2	""	"YDR430C"	5090	14680	130	4444	4580	2626	83	155	508	96	93	0	3969	3922	2215	257	341	590	90	85	0	0	0	0	0	0	0	0	0	0	0	0	0	0	0	0	0	0	0	1.175	1.227	1.114	1.289	2.067	1.276	0.703	0.000	0.000	0.000	0.000	0.000	0.000	0.000	0.000	0.000	0.000	0.000	0.000	0.000	0.000	120	630	8073	8162	0.232	Error	Error	4361	3712	0	0	4497	3665	0	0	0	0
1	18	2	"YPR1"	"YDR368W"	5270	14670	110	3570	3151	1394	83	204	616	92	85	0	6641	6184	3347	254	502	1250	83	77	0	0	0	0	0	0	0	0	0	0	0	0	0	0	0	0	0	0	0	0.546	0.517	0.544	0.566	2.422	0.452	0.724	0.000	0.000	0.000	0.000	0.000	0.000	0.000	0.000	0.000	0.000	0.000	0.000	0.000	0.000	80	445	9874	8998	-0.873	Error	Error	3487	6387	0	0	3068	5930	0	0	0	0
1	19	2	""	"YDR400W"	5470	14680	120	7146	6733	3101	90	195	584	95	93	0	14639	13247	6535	261	485	1188	92	86	0	0	0	0	0	0	0	0	0	0	0	0	0	0	0	0	0	0	0	0.491	0.512	0.515	0.568	2.583	0.455	0.767	0.000	0.000	0.000	0.000	0.000	0.000	0.000	0.000	0.000	0.000	0.000	0.000	0.000	0.000	120	493	21434	19629	-1.027	Error	Error	7056	14378	0	0	6643	12986	0	0	0	0
1	20	2	"NPL3"	"YDR432W"	5650	14680	120	7894	7527	3730	84	93	55	100	100	0	7330	6392	3309	270	289	158	90	89	0	0	0	0	0	0	0	0	0	0	0	0	0	0	0	0	0	0	0	1.106	1.216	1.134	1.393	2.585	1.169	0.834	0.000	0.000	0.000	0.000	0.000	0.000	0.000	0.000	0.000	0.000	0.000	0.000	0.000	0.000	120	519	14870	13565	0.146	Error	Error	7810	7060	0	0	7443	6122	0	0	0	0
1	21	2	""	"YDR370C"	5860	14680	120	12809	11076	4074	86	104	154	100	100	0	12202	10764	4529	278	288	111	98	97	0	0	0	0	0	0	0	0	0	0	0	0	0	0	0	0	0	0	0	1.067	1.048	1.046	1.191	2.286	1.028	0.862	0.000	0.000	0.000	0.000	0.000	0.000	0.000	0.000	0.000	0.000	0.000	0.000	0.000	0.000	120	545	24647	21476	0.094	Error	Error	12723	11924	0	0	10990	10486	0	0	0	0
1	22	2	"DIT2"	"YDR402C"	6050	14670	110	4882	4864	2274	92	227	727	92	87	0	12315	11318	5414	281	529	1415	96	91	0	0	0	0	0	0	0	0	0	0	0	0	0	0	0	0	0	0	0	0.398	0.432	0.438	0.424	1.741	0.403	0.830	0.000	0.000	0.000	0.000	0.000	0.000	0.000	0.000	0.000	0.000	0.000	0.000	0.000	0.000	80	538	16824	15809	-1.329	Error	Error	4790	12034	0	0	4772	11037	0	0	0	0
1	1	3	""	"YDR434W"	2070	14870	120	4803	5325	3378	62	68	43	98	98	0	9387	9788	5888	227	237	82	100	100	0	0	0	0	0	0	0	0	0	0	0	0	0	0	0	0	0	0	0	0.518	0.550	0.553	0.472	2.680	0.523	0.789	0.000	0.000	0.000	0.000	0.000	0.000	0.000	0.000	0.000	0.000	0.000	0.000	0.000	0.000	120	567	13901	14824	-0.950	Error	Error	4741	9160	0	0	5263	9561	0	0	0	0
1	2	3	""	"YDR372C"	2260	14880	120	5720	5299	2729	70	82	108	100	100	0	9168	8297	5202	243	276	373	95	89	0	0	0	0	0	0	0	0	0	0	0	0	0	0	0	0	0	0	0	0.633	0.649	0.614	0.743	2.376	0.560	0.773	0.000	0.000	0.000	0.000	0.000	0.000	0.000	0.000	0.000	0.000	0.000	0.000	0.000	0.000	120	496	14575	13283	-0.660	Error	Error	5650	8925	0	0	5229	8054	0	0	0	0
1	3	3	"rpb7"	"YDR404C"	2440	14870	120	3964	4064	2778	74	84	71	96	92	0	4876	4701	2760	247	258	106	98	91	0	0	0	0	0	0	0	0	0	0	0	0	0	0	0	0	0	0	0	0.840	0.896	0.835	0.832	2.757	0.919	0.698	0.000	0.000	0.000	0.000	0.000	0.000	0.000	0.000	0.000	0.000	0.000	0.000	0.000	0.000	120	517	8519	8444	-0.251	Error	Error	3890	4629	0	0	3990	4454	0	0	0	0
1	4	3	"PPZ2"	"YDR436W"	2650	14870	120	5627	5076	2978	76	106	178	99	90	0	6293	5523	3201	239	266	197	97	95	0	0	0	0	0	0	0	0	0	0	0	0	0	0	0	0	0	0	0	0.917	0.946	0.916	0.966	2.935	0.930	0.700	0.000	0.000	0.000	0.000	0.000	0.000	0.000	0.000	0.000	0.000	0.000	0.000	0.000	0.000	120	535	11605	10284	-0.125	Error	Error	5551	6054	0	0	5000	5284	0	0	0	0
1	5	3	"LSM4"	"YER112W"	2840	14870	120	5478	4717	2059	73	78	35	100	100	0	8604	7355	3419	233	240	74	99	98	0	0	0	0	0	0	0	0	0	0	0	0	0	0	0	0	0	0	0	0.646	0.652	0.659	0.687	3.041	0.607	0.776	0.000	0.000	0.000	0.000	0.000	0.000	0.000	0.000	0.000	0.000	0.000	0.000	0.000	0.000	120	510	13776	11766	-0.631	Error	Error	5405	8371	0	0	4644	7122	0	0	0	0
1	6	3	"COX15"	"YER141W"	3040	14870	120	8065	7778	4497	72	77	29	100	100	0	10367	9055	4974	233	240	70	98	97	0	0	0	0	0	0	0	0	0	0	0	0	0	0	0	0	0	0	0	0.789	0.873	0.788	0.825	2.639	0.870	0.747	0.000	0.000	0.000	0.000	0.000	0.000	0.000	0.000	0.000	0.000	0.000	0.000	0.000	0.000	120	490	18127	16528	-0.342	Error	Error	7993	10134	0	0	7706	8822	0	0	0	0
1	7	3	"BRR2"	"YER172C"	3220	14870	120	420	391	188	74	81	53	85	81	0	833	791	380	233	246	96	85	82	0	0	0	0	0	0	0	0	0	0	0	0	0	0	0	0	0	0	0	0.577	0.568	0.549	0.497	2.142	0.467	0.614	0.000	0.000	0.000	0.000	0.000	0.000	0.000	0.000	0.000	0.000	0.000	0.000	0.000	0.000	120	529	946	875	-0.794	Error	Error	346	600	0	0	317	558	0	0	0	0
1	8	3	"BOI2"	"YER114C"	3410	14870	110	2964	2784	1409	74	177	598	87	83	0	2784	2649	1423	236	419	1330	80	46	0	0	0	0	0	0	0	0	0	0	0	0	0	0	0	0	0	0	0	1.134	1.123	1.099	1.103	2.371	1.074	0.780	0.000	0.000	0.000	0.000	0.000	0.000	0.000	0.000	0.000	0.000	0.000	0.000	0.000	0.000	80	507	5438	5123	0.182	Error	Error	2890	2548	0	0	2710	2413	0	0	0	0
1	9	3	"DDI1"	"YER143W"	3610	14870	120	6983	6543	3611	77	186	533	87	85	0	17195	15246	8242	238	341	522	97	90	0	0	0	0	0	0	0	0	0	0	0	0	0	0	0	0	0	0	0	0.407	0.431	0.421	0.423	3.071	0.404	0.804	0.000	0.000	0.000	0.000	0.000	0.000	0.000	0.000	0.000	0.000	0.000	0.000	0.000	0.000	120	577	23863	21474	-1.296	Error	Error	6906	16957	0	0	6466	15008	0	0	0	0
1	10	3	"GRX4"	"YER174C"	3790	14870	110	3124	3055	1718	77	92	106	97	90	0	4574	4310	2451	242	274	262	95	86	0	0	0	0	0	0	0	0	0	0	0	0	0	0	0	0	0	0	0	0.703	0.732	0.676	0.735	2.171	0.670	0.801	0.000	0.000	0.000	0.000	0.000	0.000	0.000	0.000	0.000	0.000	0.000	0.000	0.000	0.000	80	501	7379	7046	-0.508	Error	Error	3047	4332	0	0	2978	4068	0	0	0	0
1	11	3	""	"YER116C"	3990	14870	110	6715	5639	2722	84	133	300	92	88	0	4508	3894	1886	255	312	398	88	83	0	0	0	0	0	0	0	0	0	0	0	0	0	0	0	0	0	0	0	1.559	1.527	1.533	1.498	2.021	1.575	0.839	0.000	0.000	0.000	0.000	0.000	0.000	0.000	0.000	0.000	0.000	0.000	0.000	0.000	0.000	80	529	10884	9194	0.641	Error	Error	6631	4253	0	0	5555	3639	0	0	0	0
1	12	3	"FTR1"	"YER145C"	4170	14870	110	5961	5928	3106	86	182	591	91	82	0	5985	5606	2830	265	360	645	92	86	0	0	0	0	0	0	0	0	0	0	0	0	0	0	0	0	0	0	0	1.027	1.094	1.098	1.024	1.815	1.076	0.869	0.000	0.000	0.000	0.000	0.000	0.000	0.000	0.000	0.000	0.000	0.000	0.000	0.000	0.000	80	514	11595	11183	0.039	Error	Error	5875	5720	0	0	5842	5341	0	0	0	0
1	13	3	"ECM32"	"YER176W"	4360	14870	110	2486	2682	2070	75	161	551	85	82	0	2126	2527	1793	238	330	613	83	67	0	0	0	0	0	0	0	0	0	0	0	0	0	0	0	0	0	0	0	1.277	1.139	1.144	1.120	2.185	1.145	0.756	0.000	0.000	0.000	0.000	0.000	0.000	0.000	0.000	0.000	0.000	0.000	0.000	0.000	0.000	80	527	4299	4896	0.353	Error	Error	2411	1888	0	0	2607	2289	0	0	0	0
1	14	3	"SSU81"	"YER118C"	4550	14870	110	12018	10425	4894	77	203	820	92	88	0	23125	21482	9744	251	553	2280	93	91	0	0	0	0	0	0	0	0	0	0	0	0	0	0	0	0	0	0	0	0.522	0.487	0.480	0.446	1.887	0.456	0.884	0.000	0.000	0.000	0.000	0.000	0.000	0.000	0.000	0.000	0.000	0.000	0.000	0.000	0.000	80	536	34815	31579	-0.938	Error	Error	11941	22874	0	0	10348	21231	0	0	0	0
1	15	3	""	"YER147C"	4750	14870	110	6491	5854	2804	90	226	861	90	85	0	6488	5689	2818	271	593	2289	77	72	0	0	0	0	0	0	0	0	0	0	0	0	0	0	0	0	0	0	0	1.030	1.064	1.083	1.126	2.090	1.062	0.811	0.000	0.000	0.000	0.000	0.000	0.000	0.000	0.000	0.000	0.000	0.000	0.000	0.000	0.000	80	538	12618	11182	0.042	Error	Error	6401	6217	0	0	5764	5418	0	0	0	0
1	16	3	"pda1"	"YER178W"	4930	14870	110	5749	5729	4259	91	247	861	83	76	0	10187	9381	5579	273	512	1485	82	78	0	0	0	0	0	0	0	0	0	0	0	0	0	0	0	0	0	0	0	0.571	0.619	0.616	0.620	2.863	0.594	0.720	0.000	0.000	0.000	0.000	0.000	0.000	0.000	0.000	0.000	0.000	0.000	0.000	0.000	0.000	80	557	15572	14746	-0.809	Error	Error	5658	9914	0	0	5638	9108	0	0	0	0
1	17	3	"pmr1"	"YGL167C"	5130	14880	110	343	318	138	79	174	732	1	0	0	682	655	322	257	459	1484	0	0	0	0	0	0	0	0	0	0	0	0	0	0	0	0	0	0	0	0	0	0.621	0.601	0.549	0.506	2.230	0.433	0.505	0.000	0.000	0.000	0.000	0.000	0.000	0.000	0.000	0.000	0.000	0.000	0.000	0.000	0.000	80	538	689	637	-0.687	Error	Error	264	425	0	0	239	398	0	0	0	0
1	18	3	""	"YGL199C"	5320	14870	110	4928	4101	2068	82	140	394	91	86	0	2835	2571	1220	248	325	652	81	81	0	0	0	0	0	0	0	0	0	0	0	0	0	0	0	0	0	0	0	1.873	1.730	1.716	1.932	2.583	1.839	0.842	0.000	0.000	0.000	0.000	0.000	0.000	0.000	0.000	0.000	0.000	0.000	0.000	0.000	0.000	80	542	7433	6342	0.906	Error	Error	4846	2587	0	0	4019	2323	0	0	0	0
1	19	3	""	"YGL230C"	5500	14870	110	3535	2946	1511	85	153	397	88	81	0	6809	5927	2906	261	364	705	87	85	0	0	0	0	0	0	0	0	0	0	0	0	0	0	0	0	0	0	0	0.527	0.505	0.537	0.544	2.640	0.481	0.826	0.000	0.000	0.000	0.000	0.000	0.000	0.000	0.000	0.000	0.000	0.000	0.000	0.000	0.000	80	521	9998	8527	-0.924	Error	Error	3450	6548	0	0	2861	5666	0	0	0	0
1	20	3	"SUA5"	"YGL169W"	5700	14870	110	5669	4888	2550	86	170	499	88	85	0	11221	9781	5314	275	455	1085	83	82	0	0	0	0	0	0	0	0	0	0	0	0	0	0	0	0	0	0	0	0.510	0.505	0.547	0.612	3.356	0.465	0.786	0.000	0.000	0.000	0.000	0.000	0.000	0.000	0.000	0.000	0.000	0.000	0.000	0.000	0.000	80	527	16529	14308	-0.971	Error	Error	5583	10946	0	0	4802	9506	0	0	0	0
1	21	3	"MCM6"	"YGL201C"	5880	14870	110	1329	1360	922	86	161	465	81	68	0	2217	2186	1562	273	410	906	75	53	0	0	0	0	0	0	0	0	0	0	0	0	0	0	0	0	0	0	0	0.639	0.666	0.615	0.675	2.265	0.521	0.692	0.000	0.000	0.000	0.000	0.000	0.000	0.000	0.000	0.000	0.000	0.000	0.000	0.000	0.000	80	521	3187	3187	-0.645	Error	Error	1243	1944	0	0	1274	1913	0	0	0	0
1	22	3	""	"YGL232W"	6080	14870	110	5099	4341	2299	93	154	450	93	83	0	11198	9423	4873	283	363	729	90	88	0	0	0	0	0	0	0	0	0	0	0	0	0	0	0	0	0	0	0	0.459	0.465	0.480	0.481	2.885	0.440	0.794	0.000	0.000	0.000	0.000	0.000	0.000	0.000	0.000	0.000	0.000	0.000	0.000	0.000	0.000	80	584	15921	13388	-1.125	Error	Error	5006	10915	0	0	4248	9140	0	0	0	0
1	1	4	"ROK1"	"YGL171W"	2090	15070	120	7910	7086	2960	64	98	293	99	96	0	10952	10050	4195	225	313	694	98	96	0	0	0	0	0	0	0	0	0	0	0	0	0	0	0	0	0	0	0	0.731	0.715	0.698	0.710	1.974	0.685	0.803	0.000	0.000	0.000	0.000	0.000	0.000	0.000	0.000	0.000	0.000	0.000	0.000	0.000	0.000	120	620	18573	16847	-0.451	Error	Error	7846	10727	0	0	7022	9825	0	0	0	0
1	2	4	"kex1"	"YGL203C"	2270	15070	110	7694	8331	3946	76	246	965	100	96	0	6022	5868	2270	253	463	1096	98	91	0	0	0	0	0	0	0	0	0	0	0	0	0	0	0	0	0	0	0	1.321	1.470	1.412	1.432	1.537	1.495	0.734	0.000	0.000	0.000	0.000	0.000	0.000	0.000	0.000	0.000	0.000	0.000	0.000	0.000	0.000	80	489	13387	13870	0.401	Error	Error	7618	5769	0	0	8255	5615	0	0	0	0
1	3	4	"ade5,7"	"YGL234W"	2470	15070	110	8728	8785	2673	77	248	966	100	100	0	6158	6180	1627	247	405	878	100	100	0	0	0	0	0	0	0	0	0	0	0	0	0	0	0	0	0	0	0	1.464	1.468	1.497	1.449	1.298	1.487	0.858	0.000	0.000	0.000	0.000	0.000	0.000	0.000	0.000	0.000	0.000	0.000	0.000	0.000	0.000	80	524	14562	14641	0.549	Error	Error	8651	5911	0	0	8708	5933	0	0	0	0
1	4	4	"KEM1"	"YGL173C"	2650	15070	110	1774	1928	1448	76	172	477	92	73	0	2170	2288	1359	240	352	560	92	80	0	0	0	0	0	0	0	0	0	0	0	0	0	0	0	0	0	0	0	0.880	0.904	0.888	0.890	2.013	0.890	0.645	0.000	0.000	0.000	0.000	0.000	0.000	0.000	0.000	0.000	0.000	0.000	0.000	0.000	0.000	80	522	3628	3900	-0.185	Error	Error	1698	1930	0	0	1852	2048	0	0	0	0
1	5	4	"POX1"	"YGL205W"	2850	15060	110	7473	6871	3211	76	234	929	91	83	0	8190	7158	3418	243	429	1119	91	80	0	0	0	0	0	0	0	0	0	0	0	0	0	0	0	0	0	0	0	0.931	0.983	0.975	0.998	1.894	0.974	0.804	0.000	0.000	0.000	0.000	0.000	0.000	0.000	0.000	0.000	0.000	0.000	0.000	0.000	0.000	80	550	15344	13710	-0.103	Error	Error	7397	7947	0	0	6795	6915	0	0	0	0
1	6	4	""	"YGL236C"	3050	15060	110	8163	7917	2781	80	219	905	100	98	0	8753	8287	3060	251	403	1111	100	97	0	0	0	0	0	0	0	0	0	0	0	0	0	0	0	0	0	0	0	0.951	0.975	0.954	0.994	1.669	0.943	0.839	0.000	0.000	0.000	0.000	0.000	0.000	0.000	0.000	0.000	0.000	0.000	0.000	0.000	0.000	80	529	16585	15873	-0.073	Error	Error	8083	8502	0	0	7837	8036	0	0	0	0
1	7	4	"RNH70"	"YGR276C"	3240	15060	110	7135	6683	1800	83	208	753	100	100	0	5488	5278	1453	253	364	705	100	100	0	0	0	0	0	0	0	0	0	0	0	0	0	0	0	0	0	0	0	1.347	1.313	1.303	1.318	1.299	1.294	0.864	0.000	0.000	0.000	0.000	0.000	0.000	0.000	0.000	0.000	0.000	0.000	0.000	0.000	0.000	80	503	12287	11625	0.430	Error	Error	7052	5235	0	0	6600	5025	0	0	0	0
1	8	4	""	"YHL010C"	3430	15070	120	10211	9113	3542	79	184	706	99	95	0	7235	6320	2773	245	336	652	94	86	0	0	0	0	0	0	0	0	0	0	0	0	0	0	0	0	0	0	0	1.449	1.487	1.434	1.620	2.295	1.489	0.804	0.000	0.000	0.000	0.000	0.000	0.000	0.000	0.000	0.000	0.000	0.000	0.000	0.000	0.000	120	577	17122	15109	0.536	Error	Error	10132	6990	0	0	9034	6075	0	0	0	0
1	9	4	""	"YHL042W"	3610	15070	110	5326	5152	2954	76	182	752	85	82	0	5850	5344	3214	240	386	940	82	73	0	0	0	0	0	0	0	0	0	0	0	0	0	0	0	0	0	0	0	0.936	0.995	0.873	1.031	2.161	0.942	0.784	0.000	0.000	0.000	0.000	0.000	0.000	0.000	0.000	0.000	0.000	0.000	0.000	0.000	0.000	80	500	10860	10180	-0.096	Error	Error	5250	5610	0	0	5076	5104	0	0	0	0
1	10	4	""	"YGR278W"	3820	15070	120	7049	6368	2813	78	172	689	95	88	0	9011	8087	3866	241	371	863	92	88	0	0	0	0	0	0	0	0	0	0	0	0	0	0	0	0	0	0	0	0.795	0.802	0.789	0.807	2.270	0.757	0.797	0.000	0.000	0.000	0.000	0.000	0.000	0.000	0.000	0.000	0.000	0.000	0.000	0.000	0.000	120	599	15741	14136	-0.331	Error	Error	6971	8770	0	0	6290	7846	0	0	0	0
1	11	4	""	"YHL012W"	3990	15070	110	10871	9331	3872	87	385	1617	91	82	0	15792	14765	4696	253	799	2917	98	93	0	0	0	0	0	0	0	0	0	0	0	0	0	0	0	0	0	0	0	0.694	0.637	0.660	0.571	1.659	0.622	0.843	0.000	0.000	0.000	0.000	0.000	0.000	0.000	0.000	0.000	0.000	0.000	0.000	0.000	0.000	80	492	26323	23756	-0.527	Error	Error	10784	15539	0	0	9244	14512	0	0	0	0
1	12	4	""	"YHL044W"	4180	15070	110	7029	6071	3527	89	485	1782	76	75	0	8869	7337	4309	271	942	3040	72	66	0	0	0	0	0	0	0	0	0	0	0	0	0	0	0	0	0	0	0	0.807	0.847	0.762	0.797	2.791	0.724	0.705	0.000	0.000	0.000	0.000	0.000	0.000	0.000	0.000	0.000	0.000	0.000	0.000	0.000	0.000	80	548	15538	13048	-0.309	Error	Error	6940	8598	0	0	5982	7066	0	0	0	0
1	13	4	""	"YGR280C"	4380	15070	110	4994	4362	2115	78	243	978	83	81	0	4999	4567	2085	246	488	1392	85	77	0	0	0	0	0	0	0	0	0	0	0	0	0	0	0	0	0	0	0	1.034	0.991	0.979	0.929	2.104	1.003	0.836	0.000	0.000	0.000	0.000	0.000	0.000	0.000	0.000	0.000	0.000	0.000	0.000	0.000	0.000	80	537	9669	8605	0.049	Error	Error	4916	4753	0	0	4284	4321	0	0	0	0
1	14	4	"YLF2"	"YHL014C"	4560	15070	110	7849	6704	3005	79	249	979	91	83	0	19945	17499	6746	254	673	2589	97	91	0	0	0	0	0	0	0	0	0	0	0	0	0	0	0	0	0	0	0	0.395	0.384	0.399	0.343	1.792	0.376	0.834	0.000	0.000	0.000	0.000	0.000	0.000	0.000	0.000	0.000	0.000	0.000	0.000	0.000	0.000	80	526	27461	23870	-1.342	Error	Error	7770	19691	0	0	6625	17245	0	0	0	0
1	15	4	""	"YHL046C"	4750	15070	110	31910	27211	14171	95	487	2324	88	85	0	36263	28580	16204	271	1117	4443	85	75	0	0	0	0	0	0	0	0	0	0	0	0	0	0	0	0	0	0	0	0.884	0.958	0.869	0.929	2.373	0.895	0.829	0.000	0.000	0.000	0.000	0.000	0.000	0.000	0.000	0.000	0.000	0.000	0.000	0.000	0.000	80	538	67807	55425	-0.178	Error	Error	31815	35992	0	0	27116	28309	0	0	0	0
1	16	4	"BGL2"	"YGR282C"	4940	15070	110	5381	4613	1987	94	426	2206	82	72	0	9371	8119	3308	269	857	3793	82	67	0	0	0	0	0	0	0	0	0	0	0	0	0	0	0	0	0	0	0	0.581	0.576	0.575	0.533	1.846	0.554	0.876	0.000	0.000	0.000	0.000	0.000	0.000	0.000	0.000	0.000	0.000	0.000	0.000	0.000	0.000	80	538	14389	12369	-0.784	Error	Error	5287	9102	0	0	4519	7850	0	0	0	0
1	17	4	"dur3"	"YHL016C"	5130	15070	110	9204	8465	3545	82	275	1029	93	90	0	12925	11949	4665	265	625	1766	96	92	0	0	0	0	0	0	0	0	0	0	0	0	0	0	0	0	0	0	0	0.721	0.717	0.735	0.685	1.723	0.696	0.879	0.000	0.000	0.000	0.000	0.000	0.000	0.000	0.000	0.000	0.000	0.000	0.000	0.000	0.000	80	538	21782	20067	-0.473	Error	Error	9122	12660	0	0	8383	11684	0	0	0	0
1	18	4	"COS8"	"YHL048W"	5330	15070	110	20508	17717	9240	85	335	1359	87	87	0	25624	21917	10990	257	695	2315	88	85	0	0	0	0	0	0	0	0	0	0	0	0	0	0	0	0	0	0	0	0.805	0.814	0.829	0.789	2.385	0.831	0.857	0.000	0.000	0.000	0.000	0.000	0.000	0.000	0.000	0.000	0.000	0.000	0.000	0.000	0.000	80	540	45790	39292	-0.313	Error	Error	20423	25367	0	0	17632	21660	0	0	0	0
1	19	4	"THS1"	"YIL078W"	5510	15070	110	7556	6992	3451	88	305	1222	87	85	0	11842	10482	5279	264	639	2134	85	81	0	0	0	0	0	0	0	0	0	0	0	0	0	0	0	0	0	0	0	0.645	0.676	0.713	0.714	2.202	0.609	0.831	0.000	0.000	0.000	0.000	0.000	0.000	0.000	0.000	0.000	0.000	0.000	0.000	0.000	0.000	80	536	19046	17122	-0.633	Error	Error	7468	11578	0	0	6904	10218	0	0	0	0
1	20	4	""	"YIL110W"	5710	15070	110	8624	7170	3111	97	250	818	91	87	0	24253	21005	8875	278	668	2183	93	88	0	0	0	0	0	0	0	0	0	0	0	0	0	0	0	0	0	0	0	0.356	0.341	0.346	0.336	1.900	0.320	0.856	0.000	0.000	0.000	0.000	0.000	0.000	0.000	0.000	0.000	0.000	0.000	0.000	0.000	0.000	80	552	32502	27800	-1.491	Error	Error	8527	23975	0	0	7073	20727	0	0	0	0
1	21	4	"CCT2"	"YIL142W"	5900	15070	110	6496	5770	2539	92	183	544	91	90	0	5749	5233	2307	275	537	1902	82	77	0	0	0	0	0	0	0	0	0	0	0	0	0	0	0	0	0	0	0	1.170	1.145	1.185	1.186	2.383	1.143	0.866	0.000	0.000	0.000	0.000	0.000	0.000	0.000	0.000	0.000	0.000	0.000	0.000	0.000	0.000	80	541	11878	10636	0.226	Error	Error	6404	5474	0	0	5678	4958	0	0	0	0
1	22	4	""	"YIL080W"	6090	15070	110	15279	12756	6135	98	224	827	95	90	0	23113	20131	9900	286	502	1493	90	83	0	0	0	0	0	0	0	0	0	0	0	0	0	0	0	0	0	0	0	0.665	0.638	0.680	0.693	2.320	0.618	0.831	0.000	0.000	0.000	0.000	0.000	0.000	0.000	0.000	0.000	0.000	0.000	0.000	0.000	0.000	80	552	38008	32503	-0.588	Error	Error	15181	22827	0	0	12658	19845	0	0	0	0
1	1	5	""	"YIL112W"	2100	15260	110	6474	6142	3154	67	105	319	100	97	0	7643	7833	3757	223	307	719	100	95	0	0	0	0	0	0	0	0	0	0	0	0	0	0	0	0	0	0	0	0.863	0.798	0.810	0.764	1.756	0.829	0.785	0.000	0.000	0.000	0.000	0.000	0.000	0.000	0.000	0.000	0.000	0.000	0.000	0.000	0.000	80	547	13827	13685	-0.212	Error	Error	6407	7420	0	0	6075	7610	0	0	0	0
1	2	5	"TID3"	"YIL144W"	2290	15260	110	7302	6718	5250	75	177	608	85	73	0	9242	7963	5883	239	376	883	90	75	0	0	0	0	0	0	0	0	0	0	0	0	0	0	0	0	0	0	0	0.803	0.860	0.812	0.770	3.211	0.835	0.680	0.000	0.000	0.000	0.000	0.000	0.000	0.000	0.000	0.000	0.000	0.000	0.000	0.000	0.000	80	513	16230	14367	-0.317	Error	Error	7227	9003	0	0	6643	7724	0	0	0	0
1	3	5	""	"YIL082W-A"	2480	15260	110	1985	1745	825	76	169	539	86	75	0	3541	3210	1476	239	387	886	83	80	0	0	0	0	0	0	0	0	0	0	0	0	0	0	0	0	0	0	0	0.578	0.562	0.566	0.607	2.512	0.528	0.818	0.000	0.000	0.000	0.000	0.000	0.000	0.000	0.000	0.000	0.000	0.000	0.000	0.000	0.000	80	509	5211	4640	-0.791	Error	Error	1909	3302	0	0	1669	2971	0	0	0	0
1	4	5	"POR2"	"YIL114C"	2670	15260	110	5152	4392	1993	75	160	458	91	86	0	3898	3588	1527	238	353	602	92	83	0	0	0	0	0	0	0	0	0	0	0	0	0	0	0	0	0	0	0	1.387	1.289	1.314	1.257	1.902	1.331	0.846	0.000	0.000	0.000	0.000	0.000	0.000	0.000	0.000	0.000	0.000	0.000	0.000	0.000	0.000	80	484	8737	7667	0.472	Error	Error	5077	3660	0	0	4317	3350	0	0	0	0
1	5	5	"ECM37"	"YIL146C"	2860	15270	110	581	590	315	74	150	507	50	6	0	838	865	508	237	316	459	63	27	0	0	0	0	0	0	0	0	0	0	0	0	0	0	0	0	0	0	0	0.844	0.822	0.850	0.764	2.697	0.787	0.513	0.000	0.000	0.000	0.000	0.000	0.000	0.000	0.000	0.000	0.000	0.000	0.000	0.000	0.000	80	538	1108	1144	-0.245	Error	Error	507	601	0	0	516	628	0	0	0	0
1	6	5	"SDS3"	"YIL084C"	3060	15270	120	9076	8061	3944	80	143	547	95	90	0	7721	7112	3398	253	426	1573	88	80	0	0	0	0	0	0	0	0	0	0	0	0	0	0	0	0	0	0	0	1.205	1.164	1.154	1.090	2.159	1.154	0.842	0.000	0.000	0.000	0.000	0.000	0.000	0.000	0.000	0.000	0.000	0.000	0.000	0.000	0.000	120	565	16464	14840	0.269	Error	Error	8996	7468	0	0	7981	6859	0	0	0	0
1	7	5	"his5"	"YIL116W"	3240	15270	120	8275	7482	2467	85	122	431	99	98	0	10353	9456	3665	263	287	275	98	96	0	0	0	0	0	0	0	0	0	0	0	0	0	0	0	0	0	0	0	0.812	0.805	0.789	0.858	2.012	0.755	0.851	0.000	0.000	0.000	0.000	0.000	0.000	0.000	0.000	0.000	0.000	0.000	0.000	0.000	0.000	120	488	18280	16590	-0.301	Error	Error	8190	10090	0	0	7397	9193	0	0	0	0
1	8	5	"RPL40A"	"YIL148W"	3420	15270	120	7845	6783	3323	80	128	464	94	91	0	10280	8954	4640	259	363	832	90	83	0	0	0	0	0	0	0	0	0	0	0	0	0	0	0	0	0	0	0	0.775	0.771	0.768	0.843	2.492	0.718	0.830	0.000	0.000	0.000	0.000	0.000	0.000	0.000	0.000	0.000	0.000	0.000	0.000	0.000	0.000	120	525	17786	15398	-0.368	Error	Error	7765	10021	0	0	6703	8695	0	0	0	0
1	9	5	"ilv3"	"YJR016C"	3610	15260	110	4319	3956	1486	80	136	384	98	97	0	8442	7951	3248	256	382	993	97	90	0	0	0	0	0	0	0	0	0	0	0	0	0	0	0	0	0	0	0	0.518	0.504	0.505	0.519	1.560	0.464	0.858	0.000	0.000	0.000	0.000	0.000	0.000	0.000	0.000	0.000	0.000	0.000	0.000	0.000	0.000	80	503	12425	11571	-0.949	Error	Error	4239	8186	0	0	3876	7695	0	0	0	0
1	10	5	"cyc1"	"YJR048W"	3790	15260	110	2378	2072	925	82	139	315	91	82	0	3565	3206	1333	250	379	712	85	81	0	0	0	0	0	0	0	0	0	0	0	0	0	0	0	0	0	0	0	0.693	0.673	0.669	0.671	1.774	0.650	0.835	0.000	0.000	0.000	0.000	0.000	0.000	0.000	0.000	0.000	0.000	0.000	0.000	0.000	0.000	80	511	5611	4946	-0.530	Error	Error	2296	3315	0	0	1990	2956	0	0	0	0
1	11	5	""	"YJR080C"	3990	15260	110	5430	5000	2524	83	219	811	93	87	0	10159	9238	4590	252	459	1256	93	82	0	0	0	0	0	0	0	0	0	0	0	0	0	0	0	0	0	0	0	0.540	0.547	0.586	0.552	2.125	0.532	0.778	0.000	0.000	0.000	0.000	0.000	0.000	0.000	0.000	0.000	0.000	0.000	0.000	0.000	0.000	80	510	15254	13903	-0.890	Error	Error	5347	9907	0	0	4917	8986	0	0	0	0
1	12	5	""	"YJR018W"	4170	15260	110	2373	2139	990	87	208	705	82	76	0	2974	2581	1198	254	441	1083	80	68	0	0	0	0	0	0	0	0	0	0	0	0	0	0	0	0	0	0	0	0.840	0.882	0.871	0.937	2.156	0.791	0.775	0.000	0.000	0.000	0.000	0.000	0.000	0.000	0.000	0.000	0.000	0.000	0.000	0.000	0.000	80	499	5006	4379	-0.251	Error	Error	2286	2720	0	0	2052	2327	0	0	0	0
1	13	5	"ISY1"	"YJR050W"	4360	15260	110	4671	4052	1982	86	150	352	91	85	0	4148	3701	1794	259	336	417	91	81	0	0	0	0	0	0	0	0	0	0	0	0	0	0	0	0	0	0	0	1.179	1.152	1.125	1.116	2.220	1.154	0.839	0.000	0.000	0.000	0.000	0.000	0.000	0.000	0.000	0.000	0.000	0.000	0.000	0.000	0.000	80	511	8474	7408	0.238	Error	Error	4585	3889	0	0	3966	3442	0	0	0	0
1	14	5	""	"YJR083C"	4550	15260	110	7089	6426	3637	83	204	760	86	81	0	7219	6424	3619	258	405	1022	83	80	0	0	0	0	0	0	0	0	0	0	0	0	0	0	0	0	0	0	0	1.006	1.029	1.052	1.025	2.165	1.003	0.827	0.000	0.000	0.000	0.000	0.000	0.000	0.000	0.000	0.000	0.000	0.000	0.000	0.000	0.000	80	516	13967	12509	0.009	Error	Error	7006	6961	0	0	6343	6166	0	0	0	0
1	15	5	""	"YJR020W"	4730	15260	110	3702	3052	1372	86	248	794	83	78	0	3743	3245	1488	265	475	978	81	76	0	0	0	0	0	0	0	0	0	0	0	0	0	0	0	0	0	0	0	1.040	0.995	0.987	0.918	2.512	0.919	0.800	0.000	0.000	0.000	0.000	0.000	0.000	0.000	0.000	0.000	0.000	0.000	0.000	0.000	0.000	80	498	7094	5946	0.056	Error	Error	3616	3478	0	0	2966	2980	0	0	0	0
1	16	5	"rad7"	"YJR052W"	4920	15260	110	5518	5160	2212	86	244	742	95	88	0	6949	6280	2705	266	472	980	93	87	0	0	0	0	0	0	0	0	0	0	0	0	0	0	0	0	0	0	0	0.813	0.844	0.840	0.853	1.834	0.827	0.845	0.000	0.000	0.000	0.000	0.000	0.000	0.000	0.000	0.000	0.000	0.000	0.000	0.000	0.000	80	528	12115	11088	-0.299	Error	Error	5432	6683	0	0	5074	6014	0	0	0	0
1	17	5	""	"YJR085C"	5110	15260	110	3461	2903	1343	81	213	684	86	81	0	3979	3447	1650	256	436	945	82	76	0	0	0	0	0	0	0	0	0	0	0	0	0	0	0	0	0	0	0	0.908	0.884	0.861	0.907	2.343	0.851	0.852	0.000	0.000	0.000	0.000	0.000	0.000	0.000	0.000	0.000	0.000	0.000	0.000	0.000	0.000	80	498	7103	6013	-0.139	Error	Error	3380	3723	0	0	2822	3191	0	0	0	0
1	18	5	"LSM8"	"YJR022W"	5290	15260	110	2750	2297	1037	90	250	624	82	81	0	2822	2440	1050	272	453	730	82	76	0	0	0	0	0	0	0	0	0	0	0	0	0	0	0	0	0	0	0	1.043	1.018	1.014	0.935	2.061	0.942	0.835	0.000	0.000	0.000	0.000	0.000	0.000	0.000	0.000	0.000	0.000	0.000	0.000	0.000	0.000	80	530	5210	4375	0.061	Error	Error	2660	2550	0	0	2207	2168	0	0	0	0
1	19	5	""	"YJR054W"	5490	15260	110	10030	8475	3785	93	270	782	95	92	0	14850	12999	5756	273	542	1398	95	86	0	0	0	0	0	0	0	0	0	0	0	0	0	0	0	0	0	0	0	0.682	0.659	0.689	0.656	1.806	0.639	0.856	0.000	0.000	0.000	0.000	0.000	0.000	0.000	0.000	0.000	0.000	0.000	0.000	0.000	0.000	80	536	24514	21108	-0.553	Error	Error	9937	14577	0	0	8382	12726	0	0	0	0
1	20	5	""	"YJR087W"	5670	15260	110	3522	2924	1334	97	252	784	82	77	0	3750	3199	1526	279	535	1415	80	66	0	0	0	0	0	0	0	0	0	0	0	0	0	0	0	0	0	0	0	0.987	0.968	0.968	0.994	1.845	0.787	0.753	0.000	0.000	0.000	0.000	0.000	0.000	0.000	0.000	0.000	0.000	0.000	0.000	0.000	0.000	80	530	6896	5747	-0.019	Error	Error	3425	3471	0	0	2827	2920	0	0	0	0
1	21	5	"RSC4"	"YKR008W"	5870	15260	110	8389	7099	3190	92	198	553	100	95	0	12732	12163	5203	282	454	869	97	96	0	0	0	0	0	0	0	0	0	0	0	0	0	0	0	0	0	0	0	0.666	0.590	0.609	0.580	1.739	0.575	0.879	0.000	0.000	0.000	0.000	0.000	0.000	0.000	0.000	0.000	0.000	0.000	0.000	0.000	0.000	80	528	20747	18888	-0.585	Error	Error	8297	12450	0	0	7007	11881	0	0	0	0
1	22	5	"gap1"	"YKR039W"	6050	15260	110	7748	7114	2610	93	312	1084	98	93	0	8422	7789	2607	285	590	1414	96	91	0	0	0	0	0	0	0	0	0	0	0	0	0	0	0	0	0	0	0	0.941	0.936	0.962	0.929	1.441	0.925	0.880	0.000	0.000	0.000	0.000	0.000	0.000	0.000	0.000	0.000	0.000	0.000	0.000	0.000	0.000	80	549	15792	14525	-0.088	Error	Error	7655	8137	0	0	7021	7504	0	0	0	0
1	1	6	""	"YKR071C"	2060	15450	110	7834	7260	3684	67	330	1441	87	81	0	12982	12177	6036	235	745	2738	87	78	0	0	0	0	0	0	0	0	0	0	0	0	0	0	0	0	0	0	0	0.609	0.602	0.556	0.553	2.113	0.550	0.801	0.000	0.000	0.000	0.000	0.000	0.000	0.000	0.000	0.000	0.000	0.000	0.000	0.000	0.000	80	536	20514	19135	-0.715	Error	Error	7767	12747	0	0	7193	11942	0	0	0	0
1	2	6	"TOF2"	"YKR010C"	2260	15450	120	7400	7061	3389	80	342	1410	92	85	0	10050	9171	4170	240	730	2640	85	81	0	0	0	0	0	0	0	0	0	0	0	0	0	0	0	0	0	0	0	0.746	0.782	0.786	0.806	2.485	0.733	0.815	0.000	0.000	0.000	0.000	0.000	0.000	0.000	0.000	0.000	0.000	0.000	0.000	0.000	0.000	120	579	17130	15912	-0.422	Error	Error	7320	9810	0	0	6981	8931	0	0	0	0
1	3	6	""	"YKR041W"	2450	15450	120	3322	2913	1166	82	108	238	96	93	0	2719	2559	1003	246	278	289	94	89	0	0	0	0	0	0	0	0	0	0	0	0	0	0	0	0	0	0	0	1.310	1.224	1.215	1.165	1.964	1.249	0.794	0.000	0.000	0.000	0.000	0.000	0.000	0.000	0.000	0.000	0.000	0.000	0.000	0.000	0.000	120	527	5713	5144	0.390	Error	Error	3240	2473	0	0	2831	2313	0	0	0	0
1	4	6	""	"YKR073C"	2640	15440	150	163	200	147	80	166	540	3	0	0	328	413	276	251	378	740	6	0	0	0	0	0	0	0	0	0	0	0	0	0	0	0	0	0	0	0	0	1.078	0.741	0.605	0.633	2.913	0.546	0.413	0.000	0.000	0.000	0.000	0.000	0.000	0.000	0.000	0.000	0.000	0.000	0.000	0.000	0.000	156	689	160	282	0.108	Error	Error	83	77	0	0	120	162	0	0	-50	0
1	5	6	""	"YKR012C"	2810	15450	110	3809	3244	1480	75	169	524	88	83	0	3583	3073	1427	244	349	554	86	82	0	0	0	0	0	0	0	0	0	0	0	0	0	0	0	0	0	0	0	1.118	1.120	1.097	1.066	2.196	1.100	0.812	0.000	0.000	0.000	0.000	0.000	0.000	0.000	0.000	0.000	0.000	0.000	0.000	0.000	0.000	80	461	7073	5998	0.161	Error	Error	3734	3339	0	0	3169	2829	0	0	0	0
1	6	6	""	"YKR043C"	3000	15450	110	9431	8382	3965	81	355	1275	87	85	0	20681	17506	8173	262	859	2994	95	80	0	0	0	0	0	0	0	0	0	0	0	0	0	0	0	0	0	0	0	0.458	0.481	0.462	0.448	1.897	0.439	0.825	0.000	0.000	0.000	0.000	0.000	0.000	0.000	0.000	0.000	0.000	0.000	0.000	0.000	0.000	80	472	29769	25545	-1.127	Error	Error	9350	20419	0	0	8301	17244	0	0	0	0
1	7	6	""	"YKR075C"	3210	15450	120	5481	4835	2276	81	257	1130	85	80	0	9614	8660	3820	271	755	2856	85	76	0	0	0	0	0	0	0	0	0	0	0	0	0	0	0	0	0	0	0	0.578	0.567	0.553	0.533	2.211	0.557	0.872	0.000	0.000	0.000	0.000	0.000	0.000	0.000	0.000	0.000	0.000	0.000	0.000	0.000	0.000	120	523	14743	13143	-0.791	Error	Error	5400	9343	0	0	4754	8389	0	0	0	0
1	8	6	"YPT52"	"YKR014C"	3380	15450	110	6743	5831	2727	80	269	990	86	83	0	7036	6248	2754	272	535	1302	90	81	0	0	0	0	0	0	0	0	0	0	0	0	0	0	0	0	0	0	0	0.985	0.962	0.920	0.884	1.997	0.929	0.821	0.000	0.000	0.000	0.000	0.000	0.000	0.000	0.000	0.000	0.000	0.000	0.000	0.000	0.000	80	453	13427	11727	-0.022	Error	Error	6663	6764	0	0	5751	5976	0	0	0	0
1	9	6	""	"YKR045C"	3570	15450	110	7174	6158	2845	90	421	1340	83	80	0	13414	11656	5189	276	891	2531	88	80	0	0	0	0	0	0	0	0	0	0	0	0	0	0	0	0	0	0	0	0.539	0.533	0.508	0.489	1.850	0.503	0.839	0.000	0.000	0.000	0.000	0.000	0.000	0.000	0.000	0.000	0.000	0.000	0.000	0.000	0.000	80	543	20222	17448	-0.891	Error	Error	7084	13138	0	0	6068	11380	0	0	0	0
1	10	6	""	"YKR077W"	3770	15450	110	9700	9422	5488	88	493	1780	85	78	0	9525	8968	4916	261	936	2758	78	71	0	0	0	0	0	0	0	0	0	0	0	0	0	0	0	0	0	0	0	1.038	1.072	0.983	1.028	2.113	1.054	0.773	0.000	0.000	0.000	0.000	0.000	0.000	0.000	0.000	0.000	0.000	0.000	0.000	0.000	0.000	80	536	18876	18041	0.053	Error	Error	9612	9264	0	0	9334	8707	0	0	0	0
1	11	6	"FRE1"	"YLR214W"	3970	15450	120	8488	7405	3286	85	349	1517	90	84	0	13288	12311	5086	258	564	1697	94	90	0	0	0	0	0	0	0	0	0	0	0	0	0	0	0	0	0	0	0	0.645	0.607	0.587	0.582	2.300	0.588	0.826	0.000	0.000	0.000	0.000	0.000	0.000	0.000	0.000	0.000	0.000	0.000	0.000	0.000	0.000	120	574	21433	19373	-0.633	Error	Error	8403	13030	0	0	7320	12053	0	0	0	0
1	12	6	"MAP1"	"YLR244C"	4160	15450	120	6179	5370	2596	91	118	210	95	86	0	13002	11088	5253	263	299	223	96	95	0	0	0	0	0	0	0	0	0	0	0	0	0	0	0	0	0	0	0	0.478	0.488	0.478	0.456	2.606	0.463	0.855	0.000	0.000	0.000	0.000	0.000	0.000	0.000	0.000	0.000	0.000	0.000	0.000	0.000	0.000	120	537	18827	16104	-1.065	Error	Error	6088	12739	0	0	5279	10825	0	0	0	0
1	13	6	"CDC46"	"YLR274W"	4350	15450	120	5303	5563	3915	93	115	225	95	92	0	8098	7530	4564	266	295	223	97	94	0	0	0	0	0	0	0	0	0	0	0	0	0	0	0	0	0	0	0	0.665	0.753	0.702	0.751	2.537	0.778	0.813	0.000	0.000	0.000	0.000	0.000	0.000	0.000	0.000	0.000	0.000	0.000	0.000	0.000	0.000	120	549	13042	12734	-0.588	Error	Error	5210	7832	0	0	5470	7264	0	0	0	0
1	14	6	"CPR6"	"YLR216C"	4530	15450	110	8634	7546	3164	89	309	1228	92	88	0	7602	7130	2540	270	510	1311	100	92	0	0	0	0	0	0	0	0	0	0	0	0	0	0	0	0	0	0	0	1.165	1.087	1.109	1.005	1.533	1.103	0.874	0.000	0.000	0.000	0.000	0.000	0.000	0.000	0.000	0.000	0.000	0.000	0.000	0.000	0.000	80	494	15877	14317	0.221	Error	Error	8545	7332	0	0	7457	6860	0	0	0	0
1	15	6	"ERF2"	"YLR246W"	4730	15450	120	3118	2901	1400	92	293	1135	82	72	0	4922	4626	2139	275	492	1225	86	78	0	0	0	0	0	0	0	0	0	0	0	0	0	0	0	0	0	0	0	0.651	0.646	0.628	0.618	2.126	0.628	0.810	0.000	0.000	0.000	0.000	0.000	0.000	0.000	0.000	0.000	0.000	0.000	0.000	0.000	0.000	120	598	7673	7160	-0.619	Error	Error	3026	4647	0	0	2809	4351	0	0	0	0
1	16	6	"DBP9"	"YLR276C"	4920	15450	110	8235	7810	4133	85	281	1229	86	82	0	23510	21074	11152	264	849	3630	86	77	0	0	0	0	0	0	0	0	0	0	0	0	0	0	0	0	0	0	0	0.351	0.371	0.363	0.341	2.130	0.341	0.842	0.000	0.000	0.000	0.000	0.000	0.000	0.000	0.000	0.000	0.000	0.000	0.000	0.000	0.000	80	492	31396	28535	-1.512	Error	Error	8150	23246	0	0	7725	20810	0	0	0	0
1	17	6	""	"YLR218C"	5110	15450	120	4541	3797	1817	86	248	1111	83	75	0	3664	3088	1505	263	759	3330	54	0	0	0	0	0	0	0	0	0	0	0	0	0	0	0	0	0	0	0	0	1.310	1.314	1.275	1.303	2.782	0.498	0.471	0.000	0.000	0.000	0.000	0.000	0.000	0.000	0.000	0.000	0.000	0.000	0.000	0.000	0.000	120	584	7856	6536	0.389	Error	Error	4455	3401	0	0	3711	2825	0	0	0	0
1	18	6	"RCK2"	"YLR248W"	5300	15450	110	7989	7591	3485	87	231	876	95	90	0	4763	4532	1670	274	380	587	95	92	0	0	0	0	0	0	0	0	0	0	0	0	0	0	0	0	0	0	0	1.760	1.762	1.736	1.626	1.735	1.885	0.844	0.000	0.000	0.000	0.000	0.000	0.000	0.000	0.000	0.000	0.000	0.000	0.000	0.000	0.000	80	522	12391	11762	0.816	Error	Error	7902	4489	0	0	7504	4258	0	0	0	0
1	19	6	""	"YLR278C"	5500	15460	110	896	866	502	91	220	875	45	5	0	1107	1103	681	277	381	633	60	25	0	0	0	0	0	0	0	0	0	0	0	0	0	0	0	0	0	0	0	0.970	0.938	0.865	0.821	3.315	0.802	0.708	0.000	0.000	0.000	0.000	0.000	0.000	0.000	0.000	0.000	0.000	0.000	0.000	0.000	0.000	80	520	1635	1601	-0.044	Error	Error	805	830	0	0	775	826	0	0	0	0
1	20	6	"CCC1"	"YLR220W"	5680	15450	110	5524	4942	2395	96	239	795	88	82	0	10806	10213	4733	289	633	1947	87	81	0	0	0	0	0	0	0	0	0	0	0	0	0	0	0	0	0	0	0	0.516	0.488	0.479	0.448	1.642	0.462	0.859	0.000	0.000	0.000	0.000	0.000	0.000	0.000	0.000	0.000	0.000	0.000	0.000	0.000	0.000	80	540	15945	14770	-0.954	Error	Error	5428	10517	0	0	4846	9924	0	0	0	0
1	21	6	"SSP120"	"YLR250W"	5880	15450	110	4474	4114	2034	94	271	848	83	80	0	7086	6176	3094	290	716	2111	80	76	0	0	0	0	0	0	0	0	0	0	0	0	0	0	0	0	0	0	0	0.644	0.683	0.699	0.693	2.183	0.640	0.849	0.000	0.000	0.000	0.000	0.000	0.000	0.000	0.000	0.000	0.000	0.000	0.000	0.000	0.000	80	518	11176	9906	-0.634	Error	Error	4380	6796	0	0	4020	5886	0	0	0	0
1	22	6	""	"YLR280C"	6070	15460	120	888	861	473	90	190	712	56	6	0	1171	1257	1413	272	406	933	46	3	0	0	0	0	0	0	0	0	0	0	0	0	0	0	0	0	0	0	0	0.888	0.783	0.892	0.850	2.667	0.376	0.447	0.000	0.000	0.000	0.000	0.000	0.000	0.000	0.000	0.000	0.000	0.000	0.000	0.000	0.000	120	654	1697	1756	-0.172	Error	Error	798	899	0	0	771	985	0	0	0	0
1	1	7	"CTK3"	"YML112W"	2080	15640	120	11629	10032	4862	65	176	989	89	85	0	8815	7576	3684	229	390	1514	88	79	0	0	0	0	0	0	0	0	0	0	0	0	0	0	0	0	0	0	0	1.347	1.357	1.275	1.332	2.537	1.368	0.825	0.000	0.000	0.000	0.000	0.000	0.000	0.000	0.000	0.000	0.000	0.000	0.000	0.000	0.000	120	644	20150	17314	0.430	Error	Error	11564	8586	0	0	9967	7347	0	0	0	0
1	2	7	""	"YMR010W"	2270	15640	110	8880	7617	3953	74	223	1037	86	80	0	7250	6235	3034	242	386	958	90	85	0	0	0	0	0	0	0	0	0	0	0	0	0	0	0	0	0	0	0	1.257	1.259	1.199	1.160	2.063	1.273	0.819	0.000	0.000	0.000	0.000	0.000	0.000	0.000	0.000	0.000	0.000	0.000	0.000	0.000	0.000	80	493	15814	13536	0.329	Error	Error	8806	7008	0	0	7543	5993	0	0	0	0
1	3	7	""	"YMR041C"	2460	15640	110	7186	6391	3227	83	346	1371	83	80	0	7375	6536	3302	252	541	1438	86	77	0	0	0	0	0	0	0	0	0	0	0	0	0	0	0	0	0	0	0	0.997	1.004	0.920	0.956	2.406	0.972	0.782	0.000	0.000	0.000	0.000	0.000	0.000	0.000	0.000	0.000	0.000	0.000	0.000	0.000	0.000	80	511	14226	12592	-0.004	Error	Error	7103	7123	0	0	6308	6284	0	0	0	0
1	4	7	""	"YML114C"	2650	15640	110	8057	6858	3235	82	332	1295	87	82	0	6060	5514	2581	260	525	1357	86	78	0	0	0	0	0	0	0	0	0	0	0	0	0	0	0	0	0	0	0	1.375	1.290	1.243	1.250	1.831	1.287	0.847	0.000	0.000	0.000	0.000	0.000	0.000	0.000	0.000	0.000	0.000	0.000	0.000	0.000	0.000	80	511	13775	12030	0.459	Error	Error	7975	5800	0	0	6776	5254	0	0	0	0
1	5	7	"CLU1"	"YMR012W"	2840	15640	110	518	473	233	80	247	971	0	0	0	807	782	410	249	407	871	21	0	0	0	0	0	0	0	0	0	0	0	0	0	0	0	0	0	0	0	0	0.785	0.737	0.645	0.599	2.196	0.536	0.638	0.000	0.000	0.000	0.000	0.000	0.000	0.000	0.000	0.000	0.000	0.000	0.000	0.000	0.000	80	482	996	926	-0.349	Error	Error	438	558	0	0	393	533	0	0	0	0
1	6	7	"mcm1"	"YMR043W"	3020	15630	150	84	110	80	78	254	1041	0	0	0	270	314	203	242	681	2657	0	0	0	0	0	0	0	0	0	0	0	0	0	0	0	0	0	0	0	0	0	0.214	0.444	0.302	0.278	3.010	0.535	0.762	0.000	0.000	0.000	0.000	0.000	0.000	0.000	0.000	0.000	0.000	0.000	0.000	0.000	0.000	156	743	34	104	-2.222	Error	Error	6	28	0	0	32	72	0	0	-50	0
1	7	7	"atr1"	"YML116W"	3220	15640	110	7266	6371	2565	78	196	797	100	96	0	15258	14570	4622	258	622	2200	100	97	0	0	0	0	0	0	0	0	0	0	0	0	0	0	0	0	0	0	0	0.479	0.440	0.442	0.414	1.444	0.425	0.867	0.000	0.000	0.000	0.000	0.000	0.000	0.000	0.000	0.000	0.000	0.000	0.000	0.000	0.000	80	504	22188	20605	-1.061	Error	Error	7188	15000	0	0	6293	14312	0	0	0	0
1	8	7	""	"YMR014W"	3420	15640	110	5170	5066	2431	83	290	1014	92	82	0	9989	10069	4544	271	767	2416	96	85	0	0	0	0	0	0	0	0	0	0	0	0	0	0	0	0	0	0	0	0.523	0.509	0.492	0.487	1.556	0.484	0.858	0.000	0.000	0.000	0.000	0.000	0.000	0.000	0.000	0.000	0.000	0.000	0.000	0.000	0.000	80	553	14805	14781	-0.934	Error	Error	5087	9718	0	0	4983	9798	0	0	0	0
1	9	7	""	"YMR045C"	3610	15640	110	19740	18583	9323	81	358	1726	95	88	0	25604	23861	11610	264	739	2799	92	85	0	0	0	0	0	0	0	0	0	0	0	0	0	0	0	0	0	0	0	0.776	0.784	0.783	0.777	1.811	0.775	0.843	0.000	0.000	0.000	0.000	0.000	0.000	0.000	0.000	0.000	0.000	0.000	0.000	0.000	0.000	80	532	44999	42099	-0.366	Error	Error	19659	25340	0	0	18502	23597	0	0	0	0
1	10	7	""	"YML117W-A"	3800	15640	110	3464	3275	1742	83	368	1826	75	43	0	5864	5485	2931	252	643	2529	77	63	0	0	0	0	0	0	0	0	0	0	0	0	0	0	0	0	0	0	0	0.602	0.610	0.606	0.617	2.609	0.577	0.814	0.000	0.000	0.000	0.000	0.000	0.000	0.000	0.000	0.000	0.000	0.000	0.000	0.000	0.000	80	526	8993	8425	-0.731	Error	Error	3381	5612	0	0	3192	5233	0	0	0	0
1	11	7	"SOK2"	"YMR016C"	4000	15650	120	9385	9297	3691	86	133	363	99	99	0	9095	8685	3516	260	351	694	95	95	0	0	0	0	0	0	0	0	0	0	0	0	0	0	0	0	0	0	0	1.053	1.093	1.067	1.130	2.240	1.089	0.870	0.000	0.000	0.000	0.000	0.000	0.000	0.000	0.000	0.000	0.000	0.000	0.000	0.000	0.000	120	556	18134	17636	0.074	Error	Error	9299	8835	0	0	9211	8425	0	0	0	0
1	12	7	""	"YMR046W-A"	4190	15650	120	21361	16776	8425	91	103	83	100	100	0	29569	23559	12511	277	292	108	99	98	0	0	0	0	0	0	0	0	0	0	0	0	0	0	0	0	0	0	0	0.726	0.717	0.728	0.825	3.305	0.685	0.821	0.000	0.000	0.000	0.000	0.000	0.000	0.000	0.000	0.000	0.000	0.000	0.000	0.000	0.000	120	558	50562	39967	-0.462	Error	Error	21270	29292	0	0	16685	23282	0	0	0	0
1	13	7	"PUB1"	"YNL016W"	4380	15640	110	1283	1211	661	85	94	55	93	88	0	1844	1720	936	266	281	104	85	83	0	0	0	0	0	0	0	0	0	0	0	0	0	0	0	0	0	0	0	0.759	0.774	0.744	0.733	2.042	0.720	0.744	0.000	0.000	0.000	0.000	0.000	0.000	0.000	0.000	0.000	0.000	0.000	0.000	0.000	0.000	80	484	2776	2580	-0.397	Error	Error	1198	1578	0	0	1126	1454	0	0	0	0
1	14	7	"ALG11"	"YNL048W"	4560	15640	110	8965	8363	3784	88	284	1206	96	87	0	14186	13189	5685	267	540	1870	100	90	0	0	0	0	0	0	0	0	0	0	0	0	0	0	0	0	0	0	0	0.638	0.640	0.630	0.621	1.669	0.617	0.830	0.000	0.000	0.000	0.000	0.000	0.000	0.000	0.000	0.000	0.000	0.000	0.000	0.000	0.000	80	528	22796	21197	-0.649	Error	Error	8877	13919	0	0	8275	12922	0	0	0	0
1	15	7	"TPM1"	"YNL079C"	4760	15640	110	4038	3744	2005	86	219	937	87	77	0	3551	3246	1587	264	504	1782	76	46	0	0	0	0	0	0	0	0	0	0	0	0	0	0	0	0	0	0	0	1.202	1.227	1.280	1.188	2.017	1.265	0.850	0.000	0.000	0.000	0.000	0.000	0.000	0.000	0.000	0.000	0.000	0.000	0.000	0.000	0.000	80	511	7239	6640	0.266	Error	Error	3952	3287	0	0	3658	2982	0	0	0	0
1	16	7	""	"YNL018C"	4940	15640	110	10949	10384	5085	85	317	1356	93	88	0	11932	11164	5138	266	541	1772	91	85	0	0	0	0	0	0	0	0	0	0	0	0	0	0	0	0	0	0	0	0.931	0.945	0.971	0.911	1.653	0.949	0.852	0.000	0.000	0.000	0.000	0.000	0.000	0.000	0.000	0.000	0.000	0.000	0.000	0.000	0.000	80	526	22530	21197	-0.103	Error	Error	10864	11666	0	0	10299	10898	0	0	0	0
1	17	7	""	"YNL050C"	5140	15640	110	4299	3921	2072	88	271	1193	82	71	0	11442	10578	4990	264	526	1539	92	85	0	0	0	0	0	0	0	0	0	0	0	0	0	0	0	0	0	0	0	0.377	0.372	0.383	0.347	2.275	0.360	0.824	0.000	0.000	0.000	0.000	0.000	0.000	0.000	0.000	0.000	0.000	0.000	0.000	0.000	0.000	80	523	15389	14147	-1.408	Error	Error	4211	11178	0	0	3833	10314	0	0	0	0
1	18	7	""	"YNL081C"	5330	15640	110	3166	2599	1493	102	200	625	81	73	0	10763	8771	5286	292	512	1304	80	75	0	0	0	0	0	0	0	0	0	0	0	0	0	0	0	0	0	0	0	0.293	0.294	0.294	0.317	2.878	0.269	0.820	0.000	0.000	0.000	0.000	0.000	0.000	0.000	0.000	0.000	0.000	0.000	0.000	0.000	0.000	80	513	13535	10976	-1.773	Error	Error	3064	10471	0	0	2497	8479	0	0	0	0
1	19	7	"ARK1"	"YNL020C"	5520	15650	120	7713	6741	2972	102	144	276	97	95	0	13149	11121	5297	295	431	1081	93	87	0	0	0	0	0	0	0	0	0	0	0	0	0	0	0	0	0	0	0	0.592	0.613	0.605	0.637	2.433	0.561	0.789	0.000	0.000	0.000	0.000	0.000	0.000	0.000	0.000	0.000	0.000	0.000	0.000	0.000	0.000	120	585	20465	17465	-0.756	Error	Error	7611	12854	0	0	6639	10826	0	0	0	0
1	20	7	"COX5A"	"YNL052W"	5720	15650	110	3861	3214	1648	89	130	368	88	82	0	7159	6067	3189	277	323	652	85	80	0	0	0	0	0	0	0	0	0	0	0	0	0	0	0	0	0	0	0	0.548	0.540	0.517	0.541	2.431	0.487	0.781	0.000	0.000	0.000	0.000	0.000	0.000	0.000	0.000	0.000	0.000	0.000	0.000	0.000	0.000	80	496	10654	8915	-0.867	Error	Error	3772	6882	0	0	3125	5790	0	0	0	0
1	21	7	""	"YNL083W"	5900	15650	120	7416	6496	3121	83	106	240	97	96	0	8423	7279	3463	271	303	365	95	92	0	0	0	0	0	0	0	0	0	0	0	0	0	0	0	0	0	0	0	0.900	0.915	0.884	0.891	2.479	0.898	0.795	0.000	0.000	0.000	0.000	0.000	0.000	0.000	0.000	0.000	0.000	0.000	0.000	0.000	0.000	120	552	15485	13421	-0.153	Error	Error	7333	8152	0	0	6413	7008	0	0	0	0
1	22	7	""	"YNL022C"	6080	15650	110	8271	7514	3608	88	222	935	95	83	0	6095	5470	2530	265	394	835	93	82	0	0	0	0	0	0	0	0	0	0	0	0	0	0	0	0	0	0	0	1.404	1.427	1.375	1.396	1.748	1.415	0.838	0.000	0.000	0.000	0.000	0.000	0.000	0.000	0.000	0.000	0.000	0.000	0.000	0.000	0.000	80	493	14013	12631	0.489	Error	Error	8183	5830	0	0	7426	5205	0	0	0	0
1	1	8	"VAC7"	"YNL054W"	2100	15830	110	1871	2006	1375	65	91	191	90	86	0	2486	2368	1418	232	262	261	83	81	0	0	0	0	0	0	0	0	0	0	0	0	0	0	0	0	0	0	0	0.801	0.909	0.852	0.901	2.847	0.902	0.732	0.000	0.000	0.000	0.000	0.000	0.000	0.000	0.000	0.000	0.000	0.000	0.000	0.000	0.000	80	544	4060	4077	-0.320	Error	Error	1806	2254	0	0	1941	2136	0	0	0	0
1	2	8	"mkt1"	"YNL085W"	2290	15830	110	6862	6143	3828	72	180	748	87	82	0	10912	9890	5996	238	375	1027	87	78	0	0	0	0	0	0	0	0	0	0	0	0	0	0	0	0	0	0	0	0.636	0.629	0.633	0.648	1.963	0.608	0.813	0.000	0.000	0.000	0.000	0.000	0.000	0.000	0.000	0.000	0.000	0.000	0.000	0.000	0.000	80	528	17464	15723	-0.653	Error	Error	6790	10674	0	0	6071	9652	0	0	0	0
1	3	8	"BIO4"	"YNR057C"	2480	15830	110	6848	5630	3209	72	218	872	82	78	0	8664	7458	4130	238	456	1329	81	75	0	0	0	0	0	0	0	0	0	0	0	0	0	0	0	0	0	0	0	0.804	0.770	0.784	0.719	2.132	0.754	0.858	0.000	0.000	0.000	0.000	0.000	0.000	0.000	0.000	0.000	0.000	0.000	0.000	0.000	0.000	80	538	15202	12778	-0.314	Error	Error	6776	8426	0	0	5558	7220	0	0	0	0
1	4	8	"HTA3"	"YOL012C"	2670	15830	110	3736	3041	1434	72	187	715	85	78	0	3030	2650	1241	245	383	954	82	70	0	0	0	0	0	0	0	0	0	0	0	0	0	0	0	0	0	0	0	1.316	1.235	1.255	1.324	2.459	1.270	0.855	0.000	0.000	0.000	0.000	0.000	0.000	0.000	0.000	0.000	0.000	0.000	0.000	0.000	0.000	80	528	6449	5374	0.396	Error	Error	3664	2785	0	0	2969	2405	0	0	0	0
1	5	8	"NTG2"	"YOL043C"	2860	15830	110	8627	7111	3674	79	257	1146	86	78	0	19008	16539	8400	250	691	2843	86	81	0	0	0	0	0	0	0	0	0	0	0	0	0	0	0	0	0	0	0	0.456	0.432	0.430	0.408	1.637	0.406	0.862	0.000	0.000	0.000	0.000	0.000	0.000	0.000	0.000	0.000	0.000	0.000	0.000	0.000	0.000	80	530	27306	23321	-1.134	Error	Error	8548	18758	0	0	7032	16289	0	0	0	0
1	6	8	""	"YNR059W"	3050	15830	110	6417	6049	3817	78	278	1199	81	76	0	7770	7345	4459	242	737	2925	75	62	0	0	0	0	0	0	0	0	0	0	0	0	0	0	0	0	0	0	0	0.842	0.841	0.827	0.787	2.176	0.809	0.726	0.000	0.000	0.000	0.000	0.000	0.000	0.000	0.000	0.000	0.000	0.000	0.000	0.000	0.000	80	515	13867	13074	-0.248	Error	Error	6339	7528	0	0	5971	7103	0	0	0	0
1	7	8	""	"YOL013W-A"	3240	15830	110	9200	7832	4614	80	225	865	91	81	0	12266	10376	5285	250	490	1436	91	80	0	0	0	0	0	0	0	0	0	0	0	0	0	0	0	0	0	0	0	0.759	0.766	0.763	0.697	1.957	0.780	0.863	0.000	0.000	0.000	0.000	0.000	0.000	0.000	0.000	0.000	0.000	0.000	0.000	0.000	0.000	80	540	21136	17878	-0.398	Error	Error	9120	12016	0	0	7752	10126	0	0	0	0
1	8	8	""	"YOL045W"	3440	15840	110	1245	1222	700	77	173	754	75	22	0	1784	1686	989	245	401	1165	66	11	0	0	0	0	0	0	0	0	0	0	0	0	0	0	0	0	0	0	0	0.759	0.795	0.780	0.822	1.913	0.696	0.713	0.000	0.000	0.000	0.000	0.000	0.000	0.000	0.000	0.000	0.000	0.000	0.000	0.000	0.000	80	511	2707	2586	-0.398	Error	Error	1168	1539	0	0	1145	1441	0	0	0	0
1	9	8	""	"YNR061C"	3620	15830	110	6087	6028	3498	73	188	1258	85	80	0	7089	6276	3397	243	346	1381	82	75	0	0	0	0	0	0	0	0	0	0	0	0	0	0	0	0	0	0	0	0.878	0.987	0.987	0.948	2.225	1.023	0.870	0.000	0.000	0.000	0.000	0.000	0.000	0.000	0.000	0.000	0.000	0.000	0.000	0.000	0.000	80	508	12860	11988	-0.187	Error	Error	6014	6846	0	0	5955	6033	0	0	0	0
1	10	8	""	"YOL015W"	3800	15830	110	6884	6418	3117	80	217	772	96	87	0	9052	8511	3601	243	440	1162	97	90	0	0	0	0	0	0	0	0	0	0	0	0	0	0	0	0	0	0	0	0.772	0.767	0.755	0.713	1.657	0.769	0.851	0.000	0.000	0.000	0.000	0.000	0.000	0.000	0.000	0.000	0.000	0.000	0.000	0.000	0.000	80	510	15613	14606	-0.373	Error	Error	6804	8809	0	0	6338	8268	0	0	0	0
1	11	8	""	"YOL047C"	4000	15830	110	4939	4477	2090	78	203	679	92	85	0	4899	4493	2018	253	426	1097	87	81	0	0	0	0	0	0	0	0	0	0	0	0	0	0	0	0	0	0	0	1.046	1.038	1.069	1.013	1.790	1.041	0.867	0.000	0.000	0.000	0.000	0.000	0.000	0.000	0.000	0.000	0.000	0.000	0.000	0.000	0.000	80	520	9507	8639	0.065	Error	Error	4861	4646	0	0	4399	4240	0	0	0	0
1	12	8	""	"YNR063W"	4200	15840	110	13963	12517	3793	81	127	299	100	100	0	17883	17002	4492	260	312	354	100	100	0	0	0	0	0	0	0	0	0	0	0	0	0	0	0	0	0	0	0	0.788	0.743	0.750	0.727	1.383	0.734	0.892	0.000	0.000	0.000	0.000	0.000	0.000	0.000	0.000	0.000	0.000	0.000	0.000	0.000	0.000	80	467	31505	29178	-0.344	Error	Error	13882	17623	0	0	12436	16742	0	0	0	0
1	13	8	""	"YOL017W"	4370	15830	110	8226	7246	2962	80	131	382	100	100	0	10280	9323	3362	255	346	714	100	100	0	0	0	0	0	0	0	0	0	0	0	0	0	0	0	0	0	0	0	0.813	0.790	0.796	0.760	1.443	0.782	0.885	0.000	0.000	0.000	0.000	0.000	0.000	0.000	0.000	0.000	0.000	0.000	0.000	0.000	0.000	80	487	18171	16234	-0.299	Error	Error	8146	10025	0	0	7166	9068	0	0	0	0
1	14	8	"GSH2"	"YOL049W"	4560	15830	110	1938	2093	1632	85	181	674	81	68	0	4285	4521	3113	262	419	1088	86	72	0	0	0	0	0	0	0	0	0	0	0	0	0	0	0	0	0	0	0	0.461	0.471	0.460	0.468	1.670	0.462	0.811	0.000	0.000	0.000	0.000	0.000	0.000	0.000	0.000	0.000	0.000	0.000	0.000	0.000	0.000	80	522	5876	6267	-1.118	Error	Error	1853	4023	0	0	2008	4259	0	0	0	0
1	15	8	"RIS1"	"YOR191W"	4760	15830	110	379	410	197	80	104	196	76	35	0	737	699	351	250	294	359	68	13	0	0	0	0	0	0	0	0	0	0	0	0	0	0	0	0	0	0	0	0.614	0.735	0.693	0.673	2.115	0.635	0.709	0.000	0.000	0.000	0.000	0.000	0.000	0.000	0.000	0.000	0.000	0.000	0.000	0.000	0.000	80	528	786	779	-0.704	Error	Error	299	487	0	0	330	449	0	0	0	0
1	16	8	"MCT1"	"YOR221C"	4940	15830	110	10371	8649	3823	84	210	953	95	88	0	10382	9143	3851	254	385	977	98	93	0	0	0	0	0	0	0	0	0	0	0	0	0	0	0	0	0	0	0	1.016	0.964	0.975	0.927	1.545	0.959	0.894	0.000	0.000	0.000	0.000	0.000	0.000	0.000	0.000	0.000	0.000	0.000	0.000	0.000	0.000	80	499	20415	17454	0.022	Error	Error	10287	10128	0	0	8565	8889	0	0	0	0
1	17	8	""	"YOR253W"	5130	15830	110	3693	3335	2175	81	173	603	81	75	0	6672	5715	3151	251	393	906	87	75	0	0	0	0	0	0	0	0	0	0	0	0	0	0	0	0	0	0	0	0.563	0.596	0.576	0.523	1.989	0.581	0.820	0.000	0.000	0.000	0.000	0.000	0.000	0.000	0.000	0.000	0.000	0.000	0.000	0.000	0.000	80	485	10033	8718	-0.830	Error	Error	3612	6421	0	0	3254	5464	0	0	0	0
1	18	8	""	"YOR192C-A"	5310	15830	110	47598	41161	18520	92	954	5602	93	86	2	36774	31889	12135	266	1036	4548	97	87	0	0	0	0	0	0	0	0	0	0	0	0	0	0	0	0	0	0	0	1.301	1.299	1.316	1.204	1.584	1.360	0.895	0.000	0.000	0.000	0.000	0.000	0.000	0.000	0.000	0.000	0.000	0.000	0.000	0.000	0.000	80	484	84014	72692	0.380	Error	Error	47506	36508	0	0	41069	31623	0	0	0	0
1	19	8	""	"YOR223W"	5500	15830	110	6776	5834	2549	98	1028	5718	63	0	0	6491	5621	2325	279	1118	4660	76	0	0	0	0	0	0	0	0	0	0	0	0	0	0	0	0	0	0	0	0	1.075	1.074	1.076	1.065	1.764	1.013	0.823	0.000	0.000	0.000	0.000	0.000	0.000	0.000	0.000	0.000	0.000	0.000	0.000	0.000	0.000	80	466	12890	11078	0.104	Error	Error	6678	6212	0	0	5736	5342	0	0	0	0
1	20	8	""	"YOR255W"	5690	15830	110	6999	6181	3131	87	247	854	91	82	0	8951	7693	3874	272	488	1224	88	80	0	0	0	0	0	0	0	0	0	0	0	0	0	0	0	0	0	0	0	0.796	0.821	0.796	0.819	1.887	0.799	0.857	0.000	0.000	0.000	0.000	0.000	0.000	0.000	0.000	0.000	0.000	0.000	0.000	0.000	0.000	80	486	15591	13515	-0.328	Error	Error	6912	8679	0	0	6094	7421	0	0	0	0
1	21	8	""	"YOR193W"	5880	15830	110	3766	3326	1354	85	217	742	88	85	0	3953	3614	1474	264	452	1100	86	80	0	0	0	0	0	0	0	0	0	0	0	0	0	0	0	0	0	0	0	0.998	0.967	0.962	0.974	1.628	0.972	0.892	0.000	0.000	0.000	0.000	0.000	0.000	0.000	0.000	0.000	0.000	0.000	0.000	0.000	0.000	80	462	7370	6591	-0.003	Error	Error	3681	3689	0	0	3241	3350	0	0	0	0
1	22	8	""	"YOR225W"	6080	15840	120	1395	1211	502	87	162	583	83	61	0	1420	1269	587	263	322	439	78	68	0	0	0	0	0	0	0	0	0	0	0	0	0	0	0	0	0	0	0	1.131	1.117	1.118	1.283	2.767	1.027	0.806	0.000	0.000	0.000	0.000	0.000	0.000	0.000	0.000	0.000	0.000	0.000	0.000	0.000	0.000	120	590	2465	2130	0.177	Error	Error	1308	1157	0	0	1124	1006	0	0	0	0
1	1	9	"cdc31"	"YOR257W"	2090	16020	110	6591	5879	4141	65	211	910	78	75	0	6020	5010	3144	238	360	782	76	72	0	0	0	0	0	0	0	0	0	0	0	0	0	0	0	0	0	0	0	1.129	1.218	1.146	1.228	3.161	1.291	0.712	0.000	0.000	0.000	0.000	0.000	0.000	0.000	0.000	0.000	0.000	0.000	0.000	0.000	0.000	80	500	12308	10586	0.175	Error	Error	6526	5782	0	0	5814	4772	0	0	0	0
1	2	9	"SLK19"	"YOR195W"	2270	16020	110	6308	5857	2318	79	278	1016	95	88	0	9501	8635	3366	243	455	1072	92	90	0	0	0	0	0	0	0	0	0	0	0	0	0	0	0	0	0	0	0	0.673	0.689	0.664	0.705	1.728	0.669	0.855	0.000	0.000	0.000	0.000	0.000	0.000	0.000	0.000	0.000	0.000	0.000	0.000	0.000	0.000	80	478	15487	14170	-0.572	Error	Error	6229	9258	0	0	5778	8392	0	0	0	0
1	3	9	""	"YOR227W"	2470	16030	110	1659	1625	953	69	125	366	85	81	0	2313	2349	1425	237	336	744	82	67	0	0	0	0	0	0	0	0	0	0	0	0	0	0	0	0	0	0	0	0.766	0.737	0.702	0.756	2.325	0.621	0.736	0.000	0.000	0.000	0.000	0.000	0.000	0.000	0.000	0.000	0.000	0.000	0.000	0.000	0.000	80	472	3666	3668	-0.385	Error	Error	1590	2076	0	0	1556	2112	0	0	0	0
1	4	9	"RPT4"	"YOR259C"	2650	16020	110	4964	4240	1945	70	197	834	87	82	0	5597	5071	2314	236	398	1050	87	80	0	0	0	0	0	0	0	0	0	0	0	0	0	0	0	0	0	0	0	0.913	0.862	0.892	0.863	1.919	0.841	0.847	0.000	0.000	0.000	0.000	0.000	0.000	0.000	0.000	0.000	0.000	0.000	0.000	0.000	0.000	80	456	10255	9005	-0.131	Error	Error	4894	5361	0	0	4170	4835	0	0	0	0
1	5	9	"NIP100"	"YPL174C"	2830	16020	110	7043	6734	2387	76	259	971	100	98	0	13131	12484	3828	246	530	1494	100	100	0	0	0	0	0	0	0	0	0	0	0	0	0	0	0	0	0	0	0	0.541	0.544	0.548	0.532	1.394	0.534	0.853	0.000	0.000	0.000	0.000	0.000	0.000	0.000	0.000	0.000	0.000	0.000	0.000	0.000	0.000	80	470	19852	18896	-0.887	Error	Error	6967	12885	0	0	6658	12238	0	0	0	0
1	6	9	""	"YPL205C"	3020	16020	110	2879	2526	1064	76	135	362	90	87	0	2751	2439	1089	241	361	795	83	78	0	0	0	0	0	0	0	0	0	0	0	0	0	0	0	0	0	0	0	1.117	1.115	1.065	1.148	1.877	1.095	0.808	0.000	0.000	0.000	0.000	0.000	0.000	0.000	0.000	0.000	0.000	0.000	0.000	0.000	0.000	80	482	5313	4648	0.159	Error	Error	2803	2510	0	0	2450	2198	0	0	0	0
1	7	9	"SUI3"	"YPL237W"	3210	16020	110	7478	6836	2579	74	224	918	100	92	0	9012	8177	2876	244	415	1084	100	91	0	0	0	0	0	0	0	0	0	0	0	0	0	0	0	0	0	0	0	0.844	0.852	0.844	0.845	1.590	0.859	0.839	0.000	0.000	0.000	0.000	0.000	0.000	0.000	0.000	0.000	0.000	0.000	0.000	0.000	0.000	80	512	16172	14695	-0.244	Error	Error	7404	8768	0	0	6762	7933	0	0	0	0
1	8	9	""	"YPL176C"	3400	16020	120	9508	8470	3276	77	495	1939	91	85	0	9946	9120	3534	250	700	2109	92	85	0	0	0	0	0	0	0	0	0	0	0	0	0	0	0	0	0	0	0	0.973	0.946	0.929	0.933	2.040	0.944	0.831	0.000	0.000	0.000	0.000	0.000	0.000	0.000	0.000	0.000	0.000	0.000	0.000	0.000	0.000	120	562	19127	17263	-0.040	Error	Error	9431	9696	0	0	8393	8870	0	0	0	0
1	9	9	""	"YPL207W"	3580	16020	110	8628	8013	2957	74	544	2022	98	86	0	8767	8627	2807	245	764	2224	98	92	0	0	0	0	0	0	0	0	0	0	0	0	0	0	0	0	0	0	0	1.004	0.947	0.940	0.935	1.407	0.953	0.824	0.000	0.000	0.000	0.000	0.000	0.000	0.000	0.000	0.000	0.000	0.000	0.000	0.000	0.000	80	498	17076	16321	0.005	Error	Error	8554	8522	0	0	7939	8382	0	0	0	0
1	10	9	"YAR1"	"YPL239W"	3780	16020	120	5923	5311	1784	73	266	1011	93	89	0	3998	3526	1361	248	473	1283	85	75	0	0	0	0	0	0	0	0	0	0	0	0	0	0	0	0	0	0	0	1.560	1.598	1.543	1.656	1.981	1.499	0.778	0.000	0.000	0.000	0.000	0.000	0.000	0.000	0.000	0.000	0.000	0.000	0.000	0.000	0.000	120	580	9600	8516	0.642	Error	Error	5850	3750	0	0	5238	3278	0	0	0	0
1	11	9	"MUD13"	"YPL178W"	3960	16020	110	4117	3656	1444	75	94	179	100	95	0	8438	7829	2858	243	298	465	97	96	0	0	0	0	0	0	0	0	0	0	0	0	0	0	0	0	0	0	0	0.493	0.472	0.478	0.458	1.805	0.457	0.862	0.000	0.000	0.000	0.000	0.000	0.000	0.000	0.000	0.000	0.000	0.000	0.000	0.000	0.000	80	498	12237	11167	-1.020	Error	Error	4042	8195	0	0	3581	7586	0	0	0	0
1	12	9	"ipl1"	"YPL209C"	4160	16020	120	7552	6758	2712	75	108	254	98	96	0	4452	4137	1452	248	307	484	97	95	0	0	0	0	0	0	0	0	0	0	0	0	0	0	0	0	0	0	0	1.779	1.718	1.698	1.600	2.022	1.823	0.846	0.000	0.000	0.000	0.000	0.000	0.000	0.000	0.000	0.000	0.000	0.000	0.000	0.000	0.000	120	572	11681	10572	0.831	Error	Error	7477	4204	0	0	6683	3889	0	0	0	0
1	13	9	"cin2"	"YPL241C"	4350	16020	120	5056	4474	2017	73	99	289	97	94	0	5489	4919	2197	246	277	430	95	94	0	0	0	0	0	0	0	0	0	0	0	0	0	0	0	0	0	0	0	0.950	0.942	0.914	0.929	2.201	0.915	0.852	0.000	0.000	0.000	0.000	0.000	0.000	0.000	0.000	0.000	0.000	0.000	0.000	0.000	0.000	120	550	10226	9074	-0.073	Error	Error	4983	5243	0	0	4401	4673	0	0	0	0
1	14	9	""	"YPL180W"	4540	16020	120	12354	11592	4846	75	84	105	99	97	0	8974	8317	2713	240	262	237	98	98	0	0	0	0	0	0	0	0	0	0	0	0	0	0	0	0	0	0	0	1.406	1.426	1.413	1.294	1.985	1.524	0.868	0.000	0.000	0.000	0.000	0.000	0.000	0.000	0.000	0.000	0.000	0.000	0.000	0.000	0.000	120	577	21013	19594	0.491	Error	Error	12279	8734	0	0	11517	8077	0	0	0	0
1	15	9	"NIP7"	"YPL211W"	4730	16020	110	4182	3834	1611	76	98	233	97	93	0	5934	5499	2372	244	290	394	98	95	0	0	0	0	0	0	0	0	0	0	0	0	0	0	0	0	0	0	0	0.722	0.715	0.694	0.728	1.859	0.694	0.858	0.000	0.000	0.000	0.000	0.000	0.000	0.000	0.000	0.000	0.000	0.000	0.000	0.000	0.000	80	519	9796	9013	-0.471	Error	Error	4106	5690	0	0	3758	5255	0	0	0	0
1	16	9	"SRP68"	"YPL243W"	4930	16020	120	5505	5093	2600	77	138	530	95	90	0	12288	11518	5543	244	316	584	97	97	0	0	0	0	0	0	0	0	0	0	0	0	0	0	0	0	0	0	0	0.451	0.445	0.438	0.440	2.320	0.426	0.840	0.000	0.000	0.000	0.000	0.000	0.000	0.000	0.000	0.000	0.000	0.000	0.000	0.000	0.000	120	535	17472	16290	-1.150	Error	Error	5428	12044	0	0	5016	11274	0	0	0	0
1	17	9	"EMPTY"	"EMPTY"	5110	16020	150	109	136	91	77	137	508	0	0	0	281	328	173	247	344	719	2	0	0	0	0	0	0	0	0	0	0	0	0	0	0	0	0	0	0	0	0	0.941	0.728	0.539	0.619	4.122	0.355	0.144	0.000	0.000	0.000	0.000	0.000	0.000	0.000	0.000	0.000	0.000	0.000	0.000	0.000	0.000	156	619	66	140	-0.087	Error	Error	32	34	0	0	59	81	0	0	-75	0
1	18	9	"EMPTY"	"EMPTY"	5300	16020	150	100	128	90	77	732	4993	0	0	0	276	337	201	256	807	3936	0	0	0	0	0	0	0	0	0	0	0	0	0	0	0	0	0	0	0	0	0	1.150	0.630	0.509	0.498	3.623	1.350	0.935	0.000	0.000	0.000	0.000	0.000	0.000	0.000	0.000	0.000	0.000	0.000	0.000	0.000	0.000	156	608	43	132	0.202	Error	Error	23	20	0	0	51	81	0	0	-75	0
1	19	9	"EMPTY"	"EMPTY"	5490	16020	150	103	140	110	81	713	4791	0	0	0	281	350	208	263	782	3655	0	0	0	0	0	0	0	0	0	0	0	0	0	0	0	0	0	0	0	0	0	1.222	0.678	0.431	0.436	3.803	0.475	0.160	0.000	0.000	0.000	0.000	0.000	0.000	0.000	0.000	0.000	0.000	0.000	0.000	0.000	0.000	156	611	40	146	0.290	Error	Error	22	18	0	0	59	87	0	0	-75	0
1	20	9	"EMPTY"	"EMPTY"	5680	16020	150	101	125	85	84	196	741	0	0	0	280	319	158	267	414	1037	0	0	0	0	0	0	0	0	0	0	0	0	0	0	0	0	0	0	0	0	0	1.308	0.788	0.441	0.519	3.810	1.530	0.146	0.000	0.000	0.000	0.000	0.000	0.000	0.000	0.000	0.000	0.000	0.000	0.000	0.000	0.000	156	624	30	93	0.387	Error	Error	17	13	0	0	41	52	0	0	-75	0
1	21	9	"EMPTY"	"EMPTY"	5870	16020	150	102	161	159	85	179	628	1	0	0	296	409	312	267	388	862	5	0	0	0	0	0	0	0	0	0	0	0	0	0	0	0	0	0	0	0	0	0.586	0.535	0.416	0.482	4.294	0.504	0.437	0.000	0.000	0.000	0.000	0.000	0.000	0.000	0.000	0.000	0.000	0.000	0.000	0.000	0.000	156	621	46	218	-0.771	Error	Error	17	29	0	0	76	142	0	0	-75	0
1	22	9	"EMPTY"	"EMPTY"	6060	16020	150	115	148	117	84	112	223	8	1	0	306	369	259	269	302	232	16	5	0	0	0	0	0	0	0	0	0	0	0	0	0	0	0	0	0	0	0	0.838	0.640	0.506	0.527	4.077	0.287	0.306	0.000	0.000	0.000	0.000	0.000	0.000	0.000	0.000	0.000	0.000	0.000	0.000	0.000	0.000	156	776	68	164	-0.255	Error	Error	31	37	0	0	64	100	0	0	-75	0
1	1	10	"EMPTY"	"EMPTY"	2080	16200	150	73	83	39	63	142	694	0	0	0	267	285	106	237	308	594	0	0	0	0	0	0	0	0	0	0	0	0	0	0	0	0	0	0	0	0	0	0.333	0.417	0.325	0.354	3.683	1.741	0.833	0.000	0.000	0.000	0.000	0.000	0.000	0.000	0.000	0.000	0.000	0.000	0.000	0.000	0.000	156	845	40	68	-1.585	Error	Error	10	30	0	0	20	48	0	0	-75	0
1	2	10	"EMPTY"	"EMPTY"	2270	16200	150	77	83	36	65	196	841	0	0	0	245	260	109	236	385	901	0	0	0	0	0	0	0	0	0	0	0	0	0	0	0	0	0	0	0	0	0	1.333	0.750	0.378	0.370	3.798	0.779	0.851	0.000	0.000	0.000	0.000	0.000	0.000	0.000	0.000	0.000	0.000	0.000	0.000	0.000	0.000	156	627	21	42	0.415	Error	Error	12	9	0	0	18	24	0	0	-75	0
1	3	10	"EMPTY"	"EMPTY"	2460	16200	150	78	90	56	65	107	307	0	0	0	275	298	122	234	304	634	0	0	0	0	0	0	0	0	0	0	0	0	0	0	0	0	0	0	0	0	0	0.317	0.391	0.425	0.374	2.629	0.226	0.229	0.000	0.000	0.000	0.000	0.000	0.000	0.000	0.000	0.000	0.000	0.000	0.000	0.000	0.000	156	646	54	89	-1.657	Error	Error	13	41	0	0	25	64	0	0	-75	0
1	4	10	"EMPTY"	"EMPTY"	2650	16200	150	74	87	44	66	160	722	0	0	0	265	278	112	232	352	909	0	0	0	0	0	0	0	0	0	0	0	0	0	0	0	0	0	0	0	0	0	0.242	0.457	0.342	0.293	3.718	0.935	0.805	0.000	0.000	0.000	0.000	0.000	0.000	0.000	0.000	0.000	0.000	0.000	0.000	0.000	0.000	156	612	41	67	-2.044	Error	Error	8	33	0	0	21	46	0	0	-75	0
1	5	10	"EMPTY"	"EMPTY"	2840	16200	150	81	92	54	67	183	757	0	0	0	247	294	146	231	403	1086	0	0	0	0	0	0	0	0	0	0	0	0	0	0	0	0	0	0	0	0	0	0.875	0.397	0.423	0.399	3.902	1.487	0.476	0.000	0.000	0.000	0.000	0.000	0.000	0.000	0.000	0.000	0.000	0.000	0.000	0.000	0.000	156	627	30	88	-0.193	Error	Error	14	16	0	0	25	63	0	0	-75	0
1	6	10	"EMPTY"	"EMPTY"	3030	16200	150	81	93	52	66	100	283	0	0	0	232	265	115	231	293	552	0	0	0	0	0	0	0	0	0	0	0	0	0	0	0	0	0	0	0	0	0	15.000	0.794	0.386	0.409	3.832	0.993	0.075	0.000	0.000	0.000	0.000	0.000	0.000	0.000	0.000	0.000	0.000	0.000	0.000	0.000	0.000	156	706	16	61	3.907	Error	Error	15	1	0	0	27	34	0	0	-75	0
1	7	10	""	"iYBL019W"	3230	16210	110	588	549	218	67	82	226	85	61	0	1274	1223	436	237	246	91	96	95	0	0	0	0	0	0	0	0	0	0	0	0	0	0	0	0	0	0	0	0.502	0.489	0.476	0.468	2.037	0.468	0.789	0.000	0.000	0.000	0.000	0.000	0.000	0.000	0.000	0.000	0.000	0.000	0.000	0.000	0.000	80	511	1558	1468	-0.993	Error	Error	521	1037	0	0	482	986	0	0	0	0
1	8	10	""	"iYBL015W"	3420	16210	110	6660	5904	2423	72	89	151	100	100	0	12629	11592	4090	241	261	202	100	100	0	0	0	0	0	0	0	0	0	0	0	0	0	0	0	0	0	0	0	0.532	0.514	0.521	0.496	1.633	0.509	0.872	0.000	0.000	0.000	0.000	0.000	0.000	0.000	0.000	0.000	0.000	0.000	0.000	0.000	0.000	80	512	18976	17183	-0.911	Error	Error	6588	12388	0	0	5832	11351	0	0	0	0
1	9	10	""	"iYBL014C"	3610	16210	110	2654	2354	905	71	115	446	96	88	0	2128	2120	659	240	281	423	100	91	0	0	0	0	0	0	0	0	0	0	0	0	0	0	0	0	0	0	0	1.368	1.214	1.242	1.149	1.534	1.304	0.868	0.000	0.000	0.000	0.000	0.000	0.000	0.000	0.000	0.000	0.000	0.000	0.000	0.000	0.000	80	526	4471	4163	0.452	Error	Error	2583	1888	0	0	2283	1880	0	0	0	0
1	10	10	""	"iYBR001C"	3810	16220	120	2188	2022	674	69	73	34	100	100	0	2697	2565	777	244	248	74	98	96	0	0	0	0	0	0	0	0	0	0	0	0	0	0	0	0	0	0	0	0.864	0.841	0.852	0.842	1.843	0.836	0.861	0.000	0.000	0.000	0.000	0.000	0.000	0.000	0.000	0.000	0.000	0.000	0.000	0.000	0.000	120	565	4572	4274	-0.211	Error	Error	2119	2453	0	0	1953	2321	0	0	0	0
1	11	10	""	"iYBR005W"	3990	16210	110	4880	4527	1646	74	100	234	100	100	0	8333	7905	2739	247	288	407	100	100	0	0	0	0	0	0	0	0	0	0	0	0	0	0	0	0	0	0	0	0.594	0.581	0.572	0.573	1.463	0.563	0.873	0.000	0.000	0.000	0.000	0.000	0.000	0.000	0.000	0.000	0.000	0.000	0.000	0.000	0.000	80	519	12892	12111	-0.751	Error	Error	4806	8086	0	0	4453	7658	0	0	0	0
1	12	10	""	"iYBR008C"	4190	16210	110	5717	5249	2607	72	88	160	100	97	0	5980	5547	2431	245	269	318	98	96	0	0	0	0	0	0	0	0	0	0	0	0	0	0	0	0	0	0	0	0.984	0.976	0.988	0.931	1.880	1.022	0.876	0.000	0.000	0.000	0.000	0.000	0.000	0.000	0.000	0.000	0.000	0.000	0.000	0.000	0.000	80	523	11380	10479	-0.023	Error	Error	5645	5735	0	0	5177	5302	0	0	0	0
1	13	10	""	"iYBR022W"	4380	16220	110	1018	920	365	69	76	50	100	95	0	2733	2452	969	239	245	69	97	96	0	0	0	0	0	0	0	0	0	0	0	0	0	0	0	0	0	0	0	0.381	0.385	0.386	0.428	2.555	0.350	0.841	0.000	0.000	0.000	0.000	0.000	0.000	0.000	0.000	0.000	0.000	0.000	0.000	0.000	0.000	80	502	3443	3064	-1.394	Error	Error	949	2494	0	0	851	2213	0	0	0	0
1	14	10	""	"iYBR027C"	4560	16220	100	616	551	268	69	72	26	95	91	0	1185	1096	451	239	246	77	95	93	0	0	0	0	0	0	0	0	0	0	0	0	0	0	0	0	0	0	0	0.578	0.562	0.539	0.532	2.036	0.542	0.780	0.000	0.000	0.000	0.000	0.000	0.000	0.000	0.000	0.000	0.000	0.000	0.000	0.000	0.000	80	450	1493	1339	-0.790	Error	Error	547	946	0	0	482	857	0	0	0	0
1	15	10	""	"iYBR031W"	4750	16220	110	1191	1088	396	74	87	192	93	87	0	3116	2826	939	244	261	207	100	96	0	0	0	0	0	0	0	0	0	0	0	0	0	0	0	0	0	0	0	0.389	0.393	0.380	0.383	1.568	0.371	0.855	0.000	0.000	0.000	0.000	0.000	0.000	0.000	0.000	0.000	0.000	0.000	0.000	0.000	0.000	80	523	3989	3596	-1.362	Error	Error	1117	2872	0	0	1014	2582	0	0	0	0
1	16	10	""	"iYBRWdelta16"	4950	16220	120	4278	3744	1761	75	78	32	97	97	0	6647	6006	2666	242	248	71	99	98	0	0	0	0	0	0	0	0	0	0	0	0	0	0	0	0	0	0	0	0.656	0.637	0.636	0.598	2.181	0.622	0.871	0.000	0.000	0.000	0.000	0.000	0.000	0.000	0.000	0.000	0.000	0.000	0.000	0.000	0.000	120	563	10608	9433	-0.608	Error	Error	4203	6405	0	0	3669	5764	0	0	0	0
1	17	10	""	"iYBR048W"	5140	16220	120	3681	3310	1802	75	78	31	100	96	0	10684	9899	5661	247	256	79	98	97	0	0	0	0	0	0	0	0	0	0	0	0	0	0	0	0	0	0	0	0.346	0.335	0.332	0.344	2.776	0.311	0.874	0.000	0.000	0.000	0.000	0.000	0.000	0.000	0.000	0.000	0.000	0.000	0.000	0.000	0.000	120	528	14043	12887	-1.533	Error	Error	3606	10437	0	0	3235	9652	0	0	0	0
1	18	10	""	"iYBR053C-0"	5340	16220	120	4570	4143	1919	79	83	32	99	99	0	3940	3471	1525	264	279	123	94	93	0	0	0	0	0	0	0	0	0	0	0	0	0	0	0	0	0	0	0	1.222	1.267	1.277	1.204	2.155	1.298	0.852	0.000	0.000	0.000	0.000	0.000	0.000	0.000	0.000	0.000	0.000	0.000	0.000	0.000	0.000	120	519	8167	7271	0.289	Error	Error	4491	3676	0	0	4064	3207	0	0	0	0
1	19	10	""	"iYCR022C"	5510	16210	110	3331	3076	1155	85	102	186	100	100	0	6176	5793	1987	274	314	373	100	100	0	0	0	0	0	0	0	0	0	0	0	0	0	0	0	0	0	0	0	0.550	0.542	0.531	0.536	1.408	0.530	0.845	0.000	0.000	0.000	0.000	0.000	0.000	0.000	0.000	0.000	0.000	0.000	0.000	0.000	0.000	80	446	9148	8510	-0.863	Error	Error	3246	5902	0	0	2991	5519	0	0	0	0
1	20	10	""	"iYCR025C"	5700	16220	120	2445	2198	1078	91	106	169	94	90	0	2030	1867	864	273	319	371	86	75	0	0	0	0	0	0	0	0	0	0	0	0	0	0	0	0	0	0	0	1.340	1.322	1.286	1.405	2.291	1.331	0.844	0.000	0.000	0.000	0.000	0.000	0.000	0.000	0.000	0.000	0.000	0.000	0.000	0.000	0.000	120	560	4111	3701	0.422	Error	Error	2354	1757	0	0	2107	1594	0	0	0	0
1	21	10	""	"iYCRWdelta11"	5890	16210	110	4298	4066	1513	87	93	45	100	100	0	10159	9330	3015	277	292	103	100	100	0	0	0	0	0	0	0	0	0	0	0	0	0	0	0	0	0	0	0	0.426	0.440	0.433	0.432	1.339	0.431	0.899	0.000	0.000	0.000	0.000	0.000	0.000	0.000	0.000	0.000	0.000	0.000	0.000	0.000	0.000	80	480	14093	13032	-1.231	Error	Error	4211	9882	0	0	3979	9053	0	0	0	0
1	22	10	""	"iYCR043C"	6080	16210	110	1056	921	371	84	90	47	96	93	0	1347	1255	426	281	296	101	95	91	0	0	0	0	0	0	0	0	0	0	0	0	0	0	0	0	0	0	0	0.912	0.859	0.883	0.756	1.909	0.842	0.777	0.000	0.000	0.000	0.000	0.000	0.000	0.000	0.000	0.000	0.000	0.000	0.000	0.000	0.000	80	529	2038	1811	-0.133	Error	Error	972	1066	0	0	837	974	0	0	0	0
1	1	11	""	"iYCR047C"	2100	16400	100	3911	3816	1031	62	65	24	100	100	0	3009	2985	736	234	241	73	100	100	0	0	0	0	0	0	0	0	0	0	0	0	0	0	0	0	0	0	0	1.387	1.365	1.345	1.369	1.252	1.360	0.892	0.000	0.000	0.000	0.000	0.000	0.000	0.000	0.000	0.000	0.000	0.000	0.000	0.000	0.000	80	471	6624	6505	0.472	Error	Error	3849	2775	0	0	3754	2751	0	0	0	0
1	2	11	""	"iYCR053W"	2280	16400	100	1338	1251	364	65	81	139	98	97	0	6080	5703	1705	239	248	75	100	100	0	0	0	0	0	0	0	0	0	0	0	0	0	0	0	0	0	0	0	0.218	0.217	0.210	0.219	1.349	0.199	0.863	0.000	0.000	0.000	0.000	0.000	0.000	0.000	0.000	0.000	0.000	0.000	0.000	0.000	0.000	80	473	7114	6650	-2.198	Error	Error	1273	5841	0	0	1186	5464	0	0	0	0
1	3	11	""	"iYCR075C"	2490	16410	110	4606	4276	1558	69	97	222	100	97	0	6487	6046	2264	239	256	184	100	100	0	0	0	0	0	0	0	0	0	0	0	0	0	0	0	0	0	0	0	0.726	0.724	0.740	0.748	1.567	0.704	0.868	0.000	0.000	0.000	0.000	0.000	0.000	0.000	0.000	0.000	0.000	0.000	0.000	0.000	0.000	80	523	10785	10014	-0.462	Error	Error	4537	6248	0	0	4207	5807	0	0	0	0
1	4	11	""	"iYCR081W"	2670	16400	100	3009	2766	961	72	76	33	100	100	0	5173	4713	1682	238	247	127	100	100	0	0	0	0	0	0	0	0	0	0	0	0	0	0	0	0	0	0	0	0.595	0.602	0.600	0.618	1.624	0.573	0.869	0.000	0.000	0.000	0.000	0.000	0.000	0.000	0.000	0.000	0.000	0.000	0.000	0.000	0.000	80	450	7872	7169	-0.749	Error	Error	2937	4935	0	0	2694	4475	0	0	0	0
1	5	11	""	"iYCR085W"	2860	16400	100	1820	1873	825	68	70	29	100	100	0	1675	1650	640	231	233	68	98	96	0	0	0	0	0	0	0	0	0	0	0	0	0	0	0	0	0	0	0	1.213	1.272	1.354	1.299	1.771	1.283	0.790	0.000	0.000	0.000	0.000	0.000	0.000	0.000	0.000	0.000	0.000	0.000	0.000	0.000	0.000	80	468	3196	3224	0.279	Error	Error	1752	1444	0	0	1805	1419	0	0	0	0
1	6	11	""	"itT(AGU)C"	3060	16400	110	3001	2792	1241	70	75	36	98	97	0	5403	4909	2171	231	240	86	98	98	0	0	0	0	0	0	0	0	0	0	0	0	0	0	0	0	0	0	0	0.567	0.582	0.558	0.584	2.381	0.555	0.849	0.000	0.000	0.000	0.000	0.000	0.000	0.000	0.000	0.000	0.000	0.000	0.000	0.000	0.000	80	513	8103	7400	-0.819	Error	Error	2931	5172	0	0	2722	4678	0	0	0	0
1	7	11	""	"iYCR100C"	3240	16400	100	3625	3269	1260	73	79	38	100	100	0	3774	3502	1444	243	255	87	96	95	0	0	0	0	0	0	0	0	0	0	0	0	0	0	0	0	0	0	0	1.006	0.981	0.982	1.061	2.018	0.931	0.864	0.000	0.000	0.000	0.000	0.000	0.000	0.000	0.000	0.000	0.000	0.000	0.000	0.000	0.000	80	463	7083	6455	0.009	Error	Error	3552	3531	0	0	3196	3259	0	0	0	0
1	8	11	""	"iYCR103C"	3430	16400	100	12471	10959	4436	77	105	219	100	98	0	14475	13200	5416	256	313	555	100	97	0	0	0	0	0	0	0	0	0	0	0	0	0	0	0	0	0	0	0	0.872	0.841	0.833	0.837	1.691	0.792	0.862	0.000	0.000	0.000	0.000	0.000	0.000	0.000	0.000	0.000	0.000	0.000	0.000	0.000	0.000	80	481	26613	23826	-0.198	Error	Error	12394	14219	0	0	10882	12944	0	0	0	0
1	9	11	""	"iYDR045C"	3630	16400	110	3121	2714	1075	74	99	209	98	93	0	7812	7290	2565	254	303	531	100	96	0	0	0	0	0	0	0	0	0	0	0	0	0	0	0	0	0	0	0	0.403	0.375	0.393	0.358	1.742	0.367	0.854	0.000	0.000	0.000	0.000	0.000	0.000	0.000	0.000	0.000	0.000	0.000	0.000	0.000	0.000	80	528	10605	9676	-1.311	Error	Error	3047	7558	0	0	2640	7036	0	0	0	0
1	10	11	""	"iYDR050C"	3810	16400	110	4699	4184	2008	75	107	238	96	90	0	4911	4695	2194	249	311	468	92	90	0	0	0	0	0	0	0	0	0	0	0	0	0	0	0	0	0	0	0	0.992	0.924	0.896	0.885	2.136	0.879	0.835	0.000	0.000	0.000	0.000	0.000	0.000	0.000	0.000	0.000	0.000	0.000	0.000	0.000	0.000	80	486	9286	8555	-0.012	Error	Error	4624	4662	0	0	4109	4446	0	0	0	0
1	11	11	""	"iYDR055W"	4000	16410	100	1072	947	337	75	107	230	91	85	0	1604	1477	577	248	303	389	87	82	0	0	0	0	0	0	0	0	0	0	0	0	0	0	0	0	0	0	0	0.735	0.710	0.694	0.733	1.729	0.632	0.816	0.000	0.000	0.000	0.000	0.000	0.000	0.000	0.000	0.000	0.000	0.000	0.000	0.000	0.000	80	482	2353	2101	-0.444	Error	Error	997	1356	0	0	872	1229	0	0	0	0
1	12	11	""	"iYDR070C"	4200	16400	110	2440	2110	866	71	85	74	98	98	0	3135	2869	1000	245	263	117	96	96	0	0	0	0	0	0	0	0	0	0	0	0	0	0	0	0	0	0	0	0.820	0.777	0.779	0.755	1.672	0.769	0.870	0.000	0.000	0.000	0.000	0.000	0.000	0.000	0.000	0.000	0.000	0.000	0.000	0.000	0.000	80	530	5259	4663	-0.287	Error	Error	2369	2890	0	0	2039	2624	0	0	0	0
1	13	11	""	"iYDR074W"	4380	16400	110	3623	3187	1229	71	103	305	97	93	0	4533	4253	1576	244	329	703	95	90	0	0	0	0	0	0	0	0	0	0	0	0	0	0	0	0	0	0	0	0.828	0.777	0.799	0.765	1.670	0.737	0.862	0.000	0.000	0.000	0.000	0.000	0.000	0.000	0.000	0.000	0.000	0.000	0.000	0.000	0.000	80	518	7841	7125	-0.272	Error	Error	3552	4289	0	0	3116	4009	0	0	0	0
1	14	11	""	"iYDR078C"	4570	16400	110	1416	1262	477	72	79	57	98	97	0	2519	2340	913	242	263	197	93	90	0	0	0	0	0	0	0	0	0	0	0	0	0	0	0	0	0	0	0	0.590	0.567	0.574	0.557	1.657	0.517	0.812	0.000	0.000	0.000	0.000	0.000	0.000	0.000	0.000	0.000	0.000	0.000	0.000	0.000	0.000	80	518	3621	3288	-0.761	Error	Error	1344	2277	0	0	1190	2098	0	0	0	0
1	15	11	""	"iYDR092W"	4760	16400	110	2429	2250	938	75	108	276	92	90	0	2055	2001	741	250	295	370	93	87	0	0	0	0	0	0	0	0	0	0	0	0	0	0	0	0	0	0	0	1.304	1.242	1.247	1.150	1.563	1.310	0.831	0.000	0.000	0.000	0.000	0.000	0.000	0.000	0.000	0.000	0.000	0.000	0.000	0.000	0.000	80	530	4159	3926	0.383	Error	Error	2354	1805	0	0	2175	1751	0	0	0	0
1	16	11	""	"iYDR098C"	4960	16410	110	641	604	218	70	92	167	90	82	0	1300	1241	480	241	275	266	90	83	0	0	0	0	0	0	0	0	0	0	0	0	0	0	0	0	0	0	0	0.539	0.534	0.557	0.536	1.538	0.427	0.710	0.000	0.000	0.000	0.000	0.000	0.000	0.000	0.000	0.000	0.000	0.000	0.000	0.000	0.000	80	513	1630	1534	-0.891	Error	Error	571	1059	0	0	534	1000	0	0	0	0
1	17	11	""	"iYDRCdelta9-1"	5140	16410	110	669	701	392	74	107	297	78	50	0	893	852	424	242	397	1508	1	0	0	0	0	0	0	0	0	0	0	0	0	0	0	0	0	0	0	0	0	0.914	1.028	1.000	0.878	2.404	0.933	0.738	0.000	0.000	0.000	0.000	0.000	0.000	0.000	0.000	0.000	0.000	0.000	0.000	0.000	0.000	80	490	1246	1237	-0.130	Error	Error	595	651	0	0	627	610	0	0	0	0
1	18	11	""	"iYDR115W"	5330	16410	100	972	874	330	85	125	245	88	80	0	1381	1285	502	259	317	336	85	81	0	0	0	0	0	0	0	0	0	0	0	0	0	0	0	0	0	0	0	0.791	0.769	0.750	0.757	1.809	0.699	0.779	0.000	0.000	0.000	0.000	0.000	0.000	0.000	0.000	0.000	0.000	0.000	0.000	0.000	0.000	80	471	2009	1815	-0.339	Error	Error	887	1122	0	0	789	1026	0	0	0	0
1	19	11	""	"iYDR119W"	5540	16410	110	3469	3102	1428	90	196	1060	87	72	0	7126	6208	2744	268	491	2043	83	75	0	0	0	0	0	0	0	0	0	0	0	0	0	0	0	0	0	0	0	0.493	0.507	0.513	0.510	1.866	0.464	0.832	0.000	0.000	0.000	0.000	0.000	0.000	0.000	0.000	0.000	0.000	0.000	0.000	0.000	0.000	80	526	10237	8952	-1.021	Error	Error	3379	6858	0	0	3012	5940	0	0	0	0
1	20	11	""	"iYDR123C"	5710	16410	110	3134	2959	1594	90	117	200	97	88	0	4749	4462	2168	269	338	484	90	86	0	0	0	0	0	0	0	0	0	0	0	0	0	0	0	0	0	0	0	0.679	0.684	0.673	0.677	1.812	0.672	0.816	0.000	0.000	0.000	0.000	0.000	0.000	0.000	0.000	0.000	0.000	0.000	0.000	0.000	0.000	80	462	7524	7062	-0.558	Error	Error	3044	4480	0	0	2869	4193	0	0	0	0
1	21	11	""	"iYDR431W"	5900	16400	110	428	407	211	87	134	383	40	1	0	691	685	306	275	440	1490	0	0	0	0	0	0	0	0	0	0	0	0	0	0	0	0	0	0	0	0	0	0.820	0.780	0.753	0.695	2.251	0.681	0.628	0.000	0.000	0.000	0.000	0.000	0.000	0.000	0.000	0.000	0.000	0.000	0.000	0.000	0.000	80	528	757	730	-0.287	Error	Error	341	416	0	0	320	410	0	0	0	0
1	22	11	""	"iYDR436W"	6080	16400	110	2300	2122	1168	81	102	167	91	87	0	2656	2480	1282	267	302	254	87	81	0	0	0	0	0	0	0	0	0	0	0	0	0	0	0	0	0	0	0	0.929	0.922	0.940	0.886	2.302	0.906	0.828	0.000	0.000	0.000	0.000	0.000	0.000	0.000	0.000	0.000	0.000	0.000	0.000	0.000	0.000	80	548	4608	4254	-0.106	Error	Error	2219	2389	0	0	2041	2213	0	0	0	0
1	1	12	""	"iYDR439W-1"	2090	16590	110	6973	5974	2704	66	209	951	91	83	0	10566	9466	3739	239	533	1794	97	85	0	0	0	0	0	0	0	0	0	0	0	0	0	0	0	0	0	0	0	0.669	0.640	0.644	0.582	1.777	0.615	0.840	0.000	0.000	0.000	0.000	0.000	0.000	0.000	0.000	0.000	0.000	0.000	0.000	0.000	0.000	80	558	17234	15135	-0.580	Error	Error	6907	10327	0	0	5908	9227	0	0	0	0
1	2	12	""	"iYDR457W"	2290	16600	110	276	289	157	69	219	988	0	0	0	641	609	324	241	562	1871	0	0	0	0	0	0	0	0	0	0	0	0	0	0	0	0	0	0	0	0	0	0.517	0.598	0.553	0.513	2.709	0.424	0.456	0.000	0.000	0.000	0.000	0.000	0.000	0.000	0.000	0.000	0.000	0.000	0.000	0.000	0.000	80	512	607	588	-0.950	Error	Error	207	400	0	0	220	368	0	0	0	0
1	3	12	""	"iYDR461W"	2460	16590	110	5678	4929	2246	71	202	750	91	81	0	4171	3827	1511	240	350	622	90	87	0	0	0	0	0	0	0	0	0	0	0	0	0	0	0	0	0	0	0	1.426	1.354	1.385	1.328	1.798	1.430	0.830	0.000	0.000	0.000	0.000	0.000	0.000	0.000	0.000	0.000	0.000	0.000	0.000	0.000	0.000	80	462	9538	8445	0.512	Error	Error	5607	3931	0	0	4858	3587	0	0	0	0
1	4	12	""	"iYDR465C"	2650	16590	110	5985	5158	2492	80	306	1047	85	82	0	6056	5455	2239	260	508	1076	90	86	0	0	0	0	0	0	0	0	0	0	0	0	0	0	0	0	0	0	0	1.019	0.977	0.992	0.843	1.850	1.014	0.846	0.000	0.000	0.000	0.000	0.000	0.000	0.000	0.000	0.000	0.000	0.000	0.000	0.000	0.000	80	528	11701	10273	0.027	Error	Error	5905	5796	0	0	5078	5195	0	0	0	0
1	5	12	""	"iYDR481C"	2840	16590	110	1761	1553	802	77	224	825	75	56	0	1893	1703	763	249	426	924	77	31	0	0	0	0	0	0	0	0	0	0	0	0	0	0	0	0	0	0	0	1.024	1.015	1.003	0.886	1.690	0.990	0.816	0.000	0.000	0.000	0.000	0.000	0.000	0.000	0.000	0.000	0.000	0.000	0.000	0.000	0.000	80	528	3328	2930	0.035	Error	Error	1684	1644	0	0	1476	1454	0	0	0	0
1	6	12	""	"iYDR485C"	3030	16590	110	2263	1866	956	79	139	293	83	81	0	2314	2064	1007	247	325	398	82	80	0	0	0	0	0	0	0	0	0	0	0	0	0	0	0	0	0	0	0	1.057	0.983	0.984	0.971	1.982	0.966	0.825	0.000	0.000	0.000	0.000	0.000	0.000	0.000	0.000	0.000	0.000	0.000	0.000	0.000	0.000	80	530	4251	3604	0.079	Error	Error	2184	2067	0	0	1787	1817	0	0	0	0
1	7	12	""	"iYDR489W"	3220	16590	110	1055	918	467	77	125	255	78	73	0	1982	1788	901	249	327	401	80	78	0	0	0	0	0	0	0	0	0	0	0	0	0	0	0	0	0	0	0	0.564	0.546	0.555	0.537	2.051	0.503	0.777	0.000	0.000	0.000	0.000	0.000	0.000	0.000	0.000	0.000	0.000	0.000	0.000	0.000	0.000	80	528	2711	2380	-0.825	Error	Error	978	1733	0	0	841	1539	0	0	0	0
1	8	12	""	"itL(CAA)D"	3410	16590	110	2832	2728	1614	75	104	165	87	87	0	5346	5283	3181	252	335	501	85	82	0	0	0	0	0	0	0	0	0	0	0	0	0	0	0	0	0	0	0	0.541	0.527	0.529	0.506	2.465	0.490	0.827	0.000	0.000	0.000	0.000	0.000	0.000	0.000	0.000	0.000	0.000	0.000	0.000	0.000	0.000	80	528	7851	7684	-0.886	Error	Error	2757	5094	0	0	2653	5031	0	0	0	0
1	9	12	""	"iYDR511W"	3600	16590	110	809	718	343	75	96	131	82	81	0	1202	1131	551	254	313	427	81	57	0	0	0	0	0	0	0	0	0	0	0	0	0	0	0	0	0	0	0	0.774	0.733	0.728	0.632	2.010	0.662	0.762	0.000	0.000	0.000	0.000	0.000	0.000	0.000	0.000	0.000	0.000	0.000	0.000	0.000	0.000	80	518	1682	1520	-0.369	Error	Error	734	948	0	0	643	877	0	0	0	0
1	10	12	""	"iYDR516C"	3780	16590	110	4404	3751	1670	77	215	697	90	82	0	4454	4141	1619	250	425	848	92	87	0	0	0	0	0	0	0	0	0	0	0	0	0	0	0	0	0	0	0	1.029	0.944	0.981	0.896	1.703	0.940	0.845	0.000	0.000	0.000	0.000	0.000	0.000	0.000	0.000	0.000	0.000	0.000	0.000	0.000	0.000	80	528	8531	7565	0.042	Error	Error	4327	4204	0	0	3674	3891	0	0	0	0
1	11	12	""	"iYER141W"	3970	16590	100	396	391	174	78	221	716	1	0	0	938	904	391	253	452	887	27	0	0	0	0	0	0	0	0	0	0	0	0	0	0	0	0	0	0	0	0	0.464	0.481	0.488	0.467	2.270	0.386	0.674	0.000	0.000	0.000	0.000	0.000	0.000	0.000	0.000	0.000	0.000	0.000	0.000	0.000	0.000	80	465	1003	964	-1.107	Error	Error	318	685	0	0	313	651	0	0	0	0
1	12	12	""	"iYER145C"	4160	16590	110	2329	2383	1379	73	112	241	90	86	0	2447	2250	1285	249	304	291	82	76	0	0	0	0	0	0	0	0	0	0	0	0	0	0	0	0	0	0	0	1.026	1.154	1.157	1.272	2.780	1.159	0.848	0.000	0.000	0.000	0.000	0.000	0.000	0.000	0.000	0.000	0.000	0.000	0.000	0.000	0.000	80	522	4454	4311	0.038	Error	Error	2256	2198	0	0	2310	2001	0	0	0	0
1	13	12	""	"iYER149C"	4340	16600	110	3912	4048	2197	74	254	868	88	83	0	7632	6851	3832	256	595	1620	78	76	0	0	0	0	0	0	0	0	0	0	0	0	0	0	0	0	0	0	0	0.520	0.603	0.577	0.670	2.420	0.565	0.854	0.000	0.000	0.000	0.000	0.000	0.000	0.000	0.000	0.000	0.000	0.000	0.000	0.000	0.000	80	529	11214	10569	-0.942	Error	Error	3838	7376	0	0	3974	6595	0	0	0	0
1	14	12	""	"iYER163C-0"	4540	16590	110	4791	4255	1971	78	300	991	86	83	0	3561	2969	1453	257	624	1642	75	50	0	0	0	0	0	0	0	0	0	0	0	0	0	0	0	0	0	0	0	1.426	1.540	1.510	1.807	2.477	1.538	0.845	0.000	0.000	0.000	0.000	0.000	0.000	0.000	0.000	0.000	0.000	0.000	0.000	0.000	0.000	80	528	8017	6889	0.512	Error	Error	4713	3304	0	0	4177	2712	0	0	0	0
1	15	12	""	"iYER166W"	4720	16590	110	3757	3584	1961	82	285	885	87	81	0	4465	4432	2494	274	520	1096	82	77	0	0	0	0	0	0	0	0	0	0	0	0	0	0	0	0	0	0	0	0.877	0.842	0.832	0.983	2.528	0.807	0.867	0.000	0.000	0.000	0.000	0.000	0.000	0.000	0.000	0.000	0.000	0.000	0.000	0.000	0.000	80	532	7866	7660	-0.190	Error	Error	3675	4191	0	0	3502	4158	0	0	0	0
1	16	12	""	"iYER170W"	4920	16600	110	1665	1466	721	75	207	714	76	58	0	2117	1812	965	254	467	1042	67	38	0	0	0	0	0	0	0	0	0	0	0	0	0	0	0	0	0	0	0	0.853	0.893	0.883	0.986	2.051	0.789	0.783	0.000	0.000	0.000	0.000	0.000	0.000	0.000	0.000	0.000	0.000	0.000	0.000	0.000	0.000	80	519	3453	2949	-0.229	Error	Error	1590	1863	0	0	1391	1558	0	0	0	0
1	17	12	""	"iYER183C-1"	5100	16590	110	4475	4233	1784	79	234	821	91	88	0	14012	12776	5998	249	811	2826	85	81	0	0	0	0	0	0	0	0	0	0	0	0	0	0	0	0	0	0	0	0.319	0.332	0.339	0.330	1.963	0.307	0.856	0.000	0.000	0.000	0.000	0.000	0.000	0.000	0.000	0.000	0.000	0.000	0.000	0.000	0.000	80	498	18159	16681	-1.647	Error	Error	4396	13763	0	0	4154	12527	0	0	0	0
1	18	12	""	"iYERComega1-0"	5280	16590	110	2748	2795	1408	86	334	953	88	72	0	3918	3609	2095	271	945	2824	62	13	0	0	0	0	0	0	0	0	0	0	0	0	0	0	0	0	0	0	0	0.730	0.812	0.830	0.958	2.449	0.446	0.642	0.000	0.000	0.000	0.000	0.000	0.000	0.000	0.000	0.000	0.000	0.000	0.000	0.000	0.000	80	533	6309	6047	-0.454	Error	Error	2662	3647	0	0	2709	3338	0	0	0	0
1	19	12	""	"iYERWomega2-1"	5480	16590	110	19309	18504	9947	87	729	3120	92	83	0	24112	21620	11783	267	1170	4109	83	81	0	0	0	0	0	0	0	0	0	0	0	0	0	0	0	0	0	0	0	0.806	0.863	0.874	0.928	2.224	0.854	0.882	0.000	0.000	0.000	0.000	0.000	0.000	0.000	0.000	0.000	0.000	0.000	0.000	0.000	0.000	80	557	43067	39770	-0.311	Error	Error	19222	23845	0	0	18417	21353	0	0	0	0
1	20	12	""	"iYFL054C"	5680	16580	110	940	863	439	85	654	3152	0	0	0	1248	1122	579	267	1061	4151	0	0	0	0	0	0	0	0	0	0	0	0	0	0	0	0	0	0	0	0	0	0.872	0.910	0.906	0.735	2.026	0.794	0.747	0.000	0.000	0.000	0.000	0.000	0.000	0.000	0.000	0.000	0.000	0.000	0.000	0.000	0.000	80	531	1836	1633	-0.198	Error	Error	855	981	0	0	778	855	0	0	0	0
1	21	12	""	"iYFL051C-0"	5870	16600	110	9634	9111	4746	83	194	748	93	90	0	20542	18653	10649	261	640	2661	87	78	0	0	0	0	0	0	0	0	0	0	0	0	0	0	0	0	0	0	0	0.471	0.491	0.492	0.529	2.155	0.447	0.861	0.000	0.000	0.000	0.000	0.000	0.000	0.000	0.000	0.000	0.000	0.000	0.000	0.000	0.000	80	529	29832	27420	-1.086	Error	Error	9551	20281	0	0	9028	18392	0	0	0	0
1	22	12	""	"iYFL048C"	6060	16590	110	1140	1019	370	78	172	724	73	1	0	1391	1308	436	257	596	2587	0	0	0	0	0	0	0	0	0	0	0	0	0	0	0	0	0	0	0	0	0	0.937	0.895	0.931	0.946	1.709	0.881	0.815	0.000	0.000	0.000	0.000	0.000	0.000	0.000	0.000	0.000	0.000	0.000	0.000	0.000	0.000	80	560	2196	1992	-0.095	Error	Error	1062	1134	0	0	941	1051	0	0	0	0
1	1	13	""	"iYGL095C"	2080	16770	110	2871	2570	1478	64	120	478	81	77	0	4923	4661	2502	221	315	762	90	82	0	0	0	0	0	0	0	0	0	0	0	0	0	0	0	0	0	0	0	0.597	0.564	0.568	0.509	2.137	0.527	0.809	0.000	0.000	0.000	0.000	0.000	0.000	0.000	0.000	0.000	0.000	0.000	0.000	0.000	0.000	80	550	7509	6946	-0.744	Error	Error	2807	4702	0	0	2506	4440	0	0	0	0
1	2	13	""	"iYGL091C"	2270	16780	100	162	185	125	65	100	284	7	2	0	472	456	220	230	305	571	3	1	0	0	0	0	0	0	0	0	0	0	0	0	0	0	0	0	0	0	0	0.401	0.531	0.450	0.385	2.656	0.383	0.423	0.000	0.000	0.000	0.000	0.000	0.000	0.000	0.000	0.000	0.000	0.000	0.000	0.000	0.000	80	460	339	346	-1.319	Error	Error	97	242	0	0	120	226	0	0	0	0
1	3	13	""	"iYGL087C"	2470	16770	120	2305	1980	1099	68	131	539	81	72	0	2577	2321	1182	234	281	413	83	78	0	0	0	0	0	0	0	0	0	0	0	0	0	0	0	0	0	0	0	0.955	0.916	0.892	0.829	2.291	0.913	0.821	0.000	0.000	0.000	0.000	0.000	0.000	0.000	0.000	0.000	0.000	0.000	0.000	0.000	0.000	120	568	4580	3999	-0.067	Error	Error	2237	2343	0	0	1912	2087	0	0	0	0
1	4	13	""	"iYGL068W"	2640	16780	110	3027	2777	1515	74	194	669	82	80	0	3537	3282	1780	241	406	836	83	73	0	0	0	0	0	0	0	0	0	0	0	0	0	0	0	0	0	0	0	0.896	0.889	0.844	0.829	2.422	0.861	0.831	0.000	0.000	0.000	0.000	0.000	0.000	0.000	0.000	0.000	0.000	0.000	0.000	0.000	0.000	80	484	6249	5744	-0.159	Error	Error	2953	3296	0	0	2703	3041	0	0	0	0
1	5	13	""	"iYGL064C"	2830	16780	100	3055	2813	1437	78	272	775	82	78	0	2450	2165	1095	249	464	877	78	62	0	0	0	0	0	0	0	0	0	0	0	0	0	0	0	0	0	0	0	1.353	1.427	1.345	1.487	2.101	1.403	0.830	0.000	0.000	0.000	0.000	0.000	0.000	0.000	0.000	0.000	0.000	0.000	0.000	0.000	0.000	80	473	5178	4651	0.436	Error	Error	2977	2201	0	0	2735	1916	0	0	0	0
1	6	13	""	"iYGL060W"	3020	16780	100	2306	2080	1078	82	256	658	85	73	0	3654	3103	1818	250	470	820	77	71	0	0	0	0	0	0	0	0	0	0	0	0	0	0	0	0	0	0	0	0.653	0.700	0.731	0.906	2.697	0.633	0.816	0.000	0.000	0.000	0.000	0.000	0.000	0.000	0.000	0.000	0.000	0.000	0.000	0.000	0.000	80	481	5628	4851	-0.614	Error	Error	2224	3404	0	0	1998	2853	0	0	0	0
1	7	13	""	"iYGLWdelta10"	3220	16780	110	4064	3975	2234	80	229	665	83	77	0	3870	3876	2058	258	484	890	86	81	0	0	0	0	0	0	0	0	0	0	0	0	0	0	0	0	0	0	0	1.103	1.077	1.059	1.075	2.019	1.058	0.841	0.000	0.000	0.000	0.000	0.000	0.000	0.000	0.000	0.000	0.000	0.000	0.000	0.000	0.000	80	537	7596	7513	0.141	Error	Error	3984	3612	0	0	3895	3618	0	0	0	0
1	8	13	""	"iYGL042C"	3400	16780	100	2738	2448	1285	74	237	710	80	76	0	4619	4069	2364	256	551	1170	80	68	0	0	0	0	0	0	0	0	0	0	0	0	0	0	0	0	0	0	0	0.611	0.623	0.569	0.673	2.402	0.527	0.793	0.000	0.000	0.000	0.000	0.000	0.000	0.000	0.000	0.000	0.000	0.000	0.000	0.000	0.000	80	471	7027	6187	-0.712	Error	Error	2664	4363	0	0	2374	3813	0	0	0	0
1	9	13	""	"itL(CAA)G2"	3600	16780	110	4263	3707	1608	73	253	770	91	82	0	6462	5503	2730	252	616	1462	80	78	0	0	0	0	0	0	0	0	0	0	0	0	0	0	0	0	0	0	0	0.675	0.692	0.661	0.821	2.781	0.651	0.845	0.000	0.000	0.000	0.000	0.000	0.000	0.000	0.000	0.000	0.000	0.000	0.000	0.000	0.000	80	538	10400	8885	-0.568	Error	Error	4190	6210	0	0	3634	5251	0	0	0	0
1	10	13	""	"iYGL026C"	3790	16790	110	1896	1713	1065	74	262	762	76	58	0	1863	1609	1101	246	523	1199	56	22	0	0	0	0	0	0	0	0	0	0	0	0	0	0	0	0	0	0	0	1.127	1.202	1.164	1.215	2.571	0.917	0.698	0.000	0.000	0.000	0.000	0.000	0.000	0.000	0.000	0.000	0.000	0.000	0.000	0.000	0.000	80	548	3439	3002	0.172	Error	Error	1822	1617	0	0	1639	1363	0	0	0	0
1	11	13	""	"iYGL021W"	3990	16780	100	676	658	354	75	158	379	71	26	0	1576	1423	788	248	348	427	76	72	0	0	0	0	0	0	0	0	0	0	0	0	0	0	0	0	0	0	0	0.453	0.496	0.481	0.465	2.210	0.434	0.762	0.000	0.000	0.000	0.000	0.000	0.000	0.000	0.000	0.000	0.000	0.000	0.000	0.000	0.000	80	498	1929	1758	-1.144	Error	Error	601	1328	0	0	583	1175	0	0	0	0
1	12	13	""	"iYGL017W"	4190	16780	110	1977	1853	1271	76	115	235	78	75	0	2380	2077	1267	244	301	281	77	75	0	0	0	0	0	0	0	0	0	0	0	0	0	0	0	0	0	0	0	0.890	0.969	0.901	0.852	2.802	0.953	0.726	0.000	0.000	0.000	0.000	0.000	0.000	0.000	0.000	0.000	0.000	0.000	0.000	0.000	0.000	80	524	4037	3610	-0.168	Error	Error	1901	2136	0	0	1777	1833	0	0	0	0
1	13	13	""	"iYGR269W"	4360	16780	110	1875	1879	1207	77	135	323	86	77	0	1617	1490	893	254	317	438	77	73	0	0	0	0	0	0	0	0	0	0	0	0	0	0	0	0	0	0	0	1.319	1.458	1.402	1.096	2.190	1.438	0.728	0.000	0.000	0.000	0.000	0.000	0.000	0.000	0.000	0.000	0.000	0.000	0.000	0.000	0.000	80	501	3161	3038	0.400	Error	Error	1798	1363	0	0	1802	1236	0	0	0	0
1	14	13	""	"iYGR273C"	4550	16780	110	1717	1896	1136	75	136	344	90	85	0	4773	4600	2988	261	368	750	78	78	0	0	0	0	0	0	0	0	0	0	0	0	0	0	0	0	0	0	0	0.364	0.420	0.404	0.457	2.989	0.368	0.806	0.000	0.000	0.000	0.000	0.000	0.000	0.000	0.000	0.000	0.000	0.000	0.000	0.000	0.000	80	548	6154	6160	-1.458	Error	Error	1642	4512	0	0	1821	4339	0	0	0	0
1	15	13	""	"iYGR277C"	4750	16780	110	2092	1915	1092	82	160	385	87	75	0	1474	1422	703	274	405	799	75	25	0	0	0	0	0	0	0	0	0	0	0	0	0	0	0	0	0	0	0	1.675	1.597	1.587	1.564	2.829	1.581	0.781	0.000	0.000	0.000	0.000	0.000	0.000	0.000	0.000	0.000	0.000	0.000	0.000	0.000	0.000	80	540	3210	2981	0.744	Error	Error	2010	1200	0	0	1833	1148	0	0	0	0
1	16	13	""	"iYGR292W-0"	4940	16780	110	3097	3120	2111	79	134	253	86	81	0	3524	3365	1977	258	319	340	88	85	0	0	0	0	0	0	0	0	0	0	0	0	0	0	0	0	0	0	0	0.924	0.979	0.935	0.853	2.491	0.995	0.828	0.000	0.000	0.000	0.000	0.000	0.000	0.000	0.000	0.000	0.000	0.000	0.000	0.000	0.000	80	527	6284	6148	-0.114	Error	Error	3018	3266	0	0	3041	3107	0	0	0	0
1	17	13	""	"iYGR295C-1"	5130	16780	110	14312	15322	10633	84	269	1152	86	83	0	17393	17500	11548	268	562	1987	88	82	0	0	0	0	0	0	0	0	0	0	0	0	0	0	0	0	0	0	0	0.831	0.884	0.821	0.733	2.383	0.871	0.867	0.000	0.000	0.000	0.000	0.000	0.000	0.000	0.000	0.000	0.000	0.000	0.000	0.000	0.000	80	528	31353	32470	-0.267	Error	Error	14228	17125	0	0	15238	17232	0	0	0	0
1	18	13	""	"iYHL048W"	5310	16790	110	1936	2062	1514	83	238	1095	68	33	0	3753	4112	3037	269	518	1732	71	50	0	0	0	0	0	0	0	0	0	0	0	0	0	0	0	0	0	0	0	0.532	0.515	0.458	0.492	2.547	0.450	0.808	0.000	0.000	0.000	0.000	0.000	0.000	0.000	0.000	0.000	0.000	0.000	0.000	0.000	0.000	80	528	5337	5822	-0.911	Error	Error	1853	3484	0	0	1979	3843	0	0	0	0
1	19	13	""	"iYHL034C"	5500	16790	110	1120	1218	890	79	156	831	65	17	0	1563	1696	1265	259	365	826	68	32	0	0	0	0	0	0	0	0	0	0	0	0	0	0	0	0	0	0	0	0.798	0.793	0.719	0.715	2.319	0.698	0.799	0.000	0.000	0.000	0.000	0.000	0.000	0.000	0.000	0.000	0.000	0.000	0.000	0.000	0.000	80	549	2345	2576	-0.325	Error	Error	1041	1304	0	0	1139	1437	0	0	0	0
1	20	13	""	"iYHL030W"	5700	16790	110	1306	1141	615	78	111	184	81	81	0	4587	4020	2152	259	350	534	87	81	0	0	0	0	0	0	0	0	0	0	0	0	0	0	0	0	0	0	0	0.284	0.283	0.277	0.261	2.295	0.259	0.838	0.000	0.000	0.000	0.000	0.000	0.000	0.000	0.000	0.000	0.000	0.000	0.000	0.000	0.000	80	558	5556	4824	-1.817	Error	Error	1228	4328	0	0	1063	3761	0	0	0	0
1	21	13	""	"iYHL026C"	5890	16780	110	2265	2171	1307	77	117	198	88	83	0	3029	3001	1693	263	374	619	85	77	0	0	0	0	0	0	0	0	0	0	0	0	0	0	0	0	0	0	0	0.791	0.765	0.742	0.735	2.295	0.739	0.824	0.000	0.000	0.000	0.000	0.000	0.000	0.000	0.000	0.000	0.000	0.000	0.000	0.000	0.000	80	517	4954	4832	-0.338	Error	Error	2188	2766	0	0	2094	2738	0	0	0	0
1	22	13	""	"iYHL011C"	6080	16780	110	1776	1535	874	80	128	220	80	77	0	1934	1712	868	264	336	402	81	73	0	0	0	0	0	0	0	0	0	0	0	0	0	0	0	0	0	0	0	1.016	1.005	0.964	0.870	2.231	0.972	0.827	0.000	0.000	0.000	0.000	0.000	0.000	0.000	0.000	0.000	0.000	0.000	0.000	0.000	0.000	80	570	3366	2903	0.022	Error	Error	1696	1670	0	0	1455	1448	0	0	0	0
1	1	14	""	"iYHLWdelta2"	2090	16970	110	361	401	280	61	65	41	85	82	0	920	1009	648	229	239	110	87	80	0	0	0	0	0	0	0	0	0	0	0	0	0	0	0	0	0	0	0	0.434	0.436	0.404	0.405	2.390	0.376	0.706	0.000	0.000	0.000	0.000	0.000	0.000	0.000	0.000	0.000	0.000	0.000	0.000	0.000	0.000	80	568	991	1120	-1.204	Error	Error	300	691	0	0	340	780	0	0	0	0
1	2	14	""	"iYHL003C"	2270	16970	110	3018	2778	1692	69	122	385	85	81	0	2939	2840	1669	238	297	385	82	80	0	0	0	0	0	0	0	0	0	0	0	0	0	0	0	0	0	0	0	1.092	1.041	1.035	0.893	2.404	1.062	0.767	0.000	0.000	0.000	0.000	0.000	0.000	0.000	0.000	0.000	0.000	0.000	0.000	0.000	0.000	80	510	5650	5311	0.127	Error	Error	2949	2701	0	0	2709	2602	0	0	0	0
1	3	14	""	"iYIL106W"	2470	16970	110	1702	1360	794	76	151	418	77	68	0	3716	3160	1681	254	362	562	82	77	0	0	0	0	0	0	0	0	0	0	0	0	0	0	0	0	0	0	0	0.470	0.442	0.461	0.402	2.377	0.421	0.788	0.000	0.000	0.000	0.000	0.000	0.000	0.000	0.000	0.000	0.000	0.000	0.000	0.000	0.000	80	527	5088	4190	-1.090	Error	Error	1626	3462	0	0	1284	2906	0	0	0	0
1	4	14	""	"iYIL103W-1"	2670	16970	110	2443	2590	1922	76	127	292	83	81	0	2873	2831	1786	246	349	526	81	76	0	0	0	0	0	0	0	0	0	0	0	0	0	0	0	0	0	0	0	0.901	0.973	0.928	0.891	2.958	1.001	0.780	0.000	0.000	0.000	0.000	0.000	0.000	0.000	0.000	0.000	0.000	0.000	0.000	0.000	0.000	80	511	4994	5099	-0.150	Error	Error	2367	2627	0	0	2514	2585	0	0	0	0
1	5	14	""	"iYIL100W"	2850	16970	110	1252	1239	821	78	115	194	83	76	0	1678	1642	1018	252	304	278	82	76	0	0	0	0	0	0	0	0	0	0	0	0	0	0	0	0	0	0	0	0.823	0.835	0.833	0.694	2.532	0.786	0.759	0.000	0.000	0.000	0.000	0.000	0.000	0.000	0.000	0.000	0.000	0.000	0.000	0.000	0.000	80	485	2600	2551	-0.281	Error	Error	1174	1426	0	0	1161	1390	0	0	0	0
1	6	14	""	"iYIL088C"	3040	16970	110	2623	2129	1263	86	162	297	82	76	0	3501	3135	1667	271	373	465	85	80	0	0	0	0	0	0	0	0	0	0	0	0	0	0	0	0	0	0	0	0.785	0.713	0.697	0.640	2.776	0.708	0.826	0.000	0.000	0.000	0.000	0.000	0.000	0.000	0.000	0.000	0.000	0.000	0.000	0.000	0.000	80	521	5767	4907	-0.348	Error	Error	2537	3230	0	0	2043	2864	0	0	0	0
1	7	14	""	"itI(AAU)I2"	3240	16980	110	2056	1692	873	82	161	307	83	80	0	3685	3102	1753	265	413	573	76	73	0	0	0	0	0	0	0	0	0	0	0	0	0	0	0	0	0	0	0	0.577	0.568	0.537	0.590	3.593	0.488	0.713	0.000	0.000	0.000	0.000	0.000	0.000	0.000	0.000	0.000	0.000	0.000	0.000	0.000	0.000	80	526	5394	4447	-0.793	Error	Error	1974	3420	0	0	1610	2837	0	0	0	0
1	8	14	""	"iYIL076W"	3420	16970	110	1758	1599	1024	76	125	227	81	77	0	6701	6123	3555	261	452	1030	82	78	0	0	0	0	0	0	0	0	0	0	0	0	0	0	0	0	0	0	0	0.261	0.260	0.270	0.244	2.323	0.234	0.816	0.000	0.000	0.000	0.000	0.000	0.000	0.000	0.000	0.000	0.000	0.000	0.000	0.000	0.000	80	537	8122	7385	-1.937	Error	Error	1682	6440	0	0	1523	5862	0	0	0	0
1	9	14	""	"iYIL057C"	3620	16970	110	2270	2021	1292	76	127	300	76	71	0	3267	3015	1812	259	426	1010	78	65	0	0	0	0	0	0	0	0	0	0	0	0	0	0	0	0	0	0	0	0.729	0.706	0.651	0.636	2.845	0.651	0.744	0.000	0.000	0.000	0.000	0.000	0.000	0.000	0.000	0.000	0.000	0.000	0.000	0.000	0.000	80	526	5202	4701	-0.455	Error	Error	2194	3008	0	0	1945	2756	0	0	0	0
1	10	14	""	"iYIL054W"	3800	16980	100	1145	960	456	77	136	227	85	76	0	1529	1308	684	262	359	367	78	70	0	0	0	0	0	0	0	0	0	0	0	0	0	0	0	0	0	0	0	0.843	0.844	0.759	0.663	2.867	0.735	0.669	0.000	0.000	0.000	0.000	0.000	0.000	0.000	0.000	0.000	0.000	0.000	0.000	0.000	0.000	80	440	2335	1929	-0.247	Error	Error	1068	1267	0	0	883	1046	0	0	0	0
1	11	14	""	"iYIL050W"	3990	16980	110	1383	1318	706	76	134	234	83	82	0	1356	1279	735	266	353	368	76	71	0	0	0	0	0	0	0	0	0	0	0	0	0	0	0	0	0	0	0	1.199	1.226	1.164	1.097	2.664	1.116	0.710	0.000	0.000	0.000	0.000	0.000	0.000	0.000	0.000	0.000	0.000	0.000	0.000	0.000	0.000	80	514	2397	2255	0.262	Error	Error	1307	1090	0	0	1242	1013	0	0	0	0
1	12	14	""	"iYIL034C"	4180	16980	100	2472	2205	1173	83	173	415	83	78	0	1971	1801	966	267	349	399	78	76	0	0	0	0	0	0	0	0	0	0	0	0	0	0	0	0	0	0	0	1.402	1.383	1.267	1.298	2.463	1.353	0.650	0.000	0.000	0.000	0.000	0.000	0.000	0.000	0.000	0.000	0.000	0.000	0.000	0.000	0.000	80	460	4093	3656	0.487	Error	Error	2389	1704	0	0	2122	1534	0	0	0	0
1	13	14	""	"iYIL030C"	4370	16980	110	1403	1211	533	83	181	411	85	76	0	1530	1363	716	267	361	403	78	71	0	0	0	0	0	0	0	0	0	0	0	0	0	0	0	0	0	0	0	1.045	1.029	0.999	0.928	2.141	0.913	0.716	0.000	0.000	0.000	0.000	0.000	0.000	0.000	0.000	0.000	0.000	0.000	0.000	0.000	0.000	80	515	2583	2224	0.064	Error	Error	1320	1263	0	0	1128	1096	0	0	0	0
1	14	14	""	"iYIL028W"	4560	16980	100	4419	4365	2465	76	257	774	87	83	0	7327	7164	4165	270	585	1413	82	80	0	0	0	0	0	0	0	0	0	0	0	0	0	0	0	0	0	0	0	0.615	0.622	0.592	0.644	2.309	0.562	0.715	0.000	0.000	0.000	0.000	0.000	0.000	0.000	0.000	0.000	0.000	0.000	0.000	0.000	0.000	80	473	11400	11183	-0.700	Error	Error	4343	7057	0	0	4289	6894	0	0	0	0
1	15	14	""	"iYJL006C"	4750	16970	110	807	745	403	79	229	715	51	1	0	1005	933	442	279	553	1339	6	0	0	0	0	0	0	0	0	0	0	0	0	0	0	0	0	0	0	0	0	1.003	1.018	0.997	0.865	2.022	0.515	0.570	0.000	0.000	0.000	0.000	0.000	0.000	0.000	0.000	0.000	0.000	0.000	0.000	0.000	0.000	80	532	1454	1320	0.004	Error	Error	728	726	0	0	666	654	0	0	0	0
1	16	14	""	"iYJL003W"	4940	16980	110	1091	947	467	79	131	196	83	80	0	2555	2119	1171	275	366	400	78	72	0	0	0	0	0	0	0	0	0	0	0	0	0	0	0	0	0	0	0	0.444	0.471	0.452	0.473	2.948	0.402	0.765	0.000	0.000	0.000	0.000	0.000	0.000	0.000	0.000	0.000	0.000	0.000	0.000	0.000	0.000	80	528	3292	2712	-1.172	Error	Error	1012	2280	0	0	868	1844	0	0	0	0
1	17	14	""	"iYJR001W"	5130	16980	110	1645	1424	714	80	145	343	81	78	0	2037	1829	956	280	368	427	82	71	0	0	0	0	0	0	0	0	0	0	0	0	0	0	0	0	0	0	0	0.891	0.868	0.828	0.806	2.107	0.795	0.761	0.000	0.000	0.000	0.000	0.000	0.000	0.000	0.000	0.000	0.000	0.000	0.000	0.000	0.000	80	537	3322	2893	-0.167	Error	Error	1565	1757	0	0	1344	1549	0	0	0	0
1	18	14	""	"iYJR015W"	5330	16980	110	500	437	221	78	126	212	75	48	0	2241	1795	1018	265	359	406	76	72	0	0	0	0	0	0	0	0	0	0	0	0	0	0	0	0	0	0	0	0.214	0.235	0.222	0.221	2.556	0.198	0.679	0.000	0.000	0.000	0.000	0.000	0.000	0.000	0.000	0.000	0.000	0.000	0.000	0.000	0.000	80	530	2398	1889	-2.227	Error	Error	422	1976	0	0	359	1530	0	0	0	0
1	19	14	""	"iYJR021C"	5520	16980	100	536	475	241	79	97	76	80	78	0	794	705	350	265	332	375	71	13	0	0	0	0	0	0	0	0	0	0	0	0	0	0	0	0	0	0	0	0.864	0.900	0.826	0.727	2.452	0.720	0.622	0.000	0.000	0.000	0.000	0.000	0.000	0.000	0.000	0.000	0.000	0.000	0.000	0.000	0.000	80	475	986	836	-0.211	Error	Error	457	529	0	0	396	440	0	0	0	0
1	20	14	""	"iYJR031C"	5720	16980	110	1755	1520	663	74	119	185	96	87	0	1845	1711	684	258	311	239	92	87	0	0	0	0	0	0	0	0	0	0	0	0	0	0	0	0	0	0	0	1.059	0.995	1.037	0.996	1.753	0.975	0.797	0.000	0.000	0.000	0.000	0.000	0.000	0.000	0.000	0.000	0.000	0.000	0.000	0.000	0.000	80	536	3268	2899	0.083	Error	Error	1681	1587	0	0	1446	1453	0	0	0	0
1	21	14	""	"itS(AGA)J"	5910	16970	110	2285	1828	1127	80	136	237	82	76	0	3492	3050	1748	271	364	415	85	76	0	0	0	0	0	0	0	0	0	0	0	0	0	0	0	0	0	0	0	0.685	0.629	0.645	0.590	2.389	0.587	0.777	0.000	0.000	0.000	0.000	0.000	0.000	0.000	0.000	0.000	0.000	0.000	0.000	0.000	0.000	80	495	5426	4527	-0.547	Error	Error	2205	3221	0	0	1748	2779	0	0	0	0
1	22	14	""	"iYJR050W"	6070	16980	100	1581	1695	1083	80	166	404	83	77	0	1663	1571	995	264	368	456	73	66	0	0	0	0	0	0	0	0	0	0	0	0	0	0	0	0	0	0	0	1.073	1.236	1.183	1.081	2.442	1.135	0.783	0.000	0.000	0.000	0.000	0.000	0.000	0.000	0.000	0.000	0.000	0.000	0.000	0.000	0.000	80	458	2900	2922	0.102	Error	Error	1501	1399	0	0	1615	1307	0	0	0	0
1	1	15	""	"iYJR052W"	2090	17170	110	973	856	462	65	74	88	88	82	0	1615	1495	788	247	292	446	80	68	0	0	0	0	0	0	0	0	0	0	0	0	0	0	0	0	0	0	0	0.664	0.634	0.631	0.623	2.440	0.581	0.727	0.000	0.000	0.000	0.000	0.000	0.000	0.000	0.000	0.000	0.000	0.000	0.000	0.000	0.000	80	543	2276	2039	-0.591	Error	Error	908	1368	0	0	791	1248	0	0	0	0
1	2	15	""	"iYJR063W"	2290	17160	120	2973	2826	1978	72	110	229	80	78	0	2819	2433	1623	256	299	261	76	71	0	0	0	0	0	0	0	0	0	0	0	0	0	0	0	0	0	0	0	1.132	1.265	1.238	1.425	2.763	1.259	0.806	0.000	0.000	0.000	0.000	0.000	0.000	0.000	0.000	0.000	0.000	0.000	0.000	0.000	0.000	120	576	5464	4931	0.179	Error	Error	2901	2563	0	0	2754	2177	0	0	0	0
1	3	15	""	"iYJR067C"	2480	17160	120	1612	1325	809	76	111	154	86	76	0	3343	2799	1530	260	313	272	89	81	0	0	0	0	0	0	0	0	0	0	0	0	0	0	0	0	0	0	0	0.498	0.492	0.494	0.440	2.381	0.481	0.856	0.000	0.000	0.000	0.000	0.000	0.000	0.000	0.000	0.000	0.000	0.000	0.000	0.000	0.000	120	535	4619	3788	-1.005	Error	Error	1536	3083	0	0	1249	2539	0	0	0	0
1	4	15	""	"iYJR072C"	2660	17160	120	870	718	445	74	92	129	77	70	0	1114	1027	595	249	275	205	75	71	0	0	0	0	0	0	0	0	0	0	0	0	0	0	0	0	0	0	0	0.920	0.828	0.765	0.580	2.665	0.731	0.733	0.000	0.000	0.000	0.000	0.000	0.000	0.000	0.000	0.000	0.000	0.000	0.000	0.000	0.000	120	538	1661	1422	-0.120	Error	Error	796	865	0	0	644	778	0	0	0	0
1	5	15	""	"itV(AAC)K2"	2860	17150	120	2370	1897	1057	77	124	336	80	76	0	5924	4853	2716	257	348	910	79	74	0	0	0	0	0	0	0	0	0	0	0	0	0	0	0	0	0	0	0	0.405	0.396	0.395	0.406	2.486	0.373	0.850	0.000	0.000	0.000	0.000	0.000	0.000	0.000	0.000	0.000	0.000	0.000	0.000	0.000	0.000	120	532	7960	6416	-1.305	Error	Error	2293	5667	0	0	1820	4596	0	0	0	0
1	6	15	""	"iYKL027W"	3030	17160	120	2785	2626	1679	79	169	352	80	79	0	7347	6065	4239	265	435	983	72	70	0	0	0	0	0	0	0	0	0	0	0	0	0	0	0	0	0	0	0	0.382	0.439	0.418	0.475	3.023	0.382	0.814	0.000	0.000	0.000	0.000	0.000	0.000	0.000	0.000	0.000	0.000	0.000	0.000	0.000	0.000	120	562	9788	8347	-1.388	Error	Error	2706	7082	0	0	2547	5800	0	0	0	0
1	7	15	""	"iYKL023W"	3260	17160	110	794	1061	848	77	173	360	58	50	0	1769	1932	1458	258	407	536	67	55	0	0	0	0	0	0	0	0	0	0	0	0	0	0	0	0	0	0	0	0.475	0.588	0.535	0.488	2.476	0.587	0.814	0.000	0.000	0.000	0.000	0.000	0.000	0.000	0.000	0.000	0.000	0.000	0.000	0.000	0.000	80	471	2228	2658	-1.075	Error	Error	717	1511	0	0	984	1674	0	0	0	0
1	8	15	""	"iYKL007W"	3400	17170	110	1225	982	593	75	90	84	81	77	0	1470	1235	750	256	293	208	73	68	0	0	0	0	0	0	0	0	0	0	0	0	0	0	0	0	0	0	0	0.947	0.926	0.867	0.711	2.728	0.812	0.767	0.000	0.000	0.000	0.000	0.000	0.000	0.000	0.000	0.000	0.000	0.000	0.000	0.000	0.000	80	470	2364	1886	-0.078	Error	Error	1150	1214	0	0	907	979	0	0	0	0
1	9	15	""	"iYKL004W"	3600	17160	110	2223	1886	1174	79	98	88	87	85	0	5545	4435	2877	257	308	228	87	77	0	0	0	0	0	0	0	0	0	0	0	0	0	0	0	0	0	0	0	0.405	0.433	0.419	0.452	2.718	0.387	0.847	0.000	0.000	0.000	0.000	0.000	0.000	0.000	0.000	0.000	0.000	0.000	0.000	0.000	0.000	80	538	7432	5985	-1.302	Error	Error	2144	5288	0	0	1807	4178	0	0	0	0
1	10	15	""	"iCEN11"	3790	17150	110	1476	1371	827	78	97	99	90	83	0	2285	1939	1205	253	304	229	78	70	0	0	0	0	0	0	0	0	0	0	0	0	0	0	0	0	0	0	0	0.688	0.767	0.760	0.753	2.817	0.696	0.846	0.000	0.000	0.000	0.000	0.000	0.000	0.000	0.000	0.000	0.000	0.000	0.000	0.000	0.000	80	501	3430	2979	-0.540	Error	Error	1398	2032	0	0	1293	1686	0	0	0	0
1	11	15	""	"iYKR015C"	3970	17150	110	4935	4422	2706	79	168	581	81	77	0	5511	4949	2728	261	391	808	85	76	0	0	0	0	0	0	0	0	0	0	0	0	0	0	0	0	0	0	0	0.925	0.926	0.925	0.930	2.144	0.924	0.838	0.000	0.000	0.000	0.000	0.000	0.000	0.000	0.000	0.000	0.000	0.000	0.000	0.000	0.000	80	502	10106	9031	-0.113	Error	Error	4856	5250	0	0	4343	4688	0	0	0	0
1	12	15	""	"iYKR019C"	4160	17150	110	2118	1698	977	80	204	635	72	62	0	1863	1559	772	264	411	832	72	43	0	0	0	0	0	0	0	0	0	0	0	0	0	0	0	0	0	0	0	1.275	1.249	1.281	1.246	2.183	1.333	0.784	0.000	0.000	0.000	0.000	0.000	0.000	0.000	0.000	0.000	0.000	0.000	0.000	0.000	0.000	80	502	3637	2913	0.350	Error	Error	2038	1599	0	0	1618	1295	0	0	0	0
1	13	15	""	"iYKR023W"	4340	17150	110	972	805	459	77	131	239	77	66	0	2333	1964	1097	257	332	434	80	72	0	0	0	0	0	0	0	0	0	0	0	0	0	0	0	0	0	0	0	0.431	0.426	0.396	0.332	2.643	0.376	0.746	0.000	0.000	0.000	0.000	0.000	0.000	0.000	0.000	0.000	0.000	0.000	0.000	0.000	0.000	80	504	2971	2435	-1.214	Error	Error	895	2076	0	0	728	1707	0	0	0	0
1	14	15	""	"iYKRCdelta11"	4530	17160	110	3132	2888	1821	72	178	496	86	77	0	3151	3000	1711	256	401	638	81	77	0	0	0	0	0	0	0	0	0	0	0	0	0	0	0	0	0	0	0	1.057	1.026	0.978	0.996	1.950	1.024	0.836	0.000	0.000	0.000	0.000	0.000	0.000	0.000	0.000	0.000	0.000	0.000	0.000	0.000	0.000	80	491	5955	5560	0.080	Error	Error	3060	2895	0	0	2816	2744	0	0	0	0
1	15	15	""	"iYKR042W"	4710	17160	110	1164	1110	563	78	198	454	81	65	0	3549	3042	1568	266	467	762	80	75	0	0	0	0	0	0	0	0	0	0	0	0	0	0	0	0	0	0	0	0.331	0.372	0.366	0.392	1.891	0.371	0.755	0.000	0.000	0.000	0.000	0.000	0.000	0.000	0.000	0.000	0.000	0.000	0.000	0.000	0.000	80	536	4369	3808	-1.596	Error	Error	1086	3283	0	0	1032	2776	0	0	0	0
1	16	15	""	"iYKR046C"	4910	17160	110	986	868	475	79	135	245	76	75	0	1363	1187	676	264	415	650	70	31	0	0	0	0	0	0	0	0	0	0	0	0	0	0	0	0	0	0	0	0.825	0.855	0.774	0.734	2.161	0.747	0.757	0.000	0.000	0.000	0.000	0.000	0.000	0.000	0.000	0.000	0.000	0.000	0.000	0.000	0.000	80	538	2006	1712	-0.277	Error	Error	907	1099	0	0	789	923	0	0	0	0
1	17	15	""	"iYLR167W"	5110	17160	110	713	630	316	78	111	156	77	75	0	1580	1466	790	263	329	300	80	76	0	0	0	0	0	0	0	0	0	0	0	0	0	0	0	0	0	0	0	0.482	0.459	0.439	0.456	1.707	0.392	0.782	0.000	0.000	0.000	0.000	0.000	0.000	0.000	0.000	0.000	0.000	0.000	0.000	0.000	0.000	80	515	1952	1755	-1.052	Error	Error	635	1317	0	0	552	1203	0	0	0	0
1	18	15	""	"iYLR173W"	5290	17160	110	1714	1463	819	81	146	276	80	76	0	1801	1551	900	267	369	460	75	63	0	0	0	0	0	0	0	0	0	0	0	0	0	0	0	0	0	0	0	1.065	1.076	1.072	1.121	1.958	0.952	0.761	0.000	0.000	0.000	0.000	0.000	0.000	0.000	0.000	0.000	0.000	0.000	0.000	0.000	0.000	80	519	3167	2666	0.090	Error	Error	1633	1534	0	0	1382	1284	0	0	0	0
1	19	15	""	"iYLR177W"	5480	17160	110	930	903	574	80	147	275	77	66	0	2535	2390	1535	268	386	474	77	73	0	0	0	0	0	0	0	0	0	0	0	0	0	0	0	0	0	0	0	0.375	0.388	0.381	0.423	2.660	0.348	0.801	0.000	0.000	0.000	0.000	0.000	0.000	0.000	0.000	0.000	0.000	0.000	0.000	0.000	0.000	80	508	3117	2945	-1.415	Error	Error	850	2267	0	0	823	2122	0	0	0	0
1	20	15	""	"iYLR193C"	5660	17160	110	1203	1029	480	79	142	250	83	78	0	1337	1206	667	261	370	432	72	63	0	0	0	0	0	0	0	0	0	0	0	0	0	0	0	0	0	0	0	1.045	1.005	0.863	1.065	2.291	0.779	0.642	0.000	0.000	0.000	0.000	0.000	0.000	0.000	0.000	0.000	0.000	0.000	0.000	0.000	0.000	80	515	2200	1895	0.063	Error	Error	1124	1076	0	0	950	945	0	0	0	0
1	21	15	""	"iYLR198C"	5860	17160	110	609	530	286	79	148	263	70	51	0	2019	1698	1048	271	379	403	72	68	0	0	0	0	0	0	0	0	0	0	0	0	0	0	0	0	0	0	0	0.303	0.316	0.287	0.286	2.215	0.256	0.734	0.000	0.000	0.000	0.000	0.000	0.000	0.000	0.000	0.000	0.000	0.000	0.000	0.000	0.000	80	556	2278	1878	-1.722	Error	Error	530	1748	0	0	451	1427	0	0	0	0
1	22	15	""	"iYLR204W"	6050	17160	110	826	713	373	76	117	202	77	73	0	754	719	394	257	347	440	60	12	0	0	0	0	0	0	0	0	0	0	0	0	0	0	0	0	0	0	0	1.509	1.379	1.246	1.155	2.101	1.060	0.649	0.000	0.000	0.000	0.000	0.000	0.000	0.000	0.000	0.000	0.000	0.000	0.000	0.000	0.000	80	549	1247	1099	0.594	Error	Error	750	497	0	0	637	462	0	0	0	0
1	1	16	""	"iYLR221C"	2060	17340	110	2237	1859	1051	62	132	353	85	76	0	5001	4182	2253	258	450	962	80	75	0	0	0	0	0	0	0	0	0	0	0	0	0	0	0	0	0	0	0	0.459	0.458	0.468	0.452	2.416	0.421	0.811	0.000	0.000	0.000	0.000	0.000	0.000	0.000	0.000	0.000	0.000	0.000	0.000	0.000	0.000	80	509	6918	5721	-1.125	Error	Error	2175	4743	0	0	1797	3924	0	0	0	0
1	2	16	""	"iYLR225C"	2250	17350	110	1874	1714	1172	69	172	426	75	70	0	2527	2258	1557	266	510	1016	67	53	0	0	0	0	0	0	0	0	0	0	0	0	0	0	0	0	0	0	0	0.798	0.826	0.766	0.764	2.736	0.755	0.807	0.000	0.000	0.000	0.000	0.000	0.000	0.000	0.000	0.000	0.000	0.000	0.000	0.000	0.000	80	504	4066	3637	-0.325	Error	Error	1805	2261	0	0	1645	1992	0	0	0	0
1	3	16	""	"iYLRWdelta11"	2430	17350	110	1047	838	464	71	127	270	77	68	0	1654	1485	961	250	343	408	70	66	0	0	0	0	0	0	0	0	0	0	0	0	0	0	0	0	0	0	0	0.695	0.621	0.619	0.606	3.198	0.549	0.774	0.000	0.000	0.000	0.000	0.000	0.000	0.000	0.000	0.000	0.000	0.000	0.000	0.000	0.000	80	535	2380	2002	-0.525	Error	Error	976	1404	0	0	767	1235	0	0	0	0
1	4	16	""	"iYLR244C"	2650	17350	110	725	706	460	72	96	122	77	71	0	1393	1206	729	249	300	289	72	65	0	0	0	0	0	0	0	0	0	0	0	0	0	0	0	0	0	0	0	0.571	0.662	0.657	0.677	2.318	0.604	0.752	0.000	0.000	0.000	0.000	0.000	0.000	0.000	0.000	0.000	0.000	0.000	0.000	0.000	0.000	80	507	1797	1591	-0.809	Error	Error	653	1144	0	0	634	957	0	0	0	0
1	5	16	""	"iYLR247C"	2810	17350	110	4141	4040	2409	73	236	840	83	78	0	2994	2622	1700	257	358	546	75	70	0	0	0	0	0	0	0	0	0	0	0	0	0	0	0	0	0	0	0	1.486	1.677	1.523	1.797	2.588	1.662	0.804	0.000	0.000	0.000	0.000	0.000	0.000	0.000	0.000	0.000	0.000	0.000	0.000	0.000	0.000	80	512	6805	6332	0.572	Error	Error	4068	2737	0	0	3967	2365	0	0	0	0
1	6	16	""	"iYLR252W"	3020	17340	110	1889	1784	1200	77	222	757	73	56	0	3120	2819	1965	254	406	1006	66	61	0	0	0	0	0	0	0	0	0	0	0	0	0	0	0	0	0	0	0	0.632	0.665	0.644	0.676	2.158	0.465	0.569	0.000	0.000	0.000	0.000	0.000	0.000	0.000	0.000	0.000	0.000	0.000	0.000	0.000	0.000	80	537	4678	4272	-0.661	Error	Error	1812	2866	0	0	1707	2565	0	0	0	0
1	7	16	""	"iYML046W"	3210	17340	110	1075	950	547	77	140	258	77	73	0	1824	1621	953	251	360	406	76	68	0	0	0	0	0	0	0	0	0	0	0	0	0	0	0	0	0	0	0	0.634	0.637	0.615	0.561	2.715	0.561	0.766	0.000	0.000	0.000	0.000	0.000	0.000	0.000	0.000	0.000	0.000	0.000	0.000	0.000	0.000	80	544	2571	2243	-0.656	Error	Error	998	1573	0	0	873	1370	0	0	0	0
1	8	16	""	"iYML042W"	3400	17350	110	1306	1045	592	75	124	211	77	76	0	1982	1634	1029	247	341	379	72	71	0	0	0	0	0	0	0	0	0	0	0	0	0	0	0	0	0	0	0	0.710	0.699	0.647	0.573	2.602	0.593	0.783	0.000	0.000	0.000	0.000	0.000	0.000	0.000	0.000	0.000	0.000	0.000	0.000	0.000	0.000	80	528	2966	2357	-0.495	Error	Error	1231	1735	0	0	970	1387	0	0	0	0
1	9	16	""	"iYML038C"	3590	17350	110	262	261	139	74	100	103	68	40	0	552	538	282	250	296	217	65	32	0	0	0	0	0	0	0	0	0	0	0	0	0	0	0	0	0	0	0	0.623	0.649	0.521	0.541	2.938	0.429	0.538	0.000	0.000	0.000	0.000	0.000	0.000	0.000	0.000	0.000	0.000	0.000	0.000	0.000	0.000	80	528	490	475	-0.684	Error	Error	188	302	0	0	187	288	0	0	0	0
1	10	16	""	"iYML021C"	3780	17350	110	3539	3009	1815	79	110	107	86	81	0	3268	2829	1751	253	303	243	81	77	0	0	0	0	0	0	0	0	0	0	0	0	0	0	0	0	0	0	0	1.148	1.137	1.083	1.038	2.529	1.077	0.820	0.000	0.000	0.000	0.000	0.000	0.000	0.000	0.000	0.000	0.000	0.000	0.000	0.000	0.000	80	549	6475	5506	0.199	Error	Error	3460	3015	0	0	2930	2576	0	0	0	0
1	11	16	""	"iYML017W"	3970	17350	110	703	736	544	83	120	208	80	68	0	1844	1960	1471	256	349	456	75	71	0	0	0	0	0	0	0	0	0	0	0	0	0	0	0	0	0	0	0	0.390	0.383	0.339	0.392	2.503	0.303	0.715	0.000	0.000	0.000	0.000	0.000	0.000	0.000	0.000	0.000	0.000	0.000	0.000	0.000	0.000	80	548	2208	2357	-1.357	Error	Error	620	1588	0	0	653	1704	0	0	0	0
1	12	16	""	"iYML013C-A"	4170	17350	110	1964	1548	873	81	129	196	81	73	0	1545	1327	768	264	359	460	73	67	0	0	0	0	0	0	0	0	0	0	0	0	0	0	0	0	0	0	0	1.470	1.380	1.267	0.992	2.735	1.344	0.730	0.000	0.000	0.000	0.000	0.000	0.000	0.000	0.000	0.000	0.000	0.000	0.000	0.000	0.000	80	559	3164	2530	0.556	Error	Error	1883	1281	0	0	1467	1063	0	0	0	0
1	13	16	""	"iYMR002W"	4360	17350	110	968	907	564	76	122	194	77	73	0	1243	1093	700	261	328	381	72	60	0	0	0	0	0	0	0	0	0	0	0	0	0	0	0	0	0	0	0	0.908	0.999	0.943	0.713	3.029	0.842	0.698	0.000	0.000	0.000	0.000	0.000	0.000	0.000	0.000	0.000	0.000	0.000	0.000	0.000	0.000	80	546	1874	1663	-0.139	Error	Error	892	982	0	0	831	832	0	0	0	0
1	14	16	""	"iYMR006C"	4560	17350	120	1756	1414	866	72	112	244	77	75	0	3009	2454	1601	253	318	367	74	70	0	0	0	0	0	0	0	0	0	0	0	0	0	0	0	0	0	0	0	0.611	0.610	0.596	0.617	2.802	0.544	0.832	0.000	0.000	0.000	0.000	0.000	0.000	0.000	0.000	0.000	0.000	0.000	0.000	0.000	0.000	120	623	4440	3543	-0.711	Error	Error	1684	2756	0	0	1342	2201	0	0	0	0
1	15	16	""	"iYMR010W-0"	4760	17350	110	2149	2180	1135	79	106	124	95	91	0	2757	2852	1687	271	329	327	88	83	0	0	0	0	0	0	0	0	0	0	0	0	0	0	0	0	0	0	0	0.833	0.814	0.782	0.824	2.471	0.727	0.821	0.000	0.000	0.000	0.000	0.000	0.000	0.000	0.000	0.000	0.000	0.000	0.000	0.000	0.000	80	514	4556	4682	-0.264	Error	Error	2070	2486	0	0	2101	2581	0	0	0	0
1	16	16	""	"iYMR021C"	4930	17350	110	1440	1331	566	80	129	177	91	87	0	2776	2507	1171	268	374	420	85	83	0	0	0	0	0	0	0	0	0	0	0	0	0	0	0	0	0	0	0	0.542	0.559	0.540	0.561	1.725	0.497	0.845	0.000	0.000	0.000	0.000	0.000	0.000	0.000	0.000	0.000	0.000	0.000	0.000	0.000	0.000	80	500	3868	3490	-0.883	Error	Error	1360	2508	0	0	1251	2239	0	0	0	0
1	17	16	""	"iYMR024W"	5120	17350	110	1503	1340	661	82	154	239	86	81	0	2221	1876	938	277	412	500	80	75	0	0	0	0	0	0	0	0	0	0	0	0	0	0	0	0	0	0	0	0.731	0.787	0.752	0.711	2.766	0.685	0.825	0.000	0.000	0.000	0.000	0.000	0.000	0.000	0.000	0.000	0.000	0.000	0.000	0.000	0.000	80	538	3365	2857	-0.452	Error	Error	1421	1944	0	0	1258	1599	0	0	0	0
1	18	16	""	"iYMR029C"	5310	17360	110	3371	3033	1638	82	179	425	86	85	0	4340	4018	2499	268	427	701	81	75	0	0	0	0	0	0	0	0	0	0	0	0	0	0	0	0	0	0	0	0.808	0.787	0.732	0.875	3.239	0.694	0.818	0.000	0.000	0.000	0.000	0.000	0.000	0.000	0.000	0.000	0.000	0.000	0.000	0.000	0.000	80	539	7361	6701	-0.308	Error	Error	3289	4072	0	0	2951	3750	0	0	0	0
1	19	16	""	"iYMR312W"	5500	17350	110	970	849	403	79	168	409	78	61	0	1726	1508	738	259	424	686	76	56	0	0	0	0	0	0	0	0	0	0	0	0	0	0	0	0	0	0	0	0.607	0.616	0.583	0.617	2.327	0.516	0.778	0.000	0.000	0.000	0.000	0.000	0.000	0.000	0.000	0.000	0.000	0.000	0.000	0.000	0.000	80	547	2358	2019	-0.719	Error	Error	891	1467	0	0	770	1249	0	0	0	0
1	20	16	""	"iYMR316C-A"	5710	17350	120	2247	2076	1412	77	131	222	81	76	0	4226	3812	2491	256	342	339	79	76	0	0	0	0	0	0	0	0	0	0	0	0	0	0	0	0	0	0	0	0.547	0.562	0.549	0.582	3.320	0.526	0.814	0.000	0.000	0.000	0.000	0.000	0.000	0.000	0.000	0.000	0.000	0.000	0.000	0.000	0.000	120	614	6140	5555	-0.871	Error	Error	2170	3970	0	0	1999	3556	0	0	0	0
1	21	16	""	"iYMR319C-1"	5890	17360	110	4133	3699	2176	71	201	642	85	81	0	5214	4613	2928	249	448	1003	77	73	0	0	0	0	0	0	0	0	0	0	0	0	0	0	0	0	0	0	0	0.818	0.831	0.796	0.893	2.861	0.750	0.836	0.000	0.000	0.000	0.000	0.000	0.000	0.000	0.000	0.000	0.000	0.000	0.000	0.000	0.000	80	484	9027	7992	-0.290	Error	Error	4062	4965	0	0	3628	4364	0	0	0	0
1	22	16	""	"iYNL331C"	6060	17350	110	2487	2232	1348	72	263	710	80	67	0	3263	2998	1975	249	546	1177	72	62	0	0	0	0	0	0	0	0	0	0	0	0	0	0	0	0	0	0	0	0.801	0.786	0.729	0.783	2.401	0.688	0.812	0.000	0.000	0.000	0.000	0.000	0.000	0.000	0.000	0.000	0.000	0.000	0.000	0.000	0.000	80	546	5429	4909	-0.320	Error	Error	2415	3014	0	0	2160	2749	0	0	0	0
1	1	17	""	"iYNL327W"	2090	17540	100	607	513	277	60	79	161	76	71	0	1455	1323	821	245	280	288	77	75	0	0	0	0	0	0	0	0	0	0	0	0	0	0	0	0	0	0	0	0.452	0.420	0.427	0.380	2.083	0.324	0.644	0.000	0.000	0.000	0.000	0.000	0.000	0.000	0.000	0.000	0.000	0.000	0.000	0.000	0.000	80	488	1757	1531	-1.145	Error	Error	547	1210	0	0	453	1078	0	0	0	0
1	2	17	""	"iYNL322C"	2270	17540	110	2838	2410	1431	67	155	402	81	80	0	2380	1918	1145	248	341	414	71	70	0	0	0	0	0	0	0	0	0	0	0	0	0	0	0	0	0	0	0	1.300	1.403	1.325	1.519	2.983	1.328	0.738	0.000	0.000	0.000	0.000	0.000	0.000	0.000	0.000	0.000	0.000	0.000	0.000	0.000	0.000	80	526	4903	4013	0.378	Error	Error	2771	2132	0	0	2343	1670	0	0	0	0
1	3	17	""	"iYNL302C"	2470	17540	110	3015	2536	1397	74	284	718	77	73	0	2956	2560	1512	251	464	726	72	71	0	0	0	0	0	0	0	0	0	0	0	0	0	0	0	0	0	0	0	1.087	1.066	1.071	1.226	2.749	1.014	0.793	0.000	0.000	0.000	0.000	0.000	0.000	0.000	0.000	0.000	0.000	0.000	0.000	0.000	0.000	80	554	5646	4771	0.121	Error	Error	2941	2705	0	0	2462	2309	0	0	0	0
1	4	17	""	"iYNL298W"	2660	17550	110	1765	1525	948	74	249	657	71	60	0	6346	5241	3526	265	536	939	70	68	0	0	0	0	0	0	0	0	0	0	0	0	0	0	0	0	0	0	0	0.278	0.292	0.292	0.393	4.200	0.267	0.675	0.000	0.000	0.000	0.000	0.000	0.000	0.000	0.000	0.000	0.000	0.000	0.000	0.000	0.000	80	515	7772	6427	-1.846	Error	Error	1691	6081	0	0	1451	4976	0	0	0	0
1	5	17	""	"iYNL293W"	2840	17540	110	2101	1637	855	79	194	520	78	73	0	2813	2295	1290	266	535	1373	70	41	0	0	0	0	0	0	0	0	0	0	0	0	0	0	0	0	0	0	0	0.794	0.768	0.741	0.764	1.859	0.576	0.694	0.000	0.000	0.000	0.000	0.000	0.000	0.000	0.000	0.000	0.000	0.000	0.000	0.000	0.000	80	551	4569	3587	-0.333	Error	Error	2022	2547	0	0	1558	2029	0	0	0	0
1	6	17	""	"iYNL284C"	3050	17550	110	3087	2648	1461	72	164	351	86	85	0	4802	4217	2598	255	414	626	78	73	0	0	0	0	0	0	0	0	0	0	0	0	0	0	0	0	0	0	0	0.663	0.650	0.603	0.664	2.567	0.590	0.772	0.000	0.000	0.000	0.000	0.000	0.000	0.000	0.000	0.000	0.000	0.000	0.000	0.000	0.000	80	557	7562	6538	-0.593	Error	Error	3015	4547	0	0	2576	3962	0	0	0	0
1	7	17	""	"iYNL281W"	3240	17550	110	1676	1369	856	70	135	260	77	73	0	3620	3036	2084	250	393	579	71	70	0	0	0	0	0	0	0	0	0	0	0	0	0	0	0	0	0	0	0	0.477	0.466	0.448	0.449	1.779	0.410	0.835	0.000	0.000	0.000	0.000	0.000	0.000	0.000	0.000	0.000	0.000	0.000	0.000	0.000	0.000	80	549	4976	4085	-1.069	Error	Error	1606	3370	0	0	1299	2786	0	0	0	0
1	8	17	""	"iYNL276C"	3430	17550	110	1766	1622	1032	72	152	330	78	75	0	2373	2159	1476	242	399	566	71	70	0	0	0	0	0	0	0	0	0	0	0	0	0	0	0	0	0	0	0	0.795	0.809	0.755	0.782	2.966	0.723	0.756	0.000	0.000	0.000	0.000	0.000	0.000	0.000	0.000	0.000	0.000	0.000	0.000	0.000	0.000	80	528	3825	3467	-0.331	Error	Error	1694	2131	0	0	1550	1917	0	0	0	0
1	9	17	""	"iYNR042W"	3610	17540	100	1567	1358	767	78	176	332	78	76	0	1456	1215	729	250	382	453	67	61	0	0	0	0	0	0	0	0	0	0	0	0	0	0	0	0	0	0	0	1.235	1.326	1.147	1.247	2.693	1.123	0.725	0.000	0.000	0.000	0.000	0.000	0.000	0.000	0.000	0.000	0.000	0.000	0.000	0.000	0.000	80	474	2695	2245	0.304	Error	Error	1489	1206	0	0	1280	965	0	0	0	0
1	10	17	""	"iYNR046W"	3800	17550	110	1897	1736	1052	80	168	276	80	78	0	1780	1633	1073	260	348	322	72	70	0	0	0	0	0	0	0	0	0	0	0	0	0	0	0	0	0	0	0	1.195	1.206	1.040	1.152	3.151	1.084	0.781	0.000	0.000	0.000	0.000	0.000	0.000	0.000	0.000	0.000	0.000	0.000	0.000	0.000	0.000	80	515	3337	3029	0.257	Error	Error	1817	1520	0	0	1656	1373	0	0	0	0
1	11	17	""	"iYNR050C"	3980	17540	110	2485	2330	1655	80	203	475	78	72	0	4456	3887	2705	263	463	887	71	71	0	0	0	0	0	0	0	0	0	0	0	0	0	0	0	0	0	0	0	0.574	0.621	0.609	0.758	2.894	0.553	0.759	0.000	0.000	0.000	0.000	0.000	0.000	0.000	0.000	0.000	0.000	0.000	0.000	0.000	0.000	80	545	6598	5874	-0.802	Error	Error	2405	4193	0	0	2250	3624	0	0	0	0
1	12	17	""	"iYNR063W"	4190	17550	110	2285	2038	1236	82	228	545	77	72	0	5138	4281	2668	267	566	1105	71	70	0	0	0	0	0	0	0	0	0	0	0	0	0	0	0	0	0	0	0	0.452	0.487	0.463	0.495	2.404	0.434	0.784	0.000	0.000	0.000	0.000	0.000	0.000	0.000	0.000	0.000	0.000	0.000	0.000	0.000	0.000	80	558	7074	5970	-1.145	Error	Error	2203	4871	0	0	1956	4014	0	0	0	0
1	13	17	""	"iYNR068C"	4380	17550	110	1365	1247	731	78	169	337	78	73	0	2015	1777	1064	269	458	795	72	55	0	0	0	0	0	0	0	0	0	0	0	0	0	0	0	0	0	0	0	0.737	0.775	0.741	0.681	2.262	0.678	0.748	0.000	0.000	0.000	0.000	0.000	0.000	0.000	0.000	0.000	0.000	0.000	0.000	0.000	0.000	80	527	3033	2677	-0.440	Error	Error	1287	1746	0	0	1169	1508	0	0	0	0
1	14	17	""	"iYNR071C"	4560	17550	110	1839	1963	1265	78	162	333	85	78	0	4873	4562	3112	276	448	751	77	75	0	0	0	0	0	0	0	0	0	0	0	0	0	0	0	0	0	0	0	0.383	0.440	0.399	0.440	2.184	0.395	0.798	0.000	0.000	0.000	0.000	0.000	0.000	0.000	0.000	0.000	0.000	0.000	0.000	0.000	0.000	80	522	6358	6171	-1.384	Error	Error	1761	4597	0	0	1885	4286	0	0	0	0
1	15	17	""	"iYOL160W-1"	4760	17550	110	3501	3055	1995	91	234	609	80	72	0	4531	4333	2918	293	521	893	76	75	0	0	0	0	0	0	0	0	0	0	0	0	0	0	0	0	0	0	0	0.805	0.734	0.706	0.681	2.579	0.702	0.734	0.000	0.000	0.000	0.000	0.000	0.000	0.000	0.000	0.000	0.000	0.000	0.000	0.000	0.000	80	544	7648	7004	-0.314	Error	Error	3410	4238	0	0	2964	4040	0	0	0	0
1	16	17	""	"iYOL157C"	4960	17550	120	5306	4717	3079	83	213	575	85	80	0	6552	5848	4248	277	454	757	73	70	0	0	0	0	0	0	0	0	0	0	0	0	0	0	0	0	0	0	0	0.832	0.832	0.756	1.046	3.697	0.765	0.808	0.000	0.000	0.000	0.000	0.000	0.000	0.000	0.000	0.000	0.000	0.000	0.000	0.000	0.000	120	584	11498	10205	-0.265	Error	Error	5223	6275	0	0	4634	5571	0	0	0	0
1	17	17	""	"iYOL155C-1"	5130	17550	110	782	869	702	79	145	349	73	50	0	1698	1905	1830	270	362	452	76	66	0	0	0	0	0	0	0	0	0	0	0	0	0	0	0	0	0	0	0	0.492	0.483	0.445	0.414	2.231	0.442	0.642	0.000	0.000	0.000	0.000	0.000	0.000	0.000	0.000	0.000	0.000	0.000	0.000	0.000	0.000	80	486	2131	2425	-1.022	Error	Error	703	1428	0	0	790	1635	0	0	0	0
1	18	17	""	"iYOL138C"	5330	17550	110	1652	1330	876	76	133	189	76	71	0	1904	1480	1041	252	331	310	70	61	0	0	0	0	0	0	0	0	0	0	0	0	0	0	0	0	0	0	0	0.954	1.021	0.797	0.777	2.785	0.921	0.667	0.000	0.000	0.000	0.000	0.000	0.000	0.000	0.000	0.000	0.000	0.000	0.000	0.000	0.000	80	538	3228	2482	-0.068	Error	Error	1576	1652	0	0	1254	1228	0	0	0	0
1	19	17	""	"iYOL133W"	5520	17550	110	1720	1593	1134	76	125	172	82	76	0	2004	1848	1337	240	301	236	72	71	0	0	0	0	0	0	0	0	0	0	0	0	0	0	0	0	0	0	0	0.932	0.943	0.792	0.804	2.168	0.903	0.746	0.000	0.000	0.000	0.000	0.000	0.000	0.000	0.000	0.000	0.000	0.000	0.000	0.000	0.000	80	507	3408	3125	-0.102	Error	Error	1644	1764	0	0	1517	1608	0	0	0	0
1	20	17	""	"iYOL129W"	5710	17550	110	1167	936	549	80	125	186	78	71	0	2865	2341	1397	264	363	424	76	73	0	0	0	0	0	0	0	0	0	0	0	0	0	0	0	0	0	0	0	0.418	0.412	0.382	0.307	2.105	0.356	0.744	0.000	0.000	0.000	0.000	0.000	0.000	0.000	0.000	0.000	0.000	0.000	0.000	0.000	0.000	80	494	3688	2933	-1.259	Error	Error	1087	2601	0	0	856	2077	0	0	0	0
1	21	17	""	"iYOR161C"	5890	17550	110	3162	2727	1579	80	216	513	83	77	0	4326	3969	2337	269	495	830	77	75	0	0	0	0	0	0	0	0	0	0	0	0	0	0	0	0	0	0	0	0.760	0.715	0.700	0.689	2.314	0.664	0.782	0.000	0.000	0.000	0.000	0.000	0.000	0.000	0.000	0.000	0.000	0.000	0.000	0.000	0.000	80	499	7139	6347	-0.397	Error	Error	3082	4057	0	0	2647	3700	0	0	0	0
1	22	17	""	"iYOR165W"	6080	17550	110	836	684	377	83	196	483	67	12	0	1809	1531	867	270	452	740	73	53	0	0	0	0	0	0	0	0	0	0	0	0	0	0	0	0	0	0	0	0.489	0.477	0.447	0.348	2.345	0.394	0.738	0.000	0.000	0.000	0.000	0.000	0.000	0.000	0.000	0.000	0.000	0.000	0.000	0.000	0.000	80	555	2292	1862	-1.031	Error	Error	753	1539	0	0	601	1261	0	0	0	0
1	1	18	""	"iYOR172W"	2110	17730	110	4025	3590	2225	65	132	354	81	78	0	5258	4396	2574	244	343	572	76	76	0	0	0	0	0	0	0	0	0	0	0	0	0	0	0	0	0	0	0	0.790	0.849	0.798	0.785	2.315	0.801	0.785	0.000	0.000	0.000	0.000	0.000	0.000	0.000	0.000	0.000	0.000	0.000	0.000	0.000	0.000	80	548	8974	7677	-0.340	Error	Error	3960	5014	0	0	3525	4152	0	0	0	0
1	2	18	""	"iYOR183W"	2290	17730	110	832	742	434	82	176	392	71	48	0	1182	1027	598	256	384	605	66	26	0	0	0	0	0	0	0	0	0	0	0	0	0	0	0	0	0	0	0	0.810	0.856	0.763	0.695	2.441	0.656	0.795	0.000	0.000	0.000	0.000	0.000	0.000	0.000	0.000	0.000	0.000	0.000	0.000	0.000	0.000	80	531	1676	1431	-0.304	Error	Error	750	926	0	0	660	771	0	0	0	0
1	3	18	""	"iYOR187W"	2500	17740	110	2225	1879	1295	84	148	330	80	71	0	2385	2014	1273	264	367	886	72	58	0	0	0	0	0	0	0	0	0	0	0	0	0	0	0	0	0	0	0	1.009	1.026	0.941	0.883	2.408	0.972	0.674	0.000	0.000	0.000	0.000	0.000	0.000	0.000	0.000	0.000	0.000	0.000	0.000	0.000	0.000	80	547	4262	3545	0.014	Error	Error	2141	2121	0	0	1795	1750	0	0	0	0
1	4	18	""	"iYOR191W"	2680	17730	110	4670	4350	3160	82	133	149	88	86	0	12963	11152	7552	267	454	1329	77	76	0	0	0	0	0	0	0	0	0	0	0	0	0	0	0	0	0	0	0	0.361	0.392	0.391	0.364	2.255	0.386	0.837	0.000	0.000	0.000	0.000	0.000	0.000	0.000	0.000	0.000	0.000	0.000	0.000	0.000	0.000	80	483	17284	15153	-1.468	Error	Error	4588	12696	0	0	4268	10885	0	0	0	0
1	5	18	""	"iYOR208W"	2880	17740	110	1646	1257	893	74	130	198	77	68	0	4982	3975	2660	265	486	1267	70	67	0	0	0	0	0	0	0	0	0	0	0	0	0	0	0	0	0	0	0	0.333	0.319	0.322	0.297	2.550	0.231	0.585	0.000	0.000	0.000	0.000	0.000	0.000	0.000	0.000	0.000	0.000	0.000	0.000	0.000	0.000	80	552	6289	4893	-1.585	Error	Error	1572	4717	0	0	1183	3710	0	0	0	0
1	6	18	""	"iYOR212W"	3070	17730	110	2413	1781	1296	69	130	209	81	72	0	5710	4473	2898	259	434	584	73	72	0	0	0	0	0	0	0	0	0	0	0	0	0	0	0	0	0	0	0	0.430	0.406	0.421	0.371	2.156	0.392	0.756	0.000	0.000	0.000	0.000	0.000	0.000	0.000	0.000	0.000	0.000	0.000	0.000	0.000	0.000	80	503	7795	5926	-1.218	Error	Error	2344	5451	0	0	1712	4214	0	0	0	0
1	7	18	""	"iYOR216C"	3240	17740	110	1889	1656	961	70	173	361	77	75	0	1700	1532	967	254	415	560	70	62	0	0	0	0	0	0	0	0	0	0	0	0	0	0	0	0	0	0	0	1.258	1.241	1.224	1.052	2.904	0.987	0.611	0.000	0.000	0.000	0.000	0.000	0.000	0.000	0.000	0.000	0.000	0.000	0.000	0.000	0.000	80	474	3265	2864	0.331	Error	Error	1819	1446	0	0	1586	1278	0	0	0	0
1	8	18	""	"iYOR234C"	3420	17740	110	2265	1903	1100	79	217	501	77	75	0	2810	2363	1638	254	415	649	71	63	0	0	0	0	0	0	0	0	0	0	0	0	0	0	0	0	0	0	0	0.855	0.865	0.769	0.717	2.613	0.725	0.724	0.000	0.000	0.000	0.000	0.000	0.000	0.000	0.000	0.000	0.000	0.000	0.000	0.000	0.000	80	526	4742	3933	-0.226	Error	Error	2186	2556	0	0	1824	2109	0	0	0	0
1	9	18	""	"iYOR238W"	3640	17740	110	2682	2201	1785	79	198	426	65	61	0	2240	2028	1586	253	406	625	62	61	0	0	0	0	0	0	0	0	0	0	0	0	0	0	0	0	0	0	0	1.310	1.195	1.055	0.894	3.134	1.162	0.706	0.000	0.000	0.000	0.000	0.000	0.000	0.000	0.000	0.000	0.000	0.000	0.000	0.000	0.000	80	529	4590	3897	0.390	Error	Error	2603	1987	0	0	2122	1775	0	0	0	0
1	10	18	""	"iYOR243C"	3810	17730	110	2146	1704	990	76	283	586	75	66	0	2275	1984	1150	247	474	671	73	70	0	0	0	0	0	0	0	0	0	0	0	0	0	0	0	0	0	0	0	1.021	0.937	0.918	0.730	2.206	0.898	0.770	0.000	0.000	0.000	0.000	0.000	0.000	0.000	0.000	0.000	0.000	0.000	0.000	0.000	0.000	80	450	4098	3365	0.030	Error	Error	2070	2028	0	0	1628	1737	0	0	0	0
1	11	18	""	"iYPL131W"	3990	17740	110	1785	1481	913	74	259	583	71	66	0	2541	2217	1570	254	473	746	66	61	0	0	0	0	0	0	0	0	0	0	0	0	0	0	0	0	0	0	0	0.748	0.717	0.638	0.736	3.585	0.634	0.716	0.000	0.000	0.000	0.000	0.000	0.000	0.000	0.000	0.000	0.000	0.000	0.000	0.000	0.000	80	517	3998	3370	-0.419	Error	Error	1711	2287	0	0	1407	1963	0	0	0	0
1	12	18	""	"iYPL127C"	4190	17740	110	3620	3255	1886	76	319	1000	78	76	0	2901	2533	1706	260	488	870	68	65	0	0	0	0	0	0	0	0	0	0	0	0	0	0	0	0	0	0	0	1.342	1.399	1.211	1.169	3.228	1.330	0.784	0.000	0.000	0.000	0.000	0.000	0.000	0.000	0.000	0.000	0.000	0.000	0.000	0.000	0.000	80	538	6185	5452	0.424	Error	Error	3544	2641	0	0	3179	2273	0	0	0	0
1	13	18	""	"iYPL123C"	4380	17740	110	1401	1185	686	78	289	973	66	6	0	1959	1871	1256	268	458	776	68	57	0	0	0	0	0	0	0	0	0	0	0	0	0	0	0	0	0	0	0	0.782	0.691	0.577	0.617	2.584	0.820	0.635	0.000	0.000	0.000	0.000	0.000	0.000	0.000	0.000	0.000	0.000	0.000	0.000	0.000	0.000	80	528	3014	2710	-0.354	Error	Error	1323	1691	0	0	1107	1603	0	0	0	0
1	14	18	""	"iYPL106C"	4570	17740	110	3539	3109	1807	85	202	495	81	75	0	3211	2622	1509	284	439	684	75	68	0	0	0	0	0	0	0	0	0	0	0	0	0	0	0	0	0	0	0	1.180	1.293	1.307	1.448	3.023	1.233	0.739	0.000	0.000	0.000	0.000	0.000	0.000	0.000	0.000	0.000	0.000	0.000	0.000	0.000	0.000	80	511	6381	5362	0.239	Error	Error	3454	2927	0	0	3024	2338	0	0	0	0
1	15	18	""	"iYPL101W"	4760	17740	110	1697	1536	969	99	279	662	73	63	0	1510	1363	897	308	472	686	61	45	0	0	0	0	0	0	0	0	0	0	0	0	0	0	0	0	0	0	0	1.329	1.362	1.151	1.111	3.164	1.123	0.690	0.000	0.000	0.000	0.000	0.000	0.000	0.000	0.000	0.000	0.000	0.000	0.000	0.000	0.000	80	482	2800	2492	0.411	Error	Error	1598	1202	0	0	1437	1055	0	0	0	0
1	16	18	""	"iYPL095C"	4950	17740	110	2184	1911	1140	92	224	468	82	72	0	3179	2566	1742	296	466	681	70	63	0	0	0	0	0	0	0	0	0	0	0	0	0	0	0	0	0	0	0	0.726	0.801	0.710	0.647	2.865	0.677	0.772	0.000	0.000	0.000	0.000	0.000	0.000	0.000	0.000	0.000	0.000	0.000	0.000	0.000	0.000	80	461	4975	4089	-0.463	Error	Error	2092	2883	0	0	1819	2270	0	0	0	0
1	17	18	""	"iYPL079W"	5150	17740	120	1862	1544	1013	79	164	372	70	67	0	4805	4029	3215	272	413	625	68	61	0	0	0	0	0	0	0	0	0	0	0	0	0	0	0	0	0	0	0	0.393	0.390	0.345	0.405	3.879	0.308	0.750	0.000	0.000	0.000	0.000	0.000	0.000	0.000	0.000	0.000	0.000	0.000	0.000	0.000	0.000	120	574	6316	5222	-1.346	Error	Error	1783	4533	0	0	1465	3757	0	0	0	0
1	18	18	""	"iYPL076W-1"	5330	17740	110	4297	5033	4343	70	136	216	82	76	0	3587	2822	2271	247	310	224	68	63	0	0	0	0	0	0	0	0	0	0	0	0	0	0	0	0	0	0	0	1.266	1.927	1.807	2.057	3.222	2.005	0.793	0.000	0.000	0.000	0.000	0.000	0.000	0.000	0.000	0.000	0.000	0.000	0.000	0.000	0.000	80	488	7567	7538	0.340	Error	Error	4227	3340	0	0	4963	2575	0	0	0	0
1	19	18	""	"iYPL070W"	5530	17740	150	193	463	572	76	141	208	42	29	0	674	1478	1822	250	330	281	53	44	0	0	0	0	0	0	0	0	0	0	0	0	0	0	0	0	0	0	0	0.276	0.315	0.323	0.337	3.118	0.290	0.722	0.000	0.000	0.000	0.000	0.000	0.000	0.000	0.000	0.000	0.000	0.000	0.000	0.000	0.000	156	739	541	1615	-1.858	Error	Error	117	424	0	0	387	1228	0	0	0	0
1	20	18	""	"iYPL057C"	5710	17740	120	1464	1252	842	79	101	88	83	78	0	1076	1024	674	256	302	220	68	59	0	0	0	0	0	0	0	0	0	0	0	0	0	0	0	0	0	0	0	1.689	1.527	1.335	1.323	2.709	1.443	0.690	0.000	0.000	0.000	0.000	0.000	0.000	0.000	0.000	0.000	0.000	0.000	0.000	0.000	0.000	120	485	2205	1941	0.756	Error	Error	1385	820	0	0	1173	768	0	0	0	0
1	21	18	""	"iYPL053C"	5900	17740	120	2234	1942	1389	84	134	274	74	71	0	2172	2125	1717	278	392	679	61	53	0	0	0	0	0	0	0	0	0	0	0	0	0	0	0	0	0	0	0	1.135	1.006	0.883	0.914	3.445	0.859	0.745	0.000	0.000	0.000	0.000	0.000	0.000	0.000	0.000	0.000	0.000	0.000	0.000	0.000	0.000	120	553	4044	3705	0.183	Error	Error	2150	1894	0	0	1858	1847	0	0	0	0
1	22	18	""	"iYPL049C"	6100	17740	120	1707	1440	924	90	112	80	89	81	0	1033	1015	683	290	353	388	64	48	0	0	0	0	0	0	0	0	0	0	0	0	0	0	0	0	0	0	0	2.176	1.862	1.563	1.618	2.768	1.704	0.629	0.000	0.000	0.000	0.000	0.000	0.000	0.000	0.000	0.000	0.000	0.000	0.000	0.000	0.000	120	626	2360	2075	1.122	Error	Error	1617	743	0	0	1350	725	0	0	0	0
1	1	19	""	"YORWdelta19"	2100	17920	110	825	750	528	64	89	109	75	71	0	1787	1592	1027	249	330	549	71	61	0	0	0	0	0	0	0	0	0	0	0	0	0	0	0	0	0	0	0	0.495	0.511	0.462	0.398	2.977	0.405	0.666	0.000	0.000	0.000	0.000	0.000	0.000	0.000	0.000	0.000	0.000	0.000	0.000	0.000	0.000	80	566	2299	2029	-1.015	Error	Error	761	1538	0	0	686	1343	0	0	0	0
1	2	19	""	"TEL15R-5"	2300	17930	120	40071	33470	25146	83	438	1506	88	81	7	31042	24373	17102	268	646	1431	91	80	0	0	0	0	0	0	0	0	0	0	0	0	0	0	0	0	0	0	0	1.299	1.385	1.366	1.204	2.897	1.452	0.833	0.000	0.000	0.000	0.000	0.000	0.000	0.000	0.000	0.000	0.000	0.000	0.000	0.000	0.000	120	613	70762	57492	0.378	Error	Error	39988	30774	0	0	33387	24105	0	0	0	0
1	3	19	""	"YPLCtau1"	2490	17930	110	8933	7724	5260	88	739	2070	73	66	0	13776	12012	8471	282	1115	2722	73	67	0	0	0	0	0	0	0	0	0	0	0	0	0	0	0	0	0	0	0	0.655	0.651	0.648	0.693	3.083	0.624	0.831	0.000	0.000	0.000	0.000	0.000	0.000	0.000	0.000	0.000	0.000	0.000	0.000	0.000	0.000	80	414	22339	19366	-0.609	Error	Error	8845	13494	0	0	7636	11730	0	0	0	0
1	4	19	""	"Q0055"	2670	17920	150	168	204	159	78	221	886	0	0	0	518	543	375	263	601	1902	0	0	0	0	0	0	0	0	0	0	0	0	0	0	0	0	0	0	0	0	0	0.353	0.450	0.370	0.355	2.888	0.459	0.862	0.000	0.000	0.000	0.000	0.000	0.000	0.000	0.000	0.000	0.000	0.000	0.000	0.000	0.000	156	629	345	406	-1.503	Error	Error	90	255	0	0	126	280	0	0	-50	0
1	5	19	""	"Q0075"	2870	17930	110	165	173	100	69	88	72	57	37	0	527	462	271	249	285	146	63	46	0	0	0	0	0	0	0	0	0	0	0	0	0	0	0	0	0	0	0	0.345	0.488	0.369	0.325	2.308	0.298	0.439	0.000	0.000	0.000	0.000	0.000	0.000	0.000	0.000	0.000	0.000	0.000	0.000	0.000	0.000	80	451	374	317	-1.534	Error	Error	96	278	0	0	104	213	0	0	0	0
1	6	19	""	"Q0095"	3050	17930	110	290	271	154	69	99	142	66	26	0	510	474	275	252	293	179	63	30	0	0	0	0	0	0	0	0	0	0	0	0	0	0	0	0	0	0	0	0.857	0.910	0.638	0.505	2.989	0.484	0.496	0.000	0.000	0.000	0.000	0.000	0.000	0.000	0.000	0.000	0.000	0.000	0.000	0.000	0.000	80	475	479	424	-0.223	Error	Error	221	258	0	0	202	222	0	0	0	0
1	7	19	""	"Q0180"	3250	17930	120	6804	6377	4733	71	117	141	89	84	0	1403	1215	930	238	278	156	66	63	0	0	0	0	0	0	0	0	0	0	0	0	0	0	0	0	0	0	0	5.779	6.454	5.861	5.294	2.536	6.512	0.732	0.000	0.000	0.000	0.000	0.000	0.000	0.000	0.000	0.000	0.000	0.000	0.000	0.000	0.000	120	511	7898	7283	2.531	Error	Error	6733	1165	0	0	6306	977	0	0	0	0
1	8	19	""	"IntQ0185A"	3440	17930	120	5869	5441	4702	75	170	298	83	75	0	1598	1378	1053	246	273	155	65	61	0	0	0	0	0	0	0	0	0	0	0	0	0	0	0	0	0	0	0	4.286	4.740	4.417	4.360	2.470	5.174	0.750	0.000	0.000	0.000	0.000	0.000	0.000	0.000	0.000	0.000	0.000	0.000	0.000	0.000	0.000	120	499	7146	6498	2.099	Error	Error	5794	1352	0	0	5366	1132	0	0	0	0
1	9	19	""	"Q0195"	3630	17920	110	362	350	233	73	151	253	57	18	0	527	512	389	241	281	177	57	41	0	0	0	0	0	0	0	0	0	0	0	0	0	0	0	0	0	0	0	1.010	1.022	0.710	0.591	2.856	1.142	0.257	0.000	0.000	0.000	0.000	0.000	0.000	0.000	0.000	0.000	0.000	0.000	0.000	0.000	0.000	80	463	575	548	0.015	Error	Error	289	286	0	0	277	271	0	0	0	0
1	10	19	""	"Q0257"	3840	17920	150	474	419	271	69	192	453	43	0	0	679	602	350	240	373	501	42	3	0	0	0	0	0	0	0	0	0	0	0	0	0	0	0	0	0	0	0	0.923	0.967	0.945	0.842	2.581	0.893	0.606	0.000	0.000	0.000	0.000	0.000	0.000	0.000	0.000	0.000	0.000	0.000	0.000	0.000	0.000	156	622	844	712	-0.116	Error	Error	405	439	0	0	350	362	0	0	0	0
1	11	19	""	"IntQ0280A"	4020	17920	110	1735	1395	906	69	228	527	70	58	0	1856	1611	855	245	395	509	76	68	0	0	0	0	0	0	0	0	0	0	0	0	0	0	0	0	0	0	0	1.034	0.971	1.018	0.805	2.485	1.081	0.811	0.000	0.000	0.000	0.000	0.000	0.000	0.000	0.000	0.000	0.000	0.000	0.000	0.000	0.000	80	414	3277	2692	0.048	Error	Error	1666	1611	0	0	1326	1366	0	0	0	0
1	12	19	""	"Q0295"	4190	17930	110	3122	2717	1912	79	273	622	75	71	0	1428	1213	821	255	401	490	67	55	0	0	0	0	0	0	0	0	0	0	0	0	0	0	0	0	0	0	0	2.594	2.754	2.453	1.881	3.708	2.458	0.636	0.000	0.000	0.000	0.000	0.000	0.000	0.000	0.000	0.000	0.000	0.000	0.000	0.000	0.000	80	465	4216	3596	1.375	Error	Error	3043	1173	0	0	2638	958	0	0	0	0
1	13	19	""	"iYHR216W"	4390	17930	110	7337	7492	5817	86	219	576	83	78	0	10736	10260	7647	261	457	1055	76	76	0	0	0	0	0	0	0	0	0	0	0	0	0	0	0	0	0	0	0	0.692	0.741	0.691	0.689	2.529	0.722	0.860	0.000	0.000	0.000	0.000	0.000	0.000	0.000	0.000	0.000	0.000	0.000	0.000	0.000	0.000	80	472	17726	17405	-0.531	Error	Error	7251	10475	0	0	7406	9999	0	0	0	0
1	14	19	""	"TEL9L"	4580	17930	120	20270	18599	14120	90	598	2036	79	71	0	19152	16473	13069	288	1026	2959	73	60	0	0	0	0	0	0	0	0	0	0	0	0	0	0	0	0	0	0	0	1.070	1.144	1.073	1.243	3.125	1.091	0.836	0.000	0.000	0.000	0.000	0.000	0.000	0.000	0.000	0.000	0.000	0.000	0.000	0.000	0.000	120	495	39044	34694	0.097	Error	Error	20180	18864	0	0	18509	16185	0	0	0	0
1	15	19	""	"YILCdelta3"	4780	17920	150	1717	6848	8330	100	591	1936	48	43	0	1787	7321	8816	302	943	2726	46	39	0	0	0	0	0	0	0	0	0	0	0	0	0	0	0	0	0	0	0	1.089	0.961	0.839	0.891	4.175	0.891	0.736	0.000	0.000	0.000	0.000	0.000	0.000	0.000	0.000	0.000	0.000	0.000	0.000	0.000	0.000	156	548	3102	13767	0.123	Error	Error	1617	1485	0	0	6748	7019	0	0	0	0
1	16	19	""	"YJRWdelta14"	4970	17920	150	425	491	400	89	202	419	45	15	0	997	1011	792	288	443	742	48	18	0	0	0	0	0	0	0	0	0	0	0	0	0	0	0	0	0	0	0	0.474	0.556	0.520	0.454	2.308	0.434	0.745	0.000	0.000	0.000	0.000	0.000	0.000	0.000	0.000	0.000	0.000	0.000	0.000	0.000	0.000	156	540	1045	1125	-1.077	Error	Error	336	709	0	0	402	723	0	0	0	0
1	17	19	""	"SNR64"	5140	17930	110	901	742	496	84	123	182	73	65	0	1047	903	609	268	313	236	62	62	0	0	0	0	0	0	0	0	0	0	0	0	0	0	0	0	0	0	0	1.049	1.036	0.816	0.751	3.274	0.912	0.582	0.000	0.000	0.000	0.000	0.000	0.000	0.000	0.000	0.000	0.000	0.000	0.000	0.000	0.000	80	415	1596	1293	0.069	Error	Error	817	779	0	0	658	635	0	0	0	0
1	18	19	""	"YKL162C-A"	5330	17940	110	722	998	1055	77	156	279	55	51	0	705	1390	1475	257	345	365	51	46	0	0	0	0	0	0	0	0	0	0	0	0	0	0	0	0	0	0	0	1.440	0.813	0.588	0.543	3.525	0.733	0.659	0.000	0.000	0.000	0.000	0.000	0.000	0.000	0.000	0.000	0.000	0.000	0.000	0.000	0.000	80	490	1093	2054	0.526	Error	Error	645	448	0	0	921	1133	0	0	0	0
1	19	19	""	"itQ(UUG)L"	5520	17940	110	929	854	589	77	144	253	71	60	0	1860	1593	1130	255	370	450	63	61	0	0	0	0	0	0	0	0	0	0	0	0	0	0	0	0	0	0	0	0.531	0.581	0.554	0.599	2.838	0.531	0.698	0.000	0.000	0.000	0.000	0.000	0.000	0.000	0.000	0.000	0.000	0.000	0.000	0.000	0.000	80	471	2457	2115	-0.914	Error	Error	852	1605	0	0	777	1338	0	0	0	0
1	20	19	""	"RDN25-1B"	5730	17930	120	7291	6382	4736	88	159	278	83	80	0	28724	22572	16976	271	537	1063	85	75	0	0	0	0	0	0	0	0	0	0	0	0	0	0	0	0	0	0	0	0.253	0.282	0.277	0.282	3.129	0.267	0.869	0.000	0.000	0.000	0.000	0.000	0.000	0.000	0.000	0.000	0.000	0.000	0.000	0.000	0.000	120	524	35656	28595	-1.982	Error	Error	7203	28453	0	0	6294	22301	0	0	0	0
1	21	19	""	"RDN37-1"	5910	17930	110	5679	4706	2821	89	297	708	82	80	0	15372	12912	8027	294	1025	2440	76	76	0	0	0	0	0	0	0	0	0	0	0	0	0	0	0	0	0	0	0	0.371	0.366	0.354	0.337	2.928	0.330	0.832	0.000	0.000	0.000	0.000	0.000	0.000	0.000	0.000	0.000	0.000	0.000	0.000	0.000	0.000	80	447	20668	17235	-1.432	Error	Error	5590	15078	0	0	4617	12618	0	0	0	0
1	22	19	""	"iYLR162W-A"	6100	17930	110	7584	6615	3798	101	450	1183	83	78	0	25714	22443	14014	330	1609	4025	80	76	0	0	0	0	0	0	0	0	0	0	0	0	0	0	0	0	0	0	0	0.295	0.295	0.298	0.311	1.773	0.266	0.830	0.000	0.000	0.000	0.000	0.000	0.000	0.000	0.000	0.000	0.000	0.000	0.000	0.000	0.000	80	510	32867	28627	-1.762	Error	Error	7483	25384	0	0	6514	22113	0	0	0	0
1	1	20	""	"tI(UAU)L"	2100	18120	100	416	384	214	60	80	76	78	75	0	862	767	487	243	311	524	58	13	0	0	0	0	0	0	0	0	0	0	0	0	0	0	0	0	0	0	0	0.575	0.618	0.503	0.519	2.338	0.329	0.458	0.000	0.000	0.000	0.000	0.000	0.000	0.000	0.000	0.000	0.000	0.000	0.000	0.000	0.000	80	533	975	848	-0.798	Error	Error	356	619	0	0	324	524	0	0	0	0
1	2	20	""	"YLRWdelta17"	2300	18130	110	1440	1230	867	65	124	267	73	68	0	2543	1940	1531	249	355	591	62	58	0	0	0	0	0	0	0	0	0	0	0	0	0	0	0	0	0	0	0	0.599	0.689	0.628	0.538	3.883	0.598	0.752	0.000	0.000	0.000	0.000	0.000	0.000	0.000	0.000	0.000	0.000	0.000	0.000	0.000	0.000	80	520	3669	2856	-0.738	Error	Error	1375	2294	0	0	1165	1691	0	0	0	0
1	3	20	"EMPTY"	"EMPTY"	2480	18110	150	69	73	32	63	379	1456	0	0	0	231	238	68	239	623	1871	0	0	0	0	0	0	0	0	0	0	0	0	0	0	0	0	0	0	0	0	0	-0.750	-10.000	0.345	0.441	4.590	0.602	0.857	0.000	0.000	0.000	0.000	0.000	0.000	0.000	0.000	0.000	0.000	0.000	0.000	0.000	0.000	156	759	-2	9	Error	Error	Error	6	-8	0	0	10	-1	0	0	-75	0
1	4	20	"EMPTY"	"EMPTY"	2670	18110	150	65	66	26	63	135	751	0	0	0	223	226	65	229	365	1291	0	0	0	0	0	0	0	0	0	0	0	0	0	0	0	0	0	0	0	0	0	-0.333	-1.000	0.400	0.442	3.838	0.001	0.000	0.000	0.000	0.000	0.000	0.000	0.000	0.000	0.000	0.000	0.000	0.000	0.000	0.000	0.000	156	713	-4	0	Error	Error	Error	2	-6	0	0	3	-3	0	0	-75	0
1	5	20	"EMPTY"	"EMPTY"	2860	18110	150	60	63	22	64	72	43	3	0	0	230	229	65	231	249	104	5	0	0	0	0	0	0	0	0	0	0	0	0	0	0	0	0	0	0	0	0	4.000	0.500	0.402	0.364	3.918	0.058	0.016	0.000	0.000	0.000	0.000	0.000	0.000	0.000	0.000	0.000	0.000	0.000	0.000	0.000	0.000	156	738	-5	-3	2.000	Error	Error	-4	-1	0	0	-1	-2	0	0	-75	0
1	6	20	"EMPTY"	"EMPTY"	3050	18110	150	63	64	19	65	76	52	1	0	0	227	235	61	236	259	116	3	0	0	0	0	0	0	0	0	0	0	0	0	0	0	0	0	0	0	0	0	0.222	1.000	0.326	0.355	3.000	0.124	0.098	0.000	0.000	0.000	0.000	0.000	0.000	0.000	0.000	0.000	0.000	0.000	0.000	0.000	0.000	156	743	-11	-2	-2.170	Error	Error	-2	-9	0	0	-1	-1	0	0	-75	0
1	7	20	"EMPTY"	"EMPTY"	3240	18110	150	64	65	24	65	84	83	0	0	0	240	239	68	231	253	117	5	0	0	0	0	0	0	0	0	0	0	0	0	0	0	0	0	0	0	0	0	-0.111	0.000	0.356	0.317	3.189	0.009	0.000	0.000	0.000	0.000	0.000	0.000	0.000	0.000	0.000	0.000	0.000	0.000	0.000	0.000	0.000	156	720	8	8	Error	Error	Error	-1	9	0	0	0	8	0	0	-75	0
1	8	20	"EMPTY"	"EMPTY"	3430	18110	150	63	65	24	67	108	184	0	0	0	219	231	70	235	245	101	5	0	0	0	0	0	0	0	0	0	0	0	0	0	0	0	0	0	0	0	0	0.250	0.500	0.293	0.295	3.468	0.027	0.004	0.000	0.000	0.000	0.000	0.000	0.000	0.000	0.000	0.000	0.000	0.000	0.000	0.000	0.000	156	715	-20	-6	-2.000	Error	Error	-4	-16	0	0	-2	-4	0	0	-75	0
1	9	20	"EMPTY"	"EMPTY"	3620	18110	150	67	69	27	67	106	185	0	0	0	228	234	72	240	253	109	7	0	0	0	0	0	0	0	0	0	0	0	0	0	0	0	0	0	0	0	0	0.000	-0.333	0.335	0.445	3.929	0.214	0.149	0.000	0.000	0.000	0.000	0.000	0.000	0.000	0.000	0.000	0.000	0.000	0.000	0.000	0.000	156	755	-12	-4	Error	Error	Error	0	-12	0	0	2	-6	0	0	-75	0
1	10	20	"EMPTY"	"EMPTY"	3810	18110	150	64	68	26	66	76	58	1	0	0	233	238	68	232	248	103	7	1	0	0	0	0	0	0	0	0	0	0	0	0	0	0	0	0	0	0	0	-2.000	0.333	0.500	0.479	3.505	0.003	0.000	0.000	0.000	0.000	0.000	0.000	0.000	0.000	0.000	0.000	0.000	0.000	0.000	0.000	0.000	156	736	-1	8	Error	Error	Error	-2	1	0	0	2	6	0	0	-75	0
1	11	20	"EMPTY"	"EMPTY"	4000	18110	150	70	69	26	68	133	342	0	0	0	245	251	80	237	300	326	0	0	0	0	0	0	0	0	0	0	0	0	0	0	0	0	0	0	0	0	0	0.250	0.071	0.605	0.528	6.362	0.970	0.619	0.000	0.000	0.000	0.000	0.000	0.000	0.000	0.000	0.000	0.000	0.000	0.000	0.000	0.000	156	722	10	15	-2.000	Error	Error	2	8	0	0	1	14	0	0	-75	0
1	12	20	"EMPTY"	"EMPTY"	4190	18110	150	72	75	27	75	169	450	0	0	0	238	243	77	242	319	357	0	0	0	0	0	0	0	0	0	0	0	0	0	0	0	0	0	0	0	0	0	0.750	0.000	0.357	0.401	4.021	0.599	0.051	0.000	0.000	0.000	0.000	0.000	0.000	0.000	0.000	0.000	0.000	0.000	0.000	0.000	0.000	156	756	-7	1	-0.415	Error	Error	-3	-4	0	0	0	1	0	0	-75	0
1	13	20	"EMPTY"	"EMPTY"	4380	18110	150	72	73	25	73	146	434	0	0	0	248	250	66	244	348	787	0	0	0	0	0	0	0	0	0	0	0	0	0	0	0	0	0	0	0	0	0	-0.250	0.000	0.551	0.465	4.061	0.538	0.461	0.000	0.000	0.000	0.000	0.000	0.000	0.000	0.000	0.000	0.000	0.000	0.000	0.000	0.000	156	751	3	6	Error	Error	Error	-1	4	0	0	0	6	0	0	-75	0
1	14	20	"EMPTY"	"EMPTY"	4570	18110	150	73	79	31	77	353	1630	0	0	0	248	249	65	262	648	2355	0	0	0	0	0	0	0	0	0	0	0	0	0	0	0	0	0	0	0	0	0	0.286	-0.154	0.339	0.451	4.644	76.948	0.000	0.000	0.000	0.000	0.000	0.000	0.000	0.000	0.000	0.000	0.000	0.000	0.000	0.000	0.000	156	717	-18	-11	-1.807	Error	Error	-4	-14	0	0	2	-13	0	0	-75	0
1	15	20	"EMPTY"	"EMPTY"	4760	18110	150	78	84	34	82	362	1658	0	0	0	254	265	86	262	631	2323	0	0	0	0	0	0	0	0	0	0	0	0	0	0	0	0	0	0	0	0	0	0.500	0.667	0.481	0.435	3.859	0.018	0.002	0.000	0.000	0.000	0.000	0.000	0.000	0.000	0.000	0.000	0.000	0.000	0.000	0.000	0.000	156	693	-12	5	-1.000	Error	Error	-4	-8	0	0	2	3	0	0	-75	0
1	16	20	"EMPTY"	"EMPTY"	4950	18110	150	82	84	28	82	111	201	0	0	0	249	253	77	255	309	475	0	0	0	0	0	0	0	0	0	0	0	0	0	0	0	0	0	0	0	0	0	0.000	-1.000	0.293	0.330	3.995	0.018	0.002	0.000	0.000	0.000	0.000	0.000	0.000	0.000	0.000	0.000	0.000	0.000	0.000	0.000	0.000	156	678	-6	0	Error	Error	Error	0	-6	0	0	2	-2	0	0	-75	0
1	17	20	"EMPTY"	"EMPTY"	5140	18120	150	84	85	27	82	101	133	0	0	0	238	253	84	255	277	156	4	0	0	0	0	0	0	0	0	0	0	0	0	0	0	0	0	0	0	0	0	-0.118	-1.500	0.424	0.430	4.727	0.016	0.001	0.000	0.000	0.000	0.000	0.000	0.000	0.000	0.000	0.000	0.000	0.000	0.000	0.000	0.000	156	743	-15	1	Error	Error	Error	2	-17	0	0	3	-2	0	0	-75	0
1	18	20	"EMPTY"	"EMPTY"	5330	18120	150	70	73	31	79	111	181	0	0	0	240	244	69	245	291	258	0	0	0	0	0	0	0	0	0	0	0	0	0	0	0	0	0	0	0	0	0	1.800	6.000	0.546	0.575	4.412	38.769	0.000	0.000	0.000	0.000	0.000	0.000	0.000	0.000	0.000	0.000	0.000	0.000	0.000	0.000	0.000	156	763	-14	-7	0.848	Error	Error	-9	-5	0	0	-6	-1	0	0	-75	0
1	19	20	"EMPTY"	"EMPTY"	5520	18120	150	70	71	28	73	101	148	0	0	0	237	251	87	244	298	294	1	0	0	0	0	0	0	0	0	0	0	0	0	0	0	0	0	0	0	0	0	0.429	-0.286	0.340	0.344	3.552	0.012	0.008	0.000	0.000	0.000	0.000	0.000	0.000	0.000	0.000	0.000	0.000	0.000	0.000	0.000	0.000	156	765	-10	5	-1.222	Error	Error	-3	-7	0	0	-2	7	0	0	-75	0
1	20	20	"EMPTY"	"EMPTY"	5710	18120	150	70	72	30	76	108	188	0	0	0	239	250	75	243	360	737	0	0	0	0	0	0	0	0	0	0	0	0	0	0	0	0	0	0	0	0	0	1.500	-0.571	0.576	0.589	3.903	0.003	0.000	0.000	0.000	0.000	0.000	0.000	0.000	0.000	0.000	0.000	0.000	0.000	0.000	0.000	0.000	156	755	-10	3	0.585	Error	Error	-6	-4	0	0	-4	7	0	0	-75	0
1	21	20	"EMPTY"	"EMPTY"	5900	18120	150	75	79	30	76	173	514	0	0	0	247	248	79	242	560	1754	0	0	0	0	0	0	0	0	0	0	0	0	0	0	0	0	0	0	0	0	0	-0.200	0.500	0.360	0.412	4.400	5.109	0.025	0.000	0.000	0.000	0.000	0.000	0.000	0.000	0.000	0.000	0.000	0.000	0.000	0.000	0.000	156	760	4	9	Error	Error	Error	-1	5	0	0	3	6	0	0	-75	0
1	22	20	"EMPTY"	"EMPTY"	6090	18120	150	72	73	24	80	229	819	0	0	0	245	252	68	264	769	2815	0	0	0	0	0	0	0	0	0	0	0	0	0	0	0	0	0	0	0	0	0	0.421	0.583	0.354	0.366	3.421	1.025	0.259	0.000	0.000	0.000	0.000	0.000	0.000	0.000	0.000	0.000	0.000	0.000	0.000	0.000	0.000	156	963	-27	-19	-1.248	Error	Error	-8	-19	0	0	-7	-12	0	0	-75	0
2	1	1	"VPS8"	"YAL002W"	6530	14440	150	564	541	262	91	96	41	85	85	0	944	880	381	276	287	93	83	78	0	0	0	0	0	0	0	0	0	0	0	0	0	0	0	0	0	0	0	0.708	0.745	0.713	0.739	2.165	0.673	0.726	0.000	0.000	0.000	0.000	0.000	0.000	0.000	0.000	0.000	0.000	0.000	0.000	0.000	0.000	156	764	1141	1054	-0.498	Error	Error	473	668	0	0	450	604	0	0	0	0
2	2	1	"MTW1"	"YAL034W-A"	6720	14440	150	9469	8397	5027	93	100	45	91	91	0	21075	21012	12821	279	291	94	89	87	0	0	0	0	0	0	0	0	0	0	0	0	0	0	0	0	0	0	0	0.451	0.401	0.397	0.433	2.342	0.381	0.899	0.000	0.000	0.000	0.000	0.000	0.000	0.000	0.000	0.000	0.000	0.000	0.000	0.000	0.000	156	722	30172	29037	-1.149	Error	Error	9376	20796	0	0	8304	20733	0	0	0	0
2	3	1	""	"YAL064W-B"	6910	14440	150	16095	14110	7312	103	115	61	94	92	0	15849	13353	7457	292	305	114	88	86	0	0	0	0	0	0	0	0	0	0	0	0	0	0	0	0	0	0	0	1.028	1.072	1.070	1.190	2.261	1.023	0.870	0.000	0.000	0.000	0.000	0.000	0.000	0.000	0.000	0.000	0.000	0.000	0.000	0.000	0.000	156	735	31549	27068	0.040	Error	Error	15992	15557	0	0	14007	13061	0	0	0	0
2	4	1	""	"YAL004W"	7100	14440	150	11429	9986	5144	102	114	71	94	92	0	10907	9625	4936	290	303	116	88	87	0	0	0	0	0	0	0	0	0	0	0	0	0	0	0	0	0	0	0	1.067	1.059	1.073	1.063	1.995	1.056	0.898	0.000	0.000	0.000	0.000	0.000	0.000	0.000	0.000	0.000	0.000	0.000	0.000	0.000	0.000	156	707	21944	19219	0.093	Error	Error	11327	10617	0	0	9884	9335	0	0	0	0
2	5	1	"FUN12"	"YAL035W"	7280	14440	150	90	94	34	91	95	37	12	5	0	268	284	84	275	286	95	16	3	0	0	0	0	0	0	0	0	0	0	0	0	0	0	0	0	0	0	0	0.143	0.333	0.455	0.440	4.300	0.022	0.002	0.000	0.000	0.000	0.000	0.000	0.000	0.000	0.000	0.000	0.000	0.000	0.000	0.000	0.000	156	709	-8	12	-2.807	Error	Error	-1	-7	0	0	3	9	0	0	-100	0
2	6	1	""	"YAL066W"	7470	14440	150	90	94	30	90	99	97	0	0	0	275	281	84	269	284	114	11	1	0	0	0	0	0	0	0	0	0	0	0	0	0	0	0	0	0	0	0	0.000	0.333	0.359	0.358	4.053	0.056	0.014	0.000	0.000	0.000	0.000	0.000	0.000	0.000	0.000	0.000	0.000	0.000	0.000	0.000	0.000	156	806	6	16	Error	Error	Error	0	6	0	0	4	12	0	0	-100	0
2	7	1	"ERP2"	"YAL007C"	7670	14440	110	280	292	77	94	100	54	98	88	0	585	612	149	264	281	137	95	72	0	0	0	0	0	0	0	0	0	0	0	0	0	0	0	0	0	0	0	0.579	0.569	0.538	0.585	1.935	0.393	0.574	0.000	0.000	0.000	0.000	0.000	0.000	0.000	0.000	0.000	0.000	0.000	0.000	0.000	0.000	80	542	507	546	-0.787	Error	Error	186	321	0	0	198	348	0	0	-100	0
2	8	1	""	"YAL037W"	7910	14470	150	95	99	34	99	105	53	7	0	0	260	267	73	268	286	130	6	0	0	0	0	0	0	0	0	0	0	0	0	0	0	0	0	0	0	0	0	0.500	0.000	0.620	0.622	3.472	0.024	0.002	0.000	0.000	0.000	0.000	0.000	0.000	0.000	0.000	0.000	0.000	0.000	0.000	0.000	0.000	156	795	-12	-1	-1.000	Error	Error	-4	-8	0	0	0	-1	0	0	-100	0
2	9	1	""	"YAL068C"	8100	14470	150	97	106	60	99	103	44	15	3	0	288	295	93	270	286	108	14	3	0	0	0	0	0	0	0	0	0	0	0	0	0	0	0	0	0	0	0	-0.111	0.280	0.595	0.608	4.474	0.047	0.012	0.000	0.000	0.000	0.000	0.000	0.000	0.000	0.000	0.000	0.000	0.000	0.000	0.000	0.000	156	653	16	32	Error	Error	Error	-2	18	0	0	7	25	0	0	-100	0
2	10	1	"spo7"	"YAL009W"	8290	14470	150	106	107	41	101	108	55	14	1	0	282	298	95	276	300	200	3	0	0	0	0	0	0	0	0	0	0	0	0	0	0	0	0	0	0	0	0	0.833	0.273	0.500	0.544	3.581	0.061	0.012	0.000	0.000	0.000	0.000	0.000	0.000	0.000	0.000	0.000	0.000	0.000	0.000	0.000	0.000	156	685	11	28	-0.263	Error	Error	5	6	0	0	6	22	0	0	-100	0
2	11	1	"cyc3"	"YAL039C"	8480	14470	150	101	105	34	97	106	46	12	1	0	297	297	84	275	290	147	8	0	0	0	0	0	0	0	0	0	0	0	0	0	0	0	0	0	0	0	0	0.182	0.364	0.378	0.368	4.469	0.083	0.012	0.000	0.000	0.000	0.000	0.000	0.000	0.000	0.000	0.000	0.000	0.000	0.000	0.000	0.000	156	663	26	30	-2.459	Error	Error	4	22	0	0	8	22	0	0	-100	0
2	12	1	"ERP1"	"YAR002C-A"	8640	14460	140	285	288	98	97	104	40	92	87	0	624	629	227	275	283	84	89	81	0	0	0	0	0	0	0	0	0	0	0	0	0	0	0	0	0	0	0	0.539	0.540	0.531	0.565	2.296	0.374	0.470	0.000	0.000	0.000	0.000	0.000	0.000	0.000	0.000	0.000	0.000	0.000	0.000	0.000	0.000	156	594	537	545	-0.892	Error	Error	188	349	0	0	191	354	0	0	0	0
2	13	1	"SLI15"	"YBR156C"	8830	14460	140	2167	2360	1252	94	99	37	100	100	0	3639	3938	2176	276	287	87	98	97	0	0	0	0	0	0	0	0	0	0	0	0	0	0	0	0	0	0	0	0.616	0.619	0.607	0.680	2.166	0.541	0.801	0.000	0.000	0.000	0.000	0.000	0.000	0.000	0.000	0.000	0.000	0.000	0.000	0.000	0.000	156	650	5436	5928	-0.698	Error	Error	2073	3363	0	0	2266	3662	0	0	0	0
2	14	1	""	"YBR187W"	9030	14460	140	3117	3096	1288	88	92	35	100	98	0	2981	2828	1201	270	280	86	94	92	0	0	0	0	0	0	0	0	0	0	0	0	0	0	0	0	0	0	0	1.117	1.176	1.137	1.181	1.880	1.148	0.822	0.000	0.000	0.000	0.000	0.000	0.000	0.000	0.000	0.000	0.000	0.000	0.000	0.000	0.000	156	652	5740	5566	0.160	Error	Error	3029	2711	0	0	3008	2558	0	0	0	0
2	15	1	""	"YBR219C"	9220	14460	140	2392	2314	929	84	88	32	97	97	0	2708	2572	1155	265	271	81	93	91	0	0	0	0	0	0	0	0	0	0	0	0	0	0	0	0	0	0	0	0.945	0.967	0.939	1.008	1.883	0.930	0.857	0.000	0.000	0.000	0.000	0.000	0.000	0.000	0.000	0.000	0.000	0.000	0.000	0.000	0.000	156	626	4751	4537	-0.082	Error	Error	2308	2443	0	0	2230	2307	0	0	0	0
2	16	1	""	"YBR158W"	9410	14460	150	2222	2224	956	81	86	43	99	98	0	3113	3077	1385	258	267	88	95	94	0	0	0	0	0	0	0	0	0	0	0	0	0	0	0	0	0	0	0	0.750	0.760	0.759	0.792	1.851	0.731	0.831	0.000	0.000	0.000	0.000	0.000	0.000	0.000	0.000	0.000	0.000	0.000	0.000	0.000	0.000	156	716	4996	4962	-0.415	Error	Error	2141	2855	0	0	2143	2819	0	0	0	0
2	17	1	"RPS9B"	"YBR189W"	9590	14460	150	3423	3174	1355	81	86	43	100	100	0	3599	3307	1507	254	268	101	94	94	0	0	0	0	0	0	0	0	0	0	0	0	0	0	0	0	0	0	0	0.999	1.013	1.021	1.129	1.940	0.983	0.838	0.000	0.000	0.000	0.000	0.000	0.000	0.000	0.000	0.000	0.000	0.000	0.000	0.000	0.000	156	729	6687	6146	-0.001	Error	Error	3342	3345	0	0	3093	3053	0	0	0	0
2	18	1	"pdb1"	"YBR221C"	9770	14470	140	1993	1938	775	82	87	34	99	98	0	2179	2047	858	255	267	86	93	92	0	0	0	0	0	0	0	0	0	0	0	0	0	0	0	0	0	0	0	0.993	1.036	0.961	1.098	2.033	0.955	0.778	0.000	0.000	0.000	0.000	0.000	0.000	0.000	0.000	0.000	0.000	0.000	0.000	0.000	0.000	156	644	3835	3648	-0.010	Error	Error	1911	1924	0	0	1856	1792	0	0	0	0
2	19	1	"cdc28"	"YBR160W"	9980	14470	150	2626	2514	984	83	92	105	99	97	0	3019	2857	1137	256	264	87	95	94	0	0	0	0	0	0	0	0	0	0	0	0	0	0	0	0	0	0	0	0.920	0.935	0.928	0.940	1.690	0.897	0.817	0.000	0.000	0.000	0.000	0.000	0.000	0.000	0.000	0.000	0.000	0.000	0.000	0.000	0.000	156	714	5306	5032	-0.120	Error	Error	2543	2763	0	0	2431	2601	0	0	0	0
2	20	1	"RPL21A"	"YBR191W"	10170	14470	150	2119	1996	742	81	91	110	98	96	0	3767	3438	1270	256	273	151	95	94	0	0	0	0	0	0	0	0	0	0	0	0	0	0	0	0	0	0	0	0.580	0.602	0.585	0.629	1.781	0.587	0.835	0.000	0.000	0.000	0.000	0.000	0.000	0.000	0.000	0.000	0.000	0.000	0.000	0.000	0.000	156	728	5549	5097	-0.785	Error	Error	2038	3511	0	0	1915	3182	0	0	0	0
2	21	1	""	"YBR223C"	10360	14470	140	1833	1747	771	83	98	110	96	94	0	1603	1499	617	269	329	339	90	80	0	0	0	0	0	0	0	0	0	0	0	0	0	0	0	0	0	0	0	1.312	1.353	1.345	1.373	1.831	1.346	0.799	0.000	0.000	0.000	0.000	0.000	0.000	0.000	0.000	0.000	0.000	0.000	0.000	0.000	0.000	156	683	3084	2894	0.392	Error	Error	1750	1334	0	0	1664	1230	0	0	0	0
2	22	1	""	"YBR162C"	10550	14470	140	2062	2009	838	79	99	151	97	94	0	3076	3053	1287	259	311	321	93	91	0	0	0	0	0	0	0	0	0	0	0	0	0	0	0	0	0	0	0	0.704	0.691	0.694	0.707	1.794	0.658	0.848	0.000	0.000	0.000	0.000	0.000	0.000	0.000	0.000	0.000	0.000	0.000	0.000	0.000	0.000	156	804	4800	4724	-0.506	Error	Error	1983	2817	0	0	1930	2794	0	0	0	0
2	1	2	"MED8"	"YBR193C"	6560	14650	140	4495	4421	2215	96	102	44	99	98	0	9484	9722	4568	280	297	99	100	100	0	0	0	0	0	0	0	0	0	0	0	0	0	0	0	0	0	0	0	0.478	0.458	0.445	0.454	2.055	0.430	0.810	0.000	0.000	0.000	0.000	0.000	0.000	0.000	0.000	0.000	0.000	0.000	0.000	0.000	0.000	156	638	13603	13767	-1.065	Error	Error	4399	9204	0	0	4325	9442	0	0	0	0
2	2	2	""	"YBR225W"	6750	14660	150	8925	8865	2871	100	116	83	100	100	0	10836	10926	4382	290	312	165	98	97	0	0	0	0	0	0	0	0	0	0	0	0	0	0	0	0	0	0	0	0.837	0.824	0.791	0.912	1.957	0.778	0.855	0.000	0.000	0.000	0.000	0.000	0.000	0.000	0.000	0.000	0.000	0.000	0.000	0.000	0.000	156	532	19371	19401	-0.257	Error	Error	8825	10546	0	0	8765	10636	0	0	0	0
2	3	2	""	"YDL062W"	6950	14660	140	2627	2385	766	108	123	82	99	98	0	3348	3088	1047	298	315	122	97	95	0	0	0	0	0	0	0	0	0	0	0	0	0	0	0	0	0	0	0	0.826	0.816	0.814	0.835	1.669	0.776	0.852	0.000	0.000	0.000	0.000	0.000	0.000	0.000	0.000	0.000	0.000	0.000	0.000	0.000	0.000	156	503	5569	5067	-0.276	Error	Error	2519	3050	0	0	2277	2790	0	0	0	0
2	4	2	""	"YDL094C"	7130	14660	140	3746	3601	1263	105	112	67	100	100	0	5583	5239	1976	299	310	113	100	98	0	0	0	0	0	0	0	0	0	0	0	0	0	0	0	0	0	0	0	0.689	0.708	0.687	0.743	1.901	0.664	0.827	0.000	0.000	0.000	0.000	0.000	0.000	0.000	0.000	0.000	0.000	0.000	0.000	0.000	0.000	156	503	8925	8436	-0.537	Error	Error	3641	5284	0	0	3496	4940	0	0	0	0
2	5	2	"CDC48"	"YDL126C"	7320	14660	140	3295	3706	1907	96	115	135	100	100	0	5389	5882	3143	287	303	129	99	98	0	0	0	0	0	0	0	0	0	0	0	0	0	0	0	0	0	0	0	0.627	0.645	0.649	0.642	1.769	0.599	0.786	0.000	0.000	0.000	0.000	0.000	0.000	0.000	0.000	0.000	0.000	0.000	0.000	0.000	0.000	156	564	8301	9205	-0.673	Error	Error	3199	5102	0	0	3610	5595	0	0	0	0
2	6	2	"UBC9"	"YDL064W"	7530	14660	140	3644	3317	1159	91	116	147	98	96	0	6387	5978	1945	272	296	165	99	97	0	0	0	0	0	0	0	0	0	0	0	0	0	0	0	0	0	0	0	0.581	0.565	0.582	0.558	1.786	0.549	0.884	0.000	0.000	0.000	0.000	0.000	0.000	0.000	0.000	0.000	0.000	0.000	0.000	0.000	0.000	156	641	9668	8932	-0.783	Error	Error	3553	6115	0	0	3226	5706	0	0	0	0
2	7	2	""	"YDL096C"	7710	14660	140	2819	2662	946	94	102	60	100	100	0	2338	2244	853	270	290	146	95	92	0	0	0	0	0	0	0	0	0	0	0	0	0	0	0	0	0	0	0	1.318	1.301	1.314	1.360	1.956	1.274	0.816	0.000	0.000	0.000	0.000	0.000	0.000	0.000	0.000	0.000	0.000	0.000	0.000	0.000	0.000	156	615	4793	4542	0.398	Error	Error	2725	2068	0	0	2568	1974	0	0	0	0
2	8	2	"VCX1"	"YDL128W"	7900	14660	140	3205	3847	2635	97	104	48	100	99	0	4479	5195	3246	274	289	100	98	97	0	0	0	0	0	0	0	0	0	0	0	0	0	0	0	0	0	0	0	0.739	0.762	0.731	0.763	2.238	0.749	0.777	0.000	0.000	0.000	0.000	0.000	0.000	0.000	0.000	0.000	0.000	0.000	0.000	0.000	0.000	156	503	7313	8671	-0.436	Error	Error	3108	4205	0	0	3750	4921	0	0	0	0
2	9	2	"IDP1"	"YDL066W"	8080	14660	140	4627	4255	1434	95	126	179	98	96	0	8400	7864	2544	273	305	209	97	97	0	0	0	0	0	0	0	0	0	0	0	0	0	0	0	0	0	0	0	0.558	0.548	0.555	0.551	1.865	0.531	0.888	0.000	0.000	0.000	0.000	0.000	0.000	0.000	0.000	0.000	0.000	0.000	0.000	0.000	0.000	156	470	12659	11751	-0.843	Error	Error	4532	8127	0	0	4160	7591	0	0	0	0
2	10	2	"SNU23"	"YDL098C"	8250	14660	140	3611	3366	1368	96	133	206	98	94	0	4683	4353	1928	279	328	307	94	91	0	0	0	0	0	0	0	0	0	0	0	0	0	0	0	0	0	0	0	0.798	0.803	0.775	0.851	2.169	0.749	0.826	0.000	0.000	0.000	0.000	0.000	0.000	0.000	0.000	0.000	0.000	0.000	0.000	0.000	0.000	156	487	7919	7344	-0.325	Error	Error	3515	4404	0	0	3270	4074	0	0	0	0
2	11	2	"RPP1B"	"YDL130W"	8460	14660	140	2238	2229	905	97	106	59	99	98	0	3556	3438	1337	274	296	185	96	94	0	0	0	0	0	0	0	0	0	0	0	0	0	0	0	0	0	0	0	0.652	0.674	0.666	0.676	2.160	0.647	0.803	0.000	0.000	0.000	0.000	0.000	0.000	0.000	0.000	0.000	0.000	0.000	0.000	0.000	0.000	156	493	5423	5296	-0.616	Error	Error	2141	3282	0	0	2132	3164	0	0	0	0
2	12	2	""	"YDL068W"	8660	14660	140	2599	2451	865	94	101	48	100	99	0	5407	5099	1754	279	291	90	100	99	0	0	0	0	0	0	0	0	0	0	0	0	0	0	0	0	0	0	0	0.488	0.489	0.500	0.489	1.840	0.459	0.858	0.000	0.000	0.000	0.000	0.000	0.000	0.000	0.000	0.000	0.000	0.000	0.000	0.000	0.000	156	462	7633	7177	-1.034	Error	Error	2505	5128	0	0	2357	4820	0	0	0	0
2	13	2	""	"YDL100C"	8840	14660	140	4969	4635	2040	92	117	188	98	96	0	4637	4403	1961	281	295	95	99	96	0	0	0	0	0	0	0	0	0	0	0	0	0	0	0	0	0	0	0	1.120	1.102	1.084	1.096	1.919	1.116	0.811	0.000	0.000	0.000	0.000	0.000	0.000	0.000	0.000	0.000	0.000	0.000	0.000	0.000	0.000	156	512	9233	8665	0.163	Error	Error	4877	4356	0	0	4543	4122	0	0	0	0
2	14	2	"LYS21"	"YDL131W"	9040	14660	140	3512	3434	1560	85	93	45	100	97	0	4409	4181	1915	273	284	98	94	94	0	0	0	0	0	0	0	0	0	0	0	0	0	0	0	0	0	0	0	0.829	0.857	0.846	0.862	1.868	0.835	0.817	0.000	0.000	0.000	0.000	0.000	0.000	0.000	0.000	0.000	0.000	0.000	0.000	0.000	0.000	156	541	7563	7257	-0.271	Error	Error	3427	4136	0	0	3349	3908	0	0	0	0
2	15	2	"CCT6"	"YDR188W"	9220	14660	140	3165	2978	1185	83	89	39	100	100	0	2821	2654	1119	269	280	107	96	95	0	0	0	0	0	0	0	0	0	0	0	0	0	0	0	0	0	0	0	1.208	1.214	1.233	1.283	2.152	1.202	0.768	0.000	0.000	0.000	0.000	0.000	0.000	0.000	0.000	0.000	0.000	0.000	0.000	0.000	0.000	156	525	5634	5280	0.272	Error	Error	3082	2552	0	0	2895	2385	0	0	0	0
2	16	2	"adr1"	"YDR216W"	9410	14660	150	1690	1942	1305	84	91	41	98	96	0	3596	3934	2501	262	280	113	95	94	0	0	0	0	0	0	0	0	0	0	0	0	0	0	0	0	0	0	0	0.482	0.506	0.494	0.525	2.219	0.480	0.742	0.000	0.000	0.000	0.000	0.000	0.000	0.000	0.000	0.000	0.000	0.000	0.000	0.000	0.000	156	582	4940	5530	-1.054	Error	Error	1606	3334	0	0	1858	3672	0	0	0	0
2	17	2	""	"YDR248C"	9630	14670	130	564	632	438	79	85	36	90	85	0	1305	1699	1287	252	266	99	86	80	0	0	0	0	0	0	0	0	0	0	0	0	0	0	0	0	0	0	0	0.461	0.382	0.372	0.365	2.259	0.332	0.809	0.000	0.000	0.000	0.000	0.000	0.000	0.000	0.000	0.000	0.000	0.000	0.000	0.000	0.000	120	521	1538	2000	-1.118	Error	Error	485	1053	0	0	553	1447	0	0	0	0
2	18	2	""	"YDR190C"	9810	14660	140	2311	2213	1029	76	83	35	98	96	0	5173	4904	2375	252	258	96	96	95	0	0	0	0	0	0	0	0	0	0	0	0	0	0	0	0	0	0	0	0.454	0.459	0.458	0.459	2.019	0.431	0.833	0.000	0.000	0.000	0.000	0.000	0.000	0.000	0.000	0.000	0.000	0.000	0.000	0.000	0.000	156	471	7156	6789	-1.139	Error	Error	2235	4921	0	0	2137	4652	0	0	0	0
2	19	2	"SPR28"	"YDR218C"	9990	14660	140	2450	2372	1246	79	90	71	96	95	0	2918	2946	1529	255	265	108	95	93	0	0	0	0	0	0	0	0	0	0	0	0	0	0	0	0	0	0	0	0.890	0.852	0.853	0.804	2.207	0.805	0.766	0.000	0.000	0.000	0.000	0.000	0.000	0.000	0.000	0.000	0.000	0.000	0.000	0.000	0.000	156	486	5034	4984	-0.168	Error	Error	2371	2663	0	0	2293	2691	0	0	0	0
2	20	2	""	"YDR250C"	10180	14660	130	964	929	412	81	94	76	93	92	0	1120	1033	464	263	278	107	85	83	0	0	0	0	0	0	0	0	0	0	0	0	0	0	0	0	0	0	0	1.030	1.101	1.110	1.058	2.165	0.991	0.753	0.000	0.000	0.000	0.000	0.000	0.000	0.000	0.000	0.000	0.000	0.000	0.000	0.000	0.000	120	504	1740	1618	0.043	Error	Error	883	857	0	0	848	770	0	0	0	0
2	21	2	"NUP42"	"YDR192C"	10380	14670	130	2552	2525	1364	89	136	234	91	90	0	3807	3570	1927	276	381	439	85	83	0	0	0	0	0	0	0	0	0	0	0	0	0	0	0	0	0	0	0	0.698	0.740	0.747	0.835	2.408	0.717	0.827	0.000	0.000	0.000	0.000	0.000	0.000	0.000	0.000	0.000	0.000	0.000	0.000	0.000	0.000	120	510	5994	5730	-0.520	Error	Error	2463	3531	0	0	2436	3294	0	0	0	0
2	22	2	""	"YDR220C"	10580	14660	140	1114	1074	498	80	112	195	90	85	0	972	950	415	257	331	369	78	47	0	0	0	0	0	0	0	0	0	0	0	0	0	0	0	0	0	0	0	1.446	1.434	1.483	1.396	1.755	1.016	0.437	0.000	0.000	0.000	0.000	0.000	0.000	0.000	0.000	0.000	0.000	0.000	0.000	0.000	0.000	156	743	1749	1687	0.532	Error	Error	1034	715	0	0	994	693	0	0	0	0
2	1	3	"BTT1"	"YDR252W"	6590	14850	140	2897	2725	1088	90	102	72	100	100	0	4017	3871	1504	276	297	151	98	97	0	0	0	0	0	0	0	0	0	0	0	0	0	0	0	0	0	0	0	0.750	0.733	0.721	0.743	1.815	0.702	0.842	0.000	0.000	0.000	0.000	0.000	0.000	0.000	0.000	0.000	0.000	0.000	0.000	0.000	0.000	156	676	6548	6230	-0.414	Error	Error	2807	3741	0	0	2635	3595	0	0	0	0
2	2	3	"MSS116"	"YDR194C"	6780	14850	140	7099	7241	2860	93	109	87	100	100	0	6570	6541	2417	294	317	175	98	98	0	0	0	0	0	0	0	0	0	0	0	0	0	0	0	0	0	0	0	1.116	1.144	1.118	1.120	1.494	1.159	0.861	0.000	0.000	0.000	0.000	0.000	0.000	0.000	0.000	0.000	0.000	0.000	0.000	0.000	0.000	156	445	13282	13395	0.159	Error	Error	7006	6276	0	0	7148	6247	0	0	0	0
2	3	3	""	"YDR222W"	6950	14850	150	5432	5467	2382	108	138	203	100	98	0	8072	7987	3195	305	345	286	100	99	0	0	0	0	0	0	0	0	0	0	0	0	0	0	0	0	0	0	0	0.685	0.698	0.718	0.685	1.571	0.683	0.875	0.000	0.000	0.000	0.000	0.000	0.000	0.000	0.000	0.000	0.000	0.000	0.000	0.000	0.000	156	541	13091	13041	-0.545	Error	Error	5324	7767	0	0	5359	7682	0	0	0	0
2	4	3	"CHL4"	"YDR254W"	7160	14850	140	6923	6783	3371	101	105	40	100	100	0	13802	12770	5757	301	309	95	100	100	0	0	0	0	0	0	0	0	0	0	0	0	0	0	0	0	0	0	0	0.505	0.536	0.534	0.543	1.774	0.514	0.829	0.000	0.000	0.000	0.000	0.000	0.000	0.000	0.000	0.000	0.000	0.000	0.000	0.000	0.000	156	552	20323	19151	-0.985	Error	Error	6822	13501	0	0	6682	12469	0	0	0	0
2	5	3	"UBC8"	"YEL012W"	7350	14850	130	4492	4348	1111	93	110	107	100	100	0	5323	5393	1299	294	309	146	100	100	0	0	0	0	0	0	0	0	0	0	0	0	0	0	0	0	0	0	0	0.875	0.834	0.872	0.825	1.349	0.825	0.897	0.000	0.000	0.000	0.000	0.000	0.000	0.000	0.000	0.000	0.000	0.000	0.000	0.000	0.000	120	537	9428	9354	-0.193	Error	Error	4399	5029	0	0	4255	5099	0	0	0	0
2	6	3	"GDA1"	"YEL042W"	7550	14860	110	3604	3875	1902	89	107	101	100	100	0	4449	4904	2066	284	301	158	100	100	0	0	0	0	0	0	0	0	0	0	0	0	0	0	0	0	0	0	0	0.844	0.819	0.830	0.781	1.456	0.797	0.858	0.000	0.000	0.000	0.000	0.000	0.000	0.000	0.000	0.000	0.000	0.000	0.000	0.000	0.000	80	473	7680	8406	-0.245	Error	Error	3515	4165	0	0	3786	4620	0	0	0	0
2	7	3	""	"YEL073C"	7740	14860	120	253	269	110	86	91	32	94	85	0	518	546	197	278	288	100	84	59	0	0	0	0	0	0	0	0	0	0	0	0	0	0	0	0	0	0	0	0.696	0.683	0.632	0.656	2.090	0.005	0.004	0.000	0.000	0.000	0.000	0.000	0.000	0.000	0.000	0.000	0.000	0.000	0.000	0.000	0.000	120	497	407	451	-0.523	Error	Error	167	240	0	0	183	268	0	0	0	0
2	8	3	""	"YEL014C"	7930	14860	120	2765	2590	991	88	97	73	100	96	0	2744	2615	997	273	284	110	96	96	0	0	0	0	0	0	0	0	0	0	0	0	0	0	0	0	0	0	0	1.083	1.068	1.072	1.096	1.574	1.060	0.861	0.000	0.000	0.000	0.000	0.000	0.000	0.000	0.000	0.000	0.000	0.000	0.000	0.000	0.000	120	503	5148	4844	0.116	Error	Error	2677	2471	0	0	2502	2342	0	0	0	0
2	9	3	""	"YEL044W"	8110	14870	110	2559	2514	834	93	138	247	100	98	0	2249	2312	859	281	332	301	98	93	0	0	0	0	0	0	0	0	0	0	0	0	0	0	0	0	0	0	0	1.253	1.192	1.204	1.259	1.577	1.122	0.832	0.000	0.000	0.000	0.000	0.000	0.000	0.000	0.000	0.000	0.000	0.000	0.000	0.000	0.000	80	478	4434	4452	0.325	Error	Error	2466	1968	0	0	2421	2031	0	0	0	0
2	10	3	""	"YEL075C"	8310	14860	140	25616	24265	9903	94	131	216	100	100	0	20052	18975	7861	280	333	303	96	96	0	0	0	0	0	0	0	0	0	0	0	0	0	0	0	0	0	0	0	1.291	1.293	1.308	1.364	2.180	1.305	0.888	0.000	0.000	0.000	0.000	0.000	0.000	0.000	0.000	0.000	0.000	0.000	0.000	0.000	0.000	156	593	45294	42866	0.368	Error	Error	25522	19772	0	0	24171	18695	0	0	0	0
2	11	3	""	"YEL016C"	8500	14850	130	7500	7376	2455	98	105	54	100	100	0	7044	6982	1993	287	299	101	100	100	0	0	0	0	0	0	0	0	0	0	0	0	0	0	0	0	0	0	0	1.095	1.087	1.084	1.068	1.304	1.082	0.905	0.000	0.000	0.000	0.000	0.000	0.000	0.000	0.000	0.000	0.000	0.000	0.000	0.000	0.000	120	470	14159	13973	0.132	Error	Error	7402	6757	0	0	7278	6695	0	0	0	0
2	12	3	"GLY1"	"YEL046C"	8690	14860	140	4555	4322	1579	97	122	193	99	99	0	4505	4304	1521	287	298	100	98	97	0	0	0	0	0	0	0	0	0	0	0	0	0	0	0	0	0	0	0	1.057	1.052	1.103	1.083	2.104	1.051	0.867	0.000	0.000	0.000	0.000	0.000	0.000	0.000	0.000	0.000	0.000	0.000	0.000	0.000	0.000	156	553	8676	8242	0.080	Error	Error	4458	4218	0	0	4225	4017	0	0	0	0
2	13	3	""	"YEL076C-A"	8890	14860	130	24885	22935	8514	90	115	194	100	100	0	18407	17095	5055	277	292	99	100	100	0	0	0	0	0	0	0	0	0	0	0	0	0	0	0	0	0	0	0	1.368	1.358	1.374	1.293	1.521	1.419	0.880	0.000	0.000	0.000	0.000	0.000	0.000	0.000	0.000	0.000	0.000	0.000	0.000	0.000	0.000	120	529	42925	39663	0.452	Error	Error	24795	18130	0	0	22845	16818	0	0	0	0
2	14	3	""	"YEL017W"	9050	14860	110	381	402	150	88	98	63	100	97	0	615	689	270	273	289	111	93	77	0	0	0	0	0	0	0	0	0	0	0	0	0	0	0	0	0	0	0	0.857	0.755	0.786	0.872	1.959	0.579	0.601	0.000	0.000	0.000	0.000	0.000	0.000	0.000	0.000	0.000	0.000	0.000	0.000	0.000	0.000	80	442	635	730	-0.223	Error	Error	293	342	0	0	314	416	0	0	0	0
2	15	3	""	"YEL048C"	9260	14860	120	1739	1597	533	86	97	58	99	99	0	3073	2938	1015	280	291	113	100	99	0	0	0	0	0	0	0	0	0	0	0	0	0	0	0	0	0	0	0	0.592	0.568	0.577	0.577	1.680	0.530	0.855	0.000	0.000	0.000	0.000	0.000	0.000	0.000	0.000	0.000	0.000	0.000	0.000	0.000	0.000	120	519	4446	4169	-0.757	Error	Error	1653	2793	0	0	1511	2658	0	0	0	0
2	16	3	""	"YEL077C"	9450	14860	140	20653	21878	10379	84	89	34	100	100	0	16827	16662	8086	263	274	91	97	96	0	0	0	0	0	0	0	0	0	0	0	0	0	0	0	0	0	0	0	1.242	1.329	1.270	1.511	2.315	1.336	0.867	0.000	0.000	0.000	0.000	0.000	0.000	0.000	0.000	0.000	0.000	0.000	0.000	0.000	0.000	156	600	37133	38193	0.312	Error	Error	20569	16564	0	0	21794	16399	0	0	0	0
2	17	3	"RPL29"	"YFR032C-A"	9650	14860	130	683	637	210	79	84	31	98	97	0	1022	974	323	256	264	83	91	90	0	0	0	0	0	0	0	0	0	0	0	0	0	0	0	0	0	0	0	0.789	0.777	0.782	0.756	1.926	0.674	0.729	0.000	0.000	0.000	0.000	0.000	0.000	0.000	0.000	0.000	0.000	0.000	0.000	0.000	0.000	120	511	1370	1276	-0.343	Error	Error	604	766	0	0	558	718	0	0	0	0
2	18	3	""	"YGL007W"	9840	14860	140	1443	1305	583	76	81	31	98	96	0	1174	1073	467	255	260	96	87	85	0	0	0	0	0	0	0	0	0	0	0	0	0	0	0	0	0	0	0	1.487	1.502	1.441	1.492	2.114	1.463	0.802	0.000	0.000	0.000	0.000	0.000	0.000	0.000	0.000	0.000	0.000	0.000	0.000	0.000	0.000	156	561	2286	2047	0.573	Error	Error	1367	919	0	0	1229	818	0	0	0	0
2	19	3	""	"YGL039W"	10030	14860	130	2856	2616	967	76	82	47	100	99	0	6793	6363	2103	255	262	85	100	100	0	0	0	0	0	0	0	0	0	0	0	0	0	0	0	0	0	0	0	0.425	0.416	0.415	0.399	1.506	0.395	0.866	0.000	0.000	0.000	0.000	0.000	0.000	0.000	0.000	0.000	0.000	0.000	0.000	0.000	0.000	120	515	9318	8648	-1.234	Error	Error	2780	6538	0	0	2540	6108	0	0	0	0
2	20	3	"pho4"	"YFR034C"	10220	14860	140	1619	1486	583	76	84	48	98	96	0	1273	1190	444	255	268	95	93	92	0	0	0	0	0	0	0	0	0	0	0	0	0	0	0	0	0	0	0	1.516	1.508	1.544	1.501	1.820	1.505	0.821	0.000	0.000	0.000	0.000	0.000	0.000	0.000	0.000	0.000	0.000	0.000	0.000	0.000	0.000	156	579	2561	2345	0.600	Error	Error	1543	1018	0	0	1410	935	0	0	0	0
2	21	3	"leu1"	"YGL009C"	10410	14860	140	3329	3428	1634	76	99	171	98	96	0	6884	7114	3049	252	276	207	97	97	0	0	0	0	0	0	0	0	0	0	0	0	0	0	0	0	0	0	0	0.491	0.488	0.485	0.472	1.755	0.479	0.873	0.000	0.000	0.000	0.000	0.000	0.000	0.000	0.000	0.000	0.000	0.000	0.000	0.000	0.000	156	566	9885	10214	-1.028	Error	Error	3253	6632	0	0	3352	6862	0	0	0	0
2	22	3	""	"YGL041C"	10600	14870	120	1445	1346	557	77	79	31	100	100	0	2759	2634	1078	250	258	75	97	96	0	0	0	0	0	0	0	0	0	0	0	0	0	0	0	0	0	0	0	0.545	0.532	0.540	0.566	2.200	0.502	0.820	0.000	0.000	0.000	0.000	0.000	0.000	0.000	0.000	0.000	0.000	0.000	0.000	0.000	0.000	120	553	3877	3653	-0.875	Error	Error	1368	2509	0	0	1269	2384	0	0	0	0
2	1	4	"cdc26"	"YFR036W"	6620	15050	130	3237	2911	998	86	93	45	100	100	0	5100	4612	1526	272	279	87	100	100	0	0	0	0	0	0	0	0	0	0	0	0	0	0	0	0	0	0	0	0.653	0.651	0.649	0.643	1.633	0.623	0.838	0.000	0.000	0.000	0.000	0.000	0.000	0.000	0.000	0.000	0.000	0.000	0.000	0.000	0.000	120	589	7979	7165	-0.616	Error	Error	3151	4828	0	0	2825	4340	0	0	0	0
2	2	4	"SCL1"	"YGL011C"	6800	15050	140	7002	6444	2708	89	127	218	99	98	0	11592	10749	4819	292	329	278	97	96	0	0	0	0	0	0	0	0	0	0	0	0	0	0	0	0	0	0	0	0.612	0.608	0.615	0.651	2.289	0.571	0.849	0.000	0.000	0.000	0.000	0.000	0.000	0.000	0.000	0.000	0.000	0.000	0.000	0.000	0.000	156	571	18213	16812	-0.709	Error	Error	6913	11300	0	0	6355	10457	0	0	0	0
2	3	4	"dst1"	"YGL043W"	7010	15060	110	2826	2819	1360	95	138	241	96	92	0	4192	4130	1819	299	337	307	96	95	0	0	0	0	0	0	0	0	0	0	0	0	0	0	0	0	0	0	0	0.702	0.711	0.711	0.657	1.976	0.671	0.774	0.000	0.000	0.000	0.000	0.000	0.000	0.000	0.000	0.000	0.000	0.000	0.000	0.000	0.000	80	453	6624	6555	-0.511	Error	Error	2731	3893	0	0	2724	3831	0	0	0	0
2	4	4	""	"YFR038W"	7180	15050	130	5839	5705	2528	94	97	33	100	100	0	7608	6987	2753	286	297	88	100	100	0	0	0	0	0	0	0	0	0	0	0	0	0	0	0	0	0	0	0	0.785	0.837	0.842	0.824	1.585	0.850	0.819	0.000	0.000	0.000	0.000	0.000	0.000	0.000	0.000	0.000	0.000	0.000	0.000	0.000	0.000	120	536	13067	12312	-0.350	Error	Error	5745	7322	0	0	5611	6701	0	0	0	0
2	5	4	"PDR1"	"YGL013C"	7380	15050	140	3398	4016	2905	89	96	56	99	98	0	7123	8136	4987	284	296	89	99	98	0	0	0	0	0	0	0	0	0	0	0	0	0	0	0	0	0	0	0	0.484	0.500	0.471	0.487	2.545	0.505	0.846	0.000	0.000	0.000	0.000	0.000	0.000	0.000	0.000	0.000	0.000	0.000	0.000	0.000	0.000	156	621	10148	11779	-1.047	Error	Error	3309	6839	0	0	3927	7852	0	0	0	0
2	6	4	""	"YGL045W"	7560	15050	130	5216	6236	3152	84	105	173	100	100	0	12442	13753	6367	277	341	624	100	100	0	0	0	0	0	0	0	0	0	0	0	0	0	0	0	0	0	0	0	0.422	0.457	0.454	0.442	1.499	0.443	0.908	0.000	0.000	0.000	0.000	0.000	0.000	0.000	0.000	0.000	0.000	0.000	0.000	0.000	0.000	120	544	17297	19628	-1.245	Error	Error	5132	12165	0	0	6152	13476	0	0	0	0
2	7	4	"PRP31"	"YGR091W"	7760	15050	140	4622	4406	1582	85	111	279	98	97	0	6733	6106	2527	271	351	685	90	89	0	0	0	0	0	0	0	0	0	0	0	0	0	0	0	0	0	0	0	0.702	0.741	0.728	0.854	2.724	0.682	0.840	0.000	0.000	0.000	0.000	0.000	0.000	0.000	0.000	0.000	0.000	0.000	0.000	0.000	0.000	156	570	10999	10156	-0.510	Error	Error	4537	6462	0	0	4321	5835	0	0	0	0
2	8	4	"MEP1"	"YGR121C"	7950	15060	120	5416	5101	2419	84	99	246	99	97	0	5483	5309	2487	272	300	351	93	91	0	0	0	0	0	0	0	0	0	0	0	0	0	0	0	0	0	0	0	1.023	0.996	0.986	1.046	2.139	0.975	0.802	0.000	0.000	0.000	0.000	0.000	0.000	0.000	0.000	0.000	0.000	0.000	0.000	0.000	0.000	120	485	10543	10054	0.033	Error	Error	5332	5211	0	0	5017	5037	0	0	0	0
2	9	4	"rsr1"	"YGR152C"	8130	15060	110	834	836	402	86	100	112	98	95	0	1205	1345	642	273	297	158	96	92	0	0	0	0	0	0	0	0	0	0	0	0	0	0	0	0	0	0	0	0.803	0.700	0.720	0.714	1.770	0.646	0.710	0.000	0.000	0.000	0.000	0.000	0.000	0.000	0.000	0.000	0.000	0.000	0.000	0.000	0.000	80	460	1680	1822	-0.317	Error	Error	748	932	0	0	750	1072	0	0	0	0
2	10	4	""	"YGR093W"	8340	15050	140	4402	3911	1695	95	105	101	97	96	0	5233	4698	1861	280	317	294	96	93	0	0	0	0	0	0	0	0	0	0	0	0	0	0	0	0	0	0	0	0.870	0.864	0.855	0.789	2.076	0.865	0.859	0.000	0.000	0.000	0.000	0.000	0.000	0.000	0.000	0.000	0.000	0.000	0.000	0.000	0.000	156	590	9260	8234	-0.202	Error	Error	4307	4953	0	0	3816	4418	0	0	0	0
2	11	4	""	"YGR122W"	8520	15050	130	5896	5614	2153	97	101	49	100	100	0	10577	10115	3615	287	295	103	100	100	0	0	0	0	0	0	0	0	0	0	0	0	0	0	0	0	0	0	0	0.564	0.561	0.569	0.555	1.595	0.552	0.883	0.000	0.000	0.000	0.000	0.000	0.000	0.000	0.000	0.000	0.000	0.000	0.000	0.000	0.000	120	508	16089	15345	-0.827	Error	Error	5799	10290	0	0	5517	9828	0	0	0	0
2	12	4	""	"YGR154C"	8700	15050	130	5168	4837	1913	95	100	49	100	100	0	5186	4820	1766	286	293	103	99	99	0	0	0	0	0	0	0	0	0	0	0	0	0	0	0	0	0	0	0	1.035	1.046	1.036	1.006	1.541	1.037	0.875	0.000	0.000	0.000	0.000	0.000	0.000	0.000	0.000	0.000	0.000	0.000	0.000	0.000	0.000	120	546	9973	9276	0.050	Error	Error	5073	4900	0	0	4742	4534	0	0	0	0
2	13	4	"RRP46"	"YGR095C"	8900	15060	130	2008	1969	722	90	98	75	100	99	0	6916	6553	2707	276	288	105	99	98	0	0	0	0	0	0	0	0	0	0	0	0	0	0	0	0	0	0	0	0.289	0.299	0.302	0.329	1.829	0.273	0.871	0.000	0.000	0.000	0.000	0.000	0.000	0.000	0.000	0.000	0.000	0.000	0.000	0.000	0.000	120	542	8558	8156	-1.792	Error	Error	1918	6640	0	0	1879	6277	0	0	0	0
2	14	4	"ASN2"	"YGR124W"	9080	15050	130	5365	5290	1915	86	96	58	100	100	0	6967	6522	2351	275	291	183	100	99	0	0	0	0	0	0	0	0	0	0	0	0	0	0	0	0	0	0	0	0.789	0.833	0.850	0.843	1.569	0.825	0.887	0.000	0.000	0.000	0.000	0.000	0.000	0.000	0.000	0.000	0.000	0.000	0.000	0.000	0.000	120	550	11971	11451	-0.342	Error	Error	5279	6692	0	0	5204	6247	0	0	0	0
2	15	4	""	"YGR156W"	9270	15050	130	3863	3626	1183	87	90	34	100	100	0	3920	3768	1146	272	277	88	100	100	0	0	0	0	0	0	0	0	0	0	0	0	0	0	0	0	0	0	0	1.035	1.012	1.006	0.998	1.374	1.016	0.873	0.000	0.000	0.000	0.000	0.000	0.000	0.000	0.000	0.000	0.000	0.000	0.000	0.000	0.000	120	548	7424	7035	0.050	Error	Error	3776	3648	0	0	3539	3496	0	0	0	0
2	16	4	"ASK10"	"YGR097W"	9470	15060	130	935	957	592	84	88	30	99	98	0	2185	2157	1161	260	267	80	93	91	0	0	0	0	0	0	0	0	0	0	0	0	0	0	0	0	0	0	0	0.442	0.460	0.455	0.482	1.984	0.384	0.717	0.000	0.000	0.000	0.000	0.000	0.000	0.000	0.000	0.000	0.000	0.000	0.000	0.000	0.000	120	514	2776	2770	-1.178	Error	Error	851	1925	0	0	873	1897	0	0	0	0
2	17	4	""	"YGR126W"	9650	15050	130	2022	1936	675	81	86	34	99	99	0	3980	3662	1443	260	271	111	98	95	0	0	0	0	0	0	0	0	0	0	0	0	0	0	0	0	0	0	0	0.522	0.545	0.541	0.587	1.592	0.502	0.882	0.000	0.000	0.000	0.000	0.000	0.000	0.000	0.000	0.000	0.000	0.000	0.000	0.000	0.000	120	530	5661	5257	-0.939	Error	Error	1941	3720	0	0	1855	3402	0	0	0	0
2	18	4	"MTR3"	"YGR158C"	9850	15060	130	2358	2260	736	79	83	33	100	100	0	8007	7410	2528	260	272	113	100	100	0	0	0	0	0	0	0	0	0	0	0	0	0	0	0	0	0	0	0	0.294	0.305	0.310	0.311	1.506	0.279	0.868	0.000	0.000	0.000	0.000	0.000	0.000	0.000	0.000	0.000	0.000	0.000	0.000	0.000	0.000	120	499	10026	9331	-1.765	Error	Error	2279	7747	0	0	2181	7150	0	0	0	0
2	19	4	""	"YHR113W"	10040	15060	130	3647	3462	1072	77	80	43	100	100	0	3631	3506	1010	250	269	164	99	99	0	0	0	0	0	0	0	0	0	0	0	0	0	0	0	0	0	0	0	1.056	1.040	1.053	1.024	1.355	1.030	0.887	0.000	0.000	0.000	0.000	0.000	0.000	0.000	0.000	0.000	0.000	0.000	0.000	0.000	0.000	120	522	6951	6641	0.078	Error	Error	3570	3381	0	0	3385	3256	0	0	0	0
2	20	4	""	"YHR143W"	10230	15060	130	2440	2345	861	74	77	30	100	100	0	3084	2956	1121	248	261	94	100	99	0	0	0	0	0	0	0	0	0	0	0	0	0	0	0	0	0	0	0	0.834	0.839	0.838	0.862	1.501	0.795	0.859	0.000	0.000	0.000	0.000	0.000	0.000	0.000	0.000	0.000	0.000	0.000	0.000	0.000	0.000	120	498	5202	4979	-0.261	Error	Error	2366	2836	0	0	2271	2708	0	0	0	0
2	21	4	"ENO2"	"YHR174W"	10420	15060	130	3398	3322	1077	76	78	28	100	100	0	5649	5348	1862	248	252	72	100	100	0	0	0	0	0	0	0	0	0	0	0	0	0	0	0	0	0	0	0	0.615	0.636	0.638	0.648	1.413	0.599	0.884	0.000	0.000	0.000	0.000	0.000	0.000	0.000	0.000	0.000	0.000	0.000	0.000	0.000	0.000	120	474	8723	8346	-0.701	Error	Error	3322	5401	0	0	3246	5100	0	0	0	0
2	22	4	""	"YHR115C"	10610	15060	130	3310	3147	778	77	81	30	100	100	0	5444	5163	1276	247	254	75	100	100	0	0	0	0	0	0	0	0	0	0	0	0	0	0	0	0	0	0	0	0.622	0.624	0.632	0.624	1.254	0.596	0.894	0.000	0.000	0.000	0.000	0.000	0.000	0.000	0.000	0.000	0.000	0.000	0.000	0.000	0.000	120	593	8430	7986	-0.685	Error	Error	3233	5197	0	0	3070	4916	0	0	0	0
2	1	5	"DCD1"	"YHR144C"	6620	15240	130	5766	5347	1652	88	91	33	100	100	0	8302	7812	2210	272	277	76	100	100	0	0	0	0	0	0	0	0	0	0	0	0	0	0	0	0	0	0	0	0.707	0.697	0.714	0.686	1.495	0.694	0.893	0.000	0.000	0.000	0.000	0.000	0.000	0.000	0.000	0.000	0.000	0.000	0.000	0.000	0.000	120	578	13708	12799	-0.500	Error	Error	5678	8030	0	0	5259	7540	0	0	0	0
2	2	5	""	"YHR176W"	6800	15240	130	6040	5609	1641	85	92	72	100	100	0	10124	9568	2506	277	296	197	100	100	0	0	0	0	0	0	0	0	0	0	0	0	0	0	0	0	0	0	0	0.605	0.595	0.606	0.585	1.361	0.580	0.903	0.000	0.000	0.000	0.000	0.000	0.000	0.000	0.000	0.000	0.000	0.000	0.000	0.000	0.000	120	502	15802	14815	-0.726	Error	Error	5955	9847	0	0	5524	9291	0	0	0	0
2	3	5	"TOM71"	"YHR117W"	7000	15240	130	5610	5422	2240	89	107	154	100	100	0	9984	9752	3925	284	302	210	100	100	0	0	0	0	0	0	0	0	0	0	0	0	0	0	0	0	0	0	0	0.569	0.563	0.569	0.562	1.509	0.543	0.881	0.000	0.000	0.000	0.000	0.000	0.000	0.000	0.000	0.000	0.000	0.000	0.000	0.000	0.000	120	575	15221	14801	-0.813	Error	Error	5521	9700	0	0	5333	9468	0	0	0	0
2	4	5	""	"YHR146W"	7190	15240	130	4470	4462	1539	91	98	52	100	100	0	4727	4750	1516	278	289	89	100	100	0	0	0	0	0	0	0	0	0	0	0	0	0	0	0	0	0	0	0	0.984	0.977	0.957	0.969	1.543	0.993	0.899	0.000	0.000	0.000	0.000	0.000	0.000	0.000	0.000	0.000	0.000	0.000	0.000	0.000	0.000	120	588	8828	8843	-0.023	Error	Error	4379	4449	0	0	4371	4472	0	0	0	0
2	5	5	"STB5"	"YHR178W"	7390	15250	130	7678	7482	2509	88	95	58	100	100	0	7331	7291	2039	277	291	91	100	100	0	0	0	0	0	0	0	0	0	0	0	0	0	0	0	0	0	0	0	1.076	1.054	1.069	1.037	1.363	1.052	0.888	0.000	0.000	0.000	0.000	0.000	0.000	0.000	0.000	0.000	0.000	0.000	0.000	0.000	0.000	120	498	14644	14408	0.106	Error	Error	7590	7054	0	0	7394	7014	0	0	0	0
2	6	5	"SET1"	"YHR119W"	7580	15250	130	10116	9704	3361	87	102	163	100	100	0	9742	9401	2873	275	312	408	100	100	0	0	0	0	0	0	0	0	0	0	0	0	0	0	0	0	0	0	0	1.059	1.054	1.090	1.031	1.352	1.064	0.908	0.000	0.000	0.000	0.000	0.000	0.000	0.000	0.000	0.000	0.000	0.000	0.000	0.000	0.000	120	468	19496	18743	0.083	Error	Error	10029	9467	0	0	9617	9126	0	0	0	0
2	7	5	"IMP3"	"YHR148W"	7760	15240	130	3952	3667	1429	88	89	34	99	99	0	10237	9640	4057	268	279	83	100	100	0	0	0	0	0	0	0	0	0	0	0	0	0	0	0	0	0	0	0	0.388	0.382	0.393	0.384	1.828	0.357	0.887	0.000	0.000	0.000	0.000	0.000	0.000	0.000	0.000	0.000	0.000	0.000	0.000	0.000	0.000	120	447	13833	12951	-1.367	Error	Error	3864	9969	0	0	3579	9372	0	0	0	0
2	8	5	""	"YHR180W"	7940	15240	130	2519	2310	787	81	86	40	100	100	0	4320	4018	1398	268	282	140	98	96	0	0	0	0	0	0	0	0	0	0	0	0	0	0	0	0	0	0	0	0.602	0.594	0.599	0.590	1.658	0.557	0.864	0.000	0.000	0.000	0.000	0.000	0.000	0.000	0.000	0.000	0.000	0.000	0.000	0.000	0.000	120	464	6490	5979	-0.733	Error	Error	2438	4052	0	0	2229	3750	0	0	0	0
2	9	5	""	"YJL049W"	8130	15240	130	3700	3549	1316	84	95	86	100	100	0	10283	9747	3667	277	313	309	100	100	0	0	0	0	0	0	0	0	0	0	0	0	0	0	0	0	0	0	0	0.361	0.366	0.367	0.364	1.581	0.328	0.863	0.000	0.000	0.000	0.000	0.000	0.000	0.000	0.000	0.000	0.000	0.000	0.000	0.000	0.000	120	508	13622	12935	-1.468	Error	Error	3616	10006	0	0	3465	9470	0	0	0	0
2	10	5	"ARP4"	"YJL081C"	8310	15240	130	4650	4438	1671	93	105	97	100	99	0	12353	12129	4632	290	349	483	100	99	0	0	0	0	0	0	0	0	0	0	0	0	0	0	0	0	0	0	0	0.378	0.367	0.377	0.364	1.574	0.346	0.905	0.000	0.000	0.000	0.000	0.000	0.000	0.000	0.000	0.000	0.000	0.000	0.000	0.000	0.000	120	523	16620	16184	-1.404	Error	Error	4557	12063	0	0	4345	11839	0	0	0	0
2	11	5	""	"YJL113W"	8510	15250	120	320	335	138	94	106	80	90	69	0	868	912	340	286	380	495	61	13	0	0	0	0	0	0	0	0	0	0	0	0	0	0	0	0	0	0	0	0.388	0.385	0.377	0.382	2.067	0.190	0.436	0.000	0.000	0.000	0.000	0.000	0.000	0.000	0.000	0.000	0.000	0.000	0.000	0.000	0.000	120	461	808	867	-1.365	Error	Error	226	582	0	0	241	626	0	0	0	0
2	12	5	""	"YJL051W"	8690	15250	130	5010	5477	2791	94	104	63	100	100	0	5986	5699	2442	280	335	259	99	99	0	0	0	0	0	0	0	0	0	0	0	0	0	0	0	0	0	0	0	0.862	0.993	0.947	0.972	1.647	1.030	0.857	0.000	0.000	0.000	0.000	0.000	0.000	0.000	0.000	0.000	0.000	0.000	0.000	0.000	0.000	120	480	10622	10802	-0.215	Error	Error	4916	5706	0	0	5383	5419	0	0	0	0
2	13	5	""	"YJL083W"	8880	15250	130	3649	3670	1604	92	95	34	100	100	0	3102	2909	1175	270	282	114	95	95	0	0	0	0	0	0	0	0	0	0	0	0	0	0	0	0	0	0	0	1.256	1.356	1.351	1.345	1.864	1.371	0.874	0.000	0.000	0.000	0.000	0.000	0.000	0.000	0.000	0.000	0.000	0.000	0.000	0.000	0.000	120	482	6389	6217	0.329	Error	Error	3557	2832	0	0	3578	2639	0	0	0	0
2	14	5	"asf1"	"YJL115W"	9060	15240	130	4831	4347	1390	87	133	343	100	96	0	6247	5603	2042	272	356	631	100	90	0	0	0	0	0	0	0	0	0	0	0	0	0	0	0	0	0	0	0	0.794	0.799	0.796	0.817	1.498	0.754	0.889	0.000	0.000	0.000	0.000	0.000	0.000	0.000	0.000	0.000	0.000	0.000	0.000	0.000	0.000	120	492	10719	9591	-0.333	Error	Error	4744	5975	0	0	4260	5331	0	0	0	0
2	15	5	"PEP8"	"YJL053W"	9250	15240	130	3616	3258	1023	87	144	360	99	95	0	4304	4112	1203	271	369	647	97	94	0	0	0	0	0	0	0	0	0	0	0	0	0	0	0	0	0	0	0	0.875	0.826	0.827	0.832	1.466	0.805	0.877	0.000	0.000	0.000	0.000	0.000	0.000	0.000	0.000	0.000	0.000	0.000	0.000	0.000	0.000	120	538	7562	7012	-0.193	Error	Error	3529	4033	0	0	3171	3841	0	0	0	0
2	16	5	"EXO70"	"YJL085W"	9440	15240	130	3916	3695	1412	85	101	149	100	99	0	7426	7079	2559	262	296	257	99	98	0	0	0	0	0	0	0	0	0	0	0	0	0	0	0	0	0	0	0	0.535	0.530	0.514	0.536	1.522	0.510	0.897	0.000	0.000	0.000	0.000	0.000	0.000	0.000	0.000	0.000	0.000	0.000	0.000	0.000	0.000	120	501	10995	10427	-0.903	Error	Error	3831	7164	0	0	3610	6817	0	0	0	0
2	17	5	"PHO86"	"YJL117W"	9630	15240	130	3420	3339	1390	83	88	40	100	100	0	3960	3613	1428	260	274	112	95	95	0	0	0	0	0	0	0	0	0	0	0	0	0	0	0	0	0	0	0	0.902	0.971	0.965	1.015	1.688	0.958	0.902	0.000	0.000	0.000	0.000	0.000	0.000	0.000	0.000	0.000	0.000	0.000	0.000	0.000	0.000	120	497	7037	6609	-0.149	Error	Error	3337	3700	0	0	3256	3353	0	0	0	0
2	18	5	""	"YJL055W"	9820	15240	140	3664	3359	1212	81	88	50	100	100	0	2592	2485	899	259	278	151	97	94	0	0	0	0	0	0	0	0	0	0	0	0	0	0	0	0	0	0	0	1.536	1.473	1.516	1.510	1.600	1.472	0.893	0.000	0.000	0.000	0.000	0.000	0.000	0.000	0.000	0.000	0.000	0.000	0.000	0.000	0.000	156	534	5916	5504	0.619	Error	Error	3583	2333	0	0	3278	2226	0	0	0	0
2	19	5	"TRL1"	"YJL087C"	10000	15240	130	2054	2557	1458	78	86	76	100	99	0	4418	4508	2309	257	289	256	97	95	0	0	0	0	0	0	0	0	0	0	0	0	0	0	0	0	0	0	0	0.475	0.583	0.583	0.605	1.827	0.572	0.879	0.000	0.000	0.000	0.000	0.000	0.000	0.000	0.000	0.000	0.000	0.000	0.000	0.000	0.000	120	454	6137	6730	-1.074	Error	Error	1976	4161	0	0	2479	4251	0	0	0	0
2	20	5	""	"YJL119C"	10190	15240	130	1128	1080	393	76	85	77	96	95	0	1154	1113	414	251	291	260	89	83	0	0	0	0	0	0	0	0	0	0	0	0	0	0	0	0	0	0	0	1.165	1.165	1.144	1.147	1.747	1.005	0.715	0.000	0.000	0.000	0.000	0.000	0.000	0.000	0.000	0.000	0.000	0.000	0.000	0.000	0.000	120	473	1955	1866	0.220	Error	Error	1052	903	0	0	1004	862	0	0	0	0
2	21	5	"PHD1"	"YKL043W"	10390	15240	140	5162	4686	1409	75	79	34	100	100	0	3791	3595	1042	249	264	101	99	98	0	0	0	0	0	0	0	0	0	0	0	0	0	0	0	0	0	0	0	1.436	1.378	1.391	1.368	1.564	1.384	0.896	0.000	0.000	0.000	0.000	0.000	0.000	0.000	0.000	0.000	0.000	0.000	0.000	0.000	0.000	156	506	8629	7957	0.522	Error	Error	5087	3542	0	0	4611	3346	0	0	0	0
2	22	5	"MUD2"	"YKL074C"	10580	15240	140	3821	3458	1175	77	79	28	100	100	0	2841	2727	953	250	253	72	98	98	0	0	0	0	0	0	0	0	0	0	0	0	0	0	0	0	0	0	0	1.445	1.365	1.343	1.426	1.922	1.349	0.887	0.000	0.000	0.000	0.000	0.000	0.000	0.000	0.000	0.000	0.000	0.000	0.000	0.000	0.000	156	635	6335	5858	0.531	Error	Error	3744	2591	0	0	3381	2477	0	0	0	0
2	1	6	""	"YKL105C"	6600	15430	140	4507	5197	3295	88	92	33	99	99	0	8507	9307	6000	264	274	76	99	98	0	0	0	0	0	0	0	0	0	0	0	0	0	0	0	0	0	0	0	0.536	0.565	0.544	0.601	2.458	0.535	0.851	0.000	0.000	0.000	0.000	0.000	0.000	0.000	0.000	0.000	0.000	0.000	0.000	0.000	0.000	156	728	12662	14152	-0.899	Error	Error	4419	8243	0	0	5109	9043	0	0	0	0
2	2	6	"PRI2"	"YKL045W"	6780	15420	130	5890	5590	1627	89	104	107	100	100	0	5248	5011	1347	270	290	200	100	99	0	0	0	0	0	0	0	0	0	0	0	0	0	0	0	0	0	0	0	1.165	1.160	1.182	1.148	1.527	1.161	0.896	0.000	0.000	0.000	0.000	0.000	0.000	0.000	0.000	0.000	0.000	0.000	0.000	0.000	0.000	120	529	10779	10242	0.221	Error	Error	5801	4978	0	0	5501	4741	0	0	0	0
2	3	6	""	"YKL076C"	6970	15430	130	3916	3643	1094	91	105	103	100	99	0	10969	10235	3170	275	297	193	100	99	0	0	0	0	0	0	0	0	0	0	0	0	0	0	0	0	0	0	0	0.358	0.357	0.356	0.358	1.494	0.329	0.871	0.000	0.000	0.000	0.000	0.000	0.000	0.000	0.000	0.000	0.000	0.000	0.000	0.000	0.000	120	593	14519	13512	-1.483	Error	Error	3825	10694	0	0	3552	9960	0	0	0	0
2	4	6	""	"YKL107W"	7170	15430	90	289	344	175	94	102	67	98	78	0	951	1031	465	283	289	86	96	94	0	0	0	0	0	0	0	0	0	0	0	0	0	0	0	0	0	0	0	0.292	0.334	0.300	0.321	1.949	0.283	0.586	0.000	0.000	0.000	0.000	0.000	0.000	0.000	0.000	0.000	0.000	0.000	0.000	0.000	0.000	52	377	863	998	-1.776	Error	Error	195	668	0	0	250	748	0	0	0	0
2	5	6	""	"YKL047W"	7350	15430	130	5854	5455	1663	93	101	62	100	100	0	9759	9196	2460	284	292	94	100	100	0	0	0	0	0	0	0	0	0	0	0	0	0	0	0	0	0	0	0	0.608	0.602	0.623	0.587	1.419	0.592	0.881	0.000	0.000	0.000	0.000	0.000	0.000	0.000	0.000	0.000	0.000	0.000	0.000	0.000	0.000	120	519	15236	14274	-0.718	Error	Error	5761	9475	0	0	5362	8912	0	0	0	0
2	6	6	""	"YKL078W"	7530	15430	140	5573	5744	2385	102	333	1429	94	92	0	8535	8089	3531	298	465	1017	94	92	0	0	0	0	0	0	0	0	0	0	0	0	0	0	0	0	0	0	0	0.664	0.724	0.712	0.742	1.945	0.693	0.873	0.000	0.000	0.000	0.000	0.000	0.000	0.000	0.000	0.000	0.000	0.000	0.000	0.000	0.000	156	504	13708	13433	-0.590	Error	Error	5471	8237	0	0	5642	7791	0	0	0	0
2	7	6	"HAP4"	"YKL109W"	7720	15430	140	4028	3777	1156	92	100	54	100	99	0	3169	2955	1025	277	308	311	95	93	0	0	0	0	0	0	0	0	0	0	0	0	0	0	0	0	0	0	0	1.361	1.376	1.349	1.392	1.718	1.355	0.842	0.000	0.000	0.000	0.000	0.000	0.000	0.000	0.000	0.000	0.000	0.000	0.000	0.000	0.000	156	491	6828	6363	0.445	Error	Error	3936	2892	0	0	3685	2678	0	0	0	0
2	8	6	"CSE4"	"YKL049C"	7910	15430	140	2924	2722	920	81	93	76	99	99	0	3358	3090	1152	268	310	304	93	92	0	0	0	0	0	0	0	0	0	0	0	0	0	0	0	0	0	0	0	0.920	0.936	0.947	1.007	2.326	0.897	0.854	0.000	0.000	0.000	0.000	0.000	0.000	0.000	0.000	0.000	0.000	0.000	0.000	0.000	0.000	156	542	5933	5463	-0.120	Error	Error	2843	3090	0	0	2641	2822	0	0	0	0
2	9	6	"VMA5"	"YKL080W"	8100	15430	140	2688	2455	777	79	133	596	94	87	0	3412	3168	1057	269	376	727	92	89	0	0	0	0	0	0	0	0	0	0	0	0	0	0	0	0	0	0	0	0.830	0.820	0.810	0.838	1.878	0.782	0.877	0.000	0.000	0.000	0.000	0.000	0.000	0.000	0.000	0.000	0.000	0.000	0.000	0.000	0.000	156	601	5752	5275	-0.269	Error	Error	2609	3143	0	0	2376	2899	0	0	0	0
2	10	6	""	"YKL111C"	8300	15430	120	363	376	145	81	89	64	95	89	0	1102	1076	407	269	293	265	90	79	0	0	0	0	0	0	0	0	0	0	0	0	0	0	0	0	0	0	0	0.339	0.366	0.360	0.365	1.935	0.312	0.696	0.000	0.000	0.000	0.000	0.000	0.000	0.000	0.000	0.000	0.000	0.000	0.000	0.000	0.000	120	514	1115	1102	-1.563	Error	Error	282	833	0	0	295	807	0	0	0	0
2	11	6	"snf7"	"YLR025W"	8490	15430	140	3063	3127	1395	83	97	77	100	99	0	3284	3230	1403	269	352	463	94	90	0	0	0	0	0	0	0	0	0	0	0	0	0	0	0	0	0	0	0	0.988	1.028	1.010	1.096	2.140	1.027	0.849	0.000	0.000	0.000	0.000	0.000	0.000	0.000	0.000	0.000	0.000	0.000	0.000	0.000	0.000	156	508	5995	6005	-0.017	Error	Error	2980	3015	0	0	3044	2961	0	0	0	0
2	12	6	"ERG3"	"YLR056W"	8680	15430	140	3206	2957	1146	84	94	52	100	100	0	3058	2819	1121	266	321	251	92	91	0	0	0	0	0	0	0	0	0	0	0	0	0	0	0	0	0	0	0	1.118	1.125	1.117	1.133	1.956	1.120	0.838	0.000	0.000	0.000	0.000	0.000	0.000	0.000	0.000	0.000	0.000	0.000	0.000	0.000	0.000	156	472	5914	5426	0.161	Error	Error	3122	2792	0	0	2873	2553	0	0	0	0
2	13	6	"GAA1"	"YLR088W"	8860	15420	130	3394	3347	1256	86	97	114	99	95	0	4829	4797	1863	262	285	275	96	95	0	0	0	0	0	0	0	0	0	0	0	0	0	0	0	0	0	0	0	0.724	0.719	0.704	0.720	1.854	0.683	0.840	0.000	0.000	0.000	0.000	0.000	0.000	0.000	0.000	0.000	0.000	0.000	0.000	0.000	0.000	120	470	7875	7796	-0.465	Error	Error	3308	4567	0	0	3261	4535	0	0	0	0
2	14	6	"AAT2"	"YLR027C"	9060	15430	140	2657	2469	970	84	129	318	96	92	0	2711	2497	1024	263	330	550	91	87	0	0	0	0	0	0	0	0	0	0	0	0	0	0	0	0	0	0	0	1.051	1.068	1.079	1.033	1.767	1.018	0.830	0.000	0.000	0.000	0.000	0.000	0.000	0.000	0.000	0.000	0.000	0.000	0.000	0.000	0.000	156	617	5021	4619	0.072	Error	Error	2573	2448	0	0	2385	2234	0	0	0	0
2	15	6	"SHM2"	"YLR058C"	9260	15430	130	2565	2520	1138	81	102	159	97	96	0	6322	6060	2620	263	308	655	97	93	0	0	0	0	0	0	0	0	0	0	0	0	0	0	0	0	0	0	0	0.410	0.421	0.422	0.407	1.627	0.389	0.824	0.000	0.000	0.000	0.000	0.000	0.000	0.000	0.000	0.000	0.000	0.000	0.000	0.000	0.000	120	525	8543	8236	-1.286	Error	Error	2484	6059	0	0	2439	5797	0	0	0	0
2	16	6	"XDJ1"	"YLR090W"	9450	15430	140	3479	3311	1442	80	93	131	98	97	0	4950	4552	2025	260	280	192	95	94	0	0	0	0	0	0	0	0	0	0	0	0	0	0	0	0	0	0	0	0.725	0.753	0.732	0.767	2.087	0.723	0.843	0.000	0.000	0.000	0.000	0.000	0.000	0.000	0.000	0.000	0.000	0.000	0.000	0.000	0.000	156	552	8089	7523	-0.464	Error	Error	3399	4690	0	0	3231	4292	0	0	0	0
2	17	6	"RPL15A"	"YLR029C"	9620	15430	130	2188	2003	815	80	85	34	100	98	0	2110	1968	797	264	270	82	95	92	0	0	0	0	0	0	0	0	0	0	0	0	0	0	0	0	0	0	0	1.142	1.129	1.089	1.168	2.046	1.075	0.852	0.000	0.000	0.000	0.000	0.000	0.000	0.000	0.000	0.000	0.000	0.000	0.000	0.000	0.000	120	514	3954	3627	0.191	Error	Error	2108	1846	0	0	1923	1704	0	0	0	0
2	18	6	"FRS1"	"YLR060W"	9820	15430	130	2611	2607	1210	79	88	57	100	98	0	2225	2180	939	261	278	153	95	90	0	0	0	0	0	0	0	0	0	0	0	0	0	0	0	0	0	0	0	1.289	1.317	1.282	1.319	1.694	1.309	0.835	0.000	0.000	0.000	0.000	0.000	0.000	0.000	0.000	0.000	0.000	0.000	0.000	0.000	0.000	120	530	4496	4447	0.366	Error	Error	2532	1964	0	0	2528	1919	0	0	0	0
2	19	6	"SUL2"	"YLR092W"	10020	15420	130	3071	3092	1229	74	86	83	100	100	0	4797	4968	1959	255	287	244	100	100	0	0	0	0	0	0	0	0	0	0	0	0	0	0	0	0	0	0	0	0.660	0.640	0.629	0.646	1.470	0.607	0.876	0.000	0.000	0.000	0.000	0.000	0.000	0.000	0.000	0.000	0.000	0.000	0.000	0.000	0.000	120	544	7539	7731	-0.600	Error	Error	2997	4542	0	0	3018	4713	0	0	0	0
2	20	6	""	"YLR031W"	10210	15430	140	1801	1702	503	72	80	68	99	99	0	1515	1433	506	253	271	174	92	89	0	0	0	0	0	0	0	0	0	0	0	0	0	0	0	0	0	0	0	1.370	1.381	1.345	1.467	1.810	1.322	0.825	0.000	0.000	0.000	0.000	0.000	0.000	0.000	0.000	0.000	0.000	0.000	0.000	0.000	0.000	156	599	2991	2810	0.454	Error	Error	1729	1262	0	0	1630	1180	0	0	0	0
2	21	6	""	"YLR062C"	10410	15430	130	804	768	257	72	75	26	100	98	0	1366	1336	430	248	256	81	97	94	0	0	0	0	0	0	0	0	0	0	0	0	0	0	0	0	0	0	0	0.655	0.640	0.641	0.638	1.580	0.575	0.781	0.000	0.000	0.000	0.000	0.000	0.000	0.000	0.000	0.000	0.000	0.000	0.000	0.000	0.000	120	508	1850	1784	-0.611	Error	Error	732	1118	0	0	696	1088	0	0	0	0
2	22	6	"GIS3"	"YLR094C"	10590	15430	130	1880	1881	930	76	79	27	100	100	0	1860	1763	826	248	252	71	91	90	0	0	0	0	0	0	0	0	0	0	0	0	0	0	0	0	0	0	0	1.119	1.191	1.217	1.248	2.028	1.165	0.835	0.000	0.000	0.000	0.000	0.000	0.000	0.000	0.000	0.000	0.000	0.000	0.000	0.000	0.000	120	625	3416	3320	0.162	Error	Error	1804	1612	0	0	1805	1515	0	0	0	0
2	1	7	""	"YLR400W"	6600	15620	120	3942	3602	1568	86	89	32	100	100	0	2719	2428	1036	259	269	81	97	95	0	0	0	0	0	0	0	0	0	0	0	0	0	0	0	0	0	0	0	1.567	1.621	1.599	1.671	1.833	1.625	0.847	0.000	0.000	0.000	0.000	0.000	0.000	0.000	0.000	0.000	0.000	0.000	0.000	0.000	0.000	120	615	6316	5685	0.648	Error	Error	3856	2460	0	0	3516	2169	0	0	0	0
2	2	7	"sen1"	"YLR430W"	6810	15620	80	206	241	119	98	117	227	15	1	0	509	535	220	279	287	95	82	63	0	0	0	0	0	0	0	0	0	0	0	0	0	0	0	0	0	0	0	0.470	0.559	0.428	0.416	2.487	0.373	0.384	0.000	0.000	0.000	0.000	0.000	0.000	0.000	0.000	0.000	0.000	0.000	0.000	0.000	0.000	52	329	338	399	-1.091	Error	Error	108	230	0	0	143	256	0	0	0	0
2	3	7	"PAU4"	"YLR461W"	6990	15600	100	10480	10017	5326	99	256	786	91	90	0	15295	14141	7493	287	465	1092	92	88	0	0	0	0	0	0	0	0	0	0	0	0	0	0	0	0	0	0	0	0.692	0.716	0.728	0.732	2.504	0.697	0.859	0.000	0.000	0.000	0.000	0.000	0.000	0.000	0.000	0.000	0.000	0.000	0.000	0.000	0.000	80	448	25389	23772	-0.532	Error	Error	10381	15008	0	0	9918	13854	0	0	0	0
2	4	7	""	"YLR402W"	7170	15630	100	3816	3238	1404	93	192	583	95	87	0	2362	2275	923	278	420	975	83	56	0	0	0	0	0	0	0	0	0	0	0	0	0	0	0	0	0	0	0	1.786	1.575	1.625	1.595	1.930	1.577	0.790	0.000	0.000	0.000	0.000	0.000	0.000	0.000	0.000	0.000	0.000	0.000	0.000	0.000	0.000	80	462	5807	5142	0.837	Error	Error	3723	2084	0	0	3145	1997	0	0	0	0
2	5	7	""	"YLR432W"	7380	15620	130	10648	10166	5187	94	340	1384	95	87	0	15392	15011	6761	277	440	953	100	99	0	0	0	0	0	0	0	0	0	0	0	0	0	0	0	0	0	0	0	0.698	0.684	0.692	0.641	1.679	0.686	0.826	0.000	0.000	0.000	0.000	0.000	0.000	0.000	0.000	0.000	0.000	0.000	0.000	0.000	0.000	120	611	25669	24806	-0.518	Error	Error	10554	15115	0	0	10072	14734	0	0	0	0
2	6	7	""	"YLR463C"	7570	15630	110	17275	14328	5915	97	410	1619	97	91	0	13563	12113	4561	290	486	1096	100	95	0	0	0	0	0	0	0	0	0	0	0	0	0	0	0	0	0	0	0	1.294	1.204	1.198	1.158	1.542	1.207	0.890	0.000	0.000	0.000	0.000	0.000	0.000	0.000	0.000	0.000	0.000	0.000	0.000	0.000	0.000	80	435	30451	26054	0.372	Error	Error	17178	13273	0	0	14231	11823	0	0	0	0
2	7	7	""	"YLR404W"	7740	15620	120	3206	2979	1325	92	102	59	100	100	0	4950	4464	2096	286	304	123	96	95	0	0	0	0	0	0	0	0	0	0	0	0	0	0	0	0	0	0	0	0.668	0.691	0.708	0.761	2.109	0.633	0.861	0.000	0.000	0.000	0.000	0.000	0.000	0.000	0.000	0.000	0.000	0.000	0.000	0.000	0.000	120	500	7778	7065	-0.583	Error	Error	3114	4664	0	0	2887	4178	0	0	0	0
2	8	7	""	"YLR434C"	7940	15630	100	2265	1982	733	85	104	105	98	95	0	3569	3309	1263	281	349	389	95	91	0	0	0	0	0	0	0	0	0	0	0	0	0	0	0	0	0	0	0	0.663	0.626	0.647	0.642	2.064	0.570	0.802	0.000	0.000	0.000	0.000	0.000	0.000	0.000	0.000	0.000	0.000	0.000	0.000	0.000	0.000	80	449	5468	4925	-0.593	Error	Error	2180	3288	0	0	1897	3028	0	0	0	0
2	9	7	""	"YLR465C"	8120	15630	110	11172	9725	4165	82	234	1055	97	93	0	8959	8526	3428	264	469	1149	96	93	0	0	0	0	0	0	0	0	0	0	0	0	0	0	0	0	0	0	0	1.275	1.167	1.158	1.188	1.733	1.197	0.906	0.000	0.000	0.000	0.000	0.000	0.000	0.000	0.000	0.000	0.000	0.000	0.000	0.000	0.000	80	487	19785	17905	0.351	Error	Error	11090	8695	0	0	9643	8262	0	0	0	0
2	10	7	"RPL31B"	"YLR406C"	8330	15630	100	424	449	202	79	220	1090	0	0	0	789	862	424	267	431	1142	8	1	0	0	0	0	0	0	0	0	0	0	0	0	0	0	0	0	0	0	0	0.661	0.622	0.653	0.667	1.640	0.036	0.043	0.000	0.000	0.000	0.000	0.000	0.000	0.000	0.000	0.000	0.000	0.000	0.000	0.000	0.000	80	447	867	965	-0.597	Error	Error	345	522	0	0	370	595	0	0	0	0
2	11	7	"ECM30"	"YLR436C"	8520	15620	140	2504	2695	1671	80	88	47	100	98	0	3353	3394	1975	267	278	128	96	91	0	0	0	0	0	0	0	0	0	0	0	0	0	0	0	0	0	0	0	0.785	0.836	0.819	0.903	2.262	0.825	0.839	0.000	0.000	0.000	0.000	0.000	0.000	0.000	0.000	0.000	0.000	0.000	0.000	0.000	0.000	156	547	5510	5742	-0.348	Error	Error	2424	3086	0	0	2615	3127	0	0	0	0
2	12	7	"YRF1-5"	"YLR467W"	8700	15630	120	7543	7001	4962	79	82	31	100	100	0	7154	7395	5719	263	266	77	95	93	0	0	0	0	0	0	0	0	0	0	0	0	0	0	0	0	0	0	0	1.083	0.971	0.919	1.137	2.579	0.927	0.863	0.000	0.000	0.000	0.000	0.000	0.000	0.000	0.000	0.000	0.000	0.000	0.000	0.000	0.000	120	462	14355	14054	0.115	Error	Error	7464	6891	0	0	6922	7132	0	0	0	0
2	13	7	""	"YMR160W"	8890	15620	130	5146	5172	1874	81	92	104	100	100	0	5405	5521	1849	259	278	238	99	99	0	0	0	0	0	0	0	0	0	0	0	0	0	0	0	0	0	0	0	0.984	0.968	1.000	0.972	1.562	0.965	0.897	0.000	0.000	0.000	0.000	0.000	0.000	0.000	0.000	0.000	0.000	0.000	0.000	0.000	0.000	120	588	10211	10353	-0.023	Error	Error	5065	5146	0	0	5091	5262	0	0	0	0
2	14	7	"SGS1"	"YMR190C"	9090	15630	110	242	260	117	81	85	34	93	83	0	548	583	248	259	271	79	86	81	0	0	0	0	0	0	0	0	0	0	0	0	0	0	0	0	0	0	0	0.557	0.552	0.526	0.498	2.265	0.365	0.458	0.000	0.000	0.000	0.000	0.000	0.000	0.000	0.000	0.000	0.000	0.000	0.000	0.000	0.000	80	460	450	503	-0.844	Error	Error	161	289	0	0	179	324	0	0	0	0
2	15	7	"ERG8"	"YMR220W"	9270	15620	130	4584	4251	1712	80	86	52	100	100	0	8616	8054	3428	258	304	624	95	95	0	0	0	0	0	0	0	0	0	0	0	0	0	0	0	0	0	0	0	0.539	0.535	0.532	0.576	2.026	0.493	0.840	0.000	0.000	0.000	0.000	0.000	0.000	0.000	0.000	0.000	0.000	0.000	0.000	0.000	0.000	120	561	12862	11967	-0.892	Error	Error	4504	8358	0	0	4171	7796	0	0	0	0
2	16	7	""	"YMR162C"	9470	15630	130	230	240	90	79	86	54	88	74	0	647	641	219	260	275	163	88	61	0	0	0	0	0	0	0	0	0	0	0	0	0	0	0	0	0	0	0	0.390	0.423	0.407	0.415	2.197	0.280	0.484	0.000	0.000	0.000	0.000	0.000	0.000	0.000	0.000	0.000	0.000	0.000	0.000	0.000	0.000	120	496	538	542	-1.358	Error	Error	151	387	0	0	161	381	0	0	0	0
2	17	7	""	"YMR192W"	9660	15630	130	3479	3591	1450	80	84	45	100	100	0	4489	4353	1816	267	272	111	99	98	0	0	0	0	0	0	0	0	0	0	0	0	0	0	0	0	0	0	0	0.805	0.859	0.845	0.907	1.726	0.820	0.864	0.000	0.000	0.000	0.000	0.000	0.000	0.000	0.000	0.000	0.000	0.000	0.000	0.000	0.000	120	466	7621	7597	-0.313	Error	Error	3399	4222	0	0	3511	4086	0	0	0	0
2	18	7	""	"YMR222C"	9820	15620	150	102	113	69	79	88	73	18	3	0	279	315	169	266	286	171	13	3	0	0	0	0	0	0	0	0	0	0	0	0	0	0	0	0	0	0	0	1.769	0.694	0.452	0.443	4.002	0.238	0.275	0.000	0.000	0.000	0.000	0.000	0.000	0.000	0.000	0.000	0.000	0.000	0.000	0.000	0.000	156	615	36	83	0.823	Error	Error	23	13	0	0	34	49	0	0	-50	0
2	19	7	"MSS11"	"YMR164C"	10040	15630	120	180	188	65	73	80	47	86	57	0	429	459	161	256	266	87	78	49	0	0	0	0	0	0	0	0	0	0	0	0	0	0	0	0	0	0	0	0.618	0.567	0.596	0.590	2.641	0.330	0.263	0.000	0.000	0.000	0.000	0.000	0.000	0.000	0.000	0.000	0.000	0.000	0.000	0.000	0.000	120	548	280	318	-0.693	Error	Error	107	173	0	0	115	203	0	0	0	0
2	20	7	"MRPL24"	"YMR193W"	10240	15630	130	2092	2007	626	73	83	57	100	99	0	2311	2222	666	257	266	89	98	98	0	0	0	0	0	0	0	0	0	0	0	0	0	0	0	0	0	0	0	0.983	0.984	0.965	0.991	1.430	0.954	0.855	0.000	0.000	0.000	0.000	0.000	0.000	0.000	0.000	0.000	0.000	0.000	0.000	0.000	0.000	120	511	4073	3899	-0.025	Error	Error	2019	2054	0	0	1934	1965	0	0	0	0
2	21	7	"MRE11"	"YMR224C"	10420	15630	130	395	403	177	78	85	44	95	91	0	895	925	404	253	265	92	93	89	0	0	0	0	0	0	0	0	0	0	0	0	0	0	0	0	0	0	0	0.494	0.484	0.483	0.488	1.760	0.398	0.677	0.000	0.000	0.000	0.000	0.000	0.000	0.000	0.000	0.000	0.000	0.000	0.000	0.000	0.000	120	523	959	997	-1.018	Error	Error	317	642	0	0	325	672	0	0	0	0
2	22	7	""	"YMR166C"	10610	15630	130	3229	3006	973	82	87	31	100	100	0	2647	2575	790	260	264	74	100	100	0	0	0	0	0	0	0	0	0	0	0	0	0	0	0	0	0	0	0	1.318	1.263	1.248	1.271	1.404	1.258	0.851	0.000	0.000	0.000	0.000	0.000	0.000	0.000	0.000	0.000	0.000	0.000	0.000	0.000	0.000	120	639	5534	5239	0.399	Error	Error	3147	2387	0	0	2924	2315	0	0	0	0
2	1	8	"RPL36A"	"YMR194W"	6620	15810	130	3613	3436	1300	81	88	58	100	100	0	3835	3694	1434	265	274	94	98	98	0	0	0	0	0	0	0	0	0	0	0	0	0	0	0	0	0	0	0	0.989	0.978	0.946	0.981	1.578	0.949	0.888	0.000	0.000	0.000	0.000	0.000	0.000	0.000	0.000	0.000	0.000	0.000	0.000	0.000	0.000	120	640	7102	6784	-0.015	Error	Error	3532	3570	0	0	3355	3429	0	0	0	0
2	2	8	""	"YMR226C"	6810	15810	130	4620	4271	1921	95	98	44	100	99	0	5828	5242	2425	276	286	99	95	95	0	0	0	0	0	0	0	0	0	0	0	0	0	0	0	0	0	0	0	0.815	0.841	0.847	0.884	2.007	0.818	0.868	0.000	0.000	0.000	0.000	0.000	0.000	0.000	0.000	0.000	0.000	0.000	0.000	0.000	0.000	120	628	10077	9142	-0.295	Error	Error	4525	5552	0	0	4176	4966	0	0	0	0
2	3	8	""	"YNL207W"	7020	15820	100	182	203	88	96	121	234	12	0	0	434	504	236	274	306	297	32	8	0	0	0	0	0	0	0	0	0	0	0	0	0	0	0	0	0	0	0	0.538	0.465	0.440	0.486	2.725	0.311	0.456	0.000	0.000	0.000	0.000	0.000	0.000	0.000	0.000	0.000	0.000	0.000	0.000	0.000	0.000	80	421	246	337	-0.896	Error	Error	86	160	0	0	107	230	0	0	0	0
2	4	8	"lap3"	"YNL239W"	7190	15810	130	3910	3682	1243	85	99	121	100	100	0	3371	3288	997	269	284	157	99	99	0	0	0	0	0	0	0	0	0	0	0	0	0	0	0	0	0	0	0	1.233	1.191	1.194	1.199	1.457	1.193	0.891	0.000	0.000	0.000	0.000	0.000	0.000	0.000	0.000	0.000	0.000	0.000	0.000	0.000	0.000	120	539	6927	6616	0.302	Error	Error	3825	3102	0	0	3597	3019	0	0	0	0
2	5	8	"bni1"	"YNL271C"	7390	15820	130	314	323	121	83	89	43	94	89	0	591	594	231	258	278	206	69	34	0	0	0	0	0	0	0	0	0	0	0	0	0	0	0	0	0	0	0	0.694	0.714	0.679	0.752	2.146	0.546	0.572	0.000	0.000	0.000	0.000	0.000	0.000	0.000	0.000	0.000	0.000	0.000	0.000	0.000	0.000	120	538	564	576	-0.528	Error	Error	231	333	0	0	240	336	0	0	0	0
2	6	8	"SSB2"	"YNL209W"	7580	15820	130	4711	4525	1965	82	106	288	98	96	0	6290	5833	2328	257	266	77	99	99	0	0	0	0	0	0	0	0	0	0	0	0	0	0	0	0	0	0	0	0.767	0.797	0.778	0.816	1.909	0.777	0.865	0.000	0.000	0.000	0.000	0.000	0.000	0.000	0.000	0.000	0.000	0.000	0.000	0.000	0.000	120	485	10662	10019	-0.382	Error	Error	4629	6033	0	0	4443	5576	0	0	0	0
2	7	8	"zwf1"	"YNL241C"	7760	15810	130	3246	3058	1028	83	89	38	100	100	0	6344	5951	1863	264	282	97	100	100	0	0	0	0	0	0	0	0	0	0	0	0	0	0	0	0	0	0	0	0.520	0.523	0.531	0.517	1.358	0.507	0.910	0.000	0.000	0.000	0.000	0.000	0.000	0.000	0.000	0.000	0.000	0.000	0.000	0.000	0.000	120	577	9243	8662	-0.943	Error	Error	3163	6080	0	0	2975	5687	0	0	0	0
2	8	8	"TOF1"	"YNL273W"	7960	15820	110	478	481	191	83	88	37	98	97	0	1048	1062	452	263	281	93	93	92	0	0	0	0	0	0	0	0	0	0	0	0	0	0	0	0	0	0	0	0.503	0.498	0.462	0.515	2.257	0.477	0.633	0.000	0.000	0.000	0.000	0.000	0.000	0.000	0.000	0.000	0.000	0.000	0.000	0.000	0.000	80	473	1180	1197	-0.991	Error	Error	395	785	0	0	398	799	0	0	0	0
2	9	8	""	"YNL211C"	8130	15810	130	1734	1589	542	81	143	645	88	71	0	3714	3493	1287	262	341	717	95	89	0	0	0	0	0	0	0	0	0	0	0	0	0	0	0	0	0	0	0	0.479	0.467	0.479	0.484	1.638	0.442	0.897	0.000	0.000	0.000	0.000	0.000	0.000	0.000	0.000	0.000	0.000	0.000	0.000	0.000	0.000	120	541	5105	4739	-1.062	Error	Error	1653	3452	0	0	1508	3231	0	0	0	0
2	10	8	"SLA2"	"YNL243W"	8320	15820	130	2518	2947	1810	83	91	56	100	100	0	2446	2613	1366	268	289	187	98	95	0	0	0	0	0	0	0	0	0	0	0	0	0	0	0	0	0	0	0	1.118	1.221	1.181	1.194	1.585	1.258	0.831	0.000	0.000	0.000	0.000	0.000	0.000	0.000	0.000	0.000	0.000	0.000	0.000	0.000	0.000	120	554	4613	5209	0.161	Error	Error	2435	2178	0	0	2864	2345	0	0	0	0
2	11	8	""	"YNL275W"	8520	15810	130	4314	4033	1258	85	92	49	100	100	0	6163	5689	1666	267	276	128	100	100	0	0	0	0	0	0	0	0	0	0	0	0	0	0	0	0	0	0	0	0.717	0.728	0.725	0.729	1.396	0.725	0.900	0.000	0.000	0.000	0.000	0.000	0.000	0.000	0.000	0.000	0.000	0.000	0.000	0.000	0.000	120	556	10125	9370	-0.479	Error	Error	4229	5896	0	0	3948	5422	0	0	0	0
2	12	8	""	"YNL213C"	8710	15820	130	2264	2143	707	80	85	41	100	100	0	3129	2945	1047	251	267	120	98	97	0	0	0	0	0	0	0	0	0	0	0	0	0	0	0	0	0	0	0	0.759	0.766	0.767	0.796	1.666	0.733	0.890	0.000	0.000	0.000	0.000	0.000	0.000	0.000	0.000	0.000	0.000	0.000	0.000	0.000	0.000	120	491	5062	4757	-0.398	Error	Error	2184	2878	0	0	2063	2694	0	0	0	0
2	13	8	""	"YNL245C"	8890	15810	130	1724	1639	613	78	81	35	100	99	0	2007	1952	715	255	262	77	99	96	0	0	0	0	0	0	0	0	0	0	0	0	0	0	0	0	0	0	0	0.939	0.920	0.901	0.925	1.663	0.893	0.854	0.000	0.000	0.000	0.000	0.000	0.000	0.000	0.000	0.000	0.000	0.000	0.000	0.000	0.000	120	514	3398	3258	-0.090	Error	Error	1646	1752	0	0	1561	1697	0	0	0	0
2	14	8	"met2"	"YNL277W"	9090	15820	130	2938	2927	1342	80	85	37	100	100	0	3639	3627	1734	266	283	179	93	91	0	0	0	0	0	0	0	0	0	0	0	0	0	0	0	0	0	0	0	0.847	0.847	0.813	0.895	1.767	0.816	0.883	0.000	0.000	0.000	0.000	0.000	0.000	0.000	0.000	0.000	0.000	0.000	0.000	0.000	0.000	120	550	6231	6208	-0.239	Error	Error	2858	3373	0	0	2847	3361	0	0	0	0
2	15	8	"ALG6"	"YOR002W"	9270	15810	130	3665	3422	1195	84	91	58	100	100	0	4793	4595	1457	260	280	144	100	100	0	0	0	0	0	0	0	0	0	0	0	0	0	0	0	0	0	0	0	0.790	0.770	0.776	0.765	1.364	0.752	0.900	0.000	0.000	0.000	0.000	0.000	0.000	0.000	0.000	0.000	0.000	0.000	0.000	0.000	0.000	120	503	8114	7673	-0.340	Error	Error	3581	4533	0	0	3338	4335	0	0	0	0
2	16	8	"DHS1"	"YOR033C"	9460	15810	140	3573	3550	1569	84	91	57	99	99	0	7919	7678	3202	256	275	155	97	96	0	0	0	0	0	0	0	0	0	0	0	0	0	0	0	0	0	0	0	0.455	0.467	0.472	0.471	1.747	0.455	0.905	0.000	0.000	0.000	0.000	0.000	0.000	0.000	0.000	0.000	0.000	0.000	0.000	0.000	0.000	156	510	11152	10888	-1.135	Error	Error	3489	7663	0	0	3466	7422	0	0	0	0
2	17	8	"CYT1"	"YOR065W"	9640	15810	130	2356	2232	875	83	99	151	99	95	0	2514	2436	1019	256	284	220	92	90	0	0	0	0	0	0	0	0	0	0	0	0	0	0	0	0	0	0	0	1.007	0.986	0.933	1.008	1.784	0.938	0.860	0.000	0.000	0.000	0.000	0.000	0.000	0.000	0.000	0.000	0.000	0.000	0.000	0.000	0.000	120	498	4531	4329	0.010	Error	Error	2273	2258	0	0	2149	2180	0	0	0	0
2	18	8	""	"YOR004W"	9840	15810	130	2215	1989	718	79	97	148	99	95	0	7730	7420	2759	262	287	219	99	96	0	0	0	0	0	0	0	0	0	0	0	0	0	0	0	0	0	0	0	0.286	0.267	0.266	0.277	1.659	0.257	0.903	0.000	0.000	0.000	0.000	0.000	0.000	0.000	0.000	0.000	0.000	0.000	0.000	0.000	0.000	120	518	9604	9068	-1.806	Error	Error	2136	7468	0	0	1910	7158	0	0	0	0
2	19	8	"SHE4"	"YOR035C"	10020	15810	130	2765	2784	1321	80	85	36	100	100	0	2443	2462	1049	258	265	91	96	96	0	0	0	0	0	0	0	0	0	0	0	0	0	0	0	0	0	0	0	1.229	1.227	1.243	1.279	1.689	1.227	0.877	0.000	0.000	0.000	0.000	0.000	0.000	0.000	0.000	0.000	0.000	0.000	0.000	0.000	0.000	120	498	4870	4908	0.297	Error	Error	2685	2185	0	0	2704	2204	0	0	0	0
2	20	8	"alg8"	"YOR067C"	10210	15810	130	3074	3165	1319	86	94	52	100	100	0	6299	6012	2258	265	277	108	100	100	0	0	0	0	0	0	0	0	0	0	0	0	0	0	0	0	0	0	0	0.495	0.536	0.541	0.532	1.439	0.521	0.892	0.000	0.000	0.000	0.000	0.000	0.000	0.000	0.000	0.000	0.000	0.000	0.000	0.000	0.000	120	509	9022	8826	-1.014	Error	Error	2988	6034	0	0	3079	5747	0	0	0	0
2	21	8	""	"YOR006C"	10400	15810	130	3022	2824	919	93	101	59	100	100	0	3614	3435	1031	272	290	142	99	98	0	0	0	0	0	0	0	0	0	0	0	0	0	0	0	0	0	0	0	0.876	0.863	0.875	0.872	1.467	0.855	0.904	0.000	0.000	0.000	0.000	0.000	0.000	0.000	0.000	0.000	0.000	0.000	0.000	0.000	0.000	120	527	6271	5894	-0.190	Error	Error	2929	3342	0	0	2731	3163	0	0	0	0
2	22	8	"cyc2"	"YOR037W"	10600	15810	130	3290	3250	1254	88	95	47	100	100	0	5161	5058	1901	269	283	119	100	100	0	0	0	0	0	0	0	0	0	0	0	0	0	0	0	0	0	0	0	0.655	0.660	0.670	0.656	1.453	0.645	0.898	0.000	0.000	0.000	0.000	0.000	0.000	0.000	0.000	0.000	0.000	0.000	0.000	0.000	0.000	120	690	8094	7951	-0.611	Error	Error	3202	4892	0	0	3162	4789	0	0	0	0
2	1	9	"VPS5"	"YOR069W"	6630	16000	130	4072	3637	1569	82	93	86	98	97	0	12749	11753	4625	271	279	95	100	100	0	0	0	0	0	0	0	0	0	0	0	0	0	0	0	0	0	0	0	0.320	0.310	0.310	0.300	1.780	0.297	0.862	0.000	0.000	0.000	0.000	0.000	0.000	0.000	0.000	0.000	0.000	0.000	0.000	0.000	0.000	120	585	16468	15037	-1.645	Error	Error	3990	12478	0	0	3555	11482	0	0	0	0
2	2	9	"SLG1"	"YOR008C"	6790	16000	130	6107	5787	2464	95	102	65	100	100	0	6561	5992	2373	271	288	116	100	99	0	0	0	0	0	0	0	0	0	0	0	0	0	0	0	0	0	0	0	0.956	0.995	1.025	0.974	1.585	0.994	0.895	0.000	0.000	0.000	0.000	0.000	0.000	0.000	0.000	0.000	0.000	0.000	0.000	0.000	0.000	120	491	12302	11413	-0.065	Error	Error	6012	6290	0	0	5692	5721	0	0	0	0
2	3	9	"CKB2"	"YOR039W"	6990	16000	140	4675	3968	1766	99	103	57	98	97	0	4464	4035	1732	272	287	105	96	93	0	0	0	0	0	0	0	0	0	0	0	0	0	0	0	0	0	0	0	1.092	1.028	1.018	0.988	2.130	1.036	0.856	0.000	0.000	0.000	0.000	0.000	0.000	0.000	0.000	0.000	0.000	0.000	0.000	0.000	0.000	156	544	8768	7632	0.126	Error	Error	4576	4192	0	0	3869	3763	0	0	0	0
2	4	9	""	"YOR071C"	7170	16000	140	4722	4677	2634	97	100	39	98	98	0	6148	5978	3446	286	301	120	94	92	0	0	0	0	0	0	0	0	0	0	0	0	0	0	0	0	0	0	0	0.789	0.805	0.750	0.843	2.372	0.769	0.853	0.000	0.000	0.000	0.000	0.000	0.000	0.000	0.000	0.000	0.000	0.000	0.000	0.000	0.000	156	464	10487	10272	-0.342	Error	Error	4625	5862	0	0	4580	5692	0	0	0	0
2	5	9	"ATF1"	"YOR377W"	7350	16000	130	5735	5297	1705	95	102	52	100	100	0	9483	9179	2591	287	321	257	100	100	0	0	0	0	0	0	0	0	0	0	0	0	0	0	0	0	0	0	0	0.613	0.585	0.599	0.569	1.431	0.560	0.865	0.000	0.000	0.000	0.000	0.000	0.000	0.000	0.000	0.000	0.000	0.000	0.000	0.000	0.000	120	469	14836	14094	-0.705	Error	Error	5640	9196	0	0	5202	8892	0	0	0	0
2	6	9	"HST2"	"YPL015C"	7550	16000	140	4481	4260	1587	87	94	48	99	98	0	5879	5768	1721	273	298	238	99	98	0	0	0	0	0	0	0	0	0	0	0	0	0	0	0	0	0	0	0	0.784	0.759	0.792	0.721	1.605	0.778	0.884	0.000	0.000	0.000	0.000	0.000	0.000	0.000	0.000	0.000	0.000	0.000	0.000	0.000	0.000	156	500	10000	9668	-0.351	Error	Error	4394	5606	0	0	4173	5495	0	0	0	0
2	7	9	""	"YPL047W"	7730	16000	130	1849	1662	617	85	91	39	100	100	0	1769	1696	511	263	274	86	98	96	0	0	0	0	0	0	0	0	0	0	0	0	0	0	0	0	0	0	0	1.171	1.100	1.107	1.115	1.697	1.102	0.866	0.000	0.000	0.000	0.000	0.000	0.000	0.000	0.000	0.000	0.000	0.000	0.000	0.000	0.000	120	505	3270	3010	0.228	Error	Error	1764	1506	0	0	1577	1433	0	0	0	0
2	8	9	""	"YOR379C"	7930	16010	110	291	291	95	84	90	39	98	91	0	569	615	262	262	277	88	86	76	0	0	0	0	0	0	0	0	0	0	0	0	0	0	0	0	0	0	0	0.674	0.586	0.682	0.724	2.822	0.381	0.409	0.000	0.000	0.000	0.000	0.000	0.000	0.000	0.000	0.000	0.000	0.000	0.000	0.000	0.000	80	449	514	560	-0.569	Error	Error	207	307	0	0	207	353	0	0	0	0
2	9	9	""	"YPL017C"	8100	16000	130	3735	3499	1189	77	85	56	100	100	0	3156	3070	992	258	320	1046	92	80	0	0	0	0	0	0	0	0	0	0	0	0	0	0	0	0	0	0	0	1.262	1.217	1.211	1.220	1.448	0.940	0.538	0.000	0.000	0.000	0.000	0.000	0.000	0.000	0.000	0.000	0.000	0.000	0.000	0.000	0.000	120	526	6556	6234	0.336	Error	Error	3658	2898	0	0	3422	2812	0	0	0	0
2	10	9	"DIG1"	"YPL049C"	8300	16000	140	3309	3200	1407	80	88	57	100	99	0	2751	2715	1172	258	318	972	91	68	0	0	0	0	0	0	0	0	0	0	0	0	0	0	0	0	0	0	0	1.295	1.270	1.243	1.327	2.213	0.992	0.491	0.000	0.000	0.000	0.000	0.000	0.000	0.000	0.000	0.000	0.000	0.000	0.000	0.000	0.000	156	617	5722	5577	0.373	Error	Error	3229	2493	0	0	3120	2457	0	0	0	0
2	11	9	"FRE3"	"YOR381W"	8490	16010	100	337	367	173	83	88	33	100	97	0	655	718	315	259	270	76	100	93	0	0	0	0	0	0	0	0	0	0	0	0	0	0	0	0	0	0	0	0.641	0.619	0.617	0.614	1.774	0.420	0.501	0.000	0.000	0.000	0.000	0.000	0.000	0.000	0.000	0.000	0.000	0.000	0.000	0.000	0.000	80	406	650	743	-0.641	Error	Error	254	396	0	0	284	459	0	0	0	0
2	12	9	""	"YPL019C"	8670	16000	130	2781	2994	1465	81	88	59	100	100	0	2843	2947	1299	259	277	139	100	100	0	0	0	0	0	0	0	0	0	0	0	0	0	0	0	0	0	0	0	1.045	1.084	1.107	1.074	1.467	1.100	0.858	0.000	0.000	0.000	0.000	0.000	0.000	0.000	0.000	0.000	0.000	0.000	0.000	0.000	0.000	120	538	5284	5601	0.063	Error	Error	2700	2584	0	0	2913	2688	0	0	0	0
2	13	9	"ARL3"	"YPL051W"	8870	16000	140	1992	1860	907	82	89	60	96	95	0	5333	4938	2565	268	284	137	94	91	0	0	0	0	0	0	0	0	0	0	0	0	0	0	0	0	0	0	0	0.377	0.381	0.380	0.413	2.084	0.349	0.854	0.000	0.000	0.000	0.000	0.000	0.000	0.000	0.000	0.000	0.000	0.000	0.000	0.000	0.000	156	553	6975	6448	-1.407	Error	Error	1910	5065	0	0	1778	4670	0	0	0	0
2	14	9	""	"YOR383C"	9050	16000	120	2558	2346	905	84	89	40	99	97	0	4406	4017	1584	278	296	201	93	92	0	0	0	0	0	0	0	0	0	0	0	0	0	0	0	0	0	0	0	0.599	0.605	0.586	0.635	1.961	0.566	0.866	0.000	0.000	0.000	0.000	0.000	0.000	0.000	0.000	0.000	0.000	0.000	0.000	0.000	0.000	120	491	6602	6001	-0.739	Error	Error	2474	4128	0	0	2262	3739	0	0	0	0
2	15	9	"ECM23"	"YPL021W"	9260	16000	130	1588	1495	498	83	90	43	100	100	0	3423	3282	964	267	287	194	100	99	0	0	0	0	0	0	0	0	0	0	0	0	0	0	0	0	0	0	0	0.477	0.468	0.480	0.465	1.496	0.458	0.852	0.000	0.000	0.000	0.000	0.000	0.000	0.000	0.000	0.000	0.000	0.000	0.000	0.000	0.000	120	560	4661	4427	-1.068	Error	Error	1505	3156	0	0	1412	3015	0	0	0	0
2	16	9	"KTR6"	"YPL053C"	9450	16000	140	1808	1710	686	85	92	55	99	98	0	2444	2334	1004	265	277	116	94	92	0	0	0	0	0	0	0	0	0	0	0	0	0	0	0	0	0	0	0	0.791	0.785	0.753	0.809	2.033	0.732	0.808	0.000	0.000	0.000	0.000	0.000	0.000	0.000	0.000	0.000	0.000	0.000	0.000	0.000	0.000	156	556	3902	3694	-0.339	Error	Error	1723	2179	0	0	1625	2069	0	0	0	0
2	17	9	""	"YPR078C"	9640	16010	130	4301	4042	1635	90	108	134	100	100	0	2959	2802	1022	267	309	228	95	92	0	0	0	0	0	0	0	0	0	0	0	0	0	0	0	0	0	0	0	1.564	1.559	1.550	1.534	1.836	1.613	0.869	0.000	0.000	0.000	0.000	0.000	0.000	0.000	0.000	0.000	0.000	0.000	0.000	0.000	0.000	120	528	6903	6487	0.645	Error	Error	4211	2692	0	0	3952	2535	0	0	0	0
2	18	9	"RPC40"	"YPR110C"	9830	16000	130	2859	2709	849	81	98	87	100	100	0	4697	4446	1372	267	294	189	100	100	0	0	0	0	0	0	0	0	0	0	0	0	0	0	0	0	0	0	0	0.627	0.629	0.644	0.635	1.438	0.611	0.880	0.000	0.000	0.000	0.000	0.000	0.000	0.000	0.000	0.000	0.000	0.000	0.000	0.000	0.000	120	564	7208	6807	-0.673	Error	Error	2778	4430	0	0	2628	4179	0	0	0	0
2	19	9	""	"YPR139C"	10030	16000	140	2072	1860	698	78	82	34	98	98	0	2591	2476	875	255	258	79	95	95	0	0	0	0	0	0	0	0	0	0	0	0	0	0	0	0	0	0	0	0.854	0.802	0.816	0.822	2.017	0.787	0.856	0.000	0.000	0.000	0.000	0.000	0.000	0.000	0.000	0.000	0.000	0.000	0.000	0.000	0.000	156	575	4330	4003	-0.228	Error	Error	1994	2336	0	0	1782	2221	0	0	0	0
2	20	9	"tef1"	"YPR080W"	10210	16000	130	3895	3671	1021	83	88	36	100	100	0	4047	3854	1025	262	269	93	100	100	0	0	0	0	0	0	0	0	0	0	0	0	0	0	0	0	0	0	0	1.007	0.999	0.990	0.993	1.309	0.988	0.870	0.000	0.000	0.000	0.000	0.000	0.000	0.000	0.000	0.000	0.000	0.000	0.000	0.000	0.000	120	520	7597	7180	0.010	Error	Error	3812	3785	0	0	3588	3592	0	0	0	0
2	21	9	""	"YPR112C"	10400	16000	130	3007	3193	1451	88	103	87	100	100	0	5191	5351	2292	271	306	286	100	100	0	0	0	0	0	0	0	0	0	0	0	0	0	0	0	0	0	0	0	0.593	0.611	0.605	0.611	1.427	0.593	0.903	0.000	0.000	0.000	0.000	0.000	0.000	0.000	0.000	0.000	0.000	0.000	0.000	0.000	0.000	120	649	7839	8185	-0.753	Error	Error	2919	4920	0	0	3105	5080	0	0	0	0
2	22	9	"kar3"	"YPR141C"	10610	16020	110	200	309	633	80	100	150	32	8	0	550	684	812	254	293	301	48	7	0	0	0	0	0	0	0	0	0	0	0	0	0	0	0	0	0	0	0	0.405	0.533	0.438	0.473	2.357	0.840	0.520	0.000	0.000	0.000	0.000	0.000	0.000	0.000	0.000	0.000	0.000	0.000	0.000	0.000	0.000	80	544	416	659	-1.303	Error	Error	120	296	0	0	229	430	0	0	0	0
2	1	10	"DIB1"	"YPR082C"	6600	16190	130	4438	4398	1007	84	88	47	100	100	0	4711	4660	1123	273	282	91	100	100	0	0	0	0	0	0	0	0	0	0	0	0	0	0	0	0	0	0	0	0.981	0.983	1.000	0.998	1.379	0.951	0.891	0.000	0.000	0.000	0.000	0.000	0.000	0.000	0.000	0.000	0.000	0.000	0.000	0.000	0.000	120	644	8792	8701	-0.028	Error	Error	4354	4438	0	0	4314	4387	0	0	0	0
2	2	10	""	"YPR114W"	6790	16190	130	6048	5608	1487	97	104	78	100	100	0	4571	4454	1014	281	300	129	100	100	0	0	0	0	0	0	0	0	0	0	0	0	0	0	0	0	0	0	0	1.387	1.321	1.355	1.294	1.351	1.376	0.858	0.000	0.000	0.000	0.000	0.000	0.000	0.000	0.000	0.000	0.000	0.000	0.000	0.000	0.000	120	536	10241	9684	0.472	Error	Error	5951	4290	0	0	5511	4173	0	0	0	0
2	3	10	""	"YPR143W"	6990	16190	130	2743	2603	953	94	100	70	100	100	0	3560	3392	1127	273	290	117	100	99	0	0	0	0	0	0	0	0	0	0	0	0	0	0	0	0	0	0	0	0.806	0.804	0.792	0.804	1.489	0.799	0.892	0.000	0.000	0.000	0.000	0.000	0.000	0.000	0.000	0.000	0.000	0.000	0.000	0.000	0.000	120	528	5936	5628	-0.311	Error	Error	2649	3287	0	0	2509	3119	0	0	0	0
2	4	10	""	"YPR084W"	7180	16190	140	6700	5858	2050	93	96	38	98	98	0	12033	11252	3493	291	301	94	99	99	0	0	0	0	0	0	0	0	0	0	0	0	0	0	0	0	0	0	0	0.563	0.526	0.532	0.500	1.760	0.520	0.888	0.000	0.000	0.000	0.000	0.000	0.000	0.000	0.000	0.000	0.000	0.000	0.000	0.000	0.000	156	535	18349	16726	-0.830	Error	Error	6607	11742	0	0	5765	10961	0	0	0	0
2	5	10	""	"YPR116W"	7370	16190	130	3489	3392	1042	95	104	52	100	100	0	3435	3425	1074	301	322	140	100	100	0	0	0	0	0	0	0	0	0	0	0	0	0	0	0	0	0	0	0	1.083	1.055	1.084	1.076	1.424	1.035	0.901	0.000	0.000	0.000	0.000	0.000	0.000	0.000	0.000	0.000	0.000	0.000	0.000	0.000	0.000	120	514	6528	6421	0.115	Error	Error	3394	3134	0	0	3297	3124	0	0	0	0
2	6	10	"ASN1"	"YPR145W"	7560	16190	140	5278	4880	1848	93	99	49	98	98	0	8055	7541	2828	280	297	112	98	98	0	0	0	0	0	0	0	0	0	0	0	0	0	0	0	0	0	0	0	0.667	0.659	0.646	0.636	1.714	0.638	0.884	0.000	0.000	0.000	0.000	0.000	0.000	0.000	0.000	0.000	0.000	0.000	0.000	0.000	0.000	156	560	12960	12048	-0.584	Error	Error	5185	7775	0	0	4787	7261	0	0	0	0
2	7	10	""	"iYAL056W"	7750	16190	130	1834	1705	590	90	96	59	100	99	0	3922	3798	1356	270	297	218	100	97	0	0	0	0	0	0	0	0	0	0	0	0	0	0	0	0	0	0	0	0.478	0.458	0.473	0.464	1.532	0.432	0.891	0.000	0.000	0.000	0.000	0.000	0.000	0.000	0.000	0.000	0.000	0.000	0.000	0.000	0.000	120	540	5396	5143	-1.066	Error	Error	1744	3652	0	0	1615	3528	0	0	0	0
2	8	10	""	"iYAL051W"	7940	16190	130	554	517	190	82	92	58	95	94	0	2117	2024	804	273	300	214	95	89	0	0	0	0	0	0	0	0	0	0	0	0	0	0	0	0	0	0	0	0.256	0.248	0.259	0.258	1.848	0.220	0.808	0.000	0.000	0.000	0.000	0.000	0.000	0.000	0.000	0.000	0.000	0.000	0.000	0.000	0.000	120	559	2316	2186	-1.966	Error	Error	472	1844	0	0	435	1751	0	0	0	0
2	9	10	""	"iYAL046C"	8130	16200	120	696	686	210	76	82	46	99	98	0	1089	1060	353	253	308	1059	21	0	0	0	0	0	0	0	0	0	0	0	0	0	0	0	0	0	0	0	0	0.742	0.756	0.751	0.770	1.748	0.691	0.784	0.000	0.000	0.000	0.000	0.000	0.000	0.000	0.000	0.000	0.000	0.000	0.000	0.000	0.000	120	509	1456	1417	-0.431	Error	Error	620	836	0	0	610	807	0	0	0	0
2	10	10	""	"iYAL031C"	8330	16200	130	1371	1227	491	79	84	32	100	100	0	2063	1853	767	252	266	91	95	93	0	0	0	0	0	0	0	0	0	0	0	0	0	0	0	0	0	0	0	0.713	0.717	0.716	0.772	2.038	0.665	0.829	0.000	0.000	0.000	0.000	0.000	0.000	0.000	0.000	0.000	0.000	0.000	0.000	0.000	0.000	120	550	3103	2749	-0.487	Error	Error	1292	1811	0	0	1148	1601	0	0	0	0
2	11	10	""	"iYAL027W"	8520	16200	120	968	899	352	84	89	41	98	95	0	2975	2716	1056	265	285	102	99	96	0	0	0	0	0	0	0	0	0	0	0	0	0	0	0	0	0	0	0	0.326	0.333	0.332	0.333	1.718	0.306	0.833	0.000	0.000	0.000	0.000	0.000	0.000	0.000	0.000	0.000	0.000	0.000	0.000	0.000	0.000	120	566	3594	3266	-1.616	Error	Error	884	2710	0	0	815	2451	0	0	0	0
2	12	10	""	"iYAL023C"	8720	16200	120	1803	1650	736	82	87	48	99	97	0	1525	1365	598	269	281	97	92	88	0	0	0	0	0	0	0	0	0	0	0	0	0	0	0	0	0	0	0	1.370	1.431	1.359	1.456	1.892	1.412	0.817	0.000	0.000	0.000	0.000	0.000	0.000	0.000	0.000	0.000	0.000	0.000	0.000	0.000	0.000	120	509	2977	2664	0.454	Error	Error	1721	1256	0	0	1568	1096	0	0	0	0
2	13	10	""	"iYAL007C"	8900	16200	130	2058	2126	898	83	84	29	100	100	0	3846	3658	1634	269	278	79	98	98	0	0	0	0	0	0	0	0	0	0	0	0	0	0	0	0	0	0	0	0.552	0.603	0.595	0.635	1.946	0.566	0.862	0.000	0.000	0.000	0.000	0.000	0.000	0.000	0.000	0.000	0.000	0.000	0.000	0.000	0.000	120	516	5552	5432	-0.857	Error	Error	1975	3577	0	0	2043	3389	0	0	0	0
2	14	10	""	"iYAL003W"	9090	16200	130	3267	3199	1237	86	91	42	100	100	0	3061	2909	1201	272	287	112	98	97	0	0	0	0	0	0	0	0	0	0	0	0	0	0	0	0	0	0	0	1.141	1.181	1.164	1.229	1.763	1.142	0.848	0.000	0.000	0.000	0.000	0.000	0.000	0.000	0.000	0.000	0.000	0.000	0.000	0.000	0.000	120	591	5970	5750	0.190	Error	Error	3181	2789	0	0	3113	2637	0	0	0	0
2	15	10	""	"iYAR002W"	9280	16200	130	1403	1309	452	83	91	55	99	98	0	2953	2816	1099	268	278	93	97	96	0	0	0	0	0	0	0	0	0	0	0	0	0	0	0	0	0	0	0	0.492	0.481	0.480	0.509	1.875	0.437	0.859	0.000	0.000	0.000	0.000	0.000	0.000	0.000	0.000	0.000	0.000	0.000	0.000	0.000	0.000	120	572	4005	3774	-1.024	Error	Error	1320	2685	0	0	1226	2548	0	0	0	0
2	16	10	""	"itL(CAA)A"	9480	16200	130	4023	3801	1134	84	92	57	100	100	0	5847	5556	1604	266	277	85	100	100	0	0	0	0	0	0	0	0	0	0	0	0	0	0	0	0	0	0	0	0.706	0.703	0.731	0.703	1.350	0.684	0.883	0.000	0.000	0.000	0.000	0.000	0.000	0.000	0.000	0.000	0.000	0.000	0.000	0.000	0.000	120	535	9520	9007	-0.503	Error	Error	3939	5581	0	0	3717	5290	0	0	0	0
2	17	10	""	"iYAR028W"	9660	16200	130	3333	2996	1353	101	127	105	99	97	0	4677	4240	1967	301	364	245	95	93	0	0	0	0	0	0	0	0	0	0	0	0	0	0	0	0	0	0	0	0.739	0.735	0.698	0.751	1.925	0.688	0.830	0.000	0.000	0.000	0.000	0.000	0.000	0.000	0.000	0.000	0.000	0.000	0.000	0.000	0.000	120	549	7608	6834	-0.437	Error	Error	3232	4376	0	0	2895	3939	0	0	0	0
2	18	10	""	"iYAR035W"	9860	16200	130	1135	1109	423	92	119	105	100	96	0	1351	1333	458	288	346	243	95	88	0	0	0	0	0	0	0	0	0	0	0	0	0	0	0	0	0	0	0	0.981	0.973	0.967	0.975	1.651	0.917	0.808	0.000	0.000	0.000	0.000	0.000	0.000	0.000	0.000	0.000	0.000	0.000	0.000	0.000	0.000	120	568	2106	2062	-0.027	Error	Error	1043	1063	0	0	1017	1045	0	0	0	0
2	19	10	""	"iYBR162C"	10050	16200	130	1559	1394	508	79	82	28	100	100	0	1356	1357	500	258	260	75	96	95	0	0	0	0	0	0	0	0	0	0	0	0	0	0	0	0	0	0	0	1.348	1.197	1.232	1.185	1.555	1.179	0.806	0.000	0.000	0.000	0.000	0.000	0.000	0.000	0.000	0.000	0.000	0.000	0.000	0.000	0.000	120	521	2578	2414	0.431	Error	Error	1480	1098	0	0	1315	1099	0	0	0	0
2	20	10	""	"iYBR165W"	10230	16200	130	398	386	121	81	90	58	97	91	0	1019	1021	353	258	272	99	95	92	0	0	0	0	0	0	0	0	0	0	0	0	0	0	0	0	0	0	0	0.417	0.400	0.404	0.386	1.738	0.327	0.691	0.000	0.000	0.000	0.000	0.000	0.000	0.000	0.000	0.000	0.000	0.000	0.000	0.000	0.000	120	571	1078	1068	-1.263	Error	Error	317	761	0	0	305	763	0	0	0	0
2	21	10	""	"iYBR169C"	10420	16210	110	913	840	258	82	96	79	98	97	0	1195	1168	330	266	289	155	95	93	0	0	0	0	0	0	0	0	0	0	0	0	0	0	0	0	0	0	0	0.895	0.840	0.869	0.861	1.748	0.782	0.797	0.000	0.000	0.000	0.000	0.000	0.000	0.000	0.000	0.000	0.000	0.000	0.000	0.000	0.000	80	470	1760	1660	-0.161	Error	Error	831	929	0	0	758	902	0	0	0	0
2	22	10	""	"iYBR187W"	10610	16200	120	853	815	265	75	82	54	100	98	0	1002	957	268	253	267	138	96	91	0	0	0	0	0	0	0	0	0	0	0	0	0	0	0	0	0	0	0	1.039	1.051	1.085	1.048	1.601	1.004	0.774	0.000	0.000	0.000	0.000	0.000	0.000	0.000	0.000	0.000	0.000	0.000	0.000	0.000	0.000	120	598	1527	1444	0.055	Error	Error	778	749	0	0	740	704	0	0	0	0
2	1	11	""	"iYBR192W"	6630	16380	130	1906	1791	582	85	88	34	99	99	0	5050	4827	1453	274	285	85	100	99	0	0	0	0	0	0	0	0	0	0	0	0	0	0	0	0	0	0	0	0.381	0.375	0.379	0.362	1.609	0.357	0.856	0.000	0.000	0.000	0.000	0.000	0.000	0.000	0.000	0.000	0.000	0.000	0.000	0.000	0.000	120	633	6597	6259	-1.391	Error	Error	1821	4776	0	0	1706	4553	0	0	0	0
2	2	11	""	"iYBR196C"	6810	16380	130	3360	3430	1470	89	96	71	100	100	0	3093	2965	1221	286	300	99	100	97	0	0	0	0	0	0	0	0	0	0	0	0	0	0	0	0	0	0	0	1.165	1.247	1.308	1.299	1.650	1.279	0.865	0.000	0.000	0.000	0.000	0.000	0.000	0.000	0.000	0.000	0.000	0.000	0.000	0.000	0.000	120	550	6078	6020	0.221	Error	Error	3271	2807	0	0	3341	2679	0	0	0	0
2	3	11	""	"iYBRCdelta19"	7010	16390	130	2287	2297	932	87	90	46	100	100	0	2693	2615	1064	282	291	92	97	96	0	0	0	0	0	0	0	0	0	0	0	0	0	0	0	0	0	0	0	0.912	0.947	0.954	0.994	1.819	0.905	0.837	0.000	0.000	0.000	0.000	0.000	0.000	0.000	0.000	0.000	0.000	0.000	0.000	0.000	0.000	120	550	4611	4543	-0.132	Error	Error	2200	2411	0	0	2210	2333	0	0	0	0
2	4	11	""	"iYBR212W"	7200	16390	130	2434	2280	733	88	90	33	100	100	0	2374	2335	751	284	290	85	100	100	0	0	0	0	0	0	0	0	0	0	0	0	0	0	0	0	0	0	0	1.122	1.069	1.039	1.094	1.473	1.049	0.866	0.000	0.000	0.000	0.000	0.000	0.000	0.000	0.000	0.000	0.000	0.000	0.000	0.000	0.000	120	525	4436	4243	0.167	Error	Error	2346	2090	0	0	2192	2051	0	0	0	0
2	5	11	""	"iYBR216C"	7390	16390	130	1108	1074	368	90	95	48	100	100	0	1720	1723	588	287	302	97	97	97	0	0	0	0	0	0	0	0	0	0	0	0	0	0	0	0	0	0	0	0.710	0.685	0.691	0.675	1.493	0.659	0.832	0.000	0.000	0.000	0.000	0.000	0.000	0.000	0.000	0.000	0.000	0.000	0.000	0.000	0.000	120	545	2451	2420	-0.493	Error	Error	1018	1433	0	0	984	1436	0	0	0	0
2	6	11	""	"iYBR237W"	7590	16390	130	1047	1048	444	87	91	41	99	98	0	3746	3589	1446	273	286	97	98	98	0	0	0	0	0	0	0	0	0	0	0	0	0	0	0	0	0	0	0	0.276	0.290	0.290	0.298	2.012	0.274	0.865	0.000	0.000	0.000	0.000	0.000	0.000	0.000	0.000	0.000	0.000	0.000	0.000	0.000	0.000	120	526	4433	4277	-1.855	Error	Error	960	3473	0	0	961	3316	0	0	0	0
2	7	11	""	"iYBR241C"	7770	16390	130	1497	1463	412	84	91	52	100	100	0	2175	2178	556	270	289	163	99	98	0	0	0	0	0	0	0	0	0	0	0	0	0	0	0	0	0	0	0	0.742	0.723	0.713	0.724	1.475	0.675	0.848	0.000	0.000	0.000	0.000	0.000	0.000	0.000	0.000	0.000	0.000	0.000	0.000	0.000	0.000	120	524	3318	3287	-0.431	Error	Error	1413	1905	0	0	1379	1908	0	0	0	0
2	8	11	""	"iYBR246W"	7960	16390	120	915	887	357	84	90	33	100	100	0	3137	2873	1112	274	286	82	97	96	0	0	0	0	0	0	0	0	0	0	0	0	0	0	0	0	0	0	0	0.290	0.309	0.304	0.322	1.691	0.297	0.876	0.000	0.000	0.000	0.000	0.000	0.000	0.000	0.000	0.000	0.000	0.000	0.000	0.000	0.000	120	454	3694	3402	-1.785	Error	Error	831	2863	0	0	803	2599	0	0	0	0
2	9	11	""	"iYDL140C"	8150	16390	140	1218	1172	382	82	88	32	99	99	0	1000	991	304	262	271	75	95	94	0	0	0	0	0	0	0	0	0	0	0	0	0	0	0	0	0	0	0	1.539	1.495	1.441	1.449	1.706	1.509	0.755	0.000	0.000	0.000	0.000	0.000	0.000	0.000	0.000	0.000	0.000	0.000	0.000	0.000	0.000	156	531	1874	1819	0.622	Error	Error	1136	738	0	0	1090	729	0	0	0	0
2	10	11	""	"iYDL136W"	8340	16390	130	1141	1056	324	85	92	44	100	100	0	4333	4005	1351	268	280	91	99	99	0	0	0	0	0	0	0	0	0	0	0	0	0	0	0	0	0	0	0	0.260	0.260	0.268	0.270	1.645	0.240	0.873	0.000	0.000	0.000	0.000	0.000	0.000	0.000	0.000	0.000	0.000	0.000	0.000	0.000	0.000	120	499	5121	4708	-1.945	Error	Error	1056	4065	0	0	971	3737	0	0	0	0
2	11	11	""	"iYDL133W"	8530	16400	100	1206	1105	409	88	94	45	100	98	0	1315	1271	396	276	288	87	98	97	0	0	0	0	0	0	0	0	0	0	0	0	0	0	0	0	0	0	0	1.076	1.022	1.024	0.988	1.626	1.041	0.807	0.000	0.000	0.000	0.000	0.000	0.000	0.000	0.000	0.000	0.000	0.000	0.000	0.000	0.000	80	416	2157	2012	0.106	Error	Error	1118	1039	0	0	1017	995	0	0	0	0
2	12	11	""	"iYDL117W"	8720	16390	130	990	946	264	85	88	33	100	100	0	1234	1231	334	265	274	88	98	97	0	0	0	0	0	0	0	0	0	0	0	0	0	0	0	0	0	0	0	0.934	0.891	0.938	0.891	1.602	0.848	0.815	0.000	0.000	0.000	0.000	0.000	0.000	0.000	0.000	0.000	0.000	0.000	0.000	0.000	0.000	120	506	1874	1827	-0.099	Error	Error	905	969	0	0	861	966	0	0	0	0
2	13	11	""	"iYDL113C"	8900	16390	120	1088	1037	339	85	87	31	100	100	0	984	972	283	263	269	75	95	95	0	0	0	0	0	0	0	0	0	0	0	0	0	0	0	0	0	0	0	1.391	1.343	1.346	1.398	2.017	1.329	0.783	0.000	0.000	0.000	0.000	0.000	0.000	0.000	0.000	0.000	0.000	0.000	0.000	0.000	0.000	120	474	1724	1661	0.476	Error	Error	1003	721	0	0	952	709	0	0	0	0
2	14	11	""	"iYDL109C"	9080	16390	110	1121	1051	451	92	116	112	98	93	0	1136	1186	437	277	323	306	95	78	0	0	0	0	0	0	0	0	0	0	0	0	0	0	0	0	0	0	0	1.198	1.055	1.111	1.062	1.827	0.849	0.560	0.000	0.000	0.000	0.000	0.000	0.000	0.000	0.000	0.000	0.000	0.000	0.000	0.000	0.000	80	459	1888	1868	0.261	Error	Error	1029	859	0	0	959	909	0	0	0	0
2	15	11	""	"iYDL090C"	9280	16390	120	1525	1453	489	95	119	109	100	100	0	1717	1683	511	285	345	303	96	91	0	0	0	0	0	0	0	0	0	0	0	0	0	0	0	0	0	0	0	0.999	0.971	0.985	0.982	1.739	0.940	0.806	0.000	0.000	0.000	0.000	0.000	0.000	0.000	0.000	0.000	0.000	0.000	0.000	0.000	0.000	120	530	2862	2756	-0.002	Error	Error	1430	1432	0	0	1358	1398	0	0	0	0
2	16	11	""	"iYDL086W"	9470	16390	130	1759	1672	494	94	110	77	100	100	0	1867	1841	475	281	346	582	97	79	0	0	0	0	0	0	0	0	0	0	0	0	0	0	0	0	0	0	0	1.050	1.012	1.074	0.993	1.454	1.005	0.831	0.000	0.000	0.000	0.000	0.000	0.000	0.000	0.000	0.000	0.000	0.000	0.000	0.000	0.000	120	570	3251	3138	0.070	Error	Error	1665	1586	0	0	1578	1560	0	0	0	0
2	17	11	""	"iYDL082W"	9680	16390	130	554	560	276	110	136	101	92	80	0	1642	1776	868	315	399	617	83	59	0	0	0	0	0	0	0	0	0	0	0	0	0	0	0	0	0	0	0	0.335	0.308	0.300	0.284	1.797	0.185	0.500	0.000	0.000	0.000	0.000	0.000	0.000	0.000	0.000	0.000	0.000	0.000	0.000	0.000	0.000	120	529	1771	1911	-1.580	Error	Error	444	1327	0	0	450	1461	0	0	0	0
2	18	11	""	"iYDL065C"	9850	16390	130	699	659	206	93	115	83	96	93	0	1178	1139	330	289	326	192	95	90	0	0	0	0	0	0	0	0	0	0	0	0	0	0	0	0	0	0	0	0.682	0.666	0.663	0.668	1.731	0.583	0.805	0.000	0.000	0.000	0.000	0.000	0.000	0.000	0.000	0.000	0.000	0.000	0.000	0.000	0.000	120	498	1495	1416	-0.553	Error	Error	606	889	0	0	566	850	0	0	0	0
2	19	11	""	"iYDL060W"	10040	16390	120	329	326	96	77	80	29	99	98	0	647	666	173	248	253	76	98	96	0	0	0	0	0	0	0	0	0	0	0	0	0	0	0	0	0	0	0	0.632	0.596	0.622	0.600	1.685	0.496	0.609	0.000	0.000	0.000	0.000	0.000	0.000	0.000	0.000	0.000	0.000	0.000	0.000	0.000	0.000	120	479	651	667	-0.663	Error	Error	252	399	0	0	249	418	0	0	0	0
2	20	11	""	"iYDL056W"	10230	16390	120	593	559	195	80	82	29	100	98	0	2586	2421	826	249	261	83	98	96	0	0	0	0	0	0	0	0	0	0	0	0	0	0	0	0	0	0	0	0.220	0.221	0.209	0.222	1.688	0.202	0.836	0.000	0.000	0.000	0.000	0.000	0.000	0.000	0.000	0.000	0.000	0.000	0.000	0.000	0.000	120	456	2850	2651	-2.188	Error	Error	513	2337	0	0	479	2172	0	0	0	0
2	21	11	""	"iYDRWdelta12"	10420	16390	130	1123	1100	249	79	83	40	100	100	0	1571	1580	427	264	277	116	99	97	0	0	0	0	0	0	0	0	0	0	0	0	0	0	0	0	0	0	0	0.799	0.776	0.767	0.807	1.458	0.722	0.826	0.000	0.000	0.000	0.000	0.000	0.000	0.000	0.000	0.000	0.000	0.000	0.000	0.000	0.000	120	484	2351	2337	-0.324	Error	Error	1044	1307	0	0	1021	1316	0	0	0	0
2	22	11	""	"iYDR244W"	10590	16390	120	666	653	207	75	79	39	100	100	0	971	946	264	255	265	114	97	95	0	0	0	0	0	0	0	0	0	0	0	0	0	0	0	0	0	0	0	0.825	0.836	0.874	0.839	1.641	0.779	0.751	0.000	0.000	0.000	0.000	0.000	0.000	0.000	0.000	0.000	0.000	0.000	0.000	0.000	0.000	120	574	1307	1269	-0.277	Error	Error	591	716	0	0	578	691	0	0	0	0
2	1	12	""	"iYDR248C"	6620	16580	130	2177	2214	704	75	79	31	100	100	0	5773	5534	1752	258	267	83	100	100	0	0	0	0	0	0	0	0	0	0	0	0	0	0	0	0	0	0	0	0.381	0.405	0.407	0.416	1.494	0.380	0.874	0.000	0.000	0.000	0.000	0.000	0.000	0.000	0.000	0.000	0.000	0.000	0.000	0.000	0.000	120	608	7617	7415	-1.392	Error	Error	2102	5515	0	0	2139	5276	0	0	0	0
2	2	12	""	"itG(GCC)D2"	6800	16580	130	1034	962	279	78	83	42	100	100	0	1656	1590	504	274	284	83	97	97	0	0	0	0	0	0	0	0	0	0	0	0	0	0	0	0	0	0	0	0.692	0.672	0.670	0.686	1.656	0.616	0.828	0.000	0.000	0.000	0.000	0.000	0.000	0.000	0.000	0.000	0.000	0.000	0.000	0.000	0.000	120	493	2338	2200	-0.532	Error	Error	956	1382	0	0	884	1316	0	0	0	0
2	3	12	""	"iYDR265W"	6970	16570	130	942	883	257	80	84	46	100	99	0	2071	1995	617	281	288	100	97	97	0	0	0	0	0	0	0	0	0	0	0	0	0	0	0	0	0	0	0	0.482	0.468	0.495	0.512	2.165	0.420	0.838	0.000	0.000	0.000	0.000	0.000	0.000	0.000	0.000	0.000	0.000	0.000	0.000	0.000	0.000	120	504	2652	2517	-1.054	Error	Error	862	1790	0	0	803	1714	0	0	0	0
2	4	12	""	"iYDR271C"	7170	16580	130	770	756	146	81	84	35	100	100	0	1200	1195	265	271	282	99	100	100	0	0	0	0	0	0	0	0	0	0	0	0	0	0	0	0	0	0	0	0.742	0.731	0.726	0.744	1.410	0.646	0.790	0.000	0.000	0.000	0.000	0.000	0.000	0.000	0.000	0.000	0.000	0.000	0.000	0.000	0.000	120	504	1618	1599	-0.431	Error	Error	689	929	0	0	675	924	0	0	0	0
2	5	12	""	"iYDR286C"	7360	16570	130	3826	3822	956	84	87	43	100	100	0	3713	3668	918	278	287	96	100	100	0	0	0	0	0	0	0	0	0	0	0	0	0	0	0	0	0	0	0	1.089	1.103	1.137	1.104	1.352	1.094	0.898	0.000	0.000	0.000	0.000	0.000	0.000	0.000	0.000	0.000	0.000	0.000	0.000	0.000	0.000	120	491	7177	7128	0.123	Error	Error	3742	3435	0	0	3738	3390	0	0	0	0
2	6	12	""	"iYDR292C"	7550	16580	130	2693	2586	742	84	87	42	100	100	0	3895	3814	1170	273	287	100	100	100	0	0	0	0	0	0	0	0	0	0	0	0	0	0	0	0	0	0	0	0.720	0.707	0.716	0.717	1.322	0.663	0.895	0.000	0.000	0.000	0.000	0.000	0.000	0.000	0.000	0.000	0.000	0.000	0.000	0.000	0.000	120	523	6231	6043	-0.473	Error	Error	2609	3622	0	0	2502	3541	0	0	0	0
2	7	12	""	"iYDR296W"	7740	16580	130	1993	1909	627	81	83	27	100	100	0	1713	1614	526	270	279	89	98	96	0	0	0	0	0	0	0	0	0	0	0	0	0	0	0	0	0	0	0	1.325	1.360	1.358	1.413	1.643	1.376	0.845	0.000	0.000	0.000	0.000	0.000	0.000	0.000	0.000	0.000	0.000	0.000	0.000	0.000	0.000	120	507	3355	3172	0.406	Error	Error	1912	1443	0	0	1828	1344	0	0	0	0
2	8	12	""	"iYDR311W"	7940	16570	150	99	145	129	84	88	34	39	25	0	308	389	262	268	281	90	37	21	0	0	0	0	0	0	0	0	0	0	0	0	0	0	0	0	0	0	0	0.375	0.504	0.469	0.421	2.664	0.374	0.488	0.000	0.000	0.000	0.000	0.000	0.000	0.000	0.000	0.000	0.000	0.000	0.000	0.000	0.000	156	528	55	182	-1.415	Error	Error	15	40	0	0	61	121	0	0	-50	0
2	9	12	""	"iYDR315C"	8120	16580	130	695	684	212	83	88	34	100	100	0	758	752	248	265	276	83	94	93	0	0	0	0	0	0	0	0	0	0	0	0	0	0	0	0	0	0	0	1.241	1.234	1.294	1.345	1.888	1.124	0.682	0.000	0.000	0.000	0.000	0.000	0.000	0.000	0.000	0.000	0.000	0.000	0.000	0.000	0.000	120	436	1105	1088	0.312	Error	Error	612	493	0	0	601	487	0	0	0	0
2	10	12	""	"iYDR317W"	8320	16570	150	106	151	140	83	87	32	42	27	0	315	388	272	271	275	81	37	19	0	0	0	0	0	0	0	0	0	0	0	0	0	0	0	0	0	0	0	0.523	0.581	0.510	0.500	3.208	0.396	0.484	0.000	0.000	0.000	0.000	0.000	0.000	0.000	0.000	0.000	0.000	0.000	0.000	0.000	0.000	156	508	67	185	-0.936	Error	Error	23	44	0	0	68	117	0	0	-50	0
2	11	12	""	"itK(CUU)E1"	8500	16580	120	363	368	127	88	91	34	96	94	0	975	981	326	276	284	83	96	95	0	0	0	0	0	0	0	0	0	0	0	0	0	0	0	0	0	0	0	0.393	0.397	0.413	0.403	1.851	0.341	0.714	0.000	0.000	0.000	0.000	0.000	0.000	0.000	0.000	0.000	0.000	0.000	0.000	0.000	0.000	120	423	974	985	-1.346	Error	Error	275	699	0	0	280	705	0	0	0	0
2	12	12	""	"iYELWdelta6"	8680	16570	130	385	377	124	86	89	35	97	94	0	1009	1015	339	265	276	83	97	97	0	0	0	0	0	0	0	0	0	0	0	0	0	0	0	0	0	0	0	0.402	0.388	0.411	0.388	1.670	0.343	0.735	0.000	0.000	0.000	0.000	0.000	0.000	0.000	0.000	0.000	0.000	0.000	0.000	0.000	0.000	120	473	1043	1041	-1.315	Error	Error	299	744	0	0	291	750	0	0	0	0
2	13	12	""	"iYEL007W"	8860	16570	130	1052	1068	431	85	89	41	100	98	0	1935	1884	685	267	277	87	98	98	0	0	0	0	0	0	0	0	0	0	0	0	0	0	0	0	0	0	0	0.580	0.608	0.577	0.598	1.512	0.575	0.836	0.000	0.000	0.000	0.000	0.000	0.000	0.000	0.000	0.000	0.000	0.000	0.000	0.000	0.000	120	484	2635	2600	-0.787	Error	Error	967	1668	0	0	983	1617	0	0	0	0
2	14	12	""	"isnR14"	9060	16580	120	812	763	311	94	104	70	95	91	0	1434	1371	560	279	313	272	89	85	0	0	0	0	0	0	0	0	0	0	0	0	0	0	0	0	0	0	0	0.622	0.613	0.608	0.625	1.861	0.554	0.825	0.000	0.000	0.000	0.000	0.000	0.000	0.000	0.000	0.000	0.000	0.000	0.000	0.000	0.000	120	508	1873	1761	-0.686	Error	Error	718	1155	0	0	669	1092	0	0	0	0
2	15	12	""	"iYER010C-1"	9250	16580	130	1286	1392	725	97	114	83	99	95	0	1596	1577	704	299	345	281	91	84	0	0	0	0	0	0	0	0	0	0	0	0	0	0	0	0	0	0	0	0.917	1.013	1.001	1.005	1.714	1.024	0.855	0.000	0.000	0.000	0.000	0.000	0.000	0.000	0.000	0.000	0.000	0.000	0.000	0.000	0.000	120	563	2486	2573	-0.125	Error	Error	1189	1297	0	0	1295	1278	0	0	0	0
2	16	12	""	"iYER012W"	9440	16580	120	984	945	413	92	107	68	96	95	0	1072	1040	377	283	325	174	90	85	0	0	0	0	0	0	0	0	0	0	0	0	0	0	0	0	0	0	0	1.131	1.127	1.132	1.138	1.907	1.120	0.793	0.000	0.000	0.000	0.000	0.000	0.000	0.000	0.000	0.000	0.000	0.000	0.000	0.000	0.000	120	482	1681	1610	0.177	Error	Error	892	789	0	0	853	757	0	0	0	0
2	17	12	""	"iYER027C"	9630	16580	120	1295	1277	499	95	115	82	99	98	0	1565	1517	555	285	357	629	85	50	0	0	0	0	0	0	0	0	0	0	0	0	0	0	0	0	0	0	0	0.938	0.959	0.980	1.010	1.778	0.557	0.421	0.000	0.000	0.000	0.000	0.000	0.000	0.000	0.000	0.000	0.000	0.000	0.000	0.000	0.000	120	483	2480	2414	-0.093	Error	Error	1200	1280	0	0	1182	1232	0	0	0	0
2	18	12	""	"iYER031C"	9820	16580	130	607	598	212	89	98	52	99	96	0	841	851	258	278	300	128	95	90	0	0	0	0	0	0	0	0	0	0	0	0	0	0	0	0	0	0	0	0.920	0.888	0.859	0.896	1.589	0.847	0.732	0.000	0.000	0.000	0.000	0.000	0.000	0.000	0.000	0.000	0.000	0.000	0.000	0.000	0.000	120	487	1081	1082	-0.120	Error	Error	518	563	0	0	509	573	0	0	0	0
2	19	12	""	"iYER035W"	10010	16570	130	526	535	139	75	81	54	100	100	0	1334	1343	317	255	263	84	100	100	0	0	0	0	0	0	0	0	0	0	0	0	0	0	0	0	0	0	0	0.418	0.423	0.425	0.421	1.319	0.399	0.868	0.000	0.000	0.000	0.000	0.000	0.000	0.000	0.000	0.000	0.000	0.000	0.000	0.000	0.000	120	538	1530	1548	-1.258	Error	Error	451	1079	0	0	460	1088	0	0	0	0
2	20	12	""	"iYERWdelta9"	10220	16570	150	99	165	322	78	128	335	3	1	0	309	409	337	255	309	340	12	5	0	0	0	0	0	0	0	0	0	0	0	0	0	0	0	0	0	0	0	0.389	0.565	0.433	0.427	3.395	0.959	0.871	0.000	0.000	0.000	0.000	0.000	0.000	0.000	0.000	0.000	0.000	0.000	0.000	0.000	0.000	156	572	75	241	-1.363	Error	Error	21	54	0	0	87	154	0	0	-50	0
2	21	12	""	"iYER050C"	10410	16570	150	93	129	105	79	84	83	23	13	0	286	381	269	261	276	128	27	15	0	0	0	0	0	0	0	0	0	0	0	0	0	0	0	0	0	0	0	0.560	0.417	0.533	0.516	3.668	0.279	0.435	0.000	0.000	0.000	0.000	0.000	0.000	0.000	0.000	0.000	0.000	0.000	0.000	0.000	0.000	156	561	39	170	-0.837	Error	Error	14	25	0	0	50	120	0	0	-50	0
2	22	12	""	"iYER053C-1"	10580	16580	80	136	183	134	78	80	28	61	50	0	390	473	360	262	273	82	51	38	0	0	0	0	0	0	0	0	0	0	0	0	0	0	0	0	0	0	0	0.453	0.498	0.468	0.620	4.352	0.317	0.516	0.000	0.000	0.000	0.000	0.000	0.000	0.000	0.000	0.000	0.000	0.000	0.000	0.000	0.000	52	295	186	316	-1.142	Error	Error	58	128	0	0	105	211	0	0	0	0
2	1	13	""	"iYFR048W"	6600	16750	130	2009	1864	566	68	73	45	100	100	0	5653	5412	1748	246	251	72	100	100	0	0	0	0	0	0	0	0	0	0	0	0	0	0	0	0	0	0	0	0.359	0.348	0.356	0.351	1.458	0.332	0.893	0.000	0.000	0.000	0.000	0.000	0.000	0.000	0.000	0.000	0.000	0.000	0.000	0.000	0.000	120	638	7348	6962	-1.478	Error	Error	1941	5407	0	0	1796	5166	0	0	0	0
2	2	13	""	"iYFR052W"	6800	16760	130	853	795	265	72	74	25	100	100	0	1793	1722	607	254	261	77	96	96	0	0	0	0	0	0	0	0	0	0	0	0	0	0	0	0	0	0	0	0.507	0.493	0.502	0.502	1.724	0.445	0.818	0.000	0.000	0.000	0.000	0.000	0.000	0.000	0.000	0.000	0.000	0.000	0.000	0.000	0.000	120	528	2320	2191	-0.979	Error	Error	781	1539	0	0	723	1468	0	0	0	0
2	3	13	""	"iYFR054C-0"	6990	16760	130	2751	2653	1103	78	81	31	100	100	0	5521	5376	2258	260	265	93	100	99	0	0	0	0	0	0	0	0	0	0	0	0	0	0	0	0	0	0	0	0.508	0.503	0.517	0.526	1.662	0.474	0.876	0.000	0.000	0.000	0.000	0.000	0.000	0.000	0.000	0.000	0.000	0.000	0.000	0.000	0.000	120	501	7934	7691	-0.977	Error	Error	2673	5261	0	0	2575	5116	0	0	0	0
2	4	13	""	"iYGL257C"	7170	16760	140	2802	2691	772	79	82	34	100	99	0	2685	2543	870	263	272	96	96	96	0	0	0	0	0	0	0	0	0	0	0	0	0	0	0	0	0	0	0	1.124	1.146	1.128	1.161	1.604	1.102	0.848	0.000	0.000	0.000	0.000	0.000	0.000	0.000	0.000	0.000	0.000	0.000	0.000	0.000	0.000	156	527	5145	4892	0.169	Error	Error	2723	2422	0	0	2612	2280	0	0	0	0
2	5	13	""	"iYGL256W-3"	7370	16760	140	2961	2806	1225	79	84	35	99	99	0	2974	2744	1108	268	279	89	95	95	0	0	0	0	0	0	0	0	0	0	0	0	0	0	0	0	0	0	0	1.065	1.101	1.119	1.076	1.912	1.117	0.849	0.000	0.000	0.000	0.000	0.000	0.000	0.000	0.000	0.000	0.000	0.000	0.000	0.000	0.000	156	531	5588	5203	0.091	Error	Error	2882	2706	0	0	2727	2476	0	0	0	0
2	6	13	""	"iYGL252C"	7560	16770	130	2615	2544	1073	81	83	29	100	100	0	3041	2880	1248	264	274	83	98	96	0	0	0	0	0	0	0	0	0	0	0	0	0	0	0	0	0	0	0	0.912	0.942	0.955	1.007	1.753	0.896	0.877	0.000	0.000	0.000	0.000	0.000	0.000	0.000	0.000	0.000	0.000	0.000	0.000	0.000	0.000	120	503	5311	5079	-0.132	Error	Error	2534	2777	0	0	2463	2616	0	0	0	0
2	7	13	""	"iYGL233W"	7750	16760	120	358	342	107	81	84	30	97	92	0	835	832	258	257	266	81	96	93	0	0	0	0	0	0	0	0	0	0	0	0	0	0	0	0	0	0	0	0.479	0.454	0.487	0.450	1.921	0.380	0.671	0.000	0.000	0.000	0.000	0.000	0.000	0.000	0.000	0.000	0.000	0.000	0.000	0.000	0.000	120	484	855	836	-1.061	Error	Error	277	578	0	0	261	575	0	0	0	0
2	8	13	""	"iYGL228W"	7930	16760	130	1743	1647	603	80	84	35	100	99	0	1942	1880	667	257	272	91	95	95	0	0	0	0	0	0	0	0	0	0	0	0	0	0	0	0	0	0	0	0.987	0.965	0.994	1.030	1.878	0.940	0.820	0.000	0.000	0.000	0.000	0.000	0.000	0.000	0.000	0.000	0.000	0.000	0.000	0.000	0.000	120	498	3348	3190	-0.019	Error	Error	1663	1685	0	0	1567	1623	0	0	0	0
2	9	13	""	"itV(AAC)G3-0"	8130	16760	140	2648	2539	901	78	84	43	99	98	0	2828	2719	901	261	272	91	98	98	0	0	0	0	0	0	0	0	0	0	0	0	0	0	0	0	0	0	0	1.001	1.001	1.006	0.994	1.543	0.988	0.892	0.000	0.000	0.000	0.000	0.000	0.000	0.000	0.000	0.000	0.000	0.000	0.000	0.000	0.000	156	541	5137	4919	0.002	Error	Error	2570	2567	0	0	2461	2458	0	0	0	0
2	10	13	""	"iYGL208W"	8330	16760	140	1493	1400	530	80	86	41	98	96	0	1760	1682	634	261	268	83	94	94	0	0	0	0	0	0	0	0	0	0	0	0	0	0	0	0	0	0	0	0.943	0.929	0.929	0.917	2.224	0.897	0.816	0.000	0.000	0.000	0.000	0.000	0.000	0.000	0.000	0.000	0.000	0.000	0.000	0.000	0.000	156	543	2912	2741	-0.085	Error	Error	1413	1499	0	0	1320	1421	0	0	0	0
2	11	13	""	"itH(GUG)G1"	8520	16760	120	680	629	212	83	95	75	98	91	0	1471	1416	426	264	282	120	98	97	0	0	0	0	0	0	0	0	0	0	0	0	0	0	0	0	0	0	0	0.495	0.474	0.470	0.459	1.642	0.438	0.788	0.000	0.000	0.000	0.000	0.000	0.000	0.000	0.000	0.000	0.000	0.000	0.000	0.000	0.000	120	507	1804	1698	-1.016	Error	Error	597	1207	0	0	546	1152	0	0	0	0
2	12	13	""	"itK(UUU)G1"	8710	16760	130	1483	1383	426	80	85	41	100	100	0	1580	1506	470	259	269	84	96	95	0	0	0	0	0	0	0	0	0	0	0	0	0	0	0	0	0	0	0	1.062	1.045	1.048	1.119	1.776	1.021	0.849	0.000	0.000	0.000	0.000	0.000	0.000	0.000	0.000	0.000	0.000	0.000	0.000	0.000	0.000	120	531	2724	2550	0.087	Error	Error	1403	1321	0	0	1303	1247	0	0	0	0
2	13	13	""	"iYGR091W"	8890	16760	130	807	770	287	82	87	43	99	97	0	1129	1094	383	268	276	86	96	92	0	0	0	0	0	0	0	0	0	0	0	0	0	0	0	0	0	0	0	0.842	0.833	0.876	0.853	1.766	0.790	0.796	0.000	0.000	0.000	0.000	0.000	0.000	0.000	0.000	0.000	0.000	0.000	0.000	0.000	0.000	120	535	1586	1514	-0.248	Error	Error	725	861	0	0	688	826	0	0	0	0
2	14	13	""	"iYGR095C"	9080	16760	130	449	428	147	88	92	35	97	93	0	884	866	281	277	293	127	91	86	0	0	0	0	0	0	0	0	0	0	0	0	0	0	0	0	0	0	0	0.595	0.577	0.574	0.576	1.890	0.493	0.705	0.000	0.000	0.000	0.000	0.000	0.000	0.000	0.000	0.000	0.000	0.000	0.000	0.000	0.000	120	570	968	929	-0.750	Error	Error	361	607	0	0	340	589	0	0	0	0
2	15	13	""	"iYGR099W"	9280	16770	110	951	951	430	89	96	53	96	95	0	1060	1073	442	281	301	143	93	88	0	0	0	0	0	0	0	0	0	0	0	0	0	0	0	0	0	0	0	1.107	1.088	1.073	1.042	1.619	1.005	0.769	0.000	0.000	0.000	0.000	0.000	0.000	0.000	0.000	0.000	0.000	0.000	0.000	0.000	0.000	80	447	1641	1654	0.146	Error	Error	862	779	0	0	862	792	0	0	0	0
2	16	13	""	"iYGR111W"	9460	16760	130	1052	993	381	87	97	55	99	96	0	1261	1205	437	274	294	110	95	91	0	0	0	0	0	0	0	0	0	0	0	0	0	0	0	0	0	0	0	0.978	0.973	0.941	0.991	1.905	0.922	0.795	0.000	0.000	0.000	0.000	0.000	0.000	0.000	0.000	0.000	0.000	0.000	0.000	0.000	0.000	120	536	1952	1837	-0.033	Error	Error	965	987	0	0	906	931	0	0	0	0
2	17	13	""	"iYGR117C"	9660	16760	130	1041	1083	499	88	97	50	100	100	0	1459	1493	561	270	292	114	96	95	0	0	0	0	0	0	0	0	0	0	0	0	0	0	0	0	0	0	0	0.802	0.814	0.850	0.832	1.763	0.822	0.835	0.000	0.000	0.000	0.000	0.000	0.000	0.000	0.000	0.000	0.000	0.000	0.000	0.000	0.000	120	513	2142	2218	-0.319	Error	Error	953	1189	0	0	995	1223	0	0	0	0
2	18	13	""	"itN(GUU)G"	9840	16760	130	406	400	136	83	84	31	97	97	0	665	677	208	264	273	85	93	91	0	0	0	0	0	0	0	0	0	0	0	0	0	0	0	0	0	0	0	0.805	0.768	0.785	0.745	1.690	0.657	0.678	0.000	0.000	0.000	0.000	0.000	0.000	0.000	0.000	0.000	0.000	0.000	0.000	0.000	0.000	120	541	724	730	-0.312	Error	Error	323	401	0	0	317	413	0	0	0	0
2	19	13	""	"iYGR133W"	10040	16770	130	1220	1156	419	80	123	320	92	82	0	1078	1062	330	265	304	317	92	70	0	0	0	0	0	0	0	0	0	0	0	0	0	0	0	0	0	0	0	1.402	1.350	1.386	1.342	1.557	1.379	0.799	0.000	0.000	0.000	0.000	0.000	0.000	0.000	0.000	0.000	0.000	0.000	0.000	0.000	0.000	120	563	1953	1873	0.488	Error	Error	1140	813	0	0	1076	797	0	0	0	0
2	20	13	""	"iYGR138C"	10230	16760	130	302	290	106	79	133	352	10	0	0	502	516	178	266	318	355	29	0	0	0	0	0	0	0	0	0	0	0	0	0	0	0	0	0	0	0	0	0.945	0.844	0.920	0.832	2.321	0.973	0.841	0.000	0.000	0.000	0.000	0.000	0.000	0.000	0.000	0.000	0.000	0.000	0.000	0.000	0.000	120	517	459	461	-0.082	Error	Error	223	236	0	0	211	250	0	0	0	0
2	21	13	""	"iYGR142W"	10420	16770	130	851	848	369	78	80	27	100	99	0	1584	1617	683	261	270	80	98	95	0	0	0	0	0	0	0	0	0	0	0	0	0	0	0	0	0	0	0	0.584	0.568	0.581	0.594	1.802	0.533	0.836	0.000	0.000	0.000	0.000	0.000	0.000	0.000	0.000	0.000	0.000	0.000	0.000	0.000	0.000	120	538	2096	2126	-0.775	Error	Error	773	1323	0	0	770	1356	0	0	0	0
2	22	13	""	"iYGR154C"	10610	16770	130	1400	1401	583	81	84	29	100	99	0	1377	1378	511	269	277	83	95	95	0	0	0	0	0	0	0	0	0	0	0	0	0	0	0	0	0	0	0	1.190	1.190	1.165	1.191	1.623	1.177	0.836	0.000	0.000	0.000	0.000	0.000	0.000	0.000	0.000	0.000	0.000	0.000	0.000	0.000	0.000	120	689	2427	2429	0.251	Error	Error	1319	1108	0	0	1320	1109	0	0	0	0
2	1	14	""	"iYGR158C"	6620	16950	130	1433	1307	464	71	74	46	100	99	0	3178	2991	1057	252	259	78	96	96	0	0	0	0	0	0	0	0	0	0	0	0	0	0	0	0	0	0	0	0.465	0.451	0.452	0.439	1.500	0.427	0.854	0.000	0.000	0.000	0.000	0.000	0.000	0.000	0.000	0.000	0.000	0.000	0.000	0.000	0.000	120	644	4288	3975	-1.103	Error	Error	1362	2926	0	0	1236	2739	0	0	0	0
2	2	14	""	"iYGRCdelta30"	6800	16950	130	877	838	287	73	76	28	98	95	0	1380	1307	447	262	266	80	96	95	0	0	0	0	0	0	0	0	0	0	0	0	0	0	0	0	0	0	0	0.719	0.732	0.728	0.724	1.855	0.689	0.786	0.000	0.000	0.000	0.000	0.000	0.000	0.000	0.000	0.000	0.000	0.000	0.000	0.000	0.000	120	545	1922	1810	-0.476	Error	Error	804	1118	0	0	765	1045	0	0	0	0
2	3	14	""	"iYHR094C"	7000	16950	130	1472	1459	559	81	84	34	98	98	0	1634	1569	586	259	268	86	96	96	0	0	0	0	0	0	0	0	0	0	0	0	0	0	0	0	0	0	0	1.012	1.052	1.061	1.015	1.675	1.026	0.811	0.000	0.000	0.000	0.000	0.000	0.000	0.000	0.000	0.000	0.000	0.000	0.000	0.000	0.000	120	562	2766	2688	0.017	Error	Error	1391	1375	0	0	1378	1310	0	0	0	0
2	4	14	""	"iYHR098C"	7200	16950	130	2471	2471	1192	80	85	37	100	98	0	1796	1832	832	254	270	87	95	95	0	0	0	0	0	0	0	0	0	0	0	0	0	0	0	0	0	0	0	1.551	1.515	1.499	1.448	1.865	1.556	0.793	0.000	0.000	0.000	0.000	0.000	0.000	0.000	0.000	0.000	0.000	0.000	0.000	0.000	0.000	120	507	3933	3969	0.633	Error	Error	2391	1542	0	0	2391	1578	0	0	0	0
2	5	14	""	"iYHR102W"	7380	16950	130	1483	1688	872	79	83	33	98	97	0	2189	2230	1170	262	274	86	94	91	0	0	0	0	0	0	0	0	0	0	0	0	0	0	0	0	0	0	0	0.729	0.818	0.784	0.822	1.828	0.771	0.815	0.000	0.000	0.000	0.000	0.000	0.000	0.000	0.000	0.000	0.000	0.000	0.000	0.000	0.000	120	501	3331	3577	-0.457	Error	Error	1404	1927	0	0	1609	1968	0	0	0	0
2	6	14	""	"iYHR119W"	7570	16950	120	1589	1431	497	83	86	32	99	97	0	2130	2029	670	263	271	86	98	96	0	0	0	0	0	0	0	0	0	0	0	0	0	0	0	0	0	0	0	0.807	0.763	0.755	0.742	1.790	0.732	0.843	0.000	0.000	0.000	0.000	0.000	0.000	0.000	0.000	0.000	0.000	0.000	0.000	0.000	0.000	120	511	3373	3114	-0.310	Error	Error	1506	1867	0	0	1348	1766	0	0	0	0
2	7	14	""	"iYHR123W"	7770	16960	120	800	807	411	84	87	34	96	95	0	3277	3081	1670	257	271	113	91	90	0	0	0	0	0	0	0	0	0	0	0	0	0	0	0	0	0	0	0	0.237	0.256	0.254	0.263	2.328	0.219	0.758	0.000	0.000	0.000	0.000	0.000	0.000	0.000	0.000	0.000	0.000	0.000	0.000	0.000	0.000	120	459	3736	3547	-2.077	Error	Error	716	3020	0	0	723	2824	0	0	0	0
2	8	14	""	"iYHR127W"	7950	16950	130	477	489	202	82	84	32	95	94	0	1308	1321	559	255	269	105	92	91	0	0	0	0	0	0	0	0	0	0	0	0	0	0	0	0	0	0	0	0.375	0.382	0.369	0.362	1.948	0.330	0.742	0.000	0.000	0.000	0.000	0.000	0.000	0.000	0.000	0.000	0.000	0.000	0.000	0.000	0.000	120	510	1448	1473	-1.415	Error	Error	395	1053	0	0	407	1066	0	0	0	0
2	9	14	""	"iYHR143W"	8140	16950	130	1234	1309	691	81	86	44	100	99	0	1785	1962	920	257	266	78	99	97	0	0	0	0	0	0	0	0	0	0	0	0	0	0	0	0	0	0	0	0.755	0.720	0.713	0.720	1.590	0.693	0.819	0.000	0.000	0.000	0.000	0.000	0.000	0.000	0.000	0.000	0.000	0.000	0.000	0.000	0.000	120	497	2681	2933	-0.406	Error	Error	1153	1528	0	0	1228	1705	0	0	0	0
2	10	14	""	"iYHRCdelta11"	8340	16960	130	1097	1055	421	84	91	48	100	100	0	1162	1313	1097	264	276	86	95	95	0	0	0	0	0	0	0	0	0	0	0	0	0	0	0	0	0	0	0	1.128	0.926	0.985	1.019	1.972	0.566	0.465	0.000	0.000	0.000	0.000	0.000	0.000	0.000	0.000	0.000	0.000	0.000	0.000	0.000	0.000	120	512	1911	2020	0.174	Error	Error	1013	898	0	0	971	1049	0	0	0	0
2	11	14	""	"iYHR149C"	8520	16970	110	902	972	460	93	109	105	100	96	0	1291	1250	481	277	305	164	97	88	0	0	0	0	0	0	0	0	0	0	0	0	0	0	0	0	0	0	0	0.798	0.903	0.890	0.893	1.618	0.881	0.770	0.000	0.000	0.000	0.000	0.000	0.000	0.000	0.000	0.000	0.000	0.000	0.000	0.000	0.000	80	450	1823	1852	-0.326	Error	Error	809	1014	0	0	879	973	0	0	0	0
2	12	14	""	"iYHR164C"	8720	16960	130	1405	1304	432	88	106	110	98	97	0	2139	2013	708	275	308	182	95	92	0	0	0	0	0	0	0	0	0	0	0	0	0	0	0	0	0	0	0	0.707	0.700	0.712	0.719	1.808	0.652	0.844	0.000	0.000	0.000	0.000	0.000	0.000	0.000	0.000	0.000	0.000	0.000	0.000	0.000	0.000	120	551	3181	2954	-0.501	Error	Error	1317	1864	0	0	1216	1738	0	0	0	0
2	13	14	""	"iYHR168W"	8910	16960	130	966	884	319	87	90	33	99	99	0	1062	1049	352	272	280	89	93	91	0	0	0	0	0	0	0	0	0	0	0	0	0	0	0	0	0	0	0	1.113	1.026	1.016	1.030	1.839	0.966	0.759	0.000	0.000	0.000	0.000	0.000	0.000	0.000	0.000	0.000	0.000	0.000	0.000	0.000	0.000	120	486	1669	1574	0.154	Error	Error	879	790	0	0	797	777	0	0	0	0
2	14	14	""	"iYHR173C"	9090	16960	120	456	442	148	86	90	34	97	95	0	656	668	254	277	290	128	87	74	0	0	0	0	0	0	0	0	0	0	0	0	0	0	0	0	0	0	0	0.976	0.910	0.955	0.918	2.051	0.698	0.640	0.000	0.000	0.000	0.000	0.000	0.000	0.000	0.000	0.000	0.000	0.000	0.000	0.000	0.000	120	475	749	747	-0.035	Error	Error	370	379	0	0	356	391	0	0	0	0
2	15	14	""	"itT(AGU)J"	9290	16950	120	618	599	233	87	96	48	93	91	0	874	907	321	283	306	143	93	85	0	0	0	0	0	0	0	0	0	0	0	0	0	0	0	0	0	0	0	0.898	0.821	0.843	0.844	1.727	0.748	0.712	0.000	0.000	0.000	0.000	0.000	0.000	0.000	0.000	0.000	0.000	0.000	0.000	0.000	0.000	120	505	1122	1136	-0.154	Error	Error	531	591	0	0	512	624	0	0	0	0
2	16	14	""	"iYJL197W"	9470	16950	130	895	851	325	93	109	71	98	96	0	1901	1913	645	296	328	174	96	95	0	0	0	0	0	0	0	0	0	0	0	0	0	0	0	0	0	0	0	0.500	0.469	0.473	0.472	1.558	0.438	0.856	0.000	0.000	0.000	0.000	0.000	0.000	0.000	0.000	0.000	0.000	0.000	0.000	0.000	0.000	120	528	2407	2375	-1.001	Error	Error	802	1605	0	0	758	1617	0	0	0	0
2	17	14	""	"iYJL192C"	9660	16950	130	917	859	306	107	144	115	97	90	0	1131	1088	353	322	398	274	89	80	0	0	0	0	0	0	0	0	0	0	0	0	0	0	0	0	0	0	0	1.001	0.982	1.016	0.977	1.654	0.845	0.699	0.000	0.000	0.000	0.000	0.000	0.000	0.000	0.000	0.000	0.000	0.000	0.000	0.000	0.000	120	560	1619	1518	0.002	Error	Error	810	809	0	0	752	766	0	0	0	0
2	18	14	""	"iYJL173C"	9860	16960	130	2346	2223	720	106	147	122	100	100	0	3079	3018	893	322	406	368	99	96	0	0	0	0	0	0	0	0	0	0	0	0	0	0	0	0	0	0	0	0.812	0.785	0.783	0.790	1.428	0.761	0.856	0.000	0.000	0.000	0.000	0.000	0.000	0.000	0.000	0.000	0.000	0.000	0.000	0.000	0.000	120	529	4997	4813	-0.300	Error	Error	2240	2757	0	0	2117	2696	0	0	0	0
2	19	14	""	"iYJL168C"	10050	16950	130	1726	1668	617	89	111	95	99	97	0	1411	1362	464	292	331	298	92	87	0	0	0	0	0	0	0	0	0	0	0	0	0	0	0	0	0	0	0	1.463	1.476	1.518	1.492	1.667	1.526	0.795	0.000	0.000	0.000	0.000	0.000	0.000	0.000	0.000	0.000	0.000	0.000	0.000	0.000	0.000	120	555	2756	2649	0.549	Error	Error	1637	1119	0	0	1579	1070	0	0	0	0
2	20	14	""	"iYJL164C"	10240	16950	130	1107	1216	704	82	88	49	99	98	0	1520	1584	809	267	279	89	96	91	0	0	0	0	0	0	0	0	0	0	0	0	0	0	0	0	0	0	0	0.818	0.861	0.873	0.899	1.909	0.846	0.833	0.000	0.000	0.000	0.000	0.000	0.000	0.000	0.000	0.000	0.000	0.000	0.000	0.000	0.000	120	518	2278	2451	-0.290	Error	Error	1025	1253	0	0	1134	1317	0	0	0	0
2	21	14	""	"isnR128"	10420	16960	130	308	304	92	83	91	55	95	90	0	668	669	202	272	287	99	91	84	0	0	0	0	0	0	0	0	0	0	0	0	0	0	0	0	0	0	0	0.568	0.557	0.564	0.568	2.005	0.421	0.554	0.000	0.000	0.000	0.000	0.000	0.000	0.000	0.000	0.000	0.000	0.000	0.000	0.000	0.000	120	556	621	618	-0.816	Error	Error	225	396	0	0	221	397	0	0	0	0
2	22	14	""	"iYJL146W"	10610	16960	130	1354	1288	535	84	89	40	100	100	0	1678	1629	678	279	290	99	98	94	0	0	0	0	0	0	0	0	0	0	0	0	0	0	0	0	0	0	0	0.908	0.892	0.860	0.963	1.743	0.836	0.797	0.000	0.000	0.000	0.000	0.000	0.000	0.000	0.000	0.000	0.000	0.000	0.000	0.000	0.000	120	676	2669	2554	-0.140	Error	Error	1270	1399	0	0	1204	1350	0	0	0	0
2	1	15	""	"iYJL141C"	6600	17140	130	1647	1623	806	78	83	36	98	97	0	2115	2116	978	272	284	88	94	92	0	0	0	0	0	0	0	0	0	0	0	0	0	0	0	0	0	0	0	0.851	0.838	0.857	0.834	1.597	0.821	0.870	0.000	0.000	0.000	0.000	0.000	0.000	0.000	0.000	0.000	0.000	0.000	0.000	0.000	0.000	120	623	3412	3389	-0.232	Error	Error	1569	1843	0	0	1545	1844	0	0	0	0
2	2	15	""	"iYJL125C"	6800	17140	130	1472	1337	537	77	82	36	100	99	0	1729	1702	651	273	280	85	95	94	0	0	0	0	0	0	0	0	0	0	0	0	0	0	0	0	0	0	0	0.958	0.882	0.873	0.879	1.718	0.854	0.835	0.000	0.000	0.000	0.000	0.000	0.000	0.000	0.000	0.000	0.000	0.000	0.000	0.000	0.000	120	518	2851	2689	-0.062	Error	Error	1395	1456	0	0	1260	1429	0	0	0	0
2	3	15	""	"iYJL120W"	6980	17140	120	603	565	259	81	83	29	95	92	0	765	752	294	271	274	80	88	80	0	0	0	0	0	0	0	0	0	0	0	0	0	0	0	0	0	0	0	1.057	1.006	1.031	1.052	2.042	0.914	0.704	0.000	0.000	0.000	0.000	0.000	0.000	0.000	0.000	0.000	0.000	0.000	0.000	0.000	0.000	120	492	1016	965	0.080	Error	Error	522	494	0	0	484	481	0	0	0	0
2	4	15	""	"iYJL115W"	7180	17140	130	852	787	304	81	90	83	92	90	0	1625	1555	577	263	275	95	95	92	0	0	0	0	0	0	0	0	0	0	0	0	0	0	0	0	0	0	0	0.566	0.546	0.528	0.521	1.878	0.517	0.807	0.000	0.000	0.000	0.000	0.000	0.000	0.000	0.000	0.000	0.000	0.000	0.000	0.000	0.000	120	542	2133	1998	-0.821	Error	Error	771	1362	0	0	706	1292	0	0	0	0
2	5	15	""	"iYKL211C"	7370	17140	130	1376	1449	662	77	81	31	100	100	0	1288	1330	481	258	272	84	100	99	0	0	0	0	0	0	0	0	0	0	0	0	0	0	0	0	0	0	0	1.261	1.280	1.299	1.243	1.529	1.332	0.818	0.000	0.000	0.000	0.000	0.000	0.000	0.000	0.000	0.000	0.000	0.000	0.000	0.000	0.000	120	518	2329	2444	0.335	Error	Error	1299	1030	0	0	1372	1072	0	0	0	0
2	6	15	""	"itT(CGU)K"	7550	17150	130	1087	1042	379	80	82	30	100	100	0	1169	1179	446	260	272	82	94	92	0	0	0	0	0	0	0	0	0	0	0	0	0	0	0	0	0	0	0	1.108	1.047	1.058	1.083	1.826	0.985	0.788	0.000	0.000	0.000	0.000	0.000	0.000	0.000	0.000	0.000	0.000	0.000	0.000	0.000	0.000	120	528	1916	1881	0.148	Error	Error	1007	909	0	0	962	919	0	0	0	0
2	7	15	""	"iYKL205W"	7750	17140	140	1000	916	412	82	83	33	99	96	0	1677	1536	620	253	264	85	92	92	0	0	0	0	0	0	0	0	0	0	0	0	0	0	0	0	0	0	0	0.645	0.650	0.629	0.640	2.019	0.628	0.835	0.000	0.000	0.000	0.000	0.000	0.000	0.000	0.000	0.000	0.000	0.000	0.000	0.000	0.000	156	534	2342	2117	-0.633	Error	Error	918	1424	0	0	834	1283	0	0	0	0
2	8	15	""	"iYKLCdelta2"	7920	17140	120	359	351	114	82	84	32	97	94	0	857	841	259	252	266	88	95	92	0	0	0	0	0	0	0	0	0	0	0	0	0	0	0	0	0	0	0	0.458	0.457	0.465	0.453	1.773	0.381	0.698	0.000	0.000	0.000	0.000	0.000	0.000	0.000	0.000	0.000	0.000	0.000	0.000	0.000	0.000	120	427	882	858	-1.127	Error	Error	277	605	0	0	269	589	0	0	0	0
2	9	15	""	"iYKL187C"	8120	17140	140	924	976	488	87	95	51	98	98	0	1351	1353	617	271	284	101	92	91	0	0	0	0	0	0	0	0	0	0	0	0	0	0	0	0	0	0	0	0.775	0.822	0.797	0.907	2.200	0.786	0.766	0.000	0.000	0.000	0.000	0.000	0.000	0.000	0.000	0.000	0.000	0.000	0.000	0.000	0.000	156	572	1917	1971	-0.368	Error	Error	837	1080	0	0	889	1082	0	0	0	0
2	10	15	""	"iYKL183W"	8300	17140	140	1176	1229	516	93	98	45	99	98	0	1037	1152	933	278	287	94	96	93	0	0	0	0	0	0	0	0	0	0	0	0	0	0	0	0	0	0	0	1.427	1.300	1.417	1.373	1.748	0.871	0.530	0.000	0.000	0.000	0.000	0.000	0.000	0.000	0.000	0.000	0.000	0.000	0.000	0.000	0.000	156	523	1842	2010	0.513	Error	Error	1083	759	0	0	1136	874	0	0	0	0
2	11	15	""	"iYKL166C-1"	8490	17140	130	1264	1323	565	97	103	51	100	100	0	2221	2231	822	291	299	96	98	96	0	0	0	0	0	0	0	0	0	0	0	0	0	0	0	0	0	0	0	0.605	0.632	0.630	0.645	1.662	0.604	0.830	0.000	0.000	0.000	0.000	0.000	0.000	0.000	0.000	0.000	0.000	0.000	0.000	0.000	0.000	120	479	3097	3166	-0.726	Error	Error	1167	1930	0	0	1226	1940	0	0	0	0
2	12	15	""	"iYKL164C-1"	8670	17140	130	1627	1647	550	98	110	84	100	100	0	1559	1583	518	299	325	166	99	96	0	0	0	0	0	0	0	0	0	0	0	0	0	0	0	0	0	0	0	1.213	1.206	1.215	1.221	1.541	1.194	0.814	0.000	0.000	0.000	0.000	0.000	0.000	0.000	0.000	0.000	0.000	0.000	0.000	0.000	0.000	120	488	2789	2833	0.279	Error	Error	1529	1260	0	0	1549	1284	0	0	0	0
2	13	15	""	"iYKL162C"	8870	17140	140	1431	1371	545	90	102	80	99	96	0	2030	2051	852	282	308	156	95	92	0	0	0	0	0	0	0	0	0	0	0	0	0	0	0	0	0	0	0	0.767	0.724	0.742	0.771	1.995	0.677	0.824	0.000	0.000	0.000	0.000	0.000	0.000	0.000	0.000	0.000	0.000	0.000	0.000	0.000	0.000	156	535	3089	3050	-0.382	Error	Error	1341	1748	0	0	1281	1769	0	0	0	0
2	14	15	""	"iYKL148C"	9060	17140	120	796	783	269	85	90	36	100	99	0	750	758	244	276	283	86	93	90	0	0	0	0	0	0	0	0	0	0	0	0	0	0	0	0	0	0	0	1.500	1.448	1.466	1.591	2.041	1.340	0.689	0.000	0.000	0.000	0.000	0.000	0.000	0.000	0.000	0.000	0.000	0.000	0.000	0.000	0.000	120	415	1185	1180	0.585	Error	Error	711	474	0	0	698	482	0	0	0	0
2	15	15	""	"iYKL143W"	9230	17140	130	841	815	214	83	93	54	100	100	0	951	963	262	279	294	111	96	95	0	0	0	0	0	0	0	0	0	0	0	0	0	0	0	0	0	0	0	1.128	1.070	1.065	1.105	1.614	1.006	0.749	0.000	0.000	0.000	0.000	0.000	0.000	0.000	0.000	0.000	0.000	0.000	0.000	0.000	0.000	120	517	1430	1416	0.174	Error	Error	758	672	0	0	732	684	0	0	0	0
2	16	15	""	"iYKL139W"	9440	17140	130	1223	1309	575	83	97	69	100	100	0	4891	5213	2533	276	305	165	100	100	0	0	0	0	0	0	0	0	0	0	0	0	0	0	0	0	0	0	0	0.247	0.248	0.252	0.257	1.499	0.228	0.885	0.000	0.000	0.000	0.000	0.000	0.000	0.000	0.000	0.000	0.000	0.000	0.000	0.000	0.000	120	608	5755	6163	-2.017	Error	Error	1140	4615	0	0	1226	4937	0	0	0	0
2	17	15	""	"iYLL025W"	9640	17140	120	1054	1062	333	123	174	129	100	97	0	2559	2515	721	368	484	319	98	97	0	0	0	0	0	0	0	0	0	0	0	0	0	0	0	0	0	0	0	0.425	0.437	0.436	0.442	1.618	0.402	0.819	0.000	0.000	0.000	0.000	0.000	0.000	0.000	0.000	0.000	0.000	0.000	0.000	0.000	0.000	120	521	3122	3086	-1.235	Error	Error	931	2191	0	0	939	2147	0	0	-100	0
2	18	15	""	"iYLL021W"	9850	17140	150	314	304	128	155	197	138	55	14	0	796	811	363	453	542	402	46	9	0	0	0	0	0	0	0	0	0	0	0	0	0	0	0	0	0	0	0	0.464	0.416	0.400	0.453	2.605	0.215	0.374	0.000	0.000	0.000	0.000	0.000	0.000	0.000	0.000	0.000	0.000	0.000	0.000	0.000	0.000	156	558	502	507	-1.109	Error	Error	159	343	0	0	149	358	0	0	-50	0
2	19	15	""	"iYLL017W"	10000	17150	110	936	998	386	93	117	101	100	100	0	1142	1165	370	299	349	345	97	60	0	0	0	0	0	0	0	0	0	0	0	0	0	0	0	0	0	0	0	1.000	1.045	1.033	1.053	1.366	0.760	0.546	0.000	0.000	0.000	0.000	0.000	0.000	0.000	0.000	0.000	0.000	0.000	0.000	0.000	0.000	80	394	1686	1771	0.000	Error	Error	843	843	0	0	905	866	0	0	0	0
2	20	15	""	"iYLL001W"	10200	17140	130	965	941	311	86	99	80	100	99	0	3023	2934	965	284	305	159	100	100	0	0	0	0	0	0	0	0	0	0	0	0	0	0	0	0	0	0	0	0.321	0.323	0.316	0.323	1.371	0.296	0.867	0.000	0.000	0.000	0.000	0.000	0.000	0.000	0.000	0.000	0.000	0.000	0.000	0.000	0.000	120	596	3618	3505	-1.640	Error	Error	879	2739	0	0	855	2650	0	0	0	0
2	21	15	""	"iYLR003C"	10370	17150	110	457	471	109	89	100	64	100	100	0	668	692	192	283	302	108	97	91	0	0	0	0	0	0	0	0	0	0	0	0	0	0	0	0	0	0	0	0.956	0.934	0.955	0.970	1.592	0.735	0.604	0.000	0.000	0.000	0.000	0.000	0.000	0.000	0.000	0.000	0.000	0.000	0.000	0.000	0.000	80	470	753	791	-0.065	Error	Error	368	385	0	0	382	409	0	0	0	0
2	22	15	""	"iYLR007W"	10570	17150	110	552	561	137	88	99	55	100	100	0	965	1021	543	279	300	116	98	96	0	0	0	0	0	0	0	0	0	0	0	0	0	0	0	0	0	0	0	0.676	0.637	0.718	0.709	1.679	0.457	0.596	0.000	0.000	0.000	0.000	0.000	0.000	0.000	0.000	0.000	0.000	0.000	0.000	0.000	0.000	80	528	1150	1215	-0.564	Error	Error	464	686	0	0	473	742	0	0	0	0
2	1	16	""	"iYLR024C"	6590	17330	120	900	1043	579	73	78	29	100	99	0	929	1057	540	264	273	86	94	93	0	0	0	0	0	0	0	0	0	0	0	0	0	0	0	0	0	0	0	1.244	1.223	1.258	1.284	1.829	1.193	0.718	0.000	0.000	0.000	0.000	0.000	0.000	0.000	0.000	0.000	0.000	0.000	0.000	0.000	0.000	120	523	1492	1763	0.315	Error	Error	827	665	0	0	970	793	0	0	0	0
2	2	16	""	"iYLR028C"	6770	17320	130	1269	1389	548	69	76	34	100	99	0	1527	1513	567	258	266	87	94	94	0	0	0	0	0	0	0	0	0	0	0	0	0	0	0	0	0	0	0	0.946	1.052	1.060	1.107	1.904	1.024	0.860	0.000	0.000	0.000	0.000	0.000	0.000	0.000	0.000	0.000	0.000	0.000	0.000	0.000	0.000	120	517	2469	2575	-0.081	Error	Error	1200	1269	0	0	1320	1255	0	0	0	0
2	3	16	""	"iYLR032W"	6960	17330	130	932	953	359	74	78	32	100	99	0	1936	1821	713	253	259	84	96	96	0	0	0	0	0	0	0	0	0	0	0	0	0	0	0	0	0	0	0	0.510	0.561	0.550	0.577	1.712	0.507	0.829	0.000	0.000	0.000	0.000	0.000	0.000	0.000	0.000	0.000	0.000	0.000	0.000	0.000	0.000	120	529	2541	2447	-0.972	Error	Error	858	1683	0	0	879	1568	0	0	0	0
2	4	16	""	"iYLR044C"	7150	17320	130	2583	2581	948	78	96	123	100	98	0	2398	2323	759	256	274	145	97	96	0	0	0	0	0	0	0	0	0	0	0	0	0	0	0	0	0	0	0	1.169	1.211	1.219	1.207	1.500	1.187	0.866	0.000	0.000	0.000	0.000	0.000	0.000	0.000	0.000	0.000	0.000	0.000	0.000	0.000	0.000	120	525	4647	4570	0.226	Error	Error	2505	2142	0	0	2503	2067	0	0	0	0
2	5	16	""	"iYLR048W"	7350	17330	130	863	826	344	77	94	123	97	89	0	1809	1803	675	260	279	143	99	96	0	0	0	0	0	0	0	0	0	0	0	0	0	0	0	0	0	0	0	0.507	0.485	0.492	0.480	1.595	0.458	0.797	0.000	0.000	0.000	0.000	0.000	0.000	0.000	0.000	0.000	0.000	0.000	0.000	0.000	0.000	120	522	2335	2292	-0.979	Error	Error	786	1549	0	0	749	1543	0	0	0	0
2	6	16	""	"iYLR052W"	7540	17330	130	833	809	268	75	77	27	100	100	0	1011	1000	319	254	261	73	96	94	0	0	0	0	0	0	0	0	0	0	0	0	0	0	0	0	0	0	0	1.001	0.984	0.974	1.007	1.572	0.931	0.795	0.000	0.000	0.000	0.000	0.000	0.000	0.000	0.000	0.000	0.000	0.000	0.000	0.000	0.000	120	524	1515	1480	0.002	Error	Error	758	757	0	0	734	746	0	0	0	0
2	7	16	""	"iYLR364W"	7740	17330	130	2035	1991	671	76	78	28	100	100	0	1653	1631	598	246	256	74	98	97	0	0	0	0	0	0	0	0	0	0	0	0	0	0	0	0	0	0	0	1.392	1.383	1.390	1.401	1.566	1.364	0.797	0.000	0.000	0.000	0.000	0.000	0.000	0.000	0.000	0.000	0.000	0.000	0.000	0.000	0.000	120	536	3366	3300	0.477	Error	Error	1959	1407	0	0	1915	1385	0	0	0	0
2	8	16	""	"iYLR369W"	7930	17330	120	814	787	239	83	90	48	98	96	0	1488	1426	497	263	276	103	91	91	0	0	0	0	0	0	0	0	0	0	0	0	0	0	0	0	0	0	0	0.597	0.605	0.590	0.620	1.751	0.532	0.807	0.000	0.000	0.000	0.000	0.000	0.000	0.000	0.000	0.000	0.000	0.000	0.000	0.000	0.000	120	517	1956	1867	-0.745	Error	Error	731	1225	0	0	704	1163	0	0	0	0
2	9	16	""	"iYLR373C"	8120	17340	110	444	441	115	90	99	53	100	97	0	605	613	153	281	294	107	95	76	0	0	0	0	0	0	0	0	0	0	0	0	0	0	0	0	0	0	0	1.093	1.057	0.979	1.082	1.708	0.869	0.552	0.000	0.000	0.000	0.000	0.000	0.000	0.000	0.000	0.000	0.000	0.000	0.000	0.000	0.000	80	446	678	683	0.128	Error	Error	354	324	0	0	351	332	0	0	0	0
2	10	16	""	"iYLR389C"	8310	17330	130	1462	1405	367	93	101	55	100	100	0	1154	1145	356	284	292	94	95	93	0	0	0	0	0	0	0	0	0	0	0	0	0	0	0	0	0	0	0	1.574	1.524	1.507	1.605	1.541	1.472	0.812	0.000	0.000	0.000	0.000	0.000	0.000	0.000	0.000	0.000	0.000	0.000	0.000	0.000	0.000	120	554	2239	2173	0.654	Error	Error	1369	870	0	0	1312	861	0	0	0	0
2	11	16	""	"iYLR394W"	8510	17330	130	1705	1634	510	95	102	55	100	100	0	5177	5054	1644	290	300	97	100	100	0	0	0	0	0	0	0	0	0	0	0	0	0	0	0	0	0	0	0	0.329	0.323	0.327	0.327	1.411	0.303	0.896	0.000	0.000	0.000	0.000	0.000	0.000	0.000	0.000	0.000	0.000	0.000	0.000	0.000	0.000	120	533	6497	6303	-1.602	Error	Error	1610	4887	0	0	1539	4764	0	0	0	0
2	12	16	""	"iYLR398C"	8690	17330	130	1433	1432	511	90	98	54	100	100	0	1647	1611	518	287	302	117	100	99	0	0	0	0	0	0	0	0	0	0	0	0	0	0	0	0	0	0	0	0.988	1.014	1.064	1.032	1.450	0.993	0.823	0.000	0.000	0.000	0.000	0.000	0.000	0.000	0.000	0.000	0.000	0.000	0.000	0.000	0.000	120	532	2703	2666	-0.018	Error	Error	1343	1360	0	0	1342	1324	0	0	0	0
2	13	16	""	"iYLR412W-1"	8890	17330	130	1409	1426	489	83	88	36	100	100	0	1893	1869	572	270	281	89	100	99	0	0	0	0	0	0	0	0	0	0	0	0	0	0	0	0	0	0	0	0.817	0.840	0.833	0.846	1.400	0.816	0.830	0.000	0.000	0.000	0.000	0.000	0.000	0.000	0.000	0.000	0.000	0.000	0.000	0.000	0.000	120	536	2949	2942	-0.292	Error	Error	1326	1623	0	0	1343	1599	0	0	0	0
2	14	16	""	"iYLR417W"	9070	17330	120	888	840	254	77	81	28	100	100	0	1732	1647	526	266	274	81	99	98	0	0	0	0	0	0	0	0	0	0	0	0	0	0	0	0	0	0	0	0.553	0.552	0.548	0.577	1.600	0.511	0.865	0.000	0.000	0.000	0.000	0.000	0.000	0.000	0.000	0.000	0.000	0.000	0.000	0.000	0.000	120	490	2277	2144	-0.854	Error	Error	811	1466	0	0	763	1381	0	0	0	0
2	15	16	""	"iYLRCdelta24"	9270	17330	130	872	812	259	73	78	41	99	99	0	1171	1149	328	260	268	89	100	97	0	0	0	0	0	0	0	0	0	0	0	0	0	0	0	0	0	0	0	0.877	0.831	0.832	0.832	1.505	0.813	0.836	0.000	0.000	0.000	0.000	0.000	0.000	0.000	0.000	0.000	0.000	0.000	0.000	0.000	0.000	120	601	1710	1628	-0.189	Error	Error	799	911	0	0	739	889	0	0	0	0
2	16	16	""	"iYLR436C"	9460	17340	100	565	581	220	72	77	38	100	97	0	626	654	202	253	260	104	95	90	0	0	0	0	0	0	0	0	0	0	0	0	0	0	0	0	0	0	0	1.322	1.269	1.356	1.347	2.127	1.254	0.591	0.000	0.000	0.000	0.000	0.000	0.000	0.000	0.000	0.000	0.000	0.000	0.000	0.000	0.000	80	413	866	910	0.402	Error	Error	493	373	0	0	509	401	0	0	0	0
2	17	16	""	"iYLR439W"	9660	17350	170	376	360	174	100	169	150	73	43	0	1266	1167	612	310	474	351	73	61	0	0	0	0	0	0	0	0	0	0	0	0	0	0	0	0	0	0	0	0.289	0.303	0.296	0.315	2.238	0.279	0.661	0.000	0.000	0.000	0.000	0.000	0.000	0.000	0.000	0.000	0.000	0.000	0.000	0.000	0.000	208	623	1232	1117	-1.792	Error	Error	276	956	0	0	260	857	0	0	-100	0
2	18	16	""	"iYLR444C"	9850	17330	150	447	400	165	105	178	153	77	58	0	736	702	275	331	500	352	58	10	0	0	0	0	0	0	0	0	0	0	0	0	0	0	0	0	0	0	0	0.844	0.795	0.752	0.695	2.252	0.493	0.613	0.000	0.000	0.000	0.000	0.000	0.000	0.000	0.000	0.000	0.000	0.000	0.000	0.000	0.000	156	468	747	666	-0.244	Error	Error	342	405	0	0	295	371	0	0	-50	0
2	19	16	""	"iYMR130W"	10030	17330	130	480	462	135	80	83	30	97	97	0	2286	2197	705	262	270	84	98	96	0	0	0	0	0	0	0	0	0	0	0	0	0	0	0	0	0	0	0	0.198	0.197	0.197	0.197	1.716	0.179	0.811	0.000	0.000	0.000	0.000	0.000	0.000	0.000	0.000	0.000	0.000	0.000	0.000	0.000	0.000	120	527	2424	2317	-2.339	Error	Error	400	2024	0	0	382	1935	0	0	0	0
2	20	16	""	"iYMR134W"	10210	17340	110	1045	1371	932	82	98	109	98	98	0	2068	2627	1386	270	314	273	100	100	0	0	0	0	0	0	0	0	0	0	0	0	0	0	0	0	0	0	0	0.536	0.547	0.524	0.509	1.517	0.554	0.833	0.000	0.000	0.000	0.000	0.000	0.000	0.000	0.000	0.000	0.000	0.000	0.000	0.000	0.000	80	461	2761	3646	-0.901	Error	Error	963	1798	0	0	1289	2357	0	0	0	0
2	21	16	""	"iYMR138W"	10410	17340	130	1405	1458	561	87	101	96	100	100	0	1298	1309	448	277	318	248	97	88	0	0	0	0	0	0	0	0	0	0	0	0	0	0	0	0	0	0	0	1.291	1.328	1.326	1.316	1.488	1.241	0.752	0.000	0.000	0.000	0.000	0.000	0.000	0.000	0.000	0.000	0.000	0.000	0.000	0.000	0.000	120	582	2339	2403	0.368	Error	Error	1318	1021	0	0	1371	1032	0	0	0	0
2	22	16	""	"iYMR155W"	10590	17330	130	429	424	134	86	89	35	97	96	0	1014	986	305	270	286	95	97	95	0	0	0	0	0	0	0	0	0	0	0	0	0	0	0	0	0	0	0	0.461	0.472	0.478	0.467	1.554	0.421	0.787	0.000	0.000	0.000	0.000	0.000	0.000	0.000	0.000	0.000	0.000	0.000	0.000	0.000	0.000	120	653	1087	1054	-1.117	Error	Error	343	744	0	0	338	716	0	0	0	0
2	1	17	""	"itM(CAU)M"	6610	17520	120	519	504	154	68	71	25	100	100	0	1059	1046	291	262	269	83	97	95	0	0	0	0	0	0	0	0	0	0	0	0	0	0	0	0	0	0	0	0.566	0.556	0.566	0.567	1.732	0.501	0.784	0.000	0.000	0.000	0.000	0.000	0.000	0.000	0.000	0.000	0.000	0.000	0.000	0.000	0.000	120	570	1248	1220	-0.821	Error	Error	451	797	0	0	436	784	0	0	0	0
2	2	17	""	"iYMR161W"	6800	17520	130	1604	1531	520	67	74	38	100	99	0	5494	5104	1762	255	276	180	98	97	0	0	0	0	0	0	0	0	0	0	0	0	0	0	0	0	0	0	0	0.293	0.302	0.309	0.310	1.510	0.290	0.883	0.000	0.000	0.000	0.000	0.000	0.000	0.000	0.000	0.000	0.000	0.000	0.000	0.000	0.000	120	577	6776	6313	-1.769	Error	Error	1537	5239	0	0	1464	4849	0	0	0	0
2	3	17	""	"iYMR176W"	7000	17520	130	2327	2249	998	72	76	32	98	98	0	3739	3470	1614	247	265	180	95	90	0	0	0	0	0	0	0	0	0	0	0	0	0	0	0	0	0	0	0	0.646	0.675	0.703	0.747	1.837	0.635	0.859	0.000	0.000	0.000	0.000	0.000	0.000	0.000	0.000	0.000	0.000	0.000	0.000	0.000	0.000	120	520	5747	5400	-0.631	Error	Error	2255	3492	0	0	2177	3223	0	0	0	0
2	4	17	""	"iYMR180C"	7180	17520	140	1229	1132	427	73	87	94	96	92	0	1480	1446	593	249	265	137	96	93	0	0	0	0	0	0	0	0	0	0	0	0	0	0	0	0	0	0	0	0.939	0.885	0.898	0.857	1.942	0.813	0.733	0.000	0.000	0.000	0.000	0.000	0.000	0.000	0.000	0.000	0.000	0.000	0.000	0.000	0.000	156	555	2387	2256	-0.091	Error	Error	1156	1231	0	0	1059	1197	0	0	0	0
2	5	17	""	"iYMR183C"	7370	17520	140	1050	1068	494	72	76	29	98	97	0	1447	1452	645	253	261	78	94	90	0	0	0	0	0	0	0	0	0	0	0	0	0	0	0	0	0	0	0	0.819	0.831	0.809	0.871	2.401	0.795	0.825	0.000	0.000	0.000	0.000	0.000	0.000	0.000	0.000	0.000	0.000	0.000	0.000	0.000	0.000	156	540	2172	2195	-0.288	Error	Error	978	1194	0	0	996	1199	0	0	0	0
2	6	17	""	"iYMR198W"	7560	17520	130	4268	4143	1284	78	104	161	100	100	0	2947	2853	919	256	301	245	97	95	0	0	0	0	0	0	0	0	0	0	0	0	0	0	0	0	0	0	0	1.557	1.565	1.530	1.635	1.587	1.536	0.869	0.000	0.000	0.000	0.000	0.000	0.000	0.000	0.000	0.000	0.000	0.000	0.000	0.000	0.000	120	574	6881	6662	0.639	Error	Error	4190	2691	0	0	4065	2597	0	0	0	0
2	7	17	""	"iYMR202W"	7750	17520	120	469	452	147	82	99	142	91	77	0	955	948	340	261	290	199	90	86	0	0	0	0	0	0	0	0	0	0	0	0	0	0	0	0	0	0	0	0.558	0.539	0.542	0.527	1.654	0.513	0.740	0.000	0.000	0.000	0.000	0.000	0.000	0.000	0.000	0.000	0.000	0.000	0.000	0.000	0.000	120	516	1081	1057	-0.843	Error	Error	387	694	0	0	370	687	0	0	0	0
2	8	17	""	"iYMR206W"	7940	17520	130	1658	1614	519	85	93	50	100	99	0	2349	2266	820	274	289	103	99	99	0	0	0	0	0	0	0	0	0	0	0	0	0	0	0	0	0	0	0	0.758	0.768	0.736	0.797	1.671	0.708	0.840	0.000	0.000	0.000	0.000	0.000	0.000	0.000	0.000	0.000	0.000	0.000	0.000	0.000	0.000	120	580	3648	3521	-0.400	Error	Error	1573	2075	0	0	1529	1992	0	0	0	0
2	9	17	""	"iYNL148C"	8140	17520	120	849	782	240	84	96	60	96	95	0	917	872	289	280	293	101	91	89	0	0	0	0	0	0	0	0	0	0	0	0	0	0	0	0	0	0	0	1.201	1.179	1.129	1.150	1.579	1.043	0.733	0.000	0.000	0.000	0.000	0.000	0.000	0.000	0.000	0.000	0.000	0.000	0.000	0.000	0.000	120	519	1402	1290	0.264	Error	Error	765	637	0	0	698	592	0	0	0	0
2	10	17	""	"iYNL144C-0"	8330	17520	130	2313	2235	885	83	99	83	97	96	0	2482	2378	1020	281	294	116	95	95	0	0	0	0	0	0	0	0	0	0	0	0	0	0	0	0	0	0	0	1.013	1.026	1.030	1.069	1.785	0.994	0.846	0.000	0.000	0.000	0.000	0.000	0.000	0.000	0.000	0.000	0.000	0.000	0.000	0.000	0.000	120	545	4431	4249	0.019	Error	Error	2230	2201	0	0	2152	2097	0	0	0	0
2	11	17	""	"iYNL141W"	8520	17520	130	1044	983	303	81	97	81	96	95	0	3733	3541	1158	278	308	170	96	95	0	0	0	0	0	0	0	0	0	0	0	0	0	0	0	0	0	0	0	0.279	0.276	0.279	0.305	2.162	0.261	0.825	0.000	0.000	0.000	0.000	0.000	0.000	0.000	0.000	0.000	0.000	0.000	0.000	0.000	0.000	120	554	4418	4165	-1.843	Error	Error	963	3455	0	0	902	3263	0	0	0	0
2	12	17	""	"iYNL125C"	8710	17520	130	1348	1381	550	79	91	72	97	96	0	1252	1243	467	264	293	160	94	92	0	0	0	0	0	0	0	0	0	0	0	0	0	0	0	0	0	0	0	1.284	1.330	1.344	1.356	1.681	1.296	0.751	0.000	0.000	0.000	0.000	0.000	0.000	0.000	0.000	0.000	0.000	0.000	0.000	0.000	0.000	120	581	2257	2281	0.361	Error	Error	1269	988	0	0	1302	979	0	0	0	0
2	13	17	""	"iYNL121C"	8910	17530	130	1209	1255	590	78	104	131	97	93	0	1296	1276	554	262	302	239	88	83	0	0	0	0	0	0	0	0	0	0	0	0	0	0	0	0	0	0	0	1.094	1.161	1.121	1.200	1.840	1.117	0.804	0.000	0.000	0.000	0.000	0.000	0.000	0.000	0.000	0.000	0.000	0.000	0.000	0.000	0.000	120	598	2165	2191	0.129	Error	Error	1131	1034	0	0	1177	1014	0	0	0	0
2	14	17	""	"iYNL116W"	9090	17520	130	622	607	248	75	84	38	95	95	0	2058	1945	672	261	277	99	95	93	0	0	0	0	0	0	0	0	0	0	0	0	0	0	0	0	0	0	0	0.304	0.316	0.311	0.316	1.855	0.290	0.779	0.000	0.000	0.000	0.000	0.000	0.000	0.000	0.000	0.000	0.000	0.000	0.000	0.000	0.000	120	567	2344	2216	-1.716	Error	Error	547	1797	0	0	532	1684	0	0	0	0
2	15	17	""	"iYNL097C"	9290	17530	120	1765	1868	1008	78	83	36	98	94	0	2748	2773	1595	256	274	106	93	90	0	0	0	0	0	0	0	0	0	0	0	0	0	0	0	0	0	0	0	0.677	0.711	0.693	0.729	1.826	0.653	0.869	0.000	0.000	0.000	0.000	0.000	0.000	0.000	0.000	0.000	0.000	0.000	0.000	0.000	0.000	120	531	4179	4307	-0.563	Error	Error	1687	2492	0	0	1790	2517	0	0	0	0
2	16	17	""	"iYNL094W"	9480	17530	130	1185	1241	652	77	86	49	95	95	0	1443	1553	813	257	278	164	90	85	0	0	0	0	0	0	0	0	0	0	0	0	0	0	0	0	0	0	0	0.934	0.898	0.876	0.951	2.120	0.804	0.787	0.000	0.000	0.000	0.000	0.000	0.000	0.000	0.000	0.000	0.000	0.000	0.000	0.000	0.000	120	505	2294	2460	-0.098	Error	Error	1108	1186	0	0	1164	1296	0	0	0	0
2	17	17	""	"iYNL089C"	9660	17520	150	752	747	349	94	183	188	89	79	0	1000	1012	397	298	451	362	83	46	0	0	0	0	0	0	0	0	0	0	0	0	0	0	0	0	0	0	0	0.937	0.915	0.926	0.908	1.691	0.704	0.554	0.000	0.000	0.000	0.000	0.000	0.000	0.000	0.000	0.000	0.000	0.000	0.000	0.000	0.000	156	458	1360	1367	-0.093	Error	Error	658	702	0	0	653	714	0	0	-100	0
2	18	17	""	"iYNL073W"	9850	17530	150	563	548	199	93	172	180	88	71	0	1129	1069	426	290	427	331	83	68	0	0	0	0	0	0	0	0	0	0	0	0	0	0	0	0	0	0	0	0.560	0.584	0.581	0.610	1.848	0.490	0.741	0.000	0.000	0.000	0.000	0.000	0.000	0.000	0.000	0.000	0.000	0.000	0.000	0.000	0.000	156	488	1309	1234	-0.836	Error	Error	470	839	0	0	455	779	0	0	-50	0
2	19	17	""	"iYNL069C"	10040	17530	130	1495	1524	672	79	81	30	100	100	0	1656	1637	701	256	266	87	96	94	0	0	0	0	0	0	0	0	0	0	0	0	0	0	0	0	0	0	0	1.011	1.046	1.069	1.082	1.684	1.018	0.839	0.000	0.000	0.000	0.000	0.000	0.000	0.000	0.000	0.000	0.000	0.000	0.000	0.000	0.000	120	561	2816	2826	0.016	Error	Error	1416	1400	0	0	1445	1381	0	0	0	0
2	20	17	""	"iYNL065W"	10240	17520	130	857	818	269	82	90	76	98	95	0	3642	3377	1163	268	289	190	95	95	0	0	0	0	0	0	0	0	0	0	0	0	0	0	0	0	0	0	0	0.230	0.237	0.234	0.235	1.545	0.222	0.862	0.000	0.000	0.000	0.000	0.000	0.000	0.000	0.000	0.000	0.000	0.000	0.000	0.000	0.000	120	579	4149	3845	-2.122	Error	Error	775	3374	0	0	736	3109	0	0	0	0
2	21	17	""	"itG(GCC)O2"	10430	17530	130	594	580	207	85	89	34	97	95	0	1488	1464	604	273	285	95	93	91	0	0	0	0	0	0	0	0	0	0	0	0	0	0	0	0	0	0	0	0.419	0.416	0.428	0.427	1.665	0.363	0.800	0.000	0.000	0.000	0.000	0.000	0.000	0.000	0.000	0.000	0.000	0.000	0.000	0.000	0.000	120	543	1724	1686	-1.255	Error	Error	509	1215	0	0	495	1191	0	0	0	0
2	22	17	""	"iYOL019W"	10620	17530	130	1678	1555	544	90	94	39	100	98	0	3976	3762	1331	268	291	110	96	95	0	0	0	0	0	0	0	0	0	0	0	0	0	0	0	0	0	0	0	0.428	0.419	0.420	0.426	1.508	0.401	0.908	0.000	0.000	0.000	0.000	0.000	0.000	0.000	0.000	0.000	0.000	0.000	0.000	0.000	0.000	120	704	5296	4959	-1.223	Error	Error	1588	3708	0	0	1465	3494	0	0	0	0
2	1	18	""	"iYOL015W"	6630	17710	130	2510	2715	1360	72	89	116	99	97	0	3449	3681	1838	265	298	241	95	92	0	0	0	0	0	0	0	0	0	0	0	0	0	0	0	0	0	0	0	0.766	0.774	0.742	0.817	1.924	0.720	0.852	0.000	0.000	0.000	0.000	0.000	0.000	0.000	0.000	0.000	0.000	0.000	0.000	0.000	0.000	120	641	5622	6059	-0.385	Error	Error	2438	3184	0	0	2643	3416	0	0	0	0
2	2	18	""	"iYOL001W"	6820	17720	120	412	406	149	72	95	131	89	75	0	740	723	265	264	306	272	80	36	0	0	0	0	0	0	0	0	0	0	0	0	0	0	0	0	0	0	0	0.714	0.728	0.704	0.727	1.896	0.495	0.618	0.000	0.000	0.000	0.000	0.000	0.000	0.000	0.000	0.000	0.000	0.000	0.000	0.000	0.000	120	497	816	793	-0.485	Error	Error	340	476	0	0	334	459	0	0	0	0
2	3	18	""	"iYOR003W"	7010	17710	130	1731	1739	774	78	85	57	96	95	0	4559	4626	2220	257	269	103	95	94	0	0	0	0	0	0	0	0	0	0	0	0	0	0	0	0	0	0	0	0.384	0.380	0.383	0.397	1.807	0.349	0.853	0.000	0.000	0.000	0.000	0.000	0.000	0.000	0.000	0.000	0.000	0.000	0.000	0.000	0.000	120	564	5955	6030	-1.380	Error	Error	1653	4302	0	0	1661	4369	0	0	0	0
2	4	18	""	"iYOR007C"	7210	17720	130	1208	1184	484	75	84	58	95	94	0	1924	1748	812	256	275	122	89	86	0	0	0	0	0	0	0	0	0	0	0	0	0	0	0	0	0	0	0	0.679	0.743	0.704	0.697	1.920	0.661	0.806	0.000	0.000	0.000	0.000	0.000	0.000	0.000	0.000	0.000	0.000	0.000	0.000	0.000	0.000	120	517	2801	2601	-0.558	Error	Error	1133	1668	0	0	1109	1492	0	0	0	0
2	5	18	""	"iYOR018W"	7390	17710	130	1653	1725	896	75	93	106	97	93	0	5469	5767	2879	255	281	167	96	94	0	0	0	0	0	0	0	0	0	0	0	0	0	0	0	0	0	0	0	0.303	0.299	0.305	0.315	1.893	0.283	0.845	0.000	0.000	0.000	0.000	0.000	0.000	0.000	0.000	0.000	0.000	0.000	0.000	0.000	0.000	120	575	6792	7162	-1.724	Error	Error	1578	5214	0	0	1650	5512	0	0	0	0
2	6	18	""	"iYOR021C"	7600	17730	110	1344	1229	446	78	103	119	93	92	0	2072	1916	762	259	300	206	91	88	0	0	0	0	0	0	0	0	0	0	0	0	0	0	0	0	0	0	0	0.698	0.695	0.707	0.728	2.051	0.625	0.795	0.000	0.000	0.000	0.000	0.000	0.000	0.000	0.000	0.000	0.000	0.000	0.000	0.000	0.000	80	471	3079	2808	-0.518	Error	Error	1266	1813	0	0	1151	1657	0	0	0	0
2	7	18	""	"iYOR026W"	7770	17720	130	1333	1226	410	79	88	48	97	95	0	1409	1278	506	259	280	136	90	85	0	0	0	0	0	0	0	0	0	0	0	0	0	0	0	0	0	0	0	1.090	1.126	1.115	1.174	1.865	1.012	0.802	0.000	0.000	0.000	0.000	0.000	0.000	0.000	0.000	0.000	0.000	0.000	0.000	0.000	0.000	120	540	2404	2166	0.125	Error	Error	1254	1150	0	0	1147	1019	0	0	0	0
2	8	18	""	"iYOR042W"	7960	17720	120	407	389	148	81	90	46	92	90	0	650	636	252	263	276	90	87	84	0	0	0	0	0	0	0	0	0	0	0	0	0	0	0	0	0	0	0	0.842	0.826	0.799	0.702	2.190	0.637	0.597	0.000	0.000	0.000	0.000	0.000	0.000	0.000	0.000	0.000	0.000	0.000	0.000	0.000	0.000	120	516	713	681	-0.247	Error	Error	326	387	0	0	308	373	0	0	0	0
2	9	18	""	"iYOR045W"	8150	17710	130	861	899	396	80	89	46	95	95	0	3813	3960	1906	263	284	117	93	93	0	0	0	0	0	0	0	0	0	0	0	0	0	0	0	0	0	0	0	0.220	0.222	0.216	0.224	1.696	0.203	0.849	0.000	0.000	0.000	0.000	0.000	0.000	0.000	0.000	0.000	0.000	0.000	0.000	0.000	0.000	120	565	4331	4516	-2.184	Error	Error	781	3550	0	0	819	3697	0	0	0	0
2	10	18	""	"iYOR049C"	8340	17710	130	1429	1424	550	78	91	74	95	94	0	2756	2540	1020	265	289	133	93	93	0	0	0	0	0	0	0	0	0	0	0	0	0	0	0	0	0	0	0	0.542	0.592	0.570	0.568	1.883	0.552	0.826	0.000	0.000	0.000	0.000	0.000	0.000	0.000	0.000	0.000	0.000	0.000	0.000	0.000	0.000	120	560	3842	3621	-0.883	Error	Error	1351	2491	0	0	1346	2275	0	0	0	0
2	11	18	""	"iYOR356W"	8530	17720	120	184	190	67	75	82	38	90	72	0	597	569	212	261	279	111	81	68	0	0	0	0	0	0	0	0	0	0	0	0	0	0	0	0	0	0	0	0.324	0.373	0.364	0.375	2.383	0.249	0.443	0.000	0.000	0.000	0.000	0.000	0.000	0.000	0.000	0.000	0.000	0.000	0.000	0.000	0.000	120	515	445	423	-1.624	Error	Error	109	336	0	0	115	308	0	0	0	0
2	12	18	""	"iYOR360C"	8720	17720	130	1066	1104	564	75	93	120	97	91	0	1479	1604	841	253	279	195	90	86	0	0	0	0	0	0	0	0	0	0	0	0	0	0	0	0	0	0	0	0.808	0.762	0.726	0.793	2.025	0.704	0.842	0.000	0.000	0.000	0.000	0.000	0.000	0.000	0.000	0.000	0.000	0.000	0.000	0.000	0.000	120	601	2217	2380	-0.307	Error	Error	991	1226	0	0	1029	1351	0	0	0	0
2	13	18	""	"iYOR366W"	8920	17730	110	1372	1222	495	84	105	132	95	91	0	2246	2127	864	267	308	260	92	91	0	0	0	0	0	0	0	0	0	0	0	0	0	0	0	0	0	0	0	0.651	0.612	0.622	0.616	1.729	0.556	0.803	0.000	0.000	0.000	0.000	0.000	0.000	0.000	0.000	0.000	0.000	0.000	0.000	0.000	0.000	80	471	3267	2998	-0.620	Error	Error	1288	1979	0	0	1138	1860	0	0	0	0
2	14	18	""	"iYOR380W-1"	9110	17720	130	2478	2374	1106	82	91	46	100	100	0	3187	3089	1364	269	305	311	95	90	0	0	0	0	0	0	0	0	0	0	0	0	0	0	0	0	0	0	0	0.821	0.813	0.821	0.821	1.606	0.770	0.803	0.000	0.000	0.000	0.000	0.000	0.000	0.000	0.000	0.000	0.000	0.000	0.000	0.000	0.000	120	608	5314	5112	-0.284	Error	Error	2396	2918	0	0	2292	2820	0	0	0	0
2	15	18	""	"iYOR383C"	9300	17720	130	1920	1872	765	80	86	43	98	95	0	3240	3152	1385	259	288	308	91	90	0	0	0	0	0	0	0	0	0	0	0	0	0	0	0	0	0	0	0	0.617	0.619	0.603	0.600	1.568	0.558	0.800	0.000	0.000	0.000	0.000	0.000	0.000	0.000	0.000	0.000	0.000	0.000	0.000	0.000	0.000	120	547	4821	4685	-0.696	Error	Error	1840	2981	0	0	1792	2893	0	0	0	0
2	16	18	""	"iYOR387C-0"	9490	17720	130	1479	1507	811	81	90	53	100	98	0	2879	2848	1455	260	273	95	95	95	0	0	0	0	0	0	0	0	0	0	0	0	0	0	0	0	0	0	0	0.534	0.551	0.545	0.572	1.704	0.528	0.840	0.000	0.000	0.000	0.000	0.000	0.000	0.000	0.000	0.000	0.000	0.000	0.000	0.000	0.000	120	552	4017	4014	-0.906	Error	Error	1398	2619	0	0	1426	2588	0	0	0	0
2	17	18	""	"iYPL275W-2"	9690	17720	140	1715	1600	763	93	144	158	98	92	0	1728	1629	680	277	362	281	88	83	0	0	0	0	0	0	0	0	0	0	0	0	0	0	0	0	0	0	0	1.118	1.115	1.145	1.129	1.841	1.117	0.751	0.000	0.000	0.000	0.000	0.000	0.000	0.000	0.000	0.000	0.000	0.000	0.000	0.000	0.000	156	472	3073	2859	0.161	Error	Error	1622	1451	0	0	1507	1352	0	0	-100	0
2	18	18	""	"iYPL272C-1"	9860	17720	120	1535	1639	803	87	118	121	97	95	0	1403	1414	620	275	330	241	90	85	0	0	0	0	0	0	0	0	0	0	0	0	0	0	0	0	0	0	0	1.284	1.363	1.350	1.339	1.862	1.345	0.851	0.000	0.000	0.000	0.000	0.000	0.000	0.000	0.000	0.000	0.000	0.000	0.000	0.000	0.000	120	457	2576	2691	0.360	Error	Error	1448	1128	0	0	1552	1139	0	0	0	0
2	19	18	""	"iYPL268W"	10060	17720	130	839	794	286	82	86	35	97	95	0	1409	1375	488	259	268	83	94	93	0	0	0	0	0	0	0	0	0	0	0	0	0	0	0	0	0	0	0	0.658	0.638	0.651	0.619	1.736	0.600	0.792	0.000	0.000	0.000	0.000	0.000	0.000	0.000	0.000	0.000	0.000	0.000	0.000	0.000	0.000	120	547	1907	1828	-0.603	Error	Error	757	1150	0	0	712	1116	0	0	0	0
2	20	18	""	"iYPL253C"	10240	17720	130	994	1001	406	85	89	35	98	98	0	3157	3268	1415	264	283	100	95	95	0	0	0	0	0	0	0	0	0	0	0	0	0	0	0	0	0	0	0	0.314	0.305	0.308	0.324	1.763	0.276	0.871	0.000	0.000	0.000	0.000	0.000	0.000	0.000	0.000	0.000	0.000	0.000	0.000	0.000	0.000	120	545	3802	3920	-1.670	Error	Error	909	2893	0	0	916	3004	0	0	0	0
2	21	18	""	"iYPL249C"	10430	17720	130	1580	1823	1028	91	98	44	97	95	0	2120	2404	1329	273	291	114	92	91	0	0	0	0	0	0	0	0	0	0	0	0	0	0	0	0	0	0	0	0.806	0.813	0.767	0.793	1.948	0.777	0.852	0.000	0.000	0.000	0.000	0.000	0.000	0.000	0.000	0.000	0.000	0.000	0.000	0.000	0.000	120	601	3336	3863	-0.311	Error	Error	1489	1847	0	0	1732	2131	0	0	0	0
2	22	18	""	"iYPL245W"	10640	17730	110	361	356	149	92	99	43	93	85	0	853	840	340	270	287	103	88	87	0	0	0	0	0	0	0	0	0	0	0	0	0	0	0	0	0	0	0	0.461	0.463	0.434	0.458	2.138	0.405	0.676	0.000	0.000	0.000	0.000	0.000	0.000	0.000	0.000	0.000	0.000	0.000	0.000	0.000	0.000	80	557	852	834	-1.116	Error	Error	269	583	0	0	264	570	0	0	0	0
2	1	19	""	"iYPR067W"	6640	17900	120	849	805	299	81	94	109	95	91	0	1963	1839	673	266	291	167	95	92	0	0	0	0	0	0	0	0	0	0	0	0	0	0	0	0	0	0	0	0.453	0.460	0.455	0.477	1.959	0.432	0.838	0.000	0.000	0.000	0.000	0.000	0.000	0.000	0.000	0.000	0.000	0.000	0.000	0.000	0.000	120	596	2465	2297	-1.144	Error	Error	768	1697	0	0	724	1573	0	0	0	0
2	2	19	""	"iYPR071W"	6820	17900	130	2676	2786	1217	79	96	98	99	95	0	4405	4303	1794	271	298	135	98	96	0	0	0	0	0	0	0	0	0	0	0	0	0	0	0	0	0	0	0	0.628	0.671	0.671	0.681	1.626	0.648	0.869	0.000	0.000	0.000	0.000	0.000	0.000	0.000	0.000	0.000	0.000	0.000	0.000	0.000	0.000	120	554	6731	6739	-0.671	Error	Error	2597	4134	0	0	2707	4032	0	0	0	0
2	3	19	""	"iYPR074C"	7030	17910	130	2327	2183	885	80	94	81	97	96	0	1981	1900	800	264	285	132	94	90	0	0	0	0	0	0	0	0	0	0	0	0	0	0	0	0	0	0	0	1.309	1.285	1.302	1.259	2.043	1.244	0.793	0.000	0.000	0.000	0.000	0.000	0.000	0.000	0.000	0.000	0.000	0.000	0.000	0.000	0.000	120	479	3964	3739	0.388	Error	Error	2247	1717	0	0	2103	1636	0	0	0	0
2	4	19	""	"iYPR094W"	7190	17900	130	441	413	232	77	89	71	80	76	0	850	802	445	259	283	141	77	75	0	0	0	0	0	0	0	0	0	0	0	0	0	0	0	0	0	0	0	0.616	0.619	0.534	0.464	2.157	0.520	0.743	0.000	0.000	0.000	0.000	0.000	0.000	0.000	0.000	0.000	0.000	0.000	0.000	0.000	0.000	120	488	955	879	-0.699	Error	Error	364	591	0	0	336	543	0	0	0	0
2	5	19	""	"iYPR098C"	7400	17910	130	1487	1375	520	74	87	69	97	95	0	2361	2200	881	251	279	144	95	95	0	0	0	0	0	0	0	0	0	0	0	0	0	0	0	0	0	0	0	0.670	0.668	0.641	0.677	1.673	0.608	0.818	0.000	0.000	0.000	0.000	0.000	0.000	0.000	0.000	0.000	0.000	0.000	0.000	0.000	0.000	120	534	3523	3250	-0.578	Error	Error	1413	2110	0	0	1301	1949	0	0	0	0
2	6	19	""	"iYPR103W"	7590	17910	130	1174	1169	510	67	74	41	96	96	0	4391	4020	1741	239	259	122	95	95	0	0	0	0	0	0	0	0	0	0	0	0	0	0	0	0	0	0	0	0.267	0.291	0.293	0.299	1.705	0.269	0.846	0.000	0.000	0.000	0.000	0.000	0.000	0.000	0.000	0.000	0.000	0.000	0.000	0.000	0.000	120	477	5259	4883	-1.907	Error	Error	1107	4152	0	0	1102	3781	0	0	0	0
2	7	19	""	"iYPRWsigma2-0"	7770	17900	130	2640	2510	935	68	86	112	97	96	0	4596	4321	1910	238	277	229	96	94	0	0	0	0	0	0	0	0	0	0	0	0	0	0	0	0	0	0	0	0.590	0.598	0.601	0.625	1.591	0.263	0.450	0.000	0.000	0.000	0.000	0.000	0.000	0.000	0.000	0.000	0.000	0.000	0.000	0.000	0.000	120	473	6930	6525	-0.761	Error	Error	2572	4358	0	0	2442	4083	0	0	0	0
2	8	19	""	"itC(GCA)P2"	7960	17910	120	918	875	345	74	92	111	96	92	0	1424	1370	526	255	277	212	91	88	0	0	0	0	0	0	0	0	0	0	0	0	0	0	0	0	0	0	0	0.722	0.718	0.699	0.715	1.877	0.670	0.827	0.000	0.000	0.000	0.000	0.000	0.000	0.000	0.000	0.000	0.000	0.000	0.000	0.000	0.000	120	484	2013	1916	-0.470	Error	Error	844	1169	0	0	801	1115	0	0	0	0
2	9	19	""	"iYPR121W-0"	8170	17910	130	1922	2002	1066	76	82	35	98	96	0	3372	3297	1759	254	266	112	92	91	0	0	0	0	0	0	0	0	0	0	0	0	0	0	0	0	0	0	0	0.592	0.633	0.587	0.690	2.260	0.592	0.828	0.000	0.000	0.000	0.000	0.000	0.000	0.000	0.000	0.000	0.000	0.000	0.000	0.000	0.000	120	494	4964	4969	-0.756	Error	Error	1846	3118	0	0	1926	3043	0	0	0	0
2	10	19	""	"itN(GUU)P"	8340	17910	120	438	466	227	73	79	34	95	90	0	841	916	409	251	264	89	89	89	0	0	0	0	0	0	0	0	0	0	0	0	0	0	0	0	0	0	0	0.619	0.591	0.559	0.571	1.838	0.530	0.773	0.000	0.000	0.000	0.000	0.000	0.000	0.000	0.000	0.000	0.000	0.000	0.000	0.000	0.000	120	452	955	1058	-0.693	Error	Error	365	590	0	0	393	665	0	0	0	0
2	11	19	""	"iYPR141C"	8540	17910	130	505	524	241	73	79	35	95	93	0	806	758	317	255	267	82	85	85	0	0	0	0	0	0	0	0	0	0	0	0	0	0	0	0	0	0	0	0.784	0.897	0.841	0.841	2.217	0.780	0.694	0.000	0.000	0.000	0.000	0.000	0.000	0.000	0.000	0.000	0.000	0.000	0.000	0.000	0.000	120	507	983	954	-0.351	Error	Error	432	551	0	0	451	503	0	0	0	0
2	12	19	""	"iSNR45"	8730	17910	120	2105	1978	910	77	84	45	98	95	0	2100	2057	928	269	271	82	92	90	0	0	0	0	0	0	0	0	0	0	0	0	0	0	0	0	0	0	0	1.108	1.063	1.078	1.071	1.701	1.047	0.847	0.000	0.000	0.000	0.000	0.000	0.000	0.000	0.000	0.000	0.000	0.000	0.000	0.000	0.000	120	461	3859	3689	0.147	Error	Error	2028	1831	0	0	1901	1788	0	0	0	0
2	13	19	""	"iYAL064C-A-3"	8920	17910	130	7295	7587	3966	84	100	89	98	98	0	10017	9705	4980	274	290	126	100	98	0	0	0	0	0	0	0	0	0	0	0	0	0	0	0	0	0	0	0	0.740	0.796	0.800	0.814	1.580	0.781	0.906	0.000	0.000	0.000	0.000	0.000	0.000	0.000	0.000	0.000	0.000	0.000	0.000	0.000	0.000	120	533	16954	16934	-0.434	Error	Error	7211	9743	0	0	7503	9431	0	0	0	0
2	14	19	""	"iYBLWdelta3"	9100	17910	100	506	492	241	87	106	99	85	80	0	1201	1104	470	282	314	161	86	82	0	0	0	0	0	0	0	0	0	0	0	0	0	0	0	0	0	0	0	0.456	0.493	0.477	0.463	1.655	0.436	0.719	0.000	0.000	0.000	0.000	0.000	0.000	0.000	0.000	0.000	0.000	0.000	0.000	0.000	0.000	80	388	1338	1227	-1.133	Error	Error	419	919	0	0	405	822	0	0	0	0
2	15	19	""	"YBLCdelta7"	9290	17910	120	524	559	267	83	90	39	97	95	0	1362	1415	713	272	294	124	90	88	0	0	0	0	0	0	0	0	0	0	0	0	0	0	0	0	0	0	0	0.405	0.416	0.384	0.414	1.721	0.366	0.823	0.000	0.000	0.000	0.000	0.000	0.000	0.000	0.000	0.000	0.000	0.000	0.000	0.000	0.000	120	536	1531	1619	-1.305	Error	Error	441	1090	0	0	476	1143	0	0	0	0
2	16	19	""	"itE(UUC)C"	9490	17920	110	464	433	164	85	94	49	91	90	0	912	896	368	270	291	122	91	88	0	0	0	0	0	0	0	0	0	0	0	0	0	0	0	0	0	0	0	0.590	0.556	0.601	0.514	1.822	0.456	0.722	0.000	0.000	0.000	0.000	0.000	0.000	0.000	0.000	0.000	0.000	0.000	0.000	0.000	0.000	80	421	1021	974	-0.760	Error	Error	379	642	0	0	348	626	0	0	0	0
2	17	19	""	"itL(CAA)C"	9680	17900	160	1168	1101	668	88	102	81	93	87	0	2093	2039	1269	264	296	189	90	82	0	0	0	0	0	0	0	0	0	0	0	0	0	0	0	0	0	0	0	0.590	0.571	0.554	0.604	1.860	0.525	0.830	0.000	0.000	0.000	0.000	0.000	0.000	0.000	0.000	0.000	0.000	0.000	0.000	0.000	0.000	208	562	2909	2788	-0.760	Error	Error	1080	1829	0	0	1013	1775	0	0	-100	0
2	18	19	""	"iYCL014W"	9870	17920	110	538	502	192	90	97	45	90	88	0	1397	1332	553	274	302	153	87	87	0	0	0	0	0	0	0	0	0	0	0	0	0	0	0	0	0	0	0	0.399	0.389	0.374	0.374	1.748	0.341	0.826	0.000	0.000	0.000	0.000	0.000	0.000	0.000	0.000	0.000	0.000	0.000	0.000	0.000	0.000	80	408	1571	1470	-1.326	Error	Error	448	1123	0	0	412	1058	0	0	0	0
2	19	19	""	"iYCR002C"	10060	17910	120	831	814	298	88	96	47	95	95	0	1489	1408	525	273	306	152	94	91	0	0	0	0	0	0	0	0	0	0	0	0	0	0	0	0	0	0	0	0.611	0.640	0.638	0.627	1.601	0.585	0.843	0.000	0.000	0.000	0.000	0.000	0.000	0.000	0.000	0.000	0.000	0.000	0.000	0.000	0.000	120	483	1959	1861	-0.711	Error	Error	743	1216	0	0	726	1135	0	0	0	0
2	20	19	""	"iYCR006C"	10240	17910	120	1101	1062	449	95	105	65	96	95	0	1143	1163	492	275	297	119	94	89	0	0	0	0	0	0	0	0	0	0	0	0	0	0	0	0	0	0	0	1.159	1.089	1.098	1.108	1.714	1.022	0.830	0.000	0.000	0.000	0.000	0.000	0.000	0.000	0.000	0.000	0.000	0.000	0.000	0.000	0.000	120	480	1874	1855	0.213	Error	Error	1006	868	0	0	967	888	0	0	0	0
2	21	19	""	"iYCRCdelta6-A"	10440	17910	120	1632	1729	797	100	114	76	98	96	0	2025	2109	910	285	306	120	96	95	0	0	0	0	0	0	0	0	0	0	0	0	0	0	0	0	0	0	0	0.880	0.893	0.909	0.899	1.413	0.863	0.861	0.000	0.000	0.000	0.000	0.000	0.000	0.000	0.000	0.000	0.000	0.000	0.000	0.000	0.000	120	548	3272	3453	-0.184	Error	Error	1532	1740	0	0	1629	1824	0	0	0	0
2	22	19	""	"YCRCtau1"	10650	17910	90	166	192	131	100	113	67	50	26	0	533	585	270	287	302	108	84	63	0	0	0	0	0	0	0	0	0	0	0	0	0	0	0	0	0	0	0	0.268	0.309	0.333	0.299	2.112	0.292	0.487	0.000	0.000	0.000	0.000	0.000	0.000	0.000	0.000	0.000	0.000	0.000	0.000	0.000	0.000	52	366	312	390	-1.898	Error	Error	66	246	0	0	92	298	0	0	0	0
2	1	20	""	"SNR189"	6620	18100	110	460	488	309	92	101	57	80	73	0	676	731	393	291	308	116	80	73	0	0	0	0	0	0	0	0	0	0	0	0	0	0	0	0	0	0	0	0.956	0.900	0.934	0.775	2.355	0.770	0.692	0.000	0.000	0.000	0.000	0.000	0.000	0.000	0.000	0.000	0.000	0.000	0.000	0.000	0.000	80	597	753	836	-0.065	Error	Error	368	385	0	0	396	440	0	0	0	0
2	2	20	""	"YCRWomega3"	6830	18100	120	1410	1358	669	81	92	56	96	92	0	2553	2394	1083	284	301	115	91	90	0	0	0	0	0	0	0	0	0	0	0	0	0	0	0	0	0	0	0	0.586	0.605	0.610	0.542	2.017	0.392	0.525	0.000	0.000	0.000	0.000	0.000	0.000	0.000	0.000	0.000	0.000	0.000	0.000	0.000	0.000	120	588	3598	3387	-0.772	Error	Error	1329	2269	0	0	1277	2110	0	0	0	0
2	3	20	"EMPTY"	"EMPTY"	7000	18090	150	78	82	33	84	96	71	2	0	0	267	275	83	279	296	120	3	1	0	0	0	0	0	0	0	0	0	0	0	0	0	0	0	0	0	0	0	0.500	0.500	0.572	0.643	3.735	0.115	0.074	0.000	0.000	0.000	0.000	0.000	0.000	0.000	0.000	0.000	0.000	0.000	0.000	0.000	0.000	156	705	-18	-6	-1.000	Error	Error	-6	-12	0	0	-2	-4	0	0	-75	0
2	4	20	"EMPTY"	"EMPTY"	7190	18090	150	76	82	46	84	94	57	3	1	0	260	271	85	269	285	115	8	1	0	0	0	0	0	0	0	0	0	0	0	0	0	0	0	0	0	0	0	0.889	-1.000	0.301	0.305	3.464	0.149	0.064	0.000	0.000	0.000	0.000	0.000	0.000	0.000	0.000	0.000	0.000	0.000	0.000	0.000	0.000	156	700	-17	0	-0.170	Error	Error	-8	-9	0	0	-2	2	0	0	-75	0
2	5	20	"EMPTY"	"EMPTY"	7380	18090	150	87	89	34	79	88	50	9	1	0	263	274	90	258	277	118	12	1	0	0	0	0	0	0	0	0	0	0	0	0	0	0	0	0	0	0	0	1.600	0.625	0.366	0.391	4.679	0.061	0.018	0.000	0.000	0.000	0.000	0.000	0.000	0.000	0.000	0.000	0.000	0.000	0.000	0.000	0.000	156	723	13	26	0.678	Error	Error	8	5	0	0	10	16	0	0	-75	0
2	6	20	"EMPTY"	"EMPTY"	7570	18090	150	59	61	22	71	77	36	3	0	0	215	226	70	241	260	110	3	1	0	0	0	0	0	0	0	0	0	0	0	0	0	0	0	0	0	0	0	0.462	0.667	0.417	0.414	2.899	0.064	0.028	0.000	0.000	0.000	0.000	0.000	0.000	0.000	0.000	0.000	0.000	0.000	0.000	0.000	0.000	156	695	-38	-25	-1.115	Error	Error	-12	-26	0	0	-10	-15	0	0	-75	0
2	7	20	"EMPTY"	"EMPTY"	7760	18090	150	60	62	19	66	79	92	0	0	0	220	227	66	234	258	177	0	0	0	0	0	0	0	0	0	0	0	0	0	0	0	0	0	0	0	0	0	0.429	0.571	0.313	0.307	3.773	0.491	0.675	0.000	0.000	0.000	0.000	0.000	0.000	0.000	0.000	0.000	0.000	0.000	0.000	0.000	0.000	156	703	-20	-11	-1.222	Error	Error	-6	-14	0	0	-4	-7	0	0	-75	0
2	8	20	"EMPTY"	"EMPTY"	7950	18090	150	61	67	38	71	83	91	0	0	0	234	241	131	244	262	166	1	0	0	0	0	0	0	0	0	0	0	0	0	0	0	0	0	0	0	0	0	1.000	1.333	0.352	0.433	4.846	0.119	0.131	0.000	0.000	0.000	0.000	0.000	0.000	0.000	0.000	0.000	0.000	0.000	0.000	0.000	0.000	156	721	-20	-7	0.000	Error	Error	-10	-10	0	0	-4	-3	0	0	-75	0
2	9	20	"EMPTY"	"EMPTY"	8140	18090	150	72	72	24	76	80	31	5	0	0	238	243	69	254	260	82	9	1	0	0	0	0	0	0	0	0	0	0	0	0	0	0	0	0	0	0	0	0.250	0.364	0.389	0.381	4.347	0.018	0.002	0.000	0.000	0.000	0.000	0.000	0.000	0.000	0.000	0.000	0.000	0.000	0.000	0.000	0.000	156	701	-20	-15	-2.000	Error	Error	-4	-16	0	0	-4	-11	0	0	-75	0
2	10	20	"EMPTY"	"EMPTY"	8330	18090	150	77	80	29	80	85	33	12	1	0	256	267	83	258	271	84	14	3	0	0	0	0	0	0	0	0	0	0	0	0	0	0	0	0	0	0	0	1.500	0.000	0.290	0.366	4.204	0.048	0.012	0.000	0.000	0.000	0.000	0.000	0.000	0.000	0.000	0.000	0.000	0.000	0.000	0.000	0.000	156	685	-5	9	0.585	Error	Error	-3	-2	0	0	0	9	0	0	-75	0
2	11	20	"EMPTY"	"EMPTY"	8520	18090	150	80	81	27	83	89	37	8	1	0	256	264	74	259	271	87	13	2	0	0	0	0	0	0	0	0	0	0	0	0	0	0	0	0	0	0	0	1.000	-0.400	0.310	0.346	4.459	0.093	0.039	0.000	0.000	0.000	0.000	0.000	0.000	0.000	0.000	0.000	0.000	0.000	0.000	0.000	0.000	156	724	-6	3	0.000	Error	Error	-3	-3	0	0	-2	5	0	0	-75	0
2	12	20	"EMPTY"	"EMPTY"	8720	18090	150	78	82	30	86	93	42	8	1	0	265	269	80	267	275	84	13	3	0	0	0	0	0	0	0	0	0	0	0	0	0	0	0	0	0	0	0	4.000	-2.000	0.382	0.411	4.767	0.036	0.007	0.000	0.000	0.000	0.000	0.000	0.000	0.000	0.000	0.000	0.000	0.000	0.000	0.000	0.000	156	715	-10	-2	2.000	Error	Error	-8	-2	0	0	-4	2	0	0	-75	0
2	13	20	"EMPTY"	"EMPTY"	8910	18100	150	87	90	33	88	100	73	2	0	0	273	275	73	283	296	115	5	0	0	0	0	0	0	0	0	0	0	0	0	0	0	0	0	0	0	0	0	0.100	-0.250	0.463	0.469	4.840	0.066	0.035	0.000	0.000	0.000	0.000	0.000	0.000	0.000	0.000	0.000	0.000	0.000	0.000	0.000	0.000	156	734	-11	-6	-3.322	Error	Error	-1	-10	0	0	2	-8	0	0	-75	0
2	14	20	"EMPTY"	"EMPTY"	9100	18100	150	89	90	29	93	104	72	0	0	0	274	283	86	289	307	132	7	0	0	0	0	0	0	0	0	0	0	0	0	0	0	0	0	0	0	0	0	0.267	0.500	0.296	0.327	4.028	0.051	0.017	0.000	0.000	0.000	0.000	0.000	0.000	0.000	0.000	0.000	0.000	0.000	0.000	0.000	0.000	156	750	-19	-9	-1.907	Error	Error	-4	-15	0	0	-3	-6	0	0	-75	0
2	15	20	"EMPTY"	"EMPTY"	9290	18100	150	84	90	32	89	94	36	13	2	0	273	353	902	281	295	106	9	1	0	0	0	0	0	0	0	0	0	0	0	0	0	0	0	0	0	0	0	0.625	0.014	0.363	0.417	3.690	0.001	0.000	0.000	0.000	0.000	0.000	0.000	0.000	0.000	0.000	0.000	0.000	0.000	0.000	0.000	0.000	156	754	-13	73	-0.678	Error	Error	-5	-8	0	0	1	72	0	0	-75	0
2	16	20	"EMPTY"	"EMPTY"	9480	18100	150	84	90	30	90	95	42	10	1	0	254	266	81	274	287	104	7	1	0	0	0	0	0	0	0	0	0	0	0	0	0	0	0	0	0	0	0	0.300	0.000	0.302	0.357	3.433	0.067	0.020	0.000	0.000	0.000	0.000	0.000	0.000	0.000	0.000	0.000	0.000	0.000	0.000	0.000	0.000	156	736	-26	-8	-1.737	Error	Error	-6	-20	0	0	0	-8	0	0	-75	0
2	17	20	"EMPTY"	"EMPTY"	9670	18100	150	99	100	32	94	99	43	11	1	0	277	283	81	279	288	96	12	2	0	0	0	0	0	0	0	0	0	0	0	0	0	0	0	0	0	0	0	-2.500	1.500	0.364	0.387	3.580	0.071	0.015	0.000	0.000	0.000	0.000	0.000	0.000	0.000	0.000	0.000	0.000	0.000	0.000	0.000	0.000	156	702	3	10	Error	Error	Error	5	-2	0	0	6	4	0	0	-75	0
2	18	20	"EMPTY"	"EMPTY"	9860	18100	150	100	105	38	99	104	43	13	1	0	280	290	82	289	301	108	10	0	0	0	0	0	0	0	0	0	0	0	0	0	0	0	0	0	0	0	0	-0.111	6.000	0.448	0.426	3.886	0.060	0.015	0.000	0.000	0.000	0.000	0.000	0.000	0.000	0.000	0.000	0.000	0.000	0.000	0.000	0.000	156	724	-8	7	Error	Error	Error	1	-9	0	0	6	1	0	0	-75	0
2	19	20	"EMPTY"	"EMPTY"	10050	18100	150	104	108	41	104	112	50	10	2	0	290	293	75	296	310	116	7	0	0	0	0	0	0	0	0	0	0	0	0	0	0	0	0	0	0	0	0	0.000	-1.333	0.564	0.570	3.343	0.074	0.011	0.000	0.000	0.000	0.000	0.000	0.000	0.000	0.000	0.000	0.000	0.000	0.000	0.000	0.000	156	727	-6	1	Error	Error	Error	0	-6	0	0	4	-3	0	0	-75	0
2	20	20	"EMPTY"	"EMPTY"	10240	18100	150	111	119	46	114	121	58	12	2	0	297	305	92	306	318	112	7	3	0	0	0	0	0	0	0	0	0	0	0	0	0	0	0	0	0	0	0	0.333	-5.000	0.667	0.790	4.843	0.013	0.002	0.000	0.000	0.000	0.000	0.000	0.000	0.000	0.000	0.000	0.000	0.000	0.000	0.000	0.000	156	728	-12	4	-1.585	Error	Error	-3	-9	0	0	5	-1	0	0	-75	0
2	21	20	"EMPTY"	"EMPTY"	10430	18100	150	114	121	43	123	129	57	12	0	0	307	323	109	314	325	103	15	5	0	0	0	0	0	0	0	0	0	0	0	0	0	0	0	0	0	0	0	1.286	-0.222	0.510	0.483	3.131	0.105	0.038	0.000	0.000	0.000	0.000	0.000	0.000	0.000	0.000	0.000	0.000	0.000	0.000	0.000	0.000	156	756	-16	7	0.363	Error	Error	-9	-7	0	0	-2	9	0	0	-75	0
2	22	20	"EMPTY"	"EMPTY"	10620	18100	150	129	132	46	123	130	55	16	3	0	299	314	103	307	321	103	13	4	0	0	0	0	0	0	0	0	0	0	0	0	0	0	0	0	0	0	0	-0.750	1.286	0.457	0.464	4.077	0.138	0.057	0.000	0.000	0.000	0.000	0.000	0.000	0.000	0.000	0.000	0.000	0.000	0.000	0.000	0.000	156	974	-2	16	Error	Error	Error	6	-8	0	0	9	7	0	0	-75	0
3	1	1	""	"YBL083C"	11080	14440	120	1878	1728	808	73	75	29	100	95	0	1395	1297	626	248	251	70	86	86	0	0	0	0	0	0	0	0	0	0	0	0	0	0	0	0	0	0	0	1.574	1.578	1.588	1.588	1.882	1.520	0.775	0.000	0.000	0.000	0.000	0.000	0.000	0.000	0.000	0.000	0.000	0.000	0.000	0.000	0.000	120	592	2952	2704	0.654	Error	Error	1805	1147	0	0	1655	1049	0	0	0	0
3	2	1	""	"YBL112C"	11250	14440	120	10492	10105	6003	78	86	79	100	100	0	7317	7077	4082	253	262	99	99	99	0	0	0	0	0	0	0	0	0	0	0	0	0	0	0	0	0	0	0	1.474	1.469	1.552	1.499	1.949	1.460	0.873	0.000	0.000	0.000	0.000	0.000	0.000	0.000	0.000	0.000	0.000	0.000	0.000	0.000	0.000	120	552	17478	16851	0.560	Error	Error	10414	7064	0	0	10027	6824	0	0	0	0
3	3	1	"CDS1"	"YBR029C"	11450	14440	120	594	605	369	82	94	76	85	81	0	719	724	370	252	273	111	83	80	0	0	0	0	0	0	0	0	0	0	0	0	0	0	0	0	0	0	0	1.096	1.108	1.102	0.895	2.348	1.023	0.639	0.000	0.000	0.000	0.000	0.000	0.000	0.000	0.000	0.000	0.000	0.000	0.000	0.000	0.000	120	658	979	995	0.133	Error	Error	512	467	0	0	523	472	0	0	0	0
3	4	1	"BOI1"	"YBL085W"	11680	14430	80	138	143	58	88	96	47	51	26	0	445	427	186	269	283	101	63	44	0	0	0	0	0	0	0	0	0	0	0	0	0	0	0	0	0	0	0	0.284	0.348	0.328	0.299	4.616	0.167	0.198	0.000	0.000	0.000	0.000	0.000	0.000	0.000	0.000	0.000	0.000	0.000	0.000	0.000	0.000	52	259	226	213	-1.816	Error	Error	50	176	0	0	55	158	0	0	0	0
3	5	1	"NTH2"	"YBR001C"	11820	14440	120	2010	1919	1049	73	78	33	95	94	0	4068	3822	2110	257	263	82	91	89	0	0	0	0	0	0	0	0	0	0	0	0	0	0	0	0	0	0	0	0.508	0.518	0.518	0.504	1.988	0.482	0.821	0.000	0.000	0.000	0.000	0.000	0.000	0.000	0.000	0.000	0.000	0.000	0.000	0.000	0.000	120	574	5748	5411	-0.976	Error	Error	1937	3811	0	0	1846	3565	0	0	0	0
3	6	1	"RPL4A"	"YBR031W"	12020	14440	120	1290	1252	637	69	74	32	95	92	0	2282	2230	1301	246	259	80	88	86	0	0	0	0	0	0	0	0	0	0	0	0	0	0	0	0	0	0	0	0.600	0.596	0.574	0.632	1.992	0.535	0.793	0.000	0.000	0.000	0.000	0.000	0.000	0.000	0.000	0.000	0.000	0.000	0.000	0.000	0.000	120	598	3257	3167	-0.738	Error	Error	1221	2036	0	0	1183	1984	0	0	0	0
3	7	1	"RPL23A"	"YBL087C"	12210	14440	120	1791	1711	914	70	75	36	96	95	0	2479	2453	1233	248	255	80	89	89	0	0	0	0	0	0	0	0	0	0	0	0	0	0	0	0	0	0	0	0.771	0.744	0.752	0.744	1.879	0.723	0.805	0.000	0.000	0.000	0.000	0.000	0.000	0.000	0.000	0.000	0.000	0.000	0.000	0.000	0.000	120	584	3952	3846	-0.374	Error	Error	1721	2231	0	0	1641	2205	0	0	0	0
3	8	1	"COQ1"	"YBR003W"	12400	14440	120	3643	3115	1401	75	80	34	100	98	0	5901	5214	2280	259	267	81	99	96	0	0	0	0	0	0	0	0	0	0	0	0	0	0	0	0	0	0	0	0.632	0.614	0.616	0.608	1.895	0.594	0.834	0.000	0.000	0.000	0.000	0.000	0.000	0.000	0.000	0.000	0.000	0.000	0.000	0.000	0.000	120	568	9210	7995	-0.661	Error	Error	3568	5642	0	0	3040	4955	0	0	0	0
3	9	1	""	"YBR033W"	12580	14440	120	1955	1915	992	80	85	41	99	96	0	3881	4010	2404	269	289	190	92	90	0	0	0	0	0	0	0	0	0	0	0	0	0	0	0	0	0	0	0	0.519	0.491	0.502	0.523	2.064	0.424	0.798	0.000	0.000	0.000	0.000	0.000	0.000	0.000	0.000	0.000	0.000	0.000	0.000	0.000	0.000	120	565	5487	5576	-0.946	Error	Error	1875	3612	0	0	1835	3741	0	0	0	0
3	10	1	""	"YBL089W"	12770	14440	120	1773	1598	814	85	109	200	85	83	0	4706	4125	2096	281	373	651	82	80	0	0	0	0	0	0	0	0	0	0	0	0	0	0	0	0	0	0	0	0.381	0.394	0.404	0.448	2.419	0.370	0.829	0.000	0.000	0.000	0.000	0.000	0.000	0.000	0.000	0.000	0.000	0.000	0.000	0.000	0.000	120	554	6113	5357	-1.390	Error	Error	1688	4425	0	0	1513	3844	0	0	0	0
3	11	1	""	"YBR005W"	12950	14440	120	1101	1015	518	82	105	195	84	78	0	1770	1600	809	267	357	624	80	66	0	0	0	0	0	0	0	0	0	0	0	0	0	0	0	0	0	0	0	0.678	0.700	0.678	0.642	2.224	0.506	0.687	0.000	0.000	0.000	0.000	0.000	0.000	0.000	0.000	0.000	0.000	0.000	0.000	0.000	0.000	120	584	2522	2266	-0.561	Error	Error	1019	1503	0	0	933	1333	0	0	0	0
3	12	1	"PDX3"	"YBR035C"	13150	14440	120	1249	1246	615	80	84	41	93	92	0	1338	1300	612	265	281	143	88	85	0	0	0	0	0	0	0	0	0	0	0	0	0	0	0	0	0	0	0	1.089	1.127	1.123	1.106	1.766	1.070	0.809	0.000	0.000	0.000	0.000	0.000	0.000	0.000	0.000	0.000	0.000	0.000	0.000	0.000	0.000	120	598	2242	2201	0.124	Error	Error	1169	1073	0	0	1166	1035	0	0	0	0
3	13	1	""	"YCL047C"	13340	14430	120	1858	1619	786	76	79	30	97	94	0	4988	4623	2186	255	264	77	93	90	0	0	0	0	0	0	0	0	0	0	0	0	0	0	0	0	0	0	0	0.377	0.353	0.349	0.366	1.921	0.337	0.864	0.000	0.000	0.000	0.000	0.000	0.000	0.000	0.000	0.000	0.000	0.000	0.000	0.000	0.000	120	585	6515	5911	-1.409	Error	Error	1782	4733	0	0	1543	4368	0	0	0	0
3	14	1	"RVS161"	"YCR009C"	13530	14430	120	1502	1294	588	71	73	25	96	95	0	4530	4160	1959	249	256	71	91	90	0	0	0	0	0	0	0	0	0	0	0	0	0	0	0	0	0	0	0	0.334	0.313	0.327	0.344	2.274	0.283	0.818	0.000	0.000	0.000	0.000	0.000	0.000	0.000	0.000	0.000	0.000	0.000	0.000	0.000	0.000	120	600	5712	5134	-1.581	Error	Error	1431	4281	0	0	1223	3911	0	0	0	0
3	15	1	"PHO87"	"YCR037C"	13730	14440	120	1303	1290	699	71	76	35	97	92	0	2793	2741	1599	248	259	83	86	85	0	0	0	0	0	0	0	0	0	0	0	0	0	0	0	0	0	0	0	0.484	0.489	0.504	0.519	2.058	0.432	0.795	0.000	0.000	0.000	0.000	0.000	0.000	0.000	0.000	0.000	0.000	0.000	0.000	0.000	0.000	120	585	3777	3712	-1.047	Error	Error	1232	2545	0	0	1219	2493	0	0	0	0
3	16	1	""	"YCL049C"	13920	14440	120	1169	1088	427	74	77	34	98	95	0	1621	1518	663	255	279	337	85	85	0	0	0	0	0	0	0	0	0	0	0	0	0	0	0	0	0	0	0	0.802	0.803	0.799	0.785	1.677	0.716	0.785	0.000	0.000	0.000	0.000	0.000	0.000	0.000	0.000	0.000	0.000	0.000	0.000	0.000	0.000	120	570	2461	2277	-0.319	Error	Error	1095	1366	0	0	1014	1263	0	0	0	0
3	17	1	"adp1"	"YCR011C"	14110	14440	120	1494	1449	625	76	79	30	100	97	0	1834	1852	951	261	284	345	89	82	0	0	0	0	0	0	0	0	0	0	0	0	0	0	0	0	0	0	0	0.901	0.863	0.904	0.965	2.161	0.754	0.735	0.000	0.000	0.000	0.000	0.000	0.000	0.000	0.000	0.000	0.000	0.000	0.000	0.000	0.000	120	538	2991	2964	-0.150	Error	Error	1418	1573	0	0	1373	1591	0	0	0	0
3	18	1	"MATAlpha2"	"YCR039C"	14280	14440	120	3503	3476	1740	80	82	30	100	99	0	4591	4324	1764	265	270	77	100	100	0	0	0	0	0	0	0	0	0	0	0	0	0	0	0	0	0	0	0	0.791	0.837	0.810	0.787	1.681	0.847	0.860	0.000	0.000	0.000	0.000	0.000	0.000	0.000	0.000	0.000	0.000	0.000	0.000	0.000	0.000	120	563	7749	7455	-0.338	Error	Error	3423	4326	0	0	3396	4059	0	0	0	0
3	19	1	"LRE1"	"YCL051W"	14490	14450	130	1864	1773	820	82	84	31	97	95	0	5716	5192	2380	264	274	80	95	94	0	0	0	0	0	0	0	0	0	0	0	0	0	0	0	0	0	0	0	0.327	0.343	0.358	0.380	2.414	0.328	0.884	0.000	0.000	0.000	0.000	0.000	0.000	0.000	0.000	0.000	0.000	0.000	0.000	0.000	0.000	120	639	7234	6619	-1.613	Error	Error	1782	5452	0	0	1691	4928	0	0	0	0
3	20	1	""	"YCR013C"	14670	14440	120	884	791	364	79	82	28	91	89	0	1743	1638	804	259	263	70	88	85	0	0	0	0	0	0	0	0	0	0	0	0	0	0	0	0	0	0	0	0.542	0.516	0.509	0.485	2.170	0.452	0.801	0.000	0.000	0.000	0.000	0.000	0.000	0.000	0.000	0.000	0.000	0.000	0.000	0.000	0.000	120	552	2289	2091	-0.882	Error	Error	805	1484	0	0	712	1379	0	0	0	0
3	21	1	""	"YCR041W"	14860	14450	120	3961	3702	2021	77	80	30	100	97	0	5898	5371	2936	257	267	80	98	96	0	0	0	0	0	0	0	0	0	0	0	0	0	0	0	0	0	0	0	0.689	0.709	0.701	0.733	2.117	0.684	0.922	0.000	0.000	0.000	0.000	0.000	0.000	0.000	0.000	0.000	0.000	0.000	0.000	0.000	0.000	120	575	9525	8739	-0.538	Error	Error	3884	5641	0	0	3625	5114	0	0	0	0
3	22	1	"SPB1"	"YCL054W"	15050	14450	120	1386	1465	826	76	79	30	98	96	0	3819	4085	2182	254	263	79	95	92	0	0	0	0	0	0	0	0	0	0	0	0	0	0	0	0	0	0	0	0.367	0.363	0.348	0.379	1.768	0.348	0.854	0.000	0.000	0.000	0.000	0.000	0.000	0.000	0.000	0.000	0.000	0.000	0.000	0.000	0.000	120	641	4875	5220	-1.444	Error	Error	1310	3565	0	0	1389	3831	0	0	0	0
3	1	2	""	"YCR015C"	11060	14630	130	2311	2184	968	73	75	30	100	98	0	2898	2627	1275	253	288	751	83	76	0	0	0	0	0	0	0	0	0	0	0	0	0	0	0	0	0	0	0	0.846	0.889	0.873	0.989	2.279	0.814	0.785	0.000	0.000	0.000	0.000	0.000	0.000	0.000	0.000	0.000	0.000	0.000	0.000	0.000	0.000	120	599	4883	4485	-0.241	Error	Error	2238	2645	0	0	2111	2374	0	0	0	0
3	2	2	""	"YCR043C"	11250	14630	130	1111	1000	444	75	81	75	90	86	0	1397	1327	594	249	258	91	88	86	0	0	0	0	0	0	0	0	0	0	0	0	0	0	0	0	0	0	0	0.902	0.858	0.842	0.780	1.962	0.823	0.793	0.000	0.000	0.000	0.000	0.000	0.000	0.000	0.000	0.000	0.000	0.000	0.000	0.000	0.000	120	550	2184	2003	-0.148	Error	Error	1036	1148	0	0	925	1078	0	0	0	0
3	3	2	""	"YDR003W"	11440	14630	130	1309	1152	539	75	81	72	89	86	0	1507	1358	662	245	260	94	85	83	0	0	0	0	0	0	0	0	0	0	0	0	0	0	0	0	0	0	0	0.978	0.968	0.951	0.867	2.141	0.917	0.734	0.000	0.000	0.000	0.000	0.000	0.000	0.000	0.000	0.000	0.000	0.000	0.000	0.000	0.000	120	561	2496	2190	-0.032	Error	Error	1234	1262	0	0	1077	1113	0	0	0	0
3	4	2	""	"YDR034C-A"	11630	14640	130	6189	5181	2427	81	85	34	99	99	0	8984	7728	3682	261	270	85	99	99	0	0	0	0	0	0	0	0	0	0	0	0	0	0	0	0	0	0	0	0.700	0.683	0.662	0.679	2.245	0.643	0.841	0.000	0.000	0.000	0.000	0.000	0.000	0.000	0.000	0.000	0.000	0.000	0.000	0.000	0.000	120	608	14831	12567	-0.514	Error	Error	6108	8723	0	0	5100	7467	0	0	0	0
3	5	2	""	"YDR063W"	11830	14640	120	275	265	98	81	85	34	92	85	0	605	590	254	266	275	85	81	75	0	0	0	0	0	0	0	0	0	0	0	0	0	0	0	0	0	0	0	0.572	0.568	0.521	0.515	2.348	0.369	0.508	0.000	0.000	0.000	0.000	0.000	0.000	0.000	0.000	0.000	0.000	0.000	0.000	0.000	0.000	120	535	533	508	-0.805	Error	Error	194	339	0	0	184	324	0	0	0	0
3	6	2	"MAF1"	"YDR005C"	12020	14640	120	1089	1074	526	70	76	30	95	92	0	3282	3102	1685	250	261	87	87	85	0	0	0	0	0	0	0	0	0	0	0	0	0	0	0	0	0	0	0	0.336	0.352	0.347	0.376	2.237	0.306	0.817	0.000	0.000	0.000	0.000	0.000	0.000	0.000	0.000	0.000	0.000	0.000	0.000	0.000	0.000	120	516	4051	3856	-1.573	Error	Error	1019	3032	0	0	1004	2852	0	0	0	0
3	7	2	""	"YDR034C-D"	12210	14640	120	7809	7416	3590	74	80	34	100	100	0	11172	10439	5112	256	271	99	100	99	0	0	0	0	0	0	0	0	0	0	0	0	0	0	0	0	0	0	0	0.709	0.721	0.728	0.749	2.016	0.688	0.846	0.000	0.000	0.000	0.000	0.000	0.000	0.000	0.000	0.000	0.000	0.000	0.000	0.000	0.000	120	521	18651	17525	-0.497	Error	Error	7735	10916	0	0	7342	10183	0	0	0	0
3	8	2	""	"YDR065W"	12400	14640	120	2404	2222	1051	80	84	32	99	98	0	6555	6039	2881	272	280	85	99	97	0	0	0	0	0	0	0	0	0	0	0	0	0	0	0	0	0	0	0	0.370	0.371	0.372	0.382	2.280	0.345	0.869	0.000	0.000	0.000	0.000	0.000	0.000	0.000	0.000	0.000	0.000	0.000	0.000	0.000	0.000	120	504	8607	7909	-1.435	Error	Error	2324	6283	0	0	2142	5767	0	0	0	0
3	9	2	"trp1"	"YDR007W"	12580	14640	120	444	430	167	82	86	29	94	91	0	611	600	245	279	283	76	85	79	0	0	0	0	0	0	0	0	0	0	0	0	0	0	0	0	0	0	0	1.090	1.084	0.896	0.958	2.168	0.830	0.572	0.000	0.000	0.000	0.000	0.000	0.000	0.000	0.000	0.000	0.000	0.000	0.000	0.000	0.000	120	437	694	669	0.125	Error	Error	362	332	0	0	348	321	0	0	0	0
3	10	2	"ARO3"	"YDR035W"	12750	14640	150	2683	2263	1236	85	95	98	89	86	0	3701	3255	1763	274	302	278	82	80	0	0	0	0	0	0	0	0	0	0	0	0	0	0	0	0	0	0	0	0.758	0.731	0.774	0.748	2.157	0.726	0.846	0.000	0.000	0.000	0.000	0.000	0.000	0.000	0.000	0.000	0.000	0.000	0.000	0.000	0.000	156	620	6025	5159	-0.400	Error	Error	2598	3427	0	0	2178	2981	0	0	0	0
3	11	2	""	"YDR067C"	12970	14640	120	2475	2174	1007	81	84	32	98	95	0	6839	6083	2724	265	279	112	94	90	0	0	0	0	0	0	0	0	0	0	0	0	0	0	0	0	0	0	0	0.364	0.360	0.352	0.406	2.415	0.332	0.865	0.000	0.000	0.000	0.000	0.000	0.000	0.000	0.000	0.000	0.000	0.000	0.000	0.000	0.000	120	530	8968	7911	-1.457	Error	Error	2394	6574	0	0	2093	5818	0	0	0	0
3	12	2	"GAL3"	"YDR009W"	13150	14640	120	2815	2594	950	82	86	32	100	100	0	2322	2218	766	264	277	111	97	96	0	0	0	0	0	0	0	0	0	0	0	0	0	0	0	0	0	0	0	1.328	1.286	1.298	1.297	1.740	1.307	0.817	0.000	0.000	0.000	0.000	0.000	0.000	0.000	0.000	0.000	0.000	0.000	0.000	0.000	0.000	120	515	4791	4466	0.409	Error	Error	2733	2058	0	0	2512	1954	0	0	0	0
3	13	2	"KRS1"	"YDR037W"	13350	14640	130	2380	2126	946	79	82	30	98	97	0	7581	6739	3044	259	265	75	98	96	0	0	0	0	0	0	0	0	0	0	0	0	0	0	0	0	0	0	0	0.314	0.316	0.308	0.340	2.040	0.285	0.843	0.000	0.000	0.000	0.000	0.000	0.000	0.000	0.000	0.000	0.000	0.000	0.000	0.000	0.000	120	595	9623	8527	-1.670	Error	Error	2301	7322	0	0	2047	6480	0	0	0	0
3	14	2	"DOA4"	"YDR069C"	13540	14640	120	213	221	100	76	79	29	89	80	0	748	729	259	252	260	78	91	88	0	0	0	0	0	0	0	0	0	0	0	0	0	0	0	0	0	0	0	0.276	0.304	0.269	0.251	2.060	0.279	0.547	0.000	0.000	0.000	0.000	0.000	0.000	0.000	0.000	0.000	0.000	0.000	0.000	0.000	0.000	120	534	633	622	-1.856	Error	Error	137	496	0	0	145	477	0	0	0	0
3	15	2	""	"YDR365W-B"	13730	14630	130	10233	9412	4785	78	83	35	100	100	0	12155	11199	5642	252	266	93	100	100	0	0	0	0	0	0	0	0	0	0	0	0	0	0	0	0	0	0	0	0.853	0.853	0.850	0.840	1.674	0.827	0.868	0.000	0.000	0.000	0.000	0.000	0.000	0.000	0.000	0.000	0.000	0.000	0.000	0.000	0.000	120	553	22058	20281	-0.229	Error	Error	10155	11903	0	0	9334	10947	0	0	0	0
3	16	2	"NCB2"	"YDR397C"	13910	14630	130	1112	1078	551	79	84	32	98	96	0	2486	2297	1059	256	270	95	95	94	0	0	0	0	0	0	0	0	0	0	0	0	0	0	0	0	0	0	0	0.463	0.489	0.484	0.504	2.039	0.479	0.866	0.000	0.000	0.000	0.000	0.000	0.000	0.000	0.000	0.000	0.000	0.000	0.000	0.000	0.000	120	576	3263	3040	-1.110	Error	Error	1033	2230	0	0	999	2041	0	0	0	0
3	17	2	"TIF35"	"YDR429C"	14120	14630	120	2273	2191	903	79	82	29	97	96	0	4094	3883	1628	256	267	85	95	94	0	0	0	0	0	0	0	0	0	0	0	0	0	0	0	0	0	0	0	0.572	0.582	0.575	0.576	1.592	0.545	0.860	0.000	0.000	0.000	0.000	0.000	0.000	0.000	0.000	0.000	0.000	0.000	0.000	0.000	0.000	120	536	6032	5739	-0.807	Error	Error	2194	3838	0	0	2112	3627	0	0	0	0
3	18	2	""	"YDR367W"	14310	14630	130	1639	1460	617	84	86	29	95	94	0	2029	1840	762	264	270	79	88	86	0	0	0	0	0	0	0	0	0	0	0	0	0	0	0	0	0	0	0	0.881	0.873	0.852	0.845	1.589	0.856	0.815	0.000	0.000	0.000	0.000	0.000	0.000	0.000	0.000	0.000	0.000	0.000	0.000	0.000	0.000	120	551	3320	2952	-0.183	Error	Error	1555	1765	0	0	1376	1576	0	0	0	0
3	19	2	"HPT1"	"YDR399W"	14500	14630	130	1513	1492	762	82	84	28	98	95	0	2336	2277	1028	264	271	73	94	92	0	0	0	0	0	0	0	0	0	0	0	0	0	0	0	0	0	0	0	0.691	0.700	0.721	0.684	1.773	0.685	0.858	0.000	0.000	0.000	0.000	0.000	0.000	0.000	0.000	0.000	0.000	0.000	0.000	0.000	0.000	120	532	3503	3423	-0.534	Error	Error	1431	2072	0	0	1410	2013	0	0	0	0
3	20	2	""	"YDR431W"	14690	14630	130	610	573	248	79	81	28	91	89	0	608	580	243	261	266	73	85	76	0	0	0	0	0	0	0	0	0	0	0	0	0	0	0	0	0	0	0	1.530	1.549	1.468	1.419	2.328	1.386	0.583	0.000	0.000	0.000	0.000	0.000	0.000	0.000	0.000	0.000	0.000	0.000	0.000	0.000	0.000	120	559	878	813	0.614	Error	Error	531	347	0	0	494	319	0	0	0	0
3	21	2	"xrs2"	"YDR369C"	14890	14640	130	2408	2303	974	80	82	29	100	99	0	4155	3994	1802	259	267	79	97	95	0	0	0	0	0	0	0	0	0	0	0	0	0	0	0	0	0	0	0	0.598	0.595	0.625	0.654	1.748	0.551	0.866	0.000	0.000	0.000	0.000	0.000	0.000	0.000	0.000	0.000	0.000	0.000	0.000	0.000	0.000	120	542	6224	5958	-0.743	Error	Error	2328	3896	0	0	2223	3735	0	0	0	0
3	22	2	""	"YDR401W"	15080	14630	130	1384	1288	686	84	87	33	92	89	0	3989	3895	2073	259	273	96	90	88	0	0	0	0	0	0	0	0	0	0	0	0	0	0	0	0	0	0	0	0.349	0.331	0.337	0.308	1.891	0.306	0.788	0.000	0.000	0.000	0.000	0.000	0.000	0.000	0.000	0.000	0.000	0.000	0.000	0.000	0.000	120	651	5030	4840	-1.521	Error	Error	1300	3730	0	0	1204	3636	0	0	0	0
3	1	3	""	"YDR433W"	11090	14830	120	435	488	302	72	74	28	91	90	0	748	755	382	250	258	76	86	84	0	0	0	0	0	0	0	0	0	0	0	0	0	0	0	0	0	0	0	0.729	0.824	0.763	0.655	2.163	0.747	0.727	0.000	0.000	0.000	0.000	0.000	0.000	0.000	0.000	0.000	0.000	0.000	0.000	0.000	0.000	120	589	861	921	-0.456	Error	Error	363	498	0	0	416	505	0	0	0	0
3	2	3	""	"YDR371W"	11280	14830	120	4013	3443	1433	74	77	28	99	97	0	7216	6338	2773	250	258	77	100	99	0	0	0	0	0	0	0	0	0	0	0	0	0	0	0	0	0	0	0	0.565	0.553	0.549	0.545	1.946	0.520	0.846	0.000	0.000	0.000	0.000	0.000	0.000	0.000	0.000	0.000	0.000	0.000	0.000	0.000	0.000	120	512	10905	9457	-0.823	Error	Error	3939	6966	0	0	3369	6088	0	0	0	0
3	3	3	"DIT1"	"YDR403W"	11470	14830	130	2151	2077	960	75	79	29	99	98	0	4241	4154	1882	252	263	99	95	93	0	0	0	0	0	0	0	0	0	0	0	0	0	0	0	0	0	0	0	0.520	0.513	0.529	0.539	1.882	0.484	0.867	0.000	0.000	0.000	0.000	0.000	0.000	0.000	0.000	0.000	0.000	0.000	0.000	0.000	0.000	120	542	6065	5904	-0.942	Error	Error	2076	3989	0	0	2002	3902	0	0	0	0
3	4	3	""	"YDR435C"	11660	14820	130	1465	1411	737	77	82	33	98	98	0	3441	3301	1569	262	272	84	98	96	0	0	0	0	0	0	0	0	0	0	0	0	0	0	0	0	0	0	0	0.437	0.439	0.431	0.416	1.789	0.415	0.843	0.000	0.000	0.000	0.000	0.000	0.000	0.000	0.000	0.000	0.000	0.000	0.000	0.000	0.000	120	584	4567	4373	-1.196	Error	Error	1388	3179	0	0	1334	3039	0	0	0	0
3	5	3	"SWI4"	"YER111C"	11870	14820	110	204	202	81	80	84	35	86	76	0	422	426	197	253	270	87	66	50	0	0	0	0	0	0	0	0	0	0	0	0	0	0	0	0	0	0	0	0.734	0.705	0.598	0.615	2.896	0.379	0.367	0.000	0.000	0.000	0.000	0.000	0.000	0.000	0.000	0.000	0.000	0.000	0.000	0.000	0.000	80	492	293	295	-0.447	Error	Error	124	169	0	0	122	173	0	0	0	0
3	6	3	""	"YER140W"	12050	14820	110	2176	2336	1463	77	110	238	96	87	0	1597	1661	812	252	287	204	90	88	0	0	0	0	0	0	0	0	0	0	0	0	0	0	0	0	0	0	0	1.561	1.603	1.539	1.511	1.617	1.699	0.828	0.000	0.000	0.000	0.000	0.000	0.000	0.000	0.000	0.000	0.000	0.000	0.000	0.000	0.000	80	499	3444	3668	0.642	Error	Error	2099	1345	0	0	2259	1409	0	0	0	0
3	7	3	"rad3"	"YER171W"	12240	14820	110	1796	1827	1174	81	129	268	90	82	0	4726	4983	2990	266	367	591	88	85	0	0	0	0	0	0	0	0	0	0	0	0	0	0	0	0	0	0	0	0.385	0.370	0.365	0.388	1.604	0.347	0.851	0.000	0.000	0.000	0.000	0.000	0.000	0.000	0.000	0.000	0.000	0.000	0.000	0.000	0.000	80	508	6175	6463	-1.379	Error	Error	1715	4460	0	0	1746	4717	0	0	0	0
3	8	3	""	"YER113C"	12450	14830	120	2419	2510	1303	84	99	127	98	95	0	3718	3418	1896	273	343	538	85	80	0	0	0	0	0	0	0	0	0	0	0	0	0	0	0	0	0	0	0	0.678	0.771	0.777	0.916	2.261	0.724	0.852	0.000	0.000	0.000	0.000	0.000	0.000	0.000	0.000	0.000	0.000	0.000	0.000	0.000	0.000	120	557	5780	5571	-0.561	Error	Error	2335	3445	0	0	2426	3145	0	0	0	0
3	9	3	"MAG1"	"YER142C"	12630	14820	110	911	906	537	82	86	29	96	92	0	1784	2001	1264	268	274	81	90	86	0	0	0	0	0	0	0	0	0	0	0	0	0	0	0	0	0	0	0	0.547	0.475	0.489	0.515	2.078	0.407	0.810	0.000	0.000	0.000	0.000	0.000	0.000	0.000	0.000	0.000	0.000	0.000	0.000	0.000	0.000	80	427	2345	2557	-0.871	Error	Error	829	1516	0	0	824	1733	0	0	0	0
3	10	3	"rad24"	"YER173W"	12820	14830	120	2002	2144	1265	80	83	28	98	98	0	1987	1918	1129	261	268	78	83	82	0	0	0	0	0	0	0	0	0	0	0	0	0	0	0	0	0	0	0	1.114	1.246	1.187	1.400	2.355	1.183	0.861	0.000	0.000	0.000	0.000	0.000	0.000	0.000	0.000	0.000	0.000	0.000	0.000	0.000	0.000	120	535	3648	3721	0.155	Error	Error	1922	1726	0	0	2064	1657	0	0	0	0
3	11	3	"spr6"	"YER115C"	13010	14820	110	1519	1366	706	81	91	81	93	86	0	1184	1065	532	263	281	132	80	80	0	0	0	0	0	0	0	0	0	0	0	0	0	0	0	0	0	0	0	1.561	1.602	1.455	1.453	1.578	1.538	0.763	0.000	0.000	0.000	0.000	0.000	0.000	0.000	0.000	0.000	0.000	0.000	0.000	0.000	0.000	80	478	2359	2087	0.643	Error	Error	1438	921	0	0	1285	802	0	0	0	0
3	12	3	"UBP5"	"YER144C"	13200	14820	110	1321	1401	999	83	95	87	93	85	0	2767	2968	2117	263	285	185	82	80	0	0	0	0	0	0	0	0	0	0	0	0	0	0	0	0	0	0	0	0.494	0.487	0.472	0.512	1.949	0.438	0.862	0.000	0.000	0.000	0.000	0.000	0.000	0.000	0.000	0.000	0.000	0.000	0.000	0.000	0.000	80	503	3742	4023	-1.016	Error	Error	1238	2504	0	0	1318	2705	0	0	0	0
3	13	3	""	"YER175C"	13390	14820	110	2393	2042	1048	81	90	72	95	90	0	2183	1879	983	265	284	185	81	80	0	0	0	0	0	0	0	0	0	0	0	0	0	0	0	0	0	0	0	1.205	1.215	1.220	1.219	1.603	1.155	0.879	0.000	0.000	0.000	0.000	0.000	0.000	0.000	0.000	0.000	0.000	0.000	0.000	0.000	0.000	80	497	4230	3575	0.270	Error	Error	2312	1918	0	0	1961	1614	0	0	0	0
3	14	3	"RPL23B"	"YER117W"	13580	14820	110	3082	2764	1398	86	97	102	92	88	0	5307	4544	2451	269	296	199	83	81	0	0	0	0	0	0	0	0	0	0	0	0	0	0	0	0	0	0	0	0.595	0.626	0.643	0.777	2.039	0.584	0.895	0.000	0.000	0.000	0.000	0.000	0.000	0.000	0.000	0.000	0.000	0.000	0.000	0.000	0.000	80	502	8034	6953	-0.750	Error	Error	2996	5038	0	0	2678	4275	0	0	0	0
3	15	3	"LSM5"	"YER146W"	13770	14820	110	268	259	118	87	96	87	77	53	0	521	498	248	261	289	188	62	36	0	0	0	0	0	0	0	0	0	0	0	0	0	0	0	0	0	0	0	0.696	0.726	0.625	0.566	2.423	0.457	0.500	0.000	0.000	0.000	0.000	0.000	0.000	0.000	0.000	0.000	0.000	0.000	0.000	0.000	0.000	80	507	441	409	-0.523	Error	Error	181	260	0	0	172	237	0	0	0	0
3	16	3	"bmh1"	"YER177W"	13970	14830	120	2429	2327	954	89	95	38	96	95	0	3157	2841	1333	265	285	98	90	88	0	0	0	0	0	0	0	0	0	0	0	0	0	0	0	0	0	0	0	0.809	0.869	0.854	0.924	2.242	0.814	0.840	0.000	0.000	0.000	0.000	0.000	0.000	0.000	0.000	0.000	0.000	0.000	0.000	0.000	0.000	120	556	5232	4814	-0.306	Error	Error	2340	2892	0	0	2238	2576	0	0	0	0
3	17	3	"cup2"	"YGL166W"	14160	14830	120	1820	1642	784	88	92	32	96	95	0	2405	2097	1106	273	285	95	85	83	0	0	0	0	0	0	0	0	0	0	0	0	0	0	0	0	0	0	0	0.812	0.852	0.833	0.886	2.085	0.797	0.864	0.000	0.000	0.000	0.000	0.000	0.000	0.000	0.000	0.000	0.000	0.000	0.000	0.000	0.000	120	515	3864	3378	-0.300	Error	Error	1732	2132	0	0	1554	1824	0	0	0	0
3	18	3	""	"YGL198W"	14350	14830	120	1685	1586	755	85	88	30	98	98	0	1054	974	424	273	284	88	87	84	0	0	0	0	0	0	0	0	0	0	0	0	0	0	0	0	0	0	0	2.049	2.141	2.061	2.040	1.778	2.112	0.793	0.000	0.000	0.000	0.000	0.000	0.000	0.000	0.000	0.000	0.000	0.000	0.000	0.000	0.000	120	536	2381	2202	1.035	Error	Error	1600	781	0	0	1501	701	0	0	0	0
3	19	3	"SAP4"	"YGL229C"	14540	14830	120	2149	2362	1249	83	85	33	97	97	0	3538	3560	1868	268	285	168	94	90	0	0	0	0	0	0	0	0	0	0	0	0	0	0	0	0	0	0	0	0.632	0.692	0.722	0.717	2.148	0.670	0.841	0.000	0.000	0.000	0.000	0.000	0.000	0.000	0.000	0.000	0.000	0.000	0.000	0.000	0.000	120	535	5336	5571	-0.662	Error	Error	2066	3270	0	0	2279	3292	0	0	0	0
3	20	3	""	"YGL168W"	14730	14830	120	795	718	324	81	84	28	95	95	0	2422	2055	1019	266	279	85	87	85	0	0	0	0	0	0	0	0	0	0	0	0	0	0	0	0	0	0	0	0.331	0.356	0.340	0.393	2.341	0.318	0.833	0.000	0.000	0.000	0.000	0.000	0.000	0.000	0.000	0.000	0.000	0.000	0.000	0.000	0.000	120	499	2870	2426	-1.594	Error	Error	714	2156	0	0	637	1789	0	0	0	0
3	21	3	"EMP24"	"YGL200C"	14910	14830	120	1779	1702	872	87	97	126	95	90	0	1383	1311	735	266	288	178	79	75	0	0	0	0	0	0	0	0	0	0	0	0	0	0	0	0	0	0	0	1.515	1.545	1.481	1.472	2.162	1.413	0.834	0.000	0.000	0.000	0.000	0.000	0.000	0.000	0.000	0.000	0.000	0.000	0.000	0.000	0.000	120	526	2809	2660	0.599	Error	Error	1692	1117	0	0	1615	1045	0	0	0	0
3	22	3	""	"YGL231C"	15110	14830	120	1964	1810	938	93	101	53	94	94	0	5101	4657	2423	273	296	144	94	90	0	0	0	0	0	0	0	0	0	0	0	0	0	0	0	0	0	0	0	0.388	0.392	0.408	0.404	2.022	0.373	0.868	0.000	0.000	0.000	0.000	0.000	0.000	0.000	0.000	0.000	0.000	0.000	0.000	0.000	0.000	120	623	6699	6101	-1.368	Error	Error	1871	4828	0	0	1717	4384	0	0	0	0
3	1	4	""	"YGL170C"	11120	15020	120	1815	1661	799	70	73	26	96	95	0	4091	3895	2084	248	256	75	95	95	0	0	0	0	0	0	0	0	0	0	0	0	0	0	0	0	0	0	0	0.454	0.436	0.429	0.456	2.289	0.381	0.825	0.000	0.000	0.000	0.000	0.000	0.000	0.000	0.000	0.000	0.000	0.000	0.000	0.000	0.000	120	576	5588	5238	-1.139	Error	Error	1745	3843	0	0	1591	3647	0	0	0	0
3	2	4	"ARO8"	"YGL202W"	11310	15020	120	3008	2953	1239	75	78	29	100	100	0	6047	5573	2206	250	261	108	100	99	0	0	0	0	0	0	0	0	0	0	0	0	0	0	0	0	0	0	0	0.506	0.541	0.555	0.547	1.712	0.526	0.873	0.000	0.000	0.000	0.000	0.000	0.000	0.000	0.000	0.000	0.000	0.000	0.000	0.000	0.000	120	496	8730	8201	-0.983	Error	Error	2933	5797	0	0	2878	5323	0	0	0	0
3	3	4	"SEC15"	"YGL233W"	11500	15020	120	1574	1846	1298	78	82	31	97	95	0	2249	2617	1741	259	271	111	90	87	0	0	0	0	0	0	0	0	0	0	0	0	0	0	0	0	0	0	0	0.752	0.750	0.759	0.889	2.768	0.698	0.795	0.000	0.000	0.000	0.000	0.000	0.000	0.000	0.000	0.000	0.000	0.000	0.000	0.000	0.000	120	502	3486	4126	-0.412	Error	Error	1496	1990	0	0	1768	2358	0	0	0	0
3	4	4	"NUP49"	"YGL172W"	11690	15020	120	2856	2541	1089	84	89	41	100	97	0	2241	2116	864	269	282	101	96	94	0	0	0	0	0	0	0	0	0	0	0	0	0	0	0	0	0	0	0	1.406	1.330	1.354	1.349	1.875	1.311	0.861	0.000	0.000	0.000	0.000	0.000	0.000	0.000	0.000	0.000	0.000	0.000	0.000	0.000	0.000	120	563	4744	4304	0.491	Error	Error	2772	1972	0	0	2457	1847	0	0	0	0
3	5	4	""	"YGL204C"	11890	15020	120	747	702	331	87	89	32	95	93	0	1214	1111	568	259	274	86	85	82	0	0	0	0	0	0	0	0	0	0	0	0	0	0	0	0	0	0	0	0.691	0.722	0.717	0.720	2.089	0.144	0.162	0.000	0.000	0.000	0.000	0.000	0.000	0.000	0.000	0.000	0.000	0.000	0.000	0.000	0.000	120	555	1615	1467	-0.533	Error	Error	660	955	0	0	615	852	0	0	0	0
3	6	4	""	"YGL235W"	12070	15020	110	1418	1395	667	89	111	167	93	88	0	1167	1185	529	264	292	177	87	81	0	0	0	0	0	0	0	0	0	0	0	0	0	0	0	0	0	0	0	1.472	1.418	1.452	1.552	2.055	1.320	0.830	0.000	0.000	0.000	0.000	0.000	0.000	0.000	0.000	0.000	0.000	0.000	0.000	0.000	0.000	80	515	2232	2227	0.558	Error	Error	1329	903	0	0	1306	921	0	0	0	0
3	7	4	"RTT102"	"YGR275W"	12280	15020	120	1353	1255	496	87	107	139	95	90	0	1198	1109	485	263	312	390	79	66	0	0	0	0	0	0	0	0	0	0	0	0	0	0	0	0	0	0	0	1.354	1.381	1.399	1.427	1.990	1.302	0.741	0.000	0.000	0.000	0.000	0.000	0.000	0.000	0.000	0.000	0.000	0.000	0.000	0.000	0.000	120	623	2201	2014	0.437	Error	Error	1266	935	0	0	1168	846	0	0	0	0
3	8	4	""	"YHL009W-B"	12460	15020	110	284	290	114	83	85	28	91	90	0	646	642	308	261	266	75	83	80	0	0	0	0	0	0	0	0	0	0	0	0	0	0	0	0	0	0	0	0.522	0.543	0.486	0.451	2.486	0.350	0.494	0.000	0.000	0.000	0.000	0.000	0.000	0.000	0.000	0.000	0.000	0.000	0.000	0.000	0.000	80	457	586	588	-0.938	Error	Error	201	385	0	0	207	381	0	0	0	0
3	9	4	""	"YHL041W"	12650	15020	120	1015	942	459	81	84	27	95	91	0	1358	1314	654	262	268	87	86	85	0	0	0	0	0	0	0	0	0	0	0	0	0	0	0	0	0	0	0	0.852	0.818	0.855	0.780	2.331	0.744	0.794	0.000	0.000	0.000	0.000	0.000	0.000	0.000	0.000	0.000	0.000	0.000	0.000	0.000	0.000	120	601	2030	1913	-0.231	Error	Error	934	1096	0	0	861	1052	0	0	0	0
3	10	4	""	"YGR277C"	12860	15020	120	2968	2806	1225	81	84	29	100	100	0	1990	1840	874	269	277	89	90	86	0	0	0	0	0	0	0	0	0	0	0	0	0	0	0	0	0	0	0	1.678	1.735	1.738	1.997	2.150	1.705	0.855	0.000	0.000	0.000	0.000	0.000	0.000	0.000	0.000	0.000	0.000	0.000	0.000	0.000	0.000	120	551	4608	4296	0.746	Error	Error	2887	1721	0	0	2725	1571	0	0	0	0
3	11	4	"PRS3"	"YHL011C"	13030	15010	110	3524	3247	1682	84	96	91	95	91	0	4280	3995	2189	265	283	113	92	88	0	0	0	0	0	0	0	0	0	0	0	0	0	0	0	0	0	0	0	0.857	0.848	0.837	0.874	2.308	0.778	0.868	0.000	0.000	0.000	0.000	0.000	0.000	0.000	0.000	0.000	0.000	0.000	0.000	0.000	0.000	80	493	7455	6893	-0.223	Error	Error	3440	4015	0	0	3163	3730	0	0	0	0
3	12	4	"ECM34"	"YHL043W"	13220	15010	110	1955	1778	961	87	97	70	91	86	0	3693	3164	1750	260	282	178	82	80	0	0	0	0	0	0	0	0	0	0	0	0	0	0	0	0	0	0	0	0.544	0.582	0.578	0.550	1.726	0.540	0.876	0.000	0.000	0.000	0.000	0.000	0.000	0.000	0.000	0.000	0.000	0.000	0.000	0.000	0.000	80	544	5301	4595	-0.878	Error	Error	1868	3433	0	0	1691	2904	0	0	0	0
3	13	4	"SCW4"	"YGR279C"	13420	15020	120	2395	2208	1112	84	92	66	96	95	0	3400	3087	1495	260	273	109	88	86	0	0	0	0	0	0	0	0	0	0	0	0	0	0	0	0	0	0	0	0.736	0.751	0.808	0.851	2.446	0.737	0.864	0.000	0.000	0.000	0.000	0.000	0.000	0.000	0.000	0.000	0.000	0.000	0.000	0.000	0.000	120	599	5451	4951	-0.442	Error	Error	2311	3140	0	0	2124	2827	0	0	0	0
3	14	4	""	"YHL013C"	13600	15010	110	2736	2281	1183	84	98	103	91	86	0	5541	4613	2387	262	295	228	86	83	0	0	0	0	0	0	0	0	0	0	0	0	0	0	0	0	0	0	0	0.502	0.505	0.529	0.582	2.220	0.489	0.888	0.000	0.000	0.000	0.000	0.000	0.000	0.000	0.000	0.000	0.000	0.000	0.000	0.000	0.000	80	492	7931	6548	-0.993	Error	Error	2652	5279	0	0	2197	4351	0	0	0	0
3	15	4	""	"YHL045W"	13790	15020	120	7639	6981	3690	93	99	59	99	97	0	11202	9993	5087	264	288	156	97	95	0	0	0	0	0	0	0	0	0	0	0	0	0	0	0	0	0	0	0	0.690	0.708	0.747	0.723	1.953	0.700	0.893	0.000	0.000	0.000	0.000	0.000	0.000	0.000	0.000	0.000	0.000	0.000	0.000	0.000	0.000	120	554	18484	16617	-0.536	Error	Error	7546	10938	0	0	6888	9729	0	0	0	0
3	16	4	"YOR1"	"YGR281W"	13980	15020	120	557	582	284	98	104	39	94	93	0	1263	1271	679	273	291	95	86	85	0	0	0	0	0	0	0	0	0	0	0	0	0	0	0	0	0	0	0	0.464	0.485	0.509	0.500	2.015	0.389	0.687	0.000	0.000	0.000	0.000	0.000	0.000	0.000	0.000	0.000	0.000	0.000	0.000	0.000	0.000	120	498	1449	1482	-1.109	Error	Error	459	990	0	0	484	998	0	0	0	0
3	17	4	"RPS20"	"YHL015W"	14170	15020	120	1140	1033	506	91	96	34	95	94	0	1601	1449	788	282	291	90	85	81	0	0	0	0	0	0	0	0	0	0	0	0	0	0	0	0	0	0	0	0.795	0.807	0.805	0.792	1.817	0.707	0.833	0.000	0.000	0.000	0.000	0.000	0.000	0.000	0.000	0.000	0.000	0.000	0.000	0.000	0.000	120	518	2368	2109	-0.330	Error	Error	1049	1319	0	0	942	1167	0	0	0	0
3	18	4	""	"YHL047C"	14360	15020	110	2497	2492	1623	90	97	50	96	93	0	3514	3454	2238	277	297	151	86	83	0	0	0	0	0	0	0	0	0	0	0	0	0	0	0	0	0	0	0	0.744	0.756	0.743	0.882	1.949	0.701	0.883	0.000	0.000	0.000	0.000	0.000	0.000	0.000	0.000	0.000	0.000	0.000	0.000	0.000	0.000	80	465	5644	5579	-0.427	Error	Error	2407	3237	0	0	2402	3177	0	0	0	0
3	19	4	""	"YIL077C"	14540	15020	110	2701	2449	1319	91	118	173	85	82	0	5272	4620	2729	276	376	555	83	76	0	0	0	0	0	0	0	0	0	0	0	0	0	0	0	0	0	0	0	0.522	0.543	0.545	0.544	1.733	0.494	0.885	0.000	0.000	0.000	0.000	0.000	0.000	0.000	0.000	0.000	0.000	0.000	0.000	0.000	0.000	80	490	7606	6702	-0.937	Error	Error	2610	4996	0	0	2358	4344	0	0	0	0
3	20	4	"SEC24"	"YIL109C"	14750	15020	120	3178	2876	1553	86	110	163	95	90	0	4719	4196	2106	276	360	525	90	84	0	0	0	0	0	0	0	0	0	0	0	0	0	0	0	0	0	0	0	0.696	0.712	0.729	0.688	2.080	0.709	0.894	0.000	0.000	0.000	0.000	0.000	0.000	0.000	0.000	0.000	0.000	0.000	0.000	0.000	0.000	120	527	7535	6710	-0.523	Error	Error	3092	4443	0	0	2790	3920	0	0	0	0
3	21	4	""	"YIL141W"	14920	15030	110	1940	1587	787	87	121	216	83	82	0	1765	1483	790	272	317	265	81	76	0	0	0	0	0	0	0	0	0	0	0	0	0	0	0	0	0	0	0	1.241	1.239	1.209	1.170	1.874	1.120	0.878	0.000	0.000	0.000	0.000	0.000	0.000	0.000	0.000	0.000	0.000	0.000	0.000	0.000	0.000	80	458	3346	2711	0.312	Error	Error	1853	1493	0	0	1500	1211	0	0	0	0
3	22	4	""	"YIL079C"	15120	15020	110	3013	2641	1368	97	127	190	86	83	0	4122	3415	1888	281	320	250	85	82	0	0	0	0	0	0	0	0	0	0	0	0	0	0	0	0	0	0	0	0.759	0.812	0.799	0.846	1.755	0.754	0.883	0.000	0.000	0.000	0.000	0.000	0.000	0.000	0.000	0.000	0.000	0.000	0.000	0.000	0.000	80	516	6757	5678	-0.397	Error	Error	2916	3841	0	0	2544	3134	0	0	0	0
3	1	5	"COX5b"	"YIL111W"	11130	15210	120	1440	1333	712	73	76	28	93	90	0	2614	2525	1491	245	252	72	90	85	0	0	0	0	0	0	0	0	0	0	0	0	0	0	0	0	0	0	0	0.577	0.553	0.535	0.541	2.159	0.494	0.858	0.000	0.000	0.000	0.000	0.000	0.000	0.000	0.000	0.000	0.000	0.000	0.000	0.000	0.000	120	580	3736	3540	-0.793	Error	Error	1367	2369	0	0	1260	2280	0	0	0	0
3	2	5	"SSL2"	"YIL143C"	11320	15210	120	2603	2640	1275	80	82	32	100	100	0	4220	4361	2193	259	269	100	98	97	0	0	0	0	0	0	0	0	0	0	0	0	0	0	0	0	0	0	0	0.637	0.624	0.635	0.660	1.969	0.576	0.834	0.000	0.000	0.000	0.000	0.000	0.000	0.000	0.000	0.000	0.000	0.000	0.000	0.000	0.000	120	508	6484	6662	-0.651	Error	Error	2523	3961	0	0	2560	4102	0	0	0	0
3	3	5	""	"YIL082W"	11520	15210	120	9999	9096	4693	86	89	34	100	99	0	11925	10320	4843	269	282	104	100	99	0	0	0	0	0	0	0	0	0	0	0	0	0	0	0	0	0	0	0	0.850	0.896	0.894	0.863	1.844	0.913	0.887	0.000	0.000	0.000	0.000	0.000	0.000	0.000	0.000	0.000	0.000	0.000	0.000	0.000	0.000	120	511	21569	19061	-0.234	Error	Error	9913	11656	0	0	9010	10051	0	0	0	0
3	4	5	""	"YIL113W"	11700	15220	110	1366	1227	638	91	95	43	93	88	0	1058	985	529	273	287	100	78	75	0	0	0	0	0	0	0	0	0	0	0	0	0	0	0	0	0	0	0	1.624	1.596	1.479	1.558	1.802	1.493	0.794	0.000	0.000	0.000	0.000	0.000	0.000	0.000	0.000	0.000	0.000	0.000	0.000	0.000	0.000	80	469	2060	1848	0.700	Error	Error	1275	785	0	0	1136	712	0	0	0	0
3	5	5	""	"YIL145C"	11900	15210	120	3004	2748	1355	91	96	42	98	98	0	1823	1642	794	265	279	96	87	83	0	0	0	0	0	0	0	0	0	0	0	0	0	0	0	0	0	0	0	1.870	1.930	1.933	1.948	2.149	1.946	0.823	0.000	0.000	0.000	0.000	0.000	0.000	0.000	0.000	0.000	0.000	0.000	0.000	0.000	0.000	120	539	4471	4034	0.903	Error	Error	2913	1558	0	0	2657	1377	0	0	0	0
3	6	5	""	"YIL083C"	12080	15210	110	2079	1775	858	90	99	69	92	90	0	1972	1760	887	266	283	115	85	81	0	0	0	0	0	0	0	0	0	0	0	0	0	0	0	0	0	0	0	1.166	1.128	1.095	1.169	1.723	1.068	0.870	0.000	0.000	0.000	0.000	0.000	0.000	0.000	0.000	0.000	0.000	0.000	0.000	0.000	0.000	80	472	3695	3179	0.221	Error	Error	1989	1706	0	0	1685	1494	0	0	0	0
3	7	5	"NUP159"	"YIL115C"	12260	15220	110	299	317	169	87	95	67	80	75	0	547	566	325	274	300	199	68	31	0	0	0	0	0	0	0	0	0	0	0	0	0	0	0	0	0	0	0	0.777	0.788	0.705	0.643	2.213	0.397	0.475	0.000	0.000	0.000	0.000	0.000	0.000	0.000	0.000	0.000	0.000	0.000	0.000	0.000	0.000	80	472	485	522	-0.365	Error	Error	212	273	0	0	230	292	0	0	0	0
3	8	5	"SLN1"	"YIL147C"	12450	15220	120	2284	2328	1244	85	90	46	99	98	0	3641	3414	2132	265	285	176	87	82	0	0	0	0	0	0	0	0	0	0	0	0	0	0	0	0	0	0	0	0.651	0.712	0.694	0.778	2.203	0.626	0.831	0.000	0.000	0.000	0.000	0.000	0.000	0.000	0.000	0.000	0.000	0.000	0.000	0.000	0.000	120	555	5575	5392	-0.618	Error	Error	2199	3376	0	0	2243	3149	0	0	0	0
3	9	5	""	"YJR015W"	12640	15210	110	1946	1705	912	86	95	94	90	86	0	4850	4210	2408	271	299	279	90	85	0	0	0	0	0	0	0	0	0	0	0	0	0	0	0	0	0	0	0	0.406	0.411	0.399	0.401	1.919	0.379	0.882	0.000	0.000	0.000	0.000	0.000	0.000	0.000	0.000	0.000	0.000	0.000	0.000	0.000	0.000	80	466	6439	5558	-1.300	Error	Error	1860	4579	0	0	1619	3939	0	0	0	0
3	10	5	"ANB1"	"YJR047C"	12820	15210	110	1767	1455	747	87	106	133	82	81	0	1685	1410	760	284	321	294	73	73	0	0	0	0	0	0	0	0	0	0	0	0	0	0	0	0	0	0	0	1.199	1.215	1.158	1.204	2.183	1.116	0.830	0.000	0.000	0.000	0.000	0.000	0.000	0.000	0.000	0.000	0.000	0.000	0.000	0.000	0.000	80	487	3081	2494	0.262	Error	Error	1680	1401	0	0	1368	1126	0	0	0	0
3	11	5	""	"YJR079W"	13010	15210	110	219	224	126	91	103	99	58	23	0	549	571	371	277	303	148	73	45	0	0	0	0	0	0	0	0	0	0	0	0	0	0	0	0	0	0	0	0.471	0.452	0.367	0.350	2.212	0.295	0.577	0.000	0.000	0.000	0.000	0.000	0.000	0.000	0.000	0.000	0.000	0.000	0.000	0.000	0.000	80	528	400	427	-1.087	Error	Error	128	272	0	0	133	294	0	0	0	0
3	12	5	"ess1"	"YJR017C"	13200	15220	110	948	780	384	89	97	56	83	82	0	1029	912	464	266	288	114	77	75	0	0	0	0	0	0	0	0	0	0	0	0	0	0	0	0	0	0	0	1.126	1.070	0.930	0.892	1.860	0.957	0.798	0.000	0.000	0.000	0.000	0.000	0.000	0.000	0.000	0.000	0.000	0.000	0.000	0.000	0.000	80	523	1622	1337	0.171	Error	Error	859	763	0	0	691	646	0	0	0	0
3	13	5	"UTR1"	"YJR049C"	13390	15210	110	2404	2330	1337	85	99	89	87	85	0	2372	2209	1386	269	287	146	77	75	0	0	0	0	0	0	0	0	0	0	0	0	0	0	0	0	0	0	0	1.103	1.157	1.102	1.282	2.714	1.051	0.852	0.000	0.000	0.000	0.000	0.000	0.000	0.000	0.000	0.000	0.000	0.000	0.000	0.000	0.000	80	485	4422	4185	0.141	Error	Error	2319	2103	0	0	2245	1940	0	0	0	0
3	14	5	""	"YJR082C"	13570	15210	110	1462	1239	610	87	118	179	82	80	0	1885	1567	805	270	315	273	78	76	0	0	0	0	0	0	0	0	0	0	0	0	0	0	0	0	0	0	0	0.851	0.888	0.822	0.819	2.184	0.830	0.845	0.000	0.000	0.000	0.000	0.000	0.000	0.000	0.000	0.000	0.000	0.000	0.000	0.000	0.000	80	506	2990	2449	-0.232	Error	Error	1375	1615	0	0	1152	1297	0	0	0	0
3	15	5	"TES1"	"YJR019C"	13770	15210	120	1419	1293	591	93	114	155	89	86	0	1408	1309	618	266	308	245	85	76	0	0	0	0	0	0	0	0	0	0	0	0	0	0	0	0	0	0	0	1.161	1.151	1.114	1.062	1.955	1.069	0.809	0.000	0.000	0.000	0.000	0.000	0.000	0.000	0.000	0.000	0.000	0.000	0.000	0.000	0.000	120	543	2468	2243	0.216	Error	Error	1326	1142	0	0	1200	1043	0	0	0	0
3	16	5	"osm1"	"YJR051W"	13960	15210	120	3845	3270	1719	95	99	36	97	94	0	4842	4253	2265	270	284	91	92	90	0	0	0	0	0	0	0	0	0	0	0	0	0	0	0	0	0	0	0	0.820	0.797	0.800	0.841	2.512	0.783	0.881	0.000	0.000	0.000	0.000	0.000	0.000	0.000	0.000	0.000	0.000	0.000	0.000	0.000	0.000	120	494	8322	7158	-0.286	Error	Error	3750	4572	0	0	3175	3983	0	0	0	0
3	17	5	""	"YJR084W"	14150	15210	120	2446	2101	1005	94	99	60	94	91	0	2987	2629	1281	284	296	122	92	87	0	0	0	0	0	0	0	0	0	0	0	0	0	0	0	0	0	0	0	0.870	0.856	0.870	0.872	2.098	0.856	0.849	0.000	0.000	0.000	0.000	0.000	0.000	0.000	0.000	0.000	0.000	0.000	0.000	0.000	0.000	120	509	5055	4352	-0.201	Error	Error	2352	2703	0	0	2007	2345	0	0	0	0
3	18	5	"rec107"	"YJR021C"	14340	15210	120	1985	1901	984	92	96	46	99	97	0	2080	1903	935	285	296	123	90	87	0	0	0	0	0	0	0	0	0	0	0	0	0	0	0	0	0	0	0	1.055	1.118	1.143	1.137	1.897	1.099	0.881	0.000	0.000	0.000	0.000	0.000	0.000	0.000	0.000	0.000	0.000	0.000	0.000	0.000	0.000	120	510	3688	3427	0.077	Error	Error	1893	1795	0	0	1809	1618	0	0	0	0
3	19	5	"BFA1"	"YJR053W"	14520	15210	120	2193	2033	1017	87	102	130	94	88	0	2565	2387	1254	272	313	354	85	80	0	0	0	0	0	0	0	0	0	0	0	0	0	0	0	0	0	0	0	0.918	0.920	0.910	0.899	1.819	0.863	0.859	0.000	0.000	0.000	0.000	0.000	0.000	0.000	0.000	0.000	0.000	0.000	0.000	0.000	0.000	120	506	4399	4061	-0.123	Error	Error	2106	2293	0	0	1946	2115	0	0	0	0
3	20	5	"ste18"	"YJR086W"	14710	15210	120	1073	944	462	84	87	34	95	91	0	1331	1163	602	266	278	106	84	78	0	0	0	0	0	0	0	0	0	0	0	0	0	0	0	0	0	0	0	0.929	0.959	0.959	0.949	2.052	0.861	0.780	0.000	0.000	0.000	0.000	0.000	0.000	0.000	0.000	0.000	0.000	0.000	0.000	0.000	0.000	120	506	2054	1757	-0.107	Error	Error	989	1065	0	0	860	897	0	0	0	0
3	21	5	""	"YKR007W"	14900	15210	120	2469	2046	978	86	90	36	96	94	0	1527	1412	649	273	279	78	90	85	0	0	0	0	0	0	0	0	0	0	0	0	0	0	0	0	0	0	0	1.900	1.721	1.752	1.677	1.717	1.671	0.843	0.000	0.000	0.000	0.000	0.000	0.000	0.000	0.000	0.000	0.000	0.000	0.000	0.000	0.000	120	496	3637	3099	0.926	Error	Error	2383	1254	0	0	1960	1139	0	0	0	0
3	22	5	""	"YKR038C"	15090	15210	120	2624	2388	997	94	98	44	100	100	0	2120	1880	754	285	288	96	95	94	0	0	0	0	0	0	0	0	0	0	0	0	0	0	0	0	0	0	0	1.379	1.438	1.470	1.466	1.787	1.402	0.874	0.000	0.000	0.000	0.000	0.000	0.000	0.000	0.000	0.000	0.000	0.000	0.000	0.000	0.000	120	626	4365	3889	0.463	Error	Error	2530	1835	0	0	2294	1595	0	0	0	0
3	1	6	""	"YKR070W"	11100	15400	120	2033	1722	792	79	83	31	99	99	0	5825	5094	2435	255	263	126	99	99	0	0	0	0	0	0	0	0	0	0	0	0	0	0	0	0	0	0	0	0.351	0.340	0.345	0.330	2.047	0.310	0.865	0.000	0.000	0.000	0.000	0.000	0.000	0.000	0.000	0.000	0.000	0.000	0.000	0.000	0.000	120	579	7524	6482	-1.511	Error	Error	1954	5570	0	0	1643	4839	0	0	0	0
3	2	6	"FOX2"	"YKR009C"	11300	15400	120	2561	2679	1433	86	88	32	100	100	0	6801	6628	3491	266	270	83	97	97	0	0	0	0	0	0	0	0	0	0	0	0	0	0	0	0	0	0	0	0.379	0.408	0.420	0.425	1.970	0.388	0.876	0.000	0.000	0.000	0.000	0.000	0.000	0.000	0.000	0.000	0.000	0.000	0.000	0.000	0.000	120	496	9010	8955	-1.401	Error	Error	2475	6535	0	0	2593	6362	0	0	0	0
3	3	6	""	"YKR040C"	11480	15400	120	1265	1122	525	85	87	33	95	93	0	1205	1110	532	258	268	92	85	83	0	0	0	0	0	0	0	0	0	0	0	0	0	0	0	0	0	0	0	1.246	1.217	1.202	1.150	1.770	1.116	0.782	0.000	0.000	0.000	0.000	0.000	0.000	0.000	0.000	0.000	0.000	0.000	0.000	0.000	0.000	120	488	2127	1889	0.317	Error	Error	1180	947	0	0	1037	852	0	0	0	0
3	4	6	"sis2"	"YKR072C"	11660	15390	110	4210	3794	2071	87	109	223	91	87	0	4229	3966	2065	255	296	292	95	92	0	0	0	0	0	0	0	0	0	0	0	0	0	0	0	0	0	0	0	1.037	0.999	0.984	0.959	1.939	0.998	0.865	0.000	0.000	0.000	0.000	0.000	0.000	0.000	0.000	0.000	0.000	0.000	0.000	0.000	0.000	80	468	8097	7418	0.053	Error	Error	4123	3974	0	0	3707	3711	0	0	0	0
3	5	6	""	"YKR011C"	11850	15390	110	2149	1840	895	95	120	227	88	82	0	1564	1419	671	269	308	292	82	77	0	0	0	0	0	0	0	0	0	0	0	0	0	0	0	0	0	0	0	1.586	1.517	1.530	1.448	1.557	1.463	0.822	0.000	0.000	0.000	0.000	0.000	0.000	0.000	0.000	0.000	0.000	0.000	0.000	0.000	0.000	80	487	3349	2895	0.665	Error	Error	2054	1295	0	0	1745	1150	0	0	0	0
3	6	6	"UTH1"	"YKR042W"	12040	15400	120	2399	2131	847	90	99	78	100	100	0	3561	3193	1290	271	283	100	96	95	0	0	0	0	0	0	0	0	0	0	0	0	0	0	0	0	0	0	0	0.702	0.698	0.709	0.771	2.148	0.655	0.882	0.000	0.000	0.000	0.000	0.000	0.000	0.000	0.000	0.000	0.000	0.000	0.000	0.000	0.000	120	547	5599	4963	-0.511	Error	Error	2309	3290	0	0	2041	2922	0	0	0	0
3	7	6	""	"YKR074W"	12230	15390	110	1178	986	479	83	90	54	88	83	0	3348	2884	1425	268	292	208	88	81	0	0	0	0	0	0	0	0	0	0	0	0	0	0	0	0	0	0	0	0.356	0.345	0.355	0.347	1.728	0.320	0.877	0.000	0.000	0.000	0.000	0.000	0.000	0.000	0.000	0.000	0.000	0.000	0.000	0.000	0.000	80	469	4175	3519	-1.492	Error	Error	1095	3080	0	0	903	2616	0	0	0	0
3	8	6	"PRY2"	"YKR013W"	12420	15400	120	2168	1936	894	85	93	53	96	95	0	2591	2295	1052	271	296	201	91	87	0	0	0	0	0	0	0	0	0	0	0	0	0	0	0	0	0	0	0	0.898	0.915	0.944	0.924	1.798	0.864	0.856	0.000	0.000	0.000	0.000	0.000	0.000	0.000	0.000	0.000	0.000	0.000	0.000	0.000	0.000	120	515	4403	3875	-0.155	Error	Error	2083	2320	0	0	1851	2024	0	0	0	0
3	9	6	""	"YKR044W"	12620	15400	120	3380	3239	1589	89	99	91	100	98	0	7342	6494	3148	280	302	250	100	97	0	0	0	0	0	0	0	0	0	0	0	0	0	0	0	0	0	0	0	0.466	0.507	0.531	0.511	1.785	0.492	0.897	0.000	0.000	0.000	0.000	0.000	0.000	0.000	0.000	0.000	0.000	0.000	0.000	0.000	0.000	120	526	10353	9364	-1.102	Error	Error	3291	7062	0	0	3150	6214	0	0	0	0
3	10	6	"ECM4"	"YKR076W"	12810	15400	130	3028	2570	1130	94	110	123	97	94	0	2752	2529	1072	291	320	256	94	88	0	0	0	0	0	0	0	0	0	0	0	0	0	0	0	0	0	0	0	1.192	1.106	1.130	1.103	1.866	1.102	0.819	0.000	0.000	0.000	0.000	0.000	0.000	0.000	0.000	0.000	0.000	0.000	0.000	0.000	0.000	120	577	5395	4714	0.254	Error	Error	2934	2461	0	0	2476	2238	0	0	0	0
3	11	6	"CRR1"	"YLR213C"	12990	15390	110	3632	3050	1393	98	115	135	100	97	0	2585	2315	982	285	311	175	95	91	0	0	0	0	0	0	0	0	0	0	0	0	0	0	0	0	0	0	0	1.537	1.454	1.454	1.618	2.106	1.439	0.896	0.000	0.000	0.000	0.000	0.000	0.000	0.000	0.000	0.000	0.000	0.000	0.000	0.000	0.000	80	496	5834	4982	0.620	Error	Error	3534	2300	0	0	2952	2030	0	0	0	0
3	12	6	""	"YLR243W"	13190	15390	110	299	278	128	99	112	107	73	45	0	747	679	340	282	301	159	76	75	0	0	0	0	0	0	0	0	0	0	0	0	0	0	0	0	0	0	0	0.430	0.451	0.399	0.370	1.928	0.334	0.607	0.000	0.000	0.000	0.000	0.000	0.000	0.000	0.000	0.000	0.000	0.000	0.000	0.000	0.000	80	479	665	576	-1.217	Error	Error	200	465	0	0	179	397	0	0	0	0
3	13	6	"PIG1"	"YLR273C"	13370	15400	120	1621	1986	1374	99	111	85	94	92	0	1840	1936	1373	284	304	137	83	78	0	0	0	0	0	0	0	0	0	0	0	0	0	0	0	0	0	0	0	0.978	1.142	1.142	1.199	2.371	1.047	0.856	0.000	0.000	0.000	0.000	0.000	0.000	0.000	0.000	0.000	0.000	0.000	0.000	0.000	0.000	120	542	3078	3539	-0.032	Error	Error	1522	1556	0	0	1887	1652	0	0	0	0
3	14	6	""	"YLR215C"	13570	15400	120	2246	2217	987	97	115	133	100	97	0	4719	4595	2278	286	308	165	99	97	0	0	0	0	0	0	0	0	0	0	0	0	0	0	0	0	0	0	0	0.485	0.492	0.493	0.516	1.750	0.451	0.882	0.000	0.000	0.000	0.000	0.000	0.000	0.000	0.000	0.000	0.000	0.000	0.000	0.000	0.000	120	556	6582	6429	-1.045	Error	Error	2149	4433	0	0	2120	4309	0	0	0	0
3	15	6	"CDD1"	"YLR245C"	13750	15390	110	885	769	422	96	103	59	87	80	0	1217	1062	569	282	296	113	78	77	0	0	0	0	0	0	0	0	0	0	0	0	0	0	0	0	0	0	0	0.844	0.863	0.819	0.686	1.840	0.788	0.811	0.000	0.000	0.000	0.000	0.000	0.000	0.000	0.000	0.000	0.000	0.000	0.000	0.000	0.000	80	487	1724	1453	-0.245	Error	Error	789	935	0	0	673	780	0	0	0	0
3	16	6	"SMD2"	"YLR275W"	13960	15400	120	1389	1179	601	92	98	49	96	92	0	4721	3984	2059	288	295	107	95	92	0	0	0	0	0	0	0	0	0	0	0	0	0	0	0	0	0	0	0	0.293	0.294	0.299	0.335	2.300	0.278	0.881	0.000	0.000	0.000	0.000	0.000	0.000	0.000	0.000	0.000	0.000	0.000	0.000	0.000	0.000	120	546	5730	4783	-1.773	Error	Error	1297	4433	0	0	1087	3696	0	0	0	0
3	17	6	""	"YLR217W"	14120	15390	110	1382	1190	645	92	116	146	83	78	0	1352	1159	573	292	319	174	78	77	0	0	0	0	0	0	0	0	0	0	0	0	0	0	0	0	0	0	0	1.217	1.266	1.203	1.016	1.996	1.162	0.845	0.000	0.000	0.000	0.000	0.000	0.000	0.000	0.000	0.000	0.000	0.000	0.000	0.000	0.000	80	470	2350	1965	0.283	Error	Error	1290	1060	0	0	1098	867	0	0	0	0
3	18	6	""	"YLR247C"	14330	15390	110	680	681	415	92	110	121	82	75	0	1162	1102	697	287	315	180	78	72	0	0	0	0	0	0	0	0	0	0	0	0	0	0	0	0	0	0	0	0.672	0.723	0.699	0.707	2.278	0.599	0.740	0.000	0.000	0.000	0.000	0.000	0.000	0.000	0.000	0.000	0.000	0.000	0.000	0.000	0.000	80	522	1463	1404	-0.573	Error	Error	588	875	0	0	589	815	0	0	0	0
3	19	6	"YSH1"	"YLR277C"	14530	15400	120	1303	1663	1211	90	97	53	94	93	0	2190	2428	1618	270	291	126	83	82	0	0	0	0	0	0	0	0	0	0	0	0	0	0	0	0	0	0	0	0.632	0.729	0.706	0.730	2.145	0.721	0.874	0.000	0.000	0.000	0.000	0.000	0.000	0.000	0.000	0.000	0.000	0.000	0.000	0.000	0.000	120	556	3133	3731	-0.663	Error	Error	1213	1920	0	0	1573	2158	0	0	0	0
3	20	6	""	"YLR219W"	14720	15400	120	3176	3030	1525	91	96	34	100	99	0	3266	3236	1694	270	282	81	96	95	0	0	0	0	0	0	0	0	0	0	0	0	0	0	0	0	0	0	0	1.030	0.991	1.036	1.132	2.140	0.936	0.875	0.000	0.000	0.000	0.000	0.000	0.000	0.000	0.000	0.000	0.000	0.000	0.000	0.000	0.000	120	522	6081	5905	0.042	Error	Error	3085	2996	0	0	2939	2966	0	0	0	0
3	21	6	"yef3"	"YLR249W"	14910	15400	120	1480	1726	1027	94	95	31	100	100	0	1735	1932	1238	281	288	75	92	90	0	0	0	0	0	0	0	0	0	0	0	0	0	0	0	0	0	0	0	0.953	0.988	1.020	1.135	2.303	0.898	0.845	0.000	0.000	0.000	0.000	0.000	0.000	0.000	0.000	0.000	0.000	0.000	0.000	0.000	0.000	120	555	2840	3283	-0.069	Error	Error	1386	1454	0	0	1632	1651	0	0	0	0
3	22	6	""	"YLR279W"	15110	15400	110	307	284	137	89	92	32	80	78	0	520	467	225	280	282	75	72	66	0	0	0	0	0	0	0	0	0	0	0	0	0	0	0	0	0	0	0	0.908	1.043	0.765	0.649	3.173	0.642	0.537	0.000	0.000	0.000	0.000	0.000	0.000	0.000	0.000	0.000	0.000	0.000	0.000	0.000	0.000	80	536	458	382	-0.139	Error	Error	218	240	0	0	195	187	0	0	0	0
3	1	7	"BUL2"	"YML111W"	11100	15570	110	4156	4182	2156	83	114	252	100	97	0	4802	4792	1847	261	314	375	100	100	0	0	0	0	0	0	0	0	0	0	0	0	0	0	0	0	0	0	0	0.897	0.905	0.898	0.818	1.621	0.934	0.853	0.000	0.000	0.000	0.000	0.000	0.000	0.000	0.000	0.000	0.000	0.000	0.000	0.000	0.000	80	535	8614	8630	-0.157	Error	Error	4073	4541	0	0	4099	4531	0	0	0	0
3	2	7	""	"YMR009W"	11310	15590	120	1644	1426	729	90	117	245	85	81	0	999	930	435	277	325	366	75	48	0	0	0	0	0	0	0	0	0	0	0	0	0	0	0	0	0	0	0	2.152	2.046	2.167	1.939	2.383	2.071	0.733	0.000	0.000	0.000	0.000	0.000	0.000	0.000	0.000	0.000	0.000	0.000	0.000	0.000	0.000	120	564	2276	1989	1.106	Error	Error	1554	722	0	0	1336	653	0	0	0	0
3	3	7	""	"YMR040W"	11500	15590	120	794	759	363	84	88	31	91	91	0	1418	1304	587	275	278	80	89	85	0	0	0	0	0	0	0	0	0	0	0	0	0	0	0	0	0	0	0	0.621	0.656	0.645	0.593	2.033	0.604	0.799	0.000	0.000	0.000	0.000	0.000	0.000	0.000	0.000	0.000	0.000	0.000	0.000	0.000	0.000	120	502	1853	1704	-0.687	Error	Error	710	1143	0	0	675	1029	0	0	0	0
3	4	7	"DAT1"	"YML113W"	11690	15590	120	3074	2678	1286	90	107	203	94	90	0	2634	2363	1064	272	293	238	88	85	0	0	0	0	0	0	0	0	0	0	0	0	0	0	0	0	0	0	0	1.263	1.238	1.249	1.281	2.164	1.278	0.830	0.000	0.000	0.000	0.000	0.000	0.000	0.000	0.000	0.000	0.000	0.000	0.000	0.000	0.000	120	554	5346	4679	0.337	Error	Error	2984	2362	0	0	2588	2091	0	0	0	0
3	5	7	"HXT2"	"YMR011W"	11880	15590	120	4763	4330	2056	92	98	68	99	98	0	5951	5235	2608	275	284	103	97	95	0	0	0	0	0	0	0	0	0	0	0	0	0	0	0	0	0	0	0	0.823	0.854	0.875	0.872	2.171	0.804	0.835	0.000	0.000	0.000	0.000	0.000	0.000	0.000	0.000	0.000	0.000	0.000	0.000	0.000	0.000	120	531	10347	9198	-0.281	Error	Error	4671	5676	0	0	4238	4960	0	0	0	0
3	6	7	"arg80"	"YMR042W"	12070	15590	120	1110	974	491	85	88	33	94	90	0	1046	970	458	267	277	92	85	81	0	0	0	0	0	0	0	0	0	0	0	0	0	0	0	0	0	0	0	1.316	1.265	1.284	1.056	2.143	1.235	0.754	0.000	0.000	0.000	0.000	0.000	0.000	0.000	0.000	0.000	0.000	0.000	0.000	0.000	0.000	120	520	1804	1592	0.396	Error	Error	1025	779	0	0	889	703	0	0	0	0
3	7	7	"van1"	"YML115C"	12260	15590	120	3393	2878	1273	85	92	42	100	99	0	5574	5119	2088	262	281	125	99	98	0	0	0	0	0	0	0	0	0	0	0	0	0	0	0	0	0	0	0	0.623	0.575	0.588	0.559	1.783	0.561	0.872	0.000	0.000	0.000	0.000	0.000	0.000	0.000	0.000	0.000	0.000	0.000	0.000	0.000	0.000	120	551	8620	7650	-0.683	Error	Error	3308	5312	0	0	2793	4857	0	0	0	0
3	8	7	"sec59"	"YMR013C"	12450	15590	120	2496	2422	1147	91	95	33	100	99	0	4862	4860	2414	282	290	87	100	100	0	0	0	0	0	0	0	0	0	0	0	0	0	0	0	0	0	0	0	0.525	0.509	0.531	0.515	1.880	0.469	0.856	0.000	0.000	0.000	0.000	0.000	0.000	0.000	0.000	0.000	0.000	0.000	0.000	0.000	0.000	120	521	6985	6909	-0.929	Error	Error	2405	4580	0	0	2331	4578	0	0	0	0
3	9	7	""	"YMR044W"	12640	15590	120	3174	2790	1303	95	98	36	98	97	0	7711	7130	3395	288	300	90	98	96	0	0	0	0	0	0	0	0	0	0	0	0	0	0	0	0	0	0	0	0.415	0.394	0.412	0.390	2.007	0.360	0.826	0.000	0.000	0.000	0.000	0.000	0.000	0.000	0.000	0.000	0.000	0.000	0.000	0.000	0.000	120	512	10502	9537	-1.270	Error	Error	3079	7423	0	0	2695	6842	0	0	0	0
3	10	7	""	"YML117W"	12840	15590	120	2847	2911	1830	93	97	40	98	98	0	2895	3048	1653	288	298	90	96	95	0	0	0	0	0	0	0	0	0	0	0	0	0	0	0	0	0	0	0	1.056	1.021	1.046	0.956	2.203	1.062	0.818	0.000	0.000	0.000	0.000	0.000	0.000	0.000	0.000	0.000	0.000	0.000	0.000	0.000	0.000	120	538	5361	5578	0.079	Error	Error	2754	2607	0	0	2818	2760	0	0	0	0
3	11	7	"ERG5"	"YMR015C"	13030	15590	120	3371	2899	1393	94	112	133	97	93	0	7614	6829	2973	284	308	158	97	95	0	0	0	0	0	0	0	0	0	0	0	0	0	0	0	0	0	0	0	0.447	0.429	0.446	0.407	1.825	0.413	0.858	0.000	0.000	0.000	0.000	0.000	0.000	0.000	0.000	0.000	0.000	0.000	0.000	0.000	0.000	120	544	10607	9350	-1.161	Error	Error	3277	7330	0	0	2805	6545	0	0	0	0
3	12	7	""	"YMR046C"	13210	15590	120	24790	22424	11712	108	120	63	100	100	0	18200	16824	7892	294	316	132	100	98	0	0	0	0	0	0	0	0	0	0	0	0	0	0	0	0	0	0	0	1.378	1.350	1.359	1.256	1.913	1.382	0.890	0.000	0.000	0.000	0.000	0.000	0.000	0.000	0.000	0.000	0.000	0.000	0.000	0.000	0.000	120	547	42588	38846	0.463	Error	Error	24682	17906	0	0	22316	16530	0	0	0	0
3	13	7	"PBI2"	"YNL015W"	13410	15590	120	341	333	169	105	116	55	81	78	0	745	733	353	289	306	101	85	79	0	0	0	0	0	0	0	0	0	0	0	0	0	0	0	0	0	0	0	0.518	0.514	0.461	0.440	2.296	0.393	0.513	0.000	0.000	0.000	0.000	0.000	0.000	0.000	0.000	0.000	0.000	0.000	0.000	0.000	0.000	120	540	692	672	-0.950	Error	Error	236	456	0	0	228	444	0	0	0	0
3	14	7	""	"YNL047C"	13590	15590	110	2437	2266	1274	88	98	61	95	91	0	4490	4076	2288	277	292	133	93	86	0	0	0	0	0	0	0	0	0	0	0	0	0	0	0	0	0	0	0	0.558	0.573	0.557	0.576	1.788	0.521	0.847	0.000	0.000	0.000	0.000	0.000	0.000	0.000	0.000	0.000	0.000	0.000	0.000	0.000	0.000	80	480	6562	5977	-0.843	Error	Error	2349	4213	0	0	2178	3799	0	0	0	0
3	15	7	""	"YNL078W"	13780	15590	110	2408	2169	1202	85	114	181	85	80	0	1894	1618	918	275	311	217	78	77	0	0	0	0	0	0	0	0	0	0	0	0	0	0	0	0	0	0	0	1.435	1.552	1.494	1.401	1.864	1.474	0.823	0.000	0.000	0.000	0.000	0.000	0.000	0.000	0.000	0.000	0.000	0.000	0.000	0.000	0.000	80	522	3942	3427	0.521	Error	Error	2323	1619	0	0	2084	1343	0	0	0	0
3	16	7	""	"YNL017C"	13970	15590	110	1729	1546	859	90	116	179	82	80	0	2569	2215	1247	279	319	221	78	78	0	0	0	0	0	0	0	0	0	0	0	0	0	0	0	0	0	0	0	0.716	0.752	0.732	0.715	2.151	0.681	0.857	0.000	0.000	0.000	0.000	0.000	0.000	0.000	0.000	0.000	0.000	0.000	0.000	0.000	0.000	80	511	3929	3392	-0.483	Error	Error	1639	2290	0	0	1456	1936	0	0	0	0
3	17	7	"SFB2"	"YNL049C"	14160	15590	110	2892	3075	1984	87	111	164	95	90	0	3510	3384	1926	287	328	241	91	90	0	0	0	0	0	0	0	0	0	0	0	0	0	0	0	0	0	0	0	0.870	0.965	0.946	0.963	1.728	0.948	0.853	0.000	0.000	0.000	0.000	0.000	0.000	0.000	0.000	0.000	0.000	0.000	0.000	0.000	0.000	80	542	6028	6085	-0.200	Error	Error	2805	3223	0	0	2988	3097	0	0	0	0
3	18	7	""	"YNL080C"	14350	15590	110	2355	2000	979	97	140	259	88	81	0	2844	2416	1134	291	360	381	87	78	0	0	0	0	0	0	0	0	0	0	0	0	0	0	0	0	0	0	0	0.884	0.896	0.890	0.854	1.694	0.846	0.878	0.000	0.000	0.000	0.000	0.000	0.000	0.000	0.000	0.000	0.000	0.000	0.000	0.000	0.000	80	549	4811	4028	-0.177	Error	Error	2258	2553	0	0	1903	2125	0	0	0	0
3	19	7	""	"YNL019C"	14550	15590	110	4632	3933	2102	103	135	211	90	87	0	3864	3257	1630	284	340	332	88	85	0	0	0	0	0	0	0	0	0	0	0	0	0	0	0	0	0	0	0	1.265	1.288	1.275	1.284	2.125	1.285	0.894	0.000	0.000	0.000	0.000	0.000	0.000	0.000	0.000	0.000	0.000	0.000	0.000	0.000	0.000	80	522	8109	6803	0.339	Error	Error	4529	3580	0	0	3830	2973	0	0	0	0
3	20	7	""	"YNL051W"	14740	15590	110	2218	1856	924	97	107	80	95	92	0	6628	5904	3069	298	321	202	97	93	0	0	0	0	0	0	0	0	0	0	0	0	0	0	0	0	0	0	0	0.335	0.314	0.330	0.325	1.794	0.295	0.876	0.000	0.000	0.000	0.000	0.000	0.000	0.000	0.000	0.000	0.000	0.000	0.000	0.000	0.000	80	502	8451	7365	-1.577	Error	Error	2121	6330	0	0	1759	5606	0	0	0	0
3	21	7	"pms1"	"YNL082W"	14920	15590	110	2431	2498	1452	91	104	122	98	97	0	6004	6606	3828	291	362	569	93	90	0	0	0	0	0	0	0	0	0	0	0	0	0	0	0	0	0	0	0	0.410	0.381	0.390	0.398	1.599	0.352	0.869	0.000	0.000	0.000	0.000	0.000	0.000	0.000	0.000	0.000	0.000	0.000	0.000	0.000	0.000	80	495	8053	8722	-1.288	Error	Error	2340	5713	0	0	2407	6315	0	0	0	0
3	22	7	"HDA1"	"YNL021W"	15120	15600	120	2547	2363	1184	88	98	105	94	92	0	3328	2845	1577	281	331	486	80	75	0	0	0	0	0	0	0	0	0	0	0	0	0	0	0	0	0	0	0	0.807	0.887	0.847	1.006	2.585	0.810	0.832	0.000	0.000	0.000	0.000	0.000	0.000	0.000	0.000	0.000	0.000	0.000	0.000	0.000	0.000	120	639	5506	4839	-0.309	Error	Error	2459	3047	0	0	2275	2564	0	0	0	0
3	1	8	"MSG5"	"YNL053W"	11130	15780	110	2539	2278	1291	86	96	134	87	83	0	3422	3125	1850	264	283	152	85	82	0	0	0	0	0	0	0	0	0	0	0	0	0	0	0	0	0	0	0	0.777	0.766	0.718	0.702	1.570	0.688	0.880	0.000	0.000	0.000	0.000	0.000	0.000	0.000	0.000	0.000	0.000	0.000	0.000	0.000	0.000	80	552	5611	5053	-0.364	Error	Error	2453	3158	0	0	2192	2861	0	0	0	0
3	2	8	"END3"	"YNL084C"	11310	15780	110	1918	2068	1329	95	114	130	86	81	0	4315	4599	2950	292	355	468	85	80	0	0	0	0	0	0	0	0	0	0	0	0	0	0	0	0	0	0	0	0.453	0.458	0.434	0.426	2.278	0.415	0.872	0.000	0.000	0.000	0.000	0.000	0.000	0.000	0.000	0.000	0.000	0.000	0.000	0.000	0.000	80	489	5846	6280	-1.142	Error	Error	1823	4023	0	0	1973	4307	0	0	0	0
3	3	8	"BIO5"	"YNR056C"	11520	15780	120	2297	2398	1381	95	110	123	95	93	0	3001	2969	1541	284	343	445	89	81	0	0	0	0	0	0	0	0	0	0	0	0	0	0	0	0	0	0	0	0.810	0.858	0.906	0.838	2.143	0.863	0.855	0.000	0.000	0.000	0.000	0.000	0.000	0.000	0.000	0.000	0.000	0.000	0.000	0.000	0.000	120	532	4919	4988	-0.303	Error	Error	2202	2717	0	0	2303	2685	0	0	0	0
3	4	8	"PLB3"	"YOL011W"	11690	15780	110	2437	2423	1314	92	119	228	96	87	0	2432	2506	1235	279	328	345	91	87	0	0	0	0	0	0	0	0	0	0	0	0	0	0	0	0	0	0	0	1.089	1.047	1.039	1.028	1.647	0.998	0.863	0.000	0.000	0.000	0.000	0.000	0.000	0.000	0.000	0.000	0.000	0.000	0.000	0.000	0.000	80	455	4498	4558	0.123	Error	Error	2345	2153	0	0	2331	2227	0	0	0	0
3	5	8	""	"YOL042W"	11900	15780	120	2753	2348	1103	88	110	211	97	88	0	5915	5075	2429	280	319	320	94	90	0	0	0	0	0	0	0	0	0	0	0	0	0	0	0	0	0	0	0	0.473	0.471	0.483	0.483	1.842	0.448	0.872	0.000	0.000	0.000	0.000	0.000	0.000	0.000	0.000	0.000	0.000	0.000	0.000	0.000	0.000	120	532	8300	7055	-1.080	Error	Error	2665	5635	0	0	2260	4795	0	0	0	0
3	6	8	"BIO3"	"YNR058W"	12070	15780	110	2069	1991	1067	81	105	177	95	87	0	2490	2335	1269	276	321	321	85	80	0	0	0	0	0	0	0	0	0	0	0	0	0	0	0	0	0	0	0	0.898	0.928	0.902	0.964	1.770	0.840	0.824	0.000	0.000	0.000	0.000	0.000	0.000	0.000	0.000	0.000	0.000	0.000	0.000	0.000	0.000	80	457	4202	3969	-0.155	Error	Error	1988	2214	0	0	1910	2059	0	0	0	0
3	7	8	"HRD1"	"YOL013C"	12270	15780	110	4475	4057	2142	87	116	200	95	88	0	6687	5978	2906	277	341	417	96	88	0	0	0	0	0	0	0	0	0	0	0	0	0	0	0	0	0	0	0	0.685	0.696	0.692	0.650	1.641	0.666	0.890	0.000	0.000	0.000	0.000	0.000	0.000	0.000	0.000	0.000	0.000	0.000	0.000	0.000	0.000	80	506	10798	9671	-0.547	Error	Error	4388	6410	0	0	3970	5701	0	0	0	0
3	8	8	"PEX15"	"YOL044W"	12460	15780	110	1416	1432	843	91	105	143	86	81	0	3856	3818	2305	286	325	320	85	82	0	0	0	0	0	0	0	0	0	0	0	0	0	0	0	0	0	0	0	0.371	0.380	0.365	0.371	2.142	0.341	0.873	0.000	0.000	0.000	0.000	0.000	0.000	0.000	0.000	0.000	0.000	0.000	0.000	0.000	0.000	80	477	4895	4873	-1.430	Error	Error	1325	3570	0	0	1341	3532	0	0	0	0
3	9	8	"FRE4"	"YNR060W"	12650	15780	120	1837	1825	927	97	101	37	99	97	0	3012	2935	1411	287	304	105	95	94	0	0	0	0	0	0	0	0	0	0	0	0	0	0	0	0	0	0	0	0.639	0.653	0.683	0.645	1.803	0.630	0.829	0.000	0.000	0.000	0.000	0.000	0.000	0.000	0.000	0.000	0.000	0.000	0.000	0.000	0.000	120	522	4465	4376	-0.647	Error	Error	1740	2725	0	0	1728	2648	0	0	0	0
3	10	8	""	"YOL014W"	12830	15780	110	543	482	239	96	100	38	83	81	0	1038	969	514	281	296	95	77	77	0	0	0	0	0	0	0	0	0	0	0	0	0	0	0	0	0	0	0	0.590	0.561	0.511	0.466	2.480	0.464	0.749	0.000	0.000	0.000	0.000	0.000	0.000	0.000	0.000	0.000	0.000	0.000	0.000	0.000	0.000	80	463	1204	1074	-0.760	Error	Error	447	757	0	0	386	688	0	0	0	0
3	11	8	""	"YOL046C"	13020	15780	110	2038	1783	926	95	115	150	86	82	0	2216	1830	962	278	321	243	80	78	0	0	0	0	0	0	0	0	0	0	0	0	0	0	0	0	0	0	0	1.003	1.088	1.077	1.089	1.863	1.012	0.838	0.000	0.000	0.000	0.000	0.000	0.000	0.000	0.000	0.000	0.000	0.000	0.000	0.000	0.000	80	483	3881	3240	0.004	Error	Error	1943	1938	0	0	1688	1552	0	0	0	0
3	12	8	""	"YNR062C"	13200	15780	110	1526	1408	786	102	152	260	82	77	0	1688	1560	844	295	374	351	82	72	0	0	0	0	0	0	0	0	0	0	0	0	0	0	0	0	0	0	0	1.022	1.032	0.995	1.018	1.766	0.935	0.785	0.000	0.000	0.000	0.000	0.000	0.000	0.000	0.000	0.000	0.000	0.000	0.000	0.000	0.000	80	492	2817	2571	0.032	Error	Error	1424	1393	0	0	1306	1265	0	0	0	0
3	13	8	"CMK2"	"YOL016C"	13400	15780	110	1367	1331	859	97	127	199	80	75	0	2518	2328	1528	282	335	274	81	73	0	0	0	0	0	0	0	0	0	0	0	0	0	0	0	0	0	0	0	0.568	0.603	0.584	0.596	2.163	0.541	0.823	0.000	0.000	0.000	0.000	0.000	0.000	0.000	0.000	0.000	0.000	0.000	0.000	0.000	0.000	80	505	3506	3280	-0.816	Error	Error	1270	2236	0	0	1234	2046	0	0	0	0
3	14	8	""	"YOL048C"	13590	15780	110	1417	1172	645	85	91	50	87	85	0	4597	3793	2107	265	288	140	85	81	0	0	0	0	0	0	0	0	0	0	0	0	0	0	0	0	0	0	0	0.307	0.308	0.299	0.331	1.944	0.285	0.856	0.000	0.000	0.000	0.000	0.000	0.000	0.000	0.000	0.000	0.000	0.000	0.000	0.000	0.000	80	494	5664	4615	-1.701	Error	Error	1332	4332	0	0	1087	3528	0	0	0	0
3	15	8	"spr1"	"YOR190W"	13780	15780	120	2739	2289	1121	83	99	156	92	86	0	3799	3268	1626	262	281	153	94	90	0	0	0	0	0	0	0	0	0	0	0	0	0	0	0	0	0	0	0	0.751	0.734	0.741	0.760	2.065	0.692	0.877	0.000	0.000	0.000	0.000	0.000	0.000	0.000	0.000	0.000	0.000	0.000	0.000	0.000	0.000	120	546	6193	5212	-0.413	Error	Error	2656	3537	0	0	2206	3006	0	0	0	0
3	16	8	""	"YOR220W"	13960	15780	110	2426	2017	1017	90	116	153	86	82	0	2881	2515	1273	277	324	299	82	81	0	0	0	0	0	0	0	0	0	0	0	0	0	0	0	0	0	0	0	0.897	0.861	0.843	0.924	2.190	0.823	0.880	0.000	0.000	0.000	0.000	0.000	0.000	0.000	0.000	0.000	0.000	0.000	0.000	0.000	0.000	80	478	4940	4165	-0.157	Error	Error	2336	2604	0	0	1927	2238	0	0	0	0
3	17	8	""	"YOR252W"	14150	15780	110	1638	1294	719	88	133	237	80	75	0	2520	2136	1200	275	363	405	77	72	0	0	0	0	0	0	0	0	0	0	0	0	0	0	0	0	0	0	0	0.690	0.648	0.623	0.594	2.260	0.611	0.850	0.000	0.000	0.000	0.000	0.000	0.000	0.000	0.000	0.000	0.000	0.000	0.000	0.000	0.000	80	480	3795	3067	-0.534	Error	Error	1550	2245	0	0	1206	1861	0	0	0	0
3	18	8	""	"YOR192C"	14340	15780	110	5209	4635	2670	95	149	348	88	85	0	7245	6406	3555	285	400	696	88	80	0	0	0	0	0	0	0	0	0	0	0	0	0	0	0	0	0	0	0	0.735	0.742	0.735	0.712	1.648	0.718	0.899	0.000	0.000	0.000	0.000	0.000	0.000	0.000	0.000	0.000	0.000	0.000	0.000	0.000	0.000	80	480	12074	10661	-0.445	Error	Error	5114	6960	0	0	4540	6121	0	0	0	0
3	19	8	""	"YOR222W"	14530	15780	110	2385	1917	1036	96	131	295	81	80	0	2679	2180	1099	290	380	650	76	70	0	0	0	0	0	0	0	0	0	0	0	0	0	0	0	0	0	0	0	0.958	0.963	0.968	0.937	1.912	0.921	0.860	0.000	0.000	0.000	0.000	0.000	0.000	0.000	0.000	0.000	0.000	0.000	0.000	0.000	0.000	80	468	4678	3711	-0.062	Error	Error	2289	2389	0	0	1821	1890	0	0	0	0
3	20	8	"SEC63"	"YOR254C"	14710	15780	110	782	771	468	89	111	128	81	78	0	1270	1205	779	287	339	282	75	72	0	0	0	0	0	0	0	0	0	0	0	0	0	0	0	0	0	0	0	0.705	0.743	0.686	0.642	2.273	0.641	0.811	0.000	0.000	0.000	0.000	0.000	0.000	0.000	0.000	0.000	0.000	0.000	0.000	0.000	0.000	80	480	1676	1600	-0.504	Error	Error	693	983	0	0	682	918	0	0	0	0
3	21	8	""	"YOR192C-B"	14910	15780	110	3575	3404	2084	87	113	169	88	82	0	4919	4620	2874	272	347	544	80	75	0	0	0	0	0	0	0	0	0	0	0	0	0	0	0	0	0	0	0	0.751	0.763	0.787	0.840	1.885	0.698	0.867	0.000	0.000	0.000	0.000	0.000	0.000	0.000	0.000	0.000	0.000	0.000	0.000	0.000	0.000	80	490	8135	7665	-0.414	Error	Error	3488	4647	0	0	3317	4348	0	0	0	0
3	22	8	"rpb8"	"YOR224C"	15100	15780	110	1518	1241	688	91	111	141	81	78	0	1918	1583	896	280	325	336	75	72	0	0	0	0	0	0	0	0	0	0	0	0	0	0	0	0	0	0	0	0.871	0.883	0.855	0.815	2.126	0.817	0.857	0.000	0.000	0.000	0.000	0.000	0.000	0.000	0.000	0.000	0.000	0.000	0.000	0.000	0.000	80	482	3065	2453	-0.199	Error	Error	1427	1638	0	0	1150	1303	0	0	0	0
3	1	9	""	"YOR256C"	11120	15970	120	3276	3301	1778	81	87	43	100	99	0	3370	3302	1766	257	266	85	95	92	0	0	0	0	0	0	0	0	0	0	0	0	0	0	0	0	0	0	0	1.026	1.057	1.034	1.102	2.319	1.027	0.809	0.000	0.000	0.000	0.000	0.000	0.000	0.000	0.000	0.000	0.000	0.000	0.000	0.000	0.000	120	541	6308	6265	0.038	Error	Error	3195	3113	0	0	3220	3045	0	0	0	0
3	2	9	"TOA1"	"YOR194C"	11300	15970	120	2683	2201	1109	96	109	118	92	88	0	2170	1890	951	289	316	306	82	77	0	0	0	0	0	0	0	0	0	0	0	0	0	0	0	0	0	0	0	1.375	1.315	1.300	1.317	1.903	1.256	0.860	0.000	0.000	0.000	0.000	0.000	0.000	0.000	0.000	0.000	0.000	0.000	0.000	0.000	0.000	120	461	4468	3706	0.460	Error	Error	2587	1881	0	0	2105	1601	0	0	0	0
3	3	9	"ISU2"	"YOR226C"	11490	15970	120	1187	1016	554	90	95	35	89	87	0	1039	948	502	284	296	86	80	77	0	0	0	0	0	0	0	0	0	0	0	0	0	0	0	0	0	0	0	1.453	1.395	1.357	1.295	2.342	1.284	0.780	0.000	0.000	0.000	0.000	0.000	0.000	0.000	0.000	0.000	0.000	0.000	0.000	0.000	0.000	120	459	1852	1590	0.539	Error	Error	1097	755	0	0	926	664	0	0	0	0
3	4	9	""	"YOR258W"	11680	15970	120	1073	964	513	85	108	217	80	76	0	1822	1639	896	269	302	293	80	75	0	0	0	0	0	0	0	0	0	0	0	0	0	0	0	0	0	0	0	0.636	0.642	0.626	0.588	1.965	0.581	0.794	0.000	0.000	0.000	0.000	0.000	0.000	0.000	0.000	0.000	0.000	0.000	0.000	0.000	0.000	120	470	2541	2249	-0.652	Error	Error	988	1553	0	0	879	1370	0	0	0	0
3	5	9	"MRPL40"	"YPL173W"	11870	15970	120	3101	2617	1185	88	92	30	100	99	0	3905	3340	1683	274	281	76	95	95	0	0	0	0	0	0	0	0	0	0	0	0	0	0	0	0	0	0	0	0.830	0.825	0.837	0.916	1.907	0.777	0.832	0.000	0.000	0.000	0.000	0.000	0.000	0.000	0.000	0.000	0.000	0.000	0.000	0.000	0.000	120	459	6644	5595	-0.269	Error	Error	3013	3631	0	0	2529	3066	0	0	0	0
3	6	9	"HRR25"	"YPL204W"	12060	15970	120	247	243	90	86	100	150	55	3	0	513	484	205	276	295	206	55	11	0	0	0	0	0	0	0	0	0	0	0	0	0	0	0	0	0	0	0	0.679	0.755	0.616	0.671	2.366	0.383	0.390	0.000	0.000	0.000	0.000	0.000	0.000	0.000	0.000	0.000	0.000	0.000	0.000	0.000	0.000	120	458	398	365	-0.558	Error	Error	161	237	0	0	157	208	0	0	0	0
3	7	9	""	"YPL236C"	12240	15970	120	2139	1876	1011	85	95	131	92	85	0	3060	2718	1571	270	294	279	81	79	0	0	0	0	0	0	0	0	0	0	0	0	0	0	0	0	0	0	0	0.736	0.732	0.752	0.833	2.321	0.655	0.836	0.000	0.000	0.000	0.000	0.000	0.000	0.000	0.000	0.000	0.000	0.000	0.000	0.000	0.000	120	535	4844	4239	-0.442	Error	Error	2054	2790	0	0	1791	2448	0	0	0	0
3	8	9	"spt14"	"YPL175W"	12440	15970	120	3563	2853	1389	93	98	36	99	97	0	7459	6404	2981	282	295	100	100	99	0	0	0	0	0	0	0	0	0	0	0	0	0	0	0	0	0	0	0	0.483	0.451	0.471	0.426	1.732	0.442	0.883	0.000	0.000	0.000	0.000	0.000	0.000	0.000	0.000	0.000	0.000	0.000	0.000	0.000	0.000	120	541	10647	8882	-1.048	Error	Error	3470	7177	0	0	2760	6122	0	0	0	0
3	9	9	""	"YPL206C"	12620	15970	120	3002	2655	1233	104	110	41	98	97	0	3097	2727	1234	306	317	104	95	93	0	0	0	0	0	0	0	0	0	0	0	0	0	0	0	0	0	0	0	1.038	1.054	1.071	1.060	1.983	1.028	0.851	0.000	0.000	0.000	0.000	0.000	0.000	0.000	0.000	0.000	0.000	0.000	0.000	0.000	0.000	120	509	5689	4972	0.054	Error	Error	2898	2791	0	0	2551	2421	0	0	0	0
3	10	9	""	"YPL238C"	12810	15970	120	826	731	349	96	99	40	89	84	0	1127	995	487	281	294	98	83	79	0	0	0	0	0	0	0	0	0	0	0	0	0	0	0	0	0	0	0	0.863	0.889	0.846	0.788	2.251	0.805	0.759	0.000	0.000	0.000	0.000	0.000	0.000	0.000	0.000	0.000	0.000	0.000	0.000	0.000	0.000	120	537	1576	1349	-0.213	Error	Error	730	846	0	0	635	714	0	0	0	0
3	11	9	"CUP9"	"YPL177C"	13000	15970	120	1627	1434	700	99	112	132	91	87	0	4077	3862	1902	283	306	183	97	92	0	0	0	0	0	0	0	0	0	0	0	0	0	0	0	0	0	0	0	0.403	0.373	0.372	0.378	1.989	0.356	0.868	0.000	0.000	0.000	0.000	0.000	0.000	0.000	0.000	0.000	0.000	0.000	0.000	0.000	0.000	120	544	5322	4914	-1.312	Error	Error	1528	3794	0	0	1335	3579	0	0	0	0
3	12	9	""	"YPL208W"	13190	15970	120	2852	2571	1200	102	121	149	97	96	0	2392	2183	930	293	315	159	96	94	0	0	0	0	0	0	0	0	0	0	0	0	0	0	0	0	0	0	0	1.310	1.306	1.330	1.333	1.782	1.357	0.817	0.000	0.000	0.000	0.000	0.000	0.000	0.000	0.000	0.000	0.000	0.000	0.000	0.000	0.000	120	545	4849	4359	0.390	Error	Error	2750	2099	0	0	2469	1890	0	0	0	0
3	13	9	"hsp82"	"YPL240C"	13380	15970	120	2063	2104	1056	95	99	40	98	98	0	2983	3032	1387	279	294	103	97	97	0	0	0	0	0	0	0	0	0	0	0	0	0	0	0	0	0	0	0	0.728	0.730	0.746	0.731	1.703	0.699	0.836	0.000	0.000	0.000	0.000	0.000	0.000	0.000	0.000	0.000	0.000	0.000	0.000	0.000	0.000	120	565	4672	4762	-0.458	Error	Error	1968	2704	0	0	2009	2753	0	0	0	0
3	14	9	"PPQ1"	"YPL179W"	13570	15970	120	4789	4024	1842	88	92	40	100	100	0	4738	4131	1576	271	281	98	100	99	0	0	0	0	0	0	0	0	0	0	0	0	0	0	0	0	0	0	0	1.052	1.020	1.046	0.942	1.538	1.073	0.880	0.000	0.000	0.000	0.000	0.000	0.000	0.000	0.000	0.000	0.000	0.000	0.000	0.000	0.000	120	558	9168	7796	0.074	Error	Error	4701	4467	0	0	3936	3860	0	0	0	0
3	15	9	"SRP72"	"YPL210C"	13770	15970	120	1552	1532	881	88	90	35	95	91	0	2065	2057	1129	266	274	81	87	85	0	0	0	0	0	0	0	0	0	0	0	0	0	0	0	0	0	0	0	0.814	0.806	0.824	0.823	1.976	0.787	0.817	0.000	0.000	0.000	0.000	0.000	0.000	0.000	0.000	0.000	0.000	0.000	0.000	0.000	0.000	120	535	3263	3235	-0.297	Error	Error	1464	1799	0	0	1444	1791	0	0	0	0
3	16	9	"IQG1"	"YPL242C"	13960	15970	120	474	505	279	87	101	130	85	72	0	999	1032	592	269	294	206	83	72	0	0	0	0	0	0	0	0	0	0	0	0	0	0	0	0	0	0	0	0.530	0.548	0.549	0.544	1.855	0.463	0.705	0.000	0.000	0.000	0.000	0.000	0.000	0.000	0.000	0.000	0.000	0.000	0.000	0.000	0.000	120	524	1117	1181	-0.916	Error	Error	387	730	0	0	418	763	0	0	0	0
3	17	9	"EMPTY"	"EMPTY"	14150	15960	150	105	154	133	84	111	171	14	5	0	311	409	363	277	330	332	9	6	0	0	0	0	0	0	0	0	0	0	0	0	0	0	0	0	0	0	0	0.618	0.530	0.575	0.575	4.069	0.413	0.636	0.000	0.000	0.000	0.000	0.000	0.000	0.000	0.000	0.000	0.000	0.000	0.000	0.000	0.000	156	651	55	202	-0.695	Error	Error	21	34	0	0	70	132	0	0	-75	0
3	18	9	"EMPTY"	"EMPTY"	14340	15960	150	94	136	129	85	120	280	7	0	0	293	368	282	281	360	608	8	0	0	0	0	0	0	0	0	0	0	0	0	0	0	0	0	0	0	0	0	0.750	0.586	0.476	0.519	3.677	0.504	0.891	0.000	0.000	0.000	0.000	0.000	0.000	0.000	0.000	0.000	0.000	0.000	0.000	0.000	0.000	156	583	21	138	-0.415	Error	Error	9	12	0	0	51	87	0	0	-75	0
3	19	9	"EMPTY"	"EMPTY"	14530	15960	150	120	197	187	89	119	273	16	3	0	312	480	443	285	358	603	14	5	0	0	0	0	0	0	0	0	0	0	0	0	0	0	0	0	0	0	0	1.148	0.554	0.369	0.467	3.693	0.399	0.670	0.000	0.000	0.000	0.000	0.000	0.000	0.000	0.000	0.000	0.000	0.000	0.000	0.000	0.000	156	546	58	303	0.199	Error	Error	31	27	0	0	108	195	0	0	-75	0
3	20	9	"EMPTY"	"EMPTY"	14720	15960	150	119	150	100	84	100	110	23	11	0	284	369	267	274	312	240	14	8	0	0	0	0	0	0	0	0	0	0	0	0	0	0	0	0	0	0	0	3.500	0.695	0.463	0.580	3.734	0.308	0.446	0.000	0.000	0.000	0.000	0.000	0.000	0.000	0.000	0.000	0.000	0.000	0.000	0.000	0.000	156	630	45	161	1.807	Error	Error	35	10	0	0	66	95	0	0	-75	0
3	21	9	"EMPTY"	"EMPTY"	14910	15960	150	97	139	109	83	97	113	21	10	0	299	382	276	272	304	291	11	6	0	0	0	0	0	0	0	0	0	0	0	0	0	0	0	0	0	0	0	0.519	0.509	0.373	0.404	3.911	0.308	0.639	0.000	0.000	0.000	0.000	0.000	0.000	0.000	0.000	0.000	0.000	0.000	0.000	0.000	0.000	156	646	41	166	-0.948	Error	Error	14	27	0	0	56	110	0	0	-75	0
3	22	9	"EMPTY"	"EMPTY"	15100	15960	150	101	143	124	86	98	111	17	7	0	297	362	263	276	305	264	12	5	0	0	0	0	0	0	0	0	0	0	0	0	0	0	0	0	0	0	0	0.714	0.663	0.390	0.462	3.278	0.448	0.538	0.000	0.000	0.000	0.000	0.000	0.000	0.000	0.000	0.000	0.000	0.000	0.000	0.000	0.000	156	817	36	143	-0.485	Error	Error	15	21	0	0	57	86	0	0	-75	0
3	1	10	"EMPTY"	"EMPTY"	11110	16150	150	106	130	94	71	75	28	53	33	0	271	315	189	251	259	73	30	22	0	0	0	0	0	0	0	0	0	0	0	0	0	0	0	0	0	0	0	1.750	0.922	0.467	0.522	4.068	0.252	0.159	0.000	0.000	0.000	0.000	0.000	0.000	0.000	0.000	0.000	0.000	0.000	0.000	0.000	0.000	156	803	55	123	0.807	Error	Error	35	20	0	0	59	64	0	0	-75	0
3	2	10	"EMPTY"	"EMPTY"	11300	16150	150	104	145	118	87	90	32	41	28	0	305	359	205	272	282	88	35	18	0	0	0	0	0	0	0	0	0	0	0	0	0	0	0	0	0	0	0	0.515	0.667	0.464	0.519	4.114	0.334	0.244	0.000	0.000	0.000	0.000	0.000	0.000	0.000	0.000	0.000	0.000	0.000	0.000	0.000	0.000	156	563	50	145	-0.957	Error	Error	17	33	0	0	58	87	0	0	-75	0
3	3	10	"EMPTY"	"EMPTY"	11490	16150	150	109	136	92	88	91	32	40	25	0	298	368	286	285	293	89	24	15	0	0	0	0	0	0	0	0	0	0	0	0	0	0	0	0	0	0	0	1.615	0.578	0.484	0.491	4.444	0.155	0.153	0.000	0.000	0.000	0.000	0.000	0.000	0.000	0.000	0.000	0.000	0.000	0.000	0.000	0.000	156	564	34	131	0.692	Error	Error	21	13	0	0	48	83	0	0	-75	0
3	4	10	"EMPTY"	"EMPTY"	11680	16150	150	119	151	105	87	92	34	47	28	0	310	403	283	282	293	85	35	21	0	0	0	0	0	0	0	0	0	0	0	0	0	0	0	0	0	0	0	1.143	0.529	0.449	0.405	3.188	0.238	0.302	0.000	0.000	0.000	0.000	0.000	0.000	0.000	0.000	0.000	0.000	0.000	0.000	0.000	0.000	156	570	60	185	0.193	Error	Error	32	28	0	0	64	121	0	0	-75	0
3	5	10	"EMPTY"	"EMPTY"	11870	16150	150	102	139	111	87	91	33	38	26	0	287	368	292	278	287	85	27	14	0	0	0	0	0	0	0	0	0	0	0	0	0	0	0	0	0	0	0	1.667	0.578	0.421	0.470	4.236	0.219	0.242	0.000	0.000	0.000	0.000	0.000	0.000	0.000	0.000	0.000	0.000	0.000	0.000	0.000	0.000	156	575	24	142	0.737	Error	Error	15	9	0	0	52	90	0	0	-75	0
3	6	10	"EMPTY"	"EMPTY"	12060	16150	150	98	131	100	86	88	29	39	27	0	304	390	306	274	284	84	35	20	0	0	0	0	0	0	0	0	0	0	0	0	0	0	0	0	0	0	0	0.400	0.388	0.412	0.455	4.857	0.172	0.222	0.000	0.000	0.000	0.000	0.000	0.000	0.000	0.000	0.000	0.000	0.000	0.000	0.000	0.000	156	627	42	161	-1.322	Error	Error	12	30	0	0	45	116	0	0	-75	0
3	7	10	""	"iYBL030C-0"	12260	16160	110	2002	1941	1182	87	99	77	100	96	0	1495	1584	782	286	301	137	96	88	0	0	0	0	0	0	0	0	0	0	0	0	0	0	0	0	0	0	0	1.584	1.428	1.363	1.389	1.742	1.389	0.831	0.000	0.000	0.000	0.000	0.000	0.000	0.000	0.000	0.000	0.000	0.000	0.000	0.000	0.000	80	495	3124	3152	0.664	Error	Error	1915	1209	0	0	1854	1298	0	0	0	0
3	8	10	""	"iYBL027W"	12450	16160	110	2554	2233	1159	99	114	87	93	92	0	4169	3758	1891	296	325	165	97	95	0	0	0	0	0	0	0	0	0	0	0	0	0	0	0	0	0	0	0	0.634	0.616	0.615	0.574	1.827	0.585	0.881	0.000	0.000	0.000	0.000	0.000	0.000	0.000	0.000	0.000	0.000	0.000	0.000	0.000	0.000	80	511	6328	5596	-0.658	Error	Error	2455	3873	0	0	2134	3462	0	0	0	0
3	9	10	""	"iYBL023C"	12640	16160	110	927	795	429	102	109	57	83	80	0	1377	1206	695	304	320	133	76	73	0	0	0	0	0	0	0	0	0	0	0	0	0	0	0	0	0	0	0	0.769	0.768	0.693	0.645	1.947	0.683	0.799	0.000	0.000	0.000	0.000	0.000	0.000	0.000	0.000	0.000	0.000	0.000	0.000	0.000	0.000	80	509	1898	1595	-0.379	Error	Error	825	1073	0	0	693	902	0	0	0	0
3	10	10	""	"iYBL009W"	12830	16160	110	1126	969	398	80	93	79	97	92	0	1909	1785	671	275	306	198	95	91	0	0	0	0	0	0	0	0	0	0	0	0	0	0	0	0	0	0	0	0.640	0.589	0.590	0.594	1.751	0.554	0.834	0.000	0.000	0.000	0.000	0.000	0.000	0.000	0.000	0.000	0.000	0.000	0.000	0.000	0.000	80	512	2680	2399	-0.644	Error	Error	1046	1634	0	0	889	1510	0	0	0	0
3	11	10	""	"iYBL005W"	13020	16160	110	1314	1211	752	91	103	79	91	82	0	1560	1508	890	277	309	196	78	77	0	0	0	0	0	0	0	0	0	0	0	0	0	0	0	0	0	0	0	0.953	0.910	0.899	0.891	1.856	0.878	0.819	0.000	0.000	0.000	0.000	0.000	0.000	0.000	0.000	0.000	0.000	0.000	0.000	0.000	0.000	80	522	2506	2351	-0.069	Error	Error	1223	1283	0	0	1120	1231	0	0	0	0
3	12	10	""	"iYBL003C"	13220	16160	110	862	796	492	95	100	37	83	83	0	2028	1809	1137	288	299	93	82	81	0	0	0	0	0	0	0	0	0	0	0	0	0	0	0	0	0	0	0	0.441	0.461	0.442	0.445	2.315	0.412	0.820	0.000	0.000	0.000	0.000	0.000	0.000	0.000	0.000	0.000	0.000	0.000	0.000	0.000	0.000	80	549	2507	2222	-1.182	Error	Error	767	1740	0	0	701	1521	0	0	0	0
3	13	10	""	"iYBRCdelta11"	13430	16160	90	125	126	53	89	95	37	50	28	0	497	455	236	279	286	90	67	57	0	0	0	0	0	0	0	0	0	0	0	0	0	0	0	0	0	0	0	0.165	0.210	0.261	0.235	2.552	0.114	0.173	0.000	0.000	0.000	0.000	0.000	0.000	0.000	0.000	0.000	0.000	0.000	0.000	0.000	0.000	52	385	254	213	-2.598	Error	Error	36	218	0	0	37	176	0	0	0	0
3	14	10	""	"iYBR014C"	13600	16160	110	971	898	549	84	87	33	87	86	0	2023	1971	1221	267	274	79	87	83	0	0	0	0	0	0	0	0	0	0	0	0	0	0	0	0	0	0	0	0.505	0.478	0.470	0.530	3.003	0.422	0.772	0.000	0.000	0.000	0.000	0.000	0.000	0.000	0.000	0.000	0.000	0.000	0.000	0.000	0.000	80	489	2643	2518	-0.985	Error	Error	887	1756	0	0	814	1704	0	0	0	0
3	15	10	""	"iYBR018C"	13780	16160	110	1583	1461	911	86	101	114	85	81	0	1642	1448	866	269	294	173	78	75	0	0	0	0	0	0	0	0	0	0	0	0	0	0	0	0	0	0	0	1.090	1.166	1.076	1.018	2.051	1.091	0.848	0.000	0.000	0.000	0.000	0.000	0.000	0.000	0.000	0.000	0.000	0.000	0.000	0.000	0.000	80	509	2870	2554	0.125	Error	Error	1497	1373	0	0	1375	1179	0	0	0	0
3	16	10	""	"iYBR035C"	13980	16160	110	1601	1388	816	86	100	100	88	85	0	1684	1463	752	272	297	165	81	80	0	0	0	0	0	0	0	0	0	0	0	0	0	0	0	0	0	0	0	1.073	1.093	1.079	0.916	2.096	1.086	0.829	0.000	0.000	0.000	0.000	0.000	0.000	0.000	0.000	0.000	0.000	0.000	0.000	0.000	0.000	80	501	2927	2493	0.102	Error	Error	1515	1412	0	0	1302	1191	0	0	0	0
3	17	10	""	"iYBR038W"	14170	16170	120	1429	1245	745	85	89	33	95	92	0	2192	1936	1060	279	287	93	85	82	0	0	0	0	0	0	0	0	0	0	0	0	0	0	0	0	0	0	0	0.703	0.700	0.708	0.736	2.301	0.676	0.817	0.000	0.000	0.000	0.000	0.000	0.000	0.000	0.000	0.000	0.000	0.000	0.000	0.000	0.000	120	570	3257	2817	-0.509	Error	Error	1344	1913	0	0	1160	1657	0	0	0	0
3	18	10	""	"iYBR042C"	14370	16170	120	410	427	239	88	91	32	89	85	0	1096	1066	542	283	290	81	85	82	0	0	0	0	0	0	0	0	0	0	0	0	0	0	0	0	0	0	0	0.396	0.433	0.426	0.374	1.964	0.401	0.788	0.000	0.000	0.000	0.000	0.000	0.000	0.000	0.000	0.000	0.000	0.000	0.000	0.000	0.000	120	484	1135	1122	-1.336	Error	Error	322	813	0	0	339	783	0	0	0	0
3	19	10	""	"iYCR018C"	14530	16150	150	111	117	49	87	93	70	22	1	0	327	343	145	276	391	1840	0	0	0	0	0	0	0	0	0	0	0	0	0	0	0	0	0	0	0	0	0	0.471	0.448	0.311	0.336	3.719	0.137	0.104	0.000	0.000	0.000	0.000	0.000	0.000	0.000	0.000	0.000	0.000	0.000	0.000	0.000	0.000	156	651	75	97	-1.087	Error	Error	24	51	0	0	30	67	0	0	-50	0
3	20	10	""	"iYCRCtau1"	14740	16170	110	284	292	192	83	89	76	78	66	0	605	621	417	271	410	2054	1	0	0	0	0	0	0	0	0	0	0	0	0	0	0	0	0	0	0	0	0	0.602	0.597	0.460	0.443	2.348	0.023	0.123	0.000	0.000	0.000	0.000	0.000	0.000	0.000	0.000	0.000	0.000	0.000	0.000	0.000	0.000	80	522	535	559	-0.733	Error	Error	201	334	0	0	209	350	0	0	0	0
3	21	10	""	"iYCR020C"	14930	16160	110	465	407	214	81	84	28	87	83	0	1329	1173	593	283	289	80	83	81	0	0	0	0	0	0	0	0	0	0	0	0	0	0	0	0	0	0	0	0.367	0.366	0.366	0.312	2.276	0.341	0.803	0.000	0.000	0.000	0.000	0.000	0.000	0.000	0.000	0.000	0.000	0.000	0.000	0.000	0.000	80	464	1430	1216	-1.446	Error	Error	384	1046	0	0	326	890	0	0	0	0
3	22	10	""	"iSNR65"	15120	16170	120	591	517	299	86	89	31	89	86	0	851	784	398	279	287	95	78	75	0	0	0	0	0	0	0	0	0	0	0	0	0	0	0	0	0	0	0	0.883	0.853	0.828	0.648	2.443	0.747	0.662	0.000	0.000	0.000	0.000	0.000	0.000	0.000	0.000	0.000	0.000	0.000	0.000	0.000	0.000	120	606	1077	936	-0.180	Error	Error	505	572	0	0	431	505	0	0	0	0
3	1	11	""	"iYCR033W"	11130	16350	110	729	733	424	75	77	28	90	86	0	1680	1644	1000	252	258	77	82	82	0	0	0	0	0	0	0	0	0	0	0	0	0	0	0	0	0	0	0	0.458	0.473	0.468	0.427	1.743	0.418	0.844	0.000	0.000	0.000	0.000	0.000	0.000	0.000	0.000	0.000	0.000	0.000	0.000	0.000	0.000	80	544	2082	2050	-1.127	Error	Error	654	1428	0	0	658	1392	0	0	0	0
3	2	11	""	"iYCR037C"	11320	16350	110	2188	1885	1056	82	86	31	93	91	0	2537	2258	1177	271	277	88	83	83	0	0	0	0	0	0	0	0	0	0	0	0	0	0	0	0	0	0	0	0.929	0.907	0.911	0.849	1.701	0.874	0.885	0.000	0.000	0.000	0.000	0.000	0.000	0.000	0.000	0.000	0.000	0.000	0.000	0.000	0.000	80	506	4372	3790	-0.106	Error	Error	2106	2266	0	0	1803	1987	0	0	0	0
3	3	11	""	"iYCR060W"	11510	16360	120	1507	1561	1009	85	88	37	98	96	0	1039	1043	554	276	288	105	84	80	0	0	0	0	0	0	0	0	0	0	0	0	0	0	0	0	0	0	0	1.864	1.924	1.943	1.755	2.168	1.944	0.818	0.000	0.000	0.000	0.000	0.000	0.000	0.000	0.000	0.000	0.000	0.000	0.000	0.000	0.000	120	568	2185	2243	0.898	Error	Error	1422	763	0	0	1476	767	0	0	0	0
3	4	11	""	"iYCR066W"	11700	16350	110	604	550	279	86	89	31	90	85	0	2534	2368	1312	277	287	99	86	85	0	0	0	0	0	0	0	0	0	0	0	0	0	0	0	0	0	0	0	0.230	0.222	0.217	0.238	2.412	0.191	0.788	0.000	0.000	0.000	0.000	0.000	0.000	0.000	0.000	0.000	0.000	0.000	0.000	0.000	0.000	80	495	2775	2555	-2.123	Error	Error	518	2257	0	0	464	2091	0	0	0	0
3	5	11	""	"iYCR071C"	11890	16350	110	959	847	398	85	90	35	95	91	0	2611	2398	1138	279	292	108	90	86	0	0	0	0	0	0	0	0	0	0	0	0	0	0	0	0	0	0	0	0.375	0.360	0.362	0.363	1.642	0.327	0.857	0.000	0.000	0.000	0.000	0.000	0.000	0.000	0.000	0.000	0.000	0.000	0.000	0.000	0.000	80	508	3206	2881	-1.416	Error	Error	874	2332	0	0	762	2119	0	0	0	0
3	6	11	""	"iYCR090C-1"	12090	16360	120	2884	2470	1198	85	90	33	100	100	0	2987	2652	1160	276	288	103	98	98	0	0	0	0	0	0	0	0	0	0	0	0	0	0	0	0	0	0	0	1.032	1.004	1.015	0.950	1.669	0.988	0.869	0.000	0.000	0.000	0.000	0.000	0.000	0.000	0.000	0.000	0.000	0.000	0.000	0.000	0.000	120	572	5510	4761	0.046	Error	Error	2799	2711	0	0	2385	2376	0	0	0	0
3	7	11	""	"iYCR094W"	12280	16350	110	543	509	276	94	101	61	82	77	0	1219	1201	626	287	295	97	83	83	0	0	0	0	0	0	0	0	0	0	0	0	0	0	0	0	0	0	0	0.482	0.454	0.451	0.420	1.978	0.408	0.800	0.000	0.000	0.000	0.000	0.000	0.000	0.000	0.000	0.000	0.000	0.000	0.000	0.000	0.000	80	496	1381	1329	-1.054	Error	Error	449	932	0	0	415	914	0	0	0	0
3	8	11	""	"iYCRWomega3"	12460	16350	110	1678	1817	1282	99	124	182	83	82	0	2982	3197	2159	293	351	390	83	78	0	0	0	0	0	0	0	0	0	0	0	0	0	0	0	0	0	0	0	0.587	0.592	0.591	0.552	1.598	0.554	0.855	0.000	0.000	0.000	0.000	0.000	0.000	0.000	0.000	0.000	0.000	0.000	0.000	0.000	0.000	80	514	4268	4622	-0.768	Error	Error	1579	2689	0	0	1718	2904	0	0	0	0
3	9	11	""	"iYDR036C"	12660	16360	120	1569	1371	714	95	118	170	88	81	0	1985	1761	919	290	342	360	77	74	0	0	0	0	0	0	0	0	0	0	0	0	0	0	0	0	0	0	0	0.870	0.867	0.831	0.885	2.225	0.804	0.806	0.000	0.000	0.000	0.000	0.000	0.000	0.000	0.000	0.000	0.000	0.000	0.000	0.000	0.000	120	586	3169	2747	-0.202	Error	Error	1474	1695	0	0	1276	1471	0	0	0	0
3	10	11	""	"iYDR040C"	12840	16350	110	963	1116	1231	90	104	113	85	78	0	1492	1618	1380	276	309	213	78	77	0	0	0	0	0	0	0	0	0	0	0	0	0	0	0	0	0	0	0	0.718	0.765	0.675	0.650	1.628	0.800	0.727	0.000	0.000	0.000	0.000	0.000	0.000	0.000	0.000	0.000	0.000	0.000	0.000	0.000	0.000	80	497	2089	2368	-0.478	Error	Error	873	1216	0	0	1026	1342	0	0	0	0
3	11	11	""	"iYDR043C-0"	13030	16350	110	555	672	479	94	109	101	87	77	0	882	881	527	279	314	190	73	62	0	0	0	0	0	0	0	0	0	0	0	0	0	0	0	0	0	0	0	0.765	0.960	0.935	0.886	1.895	0.892	0.754	0.000	0.000	0.000	0.000	0.000	0.000	0.000	0.000	0.000	0.000	0.000	0.000	0.000	0.000	80	540	1064	1180	-0.387	Error	Error	461	603	0	0	578	602	0	0	0	0
3	12	11	""	"itD(GUC)D"	13230	16350	110	387	358	183	92	99	47	85	77	0	943	837	405	287	305	111	78	76	0	0	0	0	0	0	0	0	0	0	0	0	0	0	0	0	0	0	0	0.450	0.484	0.455	0.423	2.262	0.428	0.686	0.000	0.000	0.000	0.000	0.000	0.000	0.000	0.000	0.000	0.000	0.000	0.000	0.000	0.000	80	530	951	816	-1.153	Error	Error	295	656	0	0	266	550	0	0	0	0
3	13	11	""	"iYDR062W"	13410	16350	110	969	890	571	91	96	47	87	85	0	1595	1490	874	277	298	133	80	75	0	0	0	0	0	0	0	0	0	0	0	0	0	0	0	0	0	0	0	0.666	0.659	0.668	0.671	2.205	0.623	0.852	0.000	0.000	0.000	0.000	0.000	0.000	0.000	0.000	0.000	0.000	0.000	0.000	0.000	0.000	80	531	2196	2012	-0.586	Error	Error	878	1318	0	0	799	1213	0	0	0	0
3	14	11	""	"iYDR066C"	13600	16350	100	374	501	369	87	92	45	81	76	0	1474	1774	1360	263	285	124	73	73	0	0	0	0	0	0	0	0	0	0	0	0	0	0	0	0	0	0	0	0.237	0.274	0.274	0.290	2.128	0.246	0.848	0.000	0.000	0.000	0.000	0.000	0.000	0.000	0.000	0.000	0.000	0.000	0.000	0.000	0.000	80	474	1498	1925	-2.077	Error	Error	287	1211	0	0	414	1511	0	0	0	0
3	15	11	""	"iYDR082W"	13790	16350	110	248	224	103	82	93	90	67	45	0	612	550	277	271	285	141	70	60	0	0	0	0	0	0	0	0	0	0	0	0	0	0	0	0	0	0	0	0.487	0.509	0.443	0.408	2.478	0.365	0.583	0.000	0.000	0.000	0.000	0.000	0.000	0.000	0.000	0.000	0.000	0.000	0.000	0.000	0.000	80	535	507	421	-1.039	Error	Error	166	341	0	0	142	279	0	0	0	0
3	16	11	""	"iYDR086C"	13990	16360	120	834	742	394	83	88	37	90	89	0	902	859	386	266	279	99	85	80	0	0	0	0	0	0	0	0	0	0	0	0	0	0	0	0	0	0	0	1.181	1.111	1.053	0.992	2.070	1.073	0.765	0.000	0.000	0.000	0.000	0.000	0.000	0.000	0.000	0.000	0.000	0.000	0.000	0.000	0.000	120	577	1387	1252	0.240	Error	Error	751	636	0	0	659	593	0	0	0	0
3	17	11	""	"itR(ACG)D-1"	14170	16360	110	1560	1495	756	85	100	105	100	95	0	1339	1310	576	273	298	160	90	81	0	0	0	0	0	0	0	0	0	0	0	0	0	0	0	0	0	0	0	1.384	1.360	1.360	1.432	1.800	1.300	0.869	0.000	0.000	0.000	0.000	0.000	0.000	0.000	0.000	0.000	0.000	0.000	0.000	0.000	0.000	80	470	2541	2447	0.469	Error	Error	1475	1066	0	0	1410	1037	0	0	0	0
3	18	11	""	"iYDR102C"	14360	16360	110	813	794	431	92	106	102	86	80	0	839	784	370	277	310	188	78	68	0	0	0	0	0	0	0	0	0	0	0	0	0	0	0	0	0	0	0	1.283	1.385	1.367	1.293	1.815	1.267	0.744	0.000	0.000	0.000	0.000	0.000	0.000	0.000	0.000	0.000	0.000	0.000	0.000	0.000	0.000	80	506	1283	1209	0.359	Error	Error	721	562	0	0	702	507	0	0	0	0
3	19	11	""	"iYDRCsigma2"	14550	16360	100	251	241	111	91	96	34	81	75	0	626	591	284	280	293	94	76	70	0	0	0	0	0	0	0	0	0	0	0	0	0	0	0	0	0	0	0	0.462	0.482	0.448	0.429	1.924	0.365	0.615	0.000	0.000	0.000	0.000	0.000	0.000	0.000	0.000	0.000	0.000	0.000	0.000	0.000	0.000	80	454	506	461	-1.113	Error	Error	160	346	0	0	150	311	0	0	0	0
3	20	11	""	"iYDR109C"	14730	16360	110	1704	1444	890	95	131	166	83	77	0	1833	1510	868	293	513	2312	7	0	0	0	0	0	0	0	0	0	0	0	0	0	0	0	0	0	0	0	0	1.045	1.108	1.049	0.901	2.385	0.095	0.079	0.000	0.000	0.000	0.000	0.000	0.000	0.000	0.000	0.000	0.000	0.000	0.000	0.000	0.000	80	438	3149	2566	0.063	Error	Error	1609	1540	0	0	1349	1217	0	0	0	0
3	21	11	""	"iYDR418W"	14910	16350	150	170	280	294	106	134	140	33	21	0	367	484	386	304	366	513	15	5	0	0	0	0	0	0	0	0	0	0	0	0	0	0	0	0	0	0	0	1.016	0.967	0.640	0.600	3.270	0.619	0.632	0.000	0.000	0.000	0.000	0.000	0.000	0.000	0.000	0.000	0.000	0.000	0.000	0.000	0.000	156	665	127	354	0.023	Error	Error	64	63	0	0	174	180	0	0	-50	0
3	22	11	""	"iYDR421W"	15110	16360	120	698	721	449	98	104	37	90	90	0	3147	3064	2084	294	309	104	88	85	0	0	0	0	0	0	0	0	0	0	0	0	0	0	0	0	0	0	0	0.210	0.225	0.228	0.243	2.062	0.202	0.861	0.000	0.000	0.000	0.000	0.000	0.000	0.000	0.000	0.000	0.000	0.000	0.000	0.000	0.000	120	566	3453	3393	-2.249	Error	Error	600	2853	0	0	623	2770	0	0	0	0
3	1	12	""	"iYDR426C"	11120	16540	110	285	280	135	82	86	32	82	77	0	575	552	282	267	276	86	76	70	0	0	0	0	0	0	0	0	0	0	0	0	0	0	0	0	0	0	0	0.659	0.695	0.624	0.575	2.134	0.455	0.629	0.000	0.000	0.000	0.000	0.000	0.000	0.000	0.000	0.000	0.000	0.000	0.000	0.000	0.000	80	531	511	483	-0.601	Error	Error	203	308	0	0	198	285	0	0	0	0
3	2	12	""	"itK(CUU)D2"	11300	16550	110	239	230	128	80	84	33	72	65	0	695	612	309	265	272	83	76	75	0	0	0	0	0	0	0	0	0	0	0	0	0	0	0	0	0	0	0	0.370	0.432	0.387	0.325	2.384	0.312	0.568	0.000	0.000	0.000	0.000	0.000	0.000	0.000	0.000	0.000	0.000	0.000	0.000	0.000	0.000	80	483	589	497	-1.435	Error	Error	159	430	0	0	150	347	0	0	0	0
3	3	12	""	"iYDR448W"	11480	16540	110	371	324	152	76	86	56	82	75	0	860	797	414	267	291	138	77	73	0	0	0	0	0	0	0	0	0	0	0	0	0	0	0	0	0	0	0	0.497	0.468	0.445	0.429	2.136	0.365	0.727	0.000	0.000	0.000	0.000	0.000	0.000	0.000	0.000	0.000	0.000	0.000	0.000	0.000	0.000	80	482	888	778	-1.007	Error	Error	295	593	0	0	248	530	0	0	0	0
3	4	12	""	"iYDR452W"	11680	16540	110	405	382	193	78	88	56	83	77	0	881	782	414	266	287	141	75	72	0	0	0	0	0	0	0	0	0	0	0	0	0	0	0	0	0	0	0	0.532	0.589	0.535	0.497	1.914	0.483	0.736	0.000	0.000	0.000	0.000	0.000	0.000	0.000	0.000	0.000	0.000	0.000	0.000	0.000	0.000	80	520	942	820	-0.911	Error	Error	327	615	0	0	304	516	0	0	0	0
3	5	12	""	"iYDR470C"	11870	16540	110	978	878	467	80	103	142	83	80	0	966	875	470	268	299	179	76	71	0	0	0	0	0	0	0	0	0	0	0	0	0	0	0	0	0	0	0	1.287	1.315	1.235	1.107	2.587	1.169	0.737	0.000	0.000	0.000	0.000	0.000	0.000	0.000	0.000	0.000	0.000	0.000	0.000	0.000	0.000	80	493	1596	1405	0.363	Error	Error	898	698	0	0	798	607	0	0	0	0
3	6	12	""	"iYDR473C-0"	12060	16550	120	1785	1747	977	86	106	134	95	90	0	2931	2795	1557	272	299	167	90	87	0	0	0	0	0	0	0	0	0	0	0	0	0	0	0	0	0	0	0	0.639	0.658	0.671	0.700	2.005	0.614	0.868	0.000	0.000	0.000	0.000	0.000	0.000	0.000	0.000	0.000	0.000	0.000	0.000	0.000	0.000	120	544	4358	4184	-0.646	Error	Error	1699	2659	0	0	1661	2523	0	0	0	0
3	7	12	""	"iYDR476C"	12260	16550	120	2181	1945	873	92	93	32	100	99	0	1522	1409	575	282	287	87	90	87	0	0	0	0	0	0	0	0	0	0	0	0	0	0	0	0	0	0	0	1.685	1.644	1.684	1.676	1.935	1.675	0.828	0.000	0.000	0.000	0.000	0.000	0.000	0.000	0.000	0.000	0.000	0.000	0.000	0.000	0.000	120	523	3329	2980	0.752	Error	Error	2089	1240	0	0	1853	1127	0	0	0	0
3	8	12	""	"iYDR494W"	12430	16540	110	743	632	334	93	104	108	82	76	0	2736	2302	1334	280	333	339	80	72	0	0	0	0	0	0	0	0	0	0	0	0	0	0	0	0	0	0	0	0.265	0.267	0.271	0.290	1.778	0.233	0.832	0.000	0.000	0.000	0.000	0.000	0.000	0.000	0.000	0.000	0.000	0.000	0.000	0.000	0.000	80	484	3106	2561	-1.918	Error	Error	650	2456	0	0	539	2022	0	0	0	0
3	9	12	""	"iYDR498C"	12620	16540	110	2185	1874	993	90	115	150	91	83	0	1886	1656	878	275	341	348	78	75	0	0	0	0	0	0	0	0	0	0	0	0	0	0	0	0	0	0	0	1.300	1.292	1.321	1.245	1.878	1.207	0.857	0.000	0.000	0.000	0.000	0.000	0.000	0.000	0.000	0.000	0.000	0.000	0.000	0.000	0.000	80	496	3706	3165	0.379	Error	Error	2095	1611	0	0	1784	1381	0	0	0	0
3	10	12	""	"iYDR502C"	12820	16540	110	193	194	84	90	108	140	31	3	0	382	426	235	272	302	200	37	15	0	0	0	0	0	0	0	0	0	0	0	0	0	0	0	0	0	0	0	0.936	0.675	0.477	0.581	4.021	0.259	0.306	0.000	0.000	0.000	0.000	0.000	0.000	0.000	0.000	0.000	0.000	0.000	0.000	0.000	0.000	80	526	213	258	-0.095	Error	Error	103	110	0	0	104	154	0	0	0	0
3	11	12	""	"itV(AAC)E1"	13000	16540	110	2281	1885	934	91	119	188	91	85	0	1644	1477	724	279	314	222	86	76	0	0	0	0	0	0	0	0	0	0	0	0	0	0	0	0	0	0	0	1.604	1.497	1.474	1.559	1.695	1.393	0.836	0.000	0.000	0.000	0.000	0.000	0.000	0.000	0.000	0.000	0.000	0.000	0.000	0.000	0.000	80	518	3555	2992	0.682	Error	Error	2190	1365	0	0	1794	1198	0	0	0	0
3	12	12	""	"itI(AAU)E1"	13190	16540	110	198	194	78	93	120	187	13	0	0	514	502	245	283	322	222	51	17	0	0	0	0	0	0	0	0	0	0	0	0	0	0	0	0	0	0	0	0.455	0.461	0.334	0.349	2.764	0.257	0.372	0.000	0.000	0.000	0.000	0.000	0.000	0.000	0.000	0.000	0.000	0.000	0.000	0.000	0.000	80	522	336	320	-1.138	Error	Error	105	231	0	0	101	219	0	0	0	0
3	13	12	""	"iYERCdelta20"	13370	16540	110	1785	1608	1047	88	107	127	80	80	0	3121	2642	1808	281	335	330	72	71	0	0	0	0	0	0	0	0	0	0	0	0	0	0	0	0	0	0	0	0.598	0.644	0.596	0.590	2.361	0.583	0.851	0.000	0.000	0.000	0.000	0.000	0.000	0.000	0.000	0.000	0.000	0.000	0.000	0.000	0.000	80	530	4537	3881	-0.743	Error	Error	1697	2840	0	0	1520	2361	0	0	0	0
3	14	12	""	"iYER153C"	13570	16540	110	416	373	190	88	108	124	76	61	0	746	649	354	284	333	324	60	22	0	0	0	0	0	0	0	0	0	0	0	0	0	0	0	0	0	0	0	0.710	0.781	0.598	0.500	2.654	0.582	0.701	0.000	0.000	0.000	0.000	0.000	0.000	0.000	0.000	0.000	0.000	0.000	0.000	0.000	0.000	80	550	790	650	-0.494	Error	Error	328	462	0	0	285	365	0	0	0	0
3	15	12	""	"iYER157W"	13770	16550	110	243	218	102	85	90	39	76	71	0	824	701	432	277	286	97	70	68	0	0	0	0	0	0	0	0	0	0	0	0	0	0	0	0	0	0	0	0.289	0.314	0.252	0.241	2.175	0.225	0.632	0.000	0.000	0.000	0.000	0.000	0.000	0.000	0.000	0.000	0.000	0.000	0.000	0.000	0.000	80	513	705	557	-1.792	Error	Error	158	547	0	0	133	424	0	0	0	0
3	16	12	""	"iYER159C"	13940	16540	110	515	536	361	84	90	38	83	77	0	862	913	594	272	287	111	76	70	0	0	0	0	0	0	0	0	0	0	0	0	0	0	0	0	0	0	0	0.731	0.705	0.619	0.593	1.996	0.579	0.836	0.000	0.000	0.000	0.000	0.000	0.000	0.000	0.000	0.000	0.000	0.000	0.000	0.000	0.000	80	481	1021	1093	-0.453	Error	Error	431	590	0	0	452	641	0	0	0	0
3	17	12	""	"iYER174C"	14130	16540	110	509	471	247	87	99	62	83	78	0	783	783	440	280	307	146	76	72	0	0	0	0	0	0	0	0	0	0	0	0	0	0	0	0	0	0	0	0.839	0.763	0.682	0.673	2.202	0.595	0.775	0.000	0.000	0.000	0.000	0.000	0.000	0.000	0.000	0.000	0.000	0.000	0.000	0.000	0.000	80	503	925	887	-0.253	Error	Error	422	503	0	0	384	503	0	0	0	0
3	18	12	""	"iYER178W"	14310	16540	110	1020	955	545	84	107	117	87	78	0	2723	2405	1467	280	348	369	80	73	0	0	0	0	0	0	0	0	0	0	0	0	0	0	0	0	0	0	0	0.383	0.410	0.382	0.395	2.301	0.360	0.872	0.000	0.000	0.000	0.000	0.000	0.000	0.000	0.000	0.000	0.000	0.000	0.000	0.000	0.000	80	523	3379	2996	-1.384	Error	Error	936	2443	0	0	871	2125	0	0	0	0
3	19	12	""	"iYER181C"	14510	16540	110	675	654	396	94	127	330	68	42	0	935	899	529	292	353	360	70	42	0	0	0	0	0	0	0	0	0	0	0	0	0	0	0	0	0	0	0	0.904	0.923	0.835	0.844	2.137	0.753	0.758	0.000	0.000	0.000	0.000	0.000	0.000	0.000	0.000	0.000	0.000	0.000	0.000	0.000	0.000	80	528	1224	1167	-0.146	Error	Error	581	643	0	0	560	607	0	0	0	0
3	20	12	""	"iYFL064C"	14710	16540	130	29483	27275	13787	115	155	319	99	98	0	36834	31847	16316	314	387	529	100	98	0	0	0	0	0	0	0	0	0	0	0	0	0	0	0	0	0	0	0	0.804	0.861	0.845	0.860	1.659	0.839	0.878	0.000	0.000	0.000	0.000	0.000	0.000	0.000	0.000	0.000	0.000	0.000	0.000	0.000	0.000	120	620	65888	58693	-0.314	Error	Error	29368	36520	0	0	27160	31533	0	0	0	0
3	21	12	""	"iYFL061W"	14890	16540	110	670	588	332	131	159	140	73	70	0	1108	1012	589	328	408	602	62	18	0	0	0	0	0	0	0	0	0	0	0	0	0	0	0	0	0	0	0	0.691	0.668	0.599	0.579	1.792	0.306	0.574	0.000	0.000	0.000	0.000	0.000	0.000	0.000	0.000	0.000	0.000	0.000	0.000	0.000	0.000	80	449	1319	1141	-0.533	Error	Error	539	780	0	0	457	684	0	0	0	0
3	22	12	""	"iYFL056C-0"	15080	16540	120	1752	1505	837	113	120	53	90	88	0	2021	1874	1078	300	322	127	84	80	0	0	0	0	0	0	0	0	0	0	0	0	0	0	0	0	0	0	0	0.952	0.884	0.881	0.774	2.159	0.825	0.880	0.000	0.000	0.000	0.000	0.000	0.000	0.000	0.000	0.000	0.000	0.000	0.000	0.000	0.000	120	603	3360	2966	-0.070	Error	Error	1639	1721	0	0	1392	1574	0	0	0	0
3	1	13	""	"iYGL100W"	11110	16730	120	644	604	296	81	86	36	91	88	0	1136	1026	495	262	274	101	85	84	0	0	0	0	0	0	0	0	0	0	0	0	0	0	0	0	0	0	0	0.644	0.685	0.674	0.629	1.988	0.617	0.777	0.000	0.000	0.000	0.000	0.000	0.000	0.000	0.000	0.000	0.000	0.000	0.000	0.000	0.000	120	612	1437	1287	-0.634	Error	Error	563	874	0	0	523	764	0	0	0	0
3	2	13	""	"itH(GUG)G2"	11300	16730	120	830	786	416	78	83	31	95	94	0	2295	2001	1072	264	278	104	89	86	0	0	0	0	0	0	0	0	0	0	0	0	0	0	0	0	0	0	0	0.370	0.408	0.402	0.431	2.191	0.369	0.837	0.000	0.000	0.000	0.000	0.000	0.000	0.000	0.000	0.000	0.000	0.000	0.000	0.000	0.000	120	541	2783	2445	-1.433	Error	Error	752	2031	0	0	708	1737	0	0	0	0
3	3	13	""	"iYGL096W-0"	11500	16730	120	879	817	394	76	85	52	93	91	0	1626	1486	740	260	285	141	86	84	0	0	0	0	0	0	0	0	0	0	0	0	0	0	0	0	0	0	0	0.588	0.604	0.592	0.616	2.120	0.540	0.827	0.000	0.000	0.000	0.000	0.000	0.000	0.000	0.000	0.000	0.000	0.000	0.000	0.000	0.000	120	554	2169	1967	-0.766	Error	Error	803	1366	0	0	741	1226	0	0	0	0
3	4	13	""	"iYGL083W"	11680	16730	120	1546	1349	728	75	79	34	99	96	0	2052	1778	984	263	272	99	90	85	0	0	0	0	0	0	0	0	0	0	0	0	0	0	0	0	0	0	0	0.822	0.841	0.828	0.943	2.450	0.781	0.846	0.000	0.000	0.000	0.000	0.000	0.000	0.000	0.000	0.000	0.000	0.000	0.000	0.000	0.000	120	526	3260	2789	-0.282	Error	Error	1471	1789	0	0	1274	1515	0	0	0	0
3	5	13	""	"iYGL079W"	11870	16730	120	488	445	224	78	90	94	79	73	0	1456	1303	689	254	277	126	85	80	0	0	0	0	0	0	0	0	0	0	0	0	0	0	0	0	0	0	0	0.341	0.350	0.353	0.405	2.621	0.309	0.805	0.000	0.000	0.000	0.000	0.000	0.000	0.000	0.000	0.000	0.000	0.000	0.000	0.000	0.000	120	574	1612	1416	-1.552	Error	Error	410	1202	0	0	367	1049	0	0	0	0
3	6	13	""	"iYGL075C"	12060	16730	110	976	922	556	83	87	33	91	90	0	820	836	441	258	269	80	82	78	0	0	0	0	0	0	0	0	0	0	0	0	0	0	0	0	0	0	0	1.589	1.452	1.382	1.249	2.635	1.440	0.768	0.000	0.000	0.000	0.000	0.000	0.000	0.000	0.000	0.000	0.000	0.000	0.000	0.000	0.000	80	474	1455	1417	0.668	Error	Error	893	562	0	0	839	578	0	0	0	0
3	7	13	""	"iYGL056C"	12260	16730	120	1241	1103	596	86	89	35	91	89	0	1663	1480	804	265	279	87	86	82	0	0	0	0	0	0	0	0	0	0	0	0	0	0	0	0	0	0	0	0.826	0.837	0.822	0.735	2.134	0.776	0.813	0.000	0.000	0.000	0.000	0.000	0.000	0.000	0.000	0.000	0.000	0.000	0.000	0.000	0.000	120	545	2553	2232	-0.275	Error	Error	1155	1398	0	0	1017	1215	0	0	0	0
3	8	13	""	"iYGL053W"	12440	16730	110	793	652	372	86	92	50	85	77	0	1207	1132	658	271	291	173	77	73	0	0	0	0	0	0	0	0	0	0	0	0	0	0	0	0	0	0	0	0.755	0.657	0.657	0.544	2.160	0.569	0.795	0.000	0.000	0.000	0.000	0.000	0.000	0.000	0.000	0.000	0.000	0.000	0.000	0.000	0.000	80	492	1643	1427	-0.405	Error	Error	707	936	0	0	566	861	0	0	0	0
3	9	13	""	"iYGL049C"	12640	16730	120	1102	950	513	89	104	122	84	81	0	1190	1110	598	273	307	249	77	68	0	0	0	0	0	0	0	0	0	0	0	0	0	0	0	0	0	0	0	1.105	1.029	0.996	0.940	2.222	0.931	0.817	0.000	0.000	0.000	0.000	0.000	0.000	0.000	0.000	0.000	0.000	0.000	0.000	0.000	0.000	120	610	1930	1698	0.144	Error	Error	1013	917	0	0	861	837	0	0	0	0
3	10	13	""	"iYGL036W"	12830	16730	110	296	285	126	85	90	33	85	81	0	1173	1069	581	267	283	106	80	77	0	0	0	0	0	0	0	0	0	0	0	0	0	0	0	0	0	0	0	0.233	0.249	0.243	0.236	1.933	0.197	0.708	0.000	0.000	0.000	0.000	0.000	0.000	0.000	0.000	0.000	0.000	0.000	0.000	0.000	0.000	80	510	1117	1002	-2.102	Error	Error	211	906	0	0	200	802	0	0	0	0
3	11	13	""	"iYGL033W"	13020	16730	110	791	684	372	84	99	122	80	71	0	1443	1231	706	271	301	176	75	71	0	0	0	0	0	0	0	0	0	0	0	0	0	0	0	0	0	0	0	0.603	0.625	0.582	0.513	2.232	0.538	0.846	0.000	0.000	0.000	0.000	0.000	0.000	0.000	0.000	0.000	0.000	0.000	0.000	0.000	0.000	80	548	1879	1560	-0.729	Error	Error	707	1172	0	0	600	960	0	0	0	0
3	12	13	""	"iYGL029W"	13220	16730	110	359	337	169	83	90	42	82	77	0	1285	1163	686	272	292	132	75	75	0	0	0	0	0	0	0	0	0	0	0	0	0	0	0	0	0	0	0	0.272	0.285	0.261	0.251	2.314	0.240	0.753	0.000	0.000	0.000	0.000	0.000	0.000	0.000	0.000	0.000	0.000	0.000	0.000	0.000	0.000	80	510	1289	1145	-1.876	Error	Error	276	1013	0	0	254	891	0	0	0	0
3	13	13	""	"itT(UGU)G2"	13390	16730	110	323	299	160	83	93	89	71	65	0	799	683	387	276	307	224	70	60	0	0	0	0	0	0	0	0	0	0	0	0	0	0	0	0	0	0	0	0.459	0.531	0.433	0.372	2.163	0.374	0.691	0.000	0.000	0.000	0.000	0.000	0.000	0.000	0.000	0.000	0.000	0.000	0.000	0.000	0.000	80	502	763	623	-1.124	Error	Error	240	523	0	0	216	407	0	0	0	0
3	14	13	""	"iYGR258C-1"	13580	16730	110	526	579	420	84	104	99	82	77	0	849	832	537	276	313	204	72	63	0	0	0	0	0	0	0	0	0	0	0	0	0	0	0	0	0	0	0	0.771	0.890	0.688	0.730	2.337	0.703	0.741	0.000	0.000	0.000	0.000	0.000	0.000	0.000	0.000	0.000	0.000	0.000	0.000	0.000	0.000	80	546	1015	1051	-0.374	Error	Error	442	573	0	0	495	556	0	0	0	0
3	15	13	""	"iYGR263C"	13790	16730	110	716	634	367	85	106	103	78	77	0	1260	1133	693	279	324	222	75	70	0	0	0	0	0	0	0	0	0	0	0	0	0	0	0	0	0	0	0	0.643	0.643	0.578	0.528	1.816	0.550	0.784	0.000	0.000	0.000	0.000	0.000	0.000	0.000	0.000	0.000	0.000	0.000	0.000	0.000	0.000	80	509	1612	1403	-0.637	Error	Error	631	981	0	0	549	854	0	0	0	0
3	16	13	""	"iYGR281W"	13960	16730	110	552	501	272	89	108	84	81	75	0	2691	2417	1522	292	374	415	76	75	0	0	0	0	0	0	0	0	0	0	0	0	0	0	0	0	0	0	0	0.193	0.194	0.178	0.191	1.995	0.167	0.837	0.000	0.000	0.000	0.000	0.000	0.000	0.000	0.000	0.000	0.000	0.000	0.000	0.000	0.000	80	512	2862	2537	-2.373	Error	Error	463	2399	0	0	412	2125	0	0	0	0
3	17	13	""	"iYGR285C"	14160	16730	110	371	376	219	82	95	70	78	76	0	644	646	366	287	349	384	46	16	0	0	0	0	0	0	0	0	0	0	0	0	0	0	0	0	0	0	0	0.810	0.819	0.717	0.635	2.441	0.577	0.608	0.000	0.000	0.000	0.000	0.000	0.000	0.000	0.000	0.000	0.000	0.000	0.000	0.000	0.000	80	538	646	653	-0.305	Error	Error	289	357	0	0	294	359	0	0	0	0
3	18	13	""	"iYGR288W-0"	14340	16730	110	1295	1196	748	83	100	117	85	82	0	2726	2567	1626	278	327	310	78	77	0	0	0	0	0	0	0	0	0	0	0	0	0	0	0	0	0	0	0	0.495	0.486	0.493	0.487	2.246	0.442	0.826	0.000	0.000	0.000	0.000	0.000	0.000	0.000	0.000	0.000	0.000	0.000	0.000	0.000	0.000	80	538	3660	3402	-1.014	Error	Error	1212	2448	0	0	1113	2289	0	0	0	0
3	19	13	""	"iYHL046C"	14540	16730	110	1771	1556	939	97	107	79	90	87	0	2194	2161	1289	304	337	198	85	81	0	0	0	0	0	0	0	0	0	0	0	0	0	0	0	0	0	0	0	0.886	0.786	0.761	0.734	1.734	0.731	0.798	0.000	0.000	0.000	0.000	0.000	0.000	0.000	0.000	0.000	0.000	0.000	0.000	0.000	0.000	80	528	3564	3316	-0.175	Error	Error	1674	1890	0	0	1459	1857	0	0	0	0
3	20	13	""	"iYHL042W"	14720	16730	110	1024	1127	857	93	119	162	82	75	0	1765	1598	1164	292	352	284	73	71	0	0	0	0	0	0	0	0	0	0	0	0	0	0	0	0	0	0	0	0.632	0.792	0.660	0.719	2.467	0.724	0.757	0.000	0.000	0.000	0.000	0.000	0.000	0.000	0.000	0.000	0.000	0.000	0.000	0.000	0.000	80	509	2404	2340	-0.662	Error	Error	931	1473	0	0	1034	1306	0	0	0	0
3	21	13	""	"iYHL038C"	14920	16730	110	944	848	482	98	133	165	80	76	0	1146	1068	636	293	365	299	71	63	0	0	0	0	0	0	0	0	0	0	0	0	0	0	0	0	0	0	0	0.992	0.968	0.955	0.853	2.417	0.837	0.762	0.000	0.000	0.000	0.000	0.000	0.000	0.000	0.000	0.000	0.000	0.000	0.000	0.000	0.000	80	540	1699	1525	-0.012	Error	Error	846	853	0	0	750	775	0	0	0	0
3	22	13	""	"itH(GUG)H"	15110	16730	110	264	242	119	93	109	76	71	57	0	685	621	346	281	320	173	71	58	0	0	0	0	0	0	0	0	0	0	0	0	0	0	0	0	0	0	0	0.423	0.438	0.365	0.363	2.499	0.306	0.550	0.000	0.000	0.000	0.000	0.000	0.000	0.000	0.000	0.000	0.000	0.000	0.000	0.000	0.000	80	541	575	489	-1.240	Error	Error	171	404	0	0	149	340	0	0	0	0
3	1	14	""	"iYHL019C"	11120	16920	110	511	480	234	77	88	49	93	85	0	522	528	240	269	283	110	73	52	0	0	0	0	0	0	0	0	0	0	0	0	0	0	0	0	0	0	0	1.715	1.556	1.549	1.363	2.139	1.110	0.515	0.000	0.000	0.000	0.000	0.000	0.000	0.000	0.000	0.000	0.000	0.000	0.000	0.000	0.000	80	543	687	662	0.779	Error	Error	434	253	0	0	403	259	0	0	0	0
3	2	14	""	"iYHL015W"	11310	16920	110	318	297	154	83	94	52	77	72	0	899	795	477	277	298	129	71	68	0	0	0	0	0	0	0	0	0	0	0	0	0	0	0	0	0	0	0	0.378	0.413	0.353	0.339	2.323	0.328	0.716	0.000	0.000	0.000	0.000	0.000	0.000	0.000	0.000	0.000	0.000	0.000	0.000	0.000	0.000	80	511	857	732	-1.404	Error	Error	235	622	0	0	214	518	0	0	0	0
3	3	14	""	"iYIL118W"	11500	16930	110	438	398	207	85	96	75	80	76	0	1172	1035	570	278	313	233	76	70	0	0	0	0	0	0	0	0	0	0	0	0	0	0	0	0	0	0	0	0.395	0.413	0.376	0.382	1.955	0.343	0.770	0.000	0.000	0.000	0.000	0.000	0.000	0.000	0.000	0.000	0.000	0.000	0.000	0.000	0.000	80	534	1247	1070	-1.341	Error	Error	353	894	0	0	313	757	0	0	0	0
3	4	14	""	"iYIL114C"	11700	16920	110	563	659	481	83	94	62	82	80	0	567	623	389	270	300	148	68	50	0	0	0	0	0	0	0	0	0	0	0	0	0	0	0	0	0	0	0	1.616	1.632	1.434	1.259	2.914	1.345	0.687	0.000	0.000	0.000	0.000	0.000	0.000	0.000	0.000	0.000	0.000	0.000	0.000	0.000	0.000	80	510	777	929	0.693	Error	Error	480	297	0	0	576	353	0	0	0	0
3	5	14	""	"iYIL110W"	11880	16930	110	376	349	182	88	98	57	78	73	0	1328	1214	696	273	304	143	77	73	0	0	0	0	0	0	0	0	0	0	0	0	0	0	0	0	0	0	0	0.273	0.277	0.245	0.253	1.955	0.243	0.755	0.000	0.000	0.000	0.000	0.000	0.000	0.000	0.000	0.000	0.000	0.000	0.000	0.000	0.000	80	510	1343	1202	-1.873	Error	Error	288	1055	0	0	261	941	0	0	0	0
3	6	14	""	"iYIL096C"	12080	16920	110	471	418	229	86	90	37	80	78	0	904	793	457	275	294	119	71	70	0	0	0	0	0	0	0	0	0	0	0	0	0	0	0	0	0	0	0	0.612	0.641	0.553	0.456	2.362	0.517	0.758	0.000	0.000	0.000	0.000	0.000	0.000	0.000	0.000	0.000	0.000	0.000	0.000	0.000	0.000	80	522	1014	850	-0.708	Error	Error	385	629	0	0	332	518	0	0	0	0
3	7	14	""	"iYIL093C"	12270	16920	110	661	590	329	88	103	72	82	77	0	793	765	416	279	307	153	76	68	0	0	0	0	0	0	0	0	0	0	0	0	0	0	0	0	0	0	0	1.115	1.033	0.882	0.728	2.888	0.861	0.662	0.000	0.000	0.000	0.000	0.000	0.000	0.000	0.000	0.000	0.000	0.000	0.000	0.000	0.000	80	501	1087	988	0.157	Error	Error	573	514	0	0	502	486	0	0	0	0
3	8	14	""	"iYIL089W"	12450	16920	110	915	888	549	87	105	78	81	81	0	2048	1843	1210	274	322	246	75	71	0	0	0	0	0	0	0	0	0	0	0	0	0	0	0	0	0	0	0	0.467	0.511	0.454	0.434	2.804	0.444	0.772	0.000	0.000	0.000	0.000	0.000	0.000	0.000	0.000	0.000	0.000	0.000	0.000	0.000	0.000	80	500	2602	2370	-1.099	Error	Error	828	1774	0	0	801	1569	0	0	0	0
3	9	14	""	"iYIL072W"	12640	16930	110	791	692	385	87	110	103	78	78	0	2089	1898	1149	281	373	415	75	73	0	0	0	0	0	0	0	0	0	0	0	0	0	0	0	0	0	0	0	0.389	0.374	0.350	0.351	3.139	0.330	0.816	0.000	0.000	0.000	0.000	0.000	0.000	0.000	0.000	0.000	0.000	0.000	0.000	0.000	0.000	80	493	2512	2222	-1.361	Error	Error	704	1808	0	0	605	1617	0	0	0	0
3	10	14	""	"iYIL068C"	12830	16920	110	499	451	261	87	110	94	72	67	0	793	702	376	281	355	362	62	26	0	0	0	0	0	0	0	0	0	0	0	0	0	0	0	0	0	0	0	0.805	0.865	0.696	0.574	2.613	0.670	0.617	0.000	0.000	0.000	0.000	0.000	0.000	0.000	0.000	0.000	0.000	0.000	0.000	0.000	0.000	80	542	924	785	-0.313	Error	Error	412	512	0	0	364	421	0	0	0	0
3	11	14	""	"iYIL063C"	13020	16930	110	419	373	213	84	96	53	77	75	0	679	630	338	276	297	118	77	71	0	0	0	0	0	0	0	0	0	0	0	0	0	0	0	0	0	0	0	0.831	0.816	0.782	0.614	2.458	0.591	0.507	0.000	0.000	0.000	0.000	0.000	0.000	0.000	0.000	0.000	0.000	0.000	0.000	0.000	0.000	80	504	738	643	-0.267	Error	Error	335	403	0	0	289	354	0	0	0	0
3	12	14	""	"iYIL046W"	13220	16930	120	1163	1020	595	80	87	41	89	84	0	1521	1395	933	273	287	96	76	72	0	0	0	0	0	0	0	0	0	0	0	0	0	0	0	0	0	0	0	0.868	0.838	0.840	0.815	2.375	0.695	0.813	0.000	0.000	0.000	0.000	0.000	0.000	0.000	0.000	0.000	0.000	0.000	0.000	0.000	0.000	120	561	2331	2062	-0.205	Error	Error	1083	1248	0	0	940	1122	0	0	0	0
3	13	14	""	"iYIL042C"	13410	16920	110	655	543	309	80	93	60	83	76	0	711	625	327	264	284	119	75	68	0	0	0	0	0	0	0	0	0	0	0	0	0	0	0	0	0	0	0	1.286	1.283	1.244	0.895	2.661	1.030	0.656	0.000	0.000	0.000	0.000	0.000	0.000	0.000	0.000	0.000	0.000	0.000	0.000	0.000	0.000	80	484	1022	824	0.363	Error	Error	575	447	0	0	463	361	0	0	0	0
3	14	14	""	"iYIL038C"	13590	16920	110	812	779	501	78	104	103	83	73	0	620	601	306	263	297	171	72	52	0	0	0	0	0	0	0	0	0	0	0	0	0	0	0	0	0	0	0	2.056	2.074	1.939	1.615	2.897	1.843	0.622	0.000	0.000	0.000	0.000	0.000	0.000	0.000	0.000	0.000	0.000	0.000	0.000	0.000	0.000	80	505	1091	1039	1.040	Error	Error	734	357	0	0	701	338	0	0	0	0
3	15	14	""	"iYJL014W"	13780	16920	110	788	664	365	80	107	108	80	75	0	3480	2688	1572	273	372	416	76	72	0	0	0	0	0	0	0	0	0	0	0	0	0	0	0	0	0	0	0	0.221	0.242	0.245	0.256	1.933	0.214	0.867	0.000	0.000	0.000	0.000	0.000	0.000	0.000	0.000	0.000	0.000	0.000	0.000	0.000	0.000	80	522	3915	2999	-2.179	Error	Error	708	3207	0	0	584	2415	0	0	0	0
3	16	14	""	"itK(CUU)J"	13980	16920	110	698	642	370	82	107	109	78	76	0	1821	1551	905	276	395	480	73	67	0	0	0	0	0	0	0	0	0	0	0	0	0	0	0	0	0	0	0	0.399	0.439	0.443	0.448	2.442	0.397	0.784	0.000	0.000	0.000	0.000	0.000	0.000	0.000	0.000	0.000	0.000	0.000	0.000	0.000	0.000	80	521	2161	1835	-1.327	Error	Error	616	1545	0	0	560	1275	0	0	0	0
3	17	14	""	"iYJL010C"	14160	16930	110	520	453	225	68	80	85	80	72	0	1032	905	436	266	292	211	77	71	0	0	0	0	0	0	0	0	0	0	0	0	0	0	0	0	0	0	0	0.590	0.603	0.590	0.543	2.483	0.482	0.734	0.000	0.000	0.000	0.000	0.000	0.000	0.000	0.000	0.000	0.000	0.000	0.000	0.000	0.000	80	478	1218	1024	-0.761	Error	Error	452	766	0	0	385	639	0	0	0	0
3	18	14	""	"iYJR005W"	14350	16930	110	2321	2087	1208	77	128	281	82	80	0	3099	2805	1567	276	377	534	81	77	0	0	0	0	0	0	0	0	0	0	0	0	0	0	0	0	0	0	0	0.795	0.795	0.774	0.785	1.859	0.737	0.860	0.000	0.000	0.000	0.000	0.000	0.000	0.000	0.000	0.000	0.000	0.000	0.000	0.000	0.000	80	509	5067	4539	-0.331	Error	Error	2244	2823	0	0	2010	2529	0	0	0	0
3	19	14	""	"iYJR009C-0"	14560	16920	110	1414	1258	719	84	133	269	83	70	0	1350	1243	677	298	385	479	76	56	0	0	0	0	0	0	0	0	0	0	0	0	0	0	0	0	0	0	0	1.264	1.242	1.191	1.208	1.825	1.190	0.809	0.000	0.000	0.000	0.000	0.000	0.000	0.000	0.000	0.000	0.000	0.000	0.000	0.000	0.000	80	523	2382	2119	0.338	Error	Error	1330	1052	0	0	1174	945	0	0	0	0
3	20	14	""	"iYJR011C"	14740	16920	110	1729	1480	735	69	98	163	93	85	0	2108	1954	859	287	328	242	90	86	0	0	0	0	0	0	0	0	0	0	0	0	0	0	0	0	0	0	0	0.912	0.846	0.888	0.831	1.919	0.827	0.842	0.000	0.000	0.000	0.000	0.000	0.000	0.000	0.000	0.000	0.000	0.000	0.000	0.000	0.000	80	496	3481	3078	-0.134	Error	Error	1660	1821	0	0	1411	1667	0	0	0	0
3	21	14	""	"iYJR035W"	14920	16920	110	354	302	176	80	104	137	62	50	0	880	776	503	280	332	232	63	55	0	0	0	0	0	0	0	0	0	0	0	0	0	0	0	0	0	0	0	0.457	0.448	0.390	0.403	2.812	0.351	0.734	0.000	0.000	0.000	0.000	0.000	0.000	0.000	0.000	0.000	0.000	0.000	0.000	0.000	0.000	80	504	874	718	-1.131	Error	Error	274	600	0	0	222	496	0	0	0	0
3	22	14	""	"iYJR041C"	15120	16930	120	853	851	579	83	92	54	85	81	0	1190	1051	655	277	307	142	73	69	0	0	0	0	0	0	0	0	0	0	0	0	0	0	0	0	0	0	0	0.843	0.992	0.901	0.855	2.537	0.925	0.810	0.000	0.000	0.000	0.000	0.000	0.000	0.000	0.000	0.000	0.000	0.000	0.000	0.000	0.000	120	635	1683	1542	-0.246	Error	Error	770	913	0	0	768	774	0	0	0	0
3	1	15	""	"iYJRWdelta14"	11110	17110	110	1282	1178	588	76	85	46	100	96	0	2357	2114	995	275	296	138	93	91	0	0	0	0	0	0	0	0	0	0	0	0	0	0	0	0	0	0	0	0.579	0.599	0.581	0.624	1.781	0.583	0.868	0.000	0.000	0.000	0.000	0.000	0.000	0.000	0.000	0.000	0.000	0.000	0.000	0.000	0.000	80	559	3288	2941	-0.788	Error	Error	1206	2082	0	0	1102	1839	0	0	0	0
3	2	15	""	"itR(CCU)J"	11320	17110	110	236	247	121	85	95	49	76	65	0	846	795	508	279	309	135	71	65	0	0	0	0	0	0	0	0	0	0	0	0	0	0	0	0	0	0	0	0.266	0.314	0.300	0.262	2.819	0.240	0.632	0.000	0.000	0.000	0.000	0.000	0.000	0.000	0.000	0.000	0.000	0.000	0.000	0.000	0.000	80	513	718	678	-1.909	Error	Error	151	567	0	0	162	516	0	0	0	0
3	3	15	""	"iYJR056C"	11490	17120	110	1645	1504	818	93	112	88	91	85	0	2107	1910	1044	289	333	250	81	80	0	0	0	0	0	0	0	0	0	0	0	0	0	0	0	0	0	0	0	0.854	0.870	0.868	0.954	2.276	0.777	0.826	0.000	0.000	0.000	0.000	0.000	0.000	0.000	0.000	0.000	0.000	0.000	0.000	0.000	0.000	80	480	3370	3032	-0.228	Error	Error	1552	1818	0	0	1411	1621	0	0	0	0
3	4	15	""	"iYJR059W"	11680	17110	110	1318	1203	575	83	111	134	92	82	0	1797	1594	690	275	322	262	87	81	0	0	0	0	0	0	0	0	0	0	0	0	0	0	0	0	0	0	0	0.811	0.849	0.864	0.821	1.909	0.815	0.846	0.000	0.000	0.000	0.000	0.000	0.000	0.000	0.000	0.000	0.000	0.000	0.000	0.000	0.000	80	497	2757	2439	-0.301	Error	Error	1235	1522	0	0	1120	1319	0	0	0	0
3	5	15	""	"iYKL044W"	11870	17110	110	389	337	158	94	114	118	76	65	0	517	470	219	279	322	192	55	20	0	0	0	0	0	0	0	0	0	0	0	0	0	0	0	0	0	0	0	1.239	1.272	1.003	0.885	2.647	0.615	0.430	0.000	0.000	0.000	0.000	0.000	0.000	0.000	0.000	0.000	0.000	0.000	0.000	0.000	0.000	80	487	533	434	0.310	Error	Error	295	238	0	0	243	191	0	0	0	0
3	6	15	""	"iYKL040C"	12060	17110	120	1817	1537	898	87	98	51	91	88	0	1598	1452	806	270	298	142	80	76	0	0	0	0	0	0	0	0	0	0	0	0	0	0	0	0	0	0	0	1.303	1.227	1.206	1.215	2.082	1.190	0.826	0.000	0.000	0.000	0.000	0.000	0.000	0.000	0.000	0.000	0.000	0.000	0.000	0.000	0.000	120	556	3058	2632	0.382	Error	Error	1730	1328	0	0	1450	1182	0	0	0	0
3	7	15	""	"iYKL035W"	12240	17110	110	1293	1084	658	87	117	133	80	76	0	1640	1522	909	283	335	258	73	73	0	0	0	0	0	0	0	0	0	0	0	0	0	0	0	0	0	0	0	0.889	0.805	0.749	0.694	2.490	0.699	0.858	0.000	0.000	0.000	0.000	0.000	0.000	0.000	0.000	0.000	0.000	0.000	0.000	0.000	0.000	80	449	2563	2236	-0.170	Error	Error	1206	1357	0	0	997	1239	0	0	0	0
[truncated: 4,330,916 more chars]
