# Supplementary material for: Genome-Wide Mapping of the Cohesin Complex in the Yeast Saccharomyces cerevisiae
Source: PLoS Biol. 2004 Jul 27;2(9):e259. doi: 10.1371/journal.pbio.0020259 (PMC490026; doi:10.1371/journal.pbio.0020259)
Supplement: Dataset S13 — Cy3 = genomic DNA; Cy5 = ChIP cdc16-ts Mcd1-6HA in A364a. (4.6 MB XLS). [file pbio.0020259.sd013.xls]

ATF	1.0
27	82    
"Type=GenePix Results 2"
"DateTime=2003/04/19 10:55:27"
"Settings=L:\cohesin3\UP2_187.gps"
"GalFile=L:\arraying&printing\P2uber022803.GAL"
"PixelSize=10"
"Wavelengths=635	532"
"ImageFiles=L:\cohesin3\UP2_187_635.tif 0	L:\cohesin3\UP2_187_532.tif 0"
"NormalizationMethod=None"
"NormalizationFactors=1	1"
"JpegImage="
"RatioFormulations=W1/W2 (635/532)"
"Barcode="
"BackgroundSubtraction=LocalFeature"
"ImageOrigin=1500, 13520"
"JpegOrigin=1760, 13690"
"Creator=GenePix Pro 4.0.1.9"
"Scanner=GenePix 4000B [87097]"
"FocusPosition=0"
"Temperature=30.48"
"LinesAveraged=1"
"Comment=Cy5=total gDNA Cy3=smc3myc cdc16 myc ChIP A364a"
"PMTGain=590	620"
"ScanPower=100	100"
"LaserPower=3.31	3.93"
"LaserOnTime=20787	20800"
"ScanRegion=150,1352,2040,5014"
"Supplier="
"Block"	"Column"	"Row"	"Name"	"ID"	"X"	"Y"	"Dia."	"F635 Median"	"F635 Mean"	"F635 SD"	"B635 Median"	"B635 Mean"	"B635 SD"	"% > B635+1SD"	"% > B635+2SD"	"F635 % Sat."	"F532 Median"	"F532 Mean"	"F532 SD"	"B532 Median"	"B532 Mean"	"B532 SD"	"% > B532+1SD"	"% > B532+2SD"	"F532 % Sat."	"F3 Median"	"F3 Mean"	"F3 SD"	"B3 Median"	"B3 Mean"	"B3 SD"	"% > B3+1SD"	"% > B3+2SD"	"F3 % Sat."	"F4 Median"	"F4 Mean"	"F4 SD"	"B4 Median"	"B4 Mean"	"B4 SD"	"% > B4+1SD"	"% > B4+2SD"	"F4 % Sat."	"Ratio of Medians (635/532)"	"Ratio of Means (635/532)"	"Median of Ratios (635/532)"	"Mean of Ratios (635/532)"	"Ratios SD (635/532)"	"Rgn Ratio (635/532)"	"Rgn R� (635/532)"	"Ratio of Medians (Ratio/2)"	"Ratio of Means (Ratio/2)"	"Median of Ratios (Ratio/2)"	"Mean of Ratios (Ratio/2)"	"Ratios SD (Ratio/2)"	"Rgn Ratio (Ratio/2)"	"Rgn R� (Ratio/2)"	"Ratio of Medians (Ratio/3)"	"Ratio of Means (Ratio/3)"	"Median of Ratios (Ratio/3)"	"Mean of Ratios (Ratio/3)"	"Ratios SD (Ratio/3)"	"Rgn Ratio (Ratio/3)"	"Rgn R� (Ratio/3)"	"F Pixels"	"B Pixels"	"Sum of Medians"	"Sum of Means"	"Log Ratio (635/532)"	"Log Ratio (Ratio/2)"	"Log Ratio (Ratio/3)"	"F635 Median - B635"	"F532 Median - B532"	"F3 Median - B3"	"F4 Median - B4"	"F635 Mean - B635"	"F532 Mean - B532"	"F3 Mean - B3"	"F4 Mean - B4"	"Flags"	"Normalize"
1	1	1	"cdc27"	"YBL084C"	2020	14030	110	4749	4234	1785	72	90	147	98	95	0	6663	6030	2685	331	387	462	92	87	0	0	0	0	0	0	0	0	0	0	0	0	0	0	0	0	0	0	0	0.739	0.730	0.723	0.792	1.865	0.693	0.887	0.000	0.000	0.000	0.000	0.000	0.000	0.000	0.000	0.000	0.000	0.000	0.000	0.000	0.000	80	495	11009	9861	-0.437	Error	Error	4677	6332	0	0	4162	5699	0	0	0	0
1	2	1	""	"YBL113C"	2200	14040	150	40074	32256	24886	79	193	1002	81	78	7	33101	28021	22538	318	442	902	76	69	0	0	0	0	0	0	0	0	0	0	0	0	0	0	0	0	0	0	0	1.220	1.161	1.165	1.355	2.408	1.146	0.923	0.000	0.000	0.000	0.000	0.000	0.000	0.000	0.000	0.000	0.000	0.000	0.000	0.000	0.000	156	930	72778	59880	0.287	Error	Error	39995	32783	0	0	32177	27703	0	0	0	0
1	3	1	""	"YBR030W"	2390	14030	110	7267	6727	3975	78	241	1028	86	78	0	5112	4544	2781	310	455	852	76	73	0	0	0	0	0	0	0	0	0	0	0	0	0	0	0	0	0	0	0	1.497	1.570	1.573	1.751	2.029	1.501	0.875	0.000	0.000	0.000	0.000	0.000	0.000	0.000	0.000	0.000	0.000	0.000	0.000	0.000	0.000	80	548	11991	10883	0.582	Error	Error	7189	4802	0	0	6649	4234	0	0	0	0
1	4	1	""	"YBL086C"	2600	14030	120	5428	4751	2292	78	216	945	88	81	0	2970	2658	1201	292	416	786	82	77	0	0	0	0	0	0	0	0	0	0	0	0	0	0	0	0	0	0	0	1.998	1.975	1.928	2.113	1.875	2.037	0.879	0.000	0.000	0.000	0.000	0.000	0.000	0.000	0.000	0.000	0.000	0.000	0.000	0.000	0.000	120	651	8028	7039	0.998	Error	Error	5350	2678	0	0	4673	2366	0	0	0	0
1	5	1	"RER2"	"YBR002C"	2780	14020	110	5674	4907	2246	80	123	411	90	87	0	8769	7835	4051	277	395	1004	87	82	0	0	0	0	0	0	0	0	0	0	0	0	0	0	0	0	0	0	0	0.659	0.639	0.634	0.709	1.550	0.599	0.886	0.000	0.000	0.000	0.000	0.000	0.000	0.000	0.000	0.000	0.000	0.000	0.000	0.000	0.000	80	544	14086	12385	-0.602	Error	Error	5594	8492	0	0	4827	7558	0	0	0	0
1	6	1	""	"YBR032W"	3010	14040	150	103	126	89	79	108	320	2	0	0	302	394	258	270	346	784	3	0	0	0	0	0	0	0	0	0	0	0	0	0	0	0	0	0	0	0	0	0.750	0.379	0.338	0.393	3.194	0.257	0.449	0.000	0.000	0.000	0.000	0.000	0.000	0.000	0.000	0.000	0.000	0.000	0.000	0.000	0.000	156	904	56	171	-0.415	Error	Error	24	32	0	0	47	124	0	0	-50	0
1	7	1	"tel1"	"YBL088C"	3160	14020	110	375	354	154	78	84	43	90	83	0	728	733	417	270	284	117	86	75	0	0	0	0	0	0	0	0	0	0	0	0	0	0	0	0	0	0	0	0.648	0.596	0.574	0.548	2.469	0.409	0.578	0.000	0.000	0.000	0.000	0.000	0.000	0.000	0.000	0.000	0.000	0.000	0.000	0.000	0.000	80	460	755	739	-0.625	Error	Error	297	458	0	0	276	463	0	0	0	0
1	8	1	""	"YBR004C"	3360	14020	120	6225	5670	2005	75	82	42	100	100	0	24261	21316	8297	280	292	118	99	99	0	0	0	0	0	0	0	0	0	0	0	0	0	0	0	0	0	0	0	0.256	0.266	0.271	0.289	1.562	0.250	0.901	0.000	0.000	0.000	0.000	0.000	0.000	0.000	0.000	0.000	0.000	0.000	0.000	0.000	0.000	120	611	30131	26631	-1.963	Error	Error	6150	23981	0	0	5595	21036	0	0	0	0
1	9	1	"HMT1"	"YBR034C"	3530	14020	110	7060	6652	3137	85	132	406	97	93	0	6637	5923	3041	284	377	745	88	85	0	0	0	0	0	0	0	0	0	0	0	0	0	0	0	0	0	0	0	1.098	1.165	1.196	1.315	1.678	1.087	0.893	0.000	0.000	0.000	0.000	0.000	0.000	0.000	0.000	0.000	0.000	0.000	0.000	0.000	0.000	80	521	13328	12206	0.135	Error	Error	6975	6353	0	0	6567	5639	0	0	0	0
1	10	1	"MRP21"	"YBL090W"	3740	14030	120	9442	7968	3265	89	129	363	100	100	0	8537	7207	3344	284	357	661	94	88	0	0	0	0	0	0	0	0	0	0	0	0	0	0	0	0	0	0	0	1.133	1.138	1.112	1.255	1.543	1.095	0.916	0.000	0.000	0.000	0.000	0.000	0.000	0.000	0.000	0.000	0.000	0.000	0.000	0.000	0.000	120	665	17606	14802	0.181	Error	Error	9353	8253	0	0	7879	6923	0	0	0	0
1	11	1	""	"YBR006W"	3940	14020	110	7112	6224	2765	85	134	432	93	90	0	32736	27612	13127	276	673	3538	87	85	0	0	0	0	0	0	0	0	0	0	0	0	0	0	0	0	0	0	0	0.216	0.225	0.223	0.250	1.682	0.210	0.901	0.000	0.000	0.000	0.000	0.000	0.000	0.000	0.000	0.000	0.000	0.000	0.000	0.000	0.000	80	526	39487	33475	-2.208	Error	Error	7027	32460	0	0	6139	27336	0	0	0	0
1	12	1	"CSG2"	"YBR036C"	4120	14050	120	6576	5834	2764	79	124	436	94	89	0	7474	6289	3155	267	676	3597	75	50	0	0	0	0	0	0	0	0	0	0	0	0	0	0	0	0	0	0	0	0.901	0.956	0.933	1.072	1.758	0.598	0.519	0.000	0.000	0.000	0.000	0.000	0.000	0.000	0.000	0.000	0.000	0.000	0.000	0.000	0.000	120	509	13704	11777	-0.150	Error	Error	6497	7207	0	0	5755	6022	0	0	0	0
1	13	1	""	"YCL048W"	4280	14050	150	7562	6523	3810	76	81	47	94	92	0	18205	15727	9133	266	288	372	89	85	0	0	0	0	0	0	0	0	0	0	0	0	0	0	0	0	0	0	0	0.417	0.417	0.425	0.461	1.967	0.407	0.919	0.000	0.000	0.000	0.000	0.000	0.000	0.000	0.000	0.000	0.000	0.000	0.000	0.000	0.000	156	709	25425	21908	-1.261	Error	Error	7486	17939	0	0	6447	15461	0	0	0	0
1	14	1	""	"YCR010C"	4480	14050	120	9108	8157	3000	77	79	31	100	100	0	25693	22279	9047	268	273	78	100	100	0	0	0	0	0	0	0	0	0	0	0	0	0	0	0	0	0	0	0	0.355	0.367	0.371	0.399	1.616	0.347	0.908	0.000	0.000	0.000	0.000	0.000	0.000	0.000	0.000	0.000	0.000	0.000	0.000	0.000	0.000	120	554	34456	30091	-1.493	Error	Error	9031	25425	0	0	8080	22011	0	0	0	0
1	15	1	"bud5"	"YCR038C"	4670	14050	120	9566	9111	3925	77	85	48	100	100	0	9434	8647	3929	273	291	266	96	95	0	0	0	0	0	0	0	0	0	0	0	0	0	0	0	0	0	0	0	1.036	1.079	1.092	1.150	1.417	1.038	0.908	0.000	0.000	0.000	0.000	0.000	0.000	0.000	0.000	0.000	0.000	0.000	0.000	0.000	0.000	120	542	18650	17408	0.051	Error	Error	9489	9161	0	0	9034	8374	0	0	0	0
1	16	1	"apa1"	"YCL050C"	4850	14040	150	7607	6072	3549	82	176	817	82	76	0	25435	20237	12332	276	482	1813	80	76	0	0	0	0	0	0	0	0	0	0	0	0	0	0	0	0	0	0	0	0.299	0.300	0.310	0.313	1.783	0.277	0.891	0.000	0.000	0.000	0.000	0.000	0.000	0.000	0.000	0.000	0.000	0.000	0.000	0.000	0.000	156	750	32684	25951	-1.741	Error	Error	7525	25159	0	0	5990	19961	0	0	0	0
1	17	1	"PGK1"	"YCR012W"	5040	14040	150	4065	3203	1864	84	139	523	80	77	0	7733	6376	3755	272	341	501	80	76	0	0	0	0	0	0	0	0	0	0	0	0	0	0	0	0	0	0	0	0.534	0.511	0.529	0.542	1.870	0.489	0.910	0.000	0.000	0.000	0.000	0.000	0.000	0.000	0.000	0.000	0.000	0.000	0.000	0.000	0.000	156	837	11442	9223	-0.906	Error	Error	3981	7461	0	0	3119	6104	0	0	0	0
1	18	1	"MATalpha1"	"YCR040W"	5260	14050	120	8899	7671	3035	82	100	160	100	100	0	12498	11128	4477	275	327	511	99	96	0	0	0	0	0	0	0	0	0	0	0	0	0	0	0	0	0	0	0	0.721	0.699	0.711	0.701	1.391	0.671	0.908	0.000	0.000	0.000	0.000	0.000	0.000	0.000	0.000	0.000	0.000	0.000	0.000	0.000	0.000	120	597	21040	18442	-0.471	Error	Error	8817	12223	0	0	7589	10853	0	0	0	0
1	19	1	"PBN1"	"YCL052C"	5450	14050	120	5969	5348	2488	83	92	55	100	98	0	16208	15244	8112	278	312	362	95	93	0	0	0	0	0	0	0	0	0	0	0	0	0	0	0	0	0	0	0	0.369	0.352	0.355	0.388	1.638	0.312	0.905	0.000	0.000	0.000	0.000	0.000	0.000	0.000	0.000	0.000	0.000	0.000	0.000	0.000	0.000	120	583	21816	20231	-1.436	Error	Error	5886	15930	0	0	5265	14966	0	0	0	0
1	20	1	"POL4"	"YCR014C"	5650	14060	120	6745	6094	2330	86	158	802	94	90	0	15492	14057	6053	275	368	782	92	91	0	0	0	0	0	0	0	0	0	0	0	0	0	0	0	0	0	0	0	0.438	0.436	0.447	0.478	1.625	0.396	0.878	0.000	0.000	0.000	0.000	0.000	0.000	0.000	0.000	0.000	0.000	0.000	0.000	0.000	0.000	120	529	21876	19790	-1.192	Error	Error	6659	15217	0	0	6008	13782	0	0	0	0
1	21	1	"TSM1"	"YCR042C"	5820	14050	120	2444	2373	1250	84	89	38	100	99	0	2504	2421	1356	275	282	83	85	85	0	0	0	0	0	0	0	0	0	0	0	0	0	0	0	0	0	0	0	1.059	1.067	1.049	1.236	2.122	1.006	0.820	0.000	0.000	0.000	0.000	0.000	0.000	0.000	0.000	0.000	0.000	0.000	0.000	0.000	0.000	120	523	4589	4435	0.082	Error	Error	2360	2229	0	0	2289	2146	0	0	0	0
1	22	1	"KAR4"	"YCL055W"	6000	14060	120	4890	4658	1986	87	96	89	100	97	0	5905	5513	2626	279	302	225	94	92	0	0	0	0	0	0	0	0	0	0	0	0	0	0	0	0	0	0	0	0.854	0.873	0.886	0.979	1.676	0.835	0.897	0.000	0.000	0.000	0.000	0.000	0.000	0.000	0.000	0.000	0.000	0.000	0.000	0.000	0.000	120	584	10429	9805	-0.228	Error	Error	4803	5626	0	0	4571	5234	0	0	0	0
1	1	2	""	"YCR016W"	2010	14240	110	7545	6443	3729	77	231	996	87	82	0	14810	12798	7890	349	777	2546	77	73	0	0	0	0	0	0	0	0	0	0	0	0	0	0	0	0	0	0	0	0.516	0.511	0.533	0.606	1.836	0.472	0.902	0.000	0.000	0.000	0.000	0.000	0.000	0.000	0.000	0.000	0.000	0.000	0.000	0.000	0.000	80	471	21929	18815	-0.953	Error	Error	7468	14461	0	0	6366	12449	0	0	0	0
1	2	2	""	"YCR044C"	2200	14250	110	9199	7542	5074	93	599	2088	71	67	0	5297	4178	2750	341	1008	2728	65	37	0	0	0	0	0	0	0	0	0	0	0	0	0	0	0	0	0	0	0	1.837	1.941	1.927	2.000	2.028	1.885	0.867	0.000	0.000	0.000	0.000	0.000	0.000	0.000	0.000	0.000	0.000	0.000	0.000	0.000	0.000	80	509	14062	11286	0.878	Error	Error	9106	4956	0	0	7449	3837	0	0	0	0
1	3	2	"rad57"	"YDR004W"	2410	14240	110	6098	5436	2013	92	469	1817	88	81	0	30277	27697	10640	330	999	3503	92	90	0	0	0	0	0	0	0	0	0	0	0	0	0	0	0	0	0	0	0	0.201	0.195	0.198	0.197	1.405	0.186	0.935	0.000	0.000	0.000	0.000	0.000	0.000	0.000	0.000	0.000	0.000	0.000	0.000	0.000	0.000	80	538	35953	32711	-2.318	Error	Error	6006	29947	0	0	5344	27367	0	0	0	0
1	4	2	""	"YDR034C-C"	2600	14240	120	65535	55739	18645	97	198	523	100	100	66	51562	44414	17720	321	850	3496	96	91	0	0	0	0	0	0	0	0	0	0	0	0	0	0	0	0	0	0	0	1.277	1.262	1.230	1.377	1.747	1.192	0.920	0.000	0.000	0.000	0.000	0.000	0.000	0.000	0.000	0.000	0.000	0.000	0.000	0.000	0.000	120	504	116679	99735	0.353	Error	Error	65438	51241	0	0	55642	44093	0	0	0	0
1	5	2	"RPS13"	"YDR064W"	2770	14240	120	6605	5609	3552	97	127	204	89	85	0	6212	5212	3363	297	347	534	80	73	0	0	0	0	0	0	0	0	0	0	0	0	0	0	0	0	0	0	0	1.100	1.121	1.076	1.209	2.009	1.081	0.872	0.000	0.000	0.000	0.000	0.000	0.000	0.000	0.000	0.000	0.000	0.000	0.000	0.000	0.000	120	537	12423	10427	0.138	Error	Error	6508	5915	0	0	5512	4915	0	0	0	0
1	6	2	"SOK1"	"YDR006C"	2970	14240	120	3866	3751	1924	91	115	221	95	92	0	6219	6401	3931	280	316	380	90	88	0	0	0	0	0	0	0	0	0	0	0	0	0	0	0	0	0	0	0	0.636	0.598	0.615	0.693	1.826	0.543	0.854	0.000	0.000	0.000	0.000	0.000	0.000	0.000	0.000	0.000	0.000	0.000	0.000	0.000	0.000	120	559	9714	9781	-0.654	Error	Error	3775	5939	0	0	3660	6121	0	0	0	0
1	7	2	""	"YDR034W-B"	3180	14240	120	1723	1496	972	87	158	783	66	52	0	1488	1337	854	274	372	958	59	11	0	0	0	0	0	0	0	0	0	0	0	0	0	0	0	0	0	0	0	1.348	1.325	1.376	1.361	2.007	1.253	0.815	0.000	0.000	0.000	0.000	0.000	0.000	0.000	0.000	0.000	0.000	0.000	0.000	0.000	0.000	120	575	2850	2472	0.430	Error	Error	1636	1214	0	0	1409	1063	0	0	0	0
1	8	2	""	"YDR066C"	3350	14230	120	5965	5604	2786	86	92	54	100	99	0	14578	13121	6442	287	305	112	100	98	0	0	0	0	0	0	0	0	0	0	0	0	0	0	0	0	0	0	0	0.411	0.430	0.422	0.448	1.586	0.407	0.912	0.000	0.000	0.000	0.000	0.000	0.000	0.000	0.000	0.000	0.000	0.000	0.000	0.000	0.000	120	575	20170	18352	-1.281	Error	Error	5879	14291	0	0	5518	12834	0	0	0	0
1	9	2	""	"YDR008C"	3560	14230	110	5830	5080	2054	94	175	587	93	92	0	4668	4207	1690	298	417	711	88	87	0	0	0	0	0	0	0	0	0	0	0	0	0	0	0	0	0	0	0	1.313	1.276	1.302	1.318	1.425	1.259	0.892	0.000	0.000	0.000	0.000	0.000	0.000	0.000	0.000	0.000	0.000	0.000	0.000	0.000	0.000	80	515	10106	8895	0.392	Error	Error	5736	4370	0	0	4986	3909	0	0	0	0
1	10	2	""	"YDR036C"	3730	14230	120	12493	11192	6063	89	173	573	96	95	0	17398	14871	7964	281	435	1138	91	89	0	0	0	0	0	0	0	0	0	0	0	0	0	0	0	0	0	0	0	0.725	0.761	0.729	0.805	1.769	0.737	0.897	0.000	0.000	0.000	0.000	0.000	0.000	0.000	0.000	0.000	0.000	0.000	0.000	0.000	0.000	120	548	29521	25693	-0.465	Error	Error	12404	17117	0	0	11103	14590	0	0	0	0
1	11	2	"DOS2"	"YDR068W"	3920	14230	110	9757	7886	4854	87	313	1425	73	72	0	26338	21354	12861	277	1117	4725	75	75	0	0	0	0	0	0	0	0	0	0	0	0	0	0	0	0	0	0	0	0.371	0.370	0.392	0.408	1.746	0.358	0.923	0.000	0.000	0.000	0.000	0.000	0.000	0.000	0.000	0.000	0.000	0.000	0.000	0.000	0.000	80	550	35731	28876	-1.430	Error	Error	9670	26061	0	0	7799	21077	0	0	0	0
1	12	2	""	"YDR010C"	4130	14230	120	3756	3242	1372	88	336	1491	80	66	0	3523	3112	1375	282	1201	4925	2	0	0	0	0	0	0	0	0	0	0	0	0	0	0	0	0	0	0	0	0	1.132	1.114	1.108	1.159	1.626	0.991	0.729	0.000	0.000	0.000	0.000	0.000	0.000	0.000	0.000	0.000	0.000	0.000	0.000	0.000	0.000	120	505	6909	5984	0.179	Error	Error	3668	3241	0	0	3154	2830	0	0	0	0
1	13	2	"ENA5"	"YDR038C"	4310	14230	120	5728	5564	2763	83	114	300	96	94	0	6843	6949	3853	271	368	840	90	82	0	0	0	0	0	0	0	0	0	0	0	0	0	0	0	0	0	0	0	0.859	0.821	0.816	0.899	1.933	0.766	0.800	0.000	0.000	0.000	0.000	0.000	0.000	0.000	0.000	0.000	0.000	0.000	0.000	0.000	0.000	120	463	12217	12159	-0.219	Error	Error	5645	6572	0	0	5481	6678	0	0	0	0
1	14	2	""	"YDR070C"	4490	14230	120	2261	1991	801	79	109	237	94	91	0	2213	2074	824	268	352	745	87	72	0	0	0	0	0	0	0	0	0	0	0	0	0	0	0	0	0	0	0	1.122	1.059	1.080	1.078	1.615	0.771	0.578	0.000	0.000	0.000	0.000	0.000	0.000	0.000	0.000	0.000	0.000	0.000	0.000	0.000	0.000	120	554	4127	3718	0.166	Error	Error	2182	1945	0	0	1912	1806	0	0	0	0
1	15	2	""	"YDR366C"	4710	14220	110	18253	14631	6724	91	234	1086	95	91	0	25844	23172	10399	283	691	2777	92	88	0	0	0	0	0	0	0	0	0	0	0	0	0	0	0	0	0	0	0	0.711	0.635	0.666	0.639	1.439	0.618	0.929	0.000	0.000	0.000	0.000	0.000	0.000	0.000	0.000	0.000	0.000	0.000	0.000	0.000	0.000	80	477	43723	37429	-0.493	Error	Error	18162	25561	0	0	14540	22889	0	0	0	0
1	16	2	""	"YDR398W"	4880	14220	110	5481	5790	3206	94	384	1413	86	80	0	4233	4339	2243	294	825	2831	67	27	0	0	0	0	0	0	0	0	0	0	0	0	0	0	0	0	0	0	0	1.368	1.408	1.429	1.472	1.536	0.917	0.602	0.000	0.000	0.000	0.000	0.000	0.000	0.000	0.000	0.000	0.000	0.000	0.000	0.000	0.000	80	490	9326	9741	0.452	Error	Error	5387	3939	0	0	5696	4045	0	0	0	0
1	17	2	""	"YDR430C"	5090	14220	110	4676	5065	2744	95	299	1040	96	86	0	3726	4013	1934	291	495	922	95	85	0	0	0	0	0	0	0	0	0	0	0	0	0	0	0	0	0	0	0	1.334	1.335	1.306	1.328	1.460	1.427	0.843	0.000	0.000	0.000	0.000	0.000	0.000	0.000	0.000	0.000	0.000	0.000	0.000	0.000	0.000	80	517	8016	8692	0.415	Error	Error	4581	3435	0	0	4970	3722	0	0	0	0
1	18	2	"YPR1"	"YDR368W"	5270	14220	110	4679	4236	2033	92	287	940	86	80	0	7735	7028	3559	288	629	1467	86	80	0	0	0	0	0	0	0	0	0	0	0	0	0	0	0	0	0	0	0	0.616	0.615	0.654	0.658	1.532	0.590	0.870	0.000	0.000	0.000	0.000	0.000	0.000	0.000	0.000	0.000	0.000	0.000	0.000	0.000	0.000	80	502	12034	10884	-0.699	Error	Error	4587	7447	0	0	4144	6740	0	0	0	0
1	19	2	""	"YDR400W"	5480	14230	120	8878	8261	3397	89	203	682	97	92	0	17058	15061	6441	279	535	1339	95	90	0	0	0	0	0	0	0	0	0	0	0	0	0	0	0	0	0	0	0	0.524	0.553	0.552	0.592	1.553	0.526	0.907	0.000	0.000	0.000	0.000	0.000	0.000	0.000	0.000	0.000	0.000	0.000	0.000	0.000	0.000	120	522	25568	22954	-0.933	Error	Error	8789	16779	0	0	8172	14782	0	0	0	0
1	20	2	"NPL3"	"YDR432W"	5630	14220	110	10175	8823	4259	95	331	1522	88	83	0	7423	6494	3153	292	546	1450	87	78	0	0	0	0	0	0	0	0	0	0	0	0	0	0	0	0	0	0	0	1.414	1.407	1.447	1.451	1.498	1.428	0.889	0.000	0.000	0.000	0.000	0.000	0.000	0.000	0.000	0.000	0.000	0.000	0.000	0.000	0.000	80	437	17211	14930	0.499	Error	Error	10080	7131	0	0	8728	6202	0	0	0	0
1	21	2	""	"YDR370C"	5860	14230	120	13691	11592	5071	94	277	1318	96	89	0	7472	6655	2800	283	494	1280	90	83	0	0	0	0	0	0	0	0	0	0	0	0	0	0	0	0	0	0	0	1.891	1.804	1.861	1.824	1.375	1.851	0.914	0.000	0.000	0.000	0.000	0.000	0.000	0.000	0.000	0.000	0.000	0.000	0.000	0.000	0.000	120	529	20786	17870	0.919	Error	Error	13597	7189	0	0	11498	6372	0	0	0	0
1	22	2	"DIT2"	"YDR402C"	6040	14230	120	6480	6209	2227	85	98	123	100	100	0	14976	14277	5121	260	285	276	99	99	0	0	0	0	0	0	0	0	0	0	0	0	0	0	0	0	0	0	0	0.435	0.437	0.445	0.447	1.498	0.419	0.905	0.000	0.000	0.000	0.000	0.000	0.000	0.000	0.000	0.000	0.000	0.000	0.000	0.000	0.000	120	564	21111	20141	-1.202	Error	Error	6395	14716	0	0	6124	14017	0	0	0	0
1	1	3	""	"YDR434W"	2050	14420	120	6671	5991	4996	76	216	895	77	67	0	6806	6960	6224	333	707	2335	63	57	0	0	0	0	0	0	0	0	0	0	0	0	0	0	0	0	0	0	0	1.019	0.893	0.848	1.186	2.850	0.826	0.904	0.000	0.000	0.000	0.000	0.000	0.000	0.000	0.000	0.000	0.000	0.000	0.000	0.000	0.000	120	578	13068	12542	0.027	Error	Error	6595	6473	0	0	5915	6627	0	0	0	0
1	2	3	""	"YDR372C"	2240	14430	120	7342	6325	4164	89	289	1264	79	71	0	8883	7609	4959	330	512	949	80	75	0	0	0	0	0	0	0	0	0	0	0	0	0	0	0	0	0	0	0	0.848	0.857	0.840	0.933	1.876	0.838	0.906	0.000	0.000	0.000	0.000	0.000	0.000	0.000	0.000	0.000	0.000	0.000	0.000	0.000	0.000	120	544	15806	13515	-0.238	Error	Error	7253	8553	0	0	6236	7279	0	0	0	0
1	3	3	"rpb7"	"YDR404C"	2430	14420	110	6074	5765	4035	103	246	777	81	76	0	7002	6605	4303	340	670	2164	77	72	0	0	0	0	0	0	0	0	0	0	0	0	0	0	0	0	0	0	0	0.896	0.904	0.892	0.922	1.543	0.917	0.887	0.000	0.000	0.000	0.000	0.000	0.000	0.000	0.000	0.000	0.000	0.000	0.000	0.000	0.000	80	520	12633	11927	-0.158	Error	Error	5971	6662	0	0	5662	6265	0	0	0	0
1	4	3	"PPZ2"	"YDR436W"	2630	14420	120	7619	6763	4282	106	231	717	86	81	0	5573	4854	3304	311	507	1190	72	68	0	0	0	0	0	0	0	0	0	0	0	0	0	0	0	0	0	0	0	1.428	1.465	1.439	1.793	2.111	1.407	0.895	0.000	0.000	0.000	0.000	0.000	0.000	0.000	0.000	0.000	0.000	0.000	0.000	0.000	0.000	120	578	12775	11200	0.514	Error	Error	7513	5262	0	0	6657	4543	0	0	0	0
1	5	3	"LSM4"	"YER112W"	2840	14420	110	5775	5152	3842	90	179	567	77	71	0	5385	4768	3355	282	412	816	72	71	0	0	0	0	0	0	0	0	0	0	0	0	0	0	0	0	0	0	0	1.114	1.128	1.116	1.145	1.871	1.095	0.890	0.000	0.000	0.000	0.000	0.000	0.000	0.000	0.000	0.000	0.000	0.000	0.000	0.000	0.000	80	511	10788	9548	0.156	Error	Error	5685	5103	0	0	5062	4486	0	0	0	0
1	6	3	"COX15"	"YER141W"	3030	14430	110	9213	8844	7232	89	349	1368	73	68	0	10726	9283	6971	278	678	1892	71	66	0	0	0	0	0	0	0	0	0	0	0	0	0	0	0	0	0	0	0	0.873	0.972	0.938	1.089	2.187	0.956	0.875	0.000	0.000	0.000	0.000	0.000	0.000	0.000	0.000	0.000	0.000	0.000	0.000	0.000	0.000	80	523	19572	17760	-0.195	Error	Error	9124	10448	0	0	8755	9005	0	0	0	0
1	7	3	"BRR2"	"YER172C"	3220	14430	110	588	541	288	91	250	1121	2	0	0	1075	1043	558	290	551	1630	6	0	0	0	0	0	0	0	0	0	0	0	0	0	0	0	0	0	0	0	0	0.633	0.598	0.585	0.580	2.677	0.462	0.670	0.000	0.000	0.000	0.000	0.000	0.000	0.000	0.000	0.000	0.000	0.000	0.000	0.000	0.000	80	514	1282	1203	-0.659	Error	Error	497	785	0	0	450	753	0	0	0	0
1	8	3	"BOI2"	"YER114C"	3420	14420	110	4143	3768	2059	85	124	312	91	86	0	2725	2469	1330	276	330	355	82	77	0	0	0	0	0	0	0	0	0	0	0	0	0	0	0	0	0	0	0	1.657	1.679	1.719	1.867	1.711	1.658	0.834	0.000	0.000	0.000	0.000	0.000	0.000	0.000	0.000	0.000	0.000	0.000	0.000	0.000	0.000	80	525	6507	5876	0.729	Error	Error	4058	2449	0	0	3683	2193	0	0	0	0
1	9	3	"DDI1"	"YER143W"	3600	14420	110	8631	7987	4555	84	265	1021	90	80	0	23890	21074	12128	281	879	3718	81	77	0	0	0	0	0	0	0	0	0	0	0	0	0	0	0	0	0	0	0	0.362	0.380	0.398	0.422	1.740	0.364	0.897	0.000	0.000	0.000	0.000	0.000	0.000	0.000	0.000	0.000	0.000	0.000	0.000	0.000	0.000	80	524	32156	28696	-1.466	Error	Error	8547	23609	0	0	7903	20793	0	0	0	0
1	10	3	"GRX4"	"YER174C"	3790	14420	110	3512	3293	2057	84	268	1010	75	72	0	4359	4019	2350	276	904	3727	60	6	0	0	0	0	0	0	0	0	0	0	0	0	0	0	0	0	0	0	0	0.840	0.857	0.864	0.884	2.056	0.821	0.859	0.000	0.000	0.000	0.000	0.000	0.000	0.000	0.000	0.000	0.000	0.000	0.000	0.000	0.000	80	531	7511	6952	-0.252	Error	Error	3428	4083	0	0	3209	3743	0	0	0	0
1	11	3	""	"YER116C"	3990	14420	110	7228	6042	3120	86	385	1333	81	77	0	3791	3293	1690	277	760	2814	68	1	0	0	0	0	0	0	0	0	0	0	0	0	0	0	0	0	0	0	0	2.032	1.975	1.944	2.036	1.502	2.072	0.895	0.000	0.000	0.000	0.000	0.000	0.000	0.000	0.000	0.000	0.000	0.000	0.000	0.000	0.000	80	546	10656	8972	1.023	Error	Error	7142	3514	0	0	5956	3016	0	0	0	0
1	12	3	"FTR1"	"YER145C"	4170	14420	110	6646	6431	3504	91	428	1462	82	78	0	4779	4403	2397	279	539	1037	80	78	0	0	0	0	0	0	0	0	0	0	0	0	0	0	0	0	0	0	0	1.457	1.537	1.637	1.714	1.868	1.548	0.887	0.000	0.000	0.000	0.000	0.000	0.000	0.000	0.000	0.000	0.000	0.000	0.000	0.000	0.000	80	512	11055	10464	0.543	Error	Error	6555	4500	0	0	6340	4124	0	0	0	0
1	13	3	"ECM32"	"YER176W"	4360	14430	110	2571	3028	2699	85	288	1080	73	56	0	1989	2130	1660	276	453	892	70	48	0	0	0	0	0	0	0	0	0	0	0	0	0	0	0	0	0	0	0	1.451	1.587	1.542	1.741	2.218	1.556	0.823	0.000	0.000	0.000	0.000	0.000	0.000	0.000	0.000	0.000	0.000	0.000	0.000	0.000	0.000	80	540	4199	4797	0.537	Error	Error	2486	1713	0	0	2943	1854	0	0	0	0
1	14	3	"SSU81"	"YER118C"	4560	14420	110	12847	10931	5717	85	202	718	95	85	0	23512	19973	11079	278	589	2385	83	80	0	0	0	0	0	0	0	0	0	0	0	0	0	0	0	0	0	0	0	0.549	0.551	0.555	0.630	1.612	0.518	0.930	0.000	0.000	0.000	0.000	0.000	0.000	0.000	0.000	0.000	0.000	0.000	0.000	0.000	0.000	80	535	35996	30541	-0.864	Error	Error	12762	23234	0	0	10846	19695	0	0	0	0
1	15	3	""	"YER147C"	4740	14420	110	7964	7113	3360	93	344	1257	87	80	0	5350	4720	2278	285	769	2717	77	41	0	0	0	0	0	0	0	0	0	0	0	0	0	0	0	0	0	0	0	1.554	1.583	1.585	1.765	1.576	1.219	0.597	0.000	0.000	0.000	0.000	0.000	0.000	0.000	0.000	0.000	0.000	0.000	0.000	0.000	0.000	80	548	12936	11455	0.636	Error	Error	7871	5065	0	0	7020	4435	0	0	0	0
1	16	3	"pda1"	"YER178W"	4940	14420	110	7137	6391	3387	89	323	1162	86	77	0	11493	10358	5766	275	606	1659	80	77	0	0	0	0	0	0	0	0	0	0	0	0	0	0	0	0	0	0	0	0.628	0.625	0.644	0.770	1.912	0.593	0.906	0.000	0.000	0.000	0.000	0.000	0.000	0.000	0.000	0.000	0.000	0.000	0.000	0.000	0.000	80	554	18266	16385	-0.671	Error	Error	7048	11218	0	0	6302	10083	0	0	0	0
1	17	3	"pmr1"	"YGL167C"	5120	14430	110	353	364	171	89	171	578	5	0	0	831	766	369	281	491	1462	0	0	0	0	0	0	0	0	0	0	0	0	0	0	0	0	0	0	0	0	0	0.480	0.567	0.507	0.526	2.158	0.330	0.913	0.000	0.000	0.000	0.000	0.000	0.000	0.000	0.000	0.000	0.000	0.000	0.000	0.000	0.000	80	547	814	760	-1.059	Error	Error	264	550	0	0	275	485	0	0	0	0
1	18	3	""	"YGL199C"	5320	14430	110	5573	4731	2498	91	154	410	87	85	0	2873	2495	1313	273	361	563	77	76	0	0	0	0	0	0	0	0	0	0	0	0	0	0	0	0	0	0	0	2.108	2.088	2.149	2.520	1.957	2.114	0.898	0.000	0.000	0.000	0.000	0.000	0.000	0.000	0.000	0.000	0.000	0.000	0.000	0.000	0.000	80	562	8082	6862	1.076	Error	Error	5482	2600	0	0	4640	2222	0	0	0	0
1	19	3	""	"YGL230C"	5510	14430	110	3956	3351	1746	94	181	440	86	82	0	6744	5885	3034	272	436	895	83	78	0	0	0	0	0	0	0	0	0	0	0	0	0	0	0	0	0	0	0	0.597	0.580	0.590	0.575	1.666	0.546	0.899	0.000	0.000	0.000	0.000	0.000	0.000	0.000	0.000	0.000	0.000	0.000	0.000	0.000	0.000	80	526	10334	8870	-0.745	Error	Error	3862	6472	0	0	3257	5613	0	0	0	0
1	20	3	"SUA5"	"YGL169W"	5700	14420	110	7570	6363	3302	95	297	1144	86	80	0	13989	11579	6038	287	746	2264	82	77	0	0	0	0	0	0	0	0	0	0	0	0	0	0	0	0	0	0	0	0.546	0.555	0.554	0.549	1.349	0.525	0.921	0.000	0.000	0.000	0.000	0.000	0.000	0.000	0.000	0.000	0.000	0.000	0.000	0.000	0.000	80	559	21177	17560	-0.874	Error	Error	7475	13702	0	0	6268	11292	0	0	0	0
1	21	3	"MCM6"	"YGL201C"	5890	14420	110	1529	1657	1133	89	236	887	78	27	0	2069	2284	1593	269	642	2127	41	10	0	0	0	0	0	0	0	0	0	0	0	0	0	0	0	0	0	0	0	0.800	0.778	0.743	0.809	1.660	0.656	0.826	0.000	0.000	0.000	0.000	0.000	0.000	0.000	0.000	0.000	0.000	0.000	0.000	0.000	0.000	80	533	3240	3583	-0.322	Error	Error	1440	1800	0	0	1568	2015	0	0	0	0
1	22	3	""	"YGL232W"	6080	14420	110	6768	5679	2775	91	217	762	88	83	0	12399	11173	5679	268	589	1911	86	81	0	0	0	0	0	0	0	0	0	0	0	0	0	0	0	0	0	0	0	0.550	0.512	0.520	0.531	1.459	0.500	0.913	0.000	0.000	0.000	0.000	0.000	0.000	0.000	0.000	0.000	0.000	0.000	0.000	0.000	0.000	80	550	18808	16493	-0.861	Error	Error	6677	12131	0	0	5588	10905	0	0	0	0
1	1	4	"ROK1"	"YGL171W"	2100	14620	120	10402	9355	4096	77	118	289	98	96	0	10741	9627	4535	316	415	701	92	90	0	0	0	0	0	0	0	0	0	0	0	0	0	0	0	0	0	0	0	0.990	0.996	0.995	1.054	1.515	0.968	0.929	0.000	0.000	0.000	0.000	0.000	0.000	0.000	0.000	0.000	0.000	0.000	0.000	0.000	0.000	120	612	20750	18589	-0.014	Error	Error	10325	10425	0	0	9278	9311	0	0	0	0
1	2	4	"kex1"	"YGL203C"	2280	14620	110	7593	7862	4887	95	311	1213	88	82	0	4718	5001	2964	312	554	1106	81	80	0	0	0	0	0	0	0	0	0	0	0	0	0	0	0	0	0	0	0	1.702	1.656	1.714	1.919	1.782	1.672	0.831	0.000	0.000	0.000	0.000	0.000	0.000	0.000	0.000	0.000	0.000	0.000	0.000	0.000	0.000	80	494	11904	12456	0.767	Error	Error	7498	4406	0	0	7767	4689	0	0	0	0
1	3	4	"ade5,7"	"YGL234W"	2480	14630	110	9468	8347	5686	110	332	1222	82	73	0	5020	4412	2890	321	538	1055	71	68	0	0	0	0	0	0	0	0	0	0	0	0	0	0	0	0	0	0	0	1.991	2.013	2.034	2.282	1.880	2.013	0.880	0.000	0.000	0.000	0.000	0.000	0.000	0.000	0.000	0.000	0.000	0.000	0.000	0.000	0.000	80	550	14057	12328	0.994	Error	Error	9358	4699	0	0	8237	4091	0	0	0	0
1	4	4	"KEM1"	"YGL173C"	2660	14620	110	1776	1989	1568	102	187	452	87	77	0	1993	2177	1604	293	401	545	83	68	0	0	0	0	0	0	0	0	0	0	0	0	0	0	0	0	0	0	0	0.985	1.002	0.988	1.036	1.781	0.969	0.731	0.000	0.000	0.000	0.000	0.000	0.000	0.000	0.000	0.000	0.000	0.000	0.000	0.000	0.000	80	513	3374	3771	-0.022	Error	Error	1674	1700	0	0	1887	1884	0	0	0	0
1	5	4	"POX1"	"YGL205W"	2840	14610	110	8901	7950	5963	101	463	1649	75	67	0	6032	4838	3655	281	589	1266	63	62	0	0	0	0	0	0	0	0	0	0	0	0	0	0	0	0	0	0	0	1.530	1.722	1.773	2.241	2.286	1.711	0.860	0.000	0.000	0.000	0.000	0.000	0.000	0.000	0.000	0.000	0.000	0.000	0.000	0.000	0.000	80	536	14551	12406	0.614	Error	Error	8800	5751	0	0	7849	4557	0	0	0	0
1	6	4	""	"YGL236C"	3030	14620	110	8191	7812	4564	100	715	2272	80	75	0	8626	7001	4707	286	893	2169	70	63	0	0	0	0	0	0	0	0	0	0	0	0	0	0	0	0	0	0	0	0.970	1.148	1.170	1.635	2.295	1.047	0.901	0.000	0.000	0.000	0.000	0.000	0.000	0.000	0.000	0.000	0.000	0.000	0.000	0.000	0.000	80	545	16431	14427	-0.044	Error	Error	8091	8340	0	0	7712	6715	0	0	0	0
1	7	4	"RNH70"	"YGR276C"	3240	14610	110	9332	8078	3772	97	578	1953	87	76	0	5153	4268	2222	286	781	1952	76	63	0	0	0	0	0	0	0	0	0	0	0	0	0	0	0	0	0	0	0	1.897	2.004	2.088	2.393	1.728	1.945	0.905	0.000	0.000	0.000	0.000	0.000	0.000	0.000	0.000	0.000	0.000	0.000	0.000	0.000	0.000	80	546	14102	11963	0.924	Error	Error	9235	4867	0	0	7981	3982	0	0	0	0
1	8	4	""	"YHL010C"	3430	14610	110	11278	9507	4698	87	409	1493	90	83	0	7208	6309	3167	276	545	1169	85	77	0	0	0	0	0	0	0	0	0	0	0	0	0	0	0	0	0	0	0	1.614	1.561	1.585	1.628	1.398	1.521	0.903	0.000	0.000	0.000	0.000	0.000	0.000	0.000	0.000	0.000	0.000	0.000	0.000	0.000	0.000	80	535	18123	15453	0.691	Error	Error	11191	6932	0	0	9420	6033	0	0	0	0
1	9	4	""	"YHL042W"	3610	14620	100	5391	4874	2577	84	347	1249	85	73	0	4716	4230	2255	280	583	1332	78	72	0	0	0	0	0	0	0	0	0	0	0	0	0	0	0	0	0	0	0	1.196	1.213	1.244	1.398	1.946	1.170	0.905	0.000	0.000	0.000	0.000	0.000	0.000	0.000	0.000	0.000	0.000	0.000	0.000	0.000	0.000	80	479	9743	8740	0.259	Error	Error	5307	4436	0	0	4790	3950	0	0	0	0
1	10	4	""	"YGR278W"	3820	14620	120	9725	8570	3844	85	210	765	98	92	0	9242	7703	3992	277	455	971	87	83	0	0	0	0	0	0	0	0	0	0	0	0	0	0	0	0	0	0	0	1.075	1.143	1.132	1.313	1.674	1.098	0.919	0.000	0.000	0.000	0.000	0.000	0.000	0.000	0.000	0.000	0.000	0.000	0.000	0.000	0.000	120	599	18605	15911	0.105	Error	Error	9640	8965	0	0	8485	7426	0	0	0	0
1	11	4	""	"YHL012W"	3990	14620	110	11515	9644	4304	90	370	1627	92	86	0	22354	19065	8149	285	966	3615	93	82	0	0	0	0	0	0	0	0	0	0	0	0	0	0	0	0	0	0	0	0.518	0.509	0.518	0.505	1.295	0.497	0.917	0.000	0.000	0.000	0.000	0.000	0.000	0.000	0.000	0.000	0.000	0.000	0.000	0.000	0.000	80	492	33494	28334	-0.950	Error	Error	11425	22069	0	0	9554	18780	0	0	0	0
1	12	4	""	"YHL044W"	4180	14620	110	8683	7071	3787	95	575	2029	78	73	0	11053	9180	4953	293	1279	3954	73	71	0	0	0	0	0	0	0	0	0	0	0	0	0	0	0	0	0	0	0	0.798	0.785	0.781	0.838	1.805	0.736	0.871	0.000	0.000	0.000	0.000	0.000	0.000	0.000	0.000	0.000	0.000	0.000	0.000	0.000	0.000	80	548	19348	15863	-0.325	Error	Error	8588	10760	0	0	6976	8887	0	0	0	0
1	13	4	""	"YGR280C"	4380	14620	110	6569	5555	2941	94	413	1513	80	75	0	4987	4442	2368	296	785	2220	76	61	0	0	0	0	0	0	0	0	0	0	0	0	0	0	0	0	0	0	0	1.380	1.317	1.321	1.319	1.531	1.297	0.916	0.000	0.000	0.000	0.000	0.000	0.000	0.000	0.000	0.000	0.000	0.000	0.000	0.000	0.000	80	528	11166	9607	0.465	Error	Error	6475	4691	0	0	5461	4146	0	0	0	0
1	14	4	"YLF2"	"YHL014C"	4560	14620	110	7936	6673	3116	96	415	1402	90	78	0	26784	23215	10173	305	1453	5317	88	85	0	0	0	0	0	0	0	0	0	0	0	0	0	0	0	0	0	0	0	0.296	0.287	0.289	0.278	1.458	0.276	0.929	0.000	0.000	0.000	0.000	0.000	0.000	0.000	0.000	0.000	0.000	0.000	0.000	0.000	0.000	80	526	34319	29487	-1.756	Error	Error	7840	26479	0	0	6577	22910	0	0	0	0
1	15	4	""	"YHL046C"	4750	14620	100	28869	24344	12109	106	1139	4479	88	81	0	35952	30735	15710	319	2839	8859	81	75	0	0	0	0	0	0	0	0	0	0	0	0	0	0	0	0	0	0	0	0.807	0.797	0.780	0.781	1.410	0.745	0.920	0.000	0.000	0.000	0.000	0.000	0.000	0.000	0.000	0.000	0.000	0.000	0.000	0.000	0.000	80	482	64396	54654	-0.309	Error	Error	28763	35633	0	0	24238	30416	0	0	0	0
1	16	4	"BGL2"	"YGR282C"	4940	14620	110	6281	5131	2435	100	936	4156	71	0	0	10234	8704	3794	292	1895	6992	70	0	0	0	0	0	0	0	0	0	0	0	0	0	0	0	0	0	0	0	0	0.622	0.598	0.597	0.560	1.353	0.501	0.885	0.000	0.000	0.000	0.000	0.000	0.000	0.000	0.000	0.000	0.000	0.000	0.000	0.000	0.000	80	538	16123	13443	-0.686	Error	Error	6181	9942	0	0	5031	8412	0	0	0	0
1	17	4	"dur3"	"YHL016C"	5130	14620	110	9840	8965	4158	91	391	1329	93	85	0	21872	19003	8570	286	1123	3507	91	85	0	0	0	0	0	0	0	0	0	0	0	0	0	0	0	0	0	0	0	0.452	0.474	0.478	0.467	1.348	0.451	0.912	0.000	0.000	0.000	0.000	0.000	0.000	0.000	0.000	0.000	0.000	0.000	0.000	0.000	0.000	80	538	31335	27591	-1.147	Error	Error	9749	21586	0	0	8874	18717	0	0	0	0
1	18	4	"COS8"	"YHL048W"	5330	14620	110	25917	21806	12686	98	396	1620	86	81	0	25938	21871	12262	300	1120	4026	77	76	0	0	0	0	0	0	0	0	0	0	0	0	0	0	0	0	0	0	0	1.007	1.006	1.019	1.047	1.595	1.000	0.911	0.000	0.000	0.000	0.000	0.000	0.000	0.000	0.000	0.000	0.000	0.000	0.000	0.000	0.000	80	528	51457	43279	0.010	Error	Error	25819	25638	0	0	21708	21571	0	0	0	0
1	19	4	"THS1"	"YIL078W"	5510	14620	110	9299	8103	4042	98	444	1730	85	77	0	11032	10070	5049	284	957	3247	82	75	0	0	0	0	0	0	0	0	0	0	0	0	0	0	0	0	0	0	0	0.856	0.818	0.851	0.871	1.759	0.750	0.867	0.000	0.000	0.000	0.000	0.000	0.000	0.000	0.000	0.000	0.000	0.000	0.000	0.000	0.000	80	526	19949	17791	-0.224	Error	Error	9201	10748	0	0	8005	9786	0	0	0	0
1	20	4	""	"YIL110W"	5710	14620	110	10155	8197	3900	101	465	1601	86	80	0	25469	21700	10143	288	1243	4155	86	78	0	0	0	0	0	0	0	0	0	0	0	0	0	0	0	0	0	0	0	0.399	0.378	0.396	0.375	1.286	0.361	0.915	0.000	0.000	0.000	0.000	0.000	0.000	0.000	0.000	0.000	0.000	0.000	0.000	0.000	0.000	80	568	35235	29508	-1.325	Error	Error	10054	25181	0	0	8096	21412	0	0	0	0
1	21	4	"CCT2"	"YIL142W"	5910	14630	110	7010	5905	3119	97	291	1135	85	75	0	5461	4658	2445	286	1018	3880	67	3	0	0	0	0	0	0	0	0	0	0	0	0	0	0	0	0	0	0	0	1.336	1.328	1.360	1.470	1.620	1.321	0.895	0.000	0.000	0.000	0.000	0.000	0.000	0.000	0.000	0.000	0.000	0.000	0.000	0.000	0.000	80	538	12088	10180	0.418	Error	Error	6913	5175	0	0	5808	4372	0	0	0	0
1	22	4	""	"YIL080W"	6090	14620	110	23754	19413	9982	106	562	2814	85	77	0	29679	24981	12054	292	1133	4507	83	80	0	0	0	0	0	0	0	0	0	0	0	0	0	0	0	0	0	0	0	0.805	0.782	0.785	0.738	1.426	0.798	0.931	0.000	0.000	0.000	0.000	0.000	0.000	0.000	0.000	0.000	0.000	0.000	0.000	0.000	0.000	80	520	53035	43996	-0.313	Error	Error	23648	29387	0	0	19307	24689	0	0	0	0
1	1	5	""	"YIL112W"	2100	14810	110	8912	8264	4922	82	314	1292	86	81	0	6817	6644	3786	313	594	1586	82	78	0	0	0	0	0	0	0	0	0	0	0	0	0	0	0	0	0	0	0	1.358	1.292	1.332	1.460	1.910	1.302	0.881	0.000	0.000	0.000	0.000	0.000	0.000	0.000	0.000	0.000	0.000	0.000	0.000	0.000	0.000	80	562	15334	14513	0.441	Error	Error	8830	6504	0	0	8182	6331	0	0	0	0
1	2	5	"TID3"	"YIL144W"	2300	14810	110	9817	8431	4739	99	462	1691	81	76	0	12388	10437	5963	314	825	2109	80	73	0	0	0	0	0	0	0	0	0	0	0	0	0	0	0	0	0	0	0	0.805	0.823	0.827	0.857	1.622	0.802	0.911	0.000	0.000	0.000	0.000	0.000	0.000	0.000	0.000	0.000	0.000	0.000	0.000	0.000	0.000	80	523	21792	18455	-0.313	Error	Error	9718	12074	0	0	8332	10123	0	0	0	0
1	3	5	""	"YIL082W-A"	2490	14820	110	5692	4683	2530	92	286	1259	81	77	0	7215	6238	3645	312	691	1970	76	71	0	0	0	0	0	0	0	0	0	0	0	0	0	0	0	0	0	0	0	0.811	0.775	0.796	0.905	1.992	0.730	0.897	0.000	0.000	0.000	0.000	0.000	0.000	0.000	0.000	0.000	0.000	0.000	0.000	0.000	0.000	80	483	12503	10517	-0.302	Error	Error	5600	6903	0	0	4591	5926	0	0	0	0
1	4	5	"POR2"	"YIL114C"	2680	14820	110	6265	5079	3210	92	184	557	82	77	0	3798	3073	2023	281	438	861	70	65	0	0	0	0	0	0	0	0	0	0	0	0	0	0	0	0	0	0	0	1.755	1.786	1.793	2.138	2.020	1.707	0.885	0.000	0.000	0.000	0.000	0.000	0.000	0.000	0.000	0.000	0.000	0.000	0.000	0.000	0.000	80	470	9690	7779	0.812	Error	Error	6173	3517	0	0	4987	2792	0	0	0	0
1	5	5	"ECM37"	"YIL146C"	2860	14820	110	652	691	421	93	233	889	26	1	0	861	874	540	273	402	735	36	7	0	0	0	0	0	0	0	0	0	0	0	0	0	0	0	0	0	0	0	0.951	0.995	0.987	0.871	2.570	0.929	0.896	0.000	0.000	0.000	0.000	0.000	0.000	0.000	0.000	0.000	0.000	0.000	0.000	0.000	0.000	80	532	1147	1199	-0.073	Error	Error	559	588	0	0	598	601	0	0	0	0
1	6	5	"SDS3"	"YIL084C"	3060	14820	120	8952	7965	4060	91	199	905	90	85	0	5166	4469	2362	277	388	973	85	75	0	0	0	0	0	0	0	0	0	0	0	0	0	0	0	0	0	0	0	1.812	1.878	1.918	2.170	1.792	1.840	0.906	0.000	0.000	0.000	0.000	0.000	0.000	0.000	0.000	0.000	0.000	0.000	0.000	0.000	0.000	120	566	13750	12066	0.858	Error	Error	8861	4889	0	0	7874	4192	0	0	0	0
1	7	5	"his5"	"YIL116W"	3240	14810	110	7740	6262	3214	90	258	989	87	80	0	11526	9393	5020	274	563	1766	86	78	0	0	0	0	0	0	0	0	0	0	0	0	0	0	0	0	0	0	0	0.680	0.677	0.681	0.744	1.668	0.635	0.911	0.000	0.000	0.000	0.000	0.000	0.000	0.000	0.000	0.000	0.000	0.000	0.000	0.000	0.000	80	505	18902	15291	-0.557	Error	Error	7650	11252	0	0	6172	9119	0	0	0	0
1	8	5	"RPL40A"	"YIL148W"	3420	14820	110	8025	6918	4135	85	311	1119	83	76	0	8244	7021	4226	278	736	2108	73	71	0	0	0	0	0	0	0	0	0	0	0	0	0	0	0	0	0	0	0	0.997	1.013	1.027	1.075	1.718	0.918	0.864	0.000	0.000	0.000	0.000	0.000	0.000	0.000	0.000	0.000	0.000	0.000	0.000	0.000	0.000	80	525	15906	13576	-0.005	Error	Error	7940	7966	0	0	6833	6743	0	0	0	0
1	9	5	"ilv3"	"YJR016C"	3610	14810	110	4546	4025	1972	86	227	789	88	80	0	10350	9273	4328	263	603	1595	90	81	0	0	0	0	0	0	0	0	0	0	0	0	0	0	0	0	0	0	0	0.442	0.437	0.448	0.428	1.303	0.418	0.914	0.000	0.000	0.000	0.000	0.000	0.000	0.000	0.000	0.000	0.000	0.000	0.000	0.000	0.000	80	499	14547	12949	-1.177	Error	Error	4460	10087	0	0	3939	9010	0	0	0	0
1	10	5	"cyc1"	"YJR048W"	3790	14810	110	2718	2348	1005	93	182	457	90	80	0	3989	3394	1612	274	527	1154	78	75	0	0	0	0	0	0	0	0	0	0	0	0	0	0	0	0	0	0	0	0.707	0.723	0.732	0.791	1.500	0.644	0.841	0.000	0.000	0.000	0.000	0.000	0.000	0.000	0.000	0.000	0.000	0.000	0.000	0.000	0.000	80	483	6340	5375	-0.501	Error	Error	2625	3715	0	0	2255	3120	0	0	0	0
1	11	5	""	"YJR080C"	3980	14810	110	7236	6705	3318	95	346	1230	91	80	0	5996	5414	2715	302	674	1743	78	76	0	0	0	0	0	0	0	0	0	0	0	0	0	0	0	0	0	0	0	1.254	1.293	1.340	1.478	1.709	1.263	0.910	0.000	0.000	0.000	0.000	0.000	0.000	0.000	0.000	0.000	0.000	0.000	0.000	0.000	0.000	80	510	12835	11722	0.327	Error	Error	7141	5694	0	0	6610	5112	0	0	0	0
1	12	5	""	"YJR018W"	4170	14810	110	3165	2706	1416	95	322	1190	75	70	0	2874	2695	1443	294	585	1326	76	47	0	0	0	0	0	0	0	0	0	0	0	0	0	0	0	0	0	0	0	1.190	1.087	1.103	1.163	1.566	1.038	0.878	0.000	0.000	0.000	0.000	0.000	0.000	0.000	0.000	0.000	0.000	0.000	0.000	0.000	0.000	80	498	5650	5012	0.251	Error	Error	3070	2580	0	0	2611	2401	0	0	0	0
1	13	5	"ISY1"	"YJR050W"	4350	14810	110	4852	4441	2214	96	252	768	87	81	0	3363	3000	1633	294	466	727	78	76	0	0	0	0	0	0	0	0	0	0	0	0	0	0	0	0	0	0	0	1.550	1.606	1.618	1.769	1.719	1.526	0.870	0.000	0.000	0.000	0.000	0.000	0.000	0.000	0.000	0.000	0.000	0.000	0.000	0.000	0.000	80	501	7825	7051	0.632	Error	Error	4756	3069	0	0	4345	2706	0	0	0	0
1	14	5	""	"YJR083C"	4540	14810	110	8273	7329	4018	100	475	1580	81	76	0	4848	4371	2302	311	638	1361	80	75	0	0	0	0	0	0	0	0	0	0	0	0	0	0	0	0	0	0	0	1.801	1.781	1.754	1.930	1.786	1.754	0.896	0.000	0.000	0.000	0.000	0.000	0.000	0.000	0.000	0.000	0.000	0.000	0.000	0.000	0.000	80	510	12710	11289	0.849	Error	Error	8173	4537	0	0	7229	4060	0	0	0	0
1	15	5	""	"YJR020W"	4730	14810	110	4331	3611	1586	103	527	1586	82	72	0	3872	3384	1645	320	703	1300	81	68	0	0	0	0	0	0	0	0	0	0	0	0	0	0	0	0	0	0	0	1.190	1.145	1.121	1.234	1.773	1.051	0.890	0.000	0.000	0.000	0.000	0.000	0.000	0.000	0.000	0.000	0.000	0.000	0.000	0.000	0.000	80	521	7780	6572	0.251	Error	Error	4228	3552	0	0	3508	3064	0	0	0	0
1	16	5	"rad7"	"YJR052W"	4930	14810	110	6566	6046	2934	99	370	1046	90	82	0	4805	4351	1987	289	640	1260	85	76	0	0	0	0	0	0	0	0	0	0	0	0	0	0	0	0	0	0	0	1.432	1.464	1.474	1.465	1.479	1.473	0.885	0.000	0.000	0.000	0.000	0.000	0.000	0.000	0.000	0.000	0.000	0.000	0.000	0.000	0.000	80	520	10983	10009	0.518	Error	Error	6467	4516	0	0	5947	4062	0	0	0	0
1	17	5	""	"YJR085C"	5120	14810	110	3120	2532	1288	91	235	806	81	73	0	2622	2252	1126	266	510	1465	71	15	0	0	0	0	0	0	0	0	0	0	0	0	0	0	0	0	0	0	0	1.286	1.229	1.257	1.153	2.005	1.159	0.873	0.000	0.000	0.000	0.000	0.000	0.000	0.000	0.000	0.000	0.000	0.000	0.000	0.000	0.000	80	504	5385	4427	0.363	Error	Error	3029	2356	0	0	2441	1986	0	0	0	0
1	18	5	"LSM8"	"YJR022W"	5300	14810	110	3381	2912	1182	95	255	705	90	78	0	3365	2974	1352	287	510	929	81	76	0	0	0	0	0	0	0	0	0	0	0	0	0	0	0	0	0	0	0	1.068	1.048	1.055	1.178	1.723	0.976	0.899	0.000	0.000	0.000	0.000	0.000	0.000	0.000	0.000	0.000	0.000	0.000	0.000	0.000	0.000	80	501	6364	5504	0.094	Error	Error	3286	3078	0	0	2817	2687	0	0	0	0
1	19	5	""	"YJR054W"	5490	14810	110	10952	9658	4281	101	556	1636	91	83	0	9807	8640	4155	290	819	1954	85	78	0	0	0	0	0	0	0	0	0	0	0	0	0	0	0	0	0	0	0	1.140	1.145	1.151	1.291	1.523	1.089	0.914	0.000	0.000	0.000	0.000	0.000	0.000	0.000	0.000	0.000	0.000	0.000	0.000	0.000	0.000	80	554	20368	17907	0.189	Error	Error	10851	9517	0	0	9557	8350	0	0	0	0
1	20	5	""	"YJR087W"	5710	14820	110	4175	3412	1765	96	481	1547	75	65	0	3170	2621	1386	278	716	2108	66	2	0	0	0	0	0	0	0	0	0	0	0	0	0	0	0	0	0	0	0	1.410	1.415	1.399	1.591	2.051	1.358	0.867	0.000	0.000	0.000	0.000	0.000	0.000	0.000	0.000	0.000	0.000	0.000	0.000	0.000	0.000	80	494	6971	5659	0.496	Error	Error	4079	2892	0	0	3316	2343	0	0	0	0
1	21	5	"RSC4"	"YKR008W"	5870	14810	110	8125	7486	3360	91	275	1013	96	90	0	20413	19490	8482	274	976	3624	93	87	0	0	0	0	0	0	0	0	0	0	0	0	0	0	0	0	0	0	0	0.399	0.385	0.390	0.376	1.424	0.367	0.921	0.000	0.000	0.000	0.000	0.000	0.000	0.000	0.000	0.000	0.000	0.000	0.000	0.000	0.000	80	473	28173	26611	-1.326	Error	Error	8034	20139	0	0	7395	19216	0	0	0	0
1	22	5	"gap1"	"YKR039W"	6080	14810	120	8141	7210	3208	95	355	1737	92	81	0	9180	8205	3449	273	984	3823	82	67	0	0	0	0	0	0	0	0	0	0	0	0	0	0	0	0	0	0	0	0.903	0.897	0.904	0.891	1.501	0.902	0.926	0.000	0.000	0.000	0.000	0.000	0.000	0.000	0.000	0.000	0.000	0.000	0.000	0.000	0.000	120	647	16953	15047	-0.147	Error	Error	8046	8907	0	0	7115	7932	0	0	0	0
1	1	6	""	"YKR071C"	2100	15010	110	10352	8391	4877	84	394	1495	86	76	0	21261	18255	11463	318	795	2927	81	75	0	0	0	0	0	0	0	0	0	0	0	0	0	0	0	0	0	0	0	0.490	0.463	0.457	0.497	1.715	0.433	0.914	0.000	0.000	0.000	0.000	0.000	0.000	0.000	0.000	0.000	0.000	0.000	0.000	0.000	0.000	80	493	31211	26244	-1.028	Error	Error	10268	20943	0	0	8307	17937	0	0	0	0
1	2	6	"TOF2"	"YKR010C"	2270	15000	120	7922	7686	3402	94	141	545	98	94	0	18759	17138	7857	314	418	900	95	93	0	0	0	0	0	0	0	0	0	0	0	0	0	0	0	0	0	0	0	0.424	0.451	0.454	0.503	1.803	0.438	0.925	0.000	0.000	0.000	0.000	0.000	0.000	0.000	0.000	0.000	0.000	0.000	0.000	0.000	0.000	120	517	26273	24416	-1.237	Error	Error	7828	18445	0	0	7592	16824	0	0	0	0
1	3	6	""	"YKR041W"	2460	15000	120	3634	3098	1566	83	244	1092	82	70	0	2766	2432	1320	287	453	1124	75	58	0	0	0	0	0	0	0	0	0	0	0	0	0	0	0	0	0	0	0	1.432	1.406	1.392	1.622	2.043	1.352	0.871	0.000	0.000	0.000	0.000	0.000	0.000	0.000	0.000	0.000	0.000	0.000	0.000	0.000	0.000	120	513	6030	5160	0.518	Error	Error	3551	2479	0	0	3015	2145	0	0	0	0
1	4	6	""	"YKR073C"	2640	14990	150	143	207	181	81	287	1015	0	0	0	329	431	350	271	471	1009	4	0	0	0	0	0	0	0	0	0	0	0	0	0	0	0	0	0	0	0	0	1.069	0.788	0.552	0.638	2.986	1.110	0.801	0.000	0.000	0.000	0.000	0.000	0.000	0.000	0.000	0.000	0.000	0.000	0.000	0.000	0.000	156	691	120	286	0.096	Error	Error	62	58	0	0	126	160	0	0	-50	0
1	5	6	""	"YKR012C"	2850	15010	110	4710	3573	2680	78	202	645	70	65	0	3694	3128	2434	258	345	555	66	62	0	0	0	0	0	0	0	0	0	0	0	0	0	0	0	0	0	0	0	1.348	1.218	1.158	1.196	2.634	1.124	0.894	0.000	0.000	0.000	0.000	0.000	0.000	0.000	0.000	0.000	0.000	0.000	0.000	0.000	0.000	80	478	8068	6365	0.431	Error	Error	4632	3436	0	0	3495	2870	0	0	0	0
1	6	6	""	"YKR043C"	3030	15000	120	9460	8138	5027	86	234	874	87	81	0	22129	17960	11038	268	367	695	91	85	0	0	0	0	0	0	0	0	0	0	0	0	0	0	0	0	0	0	0	0.429	0.455	0.447	0.489	1.845	0.440	0.910	0.000	0.000	0.000	0.000	0.000	0.000	0.000	0.000	0.000	0.000	0.000	0.000	0.000	0.000	120	494	31235	25744	-1.222	Error	Error	9374	21861	0	0	8052	17692	0	0	0	0
1	7	6	""	"YKR075C"	3230	15010	110	6497	5660	4286	87	253	898	76	71	0	5459	5070	3764	278	409	860	73	68	0	0	0	0	0	0	0	0	0	0	0	0	0	0	0	0	0	0	0	1.237	1.163	1.174	1.230	2.018	1.136	0.890	0.000	0.000	0.000	0.000	0.000	0.000	0.000	0.000	0.000	0.000	0.000	0.000	0.000	0.000	80	483	11591	10365	0.307	Error	Error	6410	5181	0	0	5573	4792	0	0	0	0
1	8	6	"YPT52"	"YKR014C"	3390	15000	110	7548	6315	3057	88	282	1007	88	82	0	7311	6246	3280	281	562	1345	82	75	0	0	0	0	0	0	0	0	0	0	0	0	0	0	0	0	0	0	0	1.061	1.044	1.052	1.183	1.637	0.968	0.912	0.000	0.000	0.000	0.000	0.000	0.000	0.000	0.000	0.000	0.000	0.000	0.000	0.000	0.000	80	491	14490	12192	0.086	Error	Error	7460	7030	0	0	6227	5965	0	0	0	0
1	9	6	""	"YKR045C"	3600	15000	120	7742	6654	3511	90	269	952	90	80	0	12361	10149	5799	281	569	1407	88	79	0	0	0	0	0	0	0	0	0	0	0	0	0	0	0	0	0	0	0	0.633	0.665	0.656	0.749	1.855	0.636	0.936	0.000	0.000	0.000	0.000	0.000	0.000	0.000	0.000	0.000	0.000	0.000	0.000	0.000	0.000	120	589	19732	16432	-0.659	Error	Error	7652	12080	0	0	6564	9868	0	0	0	0
1	10	6	""	"YKR077W"	3790	15000	120	11251	10494	5570	92	115	219	99	99	0	7831	6988	3941	275	323	386	92	89	0	0	0	0	0	0	0	0	0	0	0	0	0	0	0	0	0	0	0	1.477	1.550	1.495	1.762	1.840	1.529	0.896	0.000	0.000	0.000	0.000	0.000	0.000	0.000	0.000	0.000	0.000	0.000	0.000	0.000	0.000	120	542	18715	17115	0.563	Error	Error	11159	7556	0	0	10402	6713	0	0	0	0
1	11	6	"FRE1"	"YLR214W"	3980	15000	120	9735	8773	3938	93	179	781	96	90	0	12495	10824	5277	282	391	901	89	86	0	0	0	0	0	0	0	0	0	0	0	0	0	0	0	0	0	0	0	0.789	0.823	0.837	0.934	1.682	0.785	0.907	0.000	0.000	0.000	0.000	0.000	0.000	0.000	0.000	0.000	0.000	0.000	0.000	0.000	0.000	120	541	21855	19222	-0.341	Error	Error	9642	12213	0	0	8680	10542	0	0	0	0
1	12	6	"MAP1"	"YLR244C"	4170	15000	120	7398	6226	3085	93	145	750	90	85	0	11307	9669	4909	289	411	1867	85	80	0	0	0	0	0	0	0	0	0	0	0	0	0	0	0	0	0	0	0	0.663	0.654	0.660	0.700	1.728	0.633	0.920	0.000	0.000	0.000	0.000	0.000	0.000	0.000	0.000	0.000	0.000	0.000	0.000	0.000	0.000	120	540	18323	15513	-0.593	Error	Error	7305	11018	0	0	6133	9380	0	0	0	0
1	13	6	"CDC46"	"YLR274W"	4360	15000	120	6273	6241	4313	93	142	465	94	90	0	8395	8154	5135	286	343	398	91	90	0	0	0	0	0	0	0	0	0	0	0	0	0	0	0	0	0	0	0	0.762	0.781	0.749	0.926	1.985	0.791	0.872	0.000	0.000	0.000	0.000	0.000	0.000	0.000	0.000	0.000	0.000	0.000	0.000	0.000	0.000	120	527	14289	14016	-0.392	Error	Error	6180	8109	0	0	6148	7868	0	0	0	0
1	14	6	"CPR6"	"YLR216C"	4540	15000	120	9140	7822	3699	93	195	942	93	90	0	6093	5495	2648	289	372	699	91	89	0	0	0	0	0	0	0	0	0	0	0	0	0	0	0	0	0	0	0	1.559	1.485	1.471	1.532	1.531	1.471	0.919	0.000	0.000	0.000	0.000	0.000	0.000	0.000	0.000	0.000	0.000	0.000	0.000	0.000	0.000	120	540	14851	12935	0.640	Error	Error	9047	5804	0	0	7729	5206	0	0	0	0
1	15	6	"ERF2"	"YLR246W"	4740	15000	120	3641	3249	1675	92	151	444	88	81	0	5995	5275	2875	286	354	467	87	85	0	0	0	0	0	0	0	0	0	0	0	0	0	0	0	0	0	0	0	0.622	0.633	0.635	0.709	2.009	0.609	0.882	0.000	0.000	0.000	0.000	0.000	0.000	0.000	0.000	0.000	0.000	0.000	0.000	0.000	0.000	120	557	9258	8146	-0.686	Error	Error	3549	5709	0	0	3157	4989	0	0	0	0
1	16	6	"DBP9"	"YLR276C"	4930	15000	120	10283	8975	4770	89	120	293	97	92	0	36816	31146	17744	276	328	407	97	95	0	0	0	0	0	0	0	0	0	0	0	0	0	0	0	0	0	0	0	0.279	0.288	0.297	0.320	1.706	0.274	0.916	0.000	0.000	0.000	0.000	0.000	0.000	0.000	0.000	0.000	0.000	0.000	0.000	0.000	0.000	120	548	46734	39756	-1.842	Error	Error	10194	36540	0	0	8886	30870	0	0	0	0
1	17	6	""	"YLR218C"	5110	14990	110	5122	4192	2200	89	131	282	88	83	0	3559	3023	1537	261	330	406	81	80	0	0	0	0	0	0	0	0	0	0	0	0	0	0	0	0	0	0	0	1.526	1.486	1.516	1.564	1.983	1.498	0.902	0.000	0.000	0.000	0.000	0.000	0.000	0.000	0.000	0.000	0.000	0.000	0.000	0.000	0.000	80	493	8331	6865	0.610	Error	Error	5033	3298	0	0	4103	2762	0	0	0	0
1	18	6	"RCK2"	"YLR248W"	5310	15000	120	8818	8628	3727	86	159	412	99	98	0	3963	3702	1656	264	362	530	90	85	0	0	0	0	0	0	0	0	0	0	0	0	0	0	0	0	0	0	0	2.361	2.485	2.432	2.652	1.675	2.491	0.902	0.000	0.000	0.000	0.000	0.000	0.000	0.000	0.000	0.000	0.000	0.000	0.000	0.000	0.000	120	569	12431	11980	1.239	Error	Error	8732	3699	0	0	8542	3438	0	0	0	0
1	19	6	""	"YLR278C"	5480	15000	110	813	1003	678	91	181	681	57	20	0	875	1042	703	271	380	731	47	17	0	0	0	0	0	0	0	0	0	0	0	0	0	0	0	0	0	0	0	1.195	1.183	1.101	1.090	2.449	1.006	0.783	0.000	0.000	0.000	0.000	0.000	0.000	0.000	0.000	0.000	0.000	0.000	0.000	0.000	0.000	80	504	1326	1683	0.257	Error	Error	722	604	0	0	912	771	0	0	0	0
1	20	6	"CCC1"	"YLR220W"	5700	15000	120	6682	6131	2818	92	151	331	97	91	0	13719	11839	5712	270	331	294	97	95	0	0	0	0	0	0	0	0	0	0	0	0	0	0	0	0	0	0	0	0.490	0.522	0.527	0.563	1.745	0.496	0.912	0.000	0.000	0.000	0.000	0.000	0.000	0.000	0.000	0.000	0.000	0.000	0.000	0.000	0.000	120	584	20039	17608	-1.029	Error	Error	6590	13449	0	0	6039	11569	0	0	0	0
1	21	6	"SSP120"	"YLR250W"	5890	15000	120	5402	4719	2367	82	144	628	90	83	0	6946	6076	3297	259	523	2424	76	68	0	0	0	0	0	0	0	0	0	0	0	0	0	0	0	0	0	0	0	0.796	0.797	0.792	0.926	2.190	0.749	0.910	0.000	0.000	0.000	0.000	0.000	0.000	0.000	0.000	0.000	0.000	0.000	0.000	0.000	0.000	120	543	12007	10454	-0.330	Error	Error	5320	6687	0	0	4637	5817	0	0	0	0
1	22	6	""	"YLR280C"	6080	15000	120	766	799	474	83	86	55	94	88	0	927	994	545	252	260	81	87	83	0	0	0	0	0	0	0	0	0	0	0	0	0	0	0	0	0	0	0	1.012	0.965	0.938	0.971	2.022	0.885	0.793	0.000	0.000	0.000	0.000	0.000	0.000	0.000	0.000	0.000	0.000	0.000	0.000	0.000	0.000	120	596	1358	1458	0.017	Error	Error	683	675	0	0	716	742	0	0	0	0
1	1	7	"CTK3"	"YML112W"	2090	15190	120	11890	9650	6317	79	112	458	90	85	0	5678	4734	3204	301	343	757	72	70	0	0	0	0	0	0	0	0	0	0	0	0	0	0	0	0	0	0	0	2.197	2.159	2.171	2.514	2.189	2.121	0.913	0.000	0.000	0.000	0.000	0.000	0.000	0.000	0.000	0.000	0.000	0.000	0.000	0.000	0.000	120	621	17188	14004	1.135	Error	Error	11811	5377	0	0	9571	4433	0	0	0	0
1	2	7	""	"YMR010W"	2280	15190	120	9077	7676	4623	89	309	1282	83	76	0	9297	7821	5139	300	423	847	83	75	0	0	0	0	0	0	0	0	0	0	0	0	0	0	0	0	0	0	0	0.999	1.009	1.027	1.242	2.229	0.932	0.908	0.000	0.000	0.000	0.000	0.000	0.000	0.000	0.000	0.000	0.000	0.000	0.000	0.000	0.000	120	568	17985	15108	-0.001	Error	Error	8988	8997	0	0	7587	7521	0	0	0	0
1	3	7	""	"YMR041C"	2490	15200	110	9574	7520	4916	83	343	1376	80	72	0	6495	5339	3502	276	417	916	73	70	0	0	0	0	0	0	0	0	0	0	0	0	0	0	0	0	0	0	0	1.526	1.469	1.535	1.746	2.119	1.406	0.883	0.000	0.000	0.000	0.000	0.000	0.000	0.000	0.000	0.000	0.000	0.000	0.000	0.000	0.000	80	495	15710	12500	0.610	Error	Error	9491	6219	0	0	7437	5063	0	0	0	0
1	4	7	""	"YML114C"	2650	15190	110	8770	7679	3988	81	404	1576	85	78	0	5389	4921	2781	258	529	1237	78	76	0	0	0	0	0	0	0	0	0	0	0	0	0	0	0	0	0	0	0	1.693	1.629	1.649	1.832	1.776	1.562	0.909	0.000	0.000	0.000	0.000	0.000	0.000	0.000	0.000	0.000	0.000	0.000	0.000	0.000	0.000	80	482	13820	12261	0.760	Error	Error	8689	5131	0	0	7598	4663	0	0	0	0
1	5	7	"CLU1"	"YMR012W"	2850	15190	110	537	482	264	81	417	1573	0	0	0	1002	926	543	262	549	1232	17	0	0	0	0	0	0	0	0	0	0	0	0	0	0	0	0	0	0	0	0	0.616	0.604	0.533	0.511	1.967	0.469	0.728	0.000	0.000	0.000	0.000	0.000	0.000	0.000	0.000	0.000	0.000	0.000	0.000	0.000	0.000	80	459	1196	1065	-0.698	Error	Error	456	740	0	0	401	664	0	0	0	0
1	6	7	"mcm1"	"YMR043W"	3020	15180	150	95	129	109	83	144	461	0	0	0	307	368	256	272	314	333	12	5	0	0	0	0	0	0	0	0	0	0	0	0	0	0	0	0	0	0	0	0.343	0.479	0.367	0.383	3.127	0.413	0.566	0.000	0.000	0.000	0.000	0.000	0.000	0.000	0.000	0.000	0.000	0.000	0.000	0.000	0.000	156	704	47	142	-1.544	Error	Error	12	35	0	0	46	96	0	0	-50	0
1	7	7	"atr1"	"YML116W"	3230	15190	110	8496	7290	3855	87	210	862	92	85	0	18293	16281	8057	293	690	2431	95	86	0	0	0	0	0	0	0	0	0	0	0	0	0	0	0	0	0	0	0	0.467	0.451	0.456	0.424	1.456	0.442	0.921	0.000	0.000	0.000	0.000	0.000	0.000	0.000	0.000	0.000	0.000	0.000	0.000	0.000	0.000	80	522	26409	23191	-1.098	Error	Error	8409	18000	0	0	7203	15988	0	0	0	0
1	8	7	""	"YMR014W"	3430	15190	110	5105	5183	3326	91	278	987	80	75	0	14372	14108	8950	294	894	2789	83	73	0	0	0	0	0	0	0	0	0	0	0	0	0	0	0	0	0	0	0	0.356	0.369	0.373	0.344	1.767	0.348	0.908	0.000	0.000	0.000	0.000	0.000	0.000	0.000	0.000	0.000	0.000	0.000	0.000	0.000	0.000	80	552	19092	18906	-1.489	Error	Error	5014	14078	0	0	5092	13814	0	0	0	0
1	9	7	""	"YMR045C"	3620	15190	110	19897	18862	10933	93	308	1585	88	85	0	32622	30602	16896	295	1024	4543	85	80	1	0	0	0	0	0	0	0	0	0	0	0	0	0	0	0	0	0	0	0.613	0.619	0.607	0.609	1.472	0.596	0.905	0.000	0.000	0.000	0.000	0.000	0.000	0.000	0.000	0.000	0.000	0.000	0.000	0.000	0.000	80	512	52131	49076	-0.707	Error	Error	19804	32327	0	0	18769	30307	0	0	0	0
1	10	7	""	"YML117W-A"	3810	15190	110	4077	3636	2059	97	306	1594	76	66	0	5267	4758	2809	294	903	4351	60	3	0	0	0	0	0	0	0	0	0	0	0	0	0	0	0	0	0	0	0	0.800	0.793	0.818	0.880	2.083	0.743	0.895	0.000	0.000	0.000	0.000	0.000	0.000	0.000	0.000	0.000	0.000	0.000	0.000	0.000	0.000	80	500	8953	8003	-0.321	Error	Error	3980	4973	0	0	3539	4464	0	0	0	0
1	11	7	"SOK2"	"YMR016C"	3990	15190	110	11421	10254	4601	108	416	1581	93	86	0	9982	8554	3960	303	647	1494	87	83	0	0	0	0	0	0	0	0	0	0	0	0	0	0	0	0	0	0	0	1.169	1.230	1.224	1.351	1.517	1.227	0.918	0.000	0.000	0.000	0.000	0.000	0.000	0.000	0.000	0.000	0.000	0.000	0.000	0.000	0.000	80	487	20992	18397	0.225	Error	Error	11313	9679	0	0	10146	8251	0	0	0	0
1	12	7	""	"YMR046W-A"	4170	15190	110	23655	18934	9967	115	1307	4563	81	77	0	34499	27001	15733	316	2230	7417	77	73	0	0	0	0	0	0	0	0	0	0	0	0	0	0	0	0	0	0	0	0.689	0.705	0.720	0.808	1.711	0.654	0.915	0.000	0.000	0.000	0.000	0.000	0.000	0.000	0.000	0.000	0.000	0.000	0.000	0.000	0.000	80	516	57723	45504	-0.538	Error	Error	23540	34183	0	0	18819	26685	0	0	0	0
1	13	7	"PUB1"	"YNL016W"	4380	15190	110	1470	1340	797	100	920	4086	0	0	0	1720	1593	921	299	1829	6999	0	0	0	0	0	0	0	0	0	0	0	0	0	0	0	0	0	0	0	0	0	0.964	0.958	0.916	0.826	1.865	0.879	0.835	0.000	0.000	0.000	0.000	0.000	0.000	0.000	0.000	0.000	0.000	0.000	0.000	0.000	0.000	80	518	2791	2534	-0.053	Error	Error	1370	1421	0	0	1240	1294	0	0	0	0
1	14	7	"ALG11"	"YNL048W"	4560	15190	110	11345	10507	5574	97	349	1592	87	81	0	13942	12123	6234	288	682	2044	85	80	0	0	0	0	0	0	0	0	0	0	0	0	0	0	0	0	0	0	0	0.824	0.880	0.895	0.882	1.567	0.863	0.884	0.000	0.000	0.000	0.000	0.000	0.000	0.000	0.000	0.000	0.000	0.000	0.000	0.000	0.000	80	510	24902	22245	-0.280	Error	Error	11248	13654	0	0	10410	11835	0	0	0	0
1	15	7	"TPM1"	"YNL079C"	4760	15190	110	5130	4524	2534	101	371	1526	77	72	0	3790	3243	1831	289	668	1856	73	45	0	0	0	0	0	0	0	0	0	0	0	0	0	0	0	0	0	0	0	1.436	1.497	1.484	1.547	1.540	1.504	0.896	0.000	0.000	0.000	0.000	0.000	0.000	0.000	0.000	0.000	0.000	0.000	0.000	0.000	0.000	80	521	8530	7377	0.523	Error	Error	5029	3501	0	0	4423	2954	0	0	0	0
1	16	7	""	"YNL018C"	4940	15190	110	14649	13035	6769	97	445	1836	85	82	0	14561	12450	6180	281	732	2239	85	81	0	0	0	0	0	0	0	0	0	0	0	0	0	0	0	0	0	0	0	1.019	1.063	1.068	1.061	1.440	1.059	0.914	0.000	0.000	0.000	0.000	0.000	0.000	0.000	0.000	0.000	0.000	0.000	0.000	0.000	0.000	80	509	28832	25107	0.027	Error	Error	14552	14280	0	0	12938	12169	0	0	0	0
1	17	7	""	"YNL050C"	5140	15190	110	4572	4284	2243	88	370	1605	81	70	0	16333	14050	6702	268	833	2630	88	83	0	0	0	0	0	0	0	0	0	0	0	0	0	0	0	0	0	0	0	0.279	0.304	0.303	0.287	1.450	0.289	0.922	0.000	0.000	0.000	0.000	0.000	0.000	0.000	0.000	0.000	0.000	0.000	0.000	0.000	0.000	80	550	20549	17978	-1.841	Error	Error	4484	16065	0	0	4196	13782	0	0	0	0
1	18	7	""	"YNL081C"	5330	15190	110	3857	3353	1774	91	211	627	85	80	0	16221	13603	7341	275	936	3231	80	77	0	0	0	0	0	0	0	0	0	0	0	0	0	0	0	0	0	0	0	0.236	0.245	0.246	0.253	1.674	0.231	0.911	0.000	0.000	0.000	0.000	0.000	0.000	0.000	0.000	0.000	0.000	0.000	0.000	0.000	0.000	80	512	19712	16590	-2.082	Error	Error	3766	15946	0	0	3262	13328	0	0	0	0
1	19	7	"ARK1"	"YNL020C"	5520	15190	110	9387	7824	4271	92	303	1100	86	80	0	13303	10979	5761	271	916	3035	80	73	0	0	0	0	0	0	0	0	0	0	0	0	0	0	0	0	0	0	0	0.713	0.722	0.714	0.723	1.552	0.721	0.905	0.000	0.000	0.000	0.000	0.000	0.000	0.000	0.000	0.000	0.000	0.000	0.000	0.000	0.000	80	532	22327	18440	-0.488	Error	Error	9295	13032	0	0	7732	10708	0	0	0	0
1	20	7	"COX5A"	"YNL052W"	5710	15190	110	3656	3177	1640	92	286	1088	81	72	0	5250	4581	2371	266	630	1789	78	70	0	0	0	0	0	0	0	0	0	0	0	0	0	0	0	0	0	0	0	0.715	0.715	0.713	0.774	1.734	0.691	0.920	0.000	0.000	0.000	0.000	0.000	0.000	0.000	0.000	0.000	0.000	0.000	0.000	0.000	0.000	80	511	8548	7400	-0.484	Error	Error	3564	4984	0	0	3085	4315	0	0	0	0
1	21	7	""	"YNL083W"	5900	15190	110	9733	8391	4232	86	331	1268	88	81	0	8221	7131	3548	264	563	1361	86	78	0	0	0	0	0	0	0	0	0	0	0	0	0	0	0	0	0	0	0	1.212	1.209	1.221	1.253	1.574	1.220	0.906	0.000	0.000	0.000	0.000	0.000	0.000	0.000	0.000	0.000	0.000	0.000	0.000	0.000	0.000	80	507	17604	15172	0.278	Error	Error	9647	7957	0	0	8305	6867	0	0	0	0
1	22	7	""	"YNL022C"	6100	15200	120	9791	8690	4444	86	239	1090	91	86	0	6401	5487	2876	258	409	1004	88	79	0	0	0	0	0	0	0	0	0	0	0	0	0	0	0	0	0	0	0	1.580	1.645	1.657	1.799	1.708	1.659	0.912	0.000	0.000	0.000	0.000	0.000	0.000	0.000	0.000	0.000	0.000	0.000	0.000	0.000	0.000	120	614	15848	13833	0.660	Error	Error	9705	6143	0	0	8604	5229	0	0	0	0
1	1	8	"VAC7"	"YNL054W"	2100	15390	110	2214	2219	1638	76	128	500	76	72	0	2054	2062	1489	292	335	378	73	68	0	0	0	0	0	0	0	0	0	0	0	0	0	0	0	0	0	0	0	1.213	1.211	1.090	1.121	2.508	1.184	0.836	0.000	0.000	0.000	0.000	0.000	0.000	0.000	0.000	0.000	0.000	0.000	0.000	0.000	0.000	80	556	3900	3913	0.279	Error	Error	2138	1762	0	0	2143	1770	0	0	0	0
1	2	8	"mkt1"	"YNL085W"	2300	15380	110	8600	7985	6294	86	236	980	81	73	0	13807	11964	9181	286	598	2108	76	71	0	0	0	0	0	0	0	0	0	0	0	0	0	0	0	0	0	0	0	0.630	0.676	0.679	0.835	2.076	0.650	0.929	0.000	0.000	0.000	0.000	0.000	0.000	0.000	0.000	0.000	0.000	0.000	0.000	0.000	0.000	80	524	22035	19577	-0.667	Error	Error	8514	13521	0	0	7899	11678	0	0	0	0
1	3	8	"BIO4"	"YNR057C"	2490	15390	110	9535	7677	4758	82	260	1059	80	76	0	7378	5865	3742	263	629	2192	72	66	0	0	0	0	0	0	0	0	0	0	0	0	0	0	0	0	0	0	0	1.329	1.356	1.332	1.476	1.925	1.309	0.909	0.000	0.000	0.000	0.000	0.000	0.000	0.000	0.000	0.000	0.000	0.000	0.000	0.000	0.000	80	506	16568	13197	0.410	Error	Error	9453	7115	0	0	7595	5602	0	0	0	0
1	4	8	"HTA3"	"YOL012C"	2670	15380	110	4646	3719	2166	84	344	1230	76	72	0	3032	2476	1488	259	496	1058	71	67	0	0	0	0	0	0	0	0	0	0	0	0	0	0	0	0	0	0	0	1.645	1.640	1.593	1.546	2.228	1.521	0.849	0.000	0.000	0.000	0.000	0.000	0.000	0.000	0.000	0.000	0.000	0.000	0.000	0.000	0.000	80	523	7335	5852	0.718	Error	Error	4562	2773	0	0	3635	2217	0	0	0	0
1	5	8	"NTG2"	"YOL043C"	2870	15390	120	9434	7924	5627	85	236	768	83	75	0	21531	19652	15851	271	489	1277	77	71	0	0	0	0	0	0	0	0	0	0	0	0	0	0	0	0	0	0	0	0.440	0.404	0.394	0.545	2.911	0.353	0.897	0.000	0.000	0.000	0.000	0.000	0.000	0.000	0.000	0.000	0.000	0.000	0.000	0.000	0.000	120	601	30609	27220	-1.185	Error	Error	9349	21260	0	0	7839	19381	0	0	0	0
1	6	8	""	"YNR059W"	3070	15390	110	8257	7055	4012	87	140	370	90	87	0	8421	7067	4323	284	363	812	81	80	0	0	0	0	0	0	0	0	0	0	0	0	0	0	0	0	0	0	0	1.004	1.027	1.065	1.235	2.125	0.972	0.901	0.000	0.000	0.000	0.000	0.000	0.000	0.000	0.000	0.000	0.000	0.000	0.000	0.000	0.000	80	468	16307	13751	0.006	Error	Error	8170	8137	0	0	6968	6783	0	0	0	0
1	7	8	""	"YOL013W-A"	3230	15380	110	7967	7397	5637	92	394	1607	72	65	0	14229	12195	9950	300	981	3381	65	60	0	0	0	0	0	0	0	0	0	0	0	0	0	0	0	0	0	0	0	0.565	0.614	0.602	0.751	2.291	0.573	0.922	0.000	0.000	0.000	0.000	0.000	0.000	0.000	0.000	0.000	0.000	0.000	0.000	0.000	0.000	80	487	21804	19200	-0.823	Error	Error	7875	13929	0	0	7305	11895	0	0	0	0
1	8	8	""	"YOL045W"	3430	15390	110	1488	1440	966	91	340	1421	48	5	0	1865	1841	1336	288	850	2952	8	1	0	0	0	0	0	0	0	0	0	0	0	0	0	0	0	0	0	0	0	0.886	0.869	0.832	0.896	2.281	0.758	0.825	0.000	0.000	0.000	0.000	0.000	0.000	0.000	0.000	0.000	0.000	0.000	0.000	0.000	0.000	80	517	2974	2902	-0.175	Error	Error	1397	1577	0	0	1349	1553	0	0	0	0
1	9	8	""	"YNR061C"	3620	15380	110	9677	8576	5184	94	248	1216	82	80	0	6351	5519	3243	287	540	2287	75	63	0	0	0	0	0	0	0	0	0	0	0	0	0	0	0	0	0	0	0	1.580	1.621	1.623	1.724	1.654	1.591	0.908	0.000	0.000	0.000	0.000	0.000	0.000	0.000	0.000	0.000	0.000	0.000	0.000	0.000	0.000	80	532	15647	13714	0.660	Error	Error	9583	6064	0	0	8482	5232	0	0	0	0
1	10	8	""	"YOL015W"	3810	15380	110	7137	6565	3941	99	222	729	86	80	0	12893	11726	7227	297	535	1312	81	77	0	0	0	0	0	0	0	0	0	0	0	0	0	0	0	0	0	0	0	0.559	0.566	0.555	0.702	2.350	0.530	0.907	0.000	0.000	0.000	0.000	0.000	0.000	0.000	0.000	0.000	0.000	0.000	0.000	0.000	0.000	80	511	19634	17895	-0.840	Error	Error	7038	12596	0	0	6466	11429	0	0	0	0
1	11	8	""	"YOL047C"	4000	15380	110	5959	5313	2790	110	329	1106	81	77	0	4447	3729	2068	302	597	1367	77	68	0	0	0	0	0	0	0	0	0	0	0	0	0	0	0	0	0	0	0	1.411	1.518	1.477	1.829	1.950	1.499	0.891	0.000	0.000	0.000	0.000	0.000	0.000	0.000	0.000	0.000	0.000	0.000	0.000	0.000	0.000	80	512	9994	8630	0.497	Error	Error	5849	4145	0	0	5203	3427	0	0	0	0
1	12	8	""	"YNR063W"	4190	15380	110	12779	11509	5181	119	626	2456	92	81	0	13997	12512	5560	323	1078	3819	87	75	0	0	0	0	0	0	0	0	0	0	0	0	0	0	0	0	0	0	0	0.926	0.934	0.943	0.931	1.334	0.904	0.926	0.000	0.000	0.000	0.000	0.000	0.000	0.000	0.000	0.000	0.000	0.000	0.000	0.000	0.000	80	512	26334	23579	-0.111	Error	Error	12660	13674	0	0	11390	12189	0	0	0	0
1	13	8	""	"YOL017W"	4380	15380	110	7772	6752	3551	103	339	1259	86	78	0	13041	11089	5928	307	776	2291	83	76	0	0	0	0	0	0	0	0	0	0	0	0	0	0	0	0	0	0	0	0.602	0.617	0.627	0.646	1.408	0.593	0.910	0.000	0.000	0.000	0.000	0.000	0.000	0.000	0.000	0.000	0.000	0.000	0.000	0.000	0.000	80	530	20403	17431	-0.732	Error	Error	7669	12734	0	0	6649	10782	0	0	0	0
1	14	8	"GSH2"	"YOL049W"	4570	15380	110	2061	2215	1855	95	245	984	72	50	0	2924	3273	2557	292	599	1751	72	40	0	0	0	0	0	0	0	0	0	0	0	0	0	0	0	0	0	0	0	0.747	0.711	0.711	0.739	1.856	0.692	0.830	0.000	0.000	0.000	0.000	0.000	0.000	0.000	0.000	0.000	0.000	0.000	0.000	0.000	0.000	80	530	4598	5101	-0.421	Error	Error	1966	2632	0	0	2120	2981	0	0	0	0
1	15	8	"RIS1"	"YOR191W"	4780	15390	110	514	489	266	91	133	366	57	8	0	840	766	416	275	333	443	62	11	0	0	0	0	0	0	0	0	0	0	0	0	0	0	0	0	0	0	0	0.749	0.811	0.685	0.662	2.036	0.674	0.731	0.000	0.000	0.000	0.000	0.000	0.000	0.000	0.000	0.000	0.000	0.000	0.000	0.000	0.000	80	505	988	889	-0.418	Error	Error	423	565	0	0	398	491	0	0	0	0
1	16	8	"MCT1"	"YOR221C"	4950	15380	110	12866	10580	4996	90	303	1416	93	82	0	8044	6813	2939	259	503	1621	88	80	0	0	0	0	0	0	0	0	0	0	0	0	0	0	0	0	0	0	0	1.641	1.601	1.589	1.526	1.405	1.632	0.913	0.000	0.000	0.000	0.000	0.000	0.000	0.000	0.000	0.000	0.000	0.000	0.000	0.000	0.000	80	486	20561	17044	0.715	Error	Error	12776	7785	0	0	10490	6554	0	0	0	0
1	17	8	""	"YOR253W"	5140	15380	110	4216	3637	1988	96	273	996	78	72	0	4921	4133	2180	272	563	1678	77	68	0	0	0	0	0	0	0	0	0	0	0	0	0	0	0	0	0	0	0	0.886	0.917	0.916	0.989	1.821	0.907	0.908	0.000	0.000	0.000	0.000	0.000	0.000	0.000	0.000	0.000	0.000	0.000	0.000	0.000	0.000	80	497	8769	7402	-0.174	Error	Error	4120	4649	0	0	3541	3861	0	0	0	0
1	18	8	""	"YOR192C-A"	5330	15380	110	53362	44126	21412	103	683	4045	97	92	12	43522	36903	15559	288	1185	5239	96	90	0	0	0	0	0	0	0	0	0	0	0	0	0	0	0	0	0	0	0	1.232	1.202	1.199	1.115	1.401	1.239	0.921	0.000	0.000	0.000	0.000	0.000	0.000	0.000	0.000	0.000	0.000	0.000	0.000	0.000	0.000	80	485	96493	80638	0.301	Error	Error	53259	43234	0	0	44023	36615	0	0	0	0
1	19	8	""	"YOR223W"	5510	15380	110	8300	6906	3441	95	745	4129	72	48	0	5549	4773	2312	268	1117	5099	55	0	0	0	0	0	0	0	0	0	0	0	0	0	0	0	0	0	0	0	0	1.554	1.512	1.540	1.568	1.542	0.922	0.781	0.000	0.000	0.000	0.000	0.000	0.000	0.000	0.000	0.000	0.000	0.000	0.000	0.000	0.000	80	484	13486	11316	0.636	Error	Error	8205	5281	0	0	6811	4505	0	0	0	0
1	20	8	""	"YOR255W"	5700	15380	110	9357	7835	4238	91	436	1681	83	75	0	8425	7103	3742	262	662	1766	81	75	0	0	0	0	0	0	0	0	0	0	0	0	0	0	0	0	0	0	0	1.135	1.132	1.148	1.170	1.637	1.125	0.912	0.000	0.000	0.000	0.000	0.000	0.000	0.000	0.000	0.000	0.000	0.000	0.000	0.000	0.000	80	506	17429	14585	0.183	Error	Error	9266	8163	0	0	7744	6841	0	0	0	0
1	21	8	""	"YOR193W"	5900	15380	110	5556	4669	2096	89	413	1694	82	75	0	4051	3626	1719	266	621	1655	80	63	0	0	0	0	0	0	0	0	0	0	0	0	0	0	0	0	0	0	0	1.444	1.363	1.388	1.533	1.705	1.310	0.912	0.000	0.000	0.000	0.000	0.000	0.000	0.000	0.000	0.000	0.000	0.000	0.000	0.000	0.000	80	495	9252	7940	0.530	Error	Error	5467	3785	0	0	4580	3360	0	0	0	0
1	22	8	""	"YOR225W"	6080	15380	110	1920	1607	785	87	134	251	88	81	0	1452	1311	678	258	324	347	77	73	0	0	0	0	0	0	0	0	0	0	0	0	0	0	0	0	0	0	0	1.535	1.443	1.412	1.499	1.725	1.281	0.832	0.000	0.000	0.000	0.000	0.000	0.000	0.000	0.000	0.000	0.000	0.000	0.000	0.000	0.000	80	486	3027	2573	0.618	Error	Error	1833	1194	0	0	1520	1053	0	0	0	0
1	1	9	"cdc31"	"YOR257W"	2070	15570	110	5637	6189	5357	75	493	1943	67	57	0	3535	3312	2875	293	616	1612	56	50	0	0	0	0	0	0	0	0	0	0	0	0	0	0	0	0	0	0	0	1.716	2.025	2.020	2.770	3.129	1.899	0.892	0.000	0.000	0.000	0.000	0.000	0.000	0.000	0.000	0.000	0.000	0.000	0.000	0.000	0.000	80	520	8804	9133	0.779	Error	Error	5562	3242	0	0	6114	3019	0	0	0	0
1	2	9	"SLK19"	"YOR195W"	2270	15570	110	8248	6994	3352	83	679	2119	83	73	0	10313	8676	4128	284	876	2085	85	80	0	0	0	0	0	0	0	0	0	0	0	0	0	0	0	0	0	0	0	0.814	0.824	0.817	0.909	1.771	0.814	0.901	0.000	0.000	0.000	0.000	0.000	0.000	0.000	0.000	0.000	0.000	0.000	0.000	0.000	0.000	80	508	18194	15303	-0.297	Error	Error	8165	10029	0	0	6911	8392	0	0	0	0
1	3	9	""	"YOR227W"	2460	15570	110	2021	1951	1037	82	527	1628	65	3	0	2451	2417	1387	267	750	1747	68	12	0	0	0	0	0	0	0	0	0	0	0	0	0	0	0	0	0	0	0	0.888	0.869	0.887	0.901	1.829	0.696	0.816	0.000	0.000	0.000	0.000	0.000	0.000	0.000	0.000	0.000	0.000	0.000	0.000	0.000	0.000	80	518	4123	4019	-0.172	Error	Error	1939	2184	0	0	1869	2150	0	0	0	0
1	4	9	"RPT4"	"YOR259C"	2690	15580	110	7577	6571	3101	83	537	1731	85	80	0	5838	5146	2496	270	586	1247	86	76	0	0	0	0	0	0	0	0	0	0	0	0	0	0	0	0	0	0	0	1.346	1.331	1.340	1.355	1.545	1.307	0.912	0.000	0.000	0.000	0.000	0.000	0.000	0.000	0.000	0.000	0.000	0.000	0.000	0.000	0.000	80	454	13062	11364	0.429	Error	Error	7494	5568	0	0	6488	4876	0	0	0	0
1	5	9	"NIP100"	"YPL174C"	2830	15570	110	7921	7171	4176	85	230	894	87	80	0	12604	12228	8126	279	657	2051	80	73	0	0	0	0	0	0	0	0	0	0	0	0	0	0	0	0	0	0	0	0.636	0.593	0.603	0.677	1.925	0.531	0.882	0.000	0.000	0.000	0.000	0.000	0.000	0.000	0.000	0.000	0.000	0.000	0.000	0.000	0.000	80	413	20161	19035	-0.653	Error	Error	7836	12325	0	0	7086	11949	0	0	0	0
1	6	9	""	"YPL205C"	3030	15560	110	3775	3061	1864	87	292	967	76	63	0	2538	2075	1369	285	678	1922	60	1	0	0	0	0	0	0	0	0	0	0	0	0	0	0	0	0	0	0	0	1.637	1.661	1.673	2.121	2.267	1.480	0.872	0.000	0.000	0.000	0.000	0.000	0.000	0.000	0.000	0.000	0.000	0.000	0.000	0.000	0.000	80	497	5941	4764	0.711	Error	Error	3688	2253	0	0	2974	1790	0	0	0	0
1	7	9	"SUI3"	"YPL237W"	3220	15560	110	7452	6223	4472	93	474	1742	73	62	0	5446	4666	3446	297	660	1840	66	56	0	0	0	0	0	0	0	0	0	0	0	0	0	0	0	0	0	0	0	1.429	1.403	1.502	1.922	2.319	1.404	0.872	0.000	0.000	0.000	0.000	0.000	0.000	0.000	0.000	0.000	0.000	0.000	0.000	0.000	0.000	80	531	12508	10499	0.515	Error	Error	7359	5149	0	0	6130	4369	0	0	0	0
1	8	9	""	"YPL176C"	3420	15570	120	10723	9559	3633	89	442	1904	92	89	0	6661	5905	2627	279	528	1292	89	80	0	0	0	0	0	0	0	0	0	0	0	0	0	0	0	0	0	0	0	1.666	1.683	1.723	1.883	1.614	1.647	0.909	0.000	0.000	0.000	0.000	0.000	0.000	0.000	0.000	0.000	0.000	0.000	0.000	0.000	0.000	120	554	17016	15096	0.737	Error	Error	10634	6382	0	0	9470	5626	0	0	0	0
1	9	9	""	"YPL207W"	3580	15570	110	9033	9232	4317	94	677	2266	92	86	0	6467	6726	3191	291	817	1901	87	82	0	0	0	0	0	0	0	0	0	0	0	0	0	0	0	0	0	0	0	1.447	1.420	1.400	1.526	1.882	1.372	0.903	0.000	0.000	0.000	0.000	0.000	0.000	0.000	0.000	0.000	0.000	0.000	0.000	0.000	0.000	80	492	15115	15573	0.533	Error	Error	8939	6176	0	0	9138	6435	0	0	0	0
1	10	9	"YAR1"	"YPL239W"	3800	15570	120	6220	5254	2459	94	477	1725	84	74	0	3317	2833	1342	285	689	1694	74	31	0	0	0	0	0	0	0	0	0	0	0	0	0	0	0	0	0	0	0	2.020	2.025	2.025	2.163	1.636	1.941	0.824	0.000	0.000	0.000	0.000	0.000	0.000	0.000	0.000	0.000	0.000	0.000	0.000	0.000	0.000	120	582	9158	7708	1.015	Error	Error	6126	3032	0	0	5160	2548	0	0	0	0
1	11	9	"MUD13"	"YPL178W"	3980	15570	120	4479	3896	1790	94	149	543	91	86	0	10905	9328	4797	283	336	454	95	92	0	0	0	0	0	0	0	0	0	0	0	0	0	0	0	0	0	0	0	0.413	0.420	0.411	0.459	1.771	0.384	0.900	0.000	0.000	0.000	0.000	0.000	0.000	0.000	0.000	0.000	0.000	0.000	0.000	0.000	0.000	120	528	15007	12847	-1.276	Error	Error	4385	10622	0	0	3802	9045	0	0	0	0
1	12	9	"ipl1"	"YPL209C"	4170	15570	120	9118	8099	3772	98	165	677	96	90	0	4851	4144	2028	282	405	1248	81	72	0	0	0	0	0	0	0	0	0	0	0	0	0	0	0	0	0	0	0	1.974	2.072	2.058	2.177	1.663	2.031	0.905	0.000	0.000	0.000	0.000	0.000	0.000	0.000	0.000	0.000	0.000	0.000	0.000	0.000	0.000	120	550	13589	11863	0.981	Error	Error	9020	4569	0	0	8001	3862	0	0	0	0
1	13	9	"cin2"	"YPL241C"	4350	15570	110	5797	5038	2308	99	172	568	92	88	0	3767	3246	1633	283	413	956	78	76	0	0	0	0	0	0	0	0	0	0	0	0	0	0	0	0	0	0	0	1.635	1.667	1.675	1.827	1.849	1.624	0.875	0.000	0.000	0.000	0.000	0.000	0.000	0.000	0.000	0.000	0.000	0.000	0.000	0.000	0.000	80	510	9182	7902	0.710	Error	Error	5698	3484	0	0	4939	2963	0	0	0	0
1	14	9	""	"YPL180W"	4560	15570	120	13447	11780	4980	91	148	485	99	96	0	7917	7009	2881	292	356	485	97	90	0	0	0	0	0	0	0	0	0	0	0	0	0	0	0	0	0	0	0	1.752	1.740	1.768	1.786	1.554	1.772	0.896	0.000	0.000	0.000	0.000	0.000	0.000	0.000	0.000	0.000	0.000	0.000	0.000	0.000	0.000	120	601	20981	18406	0.809	Error	Error	13356	7625	0	0	11689	6717	0	0	0	0
1	15	9	"NIP7"	"YPL211W"	4750	15570	120	4896	4278	2042	85	90	36	98	96	0	4132	3575	1704	276	279	83	90	88	0	0	0	0	0	0	0	0	0	0	0	0	0	0	0	0	0	0	0	1.248	1.271	1.248	1.336	1.721	1.261	0.888	0.000	0.000	0.000	0.000	0.000	0.000	0.000	0.000	0.000	0.000	0.000	0.000	0.000	0.000	120	527	8667	7492	0.319	Error	Error	4811	3856	0	0	4193	3299	0	0	0	0
1	16	9	"SRP68"	"YPL243W"	4940	15570	120	6830	6609	3555	86	144	653	90	87	0	16414	14772	8231	254	316	653	95	90	0	0	0	0	0	0	0	0	0	0	0	0	0	0	0	0	0	0	0	0.417	0.449	0.447	0.471	1.707	0.413	0.889	0.000	0.000	0.000	0.000	0.000	0.000	0.000	0.000	0.000	0.000	0.000	0.000	0.000	0.000	120	502	22904	21041	-1.261	Error	Error	6744	16160	0	0	6523	14518	0	0	0	0
1	17	9	"EMPTY"	"EMPTY"	5120	15570	150	116	141	97	92	218	854	0	0	0	280	327	170	265	429	1027	0	0	0	0	0	0	0	0	0	0	0	0	0	0	0	0	0	0	0	0	0	1.600	0.790	0.507	0.527	3.293	0.351	0.289	0.000	0.000	0.000	0.000	0.000	0.000	0.000	0.000	0.000	0.000	0.000	0.000	0.000	0.000	156	636	39	111	0.678	Error	Error	24	15	0	0	49	62	0	0	-75	0
1	18	9	"EMPTY"	"EMPTY"	5310	15570	150	99	120	73	91	528	3615	0	0	0	273	306	149	265	845	4439	0	0	0	0	0	0	0	0	0	0	0	0	0	0	0	0	0	0	0	0	0	1.000	0.707	0.467	0.443	4.014	0.722	0.986	0.000	0.000	0.000	0.000	0.000	0.000	0.000	0.000	0.000	0.000	0.000	0.000	0.000	0.000	156	606	16	70	0.000	Error	Error	8	8	0	0	29	41	0	0	-75	0
1	19	9	"EMPTY"	"EMPTY"	5500	15570	150	102	126	87	84	554	3618	0	0	0	272	307	172	255	867	4429	0	0	0	0	0	0	0	0	0	0	0	0	0	0	0	0	0	0	0	0	0	1.059	0.808	0.468	0.443	3.213	0.511	0.406	0.000	0.000	0.000	0.000	0.000	0.000	0.000	0.000	0.000	0.000	0.000	0.000	0.000	0.000	156	617	35	94	0.082	Error	Error	18	17	0	0	42	52	0	0	-75	0
1	20	9	"EMPTY"	"EMPTY"	5690	15570	150	90	117	81	82	312	1416	0	0	0	275	313	166	252	518	1456	0	0	0	0	0	0	0	0	0	0	0	0	0	0	0	0	0	0	0	0	0	0.348	0.574	0.469	0.438	3.683	0.679	0.895	0.000	0.000	0.000	0.000	0.000	0.000	0.000	0.000	0.000	0.000	0.000	0.000	0.000	0.000	156	631	31	96	-1.524	Error	Error	8	23	0	0	35	61	0	0	-75	0
1	21	9	"EMPTY"	"EMPTY"	5880	15570	150	99	112	59	84	268	1287	0	0	0	267	297	151	258	528	1671	0	0	0	0	0	0	0	0	0	0	0	0	0	0	0	0	0	0	0	0	0	1.667	0.718	0.435	0.375	3.574	0.307	0.250	0.000	0.000	0.000	0.000	0.000	0.000	0.000	0.000	0.000	0.000	0.000	0.000	0.000	0.000	156	619	24	67	0.737	Error	Error	15	9	0	0	28	39	0	0	-75	0
1	22	9	"EMPTY"	"EMPTY"	6070	15570	150	94	112	67	82	126	269	0	0	0	259	307	184	250	357	1029	0	0	0	0	0	0	0	0	0	0	0	0	0	0	0	0	0	0	0	0	0	1.333	0.526	0.394	0.397	3.636	0.340	0.327	0.000	0.000	0.000	0.000	0.000	0.000	0.000	0.000	0.000	0.000	0.000	0.000	0.000	0.000	156	812	21	87	0.415	Error	Error	12	9	0	0	30	57	0	0	-75	0
1	1	10	"EMPTY"	"EMPTY"	2080	15760	150	78	90	41	70	283	1420	0	0	0	305	313	106	280	448	1196	0	0	0	0	0	0	0	0	0	0	0	0	0	0	0	0	0	0	0	0	0	0.320	0.606	0.407	0.384	3.940	0.372	0.158	0.000	0.000	0.000	0.000	0.000	0.000	0.000	0.000	0.000	0.000	0.000	0.000	0.000	0.000	156	871	33	53	-1.644	Error	Error	8	25	0	0	20	33	0	0	-75	0
1	2	10	"EMPTY"	"EMPTY"	2270	15760	150	96	100	46	73	400	1612	0	0	0	279	288	106	262	580	1511	0	0	0	0	0	0	0	0	0	0	0	0	0	0	0	0	0	0	0	0	0	1.353	1.038	0.496	0.605	3.647	0.532	0.899	0.000	0.000	0.000	0.000	0.000	0.000	0.000	0.000	0.000	0.000	0.000	0.000	0.000	0.000	156	650	40	53	0.436	Error	Error	23	17	0	0	27	26	0	0	-75	0
1	3	10	"EMPTY"	"EMPTY"	2460	15760	150	88	96	44	73	262	1041	0	0	0	264	293	133	253	495	1236	0	0	0	0	0	0	0	0	0	0	0	0	0	0	0	0	0	0	0	0	0	1.364	0.575	0.393	0.438	3.401	0.110	0.069	0.000	0.000	0.000	0.000	0.000	0.000	0.000	0.000	0.000	0.000	0.000	0.000	0.000	0.000	156	661	26	63	0.447	Error	Error	15	11	0	0	23	40	0	0	-75	0
1	4	10	"EMPTY"	"EMPTY"	2650	15760	150	91	99	49	76	317	1233	0	0	0	283	289	115	261	452	957	0	0	0	0	0	0	0	0	0	0	0	0	0	0	0	0	0	0	0	0	0	0.682	0.821	0.491	0.507	3.514	1.628	0.806	0.000	0.000	0.000	0.000	0.000	0.000	0.000	0.000	0.000	0.000	0.000	0.000	0.000	0.000	156	634	37	51	-0.553	Error	Error	15	22	0	0	23	28	0	0	-75	0
1	5	10	"EMPTY"	"EMPTY"	2840	15760	150	89	96	48	79	180	746	0	0	0	279	297	131	273	523	1664	0	0	0	0	0	0	0	0	0	0	0	0	0	0	0	0	0	0	0	0	0	1.667	0.708	0.347	0.309	2.801	0.167	0.132	0.000	0.000	0.000	0.000	0.000	0.000	0.000	0.000	0.000	0.000	0.000	0.000	0.000	0.000	156	599	16	41	0.737	Error	Error	10	6	0	0	17	24	0	0	-75	0
1	6	10	"EMPTY"	"EMPTY"	3030	15760	150	99	106	59	82	183	656	0	0	0	288	312	149	282	447	1163	0	0	0	0	0	0	0	0	0	0	0	0	0	0	0	0	0	0	0	0	0	2.833	0.800	0.431	0.488	3.521	0.147	0.085	0.000	0.000	0.000	0.000	0.000	0.000	0.000	0.000	0.000	0.000	0.000	0.000	0.000	0.000	156	756	23	54	1.503	Error	Error	17	6	0	0	24	30	0	0	-75	0
1	7	10	""	"iYBL019W"	3230	15770	110	741	723	462	82	104	322	72	52	0	1410	1267	806	271	304	349	72	63	0	0	0	0	0	0	0	0	0	0	0	0	0	0	0	0	0	0	0	0.579	0.644	0.596	0.633	2.145	0.550	0.805	0.000	0.000	0.000	0.000	0.000	0.000	0.000	0.000	0.000	0.000	0.000	0.000	0.000	0.000	80	552	1798	1637	-0.789	Error	Error	659	1139	0	0	641	996	0	0	0	0
1	8	10	""	"iYBL015W"	3440	15770	110	9219	7796	4551	86	93	54	100	100	0	7661	6343	3857	275	300	158	98	95	0	0	0	0	0	0	0	0	0	0	0	0	0	0	0	0	0	0	0	1.237	1.271	1.281	1.385	1.983	1.212	0.901	0.000	0.000	0.000	0.000	0.000	0.000	0.000	0.000	0.000	0.000	0.000	0.000	0.000	0.000	80	519	16519	13778	0.306	Error	Error	9133	7386	0	0	7710	6068	0	0	0	0
1	9	10	""	"iYBL014C"	3620	15760	110	2789	2348	1206	85	183	867	77	72	0	2354	2032	1021	268	365	738	76	70	0	0	0	0	0	0	0	0	0	0	0	0	0	0	0	0	0	0	0	1.296	1.283	1.284	1.341	2.064	1.262	0.886	0.000	0.000	0.000	0.000	0.000	0.000	0.000	0.000	0.000	0.000	0.000	0.000	0.000	0.000	80	520	4790	4027	0.374	Error	Error	2704	2086	0	0	2263	1764	0	0	0	0
1	10	10	""	"iYBR001C"	3810	15760	110	2672	2466	764	79	102	179	100	100	0	5304	5035	1350	256	332	526	100	100	0	0	0	0	0	0	0	0	0	0	0	0	0	0	0	0	0	0	0	0.514	0.499	0.512	0.488	1.273	0.497	0.932	0.000	0.000	0.000	0.000	0.000	0.000	0.000	0.000	0.000	0.000	0.000	0.000	0.000	0.000	80	511	7641	7166	-0.961	Error	Error	2593	5048	0	0	2387	4779	0	0	0	0
1	11	10	""	"iYBR005W"	4000	15760	110	4752	4397	2261	87	123	245	93	90	0	11909	10241	5254	268	424	1021	85	85	0	0	0	0	0	0	0	0	0	0	0	0	0	0	0	0	0	0	0	0.401	0.432	0.417	0.433	1.696	0.412	0.901	0.000	0.000	0.000	0.000	0.000	0.000	0.000	0.000	0.000	0.000	0.000	0.000	0.000	0.000	80	522	16306	14283	-1.319	Error	Error	4665	11641	0	0	4310	9973	0	0	0	0
1	12	10	""	"iYBR008C"	4190	15760	110	6973	6751	3698	89	132	348	92	88	0	8439	7418	4158	266	408	1038	82	80	0	0	0	0	0	0	0	0	0	0	0	0	0	0	0	0	0	0	0	0.842	0.931	0.941	1.020	1.702	0.906	0.909	0.000	0.000	0.000	0.000	0.000	0.000	0.000	0.000	0.000	0.000	0.000	0.000	0.000	0.000	80	522	15057	13814	-0.248	Error	Error	6884	8173	0	0	6662	7152	0	0	0	0
1	13	10	""	"iYBR022W"	4390	15760	110	1111	1026	579	89	139	469	73	60	0	4055	3518	2184	267	372	779	75	71	0	0	0	0	0	0	0	0	0	0	0	0	0	0	0	0	0	0	0	0.270	0.288	0.288	0.331	2.585	0.243	0.804	0.000	0.000	0.000	0.000	0.000	0.000	0.000	0.000	0.000	0.000	0.000	0.000	0.000	0.000	80	530	4810	4188	-1.890	Error	Error	1022	3788	0	0	937	3251	0	0	0	0
1	14	10	""	"iYBR027C"	4570	15770	100	884	765	386	83	87	38	92	85	0	1248	1151	640	257	275	149	83	77	0	0	0	0	0	0	0	0	0	0	0	0	0	0	0	0	0	0	0	0.808	0.763	0.754	0.739	1.777	0.664	0.826	0.000	0.000	0.000	0.000	0.000	0.000	0.000	0.000	0.000	0.000	0.000	0.000	0.000	0.000	80	448	1792	1576	-0.307	Error	Error	801	991	0	0	682	894	0	0	0	0
1	15	10	""	"iYBR031W"	4770	15770	120	1293	1138	561	78	83	34	96	95	0	3629	3204	1824	245	256	87	90	88	0	0	0	0	0	0	0	0	0	0	0	0	0	0	0	0	0	0	0	0.359	0.358	0.346	0.409	2.086	0.320	0.879	0.000	0.000	0.000	0.000	0.000	0.000	0.000	0.000	0.000	0.000	0.000	0.000	0.000	0.000	120	563	4599	4019	-1.478	Error	Error	1215	3384	0	0	1060	2959	0	0	0	0
1	16	10	""	"iYBRWdelta16"	4950	15760	110	5461	4848	2289	82	141	462	91	87	0	7108	6349	3242	258	400	1036	85	82	0	0	0	0	0	0	0	0	0	0	0	0	0	0	0	0	0	0	0	0.785	0.782	0.807	0.895	1.812	0.727	0.892	0.000	0.000	0.000	0.000	0.000	0.000	0.000	0.000	0.000	0.000	0.000	0.000	0.000	0.000	80	486	12229	10857	-0.349	Error	Error	5379	6850	0	0	4766	6091	0	0	0	0
1	17	10	""	"iYBR048W"	5150	15770	120	5248	4652	2573	82	140	439	90	87	0	14767	13433	8399	264	395	978	86	84	0	0	0	0	0	0	0	0	0	0	0	0	0	0	0	0	0	0	0	0.356	0.347	0.342	0.403	1.862	0.315	0.918	0.000	0.000	0.000	0.000	0.000	0.000	0.000	0.000	0.000	0.000	0.000	0.000	0.000	0.000	120	549	19669	17739	-1.489	Error	Error	5166	14503	0	0	4570	13169	0	0	0	0
1	18	10	""	"iYBR053C-0"	5340	15770	120	6206	5451	2458	78	82	32	100	100	0	2929	2664	1275	248	256	81	93	92	0	0	0	0	0	0	0	0	0	0	0	0	0	0	0	0	0	0	0	2.286	2.224	2.249	2.381	1.693	2.180	0.904	0.000	0.000	0.000	0.000	0.000	0.000	0.000	0.000	0.000	0.000	0.000	0.000	0.000	0.000	120	521	8809	7789	1.193	Error	Error	6128	2681	0	0	5373	2416	0	0	0	0
1	19	10	""	"iYCR022C"	5520	15760	110	4128	3617	1783	78	143	450	90	85	0	6619	5778	3015	247	403	1007	85	81	0	0	0	0	0	0	0	0	0	0	0	0	0	0	0	0	0	0	0	0.636	0.640	0.637	0.656	1.461	0.599	0.921	0.000	0.000	0.000	0.000	0.000	0.000	0.000	0.000	0.000	0.000	0.000	0.000	0.000	0.000	80	462	10422	9070	-0.654	Error	Error	4050	6372	0	0	3539	5531	0	0	0	0
1	20	10	""	"iYCR025C"	5720	15770	120	3057	2699	1379	82	139	415	89	83	0	2238	2034	1035	252	389	918	77	55	0	0	0	0	0	0	0	0	0	0	0	0	0	0	0	0	0	0	0	1.498	1.469	1.499	1.625	1.810	1.477	0.866	0.000	0.000	0.000	0.000	0.000	0.000	0.000	0.000	0.000	0.000	0.000	0.000	0.000	0.000	120	556	4961	4399	0.583	Error	Error	2975	1986	0	0	2617	1782	0	0	0	0
1	21	10	""	"iYCRWdelta11"	5900	15760	110	4989	4647	2029	83	121	323	97	95	0	15020	13841	5707	265	494	1841	96	91	0	0	0	0	0	0	0	0	0	0	0	0	0	0	0	0	0	0	0	0.332	0.336	0.326	0.329	1.338	0.320	0.920	0.000	0.000	0.000	0.000	0.000	0.000	0.000	0.000	0.000	0.000	0.000	0.000	0.000	0.000	80	454	19661	18140	-1.589	Error	Error	4906	14755	0	0	4564	13576	0	0	0	0
1	22	10	""	"iYCR043C"	6080	15760	110	1434	1234	517	83	135	335	90	78	0	1311	1236	532	257	482	1733	5	0	0	0	0	0	0	0	0	0	0	0	0	0	0	0	0	0	0	0	0	1.282	1.176	1.194	1.160	1.686	0.247	0.369	0.000	0.000	0.000	0.000	0.000	0.000	0.000	0.000	0.000	0.000	0.000	0.000	0.000	0.000	80	516	2405	2130	0.358	Error	Error	1351	1054	0	0	1151	979	0	0	0	0
1	1	11	""	"iYCR047C"	2110	15960	110	4122	3664	1713	71	101	398	90	86	0	3058	2774	1329	276	341	872	82	76	0	0	0	0	0	0	0	0	0	0	0	0	0	0	0	0	0	0	0	1.456	1.438	1.429	1.455	1.379	1.398	0.896	0.000	0.000	0.000	0.000	0.000	0.000	0.000	0.000	0.000	0.000	0.000	0.000	0.000	0.000	80	534	6833	6091	0.542	Error	Error	4051	2782	0	0	3593	2498	0	0	0	0
1	2	11	""	"iYCR053W"	2300	15950	110	1200	1058	486	69	72	28	96	95	0	6144	5475	2664	246	280	266	87	86	0	0	0	0	0	0	0	0	0	0	0	0	0	0	0	0	0	0	0	0.192	0.189	0.181	0.193	1.666	0.179	0.910	0.000	0.000	0.000	0.000	0.000	0.000	0.000	0.000	0.000	0.000	0.000	0.000	0.000	0.000	80	487	7029	6218	-2.383	Error	Error	1131	5898	0	0	989	5229	0	0	0	0
1	3	11	""	"iYCR075C"	2480	15960	110	4985	4611	2604	73	113	317	87	85	0	5119	4618	2705	243	352	641	80	78	0	0	0	0	0	0	0	0	0	0	0	0	0	0	0	0	0	0	0	1.007	1.037	1.005	1.255	2.467	0.993	0.913	0.000	0.000	0.000	0.000	0.000	0.000	0.000	0.000	0.000	0.000	0.000	0.000	0.000	0.000	80	498	9788	8913	0.011	Error	Error	4912	4876	0	0	4538	4375	0	0	0	0
1	4	11	""	"iYCR081W"	2680	15950	110	3497	2949	1397	74	125	385	88	83	0	4593	4010	2000	249	345	657	85	82	0	0	0	0	0	0	0	0	0	0	0	0	0	0	0	0	0	0	0	0.788	0.764	0.774	0.880	2.249	0.697	0.888	0.000	0.000	0.000	0.000	0.000	0.000	0.000	0.000	0.000	0.000	0.000	0.000	0.000	0.000	80	497	7767	6636	-0.344	Error	Error	3423	4344	0	0	2875	3761	0	0	0	0
1	5	11	""	"iYCR085W"	2860	15950	100	1665	1622	956	76	100	161	90	86	0	1269	1240	661	263	297	204	85	78	0	0	0	0	0	0	0	0	0	0	0	0	0	0	0	0	0	0	0	1.580	1.582	1.597	1.648	1.753	1.501	0.808	0.000	0.000	0.000	0.000	0.000	0.000	0.000	0.000	0.000	0.000	0.000	0.000	0.000	0.000	80	453	2595	2523	0.659	Error	Error	1589	1006	0	0	1546	977	0	0	0	0
1	6	11	""	"itT(AGU)C"	3070	15960	110	2773	2640	1729	77	117	250	81	80	0	7000	6078	3939	267	302	244	78	77	0	0	0	0	0	0	0	0	0	0	0	0	0	0	0	0	0	0	0	0.400	0.441	0.418	0.419	1.847	0.396	0.875	0.000	0.000	0.000	0.000	0.000	0.000	0.000	0.000	0.000	0.000	0.000	0.000	0.000	0.000	80	548	9429	8374	-1.320	Error	Error	2696	6733	0	0	2563	5811	0	0	0	0
1	7	11	""	"iYCR100C"	3270	15960	110	4261	3480	1872	74	83	51	95	92	0	3221	2937	1615	258	270	107	83	82	0	0	0	0	0	0	0	0	0	0	0	0	0	0	0	0	0	0	0	1.413	1.271	1.226	1.291	1.670	1.230	0.892	0.000	0.000	0.000	0.000	0.000	0.000	0.000	0.000	0.000	0.000	0.000	0.000	0.000	0.000	80	498	7150	6085	0.499	Error	Error	4187	2963	0	0	3406	2679	0	0	0	0
1	8	11	""	"iYCR103C"	3430	15950	100	12432	10864	6229	80	212	993	90	82	0	14176	11888	7370	275	545	1947	77	73	0	0	0	0	0	0	0	0	0	0	0	0	0	0	0	0	0	0	0	0.889	0.929	0.934	1.121	1.930	0.860	0.903	0.000	0.000	0.000	0.000	0.000	0.000	0.000	0.000	0.000	0.000	0.000	0.000	0.000	0.000	80	436	26253	22397	-0.170	Error	Error	12352	13901	0	0	10784	11613	0	0	0	0
1	9	11	""	"iYDR045C"	3630	15950	110	4068	3614	1681	84	192	891	86	82	0	6354	5738	2772	265	512	1767	85	78	0	0	0	0	0	0	0	0	0	0	0	0	0	0	0	0	0	0	0	0.654	0.645	0.637	0.674	1.512	0.613	0.920	0.000	0.000	0.000	0.000	0.000	0.000	0.000	0.000	0.000	0.000	0.000	0.000	0.000	0.000	80	540	10073	9003	-0.612	Error	Error	3984	6089	0	0	3530	5473	0	0	0	0
1	10	11	""	"iYDR050C"	3820	15950	100	4190	4023	2081	81	119	220	93	88	0	3777	3410	1952	256	359	583	80	77	0	0	0	0	0	0	0	0	0	0	0	0	0	0	0	0	0	0	0	1.167	1.250	1.244	1.575	2.335	1.157	0.894	0.000	0.000	0.000	0.000	0.000	0.000	0.000	0.000	0.000	0.000	0.000	0.000	0.000	0.000	80	474	7630	7096	0.223	Error	Error	4109	3521	0	0	3942	3154	0	0	0	0
1	11	11	""	"iYDR055W"	4010	15960	110	1129	1000	462	86	106	153	85	85	0	1153	1034	503	262	307	317	81	65	0	0	0	0	0	0	0	0	0	0	0	0	0	0	0	0	0	0	0	1.171	1.184	1.182	1.100	2.152	1.094	0.789	0.000	0.000	0.000	0.000	0.000	0.000	0.000	0.000	0.000	0.000	0.000	0.000	0.000	0.000	80	528	1934	1686	0.227	Error	Error	1043	891	0	0	914	772	0	0	0	0
1	12	11	""	"iYDR070C"	4200	15950	110	3109	2701	1280	81	114	275	91	86	0	2655	2321	1095	260	314	439	83	78	0	0	0	0	0	0	0	0	0	0	0	0	0	0	0	0	0	0	0	1.264	1.271	1.231	1.291	1.936	1.256	0.912	0.000	0.000	0.000	0.000	0.000	0.000	0.000	0.000	0.000	0.000	0.000	0.000	0.000	0.000	80	542	5423	4681	0.338	Error	Error	3028	2395	0	0	2620	2061	0	0	0	0
1	13	11	""	"iYDR074W"	4400	15950	110	4933	4207	2117	80	102	223	91	88	0	3742	3229	1695	257	314	504	85	81	0	0	0	0	0	0	0	0	0	0	0	0	0	0	0	0	0	0	0	1.393	1.389	1.398	1.377	1.332	1.352	0.914	0.000	0.000	0.000	0.000	0.000	0.000	0.000	0.000	0.000	0.000	0.000	0.000	0.000	0.000	80	538	8338	7099	0.478	Error	Error	4853	3485	0	0	4127	2972	0	0	0	0
1	14	11	""	"iYDR078C"	4580	15950	110	1662	1470	708	77	120	413	83	80	0	2034	1840	902	241	292	331	82	77	0	0	0	0	0	0	0	0	0	0	0	0	0	0	0	0	0	0	0	0.884	0.871	0.878	0.867	1.908	0.829	0.849	0.000	0.000	0.000	0.000	0.000	0.000	0.000	0.000	0.000	0.000	0.000	0.000	0.000	0.000	80	508	3378	2992	-0.178	Error	Error	1585	1793	0	0	1393	1599	0	0	0	0
1	15	11	""	"iYDR092W"	4770	15950	110	3341	3126	1408	76	111	330	93	90	0	2312	2227	997	237	286	325	88	87	0	0	0	0	0	0	0	0	0	0	0	0	0	0	0	0	0	0	0	1.573	1.533	1.532	1.596	1.543	1.527	0.881	0.000	0.000	0.000	0.000	0.000	0.000	0.000	0.000	0.000	0.000	0.000	0.000	0.000	0.000	80	500	5340	5040	0.654	Error	Error	3265	2075	0	0	3050	1990	0	0	0	0
1	16	11	""	"iYDR098C"	4960	15960	110	783	705	360	79	103	204	81	73	0	1357	1225	636	249	302	357	76	72	0	0	0	0	0	0	0	0	0	0	0	0	0	0	0	0	0	0	0	0.635	0.641	0.635	0.596	2.263	0.573	0.812	0.000	0.000	0.000	0.000	0.000	0.000	0.000	0.000	0.000	0.000	0.000	0.000	0.000	0.000	80	518	1812	1602	-0.654	Error	Error	704	1108	0	0	626	976	0	0	0	0
1	17	11	""	"iYDRCdelta9-1"	5140	15960	110	940	1012	623	78	151	603	76	26	0	1087	1034	541	261	417	1348	15	0	0	0	0	0	0	0	0	0	0	0	0	0	0	0	0	0	0	0	0	1.044	1.208	1.160	1.041	1.916	1.162	0.772	0.000	0.000	0.000	0.000	0.000	0.000	0.000	0.000	0.000	0.000	0.000	0.000	0.000	0.000	80	499	1688	1707	0.062	Error	Error	862	826	0	0	934	773	0	0	0	0
1	18	11	""	"iYDR115W"	5340	15960	100	1603	1401	555	82	155	396	87	78	0	1247	1114	458	262	338	378	82	68	0	0	0	0	0	0	0	0	0	0	0	0	0	0	0	0	0	0	0	1.544	1.548	1.541	1.537	1.902	1.438	0.862	0.000	0.000	0.000	0.000	0.000	0.000	0.000	0.000	0.000	0.000	0.000	0.000	0.000	0.000	80	469	2506	2171	0.627	Error	Error	1521	985	0	0	1319	852	0	0	0	0
1	19	11	""	"iYDR119W"	5540	15950	110	4503	4083	2153	82	328	1944	77	58	0	8182	7105	3764	256	643	2655	77	70	0	0	0	0	0	0	0	0	0	0	0	0	0	0	0	0	0	0	0	0.558	0.584	0.589	0.614	1.495	0.560	0.914	0.000	0.000	0.000	0.000	0.000	0.000	0.000	0.000	0.000	0.000	0.000	0.000	0.000	0.000	80	544	12347	10850	-0.842	Error	Error	4421	7926	0	0	4001	6849	0	0	0	0
1	20	11	""	"iYDR123C"	5730	15960	110	4946	4913	2891	83	141	338	90	82	0	5171	4555	2559	252	396	950	82	76	0	0	0	0	0	0	0	0	0	0	0	0	0	0	0	0	0	0	0	0.989	1.122	1.136	1.186	1.869	1.116	0.891	0.000	0.000	0.000	0.000	0.000	0.000	0.000	0.000	0.000	0.000	0.000	0.000	0.000	0.000	80	466	9782	9133	-0.017	Error	Error	4863	4919	0	0	4830	4303	0	0	0	0
1	21	11	""	"iYDR431W"	5900	15950	110	671	642	317	83	184	1040	6	0	0	878	839	428	263	506	2808	0	0	0	0	0	0	0	0	0	0	0	0	0	0	0	0	0	0	0	0	0	0.956	0.970	0.936	0.925	1.951	0.862	0.741	0.000	0.000	0.000	0.000	0.000	0.000	0.000	0.000	0.000	0.000	0.000	0.000	0.000	0.000	80	505	1203	1135	-0.065	Error	Error	588	615	0	0	559	576	0	0	0	0
1	22	11	""	"iYDR436W"	6090	15950	110	2974	2918	1729	83	155	433	86	82	0	2597	2458	1370	257	342	474	82	77	0	0	0	0	0	0	0	0	0	0	0	0	0	0	0	0	0	0	0	1.235	1.288	1.290	1.317	1.881	1.267	0.894	0.000	0.000	0.000	0.000	0.000	0.000	0.000	0.000	0.000	0.000	0.000	0.000	0.000	0.000	80	549	5231	5036	0.305	Error	Error	2891	2340	0	0	2835	2201	0	0	0	0
1	1	12	""	"iYDR439W-1"	2090	16140	110	8792	7402	4677	75	376	1630	78	73	0	11868	9470	6302	280	776	2588	72	66	0	0	0	0	0	0	0	0	0	0	0	0	0	0	0	0	0	0	0	0.752	0.797	0.829	0.910	2.162	0.741	0.918	0.000	0.000	0.000	0.000	0.000	0.000	0.000	0.000	0.000	0.000	0.000	0.000	0.000	0.000	80	549	20305	16517	-0.411	Error	Error	8717	11588	0	0	7327	9190	0	0	0	0
1	2	12	""	"iYDR457W"	2280	16140	110	297	329	204	75	376	1634	0	0	0	688	735	413	263	772	2609	0	0	0	0	0	0	0	0	0	0	0	0	0	0	0	0	0	0	0	0	0	0.522	0.538	0.517	0.485	2.154	0.401	0.936	0.000	0.000	0.000	0.000	0.000	0.000	0.000	0.000	0.000	0.000	0.000	0.000	0.000	0.000	80	538	647	726	-0.937	Error	Error	222	425	0	0	254	472	0	0	0	0
1	3	12	""	"iYDR461W"	2480	16140	110	6323	5640	4295	77	164	498	81	72	0	3787	3245	2223	254	356	533	72	71	0	0	0	0	0	0	0	0	0	0	0	0	0	0	0	0	0	0	0	1.768	1.860	1.757	1.919	1.940	1.887	0.877	0.000	0.000	0.000	0.000	0.000	0.000	0.000	0.000	0.000	0.000	0.000	0.000	0.000	0.000	80	514	9779	8554	0.822	Error	Error	6246	3533	0	0	5563	2991	0	0	0	0
1	4	12	""	"iYDR465C"	2660	16140	110	6115	5577	3608	77	348	1170	76	76	0	5425	4602	2960	249	539	1255	73	70	0	0	0	0	0	0	0	0	0	0	0	0	0	0	0	0	0	0	0	1.167	1.263	1.276	1.334	1.859	1.179	0.903	0.000	0.000	0.000	0.000	0.000	0.000	0.000	0.000	0.000	0.000	0.000	0.000	0.000	0.000	80	504	11214	9853	0.222	Error	Error	6038	5176	0	0	5500	4353	0	0	0	0
1	5	12	""	"iYDR481C"	2840	16140	110	2133	1958	1312	80	368	1136	68	43	0	1852	1530	991	254	559	1221	60	7	0	0	0	0	0	0	0	0	0	0	0	0	0	0	0	0	0	0	0	1.285	1.472	1.368	1.398	2.877	1.092	0.828	0.000	0.000	0.000	0.000	0.000	0.000	0.000	0.000	0.000	0.000	0.000	0.000	0.000	0.000	80	516	3651	3154	0.361	Error	Error	2053	1598	0	0	1878	1276	0	0	0	0
1	6	12	""	"iYDR485C"	3030	16150	110	2189	2074	1713	80	247	601	66	62	0	1599	1464	1192	259	409	542	60	55	0	0	0	0	0	0	0	0	0	0	0	0	0	0	0	0	0	0	0	1.574	1.655	1.497	1.465	3.020	1.466	0.872	0.000	0.000	0.000	0.000	0.000	0.000	0.000	0.000	0.000	0.000	0.000	0.000	0.000	0.000	80	520	3449	3199	0.654	Error	Error	2109	1340	0	0	1994	1205	0	0	0	0
1	7	12	""	"iYDR489W"	3220	16140	110	1612	1466	936	74	172	433	78	72	0	1595	1425	890	251	353	427	72	70	0	0	0	0	0	0	0	0	0	0	0	0	0	0	0	0	0	0	0	1.144	1.186	1.150	1.138	2.191	1.083	0.866	0.000	0.000	0.000	0.000	0.000	0.000	0.000	0.000	0.000	0.000	0.000	0.000	0.000	0.000	80	523	2882	2566	0.195	Error	Error	1538	1344	0	0	1392	1174	0	0	0	0
1	8	12	""	"itL(CAA)D"	3410	16140	100	3828	3587	2176	75	178	541	83	77	0	5774	5283	3265	250	470	1099	80	78	0	0	0	0	0	0	0	0	0	0	0	0	0	0	0	0	0	0	0	0.679	0.698	0.673	0.808	2.020	0.645	0.918	0.000	0.000	0.000	0.000	0.000	0.000	0.000	0.000	0.000	0.000	0.000	0.000	0.000	0.000	80	473	9277	8545	-0.558	Error	Error	3753	5524	0	0	3512	5033	0	0	0	0
1	9	12	""	"iYDR511W"	3600	16140	110	1002	869	403	76	174	540	73	28	0	1131	1015	521	242	447	1074	30	0	0	0	0	0	0	0	0	0	0	0	0	0	0	0	0	0	0	0	0	1.042	1.026	1.005	0.919	1.741	0.620	0.574	0.000	0.000	0.000	0.000	0.000	0.000	0.000	0.000	0.000	0.000	0.000	0.000	0.000	0.000	80	530	1815	1566	0.059	Error	Error	926	889	0	0	793	773	0	0	0	0
1	10	12	""	"iYDR516C"	3790	16140	110	5719	4791	2316	85	230	755	87	86	0	4127	3807	1647	262	411	697	88	85	0	0	0	0	0	0	0	0	0	0	0	0	0	0	0	0	0	0	0	1.458	1.328	1.378	1.285	1.486	1.397	0.897	0.000	0.000	0.000	0.000	0.000	0.000	0.000	0.000	0.000	0.000	0.000	0.000	0.000	0.000	80	540	9499	8251	0.544	Error	Error	5634	3865	0	0	4706	3545	0	0	0	0
1	11	12	""	"iYER141W"	3980	16140	100	509	468	244	85	203	728	5	0	0	1049	961	510	269	394	668	61	6	0	0	0	0	0	0	0	0	0	0	0	0	0	0	0	0	0	0	0	0.544	0.553	0.500	0.449	2.147	0.477	0.761	0.000	0.000	0.000	0.000	0.000	0.000	0.000	0.000	0.000	0.000	0.000	0.000	0.000	0.000	80	454	1204	1075	-0.879	Error	Error	424	780	0	0	383	692	0	0	0	0
1	12	12	""	"iYER145C"	4160	16140	110	2999	2973	1810	81	190	587	82	78	0	1953	1845	1142	271	357	423	75	70	0	0	0	0	0	0	0	0	0	0	0	0	0	0	0	0	0	0	0	1.735	1.837	1.766	2.031	2.434	1.699	0.886	0.000	0.000	0.000	0.000	0.000	0.000	0.000	0.000	0.000	0.000	0.000	0.000	0.000	0.000	80	550	4600	4466	0.795	Error	Error	2918	1682	0	0	2892	1574	0	0	0	0
1	13	12	""	"iYER149C"	4370	16150	110	5913	5188	2816	86	224	648	95	80	0	7420	6537	3618	293	456	879	87	77	0	0	0	0	0	0	0	0	0	0	0	0	0	0	0	0	0	0	0	0.818	0.817	0.827	0.910	1.735	0.792	0.899	0.000	0.000	0.000	0.000	0.000	0.000	0.000	0.000	0.000	0.000	0.000	0.000	0.000	0.000	80	522	12954	11346	-0.291	Error	Error	5827	7127	0	0	5102	6244	0	0	0	0
1	14	12	""	"iYER163C-0"	4540	16140	110	6845	5615	2738	82	397	1355	83	76	0	3493	2814	1588	267	535	1107	73	67	0	0	0	0	0	0	0	0	0	0	0	0	0	0	0	0	0	0	0	2.096	2.172	2.150	2.580	2.065	1.914	0.795	0.000	0.000	0.000	0.000	0.000	0.000	0.000	0.000	0.000	0.000	0.000	0.000	0.000	0.000	80	509	9989	8080	1.068	Error	Error	6763	3226	0	0	5533	2547	0	0	0	0
1	15	12	""	"iYER166W"	4730	16140	100	5774	5300	3011	83	527	1615	80	76	0	4314	4055	2287	255	586	1126	81	77	0	0	0	0	0	0	0	0	0	0	0	0	0	0	0	0	0	0	0	1.402	1.373	1.401	1.372	1.441	1.359	0.907	0.000	0.000	0.000	0.000	0.000	0.000	0.000	0.000	0.000	0.000	0.000	0.000	0.000	0.000	80	477	9750	9017	0.488	Error	Error	5691	4059	0	0	5217	3800	0	0	0	0
1	16	12	""	"iYER170W"	4920	16140	110	2437	2145	1005	85	276	941	82	73	0	2082	1930	951	259	460	857	80	57	0	0	0	0	0	0	0	0	0	0	0	0	0	0	0	0	0	0	0	1.290	1.233	1.172	1.320	1.781	1.081	0.819	0.000	0.000	0.000	0.000	0.000	0.000	0.000	0.000	0.000	0.000	0.000	0.000	0.000	0.000	80	524	4175	3731	0.368	Error	Error	2352	1823	0	0	2060	1671	0	0	0	0
1	17	12	""	"iYER183C-1"	5110	16140	100	8921	7541	3538	82	408	1495	85	80	0	14752	12879	6180	259	940	3002	80	80	0	0	0	0	0	0	0	0	0	0	0	0	0	0	0	0	0	0	0	0.610	0.591	0.607	0.640	1.422	0.566	0.919	0.000	0.000	0.000	0.000	0.000	0.000	0.000	0.000	0.000	0.000	0.000	0.000	0.000	0.000	80	465	23332	20079	-0.713	Error	Error	8839	14493	0	0	7459	12620	0	0	0	0
1	18	12	""	"iYERComega1-0"	5300	16140	110	5396	4983	2579	83	487	1614	82	76	0	3964	3717	1781	266	963	2903	70	3	0	0	0	0	0	0	0	0	0	0	0	0	0	0	0	0	0	0	0	1.437	1.420	1.405	1.486	1.565	1.168	0.673	0.000	0.000	0.000	0.000	0.000	0.000	0.000	0.000	0.000	0.000	0.000	0.000	0.000	0.000	80	520	9011	8351	0.523	Error	Error	5313	3698	0	0	4900	3451	0	0	0	0
1	19	12	""	"iYERWomega2-1"	5490	16140	110	27377	25370	14488	85	995	4318	85	81	1	29840	27476	14551	269	1479	5821	85	82	0	0	0	0	0	0	0	0	0	0	0	0	0	0	0	0	0	0	0	0.923	0.929	0.915	0.980	1.607	0.913	0.899	0.000	0.000	0.000	0.000	0.000	0.000	0.000	0.000	0.000	0.000	0.000	0.000	0.000	0.000	80	544	56863	52492	-0.116	Error	Error	27292	29571	0	0	25285	27207	0	0	0	0
1	20	12	""	"iYFL054C"	5690	16130	110	1419	1305	653	81	903	4359	0	0	0	1489	1399	749	256	1439	5943	0	0	0	0	0	0	0	0	0	0	0	0	0	0	0	0	0	0	0	0	0	1.085	1.071	1.048	1.129	1.599	0.984	0.780	0.000	0.000	0.000	0.000	0.000	0.000	0.000	0.000	0.000	0.000	0.000	0.000	0.000	0.000	80	517	2571	2367	0.118	Error	Error	1338	1233	0	0	1224	1143	0	0	0	0
1	21	12	""	"iYFL051C-0"	5870	16140	110	16090	14362	7515	84	594	2613	82	82	0	36171	31857	15890	247	1552	6664	85	82	0	0	0	0	0	0	0	0	0	0	0	0	0	0	0	0	0	0	0	0.446	0.452	0.449	0.440	1.325	0.433	0.914	0.000	0.000	0.000	0.000	0.000	0.000	0.000	0.000	0.000	0.000	0.000	0.000	0.000	0.000	80	530	51930	45888	-1.166	Error	Error	16006	35924	0	0	14278	31610	0	0	0	0
1	22	12	""	"iYFL048C"	6070	16130	110	1846	1665	712	82	573	2533	5	0	0	1837	1765	645	251	1472	6435	0	0	0	0	0	0	0	0	0	0	0	0	0	0	0	0	0	0	0	0	0	1.112	1.046	1.065	1.038	1.398	1.058	0.850	0.000	0.000	0.000	0.000	0.000	0.000	0.000	0.000	0.000	0.000	0.000	0.000	0.000	0.000	80	570	3350	3097	0.153	Error	Error	1764	1586	0	0	1583	1514	0	0	0	0
1	1	13	""	"iYGL095C"	2080	16330	110	3585	3223	2457	70	193	821	71	63	0	3764	3395	2619	266	426	1094	65	62	0	0	0	0	0	0	0	0	0	0	0	0	0	0	0	0	0	0	0	1.005	1.008	0.963	1.146	2.261	0.939	0.877	0.000	0.000	0.000	0.000	0.000	0.000	0.000	0.000	0.000	0.000	0.000	0.000	0.000	0.000	80	552	7013	6282	0.007	Error	Error	3515	3498	0	0	3153	3129	0	0	0	0
1	2	13	""	"iYGL091C"	2270	16330	110	189	206	149	73	171	552	1	0	0	449	499	335	254	383	715	5	1	0	0	0	0	0	0	0	0	0	0	0	0	0	0	0	0	0	0	0	0.595	0.543	0.477	0.433	2.657	0.489	0.871	0.000	0.000	0.000	0.000	0.000	0.000	0.000	0.000	0.000	0.000	0.000	0.000	0.000	0.000	80	528	311	378	-0.749	Error	Error	116	195	0	0	133	245	0	0	0	0
1	3	13	""	"iYGL087C"	2460	16330	110	2521	2222	1850	76	133	321	70	63	0	1816	1681	1371	249	294	295	65	60	0	0	0	0	0	0	0	0	0	0	0	0	0	0	0	0	0	0	0	1.560	1.499	1.412	1.304	1.943	1.441	0.868	0.000	0.000	0.000	0.000	0.000	0.000	0.000	0.000	0.000	0.000	0.000	0.000	0.000	0.000	80	528	4012	3578	0.642	Error	Error	2445	1567	0	0	2146	1432	0	0	0	0
1	4	13	""	"iYGL068W"	2650	16330	110	2993	2952	2238	79	262	787	75	65	0	2143	1831	1371	252	391	656	62	57	0	0	0	0	0	0	0	0	0	0	0	0	0	0	0	0	0	0	0	1.541	1.820	1.786	2.029	2.264	1.758	0.880	0.000	0.000	0.000	0.000	0.000	0.000	0.000	0.000	0.000	0.000	0.000	0.000	0.000	0.000	80	528	4805	4452	0.624	Error	Error	2914	1891	0	0	2873	1579	0	0	0	0
1	5	13	""	"iYGL064C"	2840	16330	110	3563	3085	2269	80	268	783	68	67	0	1825	1683	1247	257	391	552	66	58	0	0	0	0	0	0	0	0	0	0	0	0	0	0	0	0	0	0	0	2.221	2.107	1.922	2.139	1.957	1.953	0.846	0.000	0.000	0.000	0.000	0.000	0.000	0.000	0.000	0.000	0.000	0.000	0.000	0.000	0.000	80	539	5051	4431	1.151	Error	Error	3483	1568	0	0	3005	1426	0	0	0	0
1	6	13	""	"iYGL060W"	3030	16330	110	2841	2659	2500	78	233	676	66	60	0	2088	1881	1663	254	376	507	58	56	0	0	0	0	0	0	0	0	0	0	0	0	0	0	0	0	0	0	0	1.507	1.586	1.438	1.595	2.291	1.508	0.900	0.000	0.000	0.000	0.000	0.000	0.000	0.000	0.000	0.000	0.000	0.000	0.000	0.000	0.000	80	526	4597	4208	0.591	Error	Error	2763	1834	0	0	2581	1627	0	0	0	0
1	7	13	""	"iYGLWdelta10"	3230	16330	100	4309	4370	2620	77	268	824	82	78	0	3602	3369	2000	253	432	762	78	77	0	0	0	0	0	0	0	0	0	0	0	0	0	0	0	0	0	0	0	1.264	1.378	1.348	1.592	1.973	1.307	0.885	0.000	0.000	0.000	0.000	0.000	0.000	0.000	0.000	0.000	0.000	0.000	0.000	0.000	0.000	80	489	7581	7409	0.338	Error	Error	4232	3349	0	0	4293	3116	0	0	0	0
1	8	13	""	"iYGL042C"	3420	16330	100	3125	2814	1539	77	290	876	81	75	0	4928	4523	2675	252	574	1271	76	75	0	0	0	0	0	0	0	0	0	0	0	0	0	0	0	0	0	0	0	0.652	0.641	0.630	0.696	1.961	0.576	0.904	0.000	0.000	0.000	0.000	0.000	0.000	0.000	0.000	0.000	0.000	0.000	0.000	0.000	0.000	80	481	7724	7008	-0.617	Error	Error	3048	4676	0	0	2737	4271	0	0	0	0
1	9	13	""	"itL(CAA)G2"	3610	16330	110	5015	4249	2114	78	324	981	81	78	0	5991	4959	2717	247	642	1486	80	75	0	0	0	0	0	0	0	0	0	0	0	0	0	0	0	0	0	0	0	0.860	0.885	0.870	1.037	1.945	0.821	0.883	0.000	0.000	0.000	0.000	0.000	0.000	0.000	0.000	0.000	0.000	0.000	0.000	0.000	0.000	80	516	10681	8883	-0.218	Error	Error	4937	5744	0	0	4171	4712	0	0	0	0
1	10	13	""	"iYGL026C"	3780	16330	90	1203	2870	4189	87	417	1105	51	40	0	796	2003	2844	252	603	1299	44	21	0	0	0	0	0	0	0	0	0	0	0	0	0	0	0	0	0	0	0	2.051	1.589	1.293	0.880	4.478	1.424	0.768	0.000	0.000	0.000	0.000	0.000	0.000	0.000	0.000	0.000	0.000	0.000	0.000	0.000	0.000	52	392	1660	4534	1.037	Error	Error	1116	544	0	0	2783	1751	0	0	0	0
1	11	13	""	"iYGL021W"	3990	16330	100	881	852	663	81	156	367	67	57	0	1689	1536	1144	257	324	332	71	66	0	0	0	0	0	0	0	0	0	0	0	0	0	0	0	0	0	0	0	0.559	0.603	0.557	0.497	2.758	0.538	0.834	0.000	0.000	0.000	0.000	0.000	0.000	0.000	0.000	0.000	0.000	0.000	0.000	0.000	0.000	80	494	2232	2050	-0.840	Error	Error	800	1432	0	0	771	1279	0	0	0	0
1	12	13	""	"iYGL017W"	4180	16340	110	2768	2349	1406	84	223	598	78	70	0	2349	1939	1193	282	413	530	73	65	0	0	0	0	0	0	0	0	0	0	0	0	0	0	0	0	0	0	0	1.299	1.367	1.326	1.238	2.295	1.233	0.847	0.000	0.000	0.000	0.000	0.000	0.000	0.000	0.000	0.000	0.000	0.000	0.000	0.000	0.000	80	539	4751	3922	0.377	Error	Error	2684	2067	0	0	2265	1657	0	0	0	0
1	13	13	""	"iYGR269W"	4370	16330	110	3058	2753	1443	93	233	585	82	77	0	2165	1828	1048	312	435	510	76	71	0	0	0	0	0	0	0	0	0	0	0	0	0	0	0	0	0	0	0	1.600	1.755	1.696	1.749	2.254	1.552	0.880	0.000	0.000	0.000	0.000	0.000	0.000	0.000	0.000	0.000	0.000	0.000	0.000	0.000	0.000	80	528	4818	4176	0.678	Error	Error	2965	1853	0	0	2660	1516	0	0	0	0
1	14	13	""	"iYGR273C"	4570	16330	110	2850	2703	1671	81	155	477	81	76	0	8085	7587	4731	266	357	528	85	83	0	0	0	0	0	0	0	0	0	0	0	0	0	0	0	0	0	0	0	0.354	0.358	0.348	0.357	1.739	0.335	0.907	0.000	0.000	0.000	0.000	0.000	0.000	0.000	0.000	0.000	0.000	0.000	0.000	0.000	0.000	80	539	10588	9943	-1.498	Error	Error	2769	7819	0	0	2622	7321	0	0	0	0
1	15	13	""	"iYGR277C"	4750	16330	110	2454	2260	1291	84	131	299	85	81	0	1689	1553	861	268	352	527	73	66	0	0	0	0	0	0	0	0	0	0	0	0	0	0	0	0	0	0	0	1.668	1.693	1.586	1.518	2.109	1.475	0.724	0.000	0.000	0.000	0.000	0.000	0.000	0.000	0.000	0.000	0.000	0.000	0.000	0.000	0.000	80	534	3791	3461	0.738	Error	Error	2370	1421	0	0	2176	1285	0	0	0	0
1	16	13	""	"iYGR292W-0"	4960	16330	110	4479	4532	2925	87	145	310	91	86	0	3772	3556	2140	273	339	415	87	83	0	0	0	0	0	0	0	0	0	0	0	0	0	0	0	0	0	0	0	1.255	1.354	1.316	1.447	1.631	1.362	0.891	0.000	0.000	0.000	0.000	0.000	0.000	0.000	0.000	0.000	0.000	0.000	0.000	0.000	0.000	80	524	7891	7728	0.328	Error	Error	4392	3499	0	0	4445	3283	0	0	0	0
1	17	13	""	"iYGR295C-1"	5130	16330	110	21273	20658	12933	84	599	3192	85	81	0	26033	23916	15248	261	1087	4744	78	77	0	0	0	0	0	0	0	0	0	0	0	0	0	0	0	0	0	0	0	0.822	0.870	0.845	0.893	1.623	0.822	0.915	0.000	0.000	0.000	0.000	0.000	0.000	0.000	0.000	0.000	0.000	0.000	0.000	0.000	0.000	80	512	46961	44229	-0.282	Error	Error	21189	25772	0	0	20574	23655	0	0	0	0
1	18	13	""	"iYHL048W"	5320	16330	110	2751	3106	2248	82	578	3132	38	13	0	5531	5952	4610	267	1091	4653	57	15	0	0	0	0	0	0	0	0	0	0	0	0	0	0	0	0	0	0	0	0.507	0.532	0.501	0.560	2.065	0.438	0.851	0.000	0.000	0.000	0.000	0.000	0.000	0.000	0.000	0.000	0.000	0.000	0.000	0.000	0.000	80	530	7933	8709	-0.980	Error	Error	2669	5264	0	0	3024	5685	0	0	0	0
1	19	13	""	"iYHL034C"	5510	16330	110	1369	1510	1091	82	207	1190	55	15	0	1382	1511	1038	269	484	1886	23	3	0	0	0	0	0	0	0	0	0	0	0	0	0	0	0	0	0	0	0	1.156	1.150	1.065	1.280	2.047	1.030	0.829	0.000	0.000	0.000	0.000	0.000	0.000	0.000	0.000	0.000	0.000	0.000	0.000	0.000	0.000	80	549	2400	2670	0.210	Error	Error	1287	1113	0	0	1428	1242	0	0	0	0
1	20	13	""	"iYHL030W"	5710	16330	110	1968	1659	837	80	144	300	85	81	0	7239	6502	3243	252	419	913	88	86	0	0	0	0	0	0	0	0	0	0	0	0	0	0	0	0	0	0	0	0.270	0.253	0.258	0.254	1.421	0.240	0.910	0.000	0.000	0.000	0.000	0.000	0.000	0.000	0.000	0.000	0.000	0.000	0.000	0.000	0.000	80	551	8875	7829	-1.888	Error	Error	1888	6987	0	0	1579	6250	0	0	0	0
1	21	13	""	"iYHL026C"	5900	16330	110	3619	3517	1881	85	243	1143	85	75	0	4838	4408	2353	252	653	2700	70	28	0	0	0	0	0	0	0	0	0	0	0	0	0	0	0	0	0	0	0	0.771	0.826	0.838	0.890	1.809	0.792	0.911	0.000	0.000	0.000	0.000	0.000	0.000	0.000	0.000	0.000	0.000	0.000	0.000	0.000	0.000	80	540	8120	7588	-0.376	Error	Error	3534	4586	0	0	3432	4156	0	0	0	0
1	22	13	""	"iYHL011C"	6090	16330	110	2734	2590	1358	85	221	590	88	80	0	2875	2573	1279	256	451	819	82	73	0	0	0	0	0	0	0	0	0	0	0	0	0	0	0	0	0	0	0	1.011	1.081	1.088	1.106	1.831	1.024	0.850	0.000	0.000	0.000	0.000	0.000	0.000	0.000	0.000	0.000	0.000	0.000	0.000	0.000	0.000	80	581	5268	4822	0.016	Error	Error	2649	2619	0	0	2505	2317	0	0	0	0
1	1	14	""	"iYHLWdelta2"	2100	16520	110	401	530	390	65	75	59	90	81	0	1317	1342	952	258	280	161	80	75	0	0	0	0	0	0	0	0	0	0	0	0	0	0	0	0	0	0	0	0.317	0.429	0.407	0.400	1.862	0.372	0.834	0.000	0.000	0.000	0.000	0.000	0.000	0.000	0.000	0.000	0.000	0.000	0.000	0.000	0.000	80	558	1395	1549	-1.656	Error	Error	336	1059	0	0	465	1084	0	0	0	0
1	2	14	""	"iYHL003C"	2280	16520	110	3579	3195	1876	75	134	427	85	83	0	5946	5126	3424	259	409	876	77	70	0	0	0	0	0	0	0	0	0	0	0	0	0	0	0	0	0	0	0	0.616	0.641	0.602	0.728	2.549	0.584	0.910	0.000	0.000	0.000	0.000	0.000	0.000	0.000	0.000	0.000	0.000	0.000	0.000	0.000	0.000	80	511	9191	7987	-0.699	Error	Error	3504	5687	0	0	3120	4867	0	0	0	0
1	3	14	""	"iYIL106W"	2480	16520	110	1672	1469	1049	79	169	478	68	65	0	2740	2506	1782	262	481	987	67	53	0	0	0	0	0	0	0	0	0	0	0	0	0	0	0	0	0	0	0	0.643	0.619	0.598	0.569	2.129	0.562	0.863	0.000	0.000	0.000	0.000	0.000	0.000	0.000	0.000	0.000	0.000	0.000	0.000	0.000	0.000	80	521	4071	3634	-0.637	Error	Error	1593	2478	0	0	1390	2244	0	0	0	0
1	4	14	""	"iYIL103W-1"	2670	16520	100	2987	2840	2173	80	174	449	77	73	0	2346	2055	1539	255	415	662	70	58	0	0	0	0	0	0	0	0	0	0	0	0	0	0	0	0	0	0	0	1.390	1.533	1.459	1.574	2.078	1.489	0.873	0.000	0.000	0.000	0.000	0.000	0.000	0.000	0.000	0.000	0.000	0.000	0.000	0.000	0.000	80	459	4998	4560	0.475	Error	Error	2907	2091	0	0	2760	1800	0	0	0	0
1	5	14	""	"iYIL100W"	2860	16530	110	1404	1631	1610	85	160	369	66	62	0	1206	1245	1193	263	341	386	57	53	0	0	0	0	0	0	0	0	0	0	0	0	0	0	0	0	0	0	0	1.399	1.574	1.408	1.398	3.081	1.430	0.907	0.000	0.000	0.000	0.000	0.000	0.000	0.000	0.000	0.000	0.000	0.000	0.000	0.000	0.000	80	495	2262	2528	0.484	Error	Error	1319	943	0	0	1546	982	0	0	0	0
1	6	14	""	"iYIL088C"	3040	16520	110	2334	2401	1982	82	201	499	67	65	0	2003	1825	1396	255	359	431	65	58	0	0	0	0	0	0	0	0	0	0	0	0	0	0	0	0	0	0	0	1.288	1.477	1.427	1.386	2.266	1.428	0.880	0.000	0.000	0.000	0.000	0.000	0.000	0.000	0.000	0.000	0.000	0.000	0.000	0.000	0.000	80	509	4000	3889	0.366	Error	Error	2252	1748	0	0	2319	1570	0	0	0	0
1	7	14	""	"itI(AAU)I2"	3240	16530	110	1906	1581	906	80	188	476	73	71	0	2867	2344	1433	253	392	560	72	70	0	0	0	0	0	0	0	0	0	0	0	0	0	0	0	0	0	0	0	0.699	0.718	0.684	0.688	2.333	0.654	0.883	0.000	0.000	0.000	0.000	0.000	0.000	0.000	0.000	0.000	0.000	0.000	0.000	0.000	0.000	80	548	4440	3592	-0.518	Error	Error	1826	2614	0	0	1501	2091	0	0	0	0
1	8	14	""	"iYIL076W"	3430	16530	110	2069	1939	1338	79	123	232	77	72	0	8741	7837	5546	258	415	902	76	75	0	0	0	0	0	0	0	0	0	0	0	0	0	0	0	0	0	0	0	0.235	0.245	0.253	0.306	2.516	0.230	0.919	0.000	0.000	0.000	0.000	0.000	0.000	0.000	0.000	0.000	0.000	0.000	0.000	0.000	0.000	80	538	10473	9439	-2.092	Error	Error	1990	8483	0	0	1860	7579	0	0	0	0
1	9	14	""	"iYIL057C"	3620	16520	110	2248	2133	1354	79	152	448	80	70	0	2487	2219	1458	267	432	971	71	55	0	0	0	0	0	0	0	0	0	0	0	0	0	0	0	0	0	0	0	0.977	1.052	1.012	1.023	2.342	0.987	0.855	0.000	0.000	0.000	0.000	0.000	0.000	0.000	0.000	0.000	0.000	0.000	0.000	0.000	0.000	80	538	4389	4006	-0.034	Error	Error	2169	2220	0	0	2054	1952	0	0	0	0
1	10	14	""	"iYIL054W"	3820	16530	110	1358	1186	798	83	177	403	72	67	0	1167	1050	756	264	353	387	63	58	0	0	0	0	0	0	0	0	0	0	0	0	0	0	0	0	0	0	0	1.412	1.403	1.276	1.112	2.899	1.243	0.775	0.000	0.000	0.000	0.000	0.000	0.000	0.000	0.000	0.000	0.000	0.000	0.000	0.000	0.000	80	524	2178	1889	0.498	Error	Error	1275	903	0	0	1103	786	0	0	0	0
1	11	14	""	"iYIL050W"	4000	16520	110	1758	1740	1249	80	129	231	81	76	0	1306	1203	729	268	321	338	73	68	0	0	0	0	0	0	0	0	0	0	0	0	0	0	0	0	0	0	0	1.617	1.775	1.658	1.648	2.276	1.709	0.839	0.000	0.000	0.000	0.000	0.000	0.000	0.000	0.000	0.000	0.000	0.000	0.000	0.000	0.000	80	504	2716	2595	0.693	Error	Error	1678	1038	0	0	1660	935	0	0	0	0
1	12	14	""	"iYIL034C"	4180	16530	110	3285	2913	1789	88	181	437	78	77	0	2206	1880	1101	284	356	373	75	70	0	0	0	0	0	0	0	0	0	0	0	0	0	0	0	0	0	0	0	1.663	1.770	1.617	1.700	2.101	1.742	0.868	0.000	0.000	0.000	0.000	0.000	0.000	0.000	0.000	0.000	0.000	0.000	0.000	0.000	0.000	80	531	5119	4421	0.734	Error	Error	3197	1922	0	0	2825	1596	0	0	0	0
1	13	14	""	"iYIL030C"	4400	16520	110	1977	1620	964	93	172	382	77	70	0	1920	1653	938	302	363	322	76	72	0	0	0	0	0	0	0	0	0	0	0	0	0	0	0	0	0	0	0	1.164	1.130	1.140	1.198	1.513	1.085	0.875	0.000	0.000	0.000	0.000	0.000	0.000	0.000	0.000	0.000	0.000	0.000	0.000	0.000	0.000	80	560	3502	2878	0.220	Error	Error	1884	1618	0	0	1527	1351	0	0	0	0
1	14	14	""	"iYIL028W"	4590	16530	110	5300	5215	3714	83	140	328	88	80	0	11076	10289	7513	255	339	454	85	80	0	0	0	0	0	0	0	0	0	0	0	0	0	0	0	0	0	0	0	0.482	0.511	0.527	0.623	2.097	0.495	0.943	0.000	0.000	0.000	0.000	0.000	0.000	0.000	0.000	0.000	0.000	0.000	0.000	0.000	0.000	80	509	16038	15166	-1.053	Error	Error	5217	10821	0	0	5132	10034	0	0	0	0
1	15	14	""	"iYJL006C"	4760	16520	110	930	840	436	83	129	217	78	72	0	1555	1404	716	268	351	352	82	68	0	0	0	0	0	0	0	0	0	0	0	0	0	0	0	0	0	0	0	0.658	0.666	0.690	0.670	2.053	0.572	0.819	0.000	0.000	0.000	0.000	0.000	0.000	0.000	0.000	0.000	0.000	0.000	0.000	0.000	0.000	80	486	2134	1893	-0.604	Error	Error	847	1287	0	0	757	1136	0	0	0	0
1	16	14	""	"iYJL003W"	4950	16520	110	1426	1190	617	83	143	284	80	77	0	3568	2993	1663	255	414	671	78	73	0	0	0	0	0	0	0	0	0	0	0	0	0	0	0	0	0	0	0	0.405	0.404	0.409	0.435	2.533	0.360	0.851	0.000	0.000	0.000	0.000	0.000	0.000	0.000	0.000	0.000	0.000	0.000	0.000	0.000	0.000	80	528	4656	3845	-1.303	Error	Error	1343	3313	0	0	1107	2738	0	0	0	0
1	17	14	""	"iYJR001W"	5140	16530	110	2017	1787	911	83	168	351	86	81	0	3664	3153	1787	264	465	798	80	72	0	0	0	0	0	0	0	0	0	0	0	0	0	0	0	0	0	0	0	0.569	0.590	0.562	0.628	1.698	0.526	0.904	0.000	0.000	0.000	0.000	0.000	0.000	0.000	0.000	0.000	0.000	0.000	0.000	0.000	0.000	80	547	5334	4593	-0.814	Error	Error	1934	3400	0	0	1704	2889	0	0	0	0
1	18	14	""	"iYJR015W"	5350	16520	110	770	708	414	85	169	381	66	42	0	4470	3754	2273	286	484	838	76	71	0	0	0	0	0	0	0	0	0	0	0	0	0	0	0	0	0	0	0	0.164	0.180	0.172	0.178	1.635	0.165	0.852	0.000	0.000	0.000	0.000	0.000	0.000	0.000	0.000	0.000	0.000	0.000	0.000	0.000	0.000	80	543	4869	4091	-2.611	Error	Error	685	4184	0	0	623	3468	0	0	0	0
1	19	14	""	"iYJR021C"	5530	16530	110	775	721	378	84	122	170	82	76	0	1186	1070	534	277	373	501	73	41	0	0	0	0	0	0	0	0	0	0	0	0	0	0	0	0	0	0	0	0.760	0.803	0.755	0.688	2.223	0.484	0.510	0.000	0.000	0.000	0.000	0.000	0.000	0.000	0.000	0.000	0.000	0.000	0.000	0.000	0.000	80	526	1600	1430	-0.396	Error	Error	691	909	0	0	637	793	0	0	0	0
1	20	14	""	"iYJR031C"	5740	16520	110	3326	2607	1384	76	142	296	98	85	0	2669	2379	1054	245	335	478	92	77	0	0	0	0	0	0	0	0	0	0	0	0	0	0	0	0	0	0	0	1.341	1.186	1.185	1.119	1.432	1.228	0.910	0.000	0.000	0.000	0.000	0.000	0.000	0.000	0.000	0.000	0.000	0.000	0.000	0.000	0.000	80	516	5674	4665	0.423	Error	Error	3250	2424	0	0	2531	2134	0	0	0	0
1	21	14	""	"itS(AGA)J"	5900	16530	110	3908	3385	1714	79	260	756	85	82	0	5305	4558	2314	253	533	1162	82	76	0	0	0	0	0	0	0	0	0	0	0	0	0	0	0	0	0	0	0	0.758	0.768	0.776	0.752	1.581	0.728	0.911	0.000	0.000	0.000	0.000	0.000	0.000	0.000	0.000	0.000	0.000	0.000	0.000	0.000	0.000	80	476	8881	7611	-0.400	Error	Error	3829	5052	0	0	3306	4305	0	0	0	0
1	22	14	""	"iYJR050W"	6090	16530	110	2363	2423	1524	88	285	786	81	73	0	1834	1713	1059	258	512	1075	63	20	0	0	0	0	0	0	0	0	0	0	0	0	0	0	0	0	0	0	0	1.444	1.605	1.509	1.620	1.616	1.315	0.739	0.000	0.000	0.000	0.000	0.000	0.000	0.000	0.000	0.000	0.000	0.000	0.000	0.000	0.000	80	562	3851	3790	0.530	Error	Error	2275	1576	0	0	2335	1455	0	0	0	0
1	1	15	""	"iYJR052W"	2100	16720	110	1237	1106	564	69	89	166	87	78	0	1347	1230	585	262	301	356	81	71	0	0	0	0	0	0	0	0	0	0	0	0	0	0	0	0	0	0	0	1.076	1.071	1.067	1.106	1.804	0.989	0.858	0.000	0.000	0.000	0.000	0.000	0.000	0.000	0.000	0.000	0.000	0.000	0.000	0.000	0.000	80	568	2253	2005	0.106	Error	Error	1168	1085	0	0	1037	968	0	0	0	0
1	2	15	""	"iYJR063W"	2310	16710	120	4064	3397	2561	77	127	342	79	73	0	2528	2267	1681	262	345	613	69	60	0	0	0	0	0	0	0	0	0	0	0	0	0	0	0	0	0	0	0	1.759	1.656	1.572	1.530	2.080	1.631	0.866	0.000	0.000	0.000	0.000	0.000	0.000	0.000	0.000	0.000	0.000	0.000	0.000	0.000	0.000	120	572	6253	5325	0.815	Error	Error	3987	2266	0	0	3320	2005	0	0	0	0
1	3	15	""	"iYJR067C"	2490	16710	120	1266	1243	1134	77	108	177	65	62	0	2190	2320	2146	265	336	349	61	58	0	0	0	0	0	0	0	0	0	0	0	0	0	0	0	0	0	0	0	0.618	0.567	0.495	0.470	2.443	0.517	0.883	0.000	0.000	0.000	0.000	0.000	0.000	0.000	0.000	0.000	0.000	0.000	0.000	0.000	0.000	120	535	3114	3221	-0.695	Error	Error	1189	1925	0	0	1166	2055	0	0	0	0
1	4	15	""	"iYJR072C"	2680	16710	120	664	628	427	84	105	195	70	58	0	917	824	533	266	312	246	68	57	0	0	0	0	0	0	0	0	0	0	0	0	0	0	0	0	0	0	0	0.891	0.975	0.891	0.792	2.832	0.822	0.743	0.000	0.000	0.000	0.000	0.000	0.000	0.000	0.000	0.000	0.000	0.000	0.000	0.000	0.000	120	526	1231	1102	-0.167	Error	Error	580	651	0	0	544	558	0	0	0	0
1	5	15	""	"itV(AAC)K2"	2860	16710	120	3653	2879	2223	89	137	326	75	68	0	6570	5688	4610	272	335	354	70	67	0	0	0	0	0	0	0	0	0	0	0	0	0	0	0	0	0	0	0	0.566	0.515	0.554	0.668	2.147	0.466	0.889	0.000	0.000	0.000	0.000	0.000	0.000	0.000	0.000	0.000	0.000	0.000	0.000	0.000	0.000	120	514	9862	8206	-0.821	Error	Error	3564	6298	0	0	2790	5416	0	0	0	0
1	6	15	""	"iYKL027W"	3050	16710	120	3155	2839	2221	83	136	316	77	74	0	10909	9761	7652	254	337	395	83	74	0	0	0	0	0	0	0	0	0	0	0	0	0	0	0	0	0	0	0	0.288	0.290	0.285	0.324	2.227	0.272	0.885	0.000	0.000	0.000	0.000	0.000	0.000	0.000	0.000	0.000	0.000	0.000	0.000	0.000	0.000	120	552	13727	12263	-1.794	Error	Error	3072	10655	0	0	2756	9507	0	0	0	0
1	7	15	""	"iYKL023W"	3230	16720	110	1164	1379	1212	76	128	282	67	62	0	1824	1868	1621	250	351	455	61	56	0	0	0	0	0	0	0	0	0	0	0	0	0	0	0	0	0	0	0	0.691	0.805	0.754	0.717	2.150	0.741	0.881	0.000	0.000	0.000	0.000	0.000	0.000	0.000	0.000	0.000	0.000	0.000	0.000	0.000	0.000	80	473	2662	2921	-0.533	Error	Error	1088	1574	0	0	1303	1618	0	0	0	0
1	8	15	""	"iYKL007W"	3410	16720	110	1206	1043	778	75	145	311	67	61	0	1900	1780	1405	256	388	561	65	56	0	0	0	0	0	0	0	0	0	0	0	0	0	0	0	0	0	0	0	0.688	0.635	0.556	0.495	2.497	0.548	0.858	0.000	0.000	0.000	0.000	0.000	0.000	0.000	0.000	0.000	0.000	0.000	0.000	0.000	0.000	80	504	2775	2492	-0.540	Error	Error	1131	1644	0	0	968	1524	0	0	0	0
1	9	15	""	"iYKL004W"	3600	16710	100	2871	2329	1360	78	179	492	77	73	0	9517	7508	4950	259	701	2118	72	66	0	0	0	0	0	0	0	0	0	0	0	0	0	0	0	0	0	0	0	0.302	0.311	0.304	0.344	2.169	0.271	0.895	0.000	0.000	0.000	0.000	0.000	0.000	0.000	0.000	0.000	0.000	0.000	0.000	0.000	0.000	80	482	12051	9500	-1.729	Error	Error	2793	9258	0	0	2251	7249	0	0	0	0
1	10	15	""	"iCEN11"	3800	16700	110	1545	1358	790	78	156	457	77	68	0	8993	7191	4766	264	649	2044	71	70	0	0	0	0	0	0	0	0	0	0	0	0	0	0	0	0	0	0	0	0.168	0.185	0.187	0.244	2.293	0.164	0.895	0.000	0.000	0.000	0.000	0.000	0.000	0.000	0.000	0.000	0.000	0.000	0.000	0.000	0.000	80	512	10196	8207	-2.573	Error	Error	1467	8729	0	0	1280	6927	0	0	0	0
1	11	15	""	"iYKR015C"	3980	16710	110	5977	5016	2943	77	152	545	86	78	0	6752	5698	3391	257	428	1006	76	73	0	0	0	0	0	0	0	0	0	0	0	0	0	0	0	0	0	0	0	0.908	0.908	0.959	1.151	2.162	0.883	0.893	0.000	0.000	0.000	0.000	0.000	0.000	0.000	0.000	0.000	0.000	0.000	0.000	0.000	0.000	80	504	12395	10380	-0.139	Error	Error	5900	6495	0	0	4939	5441	0	0	0	0
1	12	15	""	"iYKR019C"	4160	16710	100	2836	2258	1262	82	209	650	76	73	0	2050	1733	1050	279	475	1038	68	33	0	0	0	0	0	0	0	0	0	0	0	0	0	0	0	0	0	0	0	1.555	1.497	1.446	1.573	1.842	1.386	0.846	0.000	0.000	0.000	0.000	0.000	0.000	0.000	0.000	0.000	0.000	0.000	0.000	0.000	0.000	80	461	4525	3630	0.637	Error	Error	2754	1771	0	0	2176	1454	0	0	0	0
1	13	15	""	"iYKR023W"	4360	16710	100	1426	1194	622	84	138	327	80	73	0	5895	4819	2702	284	396	610	80	78	0	0	0	0	0	0	0	0	0	0	0	0	0	0	0	0	0	0	0	0.239	0.245	0.252	0.294	1.974	0.223	0.890	0.000	0.000	0.000	0.000	0.000	0.000	0.000	0.000	0.000	0.000	0.000	0.000	0.000	0.000	80	474	6953	5645	-2.064	Error	Error	1342	5611	0	0	1110	4535	0	0	0	0
1	14	15	""	"iYKRCdelta11"	4540	16710	110	3564	3404	2124	76	187	597	81	78	0	3332	3005	1806	257	422	753	81	72	0	0	0	0	0	0	0	0	0	0	0	0	0	0	0	0	0	0	0	1.134	1.211	1.153	1.245	1.601	1.121	0.779	0.000	0.000	0.000	0.000	0.000	0.000	0.000	0.000	0.000	0.000	0.000	0.000	0.000	0.000	80	519	6563	6076	0.182	Error	Error	3488	3075	0	0	3328	2748	0	0	0	0
1	15	15	""	"iYKR042W"	4750	16710	120	1334	1257	688	78	179	564	76	58	0	3742	3285	1785	251	370	585	84	78	0	0	0	0	0	0	0	0	0	0	0	0	0	0	0	0	0	0	0	0.360	0.389	0.396	0.404	1.881	0.372	0.879	0.000	0.000	0.000	0.000	0.000	0.000	0.000	0.000	0.000	0.000	0.000	0.000	0.000	0.000	120	590	4747	4213	-1.475	Error	Error	1256	3491	0	0	1179	3034	0	0	0	0
1	16	15	""	"iYKR046C"	4930	16710	110	1339	1177	657	76	94	113	85	81	0	1404	1182	674	238	281	249	78	71	0	0	0	0	0	0	0	0	0	0	0	0	0	0	0	0	0	0	0	1.083	1.166	1.213	1.195	1.906	1.066	0.852	0.000	0.000	0.000	0.000	0.000	0.000	0.000	0.000	0.000	0.000	0.000	0.000	0.000	0.000	80	484	2429	2045	0.115	Error	Error	1263	1166	0	0	1101	944	0	0	0	0
1	17	15	""	"iYLR167W"	5110	16710	110	876	763	391	77	111	178	82	75	0	1102	991	493	243	300	271	77	73	0	0	0	0	0	0	0	0	0	0	0	0	0	0	0	0	0	0	0	0.930	0.917	0.868	0.865	1.993	0.833	0.823	0.000	0.000	0.000	0.000	0.000	0.000	0.000	0.000	0.000	0.000	0.000	0.000	0.000	0.000	80	506	1658	1434	-0.104	Error	Error	799	859	0	0	686	748	0	0	0	0
1	18	15	""	"iYLR173W"	5300	16710	110	2825	2460	1241	84	210	569	83	81	0	2071	1765	1004	274	379	443	76	72	0	0	0	0	0	0	0	0	0	0	0	0	0	0	0	0	0	0	0	1.525	1.594	1.610	1.845	2.281	1.496	0.870	0.000	0.000	0.000	0.000	0.000	0.000	0.000	0.000	0.000	0.000	0.000	0.000	0.000	0.000	80	534	4538	3867	0.609	Error	Error	2741	1797	0	0	2376	1491	0	0	0	0
1	19	15	""	"iYLR177W"	5490	16700	110	1280	1179	778	87	232	598	68	48	0	1971	1891	1341	280	443	612	70	58	0	0	0	0	0	0	0	0	0	0	0	0	0	0	0	0	0	0	0	0.705	0.678	0.618	0.615	1.856	0.676	0.814	0.000	0.000	0.000	0.000	0.000	0.000	0.000	0.000	0.000	0.000	0.000	0.000	0.000	0.000	80	519	2884	2703	-0.503	Error	Error	1193	1691	0	0	1092	1611	0	0	0	0
1	20	15	""	"iYLR193C"	5680	16710	110	2169	1837	967	79	176	411	80	77	0	1603	1398	757	250	364	453	76	70	0	0	0	0	0	0	0	0	0	0	0	0	0	0	0	0	0	0	0	1.545	1.531	1.518	1.413	1.719	1.406	0.823	0.000	0.000	0.000	0.000	0.000	0.000	0.000	0.000	0.000	0.000	0.000	0.000	0.000	0.000	80	522	3443	2906	0.627	Error	Error	2090	1353	0	0	1758	1148	0	0	0	0
1	21	15	""	"iYLR198C"	5870	16700	110	1120	967	542	80	190	481	71	56	0	4018	3302	2002	246	453	826	76	71	0	0	0	0	0	0	0	0	0	0	0	0	0	0	0	0	0	0	0	0.276	0.290	0.284	0.311	2.219	0.268	0.827	0.000	0.000	0.000	0.000	0.000	0.000	0.000	0.000	0.000	0.000	0.000	0.000	0.000	0.000	80	510	4812	3943	-1.859	Error	Error	1040	3772	0	0	887	3056	0	0	0	0
1	22	15	""	"iYLR204W"	6050	16710	110	1379	1227	659	87	161	313	80	75	0	1201	1062	603	255	420	740	61	10	0	0	0	0	0	0	0	0	0	0	0	0	0	0	0	0	0	0	0	1.366	1.413	1.348	1.348	2.004	0.835	0.482	0.000	0.000	0.000	0.000	0.000	0.000	0.000	0.000	0.000	0.000	0.000	0.000	0.000	0.000	80	542	2238	1947	0.450	Error	Error	1292	946	0	0	1140	807	0	0	0	0
1	1	16	""	"iYLR221C"	2070	16900	110	1979	2000	1956	72	148	401	60	56	0	2345	3158	3194	265	437	912	57	52	0	0	0	0	0	0	0	0	0	0	0	0	0	0	0	0	0	0	0	0.917	0.666	0.585	0.627	3.039	0.590	0.879	0.000	0.000	0.000	0.000	0.000	0.000	0.000	0.000	0.000	0.000	0.000	0.000	0.000	0.000	80	510	3987	4821	-0.125	Error	Error	1907	2080	0	0	1928	2893	0	0	0	0
1	2	16	""	"iYLR225C"	2260	16900	110	2390	2133	1401	78	203	513	76	72	0	1745	1584	1041	275	496	964	66	32	0	0	0	0	0	0	0	0	0	0	0	0	0	0	0	0	0	0	0	1.573	1.570	1.458	1.443	2.358	1.358	0.736	0.000	0.000	0.000	0.000	0.000	0.000	0.000	0.000	0.000	0.000	0.000	0.000	0.000	0.000	80	507	3782	3364	0.653	Error	Error	2312	1470	0	0	2055	1309	0	0	0	0
1	3	16	""	"iYLRWdelta11"	2440	16900	100	1018	888	659	78	154	365	65	55	0	1608	1447	1144	266	374	471	62	58	0	0	0	0	0	0	0	0	0	0	0	0	0	0	0	0	0	0	0	0.700	0.686	0.628	0.491	3.451	0.567	0.846	0.000	0.000	0.000	0.000	0.000	0.000	0.000	0.000	0.000	0.000	0.000	0.000	0.000	0.000	80	474	2282	1991	-0.514	Error	Error	940	1342	0	0	810	1181	0	0	0	0
1	4	16	""	"iYLR244C"	2650	16900	110	864	768	504	85	113	168	72	67	0	1162	1016	655	269	351	515	66	38	0	0	0	0	0	0	0	0	0	0	0	0	0	0	0	0	0	0	0	0.872	0.914	0.829	0.789	1.751	0.811	0.806	0.000	0.000	0.000	0.000	0.000	0.000	0.000	0.000	0.000	0.000	0.000	0.000	0.000	0.000	80	530	1672	1430	-0.197	Error	Error	779	893	0	0	683	747	0	0	0	0
1	5	16	""	"iYLR247C"	2830	16900	110	5793	5686	3808	95	182	528	86	82	0	2846	2655	1677	276	340	374	80	77	0	0	0	0	0	0	0	0	0	0	0	0	0	0	0	0	0	0	0	2.217	2.350	2.230	2.562	1.726	2.318	0.878	0.000	0.000	0.000	0.000	0.000	0.000	0.000	0.000	0.000	0.000	0.000	0.000	0.000	0.000	80	513	8268	7970	1.149	Error	Error	5698	2570	0	0	5591	2379	0	0	0	0
1	6	16	""	"iYLR252W"	3020	16900	110	2691	2438	1565	85	221	613	76	72	0	2325	2032	1333	260	367	517	73	70	0	0	0	0	0	0	0	0	0	0	0	0	0	0	0	0	0	0	0	1.262	1.328	1.294	1.386	1.991	1.279	0.861	0.000	0.000	0.000	0.000	0.000	0.000	0.000	0.000	0.000	0.000	0.000	0.000	0.000	0.000	80	523	4671	4125	0.336	Error	Error	2606	2065	0	0	2353	1772	0	0	0	0
1	7	16	""	"iYML046W"	3220	16900	110	1017	928	590	78	156	359	70	67	0	2089	1791	1174	253	371	499	71	67	0	0	0	0	0	0	0	0	0	0	0	0	0	0	0	0	0	0	0	0.511	0.553	0.539	0.472	1.936	0.497	0.845	0.000	0.000	0.000	0.000	0.000	0.000	0.000	0.000	0.000	0.000	0.000	0.000	0.000	0.000	80	538	2775	2388	-0.967	Error	Error	939	1836	0	0	850	1538	0	0	0	0
1	8	16	""	"iYML042W"	3410	16900	110	1538	1317	761	78	113	165	80	77	0	1538	1374	849	241	319	357	73	70	0	0	0	0	0	0	0	0	0	0	0	0	0	0	0	0	0	0	0	1.126	1.094	1.096	0.998	2.053	0.953	0.835	0.000	0.000	0.000	0.000	0.000	0.000	0.000	0.000	0.000	0.000	0.000	0.000	0.000	0.000	80	527	2757	2372	0.171	Error	Error	1460	1297	0	0	1239	1133	0	0	0	0
1	9	16	""	"iYML038C"	3600	16900	110	344	366	223	78	113	176	65	32	0	707	654	326	244	322	613	26	0	0	0	0	0	0	0	0	0	0	0	0	0	0	0	0	0	0	0	0	0.575	0.702	0.610	0.548	2.252	0.591	0.692	0.000	0.000	0.000	0.000	0.000	0.000	0.000	0.000	0.000	0.000	0.000	0.000	0.000	0.000	80	528	729	698	-0.800	Error	Error	266	463	0	0	288	410	0	0	0	0
1	10	16	""	"iYML021C"	3790	16900	100	4593	3920	2327	81	140	225	88	85	0	3396	2982	1973	255	334	361	77	75	0	0	0	0	0	0	0	0	0	0	0	0	0	0	0	0	0	0	0	1.436	1.408	1.328	1.482	2.474	1.285	0.898	0.000	0.000	0.000	0.000	0.000	0.000	0.000	0.000	0.000	0.000	0.000	0.000	0.000	0.000	80	482	7653	6566	0.523	Error	Error	4512	3141	0	0	3839	2727	0	0	0	0
1	11	16	""	"iYML017W"	3980	16900	110	970	964	616	83	136	232	81	77	0	3759	3491	2568	260	410	689	75	73	0	0	0	0	0	0	0	0	0	0	0	0	0	0	0	0	0	0	0	0.254	0.273	0.275	0.307	2.605	0.228	0.854	0.000	0.000	0.000	0.000	0.000	0.000	0.000	0.000	0.000	0.000	0.000	0.000	0.000	0.000	80	550	4386	4112	-1.980	Error	Error	887	3499	0	0	881	3231	0	0	0	0
1	12	16	""	"iYML013C-A"	4180	16900	110	2629	2104	1291	87	154	251	82	76	0	1693	1421	882	276	428	652	68	57	0	0	0	0	0	0	0	0	0	0	0	0	0	0	0	0	0	0	0	1.794	1.762	1.708	1.726	1.895	1.622	0.826	0.000	0.000	0.000	0.000	0.000	0.000	0.000	0.000	0.000	0.000	0.000	0.000	0.000	0.000	80	549	3959	3162	0.843	Error	Error	2542	1417	0	0	2017	1145	0	0	0	0
1	13	16	""	"iYMR002W"	4370	16900	100	1487	1312	724	88	161	278	82	76	0	2786	2431	1397	284	385	411	80	76	0	0	0	0	0	0	0	0	0	0	0	0	0	0	0	0	0	0	0	0.559	0.570	0.540	0.494	1.968	0.524	0.878	0.000	0.000	0.000	0.000	0.000	0.000	0.000	0.000	0.000	0.000	0.000	0.000	0.000	0.000	80	482	3901	3371	-0.839	Error	Error	1399	2502	0	0	1224	2147	0	0	0	0
1	14	16	""	"iYMR006C"	4560	16900	110	2278	1895	1010	82	159	352	82	78	0	5706	4886	3086	269	496	1013	73	72	0	0	0	0	0	0	0	0	0	0	0	0	0	0	0	0	0	0	0	0.404	0.393	0.366	0.403	1.953	0.336	0.887	0.000	0.000	0.000	0.000	0.000	0.000	0.000	0.000	0.000	0.000	0.000	0.000	0.000	0.000	80	549	7633	6430	-1.308	Error	Error	2196	5437	0	0	1813	4617	0	0	0	0
1	15	16	""	"iYMR010W-0"	4760	16900	110	2273	2395	1182	81	174	427	92	85	0	4908	4892	2405	265	559	1231	91	83	0	0	0	0	0	0	0	0	0	0	0	0	0	0	0	0	0	0	0	0.472	0.500	0.481	0.482	1.388	0.482	0.917	0.000	0.000	0.000	0.000	0.000	0.000	0.000	0.000	0.000	0.000	0.000	0.000	0.000	0.000	80	519	6835	6941	-1.083	Error	Error	2192	4643	0	0	2314	4627	0	0	0	0
1	16	16	""	"iYMR021C"	4940	16900	100	1990	1792	820	83	179	416	85	82	0	4326	3889	1859	273	530	994	85	81	0	0	0	0	0	0	0	0	0	0	0	0	0	0	0	0	0	0	0	0.471	0.473	0.464	0.489	1.574	0.425	0.890	0.000	0.000	0.000	0.000	0.000	0.000	0.000	0.000	0.000	0.000	0.000	0.000	0.000	0.000	80	462	5960	5325	-1.088	Error	Error	1907	4053	0	0	1709	3616	0	0	0	0
1	17	16	""	"iYMR024W"	5130	16900	110	2326	1980	1011	85	193	403	85	80	0	2741	2278	1182	274	480	715	77	72	0	0	0	0	0	0	0	0	0	0	0	0	0	0	0	0	0	0	0	0.908	0.946	0.933	0.988	2.159	0.839	0.827	0.000	0.000	0.000	0.000	0.000	0.000	0.000	0.000	0.000	0.000	0.000	0.000	0.000	0.000	80	539	4708	3899	-0.139	Error	Error	2241	2467	0	0	1895	2004	0	0	0	0
1	18	16	""	"iYMR029C"	5320	16900	110	5398	5184	2594	88	296	819	88	86	0	7398	6709	3644	274	583	1240	82	78	0	0	0	0	0	0	0	0	0	0	0	0	0	0	0	0	0	0	0	0.745	0.792	0.771	0.953	2.076	0.738	0.911	0.000	0.000	0.000	0.000	0.000	0.000	0.000	0.000	0.000	0.000	0.000	0.000	0.000	0.000	80	540	12434	11531	-0.424	Error	Error	5310	7124	0	0	5096	6435	0	0	0	0
1	19	16	""	"iYMR312W"	5510	16900	110	1318	1089	548	88	278	767	72	15	0	1194	1068	562	265	527	1177	32	0	0	0	0	0	0	0	0	0	0	0	0	0	0	0	0	0	0	0	0	1.324	1.247	1.212	1.205	2.770	0.696	0.657	0.000	0.000	0.000	0.000	0.000	0.000	0.000	0.000	0.000	0.000	0.000	0.000	0.000	0.000	80	546	2159	1804	0.405	Error	Error	1230	929	0	0	1001	803	0	0	0	0
1	20	16	""	"iYMR316C-A"	5710	16900	120	2734	2698	1858	83	168	296	81	78	0	4189	4040	3178	255	362	386	72	69	0	0	0	0	0	0	0	0	0	0	0	0	0	0	0	0	0	0	0	0.674	0.691	0.676	0.874	2.678	0.612	0.888	0.000	0.000	0.000	0.000	0.000	0.000	0.000	0.000	0.000	0.000	0.000	0.000	0.000	0.000	120	599	6585	6400	-0.569	Error	Error	2651	3934	0	0	2615	3785	0	0	0	0
1	21	16	""	"iYMR319C-1"	5890	16910	110	5785	5320	3075	83	338	1155	83	77	0	4225	3691	2165	256	493	925	77	71	0	0	0	0	0	0	0	0	0	0	0	0	0	0	0	0	0	0	0	1.437	1.525	1.423	1.500	2.103	1.503	0.867	0.000	0.000	0.000	0.000	0.000	0.000	0.000	0.000	0.000	0.000	0.000	0.000	0.000	0.000	80	506	9671	8672	0.523	Error	Error	5702	3969	0	0	5237	3435	0	0	0	0
1	22	16	""	"iYNL331C"	6080	16900	110	4604	4177	2419	86	409	1264	80	75	0	4205	4202	2541	253	538	1066	81	80	0	0	0	0	0	0	0	0	0	0	0	0	0	0	0	0	0	0	0	1.143	1.036	1.028	1.127	2.026	1.026	0.889	0.000	0.000	0.000	0.000	0.000	0.000	0.000	0.000	0.000	0.000	0.000	0.000	0.000	0.000	80	574	8470	8040	0.193	Error	Error	4518	3952	0	0	4091	3949	0	0	0	0
1	1	17	""	"iYNL327W"	2090	17090	110	705	604	347	71	91	164	76	71	0	1783	1386	906	261	313	390	71	63	0	0	0	0	0	0	0	0	0	0	0	0	0	0	0	0	0	0	0	0.417	0.474	0.423	0.388	2.712	0.390	0.826	0.000	0.000	0.000	0.000	0.000	0.000	0.000	0.000	0.000	0.000	0.000	0.000	0.000	0.000	80	552	2156	1658	-1.263	Error	Error	634	1522	0	0	533	1125	0	0	0	0
1	2	17	""	"iYNL322C"	2280	17090	110	2733	2600	2368	77	212	643	67	57	0	1708	1611	1400	266	385	494	58	55	0	0	0	0	0	0	0	0	0	0	0	0	0	0	0	0	0	0	0	1.842	1.876	1.805	1.730	3.281	1.743	0.875	0.000	0.000	0.000	0.000	0.000	0.000	0.000	0.000	0.000	0.000	0.000	0.000	0.000	0.000	80	528	4098	3868	0.881	Error	Error	2656	1442	0	0	2523	1345	0	0	0	0
1	3	17	""	"iYNL302C"	2470	17090	110	2716	2704	2572	81	367	954	63	55	0	1793	1770	1643	264	457	678	58	55	0	0	0	0	0	0	0	0	0	0	0	0	0	0	0	0	0	0	0	1.723	1.742	1.674	1.857	3.616	1.565	0.864	0.000	0.000	0.000	0.000	0.000	0.000	0.000	0.000	0.000	0.000	0.000	0.000	0.000	0.000	80	551	4164	4129	0.785	Error	Error	2635	1529	0	0	2623	1506	0	0	0	0
1	4	17	""	"iYNL298W"	2670	17100	110	1533	1743	1710	89	321	877	56	45	0	6098	6225	6139	281	698	2181	56	52	0	0	0	0	0	0	0	0	0	0	0	0	0	0	0	0	0	0	0	0.248	0.278	0.262	0.278	1.942	0.262	0.865	0.000	0.000	0.000	0.000	0.000	0.000	0.000	0.000	0.000	0.000	0.000	0.000	0.000	0.000	80	549	7261	7598	-2.010	Error	Error	1444	5817	0	0	1654	5944	0	0	0	0
1	5	17	""	"iYNL293W"	2860	17100	110	1990	1911	1765	92	214	414	60	53	0	1563	1609	1391	283	574	1246	50	22	0	0	0	0	0	0	0	0	0	0	0	0	0	0	0	0	0	0	0	1.483	1.372	1.260	0.977	3.135	1.234	0.742	0.000	0.000	0.000	0.000	0.000	0.000	0.000	0.000	0.000	0.000	0.000	0.000	0.000	0.000	80	516	3178	3145	0.568	Error	Error	1898	1280	0	0	1819	1326	0	0	0	0
1	6	17	""	"iYNL284C"	3040	17090	110	4469	3693	2031	85	303	813	80	77	0	4143	3428	2101	270	478	811	75	70	0	0	0	0	0	0	0	0	0	0	0	0	0	0	0	0	0	0	0	1.132	1.142	1.099	1.318	2.028	1.053	0.876	0.000	0.000	0.000	0.000	0.000	0.000	0.000	0.000	0.000	0.000	0.000	0.000	0.000	0.000	80	546	8257	6766	0.179	Error	Error	4384	3873	0	0	3608	3158	0	0	0	0
1	7	17	""	"iYNL281W"	3250	17100	110	1788	1492	981	77	256	764	68	53	0	2341	1977	1312	255	454	798	68	63	0	0	0	0	0	0	0	0	0	0	0	0	0	0	0	0	0	0	0	0.820	0.822	0.798	0.756	2.822	0.782	0.897	0.000	0.000	0.000	0.000	0.000	0.000	0.000	0.000	0.000	0.000	0.000	0.000	0.000	0.000	80	547	3797	3137	-0.286	Error	Error	1711	2086	0	0	1415	1722	0	0	0	0
1	8	17	""	"iYNL276C"	3430	17100	110	2273	2086	1413	75	179	391	77	73	0	2522	2092	1431	247	377	497	71	68	0	0	0	0	0	0	0	0	0	0	0	0	0	0	0	0	0	0	0	0.966	1.090	1.034	0.997	2.220	0.960	0.854	0.000	0.000	0.000	0.000	0.000	0.000	0.000	0.000	0.000	0.000	0.000	0.000	0.000	0.000	80	527	4473	3856	-0.050	Error	Error	2198	2275	0	0	2011	1845	0	0	0	0
1	9	17	""	"iYNR042W"	3620	17090	110	2165	1791	970	78	221	447	77	76	0	1539	1299	760	255	379	461	72	66	0	0	0	0	0	0	0	0	0	0	0	0	0	0	0	0	0	0	0	1.625	1.641	1.507	1.410	2.180	1.386	0.802	0.000	0.000	0.000	0.000	0.000	0.000	0.000	0.000	0.000	0.000	0.000	0.000	0.000	0.000	80	513	3371	2757	0.701	Error	Error	2087	1284	0	0	1713	1044	0	0	0	0
1	10	17	""	"iYNR046W"	3810	17090	110	2571	2267	1403	81	199	370	78	78	0	1892	1682	974	253	347	342	76	76	0	0	0	0	0	0	0	0	0	0	0	0	0	0	0	0	0	0	0	1.519	1.530	1.424	1.249	2.423	1.459	0.842	0.000	0.000	0.000	0.000	0.000	0.000	0.000	0.000	0.000	0.000	0.000	0.000	0.000	0.000	80	538	4129	3615	0.603	Error	Error	2490	1639	0	0	2186	1429	0	0	0	0
1	11	17	""	"iYNR050C"	4010	17100	110	2959	2863	1875	83	152	268	82	77	0	4189	3748	2383	259	355	441	78	76	0	0	0	0	0	0	0	0	0	0	0	0	0	0	0	0	0	0	0	0.732	0.797	0.761	0.705	2.474	0.760	0.876	0.000	0.000	0.000	0.000	0.000	0.000	0.000	0.000	0.000	0.000	0.000	0.000	0.000	0.000	80	550	6806	6269	-0.450	Error	Error	2876	3930	0	0	2780	3489	0	0	0	0
1	12	17	""	"iYNR063W"	4200	17100	110	3329	2797	1550	91	178	363	78	77	0	5638	4888	2816	293	472	823	77	76	0	0	0	0	0	0	0	0	0	0	0	0	0	0	0	0	0	0	0	0.606	0.589	0.605	0.726	2.627	0.546	0.871	0.000	0.000	0.000	0.000	0.000	0.000	0.000	0.000	0.000	0.000	0.000	0.000	0.000	0.000	80	539	8583	7301	-0.723	Error	Error	3238	5345	0	0	2706	4595	0	0	0	0
1	13	17	""	"iYNR068C"	4390	17100	110	2152	1822	1033	94	176	313	78	76	0	2191	1939	1147	290	464	806	72	63	0	0	0	0	0	0	0	0	0	0	0	0	0	0	0	0	0	0	0	1.083	1.048	1.032	0.856	2.170	0.982	0.852	0.000	0.000	0.000	0.000	0.000	0.000	0.000	0.000	0.000	0.000	0.000	0.000	0.000	0.000	80	539	3959	3377	0.114	Error	Error	2058	1901	0	0	1728	1649	0	0	0	0
1	14	17	""	"iYNR071C"	4580	17100	110	2989	2813	1901	87	156	301	78	76	0	5125	4691	2980	272	395	593	78	77	0	0	0	0	0	0	0	0	0	0	0	0	0	0	0	0	0	0	0	0.598	0.617	0.622	0.604	1.702	0.603	0.872	0.000	0.000	0.000	0.000	0.000	0.000	0.000	0.000	0.000	0.000	0.000	0.000	0.000	0.000	80	539	7755	7145	-0.742	Error	Error	2902	4853	0	0	2726	4419	0	0	0	0
1	15	17	""	"iYOL160W-1"	4770	17100	110	4459	3916	2432	83	190	523	80	77	0	4715	4325	2550	256	439	803	81	77	0	0	0	0	0	0	0	0	0	0	0	0	0	0	0	0	0	0	0	0.981	0.942	0.944	0.833	2.033	0.925	0.892	0.000	0.000	0.000	0.000	0.000	0.000	0.000	0.000	0.000	0.000	0.000	0.000	0.000	0.000	80	522	8835	7902	-0.027	Error	Error	4376	4459	0	0	3833	4069	0	0	0	0
1	16	17	""	"iYOL157C"	4970	17100	120	8456	7248	4727	86	218	649	89	85	0	7474	6380	4516	271	460	842	76	71	0	0	0	0	0	0	0	0	0	0	0	0	0	0	0	0	0	0	0	1.162	1.172	1.180	1.540	2.374	1.113	0.890	0.000	0.000	0.000	0.000	0.000	0.000	0.000	0.000	0.000	0.000	0.000	0.000	0.000	0.000	120	597	15573	13271	0.217	Error	Error	8370	7203	0	0	7162	6109	0	0	0	0
1	17	17	""	"iYOL155C-1"	5150	17100	110	1374	1451	1118	86	195	549	73	58	0	2029	2033	1572	279	414	651	76	62	0	0	0	0	0	0	0	0	0	0	0	0	0	0	0	0	0	0	0	0.736	0.778	0.717	0.741	1.868	0.707	0.815	0.000	0.000	0.000	0.000	0.000	0.000	0.000	0.000	0.000	0.000	0.000	0.000	0.000	0.000	80	505	3038	3119	-0.442	Error	Error	1288	1750	0	0	1365	1754	0	0	0	0
1	18	17	""	"iYOL138C"	5350	17100	110	2524	2047	1137	87	201	521	80	72	0	1823	1583	880	273	403	615	76	62	0	0	0	0	0	0	0	0	0	0	0	0	0	0	0	0	0	0	0	1.572	1.496	1.429	1.326	1.826	1.434	0.857	0.000	0.000	0.000	0.000	0.000	0.000	0.000	0.000	0.000	0.000	0.000	0.000	0.000	0.000	80	522	3987	3270	0.653	Error	Error	2437	1550	0	0	1960	1310	0	0	0	0
1	19	17	""	"iYOL133W"	5530	17100	110	2187	2328	1744	86	224	485	82	76	0	1913	1815	1294	274	387	427	76	67	0	0	0	0	0	0	0	0	0	0	0	0	0	0	0	0	0	0	0	1.282	1.455	1.325	1.423	2.694	1.356	0.862	0.000	0.000	0.000	0.000	0.000	0.000	0.000	0.000	0.000	0.000	0.000	0.000	0.000	0.000	80	515	3740	3783	0.358	Error	Error	2101	1639	0	0	2242	1541	0	0	0	0
1	20	17	""	"iYOL129W"	5720	17100	110	1946	1669	887	86	244	524	81	70	0	3006	2630	1449	280	481	713	80	71	0	0	0	0	0	0	0	0	0	0	0	0	0	0	0	0	0	0	0	0.682	0.674	0.628	0.654	2.074	0.617	0.873	0.000	0.000	0.000	0.000	0.000	0.000	0.000	0.000	0.000	0.000	0.000	0.000	0.000	0.000	80	524	4586	3933	-0.551	Error	Error	1860	2726	0	0	1583	2350	0	0	0	0
1	21	17	""	"iYOR161C"	5910	17090	110	4804	4308	2615	89	221	468	86	80	0	6832	5814	3277	265	491	735	85	77	0	0	0	0	0	0	0	0	0	0	0	0	0	0	0	0	0	0	0	0.718	0.760	0.730	0.744	1.507	0.737	0.898	0.000	0.000	0.000	0.000	0.000	0.000	0.000	0.000	0.000	0.000	0.000	0.000	0.000	0.000	80	537	11282	9768	-0.478	Error	Error	4715	6567	0	0	4219	5549	0	0	0	0
1	22	17	""	"iYOR165W"	6110	17100	110	1317	1073	662	83	146	340	75	62	0	2428	1935	1141	249	346	426	73	70	0	0	0	0	0	0	0	0	0	0	0	0	0	0	0	0	0	0	0	0.566	0.587	0.569	0.496	2.206	0.559	0.874	0.000	0.000	0.000	0.000	0.000	0.000	0.000	0.000	0.000	0.000	0.000	0.000	0.000	0.000	80	582	3413	2676	-0.820	Error	Error	1234	2179	0	0	990	1686	0	0	0	0
1	1	18	""	"iYOR172W"	2130	17290	120	2451	3549	3804	73	81	55	83	78	0	1668	3057	3325	262	281	138	63	60	0	0	0	0	0	0	0	0	0	0	0	0	0	0	0	0	0	0	0	1.691	1.244	1.126	1.157	2.717	1.168	0.864	0.000	0.000	0.000	0.000	0.000	0.000	0.000	0.000	0.000	0.000	0.000	0.000	0.000	0.000	120	619	3784	6271	0.758	Error	Error	2378	1406	0	0	3476	2795	0	0	0	0
1	2	18	""	"iYOR183W"	2300	17280	100	833	912	689	80	121	196	68	65	0	754	806	652	264	299	178	57	53	0	0	0	0	0	0	0	0	0	0	0	0	0	0	0	0	0	0	0	1.537	1.535	1.244	1.240	2.866	1.258	0.763	0.000	0.000	0.000	0.000	0.000	0.000	0.000	0.000	0.000	0.000	0.000	0.000	0.000	0.000	80	430	1243	1374	0.620	Error	Error	753	490	0	0	832	542	0	0	0	0
1	3	18	""	"iYOR187W"	2490	17290	100	2769	2502	2444	86	215	560	60	55	0	1337	1692	1618	272	366	416	55	55	0	0	0	0	0	0	0	0	0	0	0	0	0	0	0	0	0	0	0	2.519	1.701	1.403	1.177	2.851	1.595	0.869	0.000	0.000	0.000	0.000	0.000	0.000	0.000	0.000	0.000	0.000	0.000	0.000	0.000	0.000	80	469	3748	3836	1.333	Error	Error	2683	1065	0	0	2416	1420	0	0	0	0
1	4	18	""	"iYOR191W"	2680	17290	110	5127	5268	5944	89	311	970	65	62	0	13308	15075	15601	284	988	3692	57	55	2	0	0	0	0	0	0	0	0	0	0	0	0	0	0	0	0	0	0	0.387	0.350	0.334	0.458	3.292	0.335	0.886	0.000	0.000	0.000	0.000	0.000	0.000	0.000	0.000	0.000	0.000	0.000	0.000	0.000	0.000	80	496	18062	19970	-1.370	Error	Error	5038	13024	0	0	5179	14791	0	0	0	0
1	5	18	""	"iYOR208W"	2870	17280	110	1411	1709	1619	90	311	927	56	42	0	3077	4029	3934	290	1142	3728	45	21	0	0	0	0	0	0	0	0	0	0	0	0	0	0	0	0	0	0	0	0.474	0.433	0.419	0.598	4.249	0.356	0.812	0.000	0.000	0.000	0.000	0.000	0.000	0.000	0.000	0.000	0.000	0.000	0.000	0.000	0.000	80	535	4108	5358	-1.077	Error	Error	1321	2787	0	0	1619	3739	0	0	0	0
1	6	18	""	"iYOR212W"	3060	17290	110	2383	2407	2339	90	264	612	62	58	0	3118	3484	3444	280	698	1488	56	48	0	0	0	0	0	0	0	0	0	0	0	0	0	0	0	0	0	0	0	0.808	0.723	0.668	0.693	2.674	0.615	0.856	0.000	0.000	0.000	0.000	0.000	0.000	0.000	0.000	0.000	0.000	0.000	0.000	0.000	0.000	80	549	5131	5521	-0.308	Error	Error	2293	2838	0	0	2317	3204	0	0	0	0
1	7	18	""	"iYOR216C"	3250	17290	110	2228	1998	1388	86	223	509	75	67	0	1659	1501	1171	261	474	907	61	35	0	0	0	0	0	0	0	0	0	0	0	0	0	0	0	0	0	0	0	1.532	1.542	1.325	1.438	2.586	1.322	0.770	0.000	0.000	0.000	0.000	0.000	0.000	0.000	0.000	0.000	0.000	0.000	0.000	0.000	0.000	80	512	3540	3152	0.616	Error	Error	2142	1398	0	0	1912	1240	0	0	0	0
1	8	18	""	"iYOR234C"	3440	17290	100	2838	2425	1447	83	264	644	77	76	0	2546	2218	1412	267	437	628	76	67	0	0	0	0	0	0	0	0	0	0	0	0	0	0	0	0	0	0	0	1.209	1.200	1.147	0.999	2.064	1.104	0.878	0.000	0.000	0.000	0.000	0.000	0.000	0.000	0.000	0.000	0.000	0.000	0.000	0.000	0.000	80	456	5034	4293	0.274	Error	Error	2755	2279	0	0	2342	1951	0	0	0	0
1	9	18	""	"iYOR238W"	3650	17290	150	2210	2371	2015	81	228	513	66	55	0	792	1495	1360	260	386	519	50	47	0	0	0	0	0	0	0	0	0	0	0	0	0	0	0	0	0	0	0	4.002	1.854	1.812	2.077	2.423	1.555	0.859	0.000	0.000	0.000	0.000	0.000	0.000	0.000	0.000	0.000	0.000	0.000	0.000	0.000	0.000	156	786	2661	3525	2.001	Error	Error	2129	532	0	0	2290	1235	0	0	0	0
1	10	18	""	"iYOR243C"	3820	17280	110	2869	2285	1460	79	303	838	75	63	0	2980	2396	1589	251	525	974	65	61	0	0	0	0	0	0	0	0	0	0	0	0	0	0	0	0	0	0	0	1.022	1.028	1.040	1.078	2.206	0.919	0.880	0.000	0.000	0.000	0.000	0.000	0.000	0.000	0.000	0.000	0.000	0.000	0.000	0.000	0.000	80	474	5519	4351	0.032	Error	Error	2790	2729	0	0	2206	2145	0	0	0	0
1	11	18	""	"iYPL131W"	4010	17290	110	2329	2027	1284	86	320	829	70	63	0	2397	1986	1285	268	553	968	68	53	0	0	0	0	0	0	0	0	0	0	0	0	0	0	0	0	0	0	0	1.054	1.130	1.093	1.253	1.909	0.953	0.868	0.000	0.000	0.000	0.000	0.000	0.000	0.000	0.000	0.000	0.000	0.000	0.000	0.000	0.000	80	484	4372	3659	0.075	Error	Error	2243	2129	0	0	1941	1718	0	0	0	0
1	12	18	""	"iYPL127C"	4200	17290	110	5846	5043	2849	92	332	1198	82	75	0	3055	2494	1650	310	454	692	68	65	0	0	0	0	0	0	0	0	0	0	0	0	0	0	0	0	0	0	0	2.096	2.267	2.146	2.790	2.282	2.089	0.874	0.000	0.000	0.000	0.000	0.000	0.000	0.000	0.000	0.000	0.000	0.000	0.000	0.000	0.000	80	534	8499	7135	1.068	Error	Error	5754	2745	0	0	4951	2184	0	0	0	0
1	13	18	""	"iYPL123C"	4400	17290	100	2090	1825	1031	91	348	1274	70	22	0	2339	2128	1257	289	443	701	75	67	0	0	0	0	0	0	0	0	0	0	0	0	0	0	0	0	0	0	0	0.975	0.943	0.920	0.919	1.685	0.880	0.885	0.000	0.000	0.000	0.000	0.000	0.000	0.000	0.000	0.000	0.000	0.000	0.000	0.000	0.000	80	456	4049	3573	-0.036	Error	Error	1999	2050	0	0	1734	1839	0	0	0	0
1	14	18	""	"iYPL106C"	4580	17290	110	4046	3198	1855	94	238	675	81	73	0	2629	2162	1402	281	401	533	71	66	0	0	0	0	0	0	0	0	0	0	0	0	0	0	0	0	0	0	0	1.683	1.650	1.649	1.881	2.653	1.502	0.897	0.000	0.000	0.000	0.000	0.000	0.000	0.000	0.000	0.000	0.000	0.000	0.000	0.000	0.000	80	501	6300	4985	0.751	Error	Error	3952	2348	0	0	3104	1881	0	0	0	0
1	15	18	""	"iYPL101W"	4770	17280	110	1937	1685	1065	89	262	701	75	58	0	1412	1228	800	275	417	594	62	47	0	0	0	0	0	0	0	0	0	0	0	0	0	0	0	0	0	0	0	1.625	1.675	1.594	1.487	2.385	1.424	0.854	0.000	0.000	0.000	0.000	0.000	0.000	0.000	0.000	0.000	0.000	0.000	0.000	0.000	0.000	80	536	2985	2549	0.701	Error	Error	1848	1137	0	0	1596	953	0	0	0	0
1	16	18	""	"iYPL095C"	4970	17290	110	3828	3221	1775	92	167	264	86	81	0	3941	3345	1881	271	345	277	82	81	0	0	0	0	0	0	0	0	0	0	0	0	0	0	0	0	0	0	0	1.018	1.018	1.032	1.050	1.387	0.968	0.929	0.000	0.000	0.000	0.000	0.000	0.000	0.000	0.000	0.000	0.000	0.000	0.000	0.000	0.000	80	520	7406	6203	0.026	Error	Error	3736	3670	0	0	3129	3074	0	0	0	0
1	17	18	""	"iYPL079W"	5160	17280	110	3363	2806	1665	90	147	197	92	82	0	5332	4273	2645	281	389	586	75	75	0	0	0	0	0	0	0	0	0	0	0	0	0	0	0	0	0	0	0	0.648	0.680	0.675	0.783	1.859	0.623	0.861	0.000	0.000	0.000	0.000	0.000	0.000	0.000	0.000	0.000	0.000	0.000	0.000	0.000	0.000	80	534	8324	6708	-0.626	Error	Error	3273	5051	0	0	2716	3992	0	0	0	0
1	18	18	""	"iYPL076W-1"	5370	17290	120	5087	4691	3428	84	141	255	90	83	0	3192	2887	2055	268	377	588	69	66	0	0	0	0	0	0	0	0	0	0	0	0	0	0	0	0	0	0	0	1.711	1.759	1.772	1.885	2.201	1.814	0.893	0.000	0.000	0.000	0.000	0.000	0.000	0.000	0.000	0.000	0.000	0.000	0.000	0.000	0.000	120	601	7927	7226	0.775	Error	Error	5003	2924	0	0	4607	2619	0	0	0	0
1	19	18	""	"iYPL070W"	5540	17280	110	1406	1199	705	84	116	133	85	78	0	4269	3437	2175	274	366	353	78	73	0	0	0	0	0	0	0	0	0	0	0	0	0	0	0	0	0	0	0	0.331	0.353	0.351	0.391	1.863	0.317	0.906	0.000	0.000	0.000	0.000	0.000	0.000	0.000	0.000	0.000	0.000	0.000	0.000	0.000	0.000	80	468	5317	4278	-1.595	Error	Error	1322	3995	0	0	1115	3163	0	0	0	0
1	20	18	""	"iYPL057C"	5720	17290	110	2417	2180	1185	89	187	396	86	80	0	1529	1391	792	285	415	462	75	66	0	0	0	0	0	0	0	0	0	0	0	0	0	0	0	0	0	0	0	1.871	1.891	1.767	1.779	2.132	1.713	0.696	0.000	0.000	0.000	0.000	0.000	0.000	0.000	0.000	0.000	0.000	0.000	0.000	0.000	0.000	80	516	3572	3197	0.904	Error	Error	2328	1244	0	0	2091	1106	0	0	0	0
1	21	18	""	"iYPL053C"	5910	17290	110	3808	3361	2014	90	272	713	85	77	0	2844	2401	1577	283	426	609	72	68	0	0	0	0	0	0	0	0	0	0	0	0	0	0	0	0	0	0	0	1.452	1.544	1.510	1.767	1.827	1.426	0.891	0.000	0.000	0.000	0.000	0.000	0.000	0.000	0.000	0.000	0.000	0.000	0.000	0.000	0.000	80	522	6279	5389	0.538	Error	Error	3718	2561	0	0	3271	2118	0	0	0	0
1	22	18	""	"iYPL049C"	6100	17290	110	2055	1984	1310	88	239	674	76	67	0	1554	1479	947	263	383	567	71	60	0	0	0	0	0	0	0	0	0	0	0	0	0	0	0	0	0	0	0	1.524	1.559	1.585	1.377	2.150	1.473	0.851	0.000	0.000	0.000	0.000	0.000	0.000	0.000	0.000	0.000	0.000	0.000	0.000	0.000	0.000	80	560	3258	3112	0.608	Error	Error	1967	1291	0	0	1896	1216	0	0	0	0
1	1	19	""	"YORWdelta19"	2120	17470	100	729	946	950	77	99	130	65	61	0	2004	2197	2116	258	325	428	60	56	0	0	0	0	0	0	0	0	0	0	0	0	0	0	0	0	0	0	0	0.373	0.448	0.419	0.445	2.505	0.407	0.864	0.000	0.000	0.000	0.000	0.000	0.000	0.000	0.000	0.000	0.000	0.000	0.000	0.000	0.000	80	473	2398	2808	-1.421	Error	Error	652	1746	0	0	869	1939	0	0	0	0
1	2	19	""	"TEL15R-5"	2320	17480	120	37020	35424	29079	91	350	1387	88	80	39	15729	22841	20870	278	545	1181	81	65	0	0	0	0	0	0	0	0	0	0	0	0	0	0	0	0	0	0	0	2.390	1.566	1.491	1.900	2.360	1.519	0.894	0.000	0.000	0.000	0.000	0.000	0.000	0.000	0.000	0.000	0.000	0.000	0.000	0.000	0.000	120	587	52380	57896	1.257	Error	Error	36929	15451	0	0	35333	22563	0	0	0	0
1	3	19	""	"YPLCtau1"	2510	17480	120	3372	7067	7402	89	415	1585	59	50	0	4445	13628	14283	284	596	1294	58	53	0	0	0	0	0	0	0	0	0	0	0	0	0	0	0	0	0	0	0	0.789	0.523	0.565	0.667	2.717	0.510	0.857	0.000	0.000	0.000	0.000	0.000	0.000	0.000	0.000	0.000	0.000	0.000	0.000	0.000	0.000	120	436	7444	20322	-0.342	Error	Error	3283	4161	0	0	6978	13344	0	0	0	0
1	4	19	""	"Q0055"	2690	17480	140	135	223	188	84	184	599	2	0	0	341	556	509	280	659	2448	0	0	0	0	0	0	0	0	0	0	0	0	0	0	0	0	0	0	0	0	0	0.836	0.504	0.354	0.358	2.479	0.340	0.776	0.000	0.000	0.000	0.000	0.000	0.000	0.000	0.000	0.000	0.000	0.000	0.000	0.000	0.000	156	538	112	415	-0.258	Error	Error	51	61	0	0	139	276	0	0	0	0
1	5	19	""	"Q0075"	2860	17480	80	271	276	181	86	117	93	63	50	0	682	634	418	276	340	236	59	42	0	0	0	0	0	0	0	0	0	0	0	0	0	0	0	0	0	0	0	0.456	0.531	0.400	0.413	2.453	0.325	0.510	0.000	0.000	0.000	0.000	0.000	0.000	0.000	0.000	0.000	0.000	0.000	0.000	0.000	0.000	52	280	591	548	-1.134	Error	Error	185	406	0	0	190	358	0	0	0	0
1	6	19	""	"Q0095"	3050	17480	90	380	373	184	92	144	136	82	50	0	661	674	372	274	365	266	71	32	0	0	0	0	0	0	0	0	0	0	0	0	0	0	0	0	0	0	0	0.744	0.702	0.638	0.656	2.954	0.525	0.606	0.000	0.000	0.000	0.000	0.000	0.000	0.000	0.000	0.000	0.000	0.000	0.000	0.000	0.000	52	379	675	681	-0.426	Error	Error	288	387	0	0	281	400	0	0	0	0
1	7	19	""	"Q0180"	3270	17480	120	12542	10303	8383	86	134	154	94	90	0	3691	3098	2510	259	309	192	67	65	0	0	0	0	0	0	0	0	0	0	0	0	0	0	0	0	0	0	0	3.629	3.599	3.420	4.439	2.109	3.642	0.907	0.000	0.000	0.000	0.000	0.000	0.000	0.000	0.000	0.000	0.000	0.000	0.000	0.000	0.000	120	522	15888	13056	1.860	Error	Error	12456	3432	0	0	10217	2839	0	0	0	0
1	8	19	""	"IntQ0185A"	3450	17480	120	6536	9081	9531	82	179	381	84	70	0	1243	2490	2535	259	306	278	57	54	0	0	0	0	0	0	0	0	0	0	0	0	0	0	0	0	0	0	0	6.559	4.034	3.757	4.523	2.147	3.932	0.884	0.000	0.000	0.000	0.000	0.000	0.000	0.000	0.000	0.000	0.000	0.000	0.000	0.000	0.000	120	471	7438	11230	2.713	Error	Error	6454	984	0	0	8999	2231	0	0	0	0
1	9	19	""	"Q0195"	3620	17480	90	619	624	545	87	220	371	61	23	0	564	632	493	250	321	227	57	40	0	0	0	0	0	0	0	0	0	0	0	0	0	0	0	0	0	0	0	1.694	1.406	1.164	0.865	3.262	1.371	0.630	0.000	0.000	0.000	0.000	0.000	0.000	0.000	0.000	0.000	0.000	0.000	0.000	0.000	0.000	52	328	846	919	0.761	Error	Error	532	314	0	0	537	382	0	0	0	0
1	10	19	""	"Q0257"	3830	17480	100	732	659	322	74	157	296	78	61	0	1112	1025	528	243	344	394	77	58	0	0	0	0	0	0	0	0	0	0	0	0	0	0	0	0	0	0	0	0.757	0.748	0.717	0.667	1.841	0.679	0.839	0.000	0.000	0.000	0.000	0.000	0.000	0.000	0.000	0.000	0.000	0.000	0.000	0.000	0.000	80	459	1527	1367	-0.401	Error	Error	658	869	0	0	585	782	0	0	0	0
1	11	19	""	"IntQ0280A"	4040	17470	140	2457	1963	1435	83	180	409	72	62	0	2087	1683	1143	280	407	514	62	58	0	0	0	0	0	0	0	0	0	0	0	0	0	0	0	0	0	0	0	1.314	1.340	1.350	1.263	2.060	1.282	0.904	0.000	0.000	0.000	0.000	0.000	0.000	0.000	0.000	0.000	0.000	0.000	0.000	0.000	0.000	156	571	4181	3283	0.394	Error	Error	2374	1807	0	0	1880	1403	0	0	0	0
1	12	19	""	"Q0295"	4200	17480	110	5125	4668	2906	92	170	392	86	85	0	2552	2218	1381	296	340	270	76	73	0	0	0	0	0	0	0	0	0	0	0	0	0	0	0	0	0	0	0	2.231	2.381	2.317	2.779	1.978	2.295	0.878	0.000	0.000	0.000	0.000	0.000	0.000	0.000	0.000	0.000	0.000	0.000	0.000	0.000	0.000	80	407	7289	6498	1.158	Error	Error	5033	2256	0	0	4576	1922	0	0	0	0
1	13	19	""	"iYHR216W"	4410	17480	120	12646	12073	10166	94	178	389	94	85	0	15100	13733	12367	289	367	409	80	73	0	0	0	0	0	0	0	0	0	0	0	0	0	0	0	0	0	0	0	0.847	0.891	0.949	1.386	2.920	0.840	0.915	0.000	0.000	0.000	0.000	0.000	0.000	0.000	0.000	0.000	0.000	0.000	0.000	0.000	0.000	120	531	27363	25423	-0.239	Error	Error	12552	14811	0	0	11979	13444	0	0	0	0
1	14	19	""	"TEL9L"	4610	17480	120	30198	24868	18955	93	299	1239	97	87	1	31291	24940	18633	290	604	2042	88	80	0	0	0	0	0	0	0	0	0	0	0	0	0	0	0	0	0	0	0	0.971	1.005	1.003	1.139	2.368	0.997	0.930	0.000	0.000	0.000	0.000	0.000	0.000	0.000	0.000	0.000	0.000	0.000	0.000	0.000	0.000	120	475	61106	49425	-0.042	Error	Error	30105	31001	0	0	24775	24650	0	0	0	0
1	15	19	""	"YILCdelta3"	4780	17480	110	12240	10285	6384	96	834	2686	78	75	0	17896	15414	11373	285	1740	5236	67	62	0	0	0	0	0	0	0	0	0	0	0	0	0	0	0	0	0	0	0	0.690	0.673	0.656	0.773	2.101	0.577	0.910	0.000	0.000	0.000	0.000	0.000	0.000	0.000	0.000	0.000	0.000	0.000	0.000	0.000	0.000	80	444	29755	25318	-0.536	Error	Error	12144	17611	0	0	10189	15129	0	0	0	0
1	16	19	""	"YJRWdelta14"	4970	17480	100	899	833	487	96	702	2443	0	0	0	1232	1177	670	281	1536	4900	0	0	0	0	0	0	0	0	0	0	0	0	0	0	0	0	0	0	0	0	0	0.844	0.823	0.814	0.814	1.639	0.320	0.759	0.000	0.000	0.000	0.000	0.000	0.000	0.000	0.000	0.000	0.000	0.000	0.000	0.000	0.000	80	438	1754	1633	-0.244	Error	Error	803	951	0	0	737	896	0	0	0	0
1	17	19	""	"SNR64"	5170	17480	100	1333	1144	700	92	162	256	73	72	0	1256	1102	691	275	380	515	70	45	0	0	0	0	0	0	0	0	0	0	0	0	0	0	0	0	0	0	0	1.265	1.272	1.113	0.940	2.723	1.099	0.826	0.000	0.000	0.000	0.000	0.000	0.000	0.000	0.000	0.000	0.000	0.000	0.000	0.000	0.000	80	427	2222	1879	0.339	Error	Error	1241	981	0	0	1052	827	0	0	0	0
1	18	19	""	"YKL162C-A"	5330	17480	90	1376	1260	758	97	317	583	73	63	0	1614	1455	858	274	519	694	67	48	0	0	0	0	0	0	0	0	0	0	0	0	0	0	0	0	0	0	0	0.954	0.985	0.906	0.965	2.960	0.893	0.864	0.000	0.000	0.000	0.000	0.000	0.000	0.000	0.000	0.000	0.000	0.000	0.000	0.000	0.000	52	343	2619	2344	-0.067	Error	Error	1279	1340	0	0	1163	1181	0	0	0	0
1	19	19	""	"itQ(UUG)L"	5540	17480	100	1650	1420	905	93	237	489	71	67	0	2707	2365	1468	297	493	662	76	70	0	0	0	0	0	0	0	0	0	0	0	0	0	0	0	0	0	0	0	0.646	0.642	0.594	0.534	2.115	0.595	0.867	0.000	0.000	0.000	0.000	0.000	0.000	0.000	0.000	0.000	0.000	0.000	0.000	0.000	0.000	80	468	3967	3395	-0.630	Error	Error	1557	2410	0	0	1327	2068	0	0	0	0
1	20	19	""	"RDN25-1B"	5740	17480	110	9557	8357	5359	95	290	789	82	80	0	50098	39321	23282	298	1431	5283	81	78	8	0	0	0	0	0	0	0	0	0	0	0	0	0	0	0	0	0	0	0.190	0.212	0.207	0.186	1.623	0.208	0.921	0.000	0.000	0.000	0.000	0.000	0.000	0.000	0.000	0.000	0.000	0.000	0.000	0.000	0.000	80	474	59262	47285	-2.396	Error	Error	9462	49800	0	0	8262	39023	0	0	0	0
1	21	19	""	"RDN37-1"	5930	17480	120	5859	5297	3925	101	308	798	75	67	0	23576	20095	16363	305	1591	5280	63	59	0	0	0	0	0	0	0	0	0	0	0	0	0	0	0	0	0	0	0	0.247	0.263	0.259	0.363	3.317	0.225	0.910	0.000	0.000	0.000	0.000	0.000	0.000	0.000	0.000	0.000	0.000	0.000	0.000	0.000	0.000	120	512	29029	24986	-2.015	Error	Error	5758	23271	0	0	5196	19790	0	0	0	0
1	22	19	""	"iYLR162W-A"	6120	17480	110	8408	7825	5280	92	317	915	80	80	0	37863	33532	21906	295	1590	5216	80	72	2	0	0	0	0	0	0	0	0	0	0	0	0	0	0	0	0	0	0	0.221	0.233	0.227	0.200	1.923	0.222	0.901	0.000	0.000	0.000	0.000	0.000	0.000	0.000	0.000	0.000	0.000	0.000	0.000	0.000	0.000	80	488	45884	40970	-2.176	Error	Error	8316	37568	0	0	7733	33237	0	0	0	0
1	1	20	""	"tI(UAU)L"	2120	17670	100	417	521	476	80	101	112	57	53	0	674	1108	2297	256	294	191	56	53	0	0	0	0	0	0	0	0	0	0	0	0	0	0	0	0	0	0	0	0.806	0.518	0.560	0.427	3.280	0.105	0.133	0.000	0.000	0.000	0.000	0.000	0.000	0.000	0.000	0.000	0.000	0.000	0.000	0.000	0.000	80	524	755	1293	-0.311	Error	Error	337	418	0	0	441	852	0	0	0	0
1	2	20	""	"YLRWdelta17"	2310	17680	110	1429	1801	1677	87	186	455	63	55	0	2453	2590	2494	263	412	697	57	52	0	0	0	0	0	0	0	0	0	0	0	0	0	0	0	0	0	0	0	0.613	0.737	0.680	0.738	3.273	0.664	0.874	0.000	0.000	0.000	0.000	0.000	0.000	0.000	0.000	0.000	0.000	0.000	0.000	0.000	0.000	80	502	3532	4041	-0.707	Error	Error	1342	2190	0	0	1714	2327	0	0	0	0
1	3	20	"EMPTY"	"EMPTY"	2490	17660	150	81	87	37	79	286	1181	0	0	0	277	286	95	257	487	1071	0	0	0	0	0	0	0	0	0	0	0	0	0	0	0	0	0	0	0	0	0	0.100	0.276	0.396	0.413	3.221	0.601	0.838	0.000	0.000	0.000	0.000	0.000	0.000	0.000	0.000	0.000	0.000	0.000	0.000	0.000	0.000	156	719	22	37	-3.322	Error	Error	2	20	0	0	8	29	0	0	-75	0
1	4	20	"EMPTY"	"EMPTY"	2680	17660	150	73	78	36	75	88	106	1	0	0	265	271	86	250	286	255	1	0	0	0	0	0	0	0	0	0	0	0	0	0	0	0	0	0	0	0	0	-0.133	0.143	0.397	0.349	4.074	0.053	0.011	0.000	0.000	0.000	0.000	0.000	0.000	0.000	0.000	0.000	0.000	0.000	0.000	0.000	0.000	156	666	13	24	Error	Error	Error	-2	15	0	0	3	21	0	0	-75	0
1	5	20	"EMPTY"	"EMPTY"	2870	17660	150	72	74	31	73	85	60	1	0	0	242	248	76	250	278	143	3	1	0	0	0	0	0	0	0	0	0	0	0	0	0	0	0	0	0	0	0	0.125	-0.500	0.457	0.482	4.734	0.169	0.076	0.000	0.000	0.000	0.000	0.000	0.000	0.000	0.000	0.000	0.000	0.000	0.000	0.000	0.000	156	745	-9	-1	-3.000	Error	Error	-1	-8	0	0	1	-2	0	0	-75	0
1	6	20	"EMPTY"	"EMPTY"	3060	17660	150	71	76	30	77	100	94	0	0	0	242	253	83	250	288	171	5	0	0	0	0	0	0	0	0	0	0	0	0	0	0	0	0	0	0	0	0	0.750	-0.333	0.345	0.419	4.191	0.171	0.117	0.000	0.000	0.000	0.000	0.000	0.000	0.000	0.000	0.000	0.000	0.000	0.000	0.000	0.000	156	798	-14	2	-0.415	Error	Error	-6	-8	0	0	-1	3	0	0	-75	0
1	7	20	"EMPTY"	"EMPTY"	3250	17660	150	73	76	34	74	97	100	1	0	0	256	264	82	251	277	141	7	0	0	0	0	0	0	0	0	0	0	0	0	0	0	0	0	0	0	0	0	-0.200	0.154	0.390	0.499	5.759	2493.974	0.000	0.000	0.000	0.000	0.000	0.000	0.000	0.000	0.000	0.000	0.000	0.000	0.000	0.000	0.000	156	735	4	15	Error	Error	Error	-1	5	0	0	2	13	0	0	-75	0
1	8	20	"EMPTY"	"EMPTY"	3440	17660	150	68	75	29	72	112	220	0	0	0	235	247	82	248	268	112	7	0	0	0	0	0	0	0	0	0	0	0	0	0	0	0	0	0	0	0	0	0.308	-3.000	0.353	0.443	4.423	0.007	0.000	0.000	0.000	0.000	0.000	0.000	0.000	0.000	0.000	0.000	0.000	0.000	0.000	0.000	0.000	156	695	-17	2	-1.700	Error	Error	-4	-13	0	0	3	-1	0	0	-75	0
1	9	20	"EMPTY"	"EMPTY"	3630	17660	150	67	75	31	75	128	242	0	0	0	236	252	75	240	282	199	1	0	0	0	0	0	0	0	0	0	0	0	0	0	0	0	0	0	0	0	0	2.000	0.000	0.460	0.475	3.450	0.350	0.277	0.000	0.000	0.000	0.000	0.000	0.000	0.000	0.000	0.000	0.000	0.000	0.000	0.000	0.000	156	765	-12	12	1.000	Error	Error	-8	-4	0	0	0	12	0	0	-75	0
1	10	20	"EMPTY"	"EMPTY"	3820	17660	150	71	74	27	73	109	166	0	0	0	257	260	82	240	295	235	1	0	0	0	0	0	0	0	0	0	0	0	0	0	0	0	0	0	0	0	0	-0.118	0.050	0.321	0.300	3.844	0.296	0.240	0.000	0.000	0.000	0.000	0.000	0.000	0.000	0.000	0.000	0.000	0.000	0.000	0.000	0.000	156	778	15	21	Error	Error	Error	-2	17	0	0	1	20	0	0	-75	0
1	11	20	"EMPTY"	"EMPTY"	4010	17660	150	76	78	32	73	99	135	0	0	0	265	266	67	249	290	206	1	0	0	0	0	0	0	0	0	0	0	0	0	0	0	0	0	0	0	0	0	0.188	0.294	0.470	0.413	3.764	0.153	0.128	0.000	0.000	0.000	0.000	0.000	0.000	0.000	0.000	0.000	0.000	0.000	0.000	0.000	0.000	156	710	19	22	-2.415	Error	Error	3	16	0	0	5	17	0	0	-75	0
1	12	20	"EMPTY"	"EMPTY"	4200	17660	150	80	81	31	80	118	292	0	0	0	265	270	81	258	292	230	1	0	0	0	0	0	0	0	0	0	0	0	0	0	0	0	0	0	0	0	0	0.000	0.083	0.368	0.413	3.479	0.702	0.226	0.000	0.000	0.000	0.000	0.000	0.000	0.000	0.000	0.000	0.000	0.000	0.000	0.000	0.000	156	710	7	13	Error	Error	Error	0	7	0	0	1	12	0	0	-75	0
1	13	20	"EMPTY"	"EMPTY"	4390	17660	150	88	89	37	84	135	325	0	0	0	276	279	85	267	321	349	0	0	0	0	0	0	0	0	0	0	0	0	0	0	0	0	0	0	0	0	0	0.444	0.417	0.526	0.511	4.074	0.093	0.036	0.000	0.000	0.000	0.000	0.000	0.000	0.000	0.000	0.000	0.000	0.000	0.000	0.000	0.000	156	736	13	17	-1.170	Error	Error	4	9	0	0	5	12	0	0	-75	0
1	14	20	"EMPTY"	"EMPTY"	4580	17660	150	75	80	37	82	178	958	0	0	0	265	271	85	263	424	1636	0	0	0	0	0	0	0	0	0	0	0	0	0	0	0	0	0	0	0	0	0	-3.500	-0.250	0.468	0.485	4.132	0.100	0.037	0.000	0.000	0.000	0.000	0.000	0.000	0.000	0.000	0.000	0.000	0.000	0.000	0.000	0.000	156	703	-5	6	Error	Error	Error	-7	2	0	0	-2	8	0	0	-75	0
1	15	20	"EMPTY"	"EMPTY"	4770	17660	150	73	79	32	81	440	1937	0	0	0	262	271	73	259	941	3670	0	0	0	0	0	0	0	0	0	0	0	0	0	0	0	0	0	0	0	0	0	-2.667	-0.167	0.449	0.421	3.667	0.547	0.880	0.000	0.000	0.000	0.000	0.000	0.000	0.000	0.000	0.000	0.000	0.000	0.000	0.000	0.000	156	720	-5	10	Error	Error	Error	-8	3	0	0	-2	12	0	0	-75	0
1	16	20	"EMPTY"	"EMPTY"	4960	17660	150	80	85	41	84	343	1612	0	0	0	263	276	97	261	764	3122	0	0	0	0	0	0	0	0	0	0	0	0	0	0	0	0	0	0	0	0	0	-2.000	0.067	0.507	0.474	3.512	0.253	0.212	0.000	0.000	0.000	0.000	0.000	0.000	0.000	0.000	0.000	0.000	0.000	0.000	0.000	0.000	156	761	-2	16	Error	Error	Error	-4	2	0	0	1	15	0	0	-75	0
1	17	20	"EMPTY"	"EMPTY"	5150	17660	150	85	91	45	82	113	164	1	0	0	260	280	100	255	305	248	2	0	0	0	0	0	0	0	0	0	0	0	0	0	0	0	0	0	0	0	0	0.600	0.360	0.429	0.471	3.361	0.140	0.056	0.000	0.000	0.000	0.000	0.000	0.000	0.000	0.000	0.000	0.000	0.000	0.000	0.000	0.000	156	753	8	34	-0.737	Error	Error	3	5	0	0	9	25	0	0	-75	0
1	18	20	"EMPTY"	"EMPTY"	5340	17660	150	86	93	48	82	163	367	0	0	0	258	269	83	259	350	429	0	0	0	0	0	0	0	0	0	0	0	0	0	0	0	0	0	0	0	0	0	-4.000	1.100	0.372	0.366	4.408	0.440	0.301	0.000	0.000	0.000	0.000	0.000	0.000	0.000	0.000	0.000	0.000	0.000	0.000	0.000	0.000	156	772	3	21	Error	Error	Error	4	-1	0	0	11	10	0	0	-75	0
1	19	20	"EMPTY"	"EMPTY"	5530	17660	150	71	76	32	84	148	298	0	0	0	262	264	76	262	355	417	0	0	0	0	0	0	0	0	0	0	0	0	0	0	0	0	0	0	0	0	0	100000.000	-4.000	0.385	0.438	3.546	0.159	0.206	0.000	0.000	0.000	0.000	0.000	0.000	0.000	0.000	0.000	0.000	0.000	0.000	0.000	0.000	156	783	-13	-6	16.610	Error	Error	-13	0	0	0	-8	2	0	0	-75	0
1	20	20	"EMPTY"	"EMPTY"	5720	17660	150	79	81	32	86	184	595	0	0	0	263	274	93	273	858	4074	0	0	0	0	0	0	0	0	0	0	0	0	0	0	0	0	0	0	0	0	0	0.700	-5.000	0.416	0.422	5.343	0.263	0.865	0.000	0.000	0.000	0.000	0.000	0.000	0.000	0.000	0.000	0.000	0.000	0.000	0.000	0.000	156	753	-17	-4	-0.515	Error	Error	-7	-10	0	0	-5	1	0	0	-75	0
1	21	20	"EMPTY"	"EMPTY"	5910	17660	150	84	88	38	89	210	620	0	0	0	251	264	113	279	1068	4365	0	0	0	0	0	0	0	0	0	0	0	0	0	0	0	0	0	0	0	0	0	0.179	0.067	0.328	0.320	4.270	0.259	0.348	0.000	0.000	0.000	0.000	0.000	0.000	0.000	0.000	0.000	0.000	0.000	0.000	0.000	0.000	156	723	-33	-16	-2.485	Error	Error	-5	-28	0	0	-1	-15	0	0	-75	0
1	22	20	"EMPTY"	"EMPTY"	6100	17660	150	88	92	39	84	189	651	0	0	0	271	283	100	266	867	3720	0	0	0	0	0	0	0	0	0	0	0	0	0	0	0	0	0	0	0	0	0	0.800	0.471	0.552	0.488	4.829	0.344	0.742	0.000	0.000	0.000	0.000	0.000	0.000	0.000	0.000	0.000	0.000	0.000	0.000	0.000	0.000	156	918	9	25	-0.322	Error	Error	4	5	0	0	8	17	0	0	-75	0
2	1	1	"VPS8"	"YAL002W"	6520	13990	150	486	509	257	75	79	32	94	92	0	987	1020	483	254	264	81	89	87	0	0	0	0	0	0	0	0	0	0	0	0	0	0	0	0	0	0	0	0.561	0.567	0.580	0.567	2.148	0.493	0.741	0.000	0.000	0.000	0.000	0.000	0.000	0.000	0.000	0.000	0.000	0.000	0.000	0.000	0.000	156	688	1144	1200	-0.835	Error	Error	411	733	0	0	434	766	0	0	0	0
2	2	1	"MTW1"	"YAL034W-A"	6680	14000	150	7217	6464	3176	73	79	37	98	96	0	32865	29000	16052	255	266	83	92	89	0	0	0	0	0	0	0	0	0	0	0	0	0	0	0	0	0	0	0	0.219	0.222	0.226	0.300	2.718	0.204	0.923	0.000	0.000	0.000	0.000	0.000	0.000	0.000	0.000	0.000	0.000	0.000	0.000	0.000	0.000	156	694	39754	35136	-2.191	Error	Error	7144	32610	0	0	6391	28745	0	0	0	0
2	3	1	""	"YAL064W-B"	6900	13990	150	12424	10362	4708	78	85	39	98	97	0	18639	15533	8377	271	286	104	91	89	0	0	0	0	0	0	0	0	0	0	0	0	0	0	0	0	0	0	0	0.672	0.674	0.648	0.796	2.175	0.607	0.916	0.000	0.000	0.000	0.000	0.000	0.000	0.000	0.000	0.000	0.000	0.000	0.000	0.000	0.000	156	761	30714	25546	-0.573	Error	Error	12346	18368	0	0	10284	15262	0	0	0	0
2	4	1	""	"YAL004W"	7090	13990	150	12847	11452	4639	83	89	50	98	96	0	9590	9044	3611	275	290	155	94	94	0	0	0	0	0	0	0	0	0	0	0	0	0	0	0	0	0	0	0	1.370	1.296	1.318	1.273	1.772	1.301	0.924	0.000	0.000	0.000	0.000	0.000	0.000	0.000	0.000	0.000	0.000	0.000	0.000	0.000	0.000	156	720	22079	20138	0.454	Error	Error	12764	9315	0	0	11369	8769	0	0	0	0
2	5	1	"FUN12"	"YAL035W"	7280	13990	150	3348	3250	1861	80	95	176	87	84	0	7374	6821	4067	270	294	312	84	82	0	0	0	0	0	0	0	0	0	0	0	0	0	0	0	0	0	0	0	0.460	0.484	0.481	0.504	2.371	0.461	0.914	0.000	0.000	0.000	0.000	0.000	0.000	0.000	0.000	0.000	0.000	0.000	0.000	0.000	0.000	156	728	10372	9721	-1.120	Error	Error	3268	7104	0	0	3170	6551	0	0	0	0
2	6	1	""	"YAL066W"	7470	13990	150	162	170	76	78	82	33	80	62	0	525	536	213	266	273	100	78	66	0	0	0	0	0	0	0	0	0	0	0	0	0	0	0	0	0	0	0	0.324	0.341	0.334	0.308	2.266	0.249	0.428	0.000	0.000	0.000	0.000	0.000	0.000	0.000	0.000	0.000	0.000	0.000	0.000	0.000	0.000	156	737	343	362	-1.624	Error	Error	84	259	0	0	92	270	0	0	0	0
2	7	1	"ERP2"	"YAL007C"	7660	13990	150	230	240	117	77	95	175	39	7	0	613	630	296	254	278	262	67	25	0	0	0	0	0	0	0	0	0	0	0	0	0	0	0	0	0	0	0	0.426	0.434	0.458	0.440	1.916	0.324	0.548	0.000	0.000	0.000	0.000	0.000	0.000	0.000	0.000	0.000	0.000	0.000	0.000	0.000	0.000	156	747	512	539	-1.230	Error	Error	153	359	0	0	163	376	0	0	0	0
2	8	1	""	"YAL037W"	7850	13990	150	4399	3736	2232	79	83	33	89	86	0	6545	5916	3779	251	262	88	83	78	0	0	0	0	0	0	0	0	0	0	0	0	0	0	0	0	0	0	0	0.686	0.646	0.653	0.780	2.878	0.596	0.921	0.000	0.000	0.000	0.000	0.000	0.000	0.000	0.000	0.000	0.000	0.000	0.000	0.000	0.000	156	714	10614	9322	-0.543	Error	Error	4320	6294	0	0	3657	5665	0	0	0	0
2	9	1	""	"YAL068C"	8040	13990	150	16087	14437	7409	85	96	99	96	93	0	19695	17442	10028	263	276	98	89	87	0	0	0	0	0	0	0	0	0	0	0	0	0	0	0	0	0	0	0	0.823	0.835	0.848	1.031	2.195	0.787	0.916	0.000	0.000	0.000	0.000	0.000	0.000	0.000	0.000	0.000	0.000	0.000	0.000	0.000	0.000	156	802	35434	31531	-0.280	Error	Error	16002	19432	0	0	14352	17179	0	0	0	0
2	10	1	"spo7"	"YAL009W"	8250	13990	120	7957	7472	2309	88	95	45	100	99	0	14610	14258	3674	266	280	96	99	99	0	0	0	0	0	0	0	0	0	0	0	0	0	0	0	0	0	0	0	0.549	0.528	0.553	0.499	1.487	0.533	0.922	0.000	0.000	0.000	0.000	0.000	0.000	0.000	0.000	0.000	0.000	0.000	0.000	0.000	0.000	120	595	22213	21376	-0.866	Error	Error	7869	14344	0	0	7384	13992	0	0	0	0
2	11	1	"cyc3"	"YAL039C"	8450	13980	120	3694	3778	1347	83	90	41	100	100	0	2368	2533	972	266	275	91	100	100	0	0	0	0	0	0	0	0	0	0	0	0	0	0	0	0	0	0	0	1.718	1.630	1.683	1.634	1.483	1.651	0.846	0.000	0.000	0.000	0.000	0.000	0.000	0.000	0.000	0.000	0.000	0.000	0.000	0.000	0.000	120	558	5713	5962	0.781	Error	Error	3611	2102	0	0	3695	2267	0	0	0	0
2	12	1	"ERP1"	"YAR002C-A"	8640	14010	140	285	294	116	85	95	57	91	78	0	648	649	294	266	276	96	87	80	0	0	0	0	0	0	0	0	0	0	0	0	0	0	0	0	0	0	0	0.524	0.546	0.525	0.518	2.000	0.394	0.476	0.000	0.000	0.000	0.000	0.000	0.000	0.000	0.000	0.000	0.000	0.000	0.000	0.000	0.000	156	669	582	592	-0.934	Error	Error	200	382	0	0	209	383	0	0	0	0
2	13	1	"SLI15"	"YBR156C"	8820	14010	150	3352	3628	1804	82	89	51	100	99	0	5074	5289	2787	260	269	95	97	96	0	0	0	0	0	0	0	0	0	0	0	0	0	0	0	0	0	0	0	0.679	0.705	0.740	0.736	1.559	0.675	0.894	0.000	0.000	0.000	0.000	0.000	0.000	0.000	0.000	0.000	0.000	0.000	0.000	0.000	0.000	156	668	8084	8575	-0.558	Error	Error	3270	4814	0	0	3546	5029	0	0	0	0
2	14	1	""	"YBR187W"	9010	14010	150	5227	5024	1997	82	87	43	100	100	0	2982	2833	1233	254	260	79	94	92	0	0	0	0	0	0	0	0	0	0	0	0	0	0	0	0	0	0	0	1.886	1.916	1.924	1.977	1.520	1.883	0.872	0.000	0.000	0.000	0.000	0.000	0.000	0.000	0.000	0.000	0.000	0.000	0.000	0.000	0.000	156	734	7873	7521	0.915	Error	Error	5145	2728	0	0	4942	2579	0	0	0	0
2	15	1	""	"YBR219C"	9210	14010	140	4675	4469	1694	81	100	223	100	99	0	3224	3072	1190	252	261	78	97	96	0	0	0	0	0	0	0	0	0	0	0	0	0	0	0	0	0	0	0	1.546	1.556	1.586	1.625	1.479	1.551	0.857	0.000	0.000	0.000	0.000	0.000	0.000	0.000	0.000	0.000	0.000	0.000	0.000	0.000	0.000	156	659	7566	7208	0.628	Error	Error	4594	2972	0	0	4388	2820	0	0	0	0
2	16	1	""	"YBR158W"	9380	14010	150	4611	4658	2015	83	89	43	100	100	0	3491	3302	1422	256	266	77	96	95	0	0	0	0	0	0	0	0	0	0	0	0	0	0	0	0	0	0	0	1.400	1.502	1.520	1.594	1.566	1.500	0.869	0.000	0.000	0.000	0.000	0.000	0.000	0.000	0.000	0.000	0.000	0.000	0.000	0.000	0.000	156	660	7763	7621	0.485	Error	Error	4528	3235	0	0	4575	3046	0	0	0	0
2	17	1	"RPS9B"	"YBR189W"	9570	14010	150	6729	6052	2312	87	104	83	100	99	0	5021	4760	1832	266	299	187	96	95	0	0	0	0	0	0	0	0	0	0	0	0	0	0	0	0	0	0	0	1.397	1.327	1.347	1.394	1.641	1.360	0.882	0.000	0.000	0.000	0.000	0.000	0.000	0.000	0.000	0.000	0.000	0.000	0.000	0.000	0.000	156	816	11397	10459	0.482	Error	Error	6642	4755	0	0	5965	4494	0	0	0	0
2	18	1	"pdb1"	"YBR221C"	9780	14010	140	4510	4261	1755	86	96	53	99	99	0	2775	2585	1082	267	286	125	95	93	0	0	0	0	0	0	0	0	0	0	0	0	0	0	0	0	0	0	0	1.764	1.801	1.785	1.843	1.669	1.783	0.874	0.000	0.000	0.000	0.000	0.000	0.000	0.000	0.000	0.000	0.000	0.000	0.000	0.000	0.000	156	724	6932	6493	0.819	Error	Error	4424	2508	0	0	4175	2318	0	0	0	0
2	19	1	"cdc28"	"YBR160W"	9980	14010	140	7243	6571	2683	85	95	66	100	98	0	5118	4887	2167	275	299	332	94	91	0	0	0	0	0	0	0	0	0	0	0	0	0	0	0	0	0	0	0	1.478	1.406	1.428	1.477	1.455	1.398	0.879	0.000	0.000	0.000	0.000	0.000	0.000	0.000	0.000	0.000	0.000	0.000	0.000	0.000	0.000	156	658	12001	11098	0.564	Error	Error	7158	4843	0	0	6486	4612	0	0	0	0
2	20	1	"RPL21A"	"YBR191W"	10170	14010	140	6352	5716	2060	85	90	41	100	100	0	6352	5786	2109	275	282	100	97	97	0	0	0	0	0	0	0	0	0	0	0	0	0	0	0	0	0	0	0	1.031	1.022	1.023	1.045	1.500	1.017	0.897	0.000	0.000	0.000	0.000	0.000	0.000	0.000	0.000	0.000	0.000	0.000	0.000	0.000	0.000	156	613	12344	11142	0.044	Error	Error	6267	6077	0	0	5631	5511	0	0	0	0
2	21	1	""	"YBR223C"	10340	14020	150	4905	4396	1959	91	108	149	99	96	0	3187	2964	1367	275	293	139	94	91	0	0	0	0	0	0	0	0	0	0	0	0	0	0	0	0	0	0	0	1.653	1.601	1.647	1.725	1.620	1.620	0.864	0.000	0.000	0.000	0.000	0.000	0.000	0.000	0.000	0.000	0.000	0.000	0.000	0.000	0.000	156	685	7726	6994	0.725	Error	Error	4814	2912	0	0	4305	2689	0	0	0	0
2	22	1	""	"YBR162C"	10540	14020	140	5670	5621	2417	90	112	189	100	99	0	7682	7515	3309	275	298	147	98	97	0	0	0	0	0	0	0	0	0	0	0	0	0	0	0	0	0	0	0	0.753	0.764	0.768	0.803	1.543	0.746	0.910	0.000	0.000	0.000	0.000	0.000	0.000	0.000	0.000	0.000	0.000	0.000	0.000	0.000	0.000	156	800	12987	12771	-0.409	Error	Error	5580	7407	0	0	5531	7240	0	0	0	0
2	1	2	"MED8"	"YBR193C"	6550	14200	150	4099	3996	1831	82	94	158	97	96	0	12225	11871	5599	259	287	337	96	94	0	0	0	0	0	0	0	0	0	0	0	0	0	0	0	0	0	0	0	0.336	0.337	0.348	0.353	1.697	0.322	0.915	0.000	0.000	0.000	0.000	0.000	0.000	0.000	0.000	0.000	0.000	0.000	0.000	0.000	0.000	156	628	15983	15526	-1.575	Error	Error	4017	11966	0	0	3914	11612	0	0	0	0
2	2	2	""	"YBR225W"	6740	14200	150	9149	8804	3497	83	106	236	99	98	0	14649	14308	6200	268	315	414	97	97	0	0	0	0	0	0	0	0	0	0	0	0	0	0	0	0	0	0	0	0.630	0.621	0.619	0.672	1.702	0.594	0.908	0.000	0.000	0.000	0.000	0.000	0.000	0.000	0.000	0.000	0.000	0.000	0.000	0.000	0.000	156	555	23447	22761	-0.666	Error	Error	9066	14381	0	0	8721	14040	0	0	0	0
2	3	2	""	"YDL062W"	6940	14200	140	3196	3040	953	89	96	44	100	98	0	2599	2489	821	278	300	123	96	94	0	0	0	0	0	0	0	0	0	0	0	0	0	0	0	0	0	0	0	1.339	1.335	1.365	1.412	1.499	1.314	0.896	0.000	0.000	0.000	0.000	0.000	0.000	0.000	0.000	0.000	0.000	0.000	0.000	0.000	0.000	156	570	5428	5162	0.421	Error	Error	3107	2321	0	0	2951	2211	0	0	0	0
2	4	2	""	"YDL094C"	7130	14200	130	5457	5162	1940	95	184	621	95	93	0	4586	4366	1620	285	415	776	95	88	0	0	0	0	0	0	0	0	0	0	0	0	0	0	0	0	0	0	0	1.247	1.242	1.237	1.276	1.532	1.227	0.903	0.000	0.000	0.000	0.000	0.000	0.000	0.000	0.000	0.000	0.000	0.000	0.000	0.000	0.000	120	486	9663	9148	0.318	Error	Error	5362	4301	0	0	5067	4081	0	0	0	0
2	5	2	"CDC48"	"YDL126C"	7310	14210	140	5312	5376	2423	93	174	579	100	97	0	6598	6756	3164	278	390	726	99	97	0	0	0	0	0	0	0	0	0	0	0	0	0	0	0	0	0	0	0	0.826	0.816	0.814	0.834	1.390	0.795	0.878	0.000	0.000	0.000	0.000	0.000	0.000	0.000	0.000	0.000	0.000	0.000	0.000	0.000	0.000	156	560	11539	11761	-0.276	Error	Error	5219	6320	0	0	5283	6478	0	0	0	0
2	6	2	"UBC9"	"YDL064W"	7500	14200	130	4310	4059	1252	89	166	446	97	95	0	5823	5456	1782	272	404	754	95	95	0	0	0	0	0	0	0	0	0	0	0	0	0	0	0	0	0	0	0	0.760	0.766	0.763	0.778	1.311	0.730	0.937	0.000	0.000	0.000	0.000	0.000	0.000	0.000	0.000	0.000	0.000	0.000	0.000	0.000	0.000	120	594	9772	9154	-0.395	Error	Error	4221	5551	0	0	3970	5184	0	0	0	0
2	7	2	""	"YDL096C"	7720	14210	140	3504	3172	1325	86	161	445	96	91	0	2267	2179	837	267	398	752	89	75	0	0	0	0	0	0	0	0	0	0	0	0	0	0	0	0	0	0	0	1.709	1.614	1.681	1.686	1.675	1.506	0.779	0.000	0.000	0.000	0.000	0.000	0.000	0.000	0.000	0.000	0.000	0.000	0.000	0.000	0.000	156	598	5418	4998	0.773	Error	Error	3418	2000	0	0	3086	1912	0	0	0	0
2	8	2	"VCX1"	"YDL128W"	7880	14210	140	4114	4868	3197	86	99	114	100	100	0	4014	4490	2672	266	279	100	96	94	0	0	0	0	0	0	0	0	0	0	0	0	0	0	0	0	0	0	0	1.075	1.132	1.113	1.188	1.577	1.152	0.887	0.000	0.000	0.000	0.000	0.000	0.000	0.000	0.000	0.000	0.000	0.000	0.000	0.000	0.000	156	577	7776	9006	0.104	Error	Error	4028	3748	0	0	4782	4224	0	0	0	0
2	9	2	"IDP1"	"YDL066W"	8100	14210	140	6257	5712	1909	89	101	114	100	97	0	7979	7479	2505	266	282	107	98	98	0	0	0	0	0	0	0	0	0	0	0	0	0	0	0	0	0	0	0	0.800	0.780	0.786	0.786	1.365	0.768	0.948	0.000	0.000	0.000	0.000	0.000	0.000	0.000	0.000	0.000	0.000	0.000	0.000	0.000	0.000	156	604	13881	12836	-0.322	Error	Error	6168	7713	0	0	5623	7213	0	0	0	0
2	10	2	"SNU23"	"YDL098C"	8260	14210	140	5081	4753	1783	88	94	44	99	99	0	4724	4465	1812	263	279	101	96	96	0	0	0	0	0	0	0	0	0	0	0	0	0	0	0	0	0	0	0	1.119	1.110	1.093	1.195	1.636	1.069	0.915	0.000	0.000	0.000	0.000	0.000	0.000	0.000	0.000	0.000	0.000	0.000	0.000	0.000	0.000	156	538	9454	8867	0.163	Error	Error	4993	4461	0	0	4665	4202	0	0	0	0
2	11	2	"RPP1B"	"YDL130W"	8450	14210	140	3285	3300	1337	92	139	607	95	91	0	3248	3037	1242	269	354	1197	86	71	0	0	0	0	0	0	0	0	0	0	0	0	0	0	0	0	0	0	0	1.072	1.159	1.149	1.206	1.543	1.148	0.873	0.000	0.000	0.000	0.000	0.000	0.000	0.000	0.000	0.000	0.000	0.000	0.000	0.000	0.000	156	614	6172	5976	0.100	Error	Error	3193	2979	0	0	3208	2768	0	0	0	0
2	12	2	""	"YDL068W"	8660	14210	140	3968	3677	1252	99	112	58	100	99	0	6251	5745	2009	274	297	114	97	96	0	0	0	0	0	0	0	0	0	0	0	0	0	0	0	0	0	0	0	0.647	0.654	0.647	0.693	1.569	0.622	0.923	0.000	0.000	0.000	0.000	0.000	0.000	0.000	0.000	0.000	0.000	0.000	0.000	0.000	0.000	156	502	9846	9049	-0.627	Error	Error	3869	5977	0	0	3578	5471	0	0	0	0
2	13	2	""	"YDL100C"	8840	14210	140	8129	7497	2923	92	99	45	100	99	0	5632	5028	2171	269	283	96	96	95	0	0	0	0	0	0	0	0	0	0	0	0	0	0	0	0	0	0	0	1.499	1.556	1.506	1.659	1.668	1.561	0.885	0.000	0.000	0.000	0.000	0.000	0.000	0.000	0.000	0.000	0.000	0.000	0.000	0.000	0.000	156	438	13400	12164	0.584	Error	Error	8037	5363	0	0	7405	4759	0	0	0	0
2	14	2	"LYS21"	"YDL131W"	9020	14210	140	7763	7630	2869	92	133	255	100	98	0	5156	4935	1958	268	301	185	98	97	0	0	0	0	0	0	0	0	0	0	0	0	0	0	0	0	0	0	0	1.569	1.615	1.618	1.676	1.439	1.598	0.910	0.000	0.000	0.000	0.000	0.000	0.000	0.000	0.000	0.000	0.000	0.000	0.000	0.000	0.000	156	609	12559	12205	0.650	Error	Error	7671	4888	0	0	7538	4667	0	0	0	0
2	15	2	"CCT6"	"YDR188W"	9250	14210	140	6343	5678	2351	88	107	243	98	95	0	3920	3675	1614	265	277	93	96	95	0	0	0	0	0	0	0	0	0	0	0	0	0	0	0	0	0	0	0	1.711	1.639	1.638	1.738	1.664	1.646	0.879	0.000	0.000	0.000	0.000	0.000	0.000	0.000	0.000	0.000	0.000	0.000	0.000	0.000	0.000	156	551	9910	9000	0.775	Error	Error	6255	3655	0	0	5590	3410	0	0	0	0
2	16	2	"adr1"	"YDR216W"	9420	14210	140	2620	3116	2613	93	120	112	100	98	0	4674	5225	3359	280	320	227	96	93	0	0	0	0	0	0	0	0	0	0	0	0	0	0	0	0	0	0	0	0.575	0.611	0.580	0.642	1.732	0.629	0.764	0.000	0.000	0.000	0.000	0.000	0.000	0.000	0.000	0.000	0.000	0.000	0.000	0.000	0.000	156	575	6921	7968	-0.798	Error	Error	2527	4394	0	0	3023	4945	0	0	0	0
2	17	2	""	"YDR248C"	9640	14220	110	1610	1566	1007	97	126	118	91	87	0	3742	3617	2453	283	340	267	86	85	0	0	0	0	0	0	0	0	0	0	0	0	0	0	0	0	0	0	0	0.437	0.441	0.441	0.485	1.762	0.407	0.882	0.000	0.000	0.000	0.000	0.000	0.000	0.000	0.000	0.000	0.000	0.000	0.000	0.000	0.000	80	464	4972	4803	-1.193	Error	Error	1513	3459	0	0	1469	3334	0	0	0	0
2	18	2	""	"YDR190C"	9810	14210	140	5909	5489	2594	89	104	80	100	100	0	9137	8650	3893	274	309	373	97	93	0	0	0	0	0	0	0	0	0	0	0	0	0	0	0	0	0	0	0	0.657	0.645	0.652	0.667	1.482	0.637	0.897	0.000	0.000	0.000	0.000	0.000	0.000	0.000	0.000	0.000	0.000	0.000	0.000	0.000	0.000	156	553	14683	13776	-0.607	Error	Error	5820	8863	0	0	5400	8376	0	0	0	0
2	19	2	"SPR28"	"YDR218C"	10010	14210	140	5973	5852	2758	86	99	72	100	100	0	3717	3600	1580	277	302	386	94	91	0	0	0	0	0	0	0	0	0	0	0	0	0	0	0	0	0	0	0	1.711	1.735	1.751	1.813	1.538	1.776	0.865	0.000	0.000	0.000	0.000	0.000	0.000	0.000	0.000	0.000	0.000	0.000	0.000	0.000	0.000	156	474	9327	9089	0.775	Error	Error	5887	3440	0	0	5766	3323	0	0	0	0
2	20	2	""	"YDR250C"	10170	14210	140	2661	2637	1150	92	103	83	99	98	0	1972	1945	785	283	306	275	92	89	0	0	0	0	0	0	0	0	0	0	0	0	0	0	0	0	0	0	0	1.521	1.531	1.525	1.606	1.695	1.518	0.891	0.000	0.000	0.000	0.000	0.000	0.000	0.000	0.000	0.000	0.000	0.000	0.000	0.000	0.000	156	475	4258	4207	0.605	Error	Error	2569	1689	0	0	2545	1662	0	0	0	0
2	21	2	"NUP42"	"YDR192C"	10380	14210	140	5900	5443	3141	98	148	296	94	91	0	7613	6524	3828	285	340	303	92	87	0	0	0	0	0	0	0	0	0	0	0	0	0	0	0	0	0	0	0	0.792	0.857	0.844	0.934	1.737	0.830	0.890	0.000	0.000	0.000	0.000	0.000	0.000	0.000	0.000	0.000	0.000	0.000	0.000	0.000	0.000	156	500	13130	11584	-0.337	Error	Error	5802	7328	0	0	5345	6239	0	0	0	0
2	22	2	""	"YDR220C"	10570	14210	140	2744	2682	1206	93	130	248	95	91	0	1625	1614	778	282	340	380	86	78	0	0	0	0	0	0	0	0	0	0	0	0	0	0	0	0	0	0	0	1.974	1.944	2.016	2.145	1.713	1.616	0.734	0.000	0.000	0.000	0.000	0.000	0.000	0.000	0.000	0.000	0.000	0.000	0.000	0.000	0.000	156	687	3994	3921	0.981	Error	Error	2651	1343	0	0	2589	1332	0	0	0	0
2	1	3	"BTT1"	"YDR252W"	6570	14390	130	2959	2698	1080	93	146	362	94	89	0	4633	4298	1626	277	370	595	94	90	0	0	0	0	0	0	0	0	0	0	0	0	0	0	0	0	0	0	0	0.658	0.648	0.638	0.647	1.388	0.633	0.900	0.000	0.000	0.000	0.000	0.000	0.000	0.000	0.000	0.000	0.000	0.000	0.000	0.000	0.000	120	552	7222	6626	-0.604	Error	Error	2866	4356	0	0	2605	4021	0	0	0	0
2	2	3	"MSS116"	"YDR194C"	6750	14400	140	8647	8262	3095	95	155	367	100	99	0	6175	5774	2126	283	389	602	98	95	0	0	0	0	0	0	0	0	0	0	0	0	0	0	0	0	0	0	0	1.451	1.487	1.477	1.518	1.364	1.504	0.911	0.000	0.000	0.000	0.000	0.000	0.000	0.000	0.000	0.000	0.000	0.000	0.000	0.000	0.000	156	534	14444	13658	0.538	Error	Error	8552	5892	0	0	8167	5491	0	0	0	0
2	3	3	""	"YDR222W"	6960	14400	150	6995	7005	2493	98	120	269	100	99	0	6720	6680	2313	289	332	346	98	96	0	0	0	0	0	0	0	0	0	0	0	0	0	0	0	0	0	0	0	1.072	1.081	1.087	1.106	1.388	1.075	0.924	0.000	0.000	0.000	0.000	0.000	0.000	0.000	0.000	0.000	0.000	0.000	0.000	0.000	0.000	156	628	13328	13298	0.101	Error	Error	6897	6431	0	0	6907	6391	0	0	0	0
2	4	3	"CHL4"	"YDR254W"	7160	14400	140	8244	7947	3266	98	181	601	98	96	0	16677	15236	6115	291	408	716	99	98	0	0	0	0	0	0	0	0	0	0	0	0	0	0	0	0	0	0	0	0.497	0.525	0.527	0.533	1.374	0.513	0.919	0.000	0.000	0.000	0.000	0.000	0.000	0.000	0.000	0.000	0.000	0.000	0.000	0.000	0.000	156	580	24532	22794	-1.008	Error	Error	8146	16386	0	0	7849	14945	0	0	0	0
2	5	3	"UBC8"	"YEL012W"	7350	14400	130	6103	5606	1661	99	140	315	100	100	0	4450	4198	1295	284	355	471	100	97	0	0	0	0	0	0	0	0	0	0	0	0	0	0	0	0	0	0	0	1.441	1.407	1.433	1.428	1.295	1.367	0.909	0.000	0.000	0.000	0.000	0.000	0.000	0.000	0.000	0.000	0.000	0.000	0.000	0.000	0.000	120	529	10170	9421	0.527	Error	Error	6004	4166	0	0	5507	3914	0	0	0	0
2	6	3	"GDA1"	"YEL042W"	7550	14410	120	3854	3926	2116	95	167	438	96	90	0	2886	3006	1566	289	420	736	86	80	0	0	0	0	0	0	0	0	0	0	0	0	0	0	0	0	0	0	0	1.447	1.410	1.439	1.480	1.531	1.335	0.887	0.000	0.000	0.000	0.000	0.000	0.000	0.000	0.000	0.000	0.000	0.000	0.000	0.000	0.000	120	530	6356	6548	0.534	Error	Error	3759	2597	0	0	3831	2717	0	0	0	0
2	7	3	""	"YEL073C"	7740	14410	120	348	343	129	87	97	118	84	57	0	637	655	256	280	292	99	88	74	0	0	0	0	0	0	0	0	0	0	0	0	0	0	0	0	0	0	0	0.731	0.683	0.660	0.713	1.899	0.511	0.573	0.000	0.000	0.000	0.000	0.000	0.000	0.000	0.000	0.000	0.000	0.000	0.000	0.000	0.000	120	475	618	631	-0.452	Error	Error	261	357	0	0	256	375	0	0	0	0
2	8	3	""	"YEL014C"	7930	14410	130	3854	3738	1196	91	162	470	96	94	0	2525	2436	915	272	327	387	95	90	0	0	0	0	0	0	0	0	0	0	0	0	0	0	0	0	0	0	0	1.670	1.685	1.702	1.782	1.398	1.643	0.902	0.000	0.000	0.000	0.000	0.000	0.000	0.000	0.000	0.000	0.000	0.000	0.000	0.000	0.000	120	588	6016	5811	0.740	Error	Error	3763	2253	0	0	3647	2164	0	0	0	0
2	9	3	""	"YEL044W"	8130	14410	130	3210	3089	1347	87	103	129	100	100	0	2273	2203	982	268	296	222	95	92	0	0	0	0	0	0	0	0	0	0	0	0	0	0	0	0	0	0	0	1.558	1.551	1.554	1.604	1.430	1.501	0.879	0.000	0.000	0.000	0.000	0.000	0.000	0.000	0.000	0.000	0.000	0.000	0.000	0.000	0.000	120	538	5128	4937	0.639	Error	Error	3123	2005	0	0	3002	1935	0	0	0	0
2	10	3	""	"YEL075C"	8310	14400	130	37560	36170	14519	94	273	1652	100	98	0	23716	20879	8201	270	515	2068	95	91	0	0	0	0	0	0	0	0	0	0	0	0	0	0	0	0	0	0	0	1.598	1.750	1.757	1.782	1.351	1.759	0.936	0.000	0.000	0.000	0.000	0.000	0.000	0.000	0.000	0.000	0.000	0.000	0.000	0.000	0.000	120	518	60912	56685	0.676	Error	Error	37466	23446	0	0	36076	20609	0	0	0	0
2	11	3	""	"YEL016C"	8510	14400	130	9884	9460	2780	109	295	1646	100	98	0	6720	6683	1762	290	541	2064	99	88	0	0	0	0	0	0	0	0	0	0	0	0	0	0	0	0	0	0	0	1.520	1.463	1.476	1.450	1.212	1.341	0.843	0.000	0.000	0.000	0.000	0.000	0.000	0.000	0.000	0.000	0.000	0.000	0.000	0.000	0.000	120	522	16205	15744	0.604	Error	Error	9775	6430	0	0	9351	6393	0	0	0	0
2	12	3	"GLY1"	"YEL046C"	8700	14400	130	6908	6409	2076	117	145	119	100	100	0	4652	4510	1321	306	339	202	100	100	0	0	0	0	0	0	0	0	0	0	0	0	0	0	0	0	0	0	0	1.563	1.497	1.538	1.474	1.273	1.511	0.905	0.000	0.000	0.000	0.000	0.000	0.000	0.000	0.000	0.000	0.000	0.000	0.000	0.000	0.000	120	490	11137	10496	0.644	Error	Error	6791	4346	0	0	6292	4204	0	0	0	0
2	13	3	""	"YEL076C-A"	8880	14400	130	34684	32469	12232	133	195	297	100	100	0	18830	18147	6281	317	402	543	100	100	0	0	0	0	0	0	0	0	0	0	0	0	0	0	0	0	0	0	0	1.866	1.814	1.847	1.785	1.317	1.821	0.928	0.000	0.000	0.000	0.000	0.000	0.000	0.000	0.000	0.000	0.000	0.000	0.000	0.000	0.000	120	557	53064	50166	0.900	Error	Error	34551	18513	0	0	32336	17830	0	0	0	0
2	14	3	""	"YEL017W"	9100	14420	110	613	632	273	137	209	328	75	18	0	702	826	396	320	408	595	36	8	0	0	0	0	0	0	0	0	0	0	0	0	0	0	0	0	0	0	0	1.246	0.978	0.952	1.091	2.507	0.723	0.483	0.000	0.000	0.000	0.000	0.000	0.000	0.000	0.000	0.000	0.000	0.000	0.000	0.000	0.000	80	450	858	1001	0.317	Error	Error	476	382	0	0	495	506	0	0	0	0
2	15	3	""	"YEL048C"	9260	14410	130	3268	3141	985	104	123	85	100	100	0	4108	3926	1260	291	313	133	98	97	0	0	0	0	0	0	0	0	0	0	0	0	0	0	0	0	0	0	0	0.829	0.835	0.826	0.867	1.399	0.777	0.898	0.000	0.000	0.000	0.000	0.000	0.000	0.000	0.000	0.000	0.000	0.000	0.000	0.000	0.000	120	492	6981	6672	-0.271	Error	Error	3164	3817	0	0	3037	3635	0	0	0	0
2	16	3	""	"YEL077C"	9460	14410	130	36651	37713	13284	99	112	70	100	100	2	25889	26473	7885	282	295	100	100	100	0	0	0	0	0	0	0	0	0	0	0	0	0	0	0	0	0	0	0	1.427	1.436	1.461	1.407	1.245	1.468	0.924	0.000	0.000	0.000	0.000	0.000	0.000	0.000	0.000	0.000	0.000	0.000	0.000	0.000	0.000	120	539	62159	63805	0.513	Error	Error	36552	25607	0	0	37614	26191	0	0	0	0
2	17	3	"RPL29"	"YFR032C-A"	9650	14410	130	1305	1232	453	91	105	69	95	94	0	1153	1130	472	275	286	101	89	88	0	0	0	0	0	0	0	0	0	0	0	0	0	0	0	0	0	0	0	1.383	1.335	1.328	1.354	1.791	1.202	0.791	0.000	0.000	0.000	0.000	0.000	0.000	0.000	0.000	0.000	0.000	0.000	0.000	0.000	0.000	120	538	2092	1996	0.467	Error	Error	1214	878	0	0	1141	855	0	0	0	0
2	18	3	""	"YGL007W"	9840	14400	130	3082	2868	1008	86	94	52	100	99	0	2017	1894	666	272	282	102	95	95	0	0	0	0	0	0	0	0	0	0	0	0	0	0	0	0	0	0	0	1.717	1.715	1.725	1.743	1.402	1.676	0.892	0.000	0.000	0.000	0.000	0.000	0.000	0.000	0.000	0.000	0.000	0.000	0.000	0.000	0.000	120	531	4741	4404	0.780	Error	Error	2996	1745	0	0	2782	1622	0	0	0	0
2	19	3	""	"YGL039W"	10030	14400	130	6966	6216	2421	90	106	109	100	100	0	11973	10987	4385	279	339	543	97	95	0	0	0	0	0	0	0	0	0	0	0	0	0	0	0	0	0	0	0	0.588	0.572	0.568	0.582	1.406	0.554	0.925	0.000	0.000	0.000	0.000	0.000	0.000	0.000	0.000	0.000	0.000	0.000	0.000	0.000	0.000	120	525	18570	16834	-0.766	Error	Error	6876	11694	0	0	6126	10708	0	0	0	0
2	20	3	"pho4"	"YFR034C"	10230	14410	130	3851	3539	1100	94	108	105	100	100	0	2387	2251	687	281	342	526	95	88	0	0	0	0	0	0	0	0	0	0	0	0	0	0	0	0	0	0	0	1.784	1.749	1.792	1.814	1.459	1.618	0.708	0.000	0.000	0.000	0.000	0.000	0.000	0.000	0.000	0.000	0.000	0.000	0.000	0.000	0.000	120	555	5863	5415	0.835	Error	Error	3757	2106	0	0	3445	1970	0	0	0	0
2	21	3	"leu1"	"YGL009C"	10410	14400	130	8423	8223	3327	91	137	285	100	100	0	11878	12029	4315	280	396	763	100	99	0	0	0	0	0	0	0	0	0	0	0	0	0	0	0	0	0	0	0	0.718	0.692	0.713	0.685	1.326	0.685	0.918	0.000	0.000	0.000	0.000	0.000	0.000	0.000	0.000	0.000	0.000	0.000	0.000	0.000	0.000	120	509	19930	19881	-0.477	Error	Error	8332	11598	0	0	8132	11749	0	0	0	0
2	22	3	""	"YGL041C"	10600	14410	120	3671	3337	1364	93	112	170	96	94	0	5657	5163	2303	283	371	699	88	85	0	0	0	0	0	0	0	0	0	0	0	0	0	0	0	0	0	0	0	0.666	0.665	0.681	0.728	1.625	0.593	0.860	0.000	0.000	0.000	0.000	0.000	0.000	0.000	0.000	0.000	0.000	0.000	0.000	0.000	0.000	120	572	8952	8124	-0.587	Error	Error	3578	5374	0	0	3244	4880	0	0	0	0
2	1	4	"cdc26"	"YFR036W"	6620	14590	130	3718	3475	1170	93	129	262	100	98	0	3274	3088	1066	276	341	419	96	90	0	0	0	0	0	0	0	0	0	0	0	0	0	0	0	0	0	0	0	1.209	1.203	1.195	1.237	1.449	1.190	0.902	0.000	0.000	0.000	0.000	0.000	0.000	0.000	0.000	0.000	0.000	0.000	0.000	0.000	0.000	120	637	6623	6194	0.274	Error	Error	3625	2998	0	0	3382	2812	0	0	0	0
2	2	4	"SCL1"	"YGL011C"	6810	14590	130	8605	8050	2748	97	103	48	100	100	0	20080	19474	6609	287	311	125	100	100	0	0	0	0	0	0	0	0	0	0	0	0	0	0	0	0	0	0	0	0.430	0.414	0.419	0.414	1.319	0.390	0.923	0.000	0.000	0.000	0.000	0.000	0.000	0.000	0.000	0.000	0.000	0.000	0.000	0.000	0.000	120	537	28301	27140	-1.218	Error	Error	8508	19793	0	0	7953	19187	0	0	0	0
2	3	4	"dst1"	"YGL043W"	6990	14600	110	3319	3558	2151	98	171	471	98	93	0	4081	4434	2430	291	424	766	95	92	0	0	0	0	0	0	0	0	0	0	0	0	0	0	0	0	0	0	0	0.850	0.835	0.822	0.831	1.472	0.817	0.847	0.000	0.000	0.000	0.000	0.000	0.000	0.000	0.000	0.000	0.000	0.000	0.000	0.000	0.000	80	461	7011	7603	-0.235	Error	Error	3221	3790	0	0	3460	4143	0	0	0	0
2	4	4	""	"YFR038W"	7190	14600	130	6678	6474	2576	95	156	421	99	96	0	8812	8246	3307	281	391	688	96	93	0	0	0	0	0	0	0	0	0	0	0	0	0	0	0	0	0	0	0	0.772	0.801	0.793	0.835	1.427	0.775	0.902	0.000	0.000	0.000	0.000	0.000	0.000	0.000	0.000	0.000	0.000	0.000	0.000	0.000	0.000	120	580	15114	14344	-0.374	Error	Error	6583	8531	0	0	6379	7965	0	0	0	0
2	5	4	"PDR1"	"YGL013C"	7380	14600	130	4194	5127	3147	99	117	186	100	100	0	14069	14639	7473	279	315	253	100	100	0	0	0	0	0	0	0	0	0	0	0	0	0	0	0	0	0	0	0	0.297	0.350	0.352	0.342	1.453	0.346	0.879	0.000	0.000	0.000	0.000	0.000	0.000	0.000	0.000	0.000	0.000	0.000	0.000	0.000	0.000	120	535	17885	19388	-1.752	Error	Error	4095	13790	0	0	5028	14360	0	0	0	0
2	6	4	""	"YGL045W"	7570	14600	140	8369	8705	4292	100	111	116	99	98	0	12132	12133	6269	287	303	102	98	98	0	0	0	0	0	0	0	0	0	0	0	0	0	0	0	0	0	0	0	0.698	0.726	0.728	0.761	1.440	0.700	0.942	0.000	0.000	0.000	0.000	0.000	0.000	0.000	0.000	0.000	0.000	0.000	0.000	0.000	0.000	156	575	20114	20451	-0.518	Error	Error	8269	11845	0	0	8605	11846	0	0	0	0
2	7	4	"PRP31"	"YGR091W"	7770	14600	130	7238	6961	1709	93	175	516	100	100	0	5359	5000	1439	283	330	370	100	98	0	0	0	0	0	0	0	0	0	0	0	0	0	0	0	0	0	0	0	1.408	1.456	1.437	1.504	1.282	1.420	0.908	0.000	0.000	0.000	0.000	0.000	0.000	0.000	0.000	0.000	0.000	0.000	0.000	0.000	0.000	120	549	12221	11585	0.493	Error	Error	7145	5076	0	0	6868	4717	0	0	0	0
2	8	4	"MEP1"	"YGR121C"	7960	14610	110	9410	8679	3303	94	194	572	97	95	0	6072	5707	2279	281	340	420	95	95	0	0	0	0	0	0	0	0	0	0	0	0	0	0	0	0	0	0	0	1.609	1.582	1.575	1.619	1.445	1.556	0.891	0.000	0.000	0.000	0.000	0.000	0.000	0.000	0.000	0.000	0.000	0.000	0.000	0.000	0.000	80	436	15107	14011	0.686	Error	Error	9316	5791	0	0	8585	5426	0	0	0	0
2	9	4	"rsr1"	"YGR152C"	8130	14600	110	1109	1134	595	89	114	156	96	93	0	1207	1328	693	274	313	249	93	83	0	0	0	0	0	0	0	0	0	0	0	0	0	0	0	0	0	0	0	1.093	0.991	1.044	0.997	1.750	0.928	0.697	0.000	0.000	0.000	0.000	0.000	0.000	0.000	0.000	0.000	0.000	0.000	0.000	0.000	0.000	80	461	1953	2099	0.129	Error	Error	1020	933	0	0	1045	1054	0	0	0	0
2	10	4	""	"YGR093W"	8340	14600	130	7499	6901	2247	102	211	1312	95	92	0	4911	4789	1540	278	414	1223	94	89	0	0	0	0	0	0	0	0	0	0	0	0	0	0	0	0	0	0	0	1.597	1.507	1.517	1.533	1.348	1.421	0.756	0.000	0.000	0.000	0.000	0.000	0.000	0.000	0.000	0.000	0.000	0.000	0.000	0.000	0.000	120	563	12030	11310	0.675	Error	Error	7397	4633	0	0	6799	4511	0	0	0	0
2	11	4	""	"YGR122W"	8520	14600	140	9406	8823	3400	106	154	385	98	98	0	13632	12753	4938	282	377	679	97	95	0	0	0	0	0	0	0	0	0	0	0	0	0	0	0	0	0	0	0	0.697	0.699	0.694	0.708	1.536	0.686	0.925	0.000	0.000	0.000	0.000	0.000	0.000	0.000	0.000	0.000	0.000	0.000	0.000	0.000	0.000	156	570	22650	21188	-0.522	Error	Error	9300	13350	0	0	8717	12471	0	0	0	0
2	12	4	""	"YGR154C"	8710	14600	130	8749	7809	2774	106	128	87	100	100	0	4688	4391	1618	288	317	153	98	97	0	0	0	0	0	0	0	0	0	0	0	0	0	0	0	0	0	0	0	1.964	1.877	1.883	1.964	1.474	1.837	0.897	0.000	0.000	0.000	0.000	0.000	0.000	0.000	0.000	0.000	0.000	0.000	0.000	0.000	0.000	120	506	13043	11806	0.974	Error	Error	8643	4400	0	0	7703	4103	0	0	0	0
2	13	4	"RRP46"	"YGR095C"	8900	14600	130	3905	3776	1313	110	152	278	100	100	0	9601	9471	3380	302	360	528	100	99	0	0	0	0	0	0	0	0	0	0	0	0	0	0	0	0	0	0	0	0.408	0.400	0.396	0.403	1.290	0.371	0.911	0.000	0.000	0.000	0.000	0.000	0.000	0.000	0.000	0.000	0.000	0.000	0.000	0.000	0.000	120	510	13094	12835	-1.293	Error	Error	3795	9299	0	0	3666	9169	0	0	0	0
2	14	4	"ASN2"	"YGR124W"	9090	14600	140	8566	8281	3143	116	158	135	99	99	0	6473	6016	2460	298	347	215	96	95	0	0	0	0	0	0	0	0	0	0	0	0	0	0	0	0	0	0	0	1.368	1.428	1.391	1.495	1.825	1.411	0.913	0.000	0.000	0.000	0.000	0.000	0.000	0.000	0.000	0.000	0.000	0.000	0.000	0.000	0.000	156	507	14625	13883	0.453	Error	Error	8450	6175	0	0	8165	5718	0	0	0	0
2	15	4	""	"YGR156W"	9280	14600	140	6275	5994	2029	101	128	168	99	99	0	3909	3641	1251	290	320	233	97	94	0	0	0	0	0	0	0	0	0	0	0	0	0	0	0	0	0	0	0	1.706	1.759	1.730	1.876	1.781	1.750	0.894	0.000	0.000	0.000	0.000	0.000	0.000	0.000	0.000	0.000	0.000	0.000	0.000	0.000	0.000	156	504	9793	9244	0.771	Error	Error	6174	3619	0	0	5893	3351	0	0	0	0
2	16	4	"ASK10"	"YGR097W"	9480	14600	140	1240	1382	852	96	107	60	96	93	0	3004	3278	2206	275	284	91	96	93	0	0	0	0	0	0	0	0	0	0	0	0	0	0	0	0	0	0	0	0.419	0.428	0.414	0.445	1.758	0.387	0.860	0.000	0.000	0.000	0.000	0.000	0.000	0.000	0.000	0.000	0.000	0.000	0.000	0.000	0.000	156	521	3873	4289	-1.254	Error	Error	1144	2729	0	0	1286	3003	0	0	0	0
2	17	4	""	"YGR126W"	9650	14600	130	4171	4144	1166	88	97	50	100	100	0	5077	4859	1397	267	279	102	100	100	0	0	0	0	0	0	0	0	0	0	0	0	0	0	0	0	0	0	0	0.849	0.883	0.900	0.889	1.261	0.852	0.912	0.000	0.000	0.000	0.000	0.000	0.000	0.000	0.000	0.000	0.000	0.000	0.000	0.000	0.000	120	476	8893	8648	-0.236	Error	Error	4083	4810	0	0	4056	4592	0	0	0	0
2	18	4	"MTR3"	"YGR158C"	9840	14600	130	5279	5048	1612	91	121	250	100	100	0	12634	11819	4000	275	394	948	100	97	0	0	0	0	0	0	0	0	0	0	0	0	0	0	0	0	0	0	0	0.420	0.429	0.428	0.439	1.306	0.395	0.913	0.000	0.000	0.000	0.000	0.000	0.000	0.000	0.000	0.000	0.000	0.000	0.000	0.000	0.000	120	541	17547	16501	-1.252	Error	Error	5188	12359	0	0	4957	11544	0	0	0	0
2	19	4	""	"YHR113W"	10030	14600	130	7675	7316	2286	94	121	194	100	100	0	4262	4055	1300	278	406	970	97	87	0	0	0	0	0	0	0	0	0	0	0	0	0	0	0	0	0	0	0	1.903	1.912	1.908	1.942	1.340	1.831	0.727	0.000	0.000	0.000	0.000	0.000	0.000	0.000	0.000	0.000	0.000	0.000	0.000	0.000	0.000	120	550	11565	10999	0.928	Error	Error	7581	3984	0	0	7222	3777	0	0	0	0
2	20	4	""	"YHR143W"	10230	14610	130	6299	5814	2169	94	107	90	100	100	0	5156	4880	1824	280	307	212	98	96	0	0	0	0	0	0	0	0	0	0	0	0	0	0	0	0	0	0	0	1.273	1.243	1.221	1.278	1.378	1.238	0.907	0.000	0.000	0.000	0.000	0.000	0.000	0.000	0.000	0.000	0.000	0.000	0.000	0.000	0.000	120	522	11081	10320	0.348	Error	Error	6205	4876	0	0	5720	4600	0	0	0	0
2	21	4	"ENO2"	"YHR174W"	10420	14600	130	8806	8143	2886	93	148	480	99	98	0	11476	10387	3672	278	418	925	97	95	0	0	0	0	0	0	0	0	0	0	0	0	0	0	0	0	0	0	0	0.778	0.796	0.808	0.821	1.479	0.775	0.911	0.000	0.000	0.000	0.000	0.000	0.000	0.000	0.000	0.000	0.000	0.000	0.000	0.000	0.000	120	512	19911	18159	-0.362	Error	Error	8713	11198	0	0	8050	10109	0	0	0	0
2	22	4	""	"YHR115C"	10600	14600	130	8532	7730	2410	96	181	603	99	97	0	10059	9410	3326	286	473	1147	96	94	0	0	0	0	0	0	0	0	0	0	0	0	0	0	0	0	0	0	0	0.863	0.837	0.833	0.863	1.520	0.787	0.913	0.000	0.000	0.000	0.000	0.000	0.000	0.000	0.000	0.000	0.000	0.000	0.000	0.000	0.000	120	616	18209	16758	-0.212	Error	Error	8436	9773	0	0	7634	9124	0	0	0	0
2	1	5	"DCD1"	"YHR144C"	6620	14790	130	6951	6395	1792	91	116	238	100	100	0	6118	5780	1647	264	352	831	99	96	0	0	0	0	0	0	0	0	0	0	0	0	0	0	0	0	0	0	0	1.172	1.143	1.160	1.146	1.286	1.102	0.913	0.000	0.000	0.000	0.000	0.000	0.000	0.000	0.000	0.000	0.000	0.000	0.000	0.000	0.000	120	623	12714	11820	0.229	Error	Error	6860	5854	0	0	6304	5516	0	0	0	0
2	2	5	""	"YHR176W"	6810	14790	130	7556	6922	1972	95	157	427	100	100	0	7470	7194	2223	290	438	854	100	98	0	0	0	0	0	0	0	0	0	0	0	0	0	0	0	0	0	0	0	1.039	0.989	0.980	0.998	1.258	0.941	0.921	0.000	0.000	0.000	0.000	0.000	0.000	0.000	0.000	0.000	0.000	0.000	0.000	0.000	0.000	120	505	14641	13731	0.055	Error	Error	7461	7180	0	0	6827	6904	0	0	0	0
2	3	5	"TOM71"	"YHR117W"	7000	14790	130	6929	6679	2818	96	180	502	100	99	0	10431	9983	3774	289	526	1361	98	95	0	0	0	0	0	0	0	0	0	0	0	0	0	0	0	0	0	0	0	0.674	0.679	0.693	0.681	1.386	0.666	0.918	0.000	0.000	0.000	0.000	0.000	0.000	0.000	0.000	0.000	0.000	0.000	0.000	0.000	0.000	120	549	16975	16277	-0.570	Error	Error	6833	10142	0	0	6583	9694	0	0	0	0
2	4	5	""	"YHR146W"	7200	14790	130	6040	5756	1955	90	99	52	100	100	0	5117	4838	1562	274	312	290	99	99	0	0	0	0	0	0	0	0	0	0	0	0	0	0	0	0	0	0	0	1.229	1.241	1.246	1.261	1.372	1.247	0.902	0.000	0.000	0.000	0.000	0.000	0.000	0.000	0.000	0.000	0.000	0.000	0.000	0.000	0.000	120	482	10793	10230	0.297	Error	Error	5950	4843	0	0	5666	4564	0	0	0	0
2	5	5	"STB5"	"YHR178W"	7380	14790	130	9626	9592	2855	96	127	257	100	100	0	6108	5944	1751	280	333	382	100	100	0	0	0	0	0	0	0	0	0	0	0	0	0	0	0	0	0	0	0	1.635	1.677	1.687	1.690	1.246	1.660	0.931	0.000	0.000	0.000	0.000	0.000	0.000	0.000	0.000	0.000	0.000	0.000	0.000	0.000	0.000	120	493	15358	15160	0.709	Error	Error	9530	5828	0	0	9496	5664	0	0	0	0
2	6	5	"SET1"	"YHR119W"	7570	14790	130	13352	12563	4443	102	135	262	100	100	0	9351	9104	3018	288	352	428	100	99	0	0	0	0	0	0	0	0	0	0	0	0	0	0	0	0	0	0	0	1.462	1.413	1.450	1.416	1.283	1.406	0.917	0.000	0.000	0.000	0.000	0.000	0.000	0.000	0.000	0.000	0.000	0.000	0.000	0.000	0.000	120	493	22313	21277	0.548	Error	Error	13250	9063	0	0	12461	8816	0	0	0	0
2	7	5	"IMP3"	"YHR148W"	7760	14790	130	6141	5949	2360	97	110	76	100	100	0	11954	11301	4746	292	318	233	99	99	0	0	0	0	0	0	0	0	0	0	0	0	0	0	0	0	0	0	0	0.518	0.532	0.534	0.553	1.382	0.504	0.910	0.000	0.000	0.000	0.000	0.000	0.000	0.000	0.000	0.000	0.000	0.000	0.000	0.000	0.000	120	477	17706	16861	-0.948	Error	Error	6044	11662	0	0	5852	11009	0	0	0	0
2	8	5	""	"YHR180W"	7950	14790	140	3699	3343	1233	93	117	227	98	95	0	3986	3624	1392	285	298	117	95	94	0	0	0	0	0	0	0	0	0	0	0	0	0	0	0	0	0	0	0	0.974	0.973	0.986	1.043	1.735	0.956	0.901	0.000	0.000	0.000	0.000	0.000	0.000	0.000	0.000	0.000	0.000	0.000	0.000	0.000	0.000	156	486	7307	6589	-0.038	Error	Error	3606	3701	0	0	3250	3339	0	0	0	0
2	9	5	""	"YJL049W"	8140	14790	140	4793	4545	1925	90	106	102	99	97	0	20172	19624	8699	278	303	171	98	98	0	0	0	0	0	0	0	0	0	0	0	0	0	0	0	0	0	0	0	0.236	0.230	0.241	0.232	1.576	0.219	0.914	0.000	0.000	0.000	0.000	0.000	0.000	0.000	0.000	0.000	0.000	0.000	0.000	0.000	0.000	156	511	24597	23801	-2.081	Error	Error	4703	19894	0	0	4455	19346	0	0	0	0
2	10	5	"ARP4"	"YJL081C"	8320	14790	130	8994	8466	2971	87	95	42	100	100	0	23985	22305	7258	271	287	96	100	100	0	0	0	0	0	0	0	0	0	0	0	0	0	0	0	0	0	0	0	0.376	0.380	0.379	0.374	1.301	0.367	0.926	0.000	0.000	0.000	0.000	0.000	0.000	0.000	0.000	0.000	0.000	0.000	0.000	0.000	0.000	120	485	32621	30413	-1.413	Error	Error	8907	23714	0	0	8379	22034	0	0	0	0
2	11	5	""	"YJL113W"	8490	14780	110	665	714	335	87	109	93	96	91	0	2054	2093	930	271	346	359	97	90	0	0	0	0	0	0	0	0	0	0	0	0	0	0	0	0	0	0	0	0.324	0.344	0.317	0.333	1.592	0.300	0.800	0.000	0.000	0.000	0.000	0.000	0.000	0.000	0.000	0.000	0.000	0.000	0.000	0.000	0.000	80	401	2361	2449	-1.625	Error	Error	578	1783	0	0	627	1822	0	0	0	0
2	12	5	""	"YJL051W"	8690	14790	140	8731	8705	5077	90	138	342	98	95	0	5287	5043	2843	271	363	478	87	83	0	0	0	0	0	0	0	0	0	0	0	0	0	0	0	0	0	0	0	1.723	1.805	1.810	2.096	2.190	1.838	0.907	0.000	0.000	0.000	0.000	0.000	0.000	0.000	0.000	0.000	0.000	0.000	0.000	0.000	0.000	156	525	13657	13387	0.785	Error	Error	8641	5016	0	0	8615	4772	0	0	0	0
2	13	5	""	"YJL083W"	8880	14790	140	7011	6692	3533	94	121	246	98	94	0	4147	3805	1996	276	337	580	89	82	0	0	0	0	0	0	0	0	0	0	0	0	0	0	0	0	0	0	0	1.787	1.870	1.881	1.914	1.560	1.878	0.900	0.000	0.000	0.000	0.000	0.000	0.000	0.000	0.000	0.000	0.000	0.000	0.000	0.000	0.000	156	470	10788	10127	0.837	Error	Error	6917	3871	0	0	6598	3529	0	0	0	0
2	14	5	"asf1"	"YJL115W"	9070	14790	140	10645	9345	3328	91	125	284	98	98	0	7344	6634	2629	274	335	500	92	90	0	0	0	0	0	0	0	0	0	0	0	0	0	0	0	0	0	0	0	1.493	1.455	1.464	1.567	1.538	1.412	0.923	0.000	0.000	0.000	0.000	0.000	0.000	0.000	0.000	0.000	0.000	0.000	0.000	0.000	0.000	156	474	17624	15614	0.578	Error	Error	10554	7070	0	0	9254	6360	0	0	0	0
2	15	5	"PEP8"	"YJL053W"	9260	14780	130	7746	7114	2420	90	137	378	100	100	0	4307	4006	1453	276	330	411	97	94	0	0	0	0	0	0	0	0	0	0	0	0	0	0	0	0	0	0	0	1.899	1.883	1.902	2.003	1.553	1.855	0.914	0.000	0.000	0.000	0.000	0.000	0.000	0.000	0.000	0.000	0.000	0.000	0.000	0.000	0.000	120	480	11687	10754	0.925	Error	Error	7656	4031	0	0	7024	3730	0	0	0	0
2	16	5	"EXO70"	"YJL085W"	9460	14790	130	9193	8861	3105	90	136	373	100	99	0	15041	13725	4977	266	323	407	100	99	0	0	0	0	0	0	0	0	0	0	0	0	0	0	0	0	0	0	0	0.616	0.652	0.670	0.660	1.336	0.618	0.910	0.000	0.000	0.000	0.000	0.000	0.000	0.000	0.000	0.000	0.000	0.000	0.000	0.000	0.000	120	495	23878	22230	-0.699	Error	Error	9103	14775	0	0	8771	13459	0	0	0	0
2	17	5	"PHO86"	"YJL117W"	9650	14790	130	8648	7778	3371	87	94	46	100	100	0	5466	4985	2252	266	276	96	98	95	0	0	0	0	0	0	0	0	0	0	0	0	0	0	0	0	0	0	0	1.646	1.630	1.635	1.782	1.650	1.605	0.907	0.000	0.000	0.000	0.000	0.000	0.000	0.000	0.000	0.000	0.000	0.000	0.000	0.000	0.000	120	444	13761	12410	0.719	Error	Error	8561	5200	0	0	7691	4719	0	0	0	0
2	18	5	""	"YJL055W"	9820	14780	130	9159	8159	2742	90	186	661	99	98	0	4467	4197	1451	283	402	760	95	89	0	0	0	0	0	0	0	0	0	0	0	0	0	0	0	0	0	0	0	2.168	2.062	2.087	2.113	1.435	2.040	0.900	0.000	0.000	0.000	0.000	0.000	0.000	0.000	0.000	0.000	0.000	0.000	0.000	0.000	0.000	120	479	13253	11983	1.116	Error	Error	9069	4184	0	0	8069	3914	0	0	0	0
2	19	5	"TRL1"	"YJL087C"	10020	14780	130	6336	6774	3703	94	201	661	100	97	0	7254	7810	4113	282	452	987	93	90	0	0	0	0	0	0	0	0	0	0	0	0	0	0	0	0	0	0	0	0.895	0.887	0.876	0.931	1.503	0.874	0.911	0.000	0.000	0.000	0.000	0.000	0.000	0.000	0.000	0.000	0.000	0.000	0.000	0.000	0.000	120	521	13214	14208	-0.160	Error	Error	6242	6972	0	0	6680	7528	0	0	0	0
2	20	5	""	"YJL119C"	10200	14780	130	3263	3057	1211	95	110	104	100	99	0	2155	1974	831	274	309	236	91	87	0	0	0	0	0	0	0	0	0	0	0	0	0	0	0	0	0	0	0	1.684	1.742	1.764	1.836	1.547	1.703	0.854	0.000	0.000	0.000	0.000	0.000	0.000	0.000	0.000	0.000	0.000	0.000	0.000	0.000	0.000	120	470	5049	4662	0.752	Error	Error	3168	1881	0	0	2962	1700	0	0	0	0
2	21	5	"PHD1"	"YKL043W"	10390	14780	130	13974	12409	3837	101	297	1322	99	95	0	7202	6670	2222	275	462	1019	95	93	0	0	0	0	0	0	0	0	0	0	0	0	0	0	0	0	0	0	0	2.003	1.925	1.906	1.961	1.343	1.915	0.917	0.000	0.000	0.000	0.000	0.000	0.000	0.000	0.000	0.000	0.000	0.000	0.000	0.000	0.000	120	487	20800	18703	1.002	Error	Error	13873	6927	0	0	12308	6395	0	0	0	0
2	22	5	"MUD2"	"YKL074C"	10580	14780	130	9398	8558	2715	107	341	1319	96	93	0	5964	5593	1807	284	561	1272	94	90	0	0	0	0	0	0	0	0	0	0	0	0	0	0	0	0	0	0	0	1.636	1.592	1.582	1.627	1.565	1.585	0.892	0.000	0.000	0.000	0.000	0.000	0.000	0.000	0.000	0.000	0.000	0.000	0.000	0.000	0.000	120	607	14971	13760	0.710	Error	Error	9291	5680	0	0	8451	5309	0	0	0	0
2	1	6	""	"YKL105C"	6590	14970	130	5569	6655	4388	95	161	507	99	96	0	12350	14528	9095	264	465	1453	97	95	0	0	0	0	0	0	0	0	0	0	0	0	0	0	0	0	0	0	0	0.453	0.460	0.464	0.462	1.382	0.447	0.916	0.000	0.000	0.000	0.000	0.000	0.000	0.000	0.000	0.000	0.000	0.000	0.000	0.000	0.000	120	607	17560	20824	-1.143	Error	Error	5474	12086	0	0	6560	14264	0	0	0	0
2	2	6	"PRI2"	"YKL045W"	6790	14970	140	7895	7198	2528	100	208	629	98	95	0	4744	4470	1476	295	588	1620	92	81	0	0	0	0	0	0	0	0	0	0	0	0	0	0	0	0	0	0	0	1.752	1.700	1.692	1.733	1.449	1.573	0.712	0.000	0.000	0.000	0.000	0.000	0.000	0.000	0.000	0.000	0.000	0.000	0.000	0.000	0.000	156	582	12244	11273	0.809	Error	Error	7795	4449	0	0	7098	4175	0	0	0	0
2	3	6	""	"YKL076C"	6970	14970	130	5315	4807	1552	101	220	662	96	94	0	17017	15703	5391	299	775	2469	94	91	0	0	0	0	0	0	0	0	0	0	0	0	0	0	0	0	0	0	0	0.312	0.306	0.305	0.312	1.349	0.288	0.928	0.000	0.000	0.000	0.000	0.000	0.000	0.000	0.000	0.000	0.000	0.000	0.000	0.000	0.000	120	475	21932	20110	-1.681	Error	Error	5214	16718	0	0	4706	15404	0	0	0	0
2	4	6	""	"YKL107W"	7170	14970	150	179	256	205	108	228	612	2	0	0	515	775	602	299	647	2110	2	0	0	0	0	0	0	0	0	0	0	0	0	0	0	0	0	0	0	0	0	0.329	0.311	0.324	0.362	3.075	0.221	0.853	0.000	0.000	0.000	0.000	0.000	0.000	0.000	0.000	0.000	0.000	0.000	0.000	0.000	0.000	156	622	287	624	-1.605	Error	Error	71	216	0	0	148	476	0	0	-50	0
2	5	6	""	"YKL047W"	7350	14970	130	9396	9016	2666	105	131	239	100	100	0	10348	9700	2944	302	337	250	100	100	0	0	0	0	0	0	0	0	0	0	0	0	0	0	0	0	0	0	0	0.925	0.948	0.965	0.960	1.227	0.934	0.937	0.000	0.000	0.000	0.000	0.000	0.000	0.000	0.000	0.000	0.000	0.000	0.000	0.000	0.000	120	486	19337	18309	-0.113	Error	Error	9291	10046	0	0	8911	9398	0	0	0	0
2	6	6	""	"YKL078W"	7540	14970	130	9775	9744	3692	110	519	2389	99	90	0	8493	8090	2721	319	576	1530	99	95	0	0	0	0	0	0	0	0	0	0	0	0	0	0	0	0	0	0	0	1.182	1.240	1.247	1.232	1.284	1.244	0.921	0.000	0.000	0.000	0.000	0.000	0.000	0.000	0.000	0.000	0.000	0.000	0.000	0.000	0.000	120	563	17839	17405	0.242	Error	Error	9665	8174	0	0	9634	7771	0	0	0	0
2	7	6	"HAP4"	"YKL109W"	7730	14970	130	5922	5476	1757	108	123	86	100	100	0	3976	3699	1171	312	349	281	98	96	0	0	0	0	0	0	0	0	0	0	0	0	0	0	0	0	0	0	0	1.587	1.585	1.612	1.615	1.305	1.583	0.899	0.000	0.000	0.000	0.000	0.000	0.000	0.000	0.000	0.000	0.000	0.000	0.000	0.000	0.000	120	509	9478	8755	0.666	Error	Error	5814	3664	0	0	5368	3387	0	0	0	0
2	8	6	"CSE4"	"YKL049C"	7920	14970	140	5629	5071	1830	105	172	398	96	94	0	4085	3709	1464	302	376	470	91	89	0	0	0	0	0	0	0	0	0	0	0	0	0	0	0	0	0	0	0	1.460	1.458	1.459	1.597	1.811	1.408	0.914	0.000	0.000	0.000	0.000	0.000	0.000	0.000	0.000	0.000	0.000	0.000	0.000	0.000	0.000	156	557	9307	8373	0.546	Error	Error	5524	3783	0	0	4966	3407	0	0	0	0
2	9	6	"VMA5"	"YKL080W"	8110	14970	130	4967	4501	1397	92	97	45	100	100	0	3668	3604	947	275	293	128	100	100	0	0	0	0	0	0	0	0	0	0	0	0	0	0	0	0	0	0	0	1.437	1.324	1.343	1.295	1.305	1.381	0.903	0.000	0.000	0.000	0.000	0.000	0.000	0.000	0.000	0.000	0.000	0.000	0.000	0.000	0.000	120	477	8268	7738	0.523	Error	Error	4875	3393	0	0	4409	3329	0	0	0	0
2	10	6	""	"YKL111C"	8300	14970	120	773	772	270	84	89	39	99	98	0	1751	3701	8296	261	274	89	97	95	0	0	0	0	0	0	0	0	0	0	0	0	0	0	0	0	0	0	0	0.462	0.200	0.449	0.396	2.414	0.034	0.219	0.000	0.000	0.000	0.000	0.000	0.000	0.000	0.000	0.000	0.000	0.000	0.000	0.000	0.000	120	498	2179	4128	-1.113	Error	Error	689	1490	0	0	688	3440	0	0	-100	0
2	11	6	"snf7"	"YLR025W"	8500	14970	130	7148	6363	2410	85	95	69	100	100	0	7531	6908	2834	266	301	254	96	95	0	0	0	0	0	0	0	0	0	0	0	0	0	0	0	0	0	0	0	0.972	0.945	0.955	1.025	1.703	0.920	0.907	0.000	0.000	0.000	0.000	0.000	0.000	0.000	0.000	0.000	0.000	0.000	0.000	0.000	0.000	120	532	14328	12920	-0.041	Error	Error	7063	7265	0	0	6278	6642	0	0	0	0
2	12	6	"ERG3"	"YLR056W"	8670	14970	130	6521	5952	2233	93	289	1001	95	88	0	4202	3836	1479	272	427	747	91	87	0	0	0	0	0	0	0	0	0	0	0	0	0	0	0	0	0	0	0	1.636	1.644	1.635	1.713	1.530	1.601	0.886	0.000	0.000	0.000	0.000	0.000	0.000	0.000	0.000	0.000	0.000	0.000	0.000	0.000	0.000	120	525	10358	9423	0.710	Error	Error	6428	3930	0	0	5859	3564	0	0	0	0
2	13	6	"GAA1"	"YLR088W"	8870	14970	130	7193	6855	2865	96	166	463	96	93	0	7638	7387	3093	275	406	824	94	90	0	0	0	0	0	0	0	0	0	0	0	0	0	0	0	0	0	0	0	0.964	0.950	0.960	0.961	1.454	0.911	0.877	0.000	0.000	0.000	0.000	0.000	0.000	0.000	0.000	0.000	0.000	0.000	0.000	0.000	0.000	120	506	14460	13871	-0.053	Error	Error	7097	7363	0	0	6759	7112	0	0	0	0
2	14	6	"AAT2"	"YLR027C"	9050	14970	130	5441	5391	1992	95	164	440	100	95	0	3901	3724	1379	276	409	824	94	88	0	0	0	0	0	0	0	0	0	0	0	0	0	0	0	0	0	0	0	1.475	1.536	1.573	1.580	1.363	1.432	0.824	0.000	0.000	0.000	0.000	0.000	0.000	0.000	0.000	0.000	0.000	0.000	0.000	0.000	0.000	120	527	8971	8744	0.560	Error	Error	5346	3625	0	0	5296	3448	0	0	0	0
2	15	6	"SHM2"	"YLR058C"	9250	14970	130	5644	5354	2256	92	172	475	97	95	0	10893	10248	4223	275	422	816	95	91	0	0	0	0	0	0	0	0	0	0	0	0	0	0	0	0	0	0	0	0.523	0.528	0.534	0.569	1.722	0.510	0.917	0.000	0.000	0.000	0.000	0.000	0.000	0.000	0.000	0.000	0.000	0.000	0.000	0.000	0.000	120	547	16170	15235	-0.935	Error	Error	5552	10618	0	0	5262	9973	0	0	0	0
2	16	6	"XDJ1"	"YLR090W"	9440	14970	130	7656	7777	3292	92	140	364	100	98	0	9561	9531	3980	275	399	775	97	95	0	0	0	0	0	0	0	0	0	0	0	0	0	0	0	0	0	0	0	0.815	0.830	0.837	0.838	1.329	0.809	0.904	0.000	0.000	0.000	0.000	0.000	0.000	0.000	0.000	0.000	0.000	0.000	0.000	0.000	0.000	120	513	16850	16941	-0.296	Error	Error	7564	9286	0	0	7685	9256	0	0	0	0
2	17	6	"RPL15A"	"YLR029C"	9630	14970	140	3575	3325	1544	87	96	74	99	98	0	2995	2740	1492	273	305	279	87	83	0	0	0	0	0	0	0	0	0	0	0	0	0	0	0	0	0	0	0	1.281	1.313	1.321	1.456	1.958	1.216	0.798	0.000	0.000	0.000	0.000	0.000	0.000	0.000	0.000	0.000	0.000	0.000	0.000	0.000	0.000	156	515	6210	5705	0.358	Error	Error	3488	2722	0	0	3238	2467	0	0	0	0
2	18	6	"FRS1"	"YLR060W"	9830	14970	140	5594	5430	2253	88	170	631	94	92	0	3619	3331	1522	283	355	527	88	84	0	0	0	0	0	0	0	0	0	0	0	0	0	0	0	0	0	0	0	1.650	1.753	1.728	1.925	1.950	1.710	0.891	0.000	0.000	0.000	0.000	0.000	0.000	0.000	0.000	0.000	0.000	0.000	0.000	0.000	0.000	156	513	8842	8390	0.723	Error	Error	5506	3336	0	0	5342	3048	0	0	0	0
2	19	6	"SUL2"	"YLR092W"	10010	14970	130	7285	6987	2897	93	190	639	97	95	0	6974	6986	3047	280	424	862	96	91	0	0	0	0	0	0	0	0	0	0	0	0	0	0	0	0	0	0	0	1.074	1.028	1.034	1.057	1.409	0.985	0.923	0.000	0.000	0.000	0.000	0.000	0.000	0.000	0.000	0.000	0.000	0.000	0.000	0.000	0.000	120	551	13886	13600	0.104	Error	Error	7192	6694	0	0	6894	6706	0	0	0	0
2	20	6	""	"YLR031W"	10220	14970	140	3942	3439	1282	92	168	561	92	89	0	2782	2529	945	274	404	807	88	80	0	0	0	0	0	0	0	0	0	0	0	0	0	0	0	0	0	0	0	1.535	1.484	1.475	1.523	1.632	1.343	0.795	0.000	0.000	0.000	0.000	0.000	0.000	0.000	0.000	0.000	0.000	0.000	0.000	0.000	0.000	156	577	6358	5602	0.618	Error	Error	3850	2508	0	0	3347	2255	0	0	0	0
2	21	6	""	"YLR062C"	10400	14970	130	2059	1834	691	94	223	1116	81	20	0	2181	2047	818	271	368	751	84	74	0	0	0	0	0	0	0	0	0	0	0	0	0	0	0	0	0	0	0	1.029	0.980	0.981	1.035	1.516	0.934	0.858	0.000	0.000	0.000	0.000	0.000	0.000	0.000	0.000	0.000	0.000	0.000	0.000	0.000	0.000	120	509	3875	3516	0.041	Error	Error	1965	1910	0	0	1740	1776	0	0	0	0
2	22	6	"GIS3"	"YLR094C"	10590	14970	130	5060	4959	2132	93	151	431	95	93	0	3168	3055	1410	273	343	511	88	86	0	0	0	0	0	0	0	0	0	0	0	0	0	0	0	0	0	0	0	1.716	1.749	1.696	1.802	1.652	1.698	0.901	0.000	0.000	0.000	0.000	0.000	0.000	0.000	0.000	0.000	0.000	0.000	0.000	0.000	0.000	120	662	7862	7648	0.779	Error	Error	4967	2895	0	0	4866	2782	0	0	0	0
2	1	7	""	"YLR400W"	6600	15160	130	5592	5031	1773	95	150	437	96	95	0	3106	2916	1059	274	398	1074	87	77	0	0	0	0	0	0	0	0	0	0	0	0	0	0	0	0	0	0	0	1.941	1.868	1.844	1.865	1.558	1.843	0.909	0.000	0.000	0.000	0.000	0.000	0.000	0.000	0.000	0.000	0.000	0.000	0.000	0.000	0.000	120	715	8329	7578	0.957	Error	Error	5497	2832	0	0	4936	2642	0	0	0	0
2	2	7	"sen1"	"YLR430W"	6810	15160	90	275	285	135	99	124	159	51	13	0	571	581	204	282	328	264	53	17	0	0	0	0	0	0	0	0	0	0	0	0	0	0	0	0	0	0	0	0.609	0.622	0.551	0.569	2.072	0.419	0.353	0.000	0.000	0.000	0.000	0.000	0.000	0.000	0.000	0.000	0.000	0.000	0.000	0.000	0.000	52	367	465	485	-0.715	Error	Error	176	289	0	0	186	299	0	0	0	0
2	3	7	"PAU4"	"YLR461W"	6990	15160	130	9688	10108	7237	102	154	408	97	90	0	13072	13160	8955	292	506	1755	83	75	0	0	0	0	0	0	0	0	0	0	0	0	0	0	0	0	0	0	0	0.750	0.778	0.773	0.826	1.730	0.779	0.926	0.000	0.000	0.000	0.000	0.000	0.000	0.000	0.000	0.000	0.000	0.000	0.000	0.000	0.000	120	608	22366	22874	-0.415	Error	Error	9586	12780	0	0	10006	12868	0	0	0	0
2	4	7	""	"YLR402W"	7180	15180	110	5953	5706	2456	113	227	580	100	95	0	2686	2615	1171	291	364	372	91	88	0	0	0	0	0	0	0	0	0	0	0	0	0	0	0	0	0	0	0	2.438	2.407	2.368	2.607	1.493	2.328	0.895	0.000	0.000	0.000	0.000	0.000	0.000	0.000	0.000	0.000	0.000	0.000	0.000	0.000	0.000	80	458	8235	7917	1.286	Error	Error	5840	2395	0	0	5593	2324	0	0	0	0
2	5	7	""	"YLR432W"	7380	15170	120	17512	15965	8441	118	831	3578	87	78	0	19563	18414	9753	329	644	1838	95	88	0	0	0	0	0	0	0	0	0	0	0	0	0	0	0	0	0	0	0	0.904	0.876	0.899	0.903	1.538	0.872	0.919	0.000	0.000	0.000	0.000	0.000	0.000	0.000	0.000	0.000	0.000	0.000	0.000	0.000	0.000	120	592	36628	33932	-0.145	Error	Error	17394	19234	0	0	15847	18085	0	0	0	0
2	6	7	""	"YLR463C"	7590	15180	110	32901	28360	10984	120	992	4023	97	90	0	15343	14910	5905	332	730	2131	96	92	0	0	0	0	0	0	0	0	0	0	0	0	0	0	0	0	0	0	0	2.184	1.937	1.997	1.968	1.368	1.944	0.903	0.000	0.000	0.000	0.000	0.000	0.000	0.000	0.000	0.000	0.000	0.000	0.000	0.000	0.000	80	473	47792	42818	1.127	Error	Error	32781	15011	0	0	28240	14578	0	0	0	0
2	7	7	""	"YLR404W"	7760	15170	130	5557	5380	2270	117	191	448	98	95	0	7122	6628	2630	322	395	497	96	95	0	0	0	0	0	0	0	0	0	0	0	0	0	0	0	0	0	0	0	0.800	0.835	0.853	0.850	1.525	0.812	0.896	0.000	0.000	0.000	0.000	0.000	0.000	0.000	0.000	0.000	0.000	0.000	0.000	0.000	0.000	120	582	12240	11569	-0.322	Error	Error	5440	6800	0	0	5263	6306	0	0	0	0
2	8	7	""	"YLR434C"	7960	15180	110	4749	4210	1876	107	193	446	92	88	0	5458	5080	2450	304	394	522	88	87	0	0	0	0	0	0	0	0	0	0	0	0	0	0	0	0	0	0	0	0.901	0.859	0.900	0.892	1.810	0.807	0.887	0.000	0.000	0.000	0.000	0.000	0.000	0.000	0.000	0.000	0.000	0.000	0.000	0.000	0.000	80	478	9796	8879	-0.151	Error	Error	4642	5154	0	0	4103	4776	0	0	0	0
2	9	7	""	"YLR465C"	8130	15170	120	24439	21184	9912	98	109	64	100	100	0	14036	11851	5703	275	306	196	96	95	0	0	0	0	0	0	0	0	0	0	0	0	0	0	0	0	0	0	0	1.769	1.822	1.833	2.048	1.824	1.825	0.923	0.000	0.000	0.000	0.000	0.000	0.000	0.000	0.000	0.000	0.000	0.000	0.000	0.000	0.000	120	537	38102	32662	0.823	Error	Error	24341	13761	0	0	21086	11576	0	0	0	0
2	10	7	"RPL31B"	"YLR406C"	8340	15170	120	692	687	299	89	99	60	98	95	0	959	978	411	265	286	169	88	81	0	0	0	0	0	0	0	0	0	0	0	0	0	0	0	0	0	0	0	0.869	0.839	0.821	0.874	1.794	0.757	0.754	0.000	0.000	0.000	0.000	0.000	0.000	0.000	0.000	0.000	0.000	0.000	0.000	0.000	0.000	120	562	1297	1311	-0.203	Error	Error	603	694	0	0	598	713	0	0	0	0
2	11	7	"ECM30"	"YLR436C"	8530	15160	130	4916	5843	3620	90	332	1571	95	84	0	5367	5588	3114	267	377	693	93	90	0	0	0	0	0	0	0	0	0	0	0	0	0	0	0	0	0	0	0	0.946	1.081	1.070	1.133	1.511	1.193	0.807	0.000	0.000	0.000	0.000	0.000	0.000	0.000	0.000	0.000	0.000	0.000	0.000	0.000	0.000	120	565	9926	11074	-0.080	Error	Error	4826	5100	0	0	5753	5321	0	0	0	0
2	12	7	"YRF1-5"	"YLR467W"	8720	15180	110	15443	14883	8926	94	403	1744	92	86	0	14065	12792	7642	269	419	813	93	91	0	0	0	0	0	0	0	0	0	0	0	0	0	0	0	0	0	0	0	1.113	1.181	1.170	1.270	1.812	1.205	0.902	0.000	0.000	0.000	0.000	0.000	0.000	0.000	0.000	0.000	0.000	0.000	0.000	0.000	0.000	80	464	29145	27312	0.154	Error	Error	15349	13796	0	0	14789	12523	0	0	0	0
2	13	7	""	"YMR160W"	8900	15170	130	11174	10538	3652	92	113	253	100	100	0	8873	8343	2532	269	312	477	100	99	0	0	0	0	0	0	0	0	0	0	0	0	0	0	0	0	0	0	0	1.288	1.294	1.283	1.285	1.293	1.303	0.927	0.000	0.000	0.000	0.000	0.000	0.000	0.000	0.000	0.000	0.000	0.000	0.000	0.000	0.000	120	587	19686	18520	0.365	Error	Error	11082	8604	0	0	10446	8074	0	0	0	0
2	14	7	"SGS1"	"YMR190C"	9090	15180	110	408	450	240	92	100	88	91	85	0	832	853	430	268	292	189	87	67	0	0	0	0	0	0	0	0	0	0	0	0	0	0	0	0	0	0	0	0.560	0.612	0.596	0.662	1.907	0.488	0.614	0.000	0.000	0.000	0.000	0.000	0.000	0.000	0.000	0.000	0.000	0.000	0.000	0.000	0.000	80	459	880	943	-0.836	Error	Error	316	564	0	0	358	585	0	0	0	0
2	15	7	"ERG8"	"YMR220W"	9280	15170	140	10644	9578	4069	93	105	128	100	98	0	16318	14628	7629	281	336	563	94	92	0	0	0	0	0	0	0	0	0	0	0	0	0	0	0	0	0	0	0	0.658	0.661	0.644	0.757	1.963	0.610	0.904	0.000	0.000	0.000	0.000	0.000	0.000	0.000	0.000	0.000	0.000	0.000	0.000	0.000	0.000	156	606	26588	23832	-0.604	Error	Error	10551	16037	0	0	9485	14347	0	0	0	0
2	16	7	""	"YMR162C"	9470	15170	120	356	364	130	88	95	71	91	82	0	1030	1020	415	275	291	204	90	80	0	0	0	0	0	0	0	0	0	0	0	0	0	0	0	0	0	0	0	0.355	0.370	0.381	0.380	2.008	0.308	0.680	0.000	0.000	0.000	0.000	0.000	0.000	0.000	0.000	0.000	0.000	0.000	0.000	0.000	0.000	120	458	1023	1021	-1.494	Error	Error	268	755	0	0	276	745	0	0	0	0
2	17	7	""	"YMR192W"	9650	15170	130	7216	7236	3147	86	116	237	100	98	0	5211	5248	2280	272	318	374	97	96	0	0	0	0	0	0	0	0	0	0	0	0	0	0	0	0	0	0	0	1.444	1.437	1.418	1.476	1.378	1.388	0.923	0.000	0.000	0.000	0.000	0.000	0.000	0.000	0.000	0.000	0.000	0.000	0.000	0.000	0.000	120	451	12069	12126	0.530	Error	Error	7130	4939	0	0	7150	4976	0	0	0	0
2	18	7	""	"YMR222C"	9830	15160	150	115	142	99	90	115	211	6	1	0	311	345	193	271	313	334	7	0	0	0	0	0	0	0	0	0	0	0	0	0	0	0	0	0	0	0	0	0.625	0.703	0.522	0.574	3.339	0.583	0.741	0.000	0.000	0.000	0.000	0.000	0.000	0.000	0.000	0.000	0.000	0.000	0.000	0.000	0.000	156	574	65	126	-0.678	Error	Error	25	40	0	0	52	74	0	0	-50	0
2	19	7	"MSS11"	"YMR164C"	10050	15180	130	306	306	127	91	125	381	7	0	0	534	579	346	270	327	508	14	1	0	0	0	0	0	0	0	0	0	0	0	0	0	0	0	0	0	0	0	0.814	0.696	0.669	0.740	2.389	0.399	0.478	0.000	0.000	0.000	0.000	0.000	0.000	0.000	0.000	0.000	0.000	0.000	0.000	0.000	0.000	120	558	479	524	-0.296	Error	Error	215	264	0	0	215	309	0	0	0	0
2	20	7	"MRPL24"	"YMR193W"	10240	15170	140	4912	4703	1972	89	94	37	100	100	0	3775	3460	1442	270	282	101	95	94	0	0	0	0	0	0	0	0	0	0	0	0	0	0	0	0	0	0	0	1.376	1.446	1.450	1.491	1.660	1.459	0.903	0.000	0.000	0.000	0.000	0.000	0.000	0.000	0.000	0.000	0.000	0.000	0.000	0.000	0.000	156	529	8328	7804	0.461	Error	Error	4823	3505	0	0	4614	3190	0	0	0	0
2	21	7	"MRE11"	"YMR224C"	10420	15170	130	954	987	508	89	94	38	98	97	0	1615	1646	939	277	288	111	91	89	0	0	0	0	0	0	0	0	0	0	0	0	0	0	0	0	0	0	0	0.646	0.656	0.704	0.697	1.827	0.570	0.802	0.000	0.000	0.000	0.000	0.000	0.000	0.000	0.000	0.000	0.000	0.000	0.000	0.000	0.000	120	494	2203	2267	-0.629	Error	Error	865	1338	0	0	898	1369	0	0	0	0
2	22	7	""	"YMR166C"	10610	15170	130	8857	8010	2928	92	110	126	100	99	0	4762	4476	1654	283	313	196	96	95	0	0	0	0	0	0	0	0	0	0	0	0	0	0	0	0	0	0	0	1.957	1.888	1.917	2.007	1.588	1.899	0.919	0.000	0.000	0.000	0.000	0.000	0.000	0.000	0.000	0.000	0.000	0.000	0.000	0.000	0.000	120	635	13244	12111	0.969	Error	Error	8765	4479	0	0	7918	4193	0	0	0	0
2	1	8	"RPL36A"	"YMR194W"	6620	15360	130	5510	5156	1801	90	114	213	99	98	0	3649	3586	1319	264	296	236	97	95	0	0	0	0	0	0	0	0	0	0	0	0	0	0	0	0	0	0	0	1.601	1.525	1.537	1.580	1.575	1.494	0.908	0.000	0.000	0.000	0.000	0.000	0.000	0.000	0.000	0.000	0.000	0.000	0.000	0.000	0.000	120	680	8805	8388	0.679	Error	Error	5420	3385	0	0	5066	3322	0	0	0	0
2	2	8	""	"YMR226C"	6820	15360	130	8198	7429	3339	99	113	114	98	97	0	5761	5170	2325	281	313	233	95	94	0	0	0	0	0	0	0	0	0	0	0	0	0	0	0	0	0	0	0	1.478	1.499	1.545	1.582	1.655	1.494	0.894	0.000	0.000	0.000	0.000	0.000	0.000	0.000	0.000	0.000	0.000	0.000	0.000	0.000	0.000	120	607	13579	12219	0.564	Error	Error	8099	5480	0	0	7330	4889	0	0	0	0
2	3	8	""	"YNL207W"	7020	15360	120	244	265	121	101	120	267	14	1	0	519	548	241	284	315	348	25	5	0	0	0	0	0	0	0	0	0	0	0	0	0	0	0	0	0	0	0	0.609	0.621	0.613	0.631	2.442	0.304	0.429	0.000	0.000	0.000	0.000	0.000	0.000	0.000	0.000	0.000	0.000	0.000	0.000	0.000	0.000	120	476	378	428	-0.717	Error	Error	143	235	0	0	164	264	0	0	0	0
2	4	8	"lap3"	"YNL239W"	7200	15360	140	7024	6886	2709	105	147	386	98	98	0	3317	3161	1280	295	335	287	94	92	0	0	0	0	0	0	0	0	0	0	0	0	0	0	0	0	0	0	0	2.290	2.366	2.427	2.426	1.444	2.367	0.910	0.000	0.000	0.000	0.000	0.000	0.000	0.000	0.000	0.000	0.000	0.000	0.000	0.000	0.000	156	546	9941	9647	1.195	Error	Error	6919	3022	0	0	6781	2866	0	0	0	0
2	5	8	"bni1"	"YNL271C"	7390	15360	120	544	557	213	102	107	48	97	95	0	769	787	309	302	317	110	90	84	0	0	0	0	0	0	0	0	0	0	0	0	0	0	0	0	0	0	0	0.946	0.938	0.932	1.001	1.858	0.768	0.649	0.000	0.000	0.000	0.000	0.000	0.000	0.000	0.000	0.000	0.000	0.000	0.000	0.000	0.000	120	461	909	940	-0.079	Error	Error	442	467	0	0	455	485	0	0	0	0
2	6	8	"SSB2"	"YNL209W"	7580	15360	130	8350	7837	2766	106	296	2015	94	87	0	7048	6758	2367	307	372	793	95	92	0	0	0	0	0	0	0	0	0	0	0	0	0	0	0	0	0	0	0	1.223	1.198	1.224	1.217	1.428	1.197	0.885	0.000	0.000	0.000	0.000	0.000	0.000	0.000	0.000	0.000	0.000	0.000	0.000	0.000	0.000	120	522	14985	14182	0.290	Error	Error	8244	6741	0	0	7731	6451	0	0	0	0
2	7	8	"zwf1"	"YNL241C"	7770	15360	130	5737	5442	1733	103	110	48	100	100	0	12085	11346	3295	306	328	179	100	100	0	0	0	0	0	0	0	0	0	0	0	0	0	0	0	0	0	0	0	0.478	0.484	0.486	0.477	1.241	0.475	0.932	0.000	0.000	0.000	0.000	0.000	0.000	0.000	0.000	0.000	0.000	0.000	0.000	0.000	0.000	120	562	17413	16379	-1.064	Error	Error	5634	11779	0	0	5339	11040	0	0	0	0
2	8	8	"TOF1"	"YNL273W"	7960	15370	110	873	862	397	100	107	50	96	96	0	1560	1639	1012	292	319	198	95	92	0	0	0	0	0	0	0	0	0	0	0	0	0	0	0	0	0	0	0	0.610	0.566	0.590	0.578	1.558	0.419	0.666	0.000	0.000	0.000	0.000	0.000	0.000	0.000	0.000	0.000	0.000	0.000	0.000	0.000	0.000	80	452	2041	2109	-0.714	Error	Error	773	1268	0	0	762	1347	0	0	0	0
2	9	8	""	"YNL211C"	8140	15360	120	3910	3673	1279	99	106	47	100	98	0	8601	8157	3007	280	298	112	97	97	0	0	0	0	0	0	0	0	0	0	0	0	0	0	0	0	0	0	0	0.458	0.454	0.454	0.469	1.508	0.439	0.934	0.000	0.000	0.000	0.000	0.000	0.000	0.000	0.000	0.000	0.000	0.000	0.000	0.000	0.000	120	500	12132	11451	-1.127	Error	Error	3811	8321	0	0	3574	7877	0	0	0	0
2	10	8	"SLA2"	"YNL243W"	8330	15370	130	5228	5992	3413	91	104	112	100	100	0	3566	3798	1906	275	293	179	96	95	0	0	0	0	0	0	0	0	0	0	0	0	0	0	0	0	0	0	0	1.561	1.675	1.663	1.690	1.571	1.725	0.901	0.000	0.000	0.000	0.000	0.000	0.000	0.000	0.000	0.000	0.000	0.000	0.000	0.000	0.000	120	553	8428	9424	0.642	Error	Error	5137	3291	0	0	5901	3523	0	0	0	0
2	11	8	""	"YNL275W"	8530	15360	130	9209	8676	3307	91	98	48	100	100	0	12749	11717	4002	266	282	99	100	100	0	0	0	0	0	0	0	0	0	0	0	0	0	0	0	0	0	0	0	0.730	0.750	0.731	0.740	1.313	0.745	0.929	0.000	0.000	0.000	0.000	0.000	0.000	0.000	0.000	0.000	0.000	0.000	0.000	0.000	0.000	120	589	21601	20036	-0.453	Error	Error	9118	12483	0	0	8585	11451	0	0	0	0
2	12	8	""	"YNL213C"	8710	15360	130	5586	5241	1904	90	136	689	95	92	0	4566	4228	1571	264	300	260	96	95	0	0	0	0	0	0	0	0	0	0	0	0	0	0	0	0	0	0	0	1.278	1.299	1.314	1.305	1.419	1.255	0.900	0.000	0.000	0.000	0.000	0.000	0.000	0.000	0.000	0.000	0.000	0.000	0.000	0.000	0.000	120	528	9798	9115	0.353	Error	Error	5496	4302	0	0	5151	3964	0	0	0	0
2	13	8	""	"YNL245C"	8900	15360	130	4267	4079	1619	90	103	113	99	97	0	3510	3277	1249	269	313	313	94	92	0	0	0	0	0	0	0	0	0	0	0	0	0	0	0	0	0	0	0	1.289	1.326	1.319	1.340	1.485	1.308	0.879	0.000	0.000	0.000	0.000	0.000	0.000	0.000	0.000	0.000	0.000	0.000	0.000	0.000	0.000	120	531	7418	6997	0.366	Error	Error	4177	3241	0	0	3989	3008	0	0	0	0
2	14	8	"met2"	"YNL277W"	9090	15360	120	7114	7487	3454	92	106	102	100	99	0	5865	5499	2318	272	305	239	96	94	0	0	0	0	0	0	0	0	0	0	0	0	0	0	0	0	0	0	0	1.255	1.415	1.440	1.518	1.874	1.428	0.915	0.000	0.000	0.000	0.000	0.000	0.000	0.000	0.000	0.000	0.000	0.000	0.000	0.000	0.000	120	512	12615	12622	0.328	Error	Error	7022	5593	0	0	7395	5227	0	0	0	0
2	15	8	"ALG6"	"YOR002W"	9290	15360	130	8061	7674	2362	100	108	64	100	100	0	12077	11760	3339	285	315	374	100	100	0	0	0	0	0	0	0	0	0	0	0	0	0	0	0	0	0	0	0	0.675	0.660	0.670	0.655	1.247	0.652	0.939	0.000	0.000	0.000	0.000	0.000	0.000	0.000	0.000	0.000	0.000	0.000	0.000	0.000	0.000	120	486	19753	19049	-0.567	Error	Error	7961	11792	0	0	7574	11475	0	0	0	0
2	16	8	"DHS1"	"YOR033C"	9480	15360	140	7645	7559	3133	92	117	237	99	98	0	16009	15544	6231	277	309	315	98	97	0	0	0	0	0	0	0	0	0	0	0	0	0	0	0	0	0	0	0	0.480	0.489	0.482	0.492	1.654	0.482	0.931	0.000	0.000	0.000	0.000	0.000	0.000	0.000	0.000	0.000	0.000	0.000	0.000	0.000	0.000	156	484	23285	22734	-1.059	Error	Error	7553	15732	0	0	7467	15267	0	0	0	0
2	17	8	"CYT1"	"YOR065W"	9660	15360	140	5910	5330	2331	90	121	231	98	95	0	3566	3222	1563	264	314	375	92	85	0	0	0	0	0	0	0	0	0	0	0	0	0	0	0	0	0	0	0	1.763	1.771	1.734	1.888	1.689	1.727	0.890	0.000	0.000	0.000	0.000	0.000	0.000	0.000	0.000	0.000	0.000	0.000	0.000	0.000	0.000	156	485	9122	8198	0.818	Error	Error	5820	3302	0	0	5240	2958	0	0	0	0
2	18	8	""	"YOR004W"	9860	15360	140	5248	4744	2049	93	137	390	95	91	0	20604	18629	7876	268	369	877	96	93	0	0	0	0	0	0	0	0	0	0	0	0	0	0	0	0	0	0	0	0.253	0.253	0.260	0.258	1.673	0.247	0.931	0.000	0.000	0.000	0.000	0.000	0.000	0.000	0.000	0.000	0.000	0.000	0.000	0.000	0.000	156	513	25491	23012	-1.980	Error	Error	5155	20336	0	0	4651	18361	0	0	0	0
2	19	8	"SHE4"	"YOR035C"	10040	15360	130	7432	7198	2946	92	98	45	100	100	0	4859	4677	1750	266	288	127	100	100	0	0	0	0	0	0	0	0	0	0	0	0	0	0	0	0	0	0	0	1.598	1.611	1.609	1.586	1.330	1.642	0.920	0.000	0.000	0.000	0.000	0.000	0.000	0.000	0.000	0.000	0.000	0.000	0.000	0.000	0.000	120	471	11933	11517	0.676	Error	Error	7340	4593	0	0	7106	4411	0	0	0	0
2	20	8	"alg8"	"YOR067C"	10230	15360	130	7907	7707	3154	93	101	111	100	100	0	14853	14075	5505	269	297	312	100	99	0	0	0	0	0	0	0	0	0	0	0	0	0	0	0	0	0	0	0	0.536	0.551	0.551	0.555	1.390	0.537	0.922	0.000	0.000	0.000	0.000	0.000	0.000	0.000	0.000	0.000	0.000	0.000	0.000	0.000	0.000	120	484	22398	21420	-0.900	Error	Error	7814	14584	0	0	7614	13806	0	0	0	0
2	21	8	""	"YOR006C"	10420	15360	140	7443	6939	2689	92	103	111	99	98	0	13803	12704	5091	276	307	323	97	96	0	0	0	0	0	0	0	0	0	0	0	0	0	0	0	0	0	0	0	0.543	0.551	0.553	0.576	1.649	0.535	0.935	0.000	0.000	0.000	0.000	0.000	0.000	0.000	0.000	0.000	0.000	0.000	0.000	0.000	0.000	156	496	20878	19275	-0.880	Error	Error	7351	13527	0	0	6847	12428	0	0	0	0
2	22	8	"cyc2"	"YOR037W"	10600	15360	140	8537	7898	3242	94	104	78	100	99	0	9936	8898	3839	289	308	165	97	96	0	0	0	0	0	0	0	0	0	0	0	0	0	0	0	0	0	0	0	0.875	0.906	0.923	0.947	1.627	0.879	0.926	0.000	0.000	0.000	0.000	0.000	0.000	0.000	0.000	0.000	0.000	0.000	0.000	0.000	0.000	156	664	18090	16413	-0.192	Error	Error	8443	9647	0	0	7804	8609	0	0	0	0
2	1	9	"VPS5"	"YOR069W"	6620	15550	130	6790	6300	2164	85	105	163	100	99	0	19285	18334	6484	255	272	136	100	100	0	0	0	0	0	0	0	0	0	0	0	0	0	0	0	0	0	0	0	0.352	0.344	0.355	0.348	1.284	0.329	0.926	0.000	0.000	0.000	0.000	0.000	0.000	0.000	0.000	0.000	0.000	0.000	0.000	0.000	0.000	120	627	25735	24294	-1.505	Error	Error	6705	19030	0	0	6215	18079	0	0	0	0
2	2	9	"SLG1"	"YOR008C"	6810	15550	130	10447	10021	3702	88	98	71	100	100	0	11731	10858	3812	267	276	90	100	100	0	0	0	0	0	0	0	0	0	0	0	0	0	0	0	0	0	0	0	0.904	0.938	0.924	0.930	1.361	0.920	0.921	0.000	0.000	0.000	0.000	0.000	0.000	0.000	0.000	0.000	0.000	0.000	0.000	0.000	0.000	120	496	21823	20524	-0.146	Error	Error	10359	11464	0	0	9933	10591	0	0	0	0
2	3	9	"CKB2"	"YOR039W"	6980	15540	130	8761	7740	2595	94	193	740	98	95	0	5443	4989	1789	278	384	744	95	90	0	0	0	0	0	0	0	0	0	0	0	0	0	0	0	0	0	0	0	1.678	1.623	1.668	1.691	1.487	1.570	0.912	0.000	0.000	0.000	0.000	0.000	0.000	0.000	0.000	0.000	0.000	0.000	0.000	0.000	0.000	120	496	13832	12357	0.747	Error	Error	8667	5165	0	0	7646	4711	0	0	0	0
2	4	9	""	"YOR071C"	7180	15550	130	9334	9081	4725	99	200	744	95	92	0	9494	9057	4544	287	399	760	90	88	0	0	0	0	0	0	0	0	0	0	0	0	0	0	0	0	0	0	0	1.003	1.024	1.035	1.120	1.867	1.016	0.910	0.000	0.000	0.000	0.000	0.000	0.000	0.000	0.000	0.000	0.000	0.000	0.000	0.000	0.000	120	490	18442	17752	0.004	Error	Error	9235	9207	0	0	8982	8770	0	0	0	0
2	5	9	"ATF1"	"YOR377W"	7360	15540	130	9958	9295	3079	100	115	123	100	100	0	11931	10997	3479	297	340	382	100	100	0	0	0	0	0	0	0	0	0	0	0	0	0	0	0	0	0	0	0	0.847	0.859	0.868	0.862	1.332	0.841	0.921	0.000	0.000	0.000	0.000	0.000	0.000	0.000	0.000	0.000	0.000	0.000	0.000	0.000	0.000	120	485	21492	19895	-0.239	Error	Error	9858	11634	0	0	9195	10700	0	0	0	0
2	6	9	"HST2"	"YPL015C"	7560	15550	140	8907	8459	2746	99	110	110	100	100	0	10624	9952	3416	289	331	343	98	98	0	0	0	0	0	0	0	0	0	0	0	0	0	0	0	0	0	0	0	0.852	0.865	0.861	0.897	1.451	0.839	0.920	0.000	0.000	0.000	0.000	0.000	0.000	0.000	0.000	0.000	0.000	0.000	0.000	0.000	0.000	156	531	19143	18023	-0.231	Error	Error	8808	10335	0	0	8360	9663	0	0	0	0
2	7	9	""	"YPL047W"	7740	15550	120	3253	2825	1216	96	104	48	100	99	0	2168	1940	852	286	306	111	93	89	0	0	0	0	0	0	0	0	0	0	0	0	0	0	0	0	0	0	0	1.677	1.650	1.671	1.757	1.642	1.593	0.880	0.000	0.000	0.000	0.000	0.000	0.000	0.000	0.000	0.000	0.000	0.000	0.000	0.000	0.000	120	454	5039	4383	0.746	Error	Error	3157	1882	0	0	2729	1654	0	0	0	0
2	8	9	""	"YOR379C"	7930	15550	120	484	473	221	99	104	45	92	91	0	727	732	332	280	295	103	85	80	0	0	0	0	0	0	0	0	0	0	0	0	0	0	0	0	0	0	0	0.861	0.827	0.798	0.820	1.829	0.596	0.574	0.000	0.000	0.000	0.000	0.000	0.000	0.000	0.000	0.000	0.000	0.000	0.000	0.000	0.000	120	503	832	826	-0.215	Error	Error	385	447	0	0	374	452	0	0	0	0
2	9	9	""	"YPL017C"	8120	15550	120	7087	6480	2919	92	100	46	100	100	0	4661	4228	1911	276	288	99	97	96	0	0	0	0	0	0	0	0	0	0	0	0	0	0	0	0	0	0	0	1.595	1.616	1.636	1.688	1.556	1.585	0.898	0.000	0.000	0.000	0.000	0.000	0.000	0.000	0.000	0.000	0.000	0.000	0.000	0.000	0.000	120	488	11380	10340	0.674	Error	Error	6995	4385	0	0	6388	3952	0	0	0	0
2	10	9	"DIG1"	"YPL049C"	8310	15540	130	6716	6788	3036	96	128	311	100	99	0	4406	4392	2035	279	320	347	96	92	0	0	0	0	0	0	0	0	0	0	0	0	0	0	0	0	0	0	0	1.604	1.627	1.606	1.743	1.613	1.604	0.909	0.000	0.000	0.000	0.000	0.000	0.000	0.000	0.000	0.000	0.000	0.000	0.000	0.000	0.000	120	553	10747	10805	0.682	Error	Error	6620	4127	0	0	6692	4113	0	0	0	0
2	11	9	"FRE3"	"YOR381W"	8510	15560	100	587	586	249	95	135	357	73	12	0	741	755	351	286	339	395	55	15	0	0	0	0	0	0	0	0	0	0	0	0	0	0	0	0	0	0	0	1.081	1.047	1.045	1.120	1.914	0.923	0.556	0.000	0.000	0.000	0.000	0.000	0.000	0.000	0.000	0.000	0.000	0.000	0.000	0.000	0.000	80	415	947	960	0.113	Error	Error	492	455	0	0	491	469	0	0	0	0
2	12	9	""	"YPL019C"	8690	15550	130	5970	6654	3629	93	130	246	99	98	0	5007	5014	2391	270	308	226	97	94	0	0	0	0	0	0	0	0	0	0	0	0	0	0	0	0	0	0	0	1.241	1.383	1.344	1.446	1.759	1.415	0.889	0.000	0.000	0.000	0.000	0.000	0.000	0.000	0.000	0.000	0.000	0.000	0.000	0.000	0.000	120	574	10614	11305	0.311	Error	Error	5877	4737	0	0	6561	4744	0	0	0	0
2	13	9	"ARL3"	"YPL051W"	8880	15540	130	5440	5428	2082	89	99	88	100	100	0	8518	7976	3306	272	305	267	100	99	0	0	0	0	0	0	0	0	0	0	0	0	0	0	0	0	0	0	0	0.649	0.693	0.679	0.733	1.455	0.662	0.912	0.000	0.000	0.000	0.000	0.000	0.000	0.000	0.000	0.000	0.000	0.000	0.000	0.000	0.000	120	558	13597	13043	-0.624	Error	Error	5351	8246	0	0	5339	7704	0	0	0	0
2	14	9	""	"YOR383C"	9080	15550	130	6353	5630	2201	91	98	68	100	100	0	7880	7080	3049	272	297	194	98	95	0	0	0	0	0	0	0	0	0	0	0	0	0	0	0	0	0	0	0	0.823	0.814	0.829	0.907	1.717	0.772	0.925	0.000	0.000	0.000	0.000	0.000	0.000	0.000	0.000	0.000	0.000	0.000	0.000	0.000	0.000	120	535	13870	12347	-0.281	Error	Error	6262	7608	0	0	5539	6808	0	0	0	0
2	15	9	"ECM23"	"YPL021W"	9260	15540	130	3832	3646	1315	93	115	148	100	98	0	10296	9309	3709	272	374	785	95	92	0	0	0	0	0	0	0	0	0	0	0	0	0	0	0	0	0	0	0	0.373	0.393	0.385	0.433	1.681	0.366	0.914	0.000	0.000	0.000	0.000	0.000	0.000	0.000	0.000	0.000	0.000	0.000	0.000	0.000	0.000	120	516	13763	12590	-1.423	Error	Error	3739	10024	0	0	3553	9037	0	0	0	0
2	16	9	"KTR6"	"YPL053C"	9450	15540	130	4920	4622	1919	95	136	277	100	96	0	4008	3676	1627	270	404	852	88	79	0	0	0	0	0	0	0	0	0	0	0	0	0	0	0	0	0	0	0	1.291	1.329	1.320	1.509	2.086	1.229	0.764	0.000	0.000	0.000	0.000	0.000	0.000	0.000	0.000	0.000	0.000	0.000	0.000	0.000	0.000	120	502	8563	7933	0.368	Error	Error	4825	3738	0	0	4527	3406	0	0	0	0
2	17	9	""	"YPR078C"	9650	15550	130	8351	7826	3721	90	121	239	100	96	0	4847	4238	2095	268	310	329	89	86	0	0	0	0	0	0	0	0	0	0	0	0	0	0	0	0	0	0	0	1.804	1.949	1.926	2.188	2.048	1.917	0.882	0.000	0.000	0.000	0.000	0.000	0.000	0.000	0.000	0.000	0.000	0.000	0.000	0.000	0.000	120	512	12840	11706	0.851	Error	Error	8261	4579	0	0	7736	3970	0	0	0	0
2	18	9	"RPC40"	"YPR110C"	9840	15540	130	7591	6827	2368	91	187	695	98	95	0	8574	7832	3011	275	438	1187	94	90	0	0	0	0	0	0	0	0	0	0	0	0	0	0	0	0	0	0	0	0.904	0.891	0.901	0.939	1.491	0.843	0.912	0.000	0.000	0.000	0.000	0.000	0.000	0.000	0.000	0.000	0.000	0.000	0.000	0.000	0.000	120	509	15799	14293	-0.146	Error	Error	7500	8299	0	0	6736	7557	0	0	0	0
2	19	9	""	"YPR139C"	10030	15540	130	6198	5500	1895	89	195	714	97	93	0	4277	3889	1454	276	461	1199	90	80	0	0	0	0	0	0	0	0	0	0	0	0	0	0	0	0	0	0	0	1.527	1.498	1.514	1.554	1.457	1.337	0.787	0.000	0.000	0.000	0.000	0.000	0.000	0.000	0.000	0.000	0.000	0.000	0.000	0.000	0.000	120	521	10110	9024	0.611	Error	Error	6109	4001	0	0	5411	3613	0	0	0	0
2	20	9	"tef1"	"YPR080W"	10220	15540	130	10632	9755	3202	91	173	644	100	99	0	7743	7140	2371	271	394	783	96	94	0	0	0	0	0	0	0	0	0	0	0	0	0	0	0	0	0	0	0	1.411	1.407	1.403	1.451	1.434	1.415	0.884	0.000	0.000	0.000	0.000	0.000	0.000	0.000	0.000	0.000	0.000	0.000	0.000	0.000	0.000	120	552	18013	16533	0.496	Error	Error	10541	7472	0	0	9664	6869	0	0	0	0
2	21	9	""	"YPR112C"	10420	15550	130	7635	7721	3595	89	159	628	99	97	0	10178	9909	4172	264	371	761	99	96	0	0	0	0	0	0	0	0	0	0	0	0	0	0	0	0	0	0	0	0.761	0.791	0.790	0.786	1.364	0.792	0.903	0.000	0.000	0.000	0.000	0.000	0.000	0.000	0.000	0.000	0.000	0.000	0.000	0.000	0.000	120	532	17460	17277	-0.394	Error	Error	7546	9914	0	0	7632	9645	0	0	0	0
2	22	9	"kar3"	"YPR141C"	10610	15550	130	434	429	149	87	94	44	98	95	0	788	805	307	263	280	120	90	86	0	0	0	0	0	0	0	0	0	0	0	0	0	0	0	0	0	0	0	0.661	0.631	0.616	0.633	1.677	0.502	0.651	0.000	0.000	0.000	0.000	0.000	0.000	0.000	0.000	0.000	0.000	0.000	0.000	0.000	0.000	120	636	872	884	-0.597	Error	Error	347	525	0	0	342	542	0	0	0	0
2	1	10	"DIB1"	"YPR082C"	6620	15730	130	6309	5705	2084	83	101	180	100	99	0	5035	4658	1685	249	291	374	97	93	0	0	0	0	0	0	0	0	0	0	0	0	0	0	0	0	0	0	0	1.301	1.275	1.299	1.305	1.412	1.244	0.904	0.000	0.000	0.000	0.000	0.000	0.000	0.000	0.000	0.000	0.000	0.000	0.000	0.000	0.000	120	644	11012	10031	0.379	Error	Error	6226	4786	0	0	5622	4409	0	0	0	0
2	2	10	""	"YPR114W"	6810	15730	130	9088	8056	2415	86	111	205	100	100	0	4455	4296	1212	255	310	414	99	98	0	0	0	0	0	0	0	0	0	0	0	0	0	0	0	0	0	0	0	2.143	1.972	2.011	1.963	1.280	1.984	0.881	0.000	0.000	0.000	0.000	0.000	0.000	0.000	0.000	0.000	0.000	0.000	0.000	0.000	0.000	120	537	13202	12011	1.100	Error	Error	9002	4200	0	0	7970	4041	0	0	0	0
2	3	10	""	"YPR143W"	7000	15730	130	4003	3685	1348	91	170	614	96	93	0	4403	4052	1409	274	364	629	97	90	0	0	0	0	0	0	0	0	0	0	0	0	0	0	0	0	0	0	0	0.947	0.951	0.929	0.972	1.421	0.935	0.910	0.000	0.000	0.000	0.000	0.000	0.000	0.000	0.000	0.000	0.000	0.000	0.000	0.000	0.000	120	553	8041	7372	-0.078	Error	Error	3912	4129	0	0	3594	3778	0	0	0	0
2	4	10	""	"YPR084W"	7200	15740	140	12756	11066	3653	95	114	132	100	100	0	19374	17927	5742	283	316	259	98	98	0	0	0	0	0	0	0	0	0	0	0	0	0	0	0	0	0	0	0	0.663	0.622	0.631	0.634	1.445	0.620	0.922	0.000	0.000	0.000	0.000	0.000	0.000	0.000	0.000	0.000	0.000	0.000	0.000	0.000	0.000	156	595	31752	28615	-0.593	Error	Error	12661	19091	0	0	10971	17644	0	0	0	0
2	5	10	""	"YPR116W"	7390	15740	130	5828	5483	1967	95	110	121	100	100	0	3468	3258	1128	285	309	323	97	95	0	0	0	0	0	0	0	0	0	0	0	0	0	0	0	0	0	0	0	1.801	1.812	1.867	1.856	1.309	1.812	0.906	0.000	0.000	0.000	0.000	0.000	0.000	0.000	0.000	0.000	0.000	0.000	0.000	0.000	0.000	120	491	8916	8361	0.849	Error	Error	5733	3183	0	0	5388	2973	0	0	0	0
2	6	10	"ASN1"	"YPR145W"	7570	15740	140	8605	8207	2610	92	100	47	100	100	0	7453	7037	2449	284	295	104	98	98	0	0	0	0	0	0	0	0	0	0	0	0	0	0	0	0	0	0	0	1.187	1.202	1.213	1.252	1.495	1.175	0.904	0.000	0.000	0.000	0.000	0.000	0.000	0.000	0.000	0.000	0.000	0.000	0.000	0.000	0.000	156	544	15682	14868	0.248	Error	Error	8513	7169	0	0	8115	6753	0	0	0	0
2	7	10	""	"iYAL056W"	7770	15740	130	2907	2752	1062	99	110	89	98	98	0	3647	3468	1385	284	304	121	95	95	0	0	0	0	0	0	0	0	0	0	0	0	0	0	0	0	0	0	0	0.835	0.833	0.857	0.918	1.803	0.790	0.905	0.000	0.000	0.000	0.000	0.000	0.000	0.000	0.000	0.000	0.000	0.000	0.000	0.000	0.000	120	566	6171	5837	-0.260	Error	Error	2808	3363	0	0	2653	3184	0	0	0	0
2	8	10	""	"iYAL051W"	7970	15740	120	928	838	337	101	107	47	95	93	0	4595	4165	1700	278	299	121	96	96	0	0	0	0	0	0	0	0	0	0	0	0	0	0	0	0	0	0	0	0.192	0.190	0.194	0.189	1.363	0.183	0.890	0.000	0.000	0.000	0.000	0.000	0.000	0.000	0.000	0.000	0.000	0.000	0.000	0.000	0.000	120	507	5144	4624	-2.384	Error	Error	827	4317	0	0	737	3887	0	0	0	0
2	9	10	""	"iYAL046C"	8150	15740	120	1168	1061	416	96	98	38	98	97	0	1151	1100	415	267	275	86	94	90	0	0	0	0	0	0	0	0	0	0	0	0	0	0	0	0	0	0	0	1.213	1.158	1.159	1.202	1.575	1.113	0.820	0.000	0.000	0.000	0.000	0.000	0.000	0.000	0.000	0.000	0.000	0.000	0.000	0.000	0.000	120	485	1956	1798	0.278	Error	Error	1072	884	0	0	965	833	0	0	0	0
2	10	10	""	"iYAL031C"	8340	15740	120	2298	2103	862	97	114	274	95	91	0	2743	2549	1020	273	295	271	91	90	0	0	0	0	0	0	0	0	0	0	0	0	0	0	0	0	0	0	0	0.891	0.881	0.870	0.937	1.651	0.849	0.873	0.000	0.000	0.000	0.000	0.000	0.000	0.000	0.000	0.000	0.000	0.000	0.000	0.000	0.000	120	518	4671	4282	-0.166	Error	Error	2201	2470	0	0	2006	2276	0	0	0	0
2	11	10	""	"iYAL027W"	8530	15740	120	1840	1720	676	101	152	294	94	87	0	6801	6444	2613	276	312	196	97	95	0	0	0	0	0	0	0	0	0	0	0	0	0	0	0	0	0	0	0	0.267	0.262	0.266	0.265	1.532	0.247	0.896	0.000	0.000	0.000	0.000	0.000	0.000	0.000	0.000	0.000	0.000	0.000	0.000	0.000	0.000	120	582	8264	7787	-1.908	Error	Error	1739	6525	0	0	1619	6168	0	0	0	0
2	12	10	""	"iYAL023C"	8730	15750	110	3516	3007	1283	93	147	311	93	88	0	2467	2235	952	269	303	195	92	88	0	0	0	0	0	0	0	0	0	0	0	0	0	0	0	0	0	0	0	1.557	1.482	1.470	1.505	1.566	1.455	0.892	0.000	0.000	0.000	0.000	0.000	0.000	0.000	0.000	0.000	0.000	0.000	0.000	0.000	0.000	80	489	5621	4880	0.639	Error	Error	3423	2198	0	0	2914	1966	0	0	0	0
2	13	10	""	"iYAL007C"	8920	15740	130	4086	4050	1850	87	92	39	100	100	0	7096	7004	3194	269	281	105	98	97	0	0	0	0	0	0	0	0	0	0	0	0	0	0	0	0	0	0	0	0.586	0.588	0.588	0.628	1.578	0.574	0.921	0.000	0.000	0.000	0.000	0.000	0.000	0.000	0.000	0.000	0.000	0.000	0.000	0.000	0.000	120	579	10826	10698	-0.772	Error	Error	3999	6827	0	0	3963	6735	0	0	0	0
2	14	10	""	"iYAL003W"	9100	15740	130	5113	4784	2086	89	121	219	98	96	0	5541	5079	2229	272	303	199	96	95	0	0	0	0	0	0	0	0	0	0	0	0	0	0	0	0	0	0	0	0.954	0.977	0.989	1.035	1.495	0.946	0.915	0.000	0.000	0.000	0.000	0.000	0.000	0.000	0.000	0.000	0.000	0.000	0.000	0.000	0.000	120	578	10293	9502	-0.069	Error	Error	5024	5269	0	0	4695	4807	0	0	0	0
2	15	10	""	"iYAR002W"	9290	15740	120	2162	1955	713	86	99	116	97	95	0	4600	4179	1667	270	315	359	94	93	0	0	0	0	0	0	0	0	0	0	0	0	0	0	0	0	0	0	0	0.479	0.478	0.478	0.515	1.614	0.446	0.908	0.000	0.000	0.000	0.000	0.000	0.000	0.000	0.000	0.000	0.000	0.000	0.000	0.000	0.000	120	513	6406	5778	-1.061	Error	Error	2076	4330	0	0	1869	3909	0	0	0	0
2	16	10	""	"itL(CAA)A"	9480	15740	140	6460	5729	2147	87	109	191	100	98	0	6774	6366	2428	268	303	250	98	96	0	0	0	0	0	0	0	0	0	0	0	0	0	0	0	0	0	0	0	0.980	0.925	0.906	0.963	1.623	0.905	0.919	0.000	0.000	0.000	0.000	0.000	0.000	0.000	0.000	0.000	0.000	0.000	0.000	0.000	0.000	156	590	12879	11740	-0.030	Error	Error	6373	6506	0	0	5642	6098	0	0	0	0
2	17	10	""	"iYAR028W"	9670	15740	130	5579	4948	2229	88	95	43	100	100	0	6173	5642	2539	276	283	92	99	95	0	0	0	0	0	0	0	0	0	0	0	0	0	0	0	0	0	0	0	0.931	0.906	0.909	0.954	1.543	0.893	0.917	0.000	0.000	0.000	0.000	0.000	0.000	0.000	0.000	0.000	0.000	0.000	0.000	0.000	0.000	120	537	11388	10226	-0.103	Error	Error	5491	5897	0	0	4860	5366	0	0	0	0
2	18	10	""	"iYAR035W"	9860	15740	130	2251	2105	866	85	142	557	90	83	0	2057	1906	773	275	362	805	83	59	0	0	0	0	0	0	0	0	0	0	0	0	0	0	0	0	0	0	0	1.215	1.239	1.234	1.260	1.655	1.168	0.882	0.000	0.000	0.000	0.000	0.000	0.000	0.000	0.000	0.000	0.000	0.000	0.000	0.000	0.000	120	580	3948	3651	0.282	Error	Error	2166	1782	0	0	2020	1631	0	0	0	0
2	19	10	""	"iYBR162C"	10050	15740	120	4748	4271	1555	84	101	196	100	100	0	3382	3196	1130	272	294	199	98	96	0	0	0	0	0	0	0	0	0	0	0	0	0	0	0	0	0	0	0	1.500	1.432	1.467	1.451	1.353	1.446	0.896	0.000	0.000	0.000	0.000	0.000	0.000	0.000	0.000	0.000	0.000	0.000	0.000	0.000	0.000	120	531	7774	7111	0.585	Error	Error	4664	3110	0	0	4187	2924	0	0	0	0
2	20	10	""	"iYBR165W"	10240	15740	120	1087	996	377	85	128	537	83	35	0	2138	2005	786	262	314	501	89	83	0	0	0	0	0	0	0	0	0	0	0	0	0	0	0	0	0	0	0	0.534	0.523	0.519	0.537	1.606	0.483	0.841	0.000	0.000	0.000	0.000	0.000	0.000	0.000	0.000	0.000	0.000	0.000	0.000	0.000	0.000	120	531	2878	2654	-0.905	Error	Error	1002	1876	0	0	911	1743	0	0	0	0
2	21	10	""	"iYBR169C"	10430	15740	120	2805	2408	947	83	87	40	100	100	0	2113	1949	774	259	270	101	95	93	0	0	0	0	0	0	0	0	0	0	0	0	0	0	0	0	0	0	0	1.468	1.376	1.398	1.463	1.579	1.338	0.868	0.000	0.000	0.000	0.000	0.000	0.000	0.000	0.000	0.000	0.000	0.000	0.000	0.000	0.000	120	500	4576	4015	0.554	Error	Error	2722	1854	0	0	2325	1690	0	0	0	0
2	22	10	""	"iYBR187W"	10620	15750	130	2408	2174	828	84	94	83	100	99	0	1345	1310	520	262	285	193	90	85	0	0	0	0	0	0	0	0	0	0	0	0	0	0	0	0	0	0	0	2.146	1.994	2.016	2.092	1.642	1.976	0.852	0.000	0.000	0.000	0.000	0.000	0.000	0.000	0.000	0.000	0.000	0.000	0.000	0.000	0.000	120	630	3407	3138	1.102	Error	Error	2324	1083	0	0	2090	1048	0	0	0	0
2	1	11	""	"iYBR192W"	6630	15930	130	2619	2464	926	80	92	157	100	95	0	8120	7780	3143	245	280	312	97	96	0	0	0	0	0	0	0	0	0	0	0	0	0	0	0	0	0	0	0	0.322	0.316	0.323	0.330	1.437	0.284	0.881	0.000	0.000	0.000	0.000	0.000	0.000	0.000	0.000	0.000	0.000	0.000	0.000	0.000	0.000	120	655	10414	9919	-1.633	Error	Error	2539	7875	0	0	2384	7535	0	0	0	0
2	2	11	""	"iYBR196C"	6820	15930	130	6176	5879	2874	83	99	97	100	100	0	3427	3189	1309	255	288	222	96	94	0	0	0	0	0	0	0	0	0	0	0	0	0	0	0	0	0	0	0	1.921	1.975	2.046	2.003	1.537	2.061	0.875	0.000	0.000	0.000	0.000	0.000	0.000	0.000	0.000	0.000	0.000	0.000	0.000	0.000	0.000	120	564	9265	8730	0.942	Error	Error	6093	3172	0	0	5796	2934	0	0	0	0
2	3	11	""	"iYBRCdelta19"	7010	15930	130	3911	3836	1713	88	105	136	100	97	0	3520	3370	1442	272	295	194	95	93	0	0	0	0	0	0	0	0	0	0	0	0	0	0	0	0	0	0	0	1.177	1.210	1.185	1.256	1.542	1.190	0.891	0.000	0.000	0.000	0.000	0.000	0.000	0.000	0.000	0.000	0.000	0.000	0.000	0.000	0.000	120	570	7071	6846	0.235	Error	Error	3823	3248	0	0	3748	3098	0	0	0	0
2	4	11	""	"iYBR212W"	7210	15940	130	4484	3975	1658	90	95	50	100	100	0	3240	2927	1160	270	286	131	97	95	0	0	0	0	0	0	0	0	0	0	0	0	0	0	0	0	0	0	0	1.479	1.462	1.493	1.511	1.440	1.496	0.892	0.000	0.000	0.000	0.000	0.000	0.000	0.000	0.000	0.000	0.000	0.000	0.000	0.000	0.000	120	513	7364	6542	0.565	Error	Error	4394	2970	0	0	3885	2657	0	0	0	0
2	5	11	""	"iYBR216C"	7390	15930	130	2074	1964	850	88	93	58	100	100	0	3007	2822	1197	266	283	149	99	96	0	0	0	0	0	0	0	0	0	0	0	0	0	0	0	0	0	0	0	0.725	0.734	0.718	0.747	1.417	0.701	0.891	0.000	0.000	0.000	0.000	0.000	0.000	0.000	0.000	0.000	0.000	0.000	0.000	0.000	0.000	120	521	4727	4432	-0.465	Error	Error	1986	2741	0	0	1876	2556	0	0	0	0
2	6	11	""	"iYBR237W"	7590	15930	130	2772	2565	1092	87	105	187	97	97	0	12791	11519	4794	270	301	380	98	95	0	0	0	0	0	0	0	0	0	0	0	0	0	0	0	0	0	0	0	0.214	0.220	0.218	0.222	1.401	0.213	0.911	0.000	0.000	0.000	0.000	0.000	0.000	0.000	0.000	0.000	0.000	0.000	0.000	0.000	0.000	120	545	15206	13727	-2.221	Error	Error	2685	12521	0	0	2478	11249	0	0	0	0
2	7	11	""	"iYBR241C"	7790	15940	130	3998	3667	1098	94	112	122	100	100	0	3790	3688	1102	289	311	166	100	100	0	0	0	0	0	0	0	0	0	0	0	0	0	0	0	0	0	0	0	1.115	1.051	1.045	1.052	1.329	1.028	0.898	0.000	0.000	0.000	0.000	0.000	0.000	0.000	0.000	0.000	0.000	0.000	0.000	0.000	0.000	120	501	7405	6972	0.157	Error	Error	3904	3501	0	0	3573	3399	0	0	0	0
2	8	11	""	"iYBR246W"	7960	15940	120	2598	2396	1180	100	106	46	99	98	0	5779	5005	2559	283	303	123	93	90	0	0	0	0	0	0	0	0	0	0	0	0	0	0	0	0	0	0	0	0.455	0.486	0.492	0.539	1.977	0.457	0.908	0.000	0.000	0.000	0.000	0.000	0.000	0.000	0.000	0.000	0.000	0.000	0.000	0.000	0.000	120	416	7994	7018	-1.138	Error	Error	2498	5496	0	0	2296	4722	0	0	0	0
2	9	11	""	"iYDL140C"	8150	15930	130	1808	1765	600	101	111	103	100	98	0	1375	1295	462	277	299	156	93	91	0	0	0	0	0	0	0	0	0	0	0	0	0	0	0	0	0	0	0	1.555	1.635	1.629	1.723	1.664	1.522	0.816	0.000	0.000	0.000	0.000	0.000	0.000	0.000	0.000	0.000	0.000	0.000	0.000	0.000	0.000	120	543	2805	2682	0.637	Error	Error	1707	1098	0	0	1664	1018	0	0	0	0
2	10	11	""	"iYDL136W"	8350	15930	130	2757	2465	951	102	124	135	99	97	0	5478	4971	2003	273	300	168	97	95	0	0	0	0	0	0	0	0	0	0	0	0	0	0	0	0	0	0	0	0.510	0.503	0.509	0.537	1.540	0.470	0.880	0.000	0.000	0.000	0.000	0.000	0.000	0.000	0.000	0.000	0.000	0.000	0.000	0.000	0.000	120	543	7860	7061	-0.971	Error	Error	2655	5205	0	0	2363	4698	0	0	0	0
2	11	11	""	"iYDL133W"	8550	15950	110	2976	2575	1312	97	117	108	97	97	0	1947	1837	902	271	283	115	91	88	0	0	0	0	0	0	0	0	0	0	0	0	0	0	0	0	0	0	0	1.718	1.582	1.535	1.664	1.623	1.563	0.883	0.000	0.000	0.000	0.000	0.000	0.000	0.000	0.000	0.000	0.000	0.000	0.000	0.000	0.000	80	458	4555	4044	0.781	Error	Error	2879	1676	0	0	2478	1566	0	0	0	0
2	12	11	""	"iYDL117W"	8730	15940	130	2848	2599	889	94	102	78	100	100	0	1761	1742	630	269	278	85	98	95	0	0	0	0	0	0	0	0	0	0	0	0	0	0	0	0	0	0	0	1.846	1.701	1.704	1.782	1.452	1.682	0.884	0.000	0.000	0.000	0.000	0.000	0.000	0.000	0.000	0.000	0.000	0.000	0.000	0.000	0.000	120	554	4246	3978	0.884	Error	Error	2754	1492	0	0	2505	1473	0	0	0	0
2	13	11	""	"iYDL113C"	8920	15940	120	2831	2654	1087	86	98	102	100	97	0	2023	1913	842	272	281	83	91	89	0	0	0	0	0	0	0	0	0	0	0	0	0	0	0	0	0	0	0	1.568	1.565	1.531	1.671	1.750	1.505	0.855	0.000	0.000	0.000	0.000	0.000	0.000	0.000	0.000	0.000	0.000	0.000	0.000	0.000	0.000	120	493	4496	4209	0.649	Error	Error	2745	1751	0	0	2568	1641	0	0	0	0
2	14	11	""	"iYDL109C"	9100	15950	110	2909	3119	1296	86	146	299	98	96	0	2330	2295	992	268	317	286	95	91	0	0	0	0	0	0	0	0	0	0	0	0	0	0	0	0	0	0	0	1.369	1.496	1.499	1.609	1.635	1.403	0.875	0.000	0.000	0.000	0.000	0.000	0.000	0.000	0.000	0.000	0.000	0.000	0.000	0.000	0.000	80	456	4885	5060	0.453	Error	Error	2823	2062	0	0	3033	2027	0	0	0	0
2	15	11	""	"iYDL090C"	9300	15940	130	4206	3863	1392	88	184	433	98	95	0	3803	3553	1254	268	369	547	95	91	0	0	0	0	0	0	0	0	0	0	0	0	0	0	0	0	0	0	0	1.165	1.149	1.167	1.205	1.617	1.123	0.834	0.000	0.000	0.000	0.000	0.000	0.000	0.000	0.000	0.000	0.000	0.000	0.000	0.000	0.000	120	554	7653	7060	0.220	Error	Error	4118	3535	0	0	3775	3285	0	0	0	0
2	16	11	""	"iYDL086W"	9470	15930	130	4711	4093	1520	80	96	98	100	99	0	3217	2897	1265	275	304	410	90	85	0	0	0	0	0	0	0	0	0	0	0	0	0	0	0	0	0	0	0	1.574	1.531	1.523	1.756	1.975	1.417	0.818	0.000	0.000	0.000	0.000	0.000	0.000	0.000	0.000	0.000	0.000	0.000	0.000	0.000	0.000	120	529	7573	6635	0.655	Error	Error	4631	2942	0	0	4013	2622	0	0	0	0
2	17	11	""	"iYDL082W"	9680	15920	110	1440	1393	652	85	107	136	98	97	0	3234	3265	1533	285	318	270	96	96	0	0	0	0	0	0	0	0	0	0	0	0	0	0	0	0	0	0	0	0.459	0.439	0.440	0.441	1.552	0.407	0.873	0.000	0.000	0.000	0.000	0.000	0.000	0.000	0.000	0.000	0.000	0.000	0.000	0.000	0.000	80	487	4304	4288	-1.122	Error	Error	1355	2949	0	0	1308	2980	0	0	0	0
2	18	11	""	"iYDL065C"	9870	15940	120	1889	1734	590	83	88	41	100	100	0	2242	2173	730	274	287	109	96	96	0	0	0	0	0	0	0	0	0	0	0	0	0	0	0	0	0	0	0	0.918	0.869	0.865	0.903	1.647	0.825	0.880	0.000	0.000	0.000	0.000	0.000	0.000	0.000	0.000	0.000	0.000	0.000	0.000	0.000	0.000	120	504	3774	3550	-0.124	Error	Error	1806	1968	0	0	1651	1899	0	0	0	0
2	19	11	""	"iYDL060W"	10060	15940	120	771	725	255	81	85	36	98	96	0	966	988	405	262	274	87	93	91	0	0	0	0	0	0	0	0	0	0	0	0	0	0	0	0	0	0	0	0.980	0.887	0.907	0.926	1.615	0.787	0.760	0.000	0.000	0.000	0.000	0.000	0.000	0.000	0.000	0.000	0.000	0.000	0.000	0.000	0.000	120	463	1394	1370	-0.029	Error	Error	690	704	0	0	644	726	0	0	0	0
2	20	11	""	"iYDL056W"	10250	15940	120	1477	1380	509	84	87	37	100	100	0	7201	6855	2680	260	271	94	100	98	0	0	0	0	0	0	0	0	0	0	0	0	0	0	0	0	0	0	0	0.201	0.197	0.199	0.205	1.564	0.181	0.876	0.000	0.000	0.000	0.000	0.000	0.000	0.000	0.000	0.000	0.000	0.000	0.000	0.000	0.000	120	447	8334	7891	-2.317	Error	Error	1393	6941	0	0	1296	6595	0	0	0	0
2	21	11	""	"iYDRWdelta12"	10440	15930	130	2733	2436	942	82	87	40	100	100	0	3076	2982	1188	261	272	94	98	96	0	0	0	0	0	0	0	0	0	0	0	0	0	0	0	0	0	0	0	0.942	0.865	0.878	0.908	1.446	0.840	0.876	0.000	0.000	0.000	0.000	0.000	0.000	0.000	0.000	0.000	0.000	0.000	0.000	0.000	0.000	120	491	5466	5075	-0.087	Error	Error	2651	2815	0	0	2354	2721	0	0	0	0
2	22	11	""	"iYDR244W"	10610	15930	130	2416	2187	887	82	86	37	100	100	0	1569	1501	662	269	275	87	91	90	0	0	0	0	0	0	0	0	0	0	0	0	0	0	0	0	0	0	0	1.795	1.709	1.693	1.940	1.759	1.621	0.849	0.000	0.000	0.000	0.000	0.000	0.000	0.000	0.000	0.000	0.000	0.000	0.000	0.000	0.000	120	644	3634	3337	0.844	Error	Error	2334	1300	0	0	2105	1232	0	0	0	0
2	1	12	""	"iYDR248C"	6620	16120	130	4120	3862	1253	77	81	45	100	100	0	9267	8728	2588	242	272	311	100	99	0	0	0	0	0	0	0	0	0	0	0	0	0	0	0	0	0	0	0	0.448	0.446	0.450	0.447	1.296	0.435	0.916	0.000	0.000	0.000	0.000	0.000	0.000	0.000	0.000	0.000	0.000	0.000	0.000	0.000	0.000	120	607	13068	12271	-1.159	Error	Error	4043	9025	0	0	3785	8486	0	0	0	0
2	2	12	""	"itG(GCC)D2"	6800	16120	130	1888	1722	519	81	96	108	100	99	0	2294	2227	669	262	326	600	95	86	0	0	0	0	0	0	0	0	0	0	0	0	0	0	0	0	0	0	0	0.889	0.835	0.848	0.852	1.365	0.671	0.657	0.000	0.000	0.000	0.000	0.000	0.000	0.000	0.000	0.000	0.000	0.000	0.000	0.000	0.000	120	519	3839	3606	-0.169	Error	Error	1807	2032	0	0	1641	1965	0	0	0	0
2	3	12	""	"iYDR265W"	7000	16120	130	1969	1816	537	82	98	110	100	100	0	2470	2418	764	261	329	616	95	87	0	0	0	0	0	0	0	0	0	0	0	0	0	0	0	0	0	0	0	0.854	0.804	0.840	0.818	1.310	0.757	0.881	0.000	0.000	0.000	0.000	0.000	0.000	0.000	0.000	0.000	0.000	0.000	0.000	0.000	0.000	120	520	4096	3891	-0.227	Error	Error	1887	2209	0	0	1734	2157	0	0	0	0
2	4	12	""	"iYDR271C"	7180	16120	130	1279	1196	380	83	94	76	99	98	0	1533	1483	489	250	282	185	96	95	0	0	0	0	0	0	0	0	0	0	0	0	0	0	0	0	0	0	0	0.932	0.903	0.917	0.912	1.484	0.834	0.841	0.000	0.000	0.000	0.000	0.000	0.000	0.000	0.000	0.000	0.000	0.000	0.000	0.000	0.000	120	467	2479	2346	-0.101	Error	Error	1196	1283	0	0	1113	1233	0	0	0	0
2	5	12	""	"iYDR286C"	7370	16120	130	6288	5813	2079	85	131	329	100	98	0	4240	3933	1377	255	334	460	97	95	0	0	0	0	0	0	0	0	0	0	0	0	0	0	0	0	0	0	0	1.557	1.557	1.536	1.592	1.519	1.530	0.897	0.000	0.000	0.000	0.000	0.000	0.000	0.000	0.000	0.000	0.000	0.000	0.000	0.000	0.000	120	476	10188	9406	0.638	Error	Error	6203	3985	0	0	5728	3678	0	0	0	0
2	6	12	""	"iYDR292C"	7550	16120	130	5334	4943	1586	84	164	470	100	96	0	5791	5279	1872	254	400	853	97	90	0	0	0	0	0	0	0	0	0	0	0	0	0	0	0	0	0	0	0	0.948	0.967	0.971	1.000	1.341	0.905	0.915	0.000	0.000	0.000	0.000	0.000	0.000	0.000	0.000	0.000	0.000	0.000	0.000	0.000	0.000	120	519	10787	9884	-0.077	Error	Error	5250	5537	0	0	4859	5025	0	0	0	0
2	7	12	""	"iYDR296W"	7740	16120	130	5000	4560	1688	88	144	374	99	95	0	2922	2717	1007	269	384	781	90	78	0	0	0	0	0	0	0	0	0	0	0	0	0	0	0	0	0	0	0	1.851	1.827	1.864	1.866	1.409	1.687	0.732	0.000	0.000	0.000	0.000	0.000	0.000	0.000	0.000	0.000	0.000	0.000	0.000	0.000	0.000	120	508	7565	6920	0.889	Error	Error	4912	2653	0	0	4472	2448	0	0	0	0
2	8	12	""	"iYDR311W"	7950	16110	150	109	138	86	91	103	100	17	7	0	291	335	179	274	297	167	14	7	0	0	0	0	0	0	0	0	0	0	0	0	0	0	0	0	0	0	0	1.059	0.770	0.506	0.491	3.539	0.515	0.608	0.000	0.000	0.000	0.000	0.000	0.000	0.000	0.000	0.000	0.000	0.000	0.000	0.000	0.000	156	512	35	108	0.082	Error	Error	18	17	0	0	47	61	0	0	-50	0
2	9	12	""	"iYDR315C"	8120	16120	130	1655	1508	542	92	107	112	99	97	0	1217	1158	409	278	296	155	95	90	0	0	0	0	0	0	0	0	0	0	0	0	0	0	0	0	0	0	0	1.665	1.609	1.600	1.584	1.429	1.530	0.854	0.000	0.000	0.000	0.000	0.000	0.000	0.000	0.000	0.000	0.000	0.000	0.000	0.000	0.000	120	449	2502	2296	0.735	Error	Error	1563	939	0	0	1416	880	0	0	0	0
2	10	12	""	"iYDR317W"	8330	16110	150	130	142	77	96	115	117	15	3	0	308	360	185	278	302	171	21	8	0	0	0	0	0	0	0	0	0	0	0	0	0	0	0	0	0	0	0	1.133	0.561	0.481	0.529	3.272	0.380	0.392	0.000	0.000	0.000	0.000	0.000	0.000	0.000	0.000	0.000	0.000	0.000	0.000	0.000	0.000	156	572	64	128	0.181	Error	Error	34	30	0	0	46	82	0	0	-50	0
2	11	12	""	"itK(CUU)E1"	8500	16120	120	714	666	242	95	103	51	98	97	0	1906	1793	619	268	288	131	99	96	0	0	0	0	0	0	0	0	0	0	0	0	0	0	0	0	0	0	0	0.378	0.374	0.370	0.377	1.730	0.334	0.803	0.000	0.000	0.000	0.000	0.000	0.000	0.000	0.000	0.000	0.000	0.000	0.000	0.000	0.000	120	442	2257	2096	-1.404	Error	Error	619	1638	0	0	571	1525	0	0	0	0
2	12	12	""	"iYELWdelta6"	8700	16120	120	824	801	341	95	101	44	99	95	0	2656	2506	980	269	289	123	96	95	0	0	0	0	0	0	0	0	0	0	0	0	0	0	0	0	0	0	0	0.305	0.316	0.308	0.320	1.732	0.301	0.851	0.000	0.000	0.000	0.000	0.000	0.000	0.000	0.000	0.000	0.000	0.000	0.000	0.000	0.000	120	480	3116	2943	-1.711	Error	Error	729	2387	0	0	706	2237	0	0	0	0
2	13	12	""	"iYEL007W"	8900	16120	130	2863	2910	1394	87	92	42	100	100	0	9448	8757	3818	274	285	90	100	100	0	0	0	0	0	0	0	0	0	0	0	0	0	0	0	0	0	0	0	0.303	0.333	0.334	0.335	1.468	0.325	0.906	0.000	0.000	0.000	0.000	0.000	0.000	0.000	0.000	0.000	0.000	0.000	0.000	0.000	0.000	120	508	11950	11306	-1.725	Error	Error	2776	9174	0	0	2823	8483	0	0	0	0
2	14	12	""	"isnR14"	9080	16120	120	2092	2048	991	83	163	440	86	81	0	4936	4605	2300	266	310	288	92	91	0	0	0	0	0	0	0	0	0	0	0	0	0	0	0	0	0	0	0	0.430	0.453	0.448	0.455	1.462	0.422	0.843	0.000	0.000	0.000	0.000	0.000	0.000	0.000	0.000	0.000	0.000	0.000	0.000	0.000	0.000	120	485	6679	6304	-1.217	Error	Error	2009	4670	0	0	1965	4339	0	0	0	0
2	15	12	""	"iYER010C-1"	9270	16130	110	4865	4387	2230	86	212	509	96	87	0	3607	3378	1584	267	347	370	95	90	0	0	0	0	0	0	0	0	0	0	0	0	0	0	0	0	0	0	0	1.431	1.383	1.392	1.391	1.382	1.372	0.911	0.000	0.000	0.000	0.000	0.000	0.000	0.000	0.000	0.000	0.000	0.000	0.000	0.000	0.000	80	468	8119	7412	0.517	Error	Error	4779	3340	0	0	4301	3111	0	0	0	0
2	16	12	""	"iYER012W"	9450	16110	130	2719	2597	1081	82	107	130	100	98	0	2568	2407	1018	264	302	410	93	88	0	0	0	0	0	0	0	0	0	0	0	0	0	0	0	0	0	0	0	1.145	1.174	1.186	1.246	1.563	1.095	0.769	0.000	0.000	0.000	0.000	0.000	0.000	0.000	0.000	0.000	0.000	0.000	0.000	0.000	0.000	120	540	4941	4658	0.195	Error	Error	2637	2304	0	0	2515	2143	0	0	0	0
2	17	12	""	"iYER027C"	9650	16120	130	3996	3620	1515	81	108	147	100	99	0	2765	2658	1052	269	299	243	97	95	0	0	0	0	0	0	0	0	0	0	0	0	0	0	0	0	0	0	0	1.569	1.481	1.537	1.550	1.783	1.489	0.896	0.000	0.000	0.000	0.000	0.000	0.000	0.000	0.000	0.000	0.000	0.000	0.000	0.000	0.000	120	596	6411	5928	0.649	Error	Error	3915	2496	0	0	3539	2389	0	0	0	0
2	18	12	""	"iYER031C"	9840	16120	130	1730	1646	737	81	86	40	99	98	0	1706	1656	697	261	275	114	93	91	0	0	0	0	0	0	0	0	0	0	0	0	0	0	0	0	0	0	0	1.141	1.122	1.117	1.138	1.648	1.112	0.870	0.000	0.000	0.000	0.000	0.000	0.000	0.000	0.000	0.000	0.000	0.000	0.000	0.000	0.000	120	530	3094	2960	0.191	Error	Error	1649	1445	0	0	1565	1395	0	0	0	0
2	19	12	""	"iYER035W"	10030	16110	130	1539	1524	442	80	84	38	100	100	0	2405	2333	684	254	269	102	99	99	0	0	0	0	0	0	0	0	0	0	0	0	0	0	0	0	0	0	0	0.678	0.695	0.705	0.695	1.363	0.670	0.890	0.000	0.000	0.000	0.000	0.000	0.000	0.000	0.000	0.000	0.000	0.000	0.000	0.000	0.000	120	502	3610	3523	-0.560	Error	Error	1459	2151	0	0	1444	2079	0	0	0	0
2	20	12	""	"iYERWdelta9"	10230	16110	150	99	108	53	79	84	33	37	20	0	278	307	126	257	270	83	30	14	0	0	0	0	0	0	0	0	0	0	0	0	0	0	0	0	0	0	0	0.952	0.580	0.526	0.534	3.466	0.137	0.080	0.000	0.000	0.000	0.000	0.000	0.000	0.000	0.000	0.000	0.000	0.000	0.000	0.000	0.000	156	545	41	79	-0.070	Error	Error	20	21	0	0	29	50	0	0	-50	0
2	21	12	""	"iYER050C"	10420	16120	150	99	113	59	80	85	37	37	17	0	297	319	138	260	270	94	30	16	0	0	0	0	0	0	0	0	0	0	0	0	0	0	0	0	0	0	0	0.514	0.559	0.383	0.389	4.808	0.176	0.116	0.000	0.000	0.000	0.000	0.000	0.000	0.000	0.000	0.000	0.000	0.000	0.000	0.000	0.000	156	589	56	92	-0.962	Error	Error	19	37	0	0	33	59	0	0	-50	0
2	22	12	""	"iYER053C-1"	10610	16130	80	127	141	58	77	81	31	63	44	0	334	355	148	252	261	83	50	36	0	0	0	0	0	0	0	0	0	0	0	0	0	0	0	0	0	0	0	0.610	0.621	0.516	0.445	2.640	0.229	0.185	0.000	0.000	0.000	0.000	0.000	0.000	0.000	0.000	0.000	0.000	0.000	0.000	0.000	0.000	52	313	132	167	-0.714	Error	Error	50	82	0	0	64	103	0	0	0	0
2	1	13	""	"iYFR048W"	6610	16300	130	3296	3025	1004	79	89	109	100	98	0	9489	8831	2995	246	321	658	98	98	0	0	0	0	0	0	0	0	0	0	0	0	0	0	0	0	0	0	0	0.348	0.343	0.352	0.343	1.280	0.321	0.929	0.000	0.000	0.000	0.000	0.000	0.000	0.000	0.000	0.000	0.000	0.000	0.000	0.000	0.000	120	619	12460	11531	-1.523	Error	Error	3217	9243	0	0	2946	8585	0	0	0	0
2	2	13	""	"iYFR052W"	6800	16300	130	1585	1463	523	81	100	138	97	95	0	2411	2338	848	259	387	893	89	70	0	0	0	0	0	0	0	0	0	0	0	0	0	0	0	0	0	0	0	0.699	0.665	0.670	0.685	1.440	0.502	0.721	0.000	0.000	0.000	0.000	0.000	0.000	0.000	0.000	0.000	0.000	0.000	0.000	0.000	0.000	120	525	3656	3461	-0.517	Error	Error	1504	2152	0	0	1382	2079	0	0	0	0
2	3	13	""	"iYFR054C-0"	6990	16300	130	5321	5335	2380	81	93	84	100	100	0	6875	6655	2812	253	328	621	95	93	0	0	0	0	0	0	0	0	0	0	0	0	0	0	0	0	0	0	0	0.791	0.821	0.818	0.846	1.339	0.804	0.914	0.000	0.000	0.000	0.000	0.000	0.000	0.000	0.000	0.000	0.000	0.000	0.000	0.000	0.000	120	518	11862	11656	-0.338	Error	Error	5240	6622	0	0	5254	6402	0	0	0	0
2	4	13	""	"iYGL257C"	7190	16300	140	5854	5351	1883	82	97	84	99	99	0	3507	3274	1190	244	298	342	92	91	0	0	0	0	0	0	0	0	0	0	0	0	0	0	0	0	0	0	0	1.769	1.739	1.731	1.790	1.464	1.751	0.868	0.000	0.000	0.000	0.000	0.000	0.000	0.000	0.000	0.000	0.000	0.000	0.000	0.000	0.000	156	513	9035	8299	0.823	Error	Error	5772	3263	0	0	5269	3030	0	0	0	0
2	5	13	""	"iYGL256W-3"	7370	16300	130	5325	5125	1888	84	121	257	100	99	0	3321	3158	1130	246	306	390	96	93	0	0	0	0	0	0	0	0	0	0	0	0	0	0	0	0	0	0	0	1.704	1.731	1.770	1.771	1.410	1.750	0.879	0.000	0.000	0.000	0.000	0.000	0.000	0.000	0.000	0.000	0.000	0.000	0.000	0.000	0.000	120	516	8316	7953	0.769	Error	Error	5241	3075	0	0	5041	2912	0	0	0	0
2	6	13	""	"iYGL252C"	7580	16310	130	5442	5179	2137	85	126	285	98	95	0	4072	3835	1537	252	338	593	94	89	0	0	0	0	0	0	0	0	0	0	0	0	0	0	0	0	0	0	0	1.402	1.422	1.432	1.440	1.377	1.406	0.899	0.000	0.000	0.000	0.000	0.000	0.000	0.000	0.000	0.000	0.000	0.000	0.000	0.000	0.000	120	552	9177	8677	0.488	Error	Error	5357	3820	0	0	5094	3583	0	0	0	0
2	7	13	""	"iYGL233W"	7760	16300	130	955	877	328	87	100	88	94	91	0	1461	1412	547	267	293	181	90	87	0	0	0	0	0	0	0	0	0	0	0	0	0	0	0	0	0	0	0	0.727	0.690	0.666	0.736	1.686	0.623	0.806	0.000	0.000	0.000	0.000	0.000	0.000	0.000	0.000	0.000	0.000	0.000	0.000	0.000	0.000	120	549	2062	1935	-0.460	Error	Error	868	1194	0	0	790	1145	0	0	0	0
2	8	13	""	"iYGL228W"	7960	16300	130	5034	4696	2046	87	94	42	100	99	0	4960	4667	1924	270	287	114	97	96	0	0	0	0	0	0	0	0	0	0	0	0	0	0	0	0	0	0	0	1.055	1.048	1.051	1.062	1.432	1.062	0.898	0.000	0.000	0.000	0.000	0.000	0.000	0.000	0.000	0.000	0.000	0.000	0.000	0.000	0.000	120	517	9637	9006	0.077	Error	Error	4947	4690	0	0	4609	4397	0	0	0	0
2	9	13	""	"itV(AAC)G3-0"	8150	16310	140	7730	7069	2406	86	96	70	99	99	0	5442	5069	1728	270	289	133	99	98	0	0	0	0	0	0	0	0	0	0	0	0	0	0	0	0	0	0	0	1.478	1.455	1.474	1.501	1.339	1.435	0.937	0.000	0.000	0.000	0.000	0.000	0.000	0.000	0.000	0.000	0.000	0.000	0.000	0.000	0.000	156	564	12816	11782	0.564	Error	Error	7644	5172	0	0	6983	4799	0	0	0	0
2	10	13	""	"iYGL208W"	8340	16300	130	4273	4033	1390	85	91	39	100	99	0	2839	2728	959	262	270	92	99	96	0	0	0	0	0	0	0	0	0	0	0	0	0	0	0	0	0	0	0	1.625	1.601	1.604	1.644	1.419	1.593	0.897	0.000	0.000	0.000	0.000	0.000	0.000	0.000	0.000	0.000	0.000	0.000	0.000	0.000	0.000	120	503	6765	6414	0.701	Error	Error	4188	2577	0	0	3948	2466	0	0	0	0
2	11	13	""	"itH(GUG)G1"	8530	16310	130	1458	1360	496	92	108	107	95	95	0	2430	2350	917	257	286	151	95	94	0	0	0	0	0	0	0	0	0	0	0	0	0	0	0	0	0	0	0	0.629	0.606	0.603	0.635	1.461	0.580	0.902	0.000	0.000	0.000	0.000	0.000	0.000	0.000	0.000	0.000	0.000	0.000	0.000	0.000	0.000	120	560	3539	3361	-0.670	Error	Error	1366	2173	0	0	1268	2093	0	0	0	0
2	12	13	""	"itK(UUU)G1"	8720	16310	140	3538	3162	1236	88	92	39	100	100	0	3173	2992	1125	260	270	91	98	96	0	0	0	0	0	0	0	0	0	0	0	0	0	0	0	0	0	0	0	1.184	1.125	1.142	1.171	1.551	1.128	0.901	0.000	0.000	0.000	0.000	0.000	0.000	0.000	0.000	0.000	0.000	0.000	0.000	0.000	0.000	156	580	6363	5806	0.244	Error	Error	3450	2913	0	0	3074	2732	0	0	0	0
2	13	13	""	"iYGR091W"	8910	16310	120	1943	1924	892	87	93	43	98	96	0	1533	1474	615	266	275	88	95	93	0	0	0	0	0	0	0	0	0	0	0	0	0	0	0	0	0	0	0	1.465	1.521	1.564	1.585	1.564	1.502	0.863	0.000	0.000	0.000	0.000	0.000	0.000	0.000	0.000	0.000	0.000	0.000	0.000	0.000	0.000	120	493	3123	3045	0.551	Error	Error	1856	1267	0	0	1837	1208	0	0	0	0
2	14	13	""	"iYGR095C"	9110	16310	130	1199	1074	446	86	132	262	89	81	0	1827	1666	681	266	292	166	91	88	0	0	0	0	0	0	0	0	0	0	0	0	0	0	0	0	0	0	0	0.713	0.706	0.679	0.713	1.802	0.721	0.773	0.000	0.000	0.000	0.000	0.000	0.000	0.000	0.000	0.000	0.000	0.000	0.000	0.000	0.000	120	573	2674	2388	-0.488	Error	Error	1113	1561	0	0	988	1400	0	0	0	0
2	15	13	""	"iYGR099W"	9300	16320	110	3548	2974	1429	85	144	298	93	90	0	2234	2039	885	261	293	184	90	88	0	0	0	0	0	0	0	0	0	0	0	0	0	0	0	0	0	0	0	1.755	1.625	1.594	1.662	1.531	1.637	0.874	0.000	0.000	0.000	0.000	0.000	0.000	0.000	0.000	0.000	0.000	0.000	0.000	0.000	0.000	80	436	5436	4667	0.812	Error	Error	3463	1973	0	0	2889	1778	0	0	0	0
2	16	13	""	"iYGR111W"	9480	16310	130	2910	2608	999	82	93	57	100	99	0	1975	1827	726	260	270	87	95	93	0	0	0	0	0	0	0	0	0	0	0	0	0	0	0	0	0	0	0	1.649	1.612	1.551	1.685	1.877	1.568	0.861	0.000	0.000	0.000	0.000	0.000	0.000	0.000	0.000	0.000	0.000	0.000	0.000	0.000	0.000	120	545	4543	4093	0.722	Error	Error	2828	1715	0	0	2526	1567	0	0	0	0
2	17	13	""	"iYGR117C"	9670	16310	120	3365	3189	1608	81	98	109	98	95	0	3594	3326	1669	264	275	99	94	93	0	0	0	0	0	0	0	0	0	0	0	0	0	0	0	0	0	0	0	0.986	1.015	1.013	1.051	1.516	0.980	0.904	0.000	0.000	0.000	0.000	0.000	0.000	0.000	0.000	0.000	0.000	0.000	0.000	0.000	0.000	120	510	6614	6170	-0.020	Error	Error	3284	3330	0	0	3108	3062	0	0	0	0
2	18	13	""	"itN(GUU)G"	9860	16310	120	1161	1064	416	81	89	45	96	95	0	1093	1032	410	259	273	107	93	90	0	0	0	0	0	0	0	0	0	0	0	0	0	0	0	0	0	0	0	1.295	1.272	1.242	1.249	1.648	1.205	0.822	0.000	0.000	0.000	0.000	0.000	0.000	0.000	0.000	0.000	0.000	0.000	0.000	0.000	0.000	120	483	1914	1756	0.373	Error	Error	1080	834	0	0	983	773	0	0	0	0
2	19	13	""	"iYGR133W"	10050	16310	130	2994	2881	1273	82	89	48	99	99	0	1710	1638	693	261	279	110	94	92	0	0	0	0	0	0	0	0	0	0	0	0	0	0	0	0	0	0	0	2.010	2.033	2.026	2.151	1.648	2.041	0.864	0.000	0.000	0.000	0.000	0.000	0.000	0.000	0.000	0.000	0.000	0.000	0.000	0.000	0.000	120	552	4361	4176	1.007	Error	Error	2912	1449	0	0	2799	1377	0	0	0	0
2	20	13	""	"iYGR138C"	10240	16310	120	934	823	355	82	86	35	98	95	0	884	909	420	269	278	90	88	86	0	0	0	0	0	0	0	0	0	0	0	0	0	0	0	0	0	0	0	1.385	1.158	1.220	1.281	1.945	1.031	0.769	0.000	0.000	0.000	0.000	0.000	0.000	0.000	0.000	0.000	0.000	0.000	0.000	0.000	0.000	120	494	1467	1381	0.470	Error	Error	852	615	0	0	741	640	0	0	0	0
2	21	13	""	"iYGR142W"	10430	16310	120	2264	2172	1133	79	84	38	100	99	0	3089	2758	1444	259	272	96	93	90	0	0	0	0	0	0	0	0	0	0	0	0	0	0	0	0	0	0	0	0.772	0.838	0.853	0.867	1.531	0.804	0.903	0.000	0.000	0.000	0.000	0.000	0.000	0.000	0.000	0.000	0.000	0.000	0.000	0.000	0.000	120	496	5015	4592	-0.373	Error	Error	2185	2830	0	0	2093	2499	0	0	0	0
2	22	13	""	"iYGR154C"	10630	16310	130	3811	3639	1838	81	86	37	100	100	0	2388	2232	1043	256	268	93	93	93	0	0	0	0	0	0	0	0	0	0	0	0	0	0	0	0	0	0	0	1.750	1.801	1.794	1.928	1.704	1.809	0.884	0.000	0.000	0.000	0.000	0.000	0.000	0.000	0.000	0.000	0.000	0.000	0.000	0.000	0.000	120	682	5862	5534	0.807	Error	Error	3730	2132	0	0	3558	1976	0	0	0	0
2	1	14	""	"iYGR158C"	6640	16500	140	2471	2104	940	79	91	102	98	94	0	4243	3775	1642	250	303	559	91	87	0	0	0	0	0	0	0	0	0	0	0	0	0	0	0	0	0	0	0	0.599	0.574	0.572	0.559	1.475	0.566	0.931	0.000	0.000	0.000	0.000	0.000	0.000	0.000	0.000	0.000	0.000	0.000	0.000	0.000	0.000	156	712	6385	5550	-0.739	Error	Error	2392	3993	0	0	2025	3525	0	0	0	0
2	2	14	""	"iYGRCdelta30"	6830	16500	130	1719	1579	642	79	85	39	99	99	0	2359	2247	870	253	263	92	98	95	0	0	0	0	0	0	0	0	0	0	0	0	0	0	0	0	0	0	0	0.779	0.752	0.787	0.784	1.576	0.734	0.873	0.000	0.000	0.000	0.000	0.000	0.000	0.000	0.000	0.000	0.000	0.000	0.000	0.000	0.000	120	512	3746	3494	-0.361	Error	Error	1640	2106	0	0	1500	1994	0	0	0	0
2	3	14	""	"iYHR094C"	7020	16500	140	3227	3102	1403	80	88	48	100	98	0	2374	2240	991	253	275	180	92	91	0	0	0	0	0	0	0	0	0	0	0	0	0	0	0	0	0	0	0	1.484	1.521	1.513	1.584	1.514	1.522	0.885	0.000	0.000	0.000	0.000	0.000	0.000	0.000	0.000	0.000	0.000	0.000	0.000	0.000	0.000	156	537	5268	5009	0.569	Error	Error	3147	2121	0	0	3022	1987	0	0	0	0
2	4	14	""	"iYHR098C"	7210	16500	140	4114	4260	2276	78	86	66	99	99	0	2425	2422	1211	242	252	75	96	92	0	0	0	0	0	0	0	0	0	0	0	0	0	0	0	0	0	0	0	1.849	1.918	1.912	1.992	1.540	1.961	0.903	0.000	0.000	0.000	0.000	0.000	0.000	0.000	0.000	0.000	0.000	0.000	0.000	0.000	0.000	156	515	6219	6362	0.887	Error	Error	4036	2183	0	0	4182	2180	0	0	0	0
2	5	14	""	"iYHR102W"	7400	16500	130	2995	3405	1942	78	90	79	100	97	0	2812	2719	1317	242	255	109	95	95	0	0	0	0	0	0	0	0	0	0	0	0	0	0	0	0	0	0	0	1.135	1.343	1.356	1.368	1.546	1.401	0.912	0.000	0.000	0.000	0.000	0.000	0.000	0.000	0.000	0.000	0.000	0.000	0.000	0.000	0.000	120	504	5487	5804	0.183	Error	Error	2917	2570	0	0	3327	2477	0	0	0	0
2	6	14	""	"iYHR119W"	7570	16500	120	2993	2693	983	87	105	105	100	99	0	2719	2483	932	256	293	176	95	93	0	0	0	0	0	0	0	0	0	0	0	0	0	0	0	0	0	0	0	1.180	1.170	1.194	1.226	1.521	1.137	0.904	0.000	0.000	0.000	0.000	0.000	0.000	0.000	0.000	0.000	0.000	0.000	0.000	0.000	0.000	120	496	5369	4833	0.239	Error	Error	2906	2463	0	0	2606	2227	0	0	0	0
2	7	14	""	"iYHR123W"	7780	16500	120	1717	1699	902	92	109	108	96	93	0	6972	6827	3811	274	309	189	95	93	0	0	0	0	0	0	0	0	0	0	0	0	0	0	0	0	0	0	0	0.243	0.245	0.244	0.270	1.627	0.225	0.906	0.000	0.000	0.000	0.000	0.000	0.000	0.000	0.000	0.000	0.000	0.000	0.000	0.000	0.000	120	521	8323	8160	-2.043	Error	Error	1625	6698	0	0	1607	6553	0	0	0	0
2	8	14	""	"iYHR127W"	7960	16500	130	1029	1083	616	86	91	44	95	92	0	2775	2764	1410	270	288	126	93	90	0	0	0	0	0	0	0	0	0	0	0	0	0	0	0	0	0	0	0	0.376	0.400	0.406	0.378	1.635	0.387	0.889	0.000	0.000	0.000	0.000	0.000	0.000	0.000	0.000	0.000	0.000	0.000	0.000	0.000	0.000	120	530	3448	3491	-1.409	Error	Error	943	2505	0	0	997	2494	0	0	0	0
2	9	14	""	"iYHR143W"	8150	16500	130	2527	2838	1601	87	93	61	99	96	0	2548	2676	1438	263	285	139	94	92	0	0	0	0	0	0	0	0	0	0	0	0	0	0	0	0	0	0	0	1.068	1.140	1.098	1.225	1.562	1.095	0.907	0.000	0.000	0.000	0.000	0.000	0.000	0.000	0.000	0.000	0.000	0.000	0.000	0.000	0.000	120	507	4725	5164	0.095	Error	Error	2440	2285	0	0	2751	2413	0	0	0	0
2	10	14	""	"iYHRCdelta11"	8350	16500	130	2223	2209	958	88	120	157	98	95	0	1874	1873	780	263	296	191	95	90	0	0	0	0	0	0	0	0	0	0	0	0	0	0	0	0	0	0	0	1.325	1.317	1.362	1.321	1.382	1.251	0.835	0.000	0.000	0.000	0.000	0.000	0.000	0.000	0.000	0.000	0.000	0.000	0.000	0.000	0.000	120	585	3746	3731	0.406	Error	Error	2135	1611	0	0	2121	1610	0	0	0	0
2	11	14	""	"iYHR149C"	8550	16510	110	1874	1752	944	88	127	178	93	86	0	1676	1626	867	250	291	196	86	86	0	0	0	0	0	0	0	0	0	0	0	0	0	0	0	0	0	0	0	1.252	1.209	1.218	1.265	1.593	1.146	0.803	0.000	0.000	0.000	0.000	0.000	0.000	0.000	0.000	0.000	0.000	0.000	0.000	0.000	0.000	80	421	3212	3040	0.325	Error	Error	1786	1426	0	0	1664	1376	0	0	0	0
2	12	14	""	"iYHR164C"	8720	16500	130	3189	2868	1171	82	87	40	100	99	0	2859	2601	1019	249	256	88	95	93	0	0	0	0	0	0	0	0	0	0	0	0	0	0	0	0	0	0	0	1.190	1.185	1.186	1.241	1.564	1.182	0.898	0.000	0.000	0.000	0.000	0.000	0.000	0.000	0.000	0.000	0.000	0.000	0.000	0.000	0.000	120	505	5717	5138	0.251	Error	Error	3107	2610	0	0	2786	2352	0	0	0	0
2	13	14	""	"iYHR168W"	8920	16500	130	2191	2041	751	83	91	47	99	98	0	1532	1476	566	253	265	116	93	89	0	0	0	0	0	0	0	0	0	0	0	0	0	0	0	0	0	0	0	1.648	1.601	1.611	1.667	1.513	1.561	0.845	0.000	0.000	0.000	0.000	0.000	0.000	0.000	0.000	0.000	0.000	0.000	0.000	0.000	0.000	120	526	3387	3181	0.721	Error	Error	2108	1279	0	0	1958	1223	0	0	0	0
2	14	14	""	"iYHR173C"	9100	16500	130	1052	1019	414	85	91	38	97	96	0	1136	1074	429	258	267	86	91	90	0	0	0	0	0	0	0	0	0	0	0	0	0	0	0	0	0	0	0	1.101	1.145	1.165	1.151	1.473	1.060	0.815	0.000	0.000	0.000	0.000	0.000	0.000	0.000	0.000	0.000	0.000	0.000	0.000	0.000	0.000	120	513	1845	1750	0.139	Error	Error	967	878	0	0	934	816	0	0	0	0
2	15	14	""	"itT(AGU)J"	9290	16490	130	1618	1799	1006	84	98	125	97	91	0	1921	2004	1059	261	270	89	95	94	0	0	0	0	0	0	0	0	0	0	0	0	0	0	0	0	0	0	0	0.924	0.984	1.009	1.008	1.598	0.961	0.873	0.000	0.000	0.000	0.000	0.000	0.000	0.000	0.000	0.000	0.000	0.000	0.000	0.000	0.000	120	520	3194	3458	-0.114	Error	Error	1534	1660	0	0	1715	1743	0	0	0	0
2	16	14	""	"iYJL197W"	9490	16500	140	2407	2237	1012	82	101	115	96	95	0	3147	2916	1322	254	271	150	94	92	0	0	0	0	0	0	0	0	0	0	0	0	0	0	0	0	0	0	0	0.804	0.810	0.809	0.856	1.634	0.788	0.912	0.000	0.000	0.000	0.000	0.000	0.000	0.000	0.000	0.000	0.000	0.000	0.000	0.000	0.000	156	553	5218	4817	-0.315	Error	Error	2325	2893	0	0	2155	2662	0	0	0	0
2	17	14	""	"iYJL192C"	9690	16510	130	2133	1921	869	78	98	121	98	93	0	1838	1719	696	254	268	116	94	91	0	0	0	0	0	0	0	0	0	0	0	0	0	0	0	0	0	0	0	1.297	1.258	1.236	1.294	1.666	1.243	0.856	0.000	0.000	0.000	0.000	0.000	0.000	0.000	0.000	0.000	0.000	0.000	0.000	0.000	0.000	120	454	3639	3308	0.376	Error	Error	2055	1584	0	0	1843	1465	0	0	0	0
2	18	14	""	"iYJL173C"	9870	16500	140	4769	4503	1820	83	87	39	100	100	0	4647	4386	1674	265	271	86	98	98	0	0	0	0	0	0	0	0	0	0	0	0	0	0	0	0	0	0	0	1.069	1.073	1.060	1.082	1.470	1.079	0.912	0.000	0.000	0.000	0.000	0.000	0.000	0.000	0.000	0.000	0.000	0.000	0.000	0.000	0.000	156	517	9068	8541	0.097	Error	Error	4686	4382	0	0	4420	4121	0	0	0	0
2	19	14	""	"iYJL168C"	10060	16500	120	4135	3783	1531	85	101	116	100	98	0	2733	2526	1071	270	287	142	91	88	0	0	0	0	0	0	0	0	0	0	0	0	0	0	0	0	0	0	0	1.644	1.639	1.651	1.763	1.635	1.589	0.892	0.000	0.000	0.000	0.000	0.000	0.000	0.000	0.000	0.000	0.000	0.000	0.000	0.000	0.000	120	468	6513	5954	0.718	Error	Error	4050	2463	0	0	3698	2256	0	0	0	0
2	20	14	""	"iYJL164C"	10250	16500	130	3082	3441	2153	85	101	112	97	95	0	2209	2358	1343	269	294	195	90	85	0	0	0	0	0	0	0	0	0	0	0	0	0	0	0	0	0	0	0	1.545	1.607	1.582	1.644	1.571	1.608	0.913	0.000	0.000	0.000	0.000	0.000	0.000	0.000	0.000	0.000	0.000	0.000	0.000	0.000	0.000	120	516	4937	5445	0.627	Error	Error	2997	1940	0	0	3356	2089	0	0	0	0
2	21	14	""	"isnR128"	10440	16500	120	743	711	286	82	87	42	97	95	0	1069	994	414	264	271	93	90	88	0	0	0	0	0	0	0	0	0	0	0	0	0	0	0	0	0	0	0	0.821	0.862	0.871	0.892	1.553	0.764	0.819	0.000	0.000	0.000	0.000	0.000	0.000	0.000	0.000	0.000	0.000	0.000	0.000	0.000	0.000	120	472	1466	1359	-0.284	Error	Error	661	805	0	0	629	730	0	0	0	0
2	22	14	""	"iYJL146W"	10620	16500	120	2888	2842	1439	84	89	43	100	100	0	2414	2309	1187	267	272	87	93	90	0	0	0	0	0	0	0	0	0	0	0	0	0	0	0	0	0	0	0	1.306	1.351	1.343	1.542	1.964	1.299	0.900	0.000	0.000	0.000	0.000	0.000	0.000	0.000	0.000	0.000	0.000	0.000	0.000	0.000	0.000	120	570	4951	4800	0.385	Error	Error	2804	2147	0	0	2758	2042	0	0	0	0
2	1	15	""	"iYJL141C"	6620	16690	130	3064	3179	1582	83	99	91	98	96	0	2805	2828	1403	261	272	114	92	92	0	0	0	0	0	0	0	0	0	0	0	0	0	0	0	0	0	0	0	1.172	1.206	1.180	1.217	1.473	1.148	0.902	0.000	0.000	0.000	0.000	0.000	0.000	0.000	0.000	0.000	0.000	0.000	0.000	0.000	0.000	120	632	5525	5663	0.229	Error	Error	2981	2544	0	0	3096	2567	0	0	0	0
2	2	15	""	"iYJL125C"	6810	16690	130	2524	2449	976	81	96	77	97	95	0	2069	1903	778	246	271	141	95	90	0	0	0	0	0	0	0	0	0	0	0	0	0	0	0	0	0	0	0	1.340	1.429	1.412	1.498	1.561	1.397	0.885	0.000	0.000	0.000	0.000	0.000	0.000	0.000	0.000	0.000	0.000	0.000	0.000	0.000	0.000	120	497	4266	4025	0.422	Error	Error	2443	1823	0	0	2368	1657	0	0	0	0
2	3	15	""	"iYJL120W"	7000	16690	130	1227	1197	535	84	95	71	96	93	0	1029	1020	368	256	276	158	93	88	0	0	0	0	0	0	0	0	0	0	0	0	0	0	0	0	0	0	0	1.479	1.457	1.440	1.377	1.621	1.428	0.802	0.000	0.000	0.000	0.000	0.000	0.000	0.000	0.000	0.000	0.000	0.000	0.000	0.000	0.000	120	462	1916	1877	0.564	Error	Error	1143	773	0	0	1113	764	0	0	0	0
2	4	15	""	"iYJL115W"	7190	16690	140	1860	1650	708	80	90	71	98	95	0	2515	2328	1046	246	257	79	91	91	0	0	0	0	0	0	0	0	0	0	0	0	0	0	0	0	0	0	0	0.784	0.754	0.739	0.822	1.985	0.719	0.878	0.000	0.000	0.000	0.000	0.000	0.000	0.000	0.000	0.000	0.000	0.000	0.000	0.000	0.000	156	493	4049	3652	-0.350	Error	Error	1780	2269	0	0	1570	2082	0	0	0	0
2	5	15	""	"iYKL211C"	7390	16690	130	3302	3225	1437	77	85	67	100	100	0	2325	2183	941	238	249	82	93	91	0	0	0	0	0	0	0	0	0	0	0	0	0	0	0	0	0	0	0	1.545	1.619	1.650	1.761	1.768	1.594	0.858	0.000	0.000	0.000	0.000	0.000	0.000	0.000	0.000	0.000	0.000	0.000	0.000	0.000	0.000	120	490	5312	5093	0.628	Error	Error	3225	2087	0	0	3148	1945	0	0	0	0
2	6	15	""	"itT(CGU)K"	7570	16690	130	2338	2281	801	81	100	103	100	100	0	1510	1421	542	251	271	125	95	93	0	0	0	0	0	0	0	0	0	0	0	0	0	0	0	0	0	0	0	1.793	1.880	1.936	1.993	1.403	1.792	0.869	0.000	0.000	0.000	0.000	0.000	0.000	0.000	0.000	0.000	0.000	0.000	0.000	0.000	0.000	120	511	3516	3370	0.842	Error	Error	2257	1259	0	0	2200	1170	0	0	0	0
2	7	15	""	"iYKL205W"	7770	16690	130	2553	2353	799	87	111	179	100	100	0	2927	2799	1059	258	281	173	99	96	0	0	0	0	0	0	0	0	0	0	0	0	0	0	0	0	0	0	0	0.924	0.892	0.926	0.943	1.467	0.852	0.890	0.000	0.000	0.000	0.000	0.000	0.000	0.000	0.000	0.000	0.000	0.000	0.000	0.000	0.000	120	518	5135	4807	-0.114	Error	Error	2466	2669	0	0	2266	2541	0	0	0	0
2	8	15	""	"iYKLCdelta2"	7940	16690	120	789	728	277	85	93	75	93	91	0	1216	1139	421	251	266	101	91	90	0	0	0	0	0	0	0	0	0	0	0	0	0	0	0	0	0	0	0	0.730	0.724	0.687	0.700	1.635	0.673	0.824	0.000	0.000	0.000	0.000	0.000	0.000	0.000	0.000	0.000	0.000	0.000	0.000	0.000	0.000	120	462	1669	1531	-0.455	Error	Error	704	965	0	0	643	888	0	0	0	0
2	9	15	""	"iYKL187C"	8130	16680	130	1932	2176	1192	83	92	65	100	100	0	1580	1690	828	252	273	127	95	93	0	0	0	0	0	0	0	0	0	0	0	0	0	0	0	0	0	0	0	1.392	1.455	1.440	1.513	1.545	1.516	0.803	0.000	0.000	0.000	0.000	0.000	0.000	0.000	0.000	0.000	0.000	0.000	0.000	0.000	0.000	120	520	3177	3531	0.477	Error	Error	1849	1328	0	0	2093	1438	0	0	0	0
2	10	15	""	"iYKL183W"	8310	16680	130	2609	2751	1251	82	94	63	100	100	0	1849	1814	741	250	268	124	95	93	0	0	0	0	0	0	0	0	0	0	0	0	0	0	0	0	0	0	0	1.580	1.707	1.755	1.753	1.552	1.716	0.878	0.000	0.000	0.000	0.000	0.000	0.000	0.000	0.000	0.000	0.000	0.000	0.000	0.000	0.000	120	515	4126	4233	0.660	Error	Error	2527	1599	0	0	2669	1564	0	0	0	0
2	11	15	""	"iYKL166C-1"	8510	16680	130	2340	2424	1169	82	105	128	97	95	0	2397	2292	1070	246	270	144	92	91	0	0	0	0	0	0	0	0	0	0	0	0	0	0	0	0	0	0	0	1.050	1.145	1.152	1.167	1.377	1.109	0.885	0.000	0.000	0.000	0.000	0.000	0.000	0.000	0.000	0.000	0.000	0.000	0.000	0.000	0.000	120	527	4409	4388	0.070	Error	Error	2258	2151	0	0	2342	2046	0	0	0	0
2	12	15	""	"iYKL164C-1"	8690	16680	130	2834	2719	1089	82	88	48	100	100	0	2093	2021	809	246	260	100	97	94	0	0	0	0	0	0	0	0	0	0	0	0	0	0	0	0	0	0	0	1.490	1.486	1.531	1.575	1.616	1.497	0.870	0.000	0.000	0.000	0.000	0.000	0.000	0.000	0.000	0.000	0.000	0.000	0.000	0.000	0.000	120	485	4599	4412	0.575	Error	Error	2752	1847	0	0	2637	1775	0	0	0	0
2	13	15	""	"iYKL162C"	8880	16680	130	3808	3737	1544	82	97	95	98	97	0	3100	3034	1303	249	271	195	93	93	0	0	0	0	0	0	0	0	0	0	0	0	0	0	0	0	0	0	0	1.307	1.312	1.340	1.369	1.484	1.262	0.887	0.000	0.000	0.000	0.000	0.000	0.000	0.000	0.000	0.000	0.000	0.000	0.000	0.000	0.000	120	533	6577	6440	0.386	Error	Error	3726	2851	0	0	3655	2785	0	0	0	0
2	14	15	""	"iYKL148C"	9080	16690	130	1801	1879	816	81	95	90	99	96	0	1464	1447	577	251	274	195	93	88	0	0	0	0	0	0	0	0	0	0	0	0	0	0	0	0	0	0	0	1.418	1.503	1.475	1.539	1.529	1.443	0.798	0.000	0.000	0.000	0.000	0.000	0.000	0.000	0.000	0.000	0.000	0.000	0.000	0.000	0.000	120	530	2933	2994	0.504	Error	Error	1720	1213	0	0	1798	1196	0	0	0	0
2	15	15	""	"iYKL143W"	9260	16680	130	2132	1981	662	82	90	44	98	96	0	1506	1491	537	256	268	101	94	92	0	0	0	0	0	0	0	0	0	0	0	0	0	0	0	0	0	0	0	1.640	1.538	1.541	1.581	1.719	1.528	0.852	0.000	0.000	0.000	0.000	0.000	0.000	0.000	0.000	0.000	0.000	0.000	0.000	0.000	0.000	120	525	3300	3134	0.714	Error	Error	2050	1250	0	0	1899	1235	0	0	0	0
2	16	15	""	"iYKL139W"	9450	16680	130	2320	2715	1515	83	90	41	100	98	0	13872	14894	8293	246	266	156	99	97	0	0	0	0	0	0	0	0	0	0	0	0	0	0	0	0	0	0	0	0.164	0.180	0.176	0.191	1.549	0.173	0.920	0.000	0.000	0.000	0.000	0.000	0.000	0.000	0.000	0.000	0.000	0.000	0.000	0.000	0.000	120	512	15863	17280	-2.607	Error	Error	2237	13626	0	0	2632	14648	0	0	0	0
2	17	15	""	"iYLL025W"	9640	16680	130	2426	2382	870	85	95	67	100	100	0	6394	6306	2287	253	290	320	98	97	0	0	0	0	0	0	0	0	0	0	0	0	0	0	0	0	0	0	0	0.381	0.379	0.390	0.391	1.542	0.355	0.897	0.000	0.000	0.000	0.000	0.000	0.000	0.000	0.000	0.000	0.000	0.000	0.000	0.000	0.000	120	483	8482	8350	-1.391	Error	Error	2341	6141	0	0	2297	6053	0	0	0	0
2	18	15	""	"iYLL021W"	9830	16680	130	458	495	241	84	90	44	96	91	0	2126	2109	945	263	292	296	91	87	0	0	0	0	0	0	0	0	0	0	0	0	0	0	0	0	0	0	0	0.201	0.223	0.211	0.225	1.737	0.199	0.771	0.000	0.000	0.000	0.000	0.000	0.000	0.000	0.000	0.000	0.000	0.000	0.000	0.000	0.000	120	478	2237	2257	-2.317	Error	Error	374	1863	0	0	411	1846	0	0	0	0
2	19	15	""	"iYLL017W"	10020	16690	120	1697	1752	1033	85	89	38	100	97	0	1843	1792	945	268	275	83	89	88	0	0	0	0	0	0	0	0	0	0	0	0	0	0	0	0	0	0	0	1.023	1.094	1.110	1.122	1.791	1.079	0.853	0.000	0.000	0.000	0.000	0.000	0.000	0.000	0.000	0.000	0.000	0.000	0.000	0.000	0.000	120	478	3187	3191	0.033	Error	Error	1612	1575	0	0	1667	1524	0	0	0	0
2	20	15	""	"iYLL001W"	10210	16680	130	2530	2410	944	87	100	103	100	98	0	11869	11056	4253	268	303	221	100	100	0	0	0	0	0	0	0	0	0	0	0	0	0	0	0	0	0	0	0	0.211	0.215	0.214	0.216	1.390	0.200	0.910	0.000	0.000	0.000	0.000	0.000	0.000	0.000	0.000	0.000	0.000	0.000	0.000	0.000	0.000	120	526	14044	13111	-2.248	Error	Error	2443	11601	0	0	2323	10788	0	0	0	0
2	21	15	""	"iYLR003C"	10400	16690	120	1091	1072	418	82	89	43	100	99	0	1714	1632	695	271	297	204	91	87	0	0	0	0	0	0	0	0	0	0	0	0	0	0	0	0	0	0	0	0.699	0.727	0.727	0.781	1.688	0.630	0.767	0.000	0.000	0.000	0.000	0.000	0.000	0.000	0.000	0.000	0.000	0.000	0.000	0.000	0.000	120	476	2452	2351	-0.516	Error	Error	1009	1443	0	0	990	1361	0	0	0	0
2	22	15	""	"iYLR007W"	10580	16690	120	1265	1162	555	84	91	43	96	95	0	2015	1776	850	276	280	96	90	89	0	0	0	0	0	0	0	0	0	0	0	0	0	0	0	0	0	0	0	0.679	0.719	0.734	0.738	1.654	0.658	0.839	0.000	0.000	0.000	0.000	0.000	0.000	0.000	0.000	0.000	0.000	0.000	0.000	0.000	0.000	120	551	2920	2578	-0.558	Error	Error	1181	1739	0	0	1078	1500	0	0	0	0
2	1	16	""	"iYLR024C"	6590	16880	110	1565	1846	1166	84	113	144	95	95	0	1392	1593	1075	259	282	149	93	92	0	0	0	0	0	0	0	0	0	0	0	0	0	0	0	0	0	0	0	1.307	1.321	1.456	1.412	1.671	1.207	0.828	0.000	0.000	0.000	0.000	0.000	0.000	0.000	0.000	0.000	0.000	0.000	0.000	0.000	0.000	80	458	2614	3096	0.386	Error	Error	1481	1133	0	0	1762	1334	0	0	0	0
2	2	16	""	"iYLR028C"	6780	16870	130	1966	2131	905	88	120	150	99	96	0	1907	1925	746	259	291	168	95	92	0	0	0	0	0	0	0	0	0	0	0	0	0	0	0	0	0	0	0	1.140	1.226	1.228	1.289	1.618	1.190	0.865	0.000	0.000	0.000	0.000	0.000	0.000	0.000	0.000	0.000	0.000	0.000	0.000	0.000	0.000	120	551	3526	3709	0.188	Error	Error	1878	1648	0	0	2043	1666	0	0	0	0
2	3	16	""	"iYLR032W"	6970	16870	130	1887	1867	738	86	102	96	96	96	0	3545	3580	1479	258	289	178	96	95	0	0	0	0	0	0	0	0	0	0	0	0	0	0	0	0	0	0	0	0.548	0.536	0.536	0.561	1.708	0.493	0.892	0.000	0.000	0.000	0.000	0.000	0.000	0.000	0.000	0.000	0.000	0.000	0.000	0.000	0.000	120	519	5088	5103	-0.868	Error	Error	1801	3287	0	0	1781	3322	0	0	0	0
2	4	16	""	"iYLR044C"	7170	16870	140	4418	4171	1600	77	88	62	100	99	0	2665	2479	1018	247	271	148	94	92	0	0	0	0	0	0	0	0	0	0	0	0	0	0	0	0	0	0	0	1.795	1.834	1.861	2.034	1.857	1.818	0.882	0.000	0.000	0.000	0.000	0.000	0.000	0.000	0.000	0.000	0.000	0.000	0.000	0.000	0.000	156	545	6759	6326	0.844	Error	Error	4341	2418	0	0	4094	2232	0	0	0	0
2	5	16	""	"iYLR048W"	7360	16880	130	1475	1456	644	79	86	63	99	96	0	2982	2903	1388	240	251	86	95	94	0	0	0	0	0	0	0	0	0	0	0	0	0	0	0	0	0	0	0	0.509	0.517	0.510	0.541	1.486	0.467	0.878	0.000	0.000	0.000	0.000	0.000	0.000	0.000	0.000	0.000	0.000	0.000	0.000	0.000	0.000	120	491	4138	4040	-0.974	Error	Error	1396	2742	0	0	1377	2663	0	0	0	0
2	6	16	""	"iYLR052W"	7540	16870	130	1294	1223	429	81	87	42	97	96	0	1073	1026	392	253	264	89	93	91	0	0	0	0	0	0	0	0	0	0	0	0	0	0	0	0	0	0	0	1.479	1.477	1.499	1.480	1.675	1.351	0.806	0.000	0.000	0.000	0.000	0.000	0.000	0.000	0.000	0.000	0.000	0.000	0.000	0.000	0.000	120	490	2033	1915	0.565	Error	Error	1213	820	0	0	1142	773	0	0	0	0
2	7	16	""	"iYLR364W"	7740	16870	130	3756	3793	1460	81	122	269	100	99	0	1918	1924	764	254	288	235	95	93	0	0	0	0	0	0	0	0	0	0	0	0	0	0	0	0	0	0	0	2.209	2.223	2.222	2.330	1.535	2.127	0.885	0.000	0.000	0.000	0.000	0.000	0.000	0.000	0.000	0.000	0.000	0.000	0.000	0.000	0.000	120	573	5339	5382	1.143	Error	Error	3675	1664	0	0	3712	1670	0	0	0	0
2	8	16	""	"iYLR369W"	7950	16880	130	1869	1755	610	86	123	273	95	92	0	2102	1910	699	250	288	241	95	90	0	0	0	0	0	0	0	0	0	0	0	0	0	0	0	0	0	0	0	0.963	1.005	1.033	1.076	1.452	0.973	0.861	0.000	0.000	0.000	0.000	0.000	0.000	0.000	0.000	0.000	0.000	0.000	0.000	0.000	0.000	120	549	3635	3329	-0.055	Error	Error	1783	1852	0	0	1669	1660	0	0	0	0
2	9	16	""	"iYLR373C"	8140	16880	130	934	854	290	82	87	45	96	95	0	961	957	386	248	258	87	92	90	0	0	0	0	0	0	0	0	0	0	0	0	0	0	0	0	0	0	0	1.195	1.089	1.078	1.129	1.492	0.999	0.789	0.000	0.000	0.000	0.000	0.000	0.000	0.000	0.000	0.000	0.000	0.000	0.000	0.000	0.000	120	538	1565	1481	0.257	Error	Error	852	713	0	0	772	709	0	0	0	0
2	10	16	""	"iYLR389C"	8320	16870	130	3178	2974	921	81	103	145	99	96	0	2223	2105	664	249	275	198	96	94	0	0	0	0	0	0	0	0	0	0	0	0	0	0	0	0	0	0	0	1.569	1.559	1.632	1.581	1.433	1.553	0.861	0.000	0.000	0.000	0.000	0.000	0.000	0.000	0.000	0.000	0.000	0.000	0.000	0.000	0.000	120	525	5071	4749	0.650	Error	Error	3097	1974	0	0	2893	1856	0	0	0	0
2	11	16	""	"iYLR394W"	8510	16870	130	4154	3943	1273	85	115	166	97	96	0	11682	10967	3765	258	350	522	98	94	0	0	0	0	0	0	0	0	0	0	0	0	0	0	0	0	0	0	0	0.356	0.360	0.359	0.372	1.414	0.344	0.936	0.000	0.000	0.000	0.000	0.000	0.000	0.000	0.000	0.000	0.000	0.000	0.000	0.000	0.000	120	553	15493	14567	-1.489	Error	Error	4069	11424	0	0	3858	10709	0	0	0	0
2	12	16	""	"iYLR398C"	8700	16870	130	3045	2980	1246	86	108	121	98	97	0	2601	2563	1074	261	352	518	91	86	0	0	0	0	0	0	0	0	0	0	0	0	0	0	0	0	0	0	0	1.265	1.257	1.246	1.362	1.767	1.179	0.766	0.000	0.000	0.000	0.000	0.000	0.000	0.000	0.000	0.000	0.000	0.000	0.000	0.000	0.000	120	560	5299	5196	0.339	Error	Error	2959	2340	0	0	2894	2302	0	0	0	0
2	13	16	""	"iYLR412W-1"	8900	16870	130	3014	3161	1298	87	107	116	100	97	0	2851	2762	966	257	299	248	96	95	0	0	0	0	0	0	0	0	0	0	0	0	0	0	0	0	0	0	0	1.128	1.227	1.200	1.242	1.428	1.231	0.883	0.000	0.000	0.000	0.000	0.000	0.000	0.000	0.000	0.000	0.000	0.000	0.000	0.000	0.000	120	581	5521	5579	0.174	Error	Error	2927	2594	0	0	3074	2505	0	0	0	0
2	14	16	""	"iYLR417W"	9100	16880	130	2154	1996	583	86	96	58	99	99	0	4300	4055	1308	261	276	117	97	97	0	0	0	0	0	0	0	0	0	0	0	0	0	0	0	0	0	0	0	0.512	0.503	0.512	0.515	1.473	0.476	0.900	0.000	0.000	0.000	0.000	0.000	0.000	0.000	0.000	0.000	0.000	0.000	0.000	0.000	0.000	120	560	6107	5704	-0.966	Error	Error	2068	4039	0	0	1910	3794	0	0	0	0
2	15	16	""	"iYLRCdelta24"	9290	16880	130	1845	1783	642	81	87	40	100	100	0	1937	1848	641	248	259	95	97	97	0	0	0	0	0	0	0	0	0	0	0	0	0	0	0	0	0	0	0	1.044	1.064	1.065	1.103	1.508	1.035	0.868	0.000	0.000	0.000	0.000	0.000	0.000	0.000	0.000	0.000	0.000	0.000	0.000	0.000	0.000	120	504	3453	3302	0.063	Error	Error	1764	1689	0	0	1702	1600	0	0	0	0
2	16	16	""	"iYLR436C"	9460	16880	130	892	991	601	83	88	50	96	95	0	787	849	449	250	260	96	90	83	0	0	0	0	0	0	0	0	0	0	0	0	0	0	0	0	0	0	0	1.507	1.516	1.491	1.507	2.238	1.434	0.747	0.000	0.000	0.000	0.000	0.000	0.000	0.000	0.000	0.000	0.000	0.000	0.000	0.000	0.000	120	489	1346	1507	0.591	Error	Error	809	537	0	0	908	599	0	0	0	0
2	17	16	""	"iYLR439W"	9660	16880	140	906	928	448	86	92	54	95	94	0	2568	2435	1120	254	280	272	92	85	0	0	0	0	0	0	0	0	0	0	0	0	0	0	0	0	0	0	0	0.354	0.386	0.368	0.397	1.804	0.363	0.864	0.000	0.000	0.000	0.000	0.000	0.000	0.000	0.000	0.000	0.000	0.000	0.000	0.000	0.000	156	578	3134	3023	-1.497	Error	Error	820	2314	0	0	842	2181	0	0	0	0
2	18	16	""	"iYLR444C"	9860	16880	130	1051	1004	346	85	89	36	99	99	0	1186	1167	398	254	267	94	95	95	0	0	0	0	0	0	0	0	0	0	0	0	0	0	0	0	0	0	0	1.036	1.007	1.013	1.020	1.557	0.966	0.781	0.000	0.000	0.000	0.000	0.000	0.000	0.000	0.000	0.000	0.000	0.000	0.000	0.000	0.000	120	505	1898	1832	0.052	Error	Error	966	932	0	0	919	913	0	0	0	0
2	19	16	""	"iYMR130W"	10040	16880	120	1482	1374	444	88	93	46	100	98	0	5592	5234	1889	265	304	295	96	95	0	0	0	0	0	0	0	0	0	0	0	0	0	0	0	0	0	0	0	0.262	0.259	0.265	0.279	1.618	0.238	0.902	0.000	0.000	0.000	0.000	0.000	0.000	0.000	0.000	0.000	0.000	0.000	0.000	0.000	0.000	120	471	6721	6255	-1.934	Error	Error	1394	5327	0	0	1286	4969	0	0	0	0
2	20	16	""	"iYMR134W"	10230	16880	120	1298	1753	1287	85	92	47	100	100	0	2151	2586	1753	266	308	297	96	88	0	0	0	0	0	0	0	0	0	0	0	0	0	0	0	0	0	0	0	0.644	0.719	0.701	0.722	1.604	0.695	0.854	0.000	0.000	0.000	0.000	0.000	0.000	0.000	0.000	0.000	0.000	0.000	0.000	0.000	0.000	120	510	3098	3988	-0.636	Error	Error	1213	1885	0	0	1668	2320	0	0	0	0
2	21	16	""	"iYMR138W"	10420	16880	130	3522	3945	1795	85	103	107	100	100	0	2318	2303	970	268	300	202	96	94	0	0	0	0	0	0	0	0	0	0	0	0	0	0	0	0	0	0	0	1.677	1.897	1.850	1.948	1.521	1.904	0.883	0.000	0.000	0.000	0.000	0.000	0.000	0.000	0.000	0.000	0.000	0.000	0.000	0.000	0.000	120	572	5487	5895	0.746	Error	Error	3437	2050	0	0	3860	2035	0	0	0	0
2	22	16	""	"iYMR155W"	10620	16880	130	1148	1067	440	85	91	37	99	97	0	1615	1580	635	271	284	102	93	90	0	0	0	0	0	0	0	0	0	0	0	0	0	0	0	0	0	0	0	0.791	0.750	0.751	0.747	1.585	0.706	0.841	0.000	0.000	0.000	0.000	0.000	0.000	0.000	0.000	0.000	0.000	0.000	0.000	0.000	0.000	120	669	2407	2291	-0.338	Error	Error	1063	1344	0	0	982	1309	0	0	0	0
2	1	17	""	"itM(CAU)M"	6620	17070	120	756	715	240	77	85	57	97	95	0	1333	1274	435	242	254	95	94	93	0	0	0	0	0	0	0	0	0	0	0	0	0	0	0	0	0	0	0	0.622	0.618	0.625	0.607	1.587	0.550	0.793	0.000	0.000	0.000	0.000	0.000	0.000	0.000	0.000	0.000	0.000	0.000	0.000	0.000	0.000	120	596	1770	1670	-0.684	Error	Error	679	1091	0	0	638	1032	0	0	0	0
2	2	17	""	"iYMR161W"	6820	17070	120	2872	2618	963	84	93	67	100	99	0	11046	10121	3739	262	280	125	100	100	0	0	0	0	0	0	0	0	0	0	0	0	0	0	0	0	0	0	0	0.259	0.257	0.258	0.264	1.405	0.245	0.896	0.000	0.000	0.000	0.000	0.000	0.000	0.000	0.000	0.000	0.000	0.000	0.000	0.000	0.000	120	529	13572	12393	-1.952	Error	Error	2788	10784	0	0	2534	9859	0	0	0	0
2	3	17	""	"iYMR176W"	7010	17070	130	4644	4292	1709	83	91	48	100	100	0	4474	4306	1720	259	281	135	95	95	0	0	0	0	0	0	0	0	0	0	0	0	0	0	0	0	0	0	0	1.082	1.040	1.061	1.099	1.679	1.018	0.919	0.000	0.000	0.000	0.000	0.000	0.000	0.000	0.000	0.000	0.000	0.000	0.000	0.000	0.000	120	551	8776	8256	0.114	Error	Error	4561	4215	0	0	4209	4047	0	0	0	0
2	4	17	""	"iYMR180C"	7200	17070	130	2015	1939	738	80	94	78	100	97	0	1704	1647	575	256	266	95	95	95	0	0	0	0	0	0	0	0	0	0	0	0	0	0	0	0	0	0	0	1.336	1.336	1.323	1.343	1.386	1.321	0.857	0.000	0.000	0.000	0.000	0.000	0.000	0.000	0.000	0.000	0.000	0.000	0.000	0.000	0.000	120	548	3383	3250	0.418	Error	Error	1935	1448	0	0	1859	1391	0	0	0	0
2	5	17	""	"iYMR183C"	7400	17070	130	2368	2311	1058	83	96	79	100	100	0	2129	2055	846	251	261	88	96	95	0	0	0	0	0	0	0	0	0	0	0	0	0	0	0	0	0	0	0	1.217	1.235	1.247	1.224	1.482	1.254	0.889	0.000	0.000	0.000	0.000	0.000	0.000	0.000	0.000	0.000	0.000	0.000	0.000	0.000	0.000	120	513	4163	4032	0.283	Error	Error	2285	1878	0	0	2228	1804	0	0	0	0
2	6	17	""	"iYMR198W"	7580	17070	140	6881	6394	2420	85	88	39	100	100	0	4392	4070	1533	246	259	93	98	96	0	0	0	0	0	0	0	0	0	0	0	0	0	0	0	0	0	0	0	1.639	1.650	1.645	1.735	1.551	1.685	0.909	0.000	0.000	0.000	0.000	0.000	0.000	0.000	0.000	0.000	0.000	0.000	0.000	0.000	0.000	156	583	10942	10133	0.713	Error	Error	6796	4146	0	0	6309	3824	0	0	0	0
2	7	17	""	"iYMR202W"	7780	17070	130	969	908	306	84	101	174	94	89	0	1841	1752	647	245	269	171	95	91	0	0	0	0	0	0	0	0	0	0	0	0	0	0	0	0	0	0	0	0.555	0.547	0.537	0.564	1.466	0.503	0.863	0.000	0.000	0.000	0.000	0.000	0.000	0.000	0.000	0.000	0.000	0.000	0.000	0.000	0.000	120	521	2481	2331	-0.851	Error	Error	885	1596	0	0	824	1507	0	0	0	0
2	8	17	""	"iYMR206W"	7960	17070	140	3150	2954	1159	82	87	51	100	99	0	3442	3339	1397	246	259	103	98	94	0	0	0	0	0	0	0	0	0	0	0	0	0	0	0	0	0	0	0	0.960	0.929	0.922	1.005	1.648	0.906	0.876	0.000	0.000	0.000	0.000	0.000	0.000	0.000	0.000	0.000	0.000	0.000	0.000	0.000	0.000	156	584	6264	5965	-0.059	Error	Error	3068	3196	0	0	2872	3093	0	0	0	0
2	9	17	""	"iYNL148C"	8160	17070	130	1602	1489	488	78	83	32	100	98	0	1174	1144	397	246	253	76	94	94	0	0	0	0	0	0	0	0	0	0	0	0	0	0	0	0	0	0	0	1.642	1.571	1.561	1.580	1.380	1.539	0.842	0.000	0.000	0.000	0.000	0.000	0.000	0.000	0.000	0.000	0.000	0.000	0.000	0.000	0.000	120	502	2452	2309	0.716	Error	Error	1524	928	0	0	1411	898	0	0	0	0
2	10	17	""	"iYNL144C-0"	8340	17070	140	4155	3992	1661	79	97	129	100	99	0	2702	2608	1116	251	277	188	94	92	0	0	0	0	0	0	0	0	0	0	0	0	0	0	0	0	0	0	0	1.663	1.660	1.632	1.814	1.775	1.626	0.881	0.000	0.000	0.000	0.000	0.000	0.000	0.000	0.000	0.000	0.000	0.000	0.000	0.000	0.000	156	560	6527	6270	0.734	Error	Error	4076	2451	0	0	3913	2357	0	0	0	0
2	11	17	""	"iYNL141W"	8530	17070	120	2248	2078	713	84	104	101	99	97	0	6724	6394	2488	261	343	432	95	93	0	0	0	0	0	0	0	0	0	0	0	0	0	0	0	0	0	0	0	0.335	0.325	0.331	0.364	1.999	0.290	0.893	0.000	0.000	0.000	0.000	0.000	0.000	0.000	0.000	0.000	0.000	0.000	0.000	0.000	0.000	120	496	8627	8127	-1.579	Error	Error	2164	6463	0	0	1994	6133	0	0	0	0
2	12	17	""	"iYNL125C"	8730	17070	140	3063	3052	1343	89	138	243	99	96	0	2245	2197	941	263	356	401	91	87	0	0	0	0	0	0	0	0	0	0	0	0	0	0	0	0	0	0	0	1.501	1.532	1.583	1.580	1.467	1.522	0.823	0.000	0.000	0.000	0.000	0.000	0.000	0.000	0.000	0.000	0.000	0.000	0.000	0.000	0.000	156	655	4956	4897	0.585	Error	Error	2974	1982	0	0	2963	1934	0	0	0	0
2	13	17	""	"iYNL121C"	8910	17070	130	2524	2668	1355	89	105	91	99	98	0	2210	2245	1092	268	291	139	95	90	0	0	0	0	0	0	0	0	0	0	0	0	0	0	0	0	0	0	0	1.254	1.305	1.271	1.402	1.658	1.273	0.902	0.000	0.000	0.000	0.000	0.000	0.000	0.000	0.000	0.000	0.000	0.000	0.000	0.000	0.000	120	561	4377	4556	0.326	Error	Error	2435	1942	0	0	2579	1977	0	0	0	0
2	14	17	""	"iYNL116W"	9110	17070	130	1879	1727	622	90	105	86	99	95	0	3821	3545	1319	264	289	145	96	95	0	0	0	0	0	0	0	0	0	0	0	0	0	0	0	0	0	0	0	0.503	0.499	0.496	0.503	1.394	0.470	0.879	0.000	0.000	0.000	0.000	0.000	0.000	0.000	0.000	0.000	0.000	0.000	0.000	0.000	0.000	120	542	5346	4918	-0.992	Error	Error	1789	3557	0	0	1637	3281	0	0	0	0
2	15	17	""	"iYNL097C"	9300	17070	140	3932	4370	2154	83	91	55	100	99	0	3710	3729	1837	246	274	163	95	92	0	0	0	0	0	0	0	0	0	0	0	0	0	0	0	0	0	0	0	1.111	1.231	1.230	1.306	1.645	1.228	0.893	0.000	0.000	0.000	0.000	0.000	0.000	0.000	0.000	0.000	0.000	0.000	0.000	0.000	0.000	156	530	7313	7770	0.152	Error	Error	3849	3464	0	0	4287	3483	0	0	0	0
2	16	17	""	"iYNL094W"	9490	17070	140	2423	2730	1577	84	91	53	98	98	0	1920	2074	1145	255	270	103	92	91	0	0	0	0	0	0	0	0	0	0	0	0	0	0	0	0	0	0	0	1.405	1.455	1.465	1.528	1.602	1.447	0.890	0.000	0.000	0.000	0.000	0.000	0.000	0.000	0.000	0.000	0.000	0.000	0.000	0.000	0.000	156	515	4004	4465	0.490	Error	Error	2339	1665	0	0	2646	1819	0	0	0	0
2	17	17	""	"iYNL089C"	9680	17070	140	1765	2010	1158	85	88	38	98	96	0	1557	1635	816	248	261	91	92	90	0	0	0	0	0	0	0	0	0	0	0	0	0	0	0	0	0	0	0	1.283	1.388	1.371	1.379	1.536	1.424	0.878	0.000	0.000	0.000	0.000	0.000	0.000	0.000	0.000	0.000	0.000	0.000	0.000	0.000	0.000	156	543	2989	3312	0.360	Error	Error	1680	1309	0	0	1925	1387	0	0	0	0
2	18	17	""	"iYNL073W"	9880	17070	140	1541	1462	592	86	91	38	98	97	0	1621	1526	564	253	266	94	94	91	0	0	0	0	0	0	0	0	0	0	0	0	0	0	0	0	0	0	0	1.064	1.081	1.073	1.085	1.414	1.064	0.863	0.000	0.000	0.000	0.000	0.000	0.000	0.000	0.000	0.000	0.000	0.000	0.000	0.000	0.000	156	554	2823	2649	0.089	Error	Error	1455	1368	0	0	1376	1273	0	0	0	0
2	19	17	""	"iYNL069C"	10060	17070	130	3346	3704	1689	88	96	52	98	98	0	2831	2927	1241	266	291	197	94	92	0	0	0	0	0	0	0	0	0	0	0	0	0	0	0	0	0	0	0	1.270	1.359	1.345	1.358	1.383	1.370	0.885	0.000	0.000	0.000	0.000	0.000	0.000	0.000	0.000	0.000	0.000	0.000	0.000	0.000	0.000	120	488	5823	6277	0.345	Error	Error	3258	2565	0	0	3616	2661	0	0	0	0
2	20	17	""	"iYNL065W"	10240	17070	130	2584	2364	804	90	103	66	98	97	0	6738	6158	2275	277	316	240	95	94	0	0	0	0	0	0	0	0	0	0	0	0	0	0	0	0	0	0	0	0.386	0.387	0.386	0.410	1.646	0.361	0.916	0.000	0.000	0.000	0.000	0.000	0.000	0.000	0.000	0.000	0.000	0.000	0.000	0.000	0.000	120	533	8955	8155	-1.373	Error	Error	2494	6461	0	0	2274	5881	0	0	0	0
2	21	17	""	"itG(GCC)O2"	10420	17070	110	1595	1601	577	98	170	295	96	90	0	2220	2137	769	298	427	471	91	86	0	0	0	0	0	0	0	0	0	0	0	0	0	0	0	0	0	0	0	0.779	0.817	0.829	0.850	1.645	0.283	0.274	0.000	0.000	0.000	0.000	0.000	0.000	0.000	0.000	0.000	0.000	0.000	0.000	0.000	0.000	80	458	3419	3342	-0.361	Error	Error	1497	1922	0	0	1503	1839	0	0	0	0
2	22	17	""	"iYOL019W"	10620	17070	130	3550	3347	1177	94	145	245	96	95	0	6620	6050	2347	282	373	387	95	93	0	0	0	0	0	0	0	0	0	0	0	0	0	0	0	0	0	0	0	0.545	0.564	0.561	0.598	1.436	0.525	0.911	0.000	0.000	0.000	0.000	0.000	0.000	0.000	0.000	0.000	0.000	0.000	0.000	0.000	0.000	120	699	9794	9021	-0.875	Error	Error	3456	6338	0	0	3253	5768	0	0	0	0
2	1	18	""	"iYOL015W"	6640	17260	130	3605	3699	1655	83	91	67	99	98	0	9120	8817	3702	255	291	241	96	95	0	0	0	0	0	0	0	0	0	0	0	0	0	0	0	0	0	0	0	0.397	0.422	0.420	0.452	1.693	0.404	0.910	0.000	0.000	0.000	0.000	0.000	0.000	0.000	0.000	0.000	0.000	0.000	0.000	0.000	0.000	120	646	12387	12178	-1.332	Error	Error	3522	8865	0	0	3616	8562	0	0	0	0
2	2	18	""	"iYOL001W"	6830	17260	120	745	704	272	85	97	75	95	93	0	2479	2392	946	270	319	276	92	90	0	0	0	0	0	0	0	0	0	0	0	0	0	0	0	0	0	0	0	0.299	0.292	0.283	0.300	1.663	0.264	0.836	0.000	0.000	0.000	0.000	0.000	0.000	0.000	0.000	0.000	0.000	0.000	0.000	0.000	0.000	120	500	2869	2741	-1.743	Error	Error	660	2209	0	0	619	2122	0	0	0	0
2	3	18	""	"iYOR003W"	7020	17260	130	3164	3127	1371	85	92	51	99	99	0	6978	6538	2788	263	286	145	95	95	0	0	0	0	0	0	0	0	0	0	0	0	0	0	0	0	0	0	0	0.459	0.485	0.461	0.503	1.423	0.463	0.921	0.000	0.000	0.000	0.000	0.000	0.000	0.000	0.000	0.000	0.000	0.000	0.000	0.000	0.000	120	560	9794	9317	-1.125	Error	Error	3079	6715	0	0	3042	6275	0	0	0	0
2	4	18	""	"iYOR007C"	7210	17260	130	2158	2170	799	84	98	79	97	96	0	3239	3126	1196	263	297	194	95	93	0	0	0	0	0	0	0	0	0	0	0	0	0	0	0	0	0	0	0	0.697	0.729	0.725	0.753	1.381	0.682	0.892	0.000	0.000	0.000	0.000	0.000	0.000	0.000	0.000	0.000	0.000	0.000	0.000	0.000	0.000	120	549	5050	4949	-0.521	Error	Error	2074	2976	0	0	2086	2863	0	0	0	0
2	5	18	""	"iYOR018W"	7400	17260	130	2928	3338	1896	85	95	72	97	95	0	12706	13289	7541	265	297	185	96	95	0	0	0	0	0	0	0	0	0	0	0	0	0	0	0	0	0	0	0	0.229	0.250	0.253	0.264	1.631	0.234	0.899	0.000	0.000	0.000	0.000	0.000	0.000	0.000	0.000	0.000	0.000	0.000	0.000	0.000	0.000	120	537	15284	16277	-2.130	Error	Error	2843	12441	0	0	3253	13024	0	0	0	0
2	6	18	""	"iYOR021C"	7590	17260	130	2532	2346	801	85	88	39	98	98	0	2985	2785	1050	250	275	131	96	95	0	0	0	0	0	0	0	0	0	0	0	0	0	0	0	0	0	0	0	0.895	0.892	0.876	0.904	1.636	0.850	0.895	0.000	0.000	0.000	0.000	0.000	0.000	0.000	0.000	0.000	0.000	0.000	0.000	0.000	0.000	120	528	5182	4796	-0.161	Error	Error	2447	2735	0	0	2261	2535	0	0	0	0
2	7	18	""	"iYOR026W"	7780	17260	130	2502	2384	810	86	98	81	97	96	0	2161	1984	712	247	289	349	91	89	0	0	0	0	0	0	0	0	0	0	0	0	0	0	0	0	0	0	0	1.262	1.323	1.315	1.345	1.412	1.211	0.805	0.000	0.000	0.000	0.000	0.000	0.000	0.000	0.000	0.000	0.000	0.000	0.000	0.000	0.000	120	554	4330	4035	0.336	Error	Error	2416	1914	0	0	2298	1737	0	0	0	0
2	8	18	""	"iYOR042W"	7980	17270	130	748	705	240	86	96	80	94	94	0	830	818	286	253	286	336	81	31	0	0	0	0	0	0	0	0	0	0	0	0	0	0	0	0	0	0	0	1.147	1.096	1.089	1.094	1.581	0.997	0.735	0.000	0.000	0.000	0.000	0.000	0.000	0.000	0.000	0.000	0.000	0.000	0.000	0.000	0.000	120	525	1239	1184	0.198	Error	Error	662	577	0	0	619	565	0	0	0	0
2	9	18	""	"iYOR045W"	8160	17260	130	1743	1805	791	83	91	51	99	99	0	7713	7656	3256	260	308	388	95	94	0	0	0	0	0	0	0	0	0	0	0	0	0	0	0	0	0	0	0	0.223	0.233	0.235	0.244	1.443	0.221	0.923	0.000	0.000	0.000	0.000	0.000	0.000	0.000	0.000	0.000	0.000	0.000	0.000	0.000	0.000	120	522	9113	9118	-2.167	Error	Error	1660	7453	0	0	1722	7396	0	0	0	0
2	10	18	""	"iYOR049C"	8350	17260	130	3015	3114	1275	80	93	60	100	99	0	4380	4226	1629	259	311	393	95	92	0	0	0	0	0	0	0	0	0	0	0	0	0	0	0	0	0	0	0	0.712	0.765	0.755	0.793	1.503	0.733	0.879	0.000	0.000	0.000	0.000	0.000	0.000	0.000	0.000	0.000	0.000	0.000	0.000	0.000	0.000	120	526	7056	7001	-0.490	Error	Error	2935	4121	0	0	3034	3967	0	0	0	0
2	11	18	""	"iYOR356W"	8540	17260	130	367	357	135	84	106	141	85	50	0	674	666	251	248	282	198	86	55	0	0	0	0	0	0	0	0	0	0	0	0	0	0	0	0	0	0	0	0.664	0.653	0.607	0.605	1.767	0.521	0.649	0.000	0.000	0.000	0.000	0.000	0.000	0.000	0.000	0.000	0.000	0.000	0.000	0.000	0.000	120	584	709	691	-0.590	Error	Error	283	426	0	0	273	418	0	0	0	0
2	12	18	""	"iYOR360C"	8730	17280	110	2555	2592	1243	85	140	269	95	92	0	3009	2780	1348	257	314	288	93	92	0	0	0	0	0	0	0	0	0	0	0	0	0	0	0	0	0	0	0	0.898	0.994	1.011	1.013	1.353	0.918	0.887	0.000	0.000	0.000	0.000	0.000	0.000	0.000	0.000	0.000	0.000	0.000	0.000	0.000	0.000	80	473	5222	5030	-0.156	Error	Error	2470	2752	0	0	2507	2523	0	0	0	0
2	13	18	""	"iYOR366W"	8930	17270	120	2290	2170	918	84	118	213	94	91	0	3183	2948	1271	259	301	257	92	89	0	0	0	0	0	0	0	0	0	0	0	0	0	0	0	0	0	0	0	0.754	0.776	0.778	0.789	1.404	0.739	0.881	0.000	0.000	0.000	0.000	0.000	0.000	0.000	0.000	0.000	0.000	0.000	0.000	0.000	0.000	120	534	5130	4775	-0.407	Error	Error	2206	2924	0	0	2086	2689	0	0	0	0
2	14	18	""	"iYOR380W-1"	9110	17260	130	4780	4628	1910	85	132	401	97	95	0	3290	2993	1182	251	307	372	94	91	0	0	0	0	0	0	0	0	0	0	0	0	0	0	0	0	0	0	0	1.545	1.657	1.637	1.702	1.486	1.657	0.891	0.000	0.000	0.000	0.000	0.000	0.000	0.000	0.000	0.000	0.000	0.000	0.000	0.000	0.000	120	546	7734	7285	0.628	Error	Error	4695	3039	0	0	4543	2742	0	0	0	0
2	15	18	""	"iYOR383C"	9300	17260	130	3800	3816	1626	86	139	404	95	92	0	4881	4899	2065	251	321	383	95	93	0	0	0	0	0	0	0	0	0	0	0	0	0	0	0	0	0	0	0	0.802	0.802	0.788	0.834	1.522	0.802	0.912	0.000	0.000	0.000	0.000	0.000	0.000	0.000	0.000	0.000	0.000	0.000	0.000	0.000	0.000	120	541	8344	8378	-0.318	Error	Error	3714	4630	0	0	3730	4648	0	0	0	0
2	16	18	""	"iYOR387C-0"	9500	17270	130	3217	3132	1685	84	94	56	98	97	0	3634	3482	1815	252	277	132	93	90	0	0	0	0	0	0	0	0	0	0	0	0	0	0	0	0	0	0	0	0.926	0.944	0.951	0.993	1.604	0.929	0.891	0.000	0.000	0.000	0.000	0.000	0.000	0.000	0.000	0.000	0.000	0.000	0.000	0.000	0.000	120	527	6515	6278	-0.110	Error	Error	3133	3382	0	0	3048	3230	0	0	0	0
2	17	18	""	"iYPL275W-2"	9680	17270	130	4715	4359	1789	85	93	48	100	99	0	2785	2580	1068	253	267	97	93	91	0	0	0	0	0	0	0	0	0	0	0	0	0	0	0	0	0	0	0	1.829	1.837	1.822	2.023	1.870	1.829	0.885	0.000	0.000	0.000	0.000	0.000	0.000	0.000	0.000	0.000	0.000	0.000	0.000	0.000	0.000	120	523	7162	6601	0.871	Error	Error	4630	2532	0	0	4274	2327	0	0	0	0
2	18	18	""	"iYPL272C-1"	9880	17270	130	3442	3573	1669	86	94	47	100	99	0	2191	2137	956	258	272	97	94	93	0	0	0	0	0	0	0	0	0	0	0	0	0	0	0	0	0	0	0	1.736	1.856	1.871	1.912	1.627	1.864	0.887	0.000	0.000	0.000	0.000	0.000	0.000	0.000	0.000	0.000	0.000	0.000	0.000	0.000	0.000	120	554	5289	5366	0.796	Error	Error	3356	1933	0	0	3487	1879	0	0	0	0
2	19	18	""	"iYPL268W"	10070	17260	130	2015	1908	678	86	94	43	98	97	0	2323	2196	842	264	273	87	94	93	0	0	0	0	0	0	0	0	0	0	0	0	0	0	0	0	0	0	0	0.937	0.943	0.970	1.004	1.778	0.903	0.850	0.000	0.000	0.000	0.000	0.000	0.000	0.000	0.000	0.000	0.000	0.000	0.000	0.000	0.000	120	554	3988	3754	-0.094	Error	Error	1929	2059	0	0	1822	1932	0	0	0	0
2	20	18	""	"iYPL253C"	10260	17260	130	2570	2804	1237	90	99	53	98	98	0	6476	6776	2955	284	314	220	99	97	0	0	0	0	0	0	0	0	0	0	0	0	0	0	0	0	0	0	0	0.401	0.418	0.408	0.411	1.435	0.398	0.923	0.000	0.000	0.000	0.000	0.000	0.000	0.000	0.000	0.000	0.000	0.000	0.000	0.000	0.000	120	545	8672	9206	-1.320	Error	Error	2480	6192	0	0	2714	6492	0	0	0	0
2	21	18	""	"iYPL249C"	10440	17260	130	3766	4321	2185	94	127	199	97	97	0	3456	3651	1912	294	346	282	92	90	0	0	0	0	0	0	0	0	0	0	0	0	0	0	0	0	0	0	0	1.161	1.259	1.222	1.391	1.733	1.210	0.918	0.000	0.000	0.000	0.000	0.000	0.000	0.000	0.000	0.000	0.000	0.000	0.000	0.000	0.000	120	589	6834	7584	0.216	Error	Error	3672	3162	0	0	4227	3357	0	0	0	0
2	22	18	""	"iYPL245W"	10640	17270	120	708	669	319	89	100	61	93	85	0	1096	1078	462	280	302	148	90	85	0	0	0	0	0	0	0	0	0	0	0	0	0	0	0	0	0	0	0	0.759	0.727	0.691	0.714	1.563	0.681	0.777	0.000	0.000	0.000	0.000	0.000	0.000	0.000	0.000	0.000	0.000	0.000	0.000	0.000	0.000	120	631	1435	1378	-0.399	Error	Error	619	816	0	0	580	798	0	0	0	0
2	1	19	""	"iYPR067W"	6650	17450	120	975	904	356	87	95	65	96	95	0	2183	2034	865	270	300	224	90	90	0	0	0	0	0	0	0	0	0	0	0	0	0	0	0	0	0	0	0	0.464	0.463	0.450	0.456	1.542	0.427	0.874	0.000	0.000	0.000	0.000	0.000	0.000	0.000	0.000	0.000	0.000	0.000	0.000	0.000	0.000	120	594	2801	2581	-1.107	Error	Error	888	1913	0	0	817	1764	0	0	0	0
2	2	19	""	"iYPR071W"	6840	17450	130	5373	5223	2176	88	96	47	100	100	0	7598	7069	2919	281	307	172	96	95	0	0	0	0	0	0	0	0	0	0	0	0	0	0	0	0	0	0	0	0.722	0.756	0.760	0.782	1.422	0.735	0.912	0.000	0.000	0.000	0.000	0.000	0.000	0.000	0.000	0.000	0.000	0.000	0.000	0.000	0.000	120	552	12602	11923	-0.469	Error	Error	5285	7317	0	0	5135	6788	0	0	0	0
2	3	19	""	"iYPR074C"	7030	17460	130	3803	3604	1322	90	98	56	99	99	0	2566	2426	885	264	297	197	94	94	0	0	0	0	0	0	0	0	0	0	0	0	0	0	0	0	0	0	0	1.613	1.625	1.641	1.674	1.564	1.620	0.875	0.000	0.000	0.000	0.000	0.000	0.000	0.000	0.000	0.000	0.000	0.000	0.000	0.000	0.000	120	494	6015	5676	0.690	Error	Error	3713	2302	0	0	3514	2162	0	0	0	0
2	4	19	""	"iYPR094W"	7210	17450	130	936	878	277	84	100	92	95	93	0	1259	1218	429	255	292	195	93	90	0	0	0	0	0	0	0	0	0	0	0	0	0	0	0	0	0	0	0	0.849	0.825	0.815	0.816	1.478	0.744	0.837	0.000	0.000	0.000	0.000	0.000	0.000	0.000	0.000	0.000	0.000	0.000	0.000	0.000	0.000	120	505	1856	1757	-0.237	Error	Error	852	1004	0	0	794	963	0	0	0	0
2	5	19	""	"iYPR098C"	7400	17450	130	3026	2959	1017	87	100	74	100	100	0	3086	2984	935	263	297	172	98	96	0	0	0	0	0	0	0	0	0	0	0	0	0	0	0	0	0	0	0	1.041	1.055	1.054	1.093	1.691	1.046	0.891	0.000	0.000	0.000	0.000	0.000	0.000	0.000	0.000	0.000	0.000	0.000	0.000	0.000	0.000	120	520	5762	5593	0.058	Error	Error	2939	2823	0	0	2872	2721	0	0	0	0
2	6	19	""	"iYPR103W"	7590	17450	130	2406	2379	976	89	102	66	99	99	0	7200	6819	2548	262	314	246	96	95	0	0	0	0	0	0	0	0	0	0	0	0	0	0	0	0	0	0	0	0.334	0.349	0.350	0.347	1.402	0.337	0.917	0.000	0.000	0.000	0.000	0.000	0.000	0.000	0.000	0.000	0.000	0.000	0.000	0.000	0.000	120	520	9255	8847	-1.582	Error	Error	2317	6938	0	0	2290	6557	0	0	0	0
2	7	19	""	"iYPRWsigma2-0"	7780	17450	130	4795	4500	1680	87	116	139	98	97	0	6093	5843	2153	258	369	585	96	94	0	0	0	0	0	0	0	0	0	0	0	0	0	0	0	0	0	0	0	0.807	0.790	0.793	0.785	1.294	0.759	0.903	0.000	0.000	0.000	0.000	0.000	0.000	0.000	0.000	0.000	0.000	0.000	0.000	0.000	0.000	120	520	10543	9998	-0.310	Error	Error	4708	5835	0	0	4413	5585	0	0	0	0
2	8	19	""	"itC(GCA)P2"	7970	17450	130	1596	1527	585	90	110	127	97	95	0	2219	2107	781	260	338	550	93	84	0	0	0	0	0	0	0	0	0	0	0	0	0	0	0	0	0	0	0	0.769	0.778	0.779	0.806	1.512	0.708	0.806	0.000	0.000	0.000	0.000	0.000	0.000	0.000	0.000	0.000	0.000	0.000	0.000	0.000	0.000	120	505	3465	3284	-0.379	Error	Error	1506	1959	0	0	1437	1847	0	0	0	0
2	9	19	""	"iYPR121W-0"	8160	17450	130	3282	3485	1675	90	100	59	100	100	0	3485	3440	1461	262	305	361	95	93	0	0	0	0	0	0	0	0	0	0	0	0	0	0	0	0	0	0	0	0.990	1.068	1.061	1.056	1.341	1.079	0.909	0.000	0.000	0.000	0.000	0.000	0.000	0.000	0.000	0.000	0.000	0.000	0.000	0.000	0.000	120	527	6415	6573	-0.014	Error	Error	3192	3223	0	0	3395	3178	0	0	0	0
2	10	19	""	"itN(GUU)P"	8360	17450	130	941	969	504	85	95	54	95	95	0	2247	2312	1079	256	271	104	94	93	0	0	0	0	0	0	0	0	0	0	0	0	0	0	0	0	0	0	0	0.430	0.430	0.423	0.410	1.502	0.415	0.880	0.000	0.000	0.000	0.000	0.000	0.000	0.000	0.000	0.000	0.000	0.000	0.000	0.000	0.000	120	532	2847	2940	-1.218	Error	Error	856	1991	0	0	884	2056	0	0	0	0
2	11	19	""	"iYPR141C"	8550	17460	130	856	821	361	83	88	35	96	92	0	1084	1103	456	250	259	81	93	90	0	0	0	0	0	0	0	0	0	0	0	0	0	0	0	0	0	0	0	0.927	0.865	0.843	0.827	1.629	0.845	0.795	0.000	0.000	0.000	0.000	0.000	0.000	0.000	0.000	0.000	0.000	0.000	0.000	0.000	0.000	120	505	1607	1591	-0.110	Error	Error	773	834	0	0	738	853	0	0	0	0
2	12	19	""	"iSNR45"	8740	17460	130	3038	3176	1516	83	88	37	98	96	0	2148	2211	1017	257	270	93	94	94	0	0	0	0	0	0	0	0	0	0	0	0	0	0	0	0	0	0	0	1.563	1.583	1.595	1.613	1.496	1.596	0.882	0.000	0.000	0.000	0.000	0.000	0.000	0.000	0.000	0.000	0.000	0.000	0.000	0.000	0.000	120	497	4846	5047	0.644	Error	Error	2955	1891	0	0	3093	1954	0	0	0	0
2	13	19	""	"iYAL064C-A-3"	8930	17460	130	432	449	208	83	89	37	94	92	0	638	655	302	258	265	89	89	84	0	0	0	0	0	0	0	0	0	0	0	0	0	0	0	0	0	0	0	0.918	0.922	0.923	0.881	2.229	0.760	0.660	0.000	0.000	0.000	0.000	0.000	0.000	0.000	0.000	0.000	0.000	0.000	0.000	0.000	0.000	120	487	729	763	-0.123	Error	Error	349	380	0	0	366	397	0	0	0	0
2	14	19	""	"iYBLWdelta3"	9120	17460	120	932	965	463	85	107	264	90	79	0	2038	1988	851	254	281	251	90	90	0	0	0	0	0	0	0	0	0	0	0	0	0	0	0	0	0	0	0	0.475	0.507	0.490	0.519	1.854	0.479	0.820	0.000	0.000	0.000	0.000	0.000	0.000	0.000	0.000	0.000	0.000	0.000	0.000	0.000	0.000	120	455	2631	2614	-1.075	Error	Error	847	1784	0	0	880	1734	0	0	0	0
2	15	19	""	"YBLCdelta7"	9300	17450	120	1440	1356	523	85	94	51	100	95	0	1830	1683	741	253	274	109	94	88	0	0	0	0	0	0	0	0	0	0	0	0	0	0	0	0	0	0	0	0.859	0.889	0.877	0.946	1.696	0.823	0.856	0.000	0.000	0.000	0.000	0.000	0.000	0.000	0.000	0.000	0.000	0.000	0.000	0.000	0.000	120	480	2932	2701	-0.219	Error	Error	1355	1577	0	0	1271	1430	0	0	0	0
2	16	19	""	"itE(UUC)C"	9500	17450	120	761	748	322	81	87	40	96	94	0	1239	1247	529	248	262	89	92	92	0	0	0	0	0	0	0	0	0	0	0	0	0	0	0	0	0	0	0	0.686	0.668	0.683	0.680	1.707	0.622	0.804	0.000	0.000	0.000	0.000	0.000	0.000	0.000	0.000	0.000	0.000	0.000	0.000	0.000	0.000	120	487	1671	1666	-0.543	Error	Error	680	991	0	0	667	999	0	0	0	0
2	17	19	""	"itL(CAA)C"	9700	17450	130	1832	1692	700	85	92	44	95	95	0	3441	3301	1349	249	267	106	95	93	0	0	0	0	0	0	0	0	0	0	0	0	0	0	0	0	0	0	0	0.547	0.527	0.541	0.545	1.781	0.496	0.886	0.000	0.000	0.000	0.000	0.000	0.000	0.000	0.000	0.000	0.000	0.000	0.000	0.000	0.000	120	490	4939	4659	-0.870	Error	Error	1747	3192	0	0	1607	3052	0	0	0	0
2	18	19	""	"iYCL014W"	9880	17460	120	832	793	339	88	95	45	95	92	0	3897	3514	1403	255	288	190	95	92	0	0	0	0	0	0	0	0	0	0	0	0	0	0	0	0	0	0	0	0.204	0.216	0.208	0.211	1.668	0.203	0.854	0.000	0.000	0.000	0.000	0.000	0.000	0.000	0.000	0.000	0.000	0.000	0.000	0.000	0.000	120	454	4386	3964	-2.291	Error	Error	744	3642	0	0	705	3259	0	0	0	0
2	19	19	""	"iYCR002C"	10080	17460	130	1529	1418	538	85	90	37	98	98	0	3394	3199	1203	255	281	174	95	93	0	0	0	0	0	0	0	0	0	0	0	0	0	0	0	0	0	0	0	0.460	0.453	0.448	0.464	1.703	0.436	0.904	0.000	0.000	0.000	0.000	0.000	0.000	0.000	0.000	0.000	0.000	0.000	0.000	0.000	0.000	120	502	4583	4277	-1.120	Error	Error	1444	3139	0	0	1333	2944	0	0	0	0
2	20	19	""	"iYCR006C"	10260	17460	120	2377	2430	981	86	98	89	100	100	0	2830	2760	929	267	290	168	97	96	0	0	0	0	0	0	0	0	0	0	0	0	0	0	0	0	0	0	0	0.894	0.940	0.918	0.935	1.463	0.930	0.889	0.000	0.000	0.000	0.000	0.000	0.000	0.000	0.000	0.000	0.000	0.000	0.000	0.000	0.000	120	468	4854	4837	-0.162	Error	Error	2291	2563	0	0	2344	2493	0	0	0	0
2	21	19	""	"iYCRCdelta6-A"	10460	17460	120	3284	3428	1644	86	97	88	100	100	0	3948	3729	1771	278	299	163	95	92	0	0	0	0	0	0	0	0	0	0	0	0	0	0	0	0	0	0	0	0.871	0.968	0.975	1.033	1.486	0.946	0.903	0.000	0.000	0.000	0.000	0.000	0.000	0.000	0.000	0.000	0.000	0.000	0.000	0.000	0.000	120	486	6868	6793	-0.199	Error	Error	3198	3670	0	0	3342	3451	0	0	0	0
2	22	19	""	"YCRCtau1"	10640	17460	110	235	275	196	81	88	38	83	71	0	695	750	401	274	285	101	90	81	0	0	0	0	0	0	0	0	0	0	0	0	0	0	0	0	0	0	0	0.366	0.408	0.402	0.336	2.491	0.346	0.521	0.000	0.000	0.000	0.000	0.000	0.000	0.000	0.000	0.000	0.000	0.000	0.000	0.000	0.000	80	462	575	670	-1.451	Error	Error	154	421	0	0	194	476	0	0	0	0
2	1	20	""	"SNR189"	6650	17650	120	462	466	191	91	99	46	95	92	0	707	688	237	269	284	96	90	85	0	0	0	0	0	0	0	0	0	0	0	0	0	0	0	0	0	0	0	0.847	0.895	0.839	0.847	2.234	0.782	0.612	0.000	0.000	0.000	0.000	0.000	0.000	0.000	0.000	0.000	0.000	0.000	0.000	0.000	0.000	120	674	809	794	-0.240	Error	Error	371	438	0	0	375	419	0	0	0	0
2	2	20	""	"YCRWomega3"	6840	17650	120	2291	2196	1001	90	96	44	100	99	0	3712	3448	1380	277	289	103	98	98	0	0	0	0	0	0	0	0	0	0	0	0	0	0	0	0	0	0	0	0.641	0.664	0.648	0.662	1.436	0.664	0.893	0.000	0.000	0.000	0.000	0.000	0.000	0.000	0.000	0.000	0.000	0.000	0.000	0.000	0.000	120	559	5636	5277	-0.642	Error	Error	2201	3435	0	0	2106	3171	0	0	0	0
2	3	20	"EMPTY"	"EMPTY"	7020	17640	150	85	89	36	92	99	50	7	1	0	244	257	91	266	293	165	3	0	0	0	0	0	0	0	0	0	0	0	0	0	0	0	0	0	0	0	0	0.318	0.333	0.380	0.414	4.095	0.091	0.043	0.000	0.000	0.000	0.000	0.000	0.000	0.000	0.000	0.000	0.000	0.000	0.000	0.000	0.000	156	716	-29	-12	-1.652	Error	Error	-7	-22	0	0	-3	-9	0	0	-75	0
2	4	20	"EMPTY"	"EMPTY"	7210	17640	150	79	81	32	88	97	61	1	0	0	244	250	82	261	284	134	4	0	0	0	0	0	0	0	0	0	0	0	0	0	0	0	0	0	0	0	0	0.529	0.636	0.465	0.372	4.429	0.080	0.029	0.000	0.000	0.000	0.000	0.000	0.000	0.000	0.000	0.000	0.000	0.000	0.000	0.000	0.000	156	711	-26	-18	-0.918	Error	Error	-9	-17	0	0	-7	-11	0	0	-75	0
2	5	20	"EMPTY"	"EMPTY"	7400	17640	150	83	89	36	88	96	55	5	1	0	269	271	86	257	275	117	6	2	0	0	0	0	0	0	0	0	0	0	0	0	0	0	0	0	0	0	0	-0.417	0.071	0.447	0.453	3.792	0.084	0.029	0.000	0.000	0.000	0.000	0.000	0.000	0.000	0.000	0.000	0.000	0.000	0.000	0.000	0.000	156	728	7	15	Error	Error	Error	-5	12	0	0	1	14	0	0	-75	0
2	6	20	"EMPTY"	"EMPTY"	7590	17640	150	87	94	41	89	99	57	7	1	0	269	270	87	258	290	205	1	0	0	0	0	0	0	0	0	0	0	0	0	0	0	0	0	0	0	0	0	-0.182	0.417	0.440	0.481	3.938	0.137	0.138	0.000	0.000	0.000	0.000	0.000	0.000	0.000	0.000	0.000	0.000	0.000	0.000	0.000	0.000	156	728	9	17	Error	Error	Error	-2	11	0	0	5	12	0	0	-75	0
2	7	20	"EMPTY"	"EMPTY"	7780	17640	150	90	94	38	91	107	107	1	0	0	260	262	84	257	316	379	0	0	0	0	0	0	0	0	0	0	0	0	0	0	0	0	0	0	0	0	0	-0.333	0.600	0.406	0.410	4.193	0.185	0.411	0.000	0.000	0.000	0.000	0.000	0.000	0.000	0.000	0.000	0.000	0.000	0.000	0.000	0.000	156	728	2	8	Error	Error	Error	-1	3	0	0	3	5	0	0	-75	0
2	8	20	"EMPTY"	"EMPTY"	7970	17640	150	85	87	34	89	100	85	1	0	0	262	268	84	253	285	278	0	0	0	0	0	0	0	0	0	0	0	0	0	0	0	0	0	0	0	0	0	-0.444	-0.133	0.462	0.473	4.346	0.050	0.009	0.000	0.000	0.000	0.000	0.000	0.000	0.000	0.000	0.000	0.000	0.000	0.000	0.000	0.000	156	728	5	13	Error	Error	Error	-4	9	0	0	-2	15	0	0	-75	0
2	9	20	"EMPTY"	"EMPTY"	8160	17640	150	84	88	38	88	95	46	10	2	0	251	255	80	251	265	98	12	1	0	0	0	0	0	0	0	0	0	0	0	0	0	0	0	0	0	0	0	100000.000	0.000	0.434	0.538	3.977	0.104	0.040	0.000	0.000	0.000	0.000	0.000	0.000	0.000	0.000	0.000	0.000	0.000	0.000	0.000	0.000	156	736	-4	4	16.610	Error	Error	-4	0	0	0	0	4	0	0	-75	0
2	10	20	"EMPTY"	"EMPTY"	8350	17640	150	84	90	34	87	93	44	12	1	0	248	264	92	245	260	94	17	3	0	0	0	0	0	0	0	0	0	0	0	0	0	0	0	0	0	0	0	-1.000	0.158	0.448	0.403	3.579	0.057	0.015	0.000	0.000	0.000	0.000	0.000	0.000	0.000	0.000	0.000	0.000	0.000	0.000	0.000	0.000	156	730	0	22	Error	Error	Error	-3	3	0	0	3	19	0	0	-75	0
2	11	20	"EMPTY"	"EMPTY"	8540	17640	150	87	88	35	85	88	36	14	3	0	244	248	72	252	262	90	10	0	0	0	0	0	0	0	0	0	0	0	0	0	0	0	0	0	0	0	0	-0.250	-0.750	0.288	0.365	4.454	0.026	0.003	0.000	0.000	0.000	0.000	0.000	0.000	0.000	0.000	0.000	0.000	0.000	0.000	0.000	0.000	156	706	-6	-1	Error	Error	Error	2	-8	0	0	3	-4	0	0	-75	0
2	12	20	"EMPTY"	"EMPTY"	8730	17640	150	82	90	36	85	89	39	14	4	0	245	258	86	258	270	102	7	3	0	0	0	0	0	0	0	0	0	0	0	0	0	0	0	0	0	0	0	0.231	100000.000	0.420	0.513	4.670	0.081	0.033	0.000	0.000	0.000	0.000	0.000	0.000	0.000	0.000	0.000	0.000	0.000	0.000	0.000	0.000	156	697	-16	5	-2.115	Error	Error	-3	-13	0	0	5	0	0	0	-75	0
2	13	20	"EMPTY"	"EMPTY"	8920	17640	150	83	87	34	85	91	41	10	1	0	245	260	99	261	274	102	11	3	0	0	0	0	0	0	0	0	0	0	0	0	0	0	0	0	0	0	0	0.125	-2.000	0.337	0.329	3.628	0.056	0.013	0.000	0.000	0.000	0.000	0.000	0.000	0.000	0.000	0.000	0.000	0.000	0.000	0.000	0.000	156	697	-18	1	-3.000	Error	Error	-2	-16	0	0	2	-1	0	0	-75	0
2	14	20	"EMPTY"	"EMPTY"	9110	17640	150	78	86	35	85	91	38	16	2	0	258	272	87	258	270	91	17	3	0	0	0	0	0	0	0	0	0	0	0	0	0	0	0	0	0	0	0	100000.000	0.071	0.465	0.453	4.127	0.116	0.064	0.000	0.000	0.000	0.000	0.000	0.000	0.000	0.000	0.000	0.000	0.000	0.000	0.000	0.000	156	696	-7	15	16.610	Error	Error	-7	0	0	0	1	14	0	0	-75	0
2	15	20	"EMPTY"	"EMPTY"	9300	17640	150	78	83	36	80	88	41	14	3	0	244	251	76	248	260	91	13	1	0	0	0	0	0	0	0	0	0	0	0	0	0	0	0	0	0	0	0	0.500	1.000	0.408	0.479	3.867	0.074	0.015	0.000	0.000	0.000	0.000	0.000	0.000	0.000	0.000	0.000	0.000	0.000	0.000	0.000	0.000	156	719	-6	6	-1.000	Error	Error	-2	-4	0	0	3	3	0	0	-75	0
2	16	20	"EMPTY"	"EMPTY"	9490	17640	150	77	81	28	77	83	37	13	1	0	246	259	75	235	250	126	8	1	0	0	0	0	0	0	0	0	0	0	0	0	0	0	0	0	0	0	0	0.000	0.167	0.416	0.406	4.062	0.018	0.005	0.000	0.000	0.000	0.000	0.000	0.000	0.000	0.000	0.000	0.000	0.000	0.000	0.000	0.000	156	744	11	28	Error	Error	Error	0	11	0	0	4	24	0	0	-75	0
2	17	20	"EMPTY"	"EMPTY"	9680	17640	150	76	82	42	79	86	42	11	3	0	247	256	87	241	261	143	4	0	0	0	0	0	0	0	0	0	0	0	0	0	0	0	0	0	0	0	0	-0.500	0.200	0.537	0.566	4.005	0.037	0.017	0.000	0.000	0.000	0.000	0.000	0.000	0.000	0.000	0.000	0.000	0.000	0.000	0.000	0.000	156	723	3	18	Error	Error	Error	-3	6	0	0	3	15	0	0	-75	0
2	18	20	"EMPTY"	"EMPTY"	9870	17640	150	90	96	41	90	98	49	14	2	0	264	274	99	260	294	220	2	0	0	0	0	0	0	0	0	0	0	0	0	0	0	0	0	0	0	0	0	0.000	0.429	0.455	0.473	3.760	0.034	0.021	0.000	0.000	0.000	0.000	0.000	0.000	0.000	0.000	0.000	0.000	0.000	0.000	0.000	0.000	156	705	4	20	Error	Error	Error	0	4	0	0	6	14	0	0	-75	0
2	19	20	"EMPTY"	"EMPTY"	10060	17640	150	87	94	41	93	100	44	9	3	0	252	267	90	263	293	211	3	0	0	0	0	0	0	0	0	0	0	0	0	0	0	0	0	0	0	0	0	0.545	0.250	0.358	0.376	4.033	0.021	0.008	0.000	0.000	0.000	0.000	0.000	0.000	0.000	0.000	0.000	0.000	0.000	0.000	0.000	0.000	156	698	-17	5	-0.874	Error	Error	-6	-11	0	0	1	4	0	0	-75	0
2	20	20	"EMPTY"	"EMPTY"	10250	17640	150	85	91	39	85	93	75	7	0	0	245	261	92	256	290	362	0	0	0	0	0	0	0	0	0	0	0	0	0	0	0	0	0	0	0	0	0	0.000	1.200	0.360	0.379	3.988	0.068	0.020	0.000	0.000	0.000	0.000	0.000	0.000	0.000	0.000	0.000	0.000	0.000	0.000	0.000	0.000	156	695	-11	11	Error	Error	Error	0	-11	0	0	6	5	0	0	-75	0
2	21	20	"EMPTY"	"EMPTY"	10440	17640	150	79	83	31	84	95	76	1	0	0	249	259	81	266	285	147	3	0	0	0	0	0	0	0	0	0	0	0	0	0	0	0	0	0	0	0	0	0.294	0.143	0.367	0.379	4.014	0.060	0.014	0.000	0.000	0.000	0.000	0.000	0.000	0.000	0.000	0.000	0.000	0.000	0.000	0.000	0.000	156	710	-22	-8	-1.766	Error	Error	-5	-17	0	0	-1	-7	0	0	-75	0
2	22	20	"EMPTY"	"EMPTY"	10630	17640	150	83	86	33	86	92	39	10	2	0	246	268	103	266	277	91	13	2	0	0	0	0	0	0	0	0	0	0	0	0	0	0	0	0	0	0	0	0.150	0.000	0.345	0.390	3.895	0.101	0.049	0.000	0.000	0.000	0.000	0.000	0.000	0.000	0.000	0.000	0.000	0.000	0.000	0.000	0.000	156	916	-23	2	-2.737	Error	Error	-3	-20	0	0	0	2	0	0	-75	0
3	1	1	""	"YBL083C"	11060	13980	110	5284	4504	2306	96	138	337	92	87	0	3021	2704	1439	276	341	398	80	77	0	0	0	0	0	0	0	0	0	0	0	0	0	0	0	0	0	0	0	1.890	1.815	1.866	2.006	1.529	1.826	0.860	0.000	0.000	0.000	0.000	0.000	0.000	0.000	0.000	0.000	0.000	0.000	0.000	0.000	0.000	80	478	7933	6836	0.918	Error	Error	5188	2745	0	0	4408	2428	0	0	0	0
3	2	1	""	"YBL112C"	11220	13990	120	26891	23001	13378	97	190	509	100	94	0	16950	14168	8948	276	389	552	96	86	0	0	0	0	0	0	0	0	0	0	0	0	0	0	0	0	0	0	0	1.607	1.649	1.652	1.851	1.898	1.599	0.933	0.000	0.000	0.000	0.000	0.000	0.000	0.000	0.000	0.000	0.000	0.000	0.000	0.000	0.000	120	601	43468	36796	0.684	Error	Error	26794	16674	0	0	22904	13892	0	0	0	0
3	3	1	"CDS1"	"YBR029C"	11440	13990	120	1897	1787	1246	100	161	409	81	75	0	1565	1522	1025	289	359	441	75	67	0	0	0	0	0	0	0	0	0	0	0	0	0	0	0	0	0	0	0	1.408	1.368	1.286	1.298	1.910	1.326	0.806	0.000	0.000	0.000	0.000	0.000	0.000	0.000	0.000	0.000	0.000	0.000	0.000	0.000	0.000	120	629	3073	2920	0.494	Error	Error	1797	1276	0	0	1687	1233	0	0	0	0
3	4	1	"BOI1"	"YBL085W"	11620	13980	110	303	302	164	95	110	86	73	55	0	647	640	332	287	313	143	76	66	0	0	0	0	0	0	0	0	0	0	0	0	0	0	0	0	0	0	0	0.578	0.586	0.486	0.468	2.679	0.404	0.517	0.000	0.000	0.000	0.000	0.000	0.000	0.000	0.000	0.000	0.000	0.000	0.000	0.000	0.000	80	514	568	560	-0.791	Error	Error	208	360	0	0	207	353	0	0	0	0
3	5	1	"NTH2"	"YBR001C"	11820	13980	120	6026	5363	2712	97	109	64	96	95	0	20754	18002	10317	292	319	145	94	92	0	0	0	0	0	0	0	0	0	0	0	0	0	0	0	0	0	0	0	0.290	0.297	0.292	0.361	2.187	0.268	0.874	0.000	0.000	0.000	0.000	0.000	0.000	0.000	0.000	0.000	0.000	0.000	0.000	0.000	0.000	120	639	26391	22976	-1.787	Error	Error	5929	20462	0	0	5266	17710	0	0	0	0
3	6	1	"RPL4A"	"YBR031W"	12010	13980	110	4676	4133	2335	96	184	625	82	77	0	8152	7003	4160	304	521	1364	77	76	0	0	0	0	0	0	0	0	0	0	0	0	0	0	0	0	0	0	0	0.584	0.603	0.598	0.665	2.228	0.578	0.861	0.000	0.000	0.000	0.000	0.000	0.000	0.000	0.000	0.000	0.000	0.000	0.000	0.000	0.000	80	526	12428	10736	-0.777	Error	Error	4580	7848	0	0	4037	6699	0	0	0	0
3	7	1	"RPL23A"	"YBL087C"	12210	13990	120	5926	5370	2514	92	167	578	92	88	0	4892	4609	2486	293	482	1264	83	76	0	0	0	0	0	0	0	0	0	0	0	0	0	0	0	0	0	0	0	1.269	1.223	1.236	1.369	1.697	1.129	0.889	0.000	0.000	0.000	0.000	0.000	0.000	0.000	0.000	0.000	0.000	0.000	0.000	0.000	0.000	120	618	10433	9594	0.343	Error	Error	5834	4599	0	0	5278	4316	0	0	0	0
3	8	1	"COQ1"	"YBR003W"	12390	13980	110	9415	7711	3803	95	377	1551	83	77	0	24976	21164	10448	296	1256	4883	81	81	0	0	0	0	0	0	0	0	0	0	0	0	0	0	0	0	0	0	0	0.378	0.365	0.369	0.383	1.605	0.350	0.888	0.000	0.000	0.000	0.000	0.000	0.000	0.000	0.000	0.000	0.000	0.000	0.000	0.000	0.000	80	500	34000	28484	-1.405	Error	Error	9320	24680	0	0	7616	20868	0	0	0	0
3	9	1	""	"YBR033W"	12580	13990	120	4416	4466	2156	95	333	1411	89	80	0	9099	8809	4983	307	1109	4444	82	49	0	0	0	0	0	0	0	0	0	0	0	0	0	0	0	0	0	0	0	0.491	0.514	0.529	0.601	1.913	0.390	0.795	0.000	0.000	0.000	0.000	0.000	0.000	0.000	0.000	0.000	0.000	0.000	0.000	0.000	0.000	120	607	13113	12873	-1.025	Error	Error	4321	8792	0	0	4371	8502	0	0	0	0
3	10	1	""	"YBL089W"	12770	13990	120	5267	4600	2184	93	139	377	90	87	0	12862	11608	5915	296	522	1767	86	83	0	0	0	0	0	0	0	0	0	0	0	0	0	0	0	0	0	0	0	0.412	0.398	0.413	0.418	1.523	0.366	0.874	0.000	0.000	0.000	0.000	0.000	0.000	0.000	0.000	0.000	0.000	0.000	0.000	0.000	0.000	120	591	17740	15819	-1.280	Error	Error	5174	12566	0	0	4507	11312	0	0	0	0
3	11	1	""	"YBR005W"	12980	13990	120	3823	3484	1682	96	143	379	91	89	0	7940	7472	3795	298	531	1787	86	80	0	0	0	0	0	0	0	0	0	0	0	0	0	0	0	0	0	0	0	0.488	0.472	0.499	0.528	1.685	0.454	0.888	0.000	0.000	0.000	0.000	0.000	0.000	0.000	0.000	0.000	0.000	0.000	0.000	0.000	0.000	120	577	11369	10562	-1.036	Error	Error	3727	7642	0	0	3388	7174	0	0	0	0
3	12	1	"PDX3"	"YBR035C"	13150	13990	120	4002	3810	1967	99	117	110	100	97	0	3370	3070	1604	309	342	275	88	85	0	0	0	0	0	0	0	0	0	0	0	0	0	0	0	0	0	0	0	1.275	1.344	1.376	1.480	1.627	1.344	0.883	0.000	0.000	0.000	0.000	0.000	0.000	0.000	0.000	0.000	0.000	0.000	0.000	0.000	0.000	120	531	6964	6472	0.351	Error	Error	3903	3061	0	0	3711	2761	0	0	0	0
3	13	1	""	"YCL047C"	13320	13980	120	6983	6499	2666	100	110	52	100	100	0	13538	12573	5198	307	319	104	99	99	0	0	0	0	0	0	0	0	0	0	0	0	0	0	0	0	0	0	0	0.520	0.522	0.520	0.525	1.359	0.503	0.909	0.000	0.000	0.000	0.000	0.000	0.000	0.000	0.000	0.000	0.000	0.000	0.000	0.000	0.000	120	568	20114	18665	-0.943	Error	Error	6883	13231	0	0	6399	12266	0	0	0	0
3	14	1	"RVS161"	"YCR009C"	13520	13980	120	4456	3986	1661	96	104	82	98	96	0	18228	16785	7718	292	303	96	100	97	0	0	0	0	0	0	0	0	0	0	0	0	0	0	0	0	0	0	0	0.243	0.236	0.240	0.258	1.890	0.215	0.899	0.000	0.000	0.000	0.000	0.000	0.000	0.000	0.000	0.000	0.000	0.000	0.000	0.000	0.000	120	613	22296	20383	-2.040	Error	Error	4360	17936	0	0	3890	16493	0	0	0	0
3	15	1	"PHO87"	"YCR037C"	13720	13990	130	3134	3018	1652	89	97	82	95	91	0	7323	6987	3697	282	293	95	90	89	0	0	0	0	0	0	0	0	0	0	0	0	0	0	0	0	0	0	0	0.432	0.437	0.460	0.424	2.145	0.411	0.822	0.000	0.000	0.000	0.000	0.000	0.000	0.000	0.000	0.000	0.000	0.000	0.000	0.000	0.000	120	582	10086	9634	-1.209	Error	Error	3045	7041	0	0	2929	6705	0	0	0	0
3	16	1	""	"YCL049C"	13880	13980	140	3421	3032	1686	86	90	36	92	91	0	3671	3247	2106	279	283	84	80	78	0	0	0	0	0	0	0	0	0	0	0	0	0	0	0	0	0	0	0	0.983	0.993	0.989	1.040	2.495	0.890	0.856	0.000	0.000	0.000	0.000	0.000	0.000	0.000	0.000	0.000	0.000	0.000	0.000	0.000	0.000	156	618	6727	5914	-0.024	Error	Error	3335	3392	0	0	2946	2968	0	0	0	0
3	17	1	"adp1"	"YCR011C"	14070	13980	140	2832	2724	1532	84	90	38	94	93	0	4954	4997	3084	280	282	83	89	89	0	0	0	0	0	0	0	0	0	0	0	0	0	0	0	0	0	0	0	0.588	0.560	0.576	0.595	2.043	0.505	0.842	0.000	0.000	0.000	0.000	0.000	0.000	0.000	0.000	0.000	0.000	0.000	0.000	0.000	0.000	156	747	7422	7357	-0.766	Error	Error	2748	4674	0	0	2640	4717	0	0	0	0
3	18	1	"MATAlpha2"	"YCR039C"	14290	13980	130	8741	8112	4061	92	102	50	100	100	0	13419	12723	6547	284	292	95	100	97	0	0	0	0	0	0	0	0	0	0	0	0	0	0	0	0	0	0	0	0.658	0.645	0.659	0.707	1.809	0.619	0.914	0.000	0.000	0.000	0.000	0.000	0.000	0.000	0.000	0.000	0.000	0.000	0.000	0.000	0.000	120	694	21784	20459	-0.603	Error	Error	8649	13135	0	0	8020	12439	0	0	0	0
3	19	1	"LRE1"	"YCL051W"	14490	13990	120	4993	4502	2036	99	106	46	98	97	0	12975	11449	5482	291	305	97	95	93	0	0	0	0	0	0	0	0	0	0	0	0	0	0	0	0	0	0	0	0.386	0.395	0.406	0.443	1.930	0.371	0.907	0.000	0.000	0.000	0.000	0.000	0.000	0.000	0.000	0.000	0.000	0.000	0.000	0.000	0.000	120	593	17578	15561	-1.374	Error	Error	4894	12684	0	0	4403	11158	0	0	0	0
3	20	1	""	"YCR013C"	14680	13990	120	2941	2689	1099	98	103	43	100	100	0	6451	5698	2627	286	304	114	96	91	0	0	0	0	0	0	0	0	0	0	0	0	0	0	0	0	0	0	0	0.461	0.479	0.500	0.550	1.776	0.441	0.882	0.000	0.000	0.000	0.000	0.000	0.000	0.000	0.000	0.000	0.000	0.000	0.000	0.000	0.000	120	529	9008	8003	-1.117	Error	Error	2843	6165	0	0	2591	5412	0	0	0	0
3	21	1	""	"YCR041W"	14840	13990	120	9954	8838	4982	104	132	156	98	95	0	12418	10871	6647	300	347	266	87	83	0	0	0	0	0	0	0	0	0	0	0	0	0	0	0	0	0	0	0	0.813	0.826	0.873	1.130	2.313	0.791	0.930	0.000	0.000	0.000	0.000	0.000	0.000	0.000	0.000	0.000	0.000	0.000	0.000	0.000	0.000	120	549	21968	19305	-0.299	Error	Error	9850	12118	0	0	8734	10571	0	0	0	0
3	22	1	"SPB1"	"YCL054W"	15040	13990	130	3487	3600	2211	104	129	143	94	92	0	7399	7451	4317	298	337	249	90	89	0	0	0	0	0	0	0	0	0	0	0	0	0	0	0	0	0	0	0	0.476	0.489	0.485	0.518	1.710	0.478	0.897	0.000	0.000	0.000	0.000	0.000	0.000	0.000	0.000	0.000	0.000	0.000	0.000	0.000	0.000	120	745	10484	10649	-1.070	Error	Error	3383	7101	0	0	3496	7153	0	0	0	0
3	1	2	""	"YCR015C"	11050	14180	120	8010	7237	2855	95	116	249	97	95	0	7140	6499	3027	273	299	232	90	90	0	0	0	0	0	0	0	0	0	0	0	0	0	0	0	0	0	0	0	1.153	1.147	1.149	1.333	1.896	1.069	0.872	0.000	0.000	0.000	0.000	0.000	0.000	0.000	0.000	0.000	0.000	0.000	0.000	0.000	0.000	120	540	14782	13368	0.205	Error	Error	7915	6867	0	0	7142	6226	0	0	0	0
3	2	2	""	"YCR043C"	11250	14180	120	3924	3607	1700	94	108	87	95	94	0	2796	2480	1239	272	296	161	85	84	0	0	0	0	0	0	0	0	0	0	0	0	0	0	0	0	0	0	0	1.517	1.591	1.613	1.692	1.745	1.553	0.889	0.000	0.000	0.000	0.000	0.000	0.000	0.000	0.000	0.000	0.000	0.000	0.000	0.000	0.000	120	543	6354	5721	0.602	Error	Error	3830	2524	0	0	3513	2208	0	0	0	0
3	3	2	""	"YDR003W"	11450	14180	120	4106	3581	1571	101	109	56	96	96	0	7181	6370	3024	292	309	122	92	91	0	0	0	0	0	0	0	0	0	0	0	0	0	0	0	0	0	0	0	0.581	0.573	0.584	0.615	1.866	0.528	0.887	0.000	0.000	0.000	0.000	0.000	0.000	0.000	0.000	0.000	0.000	0.000	0.000	0.000	0.000	120	515	10894	9558	-0.782	Error	Error	4005	6889	0	0	3480	6078	0	0	0	0
3	4	2	""	"YDR034C-A"	11640	14180	120	12386	10793	4887	104	112	57	99	98	0	18242	15998	7477	305	323	112	99	99	0	0	0	0	0	0	0	0	0	0	0	0	0	0	0	0	0	0	0	0.685	0.681	0.698	0.705	1.711	0.656	0.920	0.000	0.000	0.000	0.000	0.000	0.000	0.000	0.000	0.000	0.000	0.000	0.000	0.000	0.000	120	503	30219	26382	-0.546	Error	Error	12282	17937	0	0	10689	15693	0	0	0	0
3	5	2	""	"YDR063W"	11810	14180	120	713	660	281	100	108	48	90	88	0	997	992	476	292	312	105	86	84	0	0	0	0	0	0	0	0	0	0	0	0	0	0	0	0	0	0	0	0.870	0.800	0.766	0.773	1.822	0.633	0.681	0.000	0.000	0.000	0.000	0.000	0.000	0.000	0.000	0.000	0.000	0.000	0.000	0.000	0.000	120	498	1318	1260	-0.202	Error	Error	613	705	0	0	560	700	0	0	0	0
3	6	2	"MAF1"	"YDR005C"	12010	14180	120	3473	3278	1503	99	146	488	89	87	0	16887	15842	8369	290	387	850	90	88	0	0	0	0	0	0	0	0	0	0	0	0	0	0	0	0	0	0	0	0.203	0.204	0.210	0.234	2.164	0.186	0.875	0.000	0.000	0.000	0.000	0.000	0.000	0.000	0.000	0.000	0.000	0.000	0.000	0.000	0.000	120	552	19971	18731	-2.298	Error	Error	3374	16597	0	0	3179	15552	0	0	0	0
3	7	2	""	"YDR034C-D"	12210	14180	120	16766	15123	7267	98	103	44	100	100	0	26467	23606	12292	289	305	103	100	100	0	0	0	0	0	0	0	0	0	0	0	0	0	0	0	0	0	0	0	0.637	0.644	0.634	0.690	1.609	0.608	0.897	0.000	0.000	0.000	0.000	0.000	0.000	0.000	0.000	0.000	0.000	0.000	0.000	0.000	0.000	120	470	42846	38342	-0.651	Error	Error	16668	26178	0	0	15025	23317	0	0	0	0
3	8	2	""	"YDR065W"	12380	14180	120	7809	6851	3046	102	183	821	92	85	0	14730	13005	5784	304	535	2440	88	84	0	0	0	0	0	0	0	0	0	0	0	0	0	0	0	0	0	0	0	0.534	0.531	0.529	0.552	1.591	0.516	0.925	0.000	0.000	0.000	0.000	0.000	0.000	0.000	0.000	0.000	0.000	0.000	0.000	0.000	0.000	120	523	22133	19450	-0.904	Error	Error	7707	14426	0	0	6749	12701	0	0	0	0
3	9	2	"trp1"	"YDR007W"	12590	14190	120	4101	3774	1810	101	111	54	100	99	0	3334	3101	1483	303	321	116	95	90	0	0	0	0	0	0	0	0	0	0	0	0	0	0	0	0	0	0	0	1.320	1.313	1.310	1.390	1.580	1.300	0.881	0.000	0.000	0.000	0.000	0.000	0.000	0.000	0.000	0.000	0.000	0.000	0.000	0.000	0.000	120	446	7031	6471	0.400	Error	Error	4000	3031	0	0	3673	2798	0	0	0	0
3	10	2	"ARO3"	"YDR035W"	12750	14180	140	7018	6049	3102	96	105	53	95	95	0	6631	5942	3440	281	307	177	91	89	0	0	0	0	0	0	0	0	0	0	0	0	0	0	0	0	0	0	0	1.090	1.052	1.021	1.102	2.022	0.975	0.883	0.000	0.000	0.000	0.000	0.000	0.000	0.000	0.000	0.000	0.000	0.000	0.000	0.000	0.000	156	512	13272	11614	0.124	Error	Error	6922	6350	0	0	5953	5661	0	0	0	0
3	11	2	""	"YDR067C"	12950	14180	130	7583	6608	3044	96	109	85	100	98	0	16010	13964	6589	291	363	587	91	88	0	0	0	0	0	0	0	0	0	0	0	0	0	0	0	0	0	0	0	0.476	0.476	0.473	0.499	1.642	0.451	0.901	0.000	0.000	0.000	0.000	0.000	0.000	0.000	0.000	0.000	0.000	0.000	0.000	0.000	0.000	120	531	23206	20185	-1.070	Error	Error	7487	15719	0	0	6512	13673	0	0	0	0
3	12	2	"GAL3"	"YDR009W"	13140	14190	120	6909	6298	2417	107	135	144	100	100	0	7258	6729	2505	315	425	702	98	95	0	0	0	0	0	0	0	0	0	0	0	0	0	0	0	0	0	0	0	0.980	0.965	0.977	0.971	1.376	0.956	0.875	0.000	0.000	0.000	0.000	0.000	0.000	0.000	0.000	0.000	0.000	0.000	0.000	0.000	0.000	120	484	13745	12605	-0.030	Error	Error	6802	6943	0	0	6191	6414	0	0	0	0
3	13	2	"KRS1"	"YDR037W"	13340	14180	130	7345	6686	2447	108	129	120	100	99	0	18887	17630	6974	312	360	348	100	99	0	0	0	0	0	0	0	0	0	0	0	0	0	0	0	0	0	0	0	0.390	0.380	0.384	0.391	1.544	0.349	0.891	0.000	0.000	0.000	0.000	0.000	0.000	0.000	0.000	0.000	0.000	0.000	0.000	0.000	0.000	120	542	25812	23896	-1.360	Error	Error	7237	18575	0	0	6578	17318	0	0	0	0
3	14	2	"DOA4"	"YDR069C"	13520	14180	130	532	515	242	96	106	46	87	87	0	1367	1294	635	291	309	101	84	84	0	0	0	0	0	0	0	0	0	0	0	0	0	0	0	0	0	0	0	0.405	0.418	0.403	0.374	1.832	0.365	0.740	0.000	0.000	0.000	0.000	0.000	0.000	0.000	0.000	0.000	0.000	0.000	0.000	0.000	0.000	120	593	1512	1422	-1.303	Error	Error	436	1076	0	0	419	1003	0	0	0	0
3	15	2	""	"YDR365W-B"	13750	14170	120	19209	18891	7096	90	96	41	100	100	0	26686	25509	10601	283	296	96	100	100	0	0	0	0	0	0	0	0	0	0	0	0	0	0	0	0	0	0	0	0.724	0.745	0.732	0.769	1.445	0.706	0.883	0.000	0.000	0.000	0.000	0.000	0.000	0.000	0.000	0.000	0.000	0.000	0.000	0.000	0.000	120	508	45522	44027	-0.466	Error	Error	19119	26403	0	0	18801	25226	0	0	0	0
3	16	2	"NCB2"	"YDR397C"	13920	14170	130	3180	3697	1953	91	96	41	100	99	0	2989	3122	1755	284	292	92	90	90	0	0	0	0	0	0	0	0	0	0	0	0	0	0	0	0	0	0	0	1.142	1.271	1.259	1.296	1.467	1.190	0.882	0.000	0.000	0.000	0.000	0.000	0.000	0.000	0.000	0.000	0.000	0.000	0.000	0.000	0.000	120	523	5794	6444	0.192	Error	Error	3089	2705	0	0	3606	2838	0	0	0	0
3	17	2	"TIF35"	"YDR429C"	14130	14180	130	5623	5308	2504	91	126	334	93	89	0	6965	6447	3160	276	308	306	88	87	0	0	0	0	0	0	0	0	0	0	0	0	0	0	0	0	0	0	0	0.827	0.845	0.844	0.930	1.730	0.810	0.899	0.000	0.000	0.000	0.000	0.000	0.000	0.000	0.000	0.000	0.000	0.000	0.000	0.000	0.000	120	609	12221	11388	-0.274	Error	Error	5532	6689	0	0	5217	6171	0	0	0	0
3	18	2	""	"YDR367W"	14320	14180	130	4519	3918	1553	100	117	117	95	95	0	4028	3656	1542	280	307	212	90	87	0	0	0	0	0	0	0	0	0	0	0	0	0	0	0	0	0	0	0	1.179	1.131	1.148	1.145	1.425	1.097	0.886	0.000	0.000	0.000	0.000	0.000	0.000	0.000	0.000	0.000	0.000	0.000	0.000	0.000	0.000	120	583	8167	7194	0.238	Error	Error	4419	3748	0	0	3818	3376	0	0	0	0
3	19	2	"HPT1"	"YDR399W"	14510	14180	120	4191	3951	1822	103	109	51	96	96	0	3545	3279	1621	286	298	92	90	90	0	0	0	0	0	0	0	0	0	0	0	0	0	0	0	0	0	0	0	1.254	1.286	1.264	1.386	1.745	1.226	0.893	0.000	0.000	0.000	0.000	0.000	0.000	0.000	0.000	0.000	0.000	0.000	0.000	0.000	0.000	120	469	7347	6841	0.327	Error	Error	4088	3259	0	0	3848	2993	0	0	0	0
3	20	2	""	"YDR431W"	14680	14180	130	1824	1646	761	102	116	105	94	90	0	1206	1186	524	291	329	336	85	74	0	0	0	0	0	0	0	0	0	0	0	0	0	0	0	0	0	0	0	1.882	1.725	1.648	1.624	2.019	1.660	0.803	0.000	0.000	0.000	0.000	0.000	0.000	0.000	0.000	0.000	0.000	0.000	0.000	0.000	0.000	120	547	2637	2439	0.912	Error	Error	1722	915	0	0	1544	895	0	0	0	0
3	21	2	"xrs2"	"YDR369C"	14890	14180	120	6825	5766	2846	108	134	130	99	96	0	7096	6393	3294	305	347	238	93	88	0	0	0	0	0	0	0	0	0	0	0	0	0	0	0	0	0	0	0	0.989	0.929	0.922	1.001	1.478	0.896	0.925	0.000	0.000	0.000	0.000	0.000	0.000	0.000	0.000	0.000	0.000	0.000	0.000	0.000	0.000	120	550	13508	11746	-0.016	Error	Error	6717	6791	0	0	5658	6088	0	0	0	0
3	22	2	""	"YDR401W"	15080	14180	130	3500	3349	1655	107	125	113	94	93	0	8995	8378	4443	297	332	213	94	92	0	0	0	0	0	0	0	0	0	0	0	0	0	0	0	0	0	0	0	0.390	0.401	0.397	0.454	1.967	0.371	0.850	0.000	0.000	0.000	0.000	0.000	0.000	0.000	0.000	0.000	0.000	0.000	0.000	0.000	0.000	120	675	12091	11323	-1.358	Error	Error	3393	8698	0	0	3242	8081	0	0	0	0
3	1	3	""	"YDR433W"	11080	14370	130	1345	1522	1045	95	105	67	92	90	0	1369	1420	843	274	309	342	81	73	0	0	0	0	0	0	0	0	0	0	0	0	0	0	0	0	0	0	0	1.142	1.245	1.179	1.218	1.640	1.205	0.834	0.000	0.000	0.000	0.000	0.000	0.000	0.000	0.000	0.000	0.000	0.000	0.000	0.000	0.000	120	639	2345	2573	0.191	Error	Error	1250	1095	0	0	1427	1146	0	0	0	0
3	2	3	""	"YDR371W"	11260	14380	120	10797	9572	3468	98	121	158	100	100	0	13445	12269	4501	279	365	657	98	98	0	0	0	0	0	0	0	0	0	0	0	0	0	0	0	0	0	0	0	0.813	0.790	0.791	0.786	1.326	0.774	0.898	0.000	0.000	0.000	0.000	0.000	0.000	0.000	0.000	0.000	0.000	0.000	0.000	0.000	0.000	120	531	23865	21464	-0.299	Error	Error	10699	13166	0	0	9474	11990	0	0	0	0
3	3	3	"DIT1"	"YDR403W"	11470	14370	130	6382	6125	2653	109	124	104	97	96	0	11044	10223	4201	301	349	368	95	94	0	0	0	0	0	0	0	0	0	0	0	0	0	0	0	0	0	0	0	0.584	0.606	0.597	0.620	1.963	0.593	0.906	0.000	0.000	0.000	0.000	0.000	0.000	0.000	0.000	0.000	0.000	0.000	0.000	0.000	0.000	120	611	17016	15938	-0.776	Error	Error	6273	10743	0	0	6016	9922	0	0	0	0
3	4	3	""	"YDR435C"	11670	14370	120	5333	5009	2690	104	117	71	97	96	0	7725	7200	3862	296	321	143	96	95	0	0	0	0	0	0	0	0	0	0	0	0	0	0	0	0	0	0	0	0.704	0.710	0.709	0.719	1.661	0.693	0.906	0.000	0.000	0.000	0.000	0.000	0.000	0.000	0.000	0.000	0.000	0.000	0.000	0.000	0.000	120	549	12658	11809	-0.507	Error	Error	5229	7429	0	0	4905	6904	0	0	0	0
3	5	3	"SWI4"	"YER111C"	11880	14370	120	336	333	140	100	110	55	88	80	0	540	535	278	284	304	115	75	56	0	0	0	0	0	0	0	0	0	0	0	0	0	0	0	0	0	0	0	0.922	0.928	0.889	0.873	2.460	0.523	0.353	0.000	0.000	0.000	0.000	0.000	0.000	0.000	0.000	0.000	0.000	0.000	0.000	0.000	0.000	120	543	492	484	-0.117	Error	Error	236	256	0	0	233	251	0	0	0	0
3	6	3	""	"YER140W"	12070	14370	120	4741	4978	2866	99	103	45	99	95	0	3191	3291	1811	274	289	118	91	90	0	0	0	0	0	0	0	0	0	0	0	0	0	0	0	0	0	0	0	1.591	1.617	1.602	1.700	1.819	1.644	0.875	0.000	0.000	0.000	0.000	0.000	0.000	0.000	0.000	0.000	0.000	0.000	0.000	0.000	0.000	120	500	7559	7896	0.670	Error	Error	4642	2917	0	0	4879	3017	0	0	0	0
3	7	3	"rad3"	"YER171W"	12250	14370	120	4530	4477	2637	95	100	40	97	96	0	12567	12811	7944	274	289	96	91	90	0	0	0	0	0	0	0	0	0	0	0	0	0	0	0	0	0	0	0	0.361	0.350	0.349	0.394	1.778	0.329	0.918	0.000	0.000	0.000	0.000	0.000	0.000	0.000	0.000	0.000	0.000	0.000	0.000	0.000	0.000	120	502	16728	16919	-1.471	Error	Error	4435	12293	0	0	4382	12537	0	0	0	0
3	8	3	""	"YER113C"	12450	14370	120	5829	5746	3013	100	112	76	96	96	0	5148	4678	2476	291	315	184	92	89	0	0	0	0	0	0	0	0	0	0	0	0	0	0	0	0	0	0	0	1.180	1.287	1.306	1.398	1.543	1.249	0.886	0.000	0.000	0.000	0.000	0.000	0.000	0.000	0.000	0.000	0.000	0.000	0.000	0.000	0.000	120	540	10586	10033	0.238	Error	Error	5729	4857	0	0	5646	4387	0	0	0	0
3	9	3	"MAG1"	"YER142C"	12640	14370	120	1872	2131	1318	97	107	56	95	94	0	3488	3939	2566	279	294	106	91	90	0	0	0	0	0	0	0	0	0	0	0	0	0	0	0	0	0	0	0	0.553	0.556	0.548	0.568	1.861	0.513	0.885	0.000	0.000	0.000	0.000	0.000	0.000	0.000	0.000	0.000	0.000	0.000	0.000	0.000	0.000	120	465	4984	5694	-0.854	Error	Error	1775	3209	0	0	2034	3660	0	0	0	0
3	10	3	"rad24"	"YER173W"	12830	14370	120	4907	5358	3152	98	103	41	100	100	0	4444	4516	2528	282	294	94	99	96	0	0	0	0	0	0	0	0	0	0	0	0	0	0	0	0	0	0	0	1.155	1.242	1.221	1.288	1.473	1.245	0.880	0.000	0.000	0.000	0.000	0.000	0.000	0.000	0.000	0.000	0.000	0.000	0.000	0.000	0.000	120	494	8971	9494	0.208	Error	Error	4809	4162	0	0	5260	4234	0	0	0	0
3	11	3	"spr6"	"YER115C"	13030	14370	120	3127	3112	1582	107	131	220	94	93	0	2071	1917	914	294	364	601	81	70	0	0	0	0	0	0	0	0	0	0	0	0	0	0	0	0	0	0	0	1.699	1.852	1.921	1.954	1.742	1.878	0.877	0.000	0.000	0.000	0.000	0.000	0.000	0.000	0.000	0.000	0.000	0.000	0.000	0.000	0.000	120	504	4797	4628	0.765	Error	Error	3020	1777	0	0	3005	1623	0	0	0	0
3	12	3	"UBP5"	"YER144C"	13210	14370	120	2407	2864	2096	108	116	54	99	96	0	4108	5142	3751	293	312	150	95	94	0	0	0	0	0	0	0	0	0	0	0	0	0	0	0	0	0	0	0	0.603	0.568	0.569	0.616	1.777	0.525	0.853	0.000	0.000	0.000	0.000	0.000	0.000	0.000	0.000	0.000	0.000	0.000	0.000	0.000	0.000	120	449	6114	7605	-0.731	Error	Error	2299	3815	0	0	2756	4849	0	0	0	0
3	13	3	""	"YER175C"	13390	14370	120	6821	6365	3083	112	127	70	100	100	0	3949	3591	1669	307	331	129	92	90	0	0	0	0	0	0	0	0	0	0	0	0	0	0	0	0	0	0	0	1.842	1.904	1.973	2.041	1.679	1.911	0.899	0.000	0.000	0.000	0.000	0.000	0.000	0.000	0.000	0.000	0.000	0.000	0.000	0.000	0.000	120	503	10351	9537	0.881	Error	Error	6709	3642	0	0	6253	3284	0	0	0	0
3	14	3	"RPL23B"	"YER117W"	13590	14370	120	7965	7426	3954	99	106	43	100	100	0	7090	6239	3561	297	313	126	95	90	0	0	0	0	0	0	0	0	0	0	0	0	0	0	0	0	0	0	0	1.158	1.233	1.278	1.506	1.839	1.184	0.905	0.000	0.000	0.000	0.000	0.000	0.000	0.000	0.000	0.000	0.000	0.000	0.000	0.000	0.000	120	558	14659	13269	0.212	Error	Error	7866	6793	0	0	7327	5942	0	0	0	0
3	15	3	"LSM5"	"YER146W"	13770	14370	110	961	906	498	103	111	55	90	86	0	926	914	504	307	321	127	75	75	0	0	0	0	0	0	0	0	0	0	0	0	0	0	0	0	0	0	0	1.386	1.323	1.217	1.278	1.502	1.165	0.755	0.000	0.000	0.000	0.000	0.000	0.000	0.000	0.000	0.000	0.000	0.000	0.000	0.000	0.000	80	489	1477	1410	0.471	Error	Error	858	619	0	0	803	607	0	0	0	0
3	16	3	"bmh1"	"YER177W"	13970	14370	120	9381	8633	4315	103	113	55	100	100	0	6819	6130	3230	298	316	122	94	92	0	0	0	0	0	0	0	0	0	0	0	0	0	0	0	0	0	0	0	1.423	1.463	1.482	1.665	1.683	1.399	0.934	0.000	0.000	0.000	0.000	0.000	0.000	0.000	0.000	0.000	0.000	0.000	0.000	0.000	0.000	120	579	15799	14362	0.509	Error	Error	9278	6521	0	0	8530	5832	0	0	0	0
3	17	3	"cup2"	"YGL166W"	14150	14380	110	4623	4352	2395	102	201	601	86	82	0	3274	3041	1578	290	401	577	83	83	0	0	0	0	0	0	0	0	0	0	0	0	0	0	0	0	0	0	0	1.515	1.545	1.492	1.491	1.587	1.534	0.889	0.000	0.000	0.000	0.000	0.000	0.000	0.000	0.000	0.000	0.000	0.000	0.000	0.000	0.000	80	494	7505	7001	0.599	Error	Error	4521	2984	0	0	4250	2751	0	0	0	0
3	18	3	""	"YGL198W"	14340	14370	110	4933	4288	2141	105	254	718	86	80	0	2900	2457	1254	301	434	611	80	76	0	0	0	0	0	0	0	0	0	0	0	0	0	0	0	0	0	0	0	1.858	1.940	1.887	2.039	1.608	1.843	0.883	0.000	0.000	0.000	0.000	0.000	0.000	0.000	0.000	0.000	0.000	0.000	0.000	0.000	0.000	80	505	7427	6339	0.893	Error	Error	4828	2599	0	0	4183	2156	0	0	0	0
3	19	3	"SAP4"	"YGL229C"	14540	14370	120	6425	6387	3446	109	171	421	98	89	0	6588	6165	3247	298	350	324	95	91	0	0	0	0	0	0	0	0	0	0	0	0	0	0	0	0	0	0	0	1.004	1.070	1.063	1.114	1.607	1.056	0.919	0.000	0.000	0.000	0.000	0.000	0.000	0.000	0.000	0.000	0.000	0.000	0.000	0.000	0.000	120	547	12606	12145	0.006	Error	Error	6316	6290	0	0	6278	5867	0	0	0	0
3	20	3	""	"YGL168W"	14720	14380	110	2534	2163	1007	109	144	211	86	83	0	5104	4517	2204	311	436	695	82	82	0	0	0	0	0	0	0	0	0	0	0	0	0	0	0	0	0	0	0	0.506	0.488	0.489	0.488	1.471	0.452	0.925	0.000	0.000	0.000	0.000	0.000	0.000	0.000	0.000	0.000	0.000	0.000	0.000	0.000	0.000	80	492	7218	6260	-0.983	Error	Error	2425	4793	0	0	2054	4206	0	0	0	0
3	21	3	"EMP24"	"YGL200C"	14920	14370	110	5119	4489	2426	124	203	313	87	82	0	2721	2496	1308	335	503	693	78	76	0	0	0	0	0	0	0	0	0	0	0	0	0	0	0	0	0	0	0	2.093	2.020	2.097	2.167	1.620	1.994	0.887	0.000	0.000	0.000	0.000	0.000	0.000	0.000	0.000	0.000	0.000	0.000	0.000	0.000	0.000	80	523	7381	6526	1.066	Error	Error	4995	2386	0	0	4365	2161	0	0	0	0
3	22	3	""	"YGL231C"	15110	14370	110	4711	4004	2072	130	207	291	87	83	0	8841	7785	3910	343	512	752	86	80	0	0	0	0	0	0	0	0	0	0	0	0	0	0	0	0	0	0	0	0.539	0.521	0.517	0.513	1.301	0.506	0.920	0.000	0.000	0.000	0.000	0.000	0.000	0.000	0.000	0.000	0.000	0.000	0.000	0.000	0.000	80	534	13079	11316	-0.891	Error	Error	4581	8498	0	0	3874	7442	0	0	0	0
3	1	4	""	"YGL170C"	11120	14560	110	5491	4860	2458	94	175	515	85	83	0	11279	9967	5003	276	537	1512	82	82	0	0	0	0	0	0	0	0	0	0	0	0	0	0	0	0	0	0	0	0.491	0.492	0.521	0.511	1.336	0.466	0.908	0.000	0.000	0.000	0.000	0.000	0.000	0.000	0.000	0.000	0.000	0.000	0.000	0.000	0.000	80	541	16400	14457	-1.028	Error	Error	5397	11003	0	0	4766	9691	0	0	0	0
3	2	4	"ARO8"	"YGL202W"	11310	14560	110	8582	8396	3613	114	284	828	100	96	0	15535	14731	4871	309	850	2305	100	95	0	0	0	0	0	0	0	0	0	0	0	0	0	0	0	0	0	0	0	0.556	0.574	0.565	0.540	1.316	0.583	0.923	0.000	0.000	0.000	0.000	0.000	0.000	0.000	0.000	0.000	0.000	0.000	0.000	0.000	0.000	80	506	23694	22704	-0.846	Error	Error	8468	15226	0	0	8282	14422	0	0	0	0
3	3	4	"SEC15"	"YGL233W"	11500	14560	110	4320	5085	3527	121	287	836	88	81	0	4444	4800	2905	315	689	1848	82	56	0	0	0	0	0	0	0	0	0	0	0	0	0	0	0	0	0	0	0	1.017	1.107	1.104	1.104	1.555	1.109	0.914	0.000	0.000	0.000	0.000	0.000	0.000	0.000	0.000	0.000	0.000	0.000	0.000	0.000	0.000	80	513	8328	9449	0.024	Error	Error	4199	4129	0	0	4964	4485	0	0	0	0
3	4	4	"NUP49"	"YGL172W"	11690	14560	110	8425	7644	3251	121	316	1008	98	85	0	4566	4198	1758	295	495	886	90	83	0	0	0	0	0	0	0	0	0	0	0	0	0	0	0	0	0	0	0	1.944	1.927	1.931	1.978	1.463	1.919	0.904	0.000	0.000	0.000	0.000	0.000	0.000	0.000	0.000	0.000	0.000	0.000	0.000	0.000	0.000	80	522	12575	11426	0.959	Error	Error	8304	4271	0	0	7523	3903	0	0	0	0
3	5	4	""	"YGL204C"	11880	14560	110	2286	2055	1120	109	246	875	77	70	0	2516	2261	1241	277	405	615	81	77	0	0	0	0	0	0	0	0	0	0	0	0	0	0	0	0	0	0	0	0.972	0.981	0.923	0.804	2.043	0.915	0.870	0.000	0.000	0.000	0.000	0.000	0.000	0.000	0.000	0.000	0.000	0.000	0.000	0.000	0.000	80	510	4416	3930	-0.041	Error	Error	2177	2239	0	0	1946	1984	0	0	0	0
3	6	4	""	"YGL235W"	12070	14560	110	4165	3865	2266	102	179	450	81	78	0	2982	2818	1661	273	376	517	80	77	0	0	0	0	0	0	0	0	0	0	0	0	0	0	0	0	0	0	0	1.500	1.479	1.468	1.404	1.515	1.352	0.897	0.000	0.000	0.000	0.000	0.000	0.000	0.000	0.000	0.000	0.000	0.000	0.000	0.000	0.000	80	520	6772	6308	0.585	Error	Error	4063	2709	0	0	3763	2545	0	0	0	0
3	7	4	"RTT102"	"YGR275W"	12270	14560	110	3851	3195	1590	96	189	498	82	81	0	2566	2264	1140	277	393	571	81	80	0	0	0	0	0	0	0	0	0	0	0	0	0	0	0	0	0	0	0	1.640	1.560	1.529	1.474	1.600	1.465	0.877	0.000	0.000	0.000	0.000	0.000	0.000	0.000	0.000	0.000	0.000	0.000	0.000	0.000	0.000	80	506	6044	5086	0.714	Error	Error	3755	2289	0	0	3099	1987	0	0	0	0
3	8	4	""	"YHL009W-B"	12450	14570	110	695	658	325	97	150	295	77	51	0	1978	1767	925	288	391	473	83	76	0	0	0	0	0	0	0	0	0	0	0	0	0	0	0	0	0	0	0	0.354	0.379	0.378	0.369	1.602	0.358	0.749	0.000	0.000	0.000	0.000	0.000	0.000	0.000	0.000	0.000	0.000	0.000	0.000	0.000	0.000	80	494	2288	2040	-1.499	Error	Error	598	1690	0	0	561	1479	0	0	0	0
3	9	4	""	"YHL041W"	12640	14560	110	3245	2859	1454	100	165	336	83	80	0	1841	1627	780	290	402	431	81	78	0	0	0	0	0	0	0	0	0	0	0	0	0	0	0	0	0	0	0	2.028	2.064	2.008	1.921	1.484	1.945	0.860	0.000	0.000	0.000	0.000	0.000	0.000	0.000	0.000	0.000	0.000	0.000	0.000	0.000	0.000	80	524	4696	4096	1.020	Error	Error	3145	1551	0	0	2759	1337	0	0	0	0
3	10	4	""	"YGR277C"	12860	14560	120	8362	7488	3863	105	151	299	95	92	0	4285	3957	1934	292	340	270	90	89	0	0	0	0	0	0	0	0	0	0	0	0	0	0	0	0	0	0	0	2.068	2.014	1.996	2.035	1.488	2.063	0.901	0.000	0.000	0.000	0.000	0.000	0.000	0.000	0.000	0.000	0.000	0.000	0.000	0.000	0.000	120	565	12250	11048	1.048	Error	Error	8257	3993	0	0	7383	3665	0	0	0	0
3	11	4	"PRS3"	"YHL011C"	13030	14570	110	7261	6814	3824	112	142	234	95	95	0	8163	7285	3903	303	371	583	93	90	0	0	0	0	0	0	0	0	0	0	0	0	0	0	0	0	0	0	0	0.910	0.960	0.983	0.963	1.574	0.935	0.904	0.000	0.000	0.000	0.000	0.000	0.000	0.000	0.000	0.000	0.000	0.000	0.000	0.000	0.000	80	444	15009	13684	-0.137	Error	Error	7149	7860	0	0	6702	6982	0	0	0	0
3	12	4	"ECM34"	"YHL043W"	13220	14560	120	4885	4373	2303	115	143	201	95	91	0	6785	5929	3348	306	376	529	86	82	0	0	0	0	0	0	0	0	0	0	0	0	0	0	0	0	0	0	0	0.736	0.757	0.751	0.855	1.971	0.703	0.911	0.000	0.000	0.000	0.000	0.000	0.000	0.000	0.000	0.000	0.000	0.000	0.000	0.000	0.000	120	553	11249	9881	-0.442	Error	Error	4770	6479	0	0	4258	5623	0	0	0	0
3	13	4	"SCW4"	"YGR279C"	13410	14560	110	7301	6275	3278	118	177	410	91	90	0	7155	6242	3143	308	431	758	87	83	0	0	0	0	0	0	0	0	0	0	0	0	0	0	0	0	0	0	0	1.049	1.038	1.039	1.081	1.612	1.010	0.914	0.000	0.000	0.000	0.000	0.000	0.000	0.000	0.000	0.000	0.000	0.000	0.000	0.000	0.000	80	496	14030	12091	0.069	Error	Error	7183	6847	0	0	6157	5934	0	0	0	0
3	14	4	""	"YHL013C"	13600	14560	110	6745	5878	2998	111	206	525	93	87	0	12450	10582	5702	306	563	1401	90	81	0	0	0	0	0	0	0	0	0	0	0	0	0	0	0	0	0	0	0	0.546	0.561	0.564	0.593	1.391	0.523	0.934	0.000	0.000	0.000	0.000	0.000	0.000	0.000	0.000	0.000	0.000	0.000	0.000	0.000	0.000	80	508	18778	16043	-0.872	Error	Error	6634	12144	0	0	5767	10276	0	0	0	0
3	15	4	""	"YHL045W"	13790	14560	110	22794	19469	11042	119	201	467	100	97	0	21495	17387	10143	318	571	1480	87	85	0	0	0	0	0	0	0	0	0	0	0	0	0	0	0	0	0	0	0	1.071	1.134	1.135	1.227	1.374	1.086	0.917	0.000	0.000	0.000	0.000	0.000	0.000	0.000	0.000	0.000	0.000	0.000	0.000	0.000	0.000	80	528	43852	36419	0.099	Error	Error	22675	21177	0	0	19350	17069	0	0	0	0
3	16	4	"YOR1"	"YGR281W"	13980	14560	110	1696	1639	1018	119	184	393	77	77	0	2615	2472	1470	330	486	997	77	58	0	0	0	0	0	0	0	0	0	0	0	0	0	0	0	0	0	0	0	0.690	0.710	0.715	0.714	1.630	0.646	0.820	0.000	0.000	0.000	0.000	0.000	0.000	0.000	0.000	0.000	0.000	0.000	0.000	0.000	0.000	80	499	3862	3662	-0.535	Error	Error	1577	2285	0	0	1520	2142	0	0	0	0
3	17	4	"RPS20"	"YHL015W"	14160	14570	110	2619	2267	1242	104	173	346	80	80	0	3554	2963	1714	311	445	626	76	72	0	0	0	0	0	0	0	0	0	0	0	0	0	0	0	0	0	0	0	0.776	0.816	0.798	0.806	1.829	0.754	0.878	0.000	0.000	0.000	0.000	0.000	0.000	0.000	0.000	0.000	0.000	0.000	0.000	0.000	0.000	80	501	5758	4815	-0.367	Error	Error	2515	3243	0	0	2163	2652	0	0	0	0
3	18	4	""	"YHL047C"	14360	14570	120	5447	5283	3309	106	184	473	87	83	0	6753	6323	4076	305	414	592	82	79	0	0	0	0	0	0	0	0	0	0	0	0	0	0	0	0	0	0	0	0.828	0.860	0.843	0.934	1.913	0.822	0.920	0.000	0.000	0.000	0.000	0.000	0.000	0.000	0.000	0.000	0.000	0.000	0.000	0.000	0.000	120	597	11789	11195	-0.272	Error	Error	5341	6448	0	0	5177	6018	0	0	0	0
3	19	4	""	"YIL077C"	14550	14560	110	7518	6502	3790	110	146	243	88	83	0	11252	9602	5629	311	407	718	80	77	0	0	0	0	0	0	0	0	0	0	0	0	0	0	0	0	0	0	0	0.677	0.688	0.713	0.785	2.109	0.653	0.932	0.000	0.000	0.000	0.000	0.000	0.000	0.000	0.000	0.000	0.000	0.000	0.000	0.000	0.000	80	492	18349	15683	-0.563	Error	Error	7408	10941	0	0	6392	9291	0	0	0	0
3	20	4	"SEC24"	"YIL109C"	14750	14570	120	7841	6857	3575	109	141	234	95	90	0	9833	8694	4783	308	415	754	85	83	0	0	0	0	0	0	0	0	0	0	0	0	0	0	0	0	0	0	0	0.812	0.805	0.832	1.044	2.494	0.782	0.931	0.000	0.000	0.000	0.000	0.000	0.000	0.000	0.000	0.000	0.000	0.000	0.000	0.000	0.000	120	544	17257	15134	-0.301	Error	Error	7732	9525	0	0	6748	8386	0	0	0	0
3	21	4	""	"YIL141W"	14930	14560	110	4584	3686	2014	126	249	556	78	78	0	3798	3126	1679	332	492	754	77	76	0	0	0	0	0	0	0	0	0	0	0	0	0	0	0	0	0	0	0	1.286	1.274	1.219	1.070	2.141	1.247	0.901	0.000	0.000	0.000	0.000	0.000	0.000	0.000	0.000	0.000	0.000	0.000	0.000	0.000	0.000	80	495	7924	6354	0.363	Error	Error	4458	3466	0	0	3560	2794	0	0	0	0
3	22	4	""	"YIL079C"	15130	14570	120	6464	5472	2659	132	229	463	91	89	0	5843	5232	2644	342	499	723	86	80	0	0	0	0	0	0	0	0	0	0	0	0	0	0	0	0	0	0	0	1.151	1.092	1.084	1.130	1.713	1.058	0.901	0.000	0.000	0.000	0.000	0.000	0.000	0.000	0.000	0.000	0.000	0.000	0.000	0.000	0.000	120	603	11833	10230	0.203	Error	Error	6332	5501	0	0	5340	4890	0	0	0	0
3	1	5	"COX5b"	"YIL111W"	11140	14750	110	4719	4274	2597	94	127	288	82	78	0	4744	4076	2358	282	358	687	77	76	0	0	0	0	0	0	0	0	0	0	0	0	0	0	0	0	0	0	0	1.037	1.102	1.120	1.164	1.686	1.063	0.907	0.000	0.000	0.000	0.000	0.000	0.000	0.000	0.000	0.000	0.000	0.000	0.000	0.000	0.000	80	545	9087	7974	0.052	Error	Error	4625	4462	0	0	4180	3794	0	0	0	0
3	2	5	"SSL2"	"YIL143C"	11330	14750	110	7263	7268	4103	107	200	657	95	91	0	9129	8983	4461	297	485	1167	93	86	0	0	0	0	0	0	0	0	0	0	0	0	0	0	0	0	0	0	0	0.810	0.824	0.820	0.774	1.398	0.840	0.877	0.000	0.000	0.000	0.000	0.000	0.000	0.000	0.000	0.000	0.000	0.000	0.000	0.000	0.000	80	501	15988	15847	-0.304	Error	Error	7156	8832	0	0	7161	8686	0	0	0	0
3	3	5	""	"YIL082W"	11510	14750	110	28589	24513	13145	129	476	2256	87	81	0	20397	17641	8944	322	782	2602	82	81	0	0	0	0	0	0	0	0	0	0	0	0	0	0	0	0	0	0	0	1.418	1.408	1.424	1.441	1.571	1.401	0.927	0.000	0.000	0.000	0.000	0.000	0.000	0.000	0.000	0.000	0.000	0.000	0.000	0.000	0.000	80	500	48535	41703	0.504	Error	Error	28460	20075	0	0	24384	17319	0	0	0	0
3	4	5	""	"YIL113W"	11700	14760	110	3913	3400	1734	129	500	2261	75	22	0	2729	2431	1190	304	727	2491	46	0	0	0	0	0	0	0	0	0	0	0	0	0	0	0	0	0	0	0	0	1.560	1.538	1.494	1.482	1.422	1.551	0.905	0.000	0.000	0.000	0.000	0.000	0.000	0.000	0.000	0.000	0.000	0.000	0.000	0.000	0.000	80	508	6209	5398	0.642	Error	Error	3784	2425	0	0	3271	2127	0	0	0	0
3	5	5	""	"YIL145C"	11890	14750	110	8995	7902	4101	115	377	1312	83	80	0	4619	4002	2013	296	479	764	85	82	0	0	0	0	0	0	0	0	0	0	0	0	0	0	0	0	0	0	0	2.054	2.101	2.043	2.163	1.833	2.167	0.883	0.000	0.000	0.000	0.000	0.000	0.000	0.000	0.000	0.000	0.000	0.000	0.000	0.000	0.000	80	532	13203	11493	1.039	Error	Error	8880	4323	0	0	7787	3706	0	0	0	0
3	6	5	""	"YIL083C"	12080	14750	110	5596	4601	2344	111	391	1359	80	76	0	3538	3080	1473	287	483	814	80	77	0	0	0	0	0	0	0	0	0	0	0	0	0	0	0	0	0	0	0	1.687	1.608	1.621	1.689	1.612	1.594	0.908	0.000	0.000	0.000	0.000	0.000	0.000	0.000	0.000	0.000	0.000	0.000	0.000	0.000	0.000	80	496	8736	7283	0.755	Error	Error	5485	3251	0	0	4490	2793	0	0	0	0
3	7	5	"NUP159"	"YIL115C"	12270	14760	120	734	748	433	96	177	501	64	20	0	931	946	534	272	354	477	68	29	0	0	0	0	0	0	0	0	0	0	0	0	0	0	0	0	0	0	0	0.968	0.967	0.896	0.850	1.791	0.870	0.810	0.000	0.000	0.000	0.000	0.000	0.000	0.000	0.000	0.000	0.000	0.000	0.000	0.000	0.000	120	513	1297	1326	-0.047	Error	Error	638	659	0	0	652	674	0	0	0	0
3	8	5	"SLN1"	"YIL147C"	12450	14760	120	6444	6177	3490	96	103	48	100	100	0	7775	7359	4395	280	293	122	98	95	0	0	0	0	0	0	0	0	0	0	0	0	0	0	0	0	0	0	0	0.847	0.859	0.854	0.970	1.938	0.820	0.873	0.000	0.000	0.000	0.000	0.000	0.000	0.000	0.000	0.000	0.000	0.000	0.000	0.000	0.000	120	487	13843	13160	-0.240	Error	Error	6348	7495	0	0	6081	7079	0	0	0	0
3	9	5	""	"YJR015W"	12640	14760	120	4275	3972	2005	106	136	247	96	91	0	16061	14481	7835	312	341	194	100	99	0	0	0	0	0	0	0	0	0	0	0	0	0	0	0	0	0	0	0	0.265	0.273	0.272	0.286	1.653	0.255	0.914	0.000	0.000	0.000	0.000	0.000	0.000	0.000	0.000	0.000	0.000	0.000	0.000	0.000	0.000	120	510	19918	18035	-1.917	Error	Error	4169	15749	0	0	3866	14169	0	0	0	0
3	10	5	"ANB1"	"YJR047C"	12830	14760	120	4417	3693	1869	107	113	44	97	96	0	6068	5122	2642	294	319	121	93	88	0	0	0	0	0	0	0	0	0	0	0	0	0	0	0	0	0	0	0	0.746	0.743	0.748	0.792	1.858	0.712	0.906	0.000	0.000	0.000	0.000	0.000	0.000	0.000	0.000	0.000	0.000	0.000	0.000	0.000	0.000	120	501	10084	8414	-0.422	Error	Error	4310	5774	0	0	3586	4828	0	0	0	0
3	11	5	""	"YJR079W"	13020	14760	120	539	543	292	106	110	42	89	83	0	834	770	393	285	299	98	76	75	0	0	0	0	0	0	0	0	0	0	0	0	0	0	0	0	0	0	0	0.789	0.901	0.780	0.803	1.835	0.767	0.672	0.000	0.000	0.000	0.000	0.000	0.000	0.000	0.000	0.000	0.000	0.000	0.000	0.000	0.000	120	495	982	922	-0.342	Error	Error	433	549	0	0	437	485	0	0	0	0
3	12	5	"ess1"	"YJR017C"	13210	14760	120	3224	2699	1367	104	110	46	94	92	0	2830	2510	1268	288	307	116	85	83	0	0	0	0	0	0	0	0	0	0	0	0	0	0	0	0	0	0	0	1.227	1.168	1.154	1.170	1.946	1.146	0.894	0.000	0.000	0.000	0.000	0.000	0.000	0.000	0.000	0.000	0.000	0.000	0.000	0.000	0.000	120	491	5662	4817	0.296	Error	Error	3120	2542	0	0	2595	2222	0	0	0	0
3	13	5	"UTR1"	"YJR049C"	13380	14750	110	6323	5768	3327	108	276	958	80	77	0	5587	4985	2849	307	509	1071	80	77	0	0	0	0	0	0	0	0	0	0	0	0	0	0	0	0	0	0	0	1.177	1.210	1.232	1.290	1.678	1.145	0.915	0.000	0.000	0.000	0.000	0.000	0.000	0.000	0.000	0.000	0.000	0.000	0.000	0.000	0.000	80	463	11495	10338	0.235	Error	Error	6215	5280	0	0	5660	4678	0	0	0	0
3	14	5	""	"YJR082C"	13580	14760	120	4612	3858	1879	105	248	873	83	78	0	2871	2416	1255	307	504	1146	75	60	0	0	0	0	0	0	0	0	0	0	0	0	0	0	0	0	0	0	0	1.758	1.780	1.795	1.770	1.695	1.686	0.868	0.000	0.000	0.000	0.000	0.000	0.000	0.000	0.000	0.000	0.000	0.000	0.000	0.000	0.000	120	571	7071	5862	0.814	Error	Error	4507	2564	0	0	3753	2109	0	0	0	0
3	15	5	"TES1"	"YJR019C"	13770	14750	110	5422	4600	2542	109	209	620	80	77	0	4262	3607	2067	304	418	642	78	76	0	0	0	0	0	0	0	0	0	0	0	0	0	0	0	0	0	0	0	1.342	1.360	1.355	1.326	2.037	1.278	0.907	0.000	0.000	0.000	0.000	0.000	0.000	0.000	0.000	0.000	0.000	0.000	0.000	0.000	0.000	80	494	9271	7794	0.425	Error	Error	5313	3958	0	0	4491	3303	0	0	0	0
3	16	5	"osm1"	"YJR051W"	13960	14750	110	10802	9121	4921	111	297	994	81	77	0	7116	5738	3265	315	537	1053	77	73	0	0	0	0	0	0	0	0	0	0	0	0	0	0	0	0	0	0	0	1.572	1.661	1.656	1.969	1.841	1.610	0.889	0.000	0.000	0.000	0.000	0.000	0.000	0.000	0.000	0.000	0.000	0.000	0.000	0.000	0.000	80	499	17492	14433	0.653	Error	Error	10691	6801	0	0	9010	5423	0	0	0	0
3	17	5	""	"YJR084W"	14140	14750	110	6330	5298	2959	102	348	1201	80	76	0	4245	3485	2067	302	542	1080	76	68	0	0	0	0	0	0	0	0	0	0	0	0	0	0	0	0	0	0	0	1.580	1.632	1.630	1.935	2.132	1.549	0.842	0.000	0.000	0.000	0.000	0.000	0.000	0.000	0.000	0.000	0.000	0.000	0.000	0.000	0.000	80	487	10171	8379	0.659	Error	Error	6228	3943	0	0	5196	3183	0	0	0	0
3	18	5	"rec107"	"YJR021C"	14330	14750	110	6564	5466	2986	106	375	1154	82	78	0	5466	4618	2669	297	569	1023	78	71	0	0	0	0	0	0	0	0	0	0	0	0	0	0	0	0	0	0	0	1.249	1.240	1.235	1.449	1.988	1.201	0.919	0.000	0.000	0.000	0.000	0.000	0.000	0.000	0.000	0.000	0.000	0.000	0.000	0.000	0.000	80	483	11627	9681	0.321	Error	Error	6458	5169	0	0	5360	4321	0	0	0	0
3	19	5	"BFA1"	"YJR053W"	14520	14750	110	5340	4765	2667	113	293	845	81	78	0	3637	3001	1735	305	517	932	73	70	0	0	0	0	0	0	0	0	0	0	0	0	0	0	0	0	0	0	0	1.569	1.726	1.641	1.808	1.746	1.662	0.874	0.000	0.000	0.000	0.000	0.000	0.000	0.000	0.000	0.000	0.000	0.000	0.000	0.000	0.000	80	509	8559	7348	0.650	Error	Error	5227	3332	0	0	4652	2696	0	0	0	0
3	20	5	"ste18"	"YJR086W"	14720	14750	120	2226	1906	1014	105	171	446	83	74	0	1550	1385	767	294	360	440	73	65	0	0	0	0	0	0	0	0	0	0	0	0	0	0	0	0	0	0	0	1.689	1.651	1.630	1.711	1.717	1.553	0.833	0.000	0.000	0.000	0.000	0.000	0.000	0.000	0.000	0.000	0.000	0.000	0.000	0.000	0.000	120	528	3377	2892	0.756	Error	Error	2121	1256	0	0	1801	1091	0	0	0	0
3	21	5	""	"YKR007W"	14900	14750	110	5710	4581	2390	115	256	749	83	78	0	7350	5877	3317	297	547	1217	80	70	0	0	0	0	0	0	0	0	0	0	0	0	0	0	0	0	0	0	0	0.793	0.800	0.811	0.911	1.884	0.756	0.900	0.000	0.000	0.000	0.000	0.000	0.000	0.000	0.000	0.000	0.000	0.000	0.000	0.000	0.000	80	460	12648	10046	-0.334	Error	Error	5595	7053	0	0	4466	5580	0	0	0	0
3	22	5	""	"YKR038C"	15090	14750	120	5370	4686	2370	119	246	696	90	83	0	3188	2885	1534	310	529	1094	77	60	0	0	0	0	0	0	0	0	0	0	0	0	0	0	0	0	0	0	0	1.825	1.774	1.770	2.051	2.183	1.558	0.783	0.000	0.000	0.000	0.000	0.000	0.000	0.000	0.000	0.000	0.000	0.000	0.000	0.000	0.000	120	592	8129	7142	0.868	Error	Error	5251	2878	0	0	4567	2575	0	0	0	0
3	1	6	""	"YKR070W"	11110	14940	120	5993	5118	2501	94	106	99	100	99	0	20326	17573	8481	292	314	191	99	99	0	0	0	0	0	0	0	0	0	0	0	0	0	0	0	0	0	0	0	0.294	0.291	0.284	0.286	1.486	0.271	0.900	0.000	0.000	0.000	0.000	0.000	0.000	0.000	0.000	0.000	0.000	0.000	0.000	0.000	0.000	120	610	25933	22305	-1.764	Error	Error	5899	20034	0	0	5024	17281	0	0	0	0
3	2	6	"FOX2"	"YKR009C"	11300	14940	120	6102	6098	3042	103	143	440	99	95	0	22461	21552	9761	309	364	546	99	99	0	0	0	0	0	0	0	0	0	0	0	0	0	0	0	0	0	0	0	0.271	0.282	0.287	0.276	1.474	0.277	0.915	0.000	0.000	0.000	0.000	0.000	0.000	0.000	0.000	0.000	0.000	0.000	0.000	0.000	0.000	120	544	28151	27238	-1.885	Error	Error	5999	22152	0	0	5995	21243	0	0	0	0
3	3	6	""	"YKR040C"	11490	14940	120	4421	3586	1833	107	298	1821	76	65	0	3548	2899	1632	316	509	1723	70	39	0	0	0	0	0	0	0	0	0	0	0	0	0	0	0	0	0	0	0	1.335	1.347	1.367	1.410	1.749	1.271	0.872	0.000	0.000	0.000	0.000	0.000	0.000	0.000	0.000	0.000	0.000	0.000	0.000	0.000	0.000	120	522	7546	6062	0.417	Error	Error	4314	3232	0	0	3479	2583	0	0	0	0
3	4	6	"sis2"	"YKR072C"	11680	14940	120	9645	9502	3823	106	147	332	100	100	0	7748	7677	2955	286	339	530	99	99	0	0	0	0	0	0	0	0	0	0	0	0	0	0	0	0	0	0	0	1.278	1.271	1.284	1.277	1.366	1.302	0.886	0.000	0.000	0.000	0.000	0.000	0.000	0.000	0.000	0.000	0.000	0.000	0.000	0.000	0.000	120	500	17001	16787	0.354	Error	Error	9539	7462	0	0	9396	7391	0	0	0	0
3	5	6	""	"YKR011C"	11850	14940	110	4892	4079	1981	112	195	632	92	81	0	4242	3691	1717	283	387	609	87	82	0	0	0	0	0	0	0	0	0	0	0	0	0	0	0	0	0	0	0	1.207	1.164	1.163	1.203	1.580	1.131	0.908	0.000	0.000	0.000	0.000	0.000	0.000	0.000	0.000	0.000	0.000	0.000	0.000	0.000	0.000	80	467	8739	7375	0.272	Error	Error	4780	3959	0	0	3967	3408	0	0	0	0
3	6	6	"UTH1"	"YKR042W"	12050	14940	120	5255	4376	1849	113	245	820	92	85	0	5960	5365	2008	293	416	651	97	95	0	0	0	0	0	0	0	0	0	0	0	0	0	0	0	0	0	0	0	0.907	0.840	0.856	0.819	1.475	0.841	0.914	0.000	0.000	0.000	0.000	0.000	0.000	0.000	0.000	0.000	0.000	0.000	0.000	0.000	0.000	120	573	10809	9335	-0.140	Error	Error	5142	5667	0	0	4263	5072	0	0	0	0
3	7	6	""	"YKR074W"	12240	14940	120	2995	2497	1173	101	136	322	91	85	0	3136	2728	1386	284	315	278	86	80	0	0	0	0	0	0	0	0	0	0	0	0	0	0	0	0	0	0	0	1.015	0.980	0.974	1.069	2.123	0.904	0.885	0.000	0.000	0.000	0.000	0.000	0.000	0.000	0.000	0.000	0.000	0.000	0.000	0.000	0.000	120	504	5746	4840	0.021	Error	Error	2894	2852	0	0	2396	2444	0	0	0	0
3	8	6	"PRY2"	"YKR013W"	12430	14940	120	6624	5823	2723	104	108	41	100	100	0	6648	5871	2638	293	305	92	98	97	0	0	0	0	0	0	0	0	0	0	0	0	0	0	0	0	0	0	0	1.026	1.025	1.022	0.993	1.378	1.003	0.930	0.000	0.000	0.000	0.000	0.000	0.000	0.000	0.000	0.000	0.000	0.000	0.000	0.000	0.000	120	502	12875	11297	0.037	Error	Error	6520	6355	0	0	5719	5578	0	0	0	0
3	9	6	""	"YKR044W"	12630	14940	120	8784	7760	3821	115	121	43	100	99	0	12837	11901	5380	319	334	102	99	98	0	0	0	0	0	0	0	0	0	0	0	0	0	0	0	0	0	0	0	0.693	0.660	0.667	0.650	1.469	0.655	0.934	0.000	0.000	0.000	0.000	0.000	0.000	0.000	0.000	0.000	0.000	0.000	0.000	0.000	0.000	120	495	21187	19227	-0.530	Error	Error	8669	12518	0	0	7645	11582	0	0	0	0
3	10	6	"ECM4"	"YKR076W"	12810	14940	120	8754	7234	3271	107	115	49	100	100	0	5013	4607	2041	298	323	125	99	98	0	0	0	0	0	0	0	0	0	0	0	0	0	0	0	0	0	0	0	1.834	1.654	1.627	1.700	1.604	1.656	0.891	0.000	0.000	0.000	0.000	0.000	0.000	0.000	0.000	0.000	0.000	0.000	0.000	0.000	0.000	120	492	13362	11436	0.875	Error	Error	8647	4715	0	0	7127	4309	0	0	0	0
3	11	6	"CRR1"	"YLR213C"	13010	14940	120	7340	6563	2764	103	109	48	100	100	0	4009	3773	1373	285	305	118	100	99	0	0	0	0	0	0	0	0	0	0	0	0	0	0	0	0	0	0	0	1.943	1.852	1.869	1.837	1.399	1.929	0.907	0.000	0.000	0.000	0.000	0.000	0.000	0.000	0.000	0.000	0.000	0.000	0.000	0.000	0.000	120	495	10961	9948	0.959	Error	Error	7237	3724	0	0	6460	3488	0	0	0	0
3	12	6	""	"YLR243W"	13190	14940	120	624	594	285	107	117	50	87	84	0	1041	992	512	293	311	120	81	79	0	0	0	0	0	0	0	0	0	0	0	0	0	0	0	0	0	0	0	0.691	0.697	0.667	0.684	1.854	0.599	0.731	0.000	0.000	0.000	0.000	0.000	0.000	0.000	0.000	0.000	0.000	0.000	0.000	0.000	0.000	120	492	1265	1186	-0.533	Error	Error	517	748	0	0	487	699	0	0	0	0
3	13	6	"PIG1"	"YLR273C"	13390	14940	120	4517	5073	3575	104	199	755	89	83	0	3613	3946	2658	295	395	752	79	76	0	0	0	0	0	0	0	0	0	0	0	0	0	0	0	0	0	0	0	1.330	1.361	1.339	1.551	2.038	1.367	0.901	0.000	0.000	0.000	0.000	0.000	0.000	0.000	0.000	0.000	0.000	0.000	0.000	0.000	0.000	120	534	7731	8620	0.411	Error	Error	4413	3318	0	0	4969	3651	0	0	0	0
3	14	6	""	"YLR215C"	13570	14940	120	6418	5865	2801	102	112	57	100	100	0	8735	8015	3449	302	319	153	100	100	0	0	0	0	0	0	0	0	0	0	0	0	0	0	0	0	0	0	0	0.749	0.747	0.753	0.733	1.359	0.740	0.922	0.000	0.000	0.000	0.000	0.000	0.000	0.000	0.000	0.000	0.000	0.000	0.000	0.000	0.000	120	480	14749	13476	-0.417	Error	Error	6316	8433	0	0	5763	7713	0	0	0	0
3	15	6	"CDD1"	"YLR245C"	13760	14940	120	2208	2102	1212	103	154	469	84	72	0	2112	2045	1451	301	354	431	77	67	0	0	0	0	0	0	0	0	0	0	0	0	0	0	0	0	0	0	0	1.162	1.146	1.151	1.280	1.734	0.993	0.769	0.000	0.000	0.000	0.000	0.000	0.000	0.000	0.000	0.000	0.000	0.000	0.000	0.000	0.000	120	534	3916	3743	0.217	Error	Error	2105	1811	0	0	1999	1744	0	0	0	0
3	16	6	"SMD2"	"YLR275W"	13950	14940	120	3811	3170	1761	103	167	696	83	74	0	12171	10764	6820	294	363	638	95	90	0	0	0	0	0	0	0	0	0	0	0	0	0	0	0	0	0	0	0	0.312	0.293	0.288	0.314	1.638	0.264	0.916	0.000	0.000	0.000	0.000	0.000	0.000	0.000	0.000	0.000	0.000	0.000	0.000	0.000	0.000	120	541	15585	13537	-1.679	Error	Error	3708	11877	0	0	3067	10470	0	0	0	0
3	17	6	""	"YLR217W"	14140	14940	120	3723	3175	1709	101	159	522	85	80	0	2486	2062	1169	292	344	411	78	70	0	0	0	0	0	0	0	0	0	0	0	0	0	0	0	0	0	0	0	1.651	1.737	1.666	1.913	1.807	1.631	0.891	0.000	0.000	0.000	0.000	0.000	0.000	0.000	0.000	0.000	0.000	0.000	0.000	0.000	0.000	120	552	5816	4844	0.723	Error	Error	3622	2194	0	0	3074	1770	0	0	0	0
3	18	6	""	"YLR247C"	14340	14940	120	1223	1380	930	102	154	468	80	56	0	1659	1794	1214	285	348	469	79	62	0	0	0	0	0	0	0	0	0	0	0	0	0	0	0	0	0	0	0	0.816	0.847	0.885	0.886	1.930	0.788	0.823	0.000	0.000	0.000	0.000	0.000	0.000	0.000	0.000	0.000	0.000	0.000	0.000	0.000	0.000	120	551	2495	2787	-0.294	Error	Error	1121	1374	0	0	1278	1509	0	0	0	0
3	19	6	"YSH1"	"YLR277C"	14530	14940	120	3669	4141	3034	109	141	292	94	88	0	3273	3626	2590	296	336	285	86	80	0	0	0	0	0	0	0	0	0	0	0	0	0	0	0	0	0	0	0	1.196	1.211	1.203	1.290	1.878	1.169	0.909	0.000	0.000	0.000	0.000	0.000	0.000	0.000	0.000	0.000	0.000	0.000	0.000	0.000	0.000	120	551	6537	7362	0.258	Error	Error	3560	2977	0	0	4032	3330	0	0	0	0
3	20	6	""	"YLR219W"	14730	14940	120	6611	6329	3411	105	113	46	100	100	0	4894	4658	2472	295	307	115	99	97	0	0	0	0	0	0	0	0	0	0	0	0	0	0	0	0	0	0	0	1.415	1.427	1.435	1.449	1.605	1.448	0.906	0.000	0.000	0.000	0.000	0.000	0.000	0.000	0.000	0.000	0.000	0.000	0.000	0.000	0.000	120	514	11105	10587	0.500	Error	Error	6506	4599	0	0	6224	4363	0	0	0	0
3	21	6	"yef3"	"YLR249W"	14910	14940	120	2999	3302	2147	109	155	413	92	88	0	4059	4297	2745	296	373	624	90	84	0	0	0	0	0	0	0	0	0	0	0	0	0	0	0	0	0	0	0	0.768	0.798	0.827	0.819	1.779	0.771	0.882	0.000	0.000	0.000	0.000	0.000	0.000	0.000	0.000	0.000	0.000	0.000	0.000	0.000	0.000	120	535	6653	7194	-0.381	Error	Error	2890	3763	0	0	3193	4001	0	0	0	0
3	22	6	""	"YLR279W"	15110	14940	120	754	681	357	101	108	48	87	83	0	752	709	389	289	301	106	77	70	0	0	0	0	0	0	0	0	0	0	0	0	0	0	0	0	0	0	0	1.410	1.381	1.208	1.175	2.704	1.119	0.631	0.000	0.000	0.000	0.000	0.000	0.000	0.000	0.000	0.000	0.000	0.000	0.000	0.000	0.000	120	610	1116	1000	0.496	Error	Error	653	463	0	0	580	420	0	0	0	0
3	1	7	"BUL2"	"YML111W"	11110	15120	110	10049	9280	4419	97	171	611	100	97	0	7939	7164	3300	294	402	770	93	90	0	0	0	0	0	0	0	0	0	0	0	0	0	0	0	0	0	0	0	1.302	1.337	1.369	1.382	1.315	1.305	0.901	0.000	0.000	0.000	0.000	0.000	0.000	0.000	0.000	0.000	0.000	0.000	0.000	0.000	0.000	80	538	17597	16053	0.380	Error	Error	9952	7645	0	0	9183	6870	0	0	0	0
3	2	7	""	"YMR009W"	11300	15130	110	3846	3326	1847	102	249	790	83	76	0	2985	2484	1425	294	477	901	72	70	0	0	0	0	0	0	0	0	0	0	0	0	0	0	0	0	0	0	0	1.391	1.472	1.447	1.555	1.712	1.437	0.853	0.000	0.000	0.000	0.000	0.000	0.000	0.000	0.000	0.000	0.000	0.000	0.000	0.000	0.000	80	504	6435	5414	0.476	Error	Error	3744	2691	0	0	3224	2190	0	0	0	0
3	3	7	""	"YMR040W"	11500	15130	120	3711	3180	1567	102	176	470	88	83	0	3069	2645	1322	289	371	455	85	79	0	0	0	0	0	0	0	0	0	0	0	0	0	0	0	0	0	0	0	1.298	1.306	1.296	1.293	1.820	1.278	0.878	0.000	0.000	0.000	0.000	0.000	0.000	0.000	0.000	0.000	0.000	0.000	0.000	0.000	0.000	120	555	6389	5434	0.377	Error	Error	3609	2780	0	0	3078	2356	0	0	0	0
3	4	7	"DAT1"	"YML113W"	11690	15130	120	9020	7400	3858	101	110	68	100	99	0	5290	4372	2504	280	298	164	92	87	0	0	0	0	0	0	0	0	0	0	0	0	0	0	0	0	0	0	0	1.780	1.784	1.809	1.974	1.754	1.715	0.886	0.000	0.000	0.000	0.000	0.000	0.000	0.000	0.000	0.000	0.000	0.000	0.000	0.000	0.000	120	516	13929	11391	0.832	Error	Error	8919	5010	0	0	7299	4092	0	0	0	0
3	5	7	"HXT2"	"YMR011W"	11880	15130	120	10600	9461	5136	109	146	327	94	90	0	13438	11340	6659	285	339	424	89	85	0	0	0	0	0	0	0	0	0	0	0	0	0	0	0	0	0	0	0	0.798	0.846	0.835	0.970	2.038	0.796	0.908	0.000	0.000	0.000	0.000	0.000	0.000	0.000	0.000	0.000	0.000	0.000	0.000	0.000	0.000	120	552	23644	20407	-0.326	Error	Error	10491	13153	0	0	9352	11055	0	0	0	0
3	6	7	"arg80"	"YMR042W"	12080	15140	120	3623	3081	1556	106	112	43	97	95	0	2754	2347	1196	284	295	101	86	86	0	0	0	0	0	0	0	0	0	0	0	0	0	0	0	0	0	0	0	1.424	1.442	1.419	1.565	1.759	1.407	0.891	0.000	0.000	0.000	0.000	0.000	0.000	0.000	0.000	0.000	0.000	0.000	0.000	0.000	0.000	120	531	5987	5038	0.510	Error	Error	3517	2470	0	0	2975	2063	0	0	0	0
3	7	7	"van1"	"YML115C"	12270	15140	120	9034	7347	3511	99	101	35	100	100	0	14409	12422	5768	274	281	87	100	99	0	0	0	0	0	0	0	0	0	0	0	0	0	0	0	0	0	0	0	0.632	0.597	0.603	0.602	1.541	0.587	0.918	0.000	0.000	0.000	0.000	0.000	0.000	0.000	0.000	0.000	0.000	0.000	0.000	0.000	0.000	120	516	23070	19396	-0.662	Error	Error	8935	14135	0	0	7248	12148	0	0	0	0
3	8	7	"sec59"	"YMR013C"	12460	15140	120	6303	5592	2858	105	109	40	100	100	0	16542	15465	7080	296	309	104	99	98	0	0	0	0	0	0	0	0	0	0	0	0	0	0	0	0	0	0	0	0.382	0.362	0.360	0.350	1.648	0.350	0.906	0.000	0.000	0.000	0.000	0.000	0.000	0.000	0.000	0.000	0.000	0.000	0.000	0.000	0.000	120	518	22444	20656	-1.390	Error	Error	6198	16246	0	0	5487	15169	0	0	0	0
3	9	7	""	"YMR044W"	12650	15140	120	8566	7410	3563	105	113	43	100	100	0	20526	18586	9309	305	326	115	99	99	0	0	0	0	0	0	0	0	0	0	0	0	0	0	0	0	0	0	0	0.418	0.400	0.391	0.409	1.700	0.372	0.894	0.000	0.000	0.000	0.000	0.000	0.000	0.000	0.000	0.000	0.000	0.000	0.000	0.000	0.000	120	514	28682	25586	-1.257	Error	Error	8461	20221	0	0	7305	18281	0	0	0	0
3	10	7	""	"YML117W"	12840	15140	120	5698	6370	3974	98	106	48	100	100	0	5155	5260	3187	289	307	110	96	95	0	0	0	0	0	0	0	0	0	0	0	0	0	0	0	0	0	0	0	1.151	1.262	1.290	1.368	1.718	1.246	0.887	0.000	0.000	0.000	0.000	0.000	0.000	0.000	0.000	0.000	0.000	0.000	0.000	0.000	0.000	120	518	10466	11243	0.203	Error	Error	5600	4866	0	0	6272	4971	0	0	0	0
3	11	7	"ERG5"	"YMR015C"	13030	15140	120	7726	6801	3373	105	119	65	100	100	0	19239	17084	8152	302	326	133	100	100	0	0	0	0	0	0	0	0	0	0	0	0	0	0	0	0	0	0	0	0.402	0.399	0.407	0.395	1.455	0.386	0.900	0.000	0.000	0.000	0.000	0.000	0.000	0.000	0.000	0.000	0.000	0.000	0.000	0.000	0.000	120	514	26558	23478	-1.313	Error	Error	7621	18937	0	0	6696	16782	0	0	0	0
3	12	7	""	"YMR046C"	13220	15140	120	42472	38480	20082	121	135	67	100	100	7	31589	29254	14498	323	344	129	100	99	0	0	0	0	0	0	0	0	0	0	0	0	0	0	0	0	0	0	0	1.355	1.326	1.311	1.371	1.879	1.353	0.912	0.000	0.000	0.000	0.000	0.000	0.000	0.000	0.000	0.000	0.000	0.000	0.000	0.000	0.000	120	532	73617	67290	0.438	Error	Error	42351	31266	0	0	38359	28931	0	0	0	0
3	13	7	"PBI2"	"YNL015W"	13420	15140	120	920	814	400	105	118	60	88	85	0	1387	1265	638	299	313	116	83	80	0	0	0	0	0	0	0	0	0	0	0	0	0	0	0	0	0	0	0	0.749	0.734	0.730	0.671	1.820	0.672	0.795	0.000	0.000	0.000	0.000	0.000	0.000	0.000	0.000	0.000	0.000	0.000	0.000	0.000	0.000	120	510	1903	1675	-0.417	Error	Error	815	1088	0	0	709	966	0	0	0	0
3	14	7	""	"YNL047C"	13600	15140	120	6285	5732	3111	97	104	47	99	99	0	7752	7154	4149	286	299	106	96	95	0	0	0	0	0	0	0	0	0	0	0	0	0	0	0	0	0	0	0	0.829	0.820	0.838	0.974	1.987	0.768	0.892	0.000	0.000	0.000	0.000	0.000	0.000	0.000	0.000	0.000	0.000	0.000	0.000	0.000	0.000	120	500	13654	12503	-0.271	Error	Error	6188	7466	0	0	5635	6868	0	0	0	0
3	15	7	""	"YNL078W"	13790	15140	120	6393	5721	3315	100	106	44	98	98	0	3419	2995	1820	283	293	90	85	84	0	0	0	0	0	0	0	0	0	0	0	0	0	0	0	0	0	0	0	2.007	2.073	2.092	2.181	1.719	2.016	0.892	0.000	0.000	0.000	0.000	0.000	0.000	0.000	0.000	0.000	0.000	0.000	0.000	0.000	0.000	120	523	9429	8333	1.005	Error	Error	6293	3136	0	0	5621	2712	0	0	0	0
3	16	7	""	"YNL017C"	13970	15130	110	4700	3973	2325	104	149	313	83	80	0	5466	4600	2657	284	364	511	77	76	0	0	0	0	0	0	0	0	0	0	0	0	0	0	0	0	0	0	0	0.887	0.896	0.899	1.000	1.928	0.883	0.910	0.000	0.000	0.000	0.000	0.000	0.000	0.000	0.000	0.000	0.000	0.000	0.000	0.000	0.000	80	473	9778	8185	-0.173	Error	Error	4596	5182	0	0	3869	4316	0	0	0	0
3	17	7	"SFB2"	"YNL049C"	14170	15140	120	6124	6447	3920	106	143	291	100	97	0	5177	5392	3162	289	360	475	95	87	0	0	0	0	0	0	0	0	0	0	0	0	0	0	0	0	0	0	0	1.231	1.243	1.271	1.270	1.495	1.233	0.896	0.000	0.000	0.000	0.000	0.000	0.000	0.000	0.000	0.000	0.000	0.000	0.000	0.000	0.000	120	552	10906	11444	0.300	Error	Error	6018	4888	0	0	6341	5103	0	0	0	0
3	18	7	""	"YNL080C"	14360	15140	120	5967	4958	2429	111	116	42	100	100	0	6943	6028	3098	300	314	99	98	97	0	0	0	0	0	0	0	0	0	0	0	0	0	0	0	0	0	0	0	0.882	0.846	0.842	0.896	1.727	0.804	0.927	0.000	0.000	0.000	0.000	0.000	0.000	0.000	0.000	0.000	0.000	0.000	0.000	0.000	0.000	120	516	12499	10575	-0.182	Error	Error	5856	6643	0	0	4847	5728	0	0	0	0
3	19	7	""	"YNL019C"	14550	15140	120	8944	7852	4253	122	140	140	98	96	0	6651	5675	2908	318	343	202	93	91	0	0	0	0	0	0	0	0	0	0	0	0	0	0	0	0	0	0	0	1.393	1.443	1.495	1.504	1.650	1.431	0.908	0.000	0.000	0.000	0.000	0.000	0.000	0.000	0.000	0.000	0.000	0.000	0.000	0.000	0.000	120	538	15155	13087	0.478	Error	Error	8822	6333	0	0	7730	5357	0	0	0	0
3	20	7	""	"YNL051W"	14750	15140	120	4357	3814	1875	121	141	146	97	93	0	13024	11229	5315	330	359	210	99	95	0	0	0	0	0	0	0	0	0	0	0	0	0	0	0	0	0	0	0	0.334	0.339	0.348	0.328	1.685	0.337	0.922	0.000	0.000	0.000	0.000	0.000	0.000	0.000	0.000	0.000	0.000	0.000	0.000	0.000	0.000	120	539	16930	14592	-1.583	Error	Error	4236	12694	0	0	3693	10899	0	0	0	0
3	21	7	"pms1"	"YNL082W"	14940	15140	120	4378	4800	2637	114	122	52	100	100	0	12308	12490	6902	328	347	130	100	100	0	0	0	0	0	0	0	0	0	0	0	0	0	0	0	0	0	0	0	0.356	0.385	0.389	0.384	1.501	0.371	0.891	0.000	0.000	0.000	0.000	0.000	0.000	0.000	0.000	0.000	0.000	0.000	0.000	0.000	0.000	120	499	16244	16848	-1.490	Error	Error	4264	11980	0	0	4686	12162	0	0	0	0
3	22	7	"HDA1"	"YNL021W"	15120	15140	120	5775	5084	2752	101	109	48	97	95	0	5173	4510	2577	296	314	108	89	89	0	0	0	0	0	0	0	0	0	0	0	0	0	0	0	0	0	0	0	1.163	1.182	1.183	1.259	1.890	1.130	0.877	0.000	0.000	0.000	0.000	0.000	0.000	0.000	0.000	0.000	0.000	0.000	0.000	0.000	0.000	120	569	10551	9197	0.218	Error	Error	5674	4877	0	0	4983	4214	0	0	0	0
3	1	8	"MSG5"	"YNL053W"	11120	15320	110	7551	6529	3737	92	284	1153	82	75	0	6714	5562	3367	274	490	1190	76	73	0	0	0	0	0	0	0	0	0	0	0	0	0	0	0	0	0	0	0	1.158	1.217	1.234	1.444	1.918	1.146	0.911	0.000	0.000	0.000	0.000	0.000	0.000	0.000	0.000	0.000	0.000	0.000	0.000	0.000	0.000	80	574	13899	11725	0.212	Error	Error	7459	6440	0	0	6437	5288	0	0	0	0
3	2	8	"END3"	"YNL084C"	11330	15330	120	6136	5992	4456	98	298	1140	74	68	0	15442	14835	12657	281	503	1172	74	70	0	0	0	0	0	0	0	0	0	0	0	0	0	0	0	0	0	0	0	0.398	0.405	0.427	0.531	2.363	0.359	0.898	0.000	0.000	0.000	0.000	0.000	0.000	0.000	0.000	0.000	0.000	0.000	0.000	0.000	0.000	120	582	21199	20448	-1.328	Error	Error	6038	15161	0	0	5894	14554	0	0	0	0
3	3	8	"BIO5"	"YNR056C"	11510	15320	110	7837	6833	4020	101	264	989	81	80	0	4704	4365	2400	291	430	800	81	78	0	0	0	0	0	0	0	0	0	0	0	0	0	0	0	0	0	0	0	1.753	1.652	1.692	1.868	1.959	1.601	0.894	0.000	0.000	0.000	0.000	0.000	0.000	0.000	0.000	0.000	0.000	0.000	0.000	0.000	0.000	80	478	12149	10806	0.810	Error	Error	7736	4413	0	0	6732	4074	0	0	0	0
3	4	8	"PLB3"	"YOL011W"	11710	15330	120	5443	5454	3052	98	238	927	90	80	0	5678	5724	3320	283	404	749	90	82	0	0	0	0	0	0	0	0	0	0	0	0	0	0	0	0	0	0	0	0.991	0.984	0.982	1.068	1.713	0.940	0.904	0.000	0.000	0.000	0.000	0.000	0.000	0.000	0.000	0.000	0.000	0.000	0.000	0.000	0.000	120	542	10740	10797	-0.013	Error	Error	5345	5395	0	0	5356	5441	0	0	0	0
3	5	8	""	"YOL042W"	11900	15330	120	6124	5382	2599	101	127	280	98	95	0	13244	11328	5743	278	346	663	97	95	0	0	0	0	0	0	0	0	0	0	0	0	0	0	0	0	0	0	0	0.465	0.478	0.475	0.484	1.602	0.452	0.910	0.000	0.000	0.000	0.000	0.000	0.000	0.000	0.000	0.000	0.000	0.000	0.000	0.000	0.000	120	521	18989	16331	-1.106	Error	Error	6023	12966	0	0	5281	11050	0	0	0	0
3	6	8	"BIO3"	"YNR058W"	12090	15330	120	4919	4468	2341	98	108	65	98	97	0	4495	4234	2237	269	291	117	90	88	0	0	0	0	0	0	0	0	0	0	0	0	0	0	0	0	0	0	0	1.141	1.102	1.151	1.268	1.922	1.090	0.886	0.000	0.000	0.000	0.000	0.000	0.000	0.000	0.000	0.000	0.000	0.000	0.000	0.000	0.000	120	505	9047	8335	0.190	Error	Error	4821	4226	0	0	4370	3965	0	0	0	0
3	7	8	"HRD1"	"YOL013C"	12280	15330	120	8834	7951	4058	90	107	190	100	100	0	7135	6189	2970	266	293	317	97	95	0	0	0	0	0	0	0	0	0	0	0	0	0	0	0	0	0	0	0	1.273	1.327	1.348	1.286	1.418	1.353	0.915	0.000	0.000	0.000	0.000	0.000	0.000	0.000	0.000	0.000	0.000	0.000	0.000	0.000	0.000	120	505	15613	13784	0.348	Error	Error	8744	6869	0	0	7861	5923	0	0	0	0
3	8	8	"PEX15"	"YOL044W"	12470	15330	120	3582	3473	2062	98	144	523	87	80	0	9445	8946	5241	282	422	1376	83	80	0	0	0	0	0	0	0	0	0	0	0	0	0	0	0	0	0	0	0	0.380	0.390	0.395	0.402	1.642	0.372	0.912	0.000	0.000	0.000	0.000	0.000	0.000	0.000	0.000	0.000	0.000	0.000	0.000	0.000	0.000	120	489	12647	12039	-1.395	Error	Error	3484	9163	0	0	3375	8664	0	0	0	0
3	9	8	"FRE4"	"YNR060W"	12650	15330	120	4668	4615	2739	102	146	526	92	85	0	6643	6876	4165	290	337	424	96	91	0	0	0	0	0	0	0	0	0	0	0	0	0	0	0	0	0	0	0	0.719	0.685	0.670	0.694	1.603	0.653	0.919	0.000	0.000	0.000	0.000	0.000	0.000	0.000	0.000	0.000	0.000	0.000	0.000	0.000	0.000	120	487	10919	11099	-0.477	Error	Error	4566	6353	0	0	4513	6586	0	0	0	0
3	10	8	""	"YOL014W"	12840	15330	120	1226	1067	532	94	100	46	90	90	0	3217	2876	1544	278	291	99	87	85	0	0	0	0	0	0	0	0	0	0	0	0	0	0	0	0	0	0	0	0.385	0.375	0.355	0.380	1.932	0.343	0.869	0.000	0.000	0.000	0.000	0.000	0.000	0.000	0.000	0.000	0.000	0.000	0.000	0.000	0.000	120	496	4071	3571	-1.376	Error	Error	1132	2939	0	0	973	2598	0	0	0	0
3	11	8	""	"YOL046C"	13040	15330	120	5549	4807	2650	99	116	128	97	94	0	4285	3577	2005	285	337	460	80	77	0	0	0	0	0	0	0	0	0	0	0	0	0	0	0	0	0	0	0	1.362	1.430	1.461	1.675	1.926	1.398	0.880	0.000	0.000	0.000	0.000	0.000	0.000	0.000	0.000	0.000	0.000	0.000	0.000	0.000	0.000	120	519	9450	8000	0.446	Error	Error	5450	4000	0	0	4708	3292	0	0	0	0
3	12	8	""	"YNR062C"	13230	15330	120	4053	3999	2315	107	135	295	95	86	0	3000	2731	1494	293	322	257	85	80	0	0	0	0	0	0	0	0	0	0	0	0	0	0	0	0	0	0	0	1.458	1.596	1.588	1.593	1.945	1.618	0.885	0.000	0.000	0.000	0.000	0.000	0.000	0.000	0.000	0.000	0.000	0.000	0.000	0.000	0.000	120	484	6653	6330	0.544	Error	Error	3946	2707	0	0	3892	2438	0	0	0	0
3	13	8	"CMK2"	"YOL016C"	13410	15330	120	3248	3179	2109	103	151	437	85	80	0	5239	5027	3739	285	354	499	78	75	0	0	0	0	0	0	0	0	0	0	0	0	0	0	0	0	0	0	0	0.635	0.649	0.633	0.837	2.226	0.586	0.910	0.000	0.000	0.000	0.000	0.000	0.000	0.000	0.000	0.000	0.000	0.000	0.000	0.000	0.000	120	508	8099	7818	-0.656	Error	Error	3145	4954	0	0	3076	4742	0	0	0	0
3	14	8	""	"YOL048C"	13610	15330	120	4187	3417	1850	100	182	784	81	75	0	8023	6628	3626	283	379	754	81	80	0	0	0	0	0	0	0	0	0	0	0	0	0	0	0	0	0	0	0	0.528	0.523	0.526	0.575	1.719	0.516	0.923	0.000	0.000	0.000	0.000	0.000	0.000	0.000	0.000	0.000	0.000	0.000	0.000	0.000	0.000	120	498	11827	9662	-0.921	Error	Error	4087	7740	0	0	3317	6345	0	0	0	0
3	15	8	"spr1"	"YOR190W"	13790	15330	120	7977	7057	3338	97	105	47	100	100	0	5826	5024	2643	284	299	100	94	92	0	0	0	0	0	0	0	0	0	0	0	0	0	0	0	0	0	0	0	1.422	1.468	1.485	1.721	2.011	1.386	0.896	0.000	0.000	0.000	0.000	0.000	0.000	0.000	0.000	0.000	0.000	0.000	0.000	0.000	0.000	120	467	13422	11700	0.508	Error	Error	7880	5542	0	0	6960	4740	0	0	0	0
3	16	8	""	"YOR220W"	13980	15330	120	6736	5548	2787	99	132	286	98	91	0	4967	4115	2083	287	334	371	90	83	0	0	0	0	0	0	0	0	0	0	0	0	0	0	0	0	0	0	0	1.418	1.423	1.436	1.497	1.699	1.377	0.905	0.000	0.000	0.000	0.000	0.000	0.000	0.000	0.000	0.000	0.000	0.000	0.000	0.000	0.000	120	502	11317	9277	0.504	Error	Error	6637	4680	0	0	5449	3828	0	0	0	0
3	17	8	""	"YOR252W"	14170	15330	120	4865	3853	2105	100	105	41	98	95	0	3828	3232	1834	285	298	98	87	85	0	0	0	0	0	0	0	0	0	0	0	0	0	0	0	0	0	0	0	1.345	1.273	1.262	1.309	1.880	1.196	0.893	0.000	0.000	0.000	0.000	0.000	0.000	0.000	0.000	0.000	0.000	0.000	0.000	0.000	0.000	120	450	8308	6700	0.428	Error	Error	4765	3543	0	0	3753	2947	0	0	0	0
3	18	8	""	"YOR192C"	14360	15330	120	10568	9865	5298	107	112	42	100	100	0	12566	11345	6348	293	311	99	100	99	0	0	0	0	0	0	0	0	0	0	0	0	0	0	0	0	0	0	0	0.852	0.883	0.896	0.942	1.597	0.842	0.926	0.000	0.000	0.000	0.000	0.000	0.000	0.000	0.000	0.000	0.000	0.000	0.000	0.000	0.000	120	443	22734	20810	-0.230	Error	Error	10461	12273	0	0	9758	11052	0	0	0	0
3	19	8	""	"YOR222W"	14530	15320	110	5534	4571	2430	117	270	816	78	77	0	3488	3001	1539	302	423	580	82	77	0	0	0	0	0	0	0	0	0	0	0	0	0	0	0	0	0	0	0	1.700	1.650	1.663	1.660	1.622	1.657	0.908	0.000	0.000	0.000	0.000	0.000	0.000	0.000	0.000	0.000	0.000	0.000	0.000	0.000	0.000	80	420	8603	7153	0.766	Error	Error	5417	3186	0	0	4454	2699	0	0	0	0
3	20	8	"SEC63"	"YOR254C"	14720	15320	110	1963	1954	1333	137	319	805	75	61	0	1868	1889	1241	329	495	621	76	63	0	0	0	0	0	0	0	0	0	0	0	0	0	0	0	0	0	0	0	1.186	1.165	1.067	1.010	2.137	1.076	0.816	0.000	0.000	0.000	0.000	0.000	0.000	0.000	0.000	0.000	0.000	0.000	0.000	0.000	0.000	80	476	3365	3377	0.247	Error	Error	1826	1539	0	0	1817	1560	0	0	0	0
3	21	8	""	"YOR192C-B"	14930	15330	120	5660	5169	2934	130	188	292	95	88	0	8405	7989	4562	335	414	339	94	89	0	0	0	0	0	0	0	0	0	0	0	0	0	0	0	0	0	0	0	0.685	0.658	0.656	0.699	1.607	0.623	0.879	0.000	0.000	0.000	0.000	0.000	0.000	0.000	0.000	0.000	0.000	0.000	0.000	0.000	0.000	120	486	13600	12693	-0.545	Error	Error	5530	8070	0	0	5039	7654	0	0	0	0
3	22	8	"rpb8"	"YOR224C"	15110	15330	120	3978	3234	1734	108	115	50	96	94	0	2825	2397	1325	302	321	113	84	83	0	0	0	0	0	0	0	0	0	0	0	0	0	0	0	0	0	0	0	1.534	1.492	1.464	1.657	2.012	1.436	0.896	0.000	0.000	0.000	0.000	0.000	0.000	0.000	0.000	0.000	0.000	0.000	0.000	0.000	0.000	120	521	6393	5221	0.617	Error	Error	3870	2523	0	0	3126	2095	0	0	0	0
3	1	9	""	"YOR256C"	11120	15520	120	9815	9232	5166	92	167	708	98	92	0	7020	6195	3554	266	337	661	90	84	0	0	0	0	0	0	0	0	0	0	0	0	0	0	0	0	0	0	0	1.440	1.542	1.516	1.631	1.699	1.516	0.895	0.000	0.000	0.000	0.000	0.000	0.000	0.000	0.000	0.000	0.000	0.000	0.000	0.000	0.000	120	570	16477	15069	0.526	Error	Error	9723	6754	0	0	9140	5929	0	0	0	0
3	2	9	"TOA1"	"YOR194C"	11310	15520	120	8139	6501	3500	92	98	41	100	100	0	4681	3932	2161	267	279	85	95	90	0	0	0	0	0	0	0	0	0	0	0	0	0	0	0	0	0	0	0	1.823	1.749	1.812	1.995	1.865	1.717	0.900	0.000	0.000	0.000	0.000	0.000	0.000	0.000	0.000	0.000	0.000	0.000	0.000	0.000	0.000	120	450	12461	10074	0.866	Error	Error	8047	4414	0	0	6409	3665	0	0	0	0
3	3	9	"ISU2"	"YOR226C"	11480	15510	110	3961	3408	2070	93	241	732	80	73	0	2404	2071	1230	278	394	522	77	68	0	0	0	0	0	0	0	0	0	0	0	0	0	0	0	0	0	0	0	1.819	1.849	1.847	1.747	1.986	1.785	0.844	0.000	0.000	0.000	0.000	0.000	0.000	0.000	0.000	0.000	0.000	0.000	0.000	0.000	0.000	80	457	5994	5108	0.863	Error	Error	3868	2126	0	0	3315	1793	0	0	0	0
3	4	9	""	"YOR258W"	11690	15520	120	3906	3408	1974	94	202	587	85	79	0	3348	2897	1792	278	364	442	79	73	0	0	0	0	0	0	0	0	0	0	0	0	0	0	0	0	0	0	0	1.242	1.265	1.246	1.364	1.822	1.207	0.871	0.000	0.000	0.000	0.000	0.000	0.000	0.000	0.000	0.000	0.000	0.000	0.000	0.000	0.000	120	496	6882	5933	0.312	Error	Error	3812	3070	0	0	3314	2619	0	0	0	0
3	5	9	"MRPL40"	"YPL173W"	11860	15510	110	8441	6735	3675	98	298	1137	82	77	0	9371	8007	4035	272	603	1770	85	77	0	0	0	0	0	0	0	0	0	0	0	0	0	0	0	0	0	0	0	0.917	0.858	0.857	0.805	1.479	0.852	0.894	0.000	0.000	0.000	0.000	0.000	0.000	0.000	0.000	0.000	0.000	0.000	0.000	0.000	0.000	80	421	17442	14372	-0.125	Error	Error	8343	9099	0	0	6637	7735	0	0	0	0
3	6	9	"HRR25"	"YPL204W"	12050	15510	110	595	564	288	97	296	1082	1	0	0	865	796	461	270	599	1686	1	0	0	0	0	0	0	0	0	0	0	0	0	0	0	0	0	0	0	0	0	0.837	0.888	0.805	0.749	2.192	0.446	0.547	0.000	0.000	0.000	0.000	0.000	0.000	0.000	0.000	0.000	0.000	0.000	0.000	0.000	0.000	80	467	1093	993	-0.257	Error	Error	498	595	0	0	467	526	0	0	0	0
3	7	9	""	"YPL236C"	12240	15510	110	5997	5136	3030	90	188	550	85	81	0	4974	4336	2440	274	394	666	82	80	0	0	0	0	0	0	0	0	0	0	0	0	0	0	0	0	0	0	0	1.257	1.242	1.257	1.295	1.810	1.238	0.854	0.000	0.000	0.000	0.000	0.000	0.000	0.000	0.000	0.000	0.000	0.000	0.000	0.000	0.000	80	499	10607	9108	0.330	Error	Error	5907	4700	0	0	5046	4062	0	0	0	0
3	8	9	"spt14"	"YPL175W"	12430	15510	110	10823	8632	4418	99	405	1481	86	78	0	17268	14571	6575	288	891	2869	87	83	0	0	0	0	0	0	0	0	0	0	0	0	0	0	0	0	0	0	0	0.632	0.597	0.581	0.545	1.454	0.590	0.902	0.000	0.000	0.000	0.000	0.000	0.000	0.000	0.000	0.000	0.000	0.000	0.000	0.000	0.000	80	499	27704	22816	-0.663	Error	Error	10724	16980	0	0	8533	14283	0	0	0	0
3	9	9	""	"YPL206C"	12620	15510	110	8320	6772	3594	109	525	1776	80	73	0	5110	4303	2039	294	961	2910	72	15	0	0	0	0	0	0	0	0	0	0	0	0	0	0	0	0	0	0	0	1.705	1.662	1.632	1.573	1.424	1.700	0.811	0.000	0.000	0.000	0.000	0.000	0.000	0.000	0.000	0.000	0.000	0.000	0.000	0.000	0.000	80	493	13027	10672	0.770	Error	Error	8211	4816	0	0	6663	4009	0	0	0	0
3	10	9	""	"YPL238C"	12820	15510	120	2267	1863	997	97	270	1097	71	49	0	1679	1528	851	274	413	773	69	41	0	0	0	0	0	0	0	0	0	0	0	0	0	0	0	0	0	0	0	1.544	1.408	1.369	1.377	2.056	1.265	0.805	0.000	0.000	0.000	0.000	0.000	0.000	0.000	0.000	0.000	0.000	0.000	0.000	0.000	0.000	120	534	3575	3020	0.627	Error	Error	2170	1405	0	0	1766	1254	0	0	0	0
3	11	9	"CUP9"	"YPL177C"	13000	15510	110	4841	4150	2017	98	163	383	97	91	0	8265	7143	3658	282	456	1049	87	82	0	0	0	0	0	0	0	0	0	0	0	0	0	0	0	0	0	0	0	0.594	0.591	0.594	0.660	1.730	0.554	0.901	0.000	0.000	0.000	0.000	0.000	0.000	0.000	0.000	0.000	0.000	0.000	0.000	0.000	0.000	80	468	12726	10913	-0.751	Error	Error	4743	7983	0	0	4052	6861	0	0	0	0
3	12	9	""	"YPL208W"	13190	15510	110	8747	7501	3717	102	318	1093	93	81	0	4197	3708	1757	289	545	1150	80	76	0	0	0	0	0	0	0	0	0	0	0	0	0	0	0	0	0	0	0	2.212	2.164	2.247	2.297	1.560	2.243	0.872	0.000	0.000	0.000	0.000	0.000	0.000	0.000	0.000	0.000	0.000	0.000	0.000	0.000	0.000	80	487	12553	10818	1.145	Error	Error	8645	3908	0	0	7399	3419	0	0	0	0
3	13	9	"hsp82"	"YPL240C"	13370	15510	110	6448	6504	3189	100	381	1268	93	87	0	5832	5520	2584	287	541	1012	93	85	0	0	0	0	0	0	0	0	0	0	0	0	0	0	0	0	0	0	0	1.145	1.224	1.239	1.240	1.443	1.215	0.840	0.000	0.000	0.000	0.000	0.000	0.000	0.000	0.000	0.000	0.000	0.000	0.000	0.000	0.000	80	507	11893	11637	0.195	Error	Error	6348	5545	0	0	6404	5233	0	0	0	0
3	14	9	"PPQ1"	"YPL179W"	13570	15510	110	12333	9800	5013	101	499	1752	87	76	0	7131	6122	2921	287	681	1504	87	76	0	0	0	0	0	0	0	0	0	0	0	0	0	0	0	0	0	0	0	1.787	1.662	1.603	1.622	1.454	1.697	0.893	0.000	0.000	0.000	0.000	0.000	0.000	0.000	0.000	0.000	0.000	0.000	0.000	0.000	0.000	80	508	19076	15534	0.838	Error	Error	12232	6844	0	0	9699	5835	0	0	0	0
3	15	9	"SRP72"	"YPL210C"	13770	15510	120	3871	3935	2826	91	362	1570	75	60	0	2346	2381	1543	298	530	1244	68	42	0	0	0	0	0	0	0	0	0	0	0	0	0	0	0	0	0	0	0	1.846	1.845	1.862	1.916	1.860	1.853	0.841	0.000	0.000	0.000	0.000	0.000	0.000	0.000	0.000	0.000	0.000	0.000	0.000	0.000	0.000	120	536	5828	5927	0.884	Error	Error	3780	2048	0	0	3844	2083	0	0	0	0
3	16	9	"IQG1"	"YPL242C"	13970	15510	120	1066	1078	638	85	93	44	95	92	0	1544	1558	917	290	305	102	87	85	0	0	0	0	0	0	0	0	0	0	0	0	0	0	0	0	0	0	0	0.782	0.783	0.826	0.865	2.051	0.702	0.706	0.000	0.000	0.000	0.000	0.000	0.000	0.000	0.000	0.000	0.000	0.000	0.000	0.000	0.000	120	475	2235	2261	-0.354	Error	Error	981	1254	0	0	993	1268	0	0	0	0
3	17	9	"EMPTY"	"EMPTY"	14150	15510	150	104	121	81	87	93	38	33	18	0	287	325	177	276	287	94	26	14	0	0	0	0	0	0	0	0	0	0	0	0	0	0	0	0	0	0	0	1.545	0.694	0.444	0.449	3.715	0.235	0.205	0.000	0.000	0.000	0.000	0.000	0.000	0.000	0.000	0.000	0.000	0.000	0.000	0.000	0.000	156	538	28	83	0.628	Error	Error	17	11	0	0	34	49	0	0	-75	0
3	18	9	"EMPTY"	"EMPTY"	14340	15510	150	110	133	91	93	108	92	17	7	0	287	331	208	281	315	243	9	5	0	0	0	0	0	0	0	0	0	0	0	0	0	0	0	0	0	0	0	2.833	0.800	0.442	0.449	4.251	0.219	0.184	0.000	0.000	0.000	0.000	0.000	0.000	0.000	0.000	0.000	0.000	0.000	0.000	0.000	0.000	156	541	23	90	1.503	Error	Error	17	6	0	0	40	50	0	0	-75	0
3	19	9	"EMPTY"	"EMPTY"	14530	15510	150	126	177	127	101	223	716	0	0	0	326	407	265	287	399	543	7	0	0	0	0	0	0	0	0	0	0	0	0	0	0	0	0	0	0	0	0	0.641	0.633	0.590	0.580	3.509	1.572	0.635	0.000	0.000	0.000	0.000	0.000	0.000	0.000	0.000	0.000	0.000	0.000	0.000	0.000	0.000	156	557	64	196	-0.642	Error	Error	25	39	0	0	76	120	0	0	-75	0
3	20	9	"EMPTY"	"EMPTY"	14720	15510	150	126	147	88	108	234	672	0	0	0	311	346	182	296	399	474	3	0	0	0	0	0	0	0	0	0	0	0	0	0	0	0	0	0	0	0	0	1.200	0.780	0.457	0.472	3.669	0.690	0.423	0.000	0.000	0.000	0.000	0.000	0.000	0.000	0.000	0.000	0.000	0.000	0.000	0.000	0.000	156	621	33	89	0.263	Error	Error	18	15	0	0	39	50	0	0	-75	0
3	21	9	"EMPTY"	"EMPTY"	14920	15510	150	128	146	87	106	142	216	4	0	0	297	356	219	296	339	247	15	5	0	0	0	0	0	0	0	0	0	0	0	0	0	0	0	0	0	0	0	22.000	0.667	0.366	0.394	3.100	0.257	0.275	0.000	0.000	0.000	0.000	0.000	0.000	0.000	0.000	0.000	0.000	0.000	0.000	0.000	0.000	156	577	23	100	4.459	Error	Error	22	1	0	0	40	60	0	0	-75	0
3	22	9	"EMPTY"	"EMPTY"	15110	15510	150	116	144	92	101	118	137	15	4	0	298	342	204	291	312	146	19	10	0	0	0	0	0	0	0	0	0	0	0	0	0	0	0	0	0	0	0	2.143	0.843	0.485	0.463	3.302	0.262	0.239	0.000	0.000	0.000	0.000	0.000	0.000	0.000	0.000	0.000	0.000	0.000	0.000	0.000	0.000	156	772	22	94	1.100	Error	Error	15	7	0	0	43	51	0	0	-75	0
3	1	10	"EMPTY"	"EMPTY"	11110	15700	150	94	119	85	80	85	35	35	20	0	282	306	155	269	272	80	29	12	0	0	0	0	0	0	0	0	0	0	0	0	0	0	0	0	0	0	0	1.077	1.054	0.476	0.470	3.579	0.271	0.177	0.000	0.000	0.000	0.000	0.000	0.000	0.000	0.000	0.000	0.000	0.000	0.000	0.000	0.000	156	775	27	76	0.107	Error	Error	14	13	0	0	39	37	0	0	-75	0
3	2	10	"EMPTY"	"EMPTY"	11300	15700	150	98	119	69	85	91	38	32	20	0	287	316	165	275	283	84	30	12	0	0	0	0	0	0	0	0	0	0	0	0	0	0	0	0	0	0	0	1.083	0.829	0.352	0.358	3.481	0.192	0.158	0.000	0.000	0.000	0.000	0.000	0.000	0.000	0.000	0.000	0.000	0.000	0.000	0.000	0.000	156	534	25	75	0.115	Error	Error	13	12	0	0	34	41	0	0	-75	0
3	3	10	"EMPTY"	"EMPTY"	11490	15700	150	95	120	78	86	186	550	0	0	0	283	318	184	282	360	405	5	0	0	0	0	0	0	0	0	0	0	0	0	0	0	0	0	0	0	0	0	9.000	0.944	0.482	0.424	3.302	1.529	0.545	0.000	0.000	0.000	0.000	0.000	0.000	0.000	0.000	0.000	0.000	0.000	0.000	0.000	0.000	156	599	10	70	3.170	Error	Error	9	1	0	0	34	36	0	0	-75	0
3	4	10	"EMPTY"	"EMPTY"	11680	15700	150	95	121	79	87	164	457	0	0	0	273	314	168	287	372	509	4	0	0	0	0	0	0	0	0	0	0	0	0	0	0	0	0	0	0	0	0	-0.571	1.259	0.477	0.444	3.397	0.217	0.181	0.000	0.000	0.000	0.000	0.000	0.000	0.000	0.000	0.000	0.000	0.000	0.000	0.000	0.000	156	617	-6	61	Error	Error	Error	8	-14	0	0	34	27	0	0	-75	0
3	5	10	"EMPTY"	"EMPTY"	11870	15700	150	90	107	66	92	229	929	0	0	0	286	296	143	289	546	1499	0	0	0	0	0	0	0	0	0	0	0	0	0	0	0	0	0	0	0	0	0	0.667	2.143	0.472	0.558	4.312	0.657	0.856	0.000	0.000	0.000	0.000	0.000	0.000	0.000	0.000	0.000	0.000	0.000	0.000	0.000	0.000	156	640	-5	22	-0.585	Error	Error	-2	-3	0	0	15	7	0	0	-75	0
3	6	10	"EMPTY"	"EMPTY"	12060	15700	150	96	121	81	92	245	968	0	0	0	269	307	205	282	499	1296	0	0	0	0	0	0	0	0	0	0	0	0	0	0	0	0	0	0	0	0	0	-0.308	1.160	0.334	0.362	4.497	0.334	0.345	0.000	0.000	0.000	0.000	0.000	0.000	0.000	0.000	0.000	0.000	0.000	0.000	0.000	0.000	156	739	-9	54	Error	Error	Error	4	-13	0	0	29	25	0	0	-75	0
3	7	10	""	"iYBL030C-0"	12260	15700	110	5148	4551	2626	88	184	565	87	77	0	2926	2784	1513	276	353	500	82	77	0	0	0	0	0	0	0	0	0	0	0	0	0	0	0	0	0	0	0	1.909	1.780	1.770	1.820	1.751	1.694	0.884	0.000	0.000	0.000	0.000	0.000	0.000	0.000	0.000	0.000	0.000	0.000	0.000	0.000	0.000	80	529	7710	6971	0.933	Error	Error	5060	2650	0	0	4463	2508	0	0	0	0
3	8	10	""	"iYBL027W"	12470	15710	120	6030	5546	2950	96	275	1071	90	78	0	5531	4981	2379	279	558	1978	81	62	0	0	0	0	0	0	0	0	0	0	0	0	0	0	0	0	0	0	0	1.130	1.159	1.112	1.117	1.600	1.161	0.900	0.000	0.000	0.000	0.000	0.000	0.000	0.000	0.000	0.000	0.000	0.000	0.000	0.000	0.000	120	578	11186	10152	0.176	Error	Error	5934	5252	0	0	5450	4702	0	0	0	0
3	9	10	""	"iYBL023C"	12640	15700	110	2356	1998	1227	99	194	641	71	67	0	2288	1870	1180	273	368	554	71	65	0	0	0	0	0	0	0	0	0	0	0	0	0	0	0	0	0	0	0	1.120	1.189	1.129	1.226	1.648	1.104	0.893	0.000	0.000	0.000	0.000	0.000	0.000	0.000	0.000	0.000	0.000	0.000	0.000	0.000	0.000	80	488	4272	3496	0.164	Error	Error	2257	2015	0	0	1899	1597	0	0	0	0
3	10	10	""	"iYBL009W"	12840	15710	120	2799	2482	1228	90	124	210	97	90	0	4333	3918	1892	260	311	315	96	90	0	0	0	0	0	0	0	0	0	0	0	0	0	0	0	0	0	0	0	0.665	0.654	0.650	0.655	1.633	0.638	0.926	0.000	0.000	0.000	0.000	0.000	0.000	0.000	0.000	0.000	0.000	0.000	0.000	0.000	0.000	120	551	6782	6050	-0.588	Error	Error	2709	4073	0	0	2392	3658	0	0	0	0
3	11	10	""	"iYBL005W"	13030	15710	120	4426	3702	2275	92	130	279	93	86	0	5565	4690	2938	269	347	615	80	73	0	0	0	0	0	0	0	0	0	0	0	0	0	0	0	0	0	0	0	0.818	0.817	0.829	0.972	2.095	0.785	0.904	0.000	0.000	0.000	0.000	0.000	0.000	0.000	0.000	0.000	0.000	0.000	0.000	0.000	0.000	120	582	9630	8031	-0.289	Error	Error	4334	5296	0	0	3610	4421	0	0	0	0
3	12	10	""	"iYBL003C"	13230	15710	120	1526	1688	1282	88	168	676	66	53	0	4419	4385	3140	265	319	372	79	76	0	0	0	0	0	0	0	0	0	0	0	0	0	0	0	0	0	0	0	0.346	0.388	0.401	0.402	2.137	0.390	0.899	0.000	0.000	0.000	0.000	0.000	0.000	0.000	0.000	0.000	0.000	0.000	0.000	0.000	0.000	120	578	5592	5720	-1.530	Error	Error	1438	4154	0	0	1600	4120	0	0	0	0
3	13	10	""	"iYBRCdelta11"	13410	15710	110	189	206	120	83	124	395	1	0	0	502	523	328	250	306	483	22	3	0	0	0	0	0	0	0	0	0	0	0	0	0	0	0	0	0	0	0	0.421	0.451	0.383	0.352	2.009	0.315	0.568	0.000	0.000	0.000	0.000	0.000	0.000	0.000	0.000	0.000	0.000	0.000	0.000	0.000	0.000	80	506	358	396	-1.249	Error	Error	106	252	0	0	123	273	0	0	0	0
3	14	10	""	"iYBR014C"	13610	15710	120	2231	2199	1509	82	206	1062	70	50	0	4461	4177	2844	264	366	794	76	71	0	0	0	0	0	0	0	0	0	0	0	0	0	0	0	0	0	0	0	0.512	0.541	0.544	0.610	2.090	0.522	0.911	0.000	0.000	0.000	0.000	0.000	0.000	0.000	0.000	0.000	0.000	0.000	0.000	0.000	0.000	120	591	6346	6030	-0.966	Error	Error	2149	4197	0	0	2117	3913	0	0	0	0
3	15	10	""	"iYBR018C"	13800	15710	120	3289	3453	2322	83	90	52	100	97	0	3048	2775	1739	292	313	128	85	84	0	0	0	0	0	0	0	0	0	0	0	0	0	0	0	0	0	0	0	1.163	1.357	1.352	1.393	1.689	1.365	0.911	0.000	0.000	0.000	0.000	0.000	0.000	0.000	0.000	0.000	0.000	0.000	0.000	0.000	0.000	120	552	5962	5853	0.218	Error	Error	3206	2756	0	0	3370	2483	0	0	0	0
3	16	10	""	"iYBR035C"	13990	15710	120	3358	3479	2249	87	94	41	100	98	0	2685	2567	1525	289	309	104	90	85	0	0	0	0	0	0	0	0	0	0	0	0	0	0	0	0	0	0	0	1.365	1.489	1.523	1.664	1.817	1.510	0.885	0.000	0.000	0.000	0.000	0.000	0.000	0.000	0.000	0.000	0.000	0.000	0.000	0.000	0.000	120	528	5667	5670	0.449	Error	Error	3271	2396	0	0	3392	2278	0	0	0	0
3	17	10	""	"iYBR038W"	14180	15710	120	3908	3808	2536	90	101	99	97	94	0	4911	4338	2776	278	292	134	90	87	0	0	0	0	0	0	0	0	0	0	0	0	0	0	0	0	0	0	0	0.824	0.916	0.930	1.018	1.757	0.916	0.894	0.000	0.000	0.000	0.000	0.000	0.000	0.000	0.000	0.000	0.000	0.000	0.000	0.000	0.000	120	522	8451	7778	-0.279	Error	Error	3818	4633	0	0	3718	4060	0	0	0	0
3	18	10	""	"iYBR042C"	14360	15720	110	1056	974	698	93	115	121	76	71	0	1830	1641	1152	279	340	330	71	68	0	0	0	0	0	0	0	0	0	0	0	0	0	0	0	0	0	0	0	0.621	0.647	0.585	0.546	2.758	0.572	0.857	0.000	0.000	0.000	0.000	0.000	0.000	0.000	0.000	0.000	0.000	0.000	0.000	0.000	0.000	80	436	2514	2243	-0.688	Error	Error	963	1551	0	0	881	1362	0	0	0	0
3	19	10	""	"iYCR018C"	14540	15700	150	141	181	129	92	116	123	25	10	0	327	375	247	281	337	301	16	5	0	0	0	0	0	0	0	0	0	0	0	0	0	0	0	0	0	0	0	1.065	0.947	0.505	0.528	3.861	0.328	0.603	0.000	0.000	0.000	0.000	0.000	0.000	0.000	0.000	0.000	0.000	0.000	0.000	0.000	0.000	156	661	95	183	0.091	Error	Error	49	46	0	0	89	94	0	0	-50	0
3	20	10	""	"iYCRCtau1"	14750	15710	120	454	589	731	95	101	42	85	77	0	804	830	679	285	297	98	73	70	0	0	0	0	0	0	0	0	0	0	0	0	0	0	0	0	0	0	0	0.692	0.906	0.663	0.626	2.052	1.013	0.729	0.000	0.000	0.000	0.000	0.000	0.000	0.000	0.000	0.000	0.000	0.000	0.000	0.000	0.000	120	534	878	1039	-0.532	Error	Error	359	519	0	0	494	545	0	0	0	0
3	21	10	""	"iYCR020C"	14940	15710	120	939	901	627	102	107	42	84	80	0	2223	1858	1266	291	299	92	75	74	0	0	0	0	0	0	0	0	0	0	0	0	0	0	0	0	0	0	0	0.433	0.510	0.504	0.537	2.570	0.483	0.865	0.000	0.000	0.000	0.000	0.000	0.000	0.000	0.000	0.000	0.000	0.000	0.000	0.000	0.000	120	511	2769	2366	-1.207	Error	Error	837	1932	0	0	799	1567	0	0	0	0
3	22	10	""	"iSNR65"	15110	15720	110	1141	1038	667	104	142	215	76	70	0	1062	941	624	291	367	671	51	15	0	0	0	0	0	0	0	0	0	0	0	0	0	0	0	0	0	0	0	1.345	1.437	1.290	1.205	2.443	1.336	0.797	0.000	0.000	0.000	0.000	0.000	0.000	0.000	0.000	0.000	0.000	0.000	0.000	0.000	0.000	80	498	1808	1584	0.428	Error	Error	1037	771	0	0	934	650	0	0	0	0
3	1	11	""	"iYCR033W"	11140	15900	120	1812	1891	1381	78	82	32	95	90	0	3830	3665	2768	277	284	85	84	82	0	0	0	0	0	0	0	0	0	0	0	0	0	0	0	0	0	0	0	0.488	0.535	0.545	0.591	1.831	0.502	0.902	0.000	0.000	0.000	0.000	0.000	0.000	0.000	0.000	0.000	0.000	0.000	0.000	0.000	0.000	120	574	5287	5201	-1.035	Error	Error	1734	3553	0	0	1813	3388	0	0	0	0
3	2	11	""	"iYCR037C"	11330	15900	120	4329	4251	2773	81	91	60	100	95	0	3201	2911	1973	281	302	143	81	78	0	0	0	0	0	0	0	0	0	0	0	0	0	0	0	0	0	0	0	1.455	1.586	1.550	1.792	1.878	1.504	0.907	0.000	0.000	0.000	0.000	0.000	0.000	0.000	0.000	0.000	0.000	0.000	0.000	0.000	0.000	120	524	7168	6800	0.541	Error	Error	4248	2920	0	0	4170	2630	0	0	0	0
3	3	11	""	"iYCR060W"	11510	15900	110	2927	3398	2846	89	149	372	82	76	0	1590	1690	1250	296	346	296	73	70	0	0	0	0	0	0	0	0	0	0	0	0	0	0	0	0	0	0	0	2.193	2.374	2.294	2.188	2.017	2.328	0.857	0.000	0.000	0.000	0.000	0.000	0.000	0.000	0.000	0.000	0.000	0.000	0.000	0.000	0.000	80	490	4132	4703	1.133	Error	Error	2838	1294	0	0	3309	1394	0	0	0	0
3	4	11	""	"iYCR066W"	11700	15900	110	1234	1283	863	88	161	386	75	65	0	4703	4717	3412	297	458	821	77	72	0	0	0	0	0	0	0	0	0	0	0	0	0	0	0	0	0	0	0	0.260	0.270	0.254	0.301	2.457	0.239	0.887	0.000	0.000	0.000	0.000	0.000	0.000	0.000	0.000	0.000	0.000	0.000	0.000	0.000	0.000	80	494	5552	5615	-1.943	Error	Error	1146	4406	0	0	1195	4420	0	0	0	0
3	5	11	""	"iYCR071C"	11890	15910	110	2406	2157	1396	90	124	166	88	77	0	6021	5010	3255	295	514	1124	76	68	0	0	0	0	0	0	0	0	0	0	0	0	0	0	0	0	0	0	0	0.404	0.438	0.448	0.543	2.409	0.394	0.833	0.000	0.000	0.000	0.000	0.000	0.000	0.000	0.000	0.000	0.000	0.000	0.000	0.000	0.000	80	494	8042	6782	-1.306	Error	Error	2316	5726	0	0	2067	4715	0	0	0	0
3	6	11	""	"iYCR090C-1"	12080	15900	110	8566	6709	3688	95	319	1170	82	78	0	6062	5129	2824	286	582	1333	78	72	0	0	0	0	0	0	0	0	0	0	0	0	0	0	0	0	0	0	0	1.467	1.366	1.293	1.381	1.547	1.319	0.908	0.000	0.000	0.000	0.000	0.000	0.000	0.000	0.000	0.000	0.000	0.000	0.000	0.000	0.000	80	505	14247	11457	0.552	Error	Error	8471	5776	0	0	6614	4843	0	0	0	0
3	7	11	""	"iYCR094W"	12280	15900	110	1422	1377	943	98	325	1150	57	17	0	2516	2419	1702	281	517	1076	67	50	0	0	0	0	0	0	0	0	0	0	0	0	0	0	0	0	0	0	0	0.592	0.598	0.576	0.551	2.124	0.534	0.876	0.000	0.000	0.000	0.000	0.000	0.000	0.000	0.000	0.000	0.000	0.000	0.000	0.000	0.000	80	515	3559	3417	-0.755	Error	Error	1324	2235	0	0	1279	2138	0	0	0	0
3	8	11	""	"iYCRWomega3"	12470	15900	120	3357	3888	3093	92	107	97	97	95	0	5066	5847	4793	285	342	422	84	80	0	0	0	0	0	0	0	0	0	0	0	0	0	0	0	0	0	0	0	0.683	0.682	0.697	0.834	2.342	0.643	0.911	0.000	0.000	0.000	0.000	0.000	0.000	0.000	0.000	0.000	0.000	0.000	0.000	0.000	0.000	120	534	8046	9358	-0.550	Error	Error	3265	4781	0	0	3796	5562	0	0	0	0
3	9	11	""	"iYDR036C"	12650	15900	110	4866	4117	2431	103	216	659	83	76	0	4118	3580	2091	294	417	680	80	75	0	0	0	0	0	0	0	0	0	0	0	0	0	0	0	0	0	0	0	1.246	1.222	1.199	1.260	1.594	1.202	0.889	0.000	0.000	0.000	0.000	0.000	0.000	0.000	0.000	0.000	0.000	0.000	0.000	0.000	0.000	80	497	8587	7300	0.317	Error	Error	4763	3824	0	0	4014	3286	0	0	0	0
3	10	11	""	"iYDR040C"	12860	15900	120	1960	2087	1539	94	192	620	80	60	0	2402	2635	1868	273	381	633	75	66	0	0	0	0	0	0	0	0	0	0	0	0	0	0	0	0	0	0	0	0.876	0.844	0.845	0.901	2.462	0.821	0.795	0.000	0.000	0.000	0.000	0.000	0.000	0.000	0.000	0.000	0.000	0.000	0.000	0.000	0.000	120	552	3995	4355	-0.190	Error	Error	1866	2129	0	0	1993	2362	0	0	0	0
3	11	11	""	"iYDR043C-0"	13030	15910	110	1433	1678	1366	93	119	165	87	85	0	1382	1380	980	272	304	206	80	68	0	0	0	0	0	0	0	0	0	0	0	0	0	0	0	0	0	0	0	1.207	1.431	1.458	1.490	2.107	1.414	0.837	0.000	0.000	0.000	0.000	0.000	0.000	0.000	0.000	0.000	0.000	0.000	0.000	0.000	0.000	80	448	2450	2693	0.272	Error	Error	1340	1110	0	0	1585	1108	0	0	0	0
3	12	11	""	"itD(GUC)D"	13220	15900	110	1153	927	534	93	127	168	78	72	0	1290	1113	657	274	319	225	73	72	0	0	0	0	0	0	0	0	0	0	0	0	0	0	0	0	0	0	0	1.043	0.994	0.934	0.801	1.981	0.879	0.813	0.000	0.000	0.000	0.000	0.000	0.000	0.000	0.000	0.000	0.000	0.000	0.000	0.000	0.000	80	473	2076	1673	0.061	Error	Error	1060	1016	0	0	834	839	0	0	0	0
3	13	11	""	"iYDR062W"	13420	15900	110	2117	2076	1409	87	106	102	83	81	0	1820	1684	1140	262	291	188	75	73	0	0	0	0	0	0	0	0	0	0	0	0	0	0	0	0	0	0	0	1.303	1.399	1.349	1.230	1.909	1.327	0.880	0.000	0.000	0.000	0.000	0.000	0.000	0.000	0.000	0.000	0.000	0.000	0.000	0.000	0.000	80	522	3588	3411	0.382	Error	Error	2030	1558	0	0	1989	1422	0	0	0	0
3	14	11	""	"iYDR066C"	13610	15900	110	817	1150	1099	82	100	106	78	77	0	2074	2739	2709	261	307	274	75	72	0	0	0	0	0	0	0	0	0	0	0	0	0	0	0	0	0	0	0	0.405	0.431	0.373	0.382	2.032	0.389	0.874	0.000	0.000	0.000	0.000	0.000	0.000	0.000	0.000	0.000	0.000	0.000	0.000	0.000	0.000	80	482	2548	3546	-1.303	Error	Error	735	1813	0	0	1068	2478	0	0	0	0
3	15	11	""	"iYDR082W"	13790	15910	110	571	521	331	84	96	71	75	72	0	856	810	552	275	319	257	67	53	0	0	0	0	0	0	0	0	0	0	0	0	0	0	0	0	0	0	0	0.838	0.817	0.724	0.632	2.432	0.627	0.734	0.000	0.000	0.000	0.000	0.000	0.000	0.000	0.000	0.000	0.000	0.000	0.000	0.000	0.000	80	512	1068	972	-0.255	Error	Error	487	581	0	0	437	535	0	0	0	0
3	16	11	""	"iYDR086C"	13990	15900	110	1877	1609	998	88	112	128	82	81	0	1256	1046	644	273	309	184	72	70	0	0	0	0	0	0	0	0	0	0	0	0	0	0	0	0	0	0	0	1.820	1.968	1.777	1.584	2.108	1.800	0.857	0.000	0.000	0.000	0.000	0.000	0.000	0.000	0.000	0.000	0.000	0.000	0.000	0.000	0.000	80	500	2772	2294	0.864	Error	Error	1789	983	0	0	1521	773	0	0	0	0
3	17	11	""	"itR(ACG)D-1"	14170	15900	110	4016	3555	1804	94	188	469	92	81	0	2587	2459	1228	286	366	376	88	81	0	0	0	0	0	0	0	0	0	0	0	0	0	0	0	0	0	0	0	1.704	1.593	1.561	1.648	1.456	1.551	0.910	0.000	0.000	0.000	0.000	0.000	0.000	0.000	0.000	0.000	0.000	0.000	0.000	0.000	0.000	80	491	6223	5634	0.769	Error	Error	3922	2301	0	0	3461	2173	0	0	0	0
3	18	11	""	"iYDR102C"	14360	15900	110	1948	1754	997	97	217	534	81	72	0	1562	1364	788	293	409	473	72	61	0	0	0	0	0	0	0	0	0	0	0	0	0	0	0	0	0	0	0	1.459	1.547	1.456	1.347	2.204	1.373	0.835	0.000	0.000	0.000	0.000	0.000	0.000	0.000	0.000	0.000	0.000	0.000	0.000	0.000	0.000	80	506	3120	2728	0.545	Error	Error	1851	1269	0	0	1657	1071	0	0	0	0
3	19	11	""	"iYDRCsigma2"	14550	15900	110	658	591	341	99	160	320	68	45	0	1086	938	597	288	372	376	67	53	0	0	0	0	0	0	0	0	0	0	0	0	0	0	0	0	0	0	0	0.701	0.757	0.616	0.539	2.376	0.590	0.723	0.000	0.000	0.000	0.000	0.000	0.000	0.000	0.000	0.000	0.000	0.000	0.000	0.000	0.000	80	513	1357	1142	-0.514	Error	Error	559	798	0	0	492	650	0	0	0	0
3	20	11	""	"iYDR109C"	14740	15900	110	4231	4024	2698	110	161	379	81	80	0	3595	3227	2115	302	402	636	75	72	0	0	0	0	0	0	0	0	0	0	0	0	0	0	0	0	0	0	0	1.251	1.338	1.292	1.395	2.434	1.337	0.881	0.000	0.000	0.000	0.000	0.000	0.000	0.000	0.000	0.000	0.000	0.000	0.000	0.000	0.000	80	499	7414	6839	0.324	Error	Error	4121	3293	0	0	3914	2925	0	0	0	0
3	21	11	""	"iYDR418W"	14950	15900	100	490	897	939	120	142	124	73	61	0	534	753	706	319	348	232	45	31	0	0	0	0	0	0	0	0	0	0	0	0	0	0	0	0	0	0	0	1.721	1.790	1.575	1.167	3.317	1.465	0.801	0.000	0.000	0.000	0.000	0.000	0.000	0.000	0.000	0.000	0.000	0.000	0.000	0.000	0.000	80	435	585	1211	0.783	Error	Error	370	215	0	0	777	434	0	0	0	0
3	22	11	""	"iYDR421W"	15110	15900	110	1905	1864	1385	114	182	374	75	68	0	9226	8238	6539	308	607	1605	71	67	0	0	0	0	0	0	0	0	0	0	0	0	0	0	0	0	0	0	0	0.201	0.221	0.213	0.250	1.919	0.204	0.901	0.000	0.000	0.000	0.000	0.000	0.000	0.000	0.000	0.000	0.000	0.000	0.000	0.000	0.000	80	510	10709	9680	-2.316	Error	Error	1791	8918	0	0	1750	7930	0	0	0	0
3	1	12	""	"iYDR426C"	11130	16090	120	860	831	521	80	85	33	92	87	0	1128	995	628	270	278	84	75	71	0	0	0	0	0	0	0	0	0	0	0	0	0	0	0	0	0	0	0	0.909	1.036	0.957	0.974	1.721	0.910	0.811	0.000	0.000	0.000	0.000	0.000	0.000	0.000	0.000	0.000	0.000	0.000	0.000	0.000	0.000	120	553	1638	1476	-0.138	Error	Error	780	858	0	0	751	725	0	0	0	0
3	2	12	""	"itK(CUU)D2"	11300	16090	110	771	646	359	83	102	113	80	75	0	1426	1296	806	270	321	238	73	66	0	0	0	0	0	0	0	0	0	0	0	0	0	0	0	0	0	0	0	0.595	0.549	0.515	0.522	2.007	0.484	0.821	0.000	0.000	0.000	0.000	0.000	0.000	0.000	0.000	0.000	0.000	0.000	0.000	0.000	0.000	80	446	1844	1589	-0.749	Error	Error	688	1156	0	0	563	1026	0	0	0	0
3	3	12	""	"iYDR448W"	11500	16100	110	1269	1103	645	90	133	213	78	75	0	1484	1269	734	294	370	319	73	70	0	0	0	0	0	0	0	0	0	0	0	0	0	0	0	0	0	0	0	0.991	1.039	0.993	0.956	2.384	0.932	0.826	0.000	0.000	0.000	0.000	0.000	0.000	0.000	0.000	0.000	0.000	0.000	0.000	0.000	0.000	80	498	2369	1988	-0.013	Error	Error	1179	1190	0	0	1013	975	0	0	0	0
3	4	12	""	"iYDR452W"	11700	16090	120	1226	1052	629	85	117	168	84	73	0	1371	1193	704	269	349	458	68	55	0	0	0	0	0	0	0	0	0	0	0	0	0	0	0	0	0	0	0	1.035	1.047	0.984	0.999	2.415	0.957	0.838	0.000	0.000	0.000	0.000	0.000	0.000	0.000	0.000	0.000	0.000	0.000	0.000	0.000	0.000	120	545	2243	1891	0.050	Error	Error	1141	1102	0	0	967	924	0	0	0	0
3	5	12	""	"iYDR470C"	11880	16090	120	3496	3041	1804	84	102	128	95	91	0	2193	1994	1171	261	339	721	74	65	0	0	0	0	0	0	0	0	0	0	0	0	0	0	0	0	0	0	0	1.766	1.706	1.628	1.947	1.991	1.649	0.825	0.000	0.000	0.000	0.000	0.000	0.000	0.000	0.000	0.000	0.000	0.000	0.000	0.000	0.000	120	498	5344	4690	0.821	Error	Error	3412	1932	0	0	2957	1733	0	0	0	0
3	6	12	""	"iYDR473C-0"	12070	16090	120	5444	5350	3307	91	178	631	89	80	0	5713	5181	3115	271	367	636	87	80	0	0	0	0	0	0	0	0	0	0	0	0	0	0	0	0	0	0	0	0.984	1.071	1.087	1.126	1.751	1.043	0.919	0.000	0.000	0.000	0.000	0.000	0.000	0.000	0.000	0.000	0.000	0.000	0.000	0.000	0.000	120	542	10795	10169	-0.024	Error	Error	5353	5442	0	0	5259	4910	0	0	0	0
3	7	12	""	"iYDR476C"	12260	16090	120	5538	4740	2461	93	115	170	99	99	0	3089	2883	1327	271	303	247	96	95	0	0	0	0	0	0	0	0	0	0	0	0	0	0	0	0	0	0	0	1.932	1.779	1.795	1.741	1.653	1.854	0.888	0.000	0.000	0.000	0.000	0.000	0.000	0.000	0.000	0.000	0.000	0.000	0.000	0.000	0.000	120	536	8263	7259	0.950	Error	Error	5445	2818	0	0	4647	2612	0	0	0	0
3	8	12	""	"iYDR494W"	12440	16080	110	2313	1871	1028	92	114	168	82	81	0	8776	7270	4180	280	414	916	81	77	0	0	0	0	0	0	0	0	0	0	0	0	0	0	0	0	0	0	0	0.261	0.255	0.247	0.266	1.914	0.234	0.897	0.000	0.000	0.000	0.000	0.000	0.000	0.000	0.000	0.000	0.000	0.000	0.000	0.000	0.000	80	465	10717	8769	-1.936	Error	Error	2221	8496	0	0	1779	6990	0	0	0	0
3	9	12	""	"iYDR498C"	12640	16090	120	6172	5131	2957	93	145	375	92	87	0	4478	3934	2138	293	430	893	84	75	0	0	0	0	0	0	0	0	0	0	0	0	0	0	0	0	0	0	0	1.453	1.384	1.364	1.407	1.615	1.412	0.911	0.000	0.000	0.000	0.000	0.000	0.000	0.000	0.000	0.000	0.000	0.000	0.000	0.000	0.000	120	559	10264	8679	0.539	Error	Error	6079	4185	0	0	5038	3641	0	0	0	0
3	10	12	""	"iYDR502C"	12820	16090	110	243	271	146	93	100	44	77	66	0	467	480	265	272	288	103	61	48	0	0	0	0	0	0	0	0	0	0	0	0	0	0	0	0	0	0	0	0.769	0.856	0.774	0.680	2.551	0.450	0.434	0.000	0.000	0.000	0.000	0.000	0.000	0.000	0.000	0.000	0.000	0.000	0.000	0.000	0.000	80	451	345	386	-0.379	Error	Error	150	195	0	0	178	208	0	0	0	0
3	11	12	""	"itV(AAC)E1"	13010	16090	120	4441	3819	1927	91	99	55	100	100	0	2969	2632	1349	269	286	115	94	91	0	0	0	0	0	0	0	0	0	0	0	0	0	0	0	0	0	0	0	1.611	1.578	1.551	1.667	1.845	1.532	0.893	0.000	0.000	0.000	0.000	0.000	0.000	0.000	0.000	0.000	0.000	0.000	0.000	0.000	0.000	120	514	7050	6091	0.688	Error	Error	4350	2700	0	0	3728	2363	0	0	0	0
3	12	12	""	"itI(AAU)E1"	13210	16080	150	347	343	178	94	116	124	69	50	0	745	750	414	278	312	199	71	55	0	0	0	0	0	0	0	0	0	0	0	0	0	0	0	0	0	0	0	0.542	0.528	0.541	0.476	2.442	0.406	0.636	0.000	0.000	0.000	0.000	0.000	0.000	0.000	0.000	0.000	0.000	0.000	0.000	0.000	0.000	156	668	720	721	-0.884	Error	Error	253	467	0	0	249	472	0	0	0	0
3	13	12	""	"iYERCdelta20"	13400	16090	120	4040	3569	2362	89	101	84	100	93	0	6431	5802	3697	269	283	122	93	92	0	0	0	0	0	0	0	0	0	0	0	0	0	0	0	0	0	0	0	0.641	0.629	0.645	0.674	1.974	0.615	0.900	0.000	0.000	0.000	0.000	0.000	0.000	0.000	0.000	0.000	0.000	0.000	0.000	0.000	0.000	120	504	10113	9013	-0.641	Error	Error	3951	6162	0	0	3480	5533	0	0	0	0
3	14	12	""	"iYER153C"	13590	16090	120	1213	1004	562	86	91	47	90	90	0	1518	1310	711	262	281	202	78	73	0	0	0	0	0	0	0	0	0	0	0	0	0	0	0	0	0	0	0	0.897	0.876	0.866	0.815	1.849	0.840	0.857	0.000	0.000	0.000	0.000	0.000	0.000	0.000	0.000	0.000	0.000	0.000	0.000	0.000	0.000	120	515	2383	1966	-0.156	Error	Error	1127	1256	0	0	918	1048	0	0	0	0
3	15	12	""	"iYER157W"	13760	16090	110	706	583	319	86	93	53	81	78	0	1669	1415	769	273	301	182	78	73	0	0	0	0	0	0	0	0	0	0	0	0	0	0	0	0	0	0	0	0.444	0.435	0.426	0.391	2.179	0.397	0.834	0.000	0.000	0.000	0.000	0.000	0.000	0.000	0.000	0.000	0.000	0.000	0.000	0.000	0.000	80	461	2016	1639	-1.171	Error	Error	620	1396	0	0	497	1142	0	0	0	0
3	16	12	""	"iYER159C"	13950	16080	110	1308	1364	1061	89	120	174	78	76	0	1631	1679	1154	282	341	333	78	71	0	0	0	0	0	0	0	0	0	0	0	0	0	0	0	0	0	0	0	0.904	0.913	0.855	0.683	2.311	0.859	0.871	0.000	0.000	0.000	0.000	0.000	0.000	0.000	0.000	0.000	0.000	0.000	0.000	0.000	0.000	80	511	2568	2672	-0.146	Error	Error	1219	1349	0	0	1275	1397	0	0	0	0
3	17	12	""	"iYER174C"	14130	16080	110	1281	1221	730	90	184	386	77	71	0	1229	1128	693	288	384	403	71	55	0	0	0	0	0	0	0	0	0	0	0	0	0	0	0	0	0	0	0	1.266	1.346	1.334	1.044	2.824	1.113	0.780	0.000	0.000	0.000	0.000	0.000	0.000	0.000	0.000	0.000	0.000	0.000	0.000	0.000	0.000	80	521	2132	1971	0.340	Error	Error	1191	941	0	0	1131	840	0	0	0	0
3	18	12	""	"iYER178W"	14330	16080	110	2143	1846	1145	95	182	342	78	77	0	6238	5400	3178	295	457	834	80	77	0	0	0	0	0	0	0	0	0	0	0	0	0	0	0	0	0	0	0	0.345	0.343	0.326	0.311	1.710	0.319	0.878	0.000	0.000	0.000	0.000	0.000	0.000	0.000	0.000	0.000	0.000	0.000	0.000	0.000	0.000	80	526	7991	6856	-1.537	Error	Error	2048	5943	0	0	1751	5105	0	0	0	0
3	19	12	""	"iYER181C"	14520	16090	110	1745	1632	1090	110	155	245	80	77	0	1870	1689	1014	309	453	822	73	41	0	0	0	0	0	0	0	0	0	0	0	0	0	0	0	0	0	0	0	1.047	1.103	0.990	0.798	2.473	1.100	0.838	0.000	0.000	0.000	0.000	0.000	0.000	0.000	0.000	0.000	0.000	0.000	0.000	0.000	0.000	80	511	3196	2902	0.067	Error	Error	1635	1561	0	0	1522	1380	0	0	0	0
3	20	12	""	"iYFL064C"	14720	16080	120	53526	43315	23215	125	295	1077	96	93	20	53967	42216	23699	324	627	2029	97	89	13	0	0	0	0	0	0	0	0	0	0	0	0	0	0	0	0	0	0	0.995	1.031	1.003	1.054	1.654	1.000	0.902	0.000	0.000	0.000	0.000	0.000	0.000	0.000	0.000	0.000	0.000	0.000	0.000	0.000	0.000	120	566	107044	85082	-0.007	Error	Error	53401	53643	0	0	43190	41892	0	0	0	0
3	21	12	""	"iYFL061W"	14900	16080	110	1790	1456	892	135	311	1147	66	8	0	1858	1617	1042	336	672	2188	12	1	0	0	0	0	0	0	0	0	0	0	0	0	0	0	0	0	0	0	0	1.087	1.031	0.908	0.752	2.284	0.536	0.801	0.000	0.000	0.000	0.000	0.000	0.000	0.000	0.000	0.000	0.000	0.000	0.000	0.000	0.000	80	479	3177	2602	0.121	Error	Error	1655	1522	0	0	1321	1281	0	0	0	0
3	22	12	""	"iYFL056C-0"	15080	16090	110	4119	3555	2049	112	168	317	83	82	0	3006	2691	1518	309	395	423	81	76	0	0	0	0	0	0	0	0	0	0	0	0	0	0	0	0	0	0	0	1.486	1.445	1.424	1.377	2.280	1.401	0.905	0.000	0.000	0.000	0.000	0.000	0.000	0.000	0.000	0.000	0.000	0.000	0.000	0.000	0.000	80	539	6704	5825	0.571	Error	Error	4007	2697	0	0	3443	2382	0	0	0	0
3	1	13	""	"iYGL100W"	11120	16270	120	2152	1783	1050	79	81	31	95	91	0	1682	1574	956	252	260	78	80	76	0	0	0	0	0	0	0	0	0	0	0	0	0	0	0	0	0	0	0	1.450	1.289	1.256	1.293	2.102	1.211	0.895	0.000	0.000	0.000	0.000	0.000	0.000	0.000	0.000	0.000	0.000	0.000	0.000	0.000	0.000	120	570	3503	3026	0.536	Error	Error	2073	1430	0	0	1704	1322	0	0	0	0
3	2	13	""	"itH(GUG)G2"	11310	16270	120	2924	2556	1412	82	94	80	96	92	0	4496	3948	2224	270	298	163	92	87	0	0	0	0	0	0	0	0	0	0	0	0	0	0	0	0	0	0	0	0.673	0.673	0.700	0.736	1.668	0.631	0.904	0.000	0.000	0.000	0.000	0.000	0.000	0.000	0.000	0.000	0.000	0.000	0.000	0.000	0.000	120	539	7068	6152	-0.572	Error	Error	2842	4226	0	0	2474	3678	0	0	0	0
3	3	13	""	"iYGL096W-0"	11510	16270	120	3063	2666	1478	86	93	58	97	94	0	3613	3205	1936	271	291	132	85	83	0	0	0	0	0	0	0	0	0	0	0	0	0	0	0	0	0	0	0	0.891	0.879	0.882	0.989	1.802	0.825	0.907	0.000	0.000	0.000	0.000	0.000	0.000	0.000	0.000	0.000	0.000	0.000	0.000	0.000	0.000	120	528	6319	5514	-0.167	Error	Error	2977	3342	0	0	2580	2934	0	0	0	0
3	4	13	""	"iYGL083W"	11690	16270	110	5014	4049	2575	84	116	249	85	81	0	3656	3011	1871	266	301	270	76	75	0	0	0	0	0	0	0	0	0	0	0	0	0	0	0	0	0	0	0	1.454	1.444	1.441	1.505	1.937	1.462	0.898	0.000	0.000	0.000	0.000	0.000	0.000	0.000	0.000	0.000	0.000	0.000	0.000	0.000	0.000	80	453	8320	6710	0.540	Error	Error	4930	3390	0	0	3965	2745	0	0	0	0
3	5	13	""	"iYGL079W"	11870	16270	110	1515	1279	704	87	136	269	80	75	0	3973	3244	1796	268	379	518	78	76	0	0	0	0	0	0	0	0	0	0	0	0	0	0	0	0	0	0	0	0.385	0.401	0.385	0.388	1.850	0.370	0.879	0.000	0.000	0.000	0.000	0.000	0.000	0.000	0.000	0.000	0.000	0.000	0.000	0.000	0.000	80	485	5133	4168	-1.375	Error	Error	1428	3705	0	0	1192	2976	0	0	0	0
3	6	13	""	"iYGL075C"	12060	16280	110	3303	2821	1691	90	133	220	83	80	0	1991	1809	1077	272	369	476	77	71	0	0	0	0	0	0	0	0	0	0	0	0	0	0	0	0	0	0	0	1.869	1.777	1.690	1.537	2.949	1.748	0.864	0.000	0.000	0.000	0.000	0.000	0.000	0.000	0.000	0.000	0.000	0.000	0.000	0.000	0.000	80	511	4932	4268	0.902	Error	Error	3213	1719	0	0	2731	1537	0	0	0	0
3	7	13	""	"iYGL056C"	12250	16270	110	4265	3670	2150	94	193	558	80	77	0	3522	2845	1901	275	365	510	75	68	0	0	0	0	0	0	0	0	0	0	0	0	0	0	0	0	0	0	0	1.285	1.391	1.324	1.348	2.599	1.294	0.850	0.000	0.000	0.000	0.000	0.000	0.000	0.000	0.000	0.000	0.000	0.000	0.000	0.000	0.000	80	505	7418	6146	0.361	Error	Error	4171	3247	0	0	3576	2570	0	0	0	0
3	8	13	""	"iYGL053W"	12450	16270	110	1874	1501	883	93	195	477	75	67	0	1763	1554	923	285	435	748	72	48	0	0	0	0	0	0	0	0	0	0	0	0	0	0	0	0	0	0	0	1.205	1.110	1.101	0.968	2.368	1.029	0.836	0.000	0.000	0.000	0.000	0.000	0.000	0.000	0.000	0.000	0.000	0.000	0.000	0.000	0.000	80	542	3259	2677	0.269	Error	Error	1781	1478	0	0	1408	1269	0	0	0	0
3	9	13	""	"iYGL049C"	12660	16280	120	2433	2214	1319	92	125	193	88	82	0	1948	1838	1136	276	324	273	80	75	0	0	0	0	0	0	0	0	0	0	0	0	0	0	0	0	0	0	0	1.400	1.359	1.360	1.453	1.819	1.300	0.867	0.000	0.000	0.000	0.000	0.000	0.000	0.000	0.000	0.000	0.000	0.000	0.000	0.000	0.000	120	547	4013	3684	0.486	Error	Error	2341	1672	0	0	2122	1562	0	0	0	0
3	10	13	""	"iYGL036W"	12850	16280	120	591	547	310	91	93	39	85	82	0	2202	1851	1129	271	275	88	84	78	0	0	0	0	0	0	0	0	0	0	0	0	0	0	0	0	0	0	0	0.259	0.289	0.279	0.297	1.927	0.257	0.817	0.000	0.000	0.000	0.000	0.000	0.000	0.000	0.000	0.000	0.000	0.000	0.000	0.000	0.000	120	510	2431	2036	-1.949	Error	Error	500	1931	0	0	456	1580	0	0	0	0
3	11	13	""	"iYGL033W"	13020	16270	110	2285	1788	1082	90	122	199	81	76	0	2385	2038	1228	268	321	296	78	75	0	0	0	0	0	0	0	0	0	0	0	0	0	0	0	0	0	0	0	1.037	0.959	0.920	0.776	2.322	0.919	0.871	0.000	0.000	0.000	0.000	0.000	0.000	0.000	0.000	0.000	0.000	0.000	0.000	0.000	0.000	80	444	4312	3468	0.052	Error	Error	2195	2117	0	0	1698	1770	0	0	0	0
3	12	13	""	"iYGL029W"	13220	16280	120	749	669	383	89	122	200	77	64	0	2378	2035	1297	263	312	278	80	70	0	0	0	0	0	0	0	0	0	0	0	0	0	0	0	0	0	0	0	0.312	0.327	0.310	0.352	1.985	0.294	0.872	0.000	0.000	0.000	0.000	0.000	0.000	0.000	0.000	0.000	0.000	0.000	0.000	0.000	0.000	120	532	2775	2352	-1.680	Error	Error	660	2115	0	0	580	1772	0	0	0	0
3	13	13	""	"itT(UGU)G2"	13410	16280	120	761	688	412	84	97	106	80	75	0	1238	1161	751	257	274	126	73	72	0	0	0	0	0	0	0	0	0	0	0	0	0	0	0	0	0	0	0	0.690	0.668	0.625	0.596	2.157	0.569	0.823	0.000	0.000	0.000	0.000	0.000	0.000	0.000	0.000	0.000	0.000	0.000	0.000	0.000	0.000	120	534	1658	1508	-0.535	Error	Error	677	981	0	0	604	904	0	0	0	0
3	14	13	""	"iYGR258C-1"	13610	16280	120	1079	1342	1140	84	94	62	90	86	0	1183	1439	1209	269	286	107	75	74	0	0	0	0	0	0	0	0	0	0	0	0	0	0	0	0	0	0	0	1.089	1.075	1.055	1.045	2.381	0.959	0.841	0.000	0.000	0.000	0.000	0.000	0.000	0.000	0.000	0.000	0.000	0.000	0.000	0.000	0.000	120	527	1909	2428	0.123	Error	Error	995	914	0	0	1258	1170	0	0	0	0
3	15	13	""	"iYGR263C"	13780	16270	110	1783	1521	930	87	154	340	77	72	0	1753	1476	966	281	363	384	68	66	0	0	0	0	0	0	0	0	0	0	0	0	0	0	0	0	0	0	0	1.152	1.200	1.109	1.130	2.431	1.057	0.860	0.000	0.000	0.000	0.000	0.000	0.000	0.000	0.000	0.000	0.000	0.000	0.000	0.000	0.000	80	486	3168	2629	0.204	Error	Error	1696	1472	0	0	1434	1195	0	0	0	0
3	16	13	""	"iYGR281W"	14000	16280	120	1254	1200	799	87	152	325	74	68	0	5498	5048	3709	288	366	369	76	73	0	0	0	0	0	0	0	0	0	0	0	0	0	0	0	0	0	0	0	0.224	0.234	0.234	0.276	2.143	0.215	0.885	0.000	0.000	0.000	0.000	0.000	0.000	0.000	0.000	0.000	0.000	0.000	0.000	0.000	0.000	120	587	6377	5873	-2.158	Error	Error	1167	5210	0	0	1113	4760	0	0	0	0
3	17	13	""	"iYGR285C"	14170	16270	110	796	875	641	82	107	155	80	75	0	985	963	615	273	304	165	75	71	0	0	0	0	0	0	0	0	0	0	0	0	0	0	0	0	0	0	0	1.003	1.149	0.964	0.832	2.295	1.056	0.776	0.000	0.000	0.000	0.000	0.000	0.000	0.000	0.000	0.000	0.000	0.000	0.000	0.000	0.000	80	465	1426	1483	0.004	Error	Error	714	712	0	0	793	690	0	0	0	0
3	18	13	""	"iYGR288W-0"	14360	16280	120	2892	2962	2194	95	114	138	89	85	0	3632	3599	2806	286	347	487	72	69	0	0	0	0	0	0	0	0	0	0	0	0	0	0	0	0	0	0	0	0.836	0.865	0.793	1.017	2.426	0.796	0.853	0.000	0.000	0.000	0.000	0.000	0.000	0.000	0.000	0.000	0.000	0.000	0.000	0.000	0.000	120	559	6143	6180	-0.259	Error	Error	2797	3346	0	0	2867	3313	0	0	0	0
3	19	13	""	"iYHL046C"	14550	16280	120	2607	2348	1490	106	116	60	90	85	0	3322	2983	2084	298	319	129	80	80	0	0	0	0	0	0	0	0	0	0	0	0	0	0	0	0	0	0	0	0.827	0.835	0.812	0.932	2.100	0.764	0.892	0.000	0.000	0.000	0.000	0.000	0.000	0.000	0.000	0.000	0.000	0.000	0.000	0.000	0.000	120	536	5525	4927	-0.274	Error	Error	2501	3024	0	0	2242	2685	0	0	0	0
3	20	13	""	"iYHL042W"	14750	16280	120	2153	2293	1994	102	131	305	80	73	0	1429	1578	1284	296	355	801	60	39	0	0	0	0	0	0	0	0	0	0	0	0	0	0	0	0	0	0	0	1.810	1.709	1.545	1.513	2.525	1.642	0.866	0.000	0.000	0.000	0.000	0.000	0.000	0.000	0.000	0.000	0.000	0.000	0.000	0.000	0.000	120	532	3184	3473	0.856	Error	Error	2051	1133	0	0	2191	1282	0	0	0	0
3	21	13	""	"iYHL038C"	14940	16280	120	1968	1903	1431	104	128	121	87	78	0	1498	1572	1283	302	345	207	64	58	0	0	0	0	0	0	0	0	0	0	0	0	0	0	0	0	0	0	0	1.559	1.417	1.268	1.483	2.450	1.226	0.865	0.000	0.000	0.000	0.000	0.000	0.000	0.000	0.000	0.000	0.000	0.000	0.000	0.000	0.000	120	553	3060	3069	0.640	Error	Error	1864	1196	0	0	1799	1270	0	0	0	0
3	22	13	""	"itH(GUG)H"	15130	16280	120	472	431	262	101	125	178	65	50	0	866	819	582	293	332	269	60	50	0	0	0	0	0	0	0	0	0	0	0	0	0	0	0	0	0	0	0	0.647	0.627	0.502	0.488	2.807	0.462	0.728	0.000	0.000	0.000	0.000	0.000	0.000	0.000	0.000	0.000	0.000	0.000	0.000	0.000	0.000	120	631	944	856	-0.627	Error	Error	371	573	0	0	330	526	0	0	0	0
3	1	14	""	"iYHL019C"	11140	16470	120	985	884	614	79	85	43	83	80	0	965	855	569	250	263	98	70	67	0	0	0	0	0	0	0	0	0	0	0	0	0	0	0	0	0	0	0	1.267	1.331	1.285	1.244	1.948	1.181	0.809	0.000	0.000	0.000	0.000	0.000	0.000	0.000	0.000	0.000	0.000	0.000	0.000	0.000	0.000	120	603	1621	1410	0.342	Error	Error	906	715	0	0	805	605	0	0	0	0
3	2	14	""	"iYHL015W"	11320	16460	110	711	666	423	83	97	71	82	77	0	1597	1444	979	266	305	217	71	70	0	0	0	0	0	0	0	0	0	0	0	0	0	0	0	0	0	0	0	0.472	0.495	0.426	0.418	2.694	0.410	0.822	0.000	0.000	0.000	0.000	0.000	0.000	0.000	0.000	0.000	0.000	0.000	0.000	0.000	0.000	80	473	1959	1761	-1.084	Error	Error	628	1331	0	0	583	1178	0	0	0	0
3	3	14	""	"iYIL118W"	11520	16470	120	902	849	536	83	92	60	87	85	0	1336	1230	809	255	288	195	72	65	0	0	0	0	0	0	0	0	0	0	0	0	0	0	0	0	0	0	0	0.758	0.786	0.763	0.837	2.171	0.673	0.837	0.000	0.000	0.000	0.000	0.000	0.000	0.000	0.000	0.000	0.000	0.000	0.000	0.000	0.000	120	553	1900	1741	-0.400	Error	Error	819	1081	0	0	766	975	0	0	0	0
3	4	14	""	"iYIL114C"	11700	16460	110	1058	1195	996	80	133	309	77	70	0	976	978	661	272	318	299	71	60	0	0	0	0	0	0	0	0	0	0	0	0	0	0	0	0	0	0	0	1.389	1.579	1.509	1.467	2.979	1.517	0.813	0.000	0.000	0.000	0.000	0.000	0.000	0.000	0.000	0.000	0.000	0.000	0.000	0.000	0.000	80	501	1682	1821	0.474	Error	Error	978	704	0	0	1115	706	0	0	0	0
3	5	14	""	"iYIL110W"	11910	16470	120	827	749	475	88	132	225	75	62	0	3034	2413	1506	281	344	352	77	72	0	0	0	0	0	0	0	0	0	0	0	0	0	0	0	0	0	0	0	0.268	0.310	0.298	0.304	2.288	0.298	0.844	0.000	0.000	0.000	0.000	0.000	0.000	0.000	0.000	0.000	0.000	0.000	0.000	0.000	0.000	120	577	3492	2793	-1.897	Error	Error	739	2753	0	0	661	2132	0	0	0	0
3	6	14	""	"iYIL096C"	12070	16470	110	1418	1141	672	94	127	172	78	73	0	1535	1391	859	282	333	278	75	68	0	0	0	0	0	0	0	0	0	0	0	0	0	0	0	0	0	0	0	1.057	0.944	0.849	0.766	2.193	0.834	0.837	0.000	0.000	0.000	0.000	0.000	0.000	0.000	0.000	0.000	0.000	0.000	0.000	0.000	0.000	80	456	2577	2156	0.080	Error	Error	1324	1253	0	0	1047	1109	0	0	0	0
3	7	14	""	"iYIL093C"	12280	16470	120	1474	1433	1041	93	162	428	70	61	0	1247	1194	885	281	355	425	60	51	0	0	0	0	0	0	0	0	0	0	0	0	0	0	0	0	0	0	0	1.430	1.468	1.323	1.148	2.774	1.283	0.834	0.000	0.000	0.000	0.000	0.000	0.000	0.000	0.000	0.000	0.000	0.000	0.000	0.000	0.000	120	565	2347	2253	0.516	Error	Error	1381	966	0	0	1340	913	0	0	0	0
3	8	14	""	"iYIL089W"	12460	16470	120	2099	1953	1395	89	110	119	84	79	0	3140	3110	2574	267	291	175	72	67	0	0	0	0	0	0	0	0	0	0	0	0	0	0	0	0	0	0	0	0.700	0.656	0.604	0.840	2.843	0.565	0.869	0.000	0.000	0.000	0.000	0.000	0.000	0.000	0.000	0.000	0.000	0.000	0.000	0.000	0.000	120	532	4883	4707	-0.515	Error	Error	2010	2873	0	0	1864	2843	0	0	0	0
3	9	14	""	"iYIL072W"	12660	16470	120	1817	1622	1050	89	99	55	91	88	0	3288	2799	1950	267	310	356	74	70	0	0	0	0	0	0	0	0	0	0	0	0	0	0	0	0	0	0	0	0.572	0.605	0.592	0.743	2.293	0.540	0.882	0.000	0.000	0.000	0.000	0.000	0.000	0.000	0.000	0.000	0.000	0.000	0.000	0.000	0.000	120	516	4749	4065	-0.806	Error	Error	1728	3021	0	0	1533	2532	0	0	0	0
3	10	14	""	"iYIL068C"	12850	16470	120	1238	1075	683	91	100	58	84	80	0	1069	986	657	268	296	185	67	63	0	0	0	0	0	0	0	0	0	0	0	0	0	0	0	0	0	0	0	1.432	1.370	1.217	1.122	3.012	1.175	0.817	0.000	0.000	0.000	0.000	0.000	0.000	0.000	0.000	0.000	0.000	0.000	0.000	0.000	0.000	120	505	1948	1702	0.518	Error	Error	1147	801	0	0	984	718	0	0	0	0
3	11	14	""	"iYIL063C"	13040	16470	120	1000	909	575	91	125	187	78	70	0	963	859	494	268	349	592	56	9	0	0	0	0	0	0	0	0	0	0	0	0	0	0	0	0	0	0	0	1.308	1.384	1.271	1.176	2.553	1.303	0.753	0.000	0.000	0.000	0.000	0.000	0.000	0.000	0.000	0.000	0.000	0.000	0.000	0.000	0.000	120	535	1604	1409	0.387	Error	Error	909	695	0	0	818	591	0	0	0	0
3	12	14	""	"iYIL046W"	13230	16470	120	2331	2029	1289	89	110	129	90	84	0	2859	2429	1556	275	344	450	75	69	0	0	0	0	0	0	0	0	0	0	0	0	0	0	0	0	0	0	0	0.868	0.901	0.897	0.947	1.832	0.871	0.883	0.000	0.000	0.000	0.000	0.000	0.000	0.000	0.000	0.000	0.000	0.000	0.000	0.000	0.000	120	509	4826	4094	-0.205	Error	Error	2242	2584	0	0	1940	2154	0	0	0	0
3	13	14	""	"iYIL042C"	13410	16470	110	1604	1312	781	90	145	258	78	75	0	1114	1013	636	277	321	236	68	66	0	0	0	0	0	0	0	0	0	0	0	0	0	0	0	0	0	0	0	1.809	1.660	1.438	1.741	2.095	1.391	0.829	0.000	0.000	0.000	0.000	0.000	0.000	0.000	0.000	0.000	0.000	0.000	0.000	0.000	0.000	80	436	2351	1958	0.855	Error	Error	1514	837	0	0	1222	736	0	0	0	0
3	14	14	""	"iYIL038C"	13590	16470	110	1445	1458	1079	93	175	340	73	67	0	1345	1181	872	285	356	304	67	61	0	0	0	0	0	0	0	0	0	0	0	0	0	0	0	0	0	0	0	1.275	1.523	1.350	1.216	2.407	1.366	0.846	0.000	0.000	0.000	0.000	0.000	0.000	0.000	0.000	0.000	0.000	0.000	0.000	0.000	0.000	80	497	2412	2261	0.351	Error	Error	1352	1060	0	0	1365	896	0	0	0	0
3	15	14	""	"iYJL014W"	13800	16470	120	1556	1227	820	92	150	273	73	64	0	8317	6629	5078	295	413	519	74	70	0	0	0	0	0	0	0	0	0	0	0	0	0	0	0	0	0	0	0	0.182	0.179	0.185	0.248	2.751	0.161	0.905	0.000	0.000	0.000	0.000	0.000	0.000	0.000	0.000	0.000	0.000	0.000	0.000	0.000	0.000	120	595	9486	7469	-2.454	Error	Error	1464	8022	0	0	1135	6334	0	0	0	0
3	16	14	""	"itK(CUU)J"	14000	16470	120	1923	1704	1027	84	102	89	93	84	0	5586	5014	3183	281	373	488	83	76	0	0	0	0	0	0	0	0	0	0	0	0	0	0	0	0	0	0	0	0.347	0.342	0.344	0.374	1.704	0.319	0.897	0.000	0.000	0.000	0.000	0.000	0.000	0.000	0.000	0.000	0.000	0.000	0.000	0.000	0.000	120	469	7144	6353	-1.528	Error	Error	1839	5305	0	0	1620	4733	0	0	0	0
3	17	14	""	"iYJL010C"	14180	16470	120	1118	963	540	86	105	90	88	80	0	1751	1459	842	286	321	190	76	74	0	0	0	0	0	0	0	0	0	0	0	0	0	0	0	0	0	0	0	0.704	0.748	0.710	0.723	1.801	0.661	0.842	0.000	0.000	0.000	0.000	0.000	0.000	0.000	0.000	0.000	0.000	0.000	0.000	0.000	0.000	120	506	2497	2050	-0.505	Error	Error	1032	1465	0	0	877	1173	0	0	0	0
3	18	14	""	"iYJR005W"	14380	16470	120	3719	3283	1995	104	116	62	98	96	0	5862	5041	2921	301	329	128	96	95	0	0	0	0	0	0	0	0	0	0	0	0	0	0	0	0	0	0	0	0.650	0.671	0.690	0.668	1.638	0.652	0.894	0.000	0.000	0.000	0.000	0.000	0.000	0.000	0.000	0.000	0.000	0.000	0.000	0.000	0.000	120	483	9176	7919	-0.621	Error	Error	3615	5561	0	0	3179	4740	0	0	0	0
3	19	14	""	"iYJR009C-0"	14570	16470	120	2430	2133	1383	102	116	70	91	85	0	2948	2628	1902	290	324	142	80	75	0	0	0	0	0	0	0	0	0	0	0	0	0	0	0	0	0	0	0	0.876	0.869	0.902	1.025	2.270	0.772	0.899	0.000	0.000	0.000	0.000	0.000	0.000	0.000	0.000	0.000	0.000	0.000	0.000	0.000	0.000	120	472	4986	4369	-0.191	Error	Error	2328	2658	0	0	2031	2338	0	0	0	0
[truncated: 4,319,780 more chars]
