# Supplementary material for: Genome-Wide Mapping of the Cohesin Complex in the Yeast Saccharomyces cerevisiae
Source: PLoS Biol. 2004 Jul 27;2(9):e259. doi: 10.1371/journal.pbio.0020259 (PMC490026; doi:10.1371/journal.pbio.0020259)
Supplement: Dataset S27 — Cy3 = ChIP 8h Rec8-3HA in SK1; Cy5 = genomic DNA. (2.6 MB XLS). [file pbio.0020259.sd027.xls]

ATF	1.0
27	43    
"Type=GenePix Results 1.4"
"DateTime=2001/03/03 11:36:04"
"Settings=C:\Documents and Settings\jen\My Documents\cohesins, meiosis\UP3_191.gps"
"GalFile=C:\Documents and Settings\jen\My Documents\cohesinArrayData2\UberPrint3_v2.gal"
"Scanner=GenePix 4000A [54795]"
"Comment=Cy5=total genomic t8 meiosis Cy3=Rec8 IP t8 meiosis HongGuo"
"PixelSize=10"
"ImageName=635 nm	532 nm"
"FileName=C:\Documents and Settings\jen\My Documents\cohesins, meiosis\UP3_191_635_nm.tif	C:\Documents and Settings\jen\My Documents\cohesins, meiosis\UP3_191_532_nm.tif"
"PMTVolts=620	660"
"ScanPower=100	100"
"FocusPosition=0"
"NormalizationFactor:RatioOfMedians=1.02078"
"NormalizationFactor:RatioOfMeans=0.994813"
"NormalizationFactor:MedianOfRatios=1.00597"
"NormalizationFactor:MeanOfRatios=0.929181"
"NormalizationFactor:RegressionRatio=1.03986"
"JpegImage=C:\Documents and Settings\jen\My Documents\cohesins, meiosis\UP3_191.jpg"
"RatioFormulation=W1/W2 (635 nm/532 nm)"
"Barcode="
"ImageOrigin=1960, 14240"
"JpegOrigin=2400, 14590"
"Creator=GenePix Pro 3.0.6.55"
"Temperature=1.46"
"LaserPower=3.28	4.6"
"LaserOnTime=21785	21926"
"Supplier="
"Block"	"Column"	"Row"	"Name"	"ID"	"X"	"Y"	"Dia."	"F635 Median"	"F635 Mean"	"F635 SD"	"B635 Median"	"B635 Mean"	"B635 SD"	"% > B635+1SD"	"% > B635+2SD"	"F635 % Sat."	"F532 Median"	"F532 Mean"	"F532 SD"	"B532 Median"	"B532 Mean"	"B532 SD"	"% > B532+1SD"	"% > B532+2SD"	"F532 % Sat."	"Ratio of Medians"	"Ratio of Means"	"Median of Ratios"	"Mean of Ratios"	"Ratios SD"	"Rgn Ratio"	"Rgn R�"	"F Pixels"	"B Pixels"	"Sum of Medians"	"Sum of Means"	"Log Ratio"	"F635 Median - B635"	"F532 Median - B532"	"F635 Mean - B635"	"F532 Mean - B532"	"Flags"
1	1	1	"YBL081W"	"YBL081W"	2670	14880	140	2786	2503	1742	56	74	55	91	88	0	1966	1986	1431	99	110	47	87	84	0	1.462	1.297	1.290	1.420	1.841	1.271	0.932	156	754	4597	4334	0.548	2730	1867	2447	1887	0
1	2	1	"YBL112C"	"YBL112C"	2860	14870	150	5830	9104	9962	55	64	38	100	100	1	2800	4665	6793	94	100	31	100	100	0	2.134	1.980	1.931	1.944	1.442	1.698	0.799	156	834	8481	13620	1.094	5775	2706	9049	4571	0
1	3	1	"CDS1"	"YBR029C"	3080	14860	120	534	684	478	54	58	19	100	100	0	438	527	320	93	109	309	52	29	0	1.391	1.452	1.370	1.445	1.798	0.760	0.290	120	622	825	1064	0.476	480	345	630	434	0
1	4	1	"YBL083C"	"YBL083C"	3280	14880	110	435	512	339	53	55	14	100	100	0	385	507	376	93	96	24	88	85	0	1.308	1.109	1.204	1.481	2.215	1.001	0.866	80	546	674	873	0.388	382	292	459	414	0
1	5	1	"NTH2"	"YBR001C"	3470	14890	110	854	864	452	54	64	157	95	86	0	2403	2447	1569	97	104	93	98	93	0	0.347	0.345	0.382	0.397	1.727	0.310	0.863	80	539	3106	3160	-1.527	800	2306	810	2350	0
1	6	1	"RPL4A"	"YBR031W"	3670	14890	120	1746	1612	994	54	56	14	100	100	0	1838	1613	968	94	98	23	99	95	0	0.970	1.026	1.010	1.099	1.547	1.029	0.934	120	662	3436	3077	-0.044	1692	1744	1558	1519	0
1	7	1	"BOI1"	"YBL085W"	3880	14870	80	255	314	226	53	57	21	98	86	0	297	353	242	93	96	25	86	76	0	0.990	1.004	1.139	1.152	2.040	1.007	0.830	52	301	406	521	-0.014	202	204	261	260	0
1	8	1	"COQ1"	"YBR003W"	4070	14890	130	4980	5322	3750	54	60	26	100	100	0	6128	6641	4528	94	102	65	100	100	0	0.816	0.805	0.792	0.797	1.491	0.824	0.912	120	707	10960	11815	-0.293	4926	6034	5268	6547	0
1	9	1	"YBR033W"	"YBR033W"	4260	14890	140	3023	3367	2781	55	59	22	100	100	0	3840	4513	3835	93	99	57	99	98	0	0.792	0.749	0.750	0.799	1.634	0.730	0.933	156	753	6715	7732	-0.336	2968	3747	3312	4420	0
1	10	1	"RPL23A"	"YBL087C"	4460	14870	130	4715	4433	3149	54	63	51	100	100	0	2397	1923	1357	92	99	36	100	99	0	2.022	2.392	2.408	2.473	1.397	2.379	0.951	120	654	6966	6210	1.016	4661	2305	4379	1831	0
1	11	1	"YBR005W"	"YBR005W"	4670	14890	150	1577	1701	1144	53	61	48	100	98	0	2343	2486	1743	91	99	41	99	98	0	0.677	0.688	0.680	0.755	1.635	0.677	0.918	156	816	3776	4043	-0.563	1524	2252	1648	2395	0
1	12	1	"PDX3"	"YBR035C"	4870	14890	130	4338	3719	2068	53	58	24	100	100	0	3277	3113	1713	93	99	34	100	100	0	1.346	1.214	1.202	1.215	1.386	1.225	0.936	120	661	7469	6686	0.428	4285	3184	3666	3020	0
1	13	1	"YCL045C"	"YCL045C"	5060	14880	80	245	391	314	55	58	15	98	94	0	228	335	283	98	100	22	92	80	0	1.462	1.418	1.642	1.665	2.324	1.256	0.723	52	314	320	573	0.547	190	130	336	237	0
1	14	1	"YCLX04W"	"YCLX04W"	5280	14860	140	1476	1864	1452	52	53	13	100	100	0	1017	1356	1005	93	95	20	98	96	0	1.541	1.435	1.384	1.428	1.454	1.449	0.943	156	856	2348	3075	0.624	1424	924	1812	1263	0
1	15	1	"YCR023C"	"YCR023C"	5500	14870	120	759	871	682	53	81	123	85	76	0	842	1029	838	92	122	132	80	74	0	0.941	0.873	0.901	0.979	1.617	0.828	0.919	120	567	1456	1755	-0.087	706	750	818	937	0
1	16	1	"YCL047C"	"YCL047C"	5700	14890	150	356	486	434	55	100	154	71	48	0	509	612	512	93	143	170	71	58	0	0.724	0.830	0.755	0.801	1.908	0.863	0.876	156	695	717	950	-0.467	301	416	431	519	-50
1	17	1	"YCLX06C"	"YCLX06C"	5870	14860	170	1582	2835	2420	53	74	97	100	100	0	1706	3116	2527	91	114	127	100	99	0	0.947	0.920	0.876	0.871	1.405	0.933	0.954	208	980	3144	5807	-0.079	1529	1615	2782	3025	0
1	18	1	"PMP1"	"YCR024C-A"	6080	14880	140	2514	2337	1168	52	69	84	99	97	0	2049	1864	964	91	108	115	98	93	0	1.257	1.289	1.287	1.345	1.434	1.270	0.947	156	771	4420	4058	0.330	2462	1958	2285	1773	0
1	19	1	"YCL049C"	"YCL049C"	6270	14880	110	748	808	514	52	56	27	100	100	0	804	848	568	89	95	29	97	95	0	0.973	0.996	1.000	1.075	1.550	0.970	0.937	80	522	1411	1515	-0.039	696	715	756	759	0
1	20	1	"YCLX08C"	"YCLX08C"	6480	14900	160	1366	2140	1749	52	56	25	100	100	0	1186	1941	1526	92	97	42	100	100	0	1.201	1.129	1.059	1.102	1.532	1.143	0.944	208	1002	2408	3937	0.264	1314	1094	2088	1849	0
1	21	1	"YCR026C"	"YCR026C"	6680	14890	130	1151	1188	697	54	59	37	100	98	0	926	934	514	95	100	50	98	93	0	1.320	1.352	1.343	1.411	1.642	1.384	0.880	120	751	1928	1973	0.401	1097	831	1134	839	0
1	1	2	"LRE1"	"YCL051W"	2680	15080	140	643	700	510	57	75	51	91	89	0	549	748	665	102	115	48	89	83	0	1.311	0.995	1.150	1.195	1.731	0.848	0.873	156	700	1033	1289	0.391	586	447	643	646	0
1	2	2	"YCLX10C"	"YCLX10C"	2890	15090	150	2479	2374	1289	56	64	33	100	100	0	6219	5899	3255	97	103	41	100	100	0	0.396	0.400	0.378	0.400	1.329	0.392	0.950	156	690	8545	8120	-1.337	2423	6122	2318	5802	0
1	3	2	"FEN2"	"YCR028C"	3080	15090	140	6859	6597	3717	55	59	18	100	100	0	6845	6319	3442	95	97	21	100	100	0	1.008	1.051	1.028	1.051	1.287	1.066	0.970	156	716	13554	12766	0.011	6804	6750	6542	6224	0
1	4	2	"SHR3"	"YDL212W"	3300	15080	120	1731	2104	1429	57	69	154	99	97	0	1108	1254	832	96	108	101	96	94	0	1.654	1.768	1.834	1.858	1.485	1.786	0.921	120	571	2686	3205	0.726	1674	1012	2047	1158	0
1	5	2	"THI13"	"YDL244W"	3480	15090	150	2229	2398	1514	58	73	141	100	96	0	2783	3037	2006	96	114	106	100	99	0	0.808	0.796	0.748	0.815	1.425	0.778	0.931	156	711	4858	5281	-0.308	2171	2687	2340	2941	0
1	6	2	"REG1"	"YDR028C"	3670	15080	120	1311	1307	715	56	61	23	100	98	0	1000	1019	539	92	99	34	98	95	0	1.382	1.350	1.371	1.353	1.592	1.359	0.927	120	562	2163	2178	0.467	1255	908	1251	927	0
1	7	2	"YDL214C"	"YDL214C"	3880	15080	110	627	684	430	56	59	16	100	100	0	491	539	369	93	95	20	91	88	0	1.435	1.408	1.469	1.594	1.768	1.282	0.863	80	582	969	1074	0.521	571	398	628	446	0
1	8	2	"YDL246C"	"YDL246C"	4070	15080	90	207	238	131	57	62	26	94	84	0	231	264	141	96	105	80	69	44	0	1.111	1.077	0.940	1.067	2.407	0.930	0.661	52	400	285	349	0.152	150	135	181	168	0
1	9	2	"RAD28"	"YDR030C"	4310	15070	120	1109	1163	746	57	65	41	100	98	0	697	753	479	94	106	66	90	85	0	1.745	1.678	1.659	1.851	1.559	1.655	0.930	120	560	1655	1765	0.803	1052	603	1106	659	0
1	10	2	"YDL216C"	"YDL216C"	4480	15080	120	3308	3231	1453	55	67	57	100	100	0	3683	3600	1843	93	114	87	100	100	0	0.906	0.906	0.890	0.964	1.426	0.872	0.951	120	558	6843	6683	-0.142	3253	3590	3176	3507	0
1	11	2	"COS7"	"YDL248W"	4700	15070	140	795	919	765	53	59	28	99	98	0	862	1128	957	93	101	44	96	92	0	0.965	0.837	0.867	0.941	1.679	0.810	0.937	156	654	1511	1901	-0.052	742	769	866	1035	0
1	12	2	"YDR032C"	"YDR032C"	4900	15080	130	2142	2129	1074	56	63	31	100	100	0	1164	1087	531	93	99	36	96	93	0	1.948	2.086	2.010	2.278	1.562	2.107	0.932	120	528	3157	3067	0.962	2086	1071	2073	994	0
1	13	2	"YDL218W"	"YDL218W"	5070	15100	140	2905	3410	2485	56	60	23	99	98	0	3356	3623	2462	95	97	23	99	99	0	0.874	0.951	0.931	0.897	1.466	0.978	0.957	156	622	6110	6882	-0.195	2849	3261	3354	3528	0
1	14	2	"YRB1"	"YDR002W"	5280	15090	150	2935	2594	1486	53	55	16	100	100	0	2397	2164	1255	95	99	37	99	99	0	1.252	1.228	1.187	1.297	1.527	1.220	0.943	156	700	5184	4610	0.324	2882	2302	2541	2069	0
1	15	2	"LYS14"	"YDR034C"	5480	15070	140	2962	2886	1846	54	89	139	99	98	0	3553	3685	2359	95	134	154	100	98	0	0.841	0.789	0.765	0.776	1.374	0.782	0.949	156	673	6366	6422	-0.250	2908	3458	2832	3590	0
1	16	2	"MRP1"	"YDR347W"	5690	15080	150	4632	4114	2396	55	107	164	100	96	0	4208	3640	2097	94	152	181	98	94	0	1.113	1.145	1.154	1.156	1.269	1.150	0.974	156	605	8691	7605	0.154	4577	4114	4059	3546	0
1	17	2	"RGA2"	"YDR379W"	5880	15100	150	6055	6241	4247	54	72	102	100	100	0	2891	3176	2030	93	117	145	100	98	0	2.145	2.007	1.986	1.925	1.355	2.066	0.963	156	649	8799	9270	1.101	6001	2798	6187	3083	0
1	18	2	"YDR411C"	"YDR411C"	6100	15100	140	2684	4444	3754	53	57	19	100	100	0	1861	2812	2311	92	98	76	100	99	0	1.487	1.614	1.561	1.609	1.453	1.634	0.960	156	671	4400	7111	0.573	2631	1769	4391	2720	0
1	19	2	"YPS7"	"YDR349C"	6300	15090	110	849	766	420	53	58	24	100	98	0	691	666	389	91	96	27	95	92	0	1.327	1.240	1.330	1.477	1.890	1.173	0.924	80	484	1396	1288	0.408	796	600	713	575	0
1	20	2	"YRA1"	"YDR381W"	6490	15110	150	1407	1486	1065	53	56	18	100	99	0	1373	1564	1033	90	95	22	99	99	0	1.055	0.972	0.934	0.920	1.398	1.017	0.954	156	675	2637	2907	0.078	1354	1283	1433	1474	0
1	21	2	"YDR413C"	"YDR413C"	6710	15110	150	3260	3999	2980	53	57	27	100	100	0	1722	2249	1514	91	96	39	100	100	0	1.966	1.829	1.777	1.733	1.367	1.993	0.949	156	908	4838	6104	0.975	3207	1631	3946	2158	0
1	1	3	"SBE2"	"YDR351W"	2700	15300	160	4111	6450	5113	55	58	19	100	100	0	2157	2954	2185	97	101	33	99	99	0	1.969	2.238	2.193	2.217	1.532	2.321	0.956	208	879	6116	9252	0.977	4056	2060	6395	2857	0
1	2	3	"YDR383C"	"YDR383C"	2900	15310	150	5490	5290	2930	55	58	15	100	100	0	5633	5655	3099	95	99	35	100	100	0	0.981	0.942	0.927	0.956	1.381	0.947	0.951	156	636	10973	10795	-0.027	5435	5538	5235	5560	0
1	3	3	"YDR415C"	"YDR415C"	3110	15300	140	5454	5854	3584	55	58	16	100	100	0	2942	3097	1822	94	95	20	100	100	0	1.896	1.931	1.871	1.919	1.406	1.977	0.946	156	611	8247	8802	0.923	5399	2848	5799	3003	0
1	4	3	"TRR1"	"YDR353W"	3300	15310	150	5253	4725	2590	57	64	35	100	100	0	2558	2376	1206	94	105	68	100	100	0	2.109	2.046	2.077	2.015	1.375	2.130	0.942	156	614	7660	6950	1.076	5196	2464	4668	2282	0
1	5	3	"EFT2"	"YDR385W"	3510	15310	150	7247	7783	4956	58	67	41	100	100	0	3600	3488	2148	92	109	78	100	100	0	2.049	2.275	2.236	2.247	1.412	2.396	0.941	156	600	10697	11121	1.035	7189	3508	7725	3396	0
1	6	3	"YDR417C"	"YDR417C"	3710	15300	150	2803	2505	1584	57	60	21	100	100	0	2408	2289	1412	91	96	28	100	100	0	1.185	1.114	1.105	1.119	1.463	1.122	0.949	156	714	5063	4646	0.245	2746	2317	2448	2198	0
1	7	3	"YER097W"	"YER097W"	3910	15290	130	2427	2291	1322	56	58	15	100	100	0	1375	1253	712	91	94	21	99	98	0	1.847	1.923	1.993	2.026	1.500	1.926	0.943	120	612	3655	3397	0.885	2371	1284	2235	1162	0
1	8	3	"YER128W"	"YER128W"	4100	15300	150	3796	4013	2697	55	59	18	100	100	0	2355	2590	1717	93	96	23	99	99	0	1.654	1.585	1.578	1.634	1.703	1.597	0.948	156	781	6003	6455	0.726	3741	2262	3958	2497	0
1	9	3	"YER160C"	"YER160C"	4300	15290	130	4841	5269	3260	55	58	19	100	100	0	3078	3233	2044	93	97	33	100	100	0	1.603	1.661	1.708	1.749	1.456	1.664	0.914	120	623	7771	8354	0.681	4786	2985	5214	3140	0
1	10	3	"PRS2"	"YER099C"	4510	15300	140	3344	4045	2875	55	64	45	100	100	0	2438	3004	2174	91	107	77	100	98	0	1.401	1.370	1.341	1.391	1.565	1.364	0.936	156	671	5636	6903	0.487	3289	2347	3990	2913	0
1	11	3	"YER130C"	"YER130C"	4700	15300	140	2753	2916	1836	53	55	13	100	100	0	5416	6056	4045	91	93	24	100	100	0	0.507	0.480	0.470	0.493	1.580	0.461	0.946	156	664	8025	8828	-0.980	2700	5325	2863	5965	0
1	12	3	"RAD4"	"YER162C"	4920	15300	140	5462	6564	4346	55	242	2882	70	48	0	2730	3250	2144	91	179	1506	67	44	0	2.049	2.060	2.043	2.083	1.482	2.104	0.946	156	616	8046	9668	1.035	5407	2639	6509	3159	0
1	13	3	"AST2"	"YER101C"	5120	15290	140	4845	4373	2219	55	256	3004	65	34	0	3639	3441	1795	92	186	1569	76	54	0	1.350	1.289	1.299	1.322	1.352	1.376	0.929	156	567	8337	7667	0.433	4790	3547	4318	3349	0
1	14	3	"PMD1"	"YER132C"	5310	15290	130	4464	4571	2776	55	57	16	100	100	0	3695	3515	2153	93	98	41	100	100	0	1.224	1.320	1.354	1.367	1.401	1.329	0.935	120	539	8011	7938	0.292	4409	3602	4516	3422	0
1	15	3	"CHD1"	"YER164W"	5520	15310	160	3865	4492	3214	53	56	14	100	100	0	2117	2680	1895	91	94	36	99	98	0	1.882	1.715	1.658	1.659	1.540	1.732	0.943	208	684	5838	7028	0.912	3812	2026	4439	2589	0
1	16	3	"SSA4"	"YER103W"	5700	15300	140	5420	5631	3558	53	55	15	100	100	0	3416	3768	2397	90	93	26	100	100	0	1.614	1.517	1.483	1.526	1.409	1.517	0.947	156	618	8693	9256	0.690	5367	3326	5578	3678	0
1	17	3	"YER134C"	"YER134C"	5940	15290	140	2319	2563	1701	54	57	17	100	100	0	1524	1585	1015	91	95	27	99	98	0	1.581	1.679	1.674	1.741	1.581	1.707	0.930	156	637	3698	4003	0.660	2265	1433	2509	1494	0
1	18	3	"YER166W"	"YER166W"	6110	15290	110	699	749	496	53	56	19	97	96	0	571	685	519	89	92	21	91	88	0	1.340	1.168	1.268	1.506	1.934	1.056	0.905	80	368	1128	1292	0.423	646	482	696	596	0
1	19	3	"AMS1"	"YGL156W"	6290	15290	140	3034	3725	2723	54	58	22	100	100	0	2135	2484	1730	90	94	24	100	100	0	1.457	1.533	1.507	1.557	1.441	1.582	0.944	156	663	5025	6065	0.543	2980	2045	3671	2394	0
1	20	3	"YGL188C"	"YGL188C"	6510	15300	130	460	465	202	53	56	17	99	99	0	410	417	179	92	94	20	94	94	0	1.280	1.268	1.284	1.359	1.622	1.239	0.866	120	561	725	737	0.356	407	318	412	325	0
1	21	3	"YGL220W"	"YGL220W"	6690	15310	130	3124	2880	1804	52	55	16	100	100	0	2083	1907	1177	92	93	19	100	100	0	1.543	1.558	1.565	1.628	1.627	1.582	0.914	120	595	5063	4643	0.626	3072	1991	2828	1815	0
1	1	4	"RCK1"	"YGL158W"	2690	15500	150	4087	4119	3008	55	59	23	100	100	0	2205	2235	1523	96	102	31	100	100	0	1.912	1.900	1.890	1.824	1.355	1.787	0.676	156	812	6141	6203	0.935	4032	2109	4064	2139	0
1	2	4	"CDC55"	"YGL190C"	2910	15500	130	3571	3575	2327	55	59	22	100	100	0	3691	3655	2335	95	100	30	100	100	0	0.978	0.989	0.994	0.997	1.253	0.996	0.978	120	571	7112	7080	-0.032	3516	3596	3520	3560	0
1	3	4	"YGL222C"	"YGL222C"	3120	15500	140	3053	3291	2000	53	58	19	100	100	0	1761	1921	1146	94	96	22	100	100	0	1.800	1.772	1.760	1.810	1.277	1.773	0.976	156	590	4667	5065	0.848	3000	1667	3238	1827	0
1	4	4	"YGL160W"	"YGL160W"	3330	15490	140	4292	5207	3554	54	57	16	100	100	0	2665	3596	2488	94	97	24	100	100	0	1.648	1.471	1.485	1.501	1.269	1.459	0.980	156	523	6809	8655	0.721	4238	2571	5153	3502	0
1	5	4	"IME4"	"YGL192W"	3520	15500	140	4340	4822	3098	54	57	16	100	100	0	3616	4014	2650	93	95	25	100	100	0	1.217	1.216	1.201	1.252	1.353	1.200	0.975	156	506	7809	8689	0.283	4286	3523	4768	3921	0
1	6	4	"YGL224C"	"YGL224C"	3710	15510	140	3484	3673	2448	55	59	17	100	100	0	5555	6101	4030	92	96	39	100	100	0	0.628	0.602	0.598	0.589	1.398	0.604	0.969	156	586	8892	9627	-0.672	3429	5463	3618	6009	0
1	7	4	"SUT1"	"YGL162W"	3910	15500	130	2464	2975	1919	56	59	16	100	100	0	1660	1837	1185	91	97	38	100	98	0	1.535	1.672	1.683	1.734	1.300	1.663	0.972	120	575	3977	4665	0.618	2408	1569	2919	1746	0
1	8	4	"HOS2"	"YGL194C"	4100	15510	150	4249	4249	2590	55	59	17	100	100	0	5182	5035	2927	92	95	21	100	100	0	0.824	0.848	0.850	0.826	1.279	0.866	0.983	156	673	9284	9137	-0.279	4194	5090	4194	4943	0
1	9	4	"YGL226W"	"YGL226W"	4320	15500	140	2219	2648	1974	56	58	17	100	100	0	1586	2197	1707	91	93	21	100	100	0	1.447	1.231	1.276	1.307	1.341	1.198	0.971	156	626	3658	4698	0.533	2163	1495	2592	2106	0
1	10	4	"YGR277C"	"YGR277C"	4510	15510	150	5892	5918	4029	53	55	14	100	100	0	1819	2017	1411	88	94	58	100	100	0	3.373	3.040	3.138	3.035	1.351	3.049	0.955	156	605	7570	7794	1.754	5839	1731	5865	1929	0
1	11	4	"YHL013C"	"YHL013C"	4720	15490	130	3959	4312	2888	53	56	14	100	100	0	4252	4430	3066	89	94	59	100	100	0	0.938	0.981	0.987	1.008	1.270	0.952	0.974	120	576	8069	8600	-0.092	3906	4163	4259	4341	0
1	12	4	"YHL045W"	"YHL045W"	4920	15500	140	6374	6523	4292	54	241	2899	70	53	0	3749	4002	2714	90	178	1514	72	53	0	1.727	1.654	1.650	1.714	1.285	1.634	0.976	156	609	9979	10381	0.788	6320	3659	6469	3912	0
1	13	4	"SCW4"	"YGR279C"	5120	15500	140	3785	3857	2412	55	237	2868	56	33	0	1807	1818	1129	92	178	1498	52	12	0	2.175	2.203	2.304	2.285	1.280	2.009	0.962	156	622	5445	5528	1.121	3730	1715	3802	1726	0
1	14	4	"RPS20"	"YHL015W"	5330	15500	140	1953	2006	1260	55	57	15	100	100	0	3057	3064	1973	91	93	21	100	100	0	0.640	0.656	0.658	0.671	1.273	0.646	0.974	156	610	4864	4924	-0.644	1898	2966	1951	2973	0
1	15	4	"YHL047C"	"YHL047C"	5520	15510	140	5427	5905	3799	55	57	16	100	100	0	6393	7410	4723	90	91	18	100	100	0	0.852	0.799	0.800	0.787	1.318	0.798	0.969	156	531	11675	13170	-0.231	5372	6303	5850	7320	0
1	16	4	"YOR1"	"YGR281W"	5730	15510	140	4747	4557	2730	53	56	16	100	100	0	4294	4552	2789	90	92	19	100	100	0	1.117	1.009	1.022	1.037	1.253	0.998	0.973	156	562	8898	8966	0.159	4694	4204	4504	4462	0
1	17	4	"YHL017W"	"YHL017W"	5910	15510	140	3488	4313	2974	55	59	24	100	100	0	4971	6138	4069	91	95	28	100	100	0	0.703	0.704	0.711	0.686	1.293	0.716	0.974	156	624	8313	10305	-0.507	3433	4880	4258	6047	0
1	18	4	"YHL049C"	"YHL049C"	6130	15490	150	16950	19796	12153	57	62	27	100	100	0	8792	9026	5415	91	96	28	100	100	0	1.942	2.209	2.221	2.194	1.208	2.226	0.977	156	662	25594	28674	0.957	16893	8701	19739	8935	0
1	19	4	"YGR283C"	"YGR283C"	6320	15510	140	3433	3609	2154	53	56	17	100	100	0	4136	4510	2585	90	93	20	100	100	0	0.835	0.805	0.817	0.810	1.240	0.815	0.972	156	582	7426	7976	-0.259	3380	4046	3556	4420	0
1	20	4	"APM2"	"YHL019C"	6520	15510	140	5689	6029	3809	53	56	18	100	100	0	3315	3809	2322	94	98	29	100	100	0	1.750	1.609	1.625	1.618	1.280	1.633	0.970	156	622	8857	9691	0.807	5636	3221	5976	3715	0
1	21	4	"YHR001W"	"YHR001W"	6740	15490	150	1834	2273	1577	51	54	15	100	100	0	5224	7236	5058	90	93	26	100	100	0	0.347	0.311	0.307	0.305	1.252	0.307	0.978	156	880	6917	9368	-1.526	1783	5134	2222	7146	0
1	1	5	"YIL087C"	"YIL087C"	2720	15710	150	2978	3092	2058	54	58	22	100	100	0	1918	2275	1429	95	99	29	100	100	0	1.604	1.394	1.357	1.351	1.336	1.430	0.958	156	793	4747	5218	0.682	2924	1823	3038	2180	0
1	2	5	"RPI1"	"YIL119C"	2930	15700	150	2364	2493	1574	54	60	26	100	100	0	2580	3127	2014	94	101	39	100	100	0	0.929	0.804	0.795	0.809	1.412	0.792	0.956	156	619	4796	5472	-0.106	2310	2486	2439	3033	0
1	3	5	"YIL151C"	"YIL151C"	3120	15690	130	449	495	300	52	56	20	100	98	0	656	689	437	92	97	34	94	93	0	0.704	0.742	0.749	0.866	1.890	0.702	0.905	120	538	961	1040	-0.507	397	564	443	597	0
1	4	5	"YIL089W"	"YIL089W"	3320	15700	150	2072	2068	1255	54	56	15	100	100	0	3190	3413	2137	94	96	23	100	100	0	0.652	0.607	0.605	0.618	1.413	0.593	0.954	156	631	5114	5333	-0.617	2018	3096	2014	3319	0
1	5	5	"YIL121W"	"YIL121W"	3520	15700	140	3611	3771	2455	55	76	190	98	94	0	3015	3600	2507	95	124	325	92	84	0	1.218	1.060	1.023	1.119	1.569	1.027	0.953	156	574	6476	7221	0.284	3556	2920	3716	3505	0
1	6	5	"RRD1"	"YIL153W"	3720	15700	130	4411	4109	2001	55	83	230	100	98	0	4398	3966	1886	93	132	384	98	94	0	1.012	1.047	1.044	1.055	1.266	1.058	0.962	120	518	8661	7927	0.017	4356	4305	4054	3873	0
1	7	5	"YIL091C"	"YIL091C"	3920	15700	120	7316	6988	3832	55	59	32	100	100	0	7915	7212	3874	92	94	20	100	100	0	0.928	0.974	0.986	0.974	1.375	0.980	0.966	120	521	15084	14053	-0.108	7261	7823	6933	7120	0
1	8	5	"SIM1"	"YIL123W"	4130	15710	150	4320	5360	3623	56	59	27	100	100	0	3023	3535	2323	92	95	33	100	100	0	1.455	1.541	1.539	1.520	1.368	1.587	0.957	156	624	7195	8747	0.541	4264	2931	5304	3443	0
1	9	5	"GUT2"	"YIL155C"	4320	15710	140	3316	3467	2176	55	57	17	100	100	0	4714	4905	3097	92	94	24	100	100	0	0.706	0.709	0.690	0.706	1.374	0.702	0.965	156	532	7883	8225	-0.503	3261	4622	3412	4813	0
1	10	5	"YIL093C"	"YIL093C"	4520	15690	140	1608	2170	1572	54	57	17	100	100	0	1301	1611	1163	89	95	60	98	95	0	1.282	1.390	1.384	1.502	1.589	1.381	0.955	156	594	2766	3638	0.359	1554	1212	2116	1522	0
1	11	5	"KGD1"	"YIL125W"	4730	15700	130	3482	3801	2337	55	59	20	100	100	0	1801	2055	1307	90	96	58	100	96	0	2.003	1.906	1.932	2.062	1.452	1.896	0.956	120	612	5138	5711	1.002	3427	1711	3746	1965	0
1	12	5	"YIL157C"	"YIL157C"	4920	15690	130	2374	3020	2154	55	87	475	83	76	0	2010	2400	1778	92	97	37	100	98	0	1.209	1.285	1.267	1.356	1.578	1.305	0.891	120	563	4237	5273	0.274	2319	1918	2965	2308	0
1	13	5	"YJR026W"	"YJR026W"	5120	15700	120	12872	13382	9483	56	89	498	100	94	0	7012	6874	4543	92	98	39	100	100	0	1.852	1.965	1.966	1.998	1.373	2.030	0.951	120	513	19736	20108	0.889	12816	6920	13326	6782	0
1	14	5	"APS2"	"YJR058C"	5310	15700	120	2094	2050	1331	55	58	18	100	100	0	1503	1395	895	90	92	20	99	98	0	1.443	1.529	1.528	1.646	1.562	1.514	0.944	120	557	3452	3300	0.529	2039	1413	1995	1305	0
1	15	5	"JSN1"	"YJR091C"	5530	15690	130	460	517	319	54	58	17	100	99	0	332	345	165	90	91	19	94	90	0	1.678	1.816	1.814	1.895	1.706	1.898	0.858	120	569	648	718	0.746	406	242	463	255	0
1	16	5	"YJR028W"	"YJR028W"	5720	15700	120	7033	10232	10330	53	60	84	100	100	0	4141	5046	4414	90	94	49	100	100	0	1.723	2.054	1.966	1.998	1.351	2.239	0.960	120	496	11031	15135	0.785	6980	4051	10179	4956	0
1	17	5	"CBF1"	"YJR060W"	5920	15700	120	562	593	317	55	57	17	100	99	0	502	508	273	90	92	22	96	93	0	1.231	1.287	1.237	1.518	1.853	1.256	0.904	120	510	919	956	0.299	507	412	538	418	0
1	18	5	"FIP1"	"YJR093C"	6120	15700	120	663	816	543	57	61	22	99	99	0	845	1136	868	91	96	43	100	96	0	0.804	0.726	0.716	0.787	1.623	0.663	0.907	120	543	1360	1804	-0.315	606	754	759	1045	0
1	19	5	"YJR030C"	"YJR030C"	6320	15690	120	1732	1832	1566	54	60	42	100	99	0	1883	1969	1740	90	94	43	98	94	0	0.936	0.946	0.969	1.054	1.621	0.924	0.946	120	507	3471	3657	-0.096	1678	1793	1778	1879	0
1	20	5	"NTA1"	"YJR062C"	6520	15690	130	978	1046	786	53	57	38	100	100	0	1286	1445	1088	90	94	41	100	96	0	0.773	0.733	0.741	0.789	1.449	0.705	0.929	120	572	2121	2348	-0.371	925	1196	993	1355	0
1	21	5	"RPL43B"	"YJR094W-A"	6730	15700	120	3126	3084	1954	50	52	12	100	100	0	2795	2580	1539	88	92	27	100	100	0	1.136	1.217	1.228	1.250	1.324	1.257	0.950	120	621	5783	5526	0.184	3076	2707	3034	2492	0
1	1	6	"CPR7"	"YJR032W"	2740	15900	140	2258	2264	1521	55	60	23	100	99	0	2448	2469	1757	94	98	22	100	100	0	0.936	0.930	0.933	0.956	1.499	0.899	0.934	156	665	4557	4584	-0.096	2203	2354	2209	2375	0
1	2	6	"CCT5"	"YJR064W"	2930	15890	140	3149	3364	2241	55	62	25	100	100	0	2798	2977	1994	94	99	34	100	100	0	1.144	1.148	1.156	1.166	1.546	1.142	0.947	156	586	5798	6192	0.194	3094	2704	3309	2883	0
1	3	6	"YJR096W"	"YJR096W"	3130	15900	130	1907	1998	1354	53	57	16	100	100	0	1577	1660	1126	93	95	21	100	98	0	1.249	1.241	1.282	1.332	1.541	1.250	0.925	120	611	3338	3512	0.321	1854	1484	1945	1567	0
1	4	6	"YKR021W"	"YKR021W"	3330	15890	130	2063	2047	1045	55	59	21	100	100	0	2341	2238	1269	93	98	31	100	100	0	0.893	0.929	0.950	0.985	1.477	0.881	0.898	120	566	4256	4137	-0.163	2008	2248	1992	2145	0
1	5	6	"YSR3"	"YKR053C"	3510	15890	110	1778	2061	1449	59	103	261	91	83	0	2299	2633	2022	99	163	434	86	70	0	0.781	0.790	0.758	0.858	1.649	0.724	0.893	80	444	3919	4536	-0.356	1719	2200	2002	2534	0
1	6	6	"MRPL20"	"YKR085C"	3710	15890	150	54	63	31	63	883	2181	0	0	0	101	109	39	105	1056	2418	0	0	0	2.250	0.000	0.858	0.855	2.887	0.915	0.961	156	676	-13	4	1.170	-9	-4	0	4	-50
1	7	6	"YKR023W"	"YKR023W"	3910	15890	150	5307	5542	3292	61	851	2154	81	60	0	7064	7383	4333	101	1013	2380	83	66	0	0.753	0.753	0.755	0.795	1.574	0.796	0.948	156	694	12209	12763	-0.408	5246	6963	5481	7282	-50
1	8	6	"RHO4"	"YKR055W"	4130	15900	120	411	485	298	56	65	64	98	91	0	387	479	311	93	106	100	87	70	0	1.207	1.111	1.127	1.213	1.951	1.041	0.845	120	541	649	815	0.272	355	294	429	386	0
1	9	6	"YKR087C"	"YKR087C"	4330	15890	130	3225	2997	1695	55	58	19	100	100	0	6995	6347	3955	91	97	34	100	100	0	0.459	0.470	0.478	0.522	1.422	0.447	0.954	120	523	10074	9198	-1.123	3170	6904	2942	6256	0
1	10	6	"RPC37"	"YKR025W"	4510	15890	130	4448	4320	2378	55	58	18	100	100	0	2944	2766	1556	89	94	29	100	100	0	1.539	1.593	1.602	1.621	1.437	1.563	0.953	120	598	7248	6942	0.622	4393	2855	4265	2677	0
1	11	6	"RPS21A"	"YKR057W"	4730	15900	120	2843	2595	1433	55	59	21	100	100	0	1249	1192	617	90	93	21	99	98	0	2.406	2.305	2.295	2.331	1.494	2.388	0.913	120	585	3947	3642	1.266	2788	1159	2540	1102	0
1	12	6	"YKR089C"	"YKR089C"	4930	15890	130	465	517	313	55	82	450	46	5	0	459	493	285	90	95	34	95	90	0	1.111	1.146	1.202	1.313	1.923	4.451	0.232	120	629	779	865	0.152	410	369	462	403	0
1	13	6	"YKR027W"	"YKR027W"	5140	15900	140	6045	5720	3346	55	79	436	96	91	0	2900	2833	1619	90	94	31	100	100	0	2.132	2.065	1.998	2.015	1.483	2.106	0.942	156	669	8800	8408	1.092	5990	2810	5665	2743	0
1	14	6	"TIF1"	"YKR059W"	5340	15900	130	2864	2811	1714	53	55	14	100	100	0	1913	1789	1016	90	99	125	92	87	0	1.542	1.623	1.612	1.792	1.675	1.662	0.925	120	583	4634	4457	0.625	2811	1823	2758	1699	0
1	15	6	"SRL3"	"YKR091W"	5530	15890	130	2255	2124	1133	53	60	76	100	99	0	1410	1249	703	90	100	130	93	85	0	1.668	1.787	1.823	1.942	1.450	1.733	0.922	120	597	3522	3230	0.738	2202	1320	2071	1159	0
1	16	6	"YLR232W"	"YLR232W"	5730	15890	120	1376	1198	682	53	61	81	93	89	0	858	771	407	90	93	48	90	87	0	1.723	1.681	1.670	1.759	1.570	1.687	0.934	120	528	2091	1826	0.785	1323	768	1145	681	0
1	17	6	"RPS28B"	"YLR264W"	5920	15890	130	1413	1579	1023	53	57	23	100	100	0	1141	1231	814	87	91	24	98	96	0	1.290	1.334	1.331	1.483	1.648	1.296	0.940	120	597	2414	2670	0.368	1360	1054	1526	1144	0
1	18	6	"ATP14"	"YLR295C"	6130	15890	130	1951	1712	1025	54	59	25	100	100	0	716	682	373	87	93	42	98	89	0	3.016	2.787	2.779	2.810	1.523	2.862	0.902	120	596	2526	2253	1.593	1897	629	1658	595	0
1	19	6	"TOP3"	"YLR234W"	6330	15900	140	3724	3748	2145	53	59	36	100	100	0	1508	1448	846	88	94	49	99	96	0	2.585	2.717	2.710	2.974	1.721	2.721	0.939	156	709	5091	5055	1.370	3671	1420	3695	1360	0
1	20	6	"YLR266C"	"YLR266C"	6540	15890	130	1619	1571	831	54	57	37	100	100	0	1569	1451	779	89	93	41	100	99	0	1.057	1.114	1.113	1.150	1.446	1.072	0.915	120	609	3045	2879	0.081	1565	1480	1517	1362	0
1	21	6	"YLR297W"	"YLR297W"	6740	15900	140	1737	1867	1284	51	53	13	100	100	0	701	756	494	87	89	21	98	94	0	2.746	2.714	2.653	2.770	1.594	2.752	0.915	156	782	2300	2485	1.457	1686	614	1816	669	0
1	1	7	"YLR236C"	"YLR236C"	2740	16100	150	769	702	406	58	66	48	96	92	0	475	462	248	97	103	54	89	78	0	1.881	1.764	1.712	1.852	1.745	1.768	0.883	156	774	1089	1009	0.911	711	378	644	365	0
1	2	7	"SEC22"	"YLR268W"	2920	16100	130	3762	3363	1474	58	72	74	100	99	0	2648	2248	1049	95	106	72	100	97	0	1.451	1.535	1.478	1.592	1.555	1.525	0.926	120	581	6257	5458	0.537	3704	2553	3305	2153	0
1	3	7	"ECM38"	"YLR299W"	3150	16110	140	5535	5015	3304	58	66	51	100	100	0	2465	2540	1564	94	104	108	100	94	0	2.310	2.027	1.991	1.961	1.517	2.111	0.915	156	647	7848	7403	1.208	5477	2371	4957	2446	0
1	4	7	"YLR238W"	"YLR238W"	3340	16100	140	5961	5701	3702	58	65	31	100	100	0	3934	3782	2299	95	105	106	100	98	0	1.538	1.531	1.531	1.443	1.501	1.591	0.925	156	636	9742	9330	0.621	5903	3839	5643	3687	0
1	5	7	"YLR270W"	"YLR270W"	3540	16090	130	4558	4098	2354	61	77	131	100	97	0	3394	3058	1899	99	126	231	94	88	0	1.365	1.364	1.332	1.448	1.568	1.326	0.916	120	612	7792	6996	0.449	4497	3295	4037	2959	0
1	6	7	"YLR301W"	"YLR301W"	3740	16100	130	2466	2333	1206	64	869	2248	52	0	0	2259	2286	1166	100	1031	2484	40	0	0	1.113	1.038	1.060	1.047	1.472	0.969	0.941	120	607	4561	4455	0.154	2402	2159	2269	2186	0
1	7	7	"MPT1"	"YMR005W"	3940	16100	120	1791	2010	1592	60	667	2063	41	6	0	6863	8311	6336	95	815	2294	76	59	0	0.256	0.237	0.229	0.238	1.646	0.225	0.798	120	545	8499	10166	-1.967	1731	6768	1950	8216	0
1	8	7	"MIH1"	"YMR036C"	4140	16100	120	680	718	436	56	59	19	98	96	0	899	930	590	90	93	22	95	92	0	0.771	0.788	0.837	0.887	1.735	0.752	0.896	120	544	1433	1502	-0.375	624	809	662	840	0
1	9	7	"YMR067C"	"YMR067C"	4330	16090	120	716	681	333	55	59	19	100	100	0	1283	1162	645	90	94	31	97	93	0	0.554	0.584	0.612	0.681	1.812	0.548	0.891	120	558	1854	1698	-0.852	661	1193	626	1072	0
1	10	7	"YMR007W"	"YMR007W"	4530	16100	130	1510	1360	750	54	57	16	100	100	0	1588	1346	720	88	90	19	99	98	0	0.971	1.038	1.042	1.095	1.704	1.045	0.942	120	631	2956	2564	-0.043	1456	1500	1306	1258	0
1	11	7	"LYS7"	"YMR038C"	4730	16100	120	3016	2699	1619	54	56	15	100	100	0	1373	1159	661	88	93	60	91	83	0	2.305	2.470	2.525	2.646	1.620	2.559	0.910	120	539	4247	3716	1.205	2962	1285	2645	1071	0
1	12	7	"YMR069W"	"YMR069W"	4940	16100	130	541	559	350	54	57	22	96	91	0	298	290	163	88	94	57	72	66	0	2.319	2.500	2.516	2.478	2.154	2.539	0.861	120	634	697	707	1.214	487	210	505	202	0
1	13	7	"YMR009W"	"YMR009W"	5140	16100	130	1578	1603	984	53	55	13	100	100	0	755	703	401	87	90	20	98	94	0	2.283	2.516	2.610	2.641	1.585	2.705	0.899	120	579	2193	2166	1.191	1525	668	1550	616	0
1	14	7	"YMR040W"	"YMR040W"	5330	16100	130	742	811	519	53	55	14	100	100	0	498	555	345	90	98	124	76	61	0	1.689	1.630	1.702	1.809	1.698	1.646	0.901	120	583	1097	1223	0.756	689	408	758	465	0
1	15	7	"YMR071C"	"YMR071C"	5530	16090	130	1572	1652	958	53	56	16	100	100	0	1363	1408	832	93	101	121	97	89	0	1.196	1.216	1.244	1.303	1.573	1.191	0.900	120	631	2789	2914	0.258	1519	1270	1599	1315	0
1	16	7	"HXT2"	"YMR011W"	5730	16090	130	5630	5620	3510	55	59	20	100	100	0	5083	5167	3283	89	92	21	100	100	0	1.116	1.096	1.067	1.099	1.529	1.081	0.930	120	627	10569	10643	0.159	5575	4994	5565	5078	0
1	17	7	"ARG80"	"YMR042W"	5930	16090	130	3609	2911	1835	54	59	25	100	99	0	1348	1092	696	86	92	53	88	83	0	2.817	2.840	2.847	3.125	1.718	2.785	0.913	120	613	4817	3863	1.494	3555	1262	2857	1006	0
1	18	7	"YMR073C"	"YMR073C"	6120	16090	120	3797	3207	1429	52	55	17	100	100	0	2500	2078	993	87	92	68	99	95	0	1.552	1.585	1.578	1.668	1.627	1.572	0.922	120	573	6158	5146	0.634	3745	2413	3155	1991	0
1	19	7	"YNL047C"	"YNL047C"	6330	16110	140	3983	3824	2383	51	54	14	100	100	0	3640	3588	2241	85	90	45	100	100	0	1.106	1.077	1.061	1.090	1.667	1.074	0.926	156	622	7487	7276	0.145	3932	3555	3773	3503	0
1	20	7	"YNL080C"	"YNL080C"	6540	16110	150	3140	3099	2116	53	55	14	100	100	0	3162	3386	2234	88	89	18	100	100	0	1.004	0.924	0.929	0.892	1.561	0.929	0.929	156	688	6161	6344	0.006	3087	3074	3046	3298	0
1	21	7	"DBP2"	"YNL112W"	6750	16110	140	2766	3061	2011	51	53	15	100	100	0	2284	2523	1641	86	87	18	100	100	0	1.235	1.235	1.237	1.237	1.539	1.240	0.904	156	757	4913	5447	0.305	2715	2198	3010	2437	0
1	1	8	"SFB2"	"YNL049C"	2740	16300	150	539	639	455	54	60	42	93	89	0	612	693	491	90	97	49	89	82	0	0.929	0.970	0.981	1.103	1.656	0.948	0.937	156	790	1007	1188	-0.106	485	522	585	603	0
1	2	8	"PMS1"	"YNL082W"	2950	16310	140	2351	2332	1405	55	66	71	100	98	0	4030	3927	2410	88	99	70	100	98	0	0.582	0.593	0.591	0.614	1.324	0.585	0.964	156	611	6238	6116	-0.780	2296	3942	2277	3839	0
1	3	8	"YNL114C"	"YNL114C"	3130	16300	130	2548	2198	1154	55	58	17	100	100	0	1480	1298	677	88	103	208	85	79	0	1.791	1.771	1.753	1.859	1.368	1.747	0.897	120	490	3885	3353	0.841	2493	1392	2143	1210	0
1	4	8	"YNL051W"	"YNL051W"	3330	16300	140	3197	2988	1790	56	61	28	100	100	0	3976	4232	2511	92	104	181	99	96	0	0.809	0.708	0.707	0.706	1.284	0.712	0.966	156	650	7025	7072	-0.306	3141	3884	2932	4140	0
1	5	8	"END3"	"YNL084C"	3560	16290	130	3294	2849	1555	56	63	33	100	100	0	4428	4325	2414	93	97	32	100	100	0	0.747	0.660	0.661	0.678	1.313	0.649	0.956	120	608	7573	7025	-0.421	3238	4335	2793	4232	0
1	6	8	"YNL116W"	"YNL116W"	3750	16310	140	4487	4804	3114	56	61	33	100	100	0	4795	5255	3398	89	92	24	100	100	0	0.942	0.919	0.911	0.926	1.340	0.915	0.957	156	621	9137	9914	-0.087	4431	4706	4748	5166	0
1	7	8	"MSG5"	"YNL053W"	3940	16290	130	3974	3881	2437	56	60	22	100	100	0	2194	2307	1525	88	91	22	100	100	0	1.860	1.724	1.739	1.826	1.410	1.691	0.943	120	560	6024	6044	0.896	3918	2106	3825	2219	0
1	8	8	"YNL086W"	"YNL086W"	4150	16300	130	4373	4537	2978	56	60	24	100	100	0	3031	2637	1698	88	92	28	100	100	0	1.467	1.758	1.770	1.773	1.379	1.782	0.954	120	611	7260	7030	0.553	4317	2943	4481	2549	0
1	9	8	"DCP2"	"YNL118C"	4340	16300	120	5157	4783	2542	54	59	22	100	100	0	3163	2902	1584	89	92	28	100	100	0	1.660	1.681	1.656	1.722	1.318	1.673	0.960	120	543	8177	7542	0.731	5103	3074	4729	2813	0
1	10	8	"CMK2"	"YOL016C"	4540	16300	130	649	748	544	54	55	15	100	99	0	947	1012	779	89	90	20	99	99	0	0.693	0.752	0.737	0.823	1.523	0.720	0.937	120	596	1453	1617	-0.528	595	858	694	923	0
1	11	8	"YOL048C"	"YOL048C"	4750	16290	140	1430	1780	1317	54	58	25	100	100	0	2207	2885	2288	89	95	57	100	99	0	0.650	0.617	0.617	0.664	1.694	0.589	0.943	156	680	3494	4522	-0.622	1376	2118	1726	2796	0
1	12	8	"YOL080C"	"YOL080C"	4930	16280	110	2027	2182	1628	54	94	250	83	77	0	1920	2078	1576	89	129	249	81	73	0	1.078	1.070	1.114	1.125	1.391	1.048	0.943	80	464	3804	4117	0.108	1973	1831	2128	1989	0
1	13	8	"TLG2"	"YOL018C"	5130	16300	120	5191	4532	2383	54	85	221	99	95	0	4557	3836	2042	89	120	221	100	90	0	1.150	1.195	1.181	1.227	1.321	1.193	0.965	120	593	9605	8225	0.201	5137	4468	4478	3747	0
1	14	8	"YOL050C"	"YOL050C"	5340	16290	130	1086	952	576	52	54	14	100	99	0	1029	913	569	88	90	20	98	94	0	1.099	1.091	1.106	1.227	1.527	1.056	0.942	120	644	1975	1725	0.136	1034	941	900	825	0
1	15	8	"YOL082W"	"YOL082W"	5560	16300	130	3539	3365	1841	52	55	17	100	100	0	1151	1068	554	90	92	22	96	95	0	3.287	3.388	3.461	3.579	1.348	3.449	0.949	120	605	4548	4291	1.717	3487	1061	3313	978	0
1	16	8	"TAT2"	"YOL020W"	5740	16310	140	4001	4250	2765	54	57	18	100	100	0	1973	2221	1430	90	92	20	100	99	0	2.096	1.969	1.903	1.978	1.469	1.983	0.955	156	637	5830	6327	1.068	3947	1883	4196	2131	0
1	17	8	"SPE2"	"YOL052C"	5940	16300	130	5794	4993	2509	53	57	22	100	100	0	1956	1757	1064	89	93	52	98	95	0	3.075	2.962	3.197	3.156	1.389	2.930	0.873	120	611	7608	6608	1.621	5741	1867	4940	1668	0
1	18	8	"YOL084W"	"YOL084W"	6140	16310	130	3591	3286	1515	52	54	18	100	100	0	1488	1341	611	89	94	68	99	95	0	2.530	2.583	2.537	2.640	1.299	2.647	0.950	120	576	4938	4486	1.339	3539	1399	3234	1252	0
1	19	8	"YOL022C"	"YOL022C"	6330	16300	140	2146	2335	1521	51	53	12	100	100	0	5112	5652	3683	86	90	46	100	100	0	0.417	0.410	0.405	0.416	1.493	0.404	0.952	156	590	7121	7850	-1.262	2095	5026	2284	5566	0
1	20	8	"YOL053W"	"YOL053W"	6520	16290	130	3801	3930	2485	52	55	18	100	100	0	2750	2760	1777	88	90	21	100	100	0	1.408	1.451	1.444	1.506	1.374	1.450	0.953	120	588	6411	6550	0.494	3749	2662	3878	2672	0
1	21	8	"ADH1"	"YOL086C"	6750	16300	130	2641	3117	2084	51	54	17	100	100	0	1087	1163	755	86	89	20	99	97	0	2.587	2.847	2.866	2.918	1.438	2.911	0.945	120	691	3591	4143	1.372	2590	1001	3066	1077	0
1	1	9	"RPL33B"	"YOR234C"	2720	16500	150	1302	1446	992	52	54	14	100	99	0	2678	3349	2428	89	92	27	100	100	0	0.483	0.428	0.407	0.438	1.389	0.412	0.961	156	869	3839	4654	-1.050	1250	2589	1394	3260	0
1	2	9	"PNT1"	"YOR266W"	2940	16480	110	312	318	187	52	55	16	95	90	0	634	617	440	87	93	35	81	75	0	0.475	0.502	0.473	0.615	2.236	0.441	0.904	80	463	807	796	-1.073	260	547	266	530	0
1	3	9	"YOR298W"	"YOR298W"	3130	16490	130	303	333	164	52	53	13	98	98	0	391	394	206	86	98	163	71	43	0	0.823	0.912	0.925	1.012	1.740	0.847	0.835	120	568	556	589	-0.281	251	305	281	308	0
1	4	9	"DFR1"	"YOR236W"	3330	16490	120	1560	1687	1081	53	55	16	100	100	0	969	1167	777	88	96	162	85	80	0	1.711	1.514	1.508	1.666	1.483	1.467	0.957	120	559	2388	2713	0.774	1507	881	1634	1079	0
1	5	9	"YOR268C"	"YOR268C"	3550	16490	120	692	691	399	53	56	19	98	97	0	401	406	215	88	91	22	90	87	0	2.042	2.006	1.998	2.181	1.665	1.981	0.938	120	595	952	956	1.030	639	313	638	318	0
1	6	9	"YOR300W"	"YOR300W"	3720	16490	110	670	632	295	54	57	18	100	100	0	552	492	236	87	90	22	93	93	0	1.325	1.427	1.441	1.587	1.508	1.344	0.927	80	429	1081	983	0.406	616	465	578	405	0
1	7	9	"YOR238W"	"YOR238W"	3940	16490	140	1138	1342	974	54	58	20	100	100	0	670	868	624	87	91	21	97	96	0	1.859	1.649	1.614	1.718	1.472	1.627	0.953	156	717	1667	2069	0.895	1084	583	1288	781	0
1	8	9	"VPH1"	"YOR270C"	4140	16500	120	1174	1125	715	53	56	20	100	100	0	1392	1333	875	88	90	22	100	98	0	0.860	0.861	0.882	0.957	1.453	0.841	0.948	120	535	2425	2317	-0.218	1121	1304	1072	1245	0
1	9	9	"YOR302W"	"YOR302W"	4330	16490	120	436	430	213	53	56	16	100	97	0	336	335	160	89	90	21	94	88	0	1.551	1.533	1.543	1.650	1.487	1.476	0.905	120	526	630	623	0.633	383	247	377	246	0
1	10	9	"YOR240W"	"YOR240W"	4540	16490	130	2837	2756	1776	54	55	14	100	100	0	2249	2423	1647	88	90	20	100	100	0	1.288	1.157	1.173	1.218	1.318	1.130	0.969	120	563	4944	5037	0.365	2783	2161	2702	2335	0
1	11	9	"YTM1"	"YOR272W"	4720	16500	120	2657	2422	1400	54	60	54	100	100	0	3100	2780	1705	89	92	22	100	100	0	0.864	0.880	0.882	0.939	1.348	0.856	0.969	120	497	5614	5059	-0.210	2603	3011	2368	2691	0
1	12	9	"YOR304C-A"	"YOR304C-A"	4930	16510	140	900	883	545	53	81	204	82	65	0	1796	1944	1257	89	116	208	93	84	0	0.496	0.447	0.445	0.462	1.495	0.437	0.963	156	651	2554	2685	-1.011	847	1707	830	1855	0
1	13	9	"GRE1"	"YPL223C"	5130	16500	120	4494	3665	1846	54	58	21	100	100	0	1628	1359	680	89	92	22	98	98	0	2.885	2.843	2.891	3.019	1.390	2.837	0.970	120	536	5979	4881	1.529	4440	1539	3611	1270	0
1	14	9	"BBP1"	"YPL255W"	5350	16490	130	4453	4386	2621	53	56	19	100	100	0	1769	1934	1208	87	90	22	100	99	0	2.616	2.346	2.352	2.497	1.320	2.316	0.973	120	607	6082	6180	1.387	4400	1682	4333	1847	0
1	15	9	"YPR004C"	"YPR004C"	5540	16500	120	3222	2932	1342	53	54	13	100	100	0	3289	2931	1449	88	90	19	100	100	0	0.990	1.013	1.040	1.061	1.258	0.991	0.974	120	513	6370	5722	-0.014	3169	3201	2879	2843	0
1	16	9	"YPL225W"	"YPL225W"	5740	16490	130	2286	1988	1248	52	55	14	100	100	0	4722	3797	2546	88	91	19	100	100	0	0.482	0.522	0.530	0.546	1.340	0.500	0.969	120	573	6868	5645	-1.053	2234	4634	1936	3709	0
1	17	9	"YPL257W"	"YPL257W"	5940	16500	120	1483	1272	701	50	53	13	100	100	0	1363	1201	673	86	90	41	95	90	0	1.122	1.096	1.104	1.156	1.343	1.078	0.957	120	544	2710	2337	0.166	1433	1277	1222	1115	0
1	18	9	"ICL2"	"YPR006C"	6140	16490	130	5728	5439	3475	51	53	12	100	100	0	3817	3671	2486	87	89	20	100	100	0	1.522	1.503	1.496	1.615	1.379	1.462	0.969	120	609	9407	8972	0.606	5677	3730	5388	3584	0
1	19	9	"ALG5"	"YPL227C"	6350	16500	130	2201	2138	1360	50	52	12	100	100	0	4030	3911	2578	85	87	20	100	100	0	0.545	0.546	0.547	0.556	1.335	0.541	0.976	120	597	6096	5914	-0.875	2151	3945	2088	3826	0
1	20	9	"APM1"	"YPL259C"	6540	16510	130	4183	3495	1765	52	53	12	100	100	0	7643	6467	3202	87	89	20	100	100	0	0.547	0.540	0.532	0.532	1.286	0.540	0.975	120	594	11687	9823	-0.871	4131	7556	3443	6380	0
1	21	9	"YPR008W"	"YPR008W"	6740	16510	140	4224	3954	2630	51	53	14	100	100	0	4275	4177	2808	85	87	19	100	100	0	0.996	0.954	0.937	0.944	1.323	0.947	0.976	156	804	8363	7995	-0.006	4173	4190	3903	4092	0
1	1	10	"YPL229W"	"YPL229W"	2760	16690	150	6769	6209	4124	52	56	20	100	100	0	3917	3566	2323	90	93	28	100	99	0	1.755	1.771	1.717	1.776	1.560	1.791	0.960	156	807	10544	9633	0.812	6717	3827	6157	3476	0
1	2	10	"YPL261C"	"YPL261C"	2960	16690	130	903	854	413	52	54	17	100	99	0	841	740	346	88	94	41	90	89	0	1.130	1.230	1.240	1.397	1.735	1.231	0.942	120	594	1604	1454	0.177	851	753	802	652	0
1	3	10	"RPA135"	"YPR010C"	3150	16680	120	5229	4471	2560	52	54	16	100	100	0	6547	5569	3289	87	92	38	100	100	0	0.801	0.806	0.797	0.826	1.510	0.790	0.946	120	549	11637	9901	-0.319	5177	6460	4419	5482	0
1	4	10	"SEC7"	"YDR170C"	3340	16680	100	232	338	308	53	57	18	96	91	0	228	335	353	88	93	26	78	71	0	1.279	1.154	1.063	1.267	2.346	0.939	0.752	80	474	319	532	0.355	179	140	285	247	0
1	5	10	"YRF1-1"	"YDR545W"	3550	16690	80	116	278	467	52	55	18	82	71	0	140	264	432	87	89	22	65	53	0	1.208	1.277	1.019	1.219	3.043	1.107	0.930	52	310	117	403	0.272	64	53	226	177	0
1	6	10	"SWI4"	"YER111C"	3730	16690	150	63	106	179	53	56	16	34	19	0	99	129	175	86	90	26	25	12	0	0.769	1.233	0.960	0.964	3.946	1.018	0.815	156	786	23	96	-0.379	10	13	53	43	-50
1	7	10	"ESP1"	"YGR098C"	3940	16670	80	97	239	448	55	59	21	67	50	0	123	189	251	87	90	23	57	36	0	1.167	1.804	1.504	1.360	4.370	1.812	0.730	52	316	78	286	0.222	42	36	184	102	0
1	8	10	"RIM101"	"YHL027W"	4130	16680	80	105	141	130	53	56	23	65	53	0	111	130	92	88	90	21	50	32	0	2.261	2.095	1.692	1.673	2.905	1.606	0.497	52	320	75	130	1.177	52	23	88	42	0
1	9	10	"MIP6"	"YHR015W"	4330	16690	150	61	83	80	52	54	16	35	20	0	97	114	81	87	89	19	37	20	0	0.900	1.148	0.754	0.705	3.206	0.977	0.664	156	735	19	58	-0.152	9	10	31	27	-50
1	10	10	"VTH1"	"YIL173W"	4530	16690	150	62	85	108	53	55	16	32	20	0	95	111	77	87	90	20	31	15	0	1.125	1.333	0.738	0.729	3.405	1.466	0.540	156	645	17	56	0.170	9	8	32	24	-50
1	11	10	"YJR029W"	"YJR029W"	4730	16690	150	67	104	127	54	60	52	18	10	0	99	129	122	88	92	23	37	16	0	1.182	1.220	0.818	0.945	3.380	1.370	0.457	156	573	24	91	0.241	13	11	50	41	-50
1	12	10	"YLL034C"	"YLL034C"	4930	16690	150	62	95	130	54	61	53	14	9	0	96	121	141	89	94	26	27	10	0	1.143	1.281	0.698	0.820	3.650	0.895	0.642	156	569	15	73	0.193	8	7	41	32	-50
1	13	10	"ESC1"	"YMR219W"	5130	16690	150	63	79	57	54	57	19	30	19	0	98	109	51	88	91	24	25	13	0	0.900	1.190	0.960	0.896	3.243	1.096	0.395	156	599	19	46	-0.152	9	10	25	21	-50
1	14	10	"YKU70"	"YMR284W"	5330	16690	150	60	110	192	54	56	19	29	19	0	90	135	224	86	89	21	28	14	0	1.500	1.143	1.000	0.960	4.203	0.862	0.860	156	654	10	105	0.585	6	4	56	49	-50
1	15	10	"POL1"	"YNL102W"	5530	16690	150	59	69	34	54	55	15	30	16	0	91	98	37	88	91	21	30	13	0	1.667	1.500	0.900	0.895	3.811	0.069	0.773	156	714	8	25	0.737	5	3	15	10	-50
1	16	10	"YMRWdelta20"	"YMRWdelta20"	5750	16700	130	572	555	266	53	55	15	100	100	0	578	546	251	87	90	22	95	93	0	1.057	1.094	1.127	1.197	1.798	1.094	0.887	120	629	1010	961	0.080	519	491	502	459	0
1	17	10	"IntYNL112W"	"IntYNL112W"	5940	16690	130	1522	1468	850	52	54	14	100	100	0	1610	1493	856	84	88	40	97	97	0	0.963	1.005	0.959	1.082	1.554	0.987	0.928	120	583	2996	2825	-0.054	1470	1526	1416	1409	0
1	18	10	"CEN14"	"CEN14"	6140	16700	120	278	266	115	50	53	15	96	95	0	614	580	328	85	88	19	94	91	0	0.431	0.436	0.422	0.511	2.107	0.379	0.825	120	545	757	711	-1.214	228	529	216	495	0
1	19	10	"YORCdelta11"	"YORCdelta11"	6340	16700	120	1043	998	504	50	52	13	100	100	0	873	806	411	84	85	18	98	97	0	1.259	1.313	1.324	1.422	1.671	1.298	0.916	120	517	1782	1670	0.332	993	789	948	722	0
1	20	10	"YORWdelta16"	"YORWdelta16"	6540	16700	120	479	479	192	50	51	11	100	100	0	554	552	241	86	89	58	93	90	0	0.917	0.921	0.895	1.015	1.758	0.844	0.764	120	574	897	895	-0.126	429	468	429	466	0
1	21	10	"YOR298C-A"	"YOR298C-A"	6750	16690	110	440	443	221	52	52	11	100	98	0	456	444	235	84	85	18	91	90	0	1.043	1.086	1.131	1.222	1.889	1.042	0.888	80	520	760	751	0.061	388	372	391	360	0
1	1	11	"YPLCdelta10"	"YPLCdelta10"	2730	16900	140	1443	1512	922	53	69	275	95	84	0	1747	1878	1118	91	98	87	97	94	0	0.839	0.816	0.789	0.850	1.572	0.858	0.809	156	780	3046	3246	-0.253	1390	1656	1459	1787	0
1	2	11	"YPRCdelta13"	"YPRCdelta13"	2950	16890	140	504	576	376	52	55	19	98	96	0	1211	1508	1081	87	89	23	100	100	0	0.402	0.369	0.380	0.383	1.826	0.341	0.878	156	682	1576	1945	-1.314	452	1124	524	1421	0
1	3	11	"SNR51"	"SNR51"	3150	16890	120	491	474	245	53	55	19	99	92	0	471	452	223	85	91	44	87	85	0	1.135	1.147	1.135	1.258	2.313	1.124	0.827	120	555	824	788	0.182	438	386	421	367	0
1	4	11	"iYAL068C-0"	"iYAL068C-0"	3350	16890	120	1327	1387	922	53	56	16	100	100	0	1177	1174	745	88	92	26	99	98	0	1.170	1.228	1.169	1.279	1.859	1.252	0.863	120	589	2363	2420	0.226	1274	1089	1334	1086	0
1	5	11	"iYAL067C"	"iYAL067C"	3560	16890	140	1672	1735	1098	52	54	17	100	100	0	2135	2195	1396	87	91	34	100	99	0	0.791	0.798	0.775	0.819	1.879	0.782	0.872	156	734	3668	3791	-0.338	1620	2048	1683	2108	0
1	6	11	"iYAL064C-A-0"	"iYAL064C-A-0"	3780	16890	130	3726	3215	1871	53	55	15	100	100	0	4144	3696	2354	86	90	28	100	100	0	0.905	0.876	0.886	0.949	1.871	0.823	0.899	120	573	7731	6772	-0.144	3673	4058	3162	3610	0
1	7	11	"iYBR065C"	"iYBR065C"	3950	16890	120	1322	1173	608	54	56	16	100	99	0	875	764	376	83	86	19	96	95	0	1.601	1.643	1.670	1.800	1.885	1.700	0.867	120	578	2060	1800	0.679	1268	792	1119	681	0
1	8	11	"iYBR069C"	"iYBR069C"	4150	16890	130	1256	1210	674	53	56	17	100	100	0	1259	1166	675	84	88	21	99	99	0	1.024	1.069	1.037	1.122	1.928	1.047	0.813	120	696	2378	2239	0.034	1203	1175	1157	1082	0
1	9	11	"iYBR073W"	"iYBR073W"	4350	16900	130	1140	1045	599	52	55	18	100	100	0	1132	1122	684	85	88	19	99	98	0	1.039	0.958	0.938	1.036	1.918	0.920	0.842	120	631	2135	2030	0.055	1088	1047	993	1037	0
1	10	11	"iYBR085W-1"	"iYBR085W-1"	4560	16890	130	2209	2154	1281	53	59	55	100	97	0	1651	1678	1096	87	90	36	100	97	0	1.379	1.321	1.345	1.445	1.912	1.265	0.837	120	582	3720	3692	0.463	2156	1564	2101	1591	0
1	11	11	"iYBR089W"	"iYBR089W"	4750	16890	140	2967	3123	2119	56	253	1366	69	52	0	2731	2647	1839	90	128	254	91	81	0	1.102	1.199	1.200	1.234	1.993	1.614	0.614	156	627	5552	5624	0.140	2911	2641	3067	2557	0
1	12	11	"iYBR093C"	"iYBR093C"	4950	16890	130	809	813	396	56	276	1447	2	0	0	523	504	235	91	133	268	68	33	0	1.743	1.833	1.914	1.996	1.872	6.409	0.492	120	557	1185	1170	0.802	753	432	757	413	0
1	13	11	"iYBR111C"	"iYBR111C"	5150	16890	140	4159	3947	2430	55	61	47	99	99	0	4956	4583	2984	89	92	27	100	100	0	0.843	0.866	0.890	0.874	1.946	0.837	0.889	156	641	8971	8386	-0.246	4104	4867	3892	4494	0
1	14	11	"iYBR117C"	"iYBR117C"	5350	16900	130	2958	3022	1908	55	58	32	100	100	0	2506	2363	1462	87	90	21	100	99	0	1.200	1.304	1.320	1.397	1.699	1.349	0.825	120	558	5322	5243	0.263	2903	2419	2967	2276	0
1	15	11	"iYBR121C"	"iYBR121C"	5550	16900	130	2265	2278	1302	54	57	18	100	100	0	1946	1821	1052	88	91	25	100	100	0	1.190	1.283	1.293	1.382	1.796	1.301	0.876	120	630	4069	3957	0.251	2211	1858	2224	1733	0
1	16	11	"iYBR139W"	"iYBR139W"	5760	16900	130	464	463	196	53	56	17	100	99	0	1569	1441	693	87	89	26	100	100	0	0.277	0.303	0.301	0.321	1.791	0.273	0.803	120	614	1893	1764	-1.850	411	1482	410	1354	0
1	17	11	"iYBR143C"	"iYBR143C"	5950	16890	120	1404	1349	722	53	54	14	100	100	0	936	901	498	84	86	21	99	96	0	1.586	1.586	1.592	1.733	1.868	1.594	0.880	120	587	2203	2113	0.665	1351	852	1296	817	0
1	18	11	"iYBR147W"	"iYBR147W"	6170	16880	130	1115	1210	833	52	54	17	98	96	0	768	733	498	85	86	20	93	89	0	1.556	1.787	1.828	1.995	2.039	1.781	0.819	120	561	1746	1806	0.638	1063	683	1158	648	0
1	19	11	"iYDL240W"	"iYDL240W"	6340	16890	140	589	573	309	51	53	15	98	98	0	2119	2282	1492	84	86	18	100	100	0	0.264	0.237	0.229	0.260	2.109	0.204	0.823	156	621	2573	2720	-1.919	538	2035	522	2198	0
1	20	11	"iYDL236W"	"iYDL236W"	6540	16900	120	351	336	152	49	51	12	99	98	0	472	450	192	85	113	361	52	1	0	0.780	0.786	0.762	0.803	1.893	0.129	0.116	120	568	689	652	-0.358	302	387	287	365	0
1	21	11	"iYDL232W"	"iYDL232W"	6760	16900	120	435	460	249	50	52	13	100	100	0	1154	1155	704	86	109	332	80	62	0	0.360	0.384	0.404	0.424	1.793	0.259	0.623	120	658	1453	1479	-1.472	385	1068	410	1069	0
1	1	12	"iYDL216C"	"iYDL216C"	2740	17100	150	205	222	109	53	57	19	95	90	0	274	303	162	89	91	22	89	84	0	0.822	0.790	0.786	0.862	1.794	0.739	0.825	156	833	337	383	-0.283	152	185	169	214	0
1	2	12	"iYDL212W"	"iYDL212W"	2960	17090	120	374	378	171	53	55	18	99	96	0	393	388	188	85	88	24	90	88	0	1.042	1.073	1.023	1.236	2.014	1.021	0.861	120	559	629	628	0.060	321	308	325	303	0
1	3	12	"itG(GCC)D1"	"itG(GCC)D1"	3160	17090	120	978	993	644	53	55	20	99	96	0	667	656	407	84	89	42	92	85	0	1.587	1.643	1.637	1.763	1.668	1.647	0.893	120	578	1508	1512	0.666	925	583	940	572	0
1	4	12	"iYDL195W"	"iYDL195W"	3360	17090	130	905	862	508	54	62	36	98	94	0	784	712	435	89	99	60	88	82	0	1.224	1.297	1.315	1.462	1.734	1.217	0.855	120	599	1546	1431	0.292	851	695	808	623	0
1	5	12	"iYDL191W"	"iYDL191W"	3550	17100	120	521	521	273	55	62	39	96	95	0	1451	1309	711	92	102	68	95	91	0	0.343	0.383	0.385	0.413	1.865	0.368	0.896	120	498	1825	1683	-1.544	466	1359	466	1217	0
1	6	12	"iYDL186W"	"iYDL186W"	3730	17090	130	710	710	411	52	55	17	99	97	0	419	445	262	88	90	21	90	88	0	1.988	1.843	1.876	1.987	1.631	1.763	0.888	120	583	989	1015	0.991	658	331	658	357	0
1	7	12	"iYDL170W"	"iYDL170W"	3930	17100	130	435	411	152	53	55	15	100	99	0	464	442	169	84	86	19	98	95	0	1.005	1.000	0.977	1.078	1.768	0.980	0.873	120	617	762	716	0.008	382	380	358	358	0
1	8	12	"iYDL166C"	"iYDL166C"	4120	17100	110	498	526	290	53	57	18	100	100	0	491	519	271	84	87	19	97	96	0	1.093	1.087	1.044	1.204	1.958	1.062	0.846	80	517	852	908	0.129	445	407	473	435	0
1	9	12	"iYDL160C"	"iYDL160C"	4330	17100	120	2379	2675	1690	52	55	17	100	100	0	838	955	537	86	89	19	100	100	0	3.094	3.018	2.984	3.005	1.457	3.162	0.923	120	592	3079	3492	1.630	2327	752	2623	869	0
1	10	12	"iYDR141C"	"iYDR141C"	4530	17100	120	1172	1091	564	52	56	18	100	99	0	582	521	256	87	88	20	94	94	0	2.263	2.394	2.346	2.545	1.652	2.387	0.834	120	546	1615	1473	1.178	1120	495	1039	434	0
1	11	12	"iYDR145W"	"iYDR145W"	4720	17100	120	282	283	113	54	148	725	0	0	0	436	425	209	88	110	174	74	49	0	0.655	0.680	0.620	0.737	1.965	0.609	0.780	120	561	576	566	-0.610	228	348	229	337	0
1	12	12	"iYDR150W"	"iYDR150W"	4930	17090	130	1242	1101	629	56	261	1400	35	0	0	3738	3359	1968	89	129	260	90	84	0	0.325	0.320	0.308	0.316	1.573	0.310	0.927	120	596	4835	4315	-1.621	1186	3649	1045	3270	0
1	13	12	"iYDR169C-0"	"iYDR169C-0"	5120	17100	130	1400	1372	742	54	60	43	100	100	0	726	682	333	86	89	26	95	93	0	2.103	2.211	2.163	2.300	1.614	2.327	0.893	120	591	1986	1914	1.073	1346	640	1318	596	0
1	14	12	"iYDR170W-A-0"	"iYDR170W-A-0"	5340	17090	140	7933	10137	8125	55	59	30	100	100	0	4224	5007	3970	86	89	24	100	100	0	1.904	2.049	1.979	2.119	1.583	2.090	0.936	156	664	12016	15003	0.929	7878	4138	10082	4921	0
1	15	12	"iYDR173C"	"iYDR173C"	5530	17100	120	1729	1687	984	54	57	20	100	100	0	768	733	403	86	90	26	97	94	0	2.456	2.524	2.553	2.680	1.455	2.546	0.945	120	528	2357	2280	1.296	1675	682	1633	647	0
1	16	12	"iYDR189W"	"iYDR189W"	5730	17100	120	656	657	350	53	56	19	100	100	0	2175	1917	1137	87	91	28	100	97	0	0.289	0.330	0.329	0.379	1.579	0.313	0.945	120	564	2691	2434	-1.792	603	2088	604	1830	0
1	17	12	"iYDR194C"	"iYDR194C"	5930	17100	120	1609	1506	813	52	55	16	100	100	0	965	863	427	86	89	27	97	95	0	1.771	1.871	1.851	1.979	1.677	1.932	0.915	120	559	2436	2231	0.825	1557	879	1454	777	0
1	18	12	"iYDR198C"	"iYDR198C"	6130	17100	120	999	1067	588	52	56	18	100	100	0	1101	1118	601	85	89	27	99	99	0	0.932	0.983	0.959	1.039	1.532	0.981	0.936	120	591	1963	2048	-0.101	947	1016	1015	1033	0
1	19	12	"iYDR214W"	"iYDR214W"	6330	17100	120	243	254	114	51	54	18	97	94	0	305	295	131	86	88	20	91	88	0	0.877	0.971	0.947	1.045	1.853	0.919	0.851	120	571	411	412	-0.190	192	219	203	209	0
1	20	12	"iYDR218C"	"iYDR218C"	6540	17100	130	1230	1179	669	50	53	15	100	100	0	796	794	444	87	92	56	92	90	0	1.664	1.597	1.536	1.683	1.538	1.598	0.924	120	629	1889	1836	0.735	1180	709	1129	707	0
1	21	12	"iYDR223W"	"iYDR223W"	6750	17090	130	1068	1077	656	50	53	17	100	99	0	686	680	409	87	93	56	90	80	0	1.699	1.732	1.727	1.888	1.590	1.698	0.911	120	711	1617	1620	0.765	1018	599	1027	593	0
1	1	13	"iYDR532C"	"iYDR532C"	2730	17300	150	235	309	209	53	56	18	97	89	0	300	374	247	86	90	37	87	80	0	0.850	0.889	0.856	0.929	1.859	0.830	0.876	156	762	396	544	-0.234	182	214	256	288	0
1	2	13	"iYDR535C"	"iYDR535C"	2930	17290	130	2045	1845	851	54	56	19	100	100	0	1226	1081	522	85	90	42	99	98	0	1.745	1.798	1.810	1.941	1.363	1.764	0.920	120	610	3132	2787	0.803	1991	1141	1791	996	0
1	3	13	"iYDR539W-1"	"iYDR539W-1"	3140	17290	100	203	227	135	53	57	21	91	83	0	235	274	166	85	88	23	81	80	0	1.000	0.921	0.861	1.023	2.157	0.929	0.778	80	460	300	363	0.000	150	150	174	189	0
1	4	13	"iYEL073C-4"	"iYEL073C-4"	3350	17290	120	574	606	373	53	61	38	95	90	0	359	371	231	90	98	60	78	70	0	1.937	1.968	2.030	2.301	1.825	1.835	0.894	120	589	790	834	0.954	521	269	553	281	0
1	5	13	"iYEL071W-1"	"iYEL071W-1"	3540	17290	130	1826	1642	1054	55	61	36	100	100	0	1455	1452	977	91	98	58	99	93	0	1.298	1.166	1.181	1.303	1.442	1.134	0.955	120	597	3135	2948	0.377	1771	1364	1587	1361	0
1	6	13	"iYEL068C"	"iYEL068C"	3740	17290	130	553	683	438	52	55	15	100	99	0	771	957	615	87	89	21	100	100	0	0.732	0.725	0.718	0.767	1.428	0.713	0.954	120	630	1185	1501	-0.449	501	684	631	870	0
1	7	13	"iYEL051W"	"iYEL051W"	3950	17290	120	959	899	483	52	55	18	100	97	0	1210	1036	544	85	88	21	98	95	0	0.806	0.891	0.909	0.937	1.508	0.887	0.955	120	579	2032	1798	-0.311	907	1125	847	951	0
1	8	13	"itG(GCC)E"	"itG(GCC)E"	4140	17280	110	260	258	143	52	56	20	90	87	0	277	297	176	87	93	47	73	66	0	1.095	0.981	0.998	1.134	2.174	0.892	0.854	80	516	398	416	0.131	208	190	206	210	0
1	9	13	"iYEL047C"	"iYEL047C"	4350	17300	120	1952	1722	899	51	54	16	100	100	0	1607	1365	727	88	90	27	97	93	0	1.251	1.309	1.343	1.410	1.355	1.283	0.971	120	543	3420	2948	0.324	1901	1519	1671	1277	0
1	10	13	"iYEL029C"	"iYEL029C"	4550	17300	140	1518	1832	1393	52	54	16	100	100	0	1622	2167	1694	86	88	19	100	100	0	0.954	0.855	0.852	0.886	1.385	0.838	0.969	156	620	3002	3861	-0.067	1466	1536	1780	2081	0
1	11	13	"iYEL027W"	"iYEL027W"	4750	17300	120	1470	1324	783	53	56	27	100	100	0	2917	2627	1658	86	88	19	100	100	0	0.501	0.500	0.515	0.534	1.348	0.485	0.968	120	499	4248	3812	-0.998	1417	2831	1271	2541	0
1	12	13	"iYEL023C"	"iYEL023C"	4940	17280	130	1610	1758	1191	55	57	19	100	100	0	657	658	438	86	95	126	73	63	0	2.723	2.977	3.061	3.439	1.660	2.943	0.951	120	591	2126	2275	1.445	1555	571	1703	572	0
1	13	13	"iYFL031W"	"iYFL031W"	5140	17290	130	2387	2261	1333	53	57	20	100	100	0	2039	1804	1040	85	93	122	99	89	0	1.194	1.284	1.295	1.326	1.318	1.279	0.942	120	631	4288	3927	0.256	2334	1954	2208	1719	0
1	14	13	"iYFL027C"	"iYFL027C"	5350	17290	130	1732	1750	971	53	56	18	100	100	0	2704	2431	1322	84	88	25	100	100	0	0.641	0.723	0.729	0.744	1.222	0.722	0.976	120	608	4299	4044	-0.642	1679	2620	1697	2347	0
1	15	13	"iYFL023W"	"iYFL023W"	5550	17300	130	428	426	181	53	56	20	100	99	0	704	657	332	86	90	24	98	94	0	0.607	0.653	0.676	0.751	1.659	0.607	0.893	120	616	993	944	-0.721	375	618	373	571	0
1	16	13	"iYFL009W"	"iYFL009W"	5760	17300	120	352	474	335	53	57	20	100	100	0	456	498	298	88	91	20	96	96	0	0.813	1.027	1.009	1.118	1.838	1.067	0.920	120	546	667	831	-0.300	299	368	421	410	0
1	17	13	"iYFL005W"	"iYFL005W"	5950	17290	130	2219	2091	1302	53	57	20	100	100	0	3844	3396	2083	88	92	25	100	100	0	0.577	0.616	0.613	0.636	1.312	0.610	0.962	120	581	5922	5346	-0.794	2166	3756	2038	3308	0
1	18	13	"iYFLWdelta5"	"iYFLWdelta5"	6150	17300	130	569	518	212	53	57	21	100	99	0	1282	1164	623	87	93	57	97	90	0	0.432	0.432	0.427	0.511	1.626	0.388	0.899	120	584	1711	1542	-1.212	516	1195	465	1077	0
1	19	13	"iYFR009W"	"iYFR009W"	6340	17300	130	897	924	506	52	56	20	100	100	0	1090	1075	619	89	93	35	99	97	0	0.844	0.884	0.896	0.962	1.390	0.858	0.967	120	595	1846	1858	-0.244	845	1001	872	986	0
1	20	13	"iYFR012W"	"iYFR012W"	6550	17290	130	2517	2681	2211	53	57	24	100	100	0	2713	3174	5532	93	112	252	90	85	0	0.940	0.853	1.014	1.097	1.530	0.476	0.737	120	614	5084	5709	-0.089	2464	2620	2628	3081	0
1	21	13	"iYFR016C"	"iYFR016C"	6740	17300	130	657	710	412	52	56	20	99	97	0	370	361	178	90	96	55	83	77	0	2.161	2.428	2.470	2.696	1.715	2.418	0.807	120	696	885	929	1.112	605	280	658	271	0
1	1	14	"iYFR027W"	"iYFR027W"	2730	17490	160	411	634	472	52	56	17	98	96	0	423	645	460	86	89	36	91	89	0	1.065	1.041	1.036	1.140	1.898	1.055	0.908	208	865	696	1141	0.091	359	337	582	559	0
1	2	14	"iYFR030W"	"iYFR030W"	2950	17490	140	191	186	75	52	58	34	91	78	0	552	545	259	85	90	40	94	91	0	0.298	0.291	0.267	0.309	2.149	0.254	0.705	156	638	606	594	-1.748	139	467	134	460	0
1	3	14	"iYFR032C-A"	"iYFR032C-A"	3160	17480	140	886	1019	711	54	59	33	98	96	0	597	696	484	85	88	22	93	89	0	1.625	1.579	1.617	1.784	1.793	1.554	0.909	156	655	1344	1576	0.700	832	512	965	611	0
1	4	14	"iYGL002W"	"iYGL002W"	3350	17500	130	516	556	340	54	56	14	98	94	0	1214	1283	892	86	89	20	98	94	0	0.410	0.419	0.442	0.498	1.760	0.399	0.923	120	554	1590	1699	-1.288	462	1128	502	1197	0
1	5	14	"iYGR002C"	"iYGR002C"	3550	17500	130	774	733	379	53	57	19	98	98	0	925	890	483	90	91	20	95	95	0	0.863	0.850	0.835	0.928	1.764	0.827	0.933	120	609	1556	1480	-0.212	721	835	680	800	0
1	6	14	"iYGR006W"	"iYGR006W"	3750	17490	130	1763	1775	984	52	55	18	100	100	0	2843	2585	1458	87	89	21	100	100	0	0.621	0.690	0.705	0.733	1.351	0.678	0.958	120	615	4467	4221	-0.688	1711	2756	1723	2498	0
1	7	14	"iYGR026W"	"iYGR026W"	3940	17500	130	783	724	380	51	54	16	99	99	0	1289	1191	643	85	86	20	100	98	0	0.608	0.608	0.605	0.670	1.540	0.596	0.949	120	600	1936	1779	-0.718	732	1204	673	1106	0
1	8	14	"iYGR028W"	"iYGR028W"	4140	17490	120	1813	1722	1022	51	55	20	100	100	0	2204	2106	1298	85	91	44	100	100	0	0.832	0.827	0.816	0.878	1.445	0.806	0.953	120	591	3881	3692	-0.266	1762	2119	1671	2021	0
1	9	14	"iYGR030C"	"iYGR030C"	4350	17490	140	2071	2091	1286	52	56	20	100	100	0	1152	1187	675	85	90	42	99	98	0	1.892	1.850	1.879	1.836	1.388	1.897	0.955	156	670	3086	3141	0.920	2019	1067	2039	1102	0
1	10	14	"iYGR043C-0"	"iYGR043C-0"	4550	17490	130	690	687	391	53	56	18	99	97	0	396	401	215	83	88	27	90	85	0	2.035	1.994	2.084	2.156	1.489	2.044	0.896	120	541	950	952	1.025	637	313	634	318	0
1	11	14	"iYGR047C"	"iYGR047C"	4760	17490	140	1376	1473	948	53	56	19	100	100	0	932	942	603	85	89	27	96	94	0	1.562	1.657	1.664	1.812	1.569	1.650	0.936	156	633	2170	2277	0.643	1323	847	1420	857	0
1	12	14	"iYGR051C"	"iYGR051C"	4950	17490	130	1874	1753	941	52	55	15	100	100	0	786	729	371	87	94	126	87	79	0	2.607	2.650	2.675	2.812	1.514	2.653	0.929	120	593	2521	2343	1.382	1822	699	1701	642	0
1	13	14	"iYGR067C"	"iYGR067C"	5150	17500	130	692	649	332	52	55	17	99	98	0	430	397	192	86	93	121	77	62	0	1.860	1.920	1.957	2.111	1.602	1.917	0.891	120	630	984	908	0.896	640	344	597	311	0
1	14	14	"iYGR072W"	"iYGR072W"	5350	17490	130	184	189	79	51	54	16	95	90	0	230	228	102	84	86	22	84	80	0	0.911	0.958	0.939	1.055	2.048	0.843	0.768	120	630	279	282	-0.135	133	146	138	144	0
1	15	14	"iYGR078C"	"iYGR078C"	5560	17490	120	545	594	342	52	55	19	99	98	0	357	394	233	87	89	19	91	86	0	1.826	1.765	1.772	2.043	1.781	1.158	0.385	120	556	763	849	0.869	493	270	542	307	0
1	16	14	"iYHR009C"	"iYHR009C"	5760	17490	130	1393	1334	807	54	57	19	100	97	0	872	804	480	91	93	21	94	90	0	1.714	1.795	1.765	1.942	1.581	1.751	0.938	120	582	2120	1993	0.778	1339	781	1280	713	0
1	17	14	"iYHR013C"	"iYHR013C"	5950	17490	130	1793	1662	835	55	60	20	100	100	0	1118	1037	522	93	98	54	98	93	0	1.696	1.702	1.695	1.777	1.326	1.686	0.956	120	628	2763	2551	0.762	1738	1025	1607	944	0
1	18	14	"iYHRWdelta7"	"iYHRWdelta7"	6160	17490	130	626	590	281	53	58	20	99	98	0	697	705	376	90	94	55	94	90	0	0.944	0.873	0.874	0.962	1.588	0.804	0.883	120	612	1180	1152	-0.083	573	607	537	615	0
1	19	14	"iYHR027C"	"iYHR027C"	6350	17490	130	484	546	318	52	54	16	100	99	0	248	283	153	88	91	32	80	74	0	2.700	2.533	2.720	3.137	1.975	2.449	0.820	120	582	592	689	1.433	432	160	494	195	0
1	20	14	"iYHR031C"	"iYHR031C"	6540	17500	120	1079	1078	536	51	56	23	100	100	0	612	588	263	90	107	256	76	50	0	1.969	2.062	2.023	2.114	1.413	1.668	0.400	120	572	1550	1525	0.978	1028	522	1027	498	0
1	21	14	"iYHR035W"	"iYHR035W"	6750	17500	130	841	840	439	52	55	17	100	100	0	656	623	318	89	92	22	97	93	0	1.392	1.476	1.513	1.595	1.485	1.460	0.934	120	712	1356	1322	0.477	789	567	788	534	0
1	1	15	"iYHR048W"	"iYHR048W"	2740	17690	140	380	356	157	52	56	17	100	98	0	334	318	137	85	92	112	75	55	0	1.317	1.305	1.251	1.461	1.830	0.849	0.463	156	720	577	537	0.398	328	249	304	233	0
1	2	15	"iYHR052W"	"iYHR052W"	2950	17690	140	575	599	343	52	57	33	98	95	0	1566	1664	1086	85	94	121	95	87	0	0.353	0.346	0.351	0.384	1.681	0.323	0.922	156	625	2004	2126	-1.502	523	1481	547	1579	0
1	3	15	"iYHR056C"	"iYHR056C"	3160	17690	140	1425	1453	957	53	58	32	99	96	0	888	872	510	83	87	21	95	94	0	1.704	1.774	1.724	1.861	1.802	1.849	0.929	156	611	2177	2189	0.769	1372	805	1400	789	0
1	4	15	"itF(GAA)H1"	"itF(GAA)H1"	3360	17690	140	3254	2965	1652	54	57	17	100	100	0	2416	2042	1215	86	89	22	99	99	0	1.373	1.488	1.527	1.679	1.587	1.458	0.945	156	613	5530	4867	0.458	3200	2330	2911	1956	0
1	5	15	"iYHR075C"	"iYHR075C"	3550	17690	130	4648	4149	2204	54	58	20	100	100	0	4474	3983	2193	90	93	21	100	100	0	1.048	1.052	1.037	1.060	1.399	1.028	0.939	120	562	8978	7988	0.068	4594	4384	4095	3893	0
1	6	15	"iYHR079C"	"iYHR079C"	3750	17700	120	2872	2619	1106	53	56	20	100	100	0	1462	1314	570	86	88	21	100	98	0	2.049	2.090	2.046	2.190	1.505	2.103	0.932	120	572	4195	3794	1.035	2819	1376	2566	1228	0
1	7	15	"iYIL013C"	"iYIL013C"	3960	17690	130	2092	1902	964	53	56	22	100	100	0	1122	1040	564	85	88	22	99	97	0	1.966	1.936	1.973	2.057	1.529	1.898	0.927	120	631	3076	2804	0.975	2039	1037	1849	955	0
1	8	15	"iYIL009C-A"	"iYIL009C-A"	4160	17690	120	578	543	236	52	57	25	100	98	0	822	779	404	87	91	23	97	96	0	0.716	0.710	0.710	0.829	1.927	0.650	0.879	120	528	1261	1183	-0.483	526	735	491	692	0
1	9	15	"iYIL009W"	"iYIL009W"	4350	17700	130	2240	2106	1203	53	57	21	100	100	0	5348	4828	2892	88	91	24	100	100	0	0.416	0.433	0.442	0.451	1.540	0.424	0.931	120	550	7447	6793	-1.266	2187	5260	2053	4740	0
1	10	15	"itE(UUC)I"	"itE(UUC)I"	4560	17680	130	340	326	164	54	58	22	96	90	0	284	271	132	85	91	31	84	75	0	1.437	1.462	1.562	1.647	2.122	1.378	0.839	120	602	485	458	0.523	286	199	272	186	0
1	11	15	"iYIR010W"	"iYIR010W"	4760	17690	130	306	300	120	53	57	21	99	95	0	823	785	447	87	91	28	97	95	0	0.344	0.354	0.360	0.421	1.830	0.300	0.844	120	540	989	945	-1.541	253	736	247	698	0
1	12	15	"iYIR014W"	"iYIR014W"	4950	17690	130	513	529	276	52	55	18	99	97	0	560	558	295	87	90	21	95	91	0	0.975	1.013	1.016	1.101	1.799	0.985	0.904	120	560	934	948	-0.037	461	473	477	471	0
1	13	15	"iYIR026C"	"iYIR026C"	5150	17700	120	879	864	380	53	56	18	100	100	0	1157	1154	561	88	90	23	100	96	0	0.773	0.761	0.765	0.841	1.586	0.733	0.931	120	523	1895	1877	-0.372	826	1069	811	1066	0
1	14	15	"iYIR030C"	"iYIR030C"	5360	17690	130	874	846	458	51	54	16	100	100	0	1191	1208	755	85	88	22	97	95	0	0.744	0.708	0.718	0.834	1.766	0.655	0.923	120	590	1929	1918	-0.426	823	1106	795	1123	0
1	15	15	"iYIR034C"	"iYIR034C"	5560	17690	130	1297	1268	727	52	55	16	100	100	0	1865	1886	1197	88	91	22	100	100	0	0.701	0.676	0.683	0.755	1.552	0.633	0.923	120	541	3022	3014	-0.513	1245	1777	1216	1798	0
1	16	15	"iYJL223C-0"	"iYJL223C-0"	5740	17690	130	13698	12716	6921	54	57	17	100	100	0	7266	7161	4335	91	94	23	100	100	0	1.902	1.791	1.783	1.871	1.460	1.729	0.943	120	549	20819	19732	0.927	13644	7175	12662	7070	0
1	17	15	"iYJL219W"	"iYJL219W"	5940	17700	130	2798	2719	1245	55	58	16	100	100	0	2609	2458	1218	91	95	21	100	100	0	1.089	1.125	1.125	1.202	1.423	1.107	0.942	120	552	5261	5031	0.123	2743	2518	2664	2367	0
1	18	15	"iYJL215C"	"iYJL215C"	6130	17700	130	919	803	403	53	58	18	100	100	0	974	869	451	93	95	21	96	95	0	0.983	0.966	0.961	1.120	1.707	0.937	0.935	120	572	1747	1526	-0.025	866	881	750	776	0
1	19	15	"iYJR093C"	"iYJR093C"	6340	17700	120	1494	1492	805	53	56	17	100	100	0	1306	1308	757	90	93	32	100	99	0	1.185	1.181	1.210	1.274	1.535	1.148	0.910	120	525	2657	2657	0.245	1441	1216	1439	1218	0
1	20	15	"iYJR095W"	"iYJR095W"	6530	17700	130	1977	1880	1118	52	54	15	100	100	0	1421	1252	745	89	92	32	100	99	0	1.445	1.572	1.579	1.695	1.525	1.552	0.933	120	555	3257	2991	0.531	1925	1332	1828	1163	0
1	21	15	"iYJR099W"	"iYJR099W"	6740	17700	120	494	563	314	52	56	19	99	95	0	530	604	344	87	91	32	96	93	0	0.998	0.988	0.988	1.057	1.678	0.954	0.905	120	620	885	1028	-0.003	442	443	511	517	0
1	1	16	"iYJR115W"	"iYJR115W"	2750	17900	140	1272	1216	635	53	56	17	100	100	0	792	802	417	86	94	119	91	83	0	1.727	1.624	1.634	1.723	1.527	1.577	0.828	156	634	1925	1879	0.788	1219	706	1163	716	0
1	2	16	"iYJR119C"	"iYJR119C"	2950	17890	130	1028	934	545	53	56	17	100	100	0	676	665	380	84	95	138	83	69	0	1.647	1.516	1.467	1.617	1.558	1.503	0.900	120	476	1567	1462	0.720	975	592	881	581	0
1	3	16	"iYJR123W"	"iYJR123W"	3140	17890	140	362	395	263	52	56	16	99	99	0	1092	1243	846	83	92	101	96	86	0	0.307	0.296	0.276	0.317	1.884	0.261	0.720	156	551	1319	1503	-1.703	310	1009	343	1160	0
1	4	16	"iYJR140C"	"iYJR140C"	3350	17900	130	690	667	300	53	56	17	100	100	0	527	489	205	85	94	105	89	79	0	1.441	1.520	1.517	1.602	1.554	1.397	0.659	120	503	1079	1018	0.527	637	442	614	404	0
1	5	16	"iYJR144W"	"iYJR144W"	3540	17890	130	1290	1132	595	53	57	19	100	99	0	1129	1019	579	87	89	22	100	98	0	1.187	1.158	1.123	1.235	1.582	1.106	0.924	120	533	2279	2011	0.247	1237	1042	1079	932	0
1	6	16	"iYJR149W"	"iYJR149W"	3740	17890	130	1393	1285	607	54	58	21	100	100	0	1501	1294	646	84	87	22	100	100	0	0.945	1.017	1.019	1.086	1.458	0.990	0.943	120	537	2756	2441	-0.082	1339	1417	1231	1210	0
1	7	16	"iYJR159W"	"iYJR159W"	3940	17900	130	3111	2861	1503	55	58	20	100	100	0	2322	1995	1029	87	90	22	100	100	0	1.367	1.471	1.465	1.515	1.527	1.500	0.944	120	556	5291	4714	0.451	3056	2235	2806	1908	0
1	8	16	"iYKL225W"	"iYKL225W"	4160	17890	140	23883	20966	12389	55	59	22	100	100	0	18120	16526	10647	90	94	38	100	100	0	1.322	1.272	1.265	1.367	1.545	1.237	0.954	156	538	41858	37347	0.402	23828	18030	20911	16436	0
1	9	16	"iYKL221W-0"	"iYKL221W-0"	4340	17900	140	2465	2268	1321	54	57	19	100	100	0	4067	3220	1996	89	92	39	100	99	0	0.606	0.707	0.722	0.771	1.837	0.681	0.918	156	401	6389	5345	-0.722	2411	3978	2214	3131	0
1	10	16	"iYKR062W"	"iYKR062W"	4480	17890	150	393	375	184	53	56	18	96	92	0	383	376	207	88	90	23	93	89	0	1.153	1.118	1.136	1.159	1.675	1.115	0.885	156	530	635	610	0.205	340	295	322	288	0
1	11	16	"iYKR066C"	"iYKR066C"	4680	17890	150	1535	1473	863	53	56	17	100	99	0	636	623	345	87	89	20	96	92	0	2.699	2.649	2.614	2.845	1.690	2.669	0.924	156	641	2031	1956	1.433	1482	549	1420	536	0
1	12	16	"iYKR070W"	"iYKR070W"	4880	17890	150	881	815	464	53	57	20	98	96	0	1649	1509	939	88	90	22	98	96	0	0.530	0.536	0.541	0.592	1.726	0.509	0.930	156	569	2389	2183	-0.915	828	1561	762	1421	0
1	13	16	"iYKR084C"	"iYKR084C"	5080	17890	150	621	844	690	54	58	21	95	92	0	511	607	434	89	92	22	89	83	0	1.344	1.525	1.575	1.508	2.013	1.592	0.922	156	606	989	1308	0.426	567	422	790	518	0
1	14	16	"iYKR088C"	"iYKR088C"	5280	17890	150	585	594	370	53	56	19	98	95	0	592	659	413	88	91	20	94	91	0	1.056	0.947	0.933	0.966	1.773	0.928	0.919	156	626	1036	1112	0.078	532	504	541	571	0
1	15	16	"iYKR092C-0"	"iYKR092C-0"	5480	17890	150	1978	1996	1349	52	55	17	100	100	0	818	836	515	87	90	20	96	93	0	2.635	2.595	2.647	2.667	1.611	2.669	0.940	156	642	2657	2693	1.398	1926	731	1944	749	0
1	16	16	"iYKR103W"	"iYKR103W"	5680	17890	150	502	622	447	55	59	20	92	89	0	544	687	524	92	98	31	87	83	0	0.989	0.953	0.948	1.060	1.910	0.896	0.898	156	582	899	1162	-0.016	447	452	567	595	0
1	17	16	"iYKR106W-1"	"iYKR106W-1"	5880	17890	150	4227	3847	2765	54	58	17	95	94	0	2756	2889	2200	92	97	30	95	93	0	1.566	1.356	1.318	1.392	1.685	1.317	0.939	156	600	6837	6590	0.647	4173	2664	3793	2797	0
1	18	16	"iYLL066C-1"	"iYLL066C-1"	6080	17890	150	24009	25269	18165	54	57	17	100	100	0	10456	11259	8603	92	96	25	100	99	0	2.311	2.258	2.185	2.308	1.695	2.217	0.958	156	585	34319	36382	1.209	23955	10364	25215	11167	0
1	19	16	"iYLL050C"	"iYLL050C"	6280	17890	150	1932	1900	1272	55	59	20	100	98	0	1494	1555	1035	92	98	47	96	93	0	1.339	1.261	1.276	1.344	1.738	1.263	0.935	156	623	3279	3308	0.421	1877	1402	1845	1463	0
1	20	16	"iYLL044W"	"iYLL044W"	6480	17890	150	2885	2652	1637	55	59	20	100	100	0	737	676	385	90	96	43	92	85	0	4.374	4.432	4.347	4.698	1.623	4.518	0.929	156	604	3477	3183	2.129	2830	647	2597	586	0
1	21	16	"iYLL040C"	"iYLL040C"	6680	17890	150	1669	1634	1028	53	57	21	100	100	0	756	830	488	88	91	28	96	94	0	2.419	2.131	2.160	2.216	1.698	2.168	0.934	156	784	2284	2323	1.275	1616	668	1581	742	0
1	1	17	"iYLR267W"	"iYLR267W"	2680	18070	150	1111	1131	701	54	74	68	96	90	0	880	894	549	90	108	68	91	84	0	1.338	1.340	1.439	1.477	1.617	1.322	0.924	156	679	1847	1881	0.420	1057	790	1077	804	0
1	2	17	"itV(AAC)L"	"itV(AAC)L"	2880	18080	150	364	415	235	53	55	17	97	97	0	363	400	229	85	88	22	92	88	0	1.119	1.149	1.159	1.200	1.944	1.104	0.913	156	554	589	677	0.162	311	278	362	315	0
1	3	17	"iYLR275W"	"iYLR275W"	3080	18080	150	184	195	105	52	54	14	92	86	0	321	360	224	83	86	20	87	82	0	0.555	0.516	0.515	0.557	2.348	0.452	0.763	156	572	370	420	-0.850	132	238	143	277	0
1	4	17	"iYLR293C"	"iYLR293C"	3280	18080	150	583	575	277	52	55	19	98	96	0	365	347	160	84	93	102	78	64	0	1.890	1.989	1.952	2.151	1.696	1.945	0.894	156	535	812	786	0.918	531	281	523	263	0
1	5	17	"iYLR298C"	"iYLR298C"	3480	18080	150	1368	1499	934	53	60	68	96	92	0	460	486	271	85	89	26	92	89	0	3.507	3.606	3.484	3.730	1.787	3.752	0.873	156	561	1690	1847	1.810	1315	375	1446	401	0
1	6	17	"iYLRCdelta18"	"iYLRCdelta18"	3680	18080	150	188	190	105	53	60	65	70	51	0	227	228	116	84	87	22	83	76	0	0.944	0.951	0.883	0.950	2.146	1.214	0.548	156	609	278	281	-0.083	135	143	137	144	0
1	7	17	"iYLR318W"	"iYLR318W"	3880	18080	150	403	376	178	53	56	17	98	94	0	640	568	290	86	88	22	92	89	0	0.632	0.670	0.640	0.717	1.807	0.629	0.843	156	606	904	805	-0.663	350	554	323	482	0
1	8	17	"iYLR323C"	"iYLR323C"	4080	18080	150	698	661	322	55	58	16	100	98	0	486	462	232	88	93	50	87	81	0	1.616	1.620	1.609	1.822	1.672	1.565	0.925	156	588	1041	980	0.692	643	398	606	374	0
1	9	17	"iYLR327C"	"iYLR327C"	4280	18080	150	1770	1582	832	55	59	19	99	97	0	740	693	352	86	92	53	91	87	0	2.622	2.516	2.523	2.636	1.679	2.572	0.887	156	495	2369	2134	1.391	1715	654	1527	607	0
1	10	17	"iYLR338W"	"iYLR338W"	4480	18080	150	717	707	382	54	60	26	97	95	0	310	297	136	89	92	24	88	85	0	3.000	3.139	3.043	3.132	1.710	3.141	0.877	156	655	884	861	1.585	663	221	653	208	0
1	11	17	"iYLR343W"	"iYLR343W"	4760	18090	140	695	695	402	52	55	17	99	98	0	1048	1115	703	88	90	20	98	98	0	0.670	0.626	0.631	0.686	1.725	0.593	0.928	156	647	1603	1670	-0.578	643	960	643	1027	0
1	12	17	"iYLR345W"	"iYLR345W"	4950	18100	140	547	557	322	52	56	18	100	98	0	1236	1277	857	89	91	20	99	97	0	0.432	0.425	0.428	0.493	1.881	0.392	0.921	156	563	1642	1693	-1.212	495	1147	505	1188	0
1	13	17	"iYMR044W"	"iYMR044W"	5150	18100	130	1030	1076	610	53	56	18	100	100	0	1914	1882	1118	90	93	22	100	98	0	0.536	0.571	0.558	0.652	1.629	0.550	0.930	120	531	2801	2815	-0.901	977	1824	1023	1792	0
1	14	17	"iYMR048W"	"iYMR048W"	5340	18100	120	833	797	364	51	55	18	100	99	0	1141	1064	526	88	95	103	94	90	0	0.743	0.764	0.761	0.830	1.584	0.735	0.930	120	540	1835	1722	-0.429	782	1053	746	976	0
1	15	17	"iYMRCdelta10"	"iYMRCdelta10"	5550	18100	130	988	970	506	52	56	19	100	99	0	784	756	383	89	97	103	87	86	0	1.347	1.376	1.412	1.483	1.700	1.328	0.845	120	547	1631	1585	0.429	936	695	918	667	0
1	16	17	"iYMR067C"	"iYMR067C"	5740	18090	140	1290	1293	823	52	57	20	98	96	0	859	890	580	92	95	29	93	89	0	1.614	1.555	1.543	1.837	1.857	1.523	0.917	156	572	2005	2039	0.691	1238	767	1241	798	0
1	17	17	"iYMR071C"	"iYMR071C"	5940	18100	130	1148	1237	771	53	56	17	99	99	0	1086	1049	629	93	95	24	95	92	0	1.103	1.238	1.243	1.359	1.581	1.233	0.948	120	532	2088	2140	0.141	1095	993	1184	956	0
1	18	17	"iYMR075C-A"	"iYMR075C-A"	6130	18100	140	498	501	202	53	57	16	99	98	0	1455	1366	657	94	97	29	100	100	0	0.327	0.352	0.343	0.373	1.566	0.322	0.885	156	637	1806	1720	-1.613	445	1361	448	1272	0
1	19	17	"iYMR090W"	"iYMR090W"	6350	18100	120	900	947	544	54	57	18	100	97	0	993	1006	604	90	95	31	97	89	0	0.937	0.975	0.982	1.098	1.637	0.949	0.937	120	543	1749	1809	-0.094	846	903	893	916	0
1	20	17	"iYMR095C"	"iYMR095C"	6540	18100	120	1456	1655	981	53	57	19	100	100	0	1209	1334	808	91	93	23	100	99	0	1.255	1.289	1.309	1.412	1.606	1.274	0.939	120	560	2521	2845	0.328	1403	1118	1602	1243	0
1	21	17	"iYMRCdelta13"	"iYMRCdelta13"	6750	18100	130	351	343	151	52	56	19	99	98	0	393	387	196	87	90	33	95	86	0	0.977	0.970	0.970	1.108	1.804	0.886	0.881	120	728	605	591	-0.033	299	306	291	300	0
1	1	18	"iYMR111C"	"iYMR111C"	2750	18290	150	708	672	340	55	73	62	92	89	0	477	439	217	90	105	60	85	77	0	1.687	1.768	1.779	1.963	1.588	2.135	0.718	156	767	1040	966	0.755	653	387	617	349	0
1	2	18	"iYMR115W"	"iYMR115W"	2940	18290	120	186	190	72	52	56	18	98	95	0	224	230	82	86	89	30	91	85	0	0.971	0.958	0.932	0.978	1.618	0.873	0.688	120	527	272	282	-0.042	134	138	138	144	0
1	3	18	"iYMRWdelta16"	"iYMRWdelta16"	3150	18280	130	478	444	240	51	55	16	93	90	0	761	683	406	85	87	20	90	85	0	0.632	0.657	0.656	0.744	1.657	0.616	0.921	120	573	1103	991	-0.663	427	676	393	598	0
1	4	18	"iYNL258C"	"iYNL258C"	3350	18280	140	449	402	197	52	56	19	94	90	0	347	321	154	85	89	25	85	83	0	1.515	1.483	1.431	1.539	1.763	1.421	0.904	156	590	659	586	0.600	397	262	350	236	0
1	5	18	"iYNL254C"	"iYNL254C"	3550	18290	130	1834	1772	924	56	64	71	97	94	0	901	819	391	87	92	27	95	91	0	2.184	2.344	2.313	2.527	1.506	2.378	0.953	120	513	2592	2448	1.127	1778	814	1716	732	0
1	6	18	"iYNL249C"	"iYNL249C"	3740	18290	120	532	514	236	53	63	72	97	92	0	636	588	284	86	91	28	97	93	0	0.871	0.918	0.900	1.020	1.520	0.884	0.943	120	521	1029	963	-0.199	479	550	461	502	0
1	7	18	"iYNL231C"	"iYNL231C"	3950	18290	130	578	526	261	52	56	24	96	93	0	610	559	282	84	88	24	89	85	0	1.000	0.998	1.009	1.115	1.638	0.977	0.949	120	597	1052	949	0.000	526	526	474	475	0
1	8	18	"iYNL225C"	"iYNL225C"	4150	18290	130	402	374	163	54	57	20	95	93	0	365	336	149	84	90	42	88	80	0	1.238	1.270	1.282	1.378	1.549	1.223	0.912	120	579	629	572	0.309	348	281	320	252	0
1	9	18	"iYNL221C"	"iYNL221C"	4350	18290	140	2036	2029	1143	56	62	26	100	98	0	1037	983	565	88	95	44	93	91	0	2.086	2.204	2.217	2.401	1.458	2.174	0.951	156	616	2929	2868	1.061	1980	949	1973	895	0
1	10	18	"iYNL202W"	"iYNL202W"	4540	18300	130	378	571	1162	55	63	30	97	96	0	518	723	1443	90	96	28	95	94	0	0.755	0.815	0.771	0.824	1.543	0.759	0.609	120	581	751	1149	-0.406	323	428	516	633	0
1	11	18	"iYNL197C"	"iYNL197C"	4750	18280	130	779	773	471	54	69	127	89	75	0	525	518	310	92	102	107	75	65	0	1.674	1.688	1.738	2.028	1.845	1.586	0.904	120	606	1158	1145	0.744	725	433	719	426	0
1	12	18	"iYNL193W"	"iYNL193W"	4950	18290	130	1129	1087	583	54	67	129	90	83	0	735	663	347	89	99	110	83	78	0	1.664	1.800	1.844	1.965	1.559	1.753	0.915	120	576	1721	1607	0.735	1075	646	1033	574	0
1	13	18	"iYNL176C"	"iYNL176C"	5160	18290	140	900	1023	676	51	57	34	100	99	0	349	397	227	88	93	30	90	84	0	3.253	3.146	3.141	3.475	1.692	3.187	0.920	156	624	1110	1281	1.702	849	261	972	309	0
1	14	18	"iYNL168C"	"iYNL168C"	5350	18290	130	1070	996	477	51	57	34	98	96	0	1310	1188	620	88	96	102	90	90	0	0.834	0.859	0.859	0.953	1.549	0.822	0.937	120	575	2241	2045	-0.262	1019	1222	945	1100	0
1	15	18	"iYNL164C"	"iYNL164C"	5570	18290	140	596	678	430	51	56	21	98	97	0	521	601	384	90	97	97	85	71	0	1.265	1.227	1.242	1.326	1.671	1.191	0.934	156	615	976	1138	0.339	545	431	627	511	0
1	16	18	"iYOL113W"	"iYOL113W"	5760	18290	130	667	616	351	52	56	20	97	96	0	777	751	455	92	94	21	95	95	0	0.898	0.856	0.894	0.952	1.502	0.814	0.929	120	557	1300	1223	-0.156	615	685	564	659	0
1	17	18	"iYOL109W"	"iYOL109W"	5960	18290	130	269	275	130	53	56	17	98	93	0	260	262	123	93	95	22	85	79	0	1.293	1.314	1.280	1.454	1.675	1.189	0.810	120	566	383	391	0.371	216	167	222	169	0
1	18	18	"iYOLCdelta3"	"iYOLCdelta3"	6150	18300	130	257	279	129	52	56	18	100	98	0	357	354	180	90	96	37	89	83	0	0.768	0.860	0.858	1.005	2.033	0.772	0.815	120	580	472	491	-0.381	205	267	227	264	0
1	19	18	"iYOL092W"	"iYOL092W"	6360	18290	120	232	216	86	52	56	19	95	90	0	216	215	92	90	94	36	82	70	0	1.429	1.312	1.354	1.377	1.675	1.154	0.794	120	559	306	289	0.515	180	126	164	125	0
1	20	18	"iYOL088C"	"iYOL088C"	6560	18300	130	1214	1164	591	52	56	24	100	100	0	804	710	355	90	93	23	97	97	0	1.627	1.794	1.806	2.008	1.643	1.762	0.952	120	600	1876	1732	0.703	1162	714	1112	620	0
1	21	18	"iYOL084W"	"iYOL084W"	6760	18300	130	1203	1110	536	51	55	21	100	99	0	793	786	381	88	92	33	97	95	0	1.634	1.517	1.523	1.620	1.430	1.501	0.945	120	679	1857	1757	0.708	1152	705	1059	698	0
1	1	19	"iYOL067C"	"iYOL067C"	2750	18480	140	301	319	172	53	62	40	93	83	0	277	299	161	89	94	33	84	76	0	1.319	1.267	1.309	1.409	1.764	1.178	0.906	156	702	436	476	0.400	248	188	266	210	0
1	2	19	"iYOL063C"	"iYOL063C"	2960	18490	140	359	372	207	52	56	19	96	93	0	393	434	251	86	90	30	89	85	0	1.000	0.920	0.943	1.030	1.596	0.873	0.929	156	661	614	668	0.000	307	307	320	348	0
1	3	19	"iYOL059W"	"iYOL059W"	3170	18490	140	1576	1650	1098	52	57	20	100	100	0	964	982	605	86	88	22	96	92	0	1.736	1.783	1.804	1.941	1.537	1.808	0.969	156	635	2402	2494	0.796	1524	878	1598	896	0
1	4	19	"iYOL045W"	"iYOL045W"	3360	18480	130	726	727	401	53	57	19	100	98	0	1142	1083	655	86	90	22	98	95	0	0.637	0.676	0.676	0.773	1.520	0.645	0.966	120	556	1729	1671	-0.650	673	1056	674	997	0
1	5	19	"iYOL041C"	"iYOL041C"	3560	18470	150	1147	1095	600	55	62	30	100	99	0	936	879	482	88	94	31	95	92	0	1.288	1.315	1.316	1.419	1.387	1.275	0.967	156	686	1940	1831	0.365	1092	848	1040	791	0
1	6	19	"iYOL035C"	"iYOL035C"	3760	18470	130	435	457	237	54	60	29	98	90	0	392	414	236	87	93	31	91	87	0	1.249	1.232	1.287	1.408	1.512	1.157	0.924	120	591	686	730	0.321	381	305	403	327	0
1	7	19	"iYOR260W"	"iYOR260W"	3970	18490	140	496	517	309	52	58	25	99	92	0	643	667	429	87	91	24	94	91	0	0.799	0.802	0.809	0.904	1.670	0.763	0.959	156	648	1000	1045	-0.325	444	556	465	580	0
1	8	19	"iYOR265W"	"iYOR265W"	4150	18490	130	694	623	303	52	57	22	97	96	0	863	776	407	87	91	25	95	93	0	0.827	0.829	0.832	0.899	1.437	0.784	0.941	120	557	1418	1260	-0.273	642	776	571	689	0
1	9	19	"iYOR269W"	"iYOR269W"	4360	18490	130	496	465	206	52	56	20	100	94	0	940	871	442	87	91	25	95	92	0	0.521	0.527	0.530	0.601	1.640	0.493	0.936	120	553	1297	1197	-0.942	444	853	413	784	0
1	10	19	"iYOR287C"	"iYOR287C"	4550	18490	140	484	498	290	54	59	24	98	93	0	346	389	318	90	93	25	85	82	0	1.680	1.485	1.607	1.760	1.680	1.201	0.673	156	592	686	743	0.748	430	256	444	299	0
1	11	19	"iYOR290C"	"iYOR290C"	4760	18490	130	1596	1566	961	54	68	123	94	87	0	551	566	344	92	100	105	82	72	0	3.359	3.190	3.198	3.572	1.656	3.079	0.942	120	642	2001	1986	1.748	1542	459	1512	474	0
1	12	19	"iYOR294W"	"iYOR294W"	4960	18490	130	1025	954	555	52	66	128	93	86	0	824	769	475	89	98	108	85	75	0	1.324	1.326	1.355	1.536	1.545	1.264	0.954	120	595	1708	1582	0.405	973	735	902	680	0
1	13	19	"iYOR311C"	"iYOR311C"	5160	18490	130	527	538	235	51	57	36	100	99	0	542	542	261	88	94	40	96	92	0	1.048	1.073	1.088	1.184	1.456	1.023	0.926	120	578	930	941	0.068	476	454	487	454	0
1	14	19	"iYOR315W"	"iYOR315W"	5350	18490	130	676	680	378	52	58	35	100	95	0	995	951	582	88	93	39	95	90	0	0.688	0.728	0.743	0.865	1.657	0.682	0.941	120	610	1531	1491	-0.540	624	907	628	863	0
1	15	19	"iYOR318C"	"iYOR318C"	5560	18490	140	1739	1778	1117	52	57	21	100	100	0	1433	1409	890	89	93	23	98	97	0	1.255	1.308	1.317	1.399	1.419	1.289	0.969	156	655	3031	3046	0.328	1687	1344	1726	1320	0
1	16	19	"iYOR337W"	"iYOR337W"	5750	18490	130	624	642	343	53	57	20	99	96	0	528	567	318	91	94	22	93	91	0	1.307	1.237	1.248	1.401	1.549	1.171	0.955	120	575	1008	1065	0.386	571	437	589	476	0
1	17	19	"iYOR341W"	"iYOR341W"	5950	18490	130	1714	1481	882	54	57	19	99	98	0	4113	3534	2337	89	93	23	100	100	0	0.413	0.414	0.421	0.461	1.417	0.391	0.975	120	612	5684	4872	-1.277	1660	4024	1427	3445	0
1	18	19	"iYORWdelta24"	"iYORWdelta24"	6150	18490	130	651	634	272	54	58	20	98	97	0	802	796	417	90	96	39	96	94	0	0.838	0.822	0.841	0.920	1.395	0.756	0.940	120	597	1309	1286	-0.254	597	712	580	706	0
1	19	19	"iYPL030W"	"iYPL030W"	6350	18490	130	581	557	279	53	56	17	99	95	0	571	535	270	89	92	25	94	90	0	1.095	1.130	1.123	1.217	1.478	1.091	0.947	120	615	1010	950	0.132	528	482	504	446	0
1	20	19	"iYPL026C"	"iYPL026C"	6550	18490	130	734	702	322	53	56	24	99	96	0	556	524	239	90	92	23	93	92	0	1.461	1.495	1.514	1.626	1.527	1.460	0.950	120	615	1147	1083	0.547	681	466	649	434	0
1	21	19	"iYPL022W"	"iYPL022W"	6760	18490	130	2176	1908	992	52	55	22	100	100	0	4478	3942	2238	90	95	34	100	100	0	0.484	0.482	0.484	0.511	1.259	0.463	0.979	120	693	6512	5708	-1.047	2124	4388	1856	3852	0
1	1	20	"iYPL005W"	"iYPL005W"	2740	18700	160	369	520	337	53	57	47	95	91	0	2106	2789	1870	86	90	39	100	99	0	0.156	0.173	0.166	0.170	1.419	0.172	0.923	208	1130	2336	3170	-2.676	316	2020	467	2703	0
1	2	20	"iYPL001W"	"iYPL001W"	2960	18700	140	185	201	96	51	55	18	94	90	0	903	878	533	87	89	22	98	96	0	0.164	0.190	0.180	0.207	2.040	0.167	0.780	156	780	950	941	-2.606	134	816	150	791	0
1	3	20	"itF(GAA)P1"	"itF(GAA)P1"	3170	18690	140	227	231	105	51	54	19	97	89	0	835	843	536	86	89	22	96	94	0	0.235	0.238	0.238	0.286	2.093	0.205	0.845	156	749	925	937	-2.089	176	749	180	757	0
1	4	20	"iYPR013C-1"	"iYPR013C-1"	3360	18690	130	1578	1457	794	53	59	25	100	98	0	580	504	243	87	92	26	91	90	0	3.093	3.367	3.388	3.636	1.520	3.444	0.922	120	690	2018	1821	1.629	1525	493	1404	417	0
1	5	20	"iYPR016C"	"iYPR016C"	3570	18690	130	422	406	191	55	62	30	95	90	0	434	414	207	86	103	275	61	14	0	1.055	1.070	1.038	1.100	1.785	0.282	0.224	120	689	715	679	0.077	367	348	351	328	0
1	6	20	"iYPR020W"	"iYPR020W"	3760	18700	140	320	316	152	54	59	31	95	90	0	1226	1109	625	88	102	253	84	70	0	0.234	0.257	0.260	0.283	1.678	0.243	0.889	156	816	1404	1283	-2.097	266	1138	262	1021	0
1	7	20	"iYPR035W"	"iYPR035W"	3950	18690	130	887	859	476	52	57	30	98	95	0	648	651	350	89	93	26	91	90	0	1.494	1.436	1.425	1.546	1.588	1.423	0.948	120	655	1394	1369	0.579	835	559	807	562	0
1	8	20	"iYPR042C"	"iYPR042C"	4170	18690	140	812	821	385	52	56	20	100	99	0	474	494	214	88	91	24	99	98	0	1.969	1.894	1.862	1.913	1.365	1.889	0.942	156	790	1146	1175	0.977	760	386	769	406	0
1	9	20	"iYPR047W"	"iYPR047W"	4370	18690	140	652	595	338	52	55	19	98	94	0	638	598	336	88	92	22	94	91	0	1.091	1.065	1.093	1.133	1.484	1.043	0.942	156	711	1150	1053	0.126	600	550	543	510	0
1	10	20	"iYCL001W-A"	"iYCL001W-A"	4560	18680	150	758	854	569	53	57	19	100	99	0	3943	4609	3327	88	96	112	100	100	0	0.183	0.177	0.176	0.183	1.454	0.171	0.958	156	778	4560	5322	-2.451	705	3855	801	4521	0
1	11	20	"iYCL007C"	"iYCL007C"	4770	18700	130	230	247	119	52	56	19	98	94	0	435	487	292	88	90	21	92	90	0	0.513	0.489	0.495	0.572	1.893	0.428	0.856	120	674	525	594	-0.963	178	347	195	399	0
1	12	20	"iYCL012W"	"iYCL012W"	4960	18690	140	859	980	623	52	57	23	100	97	0	5392	5664	4045	90	94	51	100	100	0	0.152	0.166	0.164	0.180	1.605	0.157	0.946	156	777	6109	6502	-2.716	807	5302	928	5574	0
1	13	20	"iYCR011C"	"iYCR011C"	5160	18690	130	580	584	290	52	59	27	97	96	0	565	559	283	91	95	36	93	89	0	1.114	1.137	1.148	1.272	1.656	1.100	0.904	120	677	1002	1000	0.156	528	474	532	468	0
1	14	20	"iYCRCdelta6-A"	"iYCRCdelta6-A"	5360	18700	120	310	326	144	53	58	23	95	94	0	317	314	123	89	118	519	1	0	0	1.127	1.213	1.244	1.167	1.820	1.172	0.807	120	638	485	498	0.173	257	228	273	225	0
1	15	20	"iYHR210C-A"	"iYHR210C-A"	5570	18700	140	2348	2446	1616	54	58	22	100	100	0	2517	2604	1693	91	115	463	85	74	0	0.946	0.952	0.944	0.938	1.455	0.890	0.836	156	803	4720	4905	-0.081	2294	2426	2392	2513	0
1	16	20	"iYHRCdelta14-C"	"iYHRCdelta14-C"	5770	18690	130	2500	2597	1698	53	57	19	100	100	0	3249	3357	2105	89	94	25	100	99	0	0.774	0.778	0.765	0.792	1.441	0.779	0.940	120	642	5607	5812	-0.369	2447	3160	2544	3268	0
1	17	20	"iYHRCdelta16-B"	"iYHRCdelta16-B"	5960	18700	140	1336	1614	1265	53	57	20	100	100	0	920	1151	797	89	93	23	99	98	0	1.544	1.470	1.389	1.398	1.510	1.538	0.958	156	798	2114	2623	0.627	1283	831	1561	1062	0
1	18	20	"iYLR157C-A"	"iYLR157C-A"	6160	18690	120	226	263	203	53	57	20	96	88	0	300	323	201	90	94	25	94	88	0	0.824	0.901	0.805	0.835	1.737	0.953	0.848	120	621	383	443	-0.280	173	210	210	233	0
1	19	20	"tE(UUC)C"	"tE(UUC)C"	6370	18690	130	241	268	148	52	54	15	97	96	0	311	312	134	89	92	20	94	91	0	0.851	0.969	0.886	0.952	1.768	0.979	0.752	120	712	411	439	-0.232	189	222	216	223	0
1	20	20	"tQ(UUG)L"	"tQ(UUG)L"	6570	18690	120	380	448	275	53	55	18	100	99	0	399	406	182	90	102	194	73	35	0	1.058	1.250	1.139	1.251	1.734	1.371	0.811	120	608	636	711	0.082	327	309	395	316	0
1	21	20	"YHRCTy1-1B"	"YHRCTy1-1B"	6770	18700	140	28497	27114	18993	53	57	20	100	100	3	17011	15391	10103	92	101	157	100	100	0	1.681	1.769	1.707	1.653	1.421	1.833	0.960	156	930	45363	42360	0.749	28444	16919	27061	15299	0
2	1	1	"VPS8"	"YAL002W"	7320	14960	160	1350	2469	2379	53	56	17	100	100	0	4227	6861	6363	89	94	31	100	99	0	0.313	0.357	0.341	0.343	1.532	0.360	0.950	208	935	5435	9188	-1.674	1297	4138	2416	6772	0
2	2	1	"MTW1"	"YAL034W-A"	7520	14960	160	1197	2235	2189	52	56	20	99	99	0	4879	7422	6610	93	98	34	100	99	0	0.239	0.298	0.287	0.284	1.540	0.311	0.954	208	683	5931	9512	-2.063	1145	4786	2183	7329	0
2	3	1	"YAL065C-A"	"YAL065C-A"	7720	14960	140	756	1439	1328	54	61	67	93	88	0	903	1575	1404	94	100	53	93	85	0	0.868	0.935	0.920	1.033	1.718	0.946	0.962	156	596	1511	2866	-0.205	702	809	1385	1481	0
2	4	1	"YAL004W"	"YAL004W"	7910	14960	150	1266	2006	1844	53	57	19	100	100	0	768	1163	1009	92	96	28	98	93	0	1.794	1.824	1.776	1.890	1.598	1.844	0.967	156	709	1889	3024	0.843	1213	676	1953	1071	0
2	5	1	"FUN12"	"YAL035W"	8120	14950	140	1847	2823	2655	53	56	18	100	100	0	1983	3195	3002	88	93	28	100	99	0	0.947	0.892	0.856	0.900	1.714	0.886	0.951	156	659	3689	5877	-0.079	1794	1895	2770	3107	0
2	6	1	"SEO1"	"YAL067C"	8300	14950	130	2032	2498	1782	52	55	16	100	100	0	2730	3058	2135	87	91	27	100	100	0	0.749	0.823	0.772	0.833	1.498	0.823	0.933	120	574	4623	5417	-0.417	1980	2643	2446	2971	0
2	7	1	"ERP2"	"YAL007C"	8500	14950	140	1445	1942	1583	53	57	20	100	100	0	3334	4592	3677	89	92	23	100	100	0	0.429	0.419	0.385	0.396	1.552	0.413	0.923	156	747	4637	6392	-1.221	1392	3245	1889	4503	0
2	8	1	"YAL037W"	"YAL037W"	8710	14920	160	937	1601	1420	52	61	49	96	93	0	979	1425	1156	90	94	36	94	90	0	0.996	1.160	1.121	1.193	1.738	1.203	0.941	208	932	1774	2884	-0.007	885	889	1549	1335	0
2	9	1	"YAL069W"	"YAL069W"	8910	14920	150	12459	15196	10860	54	63	54	100	100	0	7567	9526	6552	90	96	39	100	100	0	1.659	1.605	1.567	1.565	1.400	1.633	0.953	156	748	19882	24578	0.730	12405	7477	15142	9436	0
2	10	1	"SPO7"	"YAL009W"	9100	14930	160	1164	1784	1549	54	62	46	97	95	0	2318	3138	2551	89	97	58	99	98	0	0.498	0.567	0.538	0.521	1.583	0.579	0.942	208	895	3339	4779	-1.006	1110	2229	1730	3049	0
2	11	1	"CYC3"	"YAL039C"	9310	14930	140	1787	2396	2033	54	60	37	100	100	0	874	1217	978	89	95	38	96	90	0	2.208	2.076	2.033	2.134	1.661	2.135	0.922	156	690	2518	3470	1.143	1733	785	2342	1128	0
2	12	1	"YAR002W"	"YAR002W"	9510	14920	160	1282	2732	2656	52	55	17	98	97	0	3508	6176	5578	87	91	24	98	97	0	0.360	0.440	0.406	0.407	1.564	0.451	0.939	208	851	4651	8769	-1.476	1230	3421	2680	6089	0
2	13	1	"CNS1"	"YBR155W"	9710	14930	140	1685	2156	1798	50	54	25	100	100	0	2555	3829	3250	86	97	207	94	90	0	0.662	0.563	0.553	0.567	1.534	0.548	0.934	156	662	4104	5849	-0.595	1635	2469	2106	3743	0
2	14	1	"PCH2"	"YBR186W"	9890	14930	120	376	672	769	50	59	51	92	85	0	372	549	579	86	100	223	55	29	0	1.140	1.343	1.371	1.564	2.268	1.348	0.921	120	578	612	1085	0.189	326	286	622	463	0
2	15	1	"PYC2"	"YBR218C"	10100	14940	130	737	696	441	48	51	20	93	91	0	735	723	458	84	86	21	89	86	0	1.058	1.014	0.999	1.091	1.671	0.993	0.899	120	707	1340	1287	0.082	689	651	648	639	0
2	16	1	"ICS2"	"YBR157C"	10310	14940	140	1030	1235	915	48	49	11	100	99	0	469	590	403	87	89	19	92	92	0	2.571	2.360	2.358	2.486	1.619	2.383	0.928	156	804	1364	1690	1.362	982	382	1187	503	0
2	17	1	"NTC20"	"YBR188C"	10510	14940	140	767	1221	1097	48	50	13	99	98	0	1233	2037	1841	87	89	19	99	97	0	0.627	0.602	0.590	0.606	1.600	0.591	0.947	156	781	1865	3123	-0.673	719	1146	1173	1950	0
2	18	1	"YBR220C"	"YBR220C"	10720	14960	140	1096	1600	1434	49	51	16	100	100	0	576	876	728	85	88	19	100	100	0	2.132	1.961	1.945	1.973	1.536	2.001	0.923	156	684	1538	2342	1.092	1047	491	1551	791	0
2	19	1	"YBR159W"	"YBR159W"	10910	14930	140	2062	2034	1408	49	54	38	100	98	0	1506	1638	1097	86	91	35	97	95	0	1.418	1.279	1.271	1.332	1.543	1.291	0.948	156	753	3433	3537	0.503	2013	1420	1985	1552	0
2	20	1	"YBR190W"	"YBR190W"	11110	14940	120	454	518	347	50	53	15	95	93	0	508	558	382	86	88	21	92	86	0	0.957	0.992	1.011	1.088	1.567	0.949	0.927	120	580	826	940	-0.063	404	422	468	472	0
2	21	1	"FAT2"	"YBR222C"	11310	14940	120	686	790	543	49	52	14	100	98	0	342	413	287	83	84	17	85	82	0	2.459	2.245	2.215	2.434	1.858	2.156	0.875	120	692	896	1071	1.298	637	259	741	330	0
2	1	2	"YBR161W"	"YBR161W"	7330	15120	160	1498	2844	2566	54	58	20	99	98	0	1429	2264	1900	90	98	44	97	96	0	1.078	1.283	1.254	1.241	1.602	1.331	0.959	208	706	2783	4964	0.109	1444	1339	2790	2174	0
2	2	2	"RIM2"	"YBR192W"	7530	15130	140	1844	2384	1770	56	61	24	100	100	0	2694	3164	2150	94	102	44	99	99	0	0.688	0.758	0.716	0.730	1.436	0.783	0.944	156	374	4388	5398	-0.540	1788	2600	2328	3070	0
2	3	2	"YBR224W"	"YBR224W"	7710	15140	140	2552	3054	2156	56	61	21	100	100	0	654	788	516	94	98	28	93	91	0	4.457	4.320	4.312	4.628	1.676	4.408	0.927	156	535	3056	3692	2.156	2496	560	2998	694	0
2	4	2	"GPM2"	"YDL021W"	7920	15140	130	1681	1621	1100	55	59	21	100	100	0	4636	4423	3088	90	94	27	100	100	0	0.358	0.361	0.367	0.383	1.508	0.352	0.952	120	519	6172	5899	-1.483	1626	4546	1566	4333	0
2	5	2	"YDL053C"	"YDL053C"	8110	15120	140	1258	1669	1316	54	57	17	100	100	0	685	920	709	86	92	42	95	89	0	2.010	1.936	1.932	2.109	1.708	1.912	0.956	156	540	1803	2449	1.007	1204	599	1615	834	0
2	6	2	"YDL085W"	"YDL085W"	8310	15130	120	2730	2542	1651	54	57	17	100	100	0	1327	1292	812	87	93	45	97	93	0	2.158	2.065	2.064	2.230	1.579	2.095	0.945	120	490	3916	3693	1.110	2676	1240	2488	1205	0
2	7	2	"YDL023C"	"YDL023C"	8510	15150	130	1321	1811	1372	53	58	21	100	100	0	745	931	634	87	89	21	98	96	0	1.927	2.083	2.103	2.108	1.504	2.227	0.924	120	579	1926	2602	0.946	1268	658	1758	844	0
2	8	2	"PSA1"	"YDL055C"	8720	15130	130	623	630	402	53	60	27	97	92	0	854	847	569	87	90	24	94	90	0	0.743	0.759	0.765	0.856	1.729	0.726	0.936	120	606	1337	1337	-0.428	570	767	577	760	0
2	9	2	"LUC7"	"YDL087C"	8920	15140	130	3828	3421	1957	55	63	53	100	100	0	1405	1309	754	88	94	33	97	94	0	2.865	2.757	2.734	2.905	1.543	2.752	0.935	120	589	5090	4587	1.518	3773	1317	3366	1221	0
2	10	2	"YDL025C"	"YDL025C"	9110	15140	130	2668	2385	1073	56	66	55	100	100	0	1963	1773	837	90	98	48	98	98	0	1.395	1.384	1.379	1.448	1.403	1.396	0.938	120	590	4485	4012	0.480	2612	1873	2329	1683	0
2	11	2	"YDL057W"	"YDL057W"	9320	15130	120	1427	1399	916	55	65	53	98	94	0	1354	1363	965	91	99	49	95	90	0	1.086	1.057	1.084	1.182	1.616	1.008	0.930	120	538	2635	2616	0.119	1372	1263	1344	1272	0
2	12	2	"YDL089W"	"YDL089W"	9510	15140	140	395	440	290	53	57	18	98	94	0	612	653	415	90	93	25	91	89	0	0.655	0.687	0.679	0.707	1.753	0.678	0.906	156	600	864	950	-0.610	342	522	387	563	0
2	13	2	"YDL027C"	"YDL027C"	9710	15130	150	4631	3993	2247	52	58	30	100	100	0	2194	2042	1149	88	100	211	92	87	0	2.174	2.017	1.987	2.057	1.311	1.997	0.918	156	644	6685	5895	1.121	4579	2106	3941	1954	0
2	14	2	"RAD59"	"YDL059C"	9900	15140	130	2530	2172	918	52	62	53	100	98	0	999	894	425	88	102	217	88	80	0	2.720	2.630	2.642	2.891	1.574	2.618	0.896	120	609	3389	2926	1.444	2478	911	2120	806	0
2	15	2	"YDL091C"	"YDL091C"	10110	15150	140	3330	2816	1767	49	56	45	100	99	0	5152	4951	3128	84	88	29	100	100	0	0.647	0.569	0.557	0.563	1.439	0.564	0.960	156	738	8349	7634	-0.627	3281	5068	2767	4867	0
2	16	2	"RPA14"	"YDR156W"	10320	15140	110	316	439	353	48	50	11	98	91	0	285	380	296	86	89	21	83	77	0	1.347	1.330	1.249	1.394	1.830	1.276	0.877	80	486	467	685	0.429	268	199	391	294	0
2	17	2	"YDR187C"	"YDR187C"	10520	15150	120	303	617	662	49	51	12	100	95	0	212	441	454	87	89	19	88	82	0	2.032	1.605	1.762	1.779	1.728	1.523	0.916	120	586	379	922	1.023	254	125	568	354	0
2	18	2	"YDR219C"	"YDR219C"	10730	15140	150	83	153	163	50	55	30	51	37	0	119	183	175	87	90	21	59	44	0	1.031	1.073	0.901	1.002	2.760	0.946	0.807	156	606	65	199	0.044	33	32	103	96	-50
2	19	2	"HOM2"	"YDR158W"	10920	15150	130	7979	7250	3725	50	58	47	100	100	0	5926	5299	2887	90	95	39	100	100	0	1.359	1.382	1.383	1.417	1.355	1.356	0.956	120	534	13765	12409	0.442	7929	5836	7200	5209	0
2	20	2	"SLY1"	"YDR189W"	11120	15140	140	2342	2094	1299	50	58	46	99	97	0	3230	2959	1936	88	94	44	100	99	0	0.729	0.712	0.714	0.753	1.430	0.686	0.943	156	652	5434	4915	-0.455	2292	3142	2044	2871	0
2	21	2	"YDR221W"	"YDR221W"	11310	15150	130	1061	1101	793	50	51	12	100	99	0	629	664	440	84	98	203	72	60	0	1.855	1.812	1.833	1.965	1.818	1.861	0.909	120	658	1556	1631	0.891	1011	545	1051	580	0
2	1	3	"SSY1"	"YDR160W"	7330	15330	150	4292	4509	2876	54	57	16	100	100	0	3495	3471	2180	90	95	37	100	100	0	1.245	1.318	1.310	1.342	1.332	1.330	0.960	156	769	7643	7836	0.316	4238	3405	4455	3381	0
2	2	3	"HST4"	"YDR191W"	7520	15330	140	1635	1798	1304	55	60	21	100	100	0	2001	2012	1408	93	98	34	99	98	0	0.828	0.908	0.917	0.937	1.522	0.913	0.955	156	620	3488	3662	-0.272	1580	1908	1743	1919	0
2	3	3	"YDR223W"	"YDR223W"	7740	15340	90	459	576	385	56	63	28	96	88	0	457	606	441	93	97	27	86	82	0	1.107	1.014	1.021	1.101	1.490	0.938	0.914	52	388	767	1033	0.147	403	364	520	513	0
2	4	3	"NBP2"	"YDR162C"	7930	15340	120	261	543	602	53	56	18	97	94	0	313	600	630	89	91	20	95	90	0	0.929	0.959	0.931	0.986	1.815	0.954	0.953	120	563	432	1001	-0.107	208	224	490	511	0
2	5	3	"YDR193W"	"YDR193W"	8120	15330	130	1462	1386	814	52	54	14	100	100	0	1085	1011	577	87	90	39	97	95	0	1.413	1.444	1.426	1.486	1.560	1.453	0.918	120	610	2408	2258	0.499	1410	998	1334	924	0
2	6	3	"HTA1"	"YDR225W"	8330	15330	140	1688	1864	1290	53	55	16	100	99	0	1763	2127	1488	86	91	40	98	98	0	0.975	0.887	0.870	0.911	1.506	0.877	0.956	156	673	3312	3852	-0.037	1635	1677	1811	2041	0
2	7	3	"YDR539W"	"YDR539W"	8520	15340	130	1515	1494	883	52	56	23	100	100	0	2109	1964	1142	85	88	22	100	100	0	0.723	0.767	0.785	0.796	1.477	0.767	0.950	120	578	3487	3321	-0.468	1463	2024	1442	1879	0
2	8	3	"YEL025C"	"YEL025C"	8720	15330	130	1728	1936	1469	51	55	20	100	99	0	1838	1982	1435	84	88	30	100	99	0	0.956	0.993	1.009	0.997	1.511	1.005	0.957	120	629	3431	3783	-0.065	1677	1754	1885	1898	0
2	9	3	"YEL057C"	"YEL057C"	8920	15330	130	2224	2022	1191	52	57	22	100	100	0	2523	2241	1389	86	93	33	100	99	0	0.891	0.914	0.932	0.978	1.411	0.894	0.960	120	628	4609	4125	-0.166	2172	2437	1970	2155	0
2	10	3	"YDR541C"	"YDR541C"	9130	15340	130	1040	1182	848	53	58	25	99	95	0	1123	1368	1016	92	96	32	96	90	0	0.957	0.885	0.921	1.044	1.593	0.843	0.950	120	630	2018	2405	-0.063	987	1031	1129	1276	0
2	11	3	"CUP5"	"YEL027W"	9330	15340	130	1250	1446	1004	52	57	18	99	97	0	1919	2300	1672	90	93	24	100	99	0	0.655	0.631	0.634	0.677	1.545	0.609	0.952	120	625	3027	3604	-0.610	1198	1829	1394	2210	0
2	12	3	"SOM1"	"YEL059C-A"	9530	15330	130	1438	1514	1072	53	57	18	100	99	0	881	950	671	89	91	21	93	92	0	1.749	1.697	1.739	1.874	1.699	1.673	0.944	120	561	2177	2322	0.806	1385	792	1461	861	0
2	13	3	"YDR543C"	"YDR543C"	9720	15350	120	412	507	390	53	56	17	99	93	0	485	570	427	88	92	29	83	80	0	0.904	0.942	0.945	1.060	1.965	0.926	0.913	120	544	756	936	-0.145	359	397	454	482	0
2	14	3	"YEL029C"	"YEL029C"	9930	15350	130	1458	1344	862	51	54	15	100	97	0	3516	3248	2135	86	89	22	100	100	0	0.410	0.409	0.398	0.426	1.496	0.400	0.947	120	621	4837	4455	-1.286	1407	3430	1293	3162	0
2	15	3	"PRB1"	"YEL060C"	10130	15350	120	263	306	211	48	51	11	95	92	0	321	379	271	82	83	18	86	83	0	0.900	0.869	0.843	0.924	1.998	0.808	0.885	120	528	454	555	-0.153	215	239	258	297	0
2	16	3	"YRF1-1"	"YDR545W"	10330	15330	130	2522	3150	2806	49	50	11	100	100	0	1915	2635	2247	83	86	19	100	100	0	1.350	1.215	1.182	1.224	1.494	1.230	0.955	120	667	4305	5653	0.433	2473	1832	3101	2552	0
2	17	3	"SPF1"	"YEL031W"	10550	15340	110	196	233	160	50	52	13	91	77	0	256	293	209	85	86	18	72	68	0	0.854	0.880	0.859	0.970	2.501	0.798	0.855	80	497	317	391	-0.228	146	171	183	208	0
2	18	3	"NPR2"	"YEL062W"	10730	15330	130	831	1396	1191	51	53	15	100	100	0	1809	3092	2790	86	90	35	99	99	0	0.453	0.447	0.451	0.479	1.599	0.430	0.960	120	580	2503	4351	-1.143	780	1723	1345	3006	0
2	19	3	"PES4"	"YFR023W"	10930	15340	140	1303	1892	1497	51	54	21	100	99	0	2880	4013	3182	87	93	36	100	100	0	0.448	0.469	0.472	0.484	1.617	0.463	0.954	156	603	4045	5767	-1.158	1252	2793	1841	3926	0
2	20	3	"HXK1"	"YFR053C"	11110	15350	130	1418	2269	1638	52	60	40	100	97	0	2216	3210	2263	89	101	55	100	97	0	0.642	0.710	0.707	0.719	1.522	0.718	0.949	120	552	3493	5338	-0.639	1366	2127	2217	3121	0
2	21	3	"SCW11"	"YGL028C"	11310	15340	130	2872	2440	1442	51	58	35	99	95	0	4442	3722	2304	88	113	222	89	84	0	0.648	0.657	0.662	0.719	1.473	0.644	0.958	120	685	7175	6023	-0.626	2821	4354	2389	3634	0
2	1	4	"YFR024C-A"	"YFR024C-A"	7320	15540	120	280	457	446	54	56	14	97	91	0	580	904	895	89	92	21	94	90	0	0.460	0.494	0.496	0.530	1.868	0.490	0.961	120	602	717	1218	-1.119	226	491	403	815	0
2	2	4	"YFR055W"	"YFR055W"	7530	15530	150	2888	3089	2202	55	58	17	100	100	0	2350	2560	1712	91	94	24	100	100	0	1.254	1.229	1.211	1.216	1.421	1.259	0.962	156	718	5092	5503	0.327	2833	2259	3034	2469	0
2	3	4	"RPL30"	"YGL030W"	7730	15540	130	1342	1163	723	54	58	22	99	94	0	2151	1814	1142	90	95	25	96	95	0	0.625	0.643	0.655	0.708	1.613	0.644	0.956	120	615	3349	2833	-0.678	1288	2061	1109	1724	0
2	4	4	"YFR026C"	"YFR026C"	7930	15540	130	2391	2361	1466	54	59	26	100	100	0	2220	2061	1261	90	94	25	100	100	0	1.097	1.170	1.154	1.228	1.439	1.198	0.954	120	605	4467	4278	0.134	2337	2130	2307	1971	0
2	5	4	"YFR057W"	"YFR057W"	8120	15540	120	165	296	412	52	56	25	83	75	0	202	329	441	89	93	28	77	72	0	1.000	1.017	1.051	0.980	2.378	0.948	0.963	120	586	226	484	0.000	113	113	244	240	0
2	6	4	"AGA2"	"YGL032C"	8340	15540	130	1767	1639	965	52	55	17	100	99	0	2665	2395	1502	86	91	31	100	100	0	0.665	0.687	0.668	0.709	1.476	0.657	0.958	120	610	4294	3896	-0.589	1715	2579	1587	2309	0
2	7	4	"CDC14"	"YFR028C"	8520	15550	130	1372	2007	1593	53	58	27	100	100	0	1023	1351	989	86	94	47	95	91	0	1.408	1.545	1.462	1.603	1.568	1.661	0.925	120	621	2256	3219	0.493	1319	937	1954	1265	0
2	8	4	"ERP6"	"YGL002W"	8730	15540	130	3044	2613	1534	54	59	29	100	100	0	4137	3704	2238	86	96	48	100	100	0	0.738	0.707	0.712	0.739	1.266	0.681	0.964	120	629	7041	6177	-0.438	2990	4051	2559	3618	0
2	9	4	"YGL034C"	"YGL034C"	8920	15540	120	225	336	300	51	55	18	90	83	0	247	349	295	87	90	23	82	78	0	1.087	1.088	1.099	1.100	1.882	1.041	0.937	120	593	334	547	0.121	174	160	285	262	0
2	10	4	"RPL11B"	"YGR085C"	9130	15540	130	2690	3087	2134	53	62	54	100	95	0	2468	2539	1727	92	97	38	99	95	0	1.110	1.240	1.266	1.295	1.432	1.254	0.966	120	630	5013	5481	0.150	2637	2376	3034	2447	0
2	11	4	"YGR117C"	"YGR117C"	9330	15540	120	2846	2623	1548	53	63	56	99	97	0	7301	6923	4236	90	98	44	100	100	0	0.387	0.376	0.372	0.389	1.369	0.366	0.961	120	575	10004	9403	-1.368	2793	7211	2570	6833	0
2	12	4	"YGR149W"	"YGR149W"	9530	15530	130	1427	2163	1803	52	58	28	100	98	0	2548	3512	2902	89	96	41	99	97	0	0.559	0.617	0.617	0.649	1.453	0.621	0.961	120	659	3834	5534	-0.839	1375	2459	2111	3423	0
2	13	4	"PDC6"	"YGR087C"	9740	15530	130	1326	2042	1565	52	57	25	100	100	0	787	1092	750	86	92	38	95	95	0	1.817	1.978	1.989	2.093	1.675	2.050	0.952	120	578	1975	2996	0.862	1274	701	1990	1006	0
2	14	4	"NUP57"	"YGR119C"	9940	15550	140	1700	2447	1924	52	55	16	100	100	0	2128	3185	2565	85	88	22	100	99	0	0.807	0.773	0.798	0.849	1.493	0.758	0.964	156	644	3691	5495	-0.310	1648	2043	2395	3100	0
2	15	4	"YGR151C"	"YGR151C"	10140	15550	150	1320	1129	627	51	54	15	99	98	0	1585	1289	744	84	86	21	96	90	0	0.845	0.895	0.894	1.037	1.776	0.870	0.954	156	673	2770	2283	-0.242	1269	1501	1078	1205	0
2	16	4	"YGR089W"	"YGR089W"	10330	15530	130	1365	2003	1815	51	54	16	100	100	0	1283	1529	1211	84	86	21	100	100	0	1.096	1.351	1.295	1.315	1.413	1.429	0.944	120	610	2513	3397	0.132	1314	1199	1952	1445	0
2	17	4	"MEP1"	"YGR121C"	10530	15540	130	1906	3393	2766	51	57	56	100	97	0	1017	1572	1177	86	90	24	99	96	0	1.992	2.249	2.252	2.220	1.438	2.354	0.961	120	682	2786	4828	0.995	1855	931	3342	1486	0
2	18	4	"YGR153W"	"YGR153W"	10750	15550	130	2129	2449	1784	52	56	22	100	100	0	1263	1392	1017	86	95	82	90	79	0	1.765	1.835	1.897	2.129	1.717	1.819	0.949	120	643	3254	3703	0.819	2077	1177	2397	1306	0
2	19	4	"PRP31"	"YGR091W"	10940	15540	130	1843	1964	1289	51	55	18	100	100	0	1812	1808	1215	84	92	83	93	84	0	1.037	1.110	1.124	1.263	1.610	1.091	0.961	120	571	3520	3637	0.052	1792	1728	1913	1724	0
2	20	4	"PPT1"	"YGR123C"	11140	15550	130	1905	2060	1386	52	56	23	100	100	0	1700	1659	1126	86	93	37	97	94	0	1.148	1.277	1.293	1.425	1.540	1.268	0.962	120	633	3467	3581	0.199	1853	1614	2008	1573	0
2	21	4	"CYS4"	"YGR155W"	11350	15540	130	2465	2222	1408	51	54	17	100	100	0	1269	1167	723	83	91	91	89	85	0	2.035	2.003	2.036	2.323	1.876	2.005	0.957	120	738	3600	3255	1.025	2414	1186	2171	1084	0
2	1	5	"SET1"	"YHR119W"	7350	15740	130	939	1323	1150	53	56	17	100	99	0	1790	2442	2090	91	94	22	100	99	0	0.521	0.540	0.553	0.555	1.555	0.537	0.962	120	698	2585	3621	-0.939	886	1699	1270	2351	0
2	2	5	"YHR149C"	"YHR149C"	7550	15740	130	518	720	571	53	57	18	98	96	0	607	994	854	90	94	23	93	91	0	0.899	0.738	0.791	0.880	1.780	0.696	0.967	120	575	982	1571	-0.153	465	517	667	904	0
2	3	5	"YHR181W"	"YHR181W"	7740	15730	130	279	421	379	53	59	29	93	85	0	340	496	423	91	94	25	84	83	0	0.908	0.909	0.905	0.933	1.807	0.888	0.928	120	600	475	773	-0.140	226	249	368	405	0
2	4	5	"YHR121W"	"YHR121W"	7950	15730	110	1687	1656	1153	54	61	33	95	92	0	866	827	577	87	90	28	82	78	0	2.096	2.165	2.308	2.726	1.990	2.124	0.951	80	511	2412	2342	1.068	1633	779	1602	740	0
2	5	5	"YHR151C"	"YHR151C"	8140	15740	120	377	714	735	52	55	19	96	95	0	306	538	536	86	89	28	87	79	0	1.477	1.465	1.490	1.632	1.779	1.418	0.948	120	567	545	1114	0.563	325	220	662	452	0
2	6	5	"GND1"	"YHR183W"	8340	15740	120	621	675	460	51	53	15	98	95	0	1291	1398	1077	86	88	26	93	91	0	0.473	0.476	0.494	0.591	1.894	0.442	0.933	120	589	1775	1936	-1.080	570	1205	624	1312	0
2	7	5	"EPT1"	"YHR123W"	8550	15740	100	473	689	581	52	54	15	97	95	0	484	677	562	85	87	21	83	81	0	1.055	1.076	1.087	1.243	1.950	1.051	0.952	80	452	820	1229	0.077	421	399	637	592	0
2	8	5	"SPO16"	"YHR153C"	8740	15740	130	709	1093	1083	53	56	18	100	99	0	678	988	863	83	87	28	96	95	0	1.103	1.149	1.138	1.259	1.747	1.184	0.852	120	673	1251	1945	0.141	656	595	1040	905	0
2	9	5	"ADY1"	"YHR185C"	8950	15740	100	256	390	336	51	55	21	88	80	0	297	473	413	85	92	70	70	57	0	0.967	0.874	0.901	0.924	2.149	0.792	0.844	80	487	417	727	-0.048	205	212	339	388	0
2	10	5	"YHR125W"	"YHR125W"	9150	15740	120	3004	3529	2479	52	59	41	100	100	0	790	932	627	89	92	29	90	86	0	4.211	4.125	4.185	4.977	1.924	4.162	0.942	120	607	3653	4320	2.074	2952	701	3477	843	0
2	11	5	"YHR155W"	"YHR155W"	9360	15750	120	1027	1217	920	52	56	21	100	96	0	735	886	636	86	91	27	95	95	0	1.502	1.456	1.502	1.514	1.461	1.465	0.953	120	596	1624	1965	0.587	975	649	1165	800	0
2	12	5	"IKI1"	"YHR187W"	9560	15750	130	235	393	320	52	56	24	95	86	0	215	332	265	87	128	743	9	0	0	1.430	1.392	1.425	1.545	1.688	0.844	0.436	120	623	311	586	0.516	183	128	341	245	0
2	13	5	"YHC3"	"YJL059W"	9740	15730	130	665	1265	1187	51	55	18	100	100	0	1413	2696	2627	84	122	739	64	47	0	0.462	0.465	0.469	0.508	1.639	0.452	0.968	120	630	1943	3826	-1.114	614	1329	1214	2612	0
2	14	5	"YJL091C"	"YJL091C"	9940	15740	110	725	723	541	51	54	16	98	95	0	1080	1029	800	84	87	22	87	83	0	0.677	0.711	0.742	0.908	2.356	0.682	0.955	80	496	1670	1617	-0.563	674	996	672	945	0
2	15	5	"YJL123C"	"YJL123C"	10140	15740	130	2733	4071	3050	53	56	19	100	100	0	1622	2050	1536	83	87	22	100	99	0	1.741	2.043	2.068	2.270	1.488	2.038	0.962	120	630	4219	5985	0.800	2680	1539	4018	1967	0
2	16	5	"NUP82"	"YJL061W"	10350	15750	120	1939	2170	1634	51	55	20	100	100	0	1587	1885	1349	84	87	23	100	99	0	1.256	1.177	1.184	1.169	1.460	1.197	0.958	120	586	3391	3920	0.329	1888	1503	2119	1801	0
2	17	5	"TOK1"	"YJL093C"	10540	15750	130	2510	3440	2561	50	55	58	100	100	0	1449	1602	1118	85	89	36	100	97	0	1.804	2.235	2.271	2.337	1.446	2.297	0.959	120	621	3824	4907	0.851	2460	1364	3390	1517	0
2	18	5	"GCD14"	"YJL125C"	10740	15740	130	5785	4656	2826	50	54	25	100	100	0	5054	3747	2426	85	92	82	100	95	0	1.154	1.258	1.269	1.388	1.416	1.248	0.970	120	614	10704	8268	0.207	5735	4969	4606	3662	0
2	19	5	"MRPL8"	"YJL063C"	10940	15740	130	600	804	539	51	56	26	100	97	0	375	472	284	84	92	78	88	79	0	1.887	1.941	1.958	1.974	1.461	1.941	0.925	120	613	840	1141	0.916	549	291	753	388	0
2	20	5	"BCK1"	"YJL095W"	11130	15750	120	1042	1619	1425	51	54	19	100	99	0	1929	2842	2554	82	87	22	99	99	0	0.537	0.568	0.567	0.596	1.567	0.560	0.967	120	620	2838	4328	-0.898	991	1847	1568	2760	0
2	21	5	"SPT10"	"YJL127C"	11360	15740	110	339	346	236	50	53	20	91	86	0	322	336	224	80	83	24	76	72	0	1.194	1.156	1.081	1.208	1.615	1.141	0.875	80	600	531	552	0.256	289	242	296	256	0
2	1	6	"YJL065C"	"YJL065C"	7360	15940	130	928	1262	997	52	56	20	99	98	0	421	545	392	91	94	22	90	83	0	2.655	2.665	2.638	2.873	1.786	2.684	0.915	120	693	1206	1664	1.408	876	330	1210	454	0
2	2	6	"YJL097W"	"YJL097W"	7560	15940	140	1513	1819	1316	52	55	18	100	100	0	1224	1403	969	90	93	20	99	99	0	1.288	1.346	1.325	1.348	1.477	1.363	0.951	156	594	2595	3080	0.366	1461	1134	1767	1313	0
2	3	6	"TRK1"	"YJL129C"	7740	15930	140	1627	2916	2924	51	55	17	100	100	0	1178	2056	1975	87	90	21	100	99	0	1.445	1.455	1.435	1.527	1.600	1.479	0.958	156	643	2667	4834	0.531	1576	1091	2865	1969	0
2	4	6	"OAR1"	"YKL055C"	7950	15940	130	848	1199	993	52	57	27	100	100	0	728	1100	916	84	86	25	96	91	0	1.236	1.129	1.173	1.289	1.758	1.109	0.953	120	679	1440	2163	0.306	796	644	1147	1016	0
2	5	6	"CYT2"	"YKL087C"	8160	15940	120	622	1324	1463	51	54	16	84	80	0	602	1448	1674	82	84	24	75	71	0	1.098	0.932	0.921	1.080	2.336	0.891	0.954	120	573	1091	2639	0.135	571	520	1273	1366	0
2	6	6	"YKL118W"	"YKL118W"	8350	15940	130	891	797	503	51	55	17	100	94	0	1305	1153	779	85	88	22	92	88	0	0.689	0.699	0.709	0.860	1.785	0.670	0.938	120	609	2060	1814	-0.538	840	1220	746	1068	0
2	7	6	"NUP120"	"YKL057C"	8550	15940	130	865	1245	1116	51	55	19	98	96	0	1410	2157	2069	85	89	28	94	90	0	0.614	0.576	0.601	0.734	2.128	0.549	0.956	120	651	2139	3266	-0.703	814	1325	1194	2072	0
2	8	6	"MIF2"	"YKL089W"	8750	15950	130	1513	2714	2778	51	54	18	100	100	0	787	1515	1491	83	85	20	98	96	0	2.077	1.860	1.795	1.955	1.898	1.887	0.954	120	593	2166	4095	1.054	1462	704	2663	1432	0
2	9	6	"OAC1"	"YKL120W"	8930	15950	120	511	505	356	51	54	19	98	91	0	554	636	471	82	88	65	82	75	0	0.975	0.819	0.779	0.933	2.036	0.742	0.777	120	555	932	1008	-0.037	460	472	454	554	0
2	10	6	"YKL059C"	"YKL059C"	9150	15950	120	1198	1706	1595	51	55	19	100	100	0	1057	1977	1901	88	90	21	100	100	0	1.184	0.876	0.862	0.953	1.587	0.849	0.948	120	641	2116	3544	0.243	1147	969	1655	1889	0
2	11	6	"YKL091C"	"YKL091C"	9370	15940	110	806	1028	788	53	62	75	93	87	0	484	539	369	89	98	82	85	67	0	1.906	2.167	2.304	2.276	1.945	2.218	0.898	80	537	1148	1425	0.931	753	395	975	450	0
2	12	6	"SRP21"	"YKL122C"	9560	15940	110	607	672	465	53	62	78	90	78	0	1134	1202	900	87	143	832	56	27	0	0.529	0.555	0.559	0.684	2.197	0.526	0.922	80	501	1601	1734	-0.918	554	1047	619	1115	0
2	13	6	"YKL061W"	"YKL061W"	9750	15950	130	818	996	688	51	57	22	100	98	0	2149	2896	2168	85	123	719	76	64	0	0.372	0.336	0.325	0.365	1.770	0.318	0.923	120	666	2831	3756	-1.428	767	2064	945	2811	0
2	14	6	"MBR1"	"YKL093W"	9960	15950	120	2237	2380	1478	52	55	20	100	100	0	5516	5455	3517	87	90	23	100	100	0	0.402	0.434	0.433	0.460	1.489	0.420	0.938	120	589	7614	7696	-1.313	2185	5429	2328	5368	0
2	15	6	"SSH4"	"YKL124W"	10150	15950	120	3247	3473	2061	52	55	16	100	100	0	3937	3906	2362	83	87	22	100	100	0	0.829	0.895	0.889	0.924	1.468	0.886	0.941	120	558	7049	7244	-0.271	3195	3854	3421	3823	0
2	16	6	"YLR040C"	"YLR040C"	10350	15950	120	1085	1357	1122	52	55	20	99	96	0	847	1142	918	82	85	23	95	94	0	1.350	1.231	1.214	1.278	1.554	1.235	0.948	120	544	1798	2365	0.433	1033	765	1305	1060	0
2	17	6	"YLR072W"	"YLR072W"	10550	15940	100	351	397	284	49	52	14	91	86	0	432	464	336	81	84	22	82	76	0	0.860	0.909	0.859	0.911	1.798	0.883	0.921	80	462	653	731	-0.217	302	351	348	383	0
2	18	6	"YLR104W"	"YLR104W"	10750	15950	120	197	424	388	48	50	13	95	90	0	239	551	504	82	84	20	84	80	0	0.949	0.802	0.816	0.905	2.168	0.752	0.883	120	577	306	845	-0.075	149	157	376	469	0
2	19	6	"YLR042C"	"YLR042C"	10940	15950	130	1748	1709	1236	50	53	14	100	98	0	1516	1715	1338	83	86	20	100	95	0	1.185	1.017	1.026	1.119	1.606	0.970	0.949	120	670	3131	3291	0.245	1698	1433	1659	1632	0
2	20	6	"YLR074C"	"YLR074C"	11170	15950	110	704	733	548	52	56	20	91	83	0	614	690	533	84	87	23	76	75	0	1.230	1.124	1.147	1.185	1.837	1.073	0.935	80	564	1182	1287	0.299	652	530	681	606	0
2	21	6	"YLR106C"	"YLR106C"	11360	15960	110	824	789	524	50	53	19	100	96	0	1309	1161	821	81	83	22	96	85	0	0.630	0.684	0.715	0.863	2.004	0.661	0.941	80	588	2002	1819	-0.666	774	1228	739	1080	0
2	1	7	"PDC1"	"YLR044C"	7360	16150	120	1026	1249	1145	52	56	19	100	100	0	906	1440	1367	92	95	24	99	98	0	1.197	0.888	0.887	0.966	1.682	0.852	0.905	120	627	1788	2545	0.259	974	814	1197	1348	0
2	2	7	"YLR076C"	"YLR076C"	7560	16140	140	574	842	725	52	55	17	99	98	0	495	686	549	89	92	21	94	89	0	1.286	1.323	1.334	1.459	1.816	1.331	0.943	156	626	928	1387	0.363	522	406	790	597	0
2	3	7	"YLR108C"	"YLR108C"	7750	16150	120	704	1192	1163	51	54	15	100	99	0	522	894	877	85	87	19	94	89	0	1.494	1.410	1.390	1.633	1.830	1.375	0.914	120	539	1090	1950	0.579	653	437	1141	809	0
2	4	7	"YLR046C"	"YLR046C"	7950	16150	120	1123	1518	1230	51	54	14	100	100	0	645	839	641	85	90	22	95	94	0	1.914	1.946	1.996	2.113	1.721	1.970	0.941	120	578	1632	2221	0.937	1072	560	1467	754	0
2	5	7	"BOS1"	"YLR078C"	8150	16150	120	1582	1856	1239	50	52	15	100	100	0	1958	2247	1459	80	81	24	100	97	0	0.816	0.833	0.815	0.852	1.455	0.834	0.936	120	613	3410	3973	-0.294	1532	1878	1806	2167	0
2	6	7	"YLR110C"	"YLR110C"	8350	16120	80	136	642	924	52	78	188	40	34	0	103	350	441	68	80	87	40	38	0	2.400	2.092	1.818	2.226	2.534	2.217	0.815	52	326	119	872	1.263	84	35	590	282	-100
2	7	7	"YLR423C"	"YLR423C"	8560	16150	120	1062	1849	1696	51	72	157	94	77	0	1257	2251	2124	79	89	77	95	93	0	0.858	0.828	0.815	0.870	1.611	0.797	0.940	120	595	2189	3970	-0.221	1011	1178	1798	2172	0
2	8	7	"YLR455W"	"YLR455W"	8750	16150	130	1799	2149	1634	50	54	20	100	98	0	2078	2208	1682	84	87	23	99	97	0	0.877	0.988	0.991	1.049	1.633	0.981	0.936	120	514	3743	4223	-0.189	1749	1994	2099	2124	0
2	9	7	"PSP2"	"YML017W"	8940	16140	150	65	118	133	50	53	18	43	33	0	97	160	171	83	86	20	44	32	0	1.071	0.883	0.816	0.731	3.152	0.756	0.751	156	682	29	145	0.100	15	14	68	77	-50
2	10	7	"TUS1"	"YLR425W"	9150	16150	120	1567	1717	1442	52	55	17	99	98	0	1088	1272	1099	85	88	21	97	95	0	1.510	1.403	1.403	1.583	1.794	1.372	0.917	120	557	2518	2852	0.595	1515	1003	1665	1187	0
2	11	7	"NBP1"	"YLR457C"	9350	16150	120	861	1432	1379	54	59	40	95	92	0	1134	1958	1983	88	96	79	95	81	0	0.772	0.737	0.719	0.780	1.896	0.701	0.912	120	597	1853	3248	-0.374	807	1046	1378	1870	0
2	12	7	"OST6"	"YML019W"	9550	16150	120	1823	1854	1369	54	63	73	92	84	0	3013	3217	2449	88	99	82	94	85	0	0.605	0.575	0.567	0.629	1.599	0.563	0.938	120	574	4694	4929	-0.726	1769	2925	1800	3129	0
2	13	7	"YLR427W"	"YLR427W"	9750	16150	120	1775	3034	2721	51	57	22	100	100	0	1244	1882	1650	85	90	32	99	95	0	1.487	1.660	1.639	1.762	1.758	1.683	0.929	120	541	2883	4780	0.573	1724	1159	2983	1797	0
2	14	7	"CDC91"	"YLR459W"	9950	16160	140	1167	1792	1778	52	56	20	98	97	0	1153	1679	1687	83	87	23	98	98	0	1.042	1.090	1.056	1.135	1.619	1.071	0.936	156	656	2185	3336	0.059	1115	1070	1740	1596	0
2	15	7	"UNG1"	"YML021C"	10140	16150	120	1901	2520	1945	52	56	20	100	98	0	1243	1557	1206	81	84	21	95	93	0	1.591	1.672	1.697	1.877	1.650	1.678	0.926	120	516	3011	3944	0.670	1849	1162	2468	1476	0
2	16	7	"CRN1"	"YLR429W"	10340	16140	140	2371	3747	3241	53	58	25	100	99	0	1502	1966	1502	81	85	23	99	98	0	1.631	1.960	1.955	1.940	1.567	2.104	0.933	156	655	3739	5579	0.706	2318	1421	3694	1885	0
2	17	7	"PAU4"	"YLR461W"	10540	16150	120	4730	5522	4214	53	61	46	100	100	0	4609	5148	4027	85	97	100	100	99	0	1.034	1.080	1.051	1.102	1.485	1.073	0.935	120	590	9201	10532	0.048	4677	4524	5469	5063	0
2	18	7	"YML023C"	"YML023C"	10750	16150	130	1371	1931	1616	50	56	42	99	93	0	1374	1771	1473	83	94	99	84	78	0	1.023	1.114	1.157	1.252	1.828	1.110	0.910	120	598	2612	3569	0.033	1321	1291	1881	1688	0
2	19	7	"YMR187C"	"YMR187C"	10940	16150	120	239	471	471	50	54	27	93	85	0	476	960	1037	82	89	65	84	77	0	0.480	0.479	0.480	0.567	2.123	0.451	0.931	120	583	583	1299	-1.060	189	394	421	878	0
2	20	7	"TRS130"	"YMR218C"	11160	16150	100	224	232	162	50	51	14	80	72	0	386	363	279	82	85	20	72	65	0	0.572	0.648	0.644	0.695	2.242	0.594	0.886	80	521	478	463	-0.805	174	304	182	281	0
2	21	7	"YMR251W"	"YMR251W"	11370	16150	80	142	141	67	50	51	13	84	71	0	222	193	106	81	84	46	67	55	0	0.652	0.813	0.727	0.646	2.788	0.674	0.795	52	320	233	203	-0.616	92	141	91	112	0
2	1	8	"GCV2"	"YMR189W"	7370	16340	110	226	358	318	53	57	21	91	73	0	316	687	712	89	93	25	80	78	0	0.762	0.510	0.527	0.658	2.458	0.458	0.952	80	507	400	903	-0.392	173	227	305	598	0
2	2	8	"ERG8"	"YMR220W"	7550	16340	120	506	1806	2277	53	55	16	100	97	0	668	2381	3027	90	92	20	99	97	0	0.784	0.765	0.772	0.825	1.619	0.754	0.980	120	534	1031	4044	-0.352	453	578	1753	2291	0
2	3	8	"YMR252C"	"YMR252C"	7750	16350	130	594	963	856	52	55	17	100	95	0	712	1115	976	87	89	20	95	90	0	0.867	0.886	0.898	0.944	1.540	0.880	0.972	120	646	1167	1939	-0.206	542	625	911	1028	0
2	4	8	"YMR191W"	"YMR191W"	7970	16340	100	459	612	526	51	54	18	96	92	0	249	379	335	87	90	21	78	73	0	2.519	1.921	2.043	2.303	1.654	1.727	0.934	80	473	570	853	1.333	408	162	561	292	0
2	5	8	"YMR222C"	"YMR222C"	8160	16340	110	300	575	601	51	54	16	95	86	0	297	489	487	84	87	20	80	78	0	1.169	1.294	1.277	1.327	2.072	1.261	0.960	80	517	462	929	0.225	249	213	524	405	0
2	6	8	"YMR254C"	"YMR254C"	8360	16350	110	336	646	669	50	58	79	75	62	0	338	660	703	71	77	48	72	67	0	1.071	1.012	1.057	1.138	1.823	0.974	0.980	80	602	553	1185	0.099	286	267	596	589	0
2	7	8	"YMR193C-A"	"YMR193C-A"	8590	16330	100	415	704	702	48	66	142	71	56	0	201	343	314	61	73	73	62	48	0	2.621	2.326	2.339	2.451	2.089	2.316	0.927	80	407	507	938	1.390	367	140	656	282	0
2	8	8	"MRE11"	"YMR224C"	8740	16340	150	97	153	154	49	56	77	38	23	0	122	207	213	75	80	46	51	38	0	1.021	0.788	0.696	0.633	2.550	0.723	0.884	156	732	95	236	0.030	48	47	104	132	-50
2	9	8	"COX7"	"YMR256C"	8970	16340	120	376	435	317	50	54	17	95	88	0	791	940	742	85	88	25	94	88	0	0.462	0.450	0.440	0.503	1.672	0.430	0.946	120	578	1032	1240	-1.115	326	706	385	855	0
2	10	8	"NAR1"	"YNL240C"	9160	16350	130	1318	1446	975	52	58	30	100	95	0	589	646	417	85	95	55	86	80	0	2.512	2.485	2.486	2.704	1.469	2.458	0.961	120	670	1770	1955	1.329	1266	504	1394	561	0
2	11	8	"SEC2"	"YNL272C"	9370	16340	110	2554	3045	2294	53	60	33	100	100	0	2622	3550	2814	88	102	68	100	97	0	0.987	0.864	0.880	0.943	1.385	0.833	0.972	80	499	5035	6454	-0.019	2501	2534	2992	3462	0
2	12	8	"YPT11"	"YNL304W"	9560	16340	120	1791	2369	1915	53	58	19	100	100	0	986	1326	1067	87	91	26	96	94	0	1.933	1.869	1.936	2.110	1.558	1.848	0.975	120	564	2637	3555	0.951	1738	899	2316	1239	0
2	13	8	"YNL242W"	"YNL242W"	9760	16350	120	1846	2508	2130	51	55	18	100	99	0	2466	3554	3161	84	87	21	100	100	0	0.754	0.708	0.708	0.742	1.434	0.687	0.977	120	544	4177	5927	-0.408	1795	2382	2457	3470	0
2	14	8	"YNL274C"	"YNL274C"	9960	16350	120	2002	2073	1262	52	55	18	100	100	0	2809	2806	1806	83	86	24	100	100	0	0.715	0.742	0.759	0.785	1.240	0.721	0.978	120	560	4676	4744	-0.483	1950	2726	2021	2723	0
2	15	8	"YNL306W"	"YNL306W"	10180	16350	120	1585	1725	1181	52	56	18	100	99	0	817	901	612	81	85	23	95	94	0	2.083	2.040	2.069	2.218	1.444	1.999	0.966	120	542	2269	2493	1.059	1533	736	1673	820	0
2	16	8	"SUI1"	"YNL244C"	10370	16350	120	641	1034	847	52	56	19	99	96	0	408	517	365	82	86	22	90	86	0	1.807	2.257	2.289	2.395	1.544	2.321	0.963	120	532	915	1417	0.853	589	326	982	435	0
2	17	8	"YNL276C"	"YNL276C"	10570	16350	120	225	555	594	52	57	35	91	85	0	248	560	600	84	94	97	65	45	0	1.055	1.057	1.063	1.257	1.801	1.011	0.977	120	563	337	979	0.077	173	164	503	476	0
2	18	8	"KRI1"	"YNL308C"	10770	16340	120	952	1451	1353	52	62	42	96	90	0	1243	2157	2031	85	98	98	91	81	0	0.777	0.675	0.674	0.686	1.530	0.666	0.976	120	528	2058	3471	-0.364	900	1158	1399	2072	0
2	19	8	"YNL246W"	"YNL246W"	10960	16350	130	3461	2764	1813	53	61	39	99	96	0	2723	2252	1478	87	97	70	98	80	0	1.293	1.252	1.263	1.347	1.447	1.239	0.972	120	579	6044	4876	0.371	3408	2636	2711	2165	0
2	20	8	"YNL278W"	"YNL278W"	11130	16340	110	2892	3450	2755	53	69	100	100	93	0	2252	2565	2070	87	102	78	98	91	0	1.311	1.371	1.421	1.524	1.493	1.355	0.972	80	516	5004	5875	0.391	2839	2165	3397	2478	0
2	21	8	"YNL310C"	"YNL310C"	11350	16350	120	2065	1743	1125	50	63	87	92	85	0	1259	1116	731	81	95	74	87	78	0	1.711	1.636	1.614	1.907	1.765	1.600	0.969	120	684	3193	2728	0.774	2015	1178	1693	1035	0
2	1	9	"YOR042W"	"YOR042W"	7360	16540	120	564	875	779	52	55	17	100	97	0	408	571	475	90	91	21	87	85	0	1.610	1.711	1.717	1.921	1.846	1.681	0.964	120	612	830	1304	0.687	512	318	823	481	0
2	2	9	"CDC21"	"YOR074C"	7540	16540	120	519	850	759	53	55	16	99	98	0	591	1012	935	91	92	20	93	92	0	0.932	0.865	0.901	0.950	1.498	0.832	0.970	120	534	966	1718	-0.102	466	500	797	921	0
2	3	9	"VAM3"	"YOR106W"	7740	16540	120	2767	3102	2094	53	57	21	100	100	0	1222	1333	918	89	93	26	95	93	0	2.395	2.451	2.463	2.801	1.655	2.430	0.949	120	570	3847	4293	1.260	2714	1133	3049	1244	0
2	4	9	"YOR044W"	"YOR044W"	7960	16540	130	1191	1362	1035	53	60	55	99	91	0	1384	1661	1306	90	95	31	99	95	0	0.879	0.833	0.836	0.926	1.523	0.810	0.961	120	649	2432	2880	-0.185	1138	1294	1309	1571	0
2	5	9	"YOR076C"	"YOR076C"	8150	16540	120	716	1322	1337	52	59	56	95	91	0	1218	2476	2581	87	91	28	99	98	0	0.587	0.532	0.536	0.594	1.673	0.519	0.972	120	595	1795	3659	-0.768	664	1131	1270	2389	0
2	6	9	"YOR108W"	"YOR108W"	8360	16540	110	468	647	595	52	57	24	92	83	0	344	424	338	84	87	27	75	71	0	1.600	1.750	1.740	2.080	2.335	1.793	0.906	80	507	676	935	0.678	416	260	595	340	0
2	7	9	"DBP5"	"YOR046C"	8530	16550	110	1390	1691	1592	50	56	30	91	88	0	2599	3434	3202	68	77	66	90	86	0	0.529	0.488	0.487	0.526	2.019	0.480	0.948	80	561	3871	5007	-0.917	1340	2531	1641	3366	0
2	8	9	"YOR078W"	"YOR078W"	8750	16520	90	616	1423	2182	49	61	111	63	59	0	259	1017	1545	58	69	88	61	51	0	2.821	1.433	1.518	1.837	2.101	1.417	0.953	52	385	768	2333	1.496	567	201	1374	959	-100
2	9	9	"YOR110W"	"YOR110W"	8960	16540	110	832	1510	1459	50	53	19	97	97	0	745	1572	1615	74	77	32	97	93	0	1.165	0.975	0.997	1.079	1.478	0.931	0.976	80	544	1453	2958	0.221	782	671	1460	1498	0
2	10	9	"RAT1"	"YOR048C"	9150	16550	80	131	298	450	51	55	19	78	71	0	160	327	467	84	87	22	67	59	0	1.053	1.016	0.885	0.929	2.652	0.968	0.938	52	340	156	490	0.074	80	76	247	243	0
2	11	9	"YOR080W"	"YOR080W"	9350	16540	130	1436	2078	1839	51	56	28	100	96	0	2025	2909	2598	84	92	48	100	95	0	0.714	0.718	0.703	0.725	1.464	0.710	0.972	120	695	3326	4852	-0.487	1385	1941	2027	2825	0
2	12	9	"YOR112W"	"YOR112W"	9550	16550	120	1288	1999	1879	49	52	16	100	99	0	1068	1604	1476	83	87	32	95	91	0	1.258	1.282	1.257	1.339	1.584	1.282	0.972	120	583	2224	3471	0.331	1239	985	1950	1521	0
2	13	9	"PHO85"	"YPL031C"	9750	16540	130	962	1473	1229	49	52	15	100	100	0	667	887	732	83	85	19	92	87	0	1.563	1.771	1.817	2.086	1.761	1.737	0.969	120	588	1497	2228	0.645	913	584	1424	804	0
2	14	9	"YPL063W"	"YPL063W"	9940	16540	110	1029	1746	1528	50	60	53	98	87	0	1078	1379	1164	84	90	44	91	85	0	0.985	1.310	1.323	1.492	1.883	1.326	0.971	80	534	1973	2991	-0.022	979	994	1696	1295	0
2	15	9	"YPL095C"	"YPL095C"	10170	16530	120	1674	1986	1545	50	56	32	100	97	0	1622	2129	1613	82	94	104	90	86	0	1.055	0.946	0.943	0.986	1.433	0.952	0.974	120	563	3164	3983	0.077	1624	1540	1936	2047	0
2	16	9	"YPL033C"	"YPL033C"	10350	16540	120	910	1534	1450	49	53	15	100	97	0	1062	1880	1754	84	92	101	91	82	0	0.880	0.827	0.841	0.827	1.499	0.826	0.971	120	527	1839	3281	-0.184	861	978	1485	1796	0
2	17	9	"VPS28"	"YPL065W"	10550	16550	120	1695	2476	2094	51	56	20	100	100	0	2188	2584	2135	86	91	28	100	100	0	0.782	0.971	0.974	0.959	1.407	0.976	0.978	120	575	3746	4923	-0.355	1644	2102	2425	2498	0
2	18	9	"MSY1"	"YPL097W"	10760	16540	120	1840	3041	2875	53	57	20	100	100	0	1657	2928	2807	87	92	26	100	100	0	1.138	1.052	1.016	1.042	1.378	1.038	0.974	120	587	3357	5829	0.187	1787	1570	2988	2841	0
2	19	9	"YPL035C"	"YPL035C"	10960	16550	130	688	720	509	53	58	31	95	91	0	1068	1290	982	87	94	40	92	88	0	0.647	0.554	0.569	0.632	1.607	0.530	0.956	120	672	1616	1870	-0.627	635	981	667	1203	0
2	20	9	"YPL067C"	"YPL067C"	11170	16540	110	1007	897	558	52	63	91	81	78	0	560	523	317	88	102	112	75	67	0	2.023	1.943	1.991	2.000	1.363	1.823	0.732	80	558	1427	1280	1.017	955	472	845	435	0
2	21	9	"YPL099C"	"YPL099C"	11360	16540	130	322	600	580	49	52	17	95	90	0	364	647	627	81	87	82	76	65	0	0.965	0.973	0.979	1.155	1.952	0.943	0.972	120	703	556	1117	-0.052	273	283	551	566	0
2	1	10	"EGD1"	"YPL037C"	7360	16740	120	1054	988	591	52	54	14	100	98	0	636	591	340	88	90	20	86	84	0	1.828	1.861	1.866	2.063	2.069	1.849	0.925	120	671	1550	1439	0.871	1002	548	936	503	0
2	2	10	"BTS1"	"YPL069C"	7580	16740	130	2115	2235	1378	53	56	17	100	100	0	2605	2904	1902	90	93	21	100	100	0	0.820	0.775	0.776	0.829	1.450	0.753	0.967	120	609	4577	4996	-0.287	2062	2515	2182	2814	0
2	3	10	"YPL101W"	"YPL101W"	7760	16740	120	2797	3243	2492	51	55	16	100	100	0	1399	1818	1340	90	92	22	100	98	0	2.098	1.847	1.880	1.965	1.609	1.896	0.922	120	558	4055	4920	1.069	2746	1309	3192	1728	0
2	4	10	"RPS23B"	"YPR132W"	7970	16740	130	1028	1540	1392	52	57	54	98	93	0	1013	1921	1772	91	94	28	98	96	0	1.059	0.813	0.821	0.906	1.645	0.794	0.959	120	614	1898	3318	0.082	976	922	1488	1830	0
2	5	10	"KIM3"	"YPR164W"	8160	16740	120	897	2516	3036	52	58	57	100	94	0	622	1734	2047	89	91	29	100	94	0	1.585	1.498	1.505	1.572	1.604	1.496	0.971	120	564	1378	4109	0.665	845	533	2464	1645	0
2	6	10	"YPR196W"	"YPR196W"	8360	16740	120	209	504	524	52	60	87	63	49	0	385	923	998	81	85	40	90	86	0	0.516	0.537	0.525	0.552	2.022	0.524	0.961	120	635	461	1294	-0.953	157	304	452	842	0
2	7	10	"MSS18"	"YPR134W"	8580	16730	100	1141	1858	2042	52	73	157	80	68	0	529	891	861	74	85	83	76	67	0	2.393	2.211	2.151	2.281	2.157	2.351	0.938	80	437	1544	2623	1.259	1089	455	1806	817	0
2	8	10	"MRP2"	"YPR166C"	8750	16740	150	55	87	103	49	62	116	8	6	0	61	104	132	63	76	84	16	6	0	-3.000	0.927	0.571	0.632	2.511	0.760	0.731	156	743	4	79	Error	6	-2	38	41	-50
2	9	10	"SGE1"	"YPR198W"	8950	16740	150	55	107	140	48	53	27	25	17	0	62	110	136	67	72	31	23	16	0	-1.400	1.372	0.717	0.679	3.319	1.020	0.734	156	804	2	102	Error	7	-5	59	43	-50
2	10	10	"YPR136C"	"YPR136C"	9170	16740	110	510	650	574	47	49	13	96	87	0	759	1035	962	77	77	24	87	86	0	0.679	0.629	0.624	0.697	2.026	0.604	0.957	80	589	1145	1561	-0.559	463	682	603	958	0
2	11	10	"NUT2"	"YPR168W"	9370	16740	100	289	435	439	48	49	11	88	86	0	230	368	389	85	87	31	68	66	0	1.662	1.367	1.482	1.490	1.911	1.207	0.913	80	492	386	670	0.733	241	145	387	283	0
2	12	10	"ARR2"	"YPR200C"	9570	16730	90	102	100	35	49	50	11	82	76	0	172	158	65	81	85	29	78	69	0	0.582	0.662	0.562	0.514	1.771	0.570	0.566	52	367	144	128	-0.780	53	91	51	77	0
2	13	10	"MEP3"	"YPR138C"	9760	16740	140	1971	2898	2317	49	56	80	97	94	0	2092	2728	2058	81	86	48	98	97	0	0.956	1.076	1.025	1.037	1.443	1.102	0.966	156	758	3933	5496	-0.065	1922	2011	2849	2647	0
2	14	10	"YPR170C"	"YPR170C"	9990	16750	120	220	370	314	50	61	102	71	40	0	205	305	239	82	91	62	71	50	0	1.382	1.435	1.340	1.392	1.724	1.415	0.928	120	560	293	543	0.467	170	123	320	223	0
2	15	10	"YPR202W"	"YPR202W"	10160	16750	140	8943	13443	11550	49	62	100	100	100	0	4583	7286	6331	83	98	111	100	100	0	1.976	1.860	1.814	1.842	1.401	1.859	0.976	156	669	13394	20597	0.983	8894	4500	13394	7203	0
2	16	10	"IntYBR048W"	"IntYBR048W"	10370	16750	120	1045	1286	973	49	63	110	93	83	0	1704	1865	1275	83	99	122	91	85	0	0.614	0.694	0.672	0.723	1.499	0.715	0.933	120	544	2617	3019	-0.703	996	1621	1237	1782	0
2	17	10	"LSR1"	"LSR1"	10560	16750	120	873	1296	1113	49	54	18	100	99	0	530	673	532	85	88	23	84	81	0	1.852	2.121	2.126	2.491	2.001	2.152	0.932	120	527	1269	1835	0.889	824	445	1247	588	0
2	18	10	"YCLWTy5-1C"	"YCLWTy5-1C"	10760	16750	120	1112	1637	1370	53	58	21	99	98	0	1010	1249	1000	88	94	30	95	92	0	1.149	1.364	1.334	1.420	1.693	1.372	0.951	120	613	1981	2745	0.200	1059	922	1584	1161	0
2	19	10	"IntYCR097W-A2"	"IntYCR097W-A2"	10980	16750	110	157	213	165	51	56	22	81	70	0	235	365	276	84	91	36	82	72	0	0.702	0.577	0.508	0.547	2.556	0.526	0.764	80	527	257	443	-0.510	106	151	162	281	0
2	20	10	"IntYDL191W"	"IntYDL191W"	11160	16760	110	138	153	80	50	53	18	91	81	0	221	227	110	84	87	23	83	77	0	0.642	0.720	0.578	0.641	2.565	0.632	0.594	80	532	225	246	-0.639	88	137	103	143	0
2	21	10	"CEN4"	"CEN4"	11370	16750	120	112	122	62	50	53	18	83	66	0	339	342	212	81	85	24	80	78	0	0.240	0.276	0.228	0.291	2.732	0.199	0.465	120	646	320	333	-2.057	62	258	72	261	0
2	1	11	"YDRWdelta31"	"YDRWdelta31"	7380	16940	100	154	172	100	53	56	17	85	78	0	254	264	164	88	91	20	75	72	0	0.608	0.676	0.564	0.620	2.692	0.578	0.668	80	487	267	295	-0.717	101	166	119	176	0
2	2	11	"YELCtau1"	"YELCtau1"	7570	16940	120	473	583	425	54	59	22	96	90	0	830	1028	780	90	94	23	93	89	0	0.566	0.564	0.575	0.676	2.219	0.534	0.877	120	592	1159	1467	-0.821	419	740	529	938	0
2	3	11	"YER039C-A"	"YER039C-A"	7780	16950	130	634	902	737	52	56	19	98	96	0	440	574	443	88	93	32	83	80	0	1.653	1.749	1.775	1.938	1.911	1.742	0.925	120	599	934	1336	0.725	582	352	850	486	0
2	4	11	"YFLWtau1"	"YFLWtau1"	7960	16940	130	903	974	573	52	55	17	100	99	0	2797	2737	1823	91	95	33	100	100	0	0.314	0.348	0.346	0.381	1.711	0.321	0.899	120	647	3557	3568	-1.669	851	2706	922	2646	0
2	5	11	"YFRCdelta9"	"YFRCdelta9"	8180	16940	110	706	578	328	52	56	17	97	93	0	800	651	405	90	99	132	72	66	0	0.921	0.938	0.885	1.100	2.054	0.867	0.836	80	536	1364	1087	-0.119	654	710	526	561	0
2	6	11	"YGLWtau2"	"YGLWtau2"	8380	16950	120	239	293	207	50	52	14	93	85	0	258	319	247	86	94	127	54	37	0	1.099	1.043	1.033	1.175	2.151	0.611	0.484	120	566	361	476	0.136	189	172	243	233	0
2	7	11	"iYAR061W"	"iYAR061W"	8560	16940	130	499	857	781	50	64	135	81	63	0	691	1133	1033	80	86	64	90	81	0	0.735	0.766	0.764	0.839	1.876	0.750	0.930	120	581	1060	1860	-0.444	449	611	807	1053	0
2	8	11	"iYAR068W"	"iYAR068W"	8750	16940	150	55	356	1573	48	52	19	33	27	0	59	228	667	71	73	29	23	20	0	-0.583	1.962	0.674	0.694	4.848	2.429	0.893	156	669	-5	465	Error	7	-12	308	157	-50
2	9	11	"iYBL111C"	"iYBL111C"	8960	16950	130	8354	9267	7733	49	54	28	100	100	0	3781	5013	4379	74	77	36	100	100	0	2.240	1.866	1.806	1.981	1.825	1.860	0.926	120	586	12012	14157	1.164	8305	3707	9218	4939	0
2	10	11	"iYBL098W"	"iYBL098W"	9140	16960	80	1546	1591	1080	48	52	29	100	98	0	1131	1078	799	64	71	39	86	84	0	1.404	1.522	1.463	1.939	2.178	1.470	0.895	52	312	2565	2557	0.489	1498	1067	1543	1014	0
2	11	11	"iYBL092W"	"iYBL092W"	9350	16940	130	990	1092	875	47	49	12	100	100	0	1150	1305	1121	76	79	64	83	75	0	0.878	0.850	0.875	1.241	2.572	0.810	0.950	120	737	2017	2274	-0.188	943	1074	1045	1229	0
2	12	11	"iYBL089W"	"iYBL089W"	9570	16930	130	1001	889	497	49	50	12	100	100	0	1064	953	579	82	87	64	90	85	0	0.969	0.964	0.952	1.142	1.860	0.933	0.919	120	694	1934	1711	-0.045	952	982	840	871	0
2	13	11	"iYBL071C"	"iYBL071C"	9770	16950	120	188	320	295	49	50	12	94	88	0	212	381	365	80	81	18	80	75	0	1.053	0.900	0.870	0.894	2.183	0.834	0.934	120	579	271	572	0.075	139	132	271	301	0
2	14	11	"iYBL065W"	"iYBL065W"	9980	16940	100	267	248	137	48	49	10	93	88	0	246	229	122	78	81	24	75	72	0	1.304	1.325	1.216	1.315	1.802	1.240	0.870	80	434	387	351	0.382	219	168	200	151	0
2	15	11	"iYBL060W"	"iYBL060W"	10150	16950	120	295	575	566	48	52	22	95	86	0	247	423	374	79	84	26	77	70	0	1.470	1.532	1.526	1.619	2.078	1.541	0.922	120	545	415	871	0.556	247	168	527	344	0
2	16	11	"iYBL042C"	"iYBL042C"	10370	16940	130	1037	1292	925	48	52	20	100	100	0	463	527	304	79	82	21	90	88	0	2.576	2.777	2.537	3.020	2.030	3.037	0.845	120	625	1373	1692	1.365	989	384	1244	448	0
2	17	11	"iYBL038W"	"iYBL038W"	10570	16950	140	597	833	758	48	51	15	99	94	0	551	736	651	80	85	31	83	79	0	1.166	1.197	1.244	1.464	2.049	1.184	0.910	156	679	1020	1441	0.221	549	471	785	656	0
2	18	11	"iYBL034C"	"iYBL034C"	10770	16950	120	345	418	335	51	55	22	87	81	0	228	274	194	83	88	29	72	68	0	2.028	1.921	1.940	1.941	2.417	1.871	0.861	120	525	439	558	1.020	294	145	367	191	0
2	19	11	"iYBR265W"	"iYBR265W"	10970	16950	130	528	510	340	51	56	22	93	85	0	630	669	460	83	87	22	85	82	0	0.872	0.783	0.750	0.827	2.068	0.752	0.893	120	617	1024	1045	-0.198	477	547	459	586	0
2	20	11	"iYBR270C"	"iYBR270C"	11160	16950	120	669	838	658	50	53	17	99	99	0	648	857	701	81	84	20	95	92	0	1.092	1.015	1.059	1.167	1.880	0.973	0.933	120	560	1186	1564	0.127	619	567	788	776	0
2	21	11	"iYBR274W"	"iYBR274W"	11380	16950	120	215	251	153	49	53	17	95	90	0	681	780	570	81	84	20	91	88	0	0.277	0.289	0.286	0.313	2.072	0.266	0.887	120	629	766	901	-1.854	166	600	202	699	0
2	1	12	"iYBR291C"	"iYBR291C"	7390	17140	110	249	308	189	53	62	42	90	75	0	377	487	320	93	106	68	85	70	0	0.690	0.647	0.638	0.695	1.745	0.578	0.884	80	547	480	649	-0.535	196	284	255	394	0
2	2	12	"iYBR294W"	"iYBR294W"	7570	17150	120	1022	1023	654	51	55	19	100	100	0	570	581	362	91	95	25	90	87	0	2.027	1.984	1.951	2.115	1.748	1.950	0.930	120	516	1450	1462	1.019	971	479	972	490	0
2	3	12	"iYBR297W"	"iYBR297W"	7770	17140	130	555	648	496	52	55	17	100	99	0	986	1402	1209	87	92	32	99	96	0	0.560	0.453	0.449	0.556	1.872	0.415	0.914	120	630	1402	1911	-0.838	503	899	596	1315	0
2	4	12	"iYCL061C"	"iYCL061C"	7980	17150	120	2597	2698	1964	51	55	16	100	100	0	1294	1278	915	88	91	31	96	94	0	2.111	2.224	2.150	2.396	1.740	2.222	0.954	120	563	3752	3837	1.078	2546	1206	2647	1190	0
2	5	12	"iYCL055W-0"	"iYCL055W-0"	8160	17140	120	482	520	324	51	60	67	89	77	0	876	958	680	89	100	101	86	75	0	0.548	0.540	0.534	0.616	1.835	0.496	0.868	120	553	1218	1338	-0.869	431	787	469	869	0
2	6	12	"iYCL051W"	"iYCL051W"	8350	17150	130	458	533	391	50	58	63	90	72	0	937	1638	1447	88	103	152	95	81	0	0.481	0.312	0.296	0.341	1.710	0.281	0.897	120	625	1257	2033	-1.057	408	849	483	1550	0
2	7	12	"iYCL029C"	"iYCL029C"	8560	17140	130	696	731	480	49	51	14	98	95	0	778	778	532	84	87	22	89	85	0	0.932	0.983	1.006	1.122	1.747	0.882	0.832	120	611	1341	1376	-0.101	647	694	682	694	0
2	8	12	"iYCL025C"	"iYCL025C"	8750	17150	120	1196	1091	608	47	48	12	100	100	0	675	616	329	72	73	26	91	88	0	1.905	1.919	1.935	2.157	1.794	1.932	0.937	120	546	1752	1588	0.930	1149	603	1044	544	0
2	9	12	"iYCRCdelta6-0"	"iYCRCdelta6-0"	8950	17140	150	49	74	78	47	51	20	17	12	0	53	75	100	62	68	34	10	7	0	-0.222	2.077	0.612	0.642	3.531	0.261	0.166	156	711	-7	40	Error	2	-9	27	13	-50
2	10	12	"iYDL043C"	"iYDL043C"	9150	17140	130	321	318	199	47	51	19	93	87	0	560	614	448	62	66	26	88	82	0	0.550	0.491	0.481	0.601	2.090	0.395	0.753	120	636	772	823	-0.862	274	498	271	552	0
2	11	12	"iYDL037C-0"	"iYDL037C-0"	9370	17140	100	168	408	491	49	53	23	61	56	0	106	199	210	75	81	88	37	27	0	3.839	2.895	2.282	1.612	3.656	2.356	0.739	80	462	150	483	1.941	119	31	359	124	0
2	12	12	"iYDL032W"	"iYDL032W"	9540	17140	130	397	381	243	49	52	16	92	87	0	236	257	160	83	89	73	62	51	0	2.275	1.908	1.887	2.076	2.514	1.542	0.539	120	645	501	506	1.186	348	153	332	174	0
2	13	12	"iYDL014W"	"iYDL014W"	9740	17140	120	807	869	674	49	52	21	97	93	0	634	752	597	80	84	31	83	78	0	1.368	1.220	1.232	1.508	2.305	1.176	0.923	120	594	1312	1492	0.452	758	554	820	672	0
2	14	12	"iYDL008W"	"iYDL008W"	9960	17150	120	162	240	175	48	50	17	85	81	0	287	381	289	78	81	19	82	76	0	0.545	0.634	0.636	0.695	2.312	0.603	0.896	120	610	323	495	-0.874	114	209	192	303	0
2	15	12	"iYDLWtau1"	"iYDLWtau1"	10150	17150	120	517	601	423	48	49	11	98	95	0	554	641	484	78	80	16	92	88	0	0.985	0.982	1.029	1.168	1.901	0.929	0.944	120	528	945	1116	-0.021	469	476	553	563	0
2	16	12	"iYDR008C"	"iYDR008C"	10350	17150	130	771	924	701	48	50	12	100	100	0	595	722	553	78	81	25	94	85	0	1.398	1.360	1.419	1.612	1.833	1.312	0.936	120	662	1240	1520	0.484	723	517	876	644	0
2	17	12	"iYDR013W"	"iYDR013W"	10570	17160	130	179	229	171	48	51	18	90	81	0	374	402	287	78	88	46	75	69	0	0.443	0.559	0.491	0.614	2.362	0.543	0.802	120	607	427	505	-1.176	131	296	181	324	0
2	18	12	"iYDR016C"	"iYDR016C"	10770	17150	140	553	702	563	49	54	24	97	94	0	1186	1695	1489	82	92	48	96	91	0	0.457	0.405	0.415	0.437	1.755	0.383	0.951	156	632	1608	2266	-1.131	504	1104	653	1613	0
2	19	12	"iYDR032C-0"	"iYDR032C-0"	10940	17150	130	1137	1160	815	51	66	148	85	78	0	468	566	383	86	100	169	68	53	0	2.843	2.310	2.281	2.585	1.940	2.014	0.843	120	541	1468	1589	1.507	1086	382	1109	480	0
2	20	12	"iYDR034C"	"iYDR034C"	11150	17150	140	1122	1790	1512	52	64	132	88	77	0	758	1238	1082	85	98	151	73	66	0	1.590	1.507	1.528	1.767	1.782	1.447	0.938	156	672	1743	2891	0.669	1070	673	1738	1153	0
2	21	12	"iYDR034C-A"	"iYDR034C-A"	11360	17150	130	1840	2128	1599	50	53	17	100	100	0	2043	2422	1900	83	87	23	100	100	0	0.913	0.888	0.865	0.939	1.438	0.865	0.957	120	694	3750	4417	-0.131	1790	1960	2078	2339	0
2	1	13	"iYDR335W"	"iYDR335W"	7390	17350	130	169	350	393	53	58	32	77	63	0	358	725	842	93	102	54	77	68	0	0.438	0.470	0.462	0.516	1.786	0.460	0.971	120	625	381	929	-1.192	116	265	297	632	0
2	2	13	"iYDR339C"	"iYDR339C"	7550	17330	150	74	153	191	52	61	132	17	13	0	117	196	213	90	105	217	14	11	0	0.815	0.953	0.832	0.790	2.345	0.663	0.867	156	646	49	207	-0.295	22	27	101	106	-50
2	3	13	"iYDR342C-1"	"iYDR342C-1"	7760	17350	130	616	624	322	52	55	16	100	98	0	616	582	295	88	91	24	93	89	0	1.068	1.158	1.119	1.241	1.487	1.130	0.955	120	660	1092	1066	0.095	564	528	572	494	0
2	4	13	"iYDR354W"	"iYDR354W"	7980	17340	100	322	354	232	53	59	27	88	85	0	228	213	117	89	92	23	73	63	0	1.935	2.427	2.236	2.403	2.089	2.222	0.857	80	481	408	425	0.953	269	139	301	124	0
2	5	13	"iYDR360W"	"iYDR360W"	8170	17330	90	1034	1287	1089	52	67	58	86	82	0	307	372	283	86	90	27	76	69	0	4.443	4.318	4.165	4.992	1.644	4.050	0.929	52	400	1203	1521	2.152	982	221	1235	286	0
2	6	13	"itK(CUU)D1"	"itK(CUU)D1"	8370	17340	110	450	557	468	52	58	35	83	75	0	289	431	356	82	85	29	68	65	0	1.923	1.447	1.464	1.706	1.919	1.356	0.950	80	553	605	854	0.943	398	207	505	349	0
2	7	13	"iYDR379W"	"iYDR379W"	8570	17340	120	1276	1586	1307	50	52	14	100	100	0	623	831	689	84	86	19	90	86	0	2.275	2.056	2.129	2.515	1.865	1.987	0.959	120	571	1765	2283	1.186	1226	539	1536	747	0
2	8	13	"iYDR383C"	"iYDR383C"	8750	17350	100	175	392	441	48	51	16	92	88	0	181	407	458	79	81	26	66	60	0	1.245	1.049	1.073	1.361	2.564	0.947	0.944	80	451	229	672	0.316	127	102	344	328	0
2	9	13	"iYDR387C"	"iYDR387C"	8970	17340	110	312	575	550	48	52	23	91	82	0	213	400	383	68	71	28	71	62	0	1.821	1.587	1.804	2.355	2.336	1.498	0.952	80	486	409	859	0.864	264	145	527	332	0
2	10	13	"iYDR404C"	"iYDR404C"	9150	17340	150	50	138	460	50	57	35	14	8	0	50	69	101	68	76	44	5	4	0	0.000	88.000	0.484	0.571	4.031	4.514	0.760	156	865	-18	89	Error	0	-18	88	1	-50
2	11	13	"iYDR408C"	"iYDR408C"	9400	17340	90	410	912	974	53	59	27	94	92	0	238	448	434	80	83	30	88	76	0	2.259	2.334	2.203	2.153	1.553	2.312	0.963	52	398	515	1227	1.176	357	158	859	368	0
2	12	13	"iYDR413C"	"iYDR413C"	9570	17350	110	171	240	168	52	57	26	87	76	0	186	254	183	81	88	36	73	61	0	1.133	1.087	1.081	1.162	1.686	0.983	0.890	80	517	224	361	0.181	119	105	188	173	0
2	13	13	"itS(UGA)E-0"	"itS(UGA)E-0"	9780	17350	130	500	1152	1234	50	54	21	98	95	0	350	865	909	81	85	31	85	81	0	1.673	1.406	1.392	1.734	2.214	1.372	0.974	120	663	719	1886	0.742	450	269	1102	784	0
2	14	13	"iYER068W"	"iYER068W"	9970	17340	110	870	895	656	48	51	14	98	93	0	541	660	484	80	82	20	83	83	0	1.783	1.460	1.452	1.601	1.449	1.412	0.965	80	486	1283	1427	0.834	822	461	847	580	0
2	15	13	"iYER072W"	"iYER072W"	10160	17340	120	460	581	491	47	49	11	99	98	0	438	529	414	79	82	25	81	77	0	1.150	1.187	1.176	1.287	1.736	1.191	0.968	120	592	772	984	0.202	413	359	534	450	0
2	16	13	"iYER087W"	"iYER087W"	10380	17350	120	581	959	993	49	50	13	100	100	0	888	1458	1413	80	83	26	99	97	0	0.658	0.660	0.645	0.653	1.438	0.682	0.969	120	545	1340	2288	-0.603	532	808	910	1378	0
2	17	13	"iYER090W"	"iYER090W"	10560	17350	120	888	836	496	51	54	17	97	95	0	1894	1778	1183	81	84	23	97	95	0	0.462	0.463	0.468	0.523	1.493	0.441	0.965	120	545	2650	2482	-1.115	837	1813	785	1697	0
2	18	13	"iYER093C"	"iYER093C"	10770	17340	110	563	565	365	50	54	19	91	87	0	367	380	234	83	85	23	81	78	0	1.806	1.734	1.743	1.756	1.494	1.655	0.948	80	518	797	812	0.853	513	284	515	297	0
2	19	13	"iYER106W"	"iYER106W"	10970	17350	120	750	809	590	51	61	122	83	70	0	855	967	748	86	98	143	78	67	0	0.909	0.860	0.847	0.944	1.594	0.824	0.976	120	566	1468	1639	-0.138	699	769	758	881	0
2	20	13	"iYER110C"	"iYER110C"	11160	17340	130	378	822	922	52	56	21	90	85	0	468	895	1001	85	90	25	82	75	0	0.851	0.951	0.962	1.186	1.987	0.931	0.978	120	578	709	1580	-0.232	326	383	770	810	0
2	21	13	"iYER114C"	"iYER114C"	11360	17350	130	311	584	640	51	56	23	94	88	0	210	384	382	83	87	22	80	72	0	2.047	1.771	1.758	1.881	1.578	1.718	0.960	120	717	387	834	1.034	260	127	533	301	0
2	1	14	"iYER131W"	"iYER131W"	7360	17540	130	1088	1047	690	53	56	19	99	97	0	1609	1593	1080	90	94	29	98	94	0	0.681	0.661	0.664	0.726	1.525	0.648	0.964	120	683	2554	2497	-0.553	1035	1519	994	1503	0
2	2	14	"iYERCdelta14"	"iYERCdelta14"	7560	17540	120	816	1015	889	54	65	143	79	66	0	454	502	363	90	108	235	58	35	0	2.093	2.333	2.244	2.431	1.835	1.964	0.678	120	554	1126	1373	1.066	762	364	961	412	0
2	3	14	"itK(CUU)E2"	"itK(CUU)E2"	7760	17540	120	384	539	425	53	60	38	90	83	0	502	649	521	88	93	39	80	73	0	0.800	0.866	0.888	1.025	1.854	0.834	0.952	120	560	745	1047	-0.323	331	414	486	561	0
2	4	14	"iYGL186C"	"iYGL186C"	7970	17540	120	674	828	657	53	57	19	96	94	0	358	406	287	89	91	21	81	76	0	2.309	2.445	2.433	2.692	1.641	2.405	0.943	120	590	890	1092	1.207	621	269	775	317	0
2	5	14	"iYGL182C"	"iYGL182C"	8170	17540	120	791	1240	1104	54	63	48	99	96	0	321	400	289	83	86	25	89	83	0	3.097	3.741	3.822	3.790	1.609	3.882	0.942	120	619	975	1503	1.631	737	238	1186	317	0
2	6	14	"iYGL179C-1"	"iYGL179C-1"	8370	17560	100	304	497	491	52	57	28	85	73	0	189	309	267	78	81	28	70	65	0	2.270	1.926	1.832	1.679	2.582	1.888	0.923	80	451	363	676	1.183	252	111	445	231	0
2	7	14	"iYGL163C-1"	"iYGL163C-1"	8560	17540	120	837	1127	1018	50	53	17	100	98	0	344	484	404	79	82	27	82	75	0	2.970	2.659	2.698	3.153	2.016	2.614	0.948	120	580	1052	1482	1.570	787	265	1077	405	0
2	8	14	"iYGL159W"	"iYGL159W"	8760	17540	120	427	612	521	50	52	15	100	96	0	408	592	509	79	82	22	87	85	0	1.146	1.096	1.118	1.325	1.853	1.058	0.949	120	564	706	1075	0.196	377	329	562	513	0
2	9	14	"iYGL157W"	"iYGL157W"	8960	17540	120	303	511	680	52	59	40	65	60	0	136	284	311	78	86	45	51	45	0	4.328	2.228	1.750	1.628	3.117	2.286	0.923	120	651	309	665	2.114	251	58	459	206	0
2	10	14	"iYGL139W"	"iYGL139W"	9190	17550	110	250	464	540	51	59	43	83	75	0	268	504	500	72	82	49	77	73	0	1.015	0.956	0.850	0.958	1.921	1.029	0.889	80	577	395	845	0.022	199	196	413	432	0
2	11	14	"iYGL135W"	"iYGL135W"	9400	17540	80	589	1110	1025	49	53	31	98	96	0	393	773	679	73	76	29	88	86	0	1.688	1.516	1.482	1.689	1.985	1.518	0.941	52	304	860	1761	0.755	540	320	1061	700	0
2	12	14	"iYGL130W"	"iYGL130W"	9560	17540	130	572	740	579	50	54	20	98	95	0	647	799	630	80	84	24	85	84	0	0.921	0.960	0.963	1.238	2.195	0.936	0.956	120	608	1089	1409	-0.119	522	567	690	719	0
2	13	14	"iYGL114W"	"iYGL114W"	9760	17540	130	311	366	266	51	54	18	90	85	0	325	448	356	82	85	22	78	75	0	1.070	0.861	0.850	0.970	1.814	0.792	0.940	120	647	503	681	0.098	260	243	315	366	0
2	14	14	"iYGL110C"	"iYGL110C"	9980	17540	100	143	151	87	49	52	16	82	67	0	151	202	139	83	86	28	63	55	0	1.382	0.857	0.774	0.925	2.784	0.690	0.821	80	493	162	221	0.467	94	68	102	119	0
2	15	14	"iYGL105W"	"iYGL105W"	10180	17550	120	206	290	239	48	49	12	95	93	0	346	514	506	77	79	23	85	83	0	0.587	0.554	0.607	0.693	1.959	0.475	0.856	120	548	427	679	-0.768	158	269	242	437	0
2	16	14	"iYGR177C"	"iYGR177C"	10360	17540	130	552	586	383	50	52	18	99	97	0	1012	943	661	81	85	25	93	87	0	0.539	0.622	0.632	0.800	2.088	0.596	0.936	120	583	1433	1398	-0.891	502	931	536	862	0
2	17	14	"itL(CAA)G3"	"itL(CAA)G3"	10570	17550	120	770	1121	872	52	56	21	100	98	0	822	1288	1018	82	86	26	94	90	0	0.970	0.886	0.910	1.051	1.700	0.861	0.953	120	578	1458	2275	-0.044	718	740	1069	1206	0
2	18	14	"iYGR185C"	"iYGR185C"	10770	17550	110	506	504	336	50	53	15	97	95	0	378	349	225	80	83	22	78	73	0	1.530	1.688	1.698	2.048	2.291	1.587	0.918	80	534	754	723	0.614	456	298	454	269	0
2	19	14	"iYGR199W"	"iYGR199W"	10970	17550	130	270	292	192	49	52	19	95	87	0	485	677	545	84	86	23	90	85	0	0.551	0.410	0.400	0.531	2.386	0.359	0.868	120	617	622	836	-0.860	221	401	243	593	0
2	20	14	"iYGR203W"	"iYGR203W"	11170	17550	120	356	411	297	49	54	24	95	89	0	290	364	255	82	85	24	82	76	0	1.476	1.284	1.267	1.546	2.022	1.223	0.928	120	578	515	644	0.562	307	208	362	282	0
2	21	14	"iYGR207C"	"iYGR207C"	11360	17550	110	256	283	183	50	55	22	87	78	0	329	351	250	83	86	23	73	70	0	0.837	0.869	0.877	1.017	2.122	0.784	0.909	80	534	452	501	-0.256	206	246	233	268	0
2	1	15	"iYGR221C"	"iYGR221C"	7370	17740	130	647	703	479	53	59	22	95	92	0	647	757	542	86	91	27	90	88	0	1.059	0.969	0.968	1.137	2.166	0.926	0.918	120	695	1155	1321	0.082	594	561	650	671	0
2	2	15	"iYGR224W"	"iYGR224W"	7570	17740	120	882	931	570	54	67	58	94	87	0	635	632	397	89	100	61	83	79	0	1.516	1.615	1.635	1.895	1.986	1.570	0.908	120	585	1374	1420	0.601	828	546	877	543	0
2	3	15	"iYGR230W"	"iYGR230W"	7790	17740	130	259	504	482	52	66	60	84	70	0	233	432	411	88	99	63	68	54	0	1.428	1.314	1.313	1.542	2.065	1.175	0.924	120	615	352	796	0.514	207	145	452	344	0
2	4	15	"iYGR247W"	"iYGR247W"	7970	17740	120	474	511	321	53	56	24	93	89	0	441	485	319	87	90	26	82	77	0	1.189	1.151	1.168	1.429	2.198	1.092	0.904	120	532	775	856	0.250	421	354	458	398	0
2	5	15	"iYGR250C-0"	"iYGR250C-0"	8170	17740	130	652	1169	1260	53	56	17	100	98	0	470	786	789	86	88	20	87	84	0	1.560	1.594	1.529	1.783	2.336	1.638	0.917	120	613	983	1816	0.641	599	384	1116	700	0
2	6	15	"iYGR253C-0"	"iYGR253C-0"	8370	17740	120	742	790	523	54	62	52	89	86	0	469	506	337	86	93	45	80	75	0	1.796	1.752	1.767	1.979	1.979	1.699	0.892	120	584	1071	1156	0.845	688	383	736	420	0
2	7	15	"iYHR186C"	"iYHR186C"	8570	17750	130	941	1586	1491	51	55	18	100	98	0	835	1239	1120	82	85	29	91	88	0	1.182	1.327	1.298	1.547	2.076	1.350	0.905	120	624	1643	2692	0.241	890	753	1535	1157	0
2	8	15	"iYHR191C"	"iYHR191C"	8770	17740	120	628	636	391	51	55	17	98	95	0	695	723	473	79	83	29	92	88	0	0.937	0.908	0.937	1.068	2.152	0.859	0.904	120	614	1193	1229	-0.094	577	616	585	644	0
2	9	15	"iYHR196W"	"iYHR196W"	8990	17740	110	146	178	121	53	57	21	77	66	0	178	231	166	79	84	31	67	58	0	0.939	0.822	0.688	0.721	2.863	0.739	0.763	80	521	192	277	-0.090	93	99	125	152	0
2	10	15	"iYHRCdelta16-0"	"iYHRCdelta16-0"	9170	17750	130	664	3093	5488	53	65	90	82	71	0	486	1711	2594	78	91	126	65	58	0	1.498	1.862	1.772	2.104	2.504	2.148	0.884	120	577	1019	4673	0.583	611	408	3040	1633	0
2	11	15	"iYIL174W-1"	"iYIL174W-1"	9370	17750	110	1047	1500	1503	52	55	27	93	86	0	624	945	903	77	80	27	75	72	0	1.819	1.668	1.719	2.230	2.803	1.682	0.921	80	508	1542	2316	0.863	995	547	1448	868	0
2	12	15	"iYIL170W-1"	"iYIL170W-1"	9560	17740	120	1191	1635	1483	50	53	16	100	99	0	1150	1267	1058	84	86	21	90	88	0	1.070	1.340	1.361	1.679	2.270	1.390	0.926	120	556	2207	2768	0.098	1141	1066	1585	1183	0
2	13	15	"iYIL153W"	"iYIL153W"	9770	17740	130	323	360	221	50	53	17	94	92	0	610	662	460	84	86	21	88	84	0	0.519	0.536	0.543	0.714	2.495	0.494	0.894	120	592	799	888	-0.946	273	526	310	578	0
2	14	15	"iYIL149C"	"iYIL149C"	9970	17740	120	728	1024	830	49	52	15	100	100	0	555	746	619	81	83	18	93	91	0	1.432	1.466	1.538	1.725	2.005	1.414	0.942	120	567	1153	1640	0.519	679	474	975	665	0
2	15	15	"iYIL145C"	"iYIL145C"	10180	17740	120	931	1435	1334	48	50	13	100	100	0	337	545	473	78	80	24	90	85	0	3.409	2.970	2.937	3.400	1.928	2.947	0.941	120	501	1142	1854	1.769	883	259	1387	467	0
2	16	15	"iYIL129C"	"iYIL129C"	10360	17740	120	951	1189	1056	49	50	14	100	100	0	234	341	253	80	81	17	85	78	0	5.857	4.368	4.448	4.747	1.959	4.504	0.866	120	505	1056	1401	2.550	902	154	1140	261	0
2	17	15	"iYIL125W"	"iYIL125W"	10560	17740	120	319	374	275	48	50	12	99	95	0	365	595	527	79	82	38	83	77	0	0.948	0.632	0.642	0.815	2.167	0.551	0.880	120	515	557	842	-0.078	271	286	326	516	0
2	18	15	"iYIL121W"	"iYIL121W"	10760	17750	130	409	545	458	49	51	13	97	91	0	565	809	734	81	97	183	71	60	0	0.744	0.681	0.659	0.791	1.943	0.578	0.802	120	535	844	1224	-0.427	360	484	496	728	0
2	19	15	"itR(ACG)J"	"itR(ACG)J"	10950	17750	140	480	593	454	48	51	13	98	94	0	1017	1968	1859	81	87	111	87	80	0	0.462	0.289	0.291	0.355	1.967	0.249	0.885	156	585	1368	2432	-1.115	432	936	545	1887	0
2	20	15	"iYJL098W"	"iYJL098W"	11160	17750	120	187	222	136	48	50	14	92	89	0	285	330	224	79	80	17	80	76	0	0.675	0.693	0.681	0.809	2.202	0.627	0.867	120	508	345	425	-0.568	139	206	174	251	0
2	21	15	"iYJL093C"	"iYJL093C"	11360	17750	120	366	641	624	49	52	17	97	93	0	176	246	201	81	86	78	53	34	0	3.337	3.588	3.387	4.005	2.050	3.433	0.873	120	630	412	757	1.738	317	95	592	165	0
2	1	16	"iYJL074C"	"iYJL074C"	7370	17940	120	511	695	565	53	59	25	96	88	0	312	429	323	84	87	22	84	79	0	2.009	1.861	1.890	2.012	2.331	1.835	0.892	120	543	686	987	1.006	458	228	642	345	0
2	2	16	"iYJL070C"	"iYJL070C"	7570	17940	130	207	264	197	53	59	25	88	77	0	188	225	158	89	93	26	69	61	0	1.556	1.551	1.454	1.652	2.858	1.388	0.788	120	561	253	347	0.637	154	99	211	136	0
2	3	16	"iYJL064W"	"iYJL064W"	7770	17940	120	180	249	200	52	60	31	86	70	0	193	253	196	89	95	34	68	58	0	1.231	1.201	1.094	1.114	2.237	1.077	0.799	120	518	232	361	0.300	128	104	197	164	0
2	4	16	"iSNR60"	"iSNR60"	7970	17930	110	240	340	250	54	58	27	86	80	0	326	385	280	89	92	30	76	73	0	0.785	0.966	0.909	0.979	2.222	0.933	0.837	80	461	423	582	-0.350	186	237	286	296	0
2	5	16	"iYJLCdelta5"	"iYJLCdelta5"	8160	17940	120	481	616	476	52	55	18	95	95	0	612	754	631	85	88	20	88	85	0	0.814	0.843	0.848	1.044	2.110	0.756	0.824	120	479	956	1233	-0.297	429	527	564	669	0
2	6	16	"iYJL043W"	"iYJL043W"	8340	17950	110	496	558	400	54	63	57	88	75	0	442	479	351	86	93	46	77	68	0	1.242	1.282	1.184	1.485	2.467	1.231	0.868	80	476	798	897	0.312	442	356	504	393	0
2	7	16	"iYJL029C"	"iYJL029C"	8570	17930	110	252	238	117	55	61	27	86	78	0	223	216	113	87	92	30	77	63	0	1.449	1.419	1.282	1.372	2.035	1.205	0.684	80	517	333	312	0.535	197	136	183	129	0
2	8	16	"iYJL026W"	"iYJL026W"	8770	17950	120	205	268	215	52	57	22	90	75	0	192	252	195	82	84	27	76	65	0	1.391	1.271	1.218	1.270	2.603	1.183	0.802	120	526	263	386	0.476	153	110	216	170	0
2	9	16	"iYJL022W"	"iYJL022W"	8980	17950	120	532	700	528	54	107	228	71	50	0	884	1046	790	82	153	333	73	56	0	0.596	0.670	0.649	0.692	1.748	0.681	0.930	120	473	1280	1610	-0.747	478	802	646	964	0
2	10	16	"iYKL121W"	"iYKL121W"	9160	17940	150	91	325	506	53	98	213	26	16	0	127	381	592	84	144	310	22	14	0	0.884	0.916	0.892	0.823	2.967	0.761	0.849	156	547	81	569	-0.178	38	43	272	297	-50
2	11	16	"iYKL117W"	"iYKL117W"	9300	17940	150	275	440	384	52	56	19	92	85	0	693	1082	1082	84	87	24	82	80	0	0.366	0.389	0.369	0.521	2.797	0.349	0.857	156	543	832	1386	-1.449	223	609	388	998	0
2	12	16	"iYKL111C"	"iYKL111C"	9500	17940	150	354	397	297	52	56	19	93	87	0	482	597	487	86	90	25	87	84	0	0.763	0.675	0.660	0.758	1.958	0.620	0.858	156	567	698	856	-0.391	302	396	345	511	0
2	13	16	"iYKL097W-A-0"	"iYKL097W-A-0"	9700	17940	150	251	509	461	51	55	19	93	89	0	173	306	251	87	90	25	71	62	0	2.326	2.091	2.000	2.179	2.256	1.978	0.845	156	603	286	677	1.218	200	86	458	219	0
2	14	16	"iYKL094W"	"iYKL094W"	9900	17940	150	789	954	783	49	52	14	98	97	0	775	1150	940	86	87	19	95	92	0	1.074	0.851	0.824	0.911	1.835	0.835	0.930	156	584	1429	1969	0.103	740	689	905	1064	0
2	15	16	"iYKL090W"	"iYKL090W"	10100	17940	150	225	324	270	48	50	13	85	80	0	155	259	202	83	85	18	69	62	0	2.458	1.568	1.509	1.585	2.591	1.426	0.877	156	542	249	452	1.298	177	72	276	176	0
2	16	16	"iYKL072W"	"iYKL072W"	10300	17940	150	100	154	129	49	50	12	74	61	0	139	215	183	82	83	18	62	54	0	0.895	0.789	0.710	0.751	2.803	0.707	0.822	156	502	108	238	-0.160	51	57	105	133	0
2	17	16	"iYKL071W"	"iYKL071W"	10500	17940	150	341	557	522	50	52	13	87	81	0	310	478	435	81	84	37	66	58	0	1.271	1.277	1.243	1.352	2.111	1.238	0.889	156	554	520	904	0.346	291	229	507	397	0
2	18	16	"itV(AAC)K1-1"	"itV(AAC)K1-1"	10690	17940	150	836	933	669	49	52	20	97	94	0	486	517	342	81	93	142	71	60	0	1.943	2.028	2.032	2.220	2.165	1.967	0.698	156	576	1192	1320	0.958	787	405	884	436	0
2	19	16	"iYKL056C"	"iYKL056C"	10890	17940	150	188	220	141	49	53	23	82	71	0	195	240	158	82	100	180	41	12	0	1.230	1.082	1.026	1.082	2.655	0.465	0.403	156	562	252	329	0.299	139	113	171	158	0
2	20	16	"iYKL052C"	"iYKL052C"	11090	17940	150	679	798	610	49	52	13	98	94	0	402	504	381	81	84	26	82	76	0	1.963	1.771	1.719	1.913	2.046	1.734	0.878	156	552	951	1172	0.973	630	321	749	423	0
2	21	16	"iYKL048C"	"iYKL048C"	11290	17940	150	249	390	331	50	53	17	94	87	0	242	378	321	80	86	74	67	51	0	1.228	1.141	1.114	1.233	2.428	1.016	0.780	156	704	361	638	0.297	199	162	340	298	0
2	1	17	"iYLR069C"	"iYLR069C"	7280	18120	150	723	645	459	52	56	22	94	88	0	605	636	482	85	88	21	81	77	0	1.290	1.076	1.104	1.321	2.049	1.017	0.905	156	640	1191	1144	0.368	671	520	593	551	0
2	2	17	"iYLR073C"	"iYLR073C"	7480	18120	150	397	464	340	53	57	21	93	83	0	390	430	297	89	94	31	80	69	0	1.143	1.205	1.191	1.280	2.248	1.170	0.865	156	625	645	752	0.193	344	301	411	341	0
2	3	17	"iYLR078C"	"iYLR078C"	7700	18130	120	463	491	312	51	56	18	95	91	0	605	653	463	89	93	30	84	78	0	0.798	0.780	0.794	0.960	2.292	0.709	0.905	120	510	928	1004	-0.325	412	516	440	564	0
2	4	17	"iYLR094C"	"iYLR094C"	7880	18120	150	662	878	796	51	57	38	94	82	0	284	407	329	88	92	29	71	60	0	3.117	2.592	2.619	2.943	2.071	2.561	0.914	156	597	807	1146	1.640	611	196	827	319	0
2	5	17	"iYLR098C"	"iYLR098C"	8080	18120	150	419	515	420	50	60	62	69	64	0	407	540	462	86	92	48	65	60	0	1.150	1.024	0.990	1.108	1.924	0.933	0.919	156	613	690	919	0.201	369	321	465	454	0
2	6	17	"iYLR104W"	"iYLR104W"	8280	18120	150	437	413	290	51	55	20	85	78	0	532	545	402	82	84	26	77	73	0	0.858	0.782	0.765	0.791	1.694	0.741	0.937	156	580	836	825	-0.221	386	450	362	463	0
2	7	17	"iYLR117C"	"iYLR117C"	8480	18130	150	2392	2324	1798	55	61	25	90	84	0	1707	1750	1426	86	90	30	79	76	0	1.442	1.364	1.381	1.664	2.051	1.322	0.949	156	649	3958	3933	0.528	2337	1621	2269	1664	0
2	8	17	"iYLR121C"	"iYLR121C"	8680	18130	150	954	883	513	52	58	21	97	94	0	557	522	278	87	92	27	84	82	0	1.919	1.910	1.863	1.854	1.687	1.928	0.919	156	583	1372	1266	0.940	902	470	831	435	0
2	9	17	"iYLR125W"	"iYLR125W"	8880	18130	150	1336	1271	725	51	56	23	98	96	0	3405	2843	1682	85	89	34	99	95	0	0.387	0.442	0.432	0.473	1.697	0.432	0.944	156	528	4605	3978	-1.369	1285	3320	1220	2758	0
2	10	17	"itD(GUC)L1"	"itD(GUC)L1"	9080	18130	150	309	292	130	52	81	173	69	22	0	501	480	240	84	125	250	73	38	0	0.616	0.606	0.616	0.650	1.820	0.602	0.890	156	621	674	636	-0.698	257	417	240	396	0
2	11	17	"iYLR147C"	"iYLR147C"	9360	18140	160	616	607	380	53	58	22	96	92	0	676	692	447	86	93	31	87	83	0	0.954	0.914	0.910	1.011	1.695	0.880	0.949	208	640	1153	1160	-0.068	563	590	554	606	0
2	12	17	"iYLR151C"	"iYLR151C"	9540	18150	140	848	780	508	54	60	25	96	92	0	914	793	511	88	93	29	85	82	0	0.961	1.030	1.033	1.142	1.912	1.004	0.939	156	472	1620	1431	-0.057	794	826	726	705	0
2	13	17	"iYLR459W"	"iYLR459W"	9740	18140	140	1534	1416	813	53	57	21	99	98	0	1471	1270	753	88	93	32	92	89	0	1.071	1.153	1.154	1.329	1.835	1.131	0.949	156	549	2864	2545	0.099	1481	1383	1363	1182	0
2	14	17	"iYLR461W-1"	"iYLR461W-1"	9950	18140	140	16782	13225	7153	49	51	12	100	100	0	11036	8418	4943	87	91	29	100	100	0	1.528	1.582	1.558	1.694	1.536	1.551	0.960	156	503	27682	21507	0.612	16733	10949	13176	8331	0
2	15	17	"iYML132W-0"	"iYML132W-0"	10140	18140	160	2321	2450	1763	49	52	17	100	100	0	1776	2357	1809	85	88	23	100	99	0	1.344	1.057	1.032	1.137	1.590	1.017	0.959	208	509	3963	4673	0.426	2272	1691	2401	2272	0
2	16	17	"iYML117W-A"	"iYML117W-A"	10340	18130	160	875	848	521	50	52	17	99	98	0	1223	1206	760	82	85	21	96	93	0	0.723	0.710	0.714	0.799	1.803	0.692	0.931	208	498	1966	1922	-0.468	825	1141	798	1124	0
2	17	17	"iYML113W"	"iYML113W"	10540	18150	140	1255	1161	673	50	53	23	99	96	0	1572	1363	846	81	85	33	96	91	0	0.808	0.867	0.861	0.998	1.550	0.842	0.943	156	489	2696	2393	-0.307	1205	1491	1111	1282	0
2	18	17	"iYML109W"	"iYML109W"	10730	18140	130	736	616	272	50	56	33	95	91	0	1532	1273	667	82	93	54	90	84	0	0.473	0.475	0.469	0.574	1.753	0.452	0.940	120	525	2136	1757	-1.080	686	1450	566	1191	0
2	19	17	"iYML089C"	"iYML089C"	10940	18150	150	787	736	447	52	58	31	95	91	0	426	399	220	85	97	57	80	76	0	2.155	2.178	2.097	2.216	1.617	1.472	0.291	156	593	1076	998	1.108	735	341	684	314	0
2	20	17	"iYML085C"	"iYML085C"	11140	18140	140	527	506	287	53	56	17	98	96	0	457	423	240	83	88	31	85	80	0	1.267	1.332	1.316	1.435	1.945	1.282	0.920	156	537	848	793	0.342	474	374	453	340	0
2	21	17	"iYML081W"	"iYML081W"	11340	18140	140	1014	934	551	52	56	20	99	97	0	1903	1663	1011	84	88	29	98	94	0	0.529	0.559	0.546	0.621	1.695	0.555	0.946	156	727	2781	2461	-0.919	962	1819	882	1579	0
2	1	18	"iYML068W"	"iYML068W"	7330	18330	150	315	310	154	52	59	29	90	86	0	526	471	246	90	97	32	85	83	0	0.603	0.677	0.660	0.704	1.736	0.662	0.896	156	720	699	639	-0.729	263	436	258	381	0
2	2	18	"iYML064C"	"iYML064C"	7540	18340	140	1407	1443	913	54	68	56	98	94	0	1967	1873	1170	93	106	50	98	94	0	0.722	0.780	0.772	0.830	1.415	0.778	0.966	156	617	3227	3169	-0.470	1353	1874	1389	1780	0
2	3	18	"iYML060W"	"iYML060W"	7750	18340	150	991	943	545	53	65	54	96	90	0	2235	1852	1124	90	101	52	98	90	0	0.437	0.505	0.512	0.552	1.440	0.491	0.962	156	624	3083	2652	-1.193	938	2145	890	1762	0
2	4	18	"iYMR222C"	"iYMR222C"	7930	18330	130	1012	843	464	53	76	122	83	75	0	1222	992	547	89	110	103	83	78	0	0.846	0.875	0.882	0.983	2.010	0.871	0.948	120	548	2092	1693	-0.241	959	1133	790	903	0
2	5	18	"iYMR226C"	"iYMR226C"	8140	18340	140	505	512	355	51	74	116	74	65	0	527	575	399	86	104	99	72	66	0	1.029	0.943	0.960	1.000	2.100	0.935	0.918	156	623	895	950	0.042	454	441	461	489	0
2	6	18	"iYMR230W"	"iYMR230W"	8340	18340	140	1001	1074	842	50	57	27	93	88	0	440	546	406	79	82	28	82	72	0	2.634	2.193	2.169	2.383	2.186	2.182	0.935	156	584	1312	1491	1.397	951	361	1024	467	0
2	7	18	"iYMR245W"	"iYMR245W"	8550	18340	140	1390	1283	797	51	56	24	98	96	0	697	619	356	82	85	24	87	83	0	2.177	2.294	2.326	2.542	1.585	2.325	0.934	156	555	1954	1769	1.122	1339	615	1232	537	0
2	8	18	"iYMRWdelta19-0"	"iYMRWdelta19-0"	8740	18340	140	1004	1540	1414	50	54	19	84	76	0	1149	1624	1499	83	85	25	71	66	0	0.895	0.967	0.952	1.046	2.048	0.958	0.948	156	497	2020	3031	-0.160	954	1066	1490	1541	0
2	9	18	"iYMR251W-A"	"iYMR251W-A"	8930	18330	140	448	421	218	49	53	22	92	90	0	694	615	356	83	87	31	83	79	0	0.653	0.699	0.700	0.888	2.115	0.654	0.899	156	520	1010	904	-0.615	399	611	372	532	0
2	10	18	"iYMR267W"	"iYMR267W"	9140	18340	140	464	404	240	51	57	27	89	81	0	1314	1121	736	83	90	33	83	78	0	0.335	0.340	0.344	0.403	2.135	0.324	0.911	156	612	1644	1391	-1.576	413	1231	353	1038	0
2	11	18	"iYMR271C"	"iYMR271C"	9350	18340	140	1076	943	524	52	57	25	97	94	0	1184	999	589	84	90	30	91	89	0	0.931	0.974	0.984	1.155	1.646	0.946	0.965	156	547	2124	1806	-0.103	1024	1100	891	915	0
2	12	18	"iYMR273C"	"iYMR273C"	9550	18340	140	1490	1351	848	52	57	23	99	93	0	1159	1004	615	86	91	27	87	85	0	1.340	1.415	1.404	1.690	1.746	1.410	0.960	156	516	2511	2217	0.422	1438	1073	1299	918	0
2	13	18	"iYMR288W"	"iYMR288W"	9750	18340	140	587	534	261	51	56	23	92	89	0	677	601	313	88	91	31	87	85	0	0.910	0.942	0.943	0.981	1.573	0.898	0.934	156	535	1125	996	-0.136	536	589	483	513	0
2	14	18	"iYMR292W"	"iYMR292W"	9940	18340	140	221	199	94	49	52	18	90	82	0	540	460	250	87	91	30	85	80	0	0.380	0.402	0.381	0.402	1.795	0.371	0.825	156	541	625	523	-1.397	172	453	150	373	0
2	15	18	"iYMR296C"	"iYMR296C"	10150	18340	140	1307	1114	632	50	54	22	98	94	0	880	756	419	85	89	27	89	85	0	1.581	1.586	1.596	1.692	1.545	1.575	0.951	156	532	2052	1735	0.661	1257	795	1064	671	0
2	16	18	"iYNL048W"	"iYNL048W"	10350	18340	150	397	386	162	50	55	22	99	98	0	305	284	118	82	86	26	91	86	0	1.556	1.663	1.646	1.754	1.603	1.600	0.869	156	520	570	538	0.638	347	223	336	202	0
2	17	18	"iYNL043C"	"iYNL043C"	10540	18330	150	758	660	351	50	56	34	98	92	0	1001	839	479	81	92	99	85	80	0	0.770	0.805	0.821	0.978	1.851	0.774	0.956	156	548	1628	1368	-0.378	708	920	610	758	0
2	18	18	"iYNL040W"	"iYNL040W"	10750	18340	140	230	233	114	51	60	40	90	82	0	615	535	271	85	100	104	83	73	0	0.338	0.404	0.351	0.446	1.973	0.342	0.601	156	580	709	632	-1.566	179	530	182	450	0
2	19	18	"iYNL027W"	"iYNL027W"	10950	18340	140	474	455	261	52	56	18	96	91	0	1535	1408	919	86	93	38	92	90	0	0.291	0.305	0.305	0.356	1.918	0.287	0.912	156	531	1871	1725	-1.780	422	1449	403	1322	0
2	20	18	"iYNL024C"	"iYNL024C"	11150	18340	150	552	509	271	52	59	31	96	89	0	1022	894	523	88	97	43	92	85	0	0.535	0.567	0.559	0.650	1.704	0.545	0.930	156	561	1434	1263	-0.901	500	934	457	806	0
2	21	18	"iYNL020C"	"iYNL020C"	11360	18340	140	272	286	160	52	58	24	96	92	0	777	710	362	85	92	34	93	91	0	0.318	0.374	0.316	0.409	2.243	0.339	0.662	156	742	912	859	-1.653	220	692	234	625	0
2	1	19	"iYNL003C"	"iYNL003C"	7350	18530	150	1530	1533	925	53	64	47	98	94	0	1057	980	594	92	101	40	89	85	0	1.531	1.667	1.659	1.896	1.573	1.631	0.973	156	713	2442	2368	0.614	1477	965	1480	888	0
2	2	19	"iYNR001C"	"iYNR001C"	7540	18530	150	2362	2037	1065	56	85	91	98	95	0	1506	1292	671	94	115	69	95	91	0	1.633	1.654	1.653	1.778	1.464	1.625	0.962	156	583	3718	3179	0.708	2306	1412	1981	1198	0
2	3	19	"iYNR002C"	"iYNR002C"	7760	18540	150	458	461	229	57	82	84	89	80	0	764	728	429	92	113	73	85	80	0	0.597	0.635	0.616	0.763	1.948	0.595	0.899	156	581	1073	1040	-0.745	401	672	404	636	0
2	4	19	"iYNR018W"	"iYNR018W"	7960	18540	150	976	870	520	56	79	106	91	80	0	892	816	516	92	116	99	82	73	0	1.150	1.124	1.168	1.357	1.612	1.070	0.955	156	596	1720	1538	0.202	920	800	814	724	0
2	5	19	"iYNR022C"	"iYNR022C"	8170	18540	150	507	484	257	53	60	33	92	89	0	471	477	262	86	93	34	85	82	0	1.179	1.102	1.114	1.246	1.744	1.057	0.936	156	557	839	822	0.238	454	385	431	391	0
2	6	19	"iYNR027W"	"iYNR027W"	8350	18530	130	249	270	200	51	57	26	74	69	0	295	313	231	80	86	35	65	61	0	0.921	0.940	0.845	0.946	2.234	0.952	0.854	120	498	413	452	-0.119	198	215	219	233	0
2	7	19	"iYOR064C"	"iYOR064C"	8550	18540	140	696	715	502	52	57	25	91	86	0	381	391	261	79	84	31	79	75	0	2.132	2.125	2.093	2.385	1.910	2.085	0.915	156	556	946	975	1.093	644	302	663	312	0
2	8	19	"iYOR068C"	"iYOR068C"	8760	18540	160	603	1323	1358	52	57	31	82	79	0	818	2241	2403	80	84	34	80	76	0	0.747	0.588	0.586	0.692	1.890	0.568	0.963	208	590	1289	3432	-0.422	551	738	1271	2161	0
2	9	19	"iYOR071C"	"iYOR071C"	8960	18530	150	668	648	383	50	56	32	96	93	0	602	582	339	82	84	33	89	87	0	1.188	1.196	1.234	1.303	1.470	1.164	0.958	156	546	1138	1098	0.249	618	520	598	500	0
2	10	19	"iYOR086C"	"iYOR086C"	9140	18540	150	2144	1903	1119	50	70	99	91	88	0	964	826	476	84	98	77	83	79	0	2.380	2.497	2.500	2.708	1.466	2.469	0.971	156	555	2974	2595	1.251	2094	880	1853	742	0
2	11	19	"iYOR090C"	"iYOR090C"	9340	18540	140	1073	1062	699	51	70	78	87	82	0	783	733	486	84	97	59	82	76	0	1.462	1.558	1.588	1.780	1.714	1.511	0.962	156	581	1721	1660	0.548	1022	699	1011	649	0
2	12	19	"iYOR094W"	"iYOR094W"	9550	18540	140	710	672	360	51	60	40	94	89	0	842	772	436	87	94	42	87	87	0	0.873	0.907	0.892	0.993	1.512	0.872	0.947	156	556	1414	1306	-0.196	659	755	621	685	0
2	13	19	"iYOR112W"	"iYOR112W"	9750	18540	140	1078	1025	605	51	59	34	94	91	0	811	708	421	88	94	34	87	83	0	1.420	1.571	1.592	1.745	1.463	1.530	0.966	156	539	1750	1594	0.506	1027	723	974	620	0
2	14	19	"iYOR116C"	"iYOR116C"	9950	18540	150	2042	1836	1168	50	56	29	98	97	0	1115	959	611	86	91	25	89	87	0	1.936	2.046	2.091	2.282	1.503	2.009	0.974	156	559	3021	2659	0.953	1992	1029	1786	873	0
2	15	19	"iYOR121C"	"iYOR121C"	10150	18540	140	485	446	245	51	58	27	89	85	0	734	626	375	86	95	34	85	83	0	0.670	0.731	0.724	0.796	1.537	0.689	0.937	156	552	1082	935	-0.578	434	648	395	540	0
2	16	19	"iYOR138C"	"iYOR138C"	10350	18540	140	903	896	526	52	60	31	96	94	0	704	640	346	86	95	40	89	85	0	1.377	1.523	1.470	1.665	1.593	1.544	0.933	156	553	1469	1398	0.462	851	618	844	554	0
2	17	19	"itG(CCC)O"	"itG(CCC)O"	10550	18540	140	139	157	121	51	61	57	72	34	0	201	200	94	85	98	106	54	16	0	0.759	0.922	0.720	0.831	2.297	1.112	0.487	156	570	204	221	-0.399	88	116	106	115	0
2	18	19	"iYOR146W"	"iYOR146W"	10750	18540	140	788	721	433	51	67	86	92	81	0	341	319	219	87	107	135	69	43	0	2.902	2.888	2.969	3.097	1.985	2.451	0.628	156	563	991	902	1.537	737	254	670	232	0
2	19	19	"iYPL228W"	"iYPL228W"	10950	18540	140	290	281	137	51	64	69	85	69	0	710	658	394	91	107	91	83	72	0	0.386	0.406	0.401	0.450	1.802	0.357	0.828	156	563	858	797	-1.373	239	619	230	567	0
2	20	19	"iYPL224C"	"iYPL224C"	11150	18530	150	2651	2178	1259	54	74	104	96	92	0	2033	1628	959	94	117	122	89	83	0	1.339	1.385	1.400	1.539	1.489	1.364	0.973	156	579	4536	3658	0.422	2597	1939	2124	1534	0
2	21	19	"iYPL220W"	"iYPL220W"	11350	18540	140	1291	1151	638	53	74	106	93	86	0	1196	1060	605	90	111	131	87	80	0	1.119	1.132	1.140	1.280	1.591	1.106	0.969	156	695	2344	2068	0.163	1238	1106	1098	970	0
2	1	20	"iYPL203W"	"iYPL203W"	7360	18740	170	1655	1681	1000	54	61	37	99	97	0	4999	4982	3070	90	99	128	100	93	0	0.326	0.333	0.334	0.352	1.500	0.325	0.964	208	1177	6510	6519	-1.616	1601	4909	1627	4892	0
2	2	20	"iYPL199C"	"iYPL199C"	7560	18740	150	1249	1107	651	54	70	66	92	85	0	1368	1165	691	89	106	163	82	76	0	0.934	0.979	1.001	1.122	1.723	0.965	0.943	156	753	2474	2129	-0.098	1195	1279	1053	1076	0
2	3	20	"iYPL195W"	"iYPL195W"	7750	18730	150	900	815	504	55	70	61	91	84	0	1122	1017	671	89	102	56	84	80	0	0.818	0.819	0.813	0.991	1.976	0.789	0.937	156	739	1878	1688	-0.290	845	1033	760	928	0
2	4	20	"itE(UUC)P"	"itE(UUC)P"	7950	18730	140	374	355	180	55	63	34	91	84	0	512	472	247	92	102	45	85	81	0	0.760	0.789	0.767	0.872	2.166	0.753	0.857	156	702	739	680	-0.397	319	420	300	380	0
2	5	20	"iYPL177C-0"	"iYPL177C-0"	8160	18730	140	2355	2026	1126	54	62	38	100	94	0	1294	1074	601	89	95	32	93	89	0	1.910	2.002	2.071	2.180	1.459	1.981	0.951	156	679	3506	2957	0.933	2301	1205	1972	985	0
2	6	20	"iYPL174C"	"iYPL174C"	8360	18750	160	372	707	767	51	59	33	74	68	0	327	584	611	82	85	32	66	61	0	1.310	1.307	1.240	1.293	1.887	1.286	0.916	208	893	566	1158	0.390	321	245	656	502	0
2	7	20	"iYPL157W"	"iYPL157W"	8560	18740	150	781	732	392	51	56	21	99	97	0	964	872	513	75	81	37	95	90	0	0.821	0.854	0.828	0.981	1.824	0.826	0.904	156	725	1619	1478	-0.284	730	889	681	797	0
2	8	20	"iYPL153C"	"iYPL153C"	8750	18740	140	1111	1379	1194	53	61	44	91	79	0	453	638	537	82	88	42	75	68	0	2.852	2.385	2.283	2.493	2.187	2.359	0.922	156	766	1429	1882	1.512	1058	371	1326	556	0
2	9	20	"iYPL149W"	"iYPL149W"	8980	18720	100	407	409	280	52	64	56	76	75	0	337	344	229	79	84	46	73	67	0	1.376	1.347	1.301	1.348	1.819	1.278	0.910	80	444	613	622	0.460	355	258	357	265	0
2	10	20	"itG(GCC)P2"	"itG(GCC)P2"	9150	18730	130	2119	1798	957	52	82	124	87	84	0	1756	1458	796	86	106	102	83	82	0	1.238	1.273	1.285	1.484	1.817	1.251	0.958	120	633	3737	3118	0.308	2067	1670	1746	1372	0
2	11	20	"iYPR163C"	"iYPR163C"	9360	18740	140	2603	2223	1243	53	83	123	99	91	0	954	813	423	86	108	97	86	81	0	2.938	2.985	3.060	3.376	1.647	3.025	0.908	156	755	3418	2897	1.555	2550	868	2170	727	0
2	12	20	"iYPR167C"	"iYPR167C"	9560	18730	150	2728	2439	1347	55	72	79	100	99	0	2165	1879	1052	89	103	63	100	96	0	1.288	1.332	1.332	1.394	1.346	1.311	0.958	156	758	4749	4174	0.365	2673	2076	2384	1790	0
2	13	20	"iYPR183W"	"iYPR183W"	9770	18740	150	4553	3681	2421	53	65	62	100	98	0	2022	1751	1159	89	100	55	91	87	0	2.328	2.183	2.257	2.447	1.604	2.161	0.952	156	766	6433	5290	1.219	4500	1933	3628	1662	0
2	14	20	"iYPR187W"	"iYPR187W"	9960	18740	140	822	774	477	52	58	28	98	93	0	826	769	474	87	103	197	76	67	0	1.042	1.059	1.071	1.269	1.882	0.904	0.718	156	692	1509	1404	0.059	770	739	722	682	0
2	15	20	"iYPR191W"	"iYPR191W"	10160	18740	150	3774	3127	1826	52	62	38	100	100	0	2296	1892	1198	88	105	191	87	80	0	1.686	1.705	1.737	1.938	1.474	1.633	0.956	156	748	5930	4879	0.753	3722	2208	3075	1804	0
2	16	20	"YALCdelta2"	"YALCdelta2"	10350	18740	140	1113	1027	622	54	67	48	98	92	0	1438	1224	751	91	103	52	89	85	0	0.786	0.859	0.867	1.001	1.815	0.849	0.936	156	710	2406	2106	-0.347	1059	1347	973	1133	0
2	17	20	"YBLWTy2-1B"	"YBLWTy2-1B"	10560	18740	150	4441	4913	4208	54	70	90	100	97	0	2436	3592	3075	93	107	73	99	96	0	1.872	1.389	1.395	1.483	1.542	1.387	0.962	156	766	6730	8358	0.905	4387	2343	4859	3499	0
2	18	20	"YBLWdelta10"	"YBLWdelta10"	10750	18740	150	9538	9272	6399	53	83	134	100	100	0	10825	10378	7189	92	126	158	100	100	0	0.884	0.896	0.894	0.938	1.388	0.892	0.974	156	766	20218	19505	-0.178	9485	10733	9219	10286	0
2	19	20	"YFRWdelta10"	"YFRWdelta10"	10960	18740	140	1552	1374	811	54	79	108	92	86	0	1811	1603	977	97	129	149	85	78	0	0.874	0.876	0.906	0.999	1.585	0.850	0.947	156	754	3212	2826	-0.194	1498	1714	1320	1506	0
2	20	20	"YGRCTy1-2A"	"YGRCTy1-2A"	11170	18740	150	20294	16005	9374	55	86	179	100	100	0	18677	14175	8807	96	133	232	100	100	0	1.089	1.133	1.121	1.182	1.355	1.104	0.968	156	784	38820	30029	0.123	20239	18581	15950	14079	0
2	21	20	"YHLComega1"	"YHLComega1"	11360	18740	140	2379	2185	1436	52	80	171	91	82	0	3957	3498	2412	90	125	225	89	82	0	0.602	0.626	0.636	0.679	1.509	0.609	0.955	156	850	6194	5541	-0.733	2327	3867	2133	3408	0
3	1	1	"PET112"	"YBL080C"	11730	15060	140	1498	1346	843	49	51	12	99	99	0	1225	1062	651	85	87	24	92	90	0	1.271	1.328	1.300	1.431	1.678	1.336	0.938	156	833	2589	2274	0.346	1449	1140	1297	977	0
3	2	1	"YBL111C"	"YBL111C"	11930	15050	140	6722	5919	3845	51	57	56	100	98	0	4465	3999	2672	89	108	364	86	81	0	1.524	1.501	1.466	1.541	1.334	1.471	0.970	156	736	11047	9778	0.608	6671	4376	5868	3910	0
3	3	1	"YBR028C"	"YBR028C"	12130	15060	140	1186	1041	585	51	57	56	94	90	0	1080	924	512	88	93	47	90	86	0	1.144	1.184	1.208	1.229	1.654	1.176	0.949	156	726	2127	1826	0.194	1135	992	990	836	0
3	4	1	"RHK1"	"YBL082C"	12320	15060	130	2372	1916	1156	51	54	16	100	99	0	1225	1039	617	89	92	23	89	86	0	2.043	1.963	1.959	2.186	1.845	1.980	0.945	120	624	3457	2815	1.031	2321	1136	1865	950	0
3	5	1	"YBL113C"	"YBL113C"	12520	15060	150	5438	4671	2590	52	56	22	100	99	0	6819	5949	3327	89	92	23	100	100	0	0.800	0.788	0.790	0.798	1.367	0.782	0.969	156	828	12116	10479	-0.321	5386	6730	4619	5860	0
3	6	1	"YBR030W"	"YBR030W"	12720	15060	130	1131	1018	469	51	54	20	98	95	0	1264	1074	506	87	90	23	93	91	0	0.918	0.980	0.978	1.057	1.552	0.957	0.962	120	660	2257	1954	-0.124	1080	1177	967	987	0
3	7	1	"CDC27"	"YBL084C"	12920	15060	130	1778	1512	778	50	52	14	99	98	0	3191	2728	1485	90	100	143	89	84	0	0.557	0.554	0.553	0.619	1.610	0.534	0.945	120	664	4829	4100	-0.844	1728	3101	1462	2638	0
3	8	1	"RER2"	"YBR002C"	13110	15050	130	1687	1459	814	50	52	14	100	99	0	1552	1305	730	89	93	38	89	86	0	1.119	1.159	1.163	1.290	1.559	1.152	0.958	120	687	3100	2625	0.162	1637	1463	1409	1216	0
3	9	1	"YBR032W"	"YBR032W"	13320	15060	130	1951	1724	890	49	52	14	99	98	0	1162	950	496	84	87	21	90	88	0	1.764	1.934	1.978	2.154	1.516	1.923	0.964	120	680	2980	2541	0.819	1902	1078	1675	866	0
3	10	1	"YBL086C"	"YBL086C"	13510	15050	120	1029	910	523	51	53	16	94	91	0	608	566	332	87	93	50	85	80	0	1.877	1.793	1.742	1.917	1.812	1.720	0.911	120	601	1499	1338	0.909	978	521	859	479	0
3	11	1	"YBR004C"	"YBR004C"	13710	15060	130	1002	913	436	53	57	20	99	95	0	3315	2920	1458	90	95	28	100	99	0	0.294	0.304	0.311	0.313	1.300	0.300	0.961	120	678	4174	3690	-1.765	949	3225	860	2830	0
3	12	1	"HMT1"	"YBR034C"	13910	15060	130	2446	2116	1060	51	54	17	100	100	0	4892	4151	2156	87	93	54	100	98	0	0.498	0.508	0.510	0.526	1.264	0.502	0.974	120	693	7200	6129	-1.005	2395	4805	2065	4064	0
3	13	1	"YCL044C"	"YCL044C"	14120	15060	120	128	142	70	52	55	17	83	72	0	238	247	120	91	97	58	75	61	0	0.517	0.577	0.499	0.524	2.273	0.413	0.540	120	623	223	246	-0.952	76	147	90	156	0
3	14	1	"YCLX03C"	"YCLX03C"	14320	15050	130	1544	1329	712	52	57	32	99	95	0	3283	2799	1616	94	99	36	100	98	0	0.468	0.472	0.478	0.492	1.390	0.458	0.969	120	686	4681	3982	-1.096	1492	3189	1277	2705	0
3	15	1	"YCR022C"	"YCR022C"	14520	15060	130	3109	2779	1426	53	59	33	100	100	0	4111	3500	1774	100	110	127	98	89	0	0.762	0.802	0.809	0.832	1.258	0.803	0.963	120	701	7067	6126	-0.392	3056	4011	2726	3400	0
3	16	1	"YCL046W"	"YCL046W"	14720	15050	110	177	656	829	54	58	19	95	83	0	258	815	990	104	108	26	93	83	0	0.799	0.847	0.807	0.895	2.305	0.838	0.967	80	552	277	1313	-0.324	123	154	602	711	0
3	17	1	"YCLX05C"	"YCLX05C"	14920	15050	120	4823	3884	2078	57	112	400	86	84	0	4756	3750	2100	123	171	368	85	82	0	1.029	1.055	1.067	1.169	1.467	1.027	0.979	120	633	9399	7454	0.041	4766	4633	3827	3627	0
3	18	1	"YCR024C"	"YCR024C"	15120	15060	130	5057	4529	1947	58	106	372	95	90	0	3430	2996	1284	126	160	262	90	89	0	1.513	1.558	1.588	1.669	1.433	1.553	0.980	120	732	8303	7341	0.597	4999	3304	4471	2870	0
3	19	1	"YCL048W"	"YCL048W"	15320	15050	90	886	1305	1148	57	65	28	100	100	0	736	1167	1154	126	131	33	96	94	0	1.359	1.199	1.370	1.576	1.692	1.078	0.947	52	400	1439	2289	0.443	829	610	1248	1041	0
3	20	1	"YCLX07W"	"YCLX07W"	15520	15060	120	2731	2300	1050	57	64	27	100	100	0	3432	2846	1331	122	128	32	100	100	0	0.808	0.823	0.819	0.871	1.293	0.813	0.981	120	639	5984	4967	-0.308	2674	3310	2243	2724	0
3	21	1	"YCR025C"	"YCR025C"	15720	15060	140	2658	2149	1259	56	62	29	98	95	0	1037	871	459	119	122	29	89	87	0	2.834	2.783	2.840	3.011	1.558	2.806	0.964	156	881	3520	2845	1.503	2602	918	2093	752	0
3	1	2	"APA1"	"YCL050C"	11720	15250	120	238	267	166	50	53	16	87	85	0	410	443	287	85	87	25	85	80	0	0.578	0.606	0.599	0.640	1.783	0.578	0.908	120	519	513	575	-0.790	188	325	217	358	0
3	2	2	"YCLX09W"	"YCLX09W"	11920	15250	130	3727	3076	1539	51	59	64	96	93	0	3103	2514	1288	90	96	55	95	90	0	1.220	1.248	1.257	1.308	1.451	1.235	0.967	120	555	6689	5449	0.287	3676	3013	3025	2424	0
3	3	2	"RSG1"	"YCR027C"	12120	15250	130	4614	3826	1879	52	57	32	100	100	0	3975	3327	1653	90	95	35	100	97	0	1.174	1.166	1.172	1.189	1.315	1.152	0.963	120	589	8447	7011	0.232	4562	3885	3774	3237	0
3	4	2	"YDL211C"	"YDL211C"	12320	15250	120	591	589	344	51	54	15	94	93	0	469	495	311	86	89	23	88	85	0	1.410	1.315	1.389	1.449	1.763	1.242	0.909	120	546	923	947	0.496	540	383	538	409	0
3	5	2	"AAD4"	"YDL243C"	12520	15250	120	96	104	49	52	54	15	80	65	0	194	190	88	85	90	24	78	69	0	0.404	0.495	0.428	0.443	2.218	0.454	0.588	120	540	153	157	-1.309	44	109	52	105	0
3	6	2	"LUV1"	"YDR027C"	12720	15250	120	1594	1391	569	50	54	16	100	100	0	2264	1938	822	86	93	123	95	90	0	0.709	0.724	0.715	0.751	1.398	0.714	0.964	120	572	3722	3193	-0.496	1544	2178	1341	1852	0
3	7	2	"YDL213C"	"YDL213C"	12930	15250	120	598	707	484	51	54	15	97	94	0	402	480	311	90	102	154	74	50	0	1.753	1.682	1.724	1.711	1.820	1.422	0.532	120	572	859	1046	0.810	547	312	656	390	0
3	8	2	"HXT15"	"YDL245C"	13130	15250	130	5814	5625	2363	51	55	16	100	100	0	5199	4711	2054	90	94	22	100	100	0	1.128	1.206	1.186	1.231	1.320	1.203	0.946	120	596	10872	10195	0.174	5763	5109	5574	4621	0
3	9	2	"YDR029W"	"YDR029W"	13330	15250	130	1194	989	470	51	53	15	98	96	0	474	413	188	86	88	20	90	88	0	2.946	2.869	2.876	2.999	1.467	2.863	0.923	120	598	1531	1265	1.559	1143	388	938	327	0
3	10	2	"GDH2"	"YDL215C"	13530	15250	120	1413	1324	749	52	56	28	98	95	0	1021	955	541	90	102	205	80	75	0	1.462	1.471	1.483	1.621	1.563	1.360	0.793	120	573	2292	2137	0.548	1361	931	1272	865	0
3	11	2	"YDL247W"	"YDL247W"	13730	15250	120	440	500	339	52	56	20	95	92	0	484	579	384	89	92	23	89	87	0	0.982	0.914	0.907	0.961	1.674	0.892	0.907	120	557	783	938	-0.026	388	395	448	490	0
3	12	2	"YDR031W"	"YDR031W"	13930	15250	130	709	768	434	51	56	20	97	95	0	573	560	302	89	95	58	87	80	0	1.360	1.522	1.539	1.667	1.597	1.510	0.923	120	581	1142	1188	0.443	658	484	717	471	0
3	13	2	"TIM22"	"YDL217C"	14120	15250	130	699	757	541	52	58	24	98	93	0	841	973	734	91	99	59	89	85	0	0.863	0.799	0.785	0.928	1.826	0.756	0.904	120	597	1397	1587	-0.213	647	750	705	882	0
3	14	2	"NTH1"	"YDR001C"	14320	15250	130	343	420	276	53	59	28	92	88	0	977	1058	658	93	99	33	93	90	0	0.328	0.380	0.389	0.380	1.711	0.379	0.895	120	614	1174	1332	-1.608	290	884	367	965	0
3	15	2	"MRH1"	"YDR033W"	14520	15250	120	1002	1017	640	54	61	32	99	95	0	1650	1787	1154	96	103	35	100	98	0	0.610	0.569	0.579	0.581	1.423	0.558	0.922	120	573	2502	2654	-0.713	948	1554	963	1691	0
3	16	2	"YDR346C"	"YDR346C"	14730	15260	130	1936	1820	896	54	59	24	100	100	0	1843	1813	920	103	108	28	100	100	0	1.082	1.033	1.043	1.057	1.382	1.038	0.892	120	647	3622	3476	0.113	1882	1740	1766	1710	0
3	17	2	"LSM6"	"YDR378C"	14930	15260	140	2374	2104	967	57	63	28	100	100	0	770	701	270	118	122	31	98	96	0	3.554	3.511	3.459	3.578	1.433	3.610	0.947	156	663	2969	2630	1.829	2317	652	2047	583	0
3	18	2	"STE14"	"YDR410C"	15130	15260	130	4101	3427	1538	57	63	33	100	99	0	4526	3764	1717	123	129	36	100	100	0	0.918	0.926	0.926	0.941	1.373	0.915	0.971	120	615	8447	7011	-0.123	4044	4403	3370	3641	0
3	19	2	"YDR348C"	"YDR348C"	15330	15250	110	927	1020	633	59	74	68	100	98	0	890	1010	631	128	140	65	97	90	0	1.139	1.090	1.133	1.187	1.490	1.039	0.937	80	547	1630	1843	0.188	868	762	961	882	0
3	20	2	"YDR380W"	"YDR380W"	15530	15260	130	6524	5817	2161	59	71	55	100	100	0	2141	1893	753	124	132	47	100	100	0	3.205	3.255	3.277	3.429	1.274	3.246	0.961	120	618	8482	7527	1.680	6465	2017	5758	1769	0
3	21	2	"YDR412W"	"YDR412W"	15730	15260	140	4512	3962	2267	57	64	29	100	100	0	2285	1921	1110	118	127	112	94	87	0	2.056	2.166	2.166	2.342	1.589	2.152	0.964	156	767	6622	5708	1.040	4455	2167	3905	1803	0
3	1	3	"TCM10"	"YDR350C"	11750	15440	150	3405	3019	1494	51	54	17	100	100	0	1858	1656	805	84	87	24	99	98	0	1.891	1.888	1.896	1.927	1.254	1.901	0.981	156	795	5128	4540	0.919	3354	1774	2968	1572	0
3	2	3	"RPP2B"	"YDR382W"	11940	15450	140	931	837	446	51	53	18	99	98	0	909	851	445	86	90	27	97	95	0	1.069	1.027	1.028	1.097	1.681	1.022	0.966	156	630	1703	1551	0.097	880	823	786	765	0
3	3	3	"ERD1"	"YDR414C"	12140	15460	130	4511	3859	1808	51	52	13	100	100	0	2425	2086	981	86	89	20	100	100	0	1.907	1.904	1.880	1.957	1.259	1.901	0.977	120	612	6799	5808	0.931	4460	2339	3808	2000	0
3	4	3	"YDR352W"	"YDR352W"	12350	15450	130	5416	4738	2233	51	54	16	100	100	0	5814	5023	2416	87	90	20	100	100	0	0.937	0.950	0.946	0.955	1.216	0.941	0.984	120	629	11092	9623	-0.094	5365	5727	4687	4936	0
3	5	3	"YDR384C"	"YDR384C"	12540	15460	130	2940	2659	1270	52	55	17	100	100	0	1935	1686	829	88	91	20	99	97	0	1.564	1.631	1.640	1.737	1.337	1.611	0.977	120	615	4735	4205	0.645	2888	1847	2607	1598	0
3	6	3	"SYF1"	"YDR416W"	12740	15460	120	3896	3665	1712	52	56	16	100	100	0	2678	2418	1139	88	91	21	100	100	0	1.484	1.551	1.574	1.591	1.246	1.544	0.978	120	572	6434	5943	0.570	3844	2590	3613	2330	0
3	7	3	"SHC1"	"YER096W"	12950	15460	130	4239	3621	1537	52	55	16	100	100	0	2918	2531	1069	91	94	22	100	100	0	1.481	1.463	1.426	1.494	1.247	1.450	0.970	120	594	7014	6009	0.567	4187	2827	3569	2440	0
3	8	3	"LCP5"	"YER127W"	13140	15450	140	5017	4405	2032	52	55	15	100	100	0	3641	3293	1499	90	92	20	100	100	0	1.398	1.359	1.365	1.377	1.226	1.364	0.984	156	672	8516	7556	0.484	4965	3551	4353	3203	0
3	9	3	"BUR6"	"YER159C"	13340	15450	130	4694	4101	1707	53	59	32	100	100	0	1676	1478	628	88	91	23	99	97	0	2.923	2.912	2.972	3.013	1.245	2.894	0.981	120	596	6229	5438	1.547	4641	1588	4048	1390	0
3	10	3	"UBP9"	"YER098W"	13540	15460	130	5030	4695	2460	53	61	39	100	100	0	4428	4192	2121	94	104	194	99	95	0	1.148	1.133	1.137	1.134	1.251	1.139	0.963	120	614	9311	8740	0.200	4977	4334	4642	4098	0
3	11	3	"PAK1"	"YER129W"	13730	15460	130	3928	3596	2207	54	60	29	100	100	0	5526	5403	3209	97	102	30	100	100	0	0.714	0.668	0.670	0.669	1.239	0.679	0.979	120	612	9303	8848	-0.487	3874	5429	3542	5306	0
3	12	3	"SPT2"	"YER161C"	13940	15460	140	8094	6904	3823	54	60	30	100	100	0	4997	4421	2495	95	100	30	99	98	0	1.640	1.583	1.586	1.657	1.307	1.577	0.984	156	701	12942	11176	0.714	8040	4902	6850	4326	0
3	13	3	"UBC6"	"YER100W"	14140	15460	130	5065	4453	1946	54	60	24	100	100	0	4406	3765	1728	96	100	29	100	100	0	1.163	1.199	1.208	1.255	1.238	1.195	0.981	120	613	9321	8068	0.217	5011	4310	4399	3669	0
3	14	3	"RPS26B"	"YER131W"	14340	15450	130	5034	4468	2326	55	61	31	100	100	0	5679	4957	2657	99	105	40	100	100	0	0.892	0.908	0.917	0.932	1.229	0.903	0.982	120	632	10559	9271	-0.164	4979	5580	4413	4858	0
3	15	3	"YER163C"	"YER163C"	14540	15460	130	4755	4418	5703	54	61	31	100	100	0	1066	942	476	99	106	40	95	93	0	4.861	5.177	4.824	5.026	1.401	9.344	0.600	120	612	5668	5207	2.281	4701	967	4364	843	0
3	16	3	"RPS8B"	"YER102W"	14740	15460	130	5049	4280	1858	55	63	32	100	100	0	2470	2101	900	104	111	31	99	97	0	2.111	2.116	2.114	2.164	1.211	2.139	0.978	120	613	7360	6222	1.078	4994	2366	4225	1997	0
3	17	3	"GLC7"	"YER133W"	14950	15460	140	3148	2929	1877	56	62	28	100	100	0	1648	1486	908	116	120	31	97	92	0	2.018	2.097	2.160	2.298	1.466	2.110	0.977	156	656	4624	4243	1.013	3092	1532	2873	1370	0
3	18	3	"PAB1"	"YER165W"	15150	15460	120	4509	3972	1767	56	63	30	100	100	0	1540	1357	564	120	125	36	100	95	0	3.136	3.166	3.179	3.197	1.191	3.199	0.978	120	543	5873	5153	1.649	4453	1420	3916	1237	0
3	19	3	"CDC43"	"YGL155W"	15340	15460	130	6684	5624	2512	59	75	73	100	100	0	4420	3722	1675	128	141	66	100	100	0	1.544	1.548	1.566	1.601	1.213	1.546	0.984	120	633	10917	9159	0.626	6625	4292	5565	3594	0
3	20	3	"COX4"	"YGL187C"	15540	15460	130	2852	2512	1223	60	73	52	100	98	0	1483	1278	581	129	138	49	95	91	0	2.062	2.134	2.169	2.255	1.396	2.147	0.972	120	598	4146	3601	1.044	2792	1354	2452	1149	0
3	21	3	"YGL219C"	"YGL219C"	15730	15460	130	6703	5766	2806	59	68	39	100	100	0	2973	2633	1269	117	124	35	99	97	0	2.326	2.268	2.281	2.397	1.305	2.275	0.984	120	662	9500	8223	1.218	6644	2856	5707	2516	0
3	1	4	"YGL157W"	"YGL157W"	11740	15650	130	3289	2764	1303	51	55	22	100	100	0	1434	1210	593	85	88	24	96	91	0	2.400	2.412	2.442	2.680	1.438	2.370	0.970	120	748	4587	3838	1.263	3238	1349	2713	1125	0
3	2	4	"RPS26A"	"YGL189C"	11950	15650	130	3769	3186	1596	52	57	27	100	100	0	3567	2965	1512	88	93	29	100	100	0	1.068	1.089	1.100	1.113	1.324	1.090	0.971	120	626	7196	6011	0.095	3717	3479	3134	2877	0
3	3	4	"NIF3"	"YGL221C"	12150	15650	130	5415	4406	2135	52	57	41	100	100	0	2865	2344	1150	87	92	35	99	99	0	1.931	1.929	1.930	1.968	1.245	1.935	0.973	120	629	8141	6611	0.949	5363	2778	4354	2257	0
3	4	4	"YGL159W"	"YGL159W"	12360	15660	130	2733	2503	1335	52	58	40	100	99	0	1914	1884	990	90	94	32	99	95	0	1.470	1.366	1.355	1.426	1.390	1.373	0.969	120	628	4505	4245	0.556	2681	1824	2451	1794	0
3	5	4	"COX13"	"YGL191W"	12550	15660	130	1357	1186	580	53	57	19	100	97	0	2504	2203	1120	93	100	106	95	90	0	0.541	0.537	0.545	0.552	1.340	0.534	0.967	120	599	3715	3243	-0.887	1304	2411	1133	2110	0
3	6	4	"YGL223C"	"YGL223C"	12750	15650	120	4763	4318	1855	53	59	24	100	100	0	4027	3677	1695	91	101	112	100	95	0	1.197	1.189	1.187	1.244	1.289	1.173	0.973	120	543	8646	7851	0.259	4710	3936	4265	3586	0
3	7	4	"YGL161C"	"YGL161C"	12940	15650	130	4319	3609	1903	52	61	43	100	99	0	2528	2164	1186	88	95	42	100	95	0	1.749	1.713	1.712	1.792	1.348	1.695	0.964	120	614	6707	5633	0.806	4267	2440	3557	2076	0
3	8	4	"YGL193C"	"YGL193C"	13150	15660	130	1775	1605	791	52	58	40	98	95	0	1289	1137	543	87	95	66	94	90	0	1.433	1.479	1.508	1.547	1.423	1.486	0.967	120	620	2925	2603	0.519	1723	1202	1553	1050	0
3	9	4	"GOG5"	"YGL225W"	13340	15650	130	4767	4107	2070	54	62	43	100	100	0	5854	5044	2685	90	98	56	100	100	0	0.818	0.818	0.833	0.861	1.302	0.801	0.973	120	630	10477	9007	-0.290	4713	5764	4053	4954	0
3	10	4	"RNH70"	"YGR276C"	13550	15660	130	5023	4113	2019	54	61	36	100	100	0	3262	2774	1433	94	103	57	97	92	0	1.568	1.515	1.505	1.648	1.421	1.493	0.973	120	611	8137	6739	0.649	4969	3168	4059	2680	0
3	11	4	"YHL012W"	"YHL012W"	13750	15660	120	3100	2925	1306	55	61	27	100	100	0	5584	5183	2370	101	104	29	100	100	0	0.555	0.565	0.569	0.576	1.265	0.560	0.975	120	544	8528	7952	-0.849	3045	5483	2870	5082	0
3	12	4	"YHL044W"	"YHL044W"	13950	15660	130	5095	4490	2010	55	61	30	100	100	0	4179	3535	1608	95	99	27	100	100	0	1.234	1.289	1.290	1.348	1.316	1.286	0.977	120	590	9124	7875	0.303	5040	4084	4435	3440	0
3	13	4	"YGR278W"	"YGR278W"	14150	15660	130	7253	6647	2742	56	63	31	100	100	0	3721	3265	1417	95	101	34	100	99	0	1.985	2.079	2.045	2.157	1.220	2.068	0.977	120	630	10823	9761	0.989	7197	3626	6591	3170	0
3	14	4	"YLF2"	"YHL014C"	14350	15660	120	3768	3332	1406	57	64	34	100	100	0	7168	6224	2753	103	112	44	100	100	0	0.525	0.535	0.538	0.558	1.231	0.525	0.977	120	555	10776	9396	-0.929	3711	7065	3275	6121	0
3	15	4	"YHL046C"	"YHL046C"	14550	15660	140	7379	6793	4027	55	60	28	100	100	0	7130	6339	3821	99	108	99	100	98	0	1.042	1.080	1.081	1.080	1.365	1.073	0.977	156	690	14355	12978	0.059	7324	7031	6738	6240	0
3	16	4	"YGR280C"	"YGR280C"	14760	15660	130	6667	6163	2450	53	58	24	100	100	0	2941	2657	1047	102	111	104	98	95	0	2.330	2.391	2.363	2.428	1.188	2.412	0.980	120	612	9453	8665	1.220	6614	2839	6110	2555	0
3	17	4	"DUR3"	"YHL016C"	14950	15660	130	5156	4723	2093	56	61	20	100	100	0	9042	8143	3666	117	121	30	100	100	0	0.571	0.581	0.585	0.590	1.176	0.578	0.975	120	594	14025	12693	-0.807	5100	8925	4667	8026	0
3	18	4	"COS8"	"YHL048W"	15160	15670	130	6269	5263	2708	56	62	51	100	100	0	5550	4645	2397	121	127	47	100	99	0	1.144	1.151	1.147	1.221	1.352	1.150	0.976	120	613	11642	9731	0.195	6213	5429	5207	4524	0
3	19	4	"BGL2"	"YGR282C"	15350	15660	130	3313	2859	1190	57	68	65	100	100	0	6564	5532	2373	129	141	87	100	100	0	0.506	0.519	0.521	0.545	1.257	0.510	0.975	120	598	9691	8205	-0.983	3256	6435	2802	5403	0
3	20	4	"YHL018W"	"YHL018W"	15550	15660	130	4298	3780	1638	58	66	36	100	99	0	2221	1901	818	127	135	75	96	95	0	2.025	2.098	2.112	2.185	1.329	2.080	0.976	120	613	6334	5496	1.018	4240	2094	3722	1774	0
3	21	4	"YHL050C"	"YHL050C"	15750	15660	130	26153	24906	13725	58	69	50	100	100	0	13910	12834	7258	116	123	43	100	100	0	1.892	1.954	1.917	2.070	1.296	1.944	0.979	120	697	39889	37566	0.920	26095	13794	24848	12718	0
3	1	5	"YIL086C"	"YIL086C"	11780	15860	90	177	277	272	49	50	12	88	88	0	201	310	343	80	84	20	86	76	0	1.058	0.991	0.977	0.958	2.300	0.806	0.863	52	391	249	458	0.081	128	121	228	230	0
3	2	5	"RHO3"	"YIL118W"	11960	15860	130	2553	2318	1040	52	60	59	100	97	0	2078	1896	888	86	91	29	98	96	0	1.256	1.252	1.272	1.342	1.421	1.237	0.949	120	622	4493	4076	0.328	2501	1992	2266	1810	0
3	3	5	"DNA43"	"YIL150C"	12160	15860	120	3467	3478	1756	52	58	40	100	100	0	2134	2264	1137	85	90	34	99	98	0	1.667	1.572	1.536	1.621	1.454	1.581	0.949	120	557	5464	5605	0.737	3415	2049	3426	2179	0
3	4	5	"YIL088C"	"YIL088C"	12360	15860	120	5037	4629	2045	50	53	15	100	100	0	4381	4173	1948	86	89	22	100	100	0	1.161	1.120	1.104	1.162	1.362	1.104	0.952	120	557	9282	8666	0.216	4987	4295	4579	4087	0
3	5	5	"YIL120W"	"YIL120W"	12560	15860	130	3405	3128	1380	52	55	18	100	100	0	5740	5444	2521	93	100	106	100	95	0	0.594	0.575	0.576	0.599	1.333	0.564	0.955	120	597	9000	8427	-0.752	3353	5647	3076	5351	0
3	6	5	"YIL152W"	"YIL152W"	12750	15860	130	2378	1987	1025	52	57	22	100	100	0	4502	3906	2119	91	100	105	97	93	0	0.527	0.507	0.519	0.540	1.388	0.492	0.956	120	630	6737	5750	-0.923	2326	4411	1935	3815	0
3	7	5	"YIL090W"	"YIL090W"	12960	15860	130	5663	5146	2155	52	59	40	100	100	0	4393	3857	1597	88	97	66	100	99	0	1.303	1.352	1.352	1.360	1.302	1.346	0.953	120	668	9916	8863	0.382	5611	4305	5094	3769	0
3	8	5	"YIL122W"	"YIL122W"	13160	15850	110	2817	2611	1625	52	66	102	96	92	0	2748	2618	1629	89	109	190	87	85	0	1.040	1.012	1.024	1.080	1.538	1.005	0.930	80	522	5424	5088	0.056	2765	2659	2559	2529	0
3	9	5	"IMP2'"	"YIL154C"	13360	15860	130	1399	1214	566	52	66	93	97	93	0	868	820	378	87	106	169	89	80	0	1.725	1.585	1.548	1.612	1.407	1.567	0.941	120	633	2128	1895	0.786	1347	781	1162	733	0
3	10	5	"YIL092W"	"YIL092W"	13560	15860	140	6159	5312	2295	55	59	23	100	100	0	5783	4987	2273	94	98	27	100	99	0	1.073	1.074	1.072	1.140	1.447	1.057	0.958	156	669	11793	10150	0.102	6104	5689	5257	4893	0
3	11	5	"AYR1"	"YIL124W"	13770	15860	140	2836	2429	1160	56	60	21	100	99	0	3600	3089	1467	97	114	337	92	86	0	0.794	0.793	0.794	0.797	1.338	0.788	0.969	156	626	6283	5365	-0.334	2780	3503	2373	2992	0
3	12	5	"UBP7"	"YIL156W"	13950	15860	120	4455	4109	2170	55	64	47	100	99	0	8691	7766	4312	91	118	368	92	87	0	0.512	0.528	0.518	0.545	1.333	0.514	0.962	120	535	13000	11729	-0.967	4400	8600	4054	7675	0
3	13	5	"BNA1"	"YJR025C"	14170	15870	120	1887	2239	2112	54	65	51	100	99	0	3610	3919	3020	95	108	70	100	98	0	0.521	0.571	0.551	0.573	1.388	0.624	0.931	120	556	5348	6009	-0.939	1833	3515	2185	3824	0
3	14	5	"CDC8"	"YJR057W"	14350	15860	130	3400	2933	1464	53	57	24	100	100	0	1637	1460	740	94	101	33	99	95	0	2.169	2.108	2.138	2.267	1.404	2.103	0.952	120	614	4890	4246	1.117	3347	1543	2880	1366	0
3	15	5	"GRR1"	"YJR090C"	14560	15860	130	1085	983	411	51	55	20	100	99	0	1312	1158	510	92	100	104	91	90	0	0.848	0.874	0.877	0.943	1.490	0.850	0.941	120	611	2254	1998	-0.239	1034	1220	932	1066	0
3	16	5	"YJR027W"	"YJR027W"	14760	15870	120	894	856	481	52	55	17	97	95	0	1063	979	511	99	108	110	88	82	0	0.873	0.914	0.911	0.913	1.584	0.922	0.936	120	543	1806	1684	-0.195	842	964	804	880	0
3	17	5	"PTK2"	"YJR059W"	14950	15860	130	2678	3245	2255	55	61	22	100	100	0	1847	2127	1444	117	122	30	100	100	0	1.516	1.587	1.638	1.638	1.316	1.578	0.961	120	614	4353	5200	0.600	2623	1730	3190	2010	0
3	18	5	"BUD4"	"YJR092W"	15160	15860	120	552	568	267	56	64	54	97	91	0	710	683	309	122	128	48	95	90	0	0.844	0.913	0.902	0.952	1.441	0.878	0.923	120	556	1084	1073	-0.245	496	588	512	561	0
3	19	5	"YJR029W"	"YJR029W"	15350	15860	130	4277	4481	2262	56	64	54	100	100	0	3256	3279	1717	127	137	82	100	100	0	1.349	1.404	1.378	1.497	1.369	1.386	0.943	120	612	7350	7577	0.432	4221	3129	4425	3152	0
3	20	5	"YJR061W"	"YJR061W"	15550	15860	130	579	642	346	55	63	34	99	97	0	618	681	338	121	146	389	70	23	0	1.054	1.048	1.074	1.112	1.580	0.389	0.271	120	646	1021	1147	0.076	524	497	587	560	0
3	21	5	"IME1"	"YJR094C"	15760	15860	130	2243	2170	1155	56	64	43	98	95	0	1715	1606	875	111	133	363	85	76	0	1.363	1.414	1.390	1.535	1.560	1.387	0.947	120	727	3791	3609	0.447	2187	1604	2114	1495	0
3	1	6	"GEA1"	"YJR031C"	11760	16060	130	1293	1269	723	50	53	16	98	96	0	1221	1179	634	81	85	23	94	93	0	1.090	1.110	1.128	1.150	1.540	1.136	0.924	120	730	2383	2317	0.125	1243	1140	1219	1098	0
3	2	6	"RPA12"	"YJR063W"	11970	16060	150	1091	1171	766	52	59	55	95	94	0	771	844	555	85	91	49	94	89	0	1.515	1.474	1.529	1.615	1.670	1.454	0.909	156	708	1725	1878	0.599	1039	686	1119	759	0
3	3	6	"SFC1"	"YJR095W"	12160	16050	130	862	931	602	52	59	59	97	95	0	653	763	473	85	90	25	97	95	0	1.426	1.296	1.257	1.315	1.525	1.293	0.902	120	592	1378	1557	0.512	810	568	879	678	0
3	4	6	"YKR020W"	"YKR020W"	12370	16060	120	1484	1461	939	50	53	15	100	100	0	811	798	491	84	139	874	40	1	0	1.972	1.976	2.000	2.090	1.669	1.013	0.221	120	558	2161	2125	0.980	1434	727	1411	714	0
3	5	6	"MRS4"	"YKR052C"	12560	16060	130	453	595	461	49	52	14	98	97	0	1164	1407	1081	84	141	851	55	34	0	0.374	0.413	0.404	0.416	1.823	0.404	0.899	120	594	1484	1869	-1.419	404	1080	546	1323	0
3	6	6	"HBS1"	"YKR084C"	12770	16060	130	2351	2180	1124	50	53	16	100	100	0	2638	2439	1310	86	94	88	93	90	0	0.902	0.905	0.909	0.978	1.563	0.890	0.937	120	612	4853	4483	-0.149	2301	2552	2130	2353	0
3	7	6	"YKR022C"	"YKR022C"	12970	16060	130	2041	2123	1614	49	54	22	100	100	0	2704	2732	2024	84	91	36	100	99	0	0.760	0.783	0.770	0.782	1.607	0.782	0.923	120	671	4612	4722	-0.395	1992	2620	2074	2648	0
3	8	6	"DYN1"	"YKR054C"	13170	16050	90	319	390	275	51	60	42	92	84	0	477	492	301	88	98	53	84	78	0	0.689	0.839	0.839	0.941	1.942	0.880	0.789	52	400	657	743	-0.538	268	389	339	404	0
3	9	6	"PRP16"	"YKR086W"	13360	16060	120	815	825	578	52	56	27	96	93	0	1040	1099	762	82	87	33	93	91	0	0.796	0.760	0.734	0.771	1.715	0.751	0.917	120	576	1721	1790	-0.328	763	958	773	1017	0
3	10	6	"DBP7"	"YKR024C"	13560	16060	120	465	524	394	54	59	29	95	85	0	1135	1238	874	88	94	36	95	92	0	0.393	0.409	0.381	0.389	1.796	0.412	0.892	120	555	1458	1620	-1.349	411	1047	470	1150	0
3	11	6	"RNC1"	"YKR056W"	13770	16060	120	1429	1329	803	53	58	26	100	97	0	872	853	490	89	109	363	77	56	0	1.757	1.670	1.605	1.770	1.765	1.693	0.913	120	541	2159	2040	0.813	1376	783	1276	764	0
3	12	6	"YKR088C"	"YKR088C"	13960	16060	130	457	582	455	52	59	45	92	89	0	677	806	614	87	111	349	65	43	0	0.686	0.737	0.721	0.829	1.888	0.461	0.507	120	598	995	1249	-0.543	405	590	530	719	0
3	13	6	"GCN3"	"YKR026C"	14160	16060	120	4397	3940	1661	50	60	49	100	100	0	2938	2768	2396	89	99	67	97	95	0	1.526	1.452	1.603	1.681	1.669	1.183	0.546	120	557	7196	6569	0.610	4347	2849	3890	2679	0
3	14	6	"GLG1"	"YKR058W"	14370	16070	130	2607	2325	1340	49	53	22	100	100	0	1588	1402	843	89	92	26	97	94	0	1.706	1.733	1.761	1.999	1.751	1.704	0.932	120	615	4057	3589	0.771	2558	1499	2276	1313	0
3	15	6	"YKR090W"	"YKR090W"	14560	16060	120	848	796	436	50	54	19	96	94	0	826	829	470	89	92	24	91	90	0	1.083	1.008	0.962	1.048	1.650	0.977	0.898	120	542	1535	1486	0.115	798	737	746	740	0
3	16	6	"YLR231C"	"YLR231C"	14760	16060	130	4214	3561	1662	53	58	24	100	100	0	2620	2307	1078	96	102	34	100	100	0	1.649	1.587	1.583	1.605	1.404	1.587	0.946	120	596	6685	5719	0.721	4161	2524	3508	2211	0
3	17	6	"RED1"	"YLR263W"	14960	16060	120	2970	2807	1401	56	61	28	100	100	0	2041	1861	963	108	114	33	98	95	0	1.508	1.569	1.524	1.685	1.528	1.551	0.932	120	559	4847	4504	0.592	2914	1933	2751	1753	0
3	18	6	"YLR294C"	"YLR294C"	15160	16070	120	1398	1235	509	57	63	27	100	98	0	709	665	235	119	140	372	79	19	0	2.273	2.158	2.205	2.185	1.567	1.400	0.259	120	555	1931	1724	1.185	1341	590	1178	546	0
3	19	6	"EST1"	"YLR233C"	15360	16070	130	4543	4046	2155	56	60	24	100	100	0	1937	1718	883	122	126	32	100	98	0	2.472	2.500	2.441	2.509	1.491	2.543	0.937	120	640	6302	5586	1.306	4487	1815	3990	1596	0
3	20	6	"YLR265C"	"YLR265C"	15580	16070	130	2926	2550	1217	55	60	25	100	100	0	3753	3333	1658	116	137	389	91	88	0	0.789	0.776	0.761	0.813	1.579	0.750	0.927	120	630	6508	5712	-0.341	2871	3637	2495	3217	0
3	21	6	"YLR296W"	"YLR296W"	15760	16070	120	765	679	317	54	60	25	100	97	0	376	354	140	107	130	397	11	0	0	2.643	2.530	2.561	2.661	1.645	2.610	0.820	120	607	980	872	1.402	711	269	625	247	0
3	1	7	"YLR235C"	"YLR235C"	11770	16260	130	1573	1391	646	51	55	18	100	98	0	1485	1306	630	84	89	49	95	91	0	1.086	1.097	1.105	1.187	1.520	1.089	0.947	120	695	2923	2562	0.120	1522	1401	1340	1222	0
3	2	7	"BOP2"	"YLR267W"	11970	16260	130	4170	3632	1541	52	57	22	100	100	0	2494	2252	973	87	94	55	100	95	0	1.711	1.654	1.640	1.707	1.346	1.657	0.961	120	594	6525	5745	0.775	4118	2407	3580	2165	0
3	3	7	"YHC1"	"YLR298C"	12170	16260	130	3005	2584	1297	53	60	35	99	97	0	1052	937	465	89	94	31	91	86	0	3.065	2.985	3.002	3.232	1.424	3.013	0.950	120	629	3915	3379	1.616	2952	963	2531	848	0
3	4	7	"THI7"	"YLR237W"	12370	16260	130	5505	5233	2210	52	58	31	100	100	0	4314	4049	1767	85	142	874	90	85	0	1.289	1.307	1.316	1.324	1.283	1.210	0.776	120	558	9682	9145	0.367	5453	4229	5181	3964	0
3	5	7	"YLR269C"	"YLR269C"	12560	16260	140	2349	1977	912	50	53	17	100	99	0	1264	1090	502	85	139	847	67	0	0	1.950	1.917	1.914	2.068	1.593	1.910	0.959	156	596	3478	2932	0.963	2299	1179	1927	1005	0
3	6	7	"EXG1"	"YLR300W"	12760	16260	140	5026	4426	1933	50	54	21	100	100	0	3649	3196	1473	87	96	76	98	95	0	1.397	1.408	1.415	1.456	1.481	1.394	0.972	156	653	8538	7485	0.482	4976	3562	4376	3109	0
3	7	7	"MVP1"	"YMR004W"	12970	16260	110	671	724	536	51	57	25	97	90	0	1462	1502	1120	85	95	46	92	85	0	0.450	0.475	0.486	0.534	1.660	0.461	0.944	80	499	1997	2090	-1.151	620	1377	673	1417	0
3	8	7	"IMP2"	"YMR035W"	13170	16260	130	641	647	386	51	57	26	96	92	0	1040	1096	666	84	93	33	94	93	0	0.617	0.589	0.588	0.634	1.735	0.575	0.921	120	630	1546	1608	-0.696	590	956	596	1012	0
3	9	7	"SOV1"	"YMR066W"	13360	16260	130	792	744	351	51	55	26	98	95	0	1478	1409	706	82	87	33	97	96	0	0.531	0.522	0.515	0.555	1.555	0.504	0.927	120	590	2137	2020	-0.914	741	1396	693	1327	0
3	10	7	"PLB2"	"YMR006C"	13570	16260	120	979	1085	798	52	56	25	100	95	0	3113	3191	2350	88	91	32	100	100	0	0.306	0.333	0.327	0.326	1.464	0.330	0.952	120	541	3952	4136	-1.706	927	3025	1033	3103	0
3	11	7	"MSN2"	"YMR037C"	13760	16260	130	2201	2069	1166	52	56	21	99	99	0	1572	1438	808	89	91	25	95	92	0	1.449	1.495	1.491	1.602	1.474	1.488	0.958	120	595	3632	3366	0.535	2149	1483	2017	1349	0
3	12	7	"YMR068W"	"YMR068W"	13970	16260	130	1405	1276	664	51	55	20	99	96	0	833	807	442	86	90	25	90	88	0	1.813	1.699	1.713	1.980	1.882	1.685	0.941	120	598	2101	1946	0.858	1354	747	1225	721	0
3	13	7	"PLB1"	"YMR008C"	14160	16260	120	7479	6559	3425	53	58	24	100	100	0	5336	4894	2616	91	96	29	100	100	0	1.416	1.355	1.364	1.386	1.322	1.347	0.964	120	543	12671	11309	0.502	7426	5245	6506	4803	0
3	14	7	"SUB1"	"YMR039C"	14360	16260	130	4841	4416	2019	53	59	26	100	100	0	2041	1910	889	91	96	26	99	95	0	2.455	2.399	2.410	2.570	1.387	2.423	0.958	120	579	6738	6182	1.296	4788	1950	4363	1819	0
3	15	7	"MOT3"	"YMR070W"	14560	16260	130	3232	3519	2135	54	60	28	100	100	0	2194	2240	1352	91	97	30	100	98	0	1.511	1.612	1.608	1.695	1.443	1.623	0.957	120	600	5281	5614	0.596	3178	2103	3465	2149	0
3	16	7	"YMR010W"	"YMR010W"	14760	16260	130	3650	3219	1869	54	62	30	100	100	0	2311	2126	1197	98	107	40	100	99	0	1.625	1.561	1.550	1.565	1.377	1.585	0.953	120	569	5809	5193	0.700	3596	2213	3165	2028	0
3	17	7	"YMR041C"	"YMR041C"	14950	16260	130	5217	4376	2216	56	73	82	100	99	0	3121	2573	1255	108	122	70	99	95	0	1.713	1.753	1.733	1.745	1.301	1.766	0.967	120	575	8174	6785	0.776	5161	3013	4320	2465	0
3	18	7	"ABF2"	"YMR072W"	15160	16270	140	1817	1598	768	58	73	79	97	94	0	1555	1375	641	117	143	362	84	76	0	1.223	1.224	1.197	1.267	1.625	1.082	0.714	156	601	3197	2798	0.291	1759	1438	1540	1258	0
3	19	7	"YNL046W"	"YNL046W"	15360	16270	140	3117	3095	2189	56	61	21	99	96	0	1490	1435	972	118	121	29	98	96	0	2.231	2.308	2.340	2.291	1.747	2.369	0.900	156	601	4433	4356	1.158	3061	1372	3039	1317	0
3	20	7	"TPM1"	"YNL079C"	15560	16270	130	6008	5327	2258	56	63	33	100	100	0	2671	2355	997	115	119	30	100	100	0	2.329	2.353	2.338	2.397	1.366	2.362	0.961	120	597	8508	7511	1.219	5952	2556	5271	2240	0
3	21	7	"CYB5"	"YNL111C"	15770	16270	120	1695	1452	764	55	63	33	96	95	0	1453	1286	685	109	113	30	95	90	0	1.220	1.187	1.187	1.270	1.606	1.168	0.936	120	613	2984	2574	0.287	1640	1344	1397	1177	0
3	1	8	"ALG11"	"YNL048W"	11770	16460	130	5053	4776	1813	53	55	17	100	100	0	5713	5393	2283	87	91	24	100	100	0	0.889	0.890	0.885	0.927	1.210	0.866	0.971	120	675	10626	10029	-0.170	5000	5626	4723	5306	0
3	2	8	"YNL081C"	"YNL081C"	11970	16460	130	1199	998	557	53	57	22	96	94	0	3027	2619	1571	88	93	32	100	98	0	0.390	0.373	0.373	0.380	1.451	0.358	0.969	120	557	4085	3476	-1.359	1146	2939	945	2531	0
3	3	8	"RPC19"	"YNL113W"	12160	16460	130	2103	1826	1020	53	60	34	99	98	0	1320	1157	641	87	92	32	96	90	0	1.663	1.657	1.675	1.780	1.451	1.641	0.963	120	596	3283	2843	0.733	2050	1233	1773	1070	0
3	4	8	"YNL050C"	"YNL050C"	12380	16460	140	3169	2656	1148	53	58	29	100	99	0	5566	4731	2123	86	91	26	100	100	0	0.569	0.560	0.563	0.572	1.268	0.550	0.969	156	603	8596	7248	-0.814	3116	5480	2603	4645	0
3	5	8	"YNL083W"	"YNL083W"	12570	16450	130	4507	3828	1750	52	58	29	100	100	0	3285	2770	1320	88	94	30	100	98	0	1.393	1.408	1.448	1.493	1.279	1.417	0.966	120	517	7652	6458	0.479	4455	3197	3776	2682	0
3	6	8	"YNL115C"	"YNL115C"	12780	16460	140	3938	3278	1662	52	58	29	100	99	0	7022	5834	3150	91	96	34	100	100	0	0.561	0.562	0.556	0.586	1.316	0.545	0.975	156	550	10817	8969	-0.835	3886	6931	3226	5743	0
3	7	8	"COX5A"	"YNL052W"	12960	16460	140	1603	1357	647	53	60	29	98	96	0	1548	1308	649	92	98	36	93	88	0	1.065	1.072	1.070	1.219	1.706	1.052	0.965	156	600	3006	2520	0.090	1550	1456	1304	1216	0
3	8	8	"MKT1"	"YNL085W"	13170	16450	150	3581	3101	1431	52	57	22	100	100	0	3656	3387	1645	88	95	32	100	100	0	0.989	0.924	0.920	0.975	1.278	0.910	0.973	156	637	7097	6348	-0.016	3529	3568	3049	3299	0
3	9	8	"MLS1"	"YNL117W"	13370	16460	140	3410	2967	1320	51	55	17	100	100	0	1627	1423	660	83	88	39	97	93	0	2.176	2.176	2.202	2.343	1.473	2.160	0.958	156	592	4903	4256	1.121	3359	1544	2916	1340	0
3	10	8	"YOL015W"	"YOL015W"	13570	16460	140	717	698	414	52	56	17	96	92	0	1114	1063	665	86	91	39	90	87	0	0.647	0.661	0.681	0.724	1.585	0.637	0.961	156	573	1693	1623	-0.628	665	1028	646	977	0
3	11	8	"YOL047C"	"YOL047C"	13770	16460	140	2534	2120	987	53	56	18	100	99	0	1797	1488	725	87	90	24	96	94	0	1.451	1.475	1.477	1.646	1.563	1.448	0.969	156	591	4191	3468	0.537	2481	1710	2067	1401	0
3	12	8	"YOL079W"	"YOL079W"	13960	16450	120	285	294	186	53	57	19	85	81	0	304	320	206	86	90	24	77	71	0	1.064	1.030	0.971	1.027	1.898	0.955	0.897	120	525	450	475	0.090	232	218	241	234	0
3	13	8	"YOL017W"	"YOL017W"	14170	16460	130	5637	4966	1851	54	61	26	100	100	0	8554	7450	2989	96	103	41	100	100	0	0.660	0.668	0.664	0.692	1.193	0.656	0.978	120	593	14041	12266	-0.599	5583	8458	4912	7354	0
3	14	8	"GSH2"	"YOL049W"	14370	16460	140	1135	1039	479	55	63	31	96	93	0	1837	1718	818	97	112	209	90	85	0	0.621	0.607	0.613	0.660	1.535	0.563	0.889	156	674	2820	2605	-0.688	1080	1740	984	1621	0
3	15	8	"IRA2"	"YOL081W"	14590	16450	130	300	396	265	55	60	23	94	92	0	383	501	342	95	99	28	91	89	0	0.851	0.840	0.857	0.921	1.560	0.798	0.919	120	566	533	747	-0.233	245	288	341	406	0
3	16	8	"YOL019W"	"YOL019W"	14770	16460	140	6160	5106	2381	54	60	24	100	100	0	5652	4768	2339	100	105	31	100	100	0	1.100	1.082	1.081	1.115	1.245	1.064	0.978	156	584	11658	9720	0.137	6106	5552	5052	4668	0
3	17	8	"GAL11"	"YOL051W"	14970	16460	140	7504	6926	3914	55	71	82	100	100	0	5323	4603	2667	107	119	68	99	98	0	1.428	1.528	1.538	1.584	1.285	1.512	0.981	156	567	12665	11367	0.514	7449	5216	6871	4496	0
3	18	8	"YOL083W"	"YOL083W"	15170	16460	140	5101	4065	2275	57	72	91	100	94	0	2893	2300	1272	116	128	70	96	91	0	1.816	1.835	1.831	1.921	1.382	1.824	0.973	156	544	7821	6192	0.861	5044	2777	4008	2184	0
3	19	8	"DIS3"	"YOL021C"	15360	16460	130	7601	6708	2970	55	63	29	100	100	0	6020	5190	2419	119	124	33	100	100	0	1.279	1.312	1.284	1.370	1.208	1.277	0.968	120	506	13447	11724	0.355	7546	5901	6653	5071	0
3	20	8	"YOL053C-A"	"YOL053C-A"	15550	16460	130	1305	1141	565	56	65	38	100	98	0	1222	1036	510	115	121	34	97	93	0	1.128	1.178	1.197	1.288	1.371	1.161	0.963	120	572	2356	2006	0.174	1249	1107	1085	921	0
3	21	8	"YOL085C"	"YOL085C"	15760	16460	130	583	506	258	56	156	1961	0	0	0	362	325	139	109	116	64	81	74	0	2.083	2.083	2.125	2.025	1.537	2.051	0.837	120	677	780	666	1.059	527	253	450	216	0
3	1	9	"KIN4"	"YOR233W"	11760	16650	130	789	765	331	50	52	14	99	98	0	1666	1567	734	85	89	26	99	99	0	0.467	0.482	0.489	0.524	1.647	0.465	0.928	120	651	2320	2197	-1.097	739	1581	715	1482	0
3	2	9	"RBL2"	"YOR265W"	11960	16650	150	1284	1170	518	51	55	18	98	97	0	1445	1245	608	89	93	29	92	91	0	0.909	0.968	0.957	1.127	1.833	0.930	0.943	156	617	2589	2275	-0.137	1233	1356	1119	1156	0
3	3	9	"TIM18"	"YOR297C"	12150	16650	130	1225	1082	490	52	57	24	99	99	0	1258	1111	530	88	95	42	96	94	0	1.003	1.007	1.033	1.130	1.612	0.987	0.934	120	546	2343	2053	0.004	1173	1170	1030	1023	0
3	4	9	"SNR17A"	"YOR235W"	12360	16650	150	1089	983	530	51	56	22	98	93	0	1229	1067	598	87	94	42	89	86	0	0.909	0.951	0.950	1.090	1.747	0.924	0.945	156	662	2180	1912	-0.138	1038	1142	932	980	0
3	5	9	"YOR267C"	"YOR267C"	12560	16650	140	4836	4858	2496	52	58	28	100	100	0	4238	4022	2138	86	93	36	100	99	0	1.152	1.221	1.180	1.289	1.524	1.210	0.946	156	625	8936	8742	0.204	4784	4152	4806	3936	0
3	6	9	"BUD7"	"YOR299W"	12760	16650	140	852	788	375	51	57	27	97	93	0	868	794	392	83	88	29	93	88	0	1.020	1.037	1.048	1.155	1.686	1.019	0.928	156	617	1586	1448	0.029	801	785	737	711	0
3	7	9	"HES1"	"YOR237W"	12950	16650	130	2191	2013	996	54	64	55	100	95	0	1849	1652	890	89	99	73	92	90	0	1.214	1.253	1.252	1.450	1.761	1.222	0.945	120	519	3897	3522	0.280	2137	1760	1959	1563	0
3	8	9	"PAC1"	"YOR269W"	13170	16660	140	2882	2477	1399	53	63	50	100	99	0	5115	4385	2606	91	100	66	99	97	0	0.563	0.565	0.586	0.612	1.592	0.547	0.956	156	675	7853	6718	-0.829	2829	5024	2424	4294	0
3	9	9	"RAX1"	"YOR301W"	13350	16650	130	489	540	327	52	58	24	94	92	0	467	457	282	85	91	43	82	79	0	1.144	1.312	1.364	1.571	2.167	1.271	0.871	120	516	819	860	0.194	437	382	488	372	0
3	10	9	"YOR239W"	"YOR239W"	13570	16650	140	1090	1523	1334	54	60	26	98	95	0	1049	1397	1188	85	91	40	93	86	0	1.075	1.120	1.143	1.235	1.782	1.119	0.946	156	574	2000	2781	0.104	1036	964	1469	1312	0
3	11	9	"YOR271C"	"YOR271C"	13760	16660	140	905	866	417	53	58	23	100	99	0	492	492	224	85	88	26	94	91	0	2.093	1.998	1.958	2.146	1.576	1.987	0.930	156	619	1259	1220	1.066	852	407	813	407	0
3	12	9	"CPA1"	"YOR303W"	13970	16660	140	2128	2136	1101	52	56	18	100	100	0	1193	1139	576	84	88	36	95	92	0	1.872	1.975	1.971	2.103	1.693	1.981	0.945	156	628	3185	3139	0.905	2076	1109	2084	1055	0
3	13	9	"YPL222W"	"YPL222W"	14160	16660	140	2758	2422	1406	53	59	24	100	100	0	1325	1206	718	90	110	228	79	75	0	2.190	2.123	2.094	2.514	2.074	2.102	0.950	156	570	3940	3485	1.131	2705	1235	2369	1116	0
3	14	9	"HFI1"	"YPL254W"	14370	16660	140	2701	2286	1069	54	60	26	99	99	0	5059	4176	2073	98	115	228	92	89	0	0.534	0.547	0.542	0.573	1.678	0.529	0.947	156	563	7608	6310	-0.906	2647	4961	2232	4078	0
3	15	9	"YPR003C"	"YPR003C"	14560	16660	130	2591	2280	1243	55	59	22	100	99	0	6977	6148	3486	100	105	31	100	100	0	0.369	0.368	0.366	0.383	1.429	0.350	0.954	120	540	9413	8273	-1.439	2536	6877	2225	6048	0
3	16	9	"MMT2"	"YPL224C"	14760	16660	140	3695	3059	1711	54	58	19	100	99	0	3692	3220	1891	100	104	31	98	95	0	1.014	0.963	0.960	1.061	1.646	0.944	0.953	156	598	7233	6125	0.020	3641	3592	3005	3120	0
3	17	9	"CLN2"	"YPL256C"	14970	16660	140	5663	4754	2283	54	58	19	100	100	0	3730	3136	1579	103	106	27	99	99	0	1.546	1.550	1.559	1.661	1.623	1.525	0.949	156	554	9236	7733	0.629	5609	3627	4700	3033	0
3	18	9	"HAL1"	"YPR005C"	15150	16650	130	4577	3797	2085	58	97	215	95	89	0	4788	3884	2175	115	163	279	86	85	0	0.967	0.992	0.996	1.069	1.363	0.968	0.966	120	528	9192	7508	-0.048	4519	4673	3739	3769	0
3	19	9	"YPL226W"	"YPL226W"	15370	16660	140	5681	5242	2548	57	92	198	99	99	0	6197	5355	2744	121	161	255	98	96	0	0.926	0.991	0.996	1.045	1.501	0.973	0.955	156	634	11700	10419	-0.112	5624	6076	5185	5234	0
3	20	9	"THI21"	"YPL258C"	15570	16660	140	4141	3538	1635	55	62	29	100	100	0	3531	3048	1459	114	120	31	99	99	0	1.196	1.187	1.181	1.273	1.530	1.172	0.957	156	611	7503	6417	0.258	4086	3417	3483	2934	0
3	21	9	"SPO69"	"YPR007C"	15770	16660	140	4447	3899	1953	54	59	24	100	99	0	2015	1698	809	108	112	25	100	97	0	2.304	2.418	2.472	2.451	1.621	2.470	0.946	156	752	6300	5435	1.204	4393	1907	3845	1590	0
3	1	10	"CET1"	"YPL228W"	11780	16860	140	4646	3943	1915	49	52	16	100	100	0	5643	4892	2421	85	88	23	100	100	0	0.827	0.810	0.814	0.826	1.730	0.801	0.916	156	737	10155	8701	-0.274	4597	5558	3894	4807	0
3	2	10	"YPL260W"	"YPL260W"	11980	16850	140	4609	3752	1977	50	55	20	100	99	0	6642	5748	3153	89	94	30	100	100	0	0.696	0.654	0.642	0.668	1.913	0.633	0.912	156	550	11112	9361	-0.523	4559	6553	3702	5659	0
3	3	10	"YPR009W"	"YPR009W"	12170	16860	140	1710	1394	784	51	56	23	98	94	0	4593	3713	2024	91	99	43	99	99	0	0.369	0.371	0.371	0.355	1.719	0.370	0.927	156	637	6161	4965	-1.440	1659	4502	1343	3622	0
3	4	10	"LTE1"	"YAL024C"	12390	16850	120	250	315	213	51	55	20	92	90	0	592	669	458	86	93	36	95	91	0	0.393	0.453	0.419	0.459	2.236	0.421	0.771	120	591	705	847	-1.346	199	506	264	583	0
3	5	10	"PEP1"	"YBL017C"	12580	16850	90	131	198	190	51	55	19	78	67	0	241	283	216	84	92	53	65	63	0	0.510	0.739	0.648	0.655	2.564	0.794	0.752	52	387	237	346	-0.973	80	157	147	199	-100
3	6	10	"ENA2"	"YDR039C"	12790	16850	90	123	267	339	50	52	15	84	76	0	158	335	409	79	82	24	69	53	0	0.924	0.848	0.896	0.859	2.664	0.815	0.784	52	354	152	473	-0.114	73	79	217	256	-100
3	7	10	"YFL019C"	"YFL019C"	12960	16850	150	72	143	183	51	58	44	31	22	0	114	189	234	86	96	91	21	14	0	0.750	0.893	0.821	0.757	2.881	0.614	0.572	156	759	49	195	-0.415	21	28	92	103	-100
3	8	10	"YGL066W"	"YGL066W"	13180	16860	90	212	377	385	52	57	24	86	75	0	280	439	430	88	90	21	78	71	0	0.833	0.926	1.018	0.918	2.313	0.933	0.690	52	357	352	676	-0.263	160	192	325	351	-100
3	9	10	"MNT2"	"YGL257C"	13360	16850	150	69	144	218	52	56	21	44	29	0	113	195	252	84	88	25	51	33	0	0.586	0.829	0.795	0.688	3.664	0.828	0.658	156	686	46	203	-0.771	17	29	92	111	-100
3	10	10	"YHR032W"	"YHR032W"	13560	16850	150	61	126	170	52	57	24	35	26	0	101	159	169	84	89	27	40	26	0	0.529	0.987	0.849	0.782	2.783	1.002	0.745	156	741	26	149	-0.918	9	17	74	75	-100
3	11	10	"YHR036W"	"YHR036W"	13800	16850	90	170	265	251	51	55	20	90	75	0	188	284	276	81	85	26	80	67	0	1.112	1.054	0.931	1.011	2.593	0.913	0.619	52	391	226	417	0.153	119	107	214	203	-100
3	12	10	"YHR045W"	"YHR045W"	13980	16840	90	141	220	215	50	54	17	88	76	0	162	259	248	80	86	45	67	46	0	1.110	0.950	0.883	1.057	2.448	0.861	0.780	52	344	173	349	0.150	91	82	170	179	-100
3	13	10	"STT4"	"YLR305C"	14160	16850	150	59	90	98	51	55	18	32	19	0	96	132	136	83	89	38	26	14	0	0.615	0.796	0.613	0.623	3.877	0.662	0.579	156	613	21	88	-0.700	8	13	39	49	-100
3	14	10	"YLR422W"	"YLR422W"	14360	16850	150	62	102	127	52	54	17	36	26	0	100	138	140	87	94	57	20	10	0	0.769	0.980	0.663	0.610	3.963	0.862	0.442	156	581	23	101	-0.379	10	13	50	51	-100
3	15	10	"YML072C"	"YML072C"	14560	16850	150	62	90	95	52	55	18	35	17	0	94	127	126	90	99	59	14	8	0	2.500	1.027	0.750	0.830	3.852	0.487	0.306	156	620	14	75	1.322	10	4	38	37	-100
3	16	10	"SNR54"	"SNR54"	14780	16860	140	214	205	86	52	55	18	90	87	0	447	448	381	89	95	26	89	85	0	0.453	0.426	0.455	0.489	2.237	0.222	0.425	156	583	520	512	-1.144	162	358	153	359	0
3	17	10	"YMR046W-A"	"YMR046W-A"	14970	16860	140	3363	3002	1602	53	58	21	100	100	0	4553	4012	2080	101	104	29	100	100	0	0.743	0.754	0.756	0.745	1.559	0.751	0.884	156	536	7762	6860	-0.428	3310	4452	2949	3911	0
3	18	10	"YMRWdelta16"	"YMRWdelta16"	15170	16860	140	959	841	447	57	86	190	82	77	0	1337	1179	648	112	149	260	82	72	0	0.736	0.735	0.744	0.762	1.639	0.704	0.885	156	592	2127	1851	-0.442	902	1225	784	1067	0
3	19	10	"YNRCdelta9"	"YNRCdelta9"	15370	16860	140	565	511	253	55	64	44	90	85	0	771	664	312	118	126	48	89	84	0	0.781	0.835	0.849	0.887	1.876	0.820	0.881	156	578	1163	1002	-0.357	510	653	456	546	0
3	20	10	"SNR50"	"SNR50"	15570	16860	130	275	274	111	55	59	20	100	97	0	322	316	123	116	119	27	90	87	0	1.068	1.095	1.061	1.124	1.568	1.048	0.822	120	540	426	419	0.095	220	206	219	200	0
3	21	10	"tR(ACG)O"	"tR(ACG)O"	15770	16860	140	186	203	111	55	61	29	91	78	0	275	289	128	110	113	31	87	80	0	0.794	0.827	0.792	0.807	2.135	0.837	0.733	156	755	296	327	-0.333	131	165	148	179	0
3	1	11	"YPLCdelta1"	"YPLCdelta1"	11780	17060	140	1017	911	461	49	53	17	100	98	0	1321	1162	599	82	90	126	87	82	0	0.781	0.798	0.786	0.863	1.678	0.757	0.869	156	728	2207	1942	-0.356	968	1239	862	1080	0
3	2	11	"YPL183W-A"	"YPL183W-A"	11980	17050	140	692	629	329	51	55	20	97	93	0	741	656	363	88	100	143	78	71	0	0.982	1.018	1.029	1.139	1.864	0.984	0.898	156	568	1294	1146	-0.027	641	653	578	568	0
3	3	11	"IntYPL143W"	"IntYPL143W"	12180	17060	150	1885	1662	887	51	54	17	99	99	0	3324	2897	1608	90	93	29	98	98	0	0.567	0.574	0.579	0.615	1.620	0.562	0.943	156	610	5068	4418	-0.818	1834	3234	1611	2807	0
3	4	11	"tC(GCA)P2"	"tC(GCA)P2"	12380	17060	130	227	240	127	51	54	17	93	88	0	376	357	193	86	90	29	84	82	0	0.607	0.697	0.695	0.733	1.747	0.650	0.850	120	593	466	460	-0.720	176	290	189	271	0
3	5	11	"tN(GUU)P"	"tN(GUU)P"	12580	17050	130	7027	6272	3553	52	64	88	100	96	0	4871	4226	2499	86	97	63	100	95	0	1.458	1.502	1.489	1.584	1.473	1.525	0.938	120	646	11760	10360	0.544	6975	4785	6220	4140	0
3	6	11	"tI(AAU)P2"	"tI(AAU)P2"	12790	17060	140	641	607	347	50	61	87	83	78	0	768	689	397	82	91	61	82	79	0	0.862	0.918	0.906	0.974	1.711	0.904	0.910	156	646	1277	1164	-0.215	591	686	557	607	0
3	7	11	"itL(UAA)B2"	"itL(UAA)B2"	12970	17050	130	505	463	225	51	57	29	90	86	0	558	500	249	87	96	86	80	78	0	0.964	0.998	0.962	1.058	1.665	0.887	0.807	120	538	925	825	-0.053	454	471	412	413	0
3	8	11	"iYBR057C"	"iYBR057C"	13180	17060	140	5650	4991	2565	52	57	27	100	100	0	5217	4612	2452	90	98	77	100	96	0	1.092	1.092	1.096	1.140	1.473	1.091	0.936	156	687	10725	9461	0.127	5598	5127	4939	4522	0
3	9	11	"iYBR060C-1"	"iYBR060C-1"	13370	17060	130	250	318	222	51	53	15	96	90	0	347	411	299	81	86	24	86	85	0	0.748	0.809	0.801	0.814	1.890	0.762	0.868	120	555	465	597	-0.419	199	266	267	330	0
3	10	11	"iYBR077C"	"iYBR077C"	13580	17060	140	1174	1140	545	52	55	18	99	98	0	956	888	400	83	87	24	95	94	0	1.285	1.352	1.355	1.339	1.540	1.362	0.939	156	637	1995	1893	0.362	1122	873	1088	805	0
3	11	11	"iYBR081C"	"iYBR081C"	13770	17060	140	1131	1002	491	50	54	16	100	98	0	599	541	255	84	87	23	91	89	0	2.099	2.083	2.022	2.136	1.740	2.094	0.910	156	672	1596	1409	1.070	1081	515	952	457	0
3	12	11	"iYBR083W"	"iYBR083W"	13980	17060	140	1159	1121	597	50	54	17	100	98	0	833	785	418	83	86	22	94	91	0	1.479	1.526	1.502	1.709	1.914	1.517	0.922	156	647	1859	1773	0.564	1109	750	1071	702	0
3	13	11	"iYBR097W"	"iYBR097W"	14170	17060	140	535	478	248	51	56	31	92	87	0	690	630	341	84	89	58	85	80	0	0.799	0.782	0.786	0.843	1.902	0.743	0.879	156	586	1090	973	-0.324	484	606	427	546	0
3	14	11	"iYBR103W"	"iYBR103W"	14380	17060	140	1027	955	443	50	55	31	100	97	0	1310	1184	558	86	93	78	96	90	0	0.798	0.824	0.818	0.872	1.487	0.795	0.916	156	586	2201	2003	-0.325	977	1224	905	1098	0
3	15	11	"iYBR107C"	"iYBR107C"	14570	17060	140	1379	1329	836	50	54	18	100	99	0	1114	1052	624	86	91	54	90	88	0	1.293	1.324	1.337	1.513	2.027	1.342	0.917	156	638	2357	2245	0.371	1329	1028	1279	966	0
3	16	11	"iYBR126C"	"iYBR126C"	14790	17060	150	1371	1208	636	51	54	16	99	98	0	1827	1529	814	86	90	31	96	95	0	0.758	0.802	0.804	0.857	1.697	0.773	0.935	156	615	3061	2600	-0.399	1320	1741	1157	1443	0
3	17	11	"iYBR130C"	"iYBR130C"	14980	17060	140	892	861	454	53	58	21	98	95	0	726	673	319	97	102	37	92	87	0	1.334	1.403	1.402	1.476	1.801	1.426	0.906	156	525	1468	1384	0.416	839	629	808	576	0
3	18	11	"iYBR135W"	"iYBR135W"	15180	17060	140	3027	2931	1918	55	62	27	100	100	0	1675	1583	1029	108	112	30	100	99	0	1.897	1.950	2.041	2.173	1.697	1.940	0.935	156	550	4539	4351	0.923	2972	1567	2876	1475	0
3	19	11	"iYDL248W-0"	"iYDL248W-0"	15380	17060	140	815	830	469	54	61	27	98	93	0	1443	1450	801	115	120	29	99	96	0	0.573	0.581	0.578	0.596	1.590	0.569	0.924	156	552	2089	2111	-0.803	761	1328	776	1335	0
3	20	11	"iYDL246C-1"	"iYDL246C-1"	15570	17060	140	868	853	366	54	59	22	100	100	0	587	615	246	115	118	26	99	98	0	1.725	1.598	1.593	1.652	1.527	1.584	0.924	156	635	1286	1299	0.786	814	472	799	500	0
3	21	11	"iYDL243C"	"iYDL243C"	15780	17060	130	1014	1031	621	54	59	24	100	99	0	1084	1100	657	110	112	30	96	93	0	0.986	0.987	0.996	1.117	1.932	0.960	0.926	120	664	1934	1967	-0.021	960	974	977	990	0
3	1	12	"iYDL227C-0"	"iYDL227C-0"	11770	17260	140	1070	994	542	49	52	18	98	97	0	1209	1132	636	79	88	131	86	82	0	0.904	0.897	0.912	1.022	1.623	0.872	0.899	156	781	2151	1998	-0.146	1021	1130	945	1053	0
3	2	12	"iYDL225W"	"iYDL225W"	12000	17260	140	831	754	397	50	55	43	95	89	0	3699	3336	1942	86	106	243	92	87	0	0.216	0.217	0.220	0.228	1.321	0.209	0.965	156	583	4394	3954	-2.210	781	3613	704	3250	0
3	3	12	"iYDL220C"	"iYDL220C"	12180	17260	140	548	518	271	50	55	44	90	85	0	837	756	406	86	101	207	79	73	0	0.663	0.699	0.713	0.752	1.750	0.679	0.957	156	543	1249	1138	-0.593	498	751	468	670	0
3	4	12	"iYDL207W"	"iYDL207W"	12390	17260	140	745	645	312	51	53	16	96	94	0	789	687	340	82	87	27	91	90	0	0.982	0.982	1.000	1.064	1.605	0.962	0.950	156	570	1401	1199	-0.027	694	707	594	605	0
3	5	12	"iYDL203C"	"iYDL203C"	12580	17260	140	658	614	331	53	66	95	86	79	0	454	419	213	88	98	57	83	77	0	1.653	1.695	1.661	1.765	1.640	1.678	0.939	156	540	971	892	0.725	605	366	561	331	0
3	6	12	"iYDL199C"	"iYDL199C"	12760	17260	140	376	367	189	52	65	94	80	73	0	249	237	103	83	92	54	81	71	0	1.952	2.045	1.974	1.791	2.153	1.545	0.382	156	544	490	469	0.965	324	166	315	154	0
3	7	12	"iYDL183C-1"	"iYDL183C-1"	12960	17260	140	2500	2224	1099	51	56	27	99	99	0	955	879	414	82	87	26	96	95	0	2.805	2.726	2.702	2.789	1.303	2.765	0.963	156	628	3322	2970	1.488	2449	873	2173	797	0
3	8	12	"iYDL179W"	"iYDL179W"	13170	17260	130	744	713	325	51	54	15	97	95	0	735	691	309	83	88	24	92	90	0	1.063	1.089	1.110	1.106	1.661	1.080	0.952	120	538	1345	1270	0.088	693	652	662	608	0
3	9	12	"iYDL175C"	"iYDL175C"	13360	17260	140	796	723	332	50	53	15	98	96	0	1764	1572	798	80	85	23	97	96	0	0.443	0.451	0.455	0.493	1.429	0.436	0.964	156	615	2430	2165	-1.175	746	1684	673	1492	0
3	10	12	"iYDR127W"	"iYDR127W"	13570	17260	120	454	440	222	50	52	15	96	95	0	391	447	814	80	83	21	90	89	0	1.299	1.063	1.318	1.291	1.694	0.194	0.125	120	494	715	757	0.377	404	311	390	367	0
3	11	12	"iYDR131C"	"iYDR131C"	13750	17260	130	566	516	231	50	55	32	94	90	0	646	602	288	83	87	32	90	88	0	0.917	0.898	0.885	0.945	1.390	0.865	0.945	120	514	1079	985	-0.126	516	563	466	519	0
3	12	12	"iYDR137W"	"iYDR137W"	13950	17260	140	478	444	229	50	55	31	92	87	0	368	339	163	83	87	41	85	80	0	1.502	1.539	1.513	1.543	1.782	1.498	0.874	156	590	713	650	0.587	428	285	394	256	0
3	13	12	"iYDR155C"	"iYDR155C"	14160	17260	140	872	812	439	51	54	29	97	92	0	534	484	248	85	90	65	84	78	0	1.829	1.907	1.935	2.041	1.537	1.880	0.933	156	566	1270	1160	0.871	821	449	761	399	0
3	14	12	"iYDR161W"	"iYDR161W"	14360	17260	140	811	765	380	50	55	30	99	94	0	1297	1216	642	86	91	58	94	91	0	0.628	0.633	0.642	0.705	1.686	0.616	0.955	156	576	1972	1845	-0.670	761	1211	715	1130	0
3	15	12	"iYDR165W"	"iYDR165W"	14560	17260	130	357	336	145	50	54	16	95	92	0	627	580	278	86	90	23	92	90	0	0.567	0.579	0.565	0.624	1.663	0.551	0.917	120	554	848	780	-0.817	307	541	286	494	0
3	16	12	"iYDR177W"	"iYDR177W"	14760	17260	130	1875	1791	904	50	52	13	100	98	0	1424	1287	651	86	90	31	92	90	0	1.364	1.450	1.453	1.595	1.532	1.448	0.960	120	564	3163	2942	0.448	1825	1338	1741	1201	0
3	17	12	"iYDR180W"	"iYDR180W"	14960	17260	140	507	492	238	51	53	17	98	96	0	1060	1000	486	93	97	33	98	96	0	0.472	0.486	0.481	0.487	1.409	0.479	0.944	156	554	1423	1348	-1.084	456	967	441	907	0
3	18	12	"iYDR184C"	"iYDR184C"	15160	17260	140	1051	1023	541	54	60	26	98	94	0	1659	1464	744	107	110	28	98	96	0	0.642	0.714	0.723	0.731	1.346	0.714	0.966	156	568	2549	2326	-0.638	997	1552	969	1357	0
3	19	12	"iYDR204W"	"iYDR204W"	15360	17260	140	1116	1010	523	54	62	29	98	93	0	512	475	206	113	117	29	90	86	0	2.662	2.641	2.705	2.706	1.421	2.674	0.932	156	586	1461	1318	1.412	1062	399	956	362	0
3	20	12	"iYDR208W"	"iYDR208W"	15560	17260	130	1344	1326	724	54	59	24	100	100	0	1210	1207	666	110	113	27	97	94	0	1.173	1.160	1.154	1.333	1.577	1.132	0.970	120	585	2390	2369	0.230	1290	1100	1272	1097	0
3	21	12	"itI(UAU)D"	"itI(UAU)D"	15780	17260	130	922	964	488	53	57	22	100	100	0	908	889	423	103	106	27	97	95	0	1.080	1.159	1.180	1.229	1.410	1.169	0.961	120	696	1674	1697	0.110	869	805	911	786	0
3	1	13	"iYDR521W"	"iYDR521W"	11770	17460	150	871	757	401	49	51	13	97	95	0	1004	845	471	77	81	51	91	85	0	0.887	0.922	0.923	1.013	1.676	0.898	0.947	156	807	1749	1476	-0.173	822	927	708	768	0
3	2	13	"iYDR525W"	"iYDR525W"	11980	17450	120	613	654	425	50	55	45	93	89	0	322	356	209	83	97	213	55	25	0	2.356	2.212	2.194	2.395	2.093	1.493	0.402	120	511	802	877	1.236	563	239	604	273	0
3	3	13	"iYDR528W"	"iYDR528W"	12170	17450	130	1014	891	512	51	56	46	93	87	0	2306	1866	1077	85	102	214	85	80	0	0.434	0.472	0.474	0.488	1.736	0.465	0.926	120	506	3184	2621	-1.206	963	2221	840	1781	0
3	4	13	"iYDR541C-0"	"iYDR541C-0"	12370	17450	150	967	1140	787	51	55	18	96	94	0	1006	1251	867	84	90	28	94	91	0	0.993	0.933	0.929	1.015	1.772	0.917	0.947	156	575	1838	2256	-0.009	916	922	1089	1167	0
3	5	13	"iYDR544C"	"iYDR544C"	12570	17460	140	21757	18521	9636	55	59	22	100	100	0	10647	8694	4683	93	98	32	100	100	0	2.056	2.147	2.131	2.146	1.532	2.144	0.961	156	529	32256	27067	1.040	21702	10554	18466	8601	0
3	6	13	"iYEL073C-0"	"iYEL073C-0"	12760	17450	130	753	638	358	53	58	31	91	88	0	789	658	355	88	94	32	88	85	0	0.999	1.026	1.031	1.044	1.788	1.037	0.940	120	544	1401	1155	-0.002	700	701	585	570	0
3	7	13	"iYEL063C"	"iYEL063C"	12980	17460	140	2215	1914	958	52	55	27	100	98	0	1725	1428	723	83	87	24	96	94	0	1.317	1.384	1.358	1.504	1.747	1.376	0.950	156	604	3805	3207	0.398	2163	1642	1862	1345	0
3	8	13	"iYEL059W"	"iYEL059W"	13170	17460	140	488	491	274	50	52	13	95	92	0	372	368	200	83	86	24	84	82	0	1.516	1.547	1.502	1.520	1.988	1.495	0.899	156	556	727	726	0.600	438	289	441	285	0
3	9	13	"iYEL055C"	"iYEL055C"	13370	17460	140	1688	1433	722	49	52	14	99	98	0	1985	1659	857	82	85	29	95	93	0	0.861	0.878	0.882	0.929	1.806	0.862	0.948	156	568	3542	2961	-0.215	1639	1903	1384	1577	0
3	10	13	"iYEL042W"	"iYEL042W"	13570	17460	140	2628	2231	1242	49	52	14	98	98	0	3277	2706	1482	83	86	27	99	94	0	0.807	0.832	0.821	0.858	1.628	0.827	0.944	156	581	5773	4805	-0.309	2579	3194	2182	2623	0
3	11	13	"iYEL038W"	"iYEL038W"	13770	17460	140	497	445	206	50	55	31	91	89	0	501	446	209	81	86	31	87	84	0	1.064	1.082	1.062	1.115	1.713	1.046	0.923	156	571	867	760	0.090	447	420	395	365	0
3	12	13	"itS(AGA)E"	"itS(AGA)E"	13970	17460	140	820	694	367	50	52	14	94	92	0	425	359	178	82	83	20	85	80	0	2.245	2.325	2.228	2.218	2.063	2.259	0.927	156	550	1113	921	1.167	770	343	644	277	0
3	13	13	"iYFL044C"	"iYFL044C"	14170	17460	140	596	510	252	50	52	14	94	91	0	592	529	264	82	84	19	87	85	0	1.071	1.029	1.002	1.061	1.634	0.998	0.921	156	556	1056	907	0.098	546	510	460	447	0
3	14	13	"iYFL039C"	"iYFL039C"	14370	17460	140	2545	2198	1226	51	54	18	100	99	0	1223	1098	591	83	87	23	93	92	0	2.188	2.115	2.075	2.230	1.712	2.145	0.944	156	561	3634	3162	1.129	2494	1140	2147	1015	0
3	15	13	"iYFL035C-A"	"iYFL035C-A"	14570	17460	140	818	774	394	51	53	16	99	97	0	1263	1204	774	89	94	58	93	91	0	0.653	0.648	0.655	0.714	1.821	0.460	0.600	156	620	1941	1838	-0.614	767	1174	723	1115	0
3	16	13	"iYFL020C"	"iYFL020C"	14790	17460	140	3146	2682	1216	48	49	10	100	100	0	5760	4812	2332	88	96	90	100	94	0	0.546	0.558	0.546	0.586	1.461	0.542	0.964	156	576	8770	7358	-0.873	3098	5672	2634	4724	0
3	17	13	"iYFL017C"	"iYFL017C"	14980	17460	140	659	630	315	48	50	13	100	99	0	1046	930	454	88	91	21	99	97	0	0.638	0.691	0.681	0.731	1.493	0.561	0.746	156	550	1569	1424	-0.649	611	958	582	842	0
3	18	13	"iYFL013W-A"	"iYFL013W-A"	15190	17470	140	1860	1779	934	51	55	18	99	98	0	1702	1564	757	99	102	26	96	95	0	1.129	1.180	1.159	1.233	1.571	1.196	0.938	156	546	3412	3193	0.174	1809	1603	1728	1465	0
3	19	13	"iYFR001W"	"iYFR001W"	15380	17470	140	926	901	467	53	58	20	100	97	0	2080	1843	941	107	112	28	100	98	0	0.442	0.488	0.495	0.511	1.505	0.480	0.945	156	538	2846	2584	-1.176	873	1973	848	1736	0
3	20	13	"iYFR005C"	"iYFR005C"	15580	17460	150	1482	1627	861	54	58	19	100	100	0	2686	2471	1016	110	113	28	99	99	0	0.554	0.666	0.617	0.669	1.469	0.688	0.877	156	626	4004	3934	-0.851	1428	2576	1573	2361	0
3	21	13	"iYFR007W"	"iYFR007W"	15770	17460	140	682	617	298	52	56	22	99	97	0	928	890	472	104	114	175	82	75	0	0.765	0.719	0.726	0.834	1.984	0.672	0.925	156	734	1454	1351	-0.387	630	824	565	786	0
3	1	14	"iYFR019W"	"iYFR019W"	11780	17650	140	360	334	156	50	53	16	94	90	0	667	582	296	77	80	23	91	88	0	0.525	0.562	0.551	0.598	1.648	0.536	0.895	156	729	900	789	-0.928	310	590	284	505	0
3	2	14	"iYFR021W"	"iYFR021W"	11980	17660	140	1374	1210	630	50	54	17	98	96	0	2741	2387	1227	83	86	24	98	97	0	0.498	0.503	0.497	0.511	1.638	0.498	0.950	156	573	3982	3464	-1.005	1324	2658	1160	2304	0
3	3	14	"iYFR025C"	"iYFR025C"	12170	17650	140	186	179	78	50	53	17	88	85	0	305	274	142	85	89	24	77	74	0	0.618	0.683	0.662	0.742	2.116	0.603	0.838	156	577	356	318	-0.694	136	220	129	189	0
3	4	14	"iYGL013C"	"iYGL013C"	12380	17650	140	2530	2020	1128	51	56	33	95	92	0	2991	2328	1352	85	92	63	93	89	0	0.853	0.878	0.862	0.937	1.672	0.858	0.961	156	566	5385	4212	-0.229	2479	2906	1969	2243	0
3	5	14	"iYGL009C"	"iYGL009C"	12580	17660	140	4062	3551	2026	53	59	35	100	99	0	3670	3098	1829	91	99	66	96	93	0	1.120	1.163	1.158	1.235	1.431	1.151	0.960	156	541	7588	6505	0.164	4009	3579	3498	3007	0
3	6	14	"iYGL006W"	"iYGL006W"	12780	17660	140	616	554	319	52	56	29	89	85	0	3461	2916	1860	90	96	31	96	94	0	0.167	0.178	0.177	0.192	1.594	0.172	0.950	156	599	3935	3328	-2.579	564	3371	502	2826	0
3	7	14	"iYGR011W"	"iYGR011W"	12980	17660	140	1773	1567	842	51	53	13	100	99	0	1488	1325	718	85	88	22	96	94	0	1.227	1.223	1.238	1.368	1.701	1.208	0.949	156	563	3125	2756	0.296	1722	1403	1516	1240	0
3	8	14	"iYGR015C"	"iYGR015C"	13180	17660	140	829	791	393	50	53	14	99	98	0	1232	1131	594	83	86	24	96	94	0	0.678	0.707	0.698	0.774	1.494	0.684	0.955	156	545	1928	1789	-0.561	779	1149	741	1048	0
3	9	14	"iYGR020C"	"iYGR020C"	13380	17660	150	1571	1436	757	49	52	13	100	97	0	1538	1388	743	82	85	29	94	92	0	1.045	1.062	1.069	1.198	1.723	1.045	0.952	156	568	2978	2693	0.064	1522	1456	1387	1306	0
3	10	14	"iYGR034W"	"iYGR034W"	13580	17660	140	1006	975	565	50	52	13	100	99	0	1643	1470	811	84	87	28	99	96	0	0.613	0.667	0.667	0.698	1.471	0.670	0.947	156	571	2515	2311	-0.706	956	1559	925	1386	0
3	11	14	"iYGR038W"	"iYGR038W"	13790	17660	140	909	792	360	51	54	15	98	96	0	1583	1342	655	84	86	21	97	95	0	0.572	0.589	0.591	0.640	1.423	0.572	0.962	156	566	2357	1999	-0.805	858	1499	741	1258	0
3	12	14	"iYGR039W"	"iYGR039W"	13980	17660	140	680	627	325	51	54	17	98	96	0	798	729	369	85	86	21	94	92	0	0.882	0.894	0.905	0.960	1.579	0.880	0.928	156	542	1342	1220	-0.181	629	713	576	644	0
3	13	14	"iYGR055W"	"iYGR055W"	14180	17660	140	1272	1184	637	50	53	17	99	98	0	1036	913	506	85	87	21	89	87	0	1.285	1.370	1.346	1.514	1.701	1.351	0.939	156	552	2173	1962	0.362	1222	951	1134	828	0
3	14	14	"iYGR059W"	"iYGR059W"	14380	17660	140	601	559	276	51	54	18	98	94	0	675	616	309	81	85	21	91	89	0	0.926	0.950	0.937	1.051	1.703	0.930	0.940	156	563	1144	1043	-0.111	550	594	508	535	0
3	15	14	"iYGR062C"	"iYGR062C"	14580	17660	140	415	392	191	50	53	16	97	94	0	535	500	249	86	92	58	87	82	0	0.813	0.826	0.820	0.883	1.617	0.724	0.805	156	582	814	756	-0.299	365	449	342	414	0
3	16	14	"iYHR001W"	"iYHR001W"	14780	17660	140	1283	1094	591	50	52	13	99	96	0	3723	3167	1907	91	99	94	94	89	0	0.339	0.339	0.335	0.375	1.473	0.325	0.961	156	528	4865	4120	-1.559	1233	3632	1044	3076	0
3	17	14	"iYHR004C"	"iYHR004C"	14970	17660	140	818	752	403	51	53	15	100	98	0	1144	1032	579	90	94	24	96	93	0	0.728	0.744	0.736	0.840	1.737	0.726	0.950	156	544	1821	1643	-0.459	767	1054	701	942	0
3	18	14	"iYHRCdelta4"	"iYHRCdelta4"	15180	17660	150	2711	2298	1157	53	57	23	100	100	0	2439	2021	1026	97	100	28	100	100	0	1.135	1.167	1.141	1.201	1.285	1.162	0.965	156	576	5000	4169	0.183	2658	2342	2245	1924	0
3	19	14	"iYHR017W"	"iYHR017W"	15380	17660	140	500	476	227	55	60	25	93	91	0	1064	937	457	108	113	31	93	91	0	0.465	0.508	0.501	0.540	1.663	0.493	0.924	156	551	1401	1250	-1.103	445	956	421	829	0
3	20	14	"iYHRCsigma2"	"iYHRCsigma2"	15570	17660	130	358	336	165	56	61	22	91	89	0	493	441	200	117	122	34	86	82	0	0.803	0.864	0.851	0.863	1.713	0.687	0.651	120	550	678	604	-0.316	302	376	280	324	0
3	21	14	"iYHR023W"	"iYHR023W"	15780	17660	140	521	481	234	54	59	21	96	92	0	1790	1559	861	116	127	173	87	84	0	0.279	0.296	0.303	0.341	1.742	0.267	0.880	156	777	2141	1870	-1.842	467	1674	427	1443	0
3	1	15	"iYHR039C"	"iYHR039C"	11790	17860	140	317	322	179	50	54	17	94	89	0	426	423	241	80	85	37	85	80	0	0.772	0.793	0.797	0.841	1.935	0.759	0.899	156	697	613	615	-0.374	267	346	272	343	0
3	2	15	"iYHR042W"	"iYHR042W"	11990	17860	140	851	733	354	51	54	18	98	96	0	992	902	447	84	88	25	94	92	0	0.881	0.834	0.820	0.887	1.667	0.817	0.939	156	515	1708	1500	-0.183	800	908	682	818	0
3	3	15	"iYHR046C"	"iYHR046C"	12180	17850	140	833	725	459	51	55	18	97	91	0	1731	1572	1138	87	92	29	92	87	0	0.476	0.454	0.451	0.557	2.104	0.418	0.922	156	553	2426	2159	-1.072	782	1644	674	1485	0
3	4	15	"iYHR060W"	"iYHR060W"	12380	17850	140	759	736	459	51	57	34	95	93	0	831	816	507	84	91	65	87	83	0	0.948	0.936	0.920	1.041	1.731	0.915	0.921	156	582	1455	1417	-0.077	708	747	685	732	0
3	5	15	"iYHR064C"	"iYHR064C"	12580	17850	140	865	774	397	51	55	20	97	92	0	485	428	208	83	87	28	87	85	0	2.025	2.096	2.018	2.095	1.536	2.058	0.925	156	557	1216	1068	1.018	814	402	723	345	0
3	6	15	"iYHR068W"	"iYHR068W"	12780	17860	140	388	343	181	50	53	15	91	87	0	611	563	312	83	88	26	87	84	0	0.640	0.610	0.592	0.643	1.763	0.584	0.920	156	570	866	773	-0.644	338	528	293	480	0
3	7	15	"iYIL023C"	"iYIL023C"	12990	17860	140	1066	938	491	51	54	15	98	97	0	580	532	266	86	88	22	91	88	0	2.055	1.989	1.987	2.058	1.791	1.990	0.922	156	576	1509	1333	1.039	1015	494	887	446	0
3	8	15	"iYIL019W"	"iYIL019W"	13190	17860	140	2265	1941	1019	52	54	14	100	97	0	2922	2489	1315	85	88	21	99	98	0	0.780	0.786	0.791	0.819	1.553	0.779	0.956	156	556	5050	4293	-0.358	2213	2837	1889	2404	0
3	9	15	"iYIL015W"	"iYIL015W"	13390	17860	150	438	405	193	51	54	14	94	94	0	565	501	246	84	89	44	87	83	0	0.805	0.849	0.825	0.938	2.030	0.818	0.917	156	519	868	771	-0.314	387	481	354	417	0
3	10	15	"iYIL005W"	"iYIL005W"	13590	17860	140	304	277	136	51	55	15	94	91	0	1013	879	501	87	91	45	90	87	0	0.273	0.285	0.280	0.313	2.000	0.265	0.881	156	505	1179	1018	-1.872	253	926	226	792	0
3	11	15	"iYIL001W"	"iYIL001W"	13780	17860	130	415	394	203	52	56	17	93	86	0	2497	2208	1305	90	92	24	99	93	0	0.151	0.161	0.163	0.182	1.765	0.152	0.922	120	476	2770	2460	-2.729	363	2407	342	2118	0
3	12	15	"iYIR003W"	"iYIR003W"	13980	17860	140	490	450	219	52	55	19	94	92	0	922	798	408	89	92	25	92	89	0	0.526	0.561	0.567	0.597	1.853	0.545	0.928	156	511	1271	1107	-0.927	438	833	398	709	0
3	13	15	"iYIR018W-0"	"iYIR018W-0"	14180	17860	140	3388	2776	1415	51	54	18	100	99	0	6271	4927	2637	88	90	22	100	100	0	0.540	0.563	0.556	0.591	1.464	0.553	0.958	156	496	9520	7564	-0.890	3337	6183	2725	4839	0
3	14	15	"iYIR020C"	"iYIR020C"	14380	17860	140	693	640	343	51	54	17	96	92	0	521	452	226	83	86	22	88	85	0	1.466	1.596	1.582	1.570	1.602	1.580	0.932	156	534	1080	958	0.552	642	438	589	369	0
3	15	15	"iYIR022W"	"iYIR022W"	14590	17860	130	907	835	443	51	54	13	98	97	0	670	599	317	85	87	20	89	86	0	1.463	1.525	1.534	1.728	1.655	1.497	0.931	120	464	1441	1298	0.549	856	585	784	514	0
3	16	15	"iYIR038C-0"	"iYIR038C-0"	14770	17860	140	2294	1941	1143	54	56	17	100	98	0	2085	1819	1080	95	98	25	97	93	0	1.126	1.095	1.100	1.173	1.622	1.088	0.953	156	461	4230	3611	0.171	2240	1990	1887	1724	0
3	17	15	"iYIRCdelta6-2"	"iYIRCdelta6-2"	14960	17860	150	3380	2839	1849	55	64	55	94	92	0	3940	3333	2109	99	106	41	96	92	0	0.866	0.861	0.860	0.896	1.641	0.877	0.945	156	529	7166	6018	-0.208	3325	3841	2784	3234	0
3	18	15	"iYIR042C"	"iYIR042C"	15170	17860	140	309	294	141	56	67	45	88	78	0	382	376	176	102	111	47	85	79	0	0.904	0.869	0.856	0.917	1.814	0.820	0.870	156	525	533	512	-0.146	253	280	238	274	0
3	19	15	"iYJR076C"	"iYJR076C"	15370	17870	150	3472	2836	1475	58	66	35	99	95	0	2719	2283	1184	115	123	44	96	91	0	1.311	1.281	1.310	1.374	1.525	1.283	0.945	156	525	6018	4946	0.391	3414	2604	2778	2168	0
3	20	15	"iYJR083C"	"iYJR083C"	15570	17870	140	1231	1104	562	57	65	28	94	93	0	981	859	408	124	133	40	91	89	0	1.370	1.424	1.393	1.410	1.390	1.427	0.945	156	520	2031	1782	0.454	1174	857	1047	735	0
3	21	15	"iYJR089W"	"iYJR089W"	15770	17870	140	1434	1230	555	55	61	26	96	94	0	3621	3169	1442	118	125	47	94	93	0	0.394	0.385	0.387	0.406	1.573	0.380	0.956	156	732	4882	4226	-1.345	1379	3503	1175	3051	0
3	1	16	"iYJR102C"	"iYJR102C"	11780	18060	140	2727	2242	1099	51	53	15	100	98	0	1395	1155	573	82	86	36	93	89	0	2.038	2.042	2.032	2.120	1.478	2.049	0.949	156	601	3989	3264	1.027	2676	1313	2191	1073	0
3	2	16	"iYJR106W"	"iYJR106W"	11970	18050	140	973	879	438	51	54	16	98	95	0	948	807	434	85	88	21	92	91	0	1.068	1.147	1.129	1.302	1.754	1.105	0.920	156	449	1785	1550	0.095	922	863	828	722	0
3	3	16	"iYJR110W"	"iYJR110W"	12170	18060	140	443	399	184	52	56	20	93	91	0	722	634	323	87	92	31	91	87	0	0.616	0.634	0.648	0.721	1.969	0.597	0.896	156	484	1026	894	-0.700	391	635	347	547	0
3	4	16	"iYJR128W"	"iYJR128W"	12370	18060	140	1190	1045	494	52	55	19	97	96	0	524	463	202	84	88	30	90	87	0	2.586	2.620	2.631	2.678	1.532	2.407	0.526	156	500	1578	1372	1.371	1138	440	993	379	0
3	5	16	"iYJR132W"	"iYJR132W"	12570	18060	150	1015	881	414	51	54	16	96	93	0	2030	1778	872	81	84	24	96	92	0	0.495	0.489	0.489	0.523	1.721	0.478	0.948	156	517	2913	2527	-1.016	964	1949	830	1697	0
3	6	16	"iYJR136C"	"iYJR136C"	12770	18060	140	279	264	105	51	54	17	93	92	0	324	313	131	81	86	27	89	87	0	0.938	0.918	0.891	0.920	1.707	0.866	0.818	156	482	471	445	-0.092	228	243	213	232	0
3	7	16	"iYJR151C-1"	"iYJR151C-1"	12970	18060	140	3642	3138	1497	53	56	19	100	99	0	1412	1217	645	86	90	24	95	94	0	2.707	2.728	2.727	2.839	1.574	2.791	0.838	156	494	4915	4216	1.437	3589	1326	3085	1131	0
3	8	16	"iYJR153W-1"	"iYJR153W-1"	13180	18060	140	3566	2911	1390	54	57	16	100	100	0	3548	2921	1446	92	95	24	100	100	0	1.016	1.010	1.007	1.034	1.612	0.997	0.947	156	483	6968	5686	0.023	3512	3456	2857	2829	0
3	9	16	"iYJR157W-0"	"iYJR157W-0"	13380	18060	150	2672	2358	1112	55	59	22	98	97	0	6079	5037	2367	92	103	60	99	96	0	0.437	0.466	0.464	0.457	1.541	0.464	0.947	156	427	8604	7248	-1.194	2617	5987	2303	4945	-100
3	10	16	"iYKR051W"	"iYKR051W"	13510	18050	150	798	747	437	54	58	22	92	89	0	2804	2438	1519	90	103	71	90	85	0	0.274	0.295	0.299	0.335	1.818	0.273	0.932	156	450	3458	3041	-1.867	744	2714	693	2348	-100
3	11	16	"iYKR055W"	"iYKR055W"	13710	18050	150	728	669	348	53	57	20	97	93	0	547	475	261	88	98	57	80	75	0	1.471	1.592	1.560	1.782	1.710	1.514	0.912	156	584	1134	1003	0.556	675	459	616	387	0
3	12	16	"iYKR059W"	"iYKR059W"	13910	18050	150	487	414	226	52	57	21	89	87	0	500	433	256	86	91	26	81	76	0	1.051	1.043	1.049	1.182	2.050	0.964	0.892	156	543	849	709	0.071	435	414	362	347	0
3	13	16	"itK(UUU)K"	"itK(UUU)K"	14110	18050	150	247	246	145	52	57	23	86	83	0	261	250	135	84	104	347	7	0	0	1.102	1.169	1.099	1.136	1.971	0.102	0.072	156	532	372	360	0.140	195	177	194	166	0
3	14	16	"iYKR076W"	"iYKR076W"	14310	18050	150	752	687	410	53	59	27	92	90	0	468	448	257	85	91	32	85	81	0	1.825	1.747	1.703	1.803	1.910	1.700	0.905	156	532	1082	997	0.868	699	383	634	363	0
3	15	16	"iYKR080W"	"iYKR080W"	14510	18050	150	382	362	221	53	58	24	84	80	0	455	429	261	86	90	26	82	78	0	0.892	0.901	0.891	0.852	1.982	0.866	0.920	156	544	698	652	-0.166	329	369	309	343	0
3	16	16	"iYKR095W"	"iYKR095W"	14700	18050	150	3453	2818	1587	53	57	19	98	97	0	2616	2187	1268	92	95	24	96	94	0	1.347	1.320	1.324	1.465	1.705	1.296	0.958	156	508	5924	4860	0.430	3400	2524	2765	2095	0
3	17	16	"iYKR099W"	"iYKR099W"	14900	18050	150	2089	1737	897	55	64	55	94	92	0	3448	2728	1483	95	103	40	96	92	0	0.607	0.639	0.631	0.695	1.589	0.611	0.948	156	556	5387	4315	-0.721	2034	3353	1682	2633	0
3	18	16	"iYKR101W-2"	"iYKR101W-2"	15110	18050	150	2600	2222	1424	55	66	58	94	92	0	1567	1318	820	97	107	50	92	87	0	1.731	1.775	1.780	1.854	1.569	1.767	0.958	156	567	4015	3388	0.792	2545	1470	2167	1221	0
3	19	16	"iYLL062C"	"iYLL062C"	15310	18050	150	1092	967	653	55	63	32	91	86	0	986	885	577	110	119	45	86	81	0	1.184	1.177	1.170	1.224	1.728	1.113	0.932	156	522	1913	1687	0.243	1037	876	912	775	0
3	20	16	"iYLL058W"	"iYLL058W"	15510	18050	150	1062	889	509	57	64	26	94	91	0	1315	1112	633	126	133	39	91	86	0	0.845	0.844	0.822	0.871	1.690	0.820	0.949	156	513	2194	1818	-0.243	1005	1189	832	986	0
3	21	16	"iYLL055W"	"iYLL055W"	15710	18050	150	2874	2409	1196	55	61	27	100	98	0	7767	6054	3307	120	127	37	99	98	0	0.369	0.397	0.396	0.442	1.467	0.382	0.960	156	659	10466	8288	-1.440	2819	7647	2354	5934	0
3	1	17	"iYLRWdelta14"	"iYLRWdelta14"	11710	18240	150	719	647	315	52	56	29	93	91	0	1919	1694	892	85	89	27	94	90	0	0.364	0.370	0.373	0.408	1.661	0.361	0.949	156	662	2501	2204	-1.459	667	1834	595	1609	0
3	2	17	"iYLR259C"	"iYLR259C"	11910	18240	150	1456	1392	796	52	57	30	98	96	0	770	708	370	84	89	26	94	93	0	2.047	2.147	2.188	2.194	1.464	2.175	0.949	156	503	2090	1964	1.033	1404	686	1340	624	0
3	3	17	"iYLR263W"	"iYLR263W"	12110	18240	150	573	569	306	52	56	21	94	91	0	693	631	324	81	85	23	92	91	0	0.851	0.940	0.945	0.990	1.576	0.923	0.945	156	519	1133	1067	-0.232	521	612	517	550	0
3	4	17	"iYLR281C"	"iYLR281C"	12310	18240	150	244	236	101	52	56	22	90	87	0	330	310	132	80	84	22	88	87	0	0.768	0.800	0.772	0.747	1.692	0.705	0.734	156	505	442	414	-0.381	192	250	184	230	0
3	5	17	"iYLR286C"	"iYLR286C"	12510	18240	150	1358	1291	725	51	53	17	96	93	0	1066	946	513	80	84	21	91	88	0	1.326	1.432	1.427	1.539	1.706	1.428	0.949	156	505	2293	2106	0.407	1307	986	1240	866	0
3	6	17	"iYLR289W"	"iYLR289W"	12710	18240	150	383	362	192	50	56	39	86	80	0	721	655	397	81	84	23	87	84	0	0.520	0.544	0.551	0.618	1.835	0.509	0.933	156	505	973	886	-0.943	333	640	312	574	0
3	7	17	"iYLR304C"	"iYLR304C"	12910	18240	150	1304	1185	623	52	58	40	92	88	0	918	805	418	83	87	24	89	89	0	1.499	1.569	1.554	1.640	1.759	1.570	0.955	156	505	2087	1855	0.584	1252	835	1133	722	0
3	8	17	"iYLR308W"	"iYLR308W"	13110	18240	150	288	280	142	53	57	19	89	85	0	795	747	417	84	88	25	91	89	0	0.331	0.342	0.334	0.351	1.644	0.329	0.918	156	511	946	890	-1.597	235	711	227	663	0
3	9	17	"iYLR312W-A"	"iYLR312W-A"	13310	18240	150	890	816	447	53	57	21	94	92	0	1324	1138	657	85	92	43	89	85	0	0.676	0.725	0.725	0.801	1.586	0.704	0.959	156	482	2076	1816	-0.566	837	1239	763	1053	0
3	10	17	"iYLR330W"	"iYLR330W"	13510	18240	150	1589	1372	697	53	57	22	96	94	0	1218	1044	534	85	94	51	88	87	0	1.356	1.375	1.370	1.513	1.729	1.357	0.961	156	622	2669	2278	0.439	1536	1133	1319	959	0
3	11	17	"iSNR61"	"iSNR61"	13780	18260	140	260	243	110	52	56	20	89	85	0	516	477	244	84	88	23	90	87	0	0.481	0.486	0.483	0.518	1.845	0.458	0.900	156	617	640	584	-1.054	208	432	191	393	0
3	12	17	"iYLRWdelta20"	"iYLRWdelta20"	13970	18260	140	290	270	140	52	57	20	89	85	0	335	317	165	82	102	354	25	0	0	0.941	0.928	0.926	0.923	1.873	0.881	0.870	156	509	491	453	-0.088	238	253	218	235	0
3	13	17	"iYMR033W"	"iYMR033W"	14170	18260	140	316	296	151	54	59	22	90	83	0	788	707	411	85	106	348	69	50	0	0.373	0.389	0.393	0.435	1.784	0.199	0.470	156	527	965	864	-1.424	262	703	242	622	0
3	14	17	"iYMR037C"	"iYMR037C"	14370	18260	140	1348	1282	758	59	72	34	93	91	0	882	793	446	89	98	71	83	80	0	1.625	1.737	1.741	1.740	1.920	1.742	0.958	156	535	2082	1927	0.701	1289	793	1223	704	0
3	15	17	"iYMR041C"	"iYMR041C"	14570	18260	140	545	486	244	57	70	34	90	87	0	544	481	243	87	96	71	85	77	0	1.068	1.089	1.060	1.095	1.504	1.053	0.929	156	524	945	823	0.095	488	457	429	394	0
3	16	17	"iYMR054W"	"iYMR054W"	14750	18250	130	588	516	270	53	58	23	92	89	0	1376	1119	649	88	93	29	90	89	0	0.415	0.449	0.461	0.522	1.707	0.429	0.944	120	517	1823	1494	-1.268	535	1288	463	1031	0
3	17	17	"iYMR058W"	"iYMR058W"	14960	18260	140	586	548	282	53	58	23	89	88	0	897	781	406	89	95	31	88	86	0	0.660	0.715	0.706	0.730	1.499	0.704	0.950	156	574	1341	1187	-0.600	533	808	495	692	0
3	18	17	"iYMR063W"	"iYMR063W"	15160	18260	140	389	380	173	53	59	25	99	92	0	441	418	183	94	99	31	89	87	0	0.968	1.009	1.032	1.109	1.772	0.976	0.923	156	548	683	651	-0.046	336	347	327	324	0
3	19	17	"iYMR078C"	"iYMR078C"	15360	18260	140	1567	1508	813	54	60	26	98	96	0	991	906	422	109	114	32	91	87	0	1.715	1.824	1.774	1.873	1.472	1.877	0.950	156	578	2395	2251	0.779	1513	882	1454	797	0
3	20	17	"iYMR082C-0"	"iYMR082C-0"	15570	18260	150	2479	2291	1082	56	60	23	99	96	0	1105	982	427	116	125	77	90	89	0	2.450	2.581	2.560	2.577	1.385	2.674	0.953	156	601	3412	3101	1.293	2423	989	2235	866	0
3	21	17	"iYMR085W"	"iYMR085W"	15770	18260	140	547	550	292	55	61	28	91	90	0	501	475	214	117	124	69	84	80	0	1.281	1.383	1.333	1.286	1.658	1.385	0.929	156	747	876	853	0.358	492	384	495	358	0
3	1	18	"iYMR101C"	"iYMR101C"	11780	18450	140	776	712	358	51	56	28	95	92	0	678	629	315	88	92	24	91	89	0	1.229	1.222	1.238	1.310	1.445	1.195	0.958	156	675	1315	1202	0.297	725	590	661	541	0
3	2	18	"iYMR105C"	"iYMR105C"	11970	18450	140	1193	1294	800	52	55	18	99	99	0	729	732	420	87	91	28	94	92	0	1.777	1.926	1.881	2.023	1.411	1.934	0.968	156	541	1783	1887	0.830	1141	642	1242	645	0
3	3	18	"iYMR107W"	"iYMR107W"	12170	18450	140	1022	952	465	53	57	21	96	94	0	601	549	262	85	89	29	91	87	0	1.878	1.938	1.949	2.004	1.359	1.896	0.951	156	559	1485	1363	0.909	969	516	899	464	0
3	4	18	"iYNL272C"	"iYNL272C"	12370	18450	150	947	847	393	52	56	21	97	94	0	729	650	301	82	84	22	93	91	0	1.383	1.400	1.395	1.464	1.486	1.379	0.966	156	590	1542	1363	0.468	895	647	795	568	0
3	5	18	"iYNL267W"	"iYNL267W"	12570	18450	140	316	290	129	51	53	15	93	88	0	442	404	191	80	82	19	89	89	0	0.732	0.738	0.753	0.757	1.602	0.708	0.924	156	555	627	563	-0.450	265	362	239	324	0
3	6	18	"iYNL262W"	"iYNL262W"	12770	18450	150	366	342	164	50	56	40	91	83	0	933	809	444	82	85	24	92	89	0	0.371	0.402	0.403	0.444	1.628	0.382	0.896	156	556	1167	1019	-1.429	316	851	292	727	0
3	7	18	"iYNL244C"	"iYNL244C"	12970	18450	140	1009	1293	4258	51	58	41	95	92	0	680	672	963	82	87	26	89	89	0	1.602	2.105	1.603	1.790	1.773	4.861	0.925	156	551	1556	1832	0.680	958	598	1242	590	0
3	8	18	"iYNL240C"	"iYNL240C"	13170	18450	140	359	344	162	51	54	16	94	92	0	342	323	150	79	83	23	87	85	0	1.171	1.201	1.217	1.242	1.439	1.151	0.918	156	545	571	537	0.228	308	263	293	244	0
3	9	18	"iYNL235C"	"iYNL235C"	13360	18450	150	488	472	238	51	53	14	91	91	0	559	544	275	78	83	23	88	85	0	0.909	0.903	0.891	0.870	1.718	0.888	0.950	156	581	918	887	-0.138	437	481	421	466	0
3	10	18	"iYNL217W"	"iYNL217W"	13570	18450	140	610	589	267	52	55	17	95	93	0	396	382	166	82	87	32	89	85	0	1.777	1.790	1.803	1.873	1.489	1.750	0.908	156	600	872	837	0.830	558	314	537	300	0
3	11	18	"iYNL213C"	"iYNL213C"	13770	18450	140	1023	1026	534	52	55	17	98	96	0	551	527	263	84	89	33	89	87	0	2.079	2.199	2.185	2.307	1.363	2.176	0.936	156	549	1438	1417	1.056	971	467	974	443	0
3	12	18	"iYNL209W"	"iYNL209W"	13970	18450	150	972	937	485	53	58	21	99	96	0	1621	1524	831	84	88	23	97	95	0	0.598	0.614	0.608	0.648	1.364	0.597	0.971	156	558	2456	2324	-0.742	919	1537	884	1440	0
3	13	18	"iYNL189W"	"iYNL189W"	14170	18450	150	678	633	308	58	69	33	100	98	0	874	740	403	87	91	25	91	87	0	0.788	0.881	0.900	1.049	1.754	0.824	0.946	156	568	1407	1228	-0.344	620	787	575	653	0
3	14	18	"iYNL184C"	"iYNL184C"	14370	18450	140	512	487	223	66	80	38	97	89	0	1117	975	522	90	98	70	90	85	0	0.434	0.476	0.484	0.565	1.845	0.427	0.903	156	564	1473	1306	-1.203	446	1027	421	885	0
3	15	18	"iYNL179C-0"	"iYNL179C-0"	14580	18450	150	667	650	353	59	71	32	87	87	0	814	777	427	88	97	70	85	82	0	0.837	0.858	0.833	0.856	1.520	0.820	0.929	156	557	1334	1280	-0.256	608	726	591	689	0
3	16	18	"iYOL125W"	"iYOL125W"	14780	18460	150	283	272	115	53	57	22	91	89	0	449	418	185	86	92	28	91	88	0	0.634	0.660	0.644	0.642	1.649	0.632	0.908	156	533	593	551	-0.658	230	363	219	332	0
3	17	18	"iYOL121C"	"iYOL121C"	14960	18450	140	985	934	506	52	56	22	94	91	0	903	840	443	88	92	27	87	85	0	1.145	1.173	1.158	1.188	1.428	1.125	0.891	156	538	1748	1634	0.195	933	815	882	752	0
3	18	18	"iYOL117W"	"iYOL117W"	15170	18450	150	974	928	391	54	62	31	99	96	0	750	683	280	97	102	30	96	95	0	1.409	1.491	1.510	1.548	1.280	1.208	0.570	156	593	1573	1460	0.495	920	653	874	586	0
3	19	18	"iYOLWdelta5"	"iYOLWdelta5"	15380	18460	140	1035	967	469	55	63	32	99	96	0	759	711	323	112	116	32	95	92	0	1.515	1.523	1.521	1.629	1.521	1.503	0.966	156	570	1627	1511	0.599	980	647	912	599	0
3	20	18	"iYOL099C"	"iYOL099C"	15580	18460	140	681	669	277	55	61	28	100	99	0	1916	1787	909	117	125	81	97	93	0	0.348	0.368	0.367	0.422	1.558	0.342	0.936	156	538	2425	2284	-1.523	626	1799	614	1670	0
3	21	18	"iYOL096C"	"iYOL096C"	15780	18460	140	671	636	290	53	60	31	94	92	0	874	813	367	117	142	473	76	21	0	0.816	0.838	0.834	0.843	1.472	0.297	0.288	156	710	1375	1279	-0.293	618	757	583	696	0
3	1	19	"iYOL081W"	"iYOL081W"	11780	18650	140	995	920	462	50	53	16	99	98	0	1648	1463	769	88	91	23	98	97	0	0.606	0.633	0.636	0.681	1.432	0.619	0.955	156	700	2505	2245	-0.723	945	1560	870	1375	0
3	2	19	"iYOL076W"	"iYOL076W"	11980	18650	140	622	577	289	51	56	23	96	92	0	2205	2007	1105	90	97	36	95	94	0	0.270	0.274	0.276	0.310	1.630	0.264	0.952	156	545	2686	2443	-1.889	571	2115	526	1917	0
3	3	19	"iYOL071W"	"iYOL071W"	12180	18650	140	302	306	151	52	56	22	94	89	0	815	810	464	90	95	34	91	89	0	0.345	0.353	0.338	0.394	1.738	0.329	0.900	156	545	975	974	-1.536	250	725	254	720	0
3	4	19	"iYOL055C"	"iYOL055C"	12380	18650	140	658	617	327	52	55	16	94	91	0	901	816	442	84	86	23	88	86	0	0.742	0.772	0.771	0.844	1.773	0.757	0.945	156	570	1423	1297	-0.431	606	817	565	732	0
3	5	19	"iYOL054W"	"iYOL054W"	12590	18650	140	830	792	379	52	54	15	99	96	0	794	779	387	82	84	21	95	94	0	1.093	1.062	1.071	1.144	1.541	1.031	0.945	156	557	1490	1437	0.128	778	712	740	697	0
3	6	19	"iYOL050C"	"iYOL050C"	12780	18640	140	717	645	308	51	55	23	95	90	0	1224	1042	549	84	88	25	92	88	0	0.584	0.620	0.625	0.706	1.682	0.595	0.956	156	532	1806	1552	-0.775	666	1140	594	958	0
3	7	19	"iYOR248W"	"iYOR248W"	12980	18650	150	617	535	280	52	56	24	94	92	0	1125	970	539	86	89	27	91	89	0	0.544	0.546	0.552	0.597	1.552	0.530	0.943	156	568	1604	1367	-0.879	565	1039	483	884	0
3	8	19	"iYOR252W"	"iYOR252W"	13180	18650	140	296	271	127	51	53	16	92	88	0	482	450	226	82	87	47	87	83	0	0.613	0.598	0.583	0.610	1.620	0.556	0.870	156	562	645	588	-0.707	245	400	220	368	0
3	9	19	"iYOR256C"	"iYOR256C"	13390	18650	150	837	777	402	49	52	13	98	96	0	1024	937	490	81	86	49	92	88	0	0.836	0.850	0.864	0.945	1.641	0.835	0.953	156	562	1731	1584	-0.259	788	943	728	856	0
3	10	19	"iYOR272W"	"iYOR272W"	13570	18650	150	482	464	231	51	53	15	97	94	0	919	861	461	83	86	30	92	90	0	0.516	0.531	0.526	0.609	1.783	0.507	0.928	156	568	1267	1191	-0.956	431	836	413	778	0
3	11	19	"iYOR277C"	"iYOR277C"	13770	18650	150	2284	2115	1160	52	56	21	99	99	0	1647	1493	816	85	89	30	96	92	0	1.429	1.465	1.472	1.624	1.541	1.449	0.960	156	610	3794	3471	0.515	2232	1562	2063	1408	0
3	12	19	"iYOR283W"	"iYOR283W"	13980	18660	150	2291	2058	918	53	59	24	100	99	0	1813	1593	728	84	97	191	90	86	0	1.294	1.329	1.336	1.407	1.378	1.284	0.907	156	586	3967	3514	0.372	2238	1729	2005	1509	0
3	13	19	"iYOR298W"	"iYOR298W"	14180	18660	140	382	361	167	57	67	32	92	87	0	468	427	203	84	97	196	76	46	0	0.846	0.886	0.881	0.906	1.500	0.483	0.425	156	564	709	647	-0.241	325	384	304	343	0
3	14	19	"iYOR303W"	"iYOR303W"	14380	18660	140	668	602	280	58	66	30	94	89	0	435	402	189	86	91	30	87	83	0	1.748	1.722	1.729	1.865	1.632	1.618	0.810	156	588	959	860	0.806	610	349	544	316	0
3	15	19	"iYOR306C"	"iYOR306C"	14580	18650	150	1842	1679	1016	55	60	22	98	96	0	2587	2229	1444	89	93	27	95	92	0	0.715	0.759	0.739	0.863	1.580	0.728	0.954	156	569	4285	3764	-0.483	1787	2498	1624	2140	0
3	16	19	"iYOR322C"	"iYOR322C"	14770	18650	150	800	721	369	53	59	22	99	94	0	669	570	284	89	92	26	90	87	0	1.288	1.389	1.423	1.505	1.686	1.363	0.930	156	517	1327	1149	0.365	747	580	668	481	0
3	17	19	"iYOR327C"	"iYOR327C"	14970	18660	140	1181	1088	611	52	58	23	96	95	0	910	801	438	88	92	25	91	86	0	1.373	1.453	1.441	1.629	1.802	1.440	0.951	156	544	1951	1749	0.458	1129	822	1036	713	0
3	18	19	"iYOR332W"	"iYOR332W"	15170	18650	150	1606	1483	793	55	65	38	100	98	0	1131	1015	513	97	103	32	94	91	0	1.500	1.556	1.562	1.657	1.420	1.563	0.957	156	604	2585	2346	0.585	1551	1034	1428	918	0
3	19	19	"iYPL045W"	"iYPL045W"	15380	18660	140	620	561	291	56	67	41	93	87	0	890	807	397	111	117	34	95	89	0	0.724	0.726	0.739	0.747	1.539	0.719	0.929	156	521	1343	1201	-0.466	564	779	505	696	0
3	20	19	"iYPL040C"	"iYPL040C"	15580	18650	150	963	870	442	54	62	35	99	96	0	652	608	293	120	124	34	91	87	0	1.709	1.672	1.700	1.896	1.821	1.639	0.939	156	472	1441	1304	0.773	909	532	816	488	0
3	21	19	"iYPL036W"	"iYPL036W"	15780	18660	150	4063	3599	1866	55	62	28	99	98	0	4840	4201	2159	123	146	484	85	83	0	0.850	0.869	0.875	0.922	1.411	0.865	0.973	156	666	8725	7622	-0.235	4008	4717	3544	4078	0
3	1	20	"iYPL017C"	"iYPL017C"	11790	18850	140	870	873	467	49	51	13	98	98	0	888	921	490	86	88	21	94	92	0	1.024	0.987	0.987	1.050	1.540	0.966	0.931	156	850	1623	1659	0.034	821	802	824	835	0
3	2	20	"iYPL013C"	"iYPL013C"	11990	18850	140	831	812	441	51	54	21	98	96	0	1223	1148	625	89	94	31	95	92	0	0.688	0.719	0.715	0.778	1.619	0.704	0.937	156	710	1914	1820	-0.540	780	1134	761	1059	0
3	3	20	"iYPL009C"	"iYPL009C"	12190	18850	150	719	691	349	51	54	20	96	95	0	863	785	405	90	93	29	92	90	0	0.864	0.921	0.905	0.982	1.473	0.895	0.927	156	748	1441	1335	-0.211	668	773	640	695	0
3	4	20	"iYPR005C"	"iYPR005C"	12380	18850	140	790	791	422	51	53	15	99	97	0	880	843	440	82	86	22	95	93	0	0.926	0.972	0.976	1.013	1.466	0.968	0.943	156	717	1537	1501	-0.111	739	798	740	761	0
3	5	20	"itG(GCC)P1"	"itG(GCC)P1"	12590	18850	140	1071	1052	533	50	53	14	99	99	0	725	679	326	80	83	20	93	92	0	1.583	1.673	1.679	1.784	1.572	1.676	0.932	156	736	1666	1601	0.663	1021	645	1002	599	0
3	6	20	"itK(CUU)P"	"itK(CUU)P"	12790	18850	150	1901	1787	996	50	52	15	100	100	0	1694	1528	866	82	84	20	97	95	0	1.148	1.201	1.191	1.329	1.569	1.180	0.942	156	776	3463	3183	0.199	1851	1612	1737	1446	0
3	7	20	"iYPR024W"	"iYPR024W"	12990	18850	150	1379	1392	797	49	52	14	100	99	0	2066	1989	1050	83	86	23	100	98	0	0.671	0.705	0.693	0.732	1.466	0.710	0.931	156	773	3313	3249	-0.576	1330	1983	1343	1906	0
3	8	20	"itF(GAA)P2"	"itF(GAA)P2"	13190	18850	140	1156	1170	738	49	52	14	99	97	0	1393	1312	832	81	85	44	92	90	0	0.844	0.911	0.901	0.999	1.610	0.898	0.939	156	717	2419	2352	-0.245	1107	1312	1121	1231	0
3	9	20	"iYPR031W"	"iYPR031W"	13390	18850	140	425	415	206	49	51	13	98	97	0	418	400	197	80	84	43	89	84	0	1.112	1.144	1.102	1.175	1.652	1.110	0.917	156	724	714	686	0.154	376	338	366	320	0
3	10	20	"CEN3"	"CEN3"	13590	18850	130	190	188	94	50	53	26	89	79	0	313	315	158	84	87	33	85	81	0	0.611	0.597	0.580	0.585	2.027	0.565	0.767	120	637	369	369	-0.710	140	229	138	231	0
3	11	20	"iRDN5-2"	"iRDN5-2"	13790	18860	140	197	198	76	51	57	31	91	85	0	271	260	112	85	112	641	0	0	0	0.785	0.840	0.797	0.873	1.764	0.011	0.009	156	739	332	322	-0.349	146	186	147	175	0
3	12	20	"itN(GUU)C"	"itN(GUU)C"	13980	18850	140	137	151	76	51	56	23	92	80	0	221	217	105	82	93	178	27	1	0	0.619	0.741	0.683	0.693	2.173	1.154	0.060	156	674	225	235	-0.693	86	139	100	135	0
3	13	20	"iYCL018W"	"iYCL018W"	14180	18850	150	743	661	317	51	55	20	98	97	0	3124	2827	1532	83	96	172	93	90	0	0.228	0.222	0.220	0.243	1.497	0.208	0.927	156	750	3733	3354	-2.136	692	3041	610	2744	0
3	14	20	"iYCR003W"	"iYCR003W"	14390	18860	150	753	679	333	52	57	22	98	96	0	1754	1544	763	85	91	37	98	95	0	0.420	0.430	0.437	0.457	1.453	0.420	0.934	156	793	2370	2086	-1.251	701	1669	627	1459	0
3	15	20	"iYCR007C"	"iYCR007C"	14590	18860	150	2003	1842	850	55	70	96	98	96	0	1490	1305	595	90	104	100	92	90	0	1.391	1.471	1.477	1.587	1.429	1.467	0.942	156	767	3348	3002	0.477	1948	1400	1787	1215	0
3	16	20	"iYHR212C"	"iYHR212C"	14780	18850	150	2585	2315	1147	55	69	91	97	94	0	4411	3661	1927	90	105	94	98	94	0	0.586	0.633	0.625	0.672	1.368	0.634	0.895	156	731	6851	5831	-0.772	2530	4321	2260	3571	0
3	17	20	"iYHR214W-A"	"iYHR214W-A"	14980	18850	150	644	647	299	53	60	27	97	95	0	851	797	393	91	104	193	85	75	0	0.778	0.841	0.840	0.922	1.530	0.666	0.697	156	766	1351	1300	-0.363	591	760	594	706	0
3	18	20	"iYHR218W"	"iYHR218W"	15190	18850	150	14143	12210	6401	54	63	37	100	100	0	6264	5302	2755	101	114	195	99	94	0	2.286	2.337	2.277	2.343	1.302	2.356	0.968	156	778	20252	17357	1.193	14089	6163	12156	5201	0
3	19	20	"iYLR162W-A"	"iYLR162W-A"	15390	18850	140	7280	6889	3615	57	68	45	100	100	0	4308	3721	1995	111	120	54	100	100	0	1.721	1.893	1.794	1.991	1.415	1.904	0.929	156	634	11420	10442	0.783	7223	4197	6832	3610	0
3	20	20	"iYLRWdelta6-B"	"iYLRWdelta6-B"	15590	18850	180	1390	5247	5842	56	63	31	100	100	0	1168	3758	4201	115	122	76	100	98	0	1.267	1.425	1.345	1.337	1.631	1.416	0.949	256	974	2387	8834	0.341	1334	1053	5191	3643	0
3	21	20	"RDN5-1"	"RDN5-1"	15810	18850	170	1308	1231	907	55	62	28	100	100	0	1141	1070	744	124	130	71	95	87	0	1.232	1.243	1.182	1.280	1.530	1.232	0.922	208	1133	2270	2122	0.301	1253	1017	1176	946	0
4	1	1	"TFC3"	"YAL001C"	16220	14970	150	3178	3062	1679	57	65	59	100	100	0	7761	7856	4377	114	122	65	100	100	0	0.408	0.388	0.382	0.396	1.303	0.381	0.966	156	915	10768	10747	-1.293	3121	7647	3005	7742	0
4	2	1	"FUN19"	"YAL034C"	16440	14970	140	2764	2830	1443	59	69	64	100	100	0	5149	4961	2482	115	132	224	97	94	0	0.537	0.572	0.581	0.596	1.516	0.567	0.952	156	739	7739	7617	-0.896	2705	5034	2771	4846	0
4	3	1	"YAL065C"	"YAL065C"	16640	14980	140	15012	13174	6279	59	64	25	100	100	0	9191	8051	3657	113	126	223	100	98	0	1.647	1.652	1.644	1.652	1.407	1.678	0.975	156	683	24031	21053	0.720	14953	9078	13115	7938	0
4	4	1	"EFB1"	"YAL003W"	16850	14970	140	6753	5994	2525	60	65	25	100	100	0	2892	2594	1067	114	120	33	98	98	0	2.409	2.393	2.401	2.483	1.352	2.411	0.975	156	726	9471	8414	1.269	6693	2778	5934	2480	0
4	5	1	"YAL035C-A"	"YAL035C-A"	17040	14970	130	3633	3415	1206	60	67	29	100	100	0	8788	8013	2910	118	125	40	100	100	0	0.412	0.425	0.421	0.449	1.360	0.417	0.972	120	606	12243	11250	-1.279	3573	8670	3355	7895	0
4	6	1	"YAL066W"	"YAL066W"	17230	14970	130	2232	2034	718	58	66	29	100	99	0	3174	2854	999	117	122	37	97	95	0	0.711	0.722	0.732	0.766	1.517	0.717	0.968	120	668	5231	4713	-0.492	2174	3057	1976	2737	0
4	7	1	"SSA1"	"YAL005C"	17440	14960	130	8746	7903	2992	60	69	32	100	100	0	5145	4544	1728	113	120	45	99	98	0	1.726	1.770	1.788	1.856	1.401	1.766	0.975	120	701	13718	12274	0.788	8686	5032	7843	4431	0
4	8	1	"FUN11"	"YAL036C"	17640	14960	130	7723	6776	2562	58	72	54	100	100	0	4703	4220	1621	110	124	109	96	95	0	1.669	1.635	1.631	1.782	1.567	1.633	0.973	120	666	12258	10828	0.739	7665	4593	6718	4110	0
4	9	1	"YAL068C"	"YAL068C"	17840	14960	140	16860	14579	6114	57	92	234	100	100	0	11570	9843	4260	111	133	143	100	97	0	1.466	1.492	1.488	1.561	1.313	1.486	0.980	156	711	28262	24254	0.552	16803	11459	14522	9732	0
4	10	1	"FUN14"	"YAL008W"	18030	14960	150	7751	6803	3882	57	62	25	100	100	0	14690	12879	7331	116	121	42	100	100	0	0.528	0.529	0.528	0.540	1.349	0.525	0.977	156	770	22268	19509	-0.922	7694	14574	6746	12763	0
4	11	1	"CDC19"	"YAL038W"	18240	14960	140	6133	5304	2142	58	85	244	98	96	0	5211	4449	1865	119	147	363	96	94	0	1.193	1.212	1.203	1.264	1.258	1.187	0.972	156	759	11167	9576	0.255	6075	5092	5246	4330	0
4	12	1	"ERP1"	"YAR002C-A"	18430	14960	120	377	1070	1473	58	93	280	54	33	0	439	1028	1337	121	154	406	40	27	0	1.003	1.116	1.026	1.121	1.948	1.107	0.961	120	610	637	1919	0.005	319	318	1012	907	0
4	13	1	"RPB5"	"YBR154C"	18640	14960	130	6059	5444	1998	59	147	1194	90	86	0	7197	6335	2445	120	176	836	91	87	0	0.848	0.866	0.871	0.934	1.379	0.854	0.979	120	682	13077	11600	-0.238	6000	7077	5385	6215	0
4	14	1	"MBA1"	"YBR185C"	18840	14960	130	4557	4251	1653	62	516	4159	62	0	0	2906	2599	1065	120	379	2557	54	0	0	1.613	1.690	1.695	1.854	1.478	1.664	0.965	120	683	7281	6668	0.690	4495	2786	4189	2479	0
4	15	1	"APG12"	"YBR217W"	19040	14970	130	5207	4557	1716	73	614	4443	71	0	0	5990	5170	1968	126	429	2707	82	65	0	0.876	0.889	0.891	0.925	1.368	1.428	0.881	120	615	10998	9528	-0.192	5134	5864	4484	5044	0
4	16	1	"SLI15"	"YBR156C"	19240	14960	130	11616	10348	4111	112	173	177	99	97	0	9159	8056	3360	154	194	139	97	96	0	1.278	1.295	1.294	1.400	1.401	1.284	0.976	120	688	20509	18138	0.353	11504	9005	10236	7902	0
4	17	1	"YBR187W"	"YBR187W"	19440	14970	120	3063	2934	1329	259	384	391	93	90	0	2878	2866	1305	244	323	270	93	90	0	1.065	1.020	1.015	1.017	1.475	1.027	0.942	120	643	5438	5297	0.090	2804	2634	2675	2622	-100
4	18	1	"YBR219C"	"YBR219C"	19660	14970	150	6167	5183	3431	805	7257	17053	0	0	0	2159	2278	3590	561	5141	13458	1	0	0	3.355	2.550	3.137	2.890	2.022	1.259	0.896	156	807	6960	6095	1.747	5362	1598	4378	1717	-100
4	19	1	"ICS4"	"YBR158W"	19860	14970	150	15622	26102	22911	1704	11263	20243	43	27	8	8141	16890	17355	1080	7907	16285	35	21	1	1.971	1.543	1.634	1.736	1.779	1.294	0.858	156	687	20979	40208	0.979	13918	7061	24398	15810	-100
4	20	1	"RPS9B"	"YBR189W"	20020	15000	160	11364	25077	23870	2276	7139	14491	41	33	14	11634	19489	19154	1326	4762	11292	44	28	3	0.882	1.255	1.163	1.201	1.858	1.245	0.903	208	791	19396	40964	-0.182	9088	10308	22801	18163	-100
4	21	1	"PDB1"	"YBR221C"	20240	14960	120	8736	8286	2983	2672	3897	5057	69	3	0	3633	3511	1273	1507	2245	2883	23	0	0	2.852	2.801	2.724	2.598	1.441	1.925	0.859	120	661	8190	7618	1.512	6064	2126	5614	2004	-100
4	1	2	"CDC28"	"YBR160W"	16250	15160	140	10910	9905	3667	59	76	89	100	100	0	5539	4963	1842	115	125	73	100	100	0	2.001	2.031	2.011	2.051	1.281	2.046	0.967	156	711	16275	14694	1.000	10851	5424	9846	4848	0
4	2	2	"RPL21A"	"YBR191W"	16450	15160	130	4885	4458	1760	61	71	41	100	100	0	3171	2862	1122	113	118	40	100	97	0	1.578	1.599	1.596	1.662	1.358	1.586	0.960	120	545	7882	7146	0.658	4824	3058	4397	2749	0
4	3	2	"YBR223C"	"YBR223C"	16650	15160	140	5698	4813	2220	61	70	39	100	100	0	1380	1173	562	109	117	41	93	89	0	4.435	4.466	4.506	4.955	1.517	4.448	0.943	156	596	6908	5816	2.149	5637	1271	4752	1064	0
4	4	2	"RPN4"	"YDL020C"	16850	15160	130	1441	1525	705	60	66	29	100	99	0	1826	1826	820	109	117	34	95	95	0	0.804	0.853	0.833	0.942	1.800	0.857	0.932	120	541	3098	3182	-0.314	1381	1717	1465	1717	0
4	5	2	"SLC1"	"YDL052C"	17050	15160	140	1618	1518	724	59	67	32	100	100	0	921	843	381	113	120	39	94	91	0	1.929	1.999	1.953	2.191	1.707	2.011	0.925	156	599	2367	2189	0.948	1559	808	1459	730	0
4	6	2	"SUB2"	"YDL084W"	17240	15160	130	2434	2337	964	58	63	26	100	100	0	3201	3039	1200	110	115	28	98	96	0	0.769	0.778	0.774	0.838	1.555	0.779	0.941	120	579	5467	5208	-0.380	2376	3091	2279	2929	0
4	7	2	"GPD1"	"YDL022W"	17450	15160	130	3559	3260	1276	61	71	52	100	99	0	2042	1843	730	114	120	52	96	95	0	1.814	1.850	1.873	2.028	1.700	1.832	0.963	120	629	5426	4928	0.859	3498	1928	3199	1729	0
4	8	2	"YDL054C"	"YDL054C"	17660	15170	140	6021	5523	2341	67	177	506	96	93	0	2672	2487	1066	119	166	222	94	92	0	2.332	2.304	2.273	2.396	1.298	2.299	0.960	156	660	8507	7824	1.222	5954	2553	5456	2368	-100
4	9	2	"YDL086W"	"YDL086W"	17860	15160	150	914	1430	1222	64	183	534	58	46	0	426	650	516	116	169	233	53	44	0	2.742	2.558	2.566	2.647	2.228	2.416	0.965	156	588	1160	1900	1.455	850	310	1366	534	-50
4	10	2	"YDL024C"	"YDL024C"	18050	15170	140	4787	4189	1792	61	66	25	100	100	0	2040	1828	748	114	120	41	96	95	0	2.454	2.408	2.429	2.427	1.490	2.446	0.962	156	589	6652	5842	1.295	4726	1926	4128	1714	0
4	11	2	"MBP1"	"YDL056W"	18250	15160	130	1566	1434	606	62	101	288	92	85	0	1743	1604	694	117	153	418	88	79	0	0.925	0.923	0.932	0.977	1.520	0.912	0.944	120	576	3130	2859	-0.113	1504	1626	1372	1487	0
4	12	2	"ASM4"	"YDL088C"	18450	15170	130	1850	1820	789	60	88	229	98	91	0	1513	1417	620	114	140	353	89	83	0	1.279	1.351	1.353	1.445	1.428	1.355	0.957	120	596	3189	3063	0.356	1790	1399	1760	1303	0
4	13	2	"YDL026W"	"YDL026W"	18640	15160	140	4943	4063	1847	60	67	30	100	99	0	2353	1995	913	116	121	31	97	94	0	2.183	2.130	2.126	2.344	1.621	2.130	0.967	156	652	7120	5882	1.126	4883	2237	4003	1879	0
4	14	2	"USO1"	"YDL058W"	18840	15160	130	3544	3290	1356	65	586	4496	13	0	0	2687	2399	980	122	415	2765	33	0	0	1.356	1.416	1.427	1.512	1.549	1.424	0.965	120	583	6044	5502	0.440	3479	2565	3225	2277	0
4	15	2	"RAM1"	"YDL090C"	19050	15150	160	3414	3117	2363	69	495	3941	38	2	0	2400	2199	1686	126	364	2400	47	2	0	1.471	1.470	1.470	1.575	1.785	1.596	0.949	208	784	5619	5121	0.557	3345	2274	3048	2073	0
4	16	2	"CPH1"	"YDR155C"	19260	15170	130	1575	1497	495	76	98	89	100	96	0	857	817	269	129	144	75	94	92	0	2.059	2.065	2.037	2.224	1.468	2.090	0.923	120	620	2227	2109	1.042	1499	728	1421	688	0
4	17	2	"YDR186C"	"YDR186C"	19490	15190	160	1708	12670	20842	132	1012	4770	33	28	6	1255	8359	15307	163	706	3018	29	26	2	1.443	1.530	1.537	1.716	2.113	1.407	0.894	208	697	2668	20734	0.529	1576	1092	12538	8196	-100
4	18	2	"SPR28"	"YDR218C"	19660	15170	150	1257	1830	3079	434	3967	12155	1	0	0	863	1211	2009	340	2844	9377	1	0	0	1.574	1.603	1.589	1.674	1.742	1.335	0.896	156	550	1346	2267	0.654	823	523	1396	871	-100
4	19	2	"YDR157W"	"YDR157W"	19860	15170	150	7369	19991	21827	775	7752	17611	37	25	8	3384	13210	16930	549	5508	13818	31	16	1	2.326	1.518	1.835	1.898	1.557	1.277	0.898	156	539	9429	31877	1.218	6594	2835	19216	12661	-100
4	20	2	"CCT6"	"YDR188W"	20060	15170	150	7065	18965	22625	1784	7399	15457	27	21	14	3207	13008	19258	1026	4939	12149	24	18	4	2.421	1.434	2.125	2.003	1.604	1.249	0.886	156	636	7462	29163	1.276	5281	2181	17181	11982	-100
4	21	2	"YDR220C"	"YDR220C"	20290	15140	130	9819	21135	22343	2265	7760	14636	38	28	6	4492	12708	15560	1241	4852	10580	35	23	0	2.324	1.646	1.998	2.095	2.245	1.419	0.879	120	756	10805	30337	1.216	7554	3251	18870	11467	-100
4	1	3	"SAC3"	"YDR159W"	16260	15360	130	8634	7794	3343	59	80	89	100	100	0	3986	3603	1431	115	127	55	97	95	0	2.215	2.218	2.198	2.283	1.402	2.251	0.969	120	655	12446	11223	1.147	8575	3871	7735	3488	0
4	2	3	"RVB1"	"YDR190C"	16460	15370	130	2750	2579	966	61	82	92	100	99	0	4253	3947	1601	114	126	57	100	99	0	0.650	0.657	0.647	0.694	1.364	0.645	0.960	120	615	6828	6351	-0.622	2689	4139	2518	3833	0
4	3	3	"YDR222W"	"YDR222W"	16660	15360	130	3006	2789	1133	60	69	39	99	99	0	1278	1194	442	109	117	49	95	93	0	2.520	2.515	2.499	2.585	1.467	2.530	0.935	120	596	4115	3814	1.333	2946	1169	2729	1085	0
4	4	3	"TCI1"	"YDR161W"	16860	15360	130	5094	4475	1648	59	68	39	100	100	0	8479	7453	2801	108	114	36	100	100	0	0.601	0.601	0.604	0.616	1.272	0.593	0.973	120	594	13406	11761	-0.733	5035	8371	4416	7345	0
4	5	3	"NUP42"	"YDR192C"	17060	15370	140	5477	4816	1923	58	67	38	100	100	0	4616	4059	1670	109	114	35	99	98	0	1.202	1.205	1.207	1.264	1.405	1.196	0.966	156	630	9926	8708	0.266	5419	4507	4758	3950	0
4	6	3	"HTB1"	"YDR224C"	17260	15360	130	3067	2736	1146	58	66	31	100	100	0	3393	3005	1293	108	114	32	100	100	0	0.916	0.924	0.945	0.989	1.396	0.905	0.963	120	595	6294	5575	-0.127	3009	3285	2678	2897	0
4	7	3	"PAD1"	"YDR538W"	17460	15360	130	2004	1859	834	60	69	53	99	97	0	1581	1448	613	111	118	52	95	94	0	1.322	1.346	1.344	1.404	1.463	1.348	0.957	120	615	3414	3136	0.403	1944	1470	1799	1337	0
4	8	3	"RIP1"	"YEL024W"	17660	15370	130	3613	3372	1306	66	87	125	100	98	0	2185	2031	785	114	126	70	96	95	0	1.713	1.725	1.729	1.821	1.438	1.712	0.963	120	559	5618	5223	0.776	3547	2071	3306	1917	0
4	9	3	"HAT2"	"YEL056W"	17860	15370	140	2083	1951	939	64	118	350	89	86	0	2140	2002	1161	112	137	158	93	90	0	0.996	0.998	1.034	1.059	1.696	0.929	0.803	156	585	4047	3777	-0.006	2019	2028	1887	1890	0
4	10	3	"YDR540C"	"YDR540C"	18060	15370	140	2440	2205	1059	59	65	26	100	99	0	1924	1733	830	109	115	29	96	96	0	1.312	1.321	1.324	1.410	1.573	1.313	0.966	156	567	4196	3770	0.392	2381	1815	2146	1624	0
4	11	3	"SNU13"	"YEL026W"	18260	15370	140	3467	3105	1306	59	68	38	100	100	0	7257	6331	2842	111	126	209	97	93	0	0.477	0.490	0.489	0.524	1.450	0.476	0.968	156	642	10554	9266	-1.068	3408	7146	3046	6220	0
4	12	3	"PCM1"	"YEL058W"	18470	15370	130	4554	4246	1623	61	70	42	100	100	0	3162	2918	1119	113	129	219	93	93	0	1.474	1.492	1.483	1.626	1.499	1.486	0.963	120	590	7542	6990	0.559	4493	3049	4185	2805	0
4	13	3	"YDR542W"	"YDR542W"	18670	15370	140	15303	13508	6056	62	69	32	100	100	0	10423	9372	4227	114	120	37	100	100	0	1.478	1.452	1.475	1.502	1.411	1.456	0.971	156	640	25550	22704	0.564	15241	10309	13446	9258	0
4	14	3	"YEL028W"	"YEL028W"	18860	15370	130	1833	1773	619	64	76	43	100	100	0	1553	1487	548	118	125	40	99	97	0	1.233	1.248	1.238	1.324	1.397	1.224	0.948	120	591	3204	3078	0.302	1769	1435	1709	1369	0
4	15	3	"YEL059W"	"YEL059W"	19070	15370	130	1396	1781	1519	66	82	61	100	95	0	1295	1584	1298	120	129	44	95	94	0	1.132	1.171	1.170	1.183	1.410	1.155	0.918	120	605	2505	3179	0.179	1330	1175	1715	1464	0
4	16	3	"YDR544C"	"YDR544C"	19270	15370	130	42767	39342	15529	72	89	66	100	100	0	18565	16399	6564	126	136	49	100	100	0	2.315	2.413	2.419	2.512	1.303	2.425	0.976	120	628	61134	55543	1.211	42695	18439	39270	16273	0
4	17	3	"ECM10"	"YEL030W"	19480	15370	130	7724	13778	14905	93	1071	4858	85	32	3	8533	11565	10581	139	743	3106	89	80	0	0.909	1.198	0.968	1.087	1.479	1.373	0.898	120	510	16025	25111	-0.137	7631	8394	13685	11426	0
4	18	3	"CIN8"	"YEL061C"	19670	15370	120	1801	1859	1043	245	1626	5602	1	0	0	1746	1669	824	211	1084	3560	0	0	0	1.014	1.107	1.041	1.162	1.825	1.663	0.929	120	508	3091	3072	0.020	1556	1535	1614	1458	-100
4	19	3	"YFR022W"	"YFR022W"	19870	15370	130	10003	8947	3450	446	659	910	93	90	0	12373	10898	4253	326	480	603	94	92	0	0.793	0.804	0.816	0.864	1.612	0.799	0.950	120	573	21604	19073	-0.334	9557	12047	8501	10572	-100
4	20	3	"RPN12"	"YFR052W"	20060	15380	130	4918	4524	1854	762	1116	1678	83	72	0	3157	2887	1244	498	704	799	84	80	0	1.563	1.575	1.557	1.587	1.294	1.833	0.860	120	564	6815	6151	0.644	4156	2659	3762	2389	-100
4	21	3	"CWH41"	"YGL027C"	20250	15380	130	12848	11936	4081	1446	3146	7162	82	7	0	8998	8091	2914	824	1924	5159	79	3	0	1.395	1.444	1.432	1.474	1.314	1.328	0.940	120	701	19576	17757	0.480	11402	8174	10490	7267	-100
4	1	4	"YFR024C"	"YFR024C"	16260	15560	140	8882	7179	3528	58	69	55	100	99	0	12334	10510	4972	112	120	55	99	99	0	0.722	0.685	0.682	0.688	1.403	0.686	0.961	156	797	21046	17519	-0.470	8824	12222	7121	10398	0
4	2	4	"YFR054C"	"YFR054C"	16470	15560	130	3746	3177	1320	60	66	30	100	100	0	5484	4609	1910	114	120	44	100	98	0	0.686	0.693	0.695	0.719	1.287	0.686	0.965	120	611	9056	7612	-0.543	3686	5370	3117	4495	0
4	3	4	"CGR1"	"YGL029W"	16670	15560	130	2557	2246	924	60	68	36	100	100	0	4374	3755	1542	110	119	50	98	95	0	0.586	0.600	0.606	0.646	1.452	0.597	0.964	120	596	6761	5831	-0.772	2497	4264	2186	3645	0
4	4	4	"HIS2"	"YFR025C"	16870	15570	140	5740	4784	2236	58	66	39	100	100	0	4098	3454	1621	110	116	41	99	97	0	1.425	1.413	1.431	1.500	1.467	1.412	0.964	156	643	9670	8070	0.511	5682	3988	4726	3344	0
4	5	4	"YFR056C"	"YFR056C"	17070	15570	140	2147	1838	841	58	66	38	100	100	0	1365	1216	539	109	114	38	96	94	0	1.663	1.608	1.603	1.694	1.534	1.607	0.966	156	581	3345	2887	0.734	2089	1256	1780	1107	0
4	6	4	"RPL24A"	"YGL031C"	17270	15570	140	2750	2463	1035	59	69	38	100	100	0	2671	2332	1004	111	116	36	98	98	0	1.051	1.082	1.076	1.146	1.317	1.065	0.965	156	651	5251	4625	0.072	2691	2560	2404	2221	0
4	7	4	"ECO1"	"YFR027W"	17470	15560	130	7188	6562	2675	59	67	37	100	100	0	4956	4509	1817	112	117	33	100	100	0	1.472	1.479	1.487	1.541	1.347	1.466	0.970	120	576	11973	10900	0.558	7129	4844	6503	4397	0
4	8	4	"YGL001C"	"YGL001C"	17670	15570	140	4389	3833	1683	61	71	33	100	100	0	9717	8279	3787	113	118	28	100	100	0	0.451	0.462	0.457	0.501	1.461	0.452	0.969	156	629	13932	11938	-1.150	4328	9604	3772	8166	0
4	9	4	"HOP2"	"YGL033W"	17870	15570	140	4632	4050	1847	63	71	30	100	100	0	2791	2495	1122	113	118	29	97	96	0	1.706	1.674	1.718	1.758	1.433	1.679	0.966	156	592	7247	6369	0.771	4569	2678	3987	2382	0
4	10	4	"MRP13"	"YGR084C"	18070	15570	140	7789	6313	3005	59	67	31	100	99	0	4355	3599	1667	110	115	28	98	98	0	1.821	1.792	1.792	1.888	1.429	1.810	0.974	156	588	11975	9743	0.865	7730	4245	6254	3489	0
4	11	4	"SPT6"	"YGR116W"	18270	15570	140	999	897	455	60	70	42	98	94	0	1007	929	456	110	125	212	87	74	0	1.047	1.022	0.987	1.052	1.512	1.014	0.929	156	626	1836	1656	0.066	939	897	837	819	0
4	12	4	"RPL24B"	"YGR148C"	18470	15570	130	4703	3983	1672	61	71	38	100	100	0	3255	2719	1163	111	127	215	90	89	0	1.476	1.504	1.531	1.630	1.340	1.497	0.941	120	610	7786	6530	0.562	4642	3144	3922	2608	0
4	13	4	"YGR086C"	"YGR086C"	18670	15570	130	5603	4845	1939	64	72	34	100	100	0	2010	1764	727	113	119	38	96	95	0	2.920	2.896	2.909	3.020	1.312	2.882	0.965	120	577	7436	6432	1.546	5539	1897	4781	1651	0
4	14	4	"RPS23A"	"YGR118W"	18870	15570	140	6386	5538	2453	63	75	70	100	100	0	5651	4848	2154	111	121	74	98	96	0	1.141	1.156	1.167	1.208	1.401	1.150	0.972	156	637	11863	10212	0.191	6323	5540	5475	4737	0
4	15	4	"YGR150C"	"YGR150C"	19070	15570	140	1327	1531	969	64	75	45	98	95	0	1297	1435	862	114	122	51	94	93	0	1.068	1.111	1.120	1.178	1.671	1.115	0.956	156	644	2446	2788	0.094	1263	1183	1467	1321	0
4	16	4	"CTT1"	"YGR088W"	19280	15570	130	9770	8554	2966	72	465	2239	92	87	0	3266	2893	1042	124	340	1405	86	61	0	3.087	3.063	3.060	3.273	1.365	2.810	0.903	120	575	12840	11251	1.626	9698	3142	8482	2769	0
4	17	4	"SEC35"	"YGR120C"	19470	15570	140	6076	5143	2346	82	868	4059	71	0	0	2598	2170	951	132	587	2486	47	0	0	2.431	2.483	2.508	2.542	1.390	1.994	0.876	156	648	8460	7099	1.281	5994	2466	5061	2038	0
4	18	4	"RSR1"	"YGR152C"	19680	15570	130	6325	5517	2265	92	996	5521	62	0	0	3692	3174	1322	135	648	3668	45	0	0	1.752	1.785	1.774	1.838	1.249	1.571	0.895	120	548	9790	8464	0.809	6233	3557	5425	3039	0
4	19	4	"YGR090W"	"YGR090W"	19860	15590	170	4361	4472	5688	173	1078	5502	26	3	0	3251	3369	5285	181	689	3843	34	2	0	1.364	1.348	1.346	1.479	1.793	1.235	0.919	208	725	7258	7487	0.448	4188	3070	4299	3188	-100
4	20	4	"YGR122W"	"YGR122W"	20070	15570	130	5827	6438	4951	450	893	3249	83	21	0	3166	3404	2631	316	606	2612	61	6	0	1.887	1.939	1.961	1.956	1.531	1.502	0.938	120	536	8227	9076	0.916	5377	2850	5988	3088	-100
4	21	4	"YGR154C"	"YGR154C"	20270	15570	150	4213	4141	2053	1120	4934	11553	0	0	0	1972	1885	919	667	3171	8344	0	0	0	2.370	2.480	2.418	2.451	1.410	1.369	0.904	156	851	4398	4239	1.245	3093	1305	3021	1218	-100
4	1	5	"ORC6"	"YHR118C"	16280	15770	130	2821	2711	1251	57	63	26	100	99	0	3009	2845	1367	107	116	69	99	95	0	0.952	0.969	0.980	1.029	1.333	0.964	0.971	120	676	5666	5392	-0.070	2764	2902	2654	2738	0
4	2	5	"IMP3"	"YHR148W"	16480	15770	130	1571	1420	535	57	65	33	100	100	0	3093	2748	1095	109	115	35	100	100	0	0.507	0.516	0.521	0.554	1.312	0.502	0.976	120	612	4498	4002	-0.979	1514	2984	1363	2639	0
4	3	5	"YHR180W"	"YHR180W"	16680	15760	120	1492	2054	1523	57	64	34	100	100	0	1191	1740	1257	107	114	41	95	93	0	1.324	1.223	1.227	1.360	1.581	1.220	0.977	120	559	2519	3630	0.405	1435	1084	1997	1633	0
4	4	5	"MSH1"	"YHR120W"	16880	15770	130	1491	1465	733	56	62	27	100	100	0	1385	1397	739	107	111	29	96	95	0	1.123	1.092	1.108	1.241	1.540	1.045	0.940	120	578	2713	2699	0.167	1435	1278	1409	1290	0
4	5	5	"YHR150W"	"YHR150W"	17080	15770	140	2246	2110	1046	58	65	31	100	100	0	1159	1106	550	109	116	34	96	95	0	2.084	2.058	2.067	2.286	1.608	1.947	0.859	156	593	3238	3049	1.059	2188	1050	2052	997	0
4	6	5	"YHR182W"	"YHR182W"	17270	15770	130	677	718	457	59	66	33	99	95	0	1109	1144	728	111	116	34	95	92	0	0.619	0.638	0.642	0.677	1.556	0.635	0.952	120	554	1616	1692	-0.691	618	998	659	1033	0
4	7	5	"YHR122W"	"YHR122W"	17480	15770	140	1689	1597	828	60	70	38	100	96	0	976	922	448	113	118	32	92	92	0	1.888	1.900	1.931	1.984	1.435	1.898	0.965	156	684	2492	2346	0.917	1629	863	1537	809	0
4	8	5	"SPO12"	"YHR152W"	17680	15770	130	3318	3047	1248	59	68	33	100	100	0	2015	1863	776	114	120	40	100	96	0	1.714	1.708	1.711	1.864	1.395	1.704	0.975	120	558	5160	4737	0.778	3259	1901	2988	1749	0
4	9	5	"SSP1"	"YHR184W"	17880	15770	130	1699	1600	612	60	68	31	100	100	0	1792	1655	637	113	120	42	95	95	0	0.976	0.999	0.980	1.081	1.505	0.984	0.973	120	595	3318	3082	-0.035	1639	1679	1540	1542	0
4	10	5	"NDT80"	"YHR124W"	18080	15770	130	3919	3570	1455	59	68	33	100	100	0	1655	1486	571	110	114	29	95	95	0	2.498	2.552	2.578	2.708	1.409	2.577	0.974	120	592	5405	4887	1.321	3860	1545	3511	1376	0
4	11	5	"ESC4"	"YHR154W"	18290	15770	130	2172	2142	1037	58	67	37	99	95	0	1479	1420	655	107	111	33	92	91	0	1.541	1.587	1.581	1.649	1.305	1.590	0.975	120	596	3486	3397	0.624	2114	1372	2084	1313	0
4	12	5	"YHR186C"	"YHR186C"	18480	15780	130	767	902	569	60	69	37	98	95	0	680	812	466	107	114	34	93	92	0	1.234	1.194	1.180	1.218	1.453	1.200	0.950	120	598	1280	1547	0.303	707	573	842	705	0
4	13	5	"YJL058C"	"YJL058C"	18680	15770	130	6923	6168	2535	64	74	40	100	100	0	10461	9326	3956	114	120	35	100	99	0	0.663	0.663	0.659	0.699	1.261	0.659	0.984	120	615	17206	15316	-0.593	6859	10347	6104	9212	0
4	14	5	"DPB11"	"YJL090C"	18880	15770	130	7949	6946	2767	64	78	81	100	100	0	3407	2941	1194	111	129	165	93	92	0	2.392	2.432	2.450	2.591	1.397	2.418	0.972	120	576	11181	9712	1.258	7885	3296	6882	2830	0
4	15	5	"YJL122W"	"YJL122W"	19080	15770	140	5696	4807	2219	63	72	48	100	100	0	1720	1462	680	112	126	148	87	87	0	3.503	3.514	3.554	3.740	1.366	3.479	0.976	156	636	7241	6094	1.809	5633	1608	4744	1350	0
4	16	5	"YJL060W"	"YJL060W"	19280	15770	130	5854	5101	1885	69	442	2228	87	75	0	5554	4753	1771	120	323	1396	90	84	0	1.065	1.086	1.079	1.165	1.385	1.075	0.985	120	576	11219	9665	0.090	5785	5434	5032	4633	0
4	17	5	"HPR5"	"YJL092W"	19480	15770	140	10071	8516	3639	72	418	2081	91	82	0	7170	6020	2737	121	308	1305	90	81	0	1.418	1.431	1.415	1.560	1.364	1.426	0.973	156	670	17048	14343	0.504	9999	7049	8444	5899	0
4	18	5	"LSM1"	"YJL124C"	19680	15780	130	6737	5952	2126	72	738	5262	79	0	0	3154	2808	999	125	495	3479	7	0	0	2.200	2.192	2.205	2.268	1.227	2.188	0.982	120	588	9694	8563	1.138	6665	3029	5880	2683	0
4	19	5	"LAS21"	"YJL062W"	19880	15770	130	11996	10617	4248	89	997	6060	83	47	0	5068	4463	1825	134	704	4498	58	0	0	2.413	2.432	2.446	2.630	1.388	1.829	0.857	120	498	16841	14857	1.271	11907	4934	10528	4329	0
4	20	5	"YJL094C"	"YJL094C"	20070	15770	150	11390	12367	10810	138	482	2878	90	78	1	11130	10804	7012	159	366	2310	90	82	0	1.026	1.149	1.051	1.127	1.372	1.381	0.919	156	683	22223	22874	0.036	11252	10971	12229	10645	0
4	21	5	"NIT2"	"YJL126W"	20280	15780	130	11426	10029	3416	421	663	770	97	95	0	6335	5533	1912	313	469	558	96	94	0	1.827	1.841	1.838	1.878	1.204	1.861	0.978	120	674	17027	14828	0.870	11005	6022	9608	5220	0
4	1	6	"YJL064W"	"YJL064W"	16290	15970	140	3087	2777	1207	54	61	27	100	100	0	1796	1619	718	105	112	53	98	96	0	1.794	1.799	1.852	1.933	1.508	1.786	0.958	156	783	4724	4237	0.843	3033	1691	2723	1514	0
4	2	6	"MRPL49"	"YJL096W"	16500	15970	140	3888	3551	1507	55	61	27	100	100	0	2077	1925	828	105	109	29	100	99	0	1.944	1.921	1.912	1.986	1.438	1.915	0.967	156	626	5805	5316	0.959	3833	1972	3496	1820	0
4	3	6	"PBS2"	"YJL128C"	16690	15970	140	5105	4716	2182	54	60	25	100	100	0	2617	2318	1097	103	108	29	100	98	0	2.009	2.105	2.120	2.305	1.528	2.096	0.965	156	638	7565	6877	1.007	5051	2514	4662	2215	0
4	4	6	"YKL054C"	"YKL054C"	16890	15970	120	360	433	268	54	60	27	98	95	0	417	461	263	103	109	32	92	92	0	0.975	1.059	1.043	1.128	1.738	1.043	0.864	120	509	620	737	-0.037	306	314	379	358	0
4	5	6	"YKL086W"	"YKL086W"	17090	15970	140	3804	3978	2168	57	65	32	100	100	0	2376	2321	1187	111	119	38	96	95	0	1.654	1.774	1.725	1.965	1.721	1.819	0.941	156	611	6012	6131	0.726	3747	2265	3921	2210	0
4	6	6	"SBA1"	"YKL117W"	17290	15970	130	2792	2712	1251	58	65	30	100	100	0	3416	3345	1589	112	119	34	99	95	0	0.827	0.821	0.808	0.919	1.583	0.807	0.974	120	612	6038	5887	-0.273	2734	3304	2654	3233	0
4	7	6	"YKL056C"	"YKL056C"	17500	15970	130	1637	1468	647	59	67	31	99	96	0	1148	1017	441	113	116	27	94	93	0	1.525	1.559	1.551	1.684	1.494	1.539	0.962	120	591	2613	2313	0.608	1578	1035	1409	904	0
4	8	6	"YKL088W"	"YKL088W"	17690	15970	140	6783	6194	3027	58	70	85	100	98	0	4351	3852	1907	113	121	77	94	92	0	1.587	1.641	1.642	1.880	1.738	1.630	0.977	156	628	10963	9875	0.666	6725	4238	6136	3739	0
4	9	6	"VPH2"	"YKL119C"	17890	15970	130	2616	2414	1001	59	72	87	95	93	0	3378	3023	1223	113	122	80	93	93	0	0.783	0.809	0.813	0.838	1.349	0.805	0.974	120	593	5822	5265	-0.353	2557	3265	2355	2910	0
4	10	6	"TOA2"	"YKL058W"	18090	15970	140	3752	3238	1375	59	69	36	100	98	0	5319	4450	2046	109	114	29	99	97	0	0.709	0.732	0.730	0.819	1.538	0.712	0.972	156	689	8903	7520	-0.496	3693	5210	3179	4341	0
4	11	6	"YKL090W"	"YKL090W"	18290	15970	130	1507	1455	614	57	67	37	100	98	0	771	732	274	107	112	36	95	94	0	2.184	2.237	2.208	2.271	1.379	2.324	0.925	120	579	2114	2023	1.127	1450	664	1398	625	0
4	12	6	"YKL121W"	"YKL121W"	18480	15970	130	1382	1366	633	58	68	40	99	95	0	1033	971	456	104	109	34	93	91	0	1.425	1.509	1.500	1.641	1.578	1.493	0.945	120	596	2253	2175	0.511	1324	929	1308	867	0
4	13	6	"FBA1"	"YKL060C"	18690	15970	130	2142	1938	867	61	73	43	100	99	0	4102	3649	1738	109	116	37	95	94	0	0.521	0.530	0.530	0.593	1.730	0.513	0.961	120	610	6074	5417	-0.940	2081	3993	1877	3540	0
4	14	6	"BUD2"	"YKL092C"	18900	15980	140	3045	2913	1277	61	71	49	99	98	0	3839	3521	1612	108	120	142	94	94	0	0.800	0.836	0.856	0.924	1.614	0.819	0.959	156	659	6715	6265	-0.322	2984	3731	2852	3413	0
4	15	6	"YKL123W"	"YKL123W"	19090	15970	130	2117	1878	868	63	76	56	95	93	0	3458	2999	1457	111	126	156	91	90	0	0.614	0.628	0.630	0.685	1.479	0.614	0.967	120	540	5401	4703	-0.704	2054	3347	1815	2888	0
4	16	6	"RIC1"	"YLR039C"	19280	15970	130	2899	2610	1235	66	79	70	100	97	0	1902	1731	831	114	120	35	95	95	0	1.584	1.573	1.586	1.678	1.429	1.564	0.969	120	596	4621	4161	0.664	2833	1788	2544	1617	0
4	17	6	"RGR1"	"YLR071C"	19480	15980	130	2973	2888	1414	67	105	269	96	95	0	1597	1549	741	112	137	207	92	90	0	1.957	1.963	1.942	2.052	1.474	1.963	0.962	120	611	4391	4258	0.969	2906	1485	2821	1437	0
4	18	6	"CDC45"	"YLR103C"	19680	15980	130	4253	3807	1706	67	289	1297	87	76	0	3430	3121	1444	116	259	845	86	80	0	1.263	1.245	1.261	1.346	1.432	1.251	0.893	120	597	7500	6745	0.337	4186	3314	3740	3005	0
4	19	6	"YLR041W"	"YLR041W"	19880	15970	130	2460	2211	841	70	141	819	88	77	0	1634	1465	581	124	168	576	85	73	0	1.583	1.597	1.609	1.735	1.556	1.563	0.959	120	645	3900	3482	0.662	2390	1510	2141	1341	0
4	20	6	"YLR073C"	"YLR073C"	20090	15980	130	3254	2981	1373	76	96	73	100	100	0	2669	2391	1132	127	139	66	97	96	0	1.250	1.283	1.279	1.390	1.391	1.289	0.967	120	592	5720	5169	0.322	3178	2542	2905	2264	0
4	21	6	"SEN2"	"YLR105C"	20290	15980	140	8618	7442	3252	104	209	449	98	96	0	6423	5630	2479	145	211	445	96	92	0	1.356	1.338	1.351	1.373	1.324	1.326	0.972	156	788	14792	12823	0.440	8514	6278	7338	5485	0
4	1	7	"TRX1"	"YLR043C"	16290	16170	130	1702	1516	664	54	61	29	100	100	0	2377	1976	963	104	114	137	91	89	0	0.725	0.781	0.798	0.886	1.570	0.748	0.959	120	658	3921	3334	-0.464	1648	2273	1462	1872	0
4	2	7	"RPL10"	"YLR075W"	16490	16170	130	2157	1968	842	55	63	30	100	100	0	1525	1386	624	101	107	34	98	95	0	1.476	1.489	1.496	1.638	1.503	1.457	0.954	120	594	3526	3198	0.562	2102	1424	1913	1285	0
4	3	7	"YLR107W"	"YLR107W"	16690	16170	130	2313	2106	905	55	63	31	100	98	0	1392	1314	597	102	107	28	94	94	0	1.750	1.692	1.691	1.795	1.416	1.652	0.962	120	560	3548	3263	0.808	2258	1290	2051	1212	0
4	4	7	"STU2"	"YLR045C"	16890	16170	140	9904	8423	3528	56	133	1183	94	87	0	5906	4842	2262	107	193	1294	85	76	0	1.698	1.767	1.743	1.933	1.554	1.731	0.964	156	629	15647	13102	0.764	9848	5799	8367	4735	0
4	5	7	"YLR077W"	"YLR077W"	17090	16170	140	6202	5538	2748	58	139	1214	89	81	0	5543	4768	2646	114	206	1328	83	71	0	1.132	1.177	1.201	1.304	1.597	1.139	0.951	156	597	11573	10134	0.178	6144	5429	5480	4654	0
4	6	7	"AHP1"	"YLR109W"	17290	16170	130	3104	2765	1180	60	69	34	100	99	0	1362	1263	512	115	121	34	96	95	0	2.441	2.356	2.360	2.511	1.536	2.355	0.967	120	611	4291	3853	1.288	3044	1247	2705	1148	0
4	7	7	"YLR422W"	"YLR422W"	17500	16180	130	1510	1361	666	58	66	32	97	95	0	1313	1191	578	114	120	53	94	90	0	1.211	1.210	1.214	1.286	1.585	1.192	0.954	120	593	2651	2380	0.276	1452	1199	1303	1077	0
4	8	7	"YLR454W"	"YLR454W"	17690	16170	140	1203	1208	595	57	69	87	94	92	0	999	955	478	113	123	85	91	88	0	1.293	1.367	1.357	1.447	1.472	1.334	0.945	156	633	2032	1993	0.371	1146	886	1151	842	0
4	9	7	"PPZ1"	"YML016C"	17880	16180	130	4189	3931	2021	58	65	34	100	100	0	5806	5268	2740	109	114	34	99	99	0	0.725	0.751	0.773	0.806	1.435	0.739	0.971	120	594	9828	9032	-0.464	4131	5697	3873	5159	0
4	10	7	"YLR424W"	"YLR424W"	18090	16180	130	7065	6289	2785	59	67	30	100	100	0	5485	4890	2215	107	111	31	100	98	0	1.303	1.303	1.312	1.406	1.424	1.292	0.978	120	596	12384	11013	0.382	7006	5378	6230	4783	0
4	11	7	"YLR456W"	"YLR456W"	18280	16170	130	2422	2077	941	60	72	49	100	97	0	3125	2593	1339	107	115	56	94	93	0	0.783	0.811	0.805	0.995	1.882	0.781	0.956	120	615	5380	4503	-0.354	2362	3018	2017	2486	0
4	12	7	"YML018C"	"YML018C"	18500	16180	140	3722	3294	1630	58	70	52	100	100	0	3502	3027	1585	106	112	55	96	94	0	1.079	1.108	1.107	1.278	1.622	1.084	0.969	156	658	7060	6157	0.110	3664	3396	3236	2921	0
4	13	7	"YLR426W"	"YLR426W"	18690	16170	140	5475	4464	2138	60	69	39	100	100	0	2698	2196	1152	108	111	31	96	94	0	2.091	2.109	2.106	2.492	1.825	2.057	0.961	156	643	8005	6492	1.064	5415	2590	4404	2088	0
4	14	7	"YLR458W"	"YLR458W"	18900	16180	130	2172	1924	862	60	66	27	99	99	0	1904	1642	765	103	108	39	95	93	0	1.173	1.211	1.208	1.291	1.431	1.192	0.959	120	541	3913	3403	0.230	2112	1801	1864	1539	0
4	15	7	"YML020W"	"YML020W"	19090	16180	140	6294	5891	2891	61	71	37	100	100	0	3934	3580	1833	105	113	44	98	96	0	1.628	1.678	1.669	1.841	1.550	1.662	0.969	156	608	10062	9305	0.703	6233	3829	5830	3475	0
4	16	7	"YLR428C"	"YLR428C"	19290	16180	140	3425	2879	1378	63	73	40	99	98	0	1964	1640	765	108	115	31	96	93	0	1.811	1.838	1.848	1.933	1.536	1.844	0.964	156	613	5218	4348	0.857	3362	1856	2816	1532	0
4	17	7	"YLR460C"	"YLR460C"	19480	16180	130	9903	9001	4471	63	75	81	100	100	0	5325	4532	2340	111	122	109	95	91	0	1.887	2.022	2.015	2.383	1.794	2.020	0.966	120	560	15054	13359	0.916	9840	5214	8938	4421	0
4	18	7	"APT1"	"YML022W"	19680	16170	130	2850	2470	1145	64	278	1279	78	55	0	1762	1471	705	113	253	835	75	47	0	1.690	1.772	1.788	1.868	1.468	1.678	0.921	120	615	4435	3764	0.757	2786	1649	2406	1358	0
4	19	7	"HSC82"	"YMR186W"	19890	16180	130	1350	1270	565	64	74	47	100	97	0	817	787	345	112	119	36	93	90	0	1.824	1.787	1.801	1.867	1.508	1.765	0.953	120	606	1991	1881	0.867	1286	705	1206	675	0
4	20	7	"GUA1"	"YMR217W"	20090	16180	140	2775	2605	1333	68	114	625	89	74	0	1930	1782	960	119	174	845	73	53	0	1.495	1.526	1.535	1.702	1.629	1.486	0.943	156	613	4518	4200	0.580	2707	1811	2537	1663	0
4	21	7	"YMR250W"	"YMR250W"	20290	16180	120	1271	1294	726	71	140	742	75	23	0	894	935	511	122	192	923	38	3	0	1.554	1.504	1.507	1.587	1.414	1.169	0.872	120	574	1972	2036	0.636	1200	772	1223	813	0
4	1	8	"YMR188C"	"YMR188C"	16290	16370	140	1059	1043	579	55	63	33	98	97	0	1241	1219	697	104	110	35	96	94	0	0.883	0.886	0.892	1.010	1.646	0.864	0.963	156	770	2141	2103	-0.179	1004	1137	988	1115	0
4	2	8	"ESC1"	"YMR219W"	16490	16370	130	249	254	117	55	65	38	91	83	0	317	313	131	106	112	59	84	79	0	0.919	0.961	0.971	0.953	1.761	0.950	0.799	120	579	405	406	-0.121	194	211	199	207	0
4	3	8	"HOR7"	"YMR251W-A"	16690	16360	130	2779	2695	1495	56	64	37	100	99	0	1894	1727	951	105	110	56	94	90	0	1.522	1.627	1.620	1.767	1.487	1.612	0.967	120	625	4512	4261	0.606	2723	1789	2639	1622	0
4	4	8	"SGS1"	"YMR190C"	16910	16370	130	934	923	434	57	140	1244	19	0	0	1395	1369	692	108	201	1361	44	1	0	0.681	0.687	0.678	0.729	1.401	0.880	0.976	120	568	2164	2127	-0.553	877	1287	866	1261	0
4	5	8	"YMR221C"	"YMR221C"	17100	16370	150	686	886	695	58	138	1200	25	2	0	927	1181	903	111	199	1313	30	5	0	0.770	0.774	0.787	0.854	1.586	0.295	0.332	156	611	1444	1898	-0.378	628	816	828	1070	0
4	6	8	"YMR253C"	"YMR253C"	17300	16370	130	918	952	471	59	68	42	99	96	0	920	919	465	108	115	39	94	92	0	1.058	1.101	1.098	1.160	1.381	1.076	0.948	120	561	1671	1704	0.081	859	812	893	811	0
4	7	8	"YMR192W"	"YMR192W"	17490	16370	130	1201	1258	730	58	66	32	100	100	0	890	948	544	109	116	52	95	90	0	1.464	1.430	1.447	1.573	1.463	1.407	0.949	120	564	1924	2039	0.549	1143	781	1200	839	0
4	8	8	"UBP8"	"YMR223W"	17690	16380	130	2185	2133	1047	57	65	39	100	100	0	2670	2427	1278	113	120	57	95	95	0	0.832	0.897	0.905	1.032	1.668	0.874	0.965	120	591	4685	4390	-0.265	2128	2557	2076	2314	0
4	9	8	"GFD1"	"YMR255W"	17900	16370	130	2758	2620	1089	59	68	40	100	100	0	4009	3544	1546	109	114	33	99	99	0	0.692	0.746	0.739	0.820	1.513	0.732	0.957	120	596	6599	5996	-0.531	2699	3900	2561	3435	0
4	10	8	"LAP3"	"YNL239W"	18100	16370	130	5593	5122	2171	60	68	39	100	100	0	2180	1825	774	105	110	32	97	95	0	2.667	2.943	2.964	3.194	1.509	2.957	0.949	120	579	7608	6782	1.415	5533	2075	5062	1720	0
4	11	8	"BNI1"	"YNL271C"	18300	16370	130	1165	1270	675	58	69	52	97	96	0	910	954	473	101	110	56	90	87	0	1.368	1.421	1.412	1.549	1.648	1.419	0.928	120	615	1916	2065	0.452	1107	809	1212	853	0
4	12	8	"YNL303W"	"YNL303W"	18500	16370	130	978	934	489	57	65	39	98	93	0	561	511	257	101	105	28	87	85	0	2.002	2.139	2.106	2.197	1.368	2.073	0.938	120	558	1381	1287	1.002	921	460	877	410	0
4	13	8	"ZWF1"	"YNL241C"	18700	16370	130	3366	2924	1144	59	69	40	100	100	0	3192	2681	1135	105	110	32	99	98	0	1.071	1.112	1.110	1.203	1.398	1.083	0.969	120	576	6394	5441	0.099	3307	3087	2865	2576	0
4	14	8	"TOF1"	"YNL273W"	18900	16370	130	1455	1356	661	60	66	25	98	97	0	2110	1917	995	104	110	39	94	91	0	0.695	0.715	0.715	0.796	1.526	0.688	0.951	120	609	3401	3109	-0.524	1395	2006	1296	1813	0
4	15	8	"YNL305C"	"YNL305C"	19110	16370	130	3855	3321	1440	59	71	61	100	100	0	1510	1296	584	104	111	44	96	95	0	2.700	2.737	2.758	3.067	1.633	2.663	0.957	120	550	5202	4454	1.433	3796	1406	3262	1192	0
4	16	8	"SLA2"	"YNL243W"	19300	16370	130	7722	6596	2713	60	73	64	100	100	0	2413	2016	871	108	114	34	97	97	0	3.324	3.426	3.477	3.770	1.513	3.352	0.964	120	558	9967	8444	1.733	7662	2305	6536	1908	0
4	17	8	"YNL275W"	"YNL275W"	19500	16370	130	5721	4718	2179	61	68	30	100	100	0	4911	3992	1956	111	129	237	95	89	0	1.179	1.200	1.206	1.302	1.396	1.185	0.955	120	598	10460	8538	0.238	5660	4800	4657	3881	0
4	18	8	"MCK1"	"YNL307C"	19700	16370	130	5415	4642	2031	63	74	42	100	100	0	2452	2085	938	114	125	79	95	92	0	2.289	2.323	2.312	2.510	1.428	2.292	0.965	120	580	7690	6550	1.195	5352	2338	4579	1971	0
4	19	8	"YNL245C"	"YNL245C"	19890	16370	130	4949	4278	1896	64	74	38	100	100	0	2194	1906	872	116	122	46	96	94	0	2.351	2.354	2.385	2.566	1.490	2.303	0.966	120	543	6963	6004	1.233	4885	2078	4214	1790	0
4	20	8	"MET2"	"YNL277W"	20080	16370	140	6344	5407	2556	67	105	584	96	89	0	3221	2657	1258	116	155	771	83	76	0	2.022	2.102	2.081	2.237	1.436	2.108	0.971	156	590	9382	7881	1.015	6277	3105	5340	2541	0
4	21	8	"STB1"	"YNL309W"	20290	16380	150	8181	6931	2781	71	228	1077	95	90	0	6984	5812	2364	120	233	921	93	88	0	1.182	1.205	1.207	1.242	1.260	1.231	0.950	156	803	14974	12552	0.241	8110	6864	6860	5692	0
4	1	9	"YOR041C"	"YOR041C"	16290	16560	130	3060	2813	1305	56	64	31	100	100	0	1603	1479	684	107	113	49	98	95	0	2.008	2.009	2.024	2.114	1.455	1.975	0.935	120	657	4500	4129	1.006	3004	1496	2757	1372	0
4	2	9	"YOR073W"	"YOR073W"	16490	16560	130	5651	4935	2227	56	66	48	100	99	0	6105	5302	2466	112	119	63	99	96	0	0.934	0.940	0.943	0.989	1.498	0.923	0.958	120	578	11588	10069	-0.099	5595	5993	4879	5190	0
4	3	9	"YOR105W"	"YOR105W"	16690	16570	140	5682	4837	2187	57	70	67	100	99	0	1610	1371	604	110	133	339	85	80	0	3.750	3.791	3.713	4.018	1.605	3.781	0.735	156	626	7125	6041	1.907	5625	1500	4780	1261	0
4	4	9	"WHI2"	"YOR043W"	16890	16570	140	5307	5006	2634	58	66	52	100	99	0	4074	3683	1952	108	145	450	89	85	0	1.323	1.384	1.372	1.534	1.714	1.378	0.933	156	604	9215	8523	0.404	5249	3966	4948	3575	0
4	5	9	"UFE1"	"YOR075W"	17100	16570	140	5339	4617	2256	58	66	39	100	100	0	7604	6439	3298	109	131	305	93	90	0	0.705	0.720	0.710	0.778	1.521	0.702	0.951	156	573	12776	10889	-0.505	5281	7495	4559	6330	0
4	6	9	"YOR107W"	"YOR107W"	17290	16570	140	2969	2670	1330	58	67	39	100	98	0	1555	1430	703	106	169	1384	55	1	0	2.009	1.973	1.969	2.089	1.474	0.720	0.172	156	586	4360	3936	1.006	2911	1449	2612	1324	0
4	7	9	"TOM6"	"YOR045W"	17490	16570	140	891	831	376	57	63	25	100	96	0	1232	1104	507	102	161	1363	30	0	0	0.738	0.772	0.783	0.834	1.556	0.756	0.937	156	604	1964	1776	-0.438	834	1130	774	1002	0
4	8	9	"RTS2"	"YOR077W"	17690	16570	140	2227	2011	1026	58	68	38	98	97	0	1000	867	419	105	109	33	92	90	0	2.423	2.563	2.604	2.733	1.532	2.584	0.935	156	590	3064	2715	1.277	2169	895	1953	762	0
4	9	9	"INP53"	"YOR109W"	17890	16570	140	3343	3229	1655	60	71	43	99	98	0	1997	1838	934	106	111	34	94	93	0	1.736	1.830	1.829	2.046	1.743	1.838	0.948	156	590	5174	4901	0.796	3283	1891	3169	1732	0
4	10	9	"STD1"	"YOR047C"	18090	16570	140	6044	5345	2484	60	73	57	100	99	0	6656	5689	2784	104	109	35	100	98	0	0.913	0.946	0.948	1.024	1.461	0.930	0.960	156	606	12536	10870	-0.131	5984	6552	5285	5585	0
4	11	9	"ATX2"	"YOR079C"	18290	16570	130	3348	3338	1757	59	72	60	99	98	0	3120	2973	1589	104	109	38	97	95	0	1.091	1.143	1.173	1.249	1.478	1.136	0.952	120	602	6305	6148	0.125	3289	3016	3279	2869	0
4	12	9	"YOR111W"	"YOR111W"	18490	16570	140	2290	2037	1047	57	66	38	100	100	0	1664	1496	802	102	106	29	93	92	0	1.430	1.420	1.423	1.572	1.681	1.393	0.948	156	636	3795	3374	0.516	2233	1562	1980	1394	0
4	13	9	"YPL030W"	"YPL030W"	18690	16570	140	2694	2578	1315	57	66	35	100	97	0	1579	1483	788	103	107	29	92	91	0	1.787	1.827	1.790	1.970	1.502	1.803	0.942	156	622	4113	3901	0.837	2637	1476	2521	1380	0
4	14	9	"YPL062W"	"YPL062W"	18890	16570	130	1153	1095	510	58	64	25	99	95	0	532	508	259	103	108	27	92	90	0	2.552	2.560	2.656	2.618	1.396	2.436	0.663	120	577	1524	1442	1.352	1095	429	1037	405	0
4	15	9	"SEC62"	"YPL094C"	19090	16570	140	3461	2950	1445	57	67	54	100	100	0	1652	1395	698	104	109	32	96	94	0	2.199	2.241	2.247	2.501	1.583	2.210	0.963	156	664	4952	4184	1.137	3404	1548	2893	1291	0
4	16	9	"SVL3"	"YPL032C"	19290	16570	130	4012	3831	2222	59	68	32	100	100	0	3385	3273	1929	109	121	227	90	82	0	1.207	1.192	1.186	1.330	1.617	1.183	0.956	120	610	7229	6936	0.271	3953	3276	3772	3164	0
4	17	9	"YPL064C"	"YPL064C"	19500	16570	130	2538	2231	1091	60	68	28	100	98	0	1845	1629	784	112	208	1991	30	0	0	1.430	1.431	1.417	1.515	1.589	1.384	0.856	120	626	4211	3688	0.516	2478	1733	2171	1517	0
4	18	9	"YPL096W"	"YPL096W"	19700	16570	140	7252	5937	3107	62	71	37	100	100	0	6289	5129	2823	118	201	1917	78	67	0	1.165	1.172	1.187	1.304	1.508	0.895	0.599	156	667	13361	10886	0.220	7190	6171	5875	5011	0
4	19	9	"YPL034W"	"YPL034W"	19900	16580	150	3391	2882	1301	66	82	63	100	100	0	3900	3288	1509	124	137	71	98	96	0	0.881	0.890	0.891	0.946	1.426	0.877	0.963	156	686	7101	5980	-0.184	3325	3776	2816	3164	0
4	20	9	"YPL066W"	"YPL066W"	20100	16570	130	8506	7247	3216	68	85	68	100	100	0	5211	4459	2088	123	136	70	100	97	0	1.658	1.656	1.644	1.783	1.343	1.628	0.968	120	571	13526	11515	0.730	8438	5088	7179	4336	0
4	21	9	"YPL098C"	"YPL098C"	20300	16580	150	3521	3188	1442	70	218	956	88	76	0	2063	1885	845	117	213	651	85	71	0	1.773	1.764	1.734	1.849	1.427	1.672	0.933	156	822	5397	4886	0.827	3451	1946	3118	1768	0
4	1	10	"PMA2"	"YPL036W"	16300	16770	140	2097	2056	1150	55	61	27	100	99	0	1787	1677	921	104	111	72	94	89	0	1.213	1.272	1.275	1.367	1.443	1.266	0.965	156	809	3725	3574	0.279	2042	1683	2001	1573	0
4	2	10	"YPL068C"	"YPL068C"	16510	16770	150	3721	3082	1478	53	62	42	100	100	0	3351	2784	1367	105	111	73	98	94	0	1.130	1.131	1.143	1.241	1.493	1.123	0.965	156	667	6914	5708	0.176	3668	3246	3029	2679	0
4	3	10	"YPL100W"	"YPL100W"	16710	16770	150	1077	1186	700	56	68	66	96	94	0	1214	1247	702	103	128	356	84	71	0	0.919	0.988	0.978	1.032	1.386	0.859	0.775	156	559	2132	2274	-0.122	1021	1111	1130	1144	0
4	4	10	"NAT3"	"YPR131C"	16900	16770	140	1522	1495	815	56	67	57	99	94	0	1299	1258	694	106	148	475	80	64	0	1.229	1.249	1.253	1.352	1.473	1.228	0.951	156	541	2659	2591	0.297	1466	1193	1439	1152	0
4	5	10	"TIF3"	"YPR163C"	17100	16770	140	4061	4338	2620	58	65	31	100	100	0	1551	1558	865	107	130	297	86	80	0	2.772	2.950	2.952	3.026	1.467	3.022	0.961	156	601	5447	5731	1.471	4003	1444	4280	1451	0
4	6	10	"YPR195C"	"YPR195C"	17310	16770	130	342	333	174	59	66	27	96	88	0	356	355	178	106	171	1400	0	0	0	1.132	1.100	1.037	1.201	1.776	0.007	0.004	120	573	533	523	0.179	283	250	274	249	0
4	7	10	"YPR133C"	"YPR133C"	17500	16770	130	731	701	281	59	76	72	97	93	0	578	572	229	103	117	70	92	90	0	1.415	1.369	1.406	1.462	1.535	1.348	0.906	120	542	1147	1111	0.501	672	475	642	469	0
4	8	10	"RHO1"	"YPR165W"	17700	16770	140	3513	3166	1328	59	76	72	100	100	0	2549	2193	991	101	114	62	96	92	0	1.411	1.485	1.469	1.633	1.444	1.457	0.965	156	611	5902	5199	0.497	3454	2448	3107	2092	0
4	9	10	"YPR197C"	"YPR197C"	17910	16770	140	3081	2812	1417	57	68	42	99	98	0	2237	1958	1013	98	105	34	95	92	0	1.414	1.481	1.481	1.681	1.681	1.464	0.967	156	591	5163	4615	0.500	3024	2139	2755	1860	0
4	10	10	"CTF4"	"YPR135W"	18100	16770	140	318	431	333	57	68	55	92	83	0	310	406	298	98	105	43	85	78	0	1.231	1.214	1.282	1.364	1.798	1.172	0.897	156	658	473	682	0.300	261	212	374	308	0
4	11	10	"MET16"	"YPR167C"	18320	16770	110	256	427	391	58	69	58	88	73	0	267	409	348	102	107	46	81	72	0	1.200	1.202	1.208	1.246	1.609	1.148	0.868	80	469	363	676	0.263	198	165	369	307	0
4	12	10	"ARR1"	"YPR199C"	18500	16780	140	107	110	38	58	68	42	57	17	0	224	211	70	104	107	33	82	77	0	0.408	0.486	0.447	0.468	2.162	0.617	0.424	156	595	169	159	-1.292	49	120	52	107	0
4	13	10	"RRP9"	"YPR137W"	18700	16770	140	288	328	216	58	69	46	91	85	0	319	349	194	104	108	33	89	85	0	1.070	1.102	1.039	1.113	1.774	1.121	0.809	156	620	445	515	0.097	230	215	270	245	0
4	14	10	"YPR169W"	"YPR169W"	18910	16780	140	6779	5761	2646	58	67	37	100	100	0	4668	4093	1969	101	106	26	98	97	0	1.472	1.429	1.433	1.619	1.675	1.416	0.968	156	684	11288	9695	0.557	6721	4567	5703	3992	0
4	15	10	"ARR3"	"YPR201W"	19120	16770	130	270	263	97	57	64	29	95	88	0	339	311	111	103	108	34	86	85	0	0.903	0.990	0.952	0.976	1.544	0.936	0.828	120	576	449	414	-0.148	213	236	206	208	0
4	16	10	"CEN1"	"CEN1"	19310	16770	130	270	264	109	57	64	28	95	86	0	767	700	300	105	110	35	91	90	0	0.322	0.348	0.339	0.343	1.494	0.327	0.844	120	599	875	802	-1.636	213	662	207	595	0
4	17	10	"YBL091C-A"	"YBL091C-A"	19500	16780	130	1058	1007	537	58	64	26	97	92	0	1219	1115	601	108	114	36	88	87	0	0.900	0.942	0.928	1.019	1.664	0.922	0.963	120	611	2111	1956	-0.152	1000	1111	949	1007	0
4	18	10	"YBLWdelta8"	"YBLWdelta8"	19710	16780	130	484	476	207	59	66	30	96	95	0	629	581	225	109	203	2008	0	0	0	0.817	0.883	0.833	0.882	1.439	0.007	0.006	120	609	945	889	-0.291	425	520	417	472	0
4	19	10	"YCRCtau1"	"YCRCtau1"	19900	16780	120	159	184	107	62	73	52	75	45	0	253	254	108	119	133	113	56	17	0	0.724	0.904	0.806	0.748	2.347	0.875	0.743	120	508	231	257	-0.466	97	134	122	135	0
4	20	10	"SNR189"	"SNR189"	20110	16780	130	565	539	203	64	80	69	97	94	0	334	326	116	123	289	2756	0	0	0	2.374	2.340	2.197	2.419	1.491	0.006	0.006	120	627	712	678	1.248	501	211	475	203	0
4	21	10	"YCRWomega3"	"YCRWomega3"	20310	16770	130	1879	1726	817	63	75	48	97	95	0	2586	2315	1140	115	154	835	81	74	0	0.735	0.756	0.756	0.833	1.532	0.733	0.976	120	665	4287	3863	-0.444	1816	2471	1663	2200	0
4	1	11	"IntYDR064W"	"IntYDR064W"	16310	16970	130	846	806	407	53	59	25	100	98	0	905	870	431	102	111	89	91	88	0	0.988	0.980	0.943	1.039	1.660	0.965	0.884	120	658	1596	1521	-0.018	793	803	753	768	0
4	2	11	"YDRWsigma4"	"YDRWsigma4"	16510	16970	130	176	181	76	52	58	23	93	85	0	274	259	105	97	102	26	86	80	0	0.701	0.796	0.744	0.801	1.796	0.700	0.668	120	577	301	291	-0.513	124	177	129	162	0
4	3	11	"tG(CCC)D"	"tG(CCC)D"	16710	16970	140	160	163	65	54	59	21	93	85	0	238	228	89	96	101	24	85	82	0	0.746	0.826	0.764	0.781	1.872	0.759	0.625	156	573	248	241	-0.422	106	142	109	132	0
4	4	11	"YERWdelta12"	"YERWdelta12"	16900	16970	140	776	709	321	55	61	26	99	98	0	743	672	310	100	105	25	94	89	0	1.121	1.143	1.163	1.309	1.920	1.117	0.901	156	554	1364	1226	0.165	721	643	654	572	0
4	5	11	"IntYER133W"	"IntYER133W"	17110	16970	140	2252	2034	1004	57	62	26	100	99	0	993	904	427	105	111	30	95	94	0	2.472	2.474	2.462	2.609	1.706	2.497	0.941	156	603	3083	2776	1.306	2195	888	1977	799	0
4	6	11	"YERCdelta26"	"YERCdelta26"	17310	16970	130	1611	1556	698	57	62	24	100	99	0	1685	1590	717	105	111	33	96	95	0	0.984	1.009	1.024	1.090	1.591	0.974	0.918	120	574	3134	2984	-0.024	1554	1580	1499	1485	0
4	7	11	"iYAR044W-2"	"iYAR044W-2"	17510	16970	140	465	451	215	57	72	69	91	84	0	573	530	248	104	117	67	87	83	0	0.870	0.925	0.900	0.934	1.788	0.887	0.847	156	607	877	820	-0.201	408	469	394	426	0
4	8	11	"iYAR050W"	"iYAR050W"	17710	16980	140	928	960	542	55	63	43	96	93	0	1156	1142	578	101	116	216	87	83	0	0.827	0.869	0.866	0.913	1.797	0.883	0.920	156	586	1928	1946	-0.273	873	1055	905	1041	0
4	9	11	"iYARCdelta8-2"	"iYARCdelta8-2"	17900	16970	130	191	215	107	56	63	32	91	86	0	289	294	129	97	112	217	42	3	0	0.703	0.807	0.733	0.794	2.051	0.135	0.108	120	570	327	356	-0.508	135	192	159	197	0
4	10	11	"iYBLWdelta3"	"iYBLWdelta3"	18120	16970	130	307	315	156	56	63	31	94	90	0	406	395	186	95	99	27	89	88	0	0.807	0.863	0.804	0.914	2.101	0.825	0.787	120	589	562	559	-0.309	251	311	259	300	0
4	11	11	"iYBL105C"	"iYBL105C"	18310	16970	140	4224	4222	2442	58	67	43	100	100	0	2383	2204	1197	99	104	30	98	96	0	1.824	1.978	1.925	2.030	1.650	2.034	0.927	156	624	6450	6269	0.867	4166	2284	4164	2105	0
4	12	11	"iYBL101C"	"iYBL101C"	18500	16970	130	6208	5580	2677	59	76	82	100	100	0	1586	1370	695	102	110	55	89	87	0	4.144	4.354	4.213	4.942	1.795	4.387	0.923	120	522	7633	6789	2.051	6149	1484	5521	1268	0
4	13	11	"iYBL085W"	"iYBL085W"	18700	16970	130	2271	2285	1113	58	76	79	100	99	0	3535	3264	1602	104	114	61	98	95	0	0.645	0.705	0.691	0.797	1.777	0.682	0.925	120	611	5644	5387	-0.633	2213	3431	2227	3160	0
4	14	11	"iYBL080C"	"iYBL080C"	18910	16980	130	2461	2974	2001	58	67	35	100	100	0	928	1044	577	105	111	43	98	94	0	2.920	3.105	2.949	3.035	1.595	3.404	0.875	120	554	3226	3855	1.546	2403	823	2916	939	0
4	15	11	"iYBL075C"	"iYBL075C"	19110	16980	140	4643	3979	2075	57	65	31	100	100	0	2456	2038	1089	103	108	35	96	94	0	1.949	2.027	2.013	2.220	1.872	2.029	0.935	156	656	6939	5857	0.963	4586	2353	3922	1935	0
4	16	11	"iYBL056W"	"iYBL056W"	19320	16980	130	1235	1218	584	57	68	50	99	96	0	1556	1431	704	106	114	63	95	93	0	0.812	0.876	0.883	0.946	1.693	0.856	0.915	120	566	2628	2486	-0.300	1178	1450	1161	1325	0
4	17	11	"iYBL051C"	"iYBL051C"	19510	16980	140	2566	2292	1244	57	66	42	100	99	0	1067	920	480	108	116	59	89	87	0	2.616	2.752	2.697	2.987	1.823	2.797	0.913	156	666	3468	3047	1.388	2509	959	2235	812	0
4	18	11	"iYBL046W"	"iYBL046W"	19730	16980	130	1223	1129	539	58	67	40	100	95	0	1046	932	427	99	116	116	90	85	0	1.230	1.286	1.328	1.350	1.781	1.262	0.877	120	521	2112	1904	0.299	1165	947	1071	833	0
4	19	11	"iYBR250W"	"iYBR250W"	19900	16970	140	1363	1287	701	60	70	36	99	98	0	986	965	522	109	120	97	89	83	0	1.486	1.433	1.418	1.591	1.820	1.408	0.918	156	586	2180	2083	0.571	1303	877	1227	856	0
4	20	11	"iYBR254C"	"iYBR254C"	20110	16980	140	1098	1054	517	61	74	55	98	96	0	786	731	356	116	265	2664	0	0	0	1.548	1.615	1.539	1.645	1.676	0.020	0.012	156	671	1707	1608	0.630	1037	670	993	615	0
4	21	11	"iYBR259W"	"iYBR259W"	20320	16980	130	483	476	206	61	76	61	97	89	0	976	937	396	113	127	169	89	86	0	0.489	0.504	0.486	0.541	1.869	0.477	0.819	120	683	1285	1239	-1.032	422	863	415	824	0
4	1	12	"iYBR279W"	"iYBR279W"	16310	17170	140	941	914	395	54	59	22	100	100	0	2107	1972	946	103	110	58	100	98	0	0.443	0.460	0.452	0.500	1.475	0.442	0.953	156	771	2891	2729	-1.176	887	2004	860	1869	0
4	2	12	"iYBR283C"	"iYBR283C"	16520	17170	130	2234	2125	805	53	58	22	100	100	0	842	789	289	99	103	25	97	96	0	2.935	3.003	3.020	3.083	1.239	3.005	0.957	120	578	2924	2762	1.554	2181	743	2072	690	0
4	3	12	"iYBR287W"	"iYBR287W"	16710	17170	130	393	376	128	54	59	22	100	100	0	706	649	263	97	101	29	95	91	0	0.557	0.583	0.573	0.662	1.729	0.541	0.902	120	561	948	874	-0.845	339	609	322	552	0
4	4	12	"iYCL075W"	"iYCL075W"	16910	17170	140	1054	984	386	56	61	25	100	100	0	990	893	376	100	105	38	98	95	0	1.121	1.170	1.160	1.287	1.650	1.136	0.941	156	578	1888	1721	0.165	998	890	928	793	0
4	5	12	"iYCL073C"	"iYCL073C"	17110	17170	140	5516	5001	1976	57	61	24	100	100	0	4680	4095	1735	104	109	26	100	100	0	1.193	1.239	1.225	1.306	1.293	1.220	0.975	156	566	10035	8935	0.255	5459	4576	4944	3991	0
4	6	12	"iYCL065W-0"	"iYCL065W-0"	17290	17170	130	1365	1256	540	56	61	22	100	100	0	1772	1567	712	104	109	28	98	96	0	0.785	0.820	0.829	0.904	1.519	0.797	0.960	120	539	2977	2663	-0.350	1309	1668	1200	1463	0
4	7	12	"iYCL047C"	"iYCL047C"	17490	17170	140	718	669	271	54	60	23	100	99	0	1658	1416	694	103	106	26	96	96	0	0.427	0.468	0.464	0.526	1.729	0.438	0.942	156	634	2219	1928	-1.228	664	1555	615	1313	0
4	8	12	"iYCL038C"	"iYCL038C"	17690	17170	130	743	719	251	53	57	21	100	100	0	1263	1174	463	100	117	275	90	83	0	0.593	0.620	0.611	0.702	1.635	0.490	0.728	120	520	1853	1740	-0.753	690	1163	666	1074	0
4	9	12	"iYCL033C"	"iYCL033C"	17890	17170	140	1521	1410	707	54	58	20	100	100	0	2542	2251	1183	97	121	322	89	82	0	0.600	0.630	0.613	0.693	1.434	0.568	0.858	156	634	3912	3510	-0.737	1467	2445	1356	2154	0
4	10	12	"iYDL054C"	"iYDL054C"	18090	17170	130	2625	2297	1120	56	61	26	100	100	0	1532	1344	614	95	99	25	93	91	0	1.788	1.794	1.765	1.973	1.710	1.851	0.958	120	598	4006	3490	0.838	2569	1437	2241	1249	0
4	11	12	"iYDL049C"	"iYDL049C"	18290	17170	130	3393	2943	1313	57	65	41	100	100	0	1109	983	436	99	105	81	90	89	0	3.303	3.265	3.253	3.492	1.428	3.151	0.929	120	575	4346	3770	1.724	3336	1010	2886	884	0
4	12	12	"iYDL046W"	"iYDL046W"	18490	17170	140	3041	2653	1215	58	73	75	100	96	0	2898	2468	1183	100	107	48	96	94	0	1.066	1.096	1.098	1.249	1.737	1.072	0.973	156	651	5781	4963	0.092	2983	2798	2595	2368	0
4	13	12	"iYDL028C"	"iYDL028C"	18690	17170	130	2495	2311	1152	57	67	44	99	95	0	1538	1404	635	102	110	45	93	91	0	1.698	1.731	1.721	1.764	1.356	1.811	0.934	120	577	3874	3556	0.764	2438	1436	2254	1302	0
4	14	12	"itA(AGC)D"	"itA(AGC)D"	18890	17170	140	2588	2330	1083	58	66	36	100	99	0	1021	939	437	107	119	105	90	85	0	2.768	2.731	2.679	3.072	1.693	2.693	0.886	156	616	3444	3104	1.469	2530	914	2272	832	0
4	15	12	"iYDL019C"	"iYDL019C"	19090	17180	140	3869	3609	1431	59	66	33	100	100	0	1691	1518	602	107	117	105	95	92	0	2.405	2.516	2.499	2.642	1.426	2.495	0.976	156	564	5394	4961	1.266	3810	1584	3550	1411	0
4	16	12	"iYDL005C"	"iYDL005C"	19290	17180	140	4873	4173	1888	59	178	1734	84	70	0	3847	3271	1477	107	250	2675	70	0	0	1.287	1.300	1.300	1.402	1.403	1.293	0.977	156	610	8554	7278	0.364	4814	3740	4114	3164	0
4	17	12	"iYDL001W"	"iYDL001W"	19490	17170	130	1516	1327	528	61	194	1829	6	0	0	5780	5016	2258	114	276	2822	79	50	0	0.257	0.258	0.251	0.293	1.569	0.251	0.954	120	548	7121	6168	-1.961	1455	5666	1266	4902	0
4	18	12	"iYDR003W"	"iYDR003W"	19700	17180	140	1252	1194	540	59	68	40	98	97	0	2206	2006	935	99	112	71	96	92	0	0.566	0.595	0.600	0.643	1.529	0.584	0.971	156	619	3300	3042	-0.821	1193	2107	1135	1907	0
4	19	12	"iYDR020C"	"iYDR020C"	19890	17180	140	1923	1740	743	59	68	36	100	100	0	1190	1086	477	107	115	48	97	92	0	1.721	1.717	1.725	1.928	1.637	1.673	0.957	156	583	2947	2660	0.783	1864	1083	1681	979	0
4	20	12	"iYDR023W"	"iYDR023W"	20100	17180	140	610	669	342	59	68	35	99	98	0	825	816	392	113	118	32	96	93	0	0.774	0.868	0.843	0.920	1.550	0.863	0.936	156	634	1263	1313	-0.370	551	712	610	703	0
4	21	12	"iYDR028C"	"iYDR028C"	20310	17180	120	1045	1179	620	59	70	35	100	100	0	768	888	474	113	119	51	97	97	0	1.505	1.445	1.435	1.547	1.421	1.394	0.949	120	597	1641	1895	0.590	986	655	1120	775	0
4	1	13	"iYDR322W"	"iYDR322W"	16300	17370	140	1602	1504	813	54	58	22	99	98	0	1331	1211	651	102	105	24	94	92	0	1.260	1.307	1.332	1.420	1.557	1.291	0.975	156	729	2777	2559	0.333	1548	1229	1450	1109	0
4	2	13	"iYDR326C"	"iYDR326C"	16500	17370	140	746	689	313	55	59	21	98	96	0	363	343	125	99	104	25	93	89	0	2.617	2.598	2.600	2.604	1.385	2.660	0.911	156	609	955	878	1.388	691	264	634	244	0
4	3	13	"iYDR331W"	"iYDR331W"	16700	17370	130	302	307	123	55	61	30	98	92	0	325	317	119	99	105	46	88	84	0	1.093	1.156	1.199	1.200	1.561	1.080	0.801	120	559	473	470	0.128	247	226	252	218	0
4	4	13	"iYDR345C-0"	"iYDR345C-0"	16900	17370	140	4138	3546	1717	56	62	30	100	100	0	2239	1928	897	102	108	46	96	94	0	1.910	1.911	1.887	1.964	1.332	1.937	0.968	156	583	6219	5316	0.934	4082	2137	3490	1826	0
4	5	13	"iYDR348C"	"iYDR348C"	17100	17370	140	3224	2764	1290	56	61	24	100	100	0	1507	1289	583	104	108	25	98	95	0	2.258	2.285	2.285	2.421	1.368	2.288	0.978	156	573	4571	3893	1.175	3168	1403	2708	1185	0
4	6	13	"iYDR350C"	"iYDR350C"	17300	17370	130	2892	2574	1072	56	62	24	100	100	0	1041	942	381	104	108	25	95	93	0	3.027	3.005	3.007	3.138	1.270	2.964	0.973	120	612	3773	3356	1.598	2836	937	2518	838	0
4	7	13	"iYDR367W"	"iYDR367W"	17510	17370	120	873	824	426	55	63	42	99	95	0	663	606	295	102	108	39	94	90	0	1.458	1.526	1.576	1.600	1.428	1.512	0.943	120	525	1379	1273	0.544	818	561	769	504	0
4	8	13	"iYDR371W"	"iYDR371W"	17700	17370	140	450	436	199	54	60	38	97	92	0	714	662	321	101	118	251	78	60	0	0.646	0.681	0.654	0.728	1.599	1.199	0.932	156	634	1009	943	-0.630	396	613	382	561	0
4	9	13	"iYDR375C"	"iYDR375C"	17910	17370	130	1308	1182	495	53	57	21	100	100	0	566	517	207	97	100	24	90	89	0	2.676	2.688	2.640	2.850	1.560	2.650	0.949	120	559	1724	1549	1.420	1255	469	1129	420	0
4	10	13	"itG(CCC)D"	"itG(CCC)D"	18100	17370	130	1395	1290	548	53	59	28	100	100	0	735	662	266	96	102	79	90	86	0	2.100	2.186	2.232	2.364	1.421	2.159	0.886	120	582	1981	1803	1.070	1342	639	1237	566	0
4	11	13	"iYDR394W"	"iYDR394W"	18300	17370	130	1575	1528	716	54	60	25	100	100	0	948	891	412	96	102	78	90	87	0	1.785	1.854	1.855	2.061	1.577	1.829	0.926	120	595	2373	2269	0.836	1521	852	1474	795	0
4	12	13	"iYDR399W"	"iYDR399W"	18500	17370	130	969	880	371	55	61	26	100	99	0	702	656	284	98	102	24	94	91	0	1.513	1.478	1.484	1.635	1.548	1.425	0.952	120	575	1518	1383	0.598	914	604	825	558	0
4	13	13	"iYER056C-A"	"iYER056C-A"	18710	17380	140	2766	2400	1010	57	65	33	100	100	0	1695	1479	632	103	108	27	98	97	0	1.702	1.703	1.681	1.820	1.430	1.690	0.972	156	604	4301	3719	0.767	2709	1592	2343	1376	0
4	14	13	"iYER060W"	"iYER060W"	18910	17380	140	5459	4668	2110	59	66	35	100	100	0	3924	3333	1481	108	118	106	96	93	0	1.415	1.429	1.417	1.529	1.433	1.439	0.963	156	545	9216	7834	0.501	5400	3816	4609	3225	0
4	15	13	"iYER063W"	"iYER063W"	19100	17370	130	7042	6080	2821	59	71	65	100	100	0	4335	3703	1801	107	118	108	95	91	0	1.652	1.674	1.692	1.858	1.368	1.637	0.979	120	566	11211	9617	0.724	6983	4228	6021	3596	0
4	16	13	"itA(UGC)E"	"itA(UGC)E"	19320	17370	130	1032	989	432	61	193	1815	0	0	0	880	837	351	108	263	2799	0	0	0	1.258	1.273	1.279	1.355	1.397	0.644	0.894	120	557	1743	1657	0.331	971	772	928	729	0
4	17	13	"iYER078C"	"iYER078C"	19500	17370	130	2914	2565	1154	64	187	1751	76	13	0	1453	1276	562	107	251	2701	0	0	0	2.117	2.139	2.152	2.370	1.597	0.733	0.772	120	598	4196	3670	1.082	2850	1346	2501	1169	0
4	18	13	"iYER082C"	"iYER082C"	19710	17370	130	1415	1342	649	59	68	35	100	99	0	1039	1004	536	93	100	41	99	98	0	1.433	1.408	1.412	1.439	1.247	1.348	0.945	120	582	2302	2194	0.519	1356	946	1283	911	0
4	19	13	"iYER096W"	"iYER096W"	19910	17380	130	777	784	340	59	69	37	99	98	0	636	677	282	108	115	43	96	96	0	1.360	1.274	1.279	1.303	1.259	1.264	0.941	120	565	1246	1294	0.443	718	528	725	569	0
4	20	13	"iYER098W"	"iYER098W"	20100	17370	130	2842	2439	981	62	74	49	100	100	0	2810	2412	983	113	121	40	100	98	0	1.031	1.034	1.040	1.086	1.244	1.024	0.983	120	544	5477	4676	0.044	2780	2697	2377	2299	0
4	21	13	"iYER102W"	"iYER102W"	20300	17380	140	7297	6400	2487	61	72	59	100	100	0	3266	2818	1122	111	123	95	98	96	0	2.294	2.342	2.334	2.450	1.219	2.343	0.979	156	751	10391	9046	1.198	7236	3155	6339	2707	0
4	1	14	"iYER118C"	"iYER118C"	16310	17570	140	2616	2364	1034	55	61	53	100	100	0	1732	1546	647	103	108	45	99	98	0	1.572	1.600	1.627	1.645	1.309	1.606	0.970	156	716	4190	3752	0.653	2561	1629	2309	1443	0
4	2	14	"iYER123W"	"iYER123W"	16510	17560	130	4830	4750	2144	55	61	26	100	100	0	3876	3567	1559	103	110	57	100	100	0	1.266	1.355	1.361	1.385	1.233	1.361	0.975	120	556	8548	8159	0.340	4775	3773	4695	3464	0
4	3	14	"iYER127W"	"iYER127W"	16710	17570	140	2075	2007	1066	56	62	31	98	96	0	1657	1513	743	106	114	62	92	89	0	1.302	1.387	1.393	1.501	1.637	1.405	0.966	156	606	3570	3358	0.380	2019	1551	1951	1407	0
4	4	14	"iYGL200C"	"iYGL200C"	16910	17570	140	1652	1468	595	55	60	28	100	100	0	512	477	167	104	110	41	94	92	0	3.914	3.788	3.755	3.947	1.441	3.899	0.888	156	556	2005	1786	1.969	1597	408	1413	373	0
4	5	14	"iYGL195W"	"iYGL195W"	17110	17570	140	1273	1161	473	54	60	25	100	100	0	2866	2621	1267	104	108	27	100	98	0	0.441	0.440	0.443	0.484	1.479	0.413	0.949	156	583	3981	3624	-1.180	1219	2762	1107	2517	0
4	6	14	"iYGL190C"	"iYGL190C"	17310	17570	130	3096	2804	1314	54	60	26	100	100	0	1276	1199	566	104	108	26	99	99	0	2.596	2.511	2.513	2.662	1.342	2.477	0.952	120	561	4214	3845	1.376	3042	1172	2750	1095	0
4	7	14	"iYGL176C"	"iYGL176C"	17500	17570	130	2532	2537	1155	56	62	27	100	100	0	1928	1775	787	103	106	25	100	99	0	1.357	1.484	1.474	1.574	1.352	1.476	0.965	120	577	4301	4153	0.440	2476	1825	2481	1672	0
4	8	14	"iYGL172W"	"iYGL172W"	17710	17570	140	1961	2024	1137	55	60	25	100	100	0	1410	1436	768	100	104	26	100	99	0	1.455	1.474	1.490	1.522	1.353	1.484	0.964	156	606	3216	3305	0.541	1906	1310	1969	1336	0
4	9	14	"iYGL169W"	"iYGL169W"	17910	17570	140	335	331	147	53	58	25	98	95	0	636	599	278	97	101	26	96	94	0	0.523	0.554	0.536	0.587	1.750	0.524	0.879	156	607	821	780	-0.935	282	539	278	502	0
4	10	14	"iYGL152C"	"iYGL152C"	18110	17560	130	706	647	266	52	58	30	100	100	0	518	477	187	96	99	24	95	92	0	1.550	1.562	1.564	1.645	1.594	1.528	0.922	120	577	1076	976	0.632	654	422	595	381	0
4	11	14	"iYGL147C"	"iYGL147C"	18310	17570	140	2042	2072	1106	54	60	28	100	100	0	1015	1012	470	97	100	25	98	98	0	2.166	2.205	2.205	2.201	1.336	2.268	0.964	156	627	2906	2933	1.115	1988	918	2018	915	0
4	12	14	"iYGL143C"	"iYGL143C"	18510	17570	140	1587	1672	962	55	61	27	100	100	0	938	897	436	98	101	25	97	96	0	1.824	2.024	2.017	2.097	1.540	2.103	0.957	156	609	2372	2416	0.867	1532	840	1617	799	0
4	13	14	"iYGL125W"	"iYGL125W"	18710	17570	140	548	596	319	56	62	28	99	97	0	1078	1065	591	102	106	25	96	95	0	0.504	0.561	0.546	0.607	1.636	0.541	0.930	156	568	1468	1503	-0.988	492	976	540	963	0
4	14	14	"iYGL121C"	"iYGL121C"	18910	17570	140	1249	1153	509	58	64	29	100	100	0	507	491	196	105	108	28	92	92	0	2.963	2.837	2.847	2.965	1.463	2.829	0.934	156	543	1593	1481	1.567	1191	402	1095	386	0
4	15	14	"iYGL118C"	"iYGL118C"	19100	17570	130	467	477	204	58	68	62	95	91	0	337	322	124	104	108	39	88	83	0	1.755	1.922	1.827	2.054	1.741	1.858	0.888	120	552	642	637	0.812	409	233	419	218	0
4	16	14	"iYGR165W"	"iYGR165W"	19310	17570	140	1391	1292	614	62	74	57	99	97	0	981	896	417	107	116	83	94	87	0	1.521	1.559	1.549	1.682	1.484	1.530	0.926	156	674	2203	2019	0.605	1329	874	1230	789	0
4	17	14	"iYGR169C"	"iYGR169C"	19510	17570	130	6955	6870	5362	64	79	59	100	100	0	3784	4362	7136	99	111	95	95	93	0	1.870	1.597	1.852	1.975	1.536	0.965	0.735	120	596	10576	11069	0.903	6891	3685	6806	4263	0
4	18	14	"iYGR173W"	"iYGR173W"	19710	17570	130	1506	1370	675	60	71	50	100	97	0	1744	1554	733	87	96	47	97	97	0	0.873	0.893	0.886	0.905	1.333	0.882	0.953	120	613	3103	2777	-0.197	1446	1657	1310	1467	0
4	19	14	"iYGRWdelta31"	"iYGRWdelta31"	19910	17570	130	1488	1458	654	62	72	38	100	99	0	1181	1110	480	107	113	43	96	95	0	1.328	1.392	1.363	1.470	1.501	1.390	0.952	120	595	2500	2399	0.409	1426	1074	1396	1003	0
4	20	14	"iYGR191W"	"iYGR191W"	20110	17570	130	2989	2957	1231	64	78	52	100	100	0	2079	1944	796	112	120	41	96	96	0	1.487	1.579	1.573	1.637	1.381	1.561	0.970	120	573	4892	4725	0.572	2925	1967	2893	1832	0
4	21	14	"iYGR195W"	"iYGR195W"	20310	17580	140	1127	1102	520	60	71	54	98	94	0	934	864	379	108	119	90	92	91	0	1.292	1.378	1.356	1.411	1.430	1.329	0.867	156	727	1893	1798	0.369	1067	826	1042	756	0
4	1	15	"iYGR211W"	"iYGR211W"	16310	17760	150	2396	2198	975	57	68	91	100	98	0	1787	1582	690	110	124	109	97	93	0	1.395	1.454	1.465	1.550	1.493	1.451	0.962	156	834	4016	3613	0.480	2339	1677	2141	1472	0
4	2	15	"iYGR215W"	"iYGR215W"	16510	17770	130	729	779	304	57	73	106	100	97	0	875	855	311	106	121	91	97	93	0	0.874	0.964	0.946	1.005	1.589	0.967	0.839	120	609	1441	1471	-0.195	672	769	722	749	0
4	3	15	"iYGRCtau3"	"iYGRCtau3"	16720	17770	140	325	337	144	55	59	21	97	96	0	410	392	157	106	114	60	88	82	0	0.888	0.986	0.954	1.061	1.853	0.962	0.857	156	574	574	568	-0.171	270	304	282	286	0
4	4	15	"iYGR234W"	"iYGR234W"	16910	17770	140	2076	1914	1005	54	58	20	100	100	0	2499	2181	1130	104	109	35	100	98	0	0.844	0.896	0.868	0.947	1.539	0.888	0.927	156	552	4417	3937	-0.244	2022	2395	1860	2077	0
4	5	15	"iYGR238C"	"iYGR238C"	17120	17770	140	1721	1724	910	54	60	25	99	99	0	1186	1124	553	104	107	26	98	97	0	1.541	1.637	1.653	1.710	1.723	1.652	0.947	156	570	2749	2690	0.624	1667	1082	1670	1020	0
4	6	15	"iYGR243W"	"iYGR243W"	17310	17770	140	728	762	375	55	62	26	100	99	0	718	710	308	102	105	25	98	96	0	1.093	1.163	1.151	1.240	1.704	1.180	0.927	156	581	1289	1315	0.128	673	616	707	608	0
4	7	15	"iYHR177W"	"iYHR177W"	17510	17770	140	4364	3843	1820	56	63	37	100	100	0	3329	2874	1433	100	103	24	100	100	0	1.334	1.365	1.366	1.484	1.561	1.349	0.949	156	612	7537	6561	0.416	4308	3229	3787	2774	0
4	8	15	"iYHR180W"	"iYHR180W"	17720	17770	140	5271	4800	2395	55	61	37	100	100	0	4606	4033	2017	99	103	24	100	99	0	1.157	1.206	1.197	1.274	1.488	1.195	0.926	156	552	9723	8679	0.211	5216	4507	4745	3934	0
4	9	15	"iYHR183W"	"iYHR183W"	17910	17770	140	3234	2888	1392	53	57	22	100	100	0	3462	2978	1499	98	101	23	100	97	0	0.946	0.984	0.999	1.087	1.476	0.966	0.959	156	512	6545	5715	-0.081	3181	3364	2835	2880	0
4	10	15	"iYHR200W"	"iYHR200W"	18110	17770	130	601	679	321	54	59	27	100	100	0	521	571	288	97	100	24	98	96	0	1.290	1.319	1.292	1.450	1.729	1.251	0.882	120	538	971	1099	0.367	547	424	625	474	0
4	11	15	"iYHR204W"	"iYHR204W"	18310	17770	140	3057	2841	1301	55	61	29	100	100	0	1465	1360	633	96	100	26	99	98	0	2.193	2.204	2.216	2.363	1.545	2.191	0.963	156	579	4371	4050	1.133	3002	1369	2786	1264	0
4	12	15	"iYHR208W"	"iYHR208W"	18510	17770	130	3614	3347	1437	55	62	28	100	100	0	4673	4122	1878	101	105	25	100	100	0	0.778	0.819	0.809	0.898	1.462	0.793	0.959	120	537	8131	7313	-0.361	3559	4572	3292	4021	0
4	13	15	"iYIL166C"	"iYIL166C"	18710	17770	130	2128	2005	906	55	61	25	100	100	0	2474	2163	1036	102	106	24	99	98	0	0.874	0.946	0.933	1.060	1.535	0.909	0.948	120	537	4445	4011	-0.194	2073	2372	1950	2061	0
4	14	15	"iYIL162W"	"iYIL162W"	18910	17770	140	1922	1749	763	57	61	23	100	100	0	1551	1352	636	102	105	23	100	96	0	1.287	1.354	1.357	1.542	1.676	1.320	0.946	156	548	3314	2942	0.364	1865	1449	1692	1250	0
4	15	15	"iYIL157C"	"iYIL157C"	19110	17770	140	3410	3067	1535	58	62	22	100	100	0	2621	2224	1122	103	106	30	98	97	0	1.331	1.419	1.422	1.555	1.563	1.395	0.914	156	537	5870	5130	0.413	3352	2518	3009	2121	0
4	16	15	"iYIL140W"	"iYIL140W"	19290	17770	130	1242	1224	669	61	70	43	99	97	0	1920	1698	874	108	116	42	95	92	0	0.652	0.731	0.703	0.801	1.635	0.715	0.920	120	523	2993	2753	-0.618	1181	1812	1163	1590	0
4	17	15	"iYIL136W"	"iYIL136W"	19500	17770	130	6456	5825	2905	61	76	56	100	100	0	5908	5111	2593	102	110	47	100	97	0	1.101	1.151	1.162	1.264	1.460	1.138	0.965	120	592	12201	10773	0.139	6395	5806	5764	5009	0
4	18	15	"iYIL133C"	"iYIL133C"	19700	17770	130	2409	2288	1008	59	67	36	100	100	0	1636	1516	672	80	89	41	100	96	0	1.510	1.552	1.541	1.662	1.424	1.539	0.962	120	558	3906	3665	0.595	2350	1556	2229	1436	0
4	19	15	"iYJL112W"	"iYJL112W"	19900	17780	140	3142	2866	1481	60	70	37	100	100	0	2472	2282	1182	98	114	265	88	87	0	1.298	1.285	1.297	1.398	1.666	1.262	0.908	156	577	5456	4990	0.377	3082	2374	2806	2184	0
4	20	15	"iYJL107C"	"iYJL107C"	20100	17770	140	3107	3127	1406	62	74	42	100	100	0	883	840	343	109	128	265	85	73	0	3.934	4.193	4.304	4.254	1.402	4.284	0.940	156	571	3819	3796	1.976	3045	774	3065	731	0
4	21	15	"iYJL104W"	"iYJL104W"	20310	17770	150	2433	2190	1270	61	70	38	98	97	0	2410	2135	1328	110	116	36	93	92	0	1.031	1.051	1.027	1.216	1.741	1.010	0.960	156	826	4672	4154	0.044	2372	2300	2129	2025	0
4	1	16	"iYJL089W"	"iYJL089W"	16300	17970	130	575	573	291	57	62	27	99	95	0	434	432	213	112	123	106	80	68	0	1.609	1.612	1.644	1.743	1.619	1.428	0.660	120	622	840	836	0.686	518	322	516	320	0
4	2	16	"iYJL083W"	"iYJL083W"	16500	17970	130	1956	1867	797	55	61	28	100	100	0	1353	1271	516	104	109	42	98	95	0	1.522	1.553	1.564	1.664	1.653	1.560	0.940	120	534	3150	2979	0.606	1901	1249	1812	1167	0
4	3	16	"iYJL079C"	"iYJL079C"	16700	17970	140	3378	3082	1609	54	59	22	100	100	0	1017	924	428	102	106	25	96	94	0	3.633	3.684	3.724	3.808	1.574	3.822	0.928	156	533	4239	3850	1.861	3324	915	3028	822	0
4	4	16	"iYJL060W"	"iYJL060W"	16900	17970	140	606	601	274	54	59	20	99	97	0	912	855	382	101	105	24	97	94	0	0.681	0.725	0.741	0.775	1.567	0.713	0.909	156	496	1363	1301	-0.555	552	811	547	754	0
4	5	16	"iYJL055W"	"iYJL055W"	17100	17970	140	801	843	411	55	60	22	100	100	0	616	623	298	103	106	23	96	95	0	1.454	1.515	1.496	1.609	1.574	1.489	0.920	156	524	1259	1308	0.540	746	513	788	520	0
4	6	16	"iYJL051W"	"iYJL051W"	17300	17970	130	1282	1302	545	55	59	21	100	100	0	974	930	405	98	101	23	99	97	0	1.401	1.499	1.503	1.679	1.610	1.461	0.934	120	493	2103	2079	0.486	1227	876	1247	832	0
4	7	16	"itR(UCU)J2"	"itR(UCU)J2"	17500	17970	140	551	568	251	54	59	35	98	97	0	365	360	151	95	99	41	91	87	0	1.841	1.940	1.921	2.127	1.647	1.880	0.835	156	544	767	779	0.880	497	270	514	265	0
4	8	16	"iYJLCdelta7"	"iYJLCdelta7"	17710	17970	140	1706	1574	709	53	60	39	100	100	0	1215	1101	475	98	103	44	99	95	0	1.480	1.516	1.515	1.602	1.536	1.527	0.935	156	496	2770	2524	0.565	1653	1117	1521	1003	0
4	9	16	"iYJL034W"	"iYJL034W"	17900	17970	140	1283	1245	569	54	59	23	100	100	0	1907	1722	815	99	103	28	100	99	0	0.680	0.734	0.734	0.785	1.527	0.713	0.935	156	408	3037	2814	-0.557	1229	1808	1191	1623	0
4	10	16	"iYKL134C"	"iYKL134C"	18030	17960	150	510	481	261	54	61	40	89	86	0	506	465	236	98	108	125	79	68	0	1.118	1.163	1.169	1.281	2.080	1.019	0.779	156	492	864	794	0.160	456	408	427	367	0
4	11	16	"iYKL129C"	"iYKL129C"	18230	17970	150	314	368	284	55	61	37	89	86	0	241	252	142	96	105	115	60	17	0	1.786	2.006	1.920	1.892	1.934	1.508	0.511	156	597	404	469	0.837	259	145	313	156	0
4	12	16	"iYKL126W"	"iYKL126W"	18430	17970	150	1224	1124	534	54	60	22	97	95	0	684	615	254	100	102	27	92	90	0	2.003	2.078	2.099	2.133	1.594	2.161	0.930	156	555	1754	1585	1.002	1170	584	1070	515	0
4	13	16	"iYKL108W"	"iYKL108W"	18630	17970	150	2590	2428	1102	54	59	27	100	100	0	2531	2247	1027	102	105	24	98	98	0	1.044	1.107	1.097	1.238	1.703	1.100	0.951	156	603	4965	4519	0.062	2536	2429	2374	2145	0
4	14	16	"iYKL104C"	"iYKL104C"	18830	17970	150	3672	3429	1433	56	60	28	100	100	0	1431	1288	474	104	107	28	99	98	0	2.725	2.849	2.852	2.853	1.443	2.940	0.946	156	581	4943	4557	1.446	3616	1327	3373	1184	0
4	15	16	"iYKL100C"	"iYKL100C"	19030	17970	150	1585	1453	698	57	61	22	99	98	0	851	763	334	103	108	29	95	89	0	2.043	2.115	2.100	2.239	1.656	2.154	0.926	156	547	2276	2056	1.031	1528	748	1396	660	0
4	16	16	"iYKL086W"	"iYKL086W"	19230	17970	150	538	535	332	56	63	32	89	84	0	379	365	192	103	111	38	80	75	0	1.746	1.828	1.765	1.872	2.006	1.835	0.861	156	565	758	741	0.804	482	276	479	262	0
4	17	16	"iYKL081W"	"iYKL081W"	19430	17970	150	1819	1598	910	57	71	60	91	89	0	915	812	407	107	115	45	89	87	0	2.181	2.186	2.221	2.130	1.601	2.231	0.947	156	623	2570	2246	1.125	1762	808	1541	705	0
4	18	16	"iYKL077W"	"iYKL077W"	19630	17970	150	1514	1286	700	58	67	39	92	90	0	1879	1594	867	93	104	62	94	91	0	0.815	0.818	0.816	0.815	1.637	0.808	0.942	156	609	3242	2729	-0.295	1456	1786	1228	1501	0
4	19	16	"iYKLWdelta7"	"iYKLWdelta7"	19830	17970	150	527	512	240	58	65	35	94	91	0	483	470	214	84	105	270	72	23	0	1.175	1.176	1.194	1.246	1.699	1.159	0.889	156	571	868	840	0.233	469	399	454	386	0
4	20	16	"iYKL063C-0"	"iYKL063C-0"	20030	17970	150	3116	2972	1474	59	67	32	100	99	0	1376	1270	592	107	138	409	83	73	0	2.409	2.505	2.551	2.578	1.366	2.511	0.803	156	559	4326	4076	1.268	3057	1269	2913	1163	0
4	21	16	"iYKL060C"	"iYKL060C"	20230	17970	150	1996	1857	1102	61	71	39	100	98	0	2192	1913	1141	112	130	273	83	76	0	0.930	0.997	1.020	1.122	1.790	0.981	0.948	156	733	4015	3597	-0.104	1935	2080	1796	1801	0
4	1	17	"iYLR056W"	"iYLR056W"	16240	18160	150	1399	1265	608	53	58	24	100	99	0	1189	1074	504	108	119	143	90	84	0	1.245	1.255	1.251	1.321	1.474	1.209	0.883	156	710	2427	2178	0.316	1346	1081	1212	966	0
4	2	17	"iYLR060W"	"iYLR060W"	16440	18160	150	458	459	191	53	59	24	98	95	0	556	534	226	101	105	27	94	92	0	0.890	0.938	0.947	0.990	1.430	0.917	0.928	156	563	860	839	-0.168	405	455	406	433	0
4	3	17	"iYLR065C"	"iYLR065C"	16640	18160	150	882	916	477	53	58	22	97	95	0	1422	1396	753	97	101	24	97	95	0	0.626	0.664	0.648	0.706	1.515	0.644	0.941	156	563	2154	2162	-0.677	829	1325	863	1299	0
4	4	17	"iYLR082C"	"iYLR082C"	16840	18160	150	1494	1355	594	54	59	21	100	100	0	1259	1120	497	99	105	68	96	89	0	1.241	1.274	1.279	1.365	1.480	1.256	0.960	156	557	2600	2322	0.312	1440	1160	1301	1021	0
4	5	17	"iYLR086W"	"iYLR086W"	17040	18160	150	1013	986	434	54	57	19	98	97	0	3265	3093	1580	100	107	73	98	96	0	0.303	0.311	0.311	0.338	1.523	0.292	0.937	156	546	4124	3925	-1.723	959	3165	932	2993	0
4	6	17	"iYLR090W"	"iYLR090W"	17240	18160	150	1913	1718	829	54	57	19	100	100	0	1754	1579	780	99	102	22	99	99	0	1.123	1.124	1.154	1.204	1.485	1.106	0.966	156	571	3514	3144	0.168	1859	1655	1664	1480	0
4	7	17	"iYLRCdelta5"	"iYLRCdelta5"	17440	18160	150	459	471	241	54	56	16	96	94	0	532	521	249	95	99	40	91	89	0	0.927	0.979	0.983	1.014	1.887	0.975	0.927	156	565	842	843	-0.110	405	437	417	426	0
4	8	17	"iYLR110C"	"iYLR110C"	17640	18160	150	1183	1141	511	53	55	15	100	100	0	569	528	217	95	99	40	94	91	0	2.384	2.513	2.497	2.643	1.511	2.516	0.922	156	563	1604	1521	1.253	1130	474	1088	433	0
4	9	17	"itR(ACG)L"	"itR(ACG)L"	17840	18160	150	2044	1812	700	53	56	18	100	100	0	1664	1445	567	98	100	23	100	100	0	1.271	1.306	1.284	1.364	1.322	1.292	0.958	156	550	3557	3106	0.346	1991	1566	1759	1347	0
4	10	17	"iYLR129W"	"iYLR129W"	18040	18160	150	979	932	415	52	58	35	100	98	0	1140	1051	474	98	105	108	94	88	0	0.890	0.923	0.926	0.974	1.371	0.891	0.937	156	669	1969	1833	-0.169	927	1042	880	953	0
4	11	17	"iYLR133W"	"iYLR133W"	18310	18170	140	1907	1685	740	53	60	39	100	100	0	1594	1373	619	96	105	110	95	91	0	1.238	1.278	1.295	1.370	1.453	1.186	0.810	156	647	3352	2909	0.308	1854	1498	1632	1277	0
4	12	17	"iYLR137W"	"iYLR137W"	18500	18180	140	1455	1442	677	54	59	25	100	100	0	1177	1095	496	99	102	23	99	98	0	1.300	1.394	1.390	1.490	1.466	1.403	0.943	156	571	2479	2384	0.378	1401	1078	1388	996	0
4	13	17	"iYLR448W"	"iYLR448W"	18700	18170	130	2502	2223	835	54	60	29	100	100	0	1337	1183	459	105	107	26	98	97	0	1.987	2.012	1.986	2.139	1.322	1.984	0.959	120	523	3680	3247	0.991	2448	1232	2169	1078	0
4	14	17	"iYLR452C"	"iYLR452C"	18890	18170	130	3375	2987	1184	56	62	27	100	100	0	1446	1301	550	107	113	57	98	93	0	2.479	2.455	2.420	2.671	1.462	2.429	0.955	120	542	4658	4125	1.310	3319	1339	2931	1194	0
4	15	17	"iYLRCdelta27"	"iYLRCdelta27"	19090	18170	140	4519	4107	2105	56	61	22	100	100	0	3506	3148	1628	104	111	55	100	100	0	1.312	1.331	1.331	1.392	1.334	1.322	0.974	156	607	7865	7095	0.392	4463	3402	4051	3044	0
4	16	17	"iYML129C"	"iYML129C"	19290	18170	130	1408	1281	561	56	68	79	97	92	0	931	876	380	104	113	62	91	89	0	1.635	1.587	1.622	1.687	1.456	1.568	0.955	120	558	2179	1997	0.709	1352	827	1225	772	0
4	17	17	"iYML125C"	"iYML125C"	19490	18170	130	2837	2645	1140	57	74	87	100	98	0	1711	1564	653	103	118	101	96	93	0	1.729	1.771	1.742	1.839	1.432	1.780	0.964	120	542	4388	4049	0.790	2780	1608	2588	1461	0
4	18	17	"iYML121W"	"iYML121W"	19690	18180	140	3218	2780	1181	55	64	40	100	100	0	4998	4241	1857	88	98	60	100	98	0	0.644	0.656	0.656	0.685	1.379	0.650	0.965	156	581	8073	6878	-0.634	3163	4910	2725	4153	0
4	19	17	"iYML105C"	"iYML105C"	19890	18170	130	813	783	279	58	64	27	100	100	0	1520	1367	532	99	104	38	99	99	0	0.531	0.572	0.569	0.611	1.438	0.556	0.956	120	539	2176	1993	-0.912	755	1421	725	1268	0
4	20	17	"iYML100W"	"iYML100W"	20090	18170	130	1531	1406	505	60	69	34	100	100	0	3262	2827	1148	113	134	308	95	90	0	0.467	0.496	0.492	0.530	1.326	0.458	0.911	120	576	4620	4060	-1.098	1471	3149	1346	2714	0
4	21	17	"iYML095C"	"iYML095C"	20290	18170	130	1383	1286	452	61	76	47	100	98	0	1493	1341	519	115	138	286	91	85	0	0.959	0.999	0.991	1.062	1.354	0.964	0.962	120	674	2700	2451	-0.060	1322	1378	1225	1226	0
4	1	18	"iYML077W"	"iYML077W"	16300	18370	140	1484	1482	749	53	59	27	99	99	0	3510	3388	1661	106	115	103	100	99	0	0.420	0.435	0.415	0.432	1.495	0.430	0.949	156	688	4835	4711	-1.250	1431	3404	1429	3282	0
4	2	18	"iYML074C-1"	"iYML074C-1"	16500	18360	140	3821	3506	1781	54	59	25	100	100	0	3029	2686	1295	98	103	26	100	99	0	1.285	1.334	1.333	1.352	1.380	1.353	0.964	156	566	6698	6040	0.362	3767	2931	3452	2588	0
4	3	18	"itR(UCU)M2"	"itR(UCU)M2"	16700	18370	130	1903	2175	1173	54	60	24	100	100	0	1218	1389	786	98	103	34	99	98	0	1.651	1.643	1.671	1.725	1.428	1.606	0.955	120	565	2969	3412	0.723	1849	1120	2121	1291	0
4	4	18	"iYMR210W"	"iYMR210W"	16900	18360	130	661	615	233	56	60	22	100	99	0	657	599	228	101	108	73	95	89	0	1.088	1.122	1.101	1.149	1.346	1.083	0.863	120	561	1161	1057	0.122	605	556	559	498	0
4	5	18	"iYMR214W"	"iYMR214W"	17100	18360	130	863	827	374	55	59	19	100	98	0	825	788	332	103	109	72	94	88	0	1.119	1.127	1.118	1.177	1.458	1.157	0.882	120	561	1530	1457	0.162	808	722	772	685	0
4	6	18	"iYMR218C"	"iYMR218C"	17300	18360	130	666	626	228	53	58	22	100	100	0	412	400	143	98	101	24	98	93	0	1.952	1.897	1.919	2.050	1.563	1.868	0.910	120	574	927	875	0.965	613	314	573	302	0
4	7	18	"iYMR234W"	"iYMR234W"	17500	18360	130	743	757	288	54	61	32	100	100	0	1012	988	397	97	102	35	99	99	0	0.753	0.789	0.760	0.852	1.543	0.754	0.904	120	565	1604	1594	-0.409	689	915	703	891	0
4	8	18	"iYMR238W"	"iYMR238W"	17690	18370	130	336	340	122	55	63	34	99	95	0	598	588	227	97	121	302	80	35	0	0.561	0.580	0.582	0.620	1.573	0.559	0.905	120	564	782	776	-0.834	281	501	285	491	0
4	9	18	"iYMR241W"	"iYMR241W"	17890	18370	130	858	851	307	54	58	21	100	100	0	1192	1132	388	99	118	291	93	85	0	0.736	0.772	0.763	0.780	1.371	0.772	0.944	120	601	1897	1830	-0.443	804	1093	797	1033	0
4	10	18	"iYMR255W"	"iYMR255W"	18110	18370	140	1001	997	476	52	55	17	100	100	0	1455	1408	687	96	98	22	98	98	0	0.698	0.720	0.714	0.767	1.553	0.709	0.953	156	686	2308	2257	-0.518	949	1359	945	1312	0
4	11	18	"iYMR259C"	"iYMR259C"	18300	18370	130	872	852	321	53	59	28	100	100	0	642	616	201	94	97	23	98	96	0	1.495	1.531	1.533	1.562	1.398	1.580	0.933	120	556	1367	1321	0.580	819	548	799	522	0
4	12	18	"iYMR263W"	"iYMR263W"	18510	18370	130	1793	1803	710	55	61	30	100	100	0	1113	1081	391	97	102	44	100	100	0	1.711	1.776	1.779	1.789	1.273	1.826	0.929	120	556	2754	2732	0.775	1738	1016	1748	984	0
4	13	18	"iYMR277W"	"iYMR277W"	18710	18370	140	1990	1968	888	56	62	25	100	99	0	1684	1529	661	100	107	43	100	99	0	1.221	1.338	1.317	1.351	1.405	1.350	0.943	156	616	3518	3341	0.288	1934	1584	1912	1429	0
4	14	18	"iYMR282C"	"iYMR282C"	18910	18370	130	791	767	309	56	63	24	100	100	0	425	407	157	101	107	53	94	85	0	2.269	2.324	2.376	2.465	1.471	2.314	0.764	120	590	1059	1017	1.182	735	324	711	306	0
4	15	18	"iYMR284W"	"iYMR284W"	19120	18370	130	463	462	191	56	61	23	100	98	0	744	684	277	100	107	55	95	93	0	0.632	0.695	0.668	0.715	1.509	0.670	0.895	120	560	1051	990	-0.662	407	644	406	584	0
4	16	18	"iYNL061W"	"iYNL061W"	19300	18370	130	841	814	320	56	68	70	99	95	0	2807	2528	1083	101	114	92	99	97	0	0.290	0.312	0.313	0.331	1.448	0.305	0.949	120	563	3491	3185	-1.785	785	2706	758	2427	0
4	17	18	"iYNL055C"	"iYNL055C"	19500	18370	140	2518	2550	1432	56	68	69	100	98	0	2320	2234	1197	89	100	90	96	92	0	1.104	1.163	1.149	1.226	1.584	1.175	0.961	156	648	4693	4639	0.142	2462	2231	2494	2145	0
4	18	18	"iYNL052W"	"iYNL052W"	19710	18370	140	1158	1096	516	55	61	26	100	100	0	1103	1009	481	80	86	33	97	94	0	1.078	1.121	1.101	1.201	1.536	1.104	0.959	156	572	2126	1970	0.109	1103	1023	1041	929	0
4	19	18	"iYNL036W"	"iYNL036W"	19910	18370	140	439	472	209	59	66	34	98	96	0	1008	1003	439	102	106	39	98	96	0	0.419	0.458	0.433	0.472	1.762	0.439	0.868	156	601	1286	1314	-1.254	380	906	413	901	0
4	20	18	"iYNL035C"	"iYNL035C"	20110	18370	130	467	475	176	59	68	45	99	97	0	588	576	208	106	114	45	98	94	0	0.846	0.885	0.830	0.925	1.767	0.861	0.861	120	560	890	886	-0.240	408	482	416	470	0
4	21	18	"iYNL032W"	"iYNL032W"	20310	18370	140	172	199	103	58	68	45	90	62	0	320	322	120	108	115	41	92	87	0	0.538	0.659	0.588	0.610	2.067	0.692	0.666	156	767	326	355	-0.895	114	212	141	214	0
4	1	19	"iYNL016W"	"iYNL016W"	16310	18560	130	1267	1230	494	52	60	27	100	100	0	795	753	286	109	120	108	93	89	0	1.771	1.829	1.799	1.921	1.386	1.836	0.948	120	630	1901	1822	0.825	1215	686	1178	644	0
4	2	19	"iYNL011C"	"iYNL011C"	16510	18560	140	838	784	383	54	61	26	100	98	0	1187	1047	538	102	108	35	97	93	0	0.723	0.772	0.784	0.875	1.491	0.734	0.939	156	627	1869	1675	-0.469	784	1085	730	945	0
4	3	19	"iYNL007C"	"iYNL007C"	16720	18570	140	1559	1351	661	54	59	22	100	100	0	1133	1009	508	100	105	33	92	91	0	1.457	1.427	1.443	1.578	1.537	1.392	0.962	156	594	2538	2206	0.543	1505	1033	1297	909	0
4	4	19	"iYNR007C"	"iYNR007C"	16910	18560	140	1526	1393	658	56	60	22	100	98	0	939	868	401	101	105	25	96	92	0	1.754	1.743	1.730	1.841	1.334	1.726	0.970	156	626	2308	2104	0.811	1470	838	1337	767	0
4	5	19	"iYNR011C"	"iYNR011C"	17120	18560	140	1391	1266	573	54	59	21	100	100	0	616	565	248	102	105	25	94	92	0	2.601	2.618	2.673	2.830	1.432	1.952	0.314	156	623	1851	1675	1.379	1337	514	1212	463	0
4	6	19	"iYNR015W"	"iYNR015W"	17320	18570	140	623	613	261	53	57	23	100	98	0	592	557	234	99	102	24	95	93	0	1.156	1.223	1.200	1.308	1.531	1.192	0.920	156	604	1063	1018	0.209	570	493	560	458	0
4	7	19	"iYOR055W"	"iYOR055W"	17520	18560	130	1102	1036	466	54	62	35	100	100	0	733	668	279	99	108	47	94	89	0	1.653	1.726	1.700	1.861	1.512	0.612	0.303	120	550	1682	1551	0.725	1048	634	982	569	0
4	8	19	"iYOR058C-1"	"iYOR058C-1"	17710	18570	140	1725	1678	731	55	63	35	100	100	0	1077	984	422	101	126	292	87	76	0	1.711	1.838	1.861	1.918	1.379	1.680	0.651	156	615	2646	2506	0.775	1670	976	1623	883	0
4	9	19	"iYOR060C"	"iYOR060C"	17910	18560	130	1587	1531	723	54	62	42	100	100	0	952	911	429	100	125	306	84	70	0	1.799	1.821	1.872	1.949	1.391	1.795	0.959	120	565	2385	2288	0.847	1533	852	1477	811	0
4	10	19	"iYOR073W"	"iYOR073W"	18100	18570	130	915	890	372	53	60	40	100	100	0	1124	1058	512	98	104	65	95	92	0	0.840	0.872	0.831	1.014	1.759	0.822	0.938	120	560	1888	1797	-0.251	862	1026	837	960	0
4	11	19	"iYOR077W"	"iYOR077W"	18310	18570	140	705	685	289	53	57	21	100	100	0	575	537	232	96	98	22	95	94	0	1.361	1.433	1.450	1.524	1.450	1.388	0.936	156	614	1131	1073	0.445	652	479	632	441	0
4	12	19	"iYOR081C"	"iYOR081C"	18510	18570	140	726	731	334	53	60	26	100	100	0	553	534	230	96	101	43	94	91	0	1.473	1.548	1.551	1.649	1.555	1.541	0.931	156	585	1130	1116	0.558	673	457	678	438	0
4	13	19	"iYOR098C"	"iYOR098C"	18710	18570	140	1824	1646	717	56	62	26	100	100	0	753	703	296	101	107	44	96	92	0	2.712	2.641	2.694	2.830	1.451	2.624	0.960	156	575	2420	2192	1.439	1768	652	1590	602	0
4	14	19	"iYOR103C"	"iYOR103C"	18910	18570	140	4808	4429	1789	57	63	26	100	100	0	2181	1920	733	100	105	24	100	98	0	2.283	2.402	2.390	2.502	1.366	2.434	0.970	156	585	6832	6192	1.191	4751	2081	4372	1820	0
4	15	19	"iYOR108W"	"iYOR108W"	19110	18570	140	2770	2694	1424	56	62	26	100	100	0	1248	1124	555	101	105	24	95	93	0	2.366	2.579	2.573	2.766	1.559	2.600	0.965	156	591	3861	3661	1.243	2714	1147	2638	1023	0
4	16	19	"iYOR125C"	"iYOR125C"	19300	18570	130	409	415	212	56	62	27	95	93	0	338	336	153	99	105	37	85	84	0	1.477	1.515	1.497	1.592	1.658	1.479	0.900	120	555	592	596	0.563	353	239	359	237	0
4	17	19	"iYOR129C"	"iYOR129C"	19500	18570	130	1291	1178	559	54	62	45	100	96	0	418	385	147	82	92	79	88	80	0	3.682	3.710	3.697	3.723	1.550	3.891	0.889	120	589	1573	1427	1.880	1237	336	1124	303	0
4	18	19	"iYOR133W"	"iYOR133W"	19710	18570	140	1457	1302	604	57	64	28	100	99	0	832	760	334	81	88	34	94	91	0	1.864	1.834	1.837	1.903	1.419	1.840	0.952	156	612	2151	1924	0.899	1400	751	1245	679	0
4	19	19	"iYPL241C"	"iYPL241C"	19910	18570	140	738	688	254	65	83	96	96	91	0	401	382	136	108	115	47	92	89	0	2.297	2.274	2.238	2.467	1.637	2.231	0.887	156	564	966	897	1.200	673	293	623	274	0
4	20	19	"iYPL236C"	"iYPL236C"	20110	18570	140	1898	1733	714	65	93	118	98	94	0	595	558	217	108	118	50	92	89	0	3.764	3.707	3.765	3.827	1.361	3.705	0.927	156	614	2320	2118	1.912	1833	487	1668	450	0
4	21	19	"iYPL232W"	"iYPL232W"	20320	18570	140	2821	2671	1166	61	74	53	100	100	0	966	904	373	109	119	66	96	95	0	3.221	3.283	3.267	3.441	1.384	3.298	0.958	156	746	3617	3405	1.687	2760	857	2610	795	0
4	1	20	"iYPL216W"	"iYPL216W"	16310	18760	130	1812	1779	746	54	61	28	100	100	0	1594	1472	628	115	121	80	98	97	0	1.189	1.271	1.255	1.335	1.312	1.263	0.961	120	782	3237	3082	0.249	1758	1479	1725	1357	0
4	2	20	"iYPL212C"	"iYPL212C"	16520	18760	130	842	834	413	53	60	29	100	100	0	680	642	243	107	114	85	98	94	0	1.377	1.460	1.427	1.496	1.434	1.481	0.817	120	676	1362	1316	0.461	789	573	781	535	0
4	3	20	"iYPL208W"	"iYPL208W"	16710	18760	130	2167	1938	785	52	59	31	100	100	0	839	803	323	103	127	469	79	17	0	2.874	2.694	2.716	2.772	1.378	2.787	0.919	120	642	2851	2586	1.523	2115	736	1886	700	0
4	4	20	"iYPL191C"	"iYPL191C"	16910	18760	130	1520	1557	735	53	59	31	100	100	0	1249	1257	667	101	123	458	86	65	0	1.278	1.301	1.316	1.401	1.401	0.916	0.519	120	671	2615	2660	0.354	1467	1148	1504	1156	0
4	5	20	"iYPL187W"	"iYPL187W"	17120	18770	140	1869	1756	766	52	55	17	100	100	0	3043	2698	1258	100	103	24	99	99	0	0.617	0.656	0.662	0.714	1.486	0.640	0.965	156	760	4760	4302	-0.696	1817	2943	1704	2598	0
4	6	20	"iYPL183C"	"iYPL183C"	17310	18760	150	4812	4038	1885	51	54	15	100	100	0	1771	1489	705	99	102	21	99	99	0	2.847	2.868	2.851	3.014	1.389	2.839	0.964	156	738	6433	5377	1.510	4761	1672	3987	1390	0
4	7	20	"iYPL170W"	"iYPL170W"	17510	18770	140	3324	2980	1493	52	55	20	100	100	0	2303	1990	987	102	106	39	99	98	0	1.487	1.551	1.543	1.647	1.410	1.551	0.961	156	760	5473	4816	0.572	3272	2201	2928	1888	0
4	8	20	"iYPL165C"	"iYPL165C"	17720	18770	140	1595	1508	736	52	56	19	100	100	0	1589	1488	759	102	105	39	98	97	0	1.038	1.051	1.051	1.144	1.420	1.025	0.951	156	754	3030	2842	0.053	1543	1487	1456	1386	0
4	9	20	"iYPL161C"	"iYPL161C"	17910	18760	130	1584	1574	853	52	60	40	99	99	0	683	718	356	100	111	106	95	85	0	2.628	2.463	2.425	2.465	1.355	1.271	0.580	120	657	2115	2140	1.394	1532	583	1522	618	0
4	10	20	"iYPR149W"	"iYPR149W"	18120	18770	140	1654	1522	703	52	56	21	100	100	0	1882	1573	741	96	104	93	96	94	0	0.897	0.995	1.008	1.068	1.457	0.894	0.807	156	777	3388	2947	-0.157	1602	1786	1470	1477	0
4	11	20	"iYPR154W"	"iYPR154W"	18320	18770	140	2032	1931	1028	51	55	17	100	100	0	2571	2339	1249	94	96	23	100	100	0	0.800	0.837	0.842	0.913	1.467	0.828	0.957	156	696	4458	4125	-0.322	1981	2477	1880	2245	0
4	12	20	"iYPR158W"	"iYPR158W"	18510	18770	140	1447	1289	577	51	60	84	100	94	0	843	746	317	97	101	23	97	96	0	1.871	1.908	1.904	1.977	1.350	1.904	0.961	156	710	2142	1887	0.904	1396	746	1238	649	0
4	13	20	"iYPRCtau3"	"iYPRCtau3"	18720	18770	140	6042	5597	2338	54	63	83	100	100	0	4350	3875	1667	101	105	26	100	100	0	1.409	1.469	1.473	1.545	1.323	1.462	0.970	156	728	10237	9317	0.495	5988	4249	5543	3774	0
4	14	20	"iYPR173C"	"iYPR173C"	18920	18770	140	2187	2184	1149	55	60	24	100	100	0	1724	1646	862	103	106	25	100	98	0	1.315	1.380	1.390	1.487	1.414	1.369	0.964	156	710	3753	3672	0.395	2132	1621	2129	1543	0
4	15	20	"iYPR179C"	"iYPR179C"	19120	18770	140	913	800	365	57	62	24	99	97	0	912	801	384	103	106	25	92	92	0	1.058	1.064	1.050	1.165	1.511	1.026	0.941	156	713	1665	1441	0.081	856	809	743	698	0
4	16	20	"iYPR195C-0"	"iYPR195C-0"	19320	18770	140	429	407	155	57	65	43	98	91	0	531	480	192	98	107	69	89	85	0	0.859	0.916	0.904	1.005	1.705	0.852	0.898	156	743	805	732	-0.219	372	433	350	382	0
4	17	20	"iYPRWtau4"	"iYPRWtau4"	19510	18770	130	307	316	114	55	74	252	50	0	0	331	327	116	88	98	80	89	75	0	1.037	1.092	1.075	1.137	1.493	4.216	0.189	120	657	495	500	0.052	252	243	261	239	0
4	18	20	"iYPR200C"	"iYPR200C"	19720	18770	140	331	325	130	57	74	233	68	3	0	355	335	128	95	102	47	89	83	0	1.054	1.117	1.099	1.108	1.438	4.171	0.221	156	752	534	508	0.076	274	260	268	240	0
4	19	20	"YDRCTy1-2A"	"YDRCTy1-2A"	19920	18770	150	18573	16630	7860	65	94	152	100	100	0	14912	12660	6083	113	128	78	100	100	0	1.251	1.320	1.318	1.390	1.302	1.315	0.975	156	766	33307	29112	0.323	18508	14799	16565	12547	0
4	20	20	"YDRWdelta12"	"YDRWdelta12"	20120	18780	150	28403	25583	11952	68	116	235	100	100	0	9612	8354	3959	112	137	131	100	98	0	2.983	3.096	3.126	3.277	1.321	3.092	0.977	156	825	37835	33757	1.577	28335	9500	25515	8242	0
4	21	20	"YERWdelta9"	"YERWdelta9"	20330	18770	150	10035	10446	5388	62	105	203	100	100	0	4692	4641	2250	108	155	584	95	91	0	2.176	2.291	2.249	2.339	1.247	2.336	0.976	156	965	14557	14917	1.121	9973	4584	10384	4533	0
5	1	1	"YBR061C"	"YBR061C"	2750	19500	160	779	1725	1959	53	58	48	98	95	0	1114	2185	2306	88	94	57	99	98	0	0.708	0.797	0.725	0.723	1.503	0.835	0.961	208	1070	1752	3769	-0.499	726	1026	1672	2097	0
5	2	1	"MRS5"	"YBR091C"	3000	19500	150	995	1488	1222	54	73	138	91	85	0	496	663	492	89	105	91	83	75	0	2.312	2.498	2.411	2.678	1.634	2.511	0.951	156	793	1348	2008	1.209	941	407	1434	574	0
5	3	1	"TFC1"	"YBR123C"	3190	19500	140	2365	3808	3475	55	88	159	94	89	0	1944	2733	2363	94	126	126	96	86	0	1.249	1.422	1.376	1.393	1.544	1.450	0.949	156	728	4160	6392	0.320	2310	1850	3753	2639	0
5	4	1	"YBR063C"	"YBR063C"	3390	19510	130	2906	3359	2566	56	80	115	95	88	0	1965	2232	1689	94	120	137	85	79	0	1.523	1.545	1.558	1.616	1.444	1.528	0.956	120	675	4721	5441	0.607	2850	1871	3303	2138	0
5	5	1	"PHO5"	"YBR093C"	3580	19520	110	833	1354	1372	55	63	32	96	92	0	691	1236	1373	92	98	31	92	82	0	1.299	1.135	1.297	1.429	1.563	1.030	0.948	80	481	1377	2443	0.377	778	599	1299	1144	0
5	6	1	"PTC4"	"YBR125C"	3760	19540	130	3649	4812	3620	54	61	39	100	100	0	2323	2993	2131	91	99	59	100	100	0	1.611	1.640	1.606	1.622	1.396	1.711	0.965	120	670	5827	7660	0.688	3595	2232	4758	2902	0
5	7	1	"ECM2"	"YBR065C"	3980	19500	140	4383	5426	3641	54	59	22	100	100	0	2918	3389	2227	92	96	25	100	99	0	1.532	1.629	1.612	1.682	1.399	1.637	0.958	156	798	7155	8669	0.615	4329	2826	5372	3297	0
5	8	1	"YBR095C"	"YBR095C"	4170	19530	130	2771	3609	2661	55	61	25	100	100	0	1931	2641	1941	93	97	23	100	100	0	1.478	1.395	1.432	1.461	1.455	1.395	0.956	120	625	4554	6102	0.563	2716	1838	3554	2548	0
5	9	1	"VMA2"	"YBR127C"	4360	19510	130	2173	3124	2532	55	60	24	100	100	0	1553	2010	1581	90	94	22	99	98	0	1.448	1.598	1.624	1.686	1.616	1.610	0.962	120	689	3581	4989	0.534	2118	1463	3069	1920	0
5	10	1	"TIP1"	"YBR067C"	4570	19510	130	2637	3279	2367	54	59	22	99	98	0	1489	1871	1397	92	94	22	97	95	0	1.849	1.813	1.851	1.993	1.629	1.776	0.958	120	696	3980	5004	0.887	2583	1397	3225	1779	0
5	11	1	"VPS15"	"YBR097W"	4750	19520	100	715	1073	1130	56	74	110	91	75	0	663	955	1047	92	102	73	86	72	0	1.154	1.178	1.169	1.332	1.651	1.130	0.942	80	454	1230	1880	0.207	659	571	1017	863	0
5	12	1	"OPY1"	"YBR129C"	4960	19520	120	2391	2957	2276	55	70	96	100	91	0	1563	1869	1405	92	100	64	97	90	0	1.588	1.633	1.647	1.687	1.461	1.642	0.964	120	611	3807	4679	0.667	2336	1471	2902	1777	0
5	13	1	"THR4"	"YCR053W"	5160	19500	150	3520	4977	3735	55	62	31	100	99	0	4251	6063	4378	91	94	25	100	100	0	0.833	0.824	0.818	0.797	1.390	0.835	0.970	156	823	7625	10894	-0.264	3465	4160	4922	5972	0
5	14	1	"YCR086W"	"YCR086W"	5370	19510	140	1992	2945	2480	54	62	35	100	98	0	984	1250	977	90	95	28	98	93	0	2.168	2.492	2.533	2.525	1.494	2.543	0.965	156	742	2832	4051	1.116	1938	894	2891	1160	0
5	15	1	"YCRX10W"	"YCRX10W"	5570	19510	130	1235	1624	1227	52	57	23	100	99	0	3243	4346	3574	88	94	27	100	100	0	0.375	0.369	0.373	0.396	1.542	0.345	0.942	120	651	4338	5830	-1.415	1183	3155	1572	4258	0
5	16	1	"YCR055C"	"YCR055C"	5770	19520	120	3355	4240	3457	52	58	41	100	100	0	3686	4615	3894	90	97	67	100	98	0	0.919	0.926	0.927	0.948	1.432	0.907	0.970	120	601	6899	8713	-0.123	3303	3596	4188	4525	0
5	17	1	"ABP1"	"YCR088W"	5970	19510	130	3873	4848	4128	52	58	37	100	100	0	1270	1807	1517	93	98	61	97	90	0	3.246	2.798	2.875	2.970	1.623	2.804	0.960	120	721	4998	6510	1.699	3821	1177	4796	1714	0
5	18	1	"YCRX12W"	"YCRX12W"	6170	19510	130	1095	1641	1391	53	57	19	100	100	0	814	1326	1156	94	96	22	97	95	0	1.447	1.289	1.317	1.497	1.744	1.246	0.956	120	742	1762	2820	0.533	1042	720	1588	1232	0
5	19	1	"PWP2"	"YCR057C"	6370	19520	110	2368	2974	2581	53	58	25	98	97	0	2017	2959	2744	93	97	34	98	96	0	1.203	1.019	1.071	1.153	1.480	0.963	0.963	80	562	4239	5787	0.267	2315	1924	2921	2866	0
5	20	1	"YCR090C"	"YCR090C"	6570	19520	120	1846	2361	2011	52	57	22	100	100	0	2624	3471	2979	91	99	100	100	92	0	0.708	0.683	0.687	0.713	1.529	0.674	0.960	120	652	4327	5689	-0.498	1794	2533	2309	3380	0
5	21	1	"YCRX14W"	"YCRX14W"	6770	19520	120	1069	1615	1487	54	59	22	98	96	0	685	1235	1146	90	102	108	78	70	0	1.706	1.363	1.397	1.565	1.929	1.327	0.941	120	699	1610	2706	0.771	1015	595	1561	1145	0
5	1	2	"YCR059C"	"YCR059C"	2780	19700	140	707	1264	1141	54	60	58	95	89	0	551	1065	935	88	95	68	91	83	0	1.410	1.238	1.211	1.282	1.502	1.239	0.924	156	683	1116	2187	0.496	653	463	1210	977	0
5	2	2	"MSH3"	"YCR092C"	2980	19700	140	1275	2480	2451	53	65	142	95	91	0	2106	3681	3595	90	98	82	99	95	0	0.606	0.676	0.654	0.688	1.503	0.672	0.946	156	589	3238	6018	-0.722	1222	2016	2427	3591	0
5	3	2	"YCRX16C"	"YCRX16C"	3170	19700	130	1085	1698	1587	52	65	147	88	78	0	647	1031	965	90	97	56	85	81	0	1.855	1.749	1.788	2.038	2.002	1.676	0.924	120	540	1590	2587	0.891	1033	557	1646	941	0
5	4	2	"YDR060W"	"YDR060W"	3380	19710	120	702	1343	1361	54	62	56	90	86	0	660	1210	1293	89	95	36	91	87	0	1.135	1.150	1.240	1.339	1.880	1.090	0.939	120	569	1219	2410	0.183	648	571	1289	1121	0
5	5	2	"UBC13"	"YDR092W"	3580	19700	130	1995	2888	2224	56	61	25	100	98	0	667	776	538	90	95	30	89	87	0	3.360	4.128	4.122	4.413	1.688	4.224	0.941	120	592	2516	3518	1.749	1939	577	2832	686	0
5	6	2	"YDR124W"	"YDR124W"	3760	19730	130	2734	3377	2629	54	62	42	100	100	0	4007	4248	3286	92	101	65	100	100	0	0.685	0.800	0.781	0.822	1.513	0.796	0.934	120	572	6595	7479	-0.547	2680	3915	3323	4156	0
5	7	2	"LCB2"	"YDR062W"	3980	19700	120	3565	4047	2553	54	62	44	100	100	0	3276	4097	2638	93	102	64	99	99	0	1.103	0.997	0.967	1.013	1.422	0.975	0.961	120	586	6694	7997	0.141	3511	3183	3993	4004	0
5	8	2	"YDR094W"	"YDR094W"	4190	19720	130	1034	1276	915	54	59	26	98	97	0	483	574	369	93	96	28	86	85	0	2.513	2.541	2.606	2.828	1.744	2.631	0.907	120	598	1370	1703	1.329	980	390	1222	481	0
5	9	2	"YDR126W"	"YDR126W"	4390	19710	120	3069	3829	2800	54	59	24	100	100	0	1157	1558	1118	89	92	23	99	98	0	2.823	2.570	2.588	2.703	1.489	2.613	0.935	120	589	4083	5244	1.497	3015	1068	3775	1469	0
5	10	2	"RPS13"	"YDR064W"	4590	19710	130	2939	3720	2633	55	60	25	100	100	0	2380	2859	2013	90	94	25	100	100	0	1.259	1.324	1.279	1.341	1.572	1.327	0.930	120	640	5174	6434	0.333	2884	2290	3665	2769	0
5	11	2	"GIS1"	"YDR096W"	4790	19700	130	3200	4793	3752	56	69	88	100	96	0	3149	4374	3319	91	99	64	100	100	0	1.028	1.106	1.073	1.086	1.455	1.110	0.948	120	614	6202	9020	0.040	3144	3058	4737	4283	0
5	12	2	"YDR128W"	"YDR128W"	4990	19710	130	3838	5283	3831	56	63	30	100	100	0	5791	8009	6142	92	97	35	100	100	0	0.664	0.660	0.660	0.694	1.424	0.641	0.947	120	543	9481	13144	-0.592	3782	5699	5227	7917	0
5	13	2	"YDR066C"	"YDR066C"	5180	19710	140	2097	2795	2231	56	63	30	99	98	0	3241	3944	2980	92	96	28	99	99	0	0.648	0.711	0.699	0.684	1.504	0.721	0.948	156	649	5190	6591	-0.626	2041	3149	2739	3852	0
5	14	2	"GRX3"	"YDR098C"	5380	19710	120	3599	4373	3074	53	59	29	100	100	0	1517	1667	1133	91	94	25	97	95	0	2.487	2.741	2.684	2.914	1.564	2.801	0.936	120	550	4972	5896	1.314	3546	1426	4320	1576	0
5	15	2	"YDR130C"	"YDR130C"	5570	19700	130	3327	4606	3580	54	68	157	100	95	0	1903	2125	1584	91	100	76	98	90	0	1.806	2.238	2.313	2.329	1.467	2.239	0.952	120	657	5085	6586	0.853	3273	1812	4552	2034	0
5	16	2	"SSN2"	"YDR443C"	5790	19710	120	2150	2700	2239	53	71	169	92	85	0	1382	2072	1835	89	102	100	93	86	0	1.622	1.335	1.367	1.476	1.646	1.288	0.891	120	591	3390	4630	0.698	2097	1293	2647	1983	0
5	17	2	"YDR475C"	"YDR475C"	5990	19720	100	1595	1875	1458	55	60	33	100	96	0	958	1146	990	90	103	108	80	76	0	1.774	1.723	1.765	2.321	2.252	1.636	0.883	80	477	2408	2876	0.827	1540	868	1820	1056	0
5	18	2	"GIN4"	"YDR507C"	6180	19720	110	800	1111	1102	54	62	38	100	87	0	720	1090	1198	92	102	84	78	70	0	1.188	1.059	1.052	1.303	1.910	0.936	0.884	80	554	1374	2055	0.248	746	628	1057	998	0
5	19	2	"YDR445C"	"YDR445C"	6380	19720	100	1238	1145	749	53	59	35	98	91	0	851	902	679	91	96	36	81	78	0	1.559	1.346	1.381	1.826	2.232	1.257	0.881	80	495	1945	1903	0.641	1185	760	1092	811	0
5	20	2	"SNF1"	"YDR477W"	6580	19720	110	1855	1795	1277	52	61	65	97	90	0	1207	1432	1114	90	98	66	86	81	0	1.614	1.299	1.255	1.576	1.675	1.229	0.930	80	549	2920	3085	0.691	1803	1117	1743	1342	0
5	21	2	"YDR509W"	"YDR509W"	6790	19720	110	1028	1379	1072	55	64	64	98	95	0	848	1272	1118	90	100	77	92	86	0	1.284	1.120	1.186	1.345	1.719	1.022	0.880	80	583	1731	2506	0.360	973	758	1324	1182	0
5	1	3	"RPS17B"	"YDR447C"	2780	19900	140	538	1276	1206	53	57	26	100	100	0	622	1428	1387	89	93	31	98	95	0	0.910	0.913	0.870	0.969	1.695	0.887	0.930	156	733	1018	2562	-0.136	485	533	1223	1339	0
5	2	3	"YDR479C"	"YDR479C"	3000	19900	150	2692	3664	2688	52	58	27	100	100	0	2339	3382	2452	91	95	33	100	100	0	1.174	1.098	1.055	1.085	1.575	1.096	0.903	156	660	4888	6903	0.232	2640	2248	3612	3291	0
5	3	3	"YDR511W"	"YDR511W"	3200	19900	140	828	1352	1196	53	60	56	96	91	0	547	908	767	90	96	36	92	88	0	1.696	1.588	1.634	1.667	1.977	1.600	0.920	156	597	1232	2117	0.762	775	457	1299	818	0
5	4	3	"YDR449C"	"YDR449C"	3390	19920	140	1382	2190	1759	54	60	29	100	100	0	1207	1915	1548	91	95	27	99	99	0	1.190	1.171	1.105	1.215	1.622	1.161	0.921	156	685	2444	3960	0.251	1328	1116	2136	1824	0
5	5	3	"PHO8"	"YDR481C"	3590	19910	110	1104	1359	1154	54	62	33	98	95	0	1129	1516	1273	90	96	35	95	87	0	1.011	0.915	0.935	1.074	1.963	0.912	0.892	80	545	2089	2731	0.015	1050	1039	1305	1426	0
5	6	3	"TTR1"	"YDR513W"	3800	19910	120	2324	2792	2067	54	59	28	100	100	0	1261	1481	1053	90	96	32	99	96	0	1.939	1.968	2.003	2.061	1.902	2.017	0.894	120	594	3441	4129	0.955	2270	1171	2738	1391	0
5	7	3	"SPB4"	"YFL002C"	4000	19900	130	2890	3728	2721	53	57	23	100	100	0	8288	9290	6697	92	96	31	100	100	0	0.346	0.400	0.387	0.401	1.675	0.385	0.908	120	657	11033	12873	-1.531	2837	8196	3675	9198	0
5	8	3	"HAC1"	"YFL031W"	4200	19910	120	1859	2103	1431	53	60	28	100	100	0	1203	1436	972	93	98	40	98	94	0	1.627	1.526	1.559	1.634	1.646	1.529	0.915	120	544	2916	3393	0.702	1806	1110	2050	1343	0
5	9	3	"YFL061W"	"YFL061W"	4390	19930	120	3457	3674	2476	54	63	35	100	100	0	2153	2483	1649	91	98	42	100	98	0	1.650	1.513	1.470	1.563	1.604	1.540	0.926	120	525	5465	6012	0.723	3403	2062	3620	2392	0
5	10	3	"YFL004W"	"YFL004W"	4590	19940	140	1483	2703	2360	56	63	31	100	100	0	5367	8034	6945	91	96	30	100	100	0	0.270	0.333	0.316	0.332	1.766	0.326	0.914	156	628	6703	10590	-1.886	1427	5276	2647	7943	0
5	11	3	"RIM15"	"YFL033C"	4790	19910	130	2325	2733	2098	56	64	31	100	100	0	2874	3106	2440	91	96	31	100	100	0	0.815	0.888	0.941	0.958	1.700	0.867	0.884	120	623	5052	5692	-0.295	2269	2783	2677	3015	0
5	12	3	"YFL063W"	"YFL063W"	5000	19910	140	20337	29292	23426	57	66	54	100	100	11	11634	15751	12321	95	102	38	100	100	0	1.758	1.867	1.794	1.771	1.580	1.916	0.940	156	718	31819	44891	0.814	20280	11539	29235	15656	0
5	13	3	"YFL006W"	"YFL006W"	5200	19910	110	5581	5944	4089	57	103	432	93	83	0	4339	4560	3324	96	142	425	86	76	0	1.302	1.319	1.271	1.392	1.646	1.301	0.935	80	505	9767	10351	0.381	5524	4243	5887	4464	0
5	14	3	"YFL035C"	"YFL035C"	5390	19940	130	4129	4873	3769	55	96	384	93	88	0	4546	5359	3903	94	135	382	90	83	0	0.915	0.915	0.836	0.909	1.603	0.942	0.926	120	668	8526	10083	-0.128	4074	4452	4818	5265	0
5	15	3	"YFL065C"	"YFL065C"	5600	19930	130	13966	15410	10464	55	73	141	100	100	0	6007	6675	4503	95	106	113	100	100	0	2.353	2.334	2.261	2.331	1.548	2.392	0.929	120	660	19823	21935	1.235	13911	5912	15355	6580	0
5	16	3	"SMC1"	"YFL008W"	5790	19910	130	4132	5660	4436	53	60	37	100	100	0	3491	4619	3755	88	95	63	100	100	0	1.199	1.237	1.185	1.308	1.580	1.220	0.938	120	672	7482	10138	0.261	4079	3403	5607	4531	0
5	17	3	"YFL035C-B"	"YFL035C-B"	6010	19920	120	2599	4125	3479	53	63	74	100	98	0	2235	3235	2750	89	104	104	99	94	0	1.186	1.294	1.297	1.340	1.575	1.290	0.928	120	606	4692	7218	0.247	2546	2146	4072	3146	0
5	18	3	"YFL067W"	"YFL067W"	6200	19930	130	11043	15306	12403	55	62	64	100	100	0	4891	7368	6521	92	110	221	99	93	0	2.290	2.096	1.910	2.321	1.893	2.075	0.885	120	650	15787	22527	1.195	10988	4799	15251	7276	0
5	19	3	"RTG2"	"YGL252C"	6400	19920	130	6434	6625	4510	54	58	19	100	100	0	10097	9883	6456	94	98	27	100	100	0	0.638	0.671	0.647	0.653	1.623	0.672	0.933	120	666	16383	16360	-0.649	6380	10003	6571	9789	0
5	20	3	"YGR021W"	"YGR021W"	6600	19920	120	2488	4027	3357	52	59	59	100	100	0	1738	2732	2278	94	99	62	100	100	0	1.482	1.507	1.503	1.567	1.723	1.512	0.927	120	595	4080	6613	0.567	2436	1644	3975	2638	0
5	21	3	"YGR053C"	"YGR053C"	6790	19930	120	2304	3069	2390	53	57	22	100	100	0	1953	2916	2378	89	96	90	96	90	0	1.208	1.067	1.001	1.152	2.002	1.040	0.883	120	641	4115	5843	0.272	2251	1864	3016	2827	0
5	1	4	"FZF1"	"YGL254W"	2800	20100	140	2001	2343	1553	51	55	22	100	100	0	2030	2478	1653	91	94	31	100	99	0	1.006	0.960	0.923	1.011	1.621	0.940	0.901	156	763	3889	4679	0.008	1950	1939	2292	2387	0
5	2	4	"MTL1"	"YGR023W"	3010	20120	140	4638	6793	5222	53	57	19	100	100	0	4706	6145	4530	91	93	22	100	100	0	0.993	1.113	1.036	1.094	1.601	1.135	0.931	156	645	9200	12794	-0.009	4585	4615	6740	6054	0
5	3	4	"MUP1"	"YGR055W"	3210	20110	140	2101	3568	2838	54	58	20	100	100	0	1378	1942	1493	88	95	85	96	89	0	1.587	1.895	1.775	1.888	1.680	1.937	0.931	156	632	3337	5368	0.666	2047	1290	3514	1854	0
5	4	4	"ADH4"	"YGL256W"	3400	20150	150	1472	2715	2567	53	58	27	100	99	0	1266	2353	2115	90	112	289	92	80	0	1.207	1.176	1.133	1.139	1.637	1.205	0.884	156	634	2595	4925	0.271	1419	1176	2662	2263	0
5	5	4	"YGR025W"	"YGR025W"	3600	20130	120	934	1007	710	54	59	24	98	96	0	838	1042	810	90	111	295	68	54	0	1.176	1.001	0.943	1.189	2.264	0.803	0.665	120	557	1628	1905	0.234	880	748	953	952	0
5	6	4	"LST7"	"YGR057C"	3790	20130	130	1534	2375	1919	54	63	44	100	98	0	2501	4298	3668	92	108	113	100	97	0	0.614	0.552	0.519	0.569	1.749	0.524	0.907	120	609	3889	6527	-0.703	1480	2409	2321	4206	0
5	7	4	"YGL258W"	"YGL258W"	3990	20130	130	2194	2987	2406	54	66	56	99	97	0	1542	2238	1975	93	114	125	90	81	0	1.477	1.367	1.315	1.638	2.003	1.309	0.901	120	677	3589	5078	0.563	2140	1449	2933	2145	0
5	8	4	"RPS25A"	"YGR027C"	4200	20120	120	795	1346	1211	55	67	52	93	90	0	803	1386	1277	93	105	78	88	80	0	1.042	0.998	0.972	1.057	1.717	0.966	0.927	120	601	1450	2584	0.060	740	710	1291	1293	0
5	9	4	"SPR3"	"YGR059W"	4400	20110	130	1919	2924	2626	55	62	31	100	99	0	1591	2600	2340	94	100	39	100	99	0	1.245	1.145	1.132	1.247	1.658	1.142	0.922	120	592	3361	5375	0.316	1864	1497	2869	2506	0
5	10	4	"PPA1"	"YHR026W"	4610	20110	140	2467	3974	3663	54	60	24	99	99	0	1696	2578	2397	92	96	25	98	97	0	1.504	1.577	1.589	1.642	1.959	1.581	0.899	156	613	4017	6406	0.589	2413	1604	3920	2486	0
5	11	4	"YHR056C"	"YHR056C"	4800	20120	130	1616	2536	2216	54	60	25	100	99	0	1495	2308	2037	93	97	25	99	99	0	1.114	1.121	1.170	1.215	1.707	1.112	0.851	120	638	2964	4697	0.156	1562	1402	2482	2215	0
5	12	4	"YHR087W"	"YHR087W"	5010	20120	130	1378	1925	1603	54	59	21	100	99	0	912	1649	1476	95	110	313	73	55	0	1.621	1.204	1.264	1.440	1.793	1.090	0.811	120	629	2141	3425	0.696	1324	817	1871	1554	0
5	13	4	"DAP2"	"YHR028C"	5210	20140	120	1585	2894	2616	54	69	132	96	93	0	1886	3255	2928	94	124	357	87	71	0	0.854	0.898	0.881	0.925	1.793	0.893	0.887	120	603	3323	6001	-0.227	1531	1792	2840	3161	0
5	14	4	"MED6"	"YHR058C"	5400	20130	130	2548	3547	2860	54	58	20	100	100	0	3257	4316	3628	92	96	23	100	100	0	0.788	0.827	0.839	0.873	1.645	0.799	0.914	120	583	5659	7717	-0.344	2494	3165	3493	4224	0
5	15	4	"GAR1"	"YHR089C"	5600	20130	120	1830	2633	2184	53	58	22	100	99	0	2345	2941	2456	90	95	26	98	98	0	0.788	0.905	0.966	1.023	1.819	0.893	0.899	120	543	4032	5431	-0.344	1777	2255	2580	2851	0
5	16	4	"SLT2"	"YHR030C"	5800	20140	120	2635	3402	2798	51	56	38	100	100	0	1890	2719	2346	84	91	100	97	88	0	1.431	1.272	1.247	1.343	1.619	1.242	0.916	120	604	4390	5986	0.517	2584	1806	3351	2635	0
5	17	4	"VMA22"	"YHR060W"	6000	20130	120	1804	2252	1755	51	54	16	100	100	0	874	1037	781	85	87	19	97	91	0	2.222	2.312	2.384	2.580	2.102	2.359	0.895	120	559	2542	3153	1.152	1753	789	2201	952	0
5	18	4	"MSR1"	"YHR091C"	6200	20140	120	1700	2024	1580	53	57	32	100	99	0	3409	4718	3873	88	103	223	96	88	0	0.496	0.426	0.410	0.445	1.652	0.401	0.900	120	577	4968	6601	-1.012	1647	3321	1971	4630	0
5	19	4	"YHR032W"	"YHR032W"	6400	20140	120	1462	1748	1366	53	58	29	100	100	0	2144	2850	2361	91	99	51	100	99	0	0.686	0.614	0.610	0.659	1.717	0.583	0.902	120	577	3462	4454	-0.543	1409	2053	1695	2759	0
5	20	4	"RPP1"	"YHR062C"	6590	20130	110	570	806	666	52	61	44	98	95	0	908	963	739	90	100	63	92	90	0	0.633	0.864	0.854	0.956	2.143	0.840	0.770	80	511	1336	1627	-0.659	518	818	754	873	0
5	21	4	"AHT1"	"YHR093W"	6800	20130	120	3247	4077	3246	53	61	41	100	100	0	1543	2030	1638	88	99	97	97	88	0	2.195	2.072	2.135	2.240	1.614	2.080	0.917	120	675	4649	5966	1.134	3194	1455	4024	1942	0
5	1	5	"PAN1"	"YIR006C"	2820	20310	150	1354	2417	2182	52	54	14	100	100	0	1012	1818	1619	89	91	20	100	100	0	1.411	1.368	1.332	1.392	1.502	1.371	0.953	156	866	2225	4094	0.496	1302	923	2365	1729	0
5	2	5	"GTT1"	"YIR038C"	3020	20320	130	1925	2439	1722	53	57	21	100	100	0	1978	2336	1688	91	93	24	100	100	0	0.992	1.063	1.065	1.093	1.395	1.040	0.959	120	552	3759	4631	-0.012	1872	1887	2386	2245	0
5	3	5	"RNR2"	"YJL026W"	3220	20340	120	766	1280	1126	52	56	22	100	99	0	611	1087	951	87	95	95	90	83	0	1.363	1.228	1.230	1.321	1.686	1.213	0.952	120	499	1238	2228	0.446	714	524	1228	1000	0
5	4	5	"PRI1"	"YIR008C"	3410	20310	130	1577	2501	2114	52	60	55	99	96	0	1714	2582	2187	87	98	105	99	89	0	0.937	0.982	0.968	0.989	1.491	0.950	0.949	120	495	3152	4944	-0.093	1525	1627	2449	2495	0
5	5	5	"YIR040C"	"YIR040C"	3610	20320	130	4374	5902	4707	54	67	130	100	95	0	2526	3738	3109	88	95	51	100	100	0	1.772	1.602	1.585	1.638	1.410	1.568	0.953	120	603	6758	9498	0.825	4320	2438	5848	3650	0
5	6	5	"YJL028W"	"YJL028W"	3810	20320	120	1458	1866	1472	53	64	129	91	83	0	719	910	686	91	95	35	94	86	0	2.237	2.214	2.198	2.406	1.992	2.237	0.928	120	564	2033	2632	1.162	1405	628	1813	819	0
5	7	5	"YIR010W"	"YIR010W"	4000	20320	110	2147	2535	2211	54	94	283	85	75	0	2112	2756	2509	92	133	354	77	68	0	1.036	0.931	0.977	1.021	1.696	0.894	0.947	80	486	4113	5145	0.051	2093	2020	2481	2664	0
5	8	5	"YIR042C"	"YIR042C"	4210	20330	120	492	710	557	55	92	261	70	46	0	759	1001	818	93	131	328	65	50	0	0.656	0.721	0.712	0.756	1.762	0.695	0.945	120	570	1103	1563	-0.608	437	666	655	908	0
5	9	5	"MAD2"	"YJL030W"	4410	20330	120	2273	2724	2052	54	61	30	100	100	0	2286	3365	2615	94	97	26	100	100	0	1.012	0.816	0.805	0.863	1.421	0.799	0.953	120	571	4411	5941	0.018	2219	2192	2670	3271	0
5	10	5	"SQT1"	"YIR012W"	4610	20320	130	2686	3382	2682	54	62	40	100	100	0	3626	4884	3978	94	103	91	100	100	0	0.745	0.695	0.726	0.736	1.346	0.680	0.949	120	649	6164	8118	-0.424	2632	3532	3328	4790	0
5	11	5	"YIR044C"	"YIR044C"	4810	20340	120	1018	1471	1217	55	77	153	89	74	0	988	1453	1247	95	109	100	88	79	0	1.078	1.043	1.072	1.204	1.767	1.014	0.934	120	581	1856	2774	0.109	963	893	1416	1358	0
5	12	5	"YJL032W"	"YJL032W"	5010	20320	120	799	895	621	55	76	148	85	72	0	2035	2296	1732	96	110	97	98	89	0	0.384	0.382	0.384	0.407	1.557	0.367	0.895	120	593	2683	3040	-1.382	744	1939	840	2200	0
5	13	5	"CAF17"	"YJR122W"	5200	20330	100	1050	1107	706	56	116	339	78	62	0	1251	1333	913	96	167	440	70	60	0	0.861	0.850	0.922	0.997	1.605	0.803	0.941	80	461	2149	2288	-0.217	994	1155	1051	1237	0
5	14	5	"YJR154W"	"YJR154W"	5410	20330	120	1206	1306	1006	55	99	297	79	64	0	1469	2065	1725	92	147	385	76	66	0	0.836	0.634	0.649	0.723	1.689	0.601	0.935	120	606	2528	3224	-0.259	1151	1377	1251	1973	0
5	15	5	"YKL023W"	"YKL023W"	5610	20320	120	974	1199	930	51	55	19	100	100	0	1344	1873	1623	89	94	24	100	100	0	0.735	0.643	0.675	0.747	1.640	0.585	0.922	120	578	2178	2932	-0.443	923	1255	1148	1784	0
5	16	5	"YJR124C"	"YJR124C"	5800	20330	110	2591	2706	1763	52	80	181	96	91	0	6168	6914	5427	87	154	481	93	83	0	0.418	0.389	0.398	0.467	1.605	0.348	0.940	80	486	8620	9481	-1.260	2539	6081	2654	6827	0
5	17	5	"THI11"	"YJR156C"	6000	20320	130	2675	3625	2953	52	78	172	95	92	0	2501	4192	3625	88	140	412	88	77	0	1.087	0.871	0.868	0.938	1.590	0.832	0.945	120	676	5036	7677	0.120	2623	2413	3573	4104	0
5	18	5	"PAN3"	"YKL025C"	6200	20330	110	4609	4628	3384	53	83	219	93	88	0	4930	5361	4362	90	121	281	90	76	0	0.941	0.868	0.907	1.020	1.481	0.811	0.955	80	533	9396	9846	-0.087	4556	4840	4575	5271	0
5	19	5	"YJR126C"	"YJR126C"	6410	20330	120	2132	2701	2126	52	75	196	91	82	0	1940	2508	2087	89	116	265	79	70	0	1.124	1.095	1.163	1.245	1.510	1.058	0.951	120	576	3931	5068	0.168	2080	1851	2649	2419	0
5	20	5	"HXT16"	"YJR158W"	6610	20320	130	8095	10164	8386	52	58	33	100	100	0	4580	6597	5680	88	93	41	100	100	0	1.791	1.554	1.526	1.587	1.390	1.516	0.973	120	680	12535	16621	0.840	8043	4492	10112	6509	0
5	21	5	"YKL027W"	"YKL027W"	6810	20330	110	2036	2038	1401	54	60	31	100	97	0	2452	2500	1832	88	93	31	100	98	0	0.838	0.823	0.819	0.919	1.457	0.791	0.938	80	562	4346	4396	-0.254	1982	2364	1984	2412	0
5	1	6	"YJR128W"	"YJR128W"	2820	20530	130	931	1062	763	52	56	19	98	96	0	437	456	279	87	91	22	87	87	0	2.511	2.737	2.622	2.949	2.119	2.903	0.869	120	667	1229	1379	1.329	879	350	1010	369	0
5	2	6	"YJR160C"	"YJR160C"	3030	20510	130	509	679	476	52	57	24	97	95	0	427	568	405	89	92	24	94	93	0	1.352	1.309	1.319	1.430	1.733	1.174	0.869	120	515	795	1106	0.435	457	338	627	479	0
5	3	6	"MAE1"	"YKL029C"	3200	20510	140	815	1666	1607	52	60	34	100	99	0	351	548	444	88	93	27	91	86	0	2.901	3.509	3.258	3.353	1.671	3.713	0.901	156	537	1026	2074	1.537	763	263	1614	460	0
5	4	6	"SOF1"	"YLL011W"	3420	20510	140	2729	4073	3488	54	64	56	99	98	0	5690	8678	7186	88	96	48	98	98	0	0.478	0.468	0.431	0.443	1.878	0.463	0.914	156	607	8277	12609	-1.066	2675	5602	4019	8590	0
5	5	6	"FPS1"	"YLL043W"	3610	20530	130	3464	4739	4103	55	63	123	100	94	0	3808	5567	4952	89	94	45	100	99	0	0.917	0.855	0.832	0.883	1.932	0.834	0.906	120	584	7128	10162	-0.126	3409	3719	4684	5478	0
5	6	6	"YLR008C"	"YLR008C"	3820	20530	130	1145	1468	1149	52	58	37	97	94	0	1377	2181	1827	91	93	23	100	97	0	0.850	0.678	0.692	0.745	1.739	0.638	0.895	120	625	2379	3506	-0.235	1093	1286	1416	2090	0
5	7	6	"YLL013C"	"YLL013C"	4030	20510	130	2743	4319	3719	55	79	223	95	91	0	2106	3358	3026	92	116	282	92	85	0	1.335	1.306	1.205	1.312	1.574	1.238	0.893	120	632	4702	7530	0.416	2688	2014	4264	3266	0
5	8	6	"RPL8B"	"YLL045C"	4220	20510	130	2358	3504	2800	55	62	31	100	100	0	1234	1885	1527	91	95	24	99	97	0	2.015	1.923	1.954	2.045	1.564	1.885	0.907	120	599	3446	5243	1.011	2303	1143	3449	1794	0
5	9	6	"YLR010C"	"YLR010C"	4420	20520	120	853	1261	1018	54	62	34	97	92	0	1147	1594	1324	92	101	98	88	82	0	0.757	0.804	0.774	0.875	1.977	0.764	0.892	120	537	1854	2709	-0.401	799	1055	1207	1502	0
5	10	6	"BPT1"	"YLL015W"	4600	20530	100	1230	1441	1073	54	66	50	96	88	0	1638	1628	1243	94	108	113	82	80	0	0.762	0.904	0.882	1.060	1.841	0.864	0.878	80	462	2720	2921	-0.393	1176	1544	1387	1534	0
5	11	6	"YLL047W"	"YLL047W"	4820	20520	110	1991	2406	1784	55	74	107	93	85	0	718	822	603	94	104	57	78	75	0	3.103	3.229	3.104	3.654	1.846	3.137	0.897	80	527	2560	3079	1.633	1936	624	2351	728	0
5	12	6	"YLR012C"	"YLR012C"	5010	20540	120	1125	1466	1173	55	72	102	93	80	0	1926	2803	2413	94	108	135	90	83	0	0.584	0.521	0.524	0.578	1.660	0.480	0.903	120	607	2902	4120	-0.776	1070	1832	1411	2709	0
5	13	6	"YLL017W"	"YLL017W"	5220	20540	120	1782	2043	1466	54	64	56	100	98	0	924	1178	818	93	110	149	84	80	0	2.079	1.833	1.807	1.962	1.694	1.827	0.873	120	535	2559	3074	1.056	1728	831	1989	1085	0
5	14	6	"YLL049W"	"YLL049W"	5430	20550	140	1360	2259	2028	53	60	35	100	99	0	1494	2295	1961	90	98	46	100	93	0	0.931	1.000	0.972	1.052	1.588	1.004	0.915	156	561	2711	4411	-0.103	1307	1404	2206	2205	0
5	15	6	"PPR1"	"YLR014C"	5600	20550	140	1838	3927	3659	54	72	108	100	100	0	2500	4180	3424	91	110	127	100	99	0	0.741	0.947	0.861	0.879	1.618	1.010	0.922	156	654	4193	7962	-0.433	1784	2409	3873	4089	0
5	16	6	"YLR327C"	"YLR327C"	5820	20530	130	1194	1495	1086	53	73	145	90	86	0	921	1151	832	89	115	281	77	65	0	1.371	1.358	1.310	1.532	1.823	1.316	0.881	120	667	1973	2504	0.456	1141	832	1442	1062	0
5	17	6	"ADE13"	"YLR359W"	6000	20530	110	2110	2167	1458	52	72	125	96	90	0	1968	2196	1532	89	104	111	93	86	0	1.095	1.004	0.989	1.091	1.844	1.007	0.908	80	506	3937	4222	0.131	2058	1879	2115	2107	0
5	18	6	"YLR391W"	"YLR391W"	6210	20540	100	1201	1349	930	54	79	137	92	85	0	1303	1314	947	91	108	116	83	76	0	0.946	1.059	1.172	1.269	1.704	1.047	0.899	80	462	2359	2518	-0.080	1147	1212	1295	1223	0
5	19	6	"REC102"	"YLR329W"	6400	20530	130	1193	1833	1498	53	66	71	97	91	0	587	838	634	90	95	30	90	87	0	2.294	2.380	2.352	2.572	1.763	2.445	0.931	120	649	1637	2528	1.198	1140	497	1780	748	0
5	20	6	"YLR361C"	"YLR361C"	6630	20530	110	1474	1510	961	55	70	72	100	96	0	1865	1798	1301	91	97	37	100	96	0	0.800	0.852	0.865	1.042	1.667	0.810	0.906	80	546	3193	3162	-0.322	1419	1774	1455	1707	0
5	21	6	"ATP10"	"YLR393W"	6810	20530	100	1966	2103	1479	53	68	73	97	93	0	1155	1415	1076	90	102	97	88	82	0	1.796	1.547	1.560	1.825	1.694	1.480	0.926	80	490	2978	3375	0.845	1913	1065	2050	1325	0
5	1	7	"YLR331C"	"YLR331C"	2820	20710	150	1167	1920	1601	54	60	31	100	98	0	1118	1651	1351	93	96	25	99	94	0	1.086	1.198	1.198	1.312	1.600	1.176	0.899	156	866	2138	3424	0.119	1113	1025	1866	1558	0
5	2	7	"NMD4"	"YLR363C"	3020	20710	140	502	888	780	53	60	33	98	98	0	597	1123	1036	93	97	27	98	94	0	0.891	0.811	0.819	0.909	1.749	0.770	0.931	156	654	953	1865	-0.167	449	504	835	1030	0
5	3	7	"COX8"	"YLR395C"	3230	20710	140	667	1046	860	54	61	31	98	94	0	1792	2624	2170	89	93	27	99	98	0	0.360	0.391	0.382	0.419	1.642	0.386	0.947	156	579	2316	3527	-1.474	613	1703	992	2535	0
5	4	7	"RPS25B"	"YLR333C"	3420	20710	140	670	1047	866	55	60	30	100	96	0	814	1357	1138	89	93	30	100	96	0	0.848	0.782	0.743	0.814	1.584	0.765	0.922	156	602	1340	2260	-0.237	615	725	992	1268	0
5	5	7	"YLR365W"	"YLR365W"	3620	20720	120	1433	1843	1280	55	60	33	100	98	0	905	1043	723	90	94	31	91	89	0	1.691	1.876	1.907	2.264	1.923	1.864	0.937	120	478	2193	2741	0.758	1378	815	1788	953	0
5	6	7	"AFG2"	"YLR397C"	3820	20720	140	1246	2779	2762	54	59	26	99	99	0	1006	2302	2291	90	94	25	99	96	0	1.301	1.232	1.213	1.371	1.616	1.220	0.966	156	598	2108	4937	0.380	1192	916	2725	2212	0
5	7	7	"YMR097C"	"YMR097C"	4010	20720	130	2052	2388	1910	56	81	214	87	80	0	2780	3943	3324	92	121	248	85	80	0	0.743	0.606	0.602	0.665	1.571	0.606	0.953	120	600	4684	6183	-0.429	1996	2688	2332	3851	0
5	8	7	"ECM16"	"YMR128W"	4210	20720	110	1782	2132	1684	56	102	261	85	77	0	1809	1813	1461	95	153	384	75	61	0	1.007	1.208	1.224	1.442	1.978	1.177	0.826	80	480	3440	3794	0.010	1726	1714	2076	1718	0
5	9	7	"YMR158W"	"YMR158W"	4410	20720	120	1229	1661	1377	54	73	105	92	85	0	1163	1654	1400	92	110	115	88	80	0	1.097	1.029	1.053	1.178	1.712	1.005	0.960	120	605	2246	3169	0.134	1175	1071	1607	1562	0
5	10	7	"YMR099C"	"YMR099C"	4620	20720	120	1612	1857	1408	54	63	38	100	97	0	1034	1230	903	91	100	64	90	88	0	1.652	1.583	1.584	1.773	1.763	1.609	0.947	120	591	2501	2942	0.724	1558	943	1803	1139	0
5	11	7	"YMR130W"	"YMR130W"	4800	20730	110	1102	1116	813	54	107	358	76	62	0	1783	1639	1194	94	170	560	68	60	0	0.620	0.687	0.725	0.825	1.729	0.659	0.919	80	545	2737	2607	-0.689	1048	1689	1062	1545	0
5	12	7	"APG16"	"YMR159C"	5020	20740	120	1175	1604	1243	54	109	355	79	66	0	697	949	736	92	166	545	51	35	0	1.853	1.809	1.885	2.226	1.924	1.798	0.936	120	582	1726	2407	0.890	1121	605	1550	857	0
5	13	7	"SRT1"	"YMR101C"	5220	20710	140	968	1411	1252	52	61	47	97	92	0	1326	2784	2609	87	100	128	96	87	0	0.739	0.504	0.501	0.522	1.550	0.477	0.926	156	643	2155	4056	-0.436	916	1239	1359	2697	0
5	14	7	"YMR132C"	"YMR132C"	5420	20720	130	1408	1628	1264	53	58	25	100	99	0	1282	1504	1197	90	94	30	97	94	0	1.137	1.114	1.133	1.249	1.551	1.090	0.957	120	522	2547	2989	0.185	1355	1192	1575	1414	0
5	15	7	"HLJ1"	"YMR161W"	5600	20730	100	924	1135	1092	54	72	80	85	75	0	1390	1390	1177	93	125	168	73	68	0	0.671	0.833	0.779	0.943	1.964	0.862	0.851	80	401	2167	2378	-0.576	870	1297	1081	1297	0
5	16	7	"YMR103C"	"YMR103C"	5820	20730	110	486	534	422	51	68	72	85	76	0	295	436	422	90	114	147	61	41	0	2.122	1.396	1.470	1.642	1.978	1.190	0.878	80	529	640	829	1.085	435	205	483	346	0
5	17	7	"YMR134W"	"YMR134W"	6010	20720	120	2335	2640	2055	52	66	94	98	93	0	2797	3872	3197	89	104	121	97	90	0	0.843	0.684	0.703	0.749	1.492	0.667	0.952	120	586	4991	6371	-0.246	2283	2708	2588	3783	0
5	18	7	"YMR163C"	"YMR163C"	6210	20720	130	1688	2326	1927	54	66	68	98	93	0	1042	1403	1142	89	100	94	85	80	0	1.715	1.729	1.754	2.035	1.952	1.735	0.941	120	658	2587	3586	0.778	1634	953	2272	1314	0
5	19	7	"YNL144C"	"YNL144C"	6420	20710	130	4350	6177	4864	56	69	65	100	100	0	3008	4180	3265	90	98	56	100	99	0	1.472	1.497	1.454	1.489	1.383	1.485	0.965	120	636	7212	10211	0.557	4294	2918	6121	4090	0
5	20	7	"YNL176C"	"YNL176C"	6620	20730	120	10872	10615	7284	54	63	42	100	100	0	3626	4040	2870	89	96	44	100	100	0	3.059	2.673	2.653	2.735	1.378	2.648	0.968	120	600	14355	14512	1.613	10818	3537	10561	3951	0
5	21	7	"YNL208W"	"YNL208W"	6830	20730	120	2144	2194	1369	53	61	36	100	98	0	2453	2437	1576	89	95	33	100	96	0	0.885	0.912	0.927	0.974	1.445	0.894	0.957	120	641	4455	4489	-0.177	2091	2364	2141	2348	0
5	1	8	"YNL146W"	"YNL146W"	2820	20950	150	769	1044	766	53	57	20	99	98	0	701	824	513	97	100	23	94	90	0	1.185	1.363	1.265	1.406	1.875	1.456	0.923	156	797	1320	1718	0.245	716	604	991	727	0
5	2	8	"RPS3"	"YNL178W"	3030	20950	140	1010	1462	1214	53	58	22	99	98	0	1149	1457	1023	95	98	24	98	94	0	0.908	1.035	1.021	1.020	1.712	1.109	0.915	156	534	2011	2771	-0.139	957	1054	1409	1362	0
5	3	8	"MER1"	"YNL210W"	3220	20910	140	860	1575	1375	53	58	20	100	99	0	738	1114	905	90	93	24	99	95	0	1.245	1.486	1.455	1.477	1.746	1.532	0.907	156	582	1455	2546	0.317	807	648	1522	1024	0
5	4	8	"ALF1"	"YNL148C"	3430	20920	120	930	1123	840	53	57	27	100	95	0	523	732	558	91	93	23	91	90	0	2.030	1.669	1.623	1.800	1.923	1.629	0.883	120	505	1309	1711	1.022	877	432	1070	641	0
5	5	8	"RHO5"	"YNL180C"	3630	20910	140	1454	2686	2624	53	62	44	99	98	0	1460	2577	2491	91	97	35	99	96	0	1.023	1.059	1.061	1.113	1.569	1.050	0.937	156	616	2770	5119	0.033	1401	1369	2633	2486	0
5	6	8	"YNL212W"	"YNL212W"	3820	20910	120	588	783	716	54	61	30	99	89	0	587	890	810	92	96	29	90	85	0	1.079	0.914	0.900	1.015	2.184	0.886	0.894	120	507	1029	1527	0.109	534	495	729	798	0
5	7	8	"YNL150W"	"YNL150W"	4020	20910	130	1944	2004	1513	54	79	150	87	80	0	1172	1215	907	92	118	190	76	69	0	1.750	1.736	1.772	2.101	2.008	1.700	0.913	120	623	2970	3073	0.807	1890	1080	1950	1123	0
5	8	8	"YNL182C"	"YNL182C"	4220	20900	150	1868	2962	2681	56	96	210	91	83	0	1213	1597	1315	96	140	311	78	68	0	1.622	1.936	1.852	1.973	1.730	2.015	0.879	156	762	2929	4407	0.698	1812	1117	2906	1501	0
5	9	8	"PEX17"	"YNL214W"	4440	20930	120	2365	2898	2171	53	66	83	97	91	0	2457	2637	1932	93	103	79	95	85	0	0.978	1.118	1.132	1.202	1.765	1.134	0.924	120	548	4676	5389	-0.032	2312	2364	2845	2544	0
5	10	8	"MSB4"	"YOL112W"	4620	20920	110	1892	1754	1235	54	138	582	73	63	0	2045	1827	1285	90	150	431	75	66	0	0.940	0.979	0.998	1.155	1.900	1.059	0.880	80	476	3793	3437	-0.089	1838	1955	1700	1737	0
5	11	8	"NOP8"	"YOL144W"	4810	20930	100	3305	3176	2293	55	168	611	75	71	0	2434	2219	1640	91	171	452	72	65	0	1.387	1.467	1.463	1.914	2.154	1.484	0.894	80	467	5593	5249	0.472	3250	2343	3121	2128	0
5	12	8	"TIR2"	"YOR010C"	5000	20920	110	1050	1168	896	54	105	212	80	68	0	1307	1425	1158	90	141	215	71	68	0	0.818	0.834	0.827	1.212	2.557	0.786	0.853	80	503	2213	2449	-0.289	996	1217	1114	1335	0
5	13	8	"YOL114C"	"YOL114C"	5210	20940	130	1317	1294	863	53	78	117	94	82	0	1048	1167	806	89	116	136	87	77	0	1.318	1.151	1.116	1.268	1.794	1.116	0.898	120	643	2223	2319	0.398	1264	959	1241	1078	0
5	14	8	"YOL146W"	"YOL146W"	5420	20950	140	506	1149	1098	54	65	79	92	85	0	700	1424	1388	92	100	74	89	83	0	0.743	0.822	0.778	0.913	1.866	0.800	0.919	156	681	1060	2427	-0.428	452	608	1095	1332	0
5	15	8	"YOR012W"	"YOR012W"	5630	20910	130	628	1015	808	53	69	91	90	86	0	474	740	572	92	112	122	82	71	0	1.505	1.485	1.465	1.588	1.806	1.447	0.922	120	597	957	1610	0.590	575	382	962	648	0
5	16	8	"MSN1"	"YOL116W"	5820	20940	140	633	1207	1187	51	62	60	93	85	0	604	1231	1250	91	108	167	77	60	0	1.135	1.014	1.003	1.091	1.907	0.964	0.878	156	674	1095	2296	0.182	582	513	1156	1140	0
5	17	8	"SPT20"	"YOL148C"	6030	20930	130	1074	1273	1012	53	62	61	94	89	0	914	1080	879	92	106	147	79	73	0	1.242	1.235	1.271	1.420	2.050	1.251	0.841	120	630	1843	2208	0.313	1021	822	1220	988	0
5	18	8	"RTS1"	"YOR014W"	6210	20930	110	1220	1083	773	57	82	126	75	70	0	1197	1090	851	91	115	154	67	65	0	1.052	1.027	1.049	1.560	2.858	0.946	0.884	80	472	2269	2025	0.072	1163	1106	1026	999	0
5	19	8	"YOL118C"	"YOL118C"	6400	20920	110	882	960	612	58	110	197	86	72	0	379	377	199	92	125	159	70	42	0	2.871	3.165	3.301	3.345	1.854	2.816	0.661	80	529	1111	1187	1.522	824	287	902	285	0
5	20	8	"YOL150C"	"YOL150C"	6600	20920	110	516	483	328	57	102	173	65	52	0	429	455	293	90	115	92	71	66	0	1.354	1.167	1.204	1.389	2.272	1.103	0.852	80	523	798	791	0.437	459	339	426	365	0
5	21	8	"ERP4"	"YOR016C"	6810	20920	110	4102	3882	2806	56	109	342	80	76	0	4936	4272	3057	92	135	275	81	75	0	0.835	0.915	0.916	0.954	1.601	0.934	0.933	80	558	8890	8006	-0.260	4046	4844	3826	4180	0
5	1	9	"SCD5"	"YOR329C"	2810	21140	160	1449	2678	2696	53	57	22	98	97	0	3075	5616	5754	94	97	22	99	99	0	0.468	0.475	0.464	0.478	1.644	0.464	0.957	208	834	4377	8147	-1.094	1396	2981	2625	5522	0
5	2	9	"PRT1"	"YOR361C"	3020	21110	140	1311	1964	1700	53	58	22	100	99	0	1418	2029	1767	93	97	23	98	97	0	0.949	0.987	0.983	1.046	1.595	0.971	0.937	156	458	2583	3847	-0.075	1258	1325	1911	1936	0
5	3	9	"ERR1"	"YOR393W"	3210	21110	140	2145	3624	3079	53	61	45	100	100	0	2476	3627	2925	92	103	111	98	92	0	0.878	1.010	0.967	1.031	1.519	1.031	0.935	156	572	4476	7106	-0.189	2092	2384	3571	3535	0
5	4	9	"YOR331C"	"YOR331C"	3420	21110	140	1500	2105	1769	53	61	44	99	95	0	830	1035	796	92	103	103	86	75	0	1.961	2.176	2.183	2.375	1.708	2.234	0.938	156	672	2185	2995	0.971	1447	738	2052	943	0
5	5	9	"PIP2"	"YOR363C"	3600	21110	130	1105	1591	1423	53	65	55	99	91	0	915	1465	1257	92	102	48	90	85	0	1.278	1.120	1.130	1.235	1.584	1.110	0.942	120	602	1875	2911	0.354	1052	823	1538	1373	0
5	6	9	"HAT1"	"YPL001W"	3810	21120	120	571	782	642	54	66	54	90	85	0	1761	2611	2388	92	105	64	95	86	0	0.310	0.289	0.296	0.349	1.779	0.269	0.934	120	573	2186	3247	-1.691	517	1669	728	2519	0
5	7	9	"YOR333C"	"YOR333C"	4000	21140	130	1568	2229	1781	56	87	192	90	83	0	1002	1411	1071	92	120	153	85	75	0	1.662	1.647	1.625	1.802	1.767	1.669	0.950	120	563	2422	3492	0.733	1512	910	2173	1319	0
5	8	9	"YOR365C"	"YOR365C"	4220	21120	120	2159	3039	2492	56	94	204	92	82	0	1126	1617	1372	96	124	155	81	73	0	2.042	1.961	2.053	2.264	1.600	1.927	0.934	120	568	3133	4504	1.030	2103	1030	2983	1521	0
5	9	9	"ULA1"	"YPL003W"	4420	21110	130	1532	2451	2108	54	69	80	95	90	0	3012	4032	3339	94	112	141	95	85	0	0.507	0.609	0.578	0.620	1.470	0.612	0.962	120	566	4396	6335	-0.981	1478	2918	2397	3938	0
5	10	9	"ALA1"	"YOR335C"	4610	21110	130	3035	4450	3565	53	91	251	91	85	0	2071	2821	2218	90	127	233	84	80	0	1.505	1.610	1.551	1.655	1.482	1.608	0.943	120	665	4963	7128	0.590	2982	1981	4397	2731	0
5	11	9	"SCP1"	"YOR367W"	4820	21120	120	1737	1851	1295	52	71	104	93	87	0	1218	1398	937	88	108	133	85	80	0	1.491	1.373	1.383	1.456	1.575	1.377	0.910	120	562	2815	3109	0.576	1685	1130	1799	1310	0
5	12	9	"YPL005W"	"YPL005W"	5020	21120	120	545	698	578	52	62	75	81	71	0	1174	1710	1578	89	106	127	84	72	0	0.454	0.399	0.422	0.447	1.830	0.363	0.900	120	561	1578	2267	-1.138	493	1085	646	1621	0
5	13	9	"VMA13"	"YPR036W"	5220	21120	130	1965	2556	2064	53	64	69	100	96	0	854	1103	872	92	101	53	90	85	0	2.509	2.476	2.548	2.826	1.715	2.463	0.956	120	569	2674	3514	1.327	1912	762	2503	1011	0
5	14	9	"HOS1"	"YPR068C"	5430	21120	130	3559	4214	3400	53	63	67	100	99	0	4207	5493	4569	92	98	47	100	100	0	0.852	0.770	0.766	0.805	1.405	0.752	0.962	120	572	7621	9562	-0.231	3506	4115	4161	5401	0
5	15	9	"YPR100W"	"YPR100W"	5620	21120	120	2500	2779	2184	53	61	40	100	100	0	1369	1714	1422	90	96	42	97	92	0	1.913	1.679	1.722	1.827	1.565	1.632	0.939	120	524	3726	4350	0.936	2447	1279	2726	1624	0
5	16	9	"YPR038W"	"YPR038W"	5810	21120	120	2306	2529	1848	53	68	86	94	89	0	1641	1829	1371	90	111	157	84	76	0	1.453	1.424	1.442	1.557	1.660	1.399	0.928	120	516	3804	4215	0.539	2253	1551	2476	1739	0
5	17	9	"MED1"	"YPR070W"	6010	21140	120	1970	2812	2147	54	72	93	99	95	0	1655	2162	1662	92	120	193	91	82	0	1.226	1.332	1.314	1.436	1.614	1.316	0.946	120	585	3479	4828	0.294	1916	1563	2758	2070	0
5	18	9	"RPL11A"	"YPR102C"	6210	21110	130	1175	1895	1681	56	91	155	83	73	0	1192	1732	1543	91	124	145	75	70	0	1.016	1.121	1.114	1.286	1.745	1.104	0.953	120	618	2220	3480	0.023	1119	1101	1839	1641	0
5	19	9	"YPR040W"	"YPR040W"	6410	21120	140	1741	3341	3218	57	113	234	92	78	0	1438	2303	2184	93	136	173	84	75	0	1.252	1.486	1.482	1.600	1.615	1.493	0.951	156	728	3029	5494	0.324	1684	1345	3284	2210	0
5	20	9	"NOT5"	"YPR072W"	6610	21110	130	1963	2445	1933	57	89	176	89	84	0	2424	3303	2689	94	126	148	94	88	0	0.818	0.744	0.737	0.785	1.463	0.733	0.948	120	649	4236	5597	-0.290	1906	2330	2388	3209	0
5	21	9	"FHL1"	"YPR104C"	6820	21120	120	2220	2768	2341	55	83	181	86	76	0	2097	3848	3457	94	129	224	85	76	0	1.081	0.723	0.703	0.779	1.565	0.692	0.946	120	662	4168	6467	0.112	2165	2003	2713	3754	0
5	1	10	"YPR042C"	"YPR042C"	2830	21320	130	179	290	404	53	58	20	94	81	0	297	440	414	92	96	33	88	83	0	0.615	0.681	0.579	0.619	1.878	0.859	0.624	120	533	331	585	-0.702	126	205	237	348	0
5	2	10	"TKL1"	"YPR074C"	3020	21310	150	945	1477	1210	54	66	62	98	95	0	860	1279	1007	94	106	76	92	89	0	1.163	1.201	1.176	1.271	1.566	1.197	0.964	156	528	1657	2608	0.218	891	766	1423	1185	0
5	3	10	"ISR1"	"YPR106W"	3210	21340	140	1421	2125	1871	55	76	100	96	92	0	711	974	783	94	118	127	83	72	0	2.214	2.352	2.359	2.497	1.586	2.416	0.948	156	651	1983	2950	1.147	1366	617	2070	880	0
5	4	10	"EMPTY"	"EMPTY"	3420	21330	100	302	452	409	56	73	85	81	61	0	217	354	336	96	107	67	70	48	0	2.033	1.535	1.717	1.876	1.788	1.331	0.892	80	486	367	654	1.024	246	121	396	258	0
5	5	10	"EMPTY"	"EMPTY"	3640	21330	100	148	198	172	53	61	29	78	68	0	153	186	146	93	99	41	57	37	0	1.583	1.559	1.280	1.365	2.040	1.159	0.710	80	531	155	238	0.663	95	60	145	93	0
5	6	10	"EMPTY"	"EMPTY"	3850	21300	110	87	111	91	54	60	26	52	36	0	105	126	83	90	101	62	22	8	0	2.200	1.583	1.053	0.945	2.808	1.106	0.663	80	445	48	93	1.138	33	15	57	36	0
5	7	10	"EMPTY"	"EMPTY"	4010	21310	150	74	151	248	55	83	178	12	5	0	110	173	266	92	127	302	6	3	0	1.056	1.185	0.900	0.825	3.032	0.917	0.677	156	648	37	177	0.078	19	18	96	81	-50
5	8	10	"EMPTY"	"EMPTY"	4210	21310	150	66	90	67	55	74	136	7	0	0	100	118	80	93	108	108	6	1	0	1.571	1.400	0.764	0.708	3.369	0.667	0.410	156	697	18	60	0.652	11	7	35	25	-50
5	9	10	"EMPTY"	"EMPTY"	4410	21320	150	66	98	117	53	66	76	15	7	0	102	120	97	92	108	125	5	1	0	1.300	1.607	1.033	0.904	4.196	1.199	0.729	156	822	23	73	0.379	13	10	45	28	-50
5	10	10	"EMPTY"	"EMPTY"	4640	21330	80	105	128	92	53	55	18	73	63	0	116	136	83	89	90	20	53	44	0	1.926	1.596	1.091	1.045	2.626	1.173	0.625	52	299	79	122	0.946	52	27	75	47	0
5	11	10	"EMPTY"	"EMPTY"	4810	21320	150	65	126	219	52	66	90	15	7	0	102	150	238	90	104	89	8	6	0	1.083	1.233	0.863	0.925	3.419	0.928	0.690	156	736	25	134	0.115	13	12	74	60	-50
5	12	10	"EMPTY"	"EMPTY"	5010	21320	150	64	89	102	51	65	109	7	2	0	97	108	60	91	103	87	5	1	0	2.167	2.235	0.862	0.880	3.931	1.692	0.588	156	694	19	55	1.115	13	6	38	17	-50
5	13	10	"EMPTY"	"EMPTY"	5210	21320	150	68	157	362	53	68	116	14	8	0	97	165	327	91	104	90	12	5	0	2.500	1.405	1.085	0.916	3.433	1.123	0.820	156	782	21	178	1.322	15	6	104	74	-50
5	14	10	"EMPTY"	"EMPTY"	5430	21330	100	120	452	849	53	60	30	76	55	0	129	450	863	90	95	27	60	42	0	1.718	1.108	1.323	1.359	2.947	0.999	0.838	80	432	106	759	0.781	67	39	399	360	0
5	15	10	"EMPTY"	"EMPTY"	5610	21320	150	67	81	67	55	71	91	5	2	0	95	101	52	92	112	139	1	0	0	4.000	2.889	0.923	0.839	3.311	1.116	0.399	156	773	15	35	2.000	12	3	26	9	-50
5	16	10	"iYAL056W"	"iYAL056W"	5830	21320	110	1390	1745	1337	55	89	240	76	73	0	5540	6866	5734	92	225	1105	71	66	0	0.245	0.249	0.249	0.278	1.496	0.235	0.959	80	530	6783	8464	-2.029	1335	5448	1690	6774	0
5	17	10	"iYAL051W"	"iYAL051W"	6020	21330	100	278	279	172	56	99	261	42	5	0	592	744	583	95	275	1197	22	0	0	0.447	0.344	0.341	0.436	2.398	0.312	0.747	80	458	719	872	-1.163	222	497	223	649	0
5	18	10	"iYAL046C"	"iYAL046C"	6210	21320	110	351	366	230	54	69	62	80	73	0	355	403	288	91	124	161	61	43	0	1.125	1.000	0.949	1.115	2.445	0.875	0.812	80	543	561	624	0.170	297	264	312	312	0
5	19	10	"iYAL031C"	"iYAL031C"	6410	21330	120	1051	1364	1107	55	89	174	81	73	0	643	940	785	95	122	136	72	64	0	1.818	1.549	1.611	2.011	1.807	1.480	0.949	120	612	1544	2154	0.862	996	548	1309	845	0
5	20	10	"iYAL027W"	"iYAL027W"	6630	21330	120	645	710	498	53	84	170	81	62	0	1069	1535	1299	94	121	137	90	80	0	0.607	0.456	0.468	0.578	1.818	0.412	0.923	120	620	1567	2098	-0.720	592	975	657	1441	0
5	21	10	"iYAL023C"	"iYAL023C"	6830	21330	120	875	988	740	52	58	34	96	93	0	691	826	619	90	105	159	72	61	0	1.369	1.272	1.284	1.495	1.880	1.176	0.849	120	620	1424	1672	0.454	823	601	936	736	0
5	1	11	"iYAL007C"	"iYAL007C"	2840	21510	150	626	929	747	54	57	17	99	97	0	1484	2176	1875	92	95	31	99	98	0	0.411	0.420	0.420	0.468	1.589	0.399	0.935	156	714	1964	2959	-1.283	572	1392	875	2084	0
5	2	11	"iYAL003W"	"iYAL003W"	3010	21510	140	634	1278	1219	55	78	116	92	84	0	806	1396	1297	93	113	114	89	83	0	0.812	0.939	0.890	1.038	1.876	0.937	0.927	156	559	1292	2526	-0.300	579	713	1223	1303	0
5	3	11	"iYAR002W"	"iYAR002W"	3230	21520	120	643	709	498	55	77	118	89	71	0	1239	1865	1562	95	120	149	85	79	0	0.514	0.369	0.382	0.465	2.036	0.320	0.842	120	523	1732	2424	-0.960	588	1144	654	1770	0
5	4	11	"itL(CAA)A"	"itL(CAA)A"	3430	21520	120	1084	1254	871	57	65	40	97	92	0	1207	1481	1142	95	116	177	82	75	0	0.924	0.864	0.927	1.056	1.790	0.799	0.889	120	584	2139	2583	-0.115	1027	1112	1197	1386	0
5	5	11	"iYAR028W"	"iYAR028W"	3630	21520	110	1383	1421	950	55	66	51	97	90	0	1903	1950	1372	93	115	170	78	76	0	0.734	0.736	0.749	0.840	1.655	0.679	0.887	80	528	3138	3223	-0.447	1328	1810	1366	1857	0
5	6	11	"iYAR035W"	"iYAR035W"	3840	21520	120	721	915	649	55	68	69	89	85	0	857	1029	776	91	117	278	75	57	0	0.869	0.917	0.920	1.072	2.039	0.872	0.911	120	651	1432	1798	-0.202	666	766	860	938	0
5	7	11	"iYBR162C"	"iYBR162C"	4020	21520	100	1891	1533	1058	55	89	183	83	72	0	1043	844	609	92	125	334	62	53	0	1.931	1.965	2.023	2.658	2.178	1.619	0.591	80	448	2787	2230	0.949	1836	951	1478	752	0
5	8	11	"iYBR165W"	"iYBR165W"	4220	21520	110	323	311	190	54	84	160	62	42	0	540	519	358	93	112	96	70	58	0	0.602	0.603	0.605	0.731	2.238	0.595	0.776	80	555	716	683	-0.733	269	447	257	426	0
5	9	11	"iYBR169C"	"iYBR169C"	4420	21520	110	830	949	716	52	80	114	76	72	0	661	732	562	91	114	101	71	67	0	1.365	1.399	1.400	1.861	2.349	1.341	0.928	80	540	1348	1538	0.449	778	570	897	641	0
5	10	11	"iYBR187W"	"iYBR187W"	4630	21520	120	544	683	525	53	77	118	78	69	0	707	1077	922	90	110	107	80	72	0	0.796	0.638	0.660	0.760	2.015	0.590	0.890	120	651	1108	1617	-0.330	491	617	630	987	0
5	11	11	"iYBR192W"	"iYBR192W"	4830	21520	110	402	574	462	53	67	72	82	70	0	529	1031	1007	93	109	96	77	67	0	0.800	0.555	0.588	0.725	1.887	0.476	0.864	80	528	785	1459	-0.321	349	436	521	938	0
5	12	11	"iYBR196C"	"iYBR196C"	5020	21520	110	1071	1427	1136	53	91	191	83	71	0	654	963	790	94	122	135	76	66	0	1.818	1.581	1.568	2.155	2.382	1.497	0.937	80	532	1578	2243	0.862	1018	560	1374	869	0
5	13	11	"iYBRCdelta19"	"iYBRCdelta19"	5220	21520	110	1179	1398	1153	55	109	235	71	62	0	698	834	666	95	131	165	63	60	0	1.864	1.817	1.823	2.026	1.776	1.753	0.920	80	540	1727	2082	0.898	1124	603	1343	739	0
5	14	11	"iYBR212W"	"iYBR212W"	5430	21520	120	958	1177	947	55	81	142	85	72	0	815	1148	966	93	111	111	80	71	0	1.251	1.064	1.057	1.255	2.020	1.016	0.925	120	609	1625	2177	0.323	903	722	1122	1055	0
5	15	11	"iYBR216C"	"iYBR216C"	5610	21520	110	898	875	640	56	88	132	75	67	0	1138	1132	867	95	137	201	67	62	0	0.807	0.790	0.852	1.036	2.018	0.803	0.836	80	529	1885	1856	-0.309	842	1043	819	1037	0
5	16	11	"iYBR237W"	"iYBR237W"	5850	21520	130	1621	2040	1574	57	101	231	83	72	0	2853	3141	2461	95	202	885	69	62	0	0.567	0.651	0.634	0.675	1.471	0.631	0.938	120	699	4322	5029	-0.818	1564	2758	1983	3046	0
5	17	11	"iYBR241C"	"iYBR241C"	6010	21520	110	578	754	565	55	90	136	73	70	0	739	895	712	93	135	163	70	63	0	0.810	0.872	0.911	1.199	2.285	0.822	0.863	80	502	1169	1501	-0.305	523	646	699	802	0
5	18	11	"iYBR246W"	"iYBR246W"	6230	21520	100	751	684	503	55	97	153	70	60	0	873	996	757	92	146	184	67	58	0	0.891	0.696	0.711	0.757	2.071	0.675	0.921	80	523	1477	1533	-0.166	696	781	629	904	0
5	19	11	"iYDL140C"	"iYDL140C"	6430	21520	110	893	832	567	55	80	103	82	72	0	362	369	244	95	122	122	63	51	0	3.139	2.836	2.675	2.932	1.636	2.631	0.863	80	534	1105	1051	1.650	838	267	777	274	0
5	20	11	"iYDL136W"	"iYDL136W"	6620	21520	110	684	741	554	52	74	84	81	72	0	803	956	763	90	111	93	76	70	0	0.886	0.796	0.827	1.014	2.203	0.745	0.922	80	548	1345	1555	-0.174	632	713	689	866	0
5	21	11	"iYDL133W"	"iYDL133W"	6840	21520	110	267	337	253	50	65	63	80	63	0	249	316	246	88	110	165	48	30	0	1.348	1.259	1.225	1.412	2.333	1.131	0.871	80	567	378	515	0.431	217	161	287	228	0
5	1	12	"iYDL117W"	"iYDL117W"	2830	21710	140	310	402	293	53	56	17	94	91	0	336	427	290	90	101	197	59	34	0	1.045	1.036	0.971	1.028	2.086	1.025	0.860	156	756	503	686	0.063	257	246	349	337	0
5	2	12	"iYDL113C"	"iYDL113C"	3020	21720	130	463	686	584	55	69	81	88	78	0	348	449	318	90	111	240	54	33	0	1.581	1.758	1.589	1.699	2.041	1.888	0.752	120	555	666	990	0.661	408	258	631	359	0
5	3	12	"iYDL109C"	"iYDL109C"	3230	21720	120	609	753	591	54	62	40	95	85	0	375	464	348	91	96	31	83	74	0	1.954	1.874	1.822	2.063	2.077	1.709	0.815	120	554	839	1072	0.967	555	284	699	373	0
5	4	12	"iYDL090C"	"iYDL090C"	3440	21720	120	1109	1232	930	55	60	27	100	98	0	765	893	621	92	96	28	96	92	0	1.566	1.469	1.480	1.551	1.681	1.532	0.833	120	565	1727	1978	0.647	1054	673	1177	801	0
5	5	12	"iYDL086W"	"iYDL086W"	3640	21730	150	924	1138	737	55	63	43	98	96	0	461	527	311	93	104	71	83	78	0	2.361	2.495	2.428	2.617	1.797	2.568	0.875	156	707	1237	1517	1.240	869	368	1083	434	0
5	6	12	"iYDL082W"	"iYDL082W"	3790	21720	110	436	428	292	55	77	86	72	65	0	1115	1132	862	96	137	186	70	63	0	0.374	0.360	0.357	0.442	2.829	0.340	0.848	80	448	1400	1409	-1.419	381	1019	373	1036	0
5	7	12	"iYDL065C"	"iYDL065C"	4020	21720	130	386	433	256	53	73	86	83	74	0	516	566	342	90	122	154	76	60	0	0.782	0.798	0.799	0.814	1.808	0.354	0.645	120	686	759	856	-0.355	333	426	380	476	0
5	8	12	"iYDL060W"	"iYDL060W"	4200	21720	110	650	652	394	51	66	67	95	85	0	557	532	332	89	98	46	82	76	0	1.280	1.357	1.345	1.647	2.137	1.294	0.856	80	525	1067	1044	0.356	599	468	601	443	0
5	9	12	"iYDL056W"	"iYDL056W"	4400	21720	110	443	417	237	50	67	70	91	77	0	1335	1173	794	90	108	90	88	82	0	0.316	0.339	0.317	0.393	2.215	0.302	0.780	80	556	1638	1450	-1.664	393	1245	367	1083	0
5	10	12	"iYDRWdelta12"	"iYDRWdelta12"	4600	21720	110	1031	948	678	52	85	166	77	68	0	622	565	392	91	115	111	72	62	0	1.844	1.890	1.811	2.277	2.380	1.920	0.885	80	565	1510	1370	0.883	979	531	896	474	0
5	11	12	"iYDR244W"	"iYDR244W"	4810	21730	100	576	545	298	54	93	179	80	66	0	426	397	222	93	121	214	66	32	0	1.568	1.615	1.591	1.732	1.693	0.870	0.312	80	505	855	795	0.649	522	333	491	304	0
5	12	12	"iYDR248C"	"iYDR248C"	5000	21720	110	733	709	480	56	82	115	81	70	0	648	746	553	97	127	218	63	53	0	1.229	1.006	0.994	1.284	2.287	0.882	0.863	80	532	1228	1302	0.297	677	551	653	649	0
5	13	12	"itG(GCC)D2"	"itG(GCC)D2"	5200	21720	100	900	895	615	55	85	116	81	71	0	1130	962	668	97	123	113	78	71	0	0.818	0.971	0.984	1.090	2.083	0.948	0.898	80	507	1878	1705	-0.290	845	1033	840	865	0
5	14	12	"iYDR265W"	"iYDR265W"	5400	21720	110	692	644	403	56	81	92	81	77	0	833	732	469	96	119	91	77	70	0	0.863	0.925	0.976	1.119	2.119	0.897	0.872	80	546	1373	1224	-0.213	636	737	588	636	0
5	15	12	"iYDR271C"	"iYDR271C"	5600	21730	100	1005	890	504	57	86	102	86	81	0	1029	889	518	93	123	111	81	77	0	1.013	1.046	1.050	1.230	1.983	1.008	0.904	80	507	1884	1629	0.018	948	936	833	796	0
5	16	12	"iYDR286C"	"iYDR286C"	5800	21720	110	1701	1505	1036	57	93	162	81	75	0	1452	1438	990	94	127	157	77	72	0	1.211	1.077	1.087	1.255	1.987	1.055	0.904	80	563	3002	2792	0.276	1644	1358	1448	1344	0
5	17	12	"iYDR292C"	"iYDR292C"	6010	21720	110	607	655	432	52	83	157	83	72	0	841	895	585	91	124	174	81	70	0	0.740	0.750	0.746	0.892	2.242	0.680	0.807	80	566	1305	1407	-0.434	555	750	603	804	0
5	18	12	"iYDR296W"	"iYDR296W"	6200	21720	110	1495	1301	865	54	81	127	87	78	0	704	694	447	91	115	124	75	73	0	2.351	2.068	2.050	2.296	1.937	2.069	0.858	80	562	2054	1850	1.233	1441	613	1247	603	0
5	19	12	"iYDR311W"	"iYDR311W"	6400	21720	110	986	950	672	57	101	176	71	67	0	719	745	557	93	117	93	70	66	0	1.484	1.370	1.398	1.609	1.822	1.343	0.878	80	570	1555	1545	0.570	929	626	893	652	0
5	20	12	"iYDR315C"	"iYDR315C"	6600	21720	110	810	734	482	55	88	143	80	71	0	521	464	290	91	109	81	75	67	0	1.756	1.820	1.875	1.900	1.692	1.817	0.827	80	568	1185	1052	0.812	755	430	679	373	0
5	21	12	"iYDR317W"	"iYDR317W"	6810	21740	120	708	807	629	52	76	108	80	68	0	838	1012	796	87	108	117	78	70	0	0.874	0.816	0.825	0.940	2.183	0.812	0.885	120	678	1407	1680	-0.195	656	751	755	925	0
5	1	13	"itK(CUU)E1"	"itK(CUU)E1"	2850	21910	90	130	277	357	51	56	19	82	75	0	161	311	388	95	115	292	19	11	0	1.197	1.046	0.863	1.117	2.808	0.206	0.122	52	340	145	442	0.259	79	66	226	216	0
5	2	13	"iYELWdelta6"	"iYELWdelta6"	3010	21910	140	218	273	178	53	60	35	88	79	0	359	462	332	92	106	211	57	33	0	0.618	0.595	0.577	0.673	2.651	0.305	0.442	156	665	432	590	-0.694	165	267	220	370	0
5	3	13	"iYEL007W"	"iYEL007W"	3220	21900	130	904	1141	841	52	64	82	90	86	0	1319	1746	1334	91	106	123	87	81	0	0.694	0.658	0.642	0.737	1.861	0.633	0.924	120	619	2080	2744	-0.527	852	1228	1089	1655	0
5	4	13	"isnR14"	"isnR14"	3410	21910	110	200	292	271	55	72	92	63	38	0	293	464	474	92	116	140	63	36	0	0.721	0.637	0.576	0.657	2.395	0.576	0.796	80	530	346	609	-0.471	145	201	237	372	0
5	5	13	"iYER010C-1"	"iYER010C-1"	3620	21920	120	831	1333	1152	55	66	44	98	94	0	602	809	683	93	108	98	75	63	0	1.525	1.785	1.644	1.850	2.154	1.774	0.906	120	574	1285	1994	0.608	776	509	1278	716	0
5	6	13	"iYER012W"	"iYER012W"	3820	21910	120	334	457	343	53	65	54	87	73	0	238	324	227	94	109	89	60	47	0	1.951	1.757	1.719	1.987	2.292	1.658	0.865	120	590	425	634	0.965	281	144	404	230	0
5	7	13	"iYER027C"	"iYER027C"	4020	21920	120	1099	1204	833	52	59	79	92	90	0	631	711	508	88	94	50	86	78	0	1.928	1.849	1.938	2.336	2.161	1.795	0.870	120	545	1590	1775	0.947	1047	543	1152	623	0
5	8	13	"iYER031C"	"iYER031C"	4210	21930	120	831	1033	795	51	65	104	90	78	0	660	831	628	87	99	75	87	79	0	1.361	1.320	1.273	1.581	2.582	1.321	0.877	120	593	1353	1726	0.445	780	573	982	744	0
5	9	13	"iYER035W"	"iYER035W"	4420	21920	120	901	1268	1034	52	73	112	93	75	0	647	900	703	91	111	111	77	67	0	1.527	1.503	1.549	1.733	2.163	1.479	0.883	120	630	1405	2025	0.611	849	556	1216	809	0
5	10	13	"iYERWdelta9"	"iYERWdelta9"	4610	21920	110	212	219	126	54	73	96	62	38	0	230	230	134	93	108	89	57	42	0	1.153	1.204	1.023	1.052	2.656	1.162	0.704	80	541	295	302	0.206	158	137	165	137	0
5	11	13	"iYER050C"	"iYER050C"	4810	21920	110	125	134	63	54	64	33	76	55	0	170	164	85	94	101	36	61	55	0	0.934	1.143	0.848	0.927	2.394	1.420	0.327	80	554	147	150	-0.098	71	76	80	70	0
5	12	13	"iYER053C-1"	"iYER053C-1"	5010	21910	130	1452	2086	1639	55	81	120	94	89	0	1705	2043	1609	96	121	125	86	82	0	0.868	1.043	1.052	1.190	1.885	1.014	0.856	120	707	3006	3978	-0.204	1397	1609	2031	1947	0
5	13	13	"iYFR048W"	"iYFR048W"	5220	21930	120	528	654	512	54	75	109	80	64	0	1074	1194	928	96	121	125	80	75	0	0.485	0.546	0.519	0.630	2.503	0.528	0.894	120	627	1452	1698	-1.045	474	978	600	1098	0
5	14	13	"iYFR052W"	"iYFR052W"	5420	21910	110	357	351	181	54	68	57	88	80	0	809	733	442	95	117	95	83	76	0	0.424	0.466	0.460	0.508	2.219	0.419	0.810	80	561	1017	935	-1.237	303	714	297	638	0
5	15	13	"iYFR054C-0"	"iYFR054C-0"	5620	21920	110	1496	1223	785	56	86	147	82	72	0	1901	1772	1293	95	142	275	72	67	0	0.797	0.696	0.691	0.824	1.852	0.614	0.894	80	582	3246	2844	-0.327	1440	1806	1167	1677	0
5	16	13	"iYGL257C"	"iYGL257C"	5840	21910	110	1992	1981	1351	54	87	154	90	83	0	1614	1528	1113	92	147	330	70	65	0	1.273	1.342	1.345	1.752	2.293	1.303	0.894	80	572	3460	3363	0.349	1938	1522	1927	1436	0
5	17	13	"iYGL256W-3"	"iYGL256W-3"	6020	21920	110	1377	1185	703	52	73	101	93	82	0	1155	982	619	89	111	110	88	72	0	1.243	1.269	1.200	1.397	1.846	1.196	0.883	80	562	2391	2026	0.314	1325	1066	1133	893	0
5	18	13	"iYGL252C"	"iYGL252C"	6230	21920	110	2291	2513	1661	55	105	290	90	83	0	2237	2124	1419	91	140	299	81	78	0	1.042	1.209	1.191	1.410	1.973	1.150	0.871	80	565	4382	4491	0.059	2236	2146	2458	2033	0
5	19	13	"iYGL233W"	"iYGL233W"	6410	21920	110	405	427	255	56	105	284	60	27	0	785	749	516	96	153	301	65	53	0	0.507	0.568	0.565	0.705	2.372	0.755	0.689	80	554	1038	1024	-0.981	349	689	371	653	0
5	20	13	"iYGL228W"	"iYGL228W"	6620	21920	110	1868	1707	1103	55	91	162	88	83	0	988	892	570	95	132	162	77	68	0	2.030	2.073	2.033	2.439	2.507	1.999	0.840	80	576	2706	2449	1.022	1813	893	1652	797	0
5	21	13	"itV(AAC)G3-0"	"itV(AAC)G3-0"	6810	21910	110	3240	2517	1591	56	112	235	90	82	0	3230	2395	1596	89	147	243	88	76	0	1.014	1.067	1.046	1.163	1.549	1.042	0.931	80	540	6325	4767	0.020	3184	3141	2461	2306	0
5	1	14	"iYGL208W"	"iYGL208W"	2830	22110	120	1231	1563	1199	53	63	80	95	88	0	667	895	675	93	98	29	90	84	0	2.052	1.883	1.853	2.156	1.989	1.887	0.899	120	684	1752	2312	1.037	1178	574	1510	802	0
5	2	14	"itH(GUG)G1"	"itH(GUG)G1"	3040	22120	120	463	470	267	53	63	87	85	76	0	603	646	396	92	96	30	90	85	0	0.802	0.753	0.729	0.846	2.028	0.681	0.802	120	574	921	971	-0.318	410	511	417	554	0
5	3	14	"itK(UUU)G1"	"itK(UUU)G1"	3240	22120	130	1502	1630	1210	51	64	98	91	85	0	1194	1513	1203	91	104	114	84	77	0	1.316	1.110	1.102	1.344	2.061	1.075	0.905	120	660	2554	3001	0.396	1451	1103	1579	1422	0
5	4	14	"iYGR091W"	"iYGR091W"	3420	22130	100	889	877	600	54	68	81	87	85	0	885	809	509	93	102	41	85	81	0	1.054	1.149	1.133	1.287	2.641	1.233	0.834	80	492	1627	1539	0.076	835	792	823	716	0
5	5	14	"iYGR095C"	"iYGR095C"	3640	22130	130	595	674	495	54	63	40	97	95	0	552	623	425	93	102	78	88	79	0	1.179	1.170	1.123	1.231	1.899	1.145	0.821	120	715	1000	1150	0.237	541	459	620	530	0
5	6	14	"iYGR099W"	"iYGR099W"	3850	22130	130	767	1127	958	52	57	26	100	97	0	461	604	464	92	182	1458	5	0	0	1.938	2.100	2.074	2.236	1.916	0.071	0.025	120	669	1084	1587	0.954	715	369	1075	512	0
5	7	14	"iYGR111W"	"iYGR111W"	4040	22120	120	1184	1354	850	51	55	75	100	95	0	735	855	555	88	92	46	94	86	0	1.751	1.699	1.785	1.958	1.759	1.500	0.600	120	566	1780	2070	0.808	1133	647	1303	767	0
5	8	14	"iYGR117C"	"iYGR117C"	4220	22120	110	1654	1550	1067	52	69	107	92	81	0	2065	1802	1215	91	108	107	88	77	0	0.812	0.876	0.866	0.976	1.834	0.873	0.886	80	507	3576	3209	-0.301	1602	1974	1498	1711	0
5	9	14	"itN(GUU)G"	"itN(GUU)G"	4420	22130	100	695	651	399	53	75	110	85	70	0	549	498	315	92	116	140	71	63	0	1.405	1.473	1.450	1.485	1.948	1.454	0.793	80	514	1099	1004	0.490	642	457	598	406	0
5	10	14	"iYGR133W"	"iYGR133W"	4630	22120	110	834	876	552	53	68	68	96	91	0	433	425	242	91	99	37	85	81	0	2.284	2.464	2.412	2.709	2.204	2.497	0.843	80	587	1123	1157	1.191	781	342	823	334	0
5	11	14	"iYGR138C"	"iYGR138C"	4830	22130	100	335	337	194	54	66	66	88	78	0	295	293	155	92	98	31	80	75	0	1.384	1.408	1.343	1.609	2.479	1.359	0.732	80	506	484	484	0.469	281	203	283	201	0
5	12	14	"iYGR142W"	"iYGR142W"	5020	22130	100	702	658	414	53	66	68	86	77	0	1176	997	680	93	106	80	76	71	0	0.599	0.669	0.674	0.799	2.448	0.633	0.866	80	505	1732	1509	-0.739	649	1083	605	904	0
5	13	14	"iYGR154C"	"iYGR154C"	5230	22130	120	1885	2315	1843	53	68	101	95	90	0	935	1027	761	96	109	80	85	76	0	2.184	2.430	2.401	2.720	2.273	2.535	0.863	120	629	2671	3193	1.127	1832	839	2262	931	0
5	14	14	"iYGR158C"	"iYGR158C"	5430	22130	100	770	707	500	53	69	106	87	71	0	819	690	453	97	108	64	78	73	0	0.993	1.103	1.041	1.215	2.326	1.113	0.758	80	501	1439	1247	-0.010	717	722	654	593	0
5	15	14	"iYGRCdelta30"	"iYGRCdelta30"	5620	22130	100	503	492	332	56	78	89	83	75	0	443	404	224	98	117	77	77	71	0	1.296	1.425	1.368	1.362	1.841	1.523	0.673	80	519	792	742	0.374	447	345	436	306	0
5	16	14	"iYHR094C"	"iYHR094C"	5840	22130	110	571	729	556	55	75	88	91	81	0	747	848	643	93	115	200	71	60	0	0.789	0.893	0.923	1.072	1.975	0.819	0.837	80	578	1170	1429	-0.342	516	654	674	755	0
5	17	14	"iYHR098C"	"iYHR098C"	6020	22130	100	2853	2672	1649	53	88	164	96	87	0	1074	984	626	90	105	62	85	81	0	2.846	2.930	3.011	3.418	2.371	2.984	0.870	80	494	3784	3513	1.509	2800	984	2619	894	0
5	18	14	"iYHR102W"	"iYHR102W"	6220	22130	110	786	851	504	55	89	155	88	77	0	665	679	490	90	110	92	75	65	0	1.271	1.351	1.447	1.869	2.521	1.197	0.789	80	585	1306	1385	0.346	731	575	796	589	0
5	19	14	"iYHR119W"	"iYHR119W"	6440	22130	120	700	722	407	55	70	54	95	90	0	1013	958	510	96	111	67	89	87	0	0.703	0.774	0.739	0.851	2.039	0.768	0.852	120	652	1562	1529	-0.508	645	917	667	862	0
5	20	14	"iYHR123W"	"iYHR123W"	6630	22130	110	1203	1171	627	56	68	47	100	98	0	720	723	382	95	104	43	95	93	0	1.835	1.775	1.701	1.841	1.766	1.735	0.870	80	540	1772	1743	0.876	1147	625	1115	628	0
5	21	14	"iYHR127W"	"iYHR127W"	6820	22130	100	863	834	502	56	73	77	90	85	0	1525	1364	902	89	107	103	82	77	0	0.562	0.610	0.631	0.742	2.001	0.576	0.851	80	525	2243	2053	-0.831	807	1436	778	1275	0
5	1	15	"iYHR143W"	"iYHR143W"	2830	22330	150	827	1510	1448	53	63	93	100	98	0	508	793	632	93	98	43	97	94	0	1.865	2.081	1.926	2.054	1.471	2.229	0.953	156	884	1189	2157	0.899	774	415	1457	700	0
5	2	15	"iYHRCdelta11"	"iYHRCdelta11"	3040	22330	140	466	644	481	51	54	27	100	99	0	336	462	306	88	91	29	96	92	0	1.673	1.586	1.590	1.638	1.576	1.593	0.949	156	653	663	967	0.743	415	248	593	374	0
5	3	15	"iYHR149C"	"iYHR149C"	3220	22320	110	730	731	478	52	67	66	91	78	0	482	468	294	89	96	38	77	73	0	1.725	1.792	1.811	2.115	1.985	1.759	0.920	80	506	1071	1058	0.787	678	393	679	379	0
5	4	15	"iYHR164C"	"iYHR164C"	3440	22340	120	1225	1229	848	52	65	61	100	97	0	850	834	497	90	96	37	97	93	0	1.543	1.582	1.524	1.575	1.448	1.649	0.944	120	647	1933	1921	0.626	1173	760	1177	744	0
5	5	15	"iYHR168W"	"iYHR168W"	3640	22330	110	750	677	447	51	55	19	97	96	0	426	421	277	87	89	20	85	81	0	2.062	1.874	1.896	2.263	1.912	1.781	0.912	80	522	1038	960	1.044	699	339	626	334	0
5	6	15	"iYHR173C"	"iYHR173C"	3830	22330	100	421	501	540	52	59	35	85	83	0	660	742	534	91	218	1735	2	0	0	0.649	0.690	0.565	0.697	1.761	0.834	0.763	80	471	938	1100	-0.625	369	569	449	651	0
5	7	15	"itT(AGU)J"	"itT(AGU)J"	4020	22330	100	862	876	497	51	72	105	88	86	0	774	804	486	90	111	104	87	80	0	1.186	1.155	1.193	1.340	1.679	1.122	0.938	80	489	1495	1539	0.246	811	684	825	714	0
5	8	15	"iYJL197W"	"iYJL197W"	4220	22330	100	607	685	534	53	86	135	80	73	0	1232	1590	1181	91	153	278	78	71	0	0.486	0.422	0.430	0.489	1.821	0.413	0.762	80	512	1695	2131	-1.042	554	1141	632	1499	0
5	9	15	"iYJL192C"	"iYJL192C"	4430	22330	100	878	897	492	54	90	151	87	80	0	934	857	487	90	161	300	77	63	0	0.976	1.099	1.130	1.272	1.599	1.070	0.951	80	495	1668	1610	-0.035	824	844	843	767	0
5	10	15	"iYJL173C"	"iYJL173C"	4620	22330	110	781	767	483	52	79	135	81	76	0	692	673	446	89	111	118	76	71	0	1.209	1.224	1.255	1.549	2.227	1.181	0.934	80	556	1332	1299	0.274	729	603	715	584	0
5	11	15	"iYJL168C"	"iYJL168C"	4830	22330	100	662	648	378	53	68	83	88	80	0	530	525	298	91	102	68	80	76	0	1.387	1.371	1.346	1.547	1.856	1.308	0.910	80	501	1048	1029	0.472	609	439	595	434	0
5	12	15	"iYJL164C"	"iYJL164C"	5010	22330	100	1535	1472	991	53	93	196	85	75	0	942	1055	705	93	119	140	77	75	0	1.746	1.475	1.505	1.748	1.722	1.457	0.941	80	486	2331	2381	0.804	1482	849	1419	962	0
5	13	15	"isnR128"	"isnR128"	5220	22330	100	551	526	239	54	101	205	83	66	0	848	756	403	98	130	150	80	75	0	0.663	0.717	0.691	0.867	2.268	0.687	0.859	80	459	1247	1130	-0.594	497	750	472	658	0
5	14	15	"iYJL146W"	"iYJL146W"	5420	22330	100	2095	1619	937	55	79	98	90	83	0	2234	1787	1079	99	127	123	85	81	0	0.956	0.927	0.942	1.139	1.890	0.907	0.961	80	470	4175	3252	-0.066	2040	2135	1564	1688	0
5	15	15	"iYJL141C"	"iYJL141C"	5630	22330	100	1387	1376	864	55	79	99	97	87	0	908	965	665	96	123	123	80	76	0	1.640	1.520	1.564	1.906	1.740	1.427	0.960	80	478	2144	2190	0.714	1332	812	1321	869	0
5	16	15	"iYJL125C"	"iYJL125C"	5840	22330	100	230	394	535	54	65	56	86	68	0	328	439	533	91	99	49	82	71	0	0.743	0.977	0.910	1.017	1.898	0.986	0.923	80	450	413	688	-0.429	176	237	340	348	0
5	17	15	"iYJL120W"	"iYJL120W"	6020	22330	100	568	670	412	54	73	99	91	82	0	420	442	242	90	100	63	87	80	0	1.558	1.750	1.818	2.008	1.945	1.717	0.918	80	435	844	968	0.639	514	330	616	352	0
5	18	15	"iYJL115W"	"iYJL115W"	6210	22330	100	611	570	315	56	76	100	83	73	0	647	647	365	92	106	86	85	73	0	1.000	0.926	0.917	1.065	1.828	0.908	0.947	80	446	1110	1069	0.000	555	555	514	555	0
5	19	15	"iYKL211C"	"iYKL211C"	6400	22320	110	1487	1476	1008	57	95	171	82	75	0	718	640	419	96	116	93	72	66	0	2.299	2.608	2.669	3.014	1.785	2.471	0.938	80	509	2052	1963	1.201	1430	622	1419	544	0
5	20	15	"itT(CGU)K"	"itT(CGU)K"	6610	22330	110	1841	1622	987	58	111	233	83	77	0	855	769	452	96	121	116	82	73	0	2.349	2.324	2.299	2.675	1.734	2.290	0.952	80	520	2542	2237	1.232	1783	759	1564	673	0
5	21	15	"iYKL205W"	"iYKL205W"	6810	22330	110	744	672	391	55	82	166	76	68	0	626	613	389	87	103	84	77	70	0	1.278	1.173	1.216	1.488	1.876	1.096	0.953	80	547	1228	1143	0.354	689	539	617	526	0
5	1	16	"iYKLCdelta2"	"iYKLCdelta2"	2830	22520	110	259	268	196	54	63	87	67	55	0	325	332	217	89	97	51	72	67	0	0.869	0.881	0.860	1.008	2.806	0.875	0.779	80	484	441	457	-0.203	205	236	214	243	0
5	2	16	"iYKL187C"	"iYKL187C"	3020	22510	120	592	814	631	51	59	61	93	85	0	584	727	547	86	96	72	80	75	0	1.086	1.190	1.245	1.405	1.762	1.193	0.928	120	508	1039	1404	0.119	541	498	763	641	0
5	3	16	"iYKL183W"	"iYKL183W"	3220	22520	110	740	756	512	51	70	126	80	73	0	527	562	377	89	99	66	78	71	0	1.573	1.490	1.455	1.614	1.916	1.502	0.894	80	517	1127	1178	0.654	689	438	705	473	0
5	4	16	"iYKL166C-1"	"iYKL166C-1"	3420	22520	110	1432	1310	809	51	78	157	87	81	0	1367	1333	898	90	108	102	85	81	0	1.081	1.013	0.994	1.210	1.761	0.983	0.907	80	481	2658	2502	0.113	1381	1277	1259	1243	0
5	5	16	"iYKL164C-1"	"iYKL164C-1"	3610	22520	110	881	803	514	51	89	188	82	66	0	439	418	260	88	107	100	73	57	0	2.365	2.279	2.176	2.539	1.898	2.317	0.915	80	513	1181	1082	1.242	830	351	752	330	0
5	6	16	"iYKL162C"	"iYKL162C"	3810	22520	110	760	814	564	52	94	184	76	66	0	599	618	432	88	107	87	77	68	0	1.386	1.438	1.413	1.587	1.588	1.368	0.904	80	529	1219	1292	0.470	708	511	762	530	0
5	7	16	"iYKL148C"	"iYKL148C"	4020	22520	110	899	865	505	54	84	129	83	78	0	830	734	432	90	110	96	80	73	0	1.142	1.259	1.236	1.464	1.946	1.319	0.882	80	529	1585	1455	0.191	845	740	811	644	0
5	8	16	"iYKL143W"	"iYKL143W"	4220	22520	110	1036	1137	839	54	83	125	87	76	0	452	548	382	88	107	83	75	66	0	2.698	2.354	2.388	2.787	2.170	2.283	0.918	80	507	1346	1543	1.432	982	364	1083	460	0
5	9	16	"iYKL139W"	"iYKL139W"	4420	22530	120	1259	1440	1163	52	75	105	88	78	0	3316	3676	3220	89	106	107	98	90	0	0.374	0.387	0.398	0.436	1.660	0.363	0.925	120	448	4434	4975	-1.419	1207	3227	1388	3587	0
5	10	16	"iYLL025W"	"iYLL025W"	4570	22520	120	845	858	534	51	58	42	99	96	0	1873	1706	935	87	98	100	95	86	0	0.445	0.498	0.476	0.551	1.625	0.479	0.759	120	453	2580	2426	-1.170	794	1786	807	1619	0
5	11	16	"iYLL021W"	"iYLL021W"	4750	22520	100	671	665	437	51	56	22	98	87	0	1626	1421	972	90	96	39	92	85	0	0.404	0.461	0.460	0.556	2.018	0.442	0.851	80	493	2156	1945	-1.309	620	1536	614	1331	0
5	12	16	"iYLL017W"	"iYLL017W"	4960	22520	110	924	896	553	51	55	21	100	96	0	575	556	332	91	95	36	83	82	0	1.804	1.817	1.814	2.170	2.048	1.763	0.928	80	536	1357	1310	0.851	873	484	845	465	0
5	13	16	"iYLL001W"	"iYLL001W"	5150	22510	140	337	533	510	53	79	162	57	47	0	1162	2398	2558	91	110	120	88	75	0	0.265	0.208	0.210	0.215	2.006	0.192	0.891	156	673	1355	2787	-1.915	284	1071	480	2307	0
5	14	16	"iYLR003C"	"iYLR003C"	5350	22510	140	165	234	198	53	63	58	62	49	0	337	568	522	90	103	79	66	58	0	0.453	0.379	0.370	0.436	2.688	0.349	0.791	156	647	359	659	-1.141	112	247	181	478	0
5	15	16	"iYLR007W"	"iYLR007W"	5550	22510	140	265	328	270	54	70	82	65	53	0	419	577	476	92	111	102	69	58	0	0.645	0.565	0.592	0.682	2.184	0.536	0.809	156	640	538	759	-0.632	211	327	274	485	0
5	16	16	"iYLR024C"	"iYLR024C"	5750	22510	140	902	1476	1399	54	66	54	91	82	0	403	676	600	88	98	47	80	71	0	2.692	2.418	2.412	2.472	1.974	2.420	0.943	156	636	1163	2010	1.429	848	315	1422	588	0
5	17	16	"iYLR028C"	"iYLR028C"	5950	22510	140	469	518	396	54	61	58	73	67	0	321	369	261	87	94	42	69	66	0	1.774	1.645	1.662	1.700	2.000	1.610	0.905	156	616	649	746	0.827	415	234	464	282	0
5	18	16	"iYLR032W"	"iYLR032W"	6150	22510	140	361	418	328	54	68	85	70	60	0	410	529	421	92	101	61	70	64	0	0.965	0.833	0.857	0.950	2.097	0.787	0.877	156	639	625	801	-0.051	307	318	364	437	0
5	19	16	"iYLR044C"	"iYLR044C"	6350	22510	140	1135	1574	1465	55	77	134	78	72	0	1001	1664	1603	93	111	105	79	69	0	1.189	0.967	0.974	1.065	1.885	0.933	0.937	156	665	1988	3090	0.250	1080	908	1519	1571	0
5	20	16	"iYLR048W"	"iYLR048W"	6550	22510	140	509	662	632	55	91	191	62	50	0	861	1109	1114	95	112	95	75	69	0	0.593	0.599	0.626	0.661	1.923	0.569	0.932	156	664	1220	1621	-0.755	454	766	607	1014	0
5	21	16	"iYLR052W"	"iYLR052W"	6750	22510	140	285	399	372	52	72	140	59	42	0	393	567	505	86	97	69	72	63	0	0.759	0.721	0.707	0.736	1.852	0.708	0.845	156	764	540	828	-0.398	233	307	347	481	0
5	1	17	"iYLR364W"	"iYLR364W"	2750	22710	140	811	940	685	53	59	33	92	91	0	658	759	506	91	94	23	91	88	0	1.337	1.328	1.296	1.334	1.855	1.371	0.919	156	626	1325	1555	0.419	758	567	887	668	0
5	2	17	"iYLR369W"	"iYLR369W"	2950	22710	140	348	454	355	52	57	23	88	82	0	369	530	432	87	95	59	78	71	0	1.050	0.907	0.880	0.952	2.246	0.625	0.586	156	555	578	845	0.070	296	282	402	443	0
5	3	17	"iYLR373C"	"iYLR373C"	3150	22710	140	243	315	277	50	58	62	64	58	0	166	289	231	88	96	68	53	45	0	2.474	1.318	1.197	1.411	2.762	0.970	0.524	156	589	271	466	1.307	193	78	265	201	0
5	4	17	"iYLR389C"	"iYLR389C"	3350	22710	140	682	787	676	50	63	110	73	64	0	266	318	228	90	99	77	62	54	0	3.591	3.232	3.001	2.501	2.604	3.177	0.901	156	636	808	965	1.844	632	176	737	228	0
5	5	17	"iYLR394W"	"iYLR394W"	3550	22710	140	701	939	818	51	66	121	77	67	0	1311	2046	1837	88	100	82	92	82	0	0.531	0.454	0.443	0.465	1.878	0.436	0.928	156	627	1873	2846	-0.912	650	1223	888	1958	0
5	6	17	"iYLR398C"	"iYLR398C"	3750	22710	140	489	612	500	50	70	135	69	61	0	360	510	402	87	94	53	75	65	0	1.608	1.329	1.367	1.473	1.953	1.292	0.914	156	634	712	985	0.685	439	273	562	423	0
5	7	17	"iYLR412W-1"	"iYLR412W-1"	3950	22710	140	568	918	839	51	67	102	76	65	0	516	956	900	85	98	77	75	69	0	1.200	0.995	1.010	1.139	2.269	0.956	0.954	156	665	948	1738	0.262	517	431	867	871	0
5	8	17	"iYLR417W"	"iYLR417W"	4150	22710	140	406	588	510	51	62	76	71	62	0	412	609	543	86	95	63	67	62	0	1.089	1.027	1.023	1.119	2.078	0.974	0.936	156	648	681	1060	0.123	355	326	537	523	0
5	9	17	"iYLRCdelta24"	"iYLRCdelta24"	4350	22710	140	341	574	539	51	66	87	67	58	0	365	555	507	87	99	91	62	54	0	1.043	1.118	1.122	1.105	2.136	1.086	0.927	156	614	568	991	0.061	290	278	523	468	0
5	10	17	"iYLR436C"	"iYLR436C"	4550	22710	140	280	334	278	52	56	26	73	64	0	231	297	217	89	94	75	57	49	0	1.606	1.356	1.336	1.370	2.081	1.322	0.892	156	717	370	490	0.683	228	142	282	208	0
5	11	17	"iYLR439W"	"iYLR439W"	4820	22720	110	403	398	204	52	56	26	100	98	0	697	766	523	90	98	47	93	82	0	0.578	0.512	0.517	0.671	1.896	0.442	0.846	80	581	958	1022	-0.790	351	607	346	676	0
5	12	17	"iYLR444C"	"iYLR444C"	5010	22720	110	466	451	233	53	62	36	96	87	0	430	424	226	94	103	51	81	75	0	1.229	1.206	1.251	1.346	1.733	1.160	0.891	80	564	749	728	0.298	413	336	398	330	0
5	13	17	"iYMR130W"	"iYMR130W"	5210	22720	110	373	377	239	54	64	43	90	77	0	503	527	376	91	106	86	72	67	0	0.774	0.741	0.765	0.980	2.203	0.663	0.886	80	573	731	759	-0.369	319	412	323	436	0
5	14	17	"iYMR134W"	"iYMR134W"	5420	22730	110	676	691	401	53	61	38	98	96	0	1078	1081	685	90	101	58	92	88	0	0.631	0.644	0.650	0.785	2.016	0.607	0.916	80	554	1611	1629	-0.665	623	988	638	991	0
5	15	17	"iYMR138W"	"iYMR138W"	5610	22720	110	2336	2150	1366	53	80	169	95	86	0	1056	955	619	91	105	91	81	77	0	2.366	2.427	2.475	2.934	1.719	2.345	0.940	80	542	3248	2961	1.242	2283	965	2097	864	0
5	16	17	"iYMR155W"	"iYMR155W"	5810	22720	110	356	370	231	53	78	165	71	45	0	400	425	302	86	100	90	71	62	0	0.965	0.935	0.908	1.024	2.038	0.843	0.819	80	564	617	656	-0.051	303	314	317	339	0
5	17	17	"itM(CAU)M"	"itM(CAU)M"	6010	22720	110	251	233	113	53	58	24	86	80	0	296	284	158	89	95	29	77	72	0	0.957	0.923	0.905	1.005	2.154	0.794	0.792	80	550	405	375	-0.064	198	207	180	195	0
5	18	17	"iYMR161W"	"iYMR161W"	6210	22730	100	1104	1156	709	55	70	74	97	91	0	4827	4027	2580	90	130	266	96	83	0	0.221	0.280	0.306	0.307	1.530	0.268	0.933	80	504	5786	5038	-2.175	1049	4737	1101	3937	0
5	19	17	"iYMR176W"	"iYMR176W"	6410	22730	110	1196	1198	775	54	74	90	92	86	0	1529	1553	1101	95	138	264	77	71	0	0.796	0.785	0.829	0.968	1.690	0.729	0.916	80	585	2576	2602	-0.328	1142	1434	1144	1458	0
5	20	17	"iYMR180C"	"iYMR180C"	6620	22720	110	815	793	363	55	72	76	97	93	0	896	932	530	95	120	146	88	77	0	0.949	0.882	0.871	1.035	1.674	0.770	0.874	80	555	1561	1575	-0.076	760	801	738	837	0
5	21	17	"iYMR183C"	"iYMR183C"	6810	22720	110	1117	1064	699	53	75	99	93	78	0	732	655	443	86	105	95	76	70	0	1.647	1.777	1.877	2.323	2.048	1.685	0.935	80	576	1710	1580	0.720	1064	646	1011	569	0
5	1	18	"iYMR198W"	"iYMR198W"	2820	22910	130	2702	3186	1980	50	61	130	97	92	0	2667	2860	1731	88	135	784	83	73	0	1.028	1.131	1.140	1.181	1.570	0.999	0.670	120	612	5231	5908	0.040	2652	2579	3136	2772	0
5	2	18	"iYMR202W"	"iYMR202W"	3020	22910	150	430	531	391	51	79	182	72	51	0	517	579	386	88	142	752	23	1	0	0.883	0.978	0.899	0.962	1.932	1.132	0.736	156	676	808	971	-0.179	379	429	480	491	0
5	3	18	"iYMR206W"	"iYMR206W"	3230	22920	120	1179	1125	626	49	68	133	92	86	0	2008	2037	1232	87	97	53	95	92	0	0.588	0.552	0.551	0.620	1.748	0.520	0.899	120	578	3051	3026	-0.766	1130	1921	1076	1950	0
5	4	18	"iYNL148C"	"iYNL148C"	3430	22920	110	666	613	360	50	53	17	100	100	0	551	536	312	84	87	19	88	85	0	1.319	1.246	1.239	1.492	2.438	1.219	0.859	80	526	1083	1015	0.400	616	467	563	452	0
5	5	18	"iYNL144C-0"	"iYNL144C-0"	3630	22920	120	1673	1635	1042	51	53	14	100	100	0	675	686	428	83	87	21	94	91	0	2.740	2.627	2.589	2.834	1.751	2.665	0.875	120	584	2214	2187	1.454	1622	592	1584	603	0
5	6	18	"iYNL141W"	"iYNL141W"	3820	22920	100	807	726	428	50	54	22	95	90	0	2833	2451	1640	84	93	61	88	85	0	0.275	0.286	0.304	0.344	1.854	0.258	0.846	80	475	3506	3043	-1.861	757	2749	676	2367	0
5	7	18	"iYNL125C"	"iYNL125C"	4030	22920	110	1007	902	479	49	53	22	98	98	0	692	692	391	84	92	59	86	85	0	1.576	1.403	1.419	1.583	2.035	1.385	0.847	80	565	1566	1461	0.656	958	608	853	608	0
5	8	18	"iYNL121C"	"iYNL121C"	4220	22920	100	1529	1379	832	50	71	266	82	77	0	660	546	327	87	94	45	80	77	0	2.581	2.895	2.881	3.271	1.889	2.879	0.879	80	499	2052	1788	1.368	1479	573	1329	459	0
5	9	18	"iYNL116W"	"iYNL116W"	4420	22920	100	840	771	406	53	76	262	77	65	0	2336	2116	1346	91	109	85	92	85	0	0.351	0.355	0.399	0.452	2.141	0.312	0.804	80	515	3032	2743	-1.512	787	2245	718	2025	0
5	10	18	"iYNL097C"	"iYNL097C"	4630	22920	110	1525	1569	1117	54	61	36	97	93	0	981	1271	995	91	99	50	87	81	0	1.653	1.284	1.323	1.620	1.944	1.194	0.921	80	555	2361	2695	0.725	1471	890	1515	1180	0
5	11	18	"iYNL094W"	"iYNL094W"	4820	22910	110	3040	2755	1776	55	78	131	98	93	0	1816	1689	1158	91	109	99	95	86	0	1.730	1.690	1.647	1.853	1.795	1.634	0.901	80	557	4710	4298	0.791	2985	1725	2700	1598	0
5	12	18	"iYNL089C"	"iYNL089C"	5020	22920	100	1185	1180	798	54	95	186	81	77	0	1026	920	614	91	120	144	78	72	0	1.210	1.358	1.349	1.438	1.876	1.347	0.890	80	508	2066	1955	0.275	1131	935	1126	829	0
5	13	18	"iYNL073W"	"iYNL073W"	5220	22920	110	528	489	270	56	80	130	78	70	0	656	564	368	93	121	151	70	62	0	0.838	0.919	0.895	1.253	2.750	0.735	0.739	80	568	1035	904	-0.254	472	563	433	471	0
5	14	18	"iYNL069C"	"iYNL069C"	5420	22910	110	1954	1601	1124	52	73	103	91	78	0	2107	1811	1345	90	123	244	73	70	0	0.943	0.900	0.879	1.107	2.085	0.834	0.851	80	552	3919	3270	-0.085	1902	2017	1549	1721	0
5	15	18	"iYNL065W"	"iYNL065W"	5640	22920	120	622	803	635	52	77	162	71	60	0	1182	1680	1426	89	118	235	77	64	0	0.522	0.472	0.475	0.513	1.845	0.445	0.913	120	621	1663	2342	-0.939	570	1093	751	1591	0
5	16	18	"itG(GCC)O2"	"itG(GCC)O2"	5820	22920	110	377	396	239	54	61	37	86	82	0	864	845	555	87	99	65	81	76	0	0.416	0.451	0.455	0.553	2.235	0.426	0.792	80	502	1100	1100	-1.266	323	777	342	758	0
5	17	18	"iYOL019W"	"iYOL019W"	6020	22920	120	1311	1616	1335	54	64	41	100	92	0	1672	2508	2161	89	102	72	97	91	0	0.794	0.646	0.644	0.701	1.879	0.618	0.910	120	625	2840	3981	-0.333	1257	1583	1562	2419	0
5	18	18	"iYOL015W"	"iYOL015W"	6240	22930	120	2826	2601	2014	53	62	42	100	98	0	2259	2708	2217	88	103	147	97	87	0	1.277	0.973	0.927	0.988	1.680	0.939	0.917	120	634	4944	5168	0.353	2773	2171	2548	2620	0
5	19	18	"iYOL001W"	"iYOL001W"	6440	22930	110	550	619	409	54	60	22	100	96	0	1372	2006	1577	93	103	49	98	96	0	0.388	0.295	0.329	0.341	1.963	0.246	0.780	80	536	1775	2478	-1.367	496	1279	565	1913	0
5	20	18	"iYOR003W"	"iYOR003W"	6630	22910	110	1559	1745	1251	56	85	189	95	86	0	6169	6290	4514	97	219	821	88	75	0	0.248	0.273	0.277	0.293	1.722	0.263	0.919	80	546	7575	7882	-2.014	1503	6072	1689	6193	0
5	21	18	"iYOR007C"	"iYOR007C"	6820	22920	110	613	583	405	55	86	189	70	61	0	861	837	637	88	206	801	48	7	0	0.722	0.705	0.689	0.913	2.369	0.628	0.879	80	578	1331	1277	-0.470	558	773	528	749	0
5	1	19	"iYOR018W"	"iYOR018W"	2830	23120	150	1152	1538	1081	49	55	106	99	94	0	1235	1601	1112	86	120	651	79	43	0	0.960	0.983	0.957	1.060	1.615	0.666	0.501	156	892	2252	3004	-0.059	1103	1149	1489	1515	0
5	2	19	"iYOR021C"	"iYOR021C"	3050	23130	150	479	666	509	50	71	133	89	58	0	715	1206	998	87	102	109	94	88	0	0.683	0.550	0.525	0.603	1.839	0.517	0.834	156	718	1057	1735	-0.550	429	628	616	1119	0
5	3	19	"iYOR026W"	"iYOR026W"	3250	23120	130	534	720	574	50	52	17	100	99	0	389	558	442	86	91	29	87	84	0	1.597	1.419	1.470	1.703	2.157	1.377	0.882	120	619	787	1142	0.676	484	303	670	472	0
5	4	19	"iYOR042W"	"iYOR042W"	3450	23120	120	391	414	242	51	54	20	97	93	0	362	370	202	86	90	25	90	87	0	1.232	1.278	1.178	1.316	1.690	1.236	0.866	120	585	616	647	0.301	340	276	363	284	0
5	5	19	"iYOR045W"	"iYOR045W"	3650	23120	120	618	616	397	51	53	14	100	100	0	1624	1662	1197	82	84	20	98	98	0	0.368	0.358	0.365	0.411	1.895	0.329	0.883	120	593	2109	2145	-1.443	567	1542	565	1580	0
5	6	19	"iYOR049C"	"iYOR049C"	3860	23110	130	1046	1221	937	51	55	19	100	100	0	569	754	571	87	92	50	90	82	0	2.064	1.754	1.836	2.015	1.855	1.750	0.902	120	661	1477	1837	1.046	995	482	1170	667	0
5	7	19	"iYOR356W"	"iYOR356W"	4040	23120	100	267	264	160	51	53	15	91	83	0	358	337	196	85	88	27	80	77	0	0.791	0.845	0.785	0.904	2.252	0.803	0.772	80	462	489	465	-0.338	216	273	213	252	0
5	8	19	"iYOR360C"	"iYOR360C"	4230	23120	100	1952	1653	1062	52	75	268	82	73	0	1964	1687	1190	90	110	157	80	76	0	1.014	1.003	1.005	1.221	1.853	0.951	0.905	80	498	3774	3198	0.020	1900	1874	1601	1597	0
[truncated: 2,237,211 more chars]
