# Supplementary material for: Genome-Wide Mapping of the Cohesin Complex in the Yeast Saccharomyces cerevisiae
Source: PLoS Biol. 2004 Jul 27;2(9):e259. doi: 10.1371/journal.pbio.0020259 (PMC490026; doi:10.1371/journal.pbio.0020259)
Supplement: Dataset S30 — Cy3 = genomic DNA; Cy5 = ChIP cdc16-ts Mcd1-18Myc in W303. (2.6 MB XLS). [file pbio.0020259.sd030.xls]

ATF	1.0
27	43    
"Type=GenePix Results 1.4"
"DateTime=2001/05/01 10:37:46"
"Settings=C:\Documents and Settings\jen.JEN-W2000\My Documents\cohesinArrayData2\UP3_048.gps"
"GalFile=C:\Documents and Settings\jen\My Documents\cohesinArrayData2\UberPrint3_v2.gal"
"Scanner=GenePix 4000A [46495]"
"Comment=Cy5=MycMcd1p IP cdc16 no NZ Megee Cy3=total genomic"
"PixelSize=10"
"ImageName=635 nm	532 nm"
"FileName=C:\Documents and Settings\jen.JEN-W2000\My Documents\cohesinArrayData2\UP3_048_635_nm.tif	C:\Documents and Settings\jen.JEN-W2000\My Documents\cohesinArrayData2\UP3_048_532_nm.tif"
"PMTVolts=780	730"
"ScanPower=100	100"
"FocusPosition=0"
"NormalizationFactor:RatioOfMedians=2.30804"
"NormalizationFactor:RatioOfMeans=2.15"
"NormalizationFactor:MedianOfRatios=2.21237"
"NormalizationFactor:MeanOfRatios=1.96398"
"NormalizationFactor:RegressionRatio=2.26807"
"JpegImage=C:\Documents and Settings\jen.JEN-W2000\My Documents\cohesinArrayData2\UP3_048.jpg"
"RatioFormulation=W1/W2 (635 nm/532 nm)"
"Barcode="
"ImageOrigin=1560, 12720"
"JpegOrigin=1700, 13790"
"Creator=GenePix Pro 3.0.6.89"
"Temperature=38.92"
"LaserPower=1.71	2"
"LaserOnTime=8366	8368"
"Supplier="
"Block"	"Column"	"Row"	"Name"	"ID"	"X"	"Y"	"Dia."	"F635 Median"	"F635 Mean"	"F635 SD"	"B635 Median"	"B635 Mean"	"B635 SD"	"% > B635+1SD"	"% > B635+2SD"	"F635 % Sat."	"F532 Median"	"F532 Mean"	"F532 SD"	"B532 Median"	"B532 Mean"	"B532 SD"	"% > B532+1SD"	"% > B532+2SD"	"F532 % Sat."	"Ratio of Medians"	"Ratio of Means"	"Median of Ratios"	"Mean of Ratios"	"Ratios SD"	"Rgn Ratio"	"Rgn R�"	"F Pixels"	"B Pixels"	"Sum of Medians"	"Sum of Means"	"Log Ratio"	"F635 Median - B635"	"F532 Median - B532"	"F635 Mean - B635"	"F532 Mean - B532"	"Flags"
1	1	1	"YBL081W"	"YBL081W"	2030	14070	120	1327	1268	537	98	105	50	99	98	0	4425	4001	2297	46	64	74	99	97	0	0.281	0.296	0.292	0.358	2.132	0.253	0.813	120	672	5608	5125	-1.833	1229	4379	1170	3955	0
1	2	1	"YBL112C"	"YBL112C"	2190	14050	110	15667	14666	4981	99	105	49	100	100	0	28618	24998	9287	50	67	65	100	100	0	0.545	0.584	0.575	0.599	1.335	0.548	0.898	80	466	44136	39515	-0.876	15568	28568	14567	24948	0
1	3	1	"CDS1"	"YBR029C"	2400	14060	120	364	407	189	94	98	37	95	90	0	906	909	515	43	49	49	95	92	0	0.313	0.361	0.327	0.397	2.395	0.316	0.698	120	650	1133	1179	-1.676	270	863	313	866	0
1	4	1	"YBL083C"	"YBL083C"	2590	14050	110	236	291	209	93	98	37	88	77	0	470	515	316	41	46	33	97	97	0	0.333	0.418	0.353	0.372	2.211	0.407	0.510	80	497	572	672	-1.585	143	429	198	474	0
1	5	1	"NTH2"	"YBR001C"	2790	14060	120	1712	1913	1058	96	102	45	99	99	0	817	819	428	41	46	30	100	99	0	2.082	2.335	2.176	2.252	1.959	2.549	0.802	120	629	2392	2595	1.058	1616	776	1817	778	0
1	6	1	"RPL4A"	"YBR031W"	3000	14060	120	2722	2814	1320	94	97	32	100	100	0	2541	2530	1050	39	42	27	100	100	0	1.050	1.092	1.108	1.060	1.793	1.151	0.796	120	628	5130	5211	0.071	2628	2502	2720	2491	0
1	7	1	"BOI1"	"YBL085W"	3190	14060	110	241	295	208	95	96	31	91	71	0	254	307	220	40	42	25	93	93	0	0.682	0.749	0.669	0.698	2.923	0.812	0.555	80	525	360	467	-0.552	146	214	200	267	0
1	8	1	"COQ1"	"YBR003W"	3390	14070	130	10060	10037	3989	97	107	64	100	100	0	9663	9185	3878	42	50	59	100	100	0	1.036	1.087	1.020	1.132	1.535	1.075	0.851	120	716	19584	19083	0.050	9963	9621	9940	9143	0
1	9	1	"YBR033W"	"YBR033W"	3590	14080	130	4467	4224	1567	98	112	80	100	100	0	6121	5410	2542	42	54	66	100	100	0	0.719	0.769	0.753	0.855	1.722	0.706	0.847	120	703	10448	9494	-0.477	4369	6079	4126	5368	0
1	10	1	"RPL23A"	"YBL087C"	3800	14070	120	1488	1407	654	96	106	73	96	95	0	7012	5955	3049	43	51	63	99	98	0	0.200	0.222	0.205	0.247	1.837	0.184	0.733	120	614	8361	7223	-2.324	1392	6969	1311	5912	0
1	11	1	"YBR005W"	"YBR005W"	3990	14070	130	5746	5617	2405	96	106	59	100	100	0	4433	3877	1953	44	52	62	99	98	0	1.287	1.440	1.381	1.632	1.765	1.371	0.885	120	698	10039	9354	0.364	5650	4389	5521	3833	0
1	12	1	"PDX3"	"YBR035C"	4210	14080	130	2630	2528	1128	95	104	58	100	100	0	5591	4676	2623	40	46	40	100	100	0	0.457	0.525	0.508	0.640	1.861	0.476	0.890	120	718	8086	7069	-1.131	2535	5551	2433	4636	0
1	13	1	"YCL045C"	"YCL045C"	4410	14070	120	149	173	111	93	116	215	8	3	0	121	204	266	39	47	57	59	36	0	0.683	0.485	0.541	0.611	3.267	0.398	0.586	120	601	138	245	-0.550	56	82	80	165	0
1	14	1	"YCLX04W"	"YCLX04W"	4600	14070	120	1674	1585	525	94	109	168	100	97	0	5682	4714	1984	41	45	28	100	100	0	0.280	0.319	0.310	0.350	1.675	0.282	0.831	120	569	7221	6164	-1.836	1580	5641	1491	4673	0
1	15	1	"YCR023C"	"YCR023C"	4780	14080	130	911	992	474	95	100	43	100	99	0	1456	1640	891	41	53	262	93	90	0	0.577	0.561	0.552	0.622	2.037	0.520	0.793	120	674	2231	2496	-0.794	816	1415	897	1599	0
1	16	1	"YCL047C"	"YCL047C"	4980	14070	100	138	175	140	96	101	43	48	31	0	100	154	171	41	61	311	7	2	0	0.712	0.699	0.720	0.670	3.240	0.730	0.266	80	478	101	192	-0.490	42	59	79	113	0
1	17	1	"YCLX06C"	"YCLX06C"	5180	14080	130	2543	2392	916	100	106	47	100	100	0	5391	4571	2128	44	51	37	100	100	0	0.457	0.506	0.481	0.557	1.782	0.467	0.866	120	705	7790	6819	-1.130	2443	5347	2292	4527	0
1	18	1	"PMP1"	"YCR024C-A"	5380	14080	120	683	651	207	99	105	42	99	96	0	2854	2465	1111	41	46	32	100	99	0	0.208	0.228	0.227	0.258	1.792	0.210	0.854	120	667	3397	2976	-2.268	584	2813	552	2424	0
1	19	1	"YCL049C"	"YCL049C"	5590	14050	110	136	160	89	98	109	97	25	8	0	114	161	128	41	47	34	67	51	0	0.521	0.517	0.503	0.544	3.560	1.873	0.135	80	522	111	182	-0.942	38	73	62	120	0
1	20	1	"YCLX08C"	"YCLX08C"	5780	14070	130	2015	1879	638	99	111	78	98	97	0	4594	3750	1683	44	69	175	96	94	0	0.421	0.480	0.453	0.546	1.848	0.445	0.888	120	688	6466	5486	-1.248	1916	4550	1780	3706	0
1	21	1	"YCR026C"	"YCR026C"	5970	14070	130	397	403	198	99	108	67	86	78	0	859	863	572	43	70	186	84	65	0	0.365	0.371	0.379	0.400	2.105	0.316	0.690	120	751	1114	1124	-1.453	298	816	304	820	0
1	1	2	"LRE1"	"YCL051W"	1950	14270	80	267	422	426	104	104	34	86	76	0	316	413	368	61	87	96	78	59	0	0.639	0.903	0.895	0.767	2.576	1.073	0.753	52	248	418	670	-0.646	163	255	318	352	0
1	2	2	"YCLX10C"	"YCLX10C"	2180	14270	130	11217	10277	4478	105	111	48	100	100	0	3966	3508	1490	51	71	77	100	99	0	2.838	2.942	2.941	2.949	1.511	3.062	0.913	120	654	15027	13629	1.505	11112	3915	10172	3457	0
1	3	2	"FEN2"	"YCR028C"	2370	14280	120	7587	6850	2568	100	165	538	97	96	0	9572	8562	4504	48	154	824	94	92	0	0.786	0.793	0.746	0.909	1.760	0.701	0.892	120	594	17011	15264	-0.347	7487	9524	6750	8514	0
1	4	2	"SHR3"	"YDL212W"	2600	14280	150	448	641	528	105	167	482	38	24	0	842	1687	1734	48	183	746	51	41	0	0.432	0.327	0.318	0.365	2.510	0.409	0.703	156	748	1137	2175	-1.211	343	794	536	1639	-50
1	5	2	"THI13"	"YDL244W"	2800	14280	150	1445	1865	1519	105	129	134	85	83	0	3455	4018	3278	50	162	732	81	73	0	0.394	0.444	0.394	0.423	2.032	0.430	0.842	156	684	4745	5728	-1.345	1340	3405	1760	3968	0
1	6	2	"REG1"	"YDR028C"	3010	14280	120	256	276	152	93	97	34	80	72	0	546	573	472	40	45	27	89	81	0	0.322	0.343	0.350	0.414	2.416	0.320	0.641	120	599	669	716	-1.634	163	506	183	533	0
1	7	2	"YDL214C"	"YDL214C"	3210	14290	120	163	180	96	92	102	67	54	21	0	172	229	182	42	54	114	53	29	0	0.546	0.471	0.494	0.541	3.271	0.356	0.240	120	625	201	275	-0.873	71	130	88	187	0
1	8	2	"YDL246C"	"YDL246C"	3410	14260	90	125	132	43	99	105	41	38	13	0	130	128	52	43	50	34	84	59	0	0.299	0.388	0.482	0.516	2.352	0.554	0.202	52	398	113	118	-1.743	26	87	33	85	0
1	9	2	"RAD28"	"YDR030C"	3610	14280	120	436	567	412	98	105	58	91	83	0	853	1343	1237	42	49	37	98	97	0	0.417	0.360	0.348	0.372	2.298	0.298	0.677	120	590	1149	1770	-1.263	338	811	469	1301	0
1	10	2	"YDL216C"	"YDL216C"	3790	14280	120	295	360	230	95	103	65	76	61	0	791	1169	1037	44	49	36	97	94	0	0.268	0.236	0.242	0.270	2.250	0.195	0.711	120	542	947	1390	-1.901	200	747	265	1125	0
1	11	2	"COS7"	"YDL248W"	3980	14280	130	966	1010	471	95	102	38	100	98	0	2057	1988	1049	42	49	58	98	95	0	0.432	0.470	0.474	0.514	1.778	0.440	0.780	120	647	2886	2861	-1.210	871	2015	915	1946	0
1	12	2	"YDR032C"	"YDR032C"	4180	14280	120	595	661	451	97	107	75	89	75	0	1110	1636	1411	41	46	37	98	96	0	0.466	0.354	0.373	0.387	2.055	0.303	0.743	120	590	1567	2159	-1.102	498	1069	564	1595	0
1	13	2	"YDL218W"	"YDL218W"	4390	14280	120	3234	2911	1536	94	106	92	99	99	0	5466	4865	2883	41	54	212	94	88	0	0.579	0.584	0.564	0.678	2.005	0.549	0.858	120	616	8565	7641	-0.789	3140	5425	2817	4824	0
1	14	2	"YRB1"	"YDR002W"	4610	14280	120	4289	4088	940	95	100	35	100	100	0	3816	3378	1151	40	47	39	100	100	0	1.111	1.196	1.145	1.293	1.573	1.155	0.909	120	599	7970	7331	0.151	4194	3776	3993	3338	0
1	15	2	"LYS14"	"YDR034C"	4800	14280	120	2779	3097	1701	99	102	34	100	100	0	3028	3014	1618	40	41	21	99	99	0	0.897	1.008	0.908	1.041	1.846	1.008	0.765	120	560	5668	5972	-0.157	2680	2988	2998	2974	0
1	16	2	"MRP1"	"YDR347W"	5010	14290	140	4510	4165	1296	102	107	42	100	100	0	6984	5909	2307	42	50	39	100	100	0	0.635	0.693	0.655	0.735	1.663	0.651	0.895	156	731	11350	9930	-0.655	4408	6942	4063	5867	0
1	17	2	"RGA2"	"YDR379W"	5210	14280	130	4875	4401	1516	98	107	72	100	100	0	12424	10269	4851	42	61	221	99	99	0	0.386	0.421	0.387	0.473	1.605	0.377	0.872	120	574	17159	14530	-1.374	4777	12382	4303	10227	0
1	18	2	"YDR411C"	"YDR411C"	5370	14280	110	1974	1965	858	96	114	104	100	100	0	6625	6247	2918	41	95	385	100	96	0	0.285	0.301	0.293	0.312	1.727	0.281	0.876	80	513	8462	8075	-1.810	1878	6584	1869	6206	0
1	19	2	"YPS7"	"YDR349C"	5620	14290	150	199	239	120	98	111	78	58	38	0	397	435	229	43	70	240	77	26	0	0.285	0.360	0.305	0.321	2.540	0.338	0.454	156	870	455	533	-1.809	101	354	141	392	0
1	20	2	"YRA1"	"YDR381W"	5790	14290	130	1167	1066	440	98	107	60	99	98	0	2838	2380	1196	46	61	48	99	98	0	0.383	0.415	0.405	0.455	1.649	0.384	0.883	120	585	3861	3302	-1.385	1069	2792	968	2334	0
1	21	2	"YDR413C"	"YDR413C"	6000	14290	140	1688	1692	468	100	109	52	100	100	0	7498	6464	2685	47	72	87	100	100	0	0.213	0.248	0.232	0.285	1.761	0.224	0.877	156	842	9039	8009	-2.230	1588	7451	1592	6417	0
1	1	3	"SBE2"	"YDR351W"	2010	14490	180	3492	3351	897	103	107	45	100	100	0	12325	11421	3735	53	74	88	100	100	0	0.276	0.286	0.278	0.300	1.392	0.272	0.928	256	1151	15661	14616	-1.856	3389	12272	3248	11368	0
1	2	3	"YDR383C"	"YDR383C"	2210	14490	180	3426	3217	987	104	109	41	100	100	0	7937	7134	2473	56	75	73	99	99	0	0.422	0.440	0.446	0.465	1.470	0.414	0.903	256	782	11203	10191	-1.246	3322	7881	3113	7078	0
1	3	3	"YDR415C"	"YDR415C"	2390	14490	130	1982	1862	627	104	117	189	98	96	0	12060	10307	4313	52	84	392	99	96	0	0.156	0.171	0.169	0.184	1.403	0.159	0.925	120	523	13886	12013	-2.677	1878	12008	1758	10255	0
1	4	3	"TRR1"	"YDR353W"	2620	14490	180	3613	3517	1138	110	153	343	99	98	0	8861	8839	3352	54	168	679	98	97	0	0.398	0.388	0.392	0.407	1.401	0.378	0.932	256	783	12310	12192	-1.330	3503	8807	3407	8785	-100
1	5	3	"EFT2"	"YDR385W"	2800	14490	160	4097	4074	1262	113	185	405	100	99	0	14789	13511	4793	53	413	1884	98	93	0	0.270	0.294	0.287	0.308	1.363	0.280	0.940	208	623	18720	17419	-1.887	3984	14736	3961	13458	-100
1	6	3	"YDR417C"	"YDR417C"	3010	14490	120	1325	1252	425	102	197	458	91	75	0	4340	3718	1681	46	416	2023	78	56	0	0.285	0.313	0.309	0.354	1.619	0.230	0.817	120	545	5517	4822	-1.812	1223	4294	1150	3672	0
1	7	3	"YER097W"	"YER097W"	3220	14500	170	1618	1538	476	99	172	336	96	91	0	4147	3716	1355	48	242	1140	91	82	0	0.371	0.392	0.386	0.415	1.454	0.337	0.881	208	787	5618	5107	-1.432	1519	4099	1439	3668	0
1	8	3	"YER128W"	"YER128W"	3430	14490	150	2161	2169	681	100	173	352	99	96	0	10154	9083	3248	50	269	1257	98	92	0	0.204	0.229	0.230	0.240	1.515	0.219	0.909	156	628	12165	11102	-2.294	2061	10104	2069	9033	0
1	9	3	"YER160C"	"YER160C"	3590	14500	130	4751	4843	2309	96	135	259	99	98	0	8743	8730	4346	45	64	110	100	99	0	0.535	0.547	0.526	0.576	1.510	0.503	0.826	120	543	13353	13432	-0.902	4655	8698	4747	8685	0
1	10	3	"PRS2"	"YER099C"	3800	14490	130	4895	4591	1253	95	122	221	100	99	0	10544	8960	3423	41	52	93	100	100	0	0.457	0.504	0.484	0.557	1.490	0.465	0.917	120	690	15303	13415	-1.130	4800	10503	4496	8919	0
1	11	3	"YER130C"	"YER130C"	4020	14500	130	6159	5607	1935	95	101	39	100	100	0	5642	4803	2139	41	45	34	100	100	0	1.083	1.157	1.119	1.285	1.476	1.095	0.913	120	628	11665	10274	0.115	6064	5601	5512	4762	0
1	12	3	"RAD4"	"YER162C"	4200	14490	120	2956	2778	1123	97	157	312	97	93	0	11620	10072	5315	44	186	932	95	90	0	0.247	0.267	0.262	0.299	1.670	0.234	0.882	120	569	14435	12709	-2.018	2859	11576	2681	10028	0
1	13	3	"AST2"	"YER101C"	4430	14500	170	2218	2128	587	103	147	263	99	96	0	9542	8388	2877	49	168	782	97	96	0	0.223	0.243	0.236	0.257	1.385	0.227	0.924	208	814	11608	10364	-2.166	2115	9493	2025	8339	0
1	14	3	"PMD1"	"YER132C"	4610	14500	140	3979	3812	1829	103	112	67	100	100	0	8153	7572	4534	50	113	357	98	92	0	0.478	0.493	0.469	0.584	1.850	0.427	0.856	156	600	11979	11231	-1.064	3876	8103	3709	7522	0
1	15	3	"CHD1"	"YER164W"	4820	14500	140	3168	3033	1317	102	111	63	100	99	0	8589	7991	4708	42	83	328	95	92	0	0.359	0.369	0.356	0.450	1.893	0.318	0.873	156	695	11613	10880	-1.479	3066	8547	2931	7949	0
1	16	3	"SSA4"	"YER103W"	5040	14500	140	4999	4646	1537	104	112	46	100	100	0	10917	8746	4323	44	55	45	100	99	0	0.450	0.522	0.499	0.613	1.720	0.460	0.884	156	592	15768	13244	-1.151	4895	10873	4542	8702	0
1	17	3	"YER134C"	"YER134C"	5210	14500	140	1159	1094	328	97	103	48	99	99	0	4349	3652	1510	43	54	168	99	96	0	0.247	0.276	0.273	0.303	1.637	0.249	0.886	156	573	5368	4606	-2.020	1062	4306	997	3609	0
1	18	3	"YER166W"	"YER166W"	5390	14500	130	269	353	255	94	108	109	70	41	0	470	522	360	42	74	336	59	24	0	0.409	0.540	0.486	0.453	2.707	0.543	0.608	120	635	603	739	-1.290	175	428	259	480	0
1	19	3	"AMS1"	"YGL156W"	5610	14500	120	948	1305	889	96	104	59	98	95	0	2218	3440	2904	40	51	51	99	97	0	0.391	0.356	0.364	0.402	1.773	0.308	0.856	120	585	3030	4609	-1.354	852	2178	1209	3400	0
1	20	3	"YGL188C"	"YGL188C"	5810	14500	130	246	318	246	97	104	45	99	80	0	702	649	290	41	50	41	98	96	0	0.225	0.363	0.270	0.324	2.571	0.370	0.366	120	584	810	829	-2.149	149	661	221	608	0
1	21	3	"YGL220W"	"YGL220W"	6000	14500	140	1716	1651	494	101	109	48	100	100	0	5715	5070	2046	45	70	79	100	100	0	0.285	0.308	0.300	0.337	1.512	0.285	0.896	156	734	7285	6575	-1.812	1615	5670	1550	5025	0
1	1	4	"RCK1"	"YGL158W"	2010	14700	130	2587	2450	846	100	104	40	100	100	0	8792	7611	3566	47	58	69	100	100	0	0.284	0.311	0.301	0.342	1.548	0.281	0.876	120	609	11232	9914	-1.814	2487	8745	2350	7564	0
1	2	4	"CDC55"	"YGL190C"	2210	14700	130	1367	1510	756	99	102	35	100	100	0	3663	4023	2426	49	57	39	100	100	0	0.351	0.355	0.335	0.378	1.692	0.308	0.818	120	539	4882	5385	-1.511	1268	3614	1411	3974	0
1	3	4	"YGL222C"	"YGL222C"	2400	14700	130	1703	1591	612	97	105	53	99	99	0	5670	4740	2342	47	54	47	100	98	0	0.286	0.318	0.313	0.373	1.765	0.293	0.905	120	645	7229	6187	-1.808	1606	5623	1494	4693	0
1	4	4	"YGL160W"	"YGL160W"	2630	14700	130	1632	1518	680	96	105	60	100	99	0	6636	6798	4315	44	47	38	100	100	0	0.233	0.211	0.220	0.248	1.792	0.177	0.838	120	511	8128	8176	-2.102	1536	6592	1422	6754	0
1	5	4	"IME4"	"YGL192W"	2790	14700	120	2085	2104	872	96	101	47	100	99	0	7251	6385	3442	42	46	35	98	98	0	0.276	0.317	0.312	0.389	2.325	0.282	0.871	120	473	9198	8351	-1.858	1989	7209	2008	6343	0
1	6	4	"YGL224C"	"YGL224C"	3000	14700	130	7398	6793	2562	97	114	142	100	100	0	5497	4648	2609	42	57	179	98	96	0	1.338	1.454	1.371	1.738	1.830	1.332	0.861	120	688	12756	11302	0.421	7301	5455	6696	4606	0
1	7	4	"SUT1"	"YGL162W"	3230	14700	130	866	883	347	99	113	106	100	96	0	3998	4271	2495	43	56	52	100	100	0	0.194	0.185	0.191	0.213	1.846	0.156	0.810	120	479	4722	5012	-2.366	767	3955	784	4228	0
1	8	4	"HOS2"	"YGL194C"	3390	14700	180	6548	6227	2048	102	172	345	98	96	0	8612	7703	2884	49	259	1216	92	89	0	0.753	0.800	0.769	0.867	1.531	0.771	0.932	256	630	15009	13779	-0.410	6446	8563	6125	7654	0
1	9	4	"YGL226W"	"YGL226W"	3600	14700	140	3370	3180	1530	96	107	76	99	98	0	6529	5346	3253	44	58	54	98	96	0	0.505	0.582	0.552	0.725	2.294	0.519	0.842	156	559	9759	8386	-0.986	3274	6485	3084	5302	0
1	10	4	"YGR277C"	"YGR277C"	3810	14700	130	1945	1706	733	92	98	37	100	99	0	10184	8093	4457	39	42	22	99	98	0	0.183	0.200	0.202	0.250	2.027	0.182	0.854	120	609	11998	9668	-2.453	1853	10145	1614	8054	0
1	11	4	"YHL013C"	"YHL013C"	4010	14700	140	14175	12519	4915	94	100	40	100	100	0	7969	6558	3456	41	43	25	98	98	0	1.776	1.907	1.837	2.210	1.910	1.831	0.893	156	664	22009	18942	0.829	14081	7928	12425	6517	0
1	12	4	"YHL045W"	"YHL045W"	4210	14700	130	5787	5277	2878	96	102	42	100	100	0	12040	9600	5877	42	44	26	100	100	0	0.474	0.542	0.545	0.643	1.997	0.517	0.886	120	622	17689	14739	-1.076	5691	11998	5181	9558	0
1	13	4	"SCW4"	"YGR279C"	4430	14700	120	2485	2336	955	102	135	244	98	94	0	5752	4719	2653	47	116	484	95	89	0	0.418	0.478	0.464	0.560	1.878	0.417	0.829	120	518	8088	6906	-1.259	2383	5705	2234	4672	0
1	14	4	"RPS20"	"YHL015W"	4580	14700	130	3610	3272	1264	102	106	36	100	100	0	3184	2750	1330	43	67	69	99	97	0	1.117	1.171	1.140	1.333	1.644	1.130	0.905	120	495	6649	5877	0.159	3508	3141	3170	2707	0
1	15	4	"YHL047C"	"YHL047C"	4800	14700	140	3998	4235	2525	98	104	39	100	99	0	6539	6638	4623	41	56	156	94	91	0	0.600	0.627	0.615	0.793	2.270	0.577	0.878	156	680	10398	10734	-0.737	3900	6498	4137	6597	0
1	16	4	"YOR1"	"YGR281W"	5020	14700	130	2106	2273	1534	100	111	93	98	94	0	2901	3705	2895	40	64	268	90	87	0	0.701	0.593	0.568	0.691	2.037	0.539	0.823	120	642	4867	5838	-0.512	2006	2861	2173	3665	0
1	17	4	"YHL017W"	"YHL017W"	5210	14690	130	14019	12026	5933	101	105	35	100	100	0	7702	6151	3582	40	43	24	100	100	0	1.816	1.951	1.906	2.323	1.767	1.922	0.910	120	562	21580	18036	0.861	13918	7662	11925	6111	0
1	18	4	"YHL049C"	"YHL049C"	5400	14700	130	17103	14066	6973	98	113	113	100	100	0	29640	26027	16306	41	73	307	100	99	0	0.575	0.538	0.506	0.621	1.828	0.468	0.911	120	657	46604	39954	-0.800	17005	29599	13968	25986	0
1	19	4	"YGR283C"	"YGR283C"	5600	14700	130	2524	2189	907	97	112	112	100	97	0	6175	5103	2663	40	70	302	96	95	0	0.396	0.413	0.408	0.456	1.614	0.373	0.884	120	680	8562	7155	-1.338	2427	6135	2092	5063	0
1	20	4	"APM2"	"YHL019C"	5850	14690	130	5718	5200	2175	100	120	237	100	100	0	7927	6598	3789	41	47	31	100	100	0	0.712	0.778	0.745	0.936	1.745	0.711	0.847	120	622	13504	11657	-0.489	5618	7886	5100	6557	0
1	21	4	"YHR001W"	"YHR001W"	6030	14700	130	10843	10677	5431	100	122	235	100	100	0	3408	3242	1996	42	48	36	100	100	0	3.192	3.305	3.325	3.892	1.727	3.351	0.869	120	648	14109	13777	1.674	10743	3366	10577	3200	0
1	1	5	"YIL087C"	"YIL087C"	2010	14900	140	1731	1497	695	98	103	39	99	97	0	5184	4665	2741	50	68	162	98	93	0	0.318	0.303	0.291	0.336	1.815	0.274	0.897	156	786	6767	6014	-1.653	1633	5134	1399	4615	0
1	2	5	"RPI1"	"YIL119C"	2210	14900	130	1480	1344	504	95	101	38	100	98	0	4950	4318	2019	47	53	39	100	100	0	0.282	0.292	0.280	0.321	1.559	0.270	0.907	120	580	6288	5520	-1.824	1385	4903	1249	4271	0
1	3	5	"YIL151C"	"YIL151C"	2410	14900	130	257	283	123	93	98	37	95	86	0	309	330	168	45	48	31	95	93	0	0.621	0.667	0.622	0.635	2.459	0.610	0.527	120	608	428	475	-0.687	164	264	190	285	0
1	4	5	"YIL089W"	"YIL089W"	2620	14900	140	3178	2768	1246	93	99	42	99	99	0	4378	3965	2262	44	46	33	99	98	0	0.712	0.682	0.660	0.793	1.960	0.628	0.897	156	646	7419	6596	-0.490	3085	4334	2675	3921	0
1	5	5	"YIL121W"	"YIL121W"	2820	14900	120	4690	4391	2098	96	100	35	100	100	0	4104	3622	1992	42	44	28	100	99	0	1.131	1.200	1.177	1.368	1.777	1.178	0.865	120	494	8656	7875	0.178	4594	4062	4295	3580	0
1	6	5	"RRD1"	"YIL153W"	3000	14900	130	3744	3576	1355	97	123	200	100	100	0	4318	3776	1713	41	77	319	95	94	0	0.853	0.931	0.905	1.028	1.721	0.861	0.872	120	522	7924	7214	-0.230	3647	4277	3479	3735	0
1	7	5	"YIL091C"	"YIL091C"	3220	14900	130	3010	3350	1778	95	121	193	100	98	0	5953	6175	3603	42	78	305	100	97	0	0.493	0.531	0.500	0.564	1.697	0.495	0.852	120	577	8826	9388	-1.020	2915	5911	3255	6133	0
1	8	5	"SIM1"	"YIL123W"	3430	14900	140	2366	2209	1044	99	106	49	99	98	0	8161	7003	3959	44	56	51	98	98	0	0.279	0.303	0.294	0.347	1.926	0.277	0.882	156	554	10384	9069	-1.840	2267	8117	2110	6959	0
1	9	5	"GUT2"	"YIL155C"	3600	14900	140	4935	5141	2461	98	126	488	96	94	0	3563	3551	1914	42	52	42	98	98	0	1.374	1.437	1.360	1.574	1.879	1.427	0.861	156	565	8358	8552	0.458	4837	3521	5043	3509	0
1	10	5	"YIL093C"	"YIL093C"	3800	14900	120	1398	1351	529	92	121	492	88	70	0	4310	3939	1727	41	46	35	100	99	0	0.306	0.323	0.318	0.356	1.650	0.301	0.867	120	556	5575	5157	-1.709	1306	4269	1259	3898	0
1	11	5	"KGD1"	"YIL125W"	4010	14900	130	2918	2914	1363	92	97	45	100	100	0	5359	5349	2758	40	42	25	100	100	0	0.531	0.532	0.514	0.562	1.591	0.498	0.804	120	576	8145	8131	-0.912	2826	5319	2822	5309	0
1	12	5	"YIL157C"	"YIL157C"	4200	14900	140	3102	2726	1259	94	100	41	99	98	0	5813	5175	3142	41	48	91	98	96	0	0.521	0.513	0.483	0.615	2.101	0.459	0.891	156	697	8780	7766	-0.940	3008	5772	2632	5134	0
1	13	5	"YJR026W"	"YJR026W"	4410	14920	100	3141	4721	4130	99	152	327	87	85	0	7475	9555	9246	43	179	961	73	68	0	0.409	0.486	0.480	0.590	2.632	0.429	0.841	80	477	10474	14134	-1.289	3042	7432	4622	9512	0
1	14	5	"APS2"	"YJR058C"	4630	14890	130	393	414	222	97	134	275	52	13	0	1513	1587	1218	41	147	824	65	44	0	0.201	0.205	0.206	0.255	2.549	0.171	0.770	120	656	1768	1863	-2.314	296	1472	317	1546	0
1	15	5	"JSN1"	"YJR091C"	4810	14900	120	170	191	107	95	102	44	65	42	0	329	335	197	38	43	52	85	77	0	0.258	0.323	0.305	0.344	2.740	0.294	0.323	120	563	366	393	-1.956	75	291	96	297	0
1	16	5	"YJR028W"	"YJR028W"	5030	14910	80	2375	3477	2986	98	147	320	88	76	0	3522	7400	7121	41	202	1039	73	67	0	0.654	0.459	0.484	0.526	1.799	0.405	0.891	52	334	5758	10738	-0.612	2277	3481	3379	7359	0
1	17	5	"CBF1"	"YJR060W"	5230	14900	110	242	257	119	100	131	250	17	1	0	354	394	260	40	137	811	3	0	0	0.452	0.444	0.398	0.463	2.948	0.370	0.461	80	551	456	511	-1.145	142	314	157	354	0
1	18	5	"FIP1"	"YJR093C"	5410	14920	80	642	807	516	99	115	72	94	84	0	734	941	715	42	67	128	86	73	0	0.785	0.788	0.759	0.832	2.144	0.720	0.824	52	318	1235	1607	-0.350	543	692	708	899	0
1	19	5	"YJR030C"	"YJR030C"	5600	14900	120	658	719	523	94	107	60	85	75	0	754	971	906	40	56	103	79	68	0	0.790	0.671	0.726	0.794	2.362	0.598	0.848	120	618	1278	1556	-0.340	564	714	625	931	0
1	20	5	"NTA1"	"YJR062C"	5830	14900	120	426	458	229	96	114	237	65	29	0	525	619	417	39	43	28	99	96	0	0.679	0.624	0.632	0.700	1.910	0.561	0.782	120	614	816	942	-0.558	330	486	362	580	0
1	21	5	"RPL43B"	"YJR094W-A"	6030	14900	120	888	963	647	95	120	243	88	70	0	1742	1853	1426	39	45	37	97	95	0	0.466	0.479	0.469	0.581	2.023	0.433	0.813	120	608	2496	2682	-1.103	793	1703	868	1814	0
1	1	6	"CPR7"	"YJR032W"	2000	15100	130	1060	1165	679	97	101	39	100	100	0	1998	2053	1107	48	54	39	100	99	0	0.494	0.533	0.505	0.548	1.689	0.535	0.800	120	677	2913	3073	-1.018	963	1950	1068	2005	0
1	2	6	"CCT5"	"YJR064W"	2230	15090	130	1610	1927	1146	98	145	589	90	68	0	3193	3394	2274	47	63	176	99	95	0	0.481	0.546	0.532	0.594	1.789	0.499	0.854	120	624	4658	5176	-1.057	1512	3146	1829	3347	0
1	3	6	"YJR096W"	"YJR096W"	2410	15100	130	1161	1308	633	93	99	43	100	100	0	2584	2623	1436	45	47	34	100	100	0	0.421	0.471	0.459	0.514	1.687	0.427	0.748	120	593	3607	3793	-1.249	1068	2539	1215	2578	0
1	4	6	"YKR021W"	"YKR021W"	2630	15090	130	812	1070	774	91	97	44	100	99	0	1128	1471	1190	43	45	25	99	99	0	0.665	0.686	0.671	0.761	1.808	0.646	0.838	120	568	1806	2407	-0.590	721	1085	979	1428	0
1	5	6	"YSR3"	"YKR053C"	2810	15100	140	790	947	689	94	107	75	96	94	0	1198	1330	973	43	60	125	93	89	0	0.603	0.663	0.652	0.706	1.764	0.645	0.803	156	561	1851	2140	-0.731	696	1155	853	1287	0
1	6	6	"MRPL20"	"YKR085C"	3030	15090	190	408	409	152	95	119	167	85	42	0	1315	1254	619	41	76	269	88	82	0	0.246	0.259	0.254	0.277	1.864	0.231	0.680	256	859	1587	1527	-2.025	313	1274	314	1213	0
1	7	6	"YKR023W"	"YKR023W"	3220	15100	130	6238	6838	3679	91	101	70	100	100	0	3826	3866	2258	40	46	44	100	100	0	1.624	1.763	1.701	1.974	1.765	1.843	0.816	120	556	9933	10573	0.699	6147	3786	6747	3826	0
1	8	6	"RHO4"	"YKR055W"	3420	15100	80	212	247	139	89	98	73	67	38	0	201	246	185	39	42	21	94	90	0	0.759	0.763	0.658	0.741	2.315	0.730	0.530	52	334	285	365	-0.397	123	162	158	207	0
1	9	6	"YKR087C"	"YKR087C"	3620	15100	130	2645	2737	1648	96	124	469	91	85	0	2102	2163	1442	41	47	39	99	98	0	1.237	1.245	1.244	1.436	1.693	1.324	0.761	120	616	4610	4763	0.307	2549	2061	2641	2122	0
1	10	6	"RPC37"	"YKR025W"	3810	15100	130	1442	1524	711	95	125	467	90	77	0	2757	3234	2107	42	50	47	100	100	0	0.496	0.448	0.460	0.507	1.613	0.284	0.375	120	627	4062	4621	-1.011	1347	2715	1429	3192	0
1	11	6	"RPS21A"	"YKR057W"	4030	15100	120	319	323	156	90	97	48	89	76	0	2117	2066	1444	40	45	39	94	92	0	0.110	0.115	0.109	0.145	2.850	0.095	0.646	120	590	2306	2259	-3.181	229	2077	233	2026	0
1	12	6	"YKR089C"	"YKR089C"	4220	15100	110	255	300	172	95	107	84	72	47	0	260	358	308	40	50	110	73	48	0	0.727	0.645	0.679	0.714	2.228	0.618	0.540	80	473	380	523	-0.459	160	220	205	318	0
1	13	6	"YKR027W"	"YKR027W"	4410	15100	130	2503	2487	1215	96	107	76	100	100	0	5728	5878	3577	41	56	125	97	96	0	0.423	0.410	0.420	0.493	1.925	0.371	0.804	120	659	8094	8228	-1.240	2407	5687	2391	5837	0
1	14	6	"TIF1"	"YKR059W"	4630	15110	110	724	778	518	97	110	59	93	83	0	2515	2628	1964	41	69	141	86	85	0	0.253	0.263	0.257	0.300	2.286	0.238	0.781	80	566	3101	3268	-1.980	627	2474	681	2587	0
1	15	6	"SRL3"	"YKR091W"	4820	15100	130	921	928	455	94	97	33	98	98	0	2515	2362	1425	39	42	36	96	95	0	0.334	0.359	0.363	0.418	2.041	0.330	0.879	120	603	3303	3157	-1.582	827	2476	834	2323	0
1	16	6	"YLR232W"	"YLR232W"	5030	15100	130	541	501	194	95	97	32	98	95	0	2121	1934	1134	40	43	40	98	94	0	0.214	0.214	0.202	0.256	1.995	0.182	0.778	120	617	2527	2300	-2.222	446	2081	406	1894	0
1	17	6	"RPS28B"	"YLR264W"	5220	15100	120	527	498	233	96	100	36	95	87	0	2686	2111	1348	39	43	31	96	93	0	0.163	0.194	0.184	0.239	2.203	0.165	0.784	120	564	3078	2474	-2.619	431	2647	402	2072	0
1	18	6	"ATP14"	"YLR295C"	5440	15100	130	307	311	133	97	102	46	90	80	0	1716	1609	1031	39	49	78	90	85	0	0.125	0.136	0.139	0.179	2.642	0.116	0.676	120	583	1887	1784	-2.997	210	1677	214	1570	0
1	19	6	"TOP3"	"YLR234W"	5620	15100	130	1328	1322	542	94	98	33	100	100	0	4782	4411	2299	38	42	47	100	100	0	0.260	0.281	0.281	0.319	1.695	0.247	0.841	120	550	5978	5601	-1.943	1234	4744	1228	4373	0
1	20	6	"YLR266C"	"YLR266C"	5810	15100	120	383	529	411	94	98	33	92	83	0	826	1290	1350	38	40	18	95	92	0	0.367	0.347	0.377	0.448	2.531	0.302	0.850	120	558	1077	1687	-1.447	289	788	435	1252	0
1	21	6	"YLR297W"	"YLR297W"	6030	15090	130	585	556	283	94	99	35	97	93	0	2999	2665	1733	39	44	31	100	98	0	0.166	0.176	0.178	0.213	1.993	0.152	0.781	120	708	3451	3088	-2.592	491	2960	462	2626	0
1	1	7	"YLR236C"	"YLR236C"	2020	15300	140	382	367	160	95	131	505	7	0	0	1358	1169	651	48	66	157	87	80	0	0.219	0.243	0.237	0.260	2.089	0.199	0.602	156	850	1597	1393	-2.190	287	1310	272	1121	0
1	2	7	"SEC22"	"YLR268W"	2230	15300	130	977	938	329	97	146	606	77	10	0	6868	5837	2758	47	65	182	99	96	0	0.129	0.145	0.143	0.165	1.778	0.140	0.278	120	590	7701	6631	-2.954	880	6821	841	5790	0
1	3	7	"ECM38"	"YLR299W"	2420	15300	140	2284	2109	688	94	109	118	99	98	0	9182	7577	3483	47	68	195	100	98	0	0.240	0.268	0.258	0.306	1.675	0.237	0.886	156	657	11325	9545	-2.060	2190	9135	2015	7530	0
1	4	7	"YLR238W"	"YLR238W"	2620	15300	130	4295	3838	1519	93	111	123	100	99	0	10651	9308	4632	45	66	201	99	98	0	0.396	0.404	0.389	0.452	1.670	0.368	0.887	120	612	14808	13008	-1.336	4202	10606	3745	9263	0
1	5	7	"YLR270W"	"YLR270W"	2830	15290	130	3231	2973	1524	92	104	62	97	95	0	5061	4360	2632	43	49	58	96	92	0	0.626	0.667	0.667	0.815	1.983	0.620	0.892	120	535	8157	7198	-0.677	3139	5018	2881	4317	0
1	6	7	"YLR301W"	"YLR301W"	3010	15300	130	1991	1865	745	92	102	61	99	98	0	4217	3586	1727	42	50	62	99	97	0	0.455	0.500	0.491	0.571	1.766	0.459	0.870	120	504	6074	5317	-1.137	1899	4175	1773	3544	0
1	7	7	"MPT1"	"YMR005W"	3230	15300	120	1399	2416	2585	93	100	75	95	90	0	540	945	1118	39	51	171	75	61	0	2.607	2.564	2.663	2.692	2.370	2.554	0.837	120	555	1807	3229	1.382	1306	501	2323	906	0
1	8	7	"MIH1"	"YMR036C"	3410	15310	110	272	316	209	92	97	37	83	78	0	357	544	483	38	48	53	82	76	0	0.564	0.443	0.418	0.505	2.278	0.389	0.690	80	459	499	730	-0.826	180	319	224	506	0
1	9	7	"YMR067C"	"YMR067C"	3610	15300	120	377	439	271	95	102	40	92	88	0	442	488	302	38	48	53	89	87	0	0.698	0.764	0.675	0.754	2.156	0.791	0.715	120	550	686	794	-0.519	282	404	344	450	0
1	10	7	"YMR007W"	"YMR007W"	3810	15300	120	3467	3063	1463	94	104	68	100	99	0	2085	1768	992	40	48	48	96	95	0	1.649	1.718	1.752	1.930	1.656	1.672	0.870	120	590	5418	4697	0.722	3373	2045	2969	1728	0
1	11	7	"LYS7"	"YMR038C"	4020	15300	130	1045	919	390	90	96	36	99	97	0	4550	3835	2217	40	44	35	100	100	0	0.212	0.218	0.222	0.255	1.674	0.190	0.861	120	635	5465	4624	-2.240	955	4510	829	3795	0
1	12	7	"YMR069W"	"YMR069W"	4240	15300	130	364	359	153	92	100	39	96	90	0	765	765	466	39	41	21	95	95	0	0.375	0.368	0.395	0.443	2.351	0.302	0.666	120	590	998	993	-1.416	272	726	267	726	0
1	13	7	"YMR009W"	"YMR009W"	4410	15300	130	1305	1194	654	93	105	60	95	93	0	3268	2708	1759	40	46	46	97	92	0	0.375	0.413	0.403	0.496	2.006	0.374	0.802	120	595	4440	3769	-1.413	1212	3228	1101	2668	0
1	14	7	"YMR040W"	"YMR040W"	4620	15320	110	775	758	439	93	109	65	88	85	0	1332	1358	1034	42	57	83	82	76	0	0.529	0.505	0.470	0.615	2.229	0.433	0.798	80	520	1972	1981	-0.920	682	1290	665	1316	0
1	15	7	"YMR071C"	"YMR071C"	4840	15290	140	2181	2166	1125	93	100	49	99	99	0	3491	3143	1897	40	46	58	96	94	0	0.605	0.668	0.635	0.827	2.397	0.624	0.771	156	677	5539	5176	-0.725	2088	3451	2073	3103	0
1	16	7	"HXT2"	"YMR011W"	5020	15290	130	8359	7598	3017	96	101	39	100	100	0	8377	6889	3590	40	42	35	100	100	0	0.991	1.095	1.052	1.265	1.624	1.050	0.874	120	602	16600	14351	-0.013	8263	8337	7502	6849	0
1	17	7	"ARG80"	"YMR042W"	5250	15280	130	601	573	260	97	102	39	97	91	0	3797	2839	1683	39	43	36	99	98	0	0.134	0.170	0.165	0.206	2.098	0.144	0.717	120	642	4262	3276	-2.898	504	3758	476	2800	0
1	18	7	"YMR073C"	"YMR073C"	5450	15280	130	2012	1808	834	98	102	35	100	100	0	4091	3700	2349	38	42	25	100	100	0	0.472	0.467	0.472	0.571	1.722	0.405	0.872	120	535	5967	5372	-1.082	1914	4053	1710	3662	0
1	19	7	"YNL047C"	"YNL047C"	5620	15300	120	2617	2512	1092	97	101	34	100	100	0	5038	4737	2483	39	42	23	100	100	0	0.504	0.514	0.494	0.565	1.615	0.466	0.853	120	480	7519	7113	-0.988	2520	4999	2415	4698	0
1	20	7	"YNL080C"	"YNL080C"	5820	15290	130	3351	3091	1240	96	100	33	100	100	0	5278	4391	2273	39	43	31	100	99	0	0.621	0.688	0.664	0.780	1.599	0.633	0.892	120	596	8494	7347	-0.687	3255	5239	2995	4352	0
1	21	7	"DBP2"	"YNL112W"	6030	15290	120	1698	1806	904	95	98	30	100	100	0	3472	3668	2237	39	41	21	100	100	0	0.467	0.471	0.489	0.526	1.726	0.419	0.827	120	622	5036	5340	-1.099	1603	3433	1711	3629	0
1	1	8	"SFB2"	"YNL049C"	2010	15510	110	367	443	294	93	102	52	93	82	0	775	926	739	54	66	74	96	88	0	0.380	0.401	0.412	0.434	1.978	0.367	0.801	80	499	995	1222	-1.396	274	721	350	872	0
1	2	8	"PMS1"	"YNL082W"	2230	15500	130	1747	2434	2404	95	103	62	95	90	0	1331	2661	2861	47	56	61	96	90	0	1.287	0.895	0.898	1.005	1.992	0.856	0.889	120	603	2936	4953	0.364	1652	1284	2339	2614	0
1	3	8	"YNL114C"	"YNL114C"	2420	15500	130	498	487	191	94	99	47	95	94	0	3412	3115	1446	44	52	48	98	97	0	0.120	0.128	0.122	0.140	1.712	0.116	0.811	120	568	3772	3464	-3.059	404	3368	393	3071	0
1	4	8	"YNL051W"	"YNL051W"	2640	15490	130	7907	7153	2569	92	99	48	100	100	0	4853	4161	1850	42	46	39	100	100	0	1.624	1.714	1.677	1.858	1.405	1.673	0.919	120	628	12626	11180	0.700	7815	4811	7061	4119	0
1	5	8	"END3"	"YNL084C"	2860	15490	140	3131	3044	1867	93	100	42	99	98	0	2796	2607	1749	41	45	35	96	94	0	1.103	1.150	1.147	1.378	2.319	1.133	0.865	156	625	5793	5517	0.141	3038	2755	2951	2566	0
1	6	8	"YNL116W"	"YNL116W"	3060	15490	140	4724	4491	2159	93	102	61	99	98	0	5778	5165	3116	41	59	168	96	94	0	0.807	0.858	0.843	1.028	2.030	0.790	0.874	156	639	10368	9522	-0.309	4631	5737	4398	5124	0
1	7	8	"MSG5"	"YNL053W"	3240	15490	130	2514	2300	876	91	99	64	100	100	0	6570	5184	2783	40	51	180	98	96	0	0.371	0.429	0.421	0.507	1.746	0.371	0.839	120	508	8953	7353	-1.430	2423	6530	2209	5144	0
1	8	8	"YNL086W"	"YNL086W"	3440	15480	140	1480	1347	706	93	99	47	98	96	0	4175	3792	2371	40	51	64	96	96	0	0.335	0.334	0.323	0.390	2.200	0.300	0.836	156	658	5522	5006	-1.576	1387	4135	1254	3752	0
1	9	8	"DCP2"	"YNL118C"	3640	15490	120	1813	2007	938	93	98	44	100	100	0	3753	3880	2331	38	43	31	100	99	0	0.463	0.498	0.474	0.566	1.925	0.442	0.861	120	554	5435	5756	-1.111	1720	3715	1914	3842	0
1	10	8	"CMK2"	"YOL016C"	3840	15500	100	510	580	359	91	96	42	97	90	0	534	571	395	39	43	29	93	91	0	0.846	0.919	0.936	1.013	2.393	0.903	0.772	80	473	914	1021	-0.240	419	495	489	532	0
1	11	8	"YOL048C"	"YOL048C"	4060	15480	130	1636	1456	717	93	98	36	99	98	0	2628	2243	1250	38	42	27	98	96	0	0.596	0.618	0.609	0.701	1.851	0.586	0.851	120	616	4133	3568	-0.747	1543	2590	1363	2205	0
1	12	8	"YOL080C"	"YOL080C"	4250	15490	120	1479	1612	1048	95	101	47	98	96	0	1945	2035	1470	39	42	24	98	95	0	0.726	0.760	0.723	0.910	2.077	0.726	0.910	120	522	3290	3513	-0.462	1384	1906	1517	1996	0
1	13	8	"TLG2"	"YOL018C"	4460	15500	130	3888	4158	2575	94	98	44	100	100	0	4180	4430	3194	40	41	22	100	99	0	0.916	0.926	0.961	1.170	2.174	0.872	0.888	120	581	7934	8454	-0.126	3794	4140	4064	4390	0
1	14	8	"YOL050C"	"YOL050C"	4640	15490	130	904	845	327	89	94	33	100	99	0	2542	2136	1021	39	39	20	100	99	0	0.326	0.361	0.362	0.401	1.619	0.338	0.874	120	564	3318	2853	-1.619	815	2503	756	2097	0
1	15	8	"YOL082W"	"YOL082W"	4850	15490	120	572	644	342	92	97	34	99	96	0	3252	3432	2156	40	41	23	100	100	0	0.149	0.163	0.163	0.183	2.148	0.148	0.814	120	541	3692	3944	-2.742	480	3212	552	3392	0
1	16	8	"TAT2"	"YOL020W"	5050	15500	130	2006	1887	848	93	101	45	100	100	0	7396	6205	3587	38	40	23	100	100	0	0.260	0.291	0.290	0.372	1.978	0.258	0.889	120	625	9271	7961	-1.943	1913	7358	1794	6167	0
1	17	8	"SPE2"	"YOL052C"	5270	15490	130	1123	1034	443	95	100	36	97	96	0	5343	4655	2602	39	41	24	100	100	0	0.194	0.203	0.198	0.231	1.744	0.182	0.864	120	617	6332	5555	-2.367	1028	5304	939	4616	0
1	18	8	"YOL084W"	"YOL084W"	5460	15490	120	672	743	363	95	101	33	100	97	0	3575	3823	2428	39	43	26	100	99	0	0.163	0.171	0.168	0.194	2.040	0.149	0.814	120	540	4113	4432	-2.615	577	3536	648	3784	0
1	19	8	"YOL022C"	"YOL022C"	5650	15480	120	7071	6399	2362	94	99	34	100	100	0	4397	3674	1662	39	43	31	100	100	0	1.601	1.735	1.663	1.842	1.758	1.716	0.884	120	543	11335	9940	0.679	6977	4358	6305	3635	0
1	20	8	"YOL053W"	"YOL053W"	5860	15480	130	3492	3222	1209	94	98	32	100	100	0	7555	6297	3351	40	44	30	100	100	0	0.452	0.500	0.474	0.583	1.693	0.432	0.870	120	611	10913	9385	-1.145	3398	7515	3128	6257	0
1	21	8	"ADH1"	"YOL086C"	6060	15480	120	740	786	364	93	96	30	100	99	0	4085	3723	1994	39	41	22	100	100	0	0.160	0.188	0.187	0.208	1.759	0.172	0.842	120	602	4693	4377	-2.645	647	4046	693	3684	0
1	1	9	"RPL33B"	"YOR234C"	2060	15680	140	1767	1807	992	93	99	52	99	98	0	2159	2168	1331	49	53	44	98	96	0	0.793	0.809	0.784	0.902	1.851	0.768	0.867	156	752	3784	3833	-0.334	1674	2110	1714	2119	0
1	2	9	"PNT1"	"YOR266W"	2250	15690	120	350	380	227	93	97	57	80	75	0	463	464	329	43	47	26	89	80	0	0.612	0.682	0.639	0.683	2.339	0.705	0.650	120	464	677	708	-0.709	257	420	287	421	0
1	3	9	"YOR298W"	"YOR298W"	2430	15680	120	203	214	78	91	96	44	83	62	0	349	359	169	42	43	23	98	95	0	0.365	0.388	0.387	0.380	2.432	0.362	0.620	120	540	419	440	-1.455	112	307	123	317	0
1	4	9	"DFR1"	"YOR236W"	2660	15680	130	388	416	190	91	97	47	93	85	0	1767	1962	1184	41	43	26	100	100	0	0.172	0.169	0.168	0.184	1.944	0.153	0.789	120	627	2023	2246	-2.539	297	1726	325	1921	0
1	5	9	"YOR268C"	"YOR268C"	2860	15680	120	240	266	104	91	95	34	95	89	0	1112	1057	524	40	45	33	100	98	0	0.139	0.172	0.169	0.182	2.111	0.153	0.644	120	548	1221	1192	-2.847	149	1072	175	1017	0
1	6	9	"YOR300W"	"YOR300W"	3030	15710	110	272	269	117	91	98	36	87	77	0	708	689	460	41	56	69	87	81	0	0.271	0.275	0.287	0.327	2.314	0.236	0.726	80	463	848	826	-1.882	181	667	178	648	0
1	7	9	"YOR238W"	"YOR238W"	3270	15680	130	398	405	184	91	97	36	95	89	0	2107	2094	1209	41	49	54	98	96	0	0.149	0.153	0.149	0.168	1.985	0.138	0.808	120	615	2373	2367	-2.751	307	2066	314	2053	0
1	8	9	"VPH1"	"YOR270C"	3430	15700	110	717	742	365	94	107	71	93	91	0	1156	1178	797	42	64	128	92	78	0	0.559	0.570	0.528	0.677	2.041	0.485	0.827	80	518	1737	1784	-0.838	623	1114	648	1136	0
1	9	9	"YOR302W"	"YOR302W"	3660	15680	100	183	187	72	91	100	64	66	25	0	538	450	269	39	50	86	82	72	0	0.184	0.234	0.220	0.244	2.992	0.169	0.254	80	442	591	507	-2.439	92	499	96	411	0
1	10	9	"YOR240W"	"YOR240W"	3840	15690	130	538	560	292	92	97	46	95	90	0	2218	2124	1415	38	40	22	98	95	0	0.205	0.224	0.226	0.272	2.081	0.206	0.872	120	563	2626	2554	-2.289	446	2180	468	2086	0
1	11	9	"YTM1"	"YOR272W"	4030	15680	130	968	1092	738	94	98	35	97	97	0	1647	1729	1189	38	41	22	98	95	0	0.543	0.590	0.574	0.626	2.017	0.575	0.844	120	680	2483	2689	-0.880	874	1609	998	1691	0
1	12	9	"YOR304C-A"	"YOR304C-A"	4260	15680	130	2363	2117	988	95	99	32	100	100	0	1952	1674	961	39	42	23	100	99	0	1.186	1.237	1.226	1.383	1.598	1.144	0.907	120	601	4181	3657	0.246	2268	1913	2022	1635	0
1	13	9	"GRE1"	"YPL223C"	4450	15690	130	1162	1021	406	95	97	30	98	97	0	4566	3660	1797	39	41	22	100	99	0	0.236	0.256	0.247	0.274	1.677	0.237	0.892	120	553	5594	4547	-2.085	1067	4527	926	3621	0
1	14	9	"BBP1"	"YPL255W"	4660	15680	120	1717	1678	587	93	97	37	100	100	0	7130	6424	2854	38	38	17	100	100	0	0.229	0.248	0.241	0.271	1.706	0.226	0.888	120	529	8716	7971	-2.127	1624	7092	1585	6386	0
1	15	9	"YPR004C"	"YPR004C"	4850	15680	130	1747	1887	1061	94	99	37	100	100	0	2834	2610	1570	38	38	18	100	100	0	0.591	0.697	0.682	0.788	1.863	0.662	0.854	120	545	4449	4365	-0.758	1653	2796	1793	2572	0
1	16	9	"YPL225W"	"YPL225W"	5050	15690	140	3553	3066	1419	93	99	40	100	98	0	2543	2097	1272	38	40	23	96	95	0	1.381	1.444	1.345	1.783	2.141	1.351	0.892	156	656	5965	5032	0.466	3460	2505	2973	2059	0
1	17	9	"YPL257W"	"YPL257W"	5260	15690	140	1884	1722	861	94	99	41	99	98	0	2956	2686	1689	39	41	22	98	98	0	0.614	0.615	0.586	0.735	2.423	0.555	0.847	156	628	4707	4275	-0.705	1790	2917	1628	2647	0
1	18	9	"ICL2"	"YPR006C"	5430	15690	120	2928	2789	1471	96	101	33	100	99	0	4241	4125	2469	40	42	24	99	99	0	0.674	0.659	0.641	0.776	1.950	0.618	0.858	120	497	7033	6778	-0.569	2832	4201	2693	4085	0
1	19	9	"ALG5"	"YPL227C"	5630	15690	130	3186	2845	1206	96	101	35	100	99	0	4891	4170	2139	39	44	76	99	99	0	0.637	0.665	0.643	0.740	1.567	0.637	0.865	120	662	7942	6880	-0.651	3090	4852	2749	4131	0
1	20	9	"APM1"	"YPL259C"	5870	15680	130	3618	3197	1600	96	99	33	100	100	0	5186	4467	2838	38	44	77	98	97	0	0.684	0.700	0.700	0.860	1.769	0.642	0.887	120	655	8670	7530	-0.548	3522	5148	3101	4429	0
1	21	9	"YPR008W"	"YPR008W"	6050	15690	130	4357	4885	2870	96	99	30	100	100	0	4950	4957	2869	40	43	23	99	99	0	0.868	0.974	0.983	1.114	1.820	0.977	0.904	120	687	9171	9706	-0.205	4261	4910	4789	4917	0
1	1	10	"YPL229W"	"YPL229W"	2040	15890	120	1494	1361	600	94	98	34	98	96	0	5062	4154	2241	50	52	31	100	100	0	0.279	0.309	0.295	0.348	1.884	0.281	0.880	120	651	6412	5371	-1.840	1400	5012	1267	4104	0
1	2	10	"YPL261C"	"YPL261C"	2260	15880	130	571	531	203	91	97	41	98	96	0	1899	1644	713	45	52	52	99	99	0	0.259	0.275	0.264	0.290	1.708	0.260	0.846	120	641	2334	2039	-1.950	480	1854	440	1599	0
1	3	10	"RPA135"	"YPR010C"	2460	15880	130	2414	2874	1696	92	99	52	100	99	0	4462	4562	2533	42	46	27	98	98	0	0.525	0.615	0.609	0.662	1.916	0.623	0.906	120	560	6742	7302	-0.929	2322	4420	2782	4520	0
1	4	10	"SEC7"	"YDR170C"	2630	15880	150	111	126	67	91	99	70	21	7	0	67	92	97	41	44	24	51	34	0	0.769	0.686	0.803	0.849	3.757	2.667	0.083	156	748	46	86	-0.379	20	26	35	51	-50
1	5	10	"YRF1-1"	"YDR545W"	2840	15890	80	168	489	1450	94	106	98	46	23	0	86	136	137	40	44	25	69	48	0	1.609	4.115	1.458	1.453	3.349	11.299	0.456	52	326	120	491	0.686	74	46	395	96	-100
1	6	10	"SWI4"	"YER111C"	3030	15880	150	103	128	136	93	102	58	15	7	0	54	70	71	41	47	46	20	8	0	0.769	1.207	1.199	1.120	3.622	5.435	0.066	156	707	23	64	-0.379	10	13	35	29	-50
1	7	10	"ESP1"	"YGR098C"	3230	15880	150	113	125	68	91	95	36	34	17	0	51	60	41	39	43	33	28	11	0	1.833	1.619	1.205	1.165	3.801	3.257	0.089	156	695	34	55	0.874	22	12	34	21	-50
1	8	10	"RIM101"	"YHL027W"	3430	15900	100	136	159	95	94	98	33	58	35	0	119	168	177	40	42	28	80	66	0	0.532	0.508	0.667	0.609	2.713	0.460	0.437	80	430	121	193	-0.911	42	79	65	128	0
1	9	10	"MIP6"	"YHR015W"	3630	15880	150	98	114	59	92	100	62	15	3	0	48	56	36	40	49	92	5	0	0	0.750	1.375	1.119	1.165	4.010	10.240	0.026	156	735	14	38	-0.415	6	8	22	16	-50
1	10	10	"VTH1"	"YIL173W"	3830	15880	150	109	136	142	90	97	53	23	8	0	53	74	76	38	40	19	42	26	0	1.267	1.278	1.400	1.325	4.227	5.186	0.076	156	703	34	82	0.341	19	15	46	36	-50
1	11	10	"YJR029W"	"YJR029W"	4040	15880	80	164	185	95	92	98	42	63	46	0	130	146	100	40	44	27	76	63	0	0.800	0.877	1.012	0.934	2.963	0.941	0.355	52	326	162	199	-0.322	72	90	93	106	0
1	12	10	"YLL034C"	"YLL034C"	4230	15880	150	99	116	58	93	98	38	26	12	0	46	52	35	39	42	23	25	12	0	0.857	1.769	1.305	1.039	3.803	3.890	0.093	156	743	13	36	-0.222	6	7	23	13	-50
1	13	10	"ESC1"	"YMR219W"	4430	15880	150	105	132	147	94	101	65	14	7	0	51	67	65	39	42	29	25	15	0	0.917	1.357	1.316	1.305	3.619	4.413	0.138	156	661	23	66	-0.126	11	12	38	28	-50
1	14	10	"YKU70"	"YMR284W"	4630	15880	150	110	122	68	93	97	33	34	14	0	48	69	104	39	41	31	25	10	0	1.889	0.967	1.357	1.469	3.588	0.482	0.132	156	654	26	59	0.918	17	9	29	30	-50
1	15	10	"POL1"	"YNL102W"	4830	15880	150	107	122	69	94	100	38	26	10	0	46	58	51	39	42	34	19	6	0	1.857	1.474	1.111	1.322	3.353	1.727	0.105	156	699	20	47	0.893	13	7	28	19	-50
1	16	10	"YMRWdelta20"	"YMRWdelta20"	5040	15890	130	451	440	137	93	97	32	100	100	0	1348	1169	514	37	40	28	100	99	0	0.273	0.307	0.302	0.338	1.790	0.265	0.674	120	597	1669	1479	-1.873	358	1311	347	1132	0
1	17	10	"IntYNL112W"	"IntYNL112W"	5250	15890	130	675	720	321	92	96	34	100	99	0	1542	1629	940	38	40	21	100	100	0	0.388	0.395	0.398	0.441	1.696	0.357	0.875	120	637	2087	2219	-1.367	583	1504	628	1591	0
1	18	10	"CEN14"	"CEN14"	5470	15890	120	228	238	89	94	97	37	90	74	0	227	224	102	37	40	21	94	93	0	0.705	0.770	0.720	0.757	2.300	0.815	0.584	120	576	324	331	-0.504	134	190	144	187	0
1	19	10	"YORCdelta11"	"YORCdelta11"	5660	15880	120	485	467	174	97	102	43	96	90	0	1453	1420	674	37	42	55	97	95	0	0.274	0.268	0.267	0.280	1.794	0.240	0.783	120	517	1804	1753	-1.868	388	1416	370	1383	0
1	20	10	"YORWdelta16"	"YORWdelta16"	5850	15890	120	607	570	253	99	104	43	97	93	0	773	725	445	38	43	54	95	90	0	0.691	0.686	0.675	0.807	2.156	0.624	0.821	120	591	1243	1158	-0.533	508	735	471	687	0
1	21	10	"YOR298C-A"	"YOR298C-A"	6060	15880	110	331	349	158	97	102	36	91	90	0	990	888	527	37	40	21	96	96	0	0.246	0.296	0.288	0.347	2.503	0.256	0.693	80	539	1187	1103	-2.026	234	953	252	851	0
1	1	11	"YPLCdelta10"	"YPLCdelta10"	2040	16090	120	1331	1309	486	91	96	31	100	100	0	1794	1651	783	51	55	55	100	99	0	0.711	0.761	0.720	0.805	1.563	0.693	0.792	120	609	2983	2818	-0.491	1240	1743	1218	1600	0
1	2	11	"YPRCdelta13"	"YPRCdelta13"	2240	16090	130	1600	1527	663	94	99	40	100	99	0	2011	1822	938	44	51	52	97	96	0	0.766	0.806	0.782	0.936	1.812	0.756	0.862	120	611	3473	3211	-0.385	1506	1967	1433	1778	0
1	3	11	"SNR51"	"SNR51"	2440	16090	120	210	221	73	94	98	42	89	70	0	680	621	281	42	45	30	96	95	0	0.182	0.219	0.195	0.214	2.269	0.179	0.503	120	588	754	706	-2.459	116	638	127	579	0
1	4	11	"iYAL068C-0"	"iYAL068C-0"	2650	16080	120	466	458	195	91	95	41	99	96	0	762	812	467	40	43	23	97	95	0	0.519	0.475	0.492	0.545	2.202	0.418	0.739	120	572	1097	1139	-0.945	375	722	367	772	0
1	5	11	"iYAL067C"	"iYAL067C"	2850	16090	120	426	405	148	93	100	59	95	85	0	3135	2796	1287	40	43	25	100	99	0	0.108	0.113	0.112	0.124	1.974	0.101	0.772	120	618	3428	3068	-3.216	333	3095	312	2756	0
1	6	11	"iYAL064C-A-0"	"iYAL064C-A-0"	3070	16080	130	3616	3384	1618	92	98	50	100	100	0	6329	5969	2935	40	43	26	100	100	0	0.560	0.555	0.537	0.590	1.694	0.541	0.874	120	597	9813	9221	-0.836	3524	6289	3292	5929	0
1	7	11	"iYBR065C"	"iYBR065C"	3270	16080	130	408	406	138	88	92	34	100	96	0	2374	2109	1014	38	41	27	100	99	0	0.137	0.154	0.157	0.175	1.847	0.130	0.739	120	575	2656	2389	-2.868	320	2336	318	2071	0
1	8	11	"iYBR069C"	"iYBR069C"	3460	16080	130	639	679	295	90	94	34	100	97	0	2115	1989	924	39	41	23	100	99	0	0.264	0.302	0.308	0.323	1.688	0.289	0.858	120	618	2625	2539	-1.919	549	2076	589	1950	0
1	9	11	"iYBR073W"	"iYBR073W"	3670	16080	130	488	508	210	90	96	45	99	96	0	1280	1208	586	39	40	18	100	99	0	0.321	0.358	0.356	0.378	1.660	0.331	0.837	120	586	1639	1587	-1.641	398	1241	418	1169	0
1	10	11	"iYBR085W-1"	"iYBR085W-1"	3860	16080	130	934	957	482	87	93	44	99	96	0	2066	1858	951	38	38	18	99	99	0	0.418	0.478	0.477	0.511	2.277	0.457	0.805	120	584	2875	2690	-1.260	847	2028	870	1820	0
1	11	11	"iYBR089W"	"iYBR089W"	4060	16090	130	2311	2511	1313	88	95	41	100	100	0	4883	4728	2322	39	41	24	100	100	0	0.459	0.517	0.501	0.537	1.559	0.503	0.896	120	626	7067	7112	-1.124	2223	4844	2423	4689	0
1	12	11	"iYBR093C"	"iYBR093C"	4250	16090	120	337	351	146	93	104	78	88	80	0	1413	1314	685	40	42	30	99	96	0	0.178	0.203	0.195	0.217	2.142	0.180	0.704	120	540	1617	1532	-2.492	244	1373	258	1274	0
1	13	11	"iYBR111C"	"iYBR111C"	4470	16090	130	2429	2217	1006	93	103	73	99	98	0	4486	4102	2374	40	42	30	99	99	0	0.525	0.523	0.524	0.587	1.575	0.459	0.849	120	552	6782	6186	-0.928	2336	4446	2124	4062	0
1	14	11	"iYBR117C"	"iYBR117C"	4650	16090	120	1313	1248	523	94	102	54	99	98	0	4961	4383	1863	40	42	33	100	100	0	0.248	0.266	0.269	0.272	1.616	0.257	0.858	120	490	6140	5497	-2.013	1219	4921	1154	4343	0
1	15	11	"iYBR121C"	"iYBR121C"	4840	16090	120	974	925	342	94	102	54	99	98	0	3882	3393	1642	38	42	37	99	99	0	0.229	0.248	0.238	0.273	1.681	0.220	0.848	120	569	4724	4186	-2.127	880	3844	831	3355	0
1	16	11	"iYBR139W"	"iYBR139W"	5070	16080	130	908	870	279	91	98	34	100	100	0	951	821	348	38	41	28	98	97	0	0.895	0.995	0.964	1.091	1.682	0.950	0.875	120	624	1730	1562	-0.160	817	913	779	783	0
1	17	11	"iYBR143C"	"iYBR143C"	5250	16090	130	542	542	207	91	96	35	100	99	0	2003	2003	978	38	41	28	100	100	0	0.230	0.230	0.227	0.245	1.625	0.189	0.757	120	600	2416	2416	-2.123	451	1965	451	1965	0
1	18	11	"iYBR147W"	"iYBR147W"	5460	16090	130	604	619	322	92	96	37	100	99	0	1702	1575	773	37	39	18	100	100	0	0.308	0.343	0.307	0.355	1.898	0.295	0.644	120	615	2177	2065	-1.701	512	1665	527	1538	0
1	19	11	"iYDL240W"	"iYDL240W"	5660	16080	130	1162	1117	480	96	99	42	100	100	0	986	966	423	38	46	106	97	92	0	1.124	1.100	1.137	1.119	1.567	1.128	0.858	120	636	2014	1949	0.169	1066	948	1021	928	0
1	20	11	"iYDL236W"	"iYDL236W"	5860	16090	120	309	311	98	95	99	35	98	94	0	732	661	315	38	39	19	98	98	0	0.308	0.347	0.351	0.377	1.828	0.295	0.703	120	559	908	839	-1.697	214	694	216	623	0
1	21	11	"iYDL232W"	"iYDL232W"	6070	16080	130	723	716	283	97	103	48	100	98	0	1771	1802	909	38	40	23	100	100	0	0.361	0.351	0.354	0.378	1.607	0.313	0.841	120	725	2359	2383	-1.469	626	1733	619	1764	0
1	1	12	"iYDL216C"	"iYDL216C"	2060	16280	120	229	229	82	91	95	30	90	77	0	1058	910	462	49	51	28	96	92	0	0.137	0.160	0.157	0.167	2.274	0.137	0.605	120	611	1147	999	-2.870	138	1009	138	861	0
1	2	12	"iYDL212W"	"iYDL212W"	2250	16280	130	357	367	155	90	94	32	96	88	0	1500	1515	896	44	46	24	98	98	0	0.183	0.188	0.177	0.206	2.081	0.162	0.747	120	598	1723	1748	-2.447	267	1456	277	1471	0
1	3	12	"itG(GCC)D1"	"itG(GCC)D1"	2450	16290	120	1739	1594	797	91	97	33	99	99	0	2664	2457	1380	41	44	24	99	98	0	0.628	0.622	0.626	0.687	1.807	0.591	0.890	120	593	4271	3919	-0.671	1648	2623	1503	2416	0
1	4	12	"iYDL195W"	"iYDL195W"	2650	16290	120	589	601	256	91	96	32	98	96	0	1667	1515	767	40	44	31	100	100	0	0.306	0.346	0.331	0.355	1.810	0.310	0.787	120	548	2125	1985	-1.708	498	1627	510	1475	0
1	5	12	"iYDL191W"	"iYDL191W"	2840	16290	130	1227	1310	668	91	95	39	100	100	0	1403	1397	793	39	43	33	98	97	0	0.833	0.898	0.870	0.985	1.677	0.873	0.865	120	626	2500	2577	-0.264	1136	1364	1219	1358	0
1	6	12	"iYDL186W"	"iYDL186W"	3070	16270	130	502	500	207	91	96	39	98	97	0	1562	1641	1034	39	42	27	100	99	0	0.270	0.255	0.260	0.296	1.862	0.196	0.699	120	640	1934	2011	-1.890	411	1523	409	1602	0
1	7	12	"iYDL170W"	"iYDL170W"	3250	16280	120	617	577	249	89	93	33	98	95	0	2089	1680	910	38	42	27	99	99	0	0.257	0.297	0.289	0.334	1.837	0.265	0.804	120	560	2579	2130	-1.958	528	2051	488	1642	0
1	8	12	"iYDL166C"	"iYDL166C"	3460	16280	110	317	325	176	89	93	33	93	88	0	599	541	331	39	42	23	95	91	0	0.407	0.470	0.444	0.516	2.437	0.443	0.665	80	494	788	738	-1.296	228	560	236	502	0
1	9	12	"iYDL160C"	"iYDL160C"	3630	16280	120	560	541	187	92	95	31	99	98	0	3276	2891	1232	38	40	21	100	100	0	0.145	0.157	0.152	0.166	2.003	0.143	0.795	120	556	3706	3302	-2.791	468	3238	449	2853	0
1	10	12	"iYDR141C"	"iYDR141C"	3840	16280	130	313	334	171	93	97	36	95	88	0	1981	1837	983	38	39	19	99	96	0	0.113	0.134	0.123	0.146	2.585	0.105	0.509	120	660	2163	2040	-3.143	220	1943	241	1799	0
1	11	12	"iYDR145W"	"iYDR145W"	4060	16280	130	243	248	95	90	93	33	91	78	0	397	417	231	39	40	20	93	92	0	0.427	0.418	0.387	0.424	2.675	0.372	0.614	120	623	511	536	-1.226	153	358	158	378	0
1	12	12	"iYDR150W"	"iYDR150W"	4270	16280	140	2111	1898	946	91	97	39	99	99	0	1746	1529	901	39	41	21	99	98	0	1.183	1.213	1.195	1.387	2.008	1.180	0.838	156	639	3727	3297	0.243	2020	1707	1807	1490	0
1	13	12	"iYDR169C-0"	"iYDR169C-0"	4450	16280	120	640	666	362	96	100	38	98	94	0	1648	1570	967	41	42	22	99	98	0	0.339	0.373	0.398	0.409	2.047	0.343	0.793	120	446	2151	2099	-1.563	544	1607	570	1529	0
1	14	12	"iYDR170W-A-0"	"iYDR170W-A-0"	4610	16270	130	8953	10966	8171	94	100	37	100	100	0	19760	22235	15998	41	43	28	100	100	0	0.449	0.490	0.489	0.530	1.913	0.480	0.876	120	586	28578	33066	-1.154	8859	19719	10872	22194	0
1	15	12	"iYDR173C"	"iYDR173C"	4860	16280	120	622	598	355	91	99	51	93	85	0	1917	1909	1366	39	42	29	97	92	0	0.283	0.271	0.277	0.321	2.160	0.242	0.794	120	575	2409	2377	-1.822	531	1878	507	1870	0
1	16	12	"iYDR189W"	"iYDR189W"	5030	16290	130	1079	1188	566	91	96	33	100	100	0	1075	1062	596	38	39	18	99	99	0	0.953	1.071	1.071	1.202	1.736	1.024	0.874	120	561	2025	2121	-0.070	988	1037	1097	1024	0
1	17	12	"iYDR194C"	"iYDR194C"	5220	16290	130	640	694	357	93	98	34	100	97	0	2425	2373	1519	39	41	28	98	98	0	0.229	0.257	0.242	0.289	1.920	0.229	0.838	120	597	2933	2935	-2.125	547	2386	601	2334	0
1	18	12	"iYDR198C"	"iYDR198C"	5450	16280	130	698	657	229	94	97	31	99	97	0	2824	2344	1120	37	44	93	100	99	0	0.217	0.244	0.239	0.265	1.609	0.218	0.855	120	663	3391	2870	-2.206	604	2787	563	2307	0
1	19	12	"iYDR214W"	"iYDR214W"	5650	16280	110	168	184	84	95	97	30	78	57	0	253	238	114	38	45	104	76	52	0	0.340	0.445	0.366	0.403	3.090	0.182	0.145	80	524	288	289	-1.558	73	215	89	200	0
1	20	12	"iYDR218C"	"iYDR218C"	5850	16280	130	443	446	198	95	98	32	94	89	0	2022	2050	1339	38	41	30	97	96	0	0.175	0.174	0.174	0.209	2.080	0.149	0.812	120	619	2332	2363	-2.511	348	1984	351	2012	0
1	21	12	"iYDR223W"	"iYDR223W"	6040	16280	130	279	285	140	93	101	48	84	69	0	1035	1107	706	39	42	32	96	95	0	0.187	0.180	0.169	0.183	2.540	0.154	0.605	120	679	1182	1260	-2.421	186	996	192	1068	0
1	1	13	"iYDR532C"	"iYDR532C"	2040	16490	120	159	187	126	92	97	38	75	40	0	257	279	188	49	51	31	91	80	0	0.322	0.413	0.341	0.377	2.792	0.383	0.254	120	652	275	325	-1.634	67	208	95	230	0
1	2	13	"iYDR535C"	"iYDR535C"	2260	16490	130	754	683	324	93	96	42	95	90	0	2988	2404	1394	45	48	31	99	98	0	0.225	0.250	0.246	0.282	2.003	0.233	0.852	120	628	3604	2949	-2.155	661	2943	590	2359	0
1	3	13	"iYDR539W-1"	"iYDR539W-1"	2420	16490	90	164	180	83	91	95	32	75	55	0	174	196	110	42	46	28	90	84	0	0.553	0.578	0.533	0.537	2.241	0.558	0.333	52	365	205	243	-0.855	73	132	89	154	0
1	4	13	"iYEL073C-4"	"iYEL073C-4"	2650	16470	110	159	251	453	91	97	40	71	45	0	300	374	351	41	46	32	93	88	0	0.263	0.480	0.367	0.409	3.197	0.988	0.431	80	520	327	493	-1.929	68	259	160	333	0
1	5	13	"iYEL071W-1"	"iYEL071W-1"	2850	16480	130	388	417	186	91	95	40	92	90	0	2158	1955	1094	39	45	40	97	95	0	0.140	0.170	0.156	0.186	2.204	0.154	0.778	120	602	2416	2242	-2.835	297	2119	326	1916	0
1	6	13	"iYEL068C"	"iYEL068C"	3050	16490	130	668	645	362	89	93	35	92	86	0	807	960	713	39	41	32	94	89	0	0.754	0.604	0.568	0.702	2.190	0.537	0.829	120	643	1347	1477	-0.408	579	768	556	921	0
1	7	13	"iYEL051W"	"iYEL051W"	3250	16480	130	440	457	211	89	94	35	96	93	0	1725	1514	849	40	43	41	98	97	0	0.208	0.250	0.253	0.270	1.886	0.219	0.760	120	629	2036	1842	-2.263	351	1685	368	1474	0
1	8	13	"itG(GCC)E"	"itG(GCC)E"	3460	16490	120	360	394	277	90	96	35	93	85	0	489	480	299	38	41	41	93	88	0	0.599	0.688	0.585	0.652	2.261	0.747	0.605	120	557	721	746	-0.740	270	451	304	442	0
1	9	13	"iYEL047C"	"iYEL047C"	3650	16490	140	479	490	204	90	95	31	98	94	0	2099	1937	1085	37	39	18	99	99	0	0.189	0.211	0.210	0.235	1.905	0.186	0.800	156	651	2451	2300	-2.406	389	2062	400	1900	0
1	10	13	"iYEL029C"	"iYEL029C"	3870	16480	130	1965	1737	718	92	99	47	99	97	0	5292	4145	2190	38	43	62	98	98	0	0.356	0.401	0.378	0.463	2.047	0.361	0.868	120	578	7127	5752	-1.488	1873	5254	1645	4107	0
1	11	13	"iYEL027W"	"iYEL027W"	4050	16490	140	1479	1393	683	88	94	42	100	97	0	2084	1923	1209	38	43	58	96	94	0	0.680	0.692	0.644	0.807	2.118	0.616	0.829	156	672	3437	3190	-0.557	1391	2046	1305	1885	0
1	12	13	"iYEL023C"	"iYEL023C"	4270	16480	120	1035	918	511	89	97	45	95	93	0	4233	3650	2481	39	41	22	100	98	0	0.226	0.230	0.226	0.281	1.863	0.213	0.861	120	555	5140	4440	-2.148	946	4194	829	3611	0
1	13	13	"iYFL031W"	"iYFL031W"	4460	16490	120	834	803	394	96	102	46	97	94	0	2177	1882	1107	41	43	24	100	99	0	0.346	0.384	0.380	0.422	1.970	0.361	0.839	120	543	2874	2548	-1.533	738	2136	707	1841	0
1	14	13	"iYFL027C"	"iYFL027C"	4650	16490	130	1149	1080	478	93	99	35	100	99	0	4254	3384	1643	39	42	24	100	100	0	0.251	0.295	0.275	0.316	1.664	0.276	0.849	120	600	5271	4332	-1.997	1056	4215	987	3345	0
1	15	13	"iYFL023W"	"iYFL023W"	4830	16490	130	850	766	302	92	98	34	100	96	0	851	747	376	38	42	30	97	97	0	0.932	0.951	0.940	1.020	1.697	0.884	0.823	120	645	1571	1383	-0.101	758	813	674	709	0
1	16	13	"iYFL009W"	"iYFL009W"	5070	16480	130	200	215	88	92	97	30	88	72	0	395	410	215	38	41	28	100	95	0	0.303	0.331	0.313	0.309	2.079	0.313	0.615	120	547	465	495	-1.725	108	357	123	372	0
1	17	13	"iYFL005W"	"iYFL005W"	5240	16490	140	2640	2596	1266	93	97	30	100	100	0	3220	2849	1616	38	40	19	98	97	0	0.800	0.890	0.852	1.054	2.124	0.842	0.855	156	616	5729	5314	-0.321	2547	3182	2503	2811	0
1	18	13	"iYFLWdelta5"	"iYFLWdelta5"	5450	16480	130	1565	1407	623	94	99	34	99	97	0	1384	1218	668	37	40	22	100	99	0	1.092	1.112	1.124	1.164	1.597	1.112	0.862	120	628	2818	2494	0.127	1471	1347	1313	1181	0
1	19	13	"iYFR009W"	"iYFR009W"	5650	16490	130	1610	1559	521	94	101	72	100	100	0	2370	2143	859	38	40	22	100	100	0	0.650	0.696	0.673	0.746	1.500	0.673	0.914	120	616	3848	3570	-0.621	1516	2332	1465	2105	0
1	20	13	"iYFR012W"	"iYFR012W"	5840	16490	130	3645	3728	2084	95	103	73	100	100	0	3552	3611	2302	38	43	51	99	99	0	1.010	1.017	1.052	1.140	1.635	0.974	0.873	120	603	7064	7206	0.015	3550	3514	3633	3573	0
1	21	13	"iYFR016C"	"iYFR016C"	6050	16480	130	481	469	222	95	103	53	95	85	0	1495	1397	768	38	43	50	100	98	0	0.265	0.275	0.275	0.288	1.654	0.258	0.834	120	699	1843	1733	-1.916	386	1457	374	1359	0
1	1	14	"iYFR027W"	"iYFR027W"	2050	16680	130	522	531	258	92	97	34	95	93	0	1453	1441	851	49	49	29	98	97	0	0.306	0.315	0.316	0.336	2.193	0.278	0.779	120	647	1834	1831	-1.707	430	1404	439	1392	0
1	2	14	"iYFR030W"	"iYFR030W"	2250	16690	140	1182	1046	502	93	97	39	98	95	0	776	666	373	44	47	33	94	91	0	1.488	1.532	1.525	1.735	1.809	1.510	0.881	156	652	1821	1575	0.573	1089	732	953	622	0
1	3	14	"iYFR032C-A"	"iYFR032C-A"	2460	16690	130	537	531	212	91	96	33	98	96	0	3136	2569	1326	43	48	35	100	99	0	0.144	0.174	0.170	0.193	1.785	0.154	0.832	120	618	3539	2966	-2.794	446	3093	440	2526	0
1	4	14	"iYGL002W"	"iYGL002W"	2660	16680	140	2453	2195	1035	93	98	38	99	99	0	1138	1081	605	42	48	37	98	94	0	2.153	2.023	2.056	2.250	1.894	1.994	0.891	156	677	3456	3141	1.107	2360	1096	2102	1039	0
1	5	14	"iYGR002C"	"iYGR002C"	2860	16680	140	2239	2174	1036	91	93	31	99	99	0	1527	1451	787	40	42	25	99	99	0	1.445	1.476	1.471	1.611	2.020	1.464	0.880	156	642	3635	3494	0.531	2148	1487	2083	1411	0
1	6	14	"iYGR006W"	"iYGR006W"	3070	16690	130	4416	3876	1774	90	94	33	100	100	0	3268	2936	1649	40	41	22	100	100	0	1.340	1.307	1.285	1.455	1.640	1.224	0.886	120	566	7554	6682	0.422	4326	3228	3786	2896	0
1	7	14	"iYGR026W"	"iYGR026W"	3250	16680	130	2633	2513	1059	91	96	37	100	100	0	1944	1758	908	40	43	40	100	100	0	1.335	1.410	1.387	1.547	1.542	1.360	0.888	120	596	4446	4140	0.417	2542	1904	2422	1718	0
1	8	14	"iYGR028W"	"iYGR028W"	3460	16680	130	2380	2019	1005	90	95	36	100	99	0	3031	2365	1375	38	42	40	99	98	0	0.765	0.829	0.828	0.916	1.845	0.815	0.897	120	590	5283	4256	-0.386	2290	2993	1929	2327	0
1	9	14	"iYGR030C"	"iYGR030C"	3660	16680	140	850	788	344	89	92	31	99	99	0	3806	3383	1829	37	39	21	100	100	0	0.202	0.209	0.212	0.229	1.695	0.190	0.873	156	625	4530	4045	-2.308	761	3769	699	3346	0
1	10	14	"iYGR043C-0"	"iYGR043C-0"	3850	16680	130	217	264	331	87	94	45	87	70	0	555	651	462	38	44	64	95	85	0	0.251	0.289	0.271	0.292	2.543	0.282	0.182	120	560	647	790	-1.992	130	517	177	613	0
1	11	14	"iYGR047C"	"iYGR047C"	4050	16690	140	1461	1553	889	88	95	45	100	98	0	2431	2259	1378	37	42	59	96	94	0	0.574	0.659	0.698	0.783	2.155	0.622	0.821	156	675	3767	3687	-0.802	1373	2394	1465	2222	0
1	12	14	"iYGR051C"	"iYGR051C"	4270	16690	120	630	593	214	89	94	36	100	97	0	2581	2295	1026	37	39	18	100	100	0	0.213	0.223	0.224	0.233	1.564	0.205	0.881	120	572	3085	2762	-2.233	541	2544	504	2258	0
1	13	14	"iYGR067C"	"iYGR067C"	4460	16690	130	237	248	141	93	98	40	85	72	0	427	457	267	38	40	22	95	92	0	0.370	0.370	0.312	0.352	2.168	0.335	0.454	120	549	533	574	-1.434	144	389	155	419	0
1	14	14	"iYGR072W"	"iYGR072W"	4640	16690	130	231	229	93	92	99	38	80	71	0	309	310	182	38	41	24	89	87	0	0.513	0.504	0.516	0.528	2.228	0.436	0.528	120	611	410	409	-0.963	139	271	137	272	0
1	15	14	"iYGR078C"	"iYGR078C"	4870	16680	120	297	316	130	93	102	56	95	82	0	1355	1430	711	39	43	27	100	100	0	0.155	0.160	0.152	0.161	1.729	0.143	0.628	120	572	1520	1614	-2.690	204	1316	223	1391	0
1	16	14	"iYHR009C"	"iYHR009C"	5070	16680	140	347	348	142	92	99	52	93	85	0	1490	1406	800	37	41	25	97	94	0	0.175	0.187	0.196	0.209	2.286	0.163	0.694	156	605	1708	1625	-2.510	255	1453	256	1369	0
1	17	14	"iYHR013C"	"iYHR013C"	5270	16690	130	1883	1839	737	92	95	31	100	100	0	2000	1780	886	37	39	18	100	100	0	0.912	1.002	0.968	1.116	1.595	0.965	0.892	120	504	3754	3490	-0.132	1791	1963	1747	1743	0
1	18	14	"iYHRWdelta7"	"iYHRWdelta7"	5450	16690	130	405	405	154	92	96	33	95	90	0	619	600	307	38	39	20	97	94	0	0.539	0.557	0.579	0.596	1.643	0.500	0.792	120	553	894	875	-0.892	313	581	313	562	0
1	19	14	"iYHR027C"	"iYHR027C"	5670	16690	140	381	377	140	93	98	41	97	92	0	1376	1252	692	37	38	19	98	98	0	0.215	0.234	0.238	0.268	2.047	0.201	0.757	156	605	1627	1499	-2.217	288	1339	284	1215	0
1	20	14	"iYHR031C"	"iYHR031C"	5870	16690	140	278	293	116	95	101	43	94	89	0	1250	1122	529	38	41	48	94	93	0	0.151	0.183	0.165	0.202	2.481	0.152	0.580	156	620	1395	1282	-2.727	183	1212	198	1084	0
1	21	14	"iYHR035W"	"iYHR035W"	6080	16670	130	415	426	159	94	99	33	97	96	0	2130	2019	1017	38	38	18	100	100	0	0.153	0.168	0.166	0.180	1.921	0.150	0.790	120	678	2413	2313	-2.704	321	2092	332	1981	0
1	1	15	"iYHR048W"	"iYHR048W"	2070	16870	130	214	233	103	89	94	34	93	80	0	619	662	353	45	47	28	100	98	0	0.218	0.233	0.224	0.241	2.231	0.190	0.478	120	662	699	761	-2.199	125	574	144	617	0
1	2	15	"iYHR052W"	"iYHR052W"	2260	16880	130	2240	2155	1152	88	93	31	100	99	0	4061	3836	2078	42	44	24	100	100	0	0.535	0.545	0.533	0.582	1.797	0.532	0.856	120	578	6171	5861	-0.901	2152	4019	2067	3794	0
1	3	15	"iYHR056C"	"iYHR056C"	2470	16880	130	945	932	388	91	96	31	99	99	0	2496	2487	1209	44	49	36	100	100	0	0.348	0.344	0.331	0.360	1.785	0.321	0.847	120	559	3306	3284	-1.522	854	2452	841	2443	0
1	4	15	"itF(GAA)H1"	"itF(GAA)H1"	2650	16890	140	1100	1049	427	92	97	32	99	98	0	4545	3968	1939	44	48	35	98	98	0	0.224	0.244	0.242	0.283	2.181	0.222	0.859	156	606	5509	4881	-2.159	1008	4501	957	3924	0
1	5	15	"iYHR075C"	"iYHR075C"	2870	16880	140	2648	2530	1097	90	94	32	100	100	0	4292	3822	2022	41	42	21	100	100	0	0.602	0.645	0.607	0.723	1.874	0.592	0.839	156	678	6809	6221	-0.733	2558	4251	2440	3781	0
1	6	15	"iYHR079C"	"iYHR079C"	3070	16880	130	760	699	300	89	93	31	95	95	0	2661	2195	1152	38	40	22	99	99	0	0.256	0.283	0.270	0.301	1.926	0.252	0.811	120	558	3294	2767	-1.967	671	2623	610	2157	0
1	7	15	"iYIL013C"	"iYIL013C"	3260	16890	140	1413	1309	531	89	93	31	99	98	0	2374	2095	1056	39	41	23	99	97	0	0.567	0.593	0.565	0.692	2.308	0.542	0.849	156	624	3659	3276	-0.819	1324	2335	1220	2056	0
1	8	15	"iYIL009C-A"	"iYIL009C-A"	3460	16880	130	846	797	378	86	91	33	98	98	0	1110	1047	553	39	41	23	98	98	0	0.710	0.705	0.689	0.741	1.755	0.678	0.838	120	561	1831	1719	-0.495	760	1071	711	1008	0
1	9	15	"iYIL009W"	"iYIL009W"	3640	16890	130	3132	2983	1039	87	90	30	100	100	0	2979	2448	1215	39	40	22	98	98	0	1.036	1.202	1.107	1.459	2.323	1.091	0.807	120	579	5985	5305	0.051	3045	2940	2896	2409	0
1	10	15	"itE(UUC)I"	"itE(UUC)I"	3850	16880	130	465	456	180	86	91	35	100	95	0	643	600	309	39	41	23	98	95	0	0.627	0.660	0.647	0.713	2.072	0.605	0.760	120	609	983	931	-0.672	379	604	370	561	0
1	11	15	"iYIR010W"	"iYIR010W"	4050	16890	130	543	510	187	91	97	38	98	98	0	491	463	213	37	40	25	95	94	0	0.996	0.984	0.964	1.018	1.859	0.956	0.763	120	480	906	845	-0.006	452	454	419	426	0
1	12	15	"iYIR014W"	"iYIR014W"	4250	16890	130	447	423	162	92	93	31	99	91	0	1112	988	521	37	40	22	97	97	0	0.330	0.348	0.331	0.372	2.201	0.295	0.757	120	545	1430	1282	-1.598	355	1075	331	951	0
1	13	15	"iYIR026C"	"iYIR026C"	4470	16880	130	711	676	290	91	95	35	99	99	0	1031	1005	550	37	40	22	98	97	0	0.624	0.604	0.557	0.647	1.973	0.547	0.808	120	594	1614	1553	-0.681	620	994	585	968	0
1	14	15	"iYIR030C"	"iYIR030C"	4660	16870	110	871	836	402	93	110	94	95	88	0	1269	1067	661	38	54	121	87	85	0	0.632	0.722	0.733	0.908	2.467	0.622	0.783	80	459	2009	1772	-0.662	778	1231	743	1029	0
1	15	15	"iYIR034C"	"iYIR034C"	4870	16880	130	990	928	408	93	103	73	98	93	0	982	892	507	39	51	108	90	80	0	0.951	0.979	0.962	1.093	1.855	0.900	0.785	120	583	1840	1688	-0.072	897	943	835	853	0
1	16	15	"iYJL223C-0"	"iYJL223C-0"	5080	16880	140	4450	3963	1758	92	97	32	100	99	0	10180	8617	4928	38	40	21	100	99	0	0.430	0.451	0.429	0.523	2.074	0.403	0.876	156	546	14500	12450	-1.219	4358	10142	3871	8579	0
1	17	15	"iYJL219W"	"iYJL219W"	5270	16880	140	893	825	347	92	97	33	98	96	0	2950	2430	1213	39	41	22	99	98	0	0.275	0.307	0.288	0.346	2.145	0.264	0.753	156	507	3712	3124	-1.862	801	2911	733	2391	0
1	18	15	"iYJL215C"	"iYJL215C"	5470	16860	130	207	221	106	91	96	50	81	55	0	866	787	463	39	54	299	75	56	0	0.140	0.174	0.156	0.186	3.276	0.116	0.335	120	538	943	878	-2.834	116	827	130	748	0
1	19	15	"iYJR093C"	"iYJR093C"	5670	16870	130	1334	1253	525	93	100	49	99	99	0	2175	1998	1003	39	41	24	100	100	0	0.581	0.592	0.567	0.627	1.906	0.539	0.812	120	516	3377	3119	-0.783	1241	2136	1160	1959	0
1	20	15	"iYJR095W"	"iYJR095W"	5870	16870	130	836	776	385	93	101	45	96	94	0	2322	2084	1241	37	41	25	99	98	0	0.325	0.334	0.343	0.369	1.820	0.305	0.866	120	541	3028	2730	-1.621	743	2285	683	2047	0
1	21	15	"iYJR099W"	"iYJR099W"	6070	16880	120	192	237	253	95	98	32	89	64	0	368	352	167	36	39	23	98	95	0	0.292	0.449	0.346	0.359	2.799	0.751	0.179	120	596	429	458	-1.775	97	332	142	316	0
1	1	16	"iYJR115W"	"iYJR115W"	2060	17080	130	381	387	184	90	95	33	95	93	0	2417	2031	1048	45	48	28	100	99	0	0.123	0.150	0.140	0.156	1.982	0.142	0.741	120	723	2663	2283	-3.027	291	2372	297	1986	0
1	2	16	"iYJR119C"	"iYJR119C"	2270	17080	130	536	557	306	91	95	34	97	91	0	1148	1049	563	44	45	23	100	98	0	0.403	0.464	0.438	0.455	1.908	0.465	0.733	120	632	1549	1471	-1.311	445	1104	466	1005	0
1	3	16	"iYJR123W"	"iYJR123W"	2470	17080	120	1073	1034	436	91	94	35	100	100	0	859	788	400	42	47	41	98	97	0	1.202	1.264	1.216	1.357	1.611	1.222	0.866	120	524	1799	1689	0.265	982	817	943	746	0
1	4	16	"iYJR140C"	"iYJR140C"	2660	17090	140	390	394	201	91	95	36	95	92	0	1118	1011	569	41	46	39	96	92	0	0.278	0.312	0.299	0.344	2.600	0.264	0.574	156	582	1376	1273	-1.849	299	1077	303	970	0
1	5	16	"iYJR144W"	"iYJR144W"	2850	17090	120	468	493	188	92	96	34	98	96	0	1435	1291	554	40	41	20	100	100	0	0.270	0.321	0.294	0.345	1.843	0.288	0.744	120	517	1771	1652	-1.891	376	1395	401	1251	0
1	6	16	"iYJR149W"	"iYJR149W"	3060	17090	130	1140	1066	363	91	95	33	100	100	0	2533	2168	999	39	40	19	100	100	0	0.421	0.458	0.463	0.492	1.437	0.416	0.887	120	618	3543	3104	-1.249	1049	2494	975	2129	0
1	7	16	"iYJR159W"	"iYJR159W"	3270	17080	140	842	795	294	90	94	33	99	98	0	5236	4309	2210	39	41	24	100	100	0	0.145	0.165	0.166	0.196	1.934	0.145	0.843	156	569	5949	4975	-2.789	752	5197	705	4270	0
1	8	16	"iYKL225W"	"iYKL225W"	3460	17090	140	23217	19381	9165	88	93	31	100	100	0	23279	19351	11161	39	42	23	100	100	0	0.995	0.999	0.955	1.164	1.871	0.935	0.902	156	614	46369	38605	-0.007	23129	23240	19293	19312	0
1	9	16	"iYKL221W-0"	"iYKL221W-0"	3660	17080	130	1012	950	366	88	94	34	99	99	0	2264	1882	901	40	41	21	100	100	0	0.415	0.468	0.453	0.500	1.525	0.435	0.890	120	638	3148	2704	-1.267	924	2224	862	1842	0
1	10	16	"iYKR062W"	"iYKR062W"	3900	17060	130	180	190	76	88	94	39	78	61	0	447	368	209	39	41	21	92	90	0	0.225	0.310	0.290	0.352	3.516	0.254	0.358	120	554	500	431	-2.149	92	408	102	329	0
1	11	16	"iYKR066C"	"iYKR066C"	4070	17060	140	798	724	289	92	94	37	98	95	0	2181	1743	947	38	40	20	99	98	0	0.329	0.371	0.372	0.443	2.055	0.331	0.827	156	556	2849	2337	-1.602	706	2143	632	1705	0
1	12	16	"iYKR070W"	"iYKR070W"	4260	17060	140	1766	1551	730	93	94	39	100	98	0	1272	1145	661	37	41	24	98	98	0	1.355	1.316	1.293	1.458	1.882	1.271	0.859	156	621	2908	2566	0.438	1673	1235	1458	1108	0
1	13	16	"iYKR084C"	"iYKR084C"	4470	17060	130	452	435	150	92	95	35	99	96	0	1355	1200	560	38	40	23	100	98	0	0.273	0.295	0.296	0.325	1.822	0.255	0.758	120	608	1677	1505	-1.871	360	1317	343	1162	0
1	14	16	"iYKR088C"	"iYKR088C"	4680	17050	130	359	353	156	93	107	84	85	68	0	658	572	348	38	67	458	58	13	0	0.429	0.487	0.480	0.568	2.198	0.457	0.527	120	618	886	794	-1.221	266	620	260	534	0
1	15	16	"iYKR092C-0"	"iYKR092C-0"	4860	17060	140	420	398	148	91	99	59	93	85	0	2111	1755	881	38	65	434	87	76	0	0.159	0.179	0.175	0.197	1.936	0.158	0.773	156	695	2402	2024	-2.656	329	2073	307	1717	0
1	16	16	"iYKR103W"	"iYKR103W"	5080	17060	130	339	349	165	92	96	34	94	89	0	935	846	423	39	40	22	96	95	0	0.276	0.318	0.284	0.342	2.353	0.281	0.631	120	569	1143	1064	-1.859	247	896	257	807	0
1	17	16	"iYKR106W-1"	"iYKR106W-1"	5270	17060	140	3714	3445	1448	94	99	36	99	99	0	5686	4827	2738	39	42	23	100	99	0	0.641	0.700	0.742	0.828	1.770	0.627	0.882	156	636	9267	8139	-0.641	3620	5647	3351	4788	0
1	18	16	"iYLL066C-1"	"iYLL066C-1"	5480	17060	130	14939	13661	8661	94	124	236	100	98	0	16390	14440	10414	41	90	465	95	90	0	0.908	0.942	0.924	1.161	1.803	0.874	0.902	120	644	31194	27966	-0.139	14845	16349	13567	14399	0
1	19	16	"iYLL050C"	"iYLL050C"	5670	17060	140	469	452	187	95	124	231	73	29	0	1086	904	506	39	86	455	71	52	0	0.357	0.413	0.397	0.450	2.381	0.389	0.637	156	673	1421	1222	-1.485	374	1047	357	865	0
1	20	16	"iYLL044W"	"iYLL044W"	5850	17060	130	959	905	324	93	100	42	99	98	0	2985	2505	1236	38	41	24	98	98	0	0.294	0.329	0.318	0.380	1.836	0.292	0.876	120	612	3813	3279	-1.767	866	2947	812	2467	0
1	21	16	"iYLL040C"	"iYLL040C"	6070	17070	140	471	445	194	95	97	32	96	93	0	1131	1045	629	37	40	21	96	95	0	0.344	0.347	0.346	0.399	2.133	0.302	0.795	156	850	1470	1358	-1.541	376	1094	350	1008	0
1	1	17	"iYLR267W"	"iYLR267W"	2060	17280	130	755	728	314	91	95	33	99	97	0	3259	2920	1705	45	48	28	99	99	0	0.207	0.222	0.204	0.259	2.034	0.188	0.815	120	676	3878	3512	-2.275	664	3214	637	2875	0
1	2	17	"itV(AAC)L"	"itV(AAC)L"	2230	17280	120	375	372	137	93	95	34	94	88	0	1026	934	445	42	45	25	99	94	0	0.287	0.313	0.313	0.319	1.851	0.290	0.807	120	559	1266	1171	-1.803	282	984	279	892	0
1	3	17	"iYLR275W"	"iYLR275W"	2440	17280	120	675	649	251	91	96	40	98	95	0	569	531	245	41	45	36	96	94	0	1.106	1.139	1.123	1.209	1.840	1.119	0.829	120	666	1112	1048	0.145	584	528	558	490	0
1	4	17	"iYLR293C"	"iYLR293C"	2680	17270	130	625	606	241	90	94	35	99	98	0	2287	1987	1079	40	44	26	100	98	0	0.238	0.265	0.268	0.307	1.907	0.241	0.838	120	590	2782	2463	-2.070	535	2247	516	1947	0
1	5	17	"iYLR298C"	"iYLR298C"	2850	17280	120	1121	1046	391	90	95	35	100	100	0	4417	3892	1808	40	40	20	100	100	0	0.236	0.248	0.241	0.268	1.773	0.220	0.803	120	497	5408	4808	-2.086	1031	4377	956	3852	0
1	6	17	"iYLRCdelta18"	"iYLRCdelta18"	3040	17280	120	243	257	144	90	96	42	90	73	0	293	297	160	38	40	19	98	92	0	0.600	0.645	0.605	0.674	2.620	0.335	0.202	120	553	408	426	-0.737	153	255	167	259	0
1	7	17	"iYLR318W"	"iYLR318W"	3240	17280	150	616	596	222	89	93	38	98	96	0	1027	948	428	38	41	25	98	97	0	0.533	0.557	0.544	0.589	1.638	0.530	0.867	156	716	1516	1417	-0.908	527	989	507	910	0
1	8	17	"iYLR323C"	"iYLR323C"	3440	17280	130	613	584	187	88	92	30	100	97	0	1654	1478	604	38	41	25	99	98	0	0.325	0.344	0.362	0.369	1.572	0.307	0.846	120	624	2141	1936	-1.622	525	1616	496	1440	0
1	9	17	"iYLR327C"	"iYLR327C"	3670	17280	130	332	342	184	91	95	30	95	90	0	2206	1938	1193	40	42	23	99	98	0	0.111	0.132	0.122	0.160	2.658	0.108	0.578	120	691	2407	2149	-3.168	241	2166	251	1898	0
1	10	17	"iYLR338W"	"iYLR338W"	3870	17270	130	249	264	118	93	95	33	91	85	0	1293	1097	649	39	40	20	97	95	0	0.124	0.162	0.154	0.188	2.714	0.125	0.512	120	647	1410	1229	-3.007	156	1254	171	1058	0
1	11	17	"iYLR343W"	"iYLR343W"	4050	17290	130	843	803	348	93	95	36	97	95	0	2016	1671	884	38	39	17	99	97	0	0.379	0.435	0.432	0.497	1.904	0.402	0.871	120	627	2728	2343	-1.399	750	1978	710	1633	0
1	12	17	"iYLR345W"	"iYLR345W"	4260	17290	140	1439	1312	640	92	95	37	99	99	0	1069	962	528	38	40	21	98	97	0	1.306	1.320	1.327	1.413	1.821	1.307	0.896	156	719	2378	2144	0.386	1347	1031	1220	924	0
1	13	17	"iYMR044W"	"iYMR044W"	4470	17280	140	3381	3106	1511	90	95	32	100	100	0	2888	2630	1566	38	41	47	98	98	0	1.155	1.164	1.178	1.322	1.699	1.097	0.870	156	693	6141	5608	0.208	3291	2850	3016	2592	0
1	14	17	"iYMR048W"	"iYMR048W"	4650	17290	130	1803	1618	668	89	96	36	98	98	0	2255	1890	972	38	60	456	83	77	0	0.773	0.826	0.799	0.916	1.593	0.683	0.723	120	600	3931	3381	-0.371	1714	2217	1529	1852	0
1	15	17	"iYMRCdelta10"	"iYMRCdelta10"	4830	17290	130	503	520	258	91	97	42	97	92	0	523	492	251	38	58	437	55	5	0	0.849	0.945	0.921	0.982	1.887	0.191	0.144	120	654	897	883	-0.235	412	485	429	454	0
1	16	17	"iYMR067C"	"iYMR067C"	5060	17290	130	877	885	382	93	97	41	100	97	0	2383	2035	1099	38	39	21	99	99	0	0.334	0.397	0.387	0.464	2.005	0.368	0.854	120	646	3129	2789	-1.581	784	2345	792	1997	0
1	17	17	"iYMR071C"	"iYMR071C"	5250	17300	140	1152	1058	437	92	95	32	100	100	0	2252	1929	979	37	38	19	98	98	0	0.479	0.511	0.505	0.561	1.714	0.479	0.909	156	691	3275	2858	-1.063	1060	2215	966	1892	0
1	18	17	"iYMR075C-A"	"iYMR075C-A"	5450	17310	130	1936	1754	877	93	99	45	100	99	0	1005	1103	635	38	43	37	97	96	0	1.906	1.560	1.458	1.692	1.847	1.514	0.881	120	608	2810	2726	0.930	1843	967	1661	1065	0
1	19	17	"iYMR090W"	"iYMR090W"	5640	17300	130	832	774	314	91	96	42	97	95	0	1842	1561	812	37	40	28	99	97	0	0.411	0.448	0.430	0.475	1.697	0.411	0.890	120	655	2546	2207	-1.284	741	1805	683	1524	0
1	20	17	"iYMR095C"	"iYMR095C"	5860	17300	130	843	785	375	91	96	43	98	97	0	1537	1376	913	37	39	23	100	100	0	0.501	0.518	0.544	0.603	1.679	0.454	0.863	120	700	2252	2033	-0.996	752	1500	694	1339	0
1	21	17	"iYMRCdelta13"	"iYMRCdelta13"	6060	17300	120	379	391	177	92	95	29	91	89	0	530	579	376	37	39	20	96	95	0	0.582	0.552	0.554	0.591	2.057	0.463	0.724	120	634	780	841	-0.781	287	493	299	542	0
1	1	18	"iYMR111C"	"iYMR111C"	2060	17500	130	571	560	228	90	95	37	98	95	0	2194	2072	1187	43	47	28	99	98	0	0.224	0.232	0.233	0.272	1.861	0.202	0.838	120	676	2632	2499	-2.161	481	2151	470	2029	0
1	2	18	"iYMR115W"	"iYMR115W"	2220	17500	120	127	132	51	90	96	61	29	7	0	142	153	91	42	46	28	81	67	0	0.370	0.378	0.450	0.383	3.385	0.341	0.165	120	517	137	153	-1.434	37	100	42	111	0
1	3	18	"iYMRWdelta16"	"iYMRWdelta16"	2420	17510	130	253	260	102	88	95	59	86	69	0	848	786	473	41	43	24	97	95	0	0.204	0.231	0.225	0.271	2.345	0.181	0.453	120	606	972	917	-2.290	165	807	172	745	0
1	4	18	"iYNL258C"	"iYNL258C"	2630	17500	150	404	390	150	91	96	51	94	87	0	1091	938	514	40	42	22	98	96	0	0.298	0.333	0.347	0.372	1.838	0.291	0.753	156	809	1364	1197	-1.748	313	1051	299	898	0
1	5	18	"iYNL254C"	"iYNL254C"	2860	17500	140	1353	1304	623	90	98	56	96	96	0	4821	4123	2361	39	41	22	98	98	0	0.264	0.297	0.287	0.345	2.098	0.268	0.843	156	680	6045	5298	-1.921	1263	4782	1214	4084	0
1	6	18	"iYNL249C"	"iYNL249C"	3040	17510	130	579	578	226	90	96	41	99	97	0	1926	1675	874	38	43	30	100	100	0	0.259	0.298	0.284	0.334	1.782	0.257	0.807	120	616	2377	2125	-1.949	489	1888	488	1637	0
1	7	18	"iYNL231C"	"iYNL231C"	3260	17500	130	290	298	116	92	97	39	92	83	0	585	558	302	39	44	33	94	90	0	0.363	0.397	0.383	0.440	2.338	0.403	0.582	120	608	744	725	-1.463	198	546	206	519	0
1	8	18	"iYNL225C"	"iYNL225C"	3440	17500	130	466	461	211	91	95	33	95	92	0	1403	1146	633	39	43	29	95	94	0	0.275	0.334	0.317	0.380	2.096	0.294	0.734	120	592	1739	1477	-1.863	375	1364	370	1107	0
1	9	18	"iYNL221C"	"iYNL221C"	3640	17500	130	671	657	265	89	95	41	96	96	0	3666	3178	1517	40	42	25	100	100	0	0.161	0.181	0.174	0.197	1.718	0.156	0.771	120	627	4208	3706	-2.639	582	3626	568	3138	0
1	10	18	"iYNL202W"	"iYNL202W"	3840	17500	120	237	249	107	89	96	45	85	70	0	602	574	352	39	39	19	95	94	0	0.263	0.299	0.286	0.311	2.177	0.260	0.668	120	585	711	695	-1.928	148	563	160	535	0
1	11	18	"iYNL197C"	"iYNL197C"	4040	17500	120	322	342	159	91	95	37	95	88	0	1613	1493	871	39	40	19	99	98	0	0.147	0.173	0.167	0.183	2.202	0.139	0.600	120	557	1805	1705	-2.768	231	1574	251	1454	0
1	12	18	"iYNL193W"	"iYNL193W"	4250	17500	130	445	426	178	91	94	30	97	95	0	2459	2067	1097	39	43	63	99	96	0	0.146	0.165	0.163	0.182	1.814	0.151	0.795	120	554	2774	2363	-2.773	354	2420	335	2028	0
1	13	18	"iYNL176C"	"iYNL176C"	4430	17500	140	331	337	128	92	96	30	96	92	0	1941	1785	919	39	45	74	95	94	0	0.126	0.140	0.143	0.157	1.952	0.126	0.779	156	628	2141	1991	-2.992	239	1902	245	1746	0
1	14	18	"iYNL168C"	"iYNL168C"	4640	17500	130	791	754	291	89	94	33	99	98	0	2308	1980	997	39	42	51	98	98	0	0.309	0.343	0.333	0.375	1.678	0.304	0.860	120	553	2971	2606	-1.693	702	2269	665	1941	0
1	15	18	"iYNL164C"	"iYNL164C"	4830	17500	140	491	542	281	92	96	33	98	96	0	1230	1207	572	37	39	19	100	99	0	0.334	0.385	0.348	0.395	2.008	0.363	0.698	156	628	1592	1620	-1.580	399	1193	450	1170	0
1	16	18	"iYOL113W"	"iYOL113W"	5050	17490	140	206	211	72	92	97	39	87	67	0	667	631	343	37	38	18	98	96	0	0.181	0.200	0.195	0.224	2.482	0.168	0.594	156	626	744	713	-2.466	114	630	119	594	0
1	17	18	"iYOL109W"	"iYOL109W"	5230	17500	130	199	225	198	91	93	29	90	75	0	319	327	162	36	37	17	99	98	0	0.382	0.460	0.394	0.400	2.030	0.652	0.401	120	527	391	425	-1.390	108	283	134	291	0
1	18	18	"iYOLCdelta3"	"iYOLCdelta3"	5450	17500	140	615	679	340	92	94	28	99	98	0	622	646	382	36	37	16	98	97	0	0.892	0.962	0.969	1.038	1.786	0.930	0.845	156	616	1109	1197	-0.164	523	586	587	610	0
1	19	18	"iYOL092W"	"iYOL092W"	5640	17500	140	206	209	79	90	93	28	91	81	0	545	531	271	36	37	15	98	97	0	0.228	0.240	0.224	0.256	2.403	0.198	0.511	156	566	625	614	-2.134	116	509	119	495	0
1	20	18	"iYOL088C"	"iYOL088C"	5840	17500	130	1086	1051	411	91	98	45	100	99	0	2872	2478	1125	36	39	31	100	100	0	0.351	0.393	0.395	0.428	1.658	0.386	0.863	120	540	3831	3402	-1.511	995	2836	960	2442	0
1	21	18	"iYOL084W"	"iYOL084W"	6050	17500	140	435	433	188	94	99	42	96	92	0	2841	2452	1391	37	40	32	98	98	0	0.122	0.140	0.143	0.154	1.971	0.127	0.813	156	766	3145	2754	-3.040	341	2804	339	2415	0
1	1	19	"iYOL067C"	"iYOL067C"	2050	17710	120	250	257	94	89	95	41	93	85	0	813	734	303	43	48	72	97	95	0	0.209	0.243	0.233	0.248	1.962	0.207	0.587	120	610	931	859	-2.258	161	770	168	691	0
1	2	19	"iYOL063C"	"iYOL063C"	2270	17700	140	352	356	160	90	94	32	95	91	0	1496	1548	961	43	46	27	99	98	0	0.180	0.177	0.185	0.199	2.157	0.146	0.689	156	567	1715	1771	-2.471	262	1453	266	1505	0
1	3	19	"iYOL059W"	"iYOL059W"	2440	17710	140	1182	1074	405	90	94	33	100	98	0	4115	3367	1757	41	43	25	99	99	0	0.268	0.296	0.286	0.335	1.787	0.265	0.887	156	563	5166	4310	-1.899	1092	4074	984	3326	0
1	4	19	"iYOL045W"	"iYOL045W"	2650	17700	130	541	530	188	94	97	37	98	95	0	1387	1173	523	42	43	23	99	98	0	0.332	0.385	0.385	0.425	1.782	0.357	0.838	120	504	1792	1567	-1.589	447	1345	436	1131	0
1	5	19	"iYOL041C"	"iYOL041C"	2830	17700	140	388	393	158	90	98	58	94	87	0	1463	1355	680	39	42	26	99	99	0	0.209	0.230	0.231	0.237	2.033	0.209	0.764	156	605	1722	1619	-2.257	298	1424	303	1316	0
1	6	19	"iYOL035C"	"iYOL035C"	3040	17700	130	535	532	199	89	95	33	97	97	0	1729	1534	647	37	40	26	100	98	0	0.264	0.296	0.284	0.310	1.863	0.270	0.800	120	571	2138	1940	-1.924	446	1692	443	1497	0
1	7	19	"iYOR260W"	"iYOR260W"	3250	17700	140	322	325	150	89	95	35	90	84	0	733	693	437	38	40	24	96	91	0	0.335	0.360	0.350	0.367	2.224	0.317	0.723	156	623	928	891	-1.577	233	695	236	655	0
1	8	19	"iYOR265W"	"iYOR265W"	3450	17700	140	605	586	241	92	97	33	98	96	0	1317	1167	614	39	41	24	98	96	0	0.401	0.438	0.425	0.485	1.965	0.399	0.852	156	579	1791	1622	-1.317	513	1278	494	1128	0
1	9	19	"iYOR269W"	"iYOR269W"	3650	17700	140	889	892	418	94	97	41	97	96	0	895	907	495	38	41	25	98	96	0	0.928	0.918	0.908	0.975	2.270	0.902	0.827	156	597	1652	1667	-0.108	795	857	798	869	0
1	10	19	"iYOR287C"	"iYOR287C"	3850	17690	130	436	466	315	89	94	43	97	94	0	1083	1068	603	38	38	18	100	99	0	0.332	0.366	0.343	0.392	2.032	0.302	0.478	120	577	1392	1407	-1.590	347	1045	377	1030	0
1	11	19	"iYOR290C"	"iYOR290C"	4060	17680	130	522	519	255	89	93	35	97	90	0	2009	2083	1406	40	41	23	97	97	0	0.220	0.210	0.225	0.260	2.359	0.180	0.779	120	611	2402	2473	-2.185	433	1969	430	2043	0
1	12	19	"iYOR294W"	"iYOR294W"	4250	17690	130	629	665	334	92	95	34	98	96	0	2715	2639	1566	39	46	66	100	98	0	0.201	0.220	0.226	0.239	1.744	0.206	0.860	120	587	3213	3173	-2.317	537	2676	573	2600	0
1	13	19	"iYOR311C"	"iYOR311C"	4460	17690	120	273	285	118	91	96	54	91	70	0	842	821	477	39	45	67	97	91	0	0.227	0.248	0.244	0.264	1.941	0.213	0.681	120	526	985	976	-2.141	182	803	194	782	0
1	14	19	"iYOR315W"	"iYOR315W"	4660	17690	140	711	714	306	92	97	49	97	96	0	1339	1361	840	38	42	28	98	96	0	0.476	0.470	0.460	0.534	1.956	0.401	0.829	156	617	1920	1945	-1.072	619	1301	622	1323	0
1	15	19	"iYOR318C"	"iYOR318C"	4860	17700	140	1091	1020	401	91	95	31	100	98	0	2786	2385	1253	38	41	22	99	98	0	0.364	0.396	0.389	0.451	1.708	0.354	0.878	156	538	3748	3276	-1.458	1000	2748	929	2347	0
1	16	19	"iYOR337W"	"iYOR337W"	5060	17700	140	322	333	142	91	94	30	94	91	0	599	579	334	38	40	20	96	91	0	0.412	0.447	0.424	0.497	2.086	0.398	0.743	156	531	792	783	-1.280	231	561	242	541	0
1	17	19	"iYOR341W"	"iYOR341W"	5240	17700	140	1051	1161	705	91	93	29	100	99	0	1172	1402	980	37	39	19	99	98	0	0.846	0.784	0.750	0.835	1.803	0.741	0.866	156	608	2095	2435	-0.242	960	1135	1070	1365	0
1	18	19	"iYORWdelta24"	"iYORWdelta24"	5450	17690	130	463	481	229	92	95	32	99	97	0	645	608	319	36	38	18	99	99	0	0.609	0.680	0.667	0.713	1.747	0.658	0.793	120	601	980	961	-0.715	371	609	389	572	0
1	19	19	"iYPL030W"	"iYPL030W"	5670	17690	140	439	466	367	91	95	31	98	96	0	1143	1104	571	36	38	17	98	96	0	0.314	0.351	0.292	0.373	2.394	0.294	0.332	156	594	1455	1443	-1.669	348	1107	375	1068	0
1	20	19	"iYPL026C"	"iYPL026C"	5850	17690	140	221	247	153	94	108	79	73	36	0	815	776	467	37	51	99	89	81	0	0.163	0.207	0.193	0.210	2.281	0.197	0.518	156	524	905	892	-2.615	127	778	153	739	0
1	21	19	"iYPL022W"	"iYPL022W"	6050	17700	140	4287	4211	2127	98	108	72	100	98	0	2569	2327	1237	37	50	89	96	93	0	1.654	1.796	1.724	2.000	1.752	1.850	0.859	156	682	6721	6403	0.726	4189	2532	4113	2290	0
1	1	20	"iYPL005W"	"iYPL005W"	2040	17900	140	3984	3778	2068	90	96	37	100	99	0	1472	1380	839	43	48	63	93	91	0	2.725	2.758	2.753	3.113	2.079	2.768	0.893	156	857	5323	5025	1.446	3894	1429	3688	1337	0
1	2	20	"iYPL001W"	"iYPL001W"	2250	17900	140	577	574	284	91	95	32	97	96	0	418	401	208	42	45	30	92	90	0	1.293	1.345	1.313	1.346	1.806	1.394	0.793	156	714	862	842	0.370	486	376	483	359	0
1	3	20	"itF(GAA)P1"	"itF(GAA)P1"	2440	17900	130	818	790	327	89	93	31	99	97	0	860	792	407	40	41	23	100	97	0	0.889	0.932	0.946	1.018	1.777	0.891	0.859	120	611	1549	1453	-0.170	729	820	701	752	0
1	4	20	"iYPR013C-1"	"iYPR013C-1"	2650	17890	140	482	480	213	87	93	33	98	97	0	3695	3430	1996	39	43	29	100	99	0	0.108	0.116	0.114	0.127	1.955	0.102	0.812	156	764	4051	3784	-3.210	395	3656	393	3391	0
1	5	20	"iYPR016C"	"iYPR016C"	2860	17900	120	191	194	73	90	94	35	78	69	0	403	380	208	39	43	30	95	90	0	0.277	0.305	0.295	0.316	2.675	0.237	0.442	120	584	465	445	-1.850	101	364	104	341	0
1	6	20	"iYPR020W"	"iYPR020W"	3060	17900	140	1729	1602	731	89	94	32	100	100	0	716	641	320	38	41	25	96	94	0	2.419	2.509	2.479	2.731	1.828	2.581	0.872	156	732	2318	2116	1.274	1640	678	1513	603	0
1	7	20	"iYPR035W"	"iYPR035W"	3250	17900	140	211	225	87	87	92	33	92	78	0	675	663	356	38	41	32	94	93	0	0.195	0.221	0.227	0.239	2.429	0.189	0.604	156	711	761	763	-2.361	124	637	138	625	0
1	8	20	"iYPR042C"	"iYPR042C"	3460	17900	140	244	245	83	90	94	34	91	82	0	1630	1340	733	40	42	33	99	95	0	0.097	0.119	0.113	0.139	2.422	0.102	0.665	156	700	1744	1455	-3.368	154	1590	155	1300	0
1	9	20	"iYPR047W"	"iYPR047W"	3650	17900	140	437	449	195	92	94	30	95	92	0	1164	1064	553	39	41	23	99	98	0	0.307	0.348	0.342	0.364	2.004	0.319	0.772	156	693	1470	1382	-1.705	345	1125	357	1025	0
1	10	20	"iYCL001W-A"	"iYCL001W-A"	3850	17890	140	3395	3481	1824	92	94	31	100	100	0	1240	1240	718	39	41	28	98	95	0	2.750	2.822	2.826	3.159	1.832	2.894	0.847	156	743	4504	4590	1.460	3303	1201	3389	1201	0
1	11	20	"iYCL007C"	"iYCL007C"	4040	17900	120	599	613	306	93	95	31	98	96	0	569	582	372	40	43	28	96	94	0	0.957	0.959	0.997	1.062	2.172	0.892	0.713	120	610	1035	1062	-0.064	506	529	520	542	0
1	12	20	"iYCL012W"	"iYCL012W"	4240	17890	130	4222	3854	1978	92	96	35	100	100	0	1391	1434	906	39	43	33	100	98	0	3.055	2.697	2.536	3.043	1.729	2.603	0.883	120	712	5482	5157	1.611	4130	1352	3762	1395	0
1	13	20	"iYCR011C"	"iYCR011C"	4450	17890	130	268	279	122	90	96	50	90	75	0	445	449	245	38	41	28	96	96	0	0.437	0.460	0.479	0.470	2.153	0.418	0.646	120	712	585	600	-1.193	178	407	189	411	0
1	14	20	"iYCRCdelta6-A"	"iYCRCdelta6-A"	4650	17900	120	304	336	220	93	97	49	88	84	0	439	415	240	37	40	26	95	90	0	0.525	0.643	0.652	0.648	2.007	0.727	0.764	120	613	613	621	-0.930	211	402	243	378	0
1	15	20	"iYHR210C-A"	"iYHR210C-A"	4860	17900	140	1242	1198	542	92	95	32	99	98	0	5626	4994	2479	38	40	21	99	99	0	0.206	0.223	0.221	0.238	1.736	0.209	0.870	156	705	6738	6062	-2.281	1150	5588	1106	4956	0
1	16	20	"iYHRCdelta14-C"	"iYHRCdelta14-C"	5010	17880	130	1565	1821	1008	96	97	31	99	99	0	3558	3784	2348	38	40	21	100	100	0	0.417	0.460	0.460	0.506	1.761	0.433	0.860	120	558	4989	5471	-1.261	1469	3520	1725	3746	0
1	17	20	"iYHRCdelta16-B"	"iYHRCdelta16-B"	5250	17900	140	2065	2581	5885	95	97	31	99	99	0	7829	6824	4734	38	39	18	100	98	0	0.253	0.366	0.278	0.344	1.988	0.772	0.481	156	811	9761	9272	-1.984	1970	7791	2486	6786	0
1	18	20	"iYLR157C-A"	"iYLR157C-A"	5450	17900	130	3840	3348	1516	94	98	35	100	100	0	11423	9528	5195	38	40	25	100	100	0	0.329	0.343	0.333	0.381	1.597	0.317	0.906	120	692	15131	12744	-1.604	3746	11385	3254	9490	0
1	19	20	"tE(UUC)C"	"tE(UUC)C"	5650	17900	120	169	180	67	92	97	31	76	60	0	257	265	143	37	39	25	92	90	0	0.350	0.386	0.351	0.373	3.057	0.346	0.480	120	628	297	316	-1.515	77	220	88	228	0
1	20	20	"tQ(UUG)L"	"tQ(UUG)L"	5870	17890	150	244	275	149	97	111	77	73	48	0	409	452	296	38	54	102	84	69	0	0.396	0.430	0.431	0.442	2.031	0.453	0.690	156	750	518	592	-1.336	147	371	178	414	0
1	21	20	"YHRCTy1-1B"	"YHRCTy1-1B"	6040	17890	140	23728	23822	15681	95	105	65	100	100	0	32977	29313	18071	38	50	83	100	99	3	0.717	0.810	0.786	0.833	1.891	0.823	0.905	156	784	56572	53002	-0.479	23633	32939	23727	29275	0
2	1	1	"VPS8"	"YAL002W"	6640	14120	120	10203	9806	5891	100	106	44	99	99	0	4357	4284	2847	41	42	22	98	97	0	2.341	2.288	2.233	2.509	2.537	2.301	0.879	120	695	14419	13949	1.227	10103	4316	9706	4243	0
2	2	1	"MTW1"	"YAL034W-A"	6830	14110	120	15545	13848	6117	105	117	70	100	100	0	5717	4838	2436	42	48	34	99	99	0	2.721	2.866	2.784	3.228	2.033	2.902	0.894	120	616	21115	18539	1.444	15440	5675	13743	4796	0
2	3	1	"YAL065C-A"	"YAL065C-A"	7030	14120	120	4770	4535	1953	100	112	72	100	99	0	7547	6471	3492	40	47	35	99	99	0	0.622	0.690	0.650	0.835	2.183	0.637	0.884	120	614	12177	10866	-0.685	4670	7507	4435	6431	0
2	4	1	"YAL004W"	"YAL004W"	7220	14110	120	1824	1786	1012	98	102	31	97	95	0	3537	3280	2091	39	41	24	99	98	0	0.493	0.521	0.521	0.578	2.192	0.492	0.904	120	630	5224	4929	-1.019	1726	3498	1688	3241	0
2	5	1	"FUN12"	"YAL035W"	7430	14120	110	2002	2272	1278	100	103	32	100	100	0	4100	4259	2798	40	42	27	100	100	0	0.468	0.515	0.508	0.604	1.846	0.483	0.894	80	576	5962	6391	-1.094	1902	4060	2172	4219	0
2	6	1	"SEO1"	"YAL067C"	7620	14130	100	755	781	412	101	104	43	97	95	0	2599	2776	1794	39	42	37	100	100	0	0.255	0.248	0.256	0.266	1.616	0.232	0.877	80	478	3214	3417	-1.969	654	2560	680	2737	0
2	7	1	"ERP2"	"YAL007C"	7820	14120	120	6472	5700	2799	101	110	57	99	99	0	3836	3315	1812	42	49	41	99	96	0	1.679	1.711	1.662	2.011	2.123	1.715	0.900	120	647	10165	8872	0.748	6371	3794	5599	3273	0
2	8	1	"YAL037W"	"YAL037W"	8020	14120	120	3046	2808	1081	100	104	33	99	99	0	4822	4139	1910	40	44	30	99	98	0	0.616	0.661	0.638	0.733	1.925	0.625	0.901	120	612	7728	6807	-0.699	2946	4782	2708	4099	0
2	9	1	"YAL069W"	"YAL069W"	8210	14120	130	28567	23987	11105	103	114	55	100	100	0	26811	21259	10672	41	52	54	100	100	0	1.063	1.126	1.091	1.205	1.658	1.126	0.911	120	693	55234	45102	0.089	28464	26770	23884	21218	0
2	10	1	"SPO7"	"YAL009W"	8420	14120	120	7168	6646	2878	104	113	52	100	100	0	5394	4619	2093	43	54	66	100	99	0	1.320	1.430	1.372	1.527	1.937	1.461	0.887	120	641	12415	11118	0.401	7064	5351	6542	4576	0
2	11	1	"CYC3"	"YAL039C"	8620	14120	120	873	831	334	102	108	55	97	95	0	4124	3526	1797	41	42	23	99	96	0	0.189	0.209	0.211	0.247	2.155	0.187	0.850	120	646	4854	4214	-2.405	771	4083	729	3485	0
2	12	1	"YAR002W"	"YAR002W"	8820	14120	110	11946	10882	3133	104	109	39	100	100	0	5296	4582	1812	41	43	24	100	100	0	2.253	2.373	2.269	2.575	1.536	2.350	0.905	80	571	17097	15319	1.172	11842	5255	10778	4541	0
2	13	1	"CNS1"	"YBR155W"	9020	14130	120	3449	3450	1546	103	108	37	100	100	0	4226	3912	2079	40	44	27	100	97	0	0.799	0.864	0.823	1.024	2.188	0.821	0.862	120	649	7532	7219	-0.323	3346	4186	3347	3872	0
2	14	1	"PCH2"	"YBR186W"	9210	14130	100	346	367	211	101	107	41	86	72	0	687	1063	993	40	42	24	98	91	0	0.379	0.260	0.283	0.303	2.084	0.213	0.786	80	476	892	1289	-1.401	245	647	266	1023	0
2	15	1	"PYC2"	"YBR218C"	9410	14120	120	308	318	116	101	108	40	95	85	0	665	609	286	41	42	22	99	99	0	0.332	0.382	0.366	0.376	1.949	0.338	0.682	120	666	831	785	-1.592	207	624	217	568	0
2	16	1	"ICS2"	"YBR157C"	9610	14120	110	706	691	256	103	107	34	100	100	0	3325	2998	1284	40	42	25	100	100	0	0.184	0.199	0.184	0.207	1.564	0.177	0.810	80	584	3888	3546	-2.446	603	3285	588	2958	0
2	17	1	"NTC20"	"YBR188C"	9810	14130	120	738	717	277	104	109	40	100	96	0	2980	2641	1320	40	44	38	100	100	0	0.216	0.236	0.235	0.262	1.727	0.214	0.865	120	689	3574	3214	-2.213	634	2940	613	2601	0
2	18	1	"YBR220C"	"YBR220C"	10020	14130	120	633	654	274	103	109	45	100	99	0	2824	2850	1518	40	46	59	100	99	0	0.190	0.196	0.198	0.213	1.686	0.180	0.860	120	668	3314	3361	-2.393	530	2784	551	2810	0
2	19	1	"YBR159W"	"YBR159W"	10220	14130	130	1034	1034	292	103	105	31	100	100	0	4089	3773	1343	39	41	21	100	100	0	0.230	0.249	0.245	0.266	1.563	0.231	0.904	120	710	4981	4665	-2.121	931	4050	931	3734	0
2	20	1	"YBR190W"	"YBR190W"	10420	14130	120	249	254	88	103	109	38	90	81	0	858	790	338	39	42	26	99	95	0	0.178	0.201	0.184	0.209	2.357	0.181	0.607	120	623	965	902	-2.488	146	819	151	751	0
2	21	1	"FAT2"	"YBR222C"	10610	14130	120	317	326	161	105	112	42	92	85	0	1144	1187	603	39	44	32	99	98	0	0.192	0.193	0.175	0.181	2.142	0.157	0.487	120	707	1317	1369	-2.382	212	1105	221	1148	0
2	1	2	"YBR161W"	"YBR161W"	6610	14340	130	7605	7057	2099	100	108	46	100	100	0	6462	5724	2129	42	44	24	100	100	0	1.169	1.224	1.166	1.309	1.530	1.182	0.888	120	666	13925	12639	0.225	7505	6420	6957	5682	0
2	2	2	"RIM2"	"YBR192W"	6800	14340	140	6146	5760	1722	99	105	45	100	100	0	6469	5817	2272	42	49	79	100	99	0	0.941	0.980	0.936	1.081	1.671	0.936	0.887	156	751	12474	11436	-0.088	6047	6427	5661	5775	0
2	3	2	"YBR224W"	"YBR224W"	7020	14330	130	962	928	256	100	106	47	100	100	0	4951	4444	1581	42	51	85	100	100	0	0.176	0.188	0.180	0.200	1.605	0.177	0.858	120	673	5771	5230	-2.510	862	4909	828	4402	0
2	4	2	"GPM2"	"YDL021W"	7220	14330	140	3373	3292	1210	98	102	35	99	99	0	2522	2310	1034	40	44	32	98	98	0	1.320	1.407	1.383	1.586	1.897	1.381	0.889	156	673	5757	5464	0.400	3275	2482	3194	2270	0
2	5	2	"YDL053C"	"YDL053C"	7420	14330	130	874	871	241	98	101	31	100	100	0	3113	2861	925	40	43	26	100	100	0	0.253	0.274	0.264	0.281	1.441	0.257	0.880	120	624	3849	3594	-1.986	776	3073	773	2821	0
2	6	2	"YDL085W"	"YDL085W"	7620	14330	140	843	896	390	97	101	36	99	98	0	3095	3159	1613	38	41	21	99	99	0	0.244	0.256	0.253	0.280	1.823	0.234	0.838	156	710	3803	3920	-2.035	746	3057	799	3121	0
2	7	2	"YDL023C"	"YDL023C"	7810	14330	120	1043	1054	349	102	114	85	100	99	0	3309	3003	1039	40	46	34	100	100	0	0.288	0.321	0.309	0.334	1.511	0.305	0.824	120	573	4210	3915	-1.797	941	3269	952	2963	0
2	8	2	"PSA1"	"YDL055C"	8020	14330	130	853	866	340	102	115	86	100	99	0	697	703	260	41	48	97	98	95	0	1.145	1.154	1.157	1.161	1.537	1.244	0.807	120	642	1407	1426	0.195	751	656	764	662	0
2	9	2	"LUC7"	"YDL087C"	8220	14330	140	1301	1256	466	105	118	61	99	98	0	4229	3753	1522	41	53	69	98	98	0	0.286	0.310	0.297	0.335	1.951	0.292	0.872	156	717	5384	4863	-1.808	1196	4188	1151	3712	0
2	10	2	"YDL025C"	"YDL025C"	8410	14330	130	2663	2669	895	101	107	40	100	100	0	3452	3233	1032	42	47	61	100	100	0	0.751	0.805	0.783	0.818	1.461	0.806	0.858	120	630	5972	5759	-0.413	2562	3410	2568	3191	0
2	11	2	"YDL057W"	"YDL057W"	8620	14330	130	779	802	297	101	104	36	100	100	0	1909	1859	826	39	41	37	100	99	0	0.363	0.385	0.379	0.409	1.674	0.353	0.846	120	629	2548	2521	-1.464	678	1870	701	1820	0
2	12	2	"YDL089W"	"YDL089W"	8800	14340	120	266	282	105	99	102	34	95	90	0	356	344	174	39	40	24	94	89	0	0.527	0.600	0.607	0.623	1.980	0.552	0.678	120	595	484	488	-0.925	167	317	183	305	0
2	13	2	"YDL027C"	"YDL027C"	9010	14330	130	2044	1959	637	101	108	90	100	99	0	5234	4562	1865	40	45	50	100	100	0	0.374	0.411	0.392	0.452	1.760	0.388	0.902	120	695	7137	6380	-1.419	1943	5194	1858	4522	0
2	14	2	"RAD59"	"YDL059C"	9220	14330	120	1400	1350	436	101	111	100	99	98	0	3553	3213	1141	40	45	52	100	100	0	0.370	0.394	0.396	0.399	1.512	0.377	0.900	120	596	4812	4422	-1.435	1299	3513	1249	3173	0
2	15	2	"YDL091C"	"YDL091C"	9410	14330	120	4256	4564	2420	102	106	34	100	99	0	4154	3928	2223	39	41	21	100	98	0	1.009	1.147	1.086	1.335	2.179	1.136	0.880	120	655	8269	8351	0.014	4154	4115	4462	3889	0
2	16	2	"RPA14"	"YDR156W"	9650	14340	90	189	214	96	101	106	34	80	67	0	625	609	300	40	41	20	98	98	0	0.150	0.199	0.190	0.194	2.158	0.169	0.431	52	406	673	682	-2.733	88	585	113	569	0
2	17	2	"YDR187C"	"YDR187C"	9830	14340	100	225	238	112	103	111	67	75	41	0	619	611	285	39	41	24	98	98	0	0.210	0.236	0.216	0.212	2.196	0.196	0.366	80	513	702	707	-2.249	122	580	135	572	0
2	18	2	"YDR219C"	"YDR219C"	10030	14330	90	336	357	131	107	116	82	90	69	0	375	408	222	40	47	68	94	84	0	0.684	0.679	0.651	0.750	2.110	0.645	0.525	52	400	564	618	-0.549	229	335	250	368	0
2	19	2	"HOM2"	"YDR158W"	10220	14340	120	4864	5010	2737	104	107	33	100	100	0	8181	8397	5169	40	42	21	100	99	0	0.585	0.587	0.608	0.666	1.711	0.556	0.923	120	590	12901	13263	-0.774	4760	8141	4906	8357	0
2	20	2	"SLY1"	"YDR189W"	10430	14340	120	1265	1396	771	102	107	34	99	99	0	1656	1701	1066	41	42	20	98	96	0	0.720	0.780	0.782	0.899	1.972	0.734	0.806	120	612	2778	2954	-0.474	1163	1615	1294	1660	0
2	21	2	"YDR221W"	"YDR221W"	10630	14340	110	359	466	286	105	111	43	97	91	0	715	1152	1048	40	44	34	100	100	0	0.376	0.325	0.356	0.360	1.823	0.273	0.812	80	547	929	1473	-1.410	254	675	361	1112	0
2	1	3	"SSY1"	"YDR160W"	6620	14540	130	2059	2274	1250	98	103	40	100	100	0	4040	4629	2821	41	45	30	100	100	0	0.490	0.474	0.454	0.515	1.751	0.448	0.867	120	727	5960	6764	-1.028	1961	3999	2176	4588	0
2	2	3	"HST4"	"YDR191W"	6820	14540	110	926	1018	521	92	95	29	100	98	0	2621	2633	1681	40	46	90	98	95	0	0.323	0.357	0.354	0.414	1.914	0.321	0.882	80	522	3415	3519	-1.630	834	2581	926	2593	0
2	3	3	"YDR223W"	"YDR223W"	7020	14540	90	202	220	113	92	99	41	84	67	0	265	295	144	39	42	32	94	90	0	0.487	0.500	0.453	0.459	2.401	0.484	0.402	52	410	336	384	-1.039	110	226	128	256	0
2	4	3	"NBP2"	"YDR162C"	7230	14520	150	128	176	142	100	104	37	42	28	0	63	136	167	41	45	34	42	32	0	1.273	0.800	0.988	0.977	3.345	0.863	0.455	156	743	50	171	0.348	28	22	76	95	-50
2	5	3	"YDR193W"	"YDR193W"	7420	14540	120	653	674	320	100	101	29	99	95	0	1262	1346	802	39	42	24	96	95	0	0.452	0.439	0.406	0.482	1.843	0.391	0.782	120	572	1776	1881	-1.145	553	1223	574	1307	0
2	6	3	"HTA1"	"YDR225W"	7620	14540	120	2063	1952	590	96	100	31	100	100	0	3707	3361	1313	37	39	26	100	99	0	0.536	0.558	0.536	0.610	1.549	0.526	0.914	120	577	5637	5180	-0.900	1967	3670	1856	3324	0
2	7	3	"YDR539W"	"YDR539W"	7820	14530	100	531	564	247	100	111	60	96	95	0	1440	1418	912	40	52	117	91	85	0	0.308	0.337	0.345	0.412	1.923	0.291	0.827	80	484	1831	1842	-1.700	431	1400	464	1378	0
2	8	3	"YEL025C"	"YEL025C"	8030	14540	120	695	1157	1240	105	118	87	89	85	0	1072	1869	2180	42	52	105	92	84	0	0.573	0.576	0.600	0.616	1.951	0.563	0.942	120	595	1620	2879	-0.804	590	1030	1052	1827	0
2	9	3	"YEL057C"	"YEL057C"	8220	14540	110	1150	1174	453	102	108	43	100	100	0	2375	2257	1046	38	42	30	100	98	0	0.448	0.483	0.479	0.533	1.510	0.454	0.894	80	515	3385	3291	-1.157	1048	2337	1072	2219	0
2	10	3	"YDR541C"	"YDR541C"	8400	14530	110	527	550	229	103	108	37	98	96	0	1142	1337	825	39	44	38	98	97	0	0.384	0.344	0.354	0.391	1.926	0.297	0.817	80	548	1527	1745	-1.379	424	1103	447	1298	0
2	11	3	"CUP5"	"YEL027W"	8630	14540	120	846	849	315	102	105	37	99	97	0	2168	2062	932	38	43	44	98	97	0	0.349	0.369	0.369	0.391	1.848	0.347	0.882	120	643	2874	2771	-1.517	744	2130	747	2024	0
2	12	3	"SOM1"	"YEL059C-A"	8830	14530	110	658	653	269	98	103	38	100	98	0	1612	1470	634	39	42	30	100	100	0	0.356	0.388	0.390	0.401	1.647	0.359	0.801	80	545	2133	1986	-1.490	560	1573	555	1431	0
2	13	3	"YDR543C"	"YDR543C"	9040	14540	90	284	311	126	102	106	34	100	92	0	326	362	214	40	42	23	98	94	0	0.636	0.649	0.750	0.734	2.139	0.590	0.534	52	409	468	531	-0.652	182	286	209	322	0
2	14	3	"YEL029C"	"YEL029C"	9230	14530	110	938	984	424	102	112	103	100	100	0	1558	1547	741	39	45	54	100	98	0	0.550	0.585	0.567	0.616	1.677	0.568	0.870	80	552	2355	2390	-0.862	836	1519	882	1508	0
2	15	3	"PRB1"	"YEL060C"	9430	14540	100	151	206	314	99	105	33	65	40	0	221	234	154	39	40	20	98	96	0	0.286	0.549	0.297	0.357	3.325	1.737	0.403	80	498	234	302	-1.807	52	182	107	195	0
2	16	3	"YRF1-1"	"YDR545W"	9650	14540	100	1473	1667	1167	101	105	34	100	100	0	3163	3560	2767	38	40	31	100	98	0	0.439	0.445	0.457	0.491	1.941	0.418	0.902	80	520	4497	5088	-1.188	1372	3125	1566	3522	0
2	17	3	"SPF1"	"YEL031W"	9830	14540	80	129	150	104	106	108	36	36	19	0	113	123	100	40	43	39	76	44	0	0.315	0.530	0.636	0.576	3.180	0.648	0.197	52	328	96	127	-1.666	23	73	44	83	0
2	18	3	"NPR2"	"YEL062W"	10020	14540	120	854	985	588	104	107	37	98	98	0	1606	1896	1270	40	41	23	99	99	0	0.479	0.475	0.458	0.510	1.808	0.453	0.897	120	627	2316	2737	-1.062	750	1566	881	1856	0
2	19	3	"PES4"	"YFR023W"	10220	14530	120	5533	5743	2685	101	106	37	100	100	0	2353	2565	1475	41	41	22	100	99	0	2.349	2.235	2.216	2.550	1.807	2.186	0.893	120	583	7744	8166	1.232	5432	2312	5642	2524	0
2	20	3	"HXK1"	"YFR053C"	10420	14530	110	1544	1516	686	103	110	40	100	98	0	3410	3225	1785	40	44	35	100	100	0	0.428	0.444	0.415	0.482	1.626	0.412	0.885	80	503	4811	4598	-1.226	1441	3370	1413	3185	0
2	21	3	"SCW11"	"YGL028C"	10620	14530	120	2594	2898	1443	102	106	38	100	100	0	2913	3099	1777	39	43	31	99	99	0	0.867	0.914	0.858	0.970	1.655	0.876	0.902	120	667	5366	5856	-0.206	2492	2874	2796	3060	0
2	1	4	"YFR024C-A"	"YFR024C-A"	6630	14730	90	551	538	175	99	104	40	100	100	0	485	473	231	41	44	29	100	98	0	1.018	1.016	0.992	1.096	1.644	0.923	0.730	52	400	896	871	0.026	452	444	439	432	0
2	2	4	"YFR055W"	"YFR055W"	6830	14740	120	2372	2375	956	94	98	33	100	100	0	5431	5212	2240	39	40	19	100	100	0	0.422	0.441	0.426	0.456	1.736	0.420	0.891	120	654	7670	7454	-1.243	2278	5392	2281	5173	0
2	3	4	"RPL30"	"YGL030W"	7040	14740	130	629	646	286	94	100	34	99	98	0	1277	1378	721	39	41	27	99	98	0	0.432	0.412	0.414	0.436	1.805	0.395	0.832	120	641	1773	1891	-1.210	535	1238	552	1339	0
2	4	4	"YFR026C"	"YFR026C"	7230	14740	130	2273	2218	575	100	104	43	100	100	0	5141	4433	1728	41	44	29	100	100	0	0.426	0.482	0.458	0.540	1.695	0.439	0.891	120	578	7273	6510	-1.231	2173	5100	2118	4392	0
2	5	4	"YFR057W"	"YFR057W"	7400	14740	90	239	288	169	99	102	32	88	78	0	300	432	365	40	44	25	92	92	0	0.538	0.482	0.526	0.533	2.641	0.427	0.671	52	379	400	581	-0.893	140	260	189	392	0
2	6	4	"AGA2"	"YGL032C"	7630	14740	120	1293	1224	405	97	101	33	100	100	0	3184	2860	1201	39	41	29	100	100	0	0.380	0.400	0.383	0.443	1.880	0.370	0.889	120	623	4341	3948	-1.395	1196	3145	1127	2821	0
2	7	4	"CDC14"	"YFR028C"	7830	14740	120	2514	2412	1090	102	107	41	100	100	0	4956	4553	2290	39	42	34	98	98	0	0.491	0.512	0.490	0.592	2.176	0.485	0.891	120	594	7329	6824	-1.028	2412	4917	2310	4514	0
2	8	4	"ERP6"	"YGL002W"	8020	14730	130	7086	6612	2135	105	110	53	100	100	0	3500	3090	1244	39	46	48	100	99	0	2.017	2.133	2.051	2.301	1.686	2.120	0.886	120	686	10442	9558	1.012	6981	3461	6507	3051	0
2	9	4	"YGL034C"	"YGL034C"	8250	14740	90	176	189	75	104	111	63	53	23	0	344	338	148	37	47	54	92	90	0	0.235	0.282	0.269	0.274	3.030	0.221	0.237	52	396	379	386	-2.092	72	307	85	301	0
2	10	4	"RPL11B"	"YGR085C"	8430	14740	120	2174	2097	714	104	111	60	100	100	0	6060	5314	2133	39	44	44	100	99	0	0.344	0.378	0.383	0.407	1.580	0.357	0.907	120	585	8091	7268	-1.540	2070	6021	1993	5275	0
2	11	4	"YGR117C"	"YGR117C"	8630	14740	120	4748	4521	1861	99	103	31	100	100	0	3250	2862	1416	39	40	20	99	99	0	1.448	1.566	1.454	1.909	2.361	1.552	0.857	120	583	7860	7245	0.534	4649	3211	4422	2823	0
2	12	4	"YGR149W"	"YGR149W"	8820	14730	110	4427	4021	1377	101	110	60	100	100	0	4148	3614	1535	39	51	114	100	98	0	1.053	1.097	1.034	1.161	1.552	1.053	0.899	80	557	8435	7495	0.074	4326	4109	3920	3575	0
2	13	4	"PDC6"	"YGR087C"	9020	14730	110	740	726	285	102	108	56	100	98	0	2741	2697	1406	40	58	160	98	93	0	0.236	0.235	0.222	0.265	1.918	0.203	0.824	80	542	3339	3281	-2.082	638	2701	624	2657	0
2	14	4	"NUP57"	"YGR119C"	9210	14740	120	4215	4240	1166	101	108	45	100	100	0	4081	3857	1482	40	50	109	99	98	0	1.018	1.084	0.968	1.204	1.779	1.027	0.874	120	632	8155	7956	0.026	4114	4041	4139	3817	0
2	15	4	"YGR151C"	"YGR151C"	9430	14730	120	687	647	289	100	105	32	95	94	0	1902	1613	857	39	41	23	97	96	0	0.315	0.348	0.341	0.376	2.063	0.325	0.862	120	630	2450	2121	-1.666	587	1863	547	1574	0
2	16	4	"YGR089W"	"YGR089W"	9630	14740	110	1051	1135	771	98	102	32	100	100	0	2860	3406	2445	39	40	19	100	98	0	0.338	0.308	0.304	0.351	2.105	0.299	0.871	80	545	3774	4404	-1.566	953	2821	1037	3367	0
2	17	4	"MEP1"	"YGR121C"	9830	14730	110	1000	1017	382	102	105	36	100	100	0	3416	3458	1802	40	42	23	100	100	0	0.266	0.268	0.265	0.303	1.744	0.235	0.863	80	566	4274	4333	-1.911	898	3376	915	3418	0
2	18	4	"YGR153W"	"YGR153W"	10030	14730	110	1085	1047	354	104	108	36	100	100	0	3745	3434	1559	39	42	29	100	100	0	0.265	0.278	0.274	0.310	1.705	0.248	0.861	80	539	4687	4338	-1.918	981	3706	943	3395	0
2	19	4	"PRP31"	"YGR091W"	10230	14730	110	1255	1286	361	101	105	34	100	100	0	3482	3074	1199	40	43	32	100	100	0	0.335	0.391	0.356	0.429	1.788	0.350	0.816	80	570	4596	4219	-1.577	1154	3442	1185	3034	0
2	20	4	"PPT1"	"YGR123C"	10460	14730	120	1011	933	381	102	108	39	96	95	0	3755	3332	1637	40	44	37	99	98	0	0.245	0.252	0.237	0.262	1.928	0.231	0.862	120	642	4624	4123	-2.031	909	3715	831	3292	0
2	21	4	"CYS4"	"YGR155W"	10630	14730	110	909	856	276	101	103	30	100	100	0	4499	3760	1758	39	47	86	100	98	0	0.181	0.203	0.197	0.232	1.707	0.177	0.819	80	520	5268	4476	-2.465	808	4460	755	3721	0
2	1	5	"SET1"	"YHR119W"	6630	14930	100	1803	2147	1241	95	99	31	100	100	0	1500	1749	1201	37	40	23	100	100	0	1.167	1.199	1.236	1.352	1.598	1.136	0.885	80	522	3171	3764	0.223	1708	1463	2052	1712	0
2	2	5	"YHR149C"	"YHR149C"	6840	14940	90	809	972	683	95	99	35	100	96	0	1132	1417	1115	39	46	50	94	90	0	0.653	0.636	0.607	0.762	2.129	0.602	0.861	52	388	1807	2255	-0.614	714	1093	877	1378	0
2	3	5	"YHR181W"	"YHR181W"	7020	14920	110	405	415	172	96	101	35	98	93	0	1261	1220	646	39	54	132	92	87	0	0.253	0.270	0.263	0.299	2.051	0.215	0.677	80	525	1531	1500	-1.984	309	1222	319	1181	0
2	4	5	"YHR121W"	"YHR121W"	7230	14920	120	190	254	181	97	102	41	64	53	0	279	785	991	41	47	112	57	50	0	0.391	0.211	0.263	0.353	3.023	0.175	0.768	120	625	331	901	-1.356	93	238	157	744	0
2	5	5	"YHR151C"	"YHR151C"	7430	14950	80	354	393	196	100	102	32	96	84	0	1137	1450	924	41	42	24	100	100	0	0.232	0.208	0.197	0.200	2.196	0.189	0.758	52	334	1350	1702	-2.109	254	1096	293	1409	0
2	6	5	"GND1"	"YHR183W"	7630	14930	110	1317	1311	554	95	102	48	100	100	0	1015	977	501	39	41	25	98	98	0	1.252	1.296	1.248	1.399	1.572	1.249	0.865	80	557	2198	2154	0.324	1222	976	1216	938	0
2	7	5	"EPT1"	"YHR123W"	7840	14940	100	259	283	138	96	100	34	91	82	0	417	427	273	39	41	22	93	91	0	0.431	0.482	0.449	0.532	2.427	0.442	0.673	80	486	541	575	-1.214	163	378	187	388	0
2	8	5	"SPO16"	"YHR153C"	8030	14940	100	595	609	345	102	106	39	95	87	0	1134	1207	867	37	41	33	95	90	0	0.449	0.433	0.433	0.507	2.430	0.394	0.829	80	496	1590	1677	-1.154	493	1097	507	1170	0
2	9	5	"ADY1"	"YHR185C"	8230	14940	80	191	209	93	99	102	31	84	63	0	250	262	155	38	39	19	96	90	0	0.434	0.491	0.431	0.481	3.430	0.467	0.525	52	340	304	334	-1.204	92	212	110	224	0
2	10	5	"YHR125W"	"YHR125W"	8430	14930	120	1533	1609	844	101	107	56	99	97	0	3715	3814	2167	40	43	33	96	96	0	0.390	0.400	0.394	0.452	2.105	0.384	0.923	120	626	5107	5282	-1.360	1432	3675	1508	3774	0
2	11	5	"YHR155W"	"YHR155W"	8640	14940	100	612	663	366	99	103	32	98	95	0	1826	1948	1291	38	40	21	100	100	0	0.287	0.295	0.280	0.333	1.907	0.269	0.839	80	494	2301	2474	-1.801	513	1788	564	1910	0
2	12	5	"IKI1"	"YHR187W"	8820	14940	90	229	236	74	99	102	32	96	82	0	546	517	319	38	39	19	98	98	0	0.256	0.286	0.277	0.313	2.387	0.180	0.435	52	406	638	616	-1.966	130	508	137	479	0
2	13	5	"YHC3"	"YJL059W"	9030	14930	110	2341	2563	1525	102	107	69	100	100	0	1562	1630	1034	39	43	45	100	97	0	1.470	1.547	1.508	1.718	1.808	1.562	0.893	80	584	3762	4052	0.556	2239	1523	2461	1591	0
2	14	5	"YJL091C"	"YJL091C"	9230	14930	100	396	409	171	101	107	51	96	90	0	446	511	277	40	44	39	98	96	0	0.727	0.654	0.722	0.698	1.776	0.621	0.826	80	483	701	779	-0.461	295	406	308	471	0
2	15	5	"YJL123C"	"YJL123C"	9430	14930	110	1276	1321	539	102	106	33	100	100	0	6572	5911	2683	39	43	32	100	100	0	0.180	0.208	0.197	0.230	1.735	0.197	0.869	80	542	7707	7091	-2.476	1174	6533	1219	5872	0
2	16	5	"NUP82"	"YJL061W"	9620	14930	110	1062	1137	573	100	106	38	100	98	0	2287	2703	1765	39	42	41	98	97	0	0.428	0.389	0.399	0.437	1.673	0.348	0.885	80	535	3210	3701	-1.225	962	2248	1037	2664	0
2	17	5	"TOK1"	"YJL093C"	9820	14940	120	1648	1580	570	100	104	35	100	100	0	4826	4743	2151	39	41	23	100	99	0	0.323	0.315	0.298	0.347	1.861	0.286	0.866	120	642	6335	6184	-1.629	1548	4787	1480	4704	0
2	18	5	"GCD14"	"YJL125C"	10030	14940	120	3110	2748	979	102	105	36	100	100	0	6235	5052	2561	38	40	22	98	96	0	0.485	0.528	0.494	0.700	2.446	0.475	0.904	120	629	9205	7660	-1.043	3008	6197	2646	5014	0
2	19	5	"MRPL8"	"YJL063C"	10220	14930	110	374	385	176	102	104	33	96	95	0	1849	1674	827	38	40	22	100	98	0	0.150	0.173	0.153	0.186	1.991	0.151	0.654	80	555	2083	1919	-2.735	272	1811	283	1636	0
2	20	5	"BCK1"	"YJL095W"	10440	14940	100	1207	1983	1669	102	104	34	100	100	0	2086	2859	2468	38	41	27	100	98	0	0.540	0.667	0.646	0.678	1.958	0.659	0.912	80	493	3153	4702	-0.890	1105	2048	1881	2821	0
2	21	5	"SPT10"	"YJL127C"	10620	14930	100	220	255	132	101	102	29	92	73	0	367	416	278	38	39	20	98	98	0	0.362	0.407	0.368	0.387	2.207	0.381	0.621	80	510	448	532	-1.467	119	329	154	378	0
2	1	6	"YJL065C"	"YJL065C"	6640	15130	130	332	333	136	96	100	39	93	86	0	2527	2108	1252	38	41	25	96	95	0	0.095	0.114	0.112	0.136	2.296	0.100	0.767	120	736	2725	2307	-3.399	236	2489	237	2070	0
2	2	6	"YJL097W"	"YJL097W"	6830	15130	120	1145	1105	378	95	99	31	100	99	0	3031	2672	1099	39	41	21	99	99	0	0.351	0.384	0.366	0.417	1.863	0.358	0.864	120	597	4042	3643	-1.511	1050	2992	1010	2633	0
2	3	6	"TRK1"	"YJL129C"	7040	15140	120	1084	1389	880	95	100	35	100	99	0	2469	3540	2911	40	50	116	99	96	0	0.407	0.370	0.357	0.424	2.031	0.317	0.850	120	654	3418	4794	-1.296	989	2429	1294	3500	0
2	4	6	"OAR1"	"YKL055C"	7230	15130	100	773	808	404	95	98	29	98	97	0	1750	1838	1166	40	43	25	100	100	0	0.396	0.397	0.371	0.446	2.171	0.335	0.736	80	482	2388	2511	-1.335	678	1710	713	1798	0
2	5	6	"CYT2"	"YKL087C"	7430	15130	100	733	762	348	95	98	28	100	98	0	1793	1890	1234	40	41	22	100	98	0	0.364	0.361	0.361	0.432	1.901	0.313	0.859	80	496	2391	2517	-1.458	638	1753	667	1850	0
2	6	6	"YKL118W"	"YKL118W"	7640	15140	130	704	680	224	93	99	43	100	99	0	1247	1128	475	38	41	25	98	98	0	0.505	0.539	0.539	0.602	2.005	0.503	0.839	120	677	1820	1677	-0.985	611	1209	587	1090	0
2	7	6	"NUP120"	"YKL057C"	7830	15130	110	691	742	373	97	104	48	98	97	0	1072	1218	879	40	43	29	100	98	0	0.576	0.548	0.507	0.636	1.979	0.471	0.828	80	529	1626	1823	-0.797	594	1032	645	1178	0
2	8	6	"MIF2"	"YKL089W"	8030	15130	110	1045	1202	608	101	107	36	100	100	0	3288	3644	2254	40	43	33	100	100	0	0.291	0.305	0.302	0.330	1.769	0.268	0.813	80	574	4192	4705	-1.783	944	3248	1101	3604	0
2	9	6	"OAC1"	"YKL120W"	8240	15140	90	275	310	141	97	101	31	92	86	0	493	604	415	39	40	21	98	98	0	0.392	0.377	0.361	0.397	2.002	0.320	0.696	52	378	632	778	-1.351	178	454	213	565	0
2	10	6	"YKL059C"	"YKL059C"	8430	15130	100	937	1231	751	99	102	33	100	100	0	1787	2065	1466	39	40	20	100	100	0	0.479	0.559	0.528	0.605	1.666	0.523	0.794	80	510	2586	3158	-1.061	838	1748	1132	2026	0
2	11	6	"YKL091C"	"YKL091C"	8650	15140	80	298	322	143	99	104	41	90	80	0	951	1164	770	38	41	25	100	100	0	0.218	0.198	0.200	0.215	2.173	0.158	0.585	52	340	1112	1349	-2.198	199	913	223	1126	0
2	12	6	"SRP21"	"YKL122C"	8840	15130	90	776	806	341	100	103	33	100	100	0	1120	1223	660	39	42	24	100	100	0	0.625	0.596	0.537	0.654	1.797	0.549	0.775	52	406	1757	1890	-0.677	676	1081	706	1184	0
2	13	6	"YKL061W"	"YKL061W"	9020	15130	110	3263	2970	1142	101	111	70	100	100	0	1576	1357	647	39	43	32	100	98	0	2.057	2.177	2.107	2.473	1.699	2.092	0.908	80	556	4699	4187	1.041	3162	1537	2869	1318	0
2	14	6	"MBR1"	"YKL093W"	9230	15140	130	6997	6637	2566	103	109	47	100	100	0	4867	4460	1999	41	45	36	100	100	0	1.429	1.479	1.461	1.636	1.537	1.475	0.920	120	692	11720	10953	0.515	6894	4826	6534	4419	0
2	15	6	"SSH4"	"YKL124W"	9430	15140	120	3179	3218	1066	100	109	59	100	100	0	6664	5990	2667	40	43	39	98	98	0	0.465	0.524	0.493	0.617	2.197	0.473	0.844	120	628	9703	9068	-1.105	3079	6624	3118	5950	0
2	16	6	"YLR040C"	"YLR040C"	9640	15130	110	847	864	388	101	107	60	98	97	0	1298	1449	854	40	43	41	98	98	0	0.593	0.542	0.535	0.592	1.682	0.495	0.845	80	553	2004	2172	-0.754	746	1258	763	1409	0
2	17	6	"YLR072W"	"YLR072W"	9830	15130	90	173	193	76	100	102	31	80	53	0	269	287	128	41	41	21	96	96	0	0.320	0.378	0.344	0.347	2.554	0.353	0.369	52	396	301	339	-1.643	73	228	93	246	0
2	18	6	"YLR104W"	"YLR104W"	10040	15130	90	614	563	248	103	109	48	96	86	0	947	930	545	41	43	25	98	98	0	0.564	0.517	0.525	0.546	1.798	0.464	0.812	52	392	1417	1349	-0.826	511	906	460	889	0
2	19	6	"YLR042C"	"YLR042C"	10230	15140	120	1908	1796	833	100	103	34	100	100	0	3010	2547	1457	39	43	77	95	90	0	0.609	0.676	0.671	0.840	2.293	0.629	0.893	120	591	4779	4204	-0.717	1808	2971	1696	2508	0
2	20	6	"YLR074C"	"YLR074C"	10440	15130	100	278	305	195	100	104	36	87	77	0	663	816	607	38	40	29	91	90	0	0.285	0.263	0.265	0.312	2.150	0.252	0.704	80	505	803	983	-1.812	178	625	205	778	0
2	21	6	"YLR106C"	"YLR106C"	10640	15140	110	503	504	233	99	103	35	97	92	0	901	963	623	37	40	27	98	97	0	0.468	0.437	0.447	0.476	2.001	0.400	0.814	80	600	1268	1331	-1.097	404	864	405	926	0
2	1	7	"PDC1"	"YLR044C"	6630	15340	110	446	485	243	98	102	39	98	97	0	1132	1263	879	38	41	22	98	98	0	0.318	0.316	0.297	0.355	2.641	0.266	0.739	80	590	1442	1612	-1.652	348	1094	387	1225	0
2	2	7	"YLR076C"	"YLR076C"	6830	15330	110	689	656	248	99	102	36	100	98	0	1928	1641	895	39	43	32	98	97	0	0.312	0.348	0.356	0.428	2.286	0.305	0.806	80	592	2479	2159	-1.679	590	1889	557	1602	0
2	3	7	"YLR108C"	"YLR108C"	7050	15340	80	722	745	316	98	104	39	100	98	0	1833	1748	1023	41	46	42	100	100	0	0.348	0.379	0.368	0.434	1.922	0.325	0.806	52	334	2416	2354	-1.522	624	1792	647	1707	0
2	4	7	"YLR046C"	"YLR046C"	7230	15330	110	804	844	332	99	103	34	100	100	0	2725	2507	1332	40	51	167	97	95	0	0.263	0.302	0.300	0.343	1.880	0.275	0.859	80	550	3390	3212	-1.929	705	2685	745	2467	0
2	5	7	"BOS1"	"YLR078C"	7440	15340	120	2467	2222	929	97	99	29	100	100	0	2834	2464	1308	39	46	160	95	94	0	0.848	0.876	0.845	0.973	2.034	0.820	0.859	120	598	5165	4550	-0.238	2370	2795	2125	2425	0
2	6	7	"YLR110C"	"YLR110C"	7630	15330	120	471	451	182	94	98	31	95	92	0	2161	1941	1107	38	40	23	99	98	0	0.178	0.188	0.186	0.214	2.097	0.165	0.830	120	567	2500	2260	-2.493	377	2123	357	1903	0
2	7	7	"YLR423C"	"YLR423C"	7840	15340	120	1789	1982	968	95	100	32	100	100	0	2771	2929	1537	37	40	24	100	99	0	0.620	0.652	0.636	0.693	1.754	0.632	0.904	120	596	4428	4779	-0.691	1694	2734	1887	2892	0
2	8	7	"YLR455W"	"YLR455W"	8030	15330	110	1032	1001	462	100	105	37	100	98	0	2723	2623	1423	37	42	33	100	100	0	0.347	0.348	0.335	0.390	1.704	0.310	0.838	80	539	3618	3487	-1.527	932	2686	901	2586	0
2	9	7	"PSP2"	"YML017W"	8240	15320	150	112	121	54	99	102	32	24	13	0	51	72	68	37	40	24	39	24	0	0.929	0.629	0.824	0.863	3.803	0.867	0.186	156	824	27	57	-0.107	13	14	22	35	-50
2	10	7	"TUS1"	"YLR425W"	8420	15330	110	452	492	310	99	102	31	93	86	0	1114	1339	1225	38	40	23	98	97	0	0.328	0.302	0.293	0.313	2.161	0.257	0.825	80	527	1429	1694	-1.608	353	1076	393	1301	0
2	11	7	"NBP1"	"YLR457C"	8630	15340	110	575	681	353	98	104	60	100	97	0	1389	1653	1189	38	44	94	100	93	0	0.353	0.361	0.335	0.431	2.075	0.313	0.836	80	592	1828	2198	-1.502	477	1351	583	1615	0
2	12	7	"OST6"	"YML019W"	8840	15330	110	3848	3727	1711	99	104	46	100	100	0	2618	2458	1276	39	39	18	100	100	0	1.454	1.500	1.443	1.656	1.810	1.482	0.870	80	567	6328	6047	0.540	3749	2579	3628	2419	0
2	13	7	"YLR427W"	"YLR427W"	9020	15330	110	931	906	398	100	104	39	98	97	0	4160	3976	2251	39	40	21	98	98	0	0.202	0.205	0.199	0.242	1.972	0.183	0.891	80	542	4952	4743	-2.310	831	4121	806	3937	0
2	14	7	"CDC91"	"YLR459W"	9240	15330	100	1456	1385	759	102	106	40	98	98	0	3098	3575	2426	39	43	33	100	100	0	0.443	0.363	0.381	0.398	2.098	0.328	0.884	80	494	4413	4819	-1.176	1354	3059	1283	3536	0
2	15	7	"UNG1"	"YML021C"	9450	15330	110	2683	2664	1085	98	105	42	100	100	0	4933	4563	2064	40	41	20	100	100	0	0.528	0.567	0.580	0.590	1.665	0.548	0.904	80	498	7478	7089	-0.921	2585	4893	2566	4523	0
2	16	7	"CRN1"	"YLR429W"	9630	15330	120	849	887	383	96	100	30	98	98	0	4645	4467	2298	40	41	22	100	100	0	0.164	0.179	0.170	0.193	1.817	0.162	0.844	120	618	5358	5218	-2.612	753	4605	791	4427	0
2	17	7	"PAU4"	"YLR461W"	9860	15330	120	12829	11313	4966	99	102	31	100	100	0	17125	14893	6742	41	43	27	100	100	0	0.745	0.755	0.746	0.801	1.786	0.743	0.918	120	657	29814	26066	-0.424	12730	17084	11214	14852	0
2	18	7	"YML023C"	"YML023C"	10060	15330	110	3673	3474	1342	102	106	44	100	100	0	4177	3574	1856	40	46	84	100	100	0	0.863	0.954	0.921	1.129	1.899	0.878	0.879	80	506	7708	6906	-0.212	3571	4137	3372	3534	0
2	19	7	"YMR187C"	"YMR187C"	10240	15320	150	135	243	235	101	103	33	50	33	0	59	254	391	38	43	69	37	28	0	1.619	0.657	0.833	1.053	3.041	0.553	0.770	156	752	55	358	0.695	34	21	142	216	-50
2	20	7	"TRS130"	"YMR218C"	10440	15330	80	212	252	173	103	106	31	84	71	0	353	361	217	39	40	21	96	84	0	0.347	0.463	0.427	0.427	2.458	0.500	0.366	52	331	423	471	-1.526	109	314	149	322	0
2	21	7	"YMR251W"	"YMR251W"	10650	15330	80	169	204	101	99	102	29	84	65	0	235	237	111	38	40	22	94	94	0	0.355	0.528	0.507	0.461	2.647	0.614	0.324	52	335	267	304	-1.493	70	197	105	199	0
2	1	8	"GCV2"	"YMR189W"	6650	15540	80	372	387	161	98	103	48	98	88	0	493	479	274	37	40	21	98	98	0	0.601	0.654	0.665	0.755	2.315	0.621	0.672	52	340	730	731	-0.735	274	456	289	442	0
2	2	8	"ERG8"	"YMR220W"	6840	15540	80	1309	1642	1233	97	101	32	100	100	0	1791	2347	2011	38	42	26	100	98	0	0.691	0.669	0.688	0.798	2.117	0.623	0.877	52	337	2965	3854	-0.532	1212	1753	1545	2309	0
2	3	8	"YMR252C"	"YMR252C"	7040	15530	100	665	732	401	96	103	43	97	95	0	1016	1211	811	41	45	29	98	98	0	0.584	0.544	0.515	0.597	1.964	0.491	0.806	80	519	1544	1806	-0.777	569	975	636	1170	0
2	4	8	"YMR191W"	"YMR191W"	7270	15520	110	224	254	192	98	102	37	86	71	0	512	537	334	40	44	26	95	93	0	0.267	0.314	0.286	0.294	2.222	0.359	0.528	80	548	598	653	-1.905	126	472	156	497	0
2	5	8	"YMR222C"	"YMR222C"	7440	15520	110	180	259	203	98	102	41	55	50	0	191	423	487	40	40	18	70	58	0	0.543	0.420	0.483	0.559	2.739	0.384	0.715	80	514	233	544	-0.881	82	151	161	383	0
2	6	8	"YMR254C"	"YMR254C"	7660	15520	90	471	455	164	96	101	39	100	98	0	1470	1369	661	38	47	77	96	90	0	0.262	0.270	0.259	0.311	1.853	0.245	0.841	52	394	1807	1690	-1.933	375	1432	359	1331	0
2	7	8	"YMR193C-A"	"YMR193C-A"	7850	15530	120	471	463	200	96	100	36	94	90	0	2872	2660	1323	38	45	64	98	97	0	0.132	0.140	0.138	0.143	1.772	0.131	0.829	120	601	3209	2989	-2.918	375	2834	367	2622	0
2	8	8	"MRE11"	"YMR224C"	8070	15530	90	173	206	113	97	102	34	80	53	0	191	189	118	39	41	22	84	76	0	0.500	0.727	0.737	0.779	2.521	0.765	0.406	52	409	228	259	-1.000	76	152	109	150	0
2	9	8	"COX7"	"YMR256C"	8260	15520	110	563	517	227	98	105	46	95	87	0	697	588	357	38	43	40	86	80	0	0.706	0.762	0.762	0.897	1.936	0.687	0.853	80	567	1124	969	-0.503	465	659	419	550	0
2	10	8	"NAR1"	"YNL240C"	8480	15530	110	760	794	338	99	106	58	100	98	0	2112	2044	1044	39	48	100	98	96	0	0.319	0.347	0.360	0.390	1.806	0.320	0.870	80	555	2734	2700	-1.649	661	2073	695	2005	0
2	11	8	"SEC2"	"YNL272C"	8680	15530	100	2765	2714	1712	101	110	68	98	95	0	3269	3365	2550	39	52	116	92	81	0	0.825	0.786	0.820	1.061	2.159	0.716	0.853	80	516	5894	5939	-0.278	2664	3230	2613	3326	0
2	12	8	"YPT11"	"YNL304W"	8880	15530	100	2217	1915	969	100	106	53	100	98	0	4325	3522	2204	40	44	32	100	100	0	0.494	0.521	0.523	0.591	1.935	0.475	0.873	80	472	6402	5297	-1.017	2117	4285	1815	3482	0
2	13	8	"YNL242W"	"YNL242W"	9070	15530	140	1799	2074	1120	97	101	39	100	100	0	2919	3172	1715	40	44	35	100	98	0	0.591	0.631	0.601	0.649	1.675	0.615	0.832	156	701	4581	5109	-0.758	1702	2879	1977	3132	0
2	14	8	"YNL274C"	"YNL274C"	9250	15530	120	4902	4718	1610	103	107	43	100	100	0	3943	3722	1450	41	46	45	100	100	0	1.230	1.254	1.181	1.321	1.523	1.237	0.897	120	582	8701	8296	0.299	4799	3902	4615	3681	0
2	15	8	"YNL306W"	"YNL306W"	9460	15520	110	697	691	202	97	102	39	100	100	0	4743	4126	1796	40	42	24	100	100	0	0.128	0.145	0.140	0.164	1.696	0.129	0.856	80	554	5303	4680	-2.971	600	4703	594	4086	0
2	16	8	"SUI1"	"YNL244C"	9660	15520	110	399	424	164	97	102	31	100	100	0	2287	2034	884	39	41	27	100	100	0	0.134	0.164	0.152	0.175	1.855	0.146	0.742	80	541	2550	2322	-2.896	302	2248	327	1995	0
2	17	8	"YNL276C"	"YNL276C"	9860	15520	100	391	397	188	96	101	36	91	87	0	1156	1131	736	38	40	27	97	97	0	0.264	0.275	0.281	0.292	1.948	0.249	0.844	80	490	1413	1394	-1.922	295	1118	301	1093	0
2	18	8	"KRI1"	"YNL308C"	10070	15530	100	841	1013	592	101	104	36	100	98	0	1351	1659	1119	38	40	21	100	100	0	0.564	0.563	0.560	0.599	1.731	0.533	0.891	80	517	2053	2533	-0.827	740	1313	912	1621	0
2	19	8	"YNL246W"	"YNL246W"	10280	15520	120	1564	1443	552	101	104	34	99	98	0	4410	3822	1647	40	42	25	100	100	0	0.335	0.355	0.349	0.357	1.640	0.337	0.903	120	599	5833	5124	-1.579	1463	4370	1342	3782	0
2	20	8	"YNL278W"	"YNL278W"	10480	15520	120	1310	1358	734	101	104	32	100	100	0	2976	3019	1939	39	45	70	95	94	0	0.412	0.422	0.397	0.527	2.491	0.378	0.820	120	609	4146	4237	-1.281	1209	2937	1257	2980	0
2	21	8	"YNL310C"	"YNL310C"	10670	15510	110	984	898	344	104	107	37	98	97	0	3190	2758	1364	39	42	26	100	100	0	0.279	0.292	0.283	0.324	1.680	0.265	0.859	80	561	4031	3513	-1.840	880	3151	794	2719	0
2	1	9	"YOR042W"	"YOR042W"	6680	15720	90	353	362	129	97	101	48	98	94	0	1260	1195	650	37	41	55	98	96	0	0.209	0.229	0.231	0.271	2.072	0.201	0.737	52	412	1479	1423	-2.256	256	1223	265	1158	0
2	2	9	"CDC21"	"YOR074C"	6880	15720	100	863	919	582	94	101	44	92	91	0	1263	1348	1062	37	41	31	97	91	0	0.627	0.629	0.656	0.754	2.365	0.571	0.859	80	467	1995	2136	-0.673	769	1226	825	1311	0
2	3	9	"VAM3"	"YOR106W"	7030	15710	90	1851	1938	797	101	164	271	100	94	0	5989	5655	2926	44	307	1148	88	80	0	0.294	0.327	0.329	0.382	1.788	0.282	0.885	52	364	7695	7448	-1.764	1750	5945	1837	5611	0
2	4	9	"YOR044W"	"YOR044W"	7270	15720	110	2230	1993	782	97	104	52	100	100	0	2075	1742	964	40	49	87	97	91	0	1.048	1.114	1.111	1.359	1.815	1.006	0.864	80	599	4168	3598	0.068	2133	2035	1896	1702	0
2	5	9	"YOR076C"	"YOR076C"	7470	15720	100	764	925	676	94	100	42	96	92	0	893	1176	1100	39	41	20	93	88	0	0.785	0.731	0.863	0.997	2.408	0.645	0.852	80	521	1524	1968	-0.350	670	854	831	1137	0
2	6	9	"YOR108W"	"YOR108W"	7660	15720	80	246	254	84	96	101	31	98	86	0	689	718	424	39	42	24	100	98	0	0.231	0.233	0.235	0.266	1.866	0.204	0.727	52	340	800	837	-2.115	150	650	158	679	0
2	7	9	"DBP5"	"YOR046C"	7870	15720	120	1295	1643	1458	96	100	32	94	90	0	972	1641	1625	39	41	22	90	85	0	1.285	0.966	0.959	1.173	2.688	0.917	0.869	120	609	2132	3149	0.362	1199	933	1547	1602	0
2	8	9	"YOR078W"	"YOR078W"	8050	15720	110	1112	1054	371	96	99	31	100	98	0	3233	3052	1408	38	40	24	100	100	0	0.318	0.318	0.306	0.353	1.567	0.286	0.889	80	527	4211	3972	-1.653	1016	3195	958	3014	0
2	9	9	"YOR110W"	"YOR110W"	8250	15730	100	595	565	224	98	105	43	98	96	0	1455	1401	794	39	42	27	98	97	0	0.351	0.343	0.371	0.407	1.967	0.298	0.824	80	487	1913	1829	-1.511	497	1416	467	1362	0
2	10	9	"RAT1"	"YOR048C"	8440	15720	150	100	117	57	97	104	46	17	9	0	44	73	97	40	45	53	17	11	0	0.750	0.606	0.927	0.863	3.522	0.606	0.121	156	881	7	53	-0.415	3	4	20	33	-50
2	11	9	"YOR080W"	"YOR080W"	8660	15740	90	1369	1421	652	100	110	51	100	98	0	2881	2776	1785	41	52	85	96	94	0	0.447	0.483	0.485	0.603	1.947	0.413	0.836	52	420	4109	4056	-1.162	1269	2840	1321	2735	0
2	12	9	"YOR112W"	"YOR112W"	8880	15730	100	527	565	360	99	104	49	90	85	0	1466	1735	1433	40	43	29	97	92	0	0.300	0.275	0.294	0.326	2.148	0.241	0.820	80	493	1854	2161	-1.736	428	1426	466	1695	0
2	13	9	"PHO85"	"YPL031C"	9060	15720	110	791	767	249	100	101	33	98	98	0	3202	2973	1308	40	44	36	100	98	0	0.219	0.227	0.216	0.246	1.622	0.202	0.837	80	526	3853	3600	-2.194	691	3162	667	2933	0
2	14	9	"YPL063W"	"YPL063W"	9280	15720	90	895	867	347	104	106	37	100	98	0	3821	3536	1614	41	46	48	100	96	0	0.209	0.218	0.216	0.244	1.974	0.204	0.846	52	384	4571	4258	-2.257	791	3780	763	3495	0
2	15	9	"YPL095C"	"YPL095C"	9460	15730	120	1266	1482	1152	100	104	34	94	90	0	1194	2010	1955	39	41	21	91	85	0	1.010	0.701	0.725	0.946	2.806	0.620	0.870	120	616	2321	3353	0.014	1166	1155	1382	1971	0
2	16	9	"YPL033C"	"YPL033C"	9660	15730	130	3187	3088	1568	98	103	33	100	99	0	1646	1594	1067	39	40	22	92	90	0	1.922	1.923	1.884	2.524	2.220	1.803	0.879	120	670	4696	4545	0.943	3089	1607	2990	1555	0
2	17	9	"VPS28"	"YPL065W"	9860	15730	130	1906	1708	723	102	105	33	100	100	0	3528	3653	1797	39	40	19	100	99	0	0.517	0.444	0.452	0.469	1.706	0.422	0.887	120	636	5293	5220	-0.952	1804	3489	1606	3614	0
2	18	9	"MSY1"	"YPL097W"	10030	15730	100	1422	1496	823	101	104	33	98	96	0	3019	4003	2816	40	42	26	98	98	0	0.443	0.352	0.333	0.383	2.436	0.309	0.854	80	484	4300	5358	-1.173	1321	2979	1395	3963	0
2	19	9	"YPL035C"	"YPL035C"	10260	15720	110	1565	1474	588	102	105	36	100	98	0	1934	1716	877	39	45	85	96	93	0	0.772	0.818	0.843	0.969	1.749	0.777	0.881	80	595	3358	3049	-0.373	1463	1895	1372	1677	0
2	20	9	"YPL067C"	"YPL067C"	10470	15720	100	394	397	128	99	102	34	97	96	0	1866	1612	737	38	59	298	88	81	0	0.161	0.189	0.179	0.216	2.095	0.169	0.745	80	517	2123	1872	-2.631	295	1828	298	1574	0
2	21	9	"YPL099C"	"YPL099C"	10670	15730	100	544	559	254	101	109	116	92	78	0	1299	1346	715	38	40	20	100	100	0	0.351	0.350	0.368	0.355	1.740	0.331	0.583	80	503	1704	1766	-1.509	443	1261	458	1308	0
2	1	10	"EGD1"	"YPL037C"	6650	15920	130	597	552	174	95	98	31	100	99	0	1800	1613	583	37	41	43	100	99	0	0.285	0.290	0.280	0.302	1.604	0.273	0.858	120	797	2265	2033	-1.812	502	1763	457	1576	0
2	2	10	"BTS1"	"YPL069C"	6860	15930	120	5016	4594	1709	95	98	33	100	100	0	3592	3133	1450	37	40	21	100	100	0	1.384	1.453	1.420	1.681	1.839	1.416	0.909	120	610	8476	7595	0.469	4921	3555	4499	3096	0
2	3	10	"YPL101W"	"YPL101W"	7050	15930	120	1515	1364	593	97	110	87	100	95	0	6307	5344	2577	39	58	177	100	98	0	0.226	0.239	0.235	0.253	1.469	0.226	0.903	120	648	7686	6572	-2.144	1418	6268	1267	5305	0
2	4	10	"RPS23B"	"YPR132W"	7280	15930	100	1281	1216	662	99	103	46	97	95	0	2133	2015	1400	40	45	45	96	91	0	0.565	0.566	0.545	0.667	1.999	0.515	0.900	80	516	3275	3092	-0.824	1182	2093	1117	1975	0
2	5	10	"KIM3"	"YPR164W"	7470	15930	90	4434	6270	6757	97	102	35	100	100	0	2312	2771	2407	40	41	27	98	94	0	1.909	2.260	2.143	2.333	1.625	2.723	0.822	52	408	6609	8904	0.933	4337	2272	6173	2731	0
2	6	10	"YPR196W"	"YPR196W"	7690	15920	80	701	678	445	96	101	34	94	88	0	1407	1611	1284	39	41	21	86	84	0	0.442	0.370	0.411	0.529	2.358	0.348	0.910	52	327	1973	2154	-1.177	605	1368	582	1572	0
2	7	10	"MSS18"	"YPR134W"	7860	15930	110	1178	1176	426	99	105	68	100	100	0	3168	2780	1154	40	46	50	100	100	0	0.345	0.393	0.378	0.410	1.476	0.371	0.923	80	546	4207	3817	-1.536	1079	3128	1077	2740	0
2	8	10	"MRP2"	"YPR166C"	8060	15920	110	600	565	238	99	100	30	97	91	0	1486	1367	795	37	41	28	98	96	0	0.346	0.350	0.353	0.391	1.815	0.319	0.863	80	600	1950	1796	-1.532	501	1449	466	1330	0
2	9	10	"SGE1"	"YPR198W"	8270	15930	80	1730	1718	693	98	103	31	100	100	0	2041	2024	1014	38	39	20	98	96	0	0.815	0.816	0.817	0.878	1.466	0.775	0.918	52	334	3635	3606	-0.296	1632	2003	1620	1986	0
2	10	10	"YPR136C"	"YPR136C"	8450	15930	100	495	521	241	97	101	33	97	96	0	598	653	376	39	40	19	98	95	0	0.712	0.691	0.682	0.769	1.999	0.643	0.825	80	492	957	1038	-0.490	398	559	424	614	0
2	11	10	"NUT2"	"YPR168W"	8660	15940	80	165	192	87	102	106	34	67	48	0	196	277	228	38	40	21	94	78	0	0.399	0.377	0.241	0.336	3.946	0.235	0.244	52	334	221	329	-1.327	63	158	90	239	0
2	12	10	"ARR2"	"YPR200C"	8860	15920	110	533	520	191	100	106	36	98	97	0	1916	1744	692	40	42	22	100	100	0	0.231	0.246	0.232	0.253	1.677	0.228	0.824	80	584	2309	2124	-2.115	433	1876	420	1704	0
2	13	10	"MEP3"	"YPR138C"	9070	15920	110	1508	1331	527	101	107	40	100	100	0	5175	4622	2509	42	49	45	100	100	0	0.274	0.269	0.264	0.310	1.669	0.244	0.900	80	566	6540	5810	-1.867	1407	5133	1230	4580	0
2	14	10	"YPR170C"	"YPR170C"	9260	15930	110	814	762	306	99	105	39	98	96	0	1885	1733	824	40	47	44	98	98	0	0.388	0.392	0.389	0.402	1.532	0.379	0.900	80	576	2560	2356	-1.368	715	1845	663	1693	0
2	15	10	"YPR202W"	"YPR202W"	9460	15930	110	12846	12185	4392	101	104	32	100	100	0	26982	23652	9946	40	42	21	100	100	0	0.473	0.512	0.496	0.563	1.427	0.489	0.942	80	534	39687	35696	-1.080	12745	26942	12084	23612	0
2	16	10	"IntYBR048W"	"IntYBR048W"	9650	15930	100	2740	2728	819	98	101	33	100	100	0	3423	3297	1167	39	40	19	100	100	0	0.781	0.807	0.790	0.834	1.291	0.776	0.944	80	497	6026	5888	-0.357	2642	3384	2630	3258	0
2	17	10	"LSR1"	"LSR1"	9860	15920	110	540	579	234	101	111	98	100	90	0	1692	1959	1071	39	55	177	98	95	0	0.266	0.249	0.253	0.269	1.555	0.223	0.835	80	571	2092	2398	-1.913	439	1653	478	1920	0
2	18	10	"YCLWTy5-1C"	"YCLWTy5-1C"	10080	15930	90	3848	3459	1476	101	122	141	100	100	0	5841	5694	3115	40	71	240	100	98	0	0.646	0.594	0.606	0.660	1.491	0.546	0.923	52	415	9548	9012	-0.631	3747	5801	3358	5654	0
2	19	10	"IntYCR097W-A2"	"IntYCR097W-A2"	10280	15920	80	227	254	122	101	103	29	94	82	0	341	317	149	38	39	18	94	94	0	0.416	0.548	0.525	0.538	2.091	0.260	0.261	52	340	429	432	-1.266	126	303	153	279	0
2	20	10	"IntYDL191W"	"IntYDL191W"	10460	15930	80	166	171	50	99	104	34	80	50	0	189	194	65	38	39	19	100	100	0	0.444	0.462	0.461	0.441	2.290	0.441	0.281	52	340	218	228	-1.172	67	151	72	156	0
2	21	10	"CEN4"	"CEN4"	10680	15920	110	307	626	1669	99	109	108	80	46	0	213	486	1694	39	40	22	90	82	0	1.195	1.179	1.250	1.470	2.236	0.999	0.974	80	580	382	974	0.257	208	174	527	447	0
2	1	11	"YDRWdelta31"	"YDRWdelta31"	6660	16130	80	188	251	252	91	96	30	86	75	0	136	180	94	37	40	26	96	88	0	0.980	1.119	0.667	0.706	3.626	2.923	0.241	52	340	196	303	-0.029	97	99	160	143	0
2	2	11	"YELCtau1"	"YELCtau1"	6860	16130	110	3284	3309	1269	93	96	29	100	100	0	1543	1460	709	38	41	27	100	100	0	2.120	2.262	2.075	2.545	1.746	2.228	0.855	80	534	4696	4638	1.084	3191	1505	3216	1422	0
2	3	11	"YER039C-A"	"YER039C-A"	7060	16130	120	611	603	281	98	101	33	95	92	0	2027	1960	1026	40	42	25	98	97	0	0.258	0.263	0.254	0.269	1.894	0.247	0.833	120	597	2500	2425	-1.954	513	1987	505	1920	0
2	4	11	"YFLWtau1"	"YFLWtau1"	7270	16130	120	3474	3300	1762	101	105	46	99	99	0	1795	1566	1017	40	42	26	94	92	0	1.922	2.096	1.960	2.527	2.232	2.071	0.841	120	610	5128	4725	0.943	3373	1755	3199	1526	0
2	5	11	"YFRCdelta9"	"YFRCdelta9"	7470	16120	110	860	810	318	99	105	48	100	97	0	986	900	494	40	43	24	100	97	0	0.804	0.827	0.843	0.975	2.039	0.756	0.843	80	555	1707	1571	-0.314	761	946	711	860	0
2	6	11	"YGLWtau2"	"YGLWtau2"	7670	16130	100	377	371	182	100	136	258	52	5	0	547	566	327	38	102	509	50	7	0	0.544	0.513	0.462	0.581	2.507	0.492	0.728	80	525	786	799	-0.878	277	509	271	528	0
2	7	11	"iYAR061W"	"iYAR061W"	7890	16130	100	4086	3874	2590	101	153	303	91	87	0	5216	4792	3466	39	120	549	83	73	0	0.770	0.794	0.763	0.976	2.230	0.733	0.861	80	496	9162	8526	-0.378	3985	5177	3773	4753	0
2	8	11	"iYAR068W"	"iYAR068W"	8070	16140	110	937	1221	797	98	103	35	100	100	0	2268	3008	2309	38	44	54	100	98	0	0.376	0.378	0.368	0.438	1.684	0.347	0.916	80	536	3069	4093	-1.410	839	2230	1123	2970	0
2	9	11	"iYBL111C"	"iYBL111C"	8280	16130	100	3781	6549	6108	99	103	34	98	97	0	5490	10913	11427	39	40	19	98	98	0	0.675	0.593	0.595	0.820	2.210	0.550	0.947	80	484	9133	17324	-0.566	3682	5451	6450	10874	0
2	10	11	"iYBL098W"	"iYBL098W"	8460	16120	110	1419	1524	659	99	104	36	100	100	0	3023	3041	1348	40	41	22	100	100	0	0.443	0.475	0.473	0.485	1.380	0.470	0.912	80	544	4303	4426	-1.176	1320	2983	1425	3001	0
2	11	11	"iYBL092W"	"iYBL092W"	8670	16120	110	821	882	436	100	102	31	100	100	0	1679	1717	976	38	40	21	100	100	0	0.439	0.466	0.471	0.508	1.495	0.441	0.893	80	556	2362	2461	-1.187	721	1641	782	1679	0
2	12	11	"iYBL089W"	"iYBL089W"	8860	16130	100	735	770	331	96	103	36	100	100	0	1525	1572	877	40	42	23	100	98	0	0.430	0.440	0.479	0.503	1.660	0.400	0.891	80	504	2124	2206	-1.217	639	1485	674	1532	0
2	13	11	"iYBL071C"	"iYBL071C"	9070	16120	100	339	362	168	99	104	36	92	83	0	1091	1060	603	39	42	24	98	98	0	0.228	0.258	0.246	0.263	1.964	0.243	0.787	80	526	1292	1284	-2.132	240	1052	263	1021	0
2	14	11	"iYBL065W"	"iYBL065W"	9280	16120	90	180	187	67	100	104	34	76	59	0	947	882	459	41	42	26	98	98	0	0.088	0.103	0.106	0.105	3.473	0.090	0.410	52	401	986	928	-3.501	80	906	87	841	0
2	15	11	"iYBL060W"	"iYBL060W"	9460	16120	100	589	612	256	99	102	35	98	97	0	2224	2466	1211	40	41	23	100	98	0	0.224	0.211	0.200	0.226	1.707	0.200	0.849	80	503	2674	2939	-2.156	490	2184	513	2426	0
2	16	11	"iYBL042C"	"iYBL042C"	9680	16130	110	531	579	243	99	104	41	100	98	0	2092	2183	1126	39	42	27	100	100	0	0.210	0.224	0.211	0.234	1.812	0.204	0.803	80	568	2485	2624	-2.249	432	2053	480	2144	0
2	17	11	"iYBL038W"	"iYBL038W"	9870	16120	110	969	903	437	101	106	40	100	98	0	3056	2727	1665	39	41	23	100	98	0	0.288	0.298	0.303	0.371	1.979	0.269	0.885	80	549	3885	3490	-1.797	868	3017	802	2688	0
2	18	11	"iYBL034C"	"iYBL034C"	10060	16120	100	434	459	209	101	106	52	97	93	0	1331	1238	582	40	41	23	98	97	0	0.258	0.299	0.287	0.312	1.975	0.288	0.774	80	507	1624	1556	-1.955	333	1291	358	1198	0
2	19	11	"iYBR265W"	"iYBR265W"	10270	16120	110	401	384	152	100	104	32	92	88	0	1243	1072	612	38	41	35	97	92	0	0.250	0.275	0.271	0.299	1.916	0.242	0.830	80	602	1506	1318	-2.001	301	1205	284	1034	0
2	20	11	"iYBR270C"	"iYBR270C"	10480	16120	110	803	928	628	100	107	48	95	90	0	1643	2098	1699	38	43	38	93	90	0	0.438	0.402	0.433	0.483	2.479	0.376	0.921	80	586	2308	2888	-1.191	703	1605	828	2060	0
2	21	11	"iYBR274W"	"iYBR274W"	10690	16120	100	730	905	681	99	108	51	92	82	0	592	779	642	37	43	40	88	82	0	1.137	1.086	1.104	1.156	1.845	1.053	0.915	80	497	1186	1548	0.185	631	555	806	742	0
2	1	12	"iYBR291C"	"iYBR291C"	6680	16320	110	661	613	269	95	105	75	92	83	0	1221	982	617	38	56	243	73	68	0	0.478	0.549	0.544	0.669	2.228	0.488	0.859	80	559	1749	1462	-1.064	566	1183	518	944	0
2	2	12	"iYBR294W"	"iYBR294W"	6860	16330	120	743	708	321	95	99	32	98	97	0	2398	2225	1360	38	51	237	92	83	0	0.275	0.280	0.284	0.320	1.964	0.233	0.771	120	573	3008	2800	-1.865	648	2360	613	2187	0
2	3	12	"iYBR297W"	"iYBR297W"	7060	16320	110	776	877	429	100	103	32	100	100	0	1078	1061	584	39	41	24	100	96	0	0.651	0.760	0.746	0.837	1.929	0.736	0.858	80	540	1715	1799	-0.620	676	1039	777	1022	0
2	4	12	"iYCL061C"	"iYCL061C"	7270	16330	120	597	827	716	102	106	45	87	84	0	1484	2239	2162	39	41	23	94	94	0	0.343	0.330	0.312	0.365	2.376	0.296	0.814	120	587	1940	2925	-1.546	495	1445	725	2200	0
2	5	12	"iYCL055W-0"	"iYCL055W-0"	7450	16320	110	370	411	199	105	116	94	87	67	0	902	992	599	41	47	37	100	100	0	0.308	0.322	0.326	0.324	1.816	0.304	0.836	80	546	1126	1257	-1.700	265	861	306	951	0
2	6	12	"iYCL051W"	"iYCL051W"	7670	16320	110	4387	4309	1771	101	106	38	100	100	0	2297	2275	1028	40	43	26	100	100	0	1.899	1.883	1.889	1.952	1.294	1.857	0.932	80	583	6543	6443	0.925	4286	2257	4208	2235	0
2	7	12	"iYCL029C"	"iYCL029C"	7870	16320	110	787	881	492	99	106	44	100	100	0	2086	1975	1019	39	43	44	100	98	0	0.336	0.404	0.390	0.431	1.711	0.394	0.832	80	546	2735	2718	-1.573	688	2047	782	1936	0
2	8	12	"iYCL025C"	"iYCL025C"	8060	16310	110	399	411	115	97	100	30	100	100	0	1764	1598	594	37	39	19	100	100	0	0.175	0.201	0.198	0.211	1.639	0.181	0.811	80	533	2029	1875	-2.516	302	1727	314	1561	0
2	9	12	"iYCRCdelta6-0"	"iYCRCdelta6-0"	8260	16310	110	847	894	421	98	103	33	100	100	0	1149	1153	688	39	40	21	98	96	0	0.675	0.715	0.694	0.803	1.774	0.653	0.885	80	578	1859	1910	-0.568	749	1110	796	1114	0
2	10	12	"iYDL043C"	"iYDL043C"	8470	16320	110	390	400	163	101	104	32	97	92	0	1002	916	477	39	40	21	98	97	0	0.300	0.341	0.318	0.354	2.183	0.300	0.728	80	594	1252	1176	-1.736	289	963	299	877	0
2	11	12	"iYDL037C-0"	"iYDL037C-0"	8670	16320	100	765	812	371	99	103	33	100	100	0	940	943	502	37	39	18	100	98	0	0.738	0.787	0.780	0.853	1.693	0.758	0.872	80	512	1569	1619	-0.439	666	903	713	906	0
2	12	12	"iYDL032W"	"iYDL032W"	8870	16320	110	286	305	152	96	102	34	93	90	0	831	848	519	39	40	20	100	93	0	0.240	0.258	0.229	0.304	2.419	0.194	0.368	80	567	982	1018	-2.060	190	792	209	809	0
2	13	12	"iYDL014W"	"iYDL014W"	9070	16320	100	801	782	342	99	105	42	100	97	0	1554	1561	928	38	41	23	98	97	0	0.463	0.448	0.480	0.516	1.925	0.403	0.881	80	482	2218	2206	-1.111	702	1516	683	1523	0
2	14	12	"iYDL008W"	"iYDL008W"	9240	16320	110	435	465	314	101	105	40	96	96	0	596	578	336	39	41	22	96	90	0	0.600	0.675	0.627	0.755	2.160	0.672	0.474	80	576	891	903	-0.738	334	557	364	539	0
2	15	12	"iYDLWtau1"	"iYDLWtau1"	9470	16320	100	581	533	227	100	105	41	97	92	0	697	698	399	39	40	20	100	97	0	0.731	0.657	0.638	0.703	1.847	0.599	0.839	80	509	1139	1092	-0.452	481	658	433	659	0
2	16	12	"iYDR008C"	"iYDR008C"	9650	16320	110	1251	1296	572	98	106	54	100	100	0	1509	1582	896	38	41	26	100	100	0	0.784	0.776	0.739	0.841	1.588	0.699	0.871	80	538	2624	2742	-0.351	1153	1471	1198	1544	0
2	17	12	"iYDR013W"	"iYDR013W"	9850	16320	100	462	471	238	99	107	53	92	80	0	335	377	253	38	41	23	91	86	0	1.222	1.097	1.151	1.236	2.372	1.047	0.787	80	507	660	711	0.290	363	297	372	339	0
2	18	12	"iYDR016C"	"iYDR016C"	10050	16320	110	2553	2542	1275	103	110	64	100	100	0	1157	1238	831	39	43	44	96	93	0	2.191	2.034	2.026	2.544	1.983	1.888	0.908	80	563	3568	3638	1.132	2450	1118	2439	1199	0
2	19	12	"iYDR032C-0"	"iYDR032C-0"	10260	16330	110	420	470	193	100	104	32	100	100	0	1422	1492	819	38	40	21	100	100	0	0.231	0.254	0.251	0.278	1.847	0.222	0.790	80	576	1704	1824	-2.113	320	1384	370	1454	0
2	20	12	"iYDR034C"	"iYDR034C"	10460	16320	110	1762	1612	688	100	106	59	100	100	0	3169	2899	1610	39	41	27	100	100	0	0.531	0.529	0.507	0.584	1.599	0.474	0.890	80	579	4792	4372	-0.913	1662	3130	1512	2860	0
2	21	12	"iYDR034C-A"	"iYDR034C-A"	10660	16330	100	2477	2349	1068	100	107	58	100	100	0	3375	3172	1828	37	40	23	100	100	0	0.712	0.717	0.724	0.869	1.695	0.648	0.921	80	519	5715	5384	-0.490	2377	3338	2249	3135	0
2	1	13	"iYDR335W"	"iYDR335W"	6670	16520	90	580	573	254	94	98	31	98	96	0	938	1006	624	36	39	21	100	98	0	0.539	0.494	0.476	0.569	2.101	0.406	0.720	52	379	1388	1449	-0.892	486	902	479	970	0
2	2	13	"iYDR339C"	"iYDR339C"	6850	16530	150	106	127	130	95	99	32	28	10	0	43	55	74	37	48	202	1	1	0	1.833	1.778	1.176	1.161	4.237	0.045	0.017	156	794	17	50	0.874	11	6	32	18	-50
2	3	13	"iYDR342C-1"	"iYDR342C-1"	7060	16540	100	548	526	173	94	98	32	98	95	0	3980	3196	1491	39	42	27	100	100	0	0.115	0.137	0.133	0.153	1.900	0.120	0.754	80	510	4395	3589	-3.118	454	3941	432	3157	0
2	4	13	"iYDR354W"	"iYDR354W"	7270	16520	110	294	292	123	97	100	35	86	80	0	1044	889	573	38	41	30	96	92	0	0.196	0.229	0.246	0.266	2.179	0.199	0.718	80	568	1203	1046	-2.352	197	1006	195	851	0
2	5	13	"iYDR360W"	"iYDR360W"	7480	16520	110	227	286	246	102	111	87	65	31	0	1073	1080	772	40	47	42	91	88	0	0.121	0.177	0.108	0.189	4.316	0.112	0.111	80	586	1158	1224	-3.047	125	1033	184	1040	0
2	6	13	"itK(CUU)D1"	"itK(CUU)D1"	7680	16520	90	1080	979	523	102	114	88	90	84	0	1679	1539	1064	43	56	115	82	76	0	0.598	0.586	0.580	0.738	2.355	0.531	0.832	52	406	2614	2373	-0.742	978	1636	877	1496	0
2	7	13	"iYDR379W"	"iYDR379W"	7870	16530	120	1340	1329	509	101	103	31	100	100	0	3112	2902	1348	40	48	76	99	96	0	0.403	0.429	0.415	0.485	1.994	0.395	0.869	120	647	4311	4090	-1.310	1239	3072	1228	2862	0
2	8	13	"iYDR383C"	"iYDR383C"	8080	16520	100	799	807	474	99	107	40	95	92	0	1211	1522	1148	41	51	73	96	92	0	0.598	0.478	0.501	0.541	1.862	0.430	0.861	80	517	1870	2189	-0.741	700	1170	708	1481	0
2	9	13	"iYDR387C"	"iYDR387C"	8280	16540	110	866	858	540	98	110	69	91	82	0	1249	1278	996	40	51	90	87	78	0	0.635	0.614	0.605	0.757	2.492	0.558	0.825	80	566	1977	1998	-0.655	768	1209	760	1238	0
2	10	13	"iYDR404C"	"iYDR404C"	8490	16530	90	391	409	189	101	106	32	94	90	0	1163	1242	858	39	43	26	94	90	0	0.258	0.256	0.260	0.335	2.575	0.207	0.712	52	415	1414	1511	-1.955	290	1124	308	1203	0
2	11	13	"iYDR408C"	"iYDR408C"	8680	16520	90	393	374	149	96	103	37	94	92	0	1746	1847	1102	39	51	135	94	92	0	0.174	0.154	0.153	0.177	2.288	0.131	0.487	52	414	2004	2086	-2.523	297	1707	278	1808	0
2	12	13	"iYDR413C"	"iYDR413C"	8880	16530	100	284	288	172	98	102	31	85	76	0	632	744	531	39	40	19	96	96	0	0.314	0.270	0.232	0.263	2.226	0.252	0.708	80	492	779	895	-1.673	186	593	190	705	0
2	13	13	"itS(UGA)E-0"	"itS(UGA)E-0"	9060	16530	110	777	986	647	99	104	39	97	96	0	1873	2690	2088	38	41	24	97	96	0	0.369	0.334	0.359	0.393	1.815	0.308	0.877	80	555	2513	3539	-1.436	678	1835	887	2652	0
2	14	13	"iYER068W"	"iYER068W"	9260	16530	110	493	538	269	100	102	30	97	93	0	1878	1882	1266	38	39	20	100	98	0	0.214	0.238	0.255	0.273	1.984	0.216	0.621	80	587	2233	2282	-2.227	393	1840	438	1844	0
2	15	13	"iYER072W"	"iYER072W"	9460	16530	100	380	415	255	98	102	34	91	85	0	1289	1308	989	39	40	31	98	96	0	0.226	0.250	0.250	0.299	2.298	0.229	0.786	80	510	1532	1586	-2.148	282	1250	317	1269	0
2	16	13	"iYER087W"	"iYER087W"	9680	16530	120	1329	1310	757	98	103	34	99	95	0	1475	1586	1130	39	41	30	96	95	0	0.857	0.783	0.786	0.912	2.050	0.728	0.895	120	658	2667	2759	-0.222	1231	1436	1212	1547	0
2	17	13	"iYER090W"	"iYER090W"	9860	16520	110	2438	2150	877	99	103	33	100	100	0	2471	2120	1007	38	40	21	100	100	0	0.961	0.985	0.932	1.020	1.631	0.975	0.909	80	513	4772	4133	-0.057	2339	2433	2051	2082	0
2	18	13	"iYER093C"	"iYER093C"	10060	16520	120	315	314	157	100	109	72	77	67	0	1215	1302	915	39	44	49	93	88	0	0.183	0.169	0.163	0.176	2.252	0.153	0.726	120	670	1391	1477	-2.451	215	1176	214	1263	0
2	19	13	"iYER106W"	"iYER106W"	10280	16520	110	1215	1152	663	99	108	61	97	90	0	1930	1940	1329	38	43	37	96	95	0	0.590	0.554	0.547	0.638	1.910	0.503	0.895	80	574	3008	2955	-0.762	1116	1892	1053	1902	0
2	20	13	"iYER110C"	"iYER110C"	10480	16530	100	672	708	411	99	104	36	97	93	0	1464	1475	963	36	39	25	95	95	0	0.401	0.423	0.407	0.479	2.254	0.407	0.867	80	493	2001	2048	-1.317	573	1428	609	1439	0
2	21	13	"iYER114C"	"iYER114C"	10670	16530	120	382	446	291	100	107	62	78	71	0	1310	1623	1405	38	43	41	88	85	0	0.222	0.218	0.222	0.268	2.385	0.199	0.871	120	624	1554	1931	-2.173	282	1272	346	1585	0
2	1	14	"iYER131W"	"iYER131W"	6660	16720	120	1000	896	392	96	104	93	94	88	0	2104	1935	1137	37	44	68	95	93	0	0.437	0.421	0.395	0.478	2.059	0.373	0.847	120	706	2971	2698	-1.193	904	2067	800	1898	0
2	2	14	"iYERCdelta14"	"iYERCdelta14"	6860	16720	110	604	599	271	95	98	33	97	96	0	1817	1838	1128	37	38	21	100	100	0	0.286	0.280	0.276	0.320	2.240	0.247	0.817	80	514	2289	2305	-1.806	509	1780	504	1801	0
2	3	14	"itK(CUU)E2"	"itK(CUU)E2"	7080	16730	100	1225	1276	722	95	103	49	96	93	0	2229	1994	1210	39	68	178	91	83	0	0.516	0.604	0.592	0.676	1.865	0.584	0.889	80	511	3320	3136	-0.955	1130	2190	1181	1955	0
2	4	14	"iYGL186C"	"iYGL186C"	7290	16730	100	342	377	215	99	109	53	83	66	0	1078	1386	1099	40	84	207	78	70	0	0.234	0.207	0.199	0.247	2.308	0.186	0.843	80	496	1281	1624	-2.095	243	1038	278	1346	0
2	5	14	"iYGL182C"	"iYGL182C"	7470	16720	100	605	566	316	96	103	39	93	83	0	2947	2790	2022	38	54	107	88	83	0	0.175	0.171	0.184	0.226	2.353	0.159	0.864	80	504	3418	3222	-2.515	509	2909	470	2752	0
2	6	14	"iYGL179C-1"	"iYGL179C-1"	7700	16720	90	204	220	84	97	105	45	88	63	0	685	791	527	42	60	146	86	75	0	0.166	0.164	0.172	0.192	2.299	0.145	0.505	52	406	750	872	-2.587	107	643	123	749	0
2	7	14	"iYGL163C-1"	"iYGL163C-1"	7880	16720	100	328	422	267	99	107	45	88	73	0	1484	2153	1876	41	67	170	83	78	0	0.159	0.153	0.153	0.204	2.593	0.135	0.866	80	425	1672	2435	-2.656	229	1443	323	2112	0
2	8	14	"iYGL159W"	"iYGL159W"	8050	16730	120	452	611	549	104	111	41	94	89	0	758	1009	972	43	51	64	93	87	0	0.487	0.525	0.487	0.576	2.099	0.512	0.776	120	608	1063	1473	-1.039	348	715	507	966	0
2	9	14	"iYGL157W"	"iYGL157W"	8270	16720	130	446	552	329	116	142	125	84	61	0	1568	1621	1149	48	72	95	92	87	0	0.217	0.277	0.270	0.300	1.999	0.271	0.814	120	659	1850	2009	-2.204	330	1520	436	1573	0
2	10	14	"iYGL139W"	"iYGL139W"	8470	16730	120	849	955	875	108	133	119	92	83	0	1626	1834	1240	44	60	56	97	95	0	0.468	0.473	0.434	0.462	1.815	0.506	0.631	120	597	2323	2637	-1.094	741	1582	847	1790	0
2	11	14	"iYGL135W"	"iYGL135W"	8670	16720	120	765	868	463	98	104	41	99	99	0	2131	2281	1341	39	49	111	97	96	0	0.319	0.343	0.334	0.358	1.650	0.324	0.871	120	624	2759	3012	-1.649	667	2092	770	2242	0
2	12	14	"iYGL130W"	"iYGL130W"	8880	16730	120	946	1033	588	98	102	30	100	98	0	2066	2149	1418	40	41	21	98	97	0	0.419	0.443	0.462	0.500	1.724	0.420	0.930	120	603	2874	3044	-1.256	848	2026	935	2109	0
2	13	14	"iYGL114W"	"iYGL114W"	9070	16730	110	404	399	153	101	108	52	92	88	0	702	767	463	40	41	22	98	98	0	0.458	0.410	0.387	0.468	2.012	0.329	0.737	80	538	965	1025	-1.128	303	662	298	727	0
2	14	14	"iYGL110C"	"iYGL110C"	9270	16730	90	138	153	71	98	101	32	57	40	0	152	152	80	39	40	27	82	76	0	0.354	0.487	0.605	0.569	4.287	0.536	0.166	52	408	153	168	-1.498	40	113	55	113	0
2	15	14	"iYGL105W"	"iYGL105W"	9470	16730	120	353	392	203	98	107	70	90	75	0	811	788	546	38	45	73	92	82	0	0.330	0.392	0.410	0.435	2.119	0.354	0.735	120	626	1028	1044	-1.600	255	773	294	750	0
2	16	14	"iYGR177C"	"iYGR177C"	9680	16740	110	246	257	93	99	109	75	81	45	0	772	788	526	38	45	75	90	81	0	0.200	0.211	0.194	0.265	2.436	0.187	0.485	80	514	881	908	-2.320	147	734	158	750	0
2	17	14	"itL(CAA)G3"	"itL(CAA)G3"	9870	16720	110	846	927	370	96	99	30	100	100	0	3101	2687	1505	38	38	19	100	100	0	0.245	0.314	0.302	0.350	1.532	0.286	0.903	80	548	3813	3480	-2.030	750	3063	831	2649	0
2	18	14	"iYGR185C"	"iYGR185C"	10070	16730	110	395	432	207	98	104	51	93	88	0	1406	1331	880	38	40	36	98	93	0	0.217	0.258	0.259	0.316	2.268	0.233	0.848	80	566	1665	1627	-2.204	297	1368	334	1293	0
2	19	14	"iYGR199W"	"iYGR199W"	10280	16730	110	749	707	316	96	102	43	100	97	0	585	563	324	37	39	23	96	96	0	1.192	1.162	1.187	1.391	2.057	1.084	0.867	80	547	1201	1137	0.253	653	548	611	526	0
2	20	14	"iYGR203W"	"iYGR203W"	10470	16730	100	286	305	122	96	102	43	96	88	0	858	810	470	35	38	20	98	98	0	0.231	0.270	0.252	0.302	2.123	0.228	0.692	80	481	1013	984	-2.115	190	823	209	775	0
2	21	14	"iYGR207C"	"iYGR207C"	10680	16720	120	422	437	206	101	113	113	82	66	0	622	720	483	38	47	79	90	81	0	0.550	0.493	0.505	0.549	1.864	0.501	0.726	120	624	905	1018	-0.863	321	584	336	682	0
2	1	15	"iYGR221C"	"iYGR221C"	6650	16930	100	333	339	141	96	107	64	91	76	0	817	782	461	38	61	126	86	81	0	0.304	0.327	0.315	0.369	2.267	0.285	0.701	80	504	1016	987	-1.717	237	779	243	744	0
2	2	15	"iYGR224W"	"iYGR224W"	6860	16920	120	353	373	185	94	104	56	89	79	0	1163	1391	1026	38	56	111	95	85	0	0.230	0.206	0.213	0.240	2.011	0.173	0.778	120	661	1384	1632	-2.119	259	1125	279	1353	0
2	3	15	"iYGR230W"	"iYGR230W"	7070	16920	110	559	561	237	91	97	34	98	96	0	1605	1599	1016	38	40	20	100	100	0	0.299	0.301	0.290	0.359	2.035	0.250	0.790	80	557	2035	2031	-1.743	468	1567	470	1561	0
2	4	15	"iYGR247W"	"iYGR247W"	7270	16920	110	380	386	147	95	102	50	95	91	0	837	942	578	38	41	27	100	98	0	0.357	0.322	0.324	0.371	2.123	0.248	0.638	80	580	1084	1195	-1.487	285	799	291	904	0
2	5	15	"iYGR250C-0"	"iYGR250C-0"	7500	16920	100	266	342	212	96	102	53	75	62	0	1066	1260	1053	36	43	61	86	81	0	0.165	0.201	0.214	0.247	2.259	0.183	0.788	80	505	1200	1470	-2.599	170	1030	246	1224	0
2	6	15	"iYGR253C-0"	"iYGR253C-0"	7680	16920	100	332	349	155	94	102	61	87	76	0	913	930	640	39	40	23	96	92	0	0.272	0.286	0.324	0.357	2.455	0.233	0.753	80	486	1112	1146	-1.877	238	874	255	891	0
2	7	15	"iYHR186C"	"iYHR186C"	7880	16930	120	3856	4675	3741	95	103	56	99	98	0	2241	2741	2305	40	45	75	90	88	0	1.709	1.696	1.752	2.113	2.697	1.709	0.885	120	635	5962	7281	0.773	3761	2201	4580	2701	0
2	8	15	"iYHR191C"	"iYHR191C"	8080	16920	110	307	327	139	110	122	80	82	62	0	876	877	544	48	69	222	83	68	0	0.238	0.262	0.252	0.280	2.151	0.231	0.675	80	537	1025	1046	-2.071	197	828	217	829	0
2	9	15	"iYHR196W"	"iYHR196W"	8280	16920	100	323	332	154	134	159	129	63	30	0	534	593	362	69	88	80	88	78	0	0.406	0.378	0.337	0.384	2.883	0.347	0.333	80	486	654	722	-1.299	189	465	198	524	0
2	10	15	"iYHRCdelta16-0"	"iYHRCdelta16-0"	8470	16920	110	1928	2408	1628	122	149	127	100	97	0	5396	6287	4523	55	76	66	100	100	0	0.338	0.367	0.377	0.399	1.614	0.347	0.901	80	504	7147	8518	-1.564	1806	5341	2286	6232	0
2	11	15	"iYIL174W-1"	"iYIL174W-1"	8670	16920	100	364	457	279	101	108	44	93	87	0	938	1454	1247	40	45	33	96	90	0	0.293	0.252	0.270	0.309	2.304	0.223	0.847	80	466	1161	1770	-1.772	263	898	356	1414	0
2	12	15	"iYIL170W-1"	"iYIL170W-1"	8880	16920	100	360	455	299	98	105	52	93	85	0	1143	1782	1560	38	40	21	100	97	0	0.237	0.205	0.217	0.238	2.026	0.180	0.798	80	448	1367	2101	-2.076	262	1105	357	1744	0
2	13	15	"iYIL153W"	"iYIL153W"	9070	16920	110	671	692	393	98	106	63	93	85	0	973	914	640	38	43	42	87	82	0	0.613	0.678	0.711	0.821	1.874	0.632	0.846	80	528	1508	1470	-0.706	573	935	594	876	0
2	14	15	"iYIL149C"	"iYIL149C"	9260	16920	110	669	673	431	98	103	56	98	86	0	2425	2376	1835	38	52	115	93	87	0	0.239	0.246	0.254	0.299	2.144	0.231	0.877	80	530	2958	2913	-2.064	571	2387	575	2338	0
2	15	15	"iYIL145C"	"iYIL145C"	9480	16920	120	554	599	344	99	108	71	94	85	0	2762	2934	2075	39	50	87	98	95	0	0.167	0.173	0.176	0.187	1.822	0.157	0.837	120	605	3178	3395	-2.581	455	2723	500	2895	0
2	16	15	"iYIL129C"	"iYIL129C"	9700	16920	120	307	319	162	98	106	64	83	60	0	1035	1293	1075	38	43	71	87	81	0	0.210	0.176	0.188	0.261	3.601	0.138	0.696	120	565	1206	1476	-2.254	209	997	221	1255	0
2	17	15	"iYIL125W"	"iYIL125W"	9890	16910	100	612	561	292	98	105	56	93	85	0	907	864	579	38	41	41	97	91	0	0.591	0.561	0.564	0.611	1.909	0.508	0.778	80	485	1383	1289	-0.758	514	869	463	826	0
2	18	15	"iYIL121W"	"iYIL121W"	10100	16920	110	889	969	579	98	104	52	100	97	0	1147	1337	996	37	40	38	98	96	0	0.713	0.670	0.671	0.779	2.009	0.620	0.890	80	515	1901	2171	-0.489	791	1110	871	1300	0
2	19	15	"itR(ACG)J"	"itR(ACG)J"	10290	16920	120	887	832	448	98	102	41	98	96	0	1084	1149	781	36	39	22	97	96	0	0.753	0.659	0.682	0.741	1.904	0.614	0.862	120	567	1837	1847	-0.410	789	1048	734	1113	0
2	20	15	"iYJL098W"	"iYJL098W"	10500	16910	110	323	381	327	100	106	47	92	82	0	608	713	512	38	41	39	92	85	0	0.391	0.416	0.399	0.484	2.468	0.399	0.449	80	524	793	956	-1.354	223	570	281	675	0
2	21	15	"iYJL093C"	"iYJL093C"	10700	16910	100	384	480	289	102	105	32	95	88	0	886	1521	1406	37	38	19	96	96	0	0.332	0.255	0.272	0.341	2.396	0.213	0.838	80	433	1131	1862	-1.590	282	849	378	1484	0
2	1	16	"iYJL074C"	"iYJL074C"	6680	17120	100	330	327	121	96	100	35	96	90	0	1370	1428	873	37	41	44	98	96	0	0.176	0.166	0.152	0.195	2.641	0.126	0.603	80	502	1567	1622	-2.510	234	1333	231	1391	0
2	2	16	"iYJL070C"	"iYJL070C"	6880	17120	110	277	288	104	98	105	66	87	70	0	707	770	468	36	45	109	95	81	0	0.267	0.259	0.268	0.283	2.132	0.219	0.675	80	541	850	924	-1.906	179	671	190	734	0
2	3	16	"iYJL064W"	"iYJL064W"	7090	17120	110	213	230	102	94	102	62	75	47	0	751	960	702	37	46	107	90	81	0	0.167	0.147	0.163	0.159	2.337	0.128	0.557	80	559	833	1059	-2.585	119	714	136	923	0
2	4	16	"iSNR60"	"iSNR60"	7280	17120	100	292	301	137	93	98	31	96	90	0	615	609	322	38	39	21	98	97	0	0.345	0.364	0.339	0.395	2.361	0.317	0.513	80	490	776	779	-1.536	199	577	208	571	0
2	5	16	"iYJLCdelta5"	"iYJLCdelta5"	7480	17120	110	595	675	393	92	96	30	100	96	0	865	1062	772	38	39	18	97	96	0	0.608	0.569	0.600	0.681	2.025	0.523	0.869	80	534	1330	1607	-0.717	503	827	583	1024	0
2	6	16	"iYJL043W"	"iYJL043W"	7670	17120	110	430	469	247	94	100	48	97	92	0	855	954	626	37	39	22	100	98	0	0.411	0.409	0.415	0.439	1.716	0.364	0.758	80	532	1154	1292	-1.284	336	818	375	917	0
2	7	16	"iYJL029C"	"iYJL029C"	7870	17120	110	285	305	140	97	103	48	92	76	0	306	331	225	39	41	23	92	85	0	0.704	0.712	0.717	0.813	2.113	0.639	0.764	80	524	455	500	-0.506	188	267	208	292	0
2	8	16	"iYJL026W"	"iYJL026W"	8080	17130	110	288	319	152	104	124	103	70	45	0	534	597	390	42	67	225	75	53	0	0.374	0.387	0.372	0.393	1.977	0.315	0.522	80	546	676	770	-1.419	184	492	215	555	0
2	9	16	"iYJL022W"	"iYJL022W"	8280	17130	130	1151	1220	575	108	129	85	100	95	0	1403	1653	1063	44	61	70	97	95	0	0.767	0.691	0.666	0.805	1.754	0.623	0.887	120	669	2402	2721	-0.382	1043	1359	1112	1609	0
2	10	16	"iYKL121W"	"iYKL121W"	8490	17110	120	543	542	273	104	117	64	90	85	0	1380	1375	832	44	56	58	96	94	0	0.329	0.329	0.325	0.352	1.886	0.305	0.775	120	568	1775	1769	-1.606	439	1336	438	1331	0
2	11	16	"iYKL117W"	"iYKL117W"	8670	17100	120	3158	2908	1425	103	111	58	97	95	0	1595	1528	838	41	50	56	99	93	0	1.966	1.886	1.822	1.923	1.721	1.874	0.909	120	544	4609	4292	0.975	3055	1554	2805	1487	0
2	12	16	"iYKL111C"	"iYKL111C"	8860	17100	120	609	677	311	101	107	50	99	98	0	809	931	576	36	41	27	100	98	0	0.657	0.644	0.682	0.733	1.727	0.586	0.843	120	616	1281	1471	-0.606	508	773	576	895	0
2	13	16	"iYKL097W-A-0"	"iYKL097W-A-0"	9080	17100	90	488	683	723	100	105	41	98	94	0	1098	1153	728	37	42	37	100	98	0	0.366	0.522	0.368	0.442	1.923	0.617	0.646	52	394	1449	1699	-1.451	388	1061	583	1116	0
2	14	16	"iYKL094W"	"iYKL094W"	9260	17090	110	2013	1925	732	99	104	41	100	100	0	3504	3039	1486	39	50	106	100	100	0	0.552	0.609	0.618	0.658	1.487	0.572	0.922	80	553	5379	4826	-0.856	1914	3465	1826	3000	0
2	15	16	"iYKL090W"	"iYKL090W"	9470	17100	110	407	396	138	99	102	33	98	95	0	1659	1558	889	39	42	30	100	100	0	0.190	0.196	0.199	0.219	1.795	0.168	0.793	80	563	1928	1816	-2.395	308	1620	297	1519	0
2	16	16	"iYKL072W"	"iYKL072W"	9680	17090	100	247	259	98	98	102	33	93	81	0	284	321	192	37	39	21	96	93	0	0.603	0.567	0.598	0.582	1.894	0.508	0.657	80	472	396	445	-0.729	149	247	161	284	0
2	17	16	"iYKL071W"	"iYKL071W"	9870	17110	110	955	928	344	97	102	36	100	100	0	2251	1987	897	36	39	23	100	98	0	0.387	0.426	0.403	0.466	1.695	0.398	0.877	80	566	3073	2782	-1.368	858	2215	831	1951	0
2	18	16	"itV(AAC)K1-1"	"itV(AAC)K1-1"	10080	17110	120	449	436	196	97	100	29	96	91	0	1491	1580	967	37	39	21	97	96	0	0.242	0.220	0.205	0.240	2.032	0.197	0.835	120	597	1806	1882	-2.046	352	1454	339	1543	0
2	19	16	"iYKL056C"	"iYKL056C"	10260	17100	120	228	228	93	97	101	29	90	74	0	448	446	235	37	38	17	96	95	0	0.319	0.320	0.284	0.313	2.343	0.249	0.457	120	539	542	540	-1.650	131	411	131	409	0
2	20	16	"iYKL052C"	"iYKL052C"	10460	17100	120	450	440	154	98	103	37	98	97	0	1692	1641	832	37	41	38	100	100	0	0.213	0.213	0.213	0.225	1.695	0.189	0.809	120	602	2007	1946	-2.233	352	1655	342	1604	0
2	21	16	"iYKL048C"	"iYKL048C"	10660	17110	120	486	496	194	99	104	31	100	95	0	1516	1447	761	36	38	20	100	100	0	0.261	0.281	0.283	0.318	1.816	0.248	0.816	120	688	1867	1808	-1.935	387	1480	397	1411	0
2	1	17	"iYLR069C"	"iYLR069C"	6670	17320	120	517	573	320	92	98	39	96	94	0	973	944	483	36	39	19	99	98	0	0.454	0.530	0.504	0.509	1.681	0.554	0.692	120	624	1362	1389	-1.141	425	937	481	908	0
2	2	17	"iYLR073C"	"iYLR073C"	6840	17310	120	262	286	140	95	102	60	85	68	0	979	956	520	36	40	35	100	96	0	0.177	0.208	0.191	0.200	2.050	0.185	0.606	120	605	1110	1111	-2.497	167	943	191	920	0
2	3	17	"iYLR078C"	"iYLR078C"	7060	17310	100	382	402	162	97	104	64	96	82	0	731	794	472	37	40	37	98	97	0	0.411	0.403	0.403	0.445	1.890	0.362	0.786	80	520	979	1062	-1.284	285	694	305	757	0
2	4	17	"iYLR094C"	"iYLR094C"	7260	17310	100	602	645	298	95	99	35	100	96	0	2156	2260	1255	38	40	23	100	100	0	0.239	0.248	0.240	0.257	1.643	0.228	0.854	80	484	2625	2772	-2.063	507	2118	550	2222	0
2	5	17	"iYLR098C"	"iYLR098C"	7450	17310	130	650	614	237	95	101	33	99	96	0	2311	1976	992	38	45	101	100	94	0	0.244	0.268	0.266	0.289	1.590	0.244	0.868	120	657	2828	2457	-2.034	555	2273	519	1938	0
2	6	17	"iYLR104W"	"iYLR104W"	7650	17320	140	368	370	141	97	103	46	95	89	0	780	688	346	38	46	99	91	82	0	0.365	0.420	0.404	0.456	2.050	0.386	0.776	156	709	1013	923	-1.453	271	742	273	650	0
2	7	17	"iYLR117C"	"iYLR117C"	7850	17320	140	1389	1334	616	97	104	54	99	98	0	3459	3121	1608	38	40	22	100	99	0	0.378	0.401	0.386	0.433	1.748	0.380	0.893	156	694	4713	4320	-1.405	1292	3421	1237	3083	0
2	8	17	"iYLR121C"	"iYLR121C"	8050	17320	130	310	296	89	97	101	45	95	87	0	1267	1159	520	39	42	24	99	99	0	0.173	0.178	0.174	0.189	2.150	0.150	0.695	120	602	1441	1319	-2.527	213	1228	199	1120	0
2	9	17	"iYLR125W"	"iYLR125W"	8250	17330	140	2072	1865	735	96	99	30	100	98	0	3264	2728	1414	38	41	24	98	98	0	0.613	0.658	0.620	0.779	2.013	0.608	0.907	156	726	5202	4459	-0.707	1976	3226	1769	2690	0
2	10	17	"itD(GUC)L1"	"itD(GUC)L1"	8460	17320	130	297	309	102	94	98	31	99	97	0	588	552	228	40	42	23	100	97	0	0.370	0.420	0.394	0.444	2.012	0.375	0.656	120	640	751	727	-1.433	203	548	215	512	0
2	11	17	"iYLR147C"	"iYLR147C"	8660	17340	140	521	527	191	97	99	29	99	98	0	1287	1204	540	40	42	22	99	98	0	0.340	0.369	0.354	0.399	1.892	0.344	0.830	156	715	1671	1594	-1.556	424	1247	430	1164	0
2	12	17	"iYLR151C"	"iYLR151C"	8870	17330	140	877	823	277	97	100	29	98	98	0	1152	1020	416	37	39	18	99	98	0	0.700	0.739	0.714	0.768	1.676	0.712	0.880	156	668	1895	1709	-0.515	780	1115	726	983	0
2	13	17	"iYLR459W"	"iYLR459W"	9050	17330	140	968	937	355	98	104	39	98	98	0	2430	2214	1065	38	40	23	100	99	0	0.364	0.386	0.379	0.437	1.886	0.355	0.891	156	726	3262	3015	-1.459	870	2392	839	2176	0
2	14	17	"iYLR461W-1"	"iYLR461W-1"	9250	17330	130	11153	10168	4071	99	107	44	100	100	0	14192	12658	5561	39	43	33	100	100	0	0.781	0.798	0.790	0.841	1.411	0.749	0.923	120	676	25207	22688	-0.357	11054	14153	10069	12619	0
2	15	17	"iYML132W-0"	"iYML132W-0"	9440	17330	130	2496	2373	925	101	109	58	100	100	0	4900	4411	1884	40	53	120	99	97	0	0.493	0.520	0.502	0.551	1.505	0.483	0.891	120	670	7255	6643	-1.021	2395	4860	2272	4371	0
2	16	17	"iYML117W-A"	"iYML117W-A"	9660	17330	140	958	895	323	99	105	53	98	96	0	1821	1640	771	38	49	110	94	91	0	0.482	0.497	0.480	0.567	1.845	0.466	0.900	156	762	2642	2398	-1.054	859	1783	796	1602	0
2	17	17	"iYML113W"	"iYML113W"	9850	17340	140	1144	1150	510	99	100	29	100	100	0	2250	2085	955	37	38	18	100	100	0	0.472	0.513	0.508	0.544	1.511	0.497	0.897	156	701	3258	3099	-1.083	1045	2213	1051	2048	0
2	18	17	"iYML109W"	"iYML109W"	10050	17330	130	636	631	242	99	102	34	99	98	0	1281	1172	399	35	38	21	100	100	0	0.431	0.468	0.438	0.475	1.610	0.442	0.772	120	609	1783	1669	-1.214	537	1246	532	1137	0
2	19	17	"iYML089C"	"iYML089C"	10230	17330	130	260	274	103	99	102	34	98	91	0	1032	961	380	37	39	20	99	98	0	0.162	0.189	0.176	0.194	2.135	0.165	0.584	120	655	1156	1099	-2.628	161	995	175	924	0
2	20	17	"iYML085C"	"iYML085C"	10450	17340	140	297	292	95	99	102	37	98	89	0	1082	947	408	37	39	28	98	96	0	0.189	0.212	0.201	0.219	2.074	0.189	0.678	156	767	1243	1103	-2.400	198	1045	193	910	0
2	21	17	"iYML081W"	"iYML081W"	10650	17340	130	820	766	262	97	101	36	98	98	0	2850	2349	1047	36	38	27	100	99	0	0.257	0.289	0.282	0.312	1.531	0.269	0.887	120	718	3537	2982	-1.961	723	2814	669	2313	0
2	1	18	"iYML068W"	"iYML068W"	6660	17540	130	280	295	141	92	97	42	91	84	0	812	700	357	39	43	28	97	95	0	0.243	0.307	0.283	0.318	2.343	0.255	0.534	120	681	961	864	-2.040	188	773	203	661	0
2	2	18	"iYML064C"	"iYML064C"	6840	17540	130	737	703	218	93	100	52	99	97	0	3021	2624	1047	41	46	25	100	100	0	0.216	0.236	0.222	0.252	1.688	0.214	0.851	120	569	3624	3193	-2.210	644	2980	610	2583	0
2	3	18	"iYML060W"	"iYML060W"	7020	17550	140	1315	1212	457	96	104	56	99	98	0	2128	1868	909	38	41	23	100	100	0	0.583	0.610	0.589	0.664	1.537	0.569	0.883	156	705	3309	2946	-0.778	1219	2090	1116	1830	0
2	4	18	"iYMR222C"	"iYMR222C"	7240	17540	140	583	563	212	95	101	40	97	92	0	1845	1584	756	38	40	23	98	97	0	0.270	0.303	0.293	0.334	1.939	0.276	0.833	156	745	2295	2014	-1.889	488	1807	468	1546	0
2	5	18	"iYMR226C"	"iYMR226C"	7440	17540	130	338	331	117	95	100	32	93	90	0	1123	978	462	38	45	103	92	88	0	0.224	0.251	0.253	0.276	1.943	0.217	0.723	120	637	1328	1176	-2.159	243	1085	236	940	0
2	6	18	"iYMR230W"	"iYMR230W"	7640	17540	130	369	372	111	93	98	30	98	97	0	1981	1708	692	38	44	105	99	97	0	0.142	0.167	0.158	0.175	1.826	0.146	0.770	120	607	2219	1949	-2.816	276	1943	279	1670	0
2	7	18	"iYMR245W"	"iYMR245W"	7840	17540	140	492	479	183	95	102	43	96	92	0	2397	2185	965	38	41	23	99	98	0	0.168	0.179	0.168	0.190	1.931	0.160	0.770	156	664	2756	2531	-2.571	397	2359	384	2147	0
2	8	18	"iYMRWdelta19-0"	"iYMRWdelta19-0"	8040	17540	140	1017	974	386	96	102	46	100	96	0	3005	2746	1255	37	40	22	99	98	0	0.310	0.324	0.322	0.349	1.796	0.302	0.872	156	678	3889	3587	-1.688	921	2968	878	2709	0
2	9	18	"iYMR251W-A"	"iYMR251W-A"	8240	17550	130	345	338	126	95	99	34	93	86	0	813	715	353	37	39	20	98	95	0	0.322	0.358	0.349	0.361	2.125	0.331	0.793	120	592	1026	921	-1.634	250	776	243	678	0
2	10	18	"iYMR267W"	"iYMR267W"	8440	17540	130	1556	1503	555	99	102	33	100	100	0	1308	1210	537	39	42	22	99	98	0	1.148	1.199	1.146	1.307	1.651	1.153	0.908	120	580	2726	2575	0.199	1457	1269	1404	1171	0
2	11	18	"iYMR271C"	"iYMR271C"	8630	17540	140	832	785	276	99	102	31	98	96	0	3045	2588	1055	41	43	26	100	99	0	0.244	0.269	0.264	0.282	1.670	0.256	0.888	156	612	3737	3233	-2.035	733	3004	686	2547	0
2	12	18	"iYMR273C"	"iYMR273C"	8850	17540	130	896	885	289	96	99	29	99	99	0	4155	3503	1469	37	39	17	100	100	0	0.194	0.228	0.219	0.249	1.720	0.209	0.872	120	579	4918	4255	-2.364	800	4118	789	3466	0
2	13	18	"iYMR288W"	"iYMR288W"	9030	17540	130	327	329	126	96	100	30	96	93	0	755	706	295	37	39	21	99	95	0	0.322	0.348	0.329	0.360	1.929	0.313	0.701	120	566	949	902	-1.636	231	718	233	669	0
2	14	18	"iYMR292W"	"iYMR292W"	9240	17550	130	381	377	124	98	104	37	97	95	0	396	376	163	38	40	24	97	95	0	0.791	0.825	0.799	0.874	1.775	0.786	0.707	120	599	641	617	-0.339	283	358	279	338	0
2	15	18	"iYMR296C"	"iYMR296C"	9450	17540	140	506	494	194	98	104	42	96	92	0	1866	1724	783	39	43	50	98	98	0	0.223	0.235	0.232	0.243	1.809	0.216	0.802	156	638	2235	2081	-2.163	408	1827	396	1685	0
2	16	18	"iYNL048W"	"iYNL048W"	9650	17550	140	226	248	124	100	103	39	89	75	0	588	580	290	38	39	21	98	97	0	0.229	0.273	0.242	0.255	2.238	0.235	0.415	156	548	676	690	-2.126	126	550	148	542	0
2	17	18	"iYNL043C"	"iYNL043C"	9840	17550	140	1689	1536	580	102	105	40	100	100	0	2128	1855	869	37	39	20	98	98	0	0.759	0.789	0.778	0.857	1.610	0.747	0.899	156	546	3678	3252	-0.398	1587	2091	1434	1818	0
2	18	18	"iYNL040W"	"iYNL040W"	10050	17550	140	595	597	233	102	104	36	98	95	0	471	457	230	37	38	20	99	98	0	1.136	1.179	1.125	1.189	1.656	1.154	0.798	156	622	927	915	0.184	493	434	495	420	0
2	19	18	"iYNL027W"	"iYNL027W"	10250	17550	140	2966	2754	1095	101	105	37	100	100	0	927	841	400	38	40	21	97	96	0	3.223	3.304	3.313	3.716	1.698	3.335	0.889	156	586	3754	3456	1.688	2865	889	2653	803	0
2	20	18	"iYNL024C"	"iYNL024C"	10440	17550	150	1431	1359	465	101	104	32	100	98	0	1172	1024	442	39	44	40	99	95	0	1.174	1.277	1.298	1.387	1.532	1.257	0.879	156	588	2463	2243	0.231	1330	1133	1258	985	0
2	21	18	"iYNL020C"	"iYNL020C"	10650	17550	140	609	603	191	97	101	32	100	98	0	542	513	199	38	41	37	98	96	0	1.016	1.065	1.072	1.111	1.531	1.067	0.813	156	757	1016	981	0.023	512	504	506	475	0
2	1	19	"iYNL003C"	"iYNL003C"	6650	17750	140	579	556	217	93	98	37	98	96	0	2070	1764	883	42	47	29	100	99	0	0.240	0.269	0.270	0.297	1.601	0.242	0.820	156	724	2514	2185	-2.061	486	2028	463	1722	0
2	2	19	"iYNR001C"	"iYNR001C"	6850	17750	140	1262	1177	418	98	100	30	100	100	0	4781	3905	1751	43	49	28	100	100	0	0.246	0.279	0.272	0.306	1.570	0.262	0.901	156	566	5902	4941	-2.025	1164	4738	1079	3862	0
2	3	19	"iYNR002C"	"iYNR002C"	7050	17740	130	360	361	120	96	99	30	97	95	0	1009	890	382	39	41	19	100	99	0	0.272	0.311	0.303	0.336	2.320	0.264	0.684	120	543	1234	1116	-1.877	264	970	265	851	0
2	4	19	"iYNR018W"	"iYNR018W"	7260	17750	140	881	827	281	96	100	30	99	99	0	3120	2609	1158	40	41	19	100	100	0	0.255	0.285	0.274	0.306	1.601	0.260	0.878	156	551	3865	3300	-1.972	785	3080	731	2569	0
2	5	19	"iYNR022C"	"iYNR022C"	7430	17750	140	454	440	169	94	99	30	97	93	0	1106	969	497	38	39	17	98	98	0	0.337	0.372	0.365	0.416	1.789	0.328	0.800	156	535	1428	1277	-1.569	360	1068	346	931	0
2	6	19	"iYNR027W"	"iYNR027W"	7640	17750	150	186	199	87	95	100	35	85	61	0	462	435	205	38	40	21	97	95	0	0.215	0.262	0.230	0.241	2.606	0.231	0.445	156	650	515	501	-2.220	91	424	104	397	0
2	7	19	"iYOR064C"	"iYOR064C"	7850	17750	150	347	388	213	97	104	53	99	95	0	1140	1144	472	39	44	40	100	99	0	0.227	0.263	0.234	0.256	1.921	0.237	0.521	156	599	1351	1396	-2.139	250	1101	291	1105	0
2	8	19	"iYOR068C"	"iYOR068C"	8050	17750	140	1510	1429	485	98	104	53	100	100	0	2521	2323	1024	38	43	40	100	100	0	0.569	0.582	0.572	0.643	1.531	0.538	0.889	156	558	3895	3616	-0.814	1412	2483	1331	2285	0
2	9	19	"iYOR071C"	"iYOR071C"	8250	17750	150	489	469	153	96	101	36	98	96	0	1228	1050	520	39	41	22	98	98	0	0.331	0.369	0.374	0.424	1.718	0.328	0.862	156	662	1582	1384	-1.597	393	1189	373	1011	0
2	10	19	"iYOR086C"	"iYOR086C"	8470	17720	130	1084	1057	364	98	103	35	100	100	0	3925	3469	1438	38	41	25	100	100	0	0.254	0.280	0.277	0.298	1.576	0.263	0.900	120	550	4873	4390	-1.979	986	3887	959	3431	0
2	11	19	"iYOR090C"	"iYOR090C"	8650	17730	130	472	457	142	100	103	32	100	99	0	2246	2060	842	38	40	23	100	100	0	0.168	0.177	0.174	0.192	1.653	0.163	0.837	120	561	2580	2379	-2.569	372	2208	357	2022	0
2	12	19	"iYOR094W"	"iYOR094W"	8860	17730	130	414	440	221	97	100	31	99	98	0	1279	1173	547	39	41	20	100	100	0	0.256	0.302	0.267	0.317	1.892	0.260	0.618	120	602	1557	1477	-1.968	317	1240	343	1134	0
2	13	19	"iYOR112W"	"iYOR112W"	9060	17730	130	853	840	239	98	102	31	100	100	0	2300	2093	708	39	41	21	100	100	0	0.334	0.361	0.349	0.378	1.414	0.340	0.883	120	588	3016	2796	-1.582	755	2261	742	2054	0
2	14	19	"iYOR116C"	"iYOR116C"	9270	17730	140	553	565	236	100	104	32	98	96	0	3474	3016	1619	38	41	22	100	99	0	0.132	0.156	0.161	0.176	1.939	0.142	0.856	156	596	3889	3443	-2.923	453	3436	465	2978	0
2	15	19	"iYOR121C"	"iYOR121C"	9470	17740	140	609	594	226	97	102	32	98	97	0	1446	1275	553	38	40	19	100	100	0	0.364	0.402	0.378	0.423	1.649	0.375	0.824	156	546	1920	1734	-1.459	512	1408	497	1237	0
2	16	19	"iYOR138C"	"iYOR138C"	9660	17730	130	396	394	138	96	103	41	99	97	0	1335	1166	543	36	39	22	99	99	0	0.231	0.264	0.259	0.285	1.865	0.235	0.780	120	466	1599	1428	-2.114	300	1299	298	1130	0
2	17	19	"itG(CCC)O"	"itG(CCC)O"	9850	17740	140	236	271	179	99	108	49	91	68	0	442	403	200	38	40	23	98	95	0	0.339	0.471	0.418	0.439	2.169	0.513	0.404	156	552	541	537	-1.560	137	404	172	365	0
2	18	19	"iYOR146W"	"iYOR146W"	10050	17740	140	364	373	136	100	107	45	97	90	0	1516	1351	663	39	42	26	99	99	0	0.179	0.208	0.195	0.221	1.963	0.174	0.671	156	591	1741	1585	-2.484	264	1477	273	1312	0
2	19	19	"iYPL228W"	"iYPL228W"	10270	17730	130	409	450	355	100	103	36	100	97	0	609	595	328	39	41	21	99	98	0	0.542	0.629	0.569	0.628	1.629	0.759	0.782	120	493	879	906	-0.883	309	570	350	556	0
2	20	19	"iYPL224C"	"iYPL224C"	10450	17740	140	1013	971	449	102	105	32	100	98	0	2146	1907	1064	43	48	44	98	96	0	0.433	0.466	0.478	0.548	1.757	0.436	0.915	156	536	3014	2733	-1.207	911	2103	869	1864	0
2	21	19	"iYPL220W"	"iYPL220W"	10660	17730	130	845	828	357	102	104	30	100	99	0	2146	1904	758	40	44	39	100	99	0	0.353	0.389	0.376	0.407	1.432	0.376	0.850	120	639	2849	2590	-1.503	743	2106	726	1864	0
2	1	20	"iYPL203W"	"iYPL203W"	6650	17950	140	1560	1463	584	96	101	39	100	100	0	2406	2072	1074	39	44	28	100	99	0	0.619	0.672	0.667	0.767	1.717	0.611	0.864	156	805	3831	3400	-0.693	1464	2367	1367	2033	0
2	2	20	"iYPL199C"	"iYPL199C"	6850	17940	140	430	425	137	96	100	38	99	98	0	1517	1374	602	40	44	27	99	98	0	0.226	0.247	0.233	0.274	2.075	0.216	0.760	156	665	1811	1663	-2.145	334	1477	329	1334	0
2	3	20	"iYPL195W"	"iYPL195W"	7040	17940	140	520	508	208	95	98	32	98	93	0	1305	1166	588	39	42	22	98	97	0	0.336	0.366	0.359	0.408	1.897	0.337	0.770	156	733	1691	1540	-1.575	425	1266	413	1127	0
2	4	20	"itE(UUC)P"	"itE(UUC)P"	7260	17940	140	235	262	131	95	98	29	96	89	0	430	402	191	38	40	20	96	94	0	0.357	0.459	0.391	0.461	2.207	0.467	0.602	156	681	532	531	-1.485	140	392	167	364	0
2	5	20	"iYPL177C-0"	"iYPL177C-0"	7450	17940	140	414	417	147	97	100	33	98	96	0	2161	1999	938	38	39	18	99	98	0	0.149	0.163	0.162	0.180	1.935	0.146	0.804	156	656	2440	2281	-2.744	317	2123	320	1961	0
2	6	20	"iYPL174C"	"iYPL174C"	7660	17940	140	746	753	353	99	102	36	98	98	0	2294	2211	1000	40	42	23	100	100	0	0.287	0.301	0.294	0.296	1.570	0.290	0.822	156	698	2901	2825	-1.801	647	2254	654	2171	0
2	7	20	"iYPL157W"	"iYPL157W"	7860	17950	140	610	631	280	99	104	40	99	97	0	1080	1020	466	39	41	24	99	99	0	0.491	0.542	0.505	0.541	1.657	0.516	0.793	156	670	1552	1513	-1.027	511	1041	532	981	0
2	8	20	"iYPL153C"	"iYPL153C"	8050	17940	140	374	399	156	98	102	35	97	97	0	1510	1396	686	38	40	21	98	98	0	0.188	0.222	0.201	0.240	2.032	0.198	0.757	156	650	1748	1659	-2.415	276	1472	301	1358	0
2	9	20	"iYPL149W"	"iYPL149W"	8250	17950	140	257	259	81	96	101	30	96	89	0	484	474	235	38	41	22	97	96	0	0.361	0.374	0.343	0.384	2.127	0.305	0.630	156	695	607	599	-1.470	161	446	163	436	0
2	10	20	"itG(GCC)P2"	"itG(GCC)P2"	8450	17940	140	1158	1199	490	96	102	36	100	100	0	3062	2788	1211	39	42	28	99	99	0	0.351	0.401	0.391	0.445	1.931	0.380	0.855	156	760	4085	3852	-1.509	1062	3023	1103	2749	0
2	11	20	"iYPR163C"	"iYPR163C"	8650	17940	140	771	762	250	95	99	31	99	98	0	3728	3334	1348	38	39	18	100	100	0	0.183	0.202	0.200	0.209	1.529	0.190	0.902	156	775	4366	3963	-2.449	676	3690	667	3296	0
2	12	20	"iYPR167C"	"iYPR167C"	8860	17940	150	1781	1803	724	96	100	31	100	100	0	4523	3853	1774	38	40	20	99	99	0	0.376	0.447	0.414	0.516	2.104	0.411	0.841	156	841	6170	5522	-1.412	1685	4485	1707	3815	0
2	13	20	"iYPR183W"	"iYPR183W"	9050	17940	140	887	867	363	99	103	32	99	99	0	4443	3934	2037	40	43	25	100	100	0	0.179	0.197	0.196	0.215	1.577	0.181	0.858	156	740	5191	4662	-2.482	788	4403	768	3894	0
2	14	20	"iYPR187W"	"iYPR187W"	9250	17940	150	473	475	167	100	103	31	99	96	0	1860	1670	792	39	41	24	99	98	0	0.205	0.230	0.225	0.260	1.741	0.208	0.820	156	811	2194	2006	-2.287	373	1821	375	1631	0
2	15	20	"iYPR191W"	"iYPR191W"	9450	17940	140	2002	1914	741	99	106	50	100	98	0	5242	4548	2047	38	43	66	99	98	0	0.366	0.402	0.384	0.428	1.591	0.372	0.870	156	707	7107	6325	-1.451	1903	5204	1815	4510	0
2	16	20	"YALCdelta2"	"YALCdelta2"	9650	17940	140	978	934	377	98	106	53	98	95	0	1376	1267	593	39	46	80	94	92	0	0.658	0.681	0.673	0.728	1.778	0.652	0.853	156	742	2217	2064	-0.603	880	1337	836	1228	0
2	17	20	"YBLWTy2-1B"	"YBLWTy2-1B"	9860	17950	140	15292	13905	5947	99	108	45	100	100	0	24497	20518	10770	39	46	41	100	99	0	0.621	0.674	0.650	0.801	1.969	0.626	0.902	156	732	39651	34285	-0.687	15193	24458	13806	20479	0
2	18	20	"YBLWdelta10"	"YBLWdelta10"	10060	17940	140	18706	18565	7995	100	109	45	100	100	0	22030	19825	9616	40	46	41	100	100	0	0.846	0.933	0.917	1.005	1.514	0.905	0.945	156	718	40596	38250	-0.241	18606	21990	18465	19785	0
2	19	20	"YFRWdelta10"	"YFRWdelta10"	10260	17940	140	1126	1047	394	101	109	61	98	98	0	2534	2173	1003	39	43	29	100	100	0	0.411	0.443	0.433	0.472	1.621	0.419	0.910	156	721	3520	3080	-1.283	1025	2495	946	2134	0
2	20	20	"YGRCTy1-2A"	"YGRCTy1-2A"	10450	17940	150	50669	43866	17419	105	111	60	100	100	7	39924	34437	15673	40	46	55	100	100	0	1.268	1.272	1.296	1.373	1.475	1.255	0.937	156	753	90448	78158	0.342	50564	39884	43761	34397	0
2	21	20	"YHLComega1"	"YHLComega1"	10640	17940	150	1807	1732	713	100	104	42	100	100	0	2634	2449	1262	40	42	27	100	99	0	0.658	0.677	0.682	0.762	1.618	0.647	0.864	156	958	4301	4041	-0.604	1707	2594	1632	2409	0
3	1	1	"PET112"	"YBL080C"	11070	14240	140	683	734	334	102	107	34	99	98	0	2047	2071	1116	41	45	74	95	94	0	0.290	0.311	0.316	0.365	2.151	0.283	0.841	156	853	2587	2662	-1.788	581	2006	632	2030	0
3	2	1	"YBL111C"	"YBL111C"	11250	14230	140	7671	6942	2958	103	110	42	100	100	0	21139	18391	8682	41	42	23	100	100	0	0.359	0.373	0.368	0.404	1.520	0.357	0.946	156	727	28666	25189	-1.479	7568	21098	6839	18350	0
3	3	1	"YBR028C"	"YBR028C"	11450	14230	130	974	960	298	103	111	48	100	97	0	2186	2018	720	42	57	313	96	91	0	0.406	0.434	0.432	0.444	1.320	0.417	0.916	120	645	3015	2833	-1.300	871	2144	857	1976	0
3	4	1	"RHK1"	"YBL082C"	11640	14230	140	921	894	332	104	111	45	98	94	0	3882	3594	1475	42	55	281	96	92	0	0.213	0.222	0.218	0.234	1.641	0.213	0.885	156	801	4657	4342	-2.233	817	3840	790	3552	0
3	5	1	"YBL113C"	"YBL113C"	11840	14240	140	8271	7520	2655	105	109	36	100	100	0	13708	12325	4842	41	42	21	100	100	0	0.597	0.604	0.597	0.643	1.386	0.584	0.953	156	763	21833	19699	-0.743	8166	13667	7415	12284	0
3	6	1	"YBR030W"	"YBR030W"	12050	14240	140	506	527	196	104	107	33	99	98	0	1357	1358	603	41	42	21	99	98	0	0.305	0.321	0.323	0.344	1.795	0.300	0.836	156	745	1718	1740	-1.711	402	1316	423	1317	0
3	7	1	"CDC27"	"YBL084C"	12250	14240	140	758	768	284	105	107	31	98	96	0	1751	1674	708	40	43	23	98	97	0	0.382	0.406	0.414	0.428	1.533	0.393	0.875	156	714	2364	2297	-1.390	653	1711	663	1634	0
3	8	1	"RER2"	"YBR002C"	12440	14240	140	1844	1972	766	106	110	44	100	99	0	1754	1746	756	40	45	42	99	98	0	1.014	1.094	1.078	1.165	1.508	1.089	0.905	156	669	3452	3572	0.020	1738	1714	1866	1706	0
3	9	1	"YBR032W"	"YBR032W"	12620	14240	140	1337	1217	441	106	113	55	98	96	0	2015	1779	753	41	46	43	98	96	0	0.624	0.639	0.634	0.686	1.684	0.615	0.917	156	757	3205	2849	-0.681	1231	1974	1111	1738	0
3	10	1	"YBL086C"	"YBL086C"	12850	14240	130	254	274	121	102	110	50	88	73	0	807	794	377	40	46	57	97	96	0	0.198	0.228	0.218	0.219	2.117	0.190	0.552	120	706	919	926	-2.335	152	767	172	754	0
3	11	1	"YBR004C"	"YBR004C"	13050	14240	140	2144	2017	798	104	110	38	99	99	0	999	917	417	40	48	87	94	90	0	2.127	2.181	2.220	2.377	1.553	2.206	0.893	156	780	2999	2790	1.089	2040	959	1913	877	0
3	12	1	"HMT1"	"YBR034C"	13240	14240	130	2059	1959	746	105	124	143	97	95	0	2606	2332	1024	42	63	168	95	92	0	0.762	0.810	0.794	0.891	1.601	0.760	0.915	120	658	4518	4144	-0.392	1954	2564	1854	2290	0
3	13	1	"YCL044C"	"YCL044C"	13430	14240	130	141	150	58	105	121	141	5	0	0	115	120	62	41	59	163	8	0	0	0.486	0.570	0.762	0.670	2.623	0.896	0.771	120	678	110	124	-1.040	36	74	45	79	0
3	14	1	"YCLX03C"	"YCLX03C"	13620	14240	130	2164	2086	636	103	109	80	100	99	0	3307	2953	1060	40	41	19	100	99	0	0.631	0.681	0.668	0.756	1.559	0.664	0.923	120	679	5328	4896	-0.665	2061	3267	1983	2913	0
3	15	1	"YCR022C"	"YCR022C"	13810	14240	130	1771	1690	534	103	115	104	98	97	0	3427	2979	1142	42	53	125	97	97	0	0.493	0.540	0.533	0.593	1.555	0.507	0.924	120	724	5053	4524	-1.021	1668	3385	1587	2937	0
3	16	1	"YCL046W"	"YCL046W"	14050	14240	150	117	139	79	106	116	96	10	3	0	63	88	90	43	53	114	9	5	0	0.550	0.733	1.017	0.951	3.944	0.934	0.304	156	885	31	78	-0.862	11	20	33	45	-50
3	17	1	"YCLX05C"	"YCLX05C"	14210	14240	130	1804	1765	733	108	140	225	93	89	0	3229	3005	1327	43	96	395	91	88	0	0.532	0.559	0.543	0.580	1.425	0.535	0.937	120	639	4882	4619	-0.910	1696	3186	1657	2962	0
3	18	1	"YCR024C"	"YCR024C"	14430	14240	150	1243	1453	912	105	134	207	100	98	0	1961	2037	832	42	90	364	99	95	0	0.593	0.676	0.572	0.647	1.659	0.697	0.750	156	988	3057	3343	-0.754	1138	1919	1348	1995	0
3	19	1	"YCL048W"	"YCL048W"	14650	14230	80	117	149	91	101	104	33	34	25	0	77	117	105	41	54	130	26	7	0	0.444	0.632	0.542	0.562	2.599	0.102	0.068	52	307	52	124	-1.170	16	36	48	76	0
3	20	1	"YCLX07W"	"YCLX07W"	14840	14250	140	2545	2553	1211	101	104	35	99	98	0	2595	2419	1308	40	43	33	96	94	0	0.957	1.031	1.003	1.165	1.722	0.996	0.940	156	792	4999	4831	-0.064	2444	2555	2452	2379	0
3	21	1	"YCR025C"	"YCR025C"	15020	14240	130	507	479	158	101	104	41	95	95	0	2396	2058	927	41	53	124	93	90	0	0.172	0.187	0.180	0.209	2.114	0.165	0.792	120	739	2761	2395	-2.536	406	2355	378	2017	0
3	1	2	"APA1"	"YCL050C"	11020	14450	110	147	194	260	102	109	44	51	30	0	114	164	178	42	48	98	36	16	0	0.625	0.754	0.752	0.740	3.354	0.795	0.297	80	485	117	214	-0.678	45	72	92	122	0
3	2	2	"YCLX09W"	"YCLX09W"	11220	14450	140	1455	1451	589	103	107	34	98	98	0	4123	3931	1850	42	47	84	99	96	0	0.331	0.347	0.339	0.374	1.515	0.328	0.931	156	667	5433	5237	-1.594	1352	4081	1348	3889	0
3	3	2	"RSG1"	"YCR027C"	11440	14450	140	3512	3287	1068	104	110	41	100	100	0	6240	5345	2226	42	45	30	100	100	0	0.550	0.600	0.590	0.669	1.604	0.562	0.931	156	783	9606	8486	-0.863	3408	6198	3183	5303	0
3	4	2	"YDL211C"	"YDL211C"	11670	14460	110	266	286	136	102	110	42	86	75	0	740	863	698	43	46	27	88	82	0	0.235	0.224	0.226	0.332	3.013	0.192	0.704	80	473	861	1004	-2.087	164	697	184	820	0
3	5	2	"AAD4"	"YDL243C"	11820	14450	130	125	137	65	103	110	38	32	14	0	135	140	77	41	43	22	88	78	0	0.234	0.343	0.447	0.361	3.801	0.548	0.177	120	546	116	133	-2.095	22	94	34	99	0
3	6	2	"LUV1"	"YDR027C"	12020	14450	140	1375	1294	411	104	112	80	99	99	0	2469	2193	819	40	46	51	98	98	0	0.523	0.553	0.553	0.594	1.600	0.532	0.932	156	646	3700	3343	-0.934	1271	2429	1190	2153	0
3	7	2	"YDL213C"	"YDL213C"	12230	14450	140	325	337	155	102	111	81	87	64	0	942	972	554	40	45	48	95	94	0	0.247	0.252	0.239	0.254	1.953	0.243	0.622	156	620	1125	1167	-2.016	223	902	235	932	0
3	8	2	"HXT15"	"YDL245C"	12440	14450	140	5906	5678	1885	106	111	51	100	100	0	14108	12199	5431	41	47	44	99	99	0	0.412	0.458	0.441	0.529	1.768	0.419	0.920	156	565	19867	17730	-1.278	5800	14067	5572	12158	0
3	9	2	"YDR029W"	"YDR029W"	12620	14450	140	1021	949	327	107	114	58	100	96	0	3359	2865	1163	41	47	46	100	97	0	0.275	0.298	0.298	0.325	1.638	0.286	0.916	156	575	4232	3666	-1.860	914	3318	842	2824	0
3	10	2	"GDH2"	"YDL215C"	12830	14450	140	341	369	166	101	111	58	95	86	0	1211	1200	594	41	49	90	92	91	0	0.205	0.231	0.223	0.251	1.974	0.215	0.759	156	720	1410	1427	-2.285	240	1170	268	1159	0
3	11	2	"YDL247W"	"YDL247W"	13050	14450	130	293	294	98	101	109	55	91	79	0	1082	1008	496	41	47	81	92	89	0	0.184	0.200	0.190	0.225	2.163	0.177	0.622	120	608	1233	1160	-2.439	192	1041	193	967	0
3	12	2	"YDR031W"	"YDR031W"	13230	14450	130	514	508	171	105	115	103	93	88	0	1680	1494	619	42	53	138	93	90	0	0.250	0.278	0.280	0.301	1.800	0.248	0.836	120	598	2047	1855	-2.002	409	1638	403	1452	0
3	13	2	"TIM22"	"YDL217C"	13430	14450	130	392	386	141	103	110	80	88	82	0	1361	1260	680	41	43	42	94	94	0	0.219	0.232	0.230	0.270	2.088	0.209	0.814	120	647	1609	1502	-2.191	289	1320	283	1219	0
3	14	2	"NTH1"	"YDR001C"	13640	14450	130	602	620	224	102	109	82	97	93	0	314	312	136	42	42	21	96	92	0	1.838	1.919	1.929	2.020	1.712	0.190	0.061	120	629	772	788	0.878	500	272	518	270	0
3	15	2	"MRH1"	"YDR033W"	13840	14450	140	726	701	290	100	113	104	96	89	0	1308	1237	589	42	52	127	93	89	0	0.494	0.503	0.514	0.533	1.618	0.478	0.856	156	683	1892	1796	-1.016	626	1266	601	1195	0
3	16	2	"YDR346C"	"YDR346C"	14050	14460	140	509	625	406	102	107	39	100	95	0	1009	1353	1045	42	46	50	99	97	0	0.421	0.399	0.403	0.433	1.962	0.365	0.797	156	604	1374	1834	-1.248	407	967	523	1311	0
3	17	2	"LSM6"	"YDR378C"	14240	14450	130	488	473	140	104	111	66	95	93	0	2714	2504	911	42	50	72	100	98	0	0.144	0.150	0.148	0.153	1.393	0.137	0.834	120	578	3056	2831	-2.799	384	2672	369	2462	0
3	18	2	"STE14"	"YDR410C"	14440	14450	130	2272	2263	674	101	106	36	100	100	0	4334	4143	1349	42	44	27	100	100	0	0.506	0.527	0.522	0.548	1.332	0.516	0.952	120	650	6463	6263	-0.983	2171	4292	2162	4101	0
3	19	2	"YDR348C"	"YDR348C"	14640	14430	110	141	161	137	102	106	33	53	26	0	122	130	83	43	53	98	33	8	0	0.494	0.678	0.535	0.618	3.736	1.560	0.156	80	567	118	146	-1.018	39	79	59	87	0
3	20	2	"YDR380W"	"YDR380W"	14840	14450	130	2538	2514	904	105	113	60	100	100	0	5418	4965	1843	42	68	235	100	96	0	0.453	0.489	0.468	0.518	1.416	0.472	0.911	120	633	7809	7332	-1.144	2433	5376	2409	4923	0
3	21	2	"YDR412W"	"YDR412W"	15040	14450	130	778	762	204	102	111	60	100	99	0	3620	3327	1019	41	72	251	97	95	0	0.189	0.201	0.196	0.209	1.430	0.191	0.901	120	711	4255	3946	-2.404	676	3579	660	3286	0
3	1	3	"TCM10"	"YDR350C"	11060	14660	140	1668	1705	638	105	112	45	100	100	0	5902	5284	1936	42	49	69	100	100	0	0.267	0.305	0.288	0.321	1.609	0.294	0.886	156	746	7423	6842	-1.907	1563	5860	1600	5242	0
3	2	3	"RPP2B"	"YDR382W"	11240	14660	140	444	437	147	102	106	33	98	96	0	1577	1471	700	42	44	29	98	96	0	0.223	0.234	0.235	0.257	1.756	0.216	0.875	156	580	1877	1764	-2.166	342	1535	335	1429	0
3	3	3	"ERD1"	"YDR414C"	11450	14660	140	1832	1738	559	101	106	35	100	100	0	6989	6336	2246	41	42	22	100	100	0	0.249	0.260	0.258	0.265	1.468	0.250	0.924	156	617	8679	7932	-2.005	1731	6948	1637	6295	0
3	4	3	"YDR352W"	"YDR352W"	11640	14660	150	2745	2830	1235	103	108	36	100	100	0	3881	3587	1514	41	44	30	99	98	0	0.688	0.769	0.712	0.865	1.967	0.759	0.874	156	630	6482	6273	-0.539	2642	3840	2727	3546	0
3	5	3	"YDR384C"	"YDR384C"	11840	14660	140	895	905	301	103	109	35	100	100	0	2963	2880	1255	40	45	35	99	96	0	0.271	0.282	0.278	0.325	1.876	0.261	0.904	156	604	3715	3642	-1.884	792	2923	802	2840	0
3	6	3	"SYF1"	"YDR416W"	12050	14660	140	1333	1341	559	105	113	86	100	98	0	4946	4847	2268	39	46	60	100	100	0	0.250	0.257	0.259	0.268	1.540	0.246	0.924	156	613	6135	6044	-1.999	1228	4907	1236	4808	0
3	7	3	"SHC1"	"YER096W"	12250	14650	140	1884	1771	512	102	111	83	100	99	0	5701	5082	1723	40	47	56	100	98	0	0.315	0.331	0.327	0.353	1.396	0.320	0.946	156	601	7443	6711	-1.668	1782	5661	1669	5042	0
3	8	3	"LCP5"	"YER127W"	12450	14660	140	2102	2064	403	103	109	40	100	100	0	6543	6104	1638	41	44	24	100	100	0	0.307	0.323	0.315	0.343	1.477	0.307	0.935	156	561	8501	8024	-1.702	1999	6502	1961	6063	0
3	9	3	"BUR6"	"YER159C"	12640	14660	140	757	728	215	105	109	39	98	98	0	4319	3877	1473	40	43	25	98	97	0	0.152	0.162	0.164	0.188	1.961	0.152	0.902	156	564	4931	4460	-2.714	652	4279	623	3837	0
3	10	3	"UBP9"	"YER098W"	12830	14650	130	4002	3816	1088	101	106	32	100	100	0	7436	6888	2336	39	40	19	100	100	0	0.527	0.542	0.528	0.575	1.382	0.521	0.947	120	591	11298	10564	-0.923	3901	7397	3715	6849	0
3	11	3	"PAK1"	"YER129W"	13040	14660	130	3047	3366	1758	104	110	53	100	100	0	4004	4070	2150	41	42	23	100	100	0	0.743	0.810	0.777	0.833	1.536	0.808	0.931	120	658	6906	7291	-0.429	2943	3963	3262	4029	0
3	12	3	"SPT2"	"YER161C"	13250	14650	130	2701	2593	657	104	110	43	100	100	0	12086	10879	3349	42	45	43	100	100	0	0.216	0.230	0.227	0.241	1.296	0.221	0.958	120	645	14641	13326	-2.213	2597	12044	2489	10837	0
3	13	3	"UBC6"	"YER100W"	13460	14650	130	2444	2315	668	104	107	41	100	100	0	6144	5584	1990	41	42	22	100	100	0	0.383	0.399	0.392	0.441	1.548	0.380	0.937	120	631	8443	7754	-1.383	2340	6103	2211	5543	0
3	14	3	"RPS26B"	"YER131W"	13660	14650	130	1754	1727	590	103	106	35	100	99	0	5626	5149	1774	42	43	37	99	98	0	0.296	0.318	0.315	0.350	1.701	0.316	0.908	120	594	7235	6731	-1.758	1651	5584	1624	5107	0
3	15	3	"YER163C"	"YER163C"	13860	14660	140	1350	1259	386	102	108	36	99	99	0	5865	5133	1861	41	43	30	100	100	0	0.214	0.227	0.222	0.238	1.491	0.218	0.934	156	663	7072	6249	-2.222	1248	5824	1157	5092	0
3	16	3	"RPS8B"	"YER102W"	14080	14650	140	901	833	315	102	105	32	98	97	0	5784	4954	2065	41	43	46	99	98	0	0.139	0.149	0.145	0.157	1.806	0.144	0.918	156	574	6542	5644	-2.846	799	5743	731	4913	0
3	17	3	"GLC7"	"YER133W"	14250	14650	130	920	928	291	103	107	30	100	99	0	4013	3864	1445	42	47	53	100	99	0	0.206	0.216	0.209	0.234	1.534	0.206	0.935	120	527	4788	4647	-2.281	817	3971	825	3822	0
3	18	3	"PAB1"	"YER165W"	14440	14660	130	830	850	264	101	106	36	100	100	0	3417	3405	1201	42	49	109	100	98	0	0.216	0.223	0.215	0.233	1.537	0.210	0.897	120	612	4104	4112	-2.211	729	3375	749	3363	0
3	19	3	"CDC43"	"YGL155W"	14650	14660	130	3167	3046	799	103	107	37	100	100	0	6138	5668	1714	41	48	104	99	98	0	0.503	0.523	0.511	0.556	1.481	0.519	0.951	120	671	9161	8570	-0.993	3064	6097	2943	5627	0
3	20	3	"COX4"	"YGL187C"	14850	14660	130	1266	1230	395	107	114	61	100	97	0	2687	2541	884	40	62	240	95	92	0	0.438	0.449	0.451	0.486	1.597	0.438	0.939	120	581	3806	3624	-1.191	1159	2647	1123	2501	0
3	21	3	"YGL219C"	"YGL219C"	15040	14650	130	1894	1868	522	104	108	33	100	100	0	5188	4773	1652	39	41	32	100	100	0	0.348	0.373	0.363	0.393	1.342	0.354	0.948	120	664	6939	6498	-1.524	1790	5149	1764	4734	0
3	1	4	"YGL157W"	"YGL157W"	11070	14860	130	2570	2610	906	105	113	46	100	100	0	7142	6544	2255	41	50	76	100	99	0	0.347	0.385	0.373	0.417	1.553	0.373	0.933	120	684	9566	9008	-1.526	2465	7101	2505	6503	0
3	2	4	"RPS26A"	"YGL189C"	11260	14850	130	1684	1675	600	100	105	34	100	100	0	4640	4268	1587	40	44	40	100	99	0	0.344	0.373	0.356	0.407	1.540	0.354	0.913	120	545	6184	5803	-1.538	1584	4600	1575	4228	0
3	3	4	"NIF3"	"YGL221C"	11450	14860	130	1179	1135	306	101	106	38	100	99	0	6332	5757	1835	40	40	22	100	100	0	0.171	0.181	0.176	0.192	1.443	0.172	0.942	120	595	7370	6751	-2.545	1078	6292	1034	5717	0
3	4	4	"YGL159W"	"YGL159W"	11660	14850	130	1358	1281	388	104	109	39	99	99	0	4452	4063	1413	41	43	31	100	99	0	0.284	0.293	0.290	0.319	1.552	0.281	0.934	120	511	5665	5199	-1.815	1254	4411	1177	4022	0
3	5	4	"COX13"	"YGL191W"	11840	14860	140	960	919	234	104	109	40	100	98	0	3068	2729	917	41	44	29	99	99	0	0.283	0.303	0.296	0.337	1.656	0.286	0.922	156	598	3883	3503	-1.822	856	3027	815	2688	0
3	6	4	"YGL223C"	"YGL223C"	12060	14850	130	2609	2479	595	105	122	114	100	100	0	6111	5400	1766	40	74	281	99	99	0	0.412	0.443	0.426	0.471	1.375	0.409	0.928	120	561	8575	7734	-1.278	2504	6071	2374	5360	0
3	7	4	"YGL161C"	"YGL161C"	12240	14860	130	1321	1288	304	104	121	112	100	98	0	6068	5508	1691	41	76	280	99	96	0	0.202	0.217	0.208	0.230	1.446	0.207	0.933	120	566	7244	6651	-2.308	1217	6027	1184	5467	0
3	8	4	"YGL193C"	"YGL193C"	12440	14850	130	1176	1131	336	104	114	98	100	96	0	3122	2831	936	41	52	83	100	100	0	0.348	0.368	0.352	0.383	1.409	0.355	0.927	120	589	4153	3817	-1.523	1072	3081	1027	2790	0
3	9	4	"GOG5"	"YGL225W"	12650	14850	140	4760	4490	1445	102	107	54	100	100	0	6558	5766	2136	40	43	27	99	99	0	0.715	0.766	0.759	0.831	1.561	0.746	0.955	156	652	11176	10114	-0.485	4658	6518	4388	5726	0
3	10	4	"RNH70"	"YGR276C"	12870	14860	130	1781	1722	482	102	106	41	100	100	0	5262	4777	1624	39	40	21	100	100	0	0.321	0.342	0.339	0.363	1.399	0.325	0.944	120	598	6902	6358	-1.637	1679	5223	1620	4738	0
3	11	4	"YHL012W"	"YHL012W"	13050	14860	130	9763	9548	2816	102	106	32	100	100	0	3782	3662	1128	39	41	20	100	100	0	2.581	2.607	2.539	2.637	1.230	2.631	0.959	120	564	13404	13069	1.368	9661	3743	9446	3623	0
3	12	4	"YHL044W"	"YHL044W"	13260	14860	140	3528	3238	995	105	109	35	100	100	0	5582	4863	1883	40	42	22	99	99	0	0.618	0.650	0.634	0.697	1.444	0.623	0.955	156	678	8965	7956	-0.695	3423	5542	3133	4823	0
3	13	4	"YGR278W"	"YGR278W"	13460	14850	130	2803	2674	719	107	110	44	100	100	0	7525	6862	2254	41	50	201	100	96	0	0.360	0.376	0.375	0.402	1.367	0.358	0.954	120	562	10180	9388	-1.473	2696	7484	2567	6821	0
3	14	4	"YLF2"	"YHL014C"	13640	14850	130	9901	9565	2169	106	113	53	100	100	0	3991	3716	1000	42	54	197	100	100	0	2.480	2.575	2.508	2.637	1.294	2.574	0.951	120	614	13744	13133	1.311	9795	3949	9459	3674	0
3	15	4	"YHL046C"	"YHL046C"	13860	14860	130	13011	12401	3338	105	115	56	100	100	0	17381	16049	4889	42	45	36	100	100	0	0.744	0.768	0.761	0.800	1.233	0.751	0.971	120	593	30245	28303	-0.426	12906	17339	12296	16007	0
3	16	4	"YGR280C"	"YGR280C"	14050	14850	130	2137	2026	521	104	108	38	100	100	0	8466	7707	2183	40	47	107	100	100	0	0.241	0.251	0.247	0.259	1.300	0.246	0.954	120	611	10459	9589	-2.051	2033	8426	1922	7667	0
3	17	4	"DUR3"	"YHL016C"	14260	14850	130	12601	11685	2990	104	108	34	100	100	0	6582	5968	1867	41	47	104	100	100	0	1.911	1.954	1.925	2.074	1.332	1.933	0.965	120	652	19038	17508	0.934	12497	6541	11581	5927	0
3	18	4	"COS8"	"YHL048W"	14460	14850	130	6517	6101	1796	103	110	39	100	100	0	11069	10000	3288	41	46	108	100	100	0	0.582	0.602	0.602	0.628	1.282	0.588	0.963	120	598	17442	15957	-0.782	6414	11028	5998	9959	0
3	19	4	"BGL2"	"YGR282C"	14650	14850	130	3407	3304	643	100	106	35	100	100	0	4039	3689	992	40	45	107	100	100	0	0.827	0.878	0.864	0.909	1.244	0.845	0.948	120	608	7306	6853	-0.274	3307	3999	3204	3649	0
3	20	4	"YHL018W"	"YHL018W"	14880	14850	140	3238	3038	1050	103	108	43	100	100	0	3851	3369	1332	39	41	21	99	98	0	0.822	0.881	0.881	0.958	1.539	0.859	0.948	156	654	6947	6265	-0.282	3135	3812	2935	3330	0
3	21	4	"YHL050C"	"YHL050C"	15060	14850	130	13971	14620	6025	104	108	33	100	100	0	25619	25573	9139	40	41	19	100	100	0	0.542	0.569	0.544	0.573	1.309	0.573	0.946	120	643	39446	40049	-0.883	13867	25579	14516	25533	0
3	1	5	"YIL086C"	"YIL086C"	11070	15060	80	151	162	56	103	106	32	61	36	0	119	134	96	40	41	21	80	59	0	0.608	0.628	0.761	0.701	4.428	0.538	0.339	52	322	127	153	-0.719	48	79	59	94	0
3	2	5	"RHO3"	"YIL118W"	11250	15050	130	1515	1487	419	101	105	33	100	100	0	3209	2953	1048	40	45	39	100	100	0	0.446	0.476	0.474	0.501	1.411	0.447	0.927	120	645	4583	4299	-1.164	1414	3169	1386	2913	0
3	3	5	"DNA43"	"YIL150C"	11450	15060	130	2009	1952	432	102	106	43	100	100	0	6741	6269	1722	39	43	35	100	100	0	0.285	0.297	0.287	0.308	1.382	0.283	0.921	120	611	8609	8080	-1.813	1907	6702	1850	6230	0
3	4	5	"YIL088C"	"YIL088C"	11650	15050	140	3525	3202	1004	102	106	42	99	99	0	7689	6617	2297	40	42	23	99	99	0	0.448	0.471	0.456	0.484	1.631	0.458	0.944	156	630	11072	9677	-1.160	3423	7649	3100	6577	0
3	5	5	"YIL120W"	"YIL120W"	11850	15060	140	5018	4828	1098	101	107	44	100	100	0	5681	5147	1483	39	41	24	100	100	0	0.871	0.925	0.892	0.992	1.496	0.903	0.932	156	606	10559	9835	-0.198	4917	5642	4727	5108	0
3	6	5	"YIL152W"	"YIL152W"	12050	15050	130	3153	3059	828	102	118	104	100	100	0	2751	2481	823	40	62	236	97	96	0	1.125	1.211	1.188	1.278	1.393	1.170	0.931	120	590	5762	5398	0.170	3051	2711	2957	2441	0
3	7	5	"YIL090W"	"YIL090W"	12270	15060	140	1762	1707	421	102	117	109	100	98	0	5975	5381	1804	40	53	107	99	98	0	0.280	0.301	0.288	0.329	1.618	0.281	0.907	156	660	7595	6946	-1.838	1660	5935	1605	5341	0
3	8	5	"YIL122W"	"YIL122W"	12470	15060	130	2195	2107	678	103	120	119	100	99	0	4028	3664	1280	40	55	120	98	96	0	0.525	0.553	0.545	0.589	1.580	0.533	0.930	120	582	6080	5628	-0.931	2092	3988	2004	3624	0
3	9	5	"IMP2'"	"YIL154C"	12650	15050	130	654	658	158	101	106	52	99	98	0	1430	1359	373	39	42	49	100	100	0	0.398	0.422	0.411	0.427	1.369	0.405	0.905	120	596	1944	1877	-1.331	553	1391	557	1320	0
3	10	5	"YIL092W"	"YIL092W"	12860	15050	130	4322	4152	1064	103	107	40	100	100	0	5511	5074	1380	38	40	21	100	100	0	0.771	0.804	0.761	0.817	1.354	0.793	0.940	120	629	9692	9085	-0.375	4219	5473	4049	5036	0
3	11	5	"AYR1"	"YIL124W"	13060	15050	130	2364	2266	551	101	107	47	100	100	0	3994	3654	1034	39	40	20	100	100	0	0.572	0.599	0.597	0.613	1.322	0.587	0.930	120	577	6218	5780	-0.805	2263	3955	2165	3615	0
3	12	5	"UBP7"	"YIL156W"	13250	15060	140	4787	4774	1932	103	107	35	99	99	0	5329	4929	2359	39	40	19	98	98	0	0.885	0.955	0.925	1.065	1.729	0.918	0.919	156	629	9974	9561	-0.176	4684	5290	4671	4890	0
3	13	5	"BNA1"	"YJR025C"	13460	15050	130	727	756	293	103	108	35	99	98	0	2392	2287	903	41	49	193	99	96	0	0.265	0.291	0.286	0.294	1.605	0.257	0.789	120	611	2975	2899	-1.914	624	2351	653	2246	0
3	14	5	"CDC8"	"YJR057W"	13660	15050	130	873	863	255	104	110	49	100	99	0	4099	3882	1220	40	50	196	99	97	0	0.189	0.198	0.195	0.203	1.512	0.191	0.916	120	615	4828	4601	-2.400	769	4059	759	3842	0
3	15	5	"GRR1"	"YJR090C"	13860	15050	130	598	618	248	106	111	38	98	98	0	1118	1080	517	40	44	45	98	97	0	0.456	0.492	0.480	0.511	1.476	0.480	0.884	120	612	1570	1552	-1.132	492	1078	512	1040	0
3	16	5	"YJR027W"	"YJR027W"	14070	15060	130	861	853	341	104	109	43	97	96	0	1485	1382	660	41	49	111	90	89	0	0.524	0.559	0.566	0.612	1.925	0.519	0.843	120	615	2201	2090	-0.932	757	1444	749	1341	0
3	17	5	"PTK2"	"YJR059W"	14260	15070	120	604	612	229	101	105	33	97	95	0	2037	2047	997	41	48	112	97	95	0	0.252	0.255	0.251	0.266	1.602	0.234	0.877	120	557	2499	2517	-1.988	503	1996	511	2006	0
3	18	5	"BUD4"	"YJR092W"	14460	15060	130	201	228	85	103	107	35	90	74	0	289	300	160	40	41	23	92	91	0	0.394	0.481	0.483	0.476	2.029	0.466	0.602	120	577	347	385	-1.345	98	249	125	260	0
3	19	5	"YJR029W"	"YJR029W"	14650	15060	140	3461	3496	1425	102	108	46	100	100	0	5698	5712	2561	40	42	41	99	99	0	0.594	0.598	0.592	0.636	1.526	0.576	0.929	156	698	9017	9066	-0.752	3359	5658	3394	5672	0
3	20	5	"YJR061W"	"YJR061W"	14870	15060	120	259	257	82	102	107	45	92	78	0	415	409	167	40	41	21	99	98	0	0.419	0.420	0.398	0.405	2.236	0.308	0.407	120	524	532	524	-1.256	157	375	155	369	0
3	21	5	"IME1"	"YJR094C"	15050	15050	130	739	757	277	106	109	35	100	100	0	1844	1920	823	39	40	21	100	100	0	0.351	0.346	0.340	0.359	1.605	0.325	0.883	120	636	2438	2532	-1.512	633	1805	651	1881	0
3	1	6	"GEA1"	"YJR031C"	11040	15250	130	1177	1253	500	103	105	30	100	100	0	1918	1895	690	39	40	20	100	100	0	0.572	0.620	0.622	0.612	1.430	0.615	0.844	120	743	2953	3006	-0.807	1074	1879	1150	1856	0
3	2	6	"RPA12"	"YJR063W"	11260	15250	110	542	528	229	106	108	34	100	97	0	2026	1887	903	41	49	56	98	98	0	0.220	0.229	0.218	0.243	1.779	0.200	0.756	80	522	2421	2268	-2.187	436	1985	422	1846	0
3	3	6	"SFC1"	"YJR095W"	11450	15270	120	496	539	185	104	108	40	100	99	0	1211	1317	569	40	47	54	100	100	0	0.335	0.341	0.333	0.348	1.582	0.306	0.776	120	563	1563	1712	-1.579	392	1171	435	1277	0
3	4	6	"YKR020W"	"YKR020W"	11660	15250	130	876	971	432	101	106	43	100	100	0	2699	2733	1268	39	42	25	100	100	0	0.291	0.323	0.320	0.325	1.413	0.310	0.907	120	619	3435	3564	-1.779	775	2660	870	2694	0
3	5	6	"MRS4"	"YKR052C"	11880	15250	130	2182	2269	1128	102	108	44	100	100	0	1584	1612	899	37	41	25	97	95	0	1.345	1.376	1.366	1.543	1.690	1.338	0.925	120	549	3627	3742	0.427	2080	1547	2167	1575	0
3	6	6	"HBS1"	"YKR084C"	12070	15250	140	1283	1274	413	100	107	41	100	100	0	3221	3025	997	37	39	19	100	100	0	0.372	0.393	0.384	0.405	1.387	0.377	0.884	156	554	4367	4162	-1.428	1183	3184	1174	2988	0
3	7	6	"YKR022C"	"YKR022C"	12250	15260	140	2431	2736	1516	99	105	49	98	98	0	2548	2662	1632	37	38	19	100	98	0	0.929	1.005	0.978	1.180	1.851	0.976	0.931	156	582	4843	5262	-0.107	2332	2511	2637	2625	0
3	8	6	"DYN1"	"YKR054C"	12460	15260	120	146	177	102	102	109	66	41	15	0	131	157	111	38	44	63	62	40	0	0.473	0.630	0.679	0.625	3.089	1.267	0.309	120	557	137	194	-1.080	44	93	75	119	0
3	9	6	"PRP16"	"YKR086W"	12670	15260	120	535	629	388	100	104	35	100	99	0	901	1110	723	37	40	50	99	99	0	0.503	0.493	0.477	0.483	1.616	0.481	0.837	120	554	1299	1602	-0.990	435	864	529	1073	0
3	10	6	"DBP7"	"YKR024C"	12870	15260	120	498	600	391	102	106	47	99	95	0	518	616	481	37	40	41	95	93	0	0.823	0.860	0.897	0.965	2.334	0.819	0.818	120	553	877	1077	-0.281	396	481	498	579	0
3	11	6	"RNC1"	"YKR056W"	13070	15260	130	330	382	196	101	106	47	98	83	0	1484	1725	1040	38	41	40	100	99	0	0.158	0.167	0.155	0.160	1.720	0.160	0.775	120	591	1675	1968	-2.659	229	1446	281	1687	0
3	12	6	"YKR088C"	"YKR088C"	13270	15250	120	406	450	214	99	105	39	97	95	0	808	884	555	39	40	19	96	95	0	0.399	0.415	0.439	0.469	1.867	0.382	0.846	120	509	1076	1196	-1.325	307	769	351	845	0
3	13	6	"GCN3"	"YKR026C"	13460	15250	130	2228	2154	480	102	106	42	100	100	0	5252	4761	1449	39	41	23	100	100	0	0.408	0.435	0.427	0.456	1.316	0.414	0.928	120	563	7339	6774	-1.294	2126	5213	2052	4722	0
3	14	6	"GLG1"	"YKR058W"	13650	15250	130	815	873	344	102	107	36	100	100	0	3077	3200	1438	40	41	23	100	100	0	0.235	0.244	0.237	0.254	1.559	0.231	0.896	120	595	3750	3931	-2.091	713	3037	771	3160	0
3	15	6	"YKR090W"	"YKR090W"	13860	15250	120	288	324	147	103	108	34	99	93	0	642	710	371	40	42	22	95	95	0	0.307	0.330	0.291	0.322	1.862	0.325	0.559	120	556	787	891	-1.702	185	602	221	670	0
3	16	6	"YLR231C"	"YLR231C"	14060	15250	130	1910	1861	420	103	108	41	100	100	0	4765	4324	1166	41	44	38	100	100	0	0.383	0.410	0.410	0.423	1.341	0.389	0.921	120	579	6531	6041	-1.386	1807	4724	1758	4283	0
3	17	6	"RED1"	"YLR263W"	14250	15260	120	709	817	400	101	104	31	100	100	0	2665	2821	1569	40	42	22	100	100	0	0.232	0.257	0.263	0.269	1.525	0.245	0.908	120	515	3233	3497	-2.110	608	2625	716	2781	0
3	18	6	"YLR294C"	"YLR294C"	14460	15250	130	483	475	112	101	104	30	100	100	0	2547	2309	708	39	42	43	100	100	0	0.152	0.165	0.162	0.172	1.505	0.154	0.877	120	594	2890	2644	-2.715	382	2508	374	2270	0
3	19	6	"EST1"	"YLR233C"	14660	15260	130	1185	1167	253	102	106	34	100	100	0	4427	4143	1129	39	42	46	100	100	0	0.247	0.260	0.252	0.270	1.428	0.246	0.923	120	540	5471	5169	-2.019	1083	4388	1065	4104	0
3	20	6	"YLR265C"	"YLR265C"	14870	15260	150	1802	1862	727	103	105	30	100	100	0	2878	2797	1144	39	39	18	100	99	0	0.598	0.638	0.604	0.666	1.579	0.621	0.912	156	599	4538	4517	-0.741	1699	2839	1759	2758	0
3	21	6	"YLR296W"	"YLR296W"	15060	15250	140	210	223	83	104	106	34	91	69	0	853	904	404	38	40	21	99	99	0	0.130	0.137	0.126	0.128	2.202	0.127	0.570	156	710	921	985	-2.943	106	815	119	866	0
3	1	7	"YLR235C"	"YLR235C"	11060	15460	140	857	825	264	102	107	36	99	99	0	2173	1930	735	38	40	20	100	100	0	0.354	0.382	0.377	0.401	1.676	0.365	0.917	156	726	2890	2615	-1.500	755	2135	723	1892	0
3	2	7	"BOP2"	"YLR267W"	11260	15460	150	1310	1254	296	104	108	37	100	100	0	4909	4543	1219	40	45	43	100	100	0	0.248	0.255	0.250	0.263	1.411	0.247	0.916	156	644	6075	5653	-2.013	1206	4869	1150	4503	0
3	3	7	"YHC1"	"YLR298C"	11470	15460	150	865	848	186	101	105	31	100	100	0	4570	4162	1191	41	44	30	100	100	0	0.169	0.181	0.179	0.189	1.424	0.170	0.901	156	594	5293	4868	-2.568	764	4529	747	4121	0
3	4	7	"THI7"	"YLR237W"	11660	15450	140	2510	2476	439	100	104	32	100	100	0	8271	7754	1806	40	41	27	100	100	0	0.293	0.308	0.303	0.321	1.365	0.297	0.941	156	601	10641	10090	-1.772	2410	8231	2376	7714	0
3	5	7	"YLR269C"	"YLR269C"	11870	15450	140	880	826	274	100	107	41	98	95	0	3246	2863	1032	39	41	23	99	99	0	0.243	0.257	0.254	0.262	1.528	0.249	0.923	156	610	3987	3550	-2.040	780	3207	726	2824	0
3	6	7	"EXG1"	"YLR300W"	12060	15450	140	1209	1165	338	100	107	39	100	98	0	5662	5149	1496	38	41	30	100	100	0	0.197	0.208	0.203	0.206	1.472	0.204	0.935	156	551	6733	6176	-2.342	1109	5624	1065	5111	0
3	7	7	"MVP1"	"YMR004W"	12270	15450	130	1510	1662	873	100	103	30	100	100	0	1061	1111	556	38	41	29	98	97	0	1.378	1.456	1.420	1.545	1.756	1.503	0.911	120	554	2433	2635	0.463	1410	1023	1562	1073	0
3	8	7	"IMP2"	"YMR035W"	12470	15450	120	1027	1064	436	101	105	34	100	100	0	1626	1611	743	39	42	24	100	99	0	0.583	0.613	0.597	0.640	1.487	0.591	0.907	120	480	2513	2535	-0.777	926	1587	963	1572	0
3	9	7	"SOV1"	"YMR066W"	12660	15450	140	720	740	265	101	105	33	100	99	0	1102	1046	410	37	39	19	100	99	0	0.581	0.633	0.613	0.642	1.520	0.619	0.892	156	588	1684	1648	-0.783	619	1065	639	1009	0
3	10	7	"PLB2"	"YMR006C"	12860	15450	130	3192	3758	2552	101	104	31	100	100	0	1329	1635	1132	37	38	19	99	96	0	2.392	2.288	2.227	2.495	1.695	2.366	0.893	120	525	4383	5255	1.258	3091	1292	3657	1598	0
3	11	7	"MSN2"	"YMR037C"	13050	15450	140	814	791	325	102	105	30	98	98	0	2414	2230	1088	38	40	20	98	97	0	0.300	0.314	0.309	0.340	1.799	0.297	0.898	156	579	3088	2881	-1.739	712	2376	689	2192	0
3	12	7	"YMR068W"	"YMR068W"	13270	15450	130	381	386	134	102	104	31	99	97	0	1465	1420	593	37	39	20	99	99	0	0.195	0.205	0.196	0.211	1.773	0.189	0.768	120	520	1707	1667	-2.356	279	1428	284	1383	0
3	13	7	"PLB1"	"YMR008C"	13440	15450	140	7690	7245	2181	101	105	38	100	100	0	8785	8053	3014	39	41	21	100	100	0	0.868	0.891	0.867	0.967	1.551	0.858	0.928	156	566	16335	15158	-0.205	7589	8746	7144	8014	0
3	14	7	"SUB1"	"YMR039C"	13660	15450	140	1427	1355	405	100	106	39	100	99	0	5760	5110	1842	40	43	33	100	100	0	0.232	0.248	0.244	0.262	1.429	0.234	0.936	156	716	7047	6325	-2.108	1327	5720	1255	5070	0
3	15	7	"MOT3"	"YMR070W"	13880	15450	140	2175	2008	627	101	105	32	100	100	0	4015	3706	1296	40	42	21	100	100	0	0.522	0.520	0.511	0.534	1.499	0.504	0.935	156	669	6049	5573	-0.939	2074	3975	1907	3666	0
3	16	7	"YMR010W"	"YMR010W"	14050	15450	130	3709	3566	706	102	107	43	100	100	0	4540	4269	1184	41	43	35	100	100	0	0.802	0.819	0.799	0.853	1.300	0.776	0.930	120	577	8106	7692	-0.319	3607	4499	3464	4228	0
3	17	7	"YMR041C"	"YMR041C"	14270	15440	130	2043	1951	471	100	105	41	100	100	0	4865	4398	1339	40	48	87	100	99	0	0.403	0.425	0.416	0.452	1.395	0.403	0.932	120	643	6768	6209	-1.312	1943	4825	1851	4358	0
3	18	7	"ABF2"	"YMR072W"	14490	15450	140	1249	1160	402	102	105	31	100	99	0	2259	2045	812	40	48	88	97	96	0	0.517	0.528	0.528	0.559	1.652	0.508	0.922	156	572	3366	3063	-0.952	1147	2219	1058	2005	0
3	19	7	"YNL046W"	"YNL046W"	14660	15450	140	1241	1162	434	102	106	31	98	98	0	4728	4103	1816	39	40	24	100	100	0	0.243	0.261	0.258	0.269	1.789	0.247	0.931	156	481	5828	5124	-2.042	1139	4689	1060	4064	0
3	20	7	"TPM1"	"YNL079C"	14860	15450	140	1642	1675	497	101	104	30	100	100	0	5902	5553	1467	39	40	22	100	100	0	0.263	0.285	0.272	0.282	1.380	0.278	0.910	156	479	7404	7088	-1.928	1541	5863	1574	5514	0
3	21	7	"CYB5"	"YNL111C"	15060	15450	140	1419	1409	476	100	103	30	99	98	0	2223	2097	856	38	39	19	100	98	0	0.604	0.636	0.618	0.682	1.534	0.602	0.915	156	648	3504	3368	-0.728	1319	2185	1309	2059	0
3	1	8	"ALG11"	"YNL048W"	11050	15650	140	5059	5508	2182	101	107	43	100	100	0	7014	6750	2434	38	39	19	100	99	0	0.711	0.806	0.768	0.832	1.430	0.810	0.930	156	713	11934	12119	-0.493	4958	6976	5407	6712	0
3	2	8	"YNL081C"	"YNL081C"	11260	15650	140	3473	3294	811	100	111	72	100	100	0	2698	2492	747	40	42	22	100	100	0	1.269	1.303	1.307	1.352	1.303	1.281	0.947	156	518	6031	5646	0.344	3373	2658	3194	2452	0
3	3	8	"RPC19"	"YNL113W"	11460	15650	140	398	394	108	101	109	64	98	91	0	2755	2529	834	40	43	30	100	99	0	0.109	0.118	0.113	0.119	1.580	0.109	0.792	156	561	3012	2782	-3.192	297	2715	293	2489	0
3	4	8	"YNL050C"	"YNL050C"	11680	15650	140	6178	5894	1167	101	104	34	100	100	0	3574	3267	911	39	43	52	99	98	0	1.719	1.795	1.731	1.907	1.462	1.755	0.943	156	609	9612	9021	0.782	6077	3535	5793	3228	0
3	5	8	"YNL083W"	"YNL083W"	11890	15660	140	2186	2152	1071	100	105	38	99	98	0	5932	5185	2697	40	43	52	98	96	0	0.354	0.399	0.385	0.448	1.635	0.381	0.906	156	541	7978	7197	-1.498	2086	5892	2052	5145	0
3	6	8	"YNL115C"	"YNL115C"	12090	15650	140	2964	2908	646	103	108	40	100	100	0	4882	4541	1342	40	47	72	100	100	0	0.591	0.623	0.586	0.655	1.463	0.597	0.917	156	567	7703	7306	-0.759	2861	4842	2805	4501	0
3	7	8	"COX5A"	"YNL052W"	12270	15650	140	1301	1219	371	104	105	31	100	99	0	2247	1998	738	40	43	35	99	99	0	0.542	0.569	0.556	0.599	1.543	0.549	0.920	156	607	3404	3073	-0.883	1197	2207	1115	1958	0
3	8	8	"MKT1"	"YNL085W"	12470	15630	130	2899	2787	949	102	106	30	100	100	0	5424	4910	1723	39	41	20	100	100	0	0.519	0.551	0.533	0.566	1.445	0.533	0.916	120	599	8182	7556	-0.945	2797	5385	2685	4871	0
3	9	8	"MLS1"	"YNL117W"	12680	15630	130	1272	1250	383	101	107	33	100	100	0	4319	3968	1195	37	40	20	100	100	0	0.273	0.292	0.288	0.299	1.509	0.282	0.916	120	613	5453	5080	-1.871	1171	4282	1149	3931	0
3	10	8	"YOL015W"	"YOL015W"	12900	15640	130	784	860	404	100	110	54	100	99	0	915	940	463	38	58	142	96	90	0	0.780	0.843	0.851	0.857	1.429	0.837	0.912	120	615	1561	1662	-0.359	684	877	760	902	0
3	11	8	"YOL047C"	"YOL047C"	13080	15640	140	745	710	215	113	139	126	96	90	0	3233	2850	1088	43	67	78	99	99	0	0.198	0.213	0.211	0.218	1.519	0.193	0.735	156	651	3822	3404	-2.336	632	3190	597	2807	0
3	12	8	"YOL079W"	"YOL079W"	13290	15630	120	212	235	110	111	140	134	35	6	0	386	394	184	42	59	62	95	90	0	0.294	0.352	0.309	0.301	2.125	0.520	0.336	120	514	445	476	-1.768	101	344	124	352	0
3	13	8	"YOL017W"	"YOL017W"	13490	15640	130	5246	5041	1193	102	112	61	100	100	0	5504	5204	1471	39	52	110	100	100	0	0.941	0.956	0.929	0.984	1.348	0.934	0.942	120	588	10609	10104	-0.087	5144	5465	4939	5165	0
3	14	8	"GSH2"	"YOL049W"	13670	15660	110	513	562	207	102	109	47	100	97	0	916	923	442	39	43	36	100	100	0	0.469	0.520	0.547	0.553	1.468	0.490	0.868	80	495	1288	1344	-1.093	411	877	460	884	0
3	15	8	"IRA2"	"YOL081W"	13890	15640	90	153	183	146	103	107	32	59	36	0	154	182	143	41	43	23	92	86	0	0.442	0.567	0.450	0.395	2.936	0.802	0.484	52	386	163	221	-1.176	50	113	80	141	0
3	16	8	"YOL019W"	"YOL019W"	14090	15650	130	6325	6095	1167	100	105	38	100	100	0	5309	4925	1266	41	45	58	100	100	0	1.182	1.227	1.184	1.267	1.272	1.205	0.943	120	607	11493	10879	0.241	6225	5268	5995	4884	0
3	17	8	"GAL11"	"YOL051W"	14280	15650	130	2258	2139	886	101	107	40	100	99	0	5989	5540	2537	41	50	76	99	99	0	0.363	0.371	0.368	0.386	1.525	0.352	0.925	120	595	8105	7537	-1.463	2157	5948	2038	5499	0
3	18	8	"YOL083W"	"YOL083W"	14480	15650	140	904	879	283	101	105	32	100	99	0	4101	3734	1395	42	50	87	99	98	0	0.198	0.211	0.208	0.223	1.589	0.199	0.903	156	613	4862	4470	-2.338	803	4059	778	3692	0
3	19	8	"DIS3"	"YOL021C"	14690	15630	140	2958	2898	860	101	105	33	100	99	0	7184	6588	2163	40	40	20	100	100	0	0.400	0.427	0.405	0.439	1.509	0.409	0.925	156	569	10001	9345	-1.322	2857	7144	2797	6548	0
3	20	8	"YOL053C-A"	"YOL053C-A"	14890	15620	130	541	552	152	99	104	35	100	100	0	1547	1499	461	39	51	168	99	98	0	0.293	0.310	0.291	0.318	1.538	0.287	0.828	120	506	1950	1913	-1.771	442	1508	453	1460	0
3	21	8	"YOL085C"	"YOL085C"	15080	15630	130	188	199	110	99	104	34	85	63	0	459	451	161	37	47	147	95	78	0	0.211	0.242	0.216	0.215	2.254	0.140	0.208	120	657	511	514	-2.245	89	422	100	414	0
3	1	9	"KIN4"	"YOR233W"	11100	15840	130	1046	1052	498	99	106	43	98	97	0	1128	1142	615	39	40	19	99	98	0	0.870	0.864	0.852	0.896	1.611	0.830	0.866	120	630	2036	2056	-0.202	947	1089	953	1103	0
3	2	9	"RBL2"	"YOR265W"	11280	15830	130	1125	1078	254	100	112	83	100	100	0	2798	2510	820	41	45	55	100	100	0	0.372	0.396	0.385	0.418	1.578	0.366	0.857	120	511	3782	3447	-1.427	1025	2757	978	2469	0
3	3	9	"TIM18"	"YOR297C"	11470	15840	130	1829	1830	414	100	110	73	100	100	0	3122	2912	852	38	44	60	100	100	0	0.561	0.602	0.582	0.628	1.447	0.571	0.908	120	577	4813	4604	-0.835	1729	3084	1730	2874	0
3	4	9	"SNR17A"	"YOR235W"	11680	15840	130	300	307	74	101	106	36	99	96	0	2426	2158	654	39	45	60	100	100	0	0.083	0.097	0.091	0.097	1.534	0.083	0.714	120	611	2586	2325	-3.584	199	2387	206	2119	0
3	5	9	"YOR267C"	"YOR267C"	11880	15840	140	2265	2766	1581	102	106	34	100	100	0	4541	5204	2997	39	43	50	100	99	0	0.480	0.516	0.485	0.553	1.843	0.501	0.882	156	626	6665	7829	-1.058	2163	4502	2664	5165	0
3	6	9	"BUD7"	"YOR299W"	12060	15840	110	419	408	163	105	109	39	92	86	0	1527	1402	810	41	54	101	86	81	0	0.211	0.223	0.233	0.261	1.902	0.201	0.815	80	459	1800	1664	-2.243	314	1486	303	1361	0
3	7	9	"HES1"	"YOR237W"	12290	15840	130	620	631	245	103	107	39	100	98	0	2261	2045	977	39	44	51	98	97	0	0.233	0.263	0.262	0.297	2.134	0.245	0.842	120	612	2739	2534	-2.104	517	2222	528	2006	0
3	8	9	"PAC1"	"YOR269W"	12490	15850	130	3769	3576	1206	101	107	38	100	100	0	4314	3877	1554	38	40	21	100	100	0	0.858	0.905	0.895	1.002	1.607	0.880	0.931	120	579	7944	7314	-0.221	3668	4276	3475	3839	0
3	9	9	"RAX1"	"YOR301W"	12680	15840	130	270	284	150	101	107	37	86	79	0	578	623	351	38	45	60	96	88	0	0.313	0.313	0.304	0.287	2.103	0.308	0.662	120	619	709	768	-1.676	169	540	183	585	0
3	10	9	"YOR239W"	"YOR239W"	12870	15870	90	1485	1392	486	104	163	208	100	98	0	5234	4500	1994	41	269	858	90	86	0	0.266	0.289	0.285	0.327	1.647	0.249	0.915	52	348	6574	5747	-1.911	1381	5193	1288	4459	0
3	11	9	"YOR271C"	"YOR271C"	13050	15850	110	267	301	113	111	158	180	43	7	0	1260	1355	668	43	212	714	81	41	0	0.128	0.145	0.135	0.141	1.914	0.175	0.722	80	512	1373	1502	-2.964	156	1217	190	1312	0
3	12	9	"CPA1"	"YOR303W"	13270	15840	130	826	780	317	111	138	102	95	90	0	3355	3071	1571	43	77	114	96	93	0	0.216	0.221	0.218	0.254	1.919	0.204	0.878	120	717	4027	3697	-2.212	715	3312	669	3028	0
3	13	9	"YPL222W"	"YPL222W"	13500	15840	110	1694	1633	400	107	119	69	100	100	0	4663	4166	1327	40	64	138	100	100	0	0.343	0.370	0.368	0.389	1.511	0.349	0.891	80	505	6210	5652	-1.543	1587	4623	1526	4126	0
3	14	9	"HFI1"	"YPL254W"	13680	15840	130	3062	3024	469	104	107	37	100	100	0	3906	3680	873	38	40	20	100	100	0	0.765	0.802	0.790	0.825	1.313	0.765	0.917	120	551	6826	6562	-0.387	2958	3868	2920	3642	0
3	15	9	"YPR003C"	"YPR003C"	13860	15840	120	5120	4915	1869	105	107	32	100	100	0	3183	3017	1253	40	41	21	100	100	0	1.596	1.616	1.546	1.631	1.530	1.620	0.908	120	573	8158	7787	0.674	5015	3143	4810	2977	0
3	16	9	"MMT2"	"YPL224C"	14080	15830	130	4582	4450	944	104	109	51	100	100	0	4657	4202	1222	41	45	54	100	100	0	0.970	1.044	1.002	1.085	1.438	1.010	0.912	120	644	9094	8507	-0.044	4478	4616	4346	4161	0
3	17	9	"CLN2"	"YPL256C"	14290	15850	130	3062	2919	853	101	106	53	100	100	0	4912	4423	1521	39	44	57	100	100	0	0.608	0.643	0.615	0.666	1.453	0.612	0.920	120	542	7834	7202	-0.719	2961	4873	2818	4384	0
3	18	9	"HAL1"	"YPR005C"	14460	15850	130	3564	3497	664	99	103	30	100	100	0	5160	4695	1281	41	41	20	100	100	0	0.677	0.730	0.678	0.763	1.373	0.689	0.917	120	503	8584	8052	-0.563	3465	5119	3398	4654	0
3	19	9	"YPL226W"	"YPL226W"	14670	15840	130	2598	2574	912	99	104	31	100	100	0	5351	4966	2000	39	40	19	100	100	0	0.470	0.502	0.492	0.523	1.455	0.482	0.924	120	609	7811	7402	-1.088	2499	5312	2475	4927	0
3	20	9	"THI21"	"YPL258C"	14890	15840	130	1774	1926	664	100	107	39	100	100	0	4759	4613	1385	40	49	144	100	100	0	0.355	0.399	0.375	0.401	1.434	0.390	0.884	120	695	6393	6399	-1.495	1674	4719	1826	4573	0
3	21	9	"SPO69"	"YPR007C"	15090	15850	130	4747	4759	1049	99	106	43	100	100	0	5830	5395	1626	38	47	140	100	100	0	0.802	0.870	0.831	0.917	1.401	0.835	0.924	120	679	10440	10017	-0.317	4648	5792	4660	5357	0
3	1	10	"CET1"	"YPL228W"	11080	16050	130	4971	5144	1833	100	103	32	100	100	0	7012	6880	2176	40	41	20	100	100	0	0.699	0.737	0.714	0.751	1.445	0.727	0.882	120	712	11843	11884	-0.517	4871	6972	5044	6840	0
3	2	10	"YPL260W"	"YPL260W"	11280	16040	130	3269	3165	732	101	107	53	100	100	0	5812	5337	1600	41	45	51	100	100	0	0.549	0.579	0.558	0.603	1.407	0.545	0.907	120	595	8939	8360	-0.865	3168	5771	3064	5296	0
3	3	10	"YPR009W"	"YPR009W"	11470	16040	130	4676	4627	748	103	106	34	100	100	0	2182	1960	598	39	43	39	100	100	0	2.134	2.355	2.266	2.508	1.431	2.310	0.915	120	660	6716	6445	1.094	4573	2143	4524	1921	0
3	4	10	"LTE1"	"YAL024C"	11700	16040	90	285	321	192	103	107	41	88	73	0	171	218	138	39	42	29	92	80	0	1.379	1.218	1.096	1.220	1.925	1.397	0.593	52	402	314	397	0.463	182	132	218	179	0
3	5	10	"PEP1"	"YBL017C"	11890	16050	80	139	154	81	104	108	33	51	28	0	81	99	81	39	41	21	61	48	0	0.833	0.833	0.813	0.969	3.294	2.758	0.171	52	299	77	110	-0.263	35	42	50	60	0
3	6	10	"ENA2"	"YDR039C"	12060	16040	150	122	142	70	107	116	67	25	8	0	57	89	84	40	53	75	21	14	0	0.882	0.714	0.861	0.876	3.408	0.418	0.228	156	711	32	84	-0.181	15	17	35	49	-50
3	7	10	"YFL019C"	"YFL019C"	12260	16040	150	113	138	92	101	104	34	31	13	0	50	76	104	38	44	61	16	8	0	1.000	0.974	1.333	1.237	3.056	0.925	0.445	156	673	24	75	0.000	12	12	37	38	-50
3	8	10	"YGL066W"	"YGL066W"	12460	16040	150	118	124	53	104	108	39	22	9	0	47	69	80	37	41	24	32	16	0	1.400	0.625	1.000	1.028	3.842	0.702	0.221	156	610	24	52	0.485	14	10	20	32	-50
3	9	10	"MNT2"	"YGL257C"	12660	16040	150	115	141	108	103	108	48	26	13	0	50	110	425	38	41	26	30	23	0	1.000	0.528	1.300	1.129	3.425	0.087	0.055	156	677	24	110	0.000	12	12	38	72	-50
3	10	10	"YHR032W"	"YHR032W"	12860	16040	150	112	125	72	101	127	147	3	0	0	47	60	50	39	134	603	0	0	0	1.375	1.143	1.141	1.012	3.574	1.408	0.255	156	672	19	45	0.459	11	8	24	21	-50
3	11	10	"YHR036W"	"YHR036W"	13060	16040	150	115	147	179	99	119	128	8	3	0	43	61	60	38	107	512	0	0	0	3.200	2.087	1.157	1.180	4.097	6.885	0.117	156	662	21	71	1.678	16	5	48	23	-50
3	12	10	"YHR045W"	"YHR045W"	13260	16040	150	110	118	49	99	103	36	25	10	0	44	64	79	37	40	31	18	13	0	1.571	0.704	1.167	0.938	3.866	0.692	0.215	156	680	18	46	0.652	11	7	19	27	-50
3	13	10	"STT4"	"YLR305C"	13460	16040	150	117	134	71	102	107	42	28	11	0	48	66	75	39	48	71	11	7	0	1.667	1.185	1.307	1.403	4.148	0.632	0.307	156	687	24	59	0.737	15	9	32	27	-50
3	14	10	"YLR422W"	"YLR422W"	13660	16040	150	110	120	54	101	106	34	27	13	0	45	61	57	39	47	138	5	0	0	1.500	0.864	1.487	1.487	3.551	1.455	0.147	156	655	15	41	0.585	9	6	19	22	-50
3	15	10	"YML072C"	"YML072C"	13870	16040	150	111	123	73	103	108	45	18	5	0	46	56	62	39	47	131	2	1	0	1.143	1.176	1.333	1.338	3.061	0.136	0.088	156	742	15	37	0.193	8	7	20	17	-50
3	16	10	"SNR54"	"SNR54"	14090	16040	120	402	408	133	101	106	48	98	94	0	730	700	237	40	43	32	99	99	0	0.436	0.465	0.451	0.462	1.667	0.451	0.809	120	537	991	967	-1.197	301	690	307	660	0
3	17	10	"YMR046W-A"	"YMR046W-A"	14280	16040	140	3565	3522	1583	99	103	43	99	98	0	5093	4713	2497	39	40	21	99	98	0	0.686	0.732	0.701	0.868	2.139	0.692	0.900	156	608	8520	8097	-0.544	3466	5054	3423	4674	0
3	18	10	"YMRWdelta16"	"YMRWdelta16"	14490	16030	140	238	249	86	100	105	35	92	83	0	1398	1233	543	37	38	17	98	98	0	0.101	0.125	0.121	0.125	1.834	0.115	0.657	156	625	1499	1345	-3.302	138	1361	149	1196	0
3	19	10	"YNRCdelta9"	"YNRCdelta9"	14690	16030	140	613	577	206	100	107	38	96	93	0	1366	1217	491	39	41	24	98	98	0	0.387	0.405	0.393	0.404	1.653	0.382	0.850	156	663	1840	1655	-1.371	513	1327	477	1178	0
3	20	10	"SNR50"	"SNR50"	14880	16040	110	285	291	75	99	105	36	98	95	0	817	761	264	41	47	57	100	98	0	0.240	0.267	0.270	0.269	1.752	0.221	0.668	80	443	962	912	-2.061	186	776	192	720	0
3	21	10	"tR(ACG)O"	"tR(ACG)O"	15080	16040	140	174	188	109	99	106	43	66	44	0	216	211	105	38	43	48	85	76	0	0.421	0.514	0.454	0.478	2.832	0.641	0.305	156	717	253	262	-1.247	75	178	89	173	0
3	1	11	"YPLCdelta1"	"YPLCdelta1"	11080	16250	130	904	920	269	99	102	29	100	100	0	1910	1769	567	38	40	19	100	100	0	0.430	0.474	0.465	0.490	1.411	0.459	0.895	120	657	2677	2552	-1.218	805	1872	821	1731	0
3	2	11	"YPL183W-A"	"YPL183W-A"	11290	16240	140	441	441	124	100	105	42	98	96	0	1204	1140	367	40	44	50	100	98	0	0.293	0.310	0.310	0.312	1.494	0.294	0.853	156	604	1505	1441	-1.771	341	1164	341	1100	0
3	3	11	"IntYPL143W"	"IntYPL143W"	11470	16240	130	947	967	228	100	104	40	100	100	0	2143	1992	587	39	42	49	100	100	0	0.403	0.444	0.442	0.463	1.412	0.418	0.894	120	574	2951	2820	-1.313	847	2104	867	1953	0
3	4	11	"tC(GCA)P2"	"tC(GCA)P2"	11680	16230	130	177	188	76	102	106	42	74	39	0	211	203	81	38	41	23	95	90	0	0.434	0.521	0.473	0.470	2.314	0.570	0.442	120	653	248	251	-1.206	75	173	86	165	0
3	5	11	"tN(GUU)P"	"tN(GUU)P"	11880	16240	130	7154	7213	2636	111	128	87	100	100	0	12989	12495	5003	45	59	61	100	100	0	0.544	0.570	0.566	0.597	1.343	0.546	0.927	120	649	19987	19552	-0.878	7043	12944	7102	12450	0
3	6	11	"tI(AAU)P2"	"tI(AAU)P2"	12090	16240	120	621	594	180	108	123	80	98	93	0	1316	1236	425	44	58	65	100	97	0	0.403	0.408	0.403	0.410	1.538	0.391	0.861	120	541	1785	1678	-1.310	513	1272	486	1192	0
3	7	11	"itL(UAA)B2"	"itL(UAA)B2"	12290	16240	130	334	322	102	102	104	32	95	93	0	998	899	346	39	41	22	98	97	0	0.242	0.256	0.256	0.263	1.646	0.237	0.746	120	573	1191	1080	-2.047	232	959	220	860	0
3	8	11	"iYBR057C"	"iYBR057C"	12490	16230	130	3311	3150	869	105	107	32	100	100	0	5921	5415	1699	39	41	20	100	100	0	0.545	0.566	0.558	0.585	1.338	0.548	0.930	120	612	9088	8421	-0.876	3206	5882	3045	5376	0
3	9	11	"iYBR060C-1"	"iYBR060C-1"	12700	16250	90	243	287	168	100	103	29	92	80	0	262	283	169	39	39	19	92	92	0	0.641	0.766	0.728	0.723	2.131	0.894	0.647	52	380	366	431	-0.641	143	223	187	244	0
3	10	11	"iYBR077C"	"iYBR077C"	12890	16240	130	471	476	146	100	107	55	100	97	0	1335	1260	396	38	39	19	100	100	0	0.286	0.308	0.300	0.306	1.531	0.296	0.807	120	579	1668	1598	-1.806	371	1297	376	1222	0
3	11	11	"iYBR081C"	"iYBR081C"	13080	16240	130	363	364	104	102	106	43	99	99	0	1316	1230	385	38	45	114	100	97	0	0.204	0.220	0.214	0.220	1.646	0.199	0.684	120	592	1539	1454	-2.292	261	1278	262	1192	0
3	12	11	"iYBR083W"	"iYBR083W"	13290	16240	120	938	923	292	102	102	32	100	100	0	2728	2449	879	37	45	117	99	97	0	0.311	0.340	0.334	0.351	1.509	0.322	0.908	120	555	3527	3233	-1.687	836	2691	821	2412	0
3	13	11	"iYBR097W"	"iYBR097W"	13490	16240	130	366	362	107	101	104	33	96	95	0	757	701	262	37	40	23	99	96	0	0.368	0.393	0.376	0.410	1.665	0.380	0.622	120	583	985	925	-1.442	265	720	261	664	0
3	14	11	"iYBR103W"	"iYBR103W"	13690	16240	120	896	882	266	100	105	34	100	100	0	2228	2087	629	39	47	153	99	99	0	0.364	0.382	0.375	0.381	1.414	0.373	0.913	120	531	2985	2830	-1.459	796	2189	782	2048	0
3	15	11	"iYBR107C"	"iYBR107C"	13890	16250	130	960	948	333	99	105	48	99	99	0	3235	2968	956	38	47	148	100	99	0	0.269	0.290	0.287	0.285	1.441	0.285	0.910	120	577	4058	3779	-1.893	861	3197	849	2930	0
3	16	11	"iYBR126C"	"iYBR126C"	14090	16240	140	698	672	207	100	105	46	99	98	0	1619	1469	582	40	42	30	98	98	0	0.379	0.400	0.390	0.437	1.812	0.374	0.879	156	631	2177	2001	-1.401	598	1579	572	1429	0
3	17	11	"iYBR130C"	"iYBR130C"	14280	16240	130	942	932	252	96	101	44	100	100	0	2526	2353	717	39	40	21	100	100	0	0.340	0.361	0.351	0.370	1.337	0.343	0.902	120	561	3333	3150	-1.556	846	2487	836	2314	0
3	18	11	"iYBR135W"	"iYBR135W"	14480	16250	130	1238	1261	465	97	103	46	100	100	0	3771	3555	1117	37	39	19	100	100	0	0.306	0.331	0.311	0.329	1.338	0.332	0.908	120	628	4875	4682	-1.710	1141	3734	1164	3518	0
3	19	11	"iYDL248W-0"	"iYDL248W-0"	14690	16240	130	702	739	317	101	106	37	100	100	0	1347	1510	694	37	40	23	100	100	0	0.459	0.433	0.422	0.428	1.498	0.413	0.843	120	626	1911	2111	-1.124	601	1310	638	1473	0
3	20	11	"iYDL246C-1"	"iYDL246C-1"	14900	16230	140	785	832	444	100	107	43	94	92	0	2479	2477	1454	39	45	52	96	94	0	0.281	0.300	0.289	0.307	1.765	0.289	0.901	156	654	3125	3170	-1.833	685	2440	732	2438	0
3	21	11	"iYDL243C"	"iYDL243C"	15100	16230	140	710	727	384	99	106	42	97	93	0	2239	2081	1037	37	39	26	99	98	0	0.277	0.307	0.297	0.301	1.652	0.305	0.857	156	708	2813	2672	-1.850	611	2202	628	2044	0
3	1	12	"iYDL227C-0"	"iYDL227C-0"	11090	16440	140	1054	1157	538	99	103	32	99	98	0	2585	2604	1190	38	40	23	100	100	0	0.375	0.412	0.389	0.409	1.507	0.405	0.907	156	719	3502	3624	-1.415	955	2547	1058	2566	0
3	2	12	"iYDL225W"	"iYDL225W"	11280	16440	140	3264	3345	1207	99	104	42	100	100	0	1877	1799	749	38	42	50	98	98	0	1.721	1.843	1.785	1.926	1.428	1.821	0.938	156	581	5004	5007	0.783	3165	1839	3246	1761	0
3	3	12	"iYDL220C"	"iYDL220C"	11470	16440	130	643	626	179	101	106	43	99	98	0	1573	1420	443	39	44	59	100	99	0	0.353	0.380	0.364	0.382	1.344	0.369	0.869	120	587	2076	1906	-1.501	542	1534	525	1381	0
3	4	12	"iYDL207W"	"iYDL207W"	11690	16440	140	494	482	144	101	108	42	98	96	0	1431	1279	531	39	42	35	99	97	0	0.282	0.307	0.289	0.323	1.551	0.278	0.825	156	701	1785	1621	-1.825	393	1392	381	1240	0
3	5	12	"iYDL203C"	"iYDL203C"	11880	16440	130	383	397	141	107	118	63	97	88	0	1617	1576	656	41	47	35	99	99	0	0.175	0.189	0.192	0.193	1.554	0.182	0.779	120	592	1852	1825	-2.514	276	1576	290	1535	0
3	6	12	"iYDL199C"	"iYDL199C"	12090	16430	130	256	258	69	106	111	46	93	80	0	1263	1185	401	41	45	30	99	98	0	0.123	0.133	0.140	0.133	1.671	0.125	0.683	120	629	1372	1296	-3.026	150	1222	152	1144	0
3	7	12	"iYDL183C-1"	"iYDL183C-1"	12300	16430	130	563	527	169	99	102	30	97	95	0	3148	2903	1200	40	42	23	98	97	0	0.149	0.149	0.151	0.167	1.760	0.144	0.877	120	614	3572	3291	-2.744	464	3108	428	2863	0
3	8	12	"iYDL179W"	"iYDL179W"	12490	16430	130	596	573	216	100	104	43	98	95	0	2342	2136	882	40	42	31	98	95	0	0.215	0.226	0.219	0.247	1.685	0.217	0.884	120	576	2798	2569	-2.214	496	2302	473	2096	0
3	9	12	"iYDL175C"	"iYDL175C"	12680	16440	140	1827	1747	735	101	105	42	99	98	0	2050	1973	974	38	40	28	99	98	0	0.858	0.851	0.831	0.919	1.636	0.819	0.928	156	723	3738	3581	-0.221	1726	2012	1646	1935	0
3	10	12	"iYDR127W"	"iYDR127W"	12890	16430	130	571	541	203	100	107	44	98	93	0	1776	1586	722	39	40	23	99	98	0	0.271	0.285	0.293	0.303	1.530	0.263	0.860	120	626	2208	1988	-1.883	471	1737	441	1547	0
3	11	12	"iYDR131C"	"iYDR131C"	13090	16440	130	520	532	182	103	108	43	98	95	0	1668	1530	586	38	45	112	94	91	0	0.256	0.288	0.289	0.314	1.772	0.276	0.874	120	615	2047	1921	-1.967	417	1630	429	1492	0
3	12	12	"iYDR137W"	"iYDR137W"	13290	16440	130	198	206	66	102	106	40	85	60	0	758	686	288	37	46	112	90	87	0	0.133	0.160	0.152	0.162	2.181	0.152	0.518	120	620	817	753	-2.909	96	721	104	649	0
3	13	12	"iYDR155C"	"iYDR155C"	13490	16440	130	268	261	74	104	107	39	94	86	0	1123	1022	399	37	39	25	95	94	0	0.151	0.159	0.158	0.164	1.878	0.146	0.684	120	558	1250	1142	-2.727	164	1086	157	985	0
3	14	12	"iYDR161W"	"iYDR161W"	13670	16440	140	1042	984	400	99	104	34	99	98	0	1098	1002	431	38	40	25	95	95	0	0.890	0.918	0.924	1.006	1.657	0.916	0.898	156	641	2003	1849	-0.169	943	1060	885	964	0
3	15	12	"iYDR165W"	"iYDR165W"	13880	16440	130	450	438	131	98	104	41	95	92	0	784	748	296	39	41	30	95	93	0	0.472	0.480	0.490	0.524	1.750	0.455	0.865	120	579	1097	1049	-1.082	352	745	340	709	0
3	16	12	"iYDR177W"	"iYDR177W"	14070	16440	130	722	767	301	99	104	37	98	97	0	2426	2471	1053	39	40	29	99	99	0	0.261	0.275	0.262	0.279	1.434	0.265	0.888	120	543	3010	3100	-1.938	623	2387	668	2432	0
3	17	12	"iYDR180W"	"iYDR180W"	14260	16440	130	2059	1940	676	98	101	31	100	100	0	1770	1626	571	38	39	18	100	99	0	1.132	1.160	1.176	1.215	1.411	1.161	0.950	120	625	3693	3430	0.179	1961	1732	1842	1588	0
3	18	12	"iYDR184C"	"iYDR184C"	14480	16440	130	913	945	605	97	102	34	98	95	0	2613	2485	1032	38	39	18	99	99	0	0.317	0.347	0.331	0.366	1.781	0.358	0.741	120	626	3391	3295	-1.658	816	2575	848	2447	0
3	19	12	"iYDR204W"	"iYDR204W"	14680	16440	130	388	385	125	100	104	31	100	95	0	1868	1689	634	38	38	17	100	100	0	0.157	0.173	0.175	0.178	1.583	0.163	0.833	120	597	2118	1936	-2.668	288	1830	285	1651	0
3	20	12	"iYDR208W"	"iYDR208W"	14880	16440	130	622	666	271	100	104	36	100	99	0	1710	1687	801	38	39	19	100	100	0	0.312	0.343	0.338	0.361	1.559	0.327	0.884	120	595	2194	2215	-1.679	522	1672	566	1649	0
3	21	12	"itI(UAU)D"	"itI(UAU)D"	15080	16440	140	480	497	226	98	102	35	98	95	0	1252	1182	584	37	39	19	99	99	0	0.314	0.348	0.331	0.349	1.692	0.338	0.854	156	748	1597	1544	-1.669	382	1215	399	1145	0
3	1	13	"iYDR521W"	"iYDR521W"	11080	16650	140	630	634	235	98	102	30	100	100	0	1971	1750	765	37	38	17	100	100	0	0.275	0.313	0.298	0.339	1.973	0.280	0.790	156	740	2466	2249	-1.862	532	1934	536	1713	0
3	2	13	"iYDR525W"	"iYDR525W"	11280	16640	130	185	212	156	97	100	32	83	63	0	646	547	285	39	39	19	95	95	0	0.145	0.226	0.181	0.200	2.358	0.215	0.319	120	574	695	623	-2.786	88	607	115	508	0
3	3	13	"iYDR528W"	"iYDR528W"	11480	16640	130	1092	1046	334	99	104	38	100	100	0	1786	1567	651	39	41	39	96	95	0	0.568	0.620	0.606	0.739	2.223	0.581	0.874	120	597	2740	2475	-0.815	993	1747	947	1528	0
3	4	13	"iYDR541C-0"	"iYDR541C-0"	11670	16640	120	790	771	394	99	104	35	98	91	0	1847	1845	1120	40	42	41	97	94	0	0.382	0.372	0.359	0.402	2.045	0.347	0.871	120	526	2498	2477	-1.387	691	1807	672	1805	0
3	5	13	"iYDR544C"	"iYDR544C"	11880	16640	130	15269	14277	6290	103	108	67	100	100	0	25370	21368	9572	40	48	117	100	99	0	0.599	0.665	0.622	0.735	1.709	0.642	0.895	120	611	40496	35502	-0.740	15166	25330	14174	21328	0
3	6	13	"iYEL073C-0"	"iYEL073C-0"	12080	16630	130	888	820	299	102	108	67	98	94	0	3655	3046	1401	40	48	115	96	94	0	0.217	0.239	0.239	0.280	1.962	0.225	0.885	120	632	4401	3724	-2.201	786	3615	718	3006	0
3	7	13	"iYEL063C"	"iYEL063C"	12280	16640	130	791	741	262	101	103	30	98	96	0	2935	2609	1178	39	41	22	100	98	0	0.238	0.249	0.245	0.277	1.918	0.227	0.873	120	628	3586	3210	-2.069	690	2896	640	2570	0
3	8	13	"iYEL059W"	"iYEL059W"	12490	16640	120	284	312	209	102	105	43	91	83	0	1682	1477	715	38	41	31	97	94	0	0.111	0.146	0.121	0.153	2.939	0.107	0.302	120	572	1826	1649	-3.175	182	1644	210	1439	0
3	9	13	"iYEL055C"	"iYEL055C"	12680	16650	130	2061	1934	611	102	107	45	100	100	0	2816	2531	1045	38	40	30	100	100	0	0.705	0.735	0.708	0.812	1.769	0.681	0.899	120	575	4737	4325	-0.504	1959	2778	1832	2493	0
3	10	13	"iYEL042W"	"iYEL042W"	12890	16650	130	1106	1053	395	100	104	33	100	100	0	4174	3641	1688	38	39	19	100	100	0	0.243	0.265	0.255	0.316	2.252	0.241	0.868	120	623	5142	4556	-2.040	1006	4136	953	3603	0
3	11	13	"iYEL038W"	"iYEL038W"	13080	16640	130	916	862	348	98	103	36	96	96	0	853	746	365	39	44	54	93	86	0	1.005	1.081	1.062	1.197	1.869	1.031	0.872	120	616	1632	1471	0.007	818	814	764	707	0
3	12	13	"itS(AGA)E"	"itS(AGA)E"	13290	16630	110	241	247	83	99	109	53	91	65	0	861	813	420	39	59	112	86	83	0	0.173	0.191	0.173	0.236	3.174	0.154	0.529	80	510	964	922	-2.533	142	822	148	774	0
3	13	13	"iYFL044C"	"iYFL044C"	13490	16640	130	346	352	142	98	105	46	93	87	0	922	827	412	38	45	55	94	89	0	0.281	0.322	0.306	0.331	2.178	0.287	0.720	120	596	1132	1043	-1.834	248	884	254	789	0
3	14	13	"iYFL039C"	"iYFL039C"	13680	16640	130	611	576	182	99	103	33	99	99	0	2710	2367	967	38	41	24	100	100	0	0.192	0.205	0.202	0.239	2.028	0.190	0.849	120	578	3184	2806	-2.384	512	2672	477	2329	0
3	15	13	"iYFL035C-A"	"iYFL035C-A"	13880	16640	130	1080	1063	370	100	104	38	100	98	0	1702	1504	625	39	41	29	96	92	0	0.589	0.657	0.627	0.733	1.976	0.619	0.883	120	574	2643	2428	-0.763	980	1663	963	1465	0
3	16	13	"iYFL020C"	"iYFL020C"	14090	16640	140	4227	3887	1475	101	104	36	100	100	0	4454	3913	1705	39	39	27	100	99	0	0.935	0.977	0.959	1.068	1.749	0.957	0.913	156	652	8541	7660	-0.098	4126	4415	3786	3874	0
3	17	13	"iYFL017C"	"iYFL017C"	14280	16650	130	913	904	276	99	102	32	100	100	0	1702	1565	542	38	39	18	100	100	0	0.489	0.527	0.506	0.546	1.611	0.502	0.873	120	579	2478	2332	-1.032	814	1664	805	1527	0
3	18	13	"iYFL013W-A"	"iYFL013W-A"	14480	16640	130	1483	1457	494	99	104	36	100	100	0	2880	2608	937	38	40	19	99	99	0	0.487	0.528	0.520	0.560	1.894	0.520	0.865	120	614	4226	3928	-1.038	1384	2842	1358	2570	0
3	19	13	"iYFR001W"	"iYFR001W"	14680	16630	130	4019	3614	1295	100	105	42	100	100	0	1950	1697	710	38	39	18	99	99	0	2.050	2.118	2.054	2.230	1.515	2.142	0.907	120	643	5831	5173	1.035	3919	1912	3514	1659	0
3	20	13	"iYFR005C"	"iYFR005C"	14890	16640	130	2337	2352	927	101	106	43	100	100	0	2063	1896	711	37	38	17	100	100	0	1.104	1.211	1.140	1.271	1.688	1.237	0.889	120	609	4262	4110	0.142	2236	2026	2251	1859	0
3	21	13	"iYFR007W"	"iYFR007W"	15080	16640	140	876	819	352	99	104	34	96	94	0	1146	985	530	38	40	20	95	92	0	0.701	0.760	0.776	0.886	2.255	0.610	0.692	156	732	1885	1667	-0.512	777	1108	720	947	0
3	1	14	"iYFR019W"	"iYFR019W"	11090	16840	140	856	878	334	98	101	30	100	99	0	1122	1044	427	38	39	20	98	98	0	0.699	0.775	0.780	0.827	1.598	0.764	0.893	156	676	1842	1786	-0.516	758	1084	780	1006	0
3	2	14	"iYFR021W"	"iYFR021W"	11280	16850	140	1402	1329	426	96	99	31	100	100	0	3083	2599	1144	39	41	22	99	99	0	0.429	0.482	0.461	0.565	1.933	0.443	0.904	156	558	4350	3793	-1.221	1306	3044	1233	2560	0
3	3	14	"iYFR025C"	"iYFR025C"	11480	16840	130	283	293	92	98	102	35	96	94	0	519	489	198	39	39	18	95	94	0	0.385	0.433	0.434	0.451	1.825	0.396	0.721	120	540	665	645	-1.376	185	480	195	450	0
3	4	14	"iYGL013C"	"iYGL013C"	11680	16840	140	1816	1634	658	98	102	33	100	99	0	3057	2659	1310	38	38	17	99	98	0	0.569	0.586	0.575	0.681	2.013	0.554	0.932	156	636	4737	4157	-0.813	1718	3019	1536	2621	0
3	5	14	"iYGL009C"	"iYGL009C"	11880	16840	140	1575	1537	694	101	107	65	99	98	0	3657	3241	1677	38	46	110	95	92	0	0.407	0.448	0.435	0.514	1.983	0.424	0.903	156	676	5093	4639	-1.296	1474	3619	1436	3203	0
3	6	14	"iYGL006W"	"iYGL006W"	12100	16840	130	3143	2748	1120	101	107	68	98	98	0	1123	993	441	38	46	117	89	87	0	2.804	2.772	2.828	3.049	1.684	2.788	0.924	120	605	4127	3602	1.487	3042	1085	2647	955	0
3	7	14	"iYGR011W"	"iYGR011W"	12280	16840	140	1448	1328	556	101	103	32	98	98	0	2760	2305	1201	38	39	21	96	95	0	0.495	0.541	0.528	0.629	2.147	0.505	0.905	156	610	4069	3494	-1.015	1347	2722	1227	2267	0
3	8	14	"iYGR015C"	"iYGR015C"	12470	16840	130	1695	1609	601	101	103	31	100	98	0	2022	1716	788	38	39	17	98	97	0	0.803	0.899	0.859	1.025	2.086	0.850	0.910	120	567	3578	3186	-0.316	1594	1984	1508	1678	0
3	9	14	"iYGR020C"	"iYGR020C"	12680	16840	140	2290	2123	951	100	102	31	99	98	0	3448	2819	1397	39	39	17	98	96	0	0.642	0.728	0.697	0.811	1.830	0.702	0.918	156	699	5599	4803	-0.638	2190	3409	2023	2780	0
3	10	14	"iYGR034W"	"iYGR034W"	12890	16840	130	4305	4076	1670	99	103	35	100	100	0	2199	1948	812	38	38	17	99	99	0	1.946	2.082	2.049	2.172	1.567	2.116	0.929	120	559	6367	5887	0.961	4206	2161	3977	1910	0
3	11	14	"iYGR038W"	"iYGR038W"	13080	16840	140	2433	2032	956	101	104	36	98	98	0	2569	2075	1121	38	39	23	97	96	0	0.921	0.948	0.938	1.057	1.947	0.918	0.932	156	662	4863	3968	-0.118	2332	2531	1931	2037	0
3	12	14	"iYGR039W"	"iYGR039W"	13290	16840	140	653	632	279	99	106	46	96	92	0	1793	1553	738	39	54	98	96	92	0	0.316	0.352	0.349	0.367	1.683	0.340	0.865	156	677	2308	2047	-1.663	554	1754	533	1514	0
3	13	14	"iYGR055W"	"iYGR055W"	13490	16840	140	563	522	212	99	105	44	94	90	0	2257	1892	984	38	40	22	98	96	0	0.209	0.228	0.222	0.252	2.006	0.209	0.851	156	583	2683	2277	-2.258	464	2219	423	1854	0
3	14	14	"iYGR059W"	"iYGR059W"	13680	16840	130	482	461	165	99	103	32	97	95	0	1378	1292	508	38	39	20	99	98	0	0.286	0.289	0.276	0.294	1.762	0.274	0.839	120	536	1723	1616	-1.807	383	1340	362	1254	0
3	15	14	"iYGR062C"	"iYGR062C"	13880	16830	140	264	263	93	98	103	35	89	83	0	1507	1421	739	38	40	32	98	96	0	0.113	0.119	0.116	0.124	1.926	0.108	0.721	156	635	1635	1548	-3.146	166	1469	165	1383	0
3	16	14	"iYHR001W"	"iYHR001W"	14090	16840	130	2697	2485	802	102	105	38	100	100	0	2055	1837	724	39	41	34	98	95	0	1.287	1.325	1.303	1.478	1.722	1.306	0.928	120	562	4611	4181	0.364	2595	2016	2383	1798	0
3	17	14	"iYHR004C"	"iYHR004C"	14290	16840	130	1699	1615	493	99	102	31	100	100	0	1661	1472	629	39	39	18	97	97	0	0.986	1.058	1.011	1.202	1.915	0.995	0.891	120	579	3222	2949	-0.020	1600	1622	1516	1433	0
3	18	14	"iYHRCdelta4"	"iYHRCdelta4"	14480	16840	130	2610	2455	860	99	125	453	95	90	0	3737	3277	1398	38	53	290	93	90	0	0.679	0.727	0.711	0.823	1.679	0.723	0.778	120	578	6210	5595	-0.559	2511	3699	2356	3239	0
3	19	14	"iYHR017W"	"iYHR017W"	14690	16850	130	859	836	280	100	126	448	85	25	0	1105	999	417	38	52	287	88	80	0	0.711	0.766	0.736	0.817	1.667	0.720	0.853	120	593	1826	1697	-0.491	759	1067	736	961	0
3	20	14	"iYHRCsigma2"	"iYHRCsigma2"	14890	16850	130	1119	1163	412	102	105	33	100	100	0	1842	1753	673	38	39	18	100	100	0	0.564	0.619	0.580	0.660	1.553	0.603	0.896	120	552	2821	2776	-0.827	1017	1804	1061	1715	0
3	21	14	"iYHR023W"	"iYHR023W"	15090	16840	140	2083	1917	723	99	104	32	100	100	0	1656	1432	660	38	39	18	98	97	0	1.226	1.304	1.284	1.450	1.803	1.269	0.922	156	716	3602	3212	0.294	1984	1618	1818	1394	0
3	1	15	"iYHR039C"	"iYHR039C"	11090	17040	140	473	479	190	98	101	30	98	96	0	841	797	350	38	40	22	97	96	0	0.467	0.502	0.484	0.511	1.805	0.467	0.807	156	703	1178	1140	-1.099	375	803	381	759	0
3	2	15	"iYHR042W"	"iYHR042W"	11290	17040	140	1225	1119	411	99	103	48	99	98	0	1628	1446	630	38	40	22	98	96	0	0.708	0.724	0.724	0.792	1.732	0.694	0.890	156	540	2716	2428	-0.498	1126	1590	1020	1408	0
3	3	15	"iYHR046C"	"iYHR046C"	11480	17030	150	1936	1790	749	98	104	47	100	98	0	1941	1639	798	38	39	18	99	98	0	0.966	1.057	1.027	1.223	1.999	1.020	0.890	156	583	3741	3293	-0.050	1838	1903	1692	1601	0
3	4	15	"iYHR060W"	"iYHR060W"	11680	17040	130	886	876	306	97	103	33	99	99	0	2131	1890	767	38	38	17	100	99	0	0.377	0.421	0.427	0.456	1.640	0.399	0.908	120	570	2882	2631	-1.407	789	2093	779	1852	0
3	5	15	"iYHR064C"	"iYHR064C"	11890	17030	130	495	502	181	98	104	39	98	98	0	2474	2244	1025	38	39	23	100	99	0	0.163	0.183	0.175	0.201	1.794	0.167	0.840	120	610	2833	2610	-2.617	397	2436	404	2206	0
3	6	15	"iYHR068W"	"iYHR068W"	12090	17050	130	961	909	312	99	103	32	100	100	0	1309	1156	505	38	39	24	99	98	0	0.678	0.725	0.731	0.810	1.651	0.694	0.902	120	598	2133	1928	-0.560	862	1271	810	1118	0
3	7	15	"iYIL023C"	"iYIL023C"	12300	17040	140	463	433	173	98	101	31	94	90	0	1938	1629	825	37	38	20	98	96	0	0.192	0.210	0.213	0.239	2.029	0.194	0.836	156	600	2266	1927	-2.381	365	1901	335	1592	0
3	8	15	"iYIL019W"	"iYIL019W"	12480	17040	130	1424	1306	408	101	103	29	100	100	0	3600	3035	1319	37	39	18	100	99	0	0.371	0.402	0.396	0.475	1.908	0.370	0.919	120	557	4886	4203	-1.429	1323	3563	1205	2998	0
3	9	15	"iYIL015W"	"iYIL015W"	12690	17050	120	150	166	74	100	103	38	62	32	0	160	153	77	39	40	22	88	82	0	0.413	0.579	0.544	0.535	2.655	0.682	0.291	120	527	171	180	-1.275	50	121	66	114	0
3	10	15	"iYIL005W"	"iYIL005W"	12880	17040	130	1330	1172	449	98	104	42	99	98	0	837	723	342	38	38	19	98	96	0	1.542	1.568	1.555	1.726	1.764	1.541	0.891	120	565	2031	1759	0.625	1232	799	1074	685	0
3	11	15	"iYIL001W"	"iYIL001W"	13090	17050	130	526	504	185	101	105	37	98	94	0	333	302	126	37	38	20	97	92	0	1.436	1.521	1.556	1.590	1.688	1.533	0.838	120	499	721	668	0.522	425	296	403	265	0
3	12	15	"iYIR003W"	"iYIR003W"	13290	17040	130	1279	1222	390	101	104	32	100	100	0	1074	981	408	37	39	21	99	98	0	1.136	1.188	1.210	1.282	1.568	1.143	0.901	120	487	2215	2065	0.184	1178	1037	1121	944	0
3	13	15	"iYIR018W-0"	"iYIR018W-0"	13490	17030	150	5662	5015	2136	102	105	30	99	99	0	3833	3178	1615	38	40	21	99	99	0	1.465	1.565	1.507	1.793	1.808	1.516	0.913	156	497	9355	8053	0.551	5560	3795	4913	3140	0
3	14	15	"iYIR020C"	"iYIR020C"	13690	17040	140	723	676	310	99	103	31	96	94	0	1213	1070	596	37	39	19	95	93	0	0.531	0.559	0.549	0.602	1.689	0.528	0.882	156	461	1800	1610	-0.914	624	1176	577	1033	0
3	15	15	"iYIR022W"	"iYIR022W"	13890	17030	140	717	671	292	98	104	40	97	92	0	2151	1831	955	38	41	35	96	92	0	0.293	0.320	0.325	0.366	1.924	0.297	0.878	156	546	2732	2366	-1.771	619	2113	573	1793	0
3	16	15	"iYIR038C-0"	"iYIR038C-0"	14100	17020	130	1817	1636	690	101	109	62	99	97	0	3763	3224	1644	39	45	76	100	96	0	0.461	0.482	0.463	0.532	1.532	0.449	0.920	120	543	5440	4720	-1.118	1716	3724	1535	3185	0
3	17	15	"iYIRCdelta6-2"	"iYIRCdelta6-2"	14300	17040	130	2338	2048	767	98	104	57	100	100	0	4837	4018	1950	39	55	207	95	90	0	0.467	0.490	0.467	0.570	1.744	0.446	0.909	120	511	7038	5929	-1.099	2240	4798	1950	3979	0
3	18	15	"iYIR042C"	"iYIR042C"	14500	17030	140	3119	2819	1271	97	127	495	91	83	0	4304	3724	1883	39	56	317	92	88	0	0.709	0.739	0.730	0.817	1.841	0.726	0.820	156	485	7287	6407	-0.497	3022	4265	2722	3685	0
3	19	15	"iYJR076C"	"iYJR076C"	14690	17030	140	861	853	324	100	128	493	83	19	0	1861	1656	752	39	55	316	91	83	0	0.418	0.466	0.458	0.521	1.736	0.438	0.877	156	488	2583	2370	-1.260	761	1822	753	1617	0
3	20	15	"iYJR083C"	"iYJR083C"	14900	17030	140	434	446	212	100	102	29	98	95	0	1630	1477	720	38	38	17	99	98	0	0.210	0.240	0.224	0.259	1.990	0.224	0.740	156	509	1926	1785	-2.253	334	1592	346	1439	0
3	21	15	"iYJR089W"	"iYJR089W"	15100	17040	140	2104	2062	924	100	103	30	100	99	0	1974	1743	877	37	38	19	98	96	0	1.035	1.150	1.126	1.281	1.788	1.127	0.917	156	652	3941	3668	0.049	2004	1937	1962	1706	0
3	1	16	"iYJR102C"	"iYJR102C"	11080	17240	140	1276	1292	485	99	101	28	100	100	0	3480	3129	1253	37	39	19	100	100	0	0.342	0.386	0.375	0.402	1.607	0.373	0.914	156	717	4620	4285	-1.549	1177	3443	1193	3092	0
3	2	16	"iYJR106W"	"iYJR106W"	11290	17240	130	1223	1114	458	97	102	47	100	100	0	1866	1596	750	39	39	17	100	100	0	0.616	0.653	0.662	0.705	1.563	0.627	0.901	120	540	2953	2574	-0.698	1126	1827	1017	1557	0
3	3	16	"iYJR110W"	"iYJR110W"	11490	17230	140	448	429	155	99	107	50	92	88	0	1000	855	381	39	40	20	97	96	0	0.363	0.404	0.396	0.448	2.091	0.378	0.811	156	567	1310	1146	-1.461	349	961	330	816	0
3	4	16	"iYJR128W"	"iYJR128W"	11690	17240	140	303	303	110	98	104	43	91	85	0	1464	1301	617	39	41	22	96	94	0	0.144	0.162	0.159	0.178	1.995	0.148	0.741	156	602	1630	1467	-2.797	205	1425	205	1262	0
3	5	16	"iYJR132W"	"iYJR132W"	11890	17240	130	1267	1165	453	98	102	40	98	95	0	2009	1775	781	39	42	26	96	95	0	0.593	0.615	0.616	0.712	1.840	0.601	0.921	120	559	3139	2803	-0.753	1169	1970	1067	1736	0
3	6	16	"iYJR136C"	"iYJR136C"	12080	17230	130	211	220	72	98	101	30	90	80	0	594	524	248	38	41	32	95	92	0	0.203	0.251	0.235	0.263	2.339	0.203	0.554	120	550	669	608	-2.299	113	556	122	486	0
3	7	16	"iYJR151C-1"	"iYJR151C-1"	12280	17240	130	516	496	183	96	100	30	96	93	0	2976	2628	1076	39	84	1011	85	78	0	0.143	0.154	0.149	0.154	1.597	0.090	0.534	120	542	3357	2989	-2.806	420	2937	400	2589	0
3	8	16	"iYJR153W-1"	"iYJR153W-1"	12480	17240	140	857	773	272	101	104	32	98	96	0	3595	3005	1350	38	81	979	85	76	0	0.213	0.226	0.224	0.246	1.758	0.151	0.640	156	579	4313	3639	-2.234	756	3557	672	2967	0
3	9	16	"iYJR157W-0"	"iYJR157W-0"	12680	17230	130	5304	4781	1917	102	111	85	99	97	0	6216	5154	2421	38	43	40	97	97	0	0.842	0.915	0.897	1.034	1.694	0.869	0.927	120	591	11380	9795	-0.248	5202	6178	4679	5116	0
3	10	16	"iYKR051W"	"iYKR051W"	12910	17220	150	2465	2195	995	100	108	82	98	95	0	1075	910	485	38	44	56	92	89	0	2.281	2.403	2.349	2.582	1.457	1.893	0.389	156	646	3402	2967	1.189	2365	1037	2095	872	0
3	11	16	"iYKR055W"	"iYKR055W"	13100	17210	140	443	406	165	101	104	35	92	87	0	1733	1427	770	37	41	49	91	89	0	0.202	0.219	0.218	0.270	2.232	0.205	0.832	156	573	2038	1695	-2.310	342	1696	305	1390	0
3	12	16	"iYKR059W"	"iYKR059W"	13290	17210	140	401	380	160	101	102	29	94	92	0	1152	993	485	36	37	16	97	94	0	0.269	0.292	0.285	0.332	2.365	0.271	0.748	156	605	1416	1236	-1.895	300	1116	279	957	0
3	13	16	"itK(UUU)K"	"itK(UUU)K"	13510	17210	140	239	240	84	99	105	88	71	28	0	673	595	287	36	42	81	91	83	0	0.220	0.252	0.244	0.280	2.406	0.283	0.478	156	550	777	700	-2.186	140	637	141	559	0
3	14	16	"iYKR076W"	"iYKR076W"	13690	17210	140	363	361	148	99	102	30	96	92	0	1768	1552	714	36	37	16	97	95	0	0.152	0.173	0.166	0.190	2.135	0.162	0.768	156	511	1996	1778	-2.714	264	1732	262	1516	0
3	15	16	"iYKR080W"	"iYKR080W"	13890	17210	140	377	359	118	101	106	36	94	87	0	827	720	319	37	40	20	96	94	0	0.349	0.378	0.375	0.388	1.770	0.356	0.822	156	614	1066	941	-1.517	276	790	258	683	0
3	16	16	"iYKR095W"	"iYKR095W"	14100	17210	140	1780	1654	645	101	108	56	99	97	0	4350	3799	1727	38	51	179	93	90	0	0.389	0.413	0.415	0.478	1.797	0.394	0.936	156	686	5991	5314	-1.361	1679	4312	1553	3761	0
3	17	16	"iYKR099W"	"iYKR099W"	14310	17210	150	2470	2212	952	98	104	54	99	96	0	2954	2498	1236	38	51	182	94	90	0	0.813	0.859	0.862	0.931	1.523	0.834	0.903	156	657	5288	4574	-0.298	2372	2916	2114	2460	0
3	18	16	"iYKR101W-2"	"iYKR101W-2"	14500	17220	140	1212	1133	419	98	105	42	97	96	0	3898	3440	1451	38	40	19	99	99	0	0.289	0.304	0.299	0.317	1.487	0.290	0.912	156	530	4974	4437	-1.793	1114	3860	1035	3402	0
3	19	16	"iYLL062C"	"iYLL062C"	14680	17210	140	622	594	231	98	104	39	96	94	0	2199	1915	893	37	39	19	96	95	0	0.242	0.264	0.265	0.306	1.975	0.246	0.861	156	573	2686	2374	-2.045	524	2162	496	1878	0
3	20	16	"iYLL058W"	"iYLL058W"	14890	17220	150	1107	1071	399	98	103	34	98	96	0	1640	1486	635	37	38	18	99	98	0	0.629	0.671	0.669	0.705	1.647	0.660	0.899	156	649	2612	2422	-0.668	1009	1603	973	1449	0
3	21	16	"iYLL055W"	"iYLL055W"	15080	17220	140	4091	3858	1351	100	104	31	100	100	0	2975	2652	1131	37	38	18	98	98	0	1.358	1.437	1.416	1.557	1.468	1.411	0.933	156	713	6929	6373	0.442	3991	2938	3758	2615	0
3	1	17	"iYLRWdelta14"	"iYLRWdelta14"	11090	17430	150	1284	1323	555	101	106	63	100	98	0	1288	1218	555	38	38	16	98	98	0	0.946	1.036	1.004	1.097	1.608	1.011	0.875	156	784	2433	2402	-0.079	1183	1250	1222	1180	0
3	2	17	"iYLR259C"	"iYLR259C"	11270	17420	130	1379	1304	470	98	102	31	99	99	0	3618	3263	1296	38	38	18	100	99	0	0.358	0.374	0.363	0.400	1.547	0.356	0.874	120	560	4861	4431	-1.483	1281	3580	1206	3225	0
3	3	17	"iYLR263W"	"iYLR263W"	11480	17430	140	500	504	202	100	105	34	96	95	0	1486	1364	642	39	40	22	96	95	0	0.276	0.305	0.294	0.334	2.090	0.283	0.821	156	675	1847	1729	-1.855	400	1447	404	1325	0
3	4	17	"iYLR281C"	"iYLR281C"	11680	17430	140	389	382	147	100	104	36	94	91	0	781	729	356	39	41	23	96	96	0	0.389	0.409	0.389	0.418	1.757	0.378	0.776	156	612	1031	972	-1.360	289	742	282	690	0
3	5	17	"iYLR286C"	"iYLR286C"	11890	17440	150	1380	1415	599	98	101	30	100	98	0	4086	3540	1749	37	39	21	100	98	0	0.317	0.376	0.365	0.434	1.844	0.350	0.888	156	634	5331	4820	-1.659	1282	4049	1317	3503	0
3	6	17	"iYLR289W"	"iYLR289W"	12060	17430	150	823	770	305	97	101	35	99	98	0	1208	1043	514	38	39	25	95	93	0	0.621	0.670	0.664	0.780	1.847	0.629	0.901	156	685	1896	1678	-0.688	726	1170	673	1005	0
3	7	17	"iYLR304C"	"iYLR304C"	12290	17430	140	645	649	275	100	104	37	94	93	0	1676	1578	856	39	74	904	75	43	0	0.333	0.357	0.371	0.408	1.873	0.332	0.893	156	679	2182	2088	-1.587	545	1637	549	1539	0
3	8	17	"iYLR308W"	"iYLR308W"	12490	17430	140	653	635	273	100	104	36	96	92	0	1100	961	512	38	80	960	58	0	0	0.521	0.580	0.563	0.624	1.574	0.544	0.847	156	602	1615	1458	-0.941	553	1062	535	923	0
3	9	17	"iYLR312W-A"	"iYLR312W-A"	12680	17440	140	1246	1152	430	101	107	78	98	94	0	2098	1856	857	38	42	37	97	96	0	0.556	0.578	0.583	0.638	1.756	0.544	0.892	156	655	3205	2869	-0.847	1145	2060	1051	1818	0
3	10	17	"iYLR330W"	"iYLR330W"	12890	17430	140	780	722	256	101	105	38	96	94	0	2765	2452	1073	37	42	51	94	93	0	0.249	0.257	0.257	0.281	1.786	0.239	0.877	156	648	3407	3036	-2.006	679	2728	621	2415	0
3	11	17	"iSNR61"	"iSNR61"	13070	17460	140	380	381	139	100	104	36	94	91	0	712	601	308	38	45	74	86	82	0	0.415	0.499	0.526	0.573	2.178	0.443	0.775	156	669	954	844	-1.267	280	674	281	563	0
3	12	17	"iYLRWdelta20"	"iYLRWdelta20"	13280	17440	120	272	290	123	104	106	38	92	88	0	656	589	255	38	42	47	95	90	0	0.272	0.338	0.323	0.356	2.154	0.334	0.684	120	599	786	737	-1.879	168	618	186	551	0
3	13	17	"iYMR033W"	"iYMR033W"	13490	17440	140	1319	1197	488	101	108	83	94	91	0	1051	932	422	38	43	74	93	91	0	1.202	1.226	1.238	1.313	1.914	1.239	0.893	156	687	2231	1990	0.266	1218	1013	1096	894	0
3	14	17	"iYMR037C"	"iYMR037C"	13680	17440	140	800	779	308	100	106	83	98	96	0	2481	2352	1140	37	42	75	97	96	0	0.286	0.293	0.289	0.331	1.893	0.274	0.867	156	633	3144	2994	-1.804	700	2444	679	2315	0
3	15	17	"iYMR041C"	"iYMR041C"	13860	17450	140	381	380	123	100	103	34	98	94	0	1136	1060	433	36	38	18	99	98	0	0.255	0.273	0.260	0.281	1.726	0.251	0.786	156	663	1381	1304	-1.969	281	1100	280	1024	0
3	16	17	"iYMR054W"	"iYMR054W"	14070	17450	130	1228	1177	353	97	102	32	100	100	0	1476	1373	469	36	39	20	100	99	0	0.785	0.808	0.798	0.843	1.469	0.784	0.900	120	654	2571	2417	-0.348	1131	1440	1080	1337	0
3	17	17	"iYMR058W"	"iYMR058W"	14280	17460	140	435	438	143	96	100	33	98	96	0	1560	1377	610	37	38	18	97	97	0	0.223	0.255	0.250	0.287	2.027	0.224	0.793	156	715	1862	1682	-2.168	339	1523	342	1340	0
3	18	17	"iYMR063W"	"iYMR063W"	14490	17450	150	285	278	86	97	104	41	92	83	0	817	712	324	38	40	19	97	94	0	0.241	0.269	0.277	0.303	2.021	0.244	0.715	156	642	967	855	-2.051	188	779	181	674	0
3	19	17	"iYMR078C"	"iYMR078C"	14660	17460	150	864	832	322	97	104	40	99	97	0	2210	1980	966	37	49	208	91	88	0	0.353	0.378	0.369	0.443	1.839	0.348	0.905	156	667	2940	2678	-1.502	767	2173	735	1943	0
3	20	17	"iYMR082C-0"	"iYMR082C-0"	14880	17460	140	575	580	234	97	103	32	100	99	0	2233	2189	918	37	48	204	98	93	0	0.218	0.224	0.213	0.228	1.678	0.207	0.804	156	691	2674	2635	-2.200	478	2196	483	2152	0
3	21	17	"iYMR085W"	"iYMR085W"	15080	17460	150	220	230	90	98	101	31	92	80	0	445	455	217	37	40	51	92	91	0	0.299	0.316	0.296	0.312	2.148	0.291	0.591	156	873	530	550	-1.742	122	408	132	418	0
3	1	18	"iYMR101C"	"iYMR101C"	11090	17650	150	3644	3455	1616	100	107	65	100	99	0	2364	2087	1038	38	39	18	100	99	0	1.524	1.637	1.584	1.726	1.660	1.645	0.907	156	784	5870	5404	0.608	3544	2326	3355	2049	0
3	2	18	"iYMR105C"	"iYMR105C"	11260	17660	140	1360	1470	746	102	108	74	97	95	0	1654	1716	1010	38	39	19	98	95	0	0.778	0.815	0.786	0.942	2.101	0.777	0.855	156	584	2874	3046	-0.361	1258	1616	1368	1678	0
3	3	18	"iYMR107W"	"iYMR107W"	11440	17660	130	445	436	135	102	107	44	99	96	0	1508	1420	546	38	40	29	99	98	0	0.233	0.242	0.237	0.252	1.810	0.223	0.788	120	580	1813	1716	-2.100	343	1470	334	1382	0
3	4	18	"iYNL272C"	"iYNL272C"	11660	17650	140	892	840	294	100	104	41	99	98	0	2115	1818	854	38	40	27	99	98	0	0.381	0.416	0.400	0.486	2.055	0.375	0.855	156	709	2869	2520	-1.391	792	2077	740	1780	0
3	5	18	"iYNL267W"	"iYNL267W"	11870	17660	140	643	651	369	99	102	32	99	97	0	1108	1027	438	37	38	17	98	97	0	0.508	0.558	0.514	0.583	1.998	0.578	0.697	156	615	1615	1542	-0.977	544	1071	552	990	0
3	6	18	"iYNL262W"	"iYNL262W"	12070	17660	140	341	338	112	97	101	36	97	89	0	935	848	361	37	37	16	98	96	0	0.272	0.297	0.280	0.301	1.913	0.274	0.746	156	636	1142	1052	-1.880	244	898	241	811	0
3	7	18	"iYNL244C"	"iYNL244C"	12280	17660	140	406	391	133	101	105	38	95	92	0	1857	1599	791	38	39	20	98	95	0	0.168	0.186	0.185	0.227	2.270	0.163	0.744	156	613	2124	1851	-2.576	305	1819	290	1561	0
3	8	18	"iYNL240C"	"iYNL240C"	12470	17660	140	219	222	72	103	108	40	87	69	0	752	726	351	38	40	22	98	97	0	0.162	0.173	0.173	0.186	2.397	0.152	0.565	156	618	830	807	-2.622	116	714	119	688	0
3	9	18	"iYNL235C"	"iYNL235C"	12680	17660	140	575	567	215	100	106	39	100	97	0	1737	1516	639	38	40	20	99	99	0	0.280	0.316	0.307	0.329	1.679	0.300	0.853	156	610	2174	1945	-1.839	475	1699	467	1478	0
3	10	18	"iYNL217W"	"iYNL217W"	12870	17660	140	497	483	168	101	105	31	98	97	0	1477	1314	558	37	41	49	99	98	0	0.275	0.299	0.305	0.307	1.933	0.283	0.819	156	560	1836	1659	-1.862	396	1440	382	1277	0
3	11	18	"iYNL213C"	"iYNL213C"	13060	17660	140	1077	1012	387	100	104	35	99	98	0	3242	2841	1229	38	43	66	98	97	0	0.305	0.325	0.314	0.342	1.788	0.310	0.896	156	551	4181	3715	-1.713	977	3204	912	2803	0
3	12	18	"iYNL209W"	"iYNL209W"	13280	17660	140	763	755	257	104	119	215	94	85	0	2166	1941	816	40	47	70	99	96	0	0.310	0.342	0.331	0.371	1.641	0.313	0.823	156	579	2785	2552	-1.690	659	2126	651	1901	0
3	13	18	"iYNL189W"	"iYNL189W"	13450	17650	140	812	800	368	105	127	249	84	69	0	1456	1249	669	40	50	86	94	87	0	0.499	0.575	0.543	0.645	2.293	0.603	0.599	156	566	2123	1904	-1.002	707	1416	695	1209	0
3	14	18	"iYNL184C"	"iYNL184C"	13660	17660	130	1610	1468	517	101	103	32	100	100	0	1568	1385	598	38	39	25	97	96	0	0.986	1.015	1.028	1.187	1.858	0.974	0.892	120	566	3039	2714	-0.020	1509	1530	1367	1347	0
3	15	18	"iYNL179C-0"	"iYNL179C-0"	13870	17650	140	331	358	203	102	105	32	96	91	0	681	760	507	37	38	17	96	96	0	0.356	0.354	0.347	0.370	2.133	0.308	0.601	156	571	873	979	-1.492	229	644	256	723	0
3	16	18	"iYOL125W"	"iYOL125W"	14060	17660	140	424	415	139	100	103	31	98	96	0	733	658	278	37	38	18	96	95	0	0.466	0.507	0.487	0.576	2.196	0.469	0.770	156	545	1020	936	-1.103	324	696	315	621	0
3	17	18	"iYOL121C"	"iYOL121C"	14260	17660	150	329	332	97	98	103	33	99	97	0	1720	1538	686	38	39	18	98	98	0	0.137	0.156	0.156	0.182	2.383	0.131	0.719	156	566	1913	1734	-2.864	231	1682	234	1500	0
3	18	18	"iYOL117W"	"iYOL117W"	14470	17650	140	428	413	164	98	102	32	98	94	0	1910	1701	805	39	40	18	98	98	0	0.176	0.190	0.180	0.210	2.095	0.167	0.748	156	560	2201	1977	-2.503	330	1871	315	1662	0
3	19	18	"iYOLWdelta5"	"iYOLWdelta5"	14660	17650	130	866	1054	1866	98	103	39	100	100	0	1682	1664	1411	39	56	238	95	89	0	0.467	0.588	0.479	0.540	1.818	0.994	0.305	120	518	2411	2581	-1.097	768	1643	956	1625	0
3	20	18	"iYOL099C"	"iYOL099C"	14860	17650	130	2455	2371	858	101	112	100	100	100	0	1366	1212	551	39	58	236	92	81	0	1.774	1.935	1.884	2.175	1.700	1.825	0.782	120	543	3681	3443	0.827	2354	1327	2270	1173	0
3	21	18	"iYOL096C"	"iYOL096C"	15070	17660	140	533	506	197	100	109	90	92	85	0	1754	1513	675	38	41	42	99	98	0	0.252	0.275	0.261	0.285	1.891	0.259	0.829	156	741	2149	1881	-1.987	433	1716	406	1475	0
3	1	19	"iYOL081W"	"iYOL081W"	11070	17860	140	1114	1119	417	100	104	39	100	98	0	1871	1743	691	39	40	19	99	98	0	0.553	0.598	0.577	0.631	1.737	0.579	0.879	156	697	2846	2723	-0.853	1014	1832	1019	1704	0
3	2	19	"iYOL076W"	"iYOL076W"	11270	17860	140	2181	1996	823	103	104	33	99	98	0	1560	1318	620	38	40	19	98	97	0	1.365	1.479	1.449	1.637	1.677	1.463	0.916	156	518	3600	3173	0.449	2078	1522	1893	1280	0
3	3	19	"iYOL071W"	"iYOL071W"	11460	17860	140	1166	1122	495	103	107	44	99	98	0	1086	1001	537	37	40	26	96	94	0	1.013	1.057	1.006	1.168	1.795	1.019	0.891	156	597	2112	1983	0.019	1063	1049	1019	964	0
3	4	19	"iYOL055C"	"iYOL055C"	11680	17860	150	574	538	180	100	104	37	100	96	0	1110	1008	417	38	40	20	98	97	0	0.442	0.452	0.449	0.505	1.867	0.425	0.862	156	584	1546	1408	-1.177	474	1072	438	970	0
3	5	19	"iYOL054W"	"iYOL054W"	11860	17860	150	1034	1011	416	101	104	37	99	96	0	2672	2441	1141	38	39	20	99	98	0	0.354	0.379	0.370	0.387	1.725	0.358	0.892	156	548	3567	3313	-1.497	933	2634	910	2403	0
3	6	19	"iYOL050C"	"iYOL050C"	12060	17860	140	655	653	216	100	103	32	100	98	0	1450	1304	541	38	38	17	98	98	0	0.393	0.437	0.426	0.463	1.827	0.407	0.862	156	572	1967	1819	-1.347	555	1412	553	1266	0
3	7	19	"iYOR248W"	"iYOR248W"	12270	17850	140	1216	1143	505	100	102	31	97	96	0	2030	1897	934	38	39	20	99	98	0	0.560	0.561	0.531	0.578	1.825	0.539	0.891	156	570	3108	2902	-0.836	1116	1992	1043	1859	0
3	8	19	"iYOR252W"	"iYOR252W"	12470	17860	140	384	383	154	102	108	46	94	89	0	1128	962	463	39	40	21	100	98	0	0.259	0.304	0.305	0.327	2.194	0.281	0.767	156	544	1371	1204	-1.949	282	1089	281	923	0
3	9	19	"iYOR256C"	"iYOR256C"	12670	17860	140	597	569	196	101	107	46	97	96	0	2498	2239	990	38	39	20	98	98	0	0.202	0.213	0.210	0.240	2.106	0.193	0.844	156	556	2956	2669	-2.310	496	2460	468	2201	0
3	10	19	"iYOR272W"	"iYOR272W"	12880	17850	140	964	926	339	99	102	30	100	100	0	1189	1069	469	37	39	22	98	97	0	0.751	0.801	0.790	0.861	1.712	0.769	0.891	156	544	2017	1859	-0.413	865	1152	827	1032	0
3	11	19	"iYOR277C"	"iYOR277C"	13080	17850	140	2571	2526	905	98	102	32	100	100	0	4868	4194	1627	38	38	16	100	100	0	0.512	0.584	0.563	0.603	1.420	0.569	0.904	156	554	7303	6584	-0.966	2473	4830	2428	4156	0
3	12	19	"iYOR283W"	"iYOR283W"	13280	17850	140	1316	1239	465	100	115	219	94	89	0	3772	3245	1425	39	43	55	99	98	0	0.326	0.355	0.340	0.377	1.670	0.335	0.906	156	550	4949	4345	-1.618	1216	3733	1139	3206	0
3	13	19	"iYOR298W"	"iYOR298W"	13480	17850	140	397	387	146	100	121	247	61	8	0	1040	959	478	38	46	85	94	87	0	0.296	0.312	0.304	0.326	2.118	0.423	0.328	156	574	1299	1208	-1.754	297	1002	287	921	0
3	14	19	"iYOR303W"	"iYOR303W"	13690	17840	140	591	551	223	100	104	33	97	94	0	1912	1576	751	38	40	24	98	97	0	0.262	0.293	0.291	0.312	1.760	0.277	0.824	156	600	2365	1989	-1.932	491	1874	451	1538	0
3	15	19	"iYOR306C"	"iYOR306C"	13890	17850	140	1336	1254	497	101	105	32	100	99	0	3682	3318	1537	40	40	19	100	100	0	0.339	0.352	0.348	0.388	1.674	0.333	0.912	156	557	4877	4431	-1.560	1235	3642	1153	3278	0
3	16	19	"iYOR322C"	"iYOR322C"	14090	17850	140	547	503	173	102	104	31	97	95	0	2496	2217	1057	39	39	17	99	97	0	0.181	0.184	0.178	0.206	1.944	0.168	0.863	156	512	2902	2579	-2.465	445	2457	401	2178	0
3	17	19	"iYOR327C"	"iYOR327C"	14270	17850	140	678	630	255	101	104	30	100	96	0	2222	1936	902	38	42	47	98	96	0	0.264	0.279	0.265	0.297	1.824	0.266	0.858	156	535	2761	2427	-1.920	577	2184	529	1898	0
3	18	19	"iYOR332W"	"iYOR332W"	14470	17850	140	867	837	314	103	105	32	98	98	0	2901	2544	1133	40	45	68	98	95	0	0.267	0.293	0.292	0.318	1.851	0.274	0.883	156	637	3625	3238	-1.905	764	2861	734	2504	0
3	19	19	"iYPL045W"	"iYPL045W"	14700	17850	140	455	438	172	104	109	43	93	87	0	1315	1131	525	39	47	70	93	88	0	0.275	0.306	0.305	0.338	1.876	0.290	0.820	156	586	1627	1426	-1.862	351	1276	334	1092	0
3	20	19	"iYPL040C"	"iYPL040C"	14870	17850	140	386	402	213	102	113	99	91	71	0	1224	1120	528	39	45	55	96	92	0	0.240	0.278	0.247	0.295	2.507	0.255	0.480	156	547	1469	1381	-2.061	284	1185	300	1081	0
3	21	19	"iYPL036W"	"iYPL036W"	15070	17850	130	2382	2142	732	98	106	60	100	98	0	3256	2801	1204	38	41	32	98	97	0	0.710	0.740	0.716	0.824	1.681	0.684	0.906	120	622	5502	4807	-0.495	2284	3218	2044	2763	0
3	1	20	"iYPL017C"	"iYPL017C"	11080	18060	140	556	598	275	101	104	38	98	97	0	943	936	519	37	39	18	97	95	0	0.502	0.553	0.525	0.622	2.198	0.517	0.776	156	812	1361	1396	-0.994	455	906	497	899	0
3	2	20	"iYPL013C"	"iYPL013C"	11270	18060	150	744	722	277	100	102	30	99	98	0	1924	1785	973	37	39	18	98	96	0	0.341	0.356	0.350	0.435	2.281	0.318	0.871	156	748	2531	2370	-1.551	644	1887	622	1748	0
3	3	20	"iYPL009C"	"iYPL009C"	11480	18060	140	693	681	279	101	104	32	99	98	0	1233	1187	586	37	38	18	98	97	0	0.495	0.504	0.500	0.557	1.832	0.480	0.864	156	709	1788	1730	-1.015	592	1196	580	1150	0
3	4	20	"iYPR005C"	"iYPR005C"	11670	18050	140	606	583	208	100	105	39	98	95	0	1611	1482	676	38	41	23	96	96	0	0.322	0.334	0.320	0.375	1.913	0.310	0.855	156	678	2079	1927	-1.636	506	1573	483	1444	0
3	5	20	"itG(GCC)P1"	"itG(GCC)P1"	11880	18060	140	1945	1851	735	100	105	38	100	99	0	2662	2340	998	38	40	23	100	98	0	0.703	0.761	0.728	0.814	1.734	0.746	0.894	156	705	4469	4053	-0.508	1845	2624	1751	2302	0
3	6	20	"itK(CUU)P"	"itK(CUU)P"	12080	18060	140	1370	1288	549	101	105	34	100	99	0	3894	3429	1701	38	39	22	100	100	0	0.329	0.350	0.339	0.388	1.830	0.323	0.867	156	732	5125	4578	-1.603	1269	3856	1187	3391	0
3	7	20	"iYPR024W"	"iYPR024W"	12290	18060	150	3296	3005	1342	99	103	38	100	100	0	2891	2665	1412	39	39	20	99	98	0	1.121	1.107	1.071	1.263	1.825	1.066	0.932	156	779	6049	5532	0.165	3197	2852	2906	2626	0
3	8	20	"itF(GAA)P2"	"itF(GAA)P2"	12480	18060	140	1067	1086	459	102	106	41	99	98	0	1543	1627	869	38	39	21	99	99	0	0.641	0.619	0.598	0.691	1.813	0.576	0.883	156	686	2470	2573	-0.641	965	1505	984	1589	0
3	9	20	"iYPR031W"	"iYPR031W"	12680	18060	140	726	710	248	101	106	41	98	97	0	2107	1917	777	39	39	19	100	99	0	0.302	0.324	0.325	0.340	1.693	0.305	0.861	156	678	2693	2487	-1.726	625	2068	609	1878	0
3	10	20	"CEN3"	"CEN3"	12860	18060	140	187	198	66	98	102	31	88	66	0	178	213	149	38	39	22	91	85	0	0.636	0.571	0.576	0.605	2.727	0.420	0.494	156	711	229	275	-0.654	89	140	100	175	0
3	11	20	"iRDN5-2"	"iRDN5-2"	13060	18050	130	1700	1690	527	97	101	31	100	99	0	3832	3378	1308	37	41	40	98	98	0	0.422	0.477	0.453	0.545	1.935	0.442	0.882	120	639	5398	4934	-1.243	1603	3795	1593	3341	0
3	12	20	"itN(GUU)C"	"itN(GUU)C"	13250	18050	120	491	570	332	100	102	30	95	95	0	903	1033	715	37	40	38	94	91	0	0.452	0.472	0.396	0.518	2.456	0.424	0.738	120	607	1257	1466	-1.147	391	866	470	996	0
3	13	20	"iYCL018W"	"iYCL018W"	13470	18050	140	6038	5672	2345	98	101	30	100	100	0	2314	2034	898	36	39	20	99	99	0	2.608	2.790	2.668	2.942	1.641	2.826	0.933	156	786	8218	7572	1.383	5940	2278	5574	1998	0
3	14	20	"iYCR003W"	"iYCR003W"	13680	18060	140	3351	3139	1127	99	102	30	100	100	0	1662	1428	588	37	38	19	99	99	0	2.001	2.185	2.090	2.350	1.687	2.197	0.910	156	754	4877	4431	1.001	3252	1625	3040	1391	0
3	15	20	"iYCR007C"	"iYCR007C"	13870	18060	140	5758	5459	1780	99	103	30	100	100	0	3511	2991	1220	38	39	18	98	98	0	1.629	1.815	1.745	1.965	1.514	1.784	0.931	156	715	9132	8313	0.704	5659	3473	5360	2953	0
3	16	20	"iYHR212C"	"iYHR212C"	14070	18060	140	3698	3565	1311	99	102	33	100	100	0	5093	4854	1916	39	40	19	100	100	0	0.712	0.720	0.712	0.765	1.451	0.710	0.911	156	739	8653	8281	-0.490	3599	5054	3466	4815	0
3	17	20	"iYHR214W-A"	"iYHR214W-A"	14280	18060	140	1078	1062	373	99	103	33	100	99	0	1983	1790	740	37	41	42	99	96	0	0.503	0.549	0.527	0.599	1.752	0.519	0.881	156	738	2925	2716	-0.991	979	1946	963	1753	0
3	18	20	"iYHR218W"	"iYHR218W"	14480	18060	140	12330	10933	3510	103	105	33	100	100	0	24917	20860	8219	38	43	64	100	100	0	0.491	0.520	0.506	0.561	1.467	0.494	0.947	156	740	37106	31652	-1.025	12227	24879	10830	20822	0
3	19	20	"iYLR162W-A"	"iYLR162W-A"	14680	18060	150	5991	6246	3045	104	107	38	100	100	0	7063	6784	3270	38	43	55	100	100	0	0.838	0.910	0.876	0.956	1.545	0.909	0.924	156	775	12912	12888	-0.255	5887	7025	6142	6746	0
3	20	20	"iYLRWdelta6-B"	"iYLRWdelta6-B"	14870	18050	140	23346	22313	8904	101	105	37	100	100	0	8973	7761	3212	38	41	29	100	100	0	2.602	2.876	2.726	3.065	1.629	3.002	0.913	156	661	32180	29935	1.379	23245	8935	22212	7723	0
3	21	20	"RDN5-1"	"RDN5-1"	15060	18050	140	6847	6399	2598	100	105	49	100	100	0	2353	2131	968	37	40	27	98	98	0	2.913	3.008	2.935	3.328	1.822	3.013	0.933	156	855	9063	8393	1.543	6747	2316	6299	2094	0
4	1	1	"TFC3"	"YAL001C"	15560	14140	140	5711	6054	3815	102	112	104	99	98	0	3045	2966	1793	40	53	115	96	94	0	1.867	2.034	1.933	2.131	1.547	2.163	0.901	156	815	8614	8878	0.900	5609	3005	5952	2926	0
4	2	1	"FUN19"	"YAL034C"	15740	14130	140	2072	2511	1681	103	116	119	100	97	0	1584	1752	1207	41	47	60	96	95	0	1.276	1.407	1.407	1.556	1.669	1.423	0.919	156	742	3512	4119	0.352	1969	1543	2408	1711	0
4	3	1	"YAL065C"	"YAL065C"	15960	14130	150	3809	4356	2492	103	110	60	98	96	0	7849	7891	4347	43	51	118	96	93	0	0.475	0.542	0.521	0.587	1.588	0.564	0.917	156	851	11512	12101	-1.075	3706	7806	4253	7848	0
4	4	1	"EFB1"	"YAL003W"	16150	14130	150	1892	1784	504	103	109	42	98	98	0	3350	3050	1037	42	50	121	98	97	0	0.541	0.559	0.539	0.584	1.397	0.538	0.933	156	793	5097	4689	-0.887	1789	3308	1681	3008	0
4	5	1	"YAL035C-A"	"YAL035C-A"	16350	14130	150	5356	5071	1611	102	107	39	100	100	0	2897	2633	967	40	41	21	98	98	0	1.839	1.916	1.878	2.045	1.363	1.878	0.952	156	784	8111	7562	0.879	5254	2857	4969	2593	0
4	6	1	"YAL066W"	"YAL066W"	16550	14130	150	453	475	190	100	104	39	96	95	0	1988	1825	726	40	41	23	98	98	0	0.181	0.210	0.201	0.214	1.721	0.201	0.815	156	808	2301	2160	-2.464	353	1948	375	1785	0
4	7	1	"SSA1"	"YAL005C"	16760	14130	150	4729	4453	1847	103	107	39	100	99	0	6069	5364	2583	39	41	22	99	99	0	0.767	0.817	0.797	0.935	1.715	0.781	0.919	156	822	10656	9675	-0.382	4626	6030	4350	5325	0
4	8	1	"FUN11"	"YAL036C"	16960	14130	140	3459	3181	1051	104	112	55	100	98	0	5724	4942	1963	41	60	163	97	96	0	0.590	0.628	0.617	0.702	1.614	0.597	0.932	156	702	9038	7978	-0.760	3355	5683	3077	4901	0
4	9	1	"YAL068C"	"YAL068C"	17140	14140	140	11695	10927	4447	107	121	69	100	100	0	16942	14247	6229	45	77	209	98	96	0	0.686	0.762	0.740	0.854	1.531	0.743	0.945	156	707	28485	25022	-0.544	11588	16897	10820	14202	0
4	10	1	"FUN14"	"YAL008W"	17360	14140	150	10643	9520	3573	105	115	47	100	100	0	5631	4886	2119	44	51	36	97	96	0	1.886	1.944	1.890	2.211	1.621	1.918	0.945	156	828	16125	14257	0.915	10538	5587	9415	4842	0
4	11	1	"CDC19"	"YAL038W"	17560	14130	150	1801	1680	617	101	108	42	100	98	0	4664	3984	1660	40	56	339	93	90	0	0.368	0.400	0.392	0.430	1.547	0.384	0.926	156	813	6324	5523	-1.444	1700	4624	1579	3944	0
4	12	1	"ERP1"	"YAR002C-A"	17760	14140	140	246	292	187	102	107	40	83	70	0	274	341	303	40	57	358	25	8	0	0.615	0.631	0.629	0.635	2.033	0.129	0.163	156	728	378	491	-0.700	144	234	190	301	0
4	13	1	"RPB5"	"YBR154C"	17960	14140	140	3091	3063	1273	101	106	35	99	99	0	4490	3963	1616	42	45	31	98	98	0	0.672	0.755	0.720	0.820	1.492	0.742	0.913	156	694	7438	6883	-0.573	2990	4448	2962	3921	0
4	14	1	"MBA1"	"YBR185C"	18140	14140	140	1128	1131	409	99	104	37	100	98	0	3187	2937	1225	41	42	29	99	98	0	0.327	0.356	0.351	0.390	1.566	0.337	0.919	156	690	4175	3928	-1.612	1029	3146	1032	2896	0
4	15	1	"APG12"	"YBR217W"	18340	14140	140	2831	2682	709	99	105	37	100	100	0	4496	4055	1402	40	44	52	99	98	0	0.613	0.643	0.625	0.701	1.422	0.616	0.943	156	712	7188	6598	-0.706	2732	4456	2583	4015	0
4	16	1	"SLI15"	"YBR156C"	18540	14140	140	3094	2976	1026	99	103	43	100	99	0	5687	5413	2172	39	44	49	98	96	0	0.530	0.535	0.532	0.596	1.516	0.511	0.941	156	741	8643	8251	-0.915	2995	5648	2877	5374	0
4	17	1	"YBR187W"	"YBR187W"	18740	14140	140	388	423	183	98	102	42	97	94	0	1176	1323	695	40	41	23	97	96	0	0.255	0.253	0.254	0.273	1.845	0.243	0.857	156	736	1426	1608	-1.970	290	1136	325	1283	0
4	18	1	"YBR219C"	"YBR219C"	18940	14140	140	621	610	199	99	105	54	96	95	0	2602	2402	966	40	54	278	92	91	0	0.204	0.216	0.216	0.231	1.690	0.198	0.850	156	767	3084	2873	-2.295	522	2562	511	2362	0
4	19	1	"ICS4"	"YBR158W"	19160	14150	140	2173	2026	718	101	108	56	100	99	0	5856	5131	2189	42	60	280	96	92	0	0.356	0.378	0.371	0.428	1.586	0.357	0.943	156	764	7886	7014	-1.489	2072	5814	1925	5089	0
4	20	1	"RPS9B"	"YBR189W"	19370	14140	140	1410	1291	499	101	109	61	98	95	0	4442	3804	1844	43	54	61	96	95	0	0.298	0.316	0.316	0.377	1.769	0.296	0.924	156	707	5708	4951	-1.749	1309	4399	1190	3761	0
4	21	1	"PDB1"	"YBR221C"	19550	14140	150	700	688	250	102	107	50	98	95	0	4274	3775	1725	43	50	54	97	96	0	0.141	0.157	0.153	0.181	1.803	0.145	0.889	156	932	4829	4318	-2.823	598	4231	586	3732	0
4	1	2	"CDC28"	"YBR160W"	15540	14350	150	1714	1634	498	103	113	106	99	97	0	6504	5744	2073	43	51	63	100	98	0	0.249	0.269	0.259	0.292	1.585	0.255	0.930	156	802	8072	7232	-2.004	1611	6461	1531	5701	0
4	2	2	"RPL21A"	"YBR191W"	15740	14350	150	837	797	254	105	116	116	94	91	0	3773	3253	1324	42	50	66	97	95	0	0.196	0.216	0.212	0.245	1.804	0.194	0.524	156	642	4463	3903	-2.350	732	3731	692	3211	0
4	3	2	"YBR223C"	"YBR223C"	15960	14350	140	637	631	242	102	106	32	97	96	0	3674	3224	1416	41	44	30	96	95	0	0.147	0.166	0.151	0.188	2.107	0.151	0.813	156	664	4168	3712	-2.764	535	3633	529	3183	0
4	4	2	"RPN4"	"YDL020C"	16170	14350	150	907	930	465	103	109	38	96	96	0	970	978	559	41	46	43	94	94	0	0.865	0.883	0.877	0.899	1.817	0.879	0.904	156	600	1733	1764	-0.208	804	929	827	937	0
4	5	2	"SLC1"	"YDL052C"	16350	14340	140	329	348	150	103	108	41	96	89	0	1212	1188	597	41	45	42	96	94	0	0.193	0.214	0.210	0.230	1.953	0.201	0.743	156	580	1397	1392	-2.373	226	1171	245	1147	0
4	6	2	"SUB2"	"YDL084W"	16550	14340	140	1063	1049	378	100	102	30	100	99	0	2010	1880	839	40	40	18	100	98	0	0.489	0.516	0.499	0.590	1.798	0.485	0.907	156	628	2933	2789	-1.033	963	1970	949	1840	0
4	7	2	"GPD1"	"YDL022W"	16750	14340	150	638	617	215	100	104	41	96	95	0	1551	1394	565	40	42	40	97	95	0	0.356	0.382	0.384	0.412	1.733	0.369	0.882	156	672	2049	1871	-1.490	538	1511	517	1354	0
4	8	2	"YDL054C"	"YDL054C"	16960	14350	140	1345	1362	729	104	129	119	93	89	0	3252	3024	1514	42	122	375	91	85	0	0.387	0.422	0.405	0.472	1.914	0.406	0.832	156	629	4451	4240	-1.371	1241	3210	1258	2982	-100
4	9	2	"YDL086W"	"YDL086W"	17160	14340	150	249	287	190	111	139	120	51	37	0	671	759	679	44	130	386	53	46	0	0.220	0.246	0.274	0.363	2.829	0.262	0.760	156	586	765	891	-2.184	138	627	176	715	-50
4	10	2	"YDL024C"	"YDL024C"	17350	14350	140	1119	1078	379	106	114	42	98	98	0	2877	2590	1066	41	47	32	99	98	0	0.357	0.381	0.376	0.404	1.519	0.358	0.910	156	585	3849	3521	-1.485	1013	2836	972	2549	0
4	11	2	"MBP1"	"YDL056W"	17560	14350	140	576	636	320	103	107	37	96	93	0	671	665	304	39	44	30	96	94	0	0.748	0.851	0.866	0.819	1.558	0.901	0.873	156	595	1105	1159	-0.418	473	632	533	626	0
4	12	2	"ASM4"	"YDL088C"	17740	14350	150	344	363	130	101	107	37	97	95	0	683	642	248	40	43	28	96	94	0	0.378	0.435	0.398	0.461	1.934	0.391	0.680	156	607	886	864	-1.404	243	643	262	602	0
4	13	2	"YDL026W"	"YDL026W"	17950	14350	140	1467	1470	533	102	109	45	100	98	0	2825	2540	998	42	46	36	98	97	0	0.490	0.548	0.533	0.595	1.592	0.519	0.913	156	598	4148	3866	-1.028	1365	2783	1368	2498	0
4	14	2	"USO1"	"YDL058W"	18150	14350	140	851	837	252	99	107	48	100	98	0	2019	1965	702	42	45	36	100	98	0	0.380	0.384	0.386	0.404	1.662	0.371	0.852	156	552	2729	2661	-1.395	752	1977	738	1923	0
4	15	2	"RAM1"	"YDL090C"	18350	14340	140	890	860	313	99	103	37	98	97	0	3033	2831	1193	42	46	56	98	96	0	0.264	0.273	0.271	0.309	2.049	0.261	0.902	156	577	3782	3550	-1.919	791	2991	761	2789	0
4	16	2	"CPH1"	"YDR155C"	18560	14360	140	316	323	118	100	105	48	94	89	0	1384	1229	489	42	47	60	95	93	0	0.161	0.188	0.182	0.207	2.111	0.172	0.716	156	568	1558	1410	-2.635	216	1342	223	1187	0
4	17	2	"YDR186C"	"YDR186C"	18750	14340	130	275	302	153	99	103	37	92	83	0	384	391	205	43	45	35	95	91	0	0.516	0.583	0.577	0.581	2.087	0.599	0.692	120	530	517	551	-0.954	176	341	203	348	0
4	18	2	"SPR28"	"YDR218C"	18950	14350	140	219	235	81	100	105	52	88	58	0	538	518	182	43	44	27	99	98	0	0.240	0.284	0.258	0.262	2.067	0.282	0.461	156	647	614	610	-2.056	119	495	135	475	0
4	19	2	"YDR157W"	"YDR157W"	19160	14350	140	1181	1130	421	100	108	61	99	98	0	2311	2036	919	42	44	32	98	98	0	0.476	0.517	0.525	0.587	1.777	0.481	0.890	156	574	3350	3024	-1.070	1081	2269	1030	1994	0
4	20	2	"CCT6"	"YDR188W"	19350	14350	140	573	594	234	102	109	48	100	97	0	2149	2071	984	46	52	39	98	98	0	0.224	0.243	0.235	0.262	1.941	0.214	0.774	156	554	2574	2517	-2.159	471	2103	492	2025	0
4	21	2	"YDR220C"	"YDR220C"	19550	14350	140	707	728	277	102	106	36	100	100	0	2378	2152	855	45	51	50	99	98	0	0.259	0.297	0.288	0.318	1.731	0.281	0.845	156	722	2938	2733	-1.947	605	2333	626	2107	0
4	1	3	"SAC3"	"YDR159W"	15580	14550	140	1243	1254	610	102	107	41	98	96	0	5376	4804	2562	41	47	80	95	92	0	0.214	0.242	0.239	0.277	1.748	0.235	0.921	156	668	6476	5915	-2.225	1141	5335	1152	4763	0
4	2	3	"RVB1"	"YDR190C"	15770	14550	140	944	913	383	103	107	37	99	98	0	1449	1300	652	41	47	88	94	90	0	0.597	0.643	0.628	0.722	1.812	0.585	0.818	156	527	2249	2069	-0.743	841	1408	810	1259	0
4	3	3	"YDR222W"	"YDR222W"	15960	14560	140	513	542	252	101	104	31	96	94	0	1509	1454	818	39	41	22	96	96	0	0.280	0.312	0.316	0.336	1.716	0.286	0.807	156	532	1882	1856	-1.835	412	1470	441	1415	0
4	4	3	"TCI1"	"YDR161W"	16150	14550	140	7129	6583	1847	104	112	48	100	100	0	4613	4101	1413	40	53	67	100	98	0	1.536	1.595	1.559	1.716	1.488	1.580	0.942	156	520	11598	10540	0.619	7025	4573	6479	4061	0
4	5	3	"NUP42"	"YDR192C"	16340	14550	150	4187	3969	1105	105	112	47	100	100	0	6267	5535	1911	43	55	65	98	97	0	0.656	0.704	0.655	0.766	1.620	0.665	0.910	156	568	10306	9356	-0.609	4082	6224	3864	5492	0
4	6	3	"HTB1"	"YDR224C"	16550	14550	150	1505	1458	486	99	102	31	100	100	0	2970	2710	1046	41	42	23	99	98	0	0.480	0.509	0.506	0.560	1.690	0.489	0.913	156	656	4335	4028	-1.059	1406	2929	1359	2669	0
4	7	3	"PAD1"	"YDR538W"	16760	14550	140	517	497	167	100	106	44	99	95	0	2238	2060	838	40	43	42	100	98	0	0.190	0.197	0.197	0.211	1.745	0.185	0.838	156	599	2615	2417	-2.398	417	2198	397	2020	0
4	8	3	"RIP1"	"YEL024W"	16960	14560	140	1129	1075	397	107	123	101	99	92	0	3118	2787	1259	43	87	392	92	86	0	0.332	0.353	0.354	0.404	1.723	0.318	0.858	156	568	4097	3712	-1.589	1022	3075	968	2744	0
4	9	3	"HAT2"	"YEL056W"	17160	14550	140	1017	1022	480	105	123	101	94	89	0	1515	1477	753	42	95	412	85	80	0	0.619	0.639	0.622	0.701	1.780	0.627	0.907	156	541	2385	2352	-0.692	912	1473	917	1435	0
4	10	3	"YDR540C"	"YDR540C"	17340	14550	140	475	497	184	100	105	32	100	99	0	1416	1485	578	37	40	27	99	98	0	0.272	0.274	0.254	0.283	1.706	0.264	0.846	156	539	1754	1845	-1.879	375	1379	397	1448	0
4	11	3	"SNU13"	"YEL026W"	17550	14550	140	4157	4065	1090	103	105	34	100	100	0	3205	2914	1024	37	38	17	100	100	0	1.280	1.377	1.332	1.534	1.724	1.337	0.939	156	577	7222	6839	0.356	4054	3168	3962	2877	0
4	12	3	"PCM1"	"YEL058W"	17760	14550	140	1392	1319	527	102	107	40	100	99	0	3368	3078	1381	38	40	33	99	98	0	0.387	0.400	0.396	0.430	1.620	0.380	0.897	156	612	4620	4257	-1.368	1290	3330	1217	3040	0
4	13	3	"YDR542W"	"YDR542W"	17980	14550	140	9164	8525	3917	101	109	50	100	100	0	13229	11280	5479	40	43	40	100	98	0	0.687	0.749	0.727	0.860	1.768	0.734	0.918	156	565	22252	19664	-0.541	9063	13189	8424	11240	0
4	14	3	"YEL028W"	"YEL028W"	18170	14550	140	644	656	253	100	106	44	96	93	0	1317	1293	644	42	43	28	96	94	0	0.427	0.444	0.428	0.493	1.788	0.409	0.864	156	533	1819	1807	-1.229	544	1275	556	1251	0
4	15	3	"YEL059W"	"YEL059W"	18360	14540	150	135	156	83	102	106	32	52	26	0	64	113	144	42	42	20	53	33	0	1.500	0.761	1.182	1.087	3.868	0.519	0.495	156	629	55	125	0.585	33	22	54	71	-50
4	16	3	"YDR544C"	"YDR544C"	18580	14540	150	31974	29712	10681	107	116	53	100	99	0	31099	27501	11231	44	55	58	100	99	0	1.026	1.078	1.057	1.183	1.681	1.038	0.944	156	584	62922	57062	0.037	31867	31055	29605	27457	0
4	17	3	"ECM10"	"YEL030W"	18750	14550	140	4393	4312	1378	104	115	54	100	100	0	5767	5242	1882	44	55	58	100	100	0	0.749	0.810	0.798	0.861	1.434	0.789	0.918	156	570	10012	9406	-0.416	4289	5723	4208	5198	0
4	18	3	"CIN8"	"YEL061C"	18960	14560	140	351	382	185	102	105	32	97	91	0	488	504	314	41	43	24	95	92	0	0.557	0.605	0.609	0.653	1.902	0.577	0.817	156	540	696	743	-0.844	249	447	280	463	0
4	19	3	"YFR022W"	"YFR022W"	19150	14550	140	5321	5269	1998	103	108	49	100	100	0	6315	5788	2481	41	44	32	100	100	0	0.832	0.899	0.865	1.004	1.745	0.865	0.919	156	530	11492	10913	-0.266	5218	6274	5166	5747	0
4	20	3	"RPN12"	"YFR052W"	19350	14550	140	1864	1784	503	103	110	49	100	100	0	3402	3084	1129	43	47	34	99	99	0	0.524	0.553	0.539	0.606	1.655	0.518	0.919	156	559	5120	4722	-0.932	1761	3359	1681	3041	0
4	21	3	"CWH41"	"YGL027C"	19550	14550	140	3496	3328	1138	102	106	32	100	100	0	7790	7096	2698	42	44	23	100	100	0	0.438	0.457	0.441	0.494	1.525	0.438	0.920	156	681	11142	10280	-1.191	3394	7748	3226	7054	0
4	1	4	"YFR024C"	"YFR024C"	15570	14750	150	8972	8155	2832	103	106	32	100	100	0	5632	4798	2023	40	44	74	95	94	0	1.586	1.692	1.619	1.959	1.827	1.663	0.920	156	749	14461	12810	0.665	8869	5592	8052	4758	0
4	2	4	"YFR054C"	"YFR054C"	15770	14760	150	3372	3097	980	102	106	39	100	100	0	4003	3350	1443	40	45	86	97	96	0	0.825	0.905	0.867	1.011	1.565	0.834	0.911	156	541	7233	6305	-0.277	3270	3963	2995	3310	0
4	3	4	"CGR1"	"YGL029W"	15950	14750	140	2249	2186	707	103	112	73	100	98	0	2159	2002	760	40	58	187	94	91	0	1.013	1.062	1.018	1.176	1.723	1.023	0.882	156	601	4265	4045	0.018	2146	2119	2083	1962	0
4	4	4	"HIS2"	"YFR025C"	16170	14750	140	2375	2185	742	105	113	52	99	98	0	4416	3797	1622	39	50	55	99	96	0	0.519	0.553	0.533	0.621	1.728	0.513	0.897	156	573	6647	5838	-0.947	2270	4377	2080	3758	0
4	5	4	"YFR056C"	"YFR056C"	16350	14750	150	758	705	240	106	113	46	96	95	0	2902	2533	1030	40	50	53	97	96	0	0.228	0.240	0.228	0.257	1.884	0.227	0.866	156	581	3514	3092	-2.134	652	2862	599	2493	0
4	6	4	"RPL24A"	"YGL031C"	16560	14760	140	781	773	288	100	104	34	99	96	0	2119	2009	987	39	42	23	99	97	0	0.327	0.342	0.346	0.390	1.756	0.307	0.870	156	570	2761	2643	-1.611	681	2080	673	1970	0
4	7	4	"ECO1"	"YFR027W"	16750	14750	140	4429	4206	1573	101	106	35	100	100	0	5921	5357	2139	39	43	38	100	99	0	0.736	0.772	0.739	0.836	1.627	0.758	0.911	156	559	10210	9423	-0.443	4328	5882	4105	5318	0
4	8	4	"YGL001C"	"YGL001C"	16950	14750	140	8292	7768	2015	107	111	38	100	100	0	3658	3278	1135	41	56	302	98	94	0	2.263	2.367	2.314	2.539	1.495	2.327	0.895	156	566	11802	10898	1.178	8185	3617	7661	3237	0
4	9	4	"HOP2"	"YGL033W"	17160	14750	140	2177	2079	870	104	109	37	99	98	0	3619	3289	1462	40	55	300	94	92	0	0.579	0.608	0.592	0.659	1.587	0.591	0.885	156	567	5652	5224	-0.788	2073	3579	1975	3249	0
4	10	4	"MRP13"	"YGR084C"	17370	14750	140	1951	1781	620	100	103	32	98	97	0	6070	5159	2216	39	40	26	98	97	0	0.307	0.328	0.321	0.362	1.802	0.305	0.906	156	552	7882	6801	-1.704	1851	6031	1681	5120	0
4	11	4	"SPT6"	"YGR116W"	17560	14750	150	237	248	92	102	104	30	92	86	0	434	464	251	38	38	17	98	94	0	0.341	0.343	0.342	0.360	2.431	0.285	0.552	156	598	531	572	-1.553	135	396	146	426	0
4	12	4	"RPL24B"	"YGR148C"	17770	14750	140	1200	1138	414	100	103	35	97	97	0	4525	3864	1644	39	40	33	98	96	0	0.245	0.271	0.257	0.303	1.938	0.253	0.888	156	624	5586	4863	-2.028	1100	4486	1038	3825	0
4	13	4	"YGR086C"	"YGR086C"	17980	14760	150	689	736	347	100	104	37	96	96	0	4080	3614	1600	40	41	34	99	98	0	0.146	0.178	0.163	0.192	1.974	0.173	0.814	156	560	4629	4210	-2.778	589	4040	636	3574	0
4	14	4	"RPS23A"	"YGR118W"	18150	14750	140	3239	3110	902	100	103	31	100	100	0	5311	4856	1606	39	41	24	100	100	0	0.595	0.625	0.618	0.675	1.663	0.606	0.919	156	553	8411	7827	-0.748	3139	5272	3010	4817	0
4	15	4	"YGR150C"	"YGR150C"	18370	14760	150	744	782	351	100	106	41	99	96	0	885	926	494	40	59	179	89	85	0	0.762	0.770	0.790	0.843	1.780	0.756	0.804	156	658	1489	1568	-0.392	644	845	682	886	0
4	16	4	"CTT1"	"YGR088W"	18560	14750	150	2039	1943	593	104	115	56	98	97	0	6289	5550	2080	43	62	151	96	94	0	0.310	0.334	0.319	0.370	1.788	0.312	0.909	156	650	8181	7346	-1.691	1935	6246	1839	5507	0
4	17	4	"SEC35"	"YGR120C"	18780	14760	150	927	904	359	102	112	53	99	96	0	3643	3201	1394	42	51	51	99	96	0	0.229	0.254	0.247	0.285	1.970	0.239	0.862	156	606	4426	3961	-2.126	825	3601	802	3159	0
4	18	4	"RSR1"	"YGR152C"	18970	14750	140	1131	1093	426	101	103	32	98	98	0	3505	3229	1519	40	42	23	98	98	0	0.297	0.311	0.299	0.348	1.743	0.279	0.870	156	502	4495	4181	-1.750	1030	3465	992	3189	0
4	19	4	"YGR090W"	"YGR090W"	19150	14750	140	1008	1240	685	104	109	40	100	99	0	2325	2627	1529	43	53	47	98	97	0	0.396	0.440	0.429	0.469	1.913	0.405	0.831	156	592	3186	3720	-1.336	904	2282	1136	2584	0
4	20	4	"YGR122W"	"YGR122W"	19390	14750	150	1548	1515	499	107	113	43	100	100	0	4957	4359	1586	47	64	90	100	99	0	0.293	0.327	0.313	0.350	1.594	0.307	0.883	156	599	6351	5720	-1.769	1441	4910	1408	4312	0
4	21	4	"YGR154C"	"YGR154C"	19560	14750	140	752	784	247	100	106	34	100	98	0	2736	2633	1041	44	55	78	99	98	0	0.242	0.264	0.255	0.280	1.630	0.240	0.852	156	670	3344	3273	-2.046	652	2692	684	2589	0
4	1	5	"ORC6"	"YHR118C"	15570	14950	140	1708	1852	847	99	104	35	99	98	0	2522	2451	1278	38	39	18	97	97	0	0.648	0.726	0.698	0.830	1.826	0.693	0.914	156	654	4093	4166	-0.627	1609	2484	1753	2413	0
4	2	5	"IMP3"	"YHR148W"	15750	14950	150	7768	7298	2165	101	107	41	100	100	0	10501	9247	3115	40	45	51	100	100	0	0.733	0.782	0.762	0.814	1.362	0.760	0.951	156	627	18128	16404	-0.448	7667	10461	7197	9207	0
4	3	5	"YHR180W"	"YHR180W"	15990	14950	80	983	928	477	104	121	90	94	84	0	2502	2264	1517	43	80	264	86	80	0	0.357	0.371	0.385	0.456	2.557	0.325	0.879	52	309	3338	3045	-1.484	879	2459	824	2221	0
4	4	5	"MSH1"	"YHR120W"	16160	14950	130	411	473	271	101	108	55	94	87	0	602	645	409	40	47	113	87	81	0	0.552	0.615	0.625	0.650	1.888	0.608	0.829	120	575	872	977	-0.858	310	562	372	605	0
4	5	5	"YHR150W"	"YHR150W"	16370	14960	140	596	636	264	101	105	35	98	96	0	1681	1535	825	39	40	18	98	98	0	0.301	0.358	0.352	0.395	1.818	0.328	0.850	156	569	2137	2031	-1.730	495	1642	535	1496	0
4	6	5	"YHR182W"	"YHR182W"	16560	14950	140	548	612	295	100	103	34	99	97	0	518	538	228	39	41	21	98	98	0	0.935	1.026	0.979	1.023	1.573	1.098	0.841	156	538	927	1011	-0.097	448	479	512	499	0
4	7	5	"YHR122W"	"YHR122W"	16770	14960	140	478	556	322	105	124	121	97	75	0	1178	1239	566	42	61	113	100	98	0	0.328	0.377	0.341	0.348	1.574	0.404	0.741	156	569	1509	1648	-1.607	373	1136	451	1197	0
4	8	5	"SPO12"	"YHR152W"	16970	14960	140	1164	1154	431	107	128	127	96	95	0	3709	3175	1443	41	62	118	97	96	0	0.288	0.334	0.327	0.367	1.649	0.305	0.854	156	523	4725	4181	-1.795	1057	3668	1047	3134	0
4	9	5	"SSP1"	"YHR184W"	17150	14950	140	804	796	266	104	108	42	100	96	0	2000	1854	767	40	42	24	99	98	0	0.357	0.381	0.380	0.410	1.584	0.357	0.885	156	551	2660	2506	-1.485	700	1960	692	1814	0
4	10	5	"NDT80"	"YHR124W"	17360	14950	140	349	367	147	101	105	38	96	92	0	1655	1596	761	40	41	21	98	96	0	0.154	0.171	0.169	0.180	1.867	0.159	0.766	156	588	1863	1822	-2.703	248	1615	266	1556	0
4	11	5	"ESC4"	"YHR154W"	17560	14950	140	456	510	231	101	105	34	98	96	0	1322	1330	682	38	40	20	98	97	0	0.276	0.317	0.305	0.328	1.639	0.301	0.847	156	584	1639	1701	-1.855	355	1284	409	1292	0
4	12	5	"YHR186C"	"YHR186C"	17770	14960	140	200	211	84	101	104	33	85	68	0	314	331	205	38	39	18	92	91	0	0.359	0.375	0.374	0.388	2.399	0.315	0.511	156	548	375	403	-1.479	99	276	110	293	0
4	13	5	"YJL058C"	"YJL058C"	17960	14950	140	7493	8112	4188	102	104	32	100	100	0	5395	4900	2026	40	39	17	98	98	0	1.380	1.648	1.543	1.768	1.792	1.789	0.880	156	516	12746	12870	0.465	7391	5355	8010	4860	0
4	14	5	"DPB11"	"YJL090C"	18170	14960	140	1678	1625	588	102	105	32	100	100	0	5065	4526	1937	39	40	25	100	99	0	0.314	0.339	0.330	0.386	1.865	0.315	0.896	156	566	6602	6010	-1.673	1576	5026	1523	4487	0
4	15	5	"YJL122W"	"YJL122W"	18360	14950	130	678	627	247	100	111	70	94	88	0	3377	2841	1437	39	91	332	89	86	0	0.173	0.188	0.185	0.218	1.868	0.173	0.865	120	521	3916	3329	-2.530	578	3338	527	2802	0
4	16	5	"YJL060W"	"YJL060W"	18570	14960	140	2554	2282	858	100	111	70	100	98	0	3640	2985	1470	40	86	314	91	87	0	0.682	0.741	0.721	0.870	1.819	0.683	0.901	156	584	6054	5127	-0.553	2454	3600	2182	2945	0
4	17	5	"HPR5"	"YJL092W"	18770	14960	140	4819	4575	1682	97	102	40	100	100	0	5782	5049	2306	40	41	24	100	100	0	0.822	0.894	0.847	1.032	1.713	0.843	0.923	156	538	10464	9487	-0.282	4722	5742	4478	5009	0
4	18	5	"LSM1"	"YJL124C"	18970	14960	140	817	782	289	100	103	32	99	97	0	4488	3915	1804	41	41	20	98	98	0	0.161	0.176	0.173	0.192	1.794	0.161	0.870	156	499	5164	4556	-2.633	717	4447	682	3874	0
4	19	5	"LAS21"	"YJL062W"	19160	14960	140	1847	1763	651	107	114	44	99	98	0	6388	5584	2597	48	61	53	100	98	0	0.274	0.299	0.279	0.335	1.826	0.270	0.885	156	550	8080	7192	-1.865	1740	6340	1656	5536	0
4	20	5	"YJL094C"	"YJL094C"	19370	14960	140	4653	5060	2504	108	120	62	100	100	0	5148	5140	2257	55	75	101	99	99	0	0.892	0.974	0.900	1.025	1.628	1.003	0.877	156	560	9638	10037	-0.164	4545	5093	4952	5085	0
4	21	5	"NIT2"	"YJL126W"	19560	14950	140	4001	3739	1162	104	113	55	100	100	0	7123	6180	2446	45	59	87	99	99	0	0.551	0.593	0.572	0.654	1.539	0.562	0.926	156	664	10975	9770	-0.861	3897	7078	3635	6135	0
4	1	6	"YJL064W"	"YJL064W"	15550	15150	140	516	516	166	100	105	38	99	98	0	1975	1799	738	37	39	26	98	98	0	0.215	0.236	0.227	0.257	1.766	0.217	0.844	156	693	2354	2178	-2.220	416	1938	416	1762	0
4	2	6	"MRPL49"	"YJL096W"	15750	15150	140	1376	1328	410	101	105	37	100	100	0	3337	3036	1258	39	45	72	97	97	0	0.387	0.409	0.408	0.466	1.684	0.382	0.923	156	570	4573	4224	-1.371	1275	3298	1227	2997	0
4	3	6	"PBS2"	"YJL128C"	15960	15150	140	956	944	367	97	103	35	98	97	0	4153	3984	1702	41	47	74	96	96	0	0.209	0.215	0.207	0.235	1.682	0.211	0.878	156	679	4971	4790	-2.259	859	4112	847	3943	0
4	4	6	"YKL054C"	"YKL054C"	16160	15150	140	147	155	54	98	102	31	67	37	0	173	205	116	40	40	18	94	92	0	0.368	0.345	0.372	0.325	2.922	0.313	0.305	156	612	182	222	-1.441	49	133	57	165	0
4	5	6	"YKL086W"	"YKL086W"	16370	15150	150	1081	1283	706	100	104	33	100	100	0	2249	2460	1453	40	40	18	99	98	0	0.444	0.489	0.482	0.553	1.838	0.464	0.857	156	600	3190	3603	-1.171	981	2209	1183	2420	0
4	6	6	"SBA1"	"YKL117W"	16570	15150	140	1771	1978	1133	99	102	33	99	99	0	1552	1647	994	39	40	18	98	97	0	1.105	1.169	1.165	1.276	1.570	1.157	0.898	156	546	3185	3487	0.144	1672	1513	1879	1608	0
4	7	6	"YKL056C"	"YKL056C"	16770	15160	140	506	501	194	104	125	128	91	75	0	1230	1111	526	42	60	114	94	89	0	0.338	0.371	0.364	0.397	1.742	0.348	0.826	156	508	1590	1466	-1.563	402	1188	397	1069	0
4	8	6	"YKL088W"	"YKL088W"	16960	15150	150	2316	2409	1124	106	128	126	99	97	0	5688	5552	2253	42	60	113	97	97	0	0.391	0.418	0.409	0.436	1.583	0.420	0.906	156	525	7856	7813	-1.353	2210	5646	2303	5510	0
4	9	6	"VPH2"	"YKL119C"	17170	15150	140	1807	1716	653	104	107	42	99	99	0	2319	2060	903	40	42	23	98	97	0	0.747	0.798	0.796	0.896	1.624	0.782	0.896	156	541	3982	3632	-0.420	1703	2279	1612	2020	0
4	10	6	"TOA2"	"YKL058W"	17360	15160	150	1668	1577	636	103	108	40	98	96	0	2988	2585	1213	40	43	26	98	97	0	0.531	0.579	0.590	0.636	1.698	0.552	0.912	156	575	4513	4019	-0.914	1565	2948	1474	2545	0
4	11	6	"YKL090W"	"YKL090W"	17570	15150	150	308	324	142	103	109	35	94	89	0	983	1015	476	38	43	25	98	96	0	0.217	0.226	0.218	0.220	1.987	0.199	0.633	156	594	1150	1198	-2.205	205	945	221	977	0
4	12	6	"YKL121W"	"YKL121W"	17770	15150	150	298	314	128	100	104	33	95	91	0	954	978	491	38	40	20	97	96	0	0.216	0.228	0.232	0.236	1.829	0.214	0.762	156	532	1114	1154	-2.210	198	916	214	940	0
4	13	6	"FBA1"	"YKL060C"	17960	15150	150	1542	1735	970	101	104	32	100	100	0	1787	1756	922	40	42	59	96	93	0	0.825	0.952	0.913	1.006	1.518	0.976	0.872	156	541	3188	3350	-0.278	1441	1747	1634	1716	0
4	14	6	"BUD2"	"YKL092C"	18160	15150	140	1180	1264	576	100	104	31	100	100	0	2279	2213	896	38	41	58	98	97	0	0.482	0.535	0.527	0.570	1.710	0.532	0.852	156	573	3321	3339	-1.053	1080	2241	1164	2175	0
4	15	6	"YKL123W"	"YKL123W"	18370	15150	140	1200	1137	383	99	108	63	100	98	0	2155	2008	710	38	76	297	95	91	0	0.520	0.527	0.522	0.536	1.528	0.515	0.896	156	549	3218	3008	-0.943	1101	2117	1038	1970	0
4	16	6	"RIC1"	"YLR039C"	18570	15150	140	470	476	191	99	107	58	94	87	0	1230	1241	545	39	62	229	92	87	0	0.312	0.314	0.314	0.317	1.656	0.307	0.858	156	503	1562	1579	-1.683	371	1191	377	1202	0
4	17	6	"RGR1"	"YLR071C"	18770	15150	150	287	320	133	99	103	34	94	89	0	781	815	465	39	39	20	96	96	0	0.253	0.285	0.281	0.293	1.953	0.261	0.760	156	519	930	997	-1.981	188	742	221	776	0
4	18	6	"CDC45"	"YLR103C"	18970	15150	140	1051	1142	552	100	103	33	99	98	0	1552	1598	873	41	42	22	99	97	0	0.629	0.669	0.672	0.767	1.739	0.647	0.896	156	454	2462	2599	-0.668	951	1511	1042	1557	0
4	19	6	"YLR041W"	"YLR041W"	19160	15150	150	1622	1572	491	105	112	62	100	98	0	2476	2250	742	45	51	38	98	98	0	0.624	0.665	0.660	0.699	1.517	0.654	0.928	156	489	3948	3672	-0.680	1517	2431	1467	2205	0
4	20	6	"YLR073C"	"YLR073C"	19370	15150	140	583	593	244	107	119	76	94	91	0	1220	1174	514	48	59	57	97	94	0	0.406	0.432	0.419	0.448	1.651	0.422	0.817	156	530	1648	1612	-1.300	476	1172	486	1126	0
4	21	6	"SEN2"	"YLR105C"	19570	15150	140	3325	3173	995	103	113	60	100	100	0	4925	4578	1502	43	51	52	100	100	0	0.660	0.677	0.671	0.699	1.509	0.668	0.930	156	710	8104	7605	-0.600	3222	4882	3070	4535	0
4	1	7	"TRX1"	"YLR043C"	15560	15350	150	892	863	319	101	106	36	98	97	0	1329	1224	543	37	39	26	98	95	0	0.612	0.642	0.644	0.689	1.436	0.609	0.899	156	758	2083	1949	-0.708	791	1292	762	1187	0
4	2	7	"RPL10"	"YLR075W"	15760	15350	150	602	571	204	102	106	38	98	92	0	1847	1640	722	38	44	70	96	91	0	0.276	0.293	0.297	0.320	1.649	0.277	0.861	156	611	2309	2071	-1.855	500	1809	469	1602	0
4	3	7	"YLR107W"	"YLR107W"	15970	15360	140	462	461	190	100	103	34	96	94	0	1575	1399	692	40	45	73	93	92	0	0.236	0.266	0.257	0.290	1.871	0.225	0.703	156	580	1897	1720	-2.084	362	1535	361	1359	0
4	4	7	"STU2"	"YLR045C"	16170	15350	140	2425	2259	906	101	104	34	100	100	0	6824	5947	2623	40	42	32	100	100	0	0.343	0.365	0.365	0.393	1.500	0.353	0.938	156	576	9108	8065	-1.546	2324	6784	2158	5907	0
4	5	7	"YLR077W"	"YLR077W"	16370	15350	130	2158	2136	1027	102	106	40	98	98	0	3651	3447	2033	40	42	29	98	98	0	0.569	0.597	0.601	0.674	1.546	0.540	0.922	120	532	5667	5441	-0.813	2056	3611	2034	3407	0
4	6	7	"AHP1"	"YLR109W"	16570	15350	140	851	816	293	100	103	38	99	98	0	1988	1842	797	40	41	29	98	97	0	0.386	0.397	0.388	0.432	1.586	0.378	0.891	156	549	2699	2518	-1.375	751	1948	716	1802	0
4	7	7	"YLR422W"	"YLR422W"	16770	15350	140	341	342	125	100	103	33	96	90	0	645	705	368	39	39	19	97	96	0	0.398	0.363	0.351	0.394	2.239	0.325	0.788	156	487	847	908	-1.330	241	606	242	666	0
4	8	7	"YLR454W"	"YLR454W"	16960	15340	130	339	383	175	101	105	35	98	95	0	694	748	464	39	40	24	97	97	0	0.363	0.398	0.370	0.423	2.101	0.354	0.745	120	473	893	991	-1.461	238	655	282	709	0
4	9	7	"PPZ1"	"YML016C"	17160	15350	140	2851	2996	1467	102	105	34	100	100	0	3110	3087	1575	38	59	392	91	88	0	0.895	0.949	0.944	1.071	1.733	0.937	0.936	156	513	5821	5943	-0.160	2749	3072	2894	3049	0
4	10	7	"YLR424W"	"YLR424W"	17360	15350	140	3023	3096	1327	102	105	34	98	98	0	5071	4857	2314	40	42	24	99	98	0	0.581	0.622	0.630	0.675	1.516	0.595	0.904	156	490	7952	7811	-0.784	2921	5031	2994	4817	0
4	11	7	"YLR456W"	"YLR456W"	17560	15350	140	1191	1131	408	101	107	46	98	98	0	2865	2530	1139	38	42	24	98	96	0	0.386	0.413	0.411	0.479	1.715	0.381	0.911	156	527	3917	3522	-1.375	1090	2827	1030	2492	0
4	12	7	"YML018C"	"YML018C"	17770	15350	140	3225	2971	1250	99	104	45	100	99	0	2977	2805	1409	38	40	20	98	96	0	1.064	1.038	1.028	1.175	1.575	0.991	0.931	156	513	6065	5639	0.089	3126	2939	2872	2767	0
4	13	7	"YLR426W"	"YLR426W"	17960	15350	150	1511	1578	764	100	104	39	100	100	0	4436	3996	1735	40	42	60	98	98	0	0.321	0.374	0.349	0.401	1.674	0.370	0.892	156	537	5807	5434	-1.639	1411	4396	1478	3956	0
4	14	7	"YLR458W"	"YLR458W"	18180	15350	140	701	659	291	99	104	41	97	92	0	2285	2019	1096	39	42	58	93	91	0	0.268	0.283	0.275	0.346	2.119	0.256	0.836	156	580	2848	2540	-1.900	602	2246	560	1980	0
4	15	7	"YML020W"	"YML020W"	18390	15340	140	2085	2048	835	98	101	36	99	99	0	4073	3690	1657	38	46	109	98	96	0	0.492	0.534	0.524	0.586	1.639	0.515	0.915	156	505	6022	5602	-1.022	1987	4035	1950	3652	0
4	16	7	"YLR428C"	"YLR428C"	18570	15340	150	526	524	171	99	102	32	99	96	0	3587	3232	1188	39	45	106	99	97	0	0.120	0.133	0.126	0.139	1.773	0.122	0.814	156	534	3975	3618	-3.055	427	3548	425	3193	0
4	17	7	"YLR460C"	"YLR460C"	18790	15340	150	1858	1843	762	102	105	34	98	96	0	4882	4514	2059	39	40	21	98	97	0	0.363	0.389	0.375	0.415	1.617	0.375	0.916	156	578	6599	6216	-1.464	1756	4843	1741	4475	0
4	18	7	"APT1"	"YML022W"	18990	15340	140	1277	1185	458	100	105	37	98	96	0	2667	2266	1073	39	41	20	98	97	0	0.448	0.487	0.484	0.555	1.673	0.453	0.908	156	499	3805	3312	-1.159	1177	2628	1085	2227	0
4	19	7	"HSC82"	"YMR186W"	19170	15350	150	455	508	238	99	107	62	98	94	0	836	942	505	38	40	23	98	97	0	0.446	0.452	0.443	0.463	1.609	0.438	0.872	156	486	1154	1313	-1.165	356	798	409	904	0
4	20	7	"GUA1"	"YMR217W"	19360	15340	140	661	734	362	102	110	63	98	96	0	1499	1524	863	41	44	28	98	97	0	0.383	0.426	0.425	0.468	1.760	0.409	0.908	156	500	2017	2115	-1.383	559	1458	632	1483	0
4	21	7	"YMR250W"	"YMR250W"	19570	15340	130	431	462	193	104	109	47	97	96	0	709	692	333	42	48	41	99	96	0	0.490	0.551	0.534	0.582	1.877	0.539	0.819	120	598	994	1008	-1.028	327	667	358	650	0
4	1	8	"YMR188C"	"YMR188C"	15560	15550	150	475	509	193	101	104	32	98	98	0	973	963	434	37	60	446	85	57	0	0.400	0.441	0.425	0.463	1.695	0.405	0.810	156	779	1310	1334	-1.323	374	936	408	926	0
4	2	8	"ESC1"	"YMR219W"	15770	15540	120	146	153	55	102	106	35	56	28	0	134	150	79	38	39	18	91	85	0	0.458	0.455	0.486	0.466	2.557	0.530	0.285	120	468	140	163	-1.126	44	96	51	112	0
4	3	8	"HOR7"	"YMR251W-A"	15970	15550	140	1487	1593	778	98	104	34	100	99	0	3522	3319	1586	39	43	35	99	99	0	0.399	0.456	0.447	0.475	1.650	0.446	0.887	156	532	4872	4775	-1.326	1389	3483	1495	3280	0
4	4	8	"SGS1"	"YMR190C"	16190	15540	140	341	370	166	99	104	34	96	94	0	423	438	232	39	43	34	96	91	0	0.630	0.679	0.671	0.688	2.148	0.658	0.761	156	556	626	670	-0.666	242	384	271	399	0
4	5	8	"YMR221C"	"YMR221C"	16400	15550	150	319	325	160	100	105	40	91	85	0	362	338	195	39	42	30	88	82	0	0.678	0.753	0.749	0.806	2.042	0.733	0.725	156	538	542	524	-0.561	219	323	225	299	0
4	6	8	"YMR253C"	"YMR253C"	16600	15550	140	214	232	95	99	104	44	84	61	0	385	414	249	39	41	32	93	87	0	0.332	0.355	0.335	0.369	2.403	0.308	0.604	156	462	461	508	-1.589	115	346	133	375	0
4	7	8	"YMR192W"	"YMR192W"	16780	15540	140	210	237	112	101	106	40	83	67	0	412	461	249	39	40	32	97	94	0	0.292	0.322	0.313	0.292	2.471	0.319	0.634	156	484	482	558	-1.775	109	373	136	422	0
4	8	8	"UBP8"	"YMR223W"	16980	15530	150	812	862	437	101	105	33	99	99	0	1678	1695	942	39	58	373	89	81	0	0.434	0.460	0.448	0.497	1.760	0.388	0.759	156	569	2350	2417	-1.205	711	1639	761	1656	0
4	9	8	"GFD1"	"YMR255W"	17190	15530	140	1493	1455	599	101	106	39	99	99	0	2195	2019	952	39	58	375	90	85	0	0.646	0.684	0.681	0.729	1.495	0.601	0.806	156	559	3548	3334	-0.631	1392	2156	1354	1980	0
4	10	8	"LAP3"	"YNL239W"	17400	15540	140	1186	1137	319	102	106	39	100	100	0	5069	4397	1685	40	41	22	100	100	0	0.216	0.238	0.232	0.261	1.651	0.217	0.900	156	518	6113	5392	-2.214	1084	5029	1035	4357	0
4	11	8	"BNI1"	"YNL271C"	17600	15540	140	249	285	137	98	104	45	91	75	0	514	519	315	38	40	21	95	93	0	0.317	0.389	0.342	0.403	2.240	0.348	0.659	156	554	627	668	-1.656	151	476	187	481	0
4	12	8	"YNL303W"	"YNL303W"	17800	15530	130	384	394	149	99	103	34	97	93	0	805	805	425	37	38	17	97	95	0	0.371	0.384	0.381	0.412	1.731	0.347	0.803	120	489	1053	1063	-1.430	285	768	295	768	0
4	13	8	"ZWF1"	"YNL241C"	17990	15540	140	3079	3232	1416	101	105	40	100	100	0	2630	2394	871	38	49	113	98	95	0	1.149	1.329	1.246	1.385	1.580	1.406	0.868	156	567	5570	5487	0.200	2978	2592	3131	2356	0
4	14	8	"TOF1"	"YNL273W"	18190	15540	140	613	676	347	100	104	43	98	96	0	800	843	453	38	40	23	98	96	0	0.673	0.716	0.700	0.752	1.817	0.705	0.821	156	555	1275	1381	-0.571	513	762	576	805	0
4	15	8	"YNL305C"	"YNL305C"	18390	15540	140	773	744	234	99	101	38	99	96	0	3159	2784	1082	38	42	55	98	96	0	0.216	0.235	0.232	0.252	1.664	0.217	0.881	156	523	3795	3391	-2.211	674	3121	645	2746	0
4	16	8	"SLA2"	"YNL243W"	18590	15540	140	1105	1060	339	98	100	35	99	98	0	4537	4029	1637	39	41	54	98	98	0	0.224	0.241	0.236	0.274	1.796	0.221	0.886	156	529	5505	4952	-2.159	1007	4498	962	3990	0
4	17	8	"YNL275W"	"YNL275W"	18790	15540	140	3963	3725	1297	102	108	49	100	100	0	4683	4116	1688	39	45	54	99	99	0	0.831	0.889	0.873	0.965	1.541	0.850	0.921	156	533	8505	7700	-0.266	3861	4644	3623	4077	0
4	18	8	"MCK1"	"YNL307C"	18990	15550	140	703	670	221	102	108	47	97	96	0	4315	3702	1507	40	45	53	98	98	0	0.141	0.155	0.149	0.168	1.767	0.141	0.855	156	561	4876	4230	-2.830	601	4275	568	3662	0
4	19	8	"YNL245C"	"YNL245C"	19210	15530	140	759	727	202	100	107	40	100	98	0	4032	3538	1303	40	46	36	99	99	0	0.165	0.179	0.173	0.195	1.695	0.166	0.891	156	541	4651	4125	-2.599	659	3992	627	3498	0
4	20	8	"MET2"	"YNL277W"	19410	15530	140	1800	1816	771	99	105	35	100	100	0	5184	4559	1893	41	46	35	100	100	0	0.331	0.380	0.355	0.391	1.608	0.370	0.898	156	543	6844	6235	-1.596	1701	5143	1717	4518	0
4	21	8	"STB1"	"YNL309W"	19600	15530	140	3996	3561	1279	100	106	37	100	99	0	5656	4796	2037	41	48	46	98	98	0	0.694	0.728	0.692	0.795	1.809	0.702	0.924	156	716	9511	8216	-0.527	3896	5615	3461	4755	0
4	1	9	"YOR041C"	"YOR041C"	15600	15730	150	1132	1079	392	101	104	36	99	98	0	3884	3375	1319	38	39	21	99	98	0	0.268	0.293	0.287	0.311	1.859	0.284	0.881	156	712	4877	4315	-1.899	1031	3846	978	3337	0
4	2	9	"YOR073W"	"YOR073W"	15790	15730	140	2421	2475	1100	101	104	38	100	100	0	5021	4736	2094	38	39	18	100	100	0	0.466	0.505	0.492	0.530	1.579	0.492	0.898	156	536	7303	7072	-1.103	2320	4983	2374	4698	0
4	3	9	"YOR105W"	"YOR105W"	15980	15730	140	1085	1025	288	99	103	34	100	100	0	4576	3933	1436	39	41	22	100	100	0	0.217	0.238	0.229	0.260	1.683	0.219	0.886	156	567	5523	4820	-2.202	986	4537	926	3894	0
4	4	9	"WHI2"	"YOR043W"	16190	15730	140	1198	1218	490	99	103	34	100	100	0	3371	3209	1446	39	41	23	100	99	0	0.330	0.353	0.330	0.382	1.733	0.330	0.865	156	563	4431	4289	-1.600	1099	3332	1119	3170	0
4	5	9	"UFE1"	"YOR075W"	16390	15730	140	3620	3731	1423	103	111	93	100	100	0	4262	4050	1768	39	41	34	100	100	0	0.833	0.905	0.908	0.982	1.571	0.883	0.884	156	507	7740	7639	-0.264	3517	4223	3628	4011	0
4	6	9	"YOR107W"	"YOR107W"	16580	15740	140	769	774	242	104	122	132	99	94	0	2814	2552	1003	40	51	80	98	98	0	0.240	0.267	0.254	0.283	1.694	0.240	0.749	156	552	3439	3182	-2.061	665	2774	670	2512	0
4	7	9	"TOM6"	"YOR045W"	16790	15730	140	1213	1133	356	100	110	87	100	97	0	838	782	335	38	44	57	94	92	0	1.391	1.388	1.385	1.612	1.840	1.344	0.899	156	561	1913	1777	0.476	1113	800	1033	744	0
4	8	9	"RTS2"	"YOR077W"	16990	15740	140	813	769	262	102	105	36	100	98	0	3012	2606	1170	38	40	30	99	98	0	0.239	0.260	0.256	0.292	1.779	0.239	0.883	156	561	3685	3235	-2.064	711	2974	667	2568	0
4	9	9	"INP53"	"YOR109W"	17180	15740	140	808	815	340	102	107	41	100	99	0	2530	2487	1270	40	41	21	100	100	0	0.284	0.291	0.292	0.319	1.844	0.265	0.859	156	606	3196	3160	-1.818	706	2490	713	2447	0
4	10	9	"STD1"	"YOR047C"	17400	15740	150	2243	2051	846	106	108	38	99	99	0	5012	4402	2158	40	40	21	99	99	0	0.430	0.446	0.437	0.496	1.794	0.424	0.883	156	651	7109	6307	-1.218	2137	4972	1945	4362	0
4	11	9	"ATX2"	"YOR079C"	17570	15730	130	1081	1115	444	102	106	34	99	98	0	2715	2481	1173	39	39	19	100	99	0	0.366	0.415	0.415	0.449	1.569	0.376	0.877	120	518	3655	3455	-1.451	979	2676	1013	2442	0
4	12	9	"YOR111W"	"YOR111W"	17790	15740	130	571	569	275	99	104	39	99	96	0	1366	1339	823	37	41	59	94	93	0	0.355	0.361	0.362	0.402	1.766	0.328	0.844	120	645	1801	1772	-1.493	472	1329	470	1302	0
4	13	9	"YPL030W"	"YPL030W"	17980	15720	110	603	675	401	102	116	82	96	90	0	1639	1733	1408	38	85	268	81	68	0	0.313	0.338	0.357	0.440	2.242	0.265	0.731	80	480	2102	2268	-1.676	501	1601	573	1695	0
4	14	9	"YPL062W"	"YPL062W"	18190	15730	130	230	219	89	98	109	69	68	45	0	855	801	601	38	66	210	69	61	0	0.162	0.159	0.166	0.207	2.880	0.130	0.622	120	592	949	884	-2.630	132	817	121	763	0
4	15	9	"SEC62"	"YPL094C"	18390	15730	140	1811	2163	2703	97	100	33	92	89	0	3871	3216	2406	38	39	20	91	87	0	0.447	0.650	0.494	0.707	2.568	0.854	0.624	156	592	5547	5244	-1.161	1714	3833	2066	3178	0
4	16	9	"SVL3"	"YPL032C"	18600	15730	140	1965	1971	975	98	105	56	98	96	0	3668	3480	1696	38	41	30	98	97	0	0.514	0.544	0.535	0.556	1.734	0.541	0.875	156	553	5497	5315	-0.959	1867	3630	1873	3442	0
4	17	9	"YPL064C"	"YPL064C"	18790	15740	140	926	901	357	102	115	60	100	98	0	1935	1839	917	40	65	104	96	93	0	0.435	0.444	0.450	0.498	1.850	0.409	0.859	156	499	2719	2598	-1.201	824	1895	799	1799	0
4	18	9	"YPL096W"	"YPL096W"	18970	15740	140	3280	3151	887	105	115	55	100	100	0	6264	5551	1894	42	66	105	99	99	0	0.510	0.553	0.534	0.592	1.569	0.526	0.899	156	491	9397	8555	-0.971	3175	6222	3046	5509	0
4	19	9	"YPL034W"	"YPL034W"	19180	15740	140	3500	3180	1026	102	106	42	100	100	0	3554	3092	1157	41	49	49	100	98	0	0.967	1.009	0.992	1.086	1.678	0.994	0.922	156	597	6911	6129	-0.048	3398	3513	3078	3051	0
4	20	9	"YPL066W"	"YPL066W"	19390	15740	140	1783	1816	675	100	110	89	100	99	0	6709	6118	2279	42	54	59	100	100	0	0.252	0.282	0.264	0.305	1.655	0.274	0.882	156	619	8350	7792	-1.986	1683	6667	1716	6076	0
4	21	9	"YPL098C"	"YPL098C"	19600	15740	140	1074	1023	417	99	106	80	97	91	0	2907	2579	1236	41	45	38	98	96	0	0.340	0.364	0.369	0.410	2.079	0.340	0.881	156	728	3841	3462	-1.556	975	2866	924	2538	0
4	1	10	"PMA2"	"YPL036W"	15590	15940	140	634	688	364	99	104	47	100	95	0	1166	1267	736	38	40	27	98	97	0	0.474	0.479	0.458	0.515	1.748	0.458	0.834	156	750	1663	1818	-1.076	535	1128	589	1229	0
4	2	10	"YPL068C"	"YPL068C"	15780	15930	130	3036	2886	989	98	104	44	100	100	0	3477	3141	1242	39	40	22	100	100	0	0.855	0.899	0.892	0.964	1.417	0.876	0.933	120	586	6376	5890	-0.227	2938	3438	2788	3102	0
4	3	10	"YPL100W"	"YPL100W"	15990	15930	120	169	201	104	100	104	33	72	51	0	155	181	117	39	40	23	93	85	0	0.595	0.711	0.627	0.612	2.796	0.747	0.389	120	569	185	243	-0.749	69	116	101	142	0
4	4	10	"NAT3"	"YPR131C"	16200	15930	140	748	754	272	100	105	38	99	99	0	1378	1322	565	39	40	20	99	99	0	0.484	0.510	0.514	0.545	1.597	0.488	0.861	156	603	1987	1937	-1.047	648	1339	654	1283	0
4	5	10	"TIF3"	"YPR163C"	16390	15940	140	528	544	183	101	111	91	99	96	0	2136	2152	913	38	42	37	100	99	0	0.204	0.210	0.205	0.224	1.674	0.194	0.869	156	561	2525	2557	-2.297	427	2098	443	2114	0
4	6	10	"YPR195C"	"YPR195C"	16590	15950	130	279	285	126	99	112	104	72	41	0	422	420	273	38	47	63	80	75	0	0.469	0.487	0.477	0.544	2.036	0.556	0.496	120	559	564	568	-1.093	180	384	186	382	0
4	7	10	"YPR133C"	"YPR133C"	16790	15930	130	218	219	84	101	108	81	65	26	0	379	381	225	38	43	51	89	80	0	0.343	0.344	0.347	0.351	2.451	0.419	0.415	120	579	458	461	-1.543	117	341	118	343	0
4	8	10	"RHO1"	"YPR165W"	16990	15940	150	1277	1204	472	102	105	34	98	96	0	2764	2444	1079	37	40	22	97	96	0	0.431	0.458	0.459	0.503	1.575	0.445	0.927	156	561	3902	3509	-1.215	1175	2727	1102	2407	0
4	9	10	"YPR197C"	"YPR197C"	17180	15940	140	1684	1665	568	101	105	35	100	100	0	5367	4875	2093	38	41	23	100	100	0	0.297	0.323	0.316	0.357	1.584	0.303	0.936	156	543	6912	6401	-1.751	1583	5329	1564	4837	0
4	10	10	"CTF4"	"YPR135W"	17360	15930	80	140	158	69	104	108	35	50	32	0	94	118	101	39	44	31	57	46	0	0.655	0.684	0.691	0.631	2.579	0.551	0.346	52	302	91	133	-0.611	36	55	54	79	0
4	11	10	"MET16"	"YPR167C"	17570	15940	150	113	122	48	102	105	33	32	14	0	49	66	64	38	40	23	33	17	0	1.000	0.714	1.033	1.191	4.381	1.229	0.066	156	714	22	48	0.000	11	11	20	28	-50
4	12	10	"ARR1"	"YPR199C"	17790	15940	140	1012	962	316	97	104	40	99	99	0	4329	3715	1517	37	38	25	100	99	0	0.213	0.235	0.236	0.258	1.606	0.221	0.927	156	589	5207	4543	-2.230	915	4292	865	3678	0
4	13	10	"RRP9"	"YPR137W"	17970	15940	150	123	134	59	98	112	74	16	4	0	52	87	114	37	65	205	8	1	0	1.667	0.720	1.000	1.218	4.041	0.256	0.341	156	673	40	86	0.737	25	15	36	50	-50
4	14	10	"YPR169W"	"YPR169W"	18190	15940	140	1674	1594	534	97	103	32	100	100	0	5541	4978	2089	38	41	25	99	99	0	0.287	0.303	0.303	0.342	1.693	0.285	0.934	156	735	7080	6437	-1.803	1577	5503	1497	4940	0
4	15	10	"ARR3"	"YPR201W"	18400	15940	140	1389	1335	481	99	105	67	98	96	0	5568	4822	2026	39	44	82	96	94	0	0.233	0.258	0.255	0.293	1.692	0.244	0.911	156	621	6819	6019	-2.100	1290	5529	1236	4783	0
4	16	10	"CEN1"	"CEN1"	18590	15940	140	281	289	92	101	109	81	91	59	0	587	580	248	40	61	266	85	52	0	0.329	0.348	0.338	0.349	1.909	0.165	0.304	156	600	727	728	-1.604	180	547	188	540	0
4	17	10	"YBL091C-A"	"YBL091C-A"	18800	15930	130	1039	1028	299	103	111	47	100	100	0	1528	1375	506	41	75	280	92	89	0	0.629	0.693	0.678	0.758	1.577	0.671	0.919	120	538	2423	2259	-0.668	936	1487	925	1334	0
4	18	10	"YBLWdelta8"	"YBLWdelta8"	19000	15930	140	338	336	102	103	109	44	97	91	0	577	586	511	42	57	84	94	88	0	0.439	0.428	0.453	0.482	1.877	0.222	0.397	156	597	770	777	-1.187	235	535	233	544	0
4	19	10	"YCRCtau1"	"YCRCtau1"	19200	15930	130	188	194	72	102	103	32	80	65	0	214	232	104	41	48	48	94	86	0	0.497	0.482	0.463	0.433	2.360	0.484	0.474	120	502	259	283	-1.008	86	173	92	191	0
4	20	10	"SNR189"	"SNR189"	19390	15940	140	190	199	63	98	105	86	57	12	0	560	538	176	42	49	52	97	96	0	0.178	0.204	0.188	0.195	2.357	0.240	0.250	156	604	610	597	-2.493	92	518	101	496	0
4	21	10	"YCRWomega3"	"YCRWomega3"	19610	15940	140	1485	1450	410	99	105	80	100	98	0	2123	1951	679	41	43	32	99	99	0	0.666	0.707	0.696	0.755	1.472	0.682	0.921	156	719	3468	3261	-0.587	1386	2082	1351	1910	0
4	1	11	"IntYDR064W"	"IntYDR064W"	15590	16140	140	284	300	110	98	103	44	96	89	0	1324	1216	488	38	39	27	98	96	0	0.145	0.171	0.169	0.180	1.990	0.152	0.630	156	729	1472	1380	-2.790	186	1286	202	1178	0
4	2	11	"YDRWsigma4"	"YDRWsigma4"	15790	16140	130	203	206	65	99	106	55	74	41	0	280	289	126	39	41	25	94	92	0	0.432	0.428	0.413	0.401	2.126	0.411	0.344	120	572	345	357	-1.212	104	241	107	250	0
4	3	11	"tG(CCC)D"	"tG(CCC)D"	15980	16140	130	201	240	167	100	106	52	83	48	0	215	233	126	39	40	21	99	97	0	0.574	0.722	0.563	0.588	2.498	1.077	0.428	120	624	277	334	-0.801	101	176	140	194	0
4	4	11	"YERWdelta12"	"YERWdelta12"	16190	16130	130	464	468	161	99	105	48	98	96	0	1626	1460	519	39	41	23	99	99	0	0.230	0.260	0.244	0.264	1.634	0.233	0.763	120	590	1952	1790	-2.120	365	1587	369	1421	0
4	5	11	"IntYER133W"	"IntYER133W"	16390	16130	140	623	620	196	100	106	48	98	96	0	2796	2443	973	38	40	22	100	99	0	0.190	0.216	0.212	0.233	1.630	0.199	0.863	156	600	3281	2925	-2.399	523	2758	520	2405	0
4	6	11	"YERCdelta26"	"YERCdelta26"	16590	16130	130	692	706	246	97	101	32	99	99	0	2579	2414	982	38	45	89	99	98	0	0.234	0.256	0.246	0.265	1.456	0.236	0.878	120	563	3136	2985	-2.094	595	2541	609	2376	0
4	7	11	"iYAR044W-2"	"iYAR044W-2"	16800	16130	120	208	229	91	99	104	36	92	78	0	336	343	146	38	47	95	90	80	0	0.366	0.426	0.368	0.403	2.280	0.384	0.493	120	555	407	435	-1.451	109	298	130	305	0
4	8	11	"iYAR050W"	"iYAR050W"	17000	16130	140	1394	1367	446	100	104	34	100	99	0	2726	2509	889	38	40	35	100	100	0	0.481	0.513	0.513	0.531	1.425	0.498	0.929	156	562	3982	3738	-1.055	1294	2688	1267	2471	0
4	9	11	"iYARCdelta8-2"	"iYARCdelta8-2"	17210	16130	140	197	212	82	101	104	30	87	73	0	256	270	118	38	40	21	98	96	0	0.440	0.478	0.467	0.436	2.476	0.466	0.491	156	531	314	343	-1.183	96	218	111	232	0
4	10	11	"iYBLWdelta3"	"iYBLWdelta3"	17390	16130	140	449	453	171	101	103	31	97	94	0	769	714	344	38	41	25	96	93	0	0.476	0.521	0.513	0.534	1.634	0.489	0.844	156	591	1079	1028	-1.071	348	731	352	676	0
4	11	11	"iYBL105C"	"iYBL105C"	17600	16140	140	3091	3068	1142	99	102	31	100	100	0	4397	3888	1545	37	38	16	100	100	0	0.686	0.771	0.769	0.804	1.495	0.754	0.915	156	548	7352	6820	-0.543	2992	4360	2969	3851	0
4	12	11	"iYBL101C"	"iYBL101C"	17790	16140	140	1004	1002	312	97	103	41	100	99	0	4977	4440	1559	37	39	26	100	100	0	0.184	0.206	0.200	0.221	1.563	0.192	0.888	156	536	5847	5308	-2.445	907	4940	905	4403	0
4	13	11	"iYBL085W"	"iYBL085W"	17990	16140	140	1825	1892	847	98	104	42	100	100	0	2289	2276	1051	38	41	30	99	98	0	0.767	0.802	0.781	0.861	1.543	0.788	0.906	156	592	3978	4032	-0.382	1727	2251	1794	2238	0
4	14	11	"iYBL080C"	"iYBL080C"	18190	16150	110	444	445	147	99	105	37	100	96	0	1919	1841	822	40	42	24	100	98	0	0.184	0.192	0.190	0.205	1.666	0.175	0.818	80	485	2224	2147	-2.445	345	1879	346	1801	0
4	15	11	"iYBL075C"	"iYBL075C"	18400	16140	130	1731	1696	529	99	106	71	100	100	0	5479	4691	1748	39	44	84	100	100	0	0.300	0.343	0.336	0.360	1.418	0.327	0.886	120	585	7072	6249	-1.737	1632	5440	1597	4652	0
4	16	11	"iYBL056W"	"iYBL056W"	18600	16140	140	565	573	239	101	105	70	98	94	0	1252	1165	567	39	59	275	89	80	0	0.383	0.419	0.415	0.451	1.820	0.346	0.681	156	561	1677	1598	-1.386	464	1213	472	1126	0
4	17	11	"iYBL051C"	"iYBL051C"	18790	16140	140	862	832	277	102	102	30	99	99	0	4125	3584	1474	39	55	258	98	93	0	0.186	0.206	0.205	0.219	1.525	0.194	0.913	156	579	4846	4275	-2.427	760	4086	730	3545	0
4	18	11	"iYBL046W"	"iYBL046W"	18980	16140	140	569	591	241	101	102	31	98	98	0	1151	1151	517	39	39	17	99	98	0	0.421	0.441	0.437	0.445	1.619	0.430	0.866	156	635	1580	1602	-1.249	468	1112	490	1112	0
4	19	11	"iYBR250W"	"iYBR250W"	19210	16130	140	293	297	87	101	120	402	1	0	0	1065	974	373	40	57	388	89	73	0	0.187	0.210	0.209	0.217	1.618	0.655	0.623	156	658	1217	1130	-2.416	192	1025	196	934	0
4	20	11	"iYBR254C"	"iYBR254C"	19410	16130	130	820	902	446	101	103	32	100	100	0	1922	1797	673	42	42	20	100	100	0	0.382	0.456	0.425	0.467	1.678	0.455	0.828	120	556	2599	2556	-1.387	719	1880	801	1755	0
4	21	11	"iYBR259W"	"iYBR259W"	19610	16130	130	942	924	306	99	103	32	100	100	0	806	736	298	39	39	17	99	99	0	1.099	1.184	1.206	1.293	1.603	1.127	0.900	120	634	1610	1522	0.136	843	767	825	697	0
4	1	12	"iYBR279W"	"iYBR279W"	15600	16330	140	1458	1347	432	99	101	30	100	100	0	2110	1887	736	36	37	17	99	99	0	0.655	0.674	0.668	0.714	1.378	0.646	0.942	156	706	3433	3099	-0.610	1359	2074	1248	1851	0
4	2	12	"iYBR283C"	"iYBR283C"	15800	16340	140	564	569	165	102	105	37	100	99	0	3284	2970	1109	38	40	21	100	100	0	0.142	0.159	0.160	0.166	1.493	0.145	0.858	156	560	3708	3399	-2.813	462	3246	467	2932	0
4	3	12	"iYBR287W"	"iYBR287W"	15980	16340	130	401	403	93	100	104	37	100	98	0	846	784	257	39	41	22	99	98	0	0.373	0.407	0.395	0.435	1.681	0.367	0.807	120	538	1108	1048	-1.423	301	807	303	745	0
4	4	12	"iYCL075W"	"iYCL075W"	16190	16340	140	694	693	225	101	105	44	99	98	0	1949	1768	700	40	41	22	99	99	0	0.311	0.343	0.331	0.362	1.556	0.319	0.869	156	635	2502	2320	-1.687	593	1909	592	1728	0
4	5	12	"iYCL073C"	"iYCL073C"	16390	16340	140	3007	2953	920	101	106	44	100	100	0	5255	5012	1817	38	39	20	100	100	0	0.557	0.573	0.550	0.600	1.358	0.551	0.948	156	618	8123	7826	-0.844	2906	5217	2852	4974	0
4	6	12	"iYCL065W-0"	"iYCL065W-0"	16600	16320	130	1924	1951	648	102	104	33	100	100	0	2863	2674	960	38	45	87	98	98	0	0.645	0.701	0.697	0.748	1.487	0.687	0.943	120	597	4647	4485	-0.633	1822	2825	1849	2636	0
4	7	12	"iYCL047C"	"iYCL047C"	16800	16330	130	936	880	251	102	105	35	100	100	0	1570	1378	563	38	59	322	93	85	0	0.544	0.581	0.573	0.649	1.647	0.534	0.907	120	625	2366	2118	-0.877	834	1532	778	1340	0
4	8	12	"iYCL038C"	"iYCL038C"	16990	16330	140	429	438	133	100	104	35	98	98	0	850	820	316	38	54	316	89	67	0	0.405	0.432	0.438	0.456	1.686	0.410	0.848	156	607	1141	1120	-1.303	329	812	338	782	0
4	9	12	"iYCL033C"	"iYCL033C"	17190	16330	140	1739	1611	519	101	105	32	100	100	0	1957	1723	639	38	39	18	99	98	0	0.854	0.896	0.890	0.950	1.413	0.874	0.946	156	601	3557	3195	-0.228	1638	1919	1510	1685	0
4	10	12	"iYDL054C"	"iYDL054C"	17400	16330	140	824	768	260	100	104	32	99	98	0	2313	1979	888	38	38	16	99	99	0	0.318	0.344	0.337	0.386	1.751	0.319	0.890	156	607	2999	2609	-1.652	724	2275	668	1941	0
4	11	12	"iYDL049C"	"iYDL049C"	17600	16340	140	611	611	202	98	101	31	99	98	0	1824	1673	694	37	38	16	99	99	0	0.287	0.314	0.304	0.340	1.671	0.290	0.864	156	576	2300	2149	-1.801	513	1787	513	1636	0
4	12	12	"iYDL046W"	"iYDL046W"	17790	16330	130	2599	2410	802	98	102	32	100	100	0	2090	1838	797	38	40	29	99	99	0	1.219	1.284	1.273	1.434	1.553	1.210	0.927	120	551	4553	4112	0.285	2501	2052	2312	1800	0
4	13	12	"iYDL028C"	"iYDL028C"	18000	16340	140	894	863	320	100	106	37	99	98	0	1673	1504	688	39	41	30	99	99	0	0.486	0.521	0.509	0.560	1.612	0.492	0.910	156	583	2428	2228	-1.041	794	1634	763	1465	0
4	14	12	"itA(AGC)D"	"itA(AGC)D"	18170	16330	130	431	440	136	99	104	34	100	99	0	1637	1469	631	40	43	33	99	99	0	0.208	0.239	0.227	0.261	1.778	0.197	0.774	120	539	1929	1770	-2.266	332	1597	341	1429	0
4	15	12	"iYDL019C"	"iYDL019C"	18390	16340	140	1391	1334	350	100	104	34	100	99	0	3670	3303	1087	39	42	33	99	99	0	0.356	0.378	0.369	0.396	1.408	0.359	0.922	156	650	4922	4498	-1.492	1291	3631	1234	3264	0
4	16	12	"iYDL005C"	"iYDL005C"	18570	16330	130	3514	3379	1045	104	105	31	100	100	0	3424	3093	1118	39	41	30	99	99	0	1.007	1.072	1.047	1.186	1.631	1.029	0.939	120	505	6795	6329	0.011	3410	3385	3275	3054	0
4	17	12	"iYDL001W"	"iYDL001W"	18770	16340	140	2588	2419	831	104	107	32	100	100	0	1120	1036	434	39	42	34	97	96	0	2.298	2.322	2.349	2.521	1.506	2.292	0.930	156	580	3565	3312	1.200	2484	1081	2315	997	0
4	18	12	"iYDR003W"	"iYDR003W"	18990	16340	140	2052	1923	614	100	103	32	100	99	0	1359	1224	452	38	40	26	98	98	0	1.478	1.537	1.511	1.655	1.657	1.530	0.916	156	607	3273	3009	0.563	1952	1321	1823	1186	0
4	19	12	"iYDR020C"	"iYDR020C"	19190	16340	140	795	807	331	99	123	431	82	25	0	1474	1382	533	39	58	416	90	84	0	0.485	0.527	0.492	0.552	1.720	1.294	0.637	156	572	2131	2051	-1.044	696	1435	708	1343	0
4	20	12	"iYDR023W"	"iYDR023W"	19390	16340	140	389	391	109	102	126	434	7	0	0	483	452	170	42	62	420	53	0	0	0.651	0.705	0.691	0.769	1.837	0.664	0.790	156	564	728	699	-0.620	287	441	289	410	0
4	21	12	"iYDR028C"	"iYDR028C"	19580	16340	140	159	166	58	100	104	39	65	34	0	293	297	135	39	41	26	95	92	0	0.232	0.256	0.269	0.259	2.993	0.222	0.320	156	724	313	324	-2.106	59	254	66	258	0
4	1	13	"iYDR322W"	"iYDR322W"	15590	16540	140	670	662	239	99	102	31	100	98	0	1565	1458	653	36	38	18	99	98	0	0.373	0.396	0.398	0.426	1.655	0.371	0.855	156	735	2100	1985	-1.421	571	1529	563	1422	0
4	2	13	"iYDR326C"	"iYDR326C"	15790	16540	140	250	258	79	101	103	33	96	89	0	1252	1118	424	37	39	20	98	97	0	0.123	0.145	0.133	0.149	2.243	0.123	0.605	156	537	1364	1238	-3.028	149	1215	157	1081	0
4	3	13	"iYDR331W"	"iYDR331W"	15980	16540	140	143	156	72	102	104	36	54	23	0	333	312	113	39	75	582	0	0	0	0.139	0.198	0.179	0.188	2.649	0.010	0.014	156	566	335	327	-2.842	41	294	54	273	0
4	4	13	"iYDR345C-0"	"iYDR345C-0"	16190	16530	140	1666	1519	634	101	104	34	100	100	0	3685	3265	1472	39	74	582	88	84	0	0.429	0.440	0.428	0.482	1.761	0.389	0.816	156	567	5211	4644	-1.220	1565	3646	1418	3226	0
4	5	13	"iYDR348C"	"iYDR348C"	16390	16540	140	1209	1111	375	99	103	31	100	99	0	3158	2782	1185	38	39	18	100	99	0	0.356	0.369	0.363	0.404	1.564	0.345	0.919	156	537	4230	3756	-1.491	1110	3120	1012	2744	0
4	6	13	"iYDR350C"	"iYDR350C"	16590	16530	140	304	301	93	101	104	37	96	90	0	2502	2209	867	39	45	68	99	97	0	0.082	0.092	0.089	0.096	2.001	0.083	0.691	156	690	2666	2370	-3.601	203	2463	200	2170	0
4	7	13	"iYDR367W"	"iYDR367W"	16810	16550	100	384	376	142	104	107	35	95	90	0	1412	1212	606	38	68	389	81	76	0	0.204	0.232	0.244	0.269	1.848	0.200	0.775	80	413	1654	1446	-2.295	280	1374	272	1174	0
4	8	13	"iYDR371W"	"iYDR371W"	16990	16540	140	384	373	111	102	122	356	17	0	0	619	589	220	38	60	339	83	30	0	0.485	0.492	0.493	0.504	1.579	1.507	0.411	156	597	863	822	-1.043	282	581	271	551	0
4	9	13	"iYDR375C"	"iYDR375C"	17190	16540	140	256	257	70	100	121	355	0	0	0	1646	1514	688	38	45	121	93	91	0	0.097	0.106	0.100	0.117	2.228	0.165	0.079	156	601	1764	1633	-3.366	156	1608	157	1476	0
4	10	13	"itG(CCC)D"	"itG(CCC)D"	17390	16540	130	392	428	350	99	103	32	99	96	0	1291	1170	484	38	38	17	97	97	0	0.234	0.291	0.252	0.292	1.850	0.295	0.454	120	546	1546	1461	-2.096	293	1253	329	1132	0
4	11	13	"iYDR394W"	"iYDR394W"	17590	16540	140	283	287	94	98	101	29	97	93	0	1357	1254	617	37	38	17	100	99	0	0.140	0.155	0.153	0.176	2.187	0.130	0.699	156	601	1505	1406	-2.835	185	1320	189	1217	0
4	12	13	"iYDR399W"	"iYDR399W"	17790	16540	130	415	406	137	99	104	34	95	93	0	882	817	357	38	40	29	95	94	0	0.374	0.394	0.399	0.428	2.036	0.355	0.817	120	571	1160	1086	-1.417	316	844	307	779	0
4	13	13	"iYER056C-A"	"iYER056C-A"	17990	16540	140	554	571	231	100	106	36	98	96	0	1706	1549	653	39	40	23	98	98	0	0.272	0.312	0.301	0.323	1.609	0.292	0.821	156	575	2121	1981	-1.876	454	1667	471	1510	0
4	14	13	"iYER060W"	"iYER060W"	18190	16540	140	1596	1512	529	100	106	38	100	100	0	4080	3655	1524	38	42	34	100	98	0	0.370	0.390	0.386	0.422	1.572	0.371	0.913	156	581	5538	5029	-1.434	1496	4042	1412	3617	0
4	15	13	"iYER063W"	"iYER063W"	18380	16540	140	1262	1193	467	102	105	35	100	98	0	3494	3174	1412	38	39	19	98	98	0	0.336	0.348	0.334	0.386	1.624	0.332	0.919	156	637	4616	4227	-1.575	1160	3456	1091	3136	0
4	16	13	"itA(UGC)E"	"itA(UGC)E"	18610	16530	130	484	499	261	104	104	32	100	98	0	1257	1161	452	39	41	29	99	96	0	0.312	0.352	0.331	0.371	1.762	0.357	0.752	120	567	1598	1517	-1.680	380	1218	395	1122	0
4	17	13	"iYER078C"	"iYER078C"	18780	16540	140	820	790	251	100	104	32	98	98	0	3210	2770	1168	41	42	29	98	98	0	0.227	0.253	0.242	0.281	1.753	0.230	0.880	156	573	3889	3419	-2.138	720	3169	690	2729	0
4	18	13	"iYER082C"	"iYER082C"	18990	16540	140	604	581	202	99	104	33	98	96	0	2088	1891	691	40	42	28	99	98	0	0.247	0.260	0.249	0.265	1.702	0.246	0.843	156	629	2553	2333	-2.020	505	2048	482	1851	0
4	19	13	"iYER096W"	"iYER096W"	19200	16530	140	162	182	94	99	103	35	71	41	0	239	238	118	38	39	19	92	89	0	0.313	0.415	0.377	0.366	2.341	0.546	0.395	156	556	264	283	-1.674	63	201	83	200	0
4	20	13	"iYER098W"	"iYER098W"	19390	16540	140	2269	2160	693	101	107	70	100	99	0	3329	2962	1121	38	42	47	100	97	0	0.659	0.704	0.688	0.769	1.486	0.682	0.935	156	531	5459	4983	-0.602	2168	3291	2059	2924	0
4	21	13	"iYER102W"	"iYER102W"	19590	16540	140	6300	6110	2190	104	108	64	100	100	0	6519	5659	2001	38	42	42	100	100	0	0.956	1.068	1.056	1.119	1.445	1.076	0.905	156	711	12677	11627	-0.065	6196	6481	6006	5621	0
4	1	14	"iYER118C"	"iYER118C"	15590	16740	140	1194	1107	368	99	101	33	100	100	0	3120	2730	1074	36	38	18	100	100	0	0.355	0.374	0.370	0.399	1.502	0.354	0.907	156	728	4179	3702	-1.494	1095	3084	1008	2694	0
4	2	14	"iYER123W"	"iYER123W"	15790	16740	140	2071	1966	751	100	104	35	100	99	0	4817	4257	1719	37	38	16	100	100	0	0.412	0.442	0.444	0.464	1.474	0.426	0.921	156	585	6751	6086	-1.278	1971	4780	1866	4220	0
4	3	14	"iYER127W"	"iYER127W"	15990	16740	140	950	954	373	102	107	38	99	98	0	3052	2804	1137	38	72	571	92	87	0	0.281	0.308	0.297	0.323	1.591	0.298	0.899	156	588	3862	3618	-1.830	848	3014	852	2766	0
4	4	14	"iYGL200C"	"iYGL200C"	16200	16730	150	393	423	231	102	105	34	99	95	0	2094	1924	767	39	73	564	92	82	0	0.142	0.170	0.154	0.168	1.957	0.156	0.580	156	604	2346	2206	-2.820	291	2055	321	1885	0
4	5	14	"iYGL195W"	"iYGL195W"	16400	16730	140	1687	1633	461	100	102	31	100	100	0	1051	992	361	40	40	19	100	98	0	1.570	1.610	1.531	1.759	1.675	1.588	0.895	156	556	2598	2485	0.651	1587	1011	1533	952	0
4	6	14	"iYGL190C"	"iYGL190C"	16600	16740	140	522	521	155	95	99	35	98	96	0	2614	2326	960	38	40	36	98	97	0	0.166	0.186	0.186	0.211	1.885	0.166	0.840	156	603	3003	2714	-2.593	427	2576	426	2288	0
4	7	14	"iYGL176C"	"iYGL176C"	16800	16730	140	939	908	292	98	102	37	100	100	0	3065	2774	1036	38	44	72	98	98	0	0.278	0.296	0.291	0.320	1.674	0.282	0.914	156	558	3868	3546	-1.848	841	3027	810	2736	0
4	8	14	"iYGL172W"	"iYGL172W"	16980	16740	140	833	843	268	102	123	366	89	48	0	2098	1947	714	38	44	124	98	96	0	0.355	0.388	0.391	0.405	1.423	0.373	0.912	156	566	2791	2650	-1.495	731	2060	741	1909	0
4	9	14	"iYGL169W"	"iYGL169W"	17210	16730	140	434	433	122	99	122	366	39	0	0	826	763	255	38	44	124	98	92	0	0.425	0.461	0.453	0.473	1.568	0.442	0.833	156	564	1123	1059	-1.234	335	788	334	725	0
4	10	14	"iYGL152C"	"iYGL152C"	17390	16740	140	532	531	146	100	103	31	100	98	0	1510	1339	531	37	38	25	99	98	0	0.293	0.331	0.316	0.364	1.732	0.299	0.853	156	549	1905	1733	-1.770	432	1473	431	1302	0
4	11	14	"iYGL147C"	"iYGL147C"	17600	16730	140	456	467	169	98	101	32	98	95	0	2000	1839	696	37	38	24	98	98	0	0.182	0.205	0.200	0.209	1.648	0.197	0.854	156	603	2321	2171	-2.455	358	1963	369	1802	0
4	12	14	"iYGL143C"	"iYGL143C"	17810	16740	140	343	339	104	99	103	33	98	96	0	2695	2404	879	38	38	17	99	99	0	0.092	0.101	0.097	0.107	1.942	0.091	0.721	156	569	2901	2606	-3.445	244	2657	240	2366	0
4	13	14	"iYGL125W"	"iYGL125W"	17990	16740	140	485	595	314	101	105	35	99	98	0	527	577	295	38	39	21	98	98	0	0.785	0.917	0.841	0.882	1.644	0.959	0.837	156	566	873	1033	-0.349	384	489	494	539	0
4	14	14	"iYGL121C"	"iYGL121C"	18190	16730	130	606	613	177	100	106	41	100	100	0	2380	2096	746	37	40	24	100	100	0	0.216	0.249	0.242	0.262	1.604	0.230	0.779	120	572	2849	2572	-2.211	506	2343	513	2059	0
4	15	14	"iYGL118C"	"iYGL118C"	18400	16730	130	197	218	112	102	106	39	82	62	0	573	548	224	37	40	23	98	95	0	0.177	0.227	0.198	0.192	2.537	0.201	0.358	120	580	631	627	-2.496	95	536	116	511	0
4	16	14	"iYGR165W"	"iYGR165W"	18590	16740	130	533	548	168	101	102	31	99	99	0	1506	1387	545	37	40	22	100	100	0	0.294	0.331	0.316	0.359	1.764	0.294	0.796	120	559	1901	1797	-1.766	432	1469	447	1350	0
4	17	14	"iYGR169C"	"iYGR169C"	18790	16740	140	1235	1190	462	99	103	43	98	97	0	3222	2881	1313	39	41	28	96	96	0	0.357	0.384	0.377	0.437	1.987	0.360	0.903	156	573	4319	3933	-1.486	1136	3183	1091	2842	0
4	18	14	"iYGR173W"	"iYGR173W"	18980	16740	130	1509	1389	470	98	105	48	100	100	0	1695	1524	714	39	43	34	100	99	0	0.852	0.869	0.892	0.980	1.520	0.790	0.906	120	537	3067	2776	-0.231	1411	1656	1291	1485	0
4	19	14	"iYGRWdelta31"	"iYGRWdelta31"	19200	16740	140	753	780	306	99	105	40	100	99	0	1191	1110	472	40	43	28	100	100	0	0.568	0.636	0.624	0.667	1.702	0.616	0.857	156	599	1805	1751	-0.816	654	1151	681	1070	0
4	20	14	"iYGR191W"	"iYGR191W"	19400	16740	140	2646	2605	1062	103	108	66	100	100	0	2395	2205	983	39	44	42	98	97	0	1.079	1.155	1.127	1.276	1.684	1.145	0.939	156	592	4899	4668	0.110	2543	2356	2502	2166	0
4	21	14	"iYGR195W"	"iYGR195W"	19610	16730	130	758	767	301	104	109	64	99	97	0	2036	1909	749	38	41	40	99	99	0	0.327	0.354	0.357	0.360	1.515	0.337	0.844	120	622	2652	2534	-1.611	654	1998	663	1871	0
4	1	15	"iYGR211W"	"iYGR211W"	15600	16930	130	865	841	266	97	102	33	100	100	0	2413	2163	908	37	40	31	99	98	0	0.323	0.350	0.335	0.398	1.843	0.314	0.872	120	639	3144	2870	-1.629	768	2376	744	2126	0
4	2	15	"iYGR215W"	"iYGR215W"	15790	16950	130	687	688	225	101	107	36	100	100	0	833	824	345	37	40	32	100	97	0	0.736	0.746	0.741	0.793	1.579	0.699	0.871	120	559	1382	1374	-0.442	586	796	587	787	0
4	3	15	"iYGRCtau3"	"iYGRCtau3"	16000	16940	140	638	620	203	102	107	36	99	96	0	1149	1058	443	37	38	16	99	98	0	0.482	0.507	0.486	0.538	1.687	0.476	0.859	156	569	1648	1539	-1.053	536	1112	518	1021	0
4	4	15	"iYGR234W"	"iYGR234W"	16190	16940	140	1060	994	312	102	106	45	100	100	0	1558	1419	543	38	40	26	98	97	0	0.630	0.646	0.641	0.697	1.783	0.617	0.893	156	557	2478	2273	-0.666	958	1520	892	1381	0
4	5	15	"iYGR238C"	"iYGR238C"	16400	16930	140	663	657	199	100	104	44	99	98	0	2202	1971	761	39	41	28	99	99	0	0.260	0.288	0.272	0.312	1.867	0.266	0.852	156	604	2726	2489	-1.942	563	2163	557	1932	0
4	6	15	"iYGR243W"	"iYGR243W"	16600	16940	130	279	293	98	97	100	33	95	91	0	623	621	230	37	38	20	98	98	0	0.311	0.336	0.308	0.332	2.181	0.322	0.427	120	518	768	780	-1.687	182	586	196	584	0
4	7	15	"iYHR177W"	"iYHR177W"	16800	16940	140	1205	1149	397	97	101	33	100	100	0	3906	3524	1453	37	38	18	100	100	0	0.286	0.302	0.293	0.326	1.878	0.281	0.873	156	535	4977	4539	-1.804	1108	3869	1052	3487	0
4	8	15	"iYHR180W"	"iYHR180W"	16990	16940	140	1513	1494	444	100	103	31	100	100	0	3688	3269	1407	37	38	17	99	99	0	0.387	0.431	0.418	0.486	1.675	0.390	0.892	156	564	5064	4626	-1.370	1413	3651	1394	3232	0
4	9	15	"iYHR183W"	"iYHR183W"	17200	16940	140	1585	1643	697	101	104	31	100	99	0	2357	2358	1179	37	38	17	100	100	0	0.640	0.664	0.649	0.715	1.895	0.633	0.900	156	557	3804	3863	-0.645	1484	2320	1542	2321	0
4	10	15	"iYHR200W"	"iYHR200W"	17380	16940	140	253	266	99	97	100	32	94	87	0	515	497	204	35	38	25	96	95	0	0.325	0.366	0.337	0.346	2.098	0.346	0.671	156	481	636	631	-1.621	156	480	169	462	0
4	11	15	"iYHR204W"	"iYHR204W"	17590	16940	140	742	741	236	97	102	37	99	98	0	3161	2737	1116	37	39	26	99	98	0	0.206	0.239	0.240	0.265	1.974	0.216	0.856	156	504	3769	3344	-2.276	645	3124	644	2700	0
4	12	15	"iYHR208W"	"iYHR208W"	17790	16940	140	1233	1176	384	102	107	39	100	98	0	4298	3799	1537	38	39	18	100	99	0	0.265	0.286	0.277	0.313	1.830	0.262	0.877	156	526	5391	4835	-1.913	1131	4260	1074	3761	0
4	13	15	"iYIL166C"	"iYIL166C"	18010	16930	130	1536	1499	559	101	104	36	100	100	0	2589	2330	1052	37	39	18	100	100	0	0.562	0.610	0.570	0.695	1.779	0.589	0.850	120	520	3987	3691	-0.831	1435	2552	1398	2293	0
4	14	15	"iYIL162W"	"iYIL162W"	18210	16930	130	453	466	151	97	101	36	99	96	0	2038	1834	755	37	40	21	100	100	0	0.178	0.205	0.192	0.222	1.814	0.186	0.830	120	547	2357	2166	-2.491	356	2001	369	1797	0
4	15	15	"iYIL157C"	"iYIL157C"	18410	16930	130	1118	1070	364	98	101	34	100	100	0	2971	2616	1136	37	40	22	100	100	0	0.348	0.377	0.371	0.427	1.688	0.335	0.879	120	534	3954	3551	-1.524	1020	2934	972	2579	0
4	16	15	"iYIL140W"	"iYIL140W"	18610	16930	140	1260	1226	466	102	104	32	100	100	0	1361	1239	562	38	39	18	98	98	0	0.875	0.936	0.931	1.008	1.692	0.904	0.892	156	518	2481	2325	-0.192	1158	1323	1124	1201	0
4	17	15	"iYIL136W"	"iYIL136W"	18800	16930	130	3424	3617	1578	102	109	60	100	100	0	5944	5710	2818	38	53	140	100	99	0	0.562	0.620	0.597	0.678	1.562	0.577	0.912	120	470	9228	9187	-0.830	3322	5906	3515	5672	0
4	18	15	"iYIL133C"	"iYIL133C"	19010	16930	140	573	697	361	98	108	61	96	93	0	2063	2054	1048	39	54	136	97	94	0	0.235	0.297	0.281	0.305	2.096	0.285	0.815	156	507	2499	2614	-2.091	475	2024	599	2015	0
4	19	15	"iYJL112W"	"iYJL112W"	19200	16930	140	951	913	367	99	106	39	99	97	0	2337	2051	972	40	41	22	98	98	0	0.371	0.405	0.398	0.440	1.849	0.369	0.839	156	492	3149	2825	-1.431	852	2297	814	2011	0
4	20	15	"iYJL107C"	"iYJL107C"	19410	16930	130	721	711	267	101	104	33	98	97	0	2837	2625	1309	41	43	22	99	98	0	0.222	0.236	0.233	0.266	1.819	0.209	0.839	120	511	3416	3194	-2.173	620	2796	610	2584	0
4	21	15	"iYJL104W"	"iYJL104W"	19610	16930	140	737	699	236	99	103	35	98	97	0	1720	1576	663	39	42	22	98	98	0	0.380	0.390	0.394	0.429	1.918	0.361	0.857	156	720	2319	2137	-1.398	638	1681	600	1537	0
4	1	16	"iYJL089W"	"iYJL089W"	15590	17140	140	231	236	85	98	102	33	91	79	0	690	634	270	38	40	29	97	96	0	0.204	0.232	0.218	0.230	2.262	0.209	0.590	156	736	785	734	-2.293	133	652	138	596	0
4	2	16	"iYJL083W"	"iYJL083W"	15800	17140	140	557	546	162	100	105	35	99	98	0	2216	1963	806	38	39	24	99	99	0	0.210	0.232	0.222	0.251	1.683	0.207	0.840	156	549	2635	2371	-2.253	457	2178	446	1925	0
4	3	16	"iYJL079C"	"iYJL079C"	16010	17130	140	717	718	225	101	106	37	99	99	0	3636	3219	1341	39	40	19	100	100	0	0.171	0.194	0.185	0.213	1.705	0.175	0.864	156	500	4213	3797	-2.546	616	3597	617	3180	0
4	4	16	"iYJL060W"	"iYJL060W"	16200	17140	140	800	764	254	99	108	50	98	97	0	1143	1002	425	39	42	30	98	97	0	0.635	0.691	0.680	0.742	1.497	0.656	0.912	156	492	1805	1628	-0.655	701	1104	665	963	0
4	5	16	"iYJL055W"	"iYJL055W"	16390	17140	140	346	364	125	99	105	47	98	94	0	1286	1191	461	39	41	29	99	98	0	0.198	0.230	0.217	0.238	2.034	0.210	0.742	156	514	1494	1417	-2.336	247	1247	265	1152	0
4	6	16	"iYJL051W"	"iYJL051W"	16590	17130	140	554	581	218	98	112	96	96	91	0	1861	1667	627	38	42	34	98	98	0	0.250	0.297	0.286	0.310	1.876	0.279	0.818	156	562	2279	2112	-1.999	456	1823	483	1629	0
4	7	16	"itR(UCU)J2"	"itR(UCU)J2"	16790	17130	140	205	223	77	99	113	98	55	14	0	628	605	227	38	42	33	98	97	0	0.180	0.219	0.205	0.211	2.057	0.217	0.230	156	533	696	691	-2.477	106	590	124	567	0
4	8	16	"iYJLCdelta7"	"iYJLCdelta7"	16990	17140	150	463	494	159	97	101	35	100	98	0	2546	2400	977	37	38	17	100	99	0	0.146	0.168	0.166	0.184	1.760	0.156	0.876	156	534	2875	2760	-2.777	366	2509	397	2363	0
4	9	16	"iYJL034W"	"iYJL034W"	17200	17140	140	892	887	265	98	101	34	100	100	0	2166	1930	757	37	38	17	100	100	0	0.373	0.417	0.412	0.460	1.545	0.390	0.917	156	560	2923	2682	-1.423	794	2129	789	1893	0
4	10	16	"iYKL134C"	"iYKL134C"	17410	17120	150	284	311	184	96	99	29	96	93	0	830	734	359	37	37	16	98	94	0	0.237	0.308	0.279	0.328	2.246	0.300	0.563	156	541	981	912	-2.077	188	793	215	697	0
4	11	16	"iYKL129C"	"iYKL129C"	17600	17110	150	148	160	60	96	101	33	66	42	0	259	252	102	37	38	16	98	96	0	0.234	0.298	0.281	0.303	3.286	0.246	0.256	156	565	274	279	-2.094	52	222	64	215	0
4	12	16	"iYKL126W"	"iYKL126W"	17800	17110	150	309	303	88	102	105	37	98	93	0	1393	1249	473	37	38	17	99	99	0	0.153	0.166	0.165	0.171	1.879	0.150	0.737	156	620	1563	1413	-2.712	207	1356	201	1212	0
4	13	16	"iYKL108W"	"iYKL108W"	18010	17110	140	1117	1079	379	99	103	35	100	99	0	2295	2070	939	37	38	17	99	98	0	0.451	0.482	0.480	0.563	1.914	0.451	0.918	156	584	3276	3013	-1.149	1018	2258	980	2033	0
4	14	16	"iYKL104C"	"iYKL104C"	18190	17110	140	655	633	201	98	102	31	99	98	0	3890	3370	1271	38	42	85	99	98	0	0.145	0.161	0.161	0.170	1.569	0.150	0.886	156	586	4409	3867	-2.790	557	3852	535	3332	0
4	15	16	"iYKL100C"	"iYKL100C"	18400	17110	140	657	656	192	98	101	32	99	98	0	2177	1946	780	37	43	87	98	98	0	0.261	0.292	0.284	0.317	1.563	0.270	0.900	156	639	2699	2467	-1.937	559	2140	558	1909	0
4	16	16	"iYKL086W"	"iYKL086W"	18610	17110	140	221	227	83	97	100	31	90	82	0	411	404	155	37	39	37	96	94	0	0.332	0.354	0.354	0.342	2.102	1.095	0.456	156	612	498	497	-1.593	124	374	130	367	0
4	17	16	"iYKL081W"	"iYKL081W"	18810	17110	140	293	307	91	99	103	46	98	92	0	1153	1035	430	38	48	123	96	90	0	0.174	0.209	0.206	0.226	1.856	0.194	0.727	156	605	1309	1205	-2.523	194	1115	208	997	0
4	18	16	"iYKL077W"	"iYKL077W"	19010	17120	140	2323	2044	694	96	103	48	100	100	0	1808	1523	639	37	48	128	97	96	0	1.257	1.311	1.320	1.435	1.529	1.261	0.948	156	554	3998	3434	0.331	2227	1771	1948	1486	0
4	19	16	"iYKLWdelta7"	"iYKLWdelta7"	19190	17110	140	465	471	165	98	102	31	98	98	0	1103	1028	421	38	38	16	100	99	0	0.345	0.377	0.390	0.391	1.644	0.355	0.843	156	546	1432	1363	-1.537	367	1065	373	990	0
4	20	16	"iYKL063C-0"	"iYKL063C-0"	19390	17120	140	1169	1190	361	99	102	31	100	100	0	2965	2634	917	39	49	181	98	97	0	0.366	0.420	0.412	0.445	1.453	0.403	0.901	156	627	3996	3686	-1.451	1070	2926	1091	2595	0
4	21	16	"iYKL060C"	"iYKL060C"	19590	17120	140	1070	1041	316	97	102	37	100	100	0	2724	2463	943	38	47	165	99	98	0	0.362	0.389	0.383	0.411	1.445	0.365	0.915	156	762	3659	3369	-1.465	973	2686	944	2425	0
4	1	17	"iYLR056W"	"iYLR056W"	15600	17330	140	470	477	194	98	103	34	100	98	0	1409	1235	540	37	38	17	99	98	0	0.271	0.316	0.304	0.347	1.782	0.293	0.763	156	681	1744	1577	-1.883	372	1372	379	1198	0
4	2	17	"iYLR060W"	"iYLR060W"	15780	17330	150	314	321	111	99	104	33	98	95	0	900	839	360	38	38	17	100	100	0	0.249	0.277	0.264	0.286	2.091	0.242	0.681	156	559	1077	1023	-2.003	215	862	222	801	0
4	3	17	"iYLR065C"	"iYLR065C"	15980	17320	150	933	949	328	98	102	35	100	100	0	846	848	372	39	40	19	100	97	0	1.035	1.052	1.031	1.159	1.676	1.010	0.900	156	630	1642	1660	0.049	835	807	851	809	0
4	4	17	"iYLR082C"	"iYLR082C"	16190	17330	140	825	817	283	98	103	36	100	100	0	1860	1709	768	39	41	29	100	100	0	0.399	0.431	0.429	0.477	1.577	0.396	0.895	156	589	2548	2389	-1.325	727	1821	719	1670	0
4	5	17	"iYLR086W"	"iYLR086W"	16390	17330	140	2721	2480	876	97	107	58	100	100	0	1932	1652	730	38	44	51	98	95	0	1.385	1.476	1.487	1.680	1.591	1.433	0.923	156	549	4518	3997	0.470	2624	1894	2383	1614	0
4	6	17	"iYLR090W"	"iYLR090W"	16570	17330	140	977	951	287	100	110	67	100	99	0	1578	1448	571	37	42	42	99	98	0	0.569	0.603	0.581	0.653	1.541	0.571	0.912	156	615	2418	2262	-0.813	877	1541	851	1411	0
4	7	17	"iYLRCdelta5"	"iYLRCdelta5"	16800	17330	150	366	375	151	99	111	89	90	75	0	667	639	310	37	40	31	96	94	0	0.424	0.458	0.429	0.494	2.110	0.453	0.572	156	682	897	878	-1.239	267	630	276	602	0
4	8	17	"iYLR110C"	"iYLR110C"	16990	17330	140	305	319	122	97	100	34	96	92	0	1021	955	383	36	59	412	85	67	0	0.211	0.242	0.222	0.240	1.842	0.123	0.356	156	571	1193	1141	-2.244	208	985	222	919	0
4	9	17	"itR(ACG)L"	"itR(ACG)L"	17180	17330	150	1556	1445	476	96	102	35	99	98	0	2703	2274	948	38	58	382	89	87	0	0.548	0.603	0.585	0.670	1.618	0.567	0.927	156	664	4125	3585	-0.868	1460	2665	1349	2236	0
4	10	17	"iYLR129W"	"iYLR129W"	17400	17330	150	1361	1358	519	98	103	34	100	100	0	1105	1001	429	38	39	18	98	98	0	1.184	1.308	1.284	1.416	1.545	1.331	0.903	156	671	2330	2223	0.243	1263	1067	1260	963	0
4	11	17	"iYLR133W"	"iYLR133W"	17580	17350	140	898	901	288	98	102	33	100	100	0	2457	2250	835	37	38	18	100	98	0	0.331	0.363	0.342	0.402	1.739	0.343	0.878	156	652	3220	3016	-1.597	800	2420	803	2213	0
4	12	17	"iYLR137W"	"iYLR137W"	17790	17340	140	704	732	230	99	103	32	100	100	0	2002	1839	686	37	38	17	100	100	0	0.308	0.351	0.344	0.372	1.661	0.331	0.891	156	684	2570	2435	-1.700	605	1965	633	1802	0
4	13	17	"iYLR448W"	"iYLR448W"	17990	17340	150	763	761	264	99	103	32	100	100	0	2317	2101	863	38	38	17	100	99	0	0.291	0.321	0.323	0.350	1.594	0.305	0.886	156	711	2943	2725	-1.779	664	2279	662	2063	0
4	14	17	"iYLR452C"	"iYLR452C"	18180	17340	140	1050	1020	329	97	101	31	100	100	0	4139	3577	1373	37	41	81	100	99	0	0.232	0.261	0.253	0.280	1.487	0.243	0.884	156	637	5055	4463	-2.106	953	4102	923	3540	0
4	15	17	"iYLRCdelta27"	"iYLRCdelta27"	18370	17340	140	2228	2217	731	98	101	31	100	100	0	4439	4126	1676	36	42	84	98	98	0	0.484	0.518	0.510	0.585	1.790	0.492	0.941	156	683	6533	6209	-1.048	2130	4403	2119	4090	0
4	16	17	"iYML129C"	"iYML129C"	18580	17340	130	518	525	180	98	102	35	99	99	0	2164	2025	803	38	40	37	100	100	0	0.198	0.215	0.210	0.225	1.695	0.194	0.823	120	640	2546	2414	-2.340	420	2126	427	1987	0
4	17	17	"iYML125C"	"iYML125C"	18790	17350	140	1435	1337	439	97	102	38	100	100	0	2916	2495	986	39	39	18	100	100	0	0.465	0.505	0.499	0.533	1.418	0.483	0.932	156	681	4215	3696	-1.104	1338	2877	1240	2456	0
4	18	17	"iYML121W"	"iYML121W"	18990	17350	150	1904	1753	637	97	102	37	100	100	0	3460	2876	1244	39	39	18	100	99	0	0.528	0.584	0.589	0.628	1.397	0.564	0.937	156	626	5228	4493	-0.921	1807	3421	1656	2837	0
4	19	17	"iYML105C"	"iYML105C"	19170	17350	150	1133	1051	369	96	99	31	100	100	0	1453	1259	567	37	38	18	99	98	0	0.732	0.782	0.808	0.879	1.638	0.736	0.891	156	649	2453	2177	-0.449	1037	1416	955	1222	0
4	20	17	"iYML100W"	"iYML100W"	19380	17350	140	2162	1955	681	97	100	30	100	100	0	2090	1758	752	38	48	178	95	93	0	1.006	1.080	1.061	1.173	1.444	1.039	0.935	156	654	4117	3578	0.009	2065	2052	1858	1720	0
4	21	17	"iYML095C"	"iYML095C"	19580	17360	140	577	560	164	96	100	32	100	100	0	1402	1217	485	37	46	162	98	91	0	0.352	0.393	0.389	0.427	1.645	0.341	0.801	156	790	1846	1644	-1.505	481	1365	464	1180	0
4	1	18	"iYML077W"	"iYML077W"	15590	17550	140	3189	3059	1058	99	105	39	100	100	0	1823	1579	701	37	38	19	99	99	0	1.730	1.920	1.883	2.076	1.393	1.849	0.930	156	736	4876	4502	0.791	3090	1786	2960	1542	0
4	2	18	"iYML074C-1"	"iYML074C-1"	15770	17550	150	2527	2400	788	97	102	34	100	100	0	3865	3410	1420	38	40	31	100	100	0	0.635	0.683	0.694	0.747	1.443	0.652	0.912	156	576	6257	5675	-0.655	2430	3827	2303	3372	0
4	3	18	"itR(UCU)M2"	"itR(UCU)M2"	15950	17550	140	1482	1577	615	96	101	37	100	100	0	1728	1623	577	39	40	31	99	99	0	0.821	0.935	0.886	0.945	1.547	0.949	0.853	156	633	3075	3065	-0.285	1386	1689	1481	1584	0
4	4	18	"iYMR210W"	"iYMR210W"	16170	17550	140	380	380	124	97	101	35	99	97	0	859	783	319	38	39	17	98	96	0	0.345	0.380	0.366	0.405	1.856	0.344	0.762	156	683	1104	1028	-1.537	283	821	283	745	0
4	5	18	"iYMR214W"	"iYMR214W"	16380	17560	140	430	419	137	99	109	62	95	89	0	1702	1546	709	38	43	49	98	97	0	0.199	0.212	0.210	0.235	2.004	0.194	0.812	156	596	1995	1828	-2.330	331	1664	320	1508	0
4	6	18	"iYMR218C"	"iYMR218C"	16570	17550	150	308	323	106	102	113	84	91	66	0	925	833	353	38	45	66	96	93	0	0.232	0.278	0.268	0.288	1.961	0.258	0.563	156	644	1093	1016	-2.106	206	887	221	795	0
4	7	18	"iYMR234W"	"iYMR234W"	16780	17560	140	509	480	175	98	105	69	94	87	0	766	676	328	37	42	55	95	92	0	0.564	0.598	0.599	0.652	1.682	0.563	0.760	156	622	1140	1021	-0.827	411	729	382	639	0
4	8	18	"iYMR238W"	"iYMR238W"	16980	17560	140	391	388	119	96	100	32	99	96	0	672	601	261	36	59	411	73	10	0	0.464	0.517	0.501	0.562	1.690	0.158	0.238	156	574	931	857	-1.108	295	636	292	565	0
4	9	18	"iYMR241W"	"iYMR241W"	17170	17560	140	948	897	242	98	103	36	100	100	0	1228	1110	385	36	60	410	89	82	0	0.713	0.744	0.739	0.799	1.506	0.703	0.894	156	575	2042	1873	-0.488	850	1192	799	1074	0
4	10	18	"iYMR255W"	"iYMR255W"	17370	17560	140	793	758	244	103	108	42	99	98	0	1020	930	374	37	41	30	98	98	0	0.702	0.733	0.734	0.805	1.721	0.694	0.868	156	564	1673	1548	-0.511	690	983	655	893	0
4	11	18	"iYMR259C"	"iYMR259C"	17560	17560	140	366	379	147	102	106	38	98	96	0	1040	926	391	37	40	29	99	97	0	0.263	0.312	0.292	0.336	1.750	0.283	0.696	156	532	1267	1166	-1.926	264	1003	277	889	0
4	12	18	"iYMR263W"	"iYMR263W"	17770	17560	140	440	427	138	98	102	33	99	96	0	1842	1579	717	36	38	17	99	99	0	0.189	0.213	0.208	0.246	1.926	0.186	0.808	156	582	2148	1872	-2.401	342	1806	329	1543	0
4	13	18	"iYMR277W"	"iYMR277W"	17950	17550	130	604	600	206	100	103	32	99	99	0	1885	1678	711	37	40	25	99	99	0	0.273	0.305	0.300	0.335	1.804	0.280	0.868	120	539	2352	2141	-1.874	504	1848	500	1641	0
4	14	18	"iYMR282C"	"iYMR282C"	18170	17560	140	254	258	82	98	101	31	94	87	0	1462	1324	522	38	40	25	98	98	0	0.110	0.124	0.123	0.130	2.052	0.114	0.690	156	639	1580	1446	-3.190	156	1424	160	1286	0
4	15	18	"iYMR284W"	"iYMR284W"	18380	17550	140	634	605	186	100	102	30	98	97	0	863	769	289	38	38	17	99	98	0	0.647	0.691	0.676	0.726	1.578	0.665	0.850	156	582	1359	1236	-0.628	534	825	505	731	0
4	16	18	"iYNL061W"	"iYNL061W"	18570	17550	140	2679	2558	842	100	104	36	100	99	0	1407	1233	474	38	39	19	98	98	0	1.884	2.057	2.014	2.208	1.527	2.052	0.913	156	578	3948	3653	0.914	2579	1369	2458	1195	0
4	17	18	"iYNL055C"	"iYNL055C"	18770	17550	140	2364	2231	812	99	106	43	99	99	0	3694	3123	1365	40	41	20	99	99	0	0.620	0.692	0.693	0.774	1.653	0.656	0.938	156	587	5919	5215	-0.690	2265	3654	2132	3083	0
4	18	18	"iYNL052W"	"iYNL052W"	18970	17550	140	850	823	251	98	105	39	100	99	0	1692	1549	591	40	41	19	99	98	0	0.455	0.480	0.479	0.518	1.610	0.452	0.902	156	558	2404	2234	-1.135	752	1652	725	1509	0
4	19	18	"iYNL036W"	"iYNL036W"	19170	17550	140	1557	1558	546	97	99	30	100	99	0	737	701	264	38	39	17	99	99	0	2.089	2.204	2.159	2.287	1.429	2.249	0.879	156	566	2159	2124	1.063	1460	699	1461	663	0
4	20	18	"iYNL035C"	"iYNL035C"	19380	17550	140	739	760	267	96	98	29	100	99	0	514	479	192	39	40	24	97	96	0	1.354	1.509	1.531	1.645	1.684	1.513	0.869	156	561	1118	1104	0.437	643	475	664	440	0
4	21	18	"iYNL032W"	"iYNL032W"	19570	17550	120	187	194	62	94	97	31	89	68	0	131	133	64	38	39	18	90	82	0	1.000	1.053	1.093	1.104	2.335	1.041	0.454	120	542	186	195	0.000	93	93	100	95	0
4	1	19	"iYNL016W"	"iYNL016W"	15580	17760	140	557	541	192	99	104	41	97	96	0	1234	1095	499	37	38	18	99	98	0	0.383	0.418	0.395	0.457	1.701	0.388	0.840	156	712	1655	1500	-1.386	458	1197	442	1058	0
4	2	19	"iYNL011C"	"iYNL011C"	15780	17760	140	1550	1444	413	98	102	36	100	100	0	1906	1659	655	39	40	33	99	98	0	0.778	0.831	0.818	0.912	1.456	0.785	0.937	156	522	3319	2966	-0.363	1452	1867	1346	1620	0
4	3	19	"iYNL007C"	"iYNL007C"	15970	17760	140	1082	1051	324	99	103	38	100	100	0	1701	1554	557	39	41	33	99	98	0	0.591	0.628	0.600	0.669	1.485	0.596	0.897	156	572	2645	2467	-0.758	983	1662	952	1515	0
4	4	19	"iYNR007C"	"iYNR007C"	16180	17760	140	626	627	207	101	105	40	99	99	0	1228	1127	436	39	40	22	100	99	0	0.442	0.483	0.476	0.507	1.533	0.457	0.855	156	538	1714	1614	-1.179	525	1189	526	1088	0
4	5	19	"iYNR011C"	"iYNR011C"	16360	17750	150	484	499	162	100	108	47	99	97	0	1770	1657	630	40	41	23	100	100	0	0.222	0.247	0.237	0.259	1.754	0.217	0.749	156	534	2114	2016	-2.172	384	1730	399	1617	0
4	6	19	"iYNR015W"	"iYNR015W"	16570	17750	140	511	514	172	100	110	75	98	94	0	1344	1279	526	39	66	548	87	67	0	0.315	0.334	0.326	0.364	1.759	0.177	0.464	156	578	1716	1654	-1.667	411	1305	414	1240	0
4	7	19	"iYOR055W"	"iYOR055W"	16780	17750	140	570	568	190	98	105	71	98	94	0	1651	1471	545	38	66	552	87	76	0	0.293	0.328	0.320	0.342	1.551	0.196	0.521	156	570	2085	1903	-1.773	472	1613	470	1433	0
4	8	19	"iYOR058C-1"	"iYOR058C-1"	16980	17750	140	507	494	153	97	101	33	98	95	0	2141	1924	804	37	39	19	99	98	0	0.195	0.210	0.209	0.234	1.754	0.190	0.865	156	526	2514	2284	-2.359	410	2104	397	1887	0
4	9	19	"iYOR060C"	"iYOR060C"	17180	17750	140	405	398	126	98	103	34	96	95	0	1709	1523	600	38	39	17	100	100	0	0.184	0.202	0.197	0.204	1.742	0.187	0.829	156	548	1978	1785	-2.444	307	1671	300	1485	0
4	10	19	"iYOR073W"	"iYOR073W"	17390	17740	140	502	511	158	104	106	37	100	98	0	1062	980	344	37	40	28	100	99	0	0.388	0.432	0.428	0.440	1.474	0.418	0.866	156	506	1423	1350	-1.365	398	1025	407	943	0
4	11	19	"iYOR077W"	"iYOR077W"	17580	17750	140	386	393	129	101	105	36	96	95	0	1400	1222	530	36	39	30	99	98	0	0.209	0.246	0.246	0.264	1.760	0.224	0.813	156	522	1649	1478	-2.259	285	1364	292	1186	0
4	12	19	"iYOR081C"	"iYOR081C"	17790	17750	140	271	276	94	98	102	32	95	89	0	896	762	346	36	38	21	97	96	0	0.201	0.245	0.233	0.258	2.131	0.213	0.668	156	554	1033	904	-2.314	173	860	178	726	0
4	13	19	"iYOR098C"	"iYOR098C"	17980	17740	130	758	766	278	100	103	33	100	100	0	2529	2232	1012	37	42	29	100	100	0	0.264	0.303	0.292	0.335	1.600	0.276	0.887	120	549	3150	2861	-1.921	658	2492	666	2195	0
4	14	19	"iYOR103C"	"iYOR103C"	18190	17740	150	1119	1069	328	101	105	33	99	99	0	4196	3605	1437	39	42	27	100	100	0	0.245	0.271	0.272	0.289	1.412	0.251	0.919	156	631	5175	4534	-2.030	1018	4157	968	3566	0
4	15	19	"iYOR108W"	"iYOR108W"	18400	17750	140	417	430	157	100	102	31	99	98	0	1926	1702	809	39	40	21	99	98	0	0.168	0.198	0.196	0.224	1.869	0.183	0.838	156	542	2204	1993	-2.574	317	1887	330	1663	0
4	16	19	"iYOR125C"	"iYOR125C"	18590	17750	140	160	165	55	98	101	33	71	46	0	406	373	158	38	39	17	95	94	0	0.168	0.200	0.191	0.191	2.592	0.182	0.386	156	552	430	402	-2.569	62	368	67	335	0
4	17	19	"iYOR129C"	"iYOR129C"	18770	17750	130	321	317	103	99	103	34	95	92	0	1423	1272	517	39	40	19	100	99	0	0.160	0.177	0.166	0.180	1.805	0.157	0.738	120	538	1606	1451	-2.640	222	1384	218	1233	0
4	18	19	"iYOR133W"	"iYOR133W"	18980	17750	140	705	659	199	98	103	39	99	98	0	1821	1570	643	40	42	34	99	98	0	0.341	0.367	0.375	0.406	1.688	0.341	0.904	156	656	2388	2091	-1.553	607	1781	561	1530	0
4	19	19	"iYPL241C"	"iYPL241C"	19200	17750	140	285	311	116	99	102	38	96	94	0	891	828	375	41	42	35	98	95	0	0.219	0.269	0.238	0.285	2.030	0.230	0.644	156	576	1036	999	-2.192	186	850	212	787	0
4	20	19	"iYPL236C"	"iYPL236C"	19380	17750	140	534	538	162	100	102	39	99	99	0	2226	2049	832	42	46	30	99	98	0	0.199	0.218	0.211	0.239	1.665	0.200	0.859	156	525	2618	2445	-2.331	434	2184	438	2007	0
4	21	19	"iYPL232W"	"iYPL232W"	19580	17750	140	409	410	129	99	103	39	100	96	0	2017	1889	794	42	46	29	100	98	0	0.157	0.168	0.163	0.183	1.805	0.151	0.795	156	726	2285	2158	-2.672	310	1975	311	1847	0
4	1	20	"iYPL216W"	"iYPL216W"	15580	17960	140	766	758	314	99	104	33	100	97	0	1460	1319	683	37	38	18	98	96	0	0.469	0.514	0.491	0.586	1.773	0.479	0.889	156	821	2090	1941	-1.093	667	1423	659	1282	0
4	2	20	"iYPL212C"	"iYPL212C"	15780	17950	150	253	261	83	99	102	31	97	90	0	744	678	301	39	39	18	97	95	0	0.218	0.254	0.240	0.267	2.180	0.218	0.618	156	723	859	801	-2.195	154	705	162	639	0
4	3	20	"iYPL208W"	"iYPL208W"	15980	17960	140	290	300	109	98	101	31	94	89	0	1571	1327	680	37	39	18	98	95	0	0.125	0.157	0.159	0.188	2.267	0.140	0.724	156	684	1726	1492	-2.998	192	1534	202	1290	0
4	4	20	"iYPL191C"	"iYPL191C"	16180	17950	140	255	268	88	101	104	35	98	89	0	417	402	167	38	39	20	96	96	0	0.406	0.459	0.457	0.448	1.904	0.438	0.710	156	668	533	531	-1.299	154	379	167	364	0
4	5	20	"iYPL187W"	"iYPL187W"	16380	17950	150	1417	1256	555	101	106	38	99	98	0	1534	1264	714	40	42	23	99	98	0	0.881	0.944	0.925	1.104	1.730	0.892	0.915	156	752	2810	2379	-0.183	1316	1494	1155	1224	0
4	6	20	"iYPL183C"	"iYPL183C"	16580	17950	150	744	743	532	99	104	34	83	81	0	1555	1819	1507	38	56	469	67	58	0	0.425	0.362	0.390	0.457	2.087	0.346	0.863	156	781	2162	2425	-1.234	645	1517	644	1781	0
4	7	20	"iYPL170W"	"iYPL170W"	16780	17960	150	547	531	192	98	102	33	98	97	0	1423	1196	584	37	38	18	98	97	0	0.324	0.374	0.370	0.425	1.964	0.339	0.865	156	797	1835	1592	-1.626	449	1386	433	1159	0
4	8	20	"iYPL165C"	"iYPL165C"	16980	17950	150	291	317	126	99	102	31	96	94	0	514	490	251	37	38	17	97	96	0	0.403	0.481	0.462	0.504	1.904	0.441	0.763	156	766	669	671	-1.313	192	477	218	453	0
4	9	20	"iYPL161C"	"iYPL161C"	17180	17960	140	176	189	67	100	102	32	82	56	0	735	659	311	38	38	17	97	97	0	0.109	0.143	0.126	0.144	2.631	0.116	0.394	156	720	773	710	-3.197	76	697	89	621	0
4	10	20	"iYPR149W"	"iYPR149W"	17380	17950	140	391	386	124	98	100	32	97	95	0	1061	947	370	38	39	18	100	100	0	0.286	0.317	0.304	0.335	1.802	0.295	0.790	156	718	1316	1197	-1.804	293	1023	288	909	0
4	11	20	"iYPR154W"	"iYPR154W"	17580	17950	140	1713	1698	616	98	100	33	100	100	0	1892	1712	731	36	43	124	96	94	0	0.870	0.955	0.926	1.057	1.583	0.918	0.921	156	708	3471	3276	-0.201	1615	1856	1600	1676	0
4	12	20	"iYPR158W"	"iYPR158W"	17780	17950	140	585	595	182	97	101	31	100	100	0	1920	1783	620	36	38	20	100	100	0	0.259	0.285	0.274	0.298	1.597	0.268	0.861	156	711	2372	2245	-1.949	488	1884	498	1747	0
4	13	20	"iYPRCtau3"	"iYPRCtau3"	17980	17950	140	2568	2634	1102	100	103	32	100	100	0	5458	4926	2053	36	39	21	99	98	0	0.455	0.518	0.495	0.569	1.679	0.508	0.907	156	742	7890	7424	-1.135	2468	5422	2534	4890	0
4	14	20	"iYPR173C"	"iYPR173C"	18180	17950	140	550	556	226	100	104	33	97	97	0	1757	1536	659	36	39	22	100	99	0	0.261	0.304	0.282	0.319	1.609	0.292	0.790	156	740	2171	1956	-1.935	450	1721	456	1500	0
4	15	20	"iYPR179C"	"iYPR179C"	18380	17950	150	594	552	207	99	103	32	97	93	0	1660	1355	693	37	38	19	97	96	0	0.305	0.344	0.345	0.389	1.743	0.321	0.901	156	759	2118	1771	-1.713	495	1623	453	1318	0
4	16	20	"iYPR195C-0"	"iYPR195C-0"	18570	17960	140	655	637	187	98	102	32	99	98	0	2314	2008	792	37	37	16	99	99	0	0.245	0.273	0.269	0.293	1.647	0.249	0.876	156	720	2834	2510	-2.031	557	2277	539	1971	0
4	17	20	"iYPRWtau4"	"iYPRWtau4"	18790	17960	140	506	495	176	98	101	32	98	96	0	2280	1972	877	38	38	18	99	98	0	0.182	0.205	0.197	0.225	1.843	0.193	0.870	156	775	2650	2331	-2.458	408	2242	397	1934	0
4	18	20	"iYPR200C"	"iYPR200C"	18980	17950	130	355	335	120	98	102	38	97	92	0	1282	1101	600	39	43	42	95	90	0	0.207	0.223	0.221	0.277	2.271	0.195	0.794	120	622	1500	1299	-2.274	257	1243	237	1062	0
4	19	20	"YDRCTy1-2A"	"YDRCTy1-2A"	19180	17960	140	27339	24109	10571	102	106	40	100	100	0	26558	22986	11750	41	45	44	100	100	0	1.027	1.046	1.030	1.262	1.840	1.008	0.947	156	759	53754	46952	0.039	27237	26517	24007	22945	0
4	20	20	"YDRWdelta12"	"YDRWdelta12"	19390	17950	140	18478	17071	5321	102	108	48	100	100	0	35710	29936	11730	43	52	61	100	100	0	0.515	0.568	0.555	0.627	1.565	0.541	0.960	156	668	54043	46862	-0.957	18376	35667	16969	29893	0
4	21	20	"YERWdelta9"	"YERWdelta9"	19570	17950	140	1969	1891	722	98	104	45	100	100	0	3996	3657	1733	41	51	60	98	97	0	0.473	0.496	0.489	0.581	1.821	0.465	0.933	156	804	5826	5409	-1.080	1871	3955	1793	3616	0
5	1	1	"YBR061C"	"YBR061C"	2110	18710	110	6692	6530	3291	92	96	33	100	100	0	4240	4000	2250	42	46	27	100	100	0	1.572	1.627	1.666	1.795	1.757	1.656	0.874	80	605	10798	10396	0.653	6600	4198	6438	3958	0
5	2	1	"MRS5"	"YBR091C"	2300	18700	110	437	435	197	90	94	30	92	88	0	2089	1961	1298	41	44	26	98	96	0	0.169	0.180	0.179	0.219	2.273	0.149	0.729	80	576	2395	2265	-2.561	347	2048	345	1920	0
5	3	1	"TFC1"	"YBR123C"	2500	18700	110	1566	1657	1008	91	95	33	100	100	0	6583	6606	4638	43	47	28	100	100	0	0.226	0.239	0.235	0.285	1.933	0.222	0.856	80	567	8015	8129	-2.149	1475	6540	1566	6563	0
5	4	1	"YBR063C"	"YBR063C"	2690	18700	110	2323	2504	1590	94	97	34	98	97	0	4739	4719	3450	41	44	25	100	98	0	0.474	0.515	0.528	0.580	1.994	0.486	0.836	80	583	6927	7088	-1.076	2229	4698	2410	4678	0
5	5	1	"PHO5"	"YBR093C"	2900	18710	100	199	281	318	92	96	32	83	71	0	288	358	299	41	46	38	90	85	0	0.433	0.596	0.497	0.506	2.520	0.836	0.627	80	518	354	506	-1.207	107	247	189	317	0
5	6	1	"PTC4"	"YBR125C"	3090	18710	110	1425	1436	856	89	228	1677	38	0	0	5331	4966	3460	43	87	520	88	81	0	0.253	0.274	0.265	0.307	1.948	0.615	0.205	80	581	6624	6270	-1.985	1336	5288	1347	4923	0
5	7	1	"ECM2"	"YBR065C"	3290	18710	110	1557	1528	816	89	226	1665	43	0	0	4297	4753	3228	43	86	516	90	78	0	0.345	0.306	0.308	0.361	1.830	0.700	0.227	80	590	5722	6149	-1.535	1468	4254	1439	4710	0
5	8	1	"YBR095C"	"YBR095C"	3490	18710	110	1384	1253	709	89	95	46	98	95	0	2813	3309	2340	43	48	31	100	100	0	0.468	0.356	0.361	0.404	1.828	0.315	0.766	80	580	4065	4430	-1.097	1295	2770	1164	3266	0
5	9	1	"VMA2"	"YBR127C"	3680	18720	110	1014	953	556	87	93	41	95	92	0	3132	3332	2391	41	49	113	92	91	0	0.300	0.263	0.283	0.331	2.343	0.218	0.775	80	605	4018	4157	-1.737	927	3091	866	3291	0
5	10	1	"TIP1"	"YBR067C"	3900	18710	110	799	811	430	88	91	29	98	95	0	3316	3134	2187	40	42	21	100	100	0	0.217	0.234	0.232	0.286	2.253	0.203	0.811	80	589	3987	3817	-2.204	711	3276	723	3094	0
5	11	1	"VPS15"	"YBR097W"	4090	18710	110	190	248	170	90	92	29	86	78	0	228	260	164	41	44	23	91	87	0	0.535	0.721	0.633	0.639	3.068	0.803	0.370	80	580	287	377	-0.903	100	187	158	219	0
5	12	1	"OPY1"	"YBR129C"	4290	18710	110	1025	982	591	94	96	31	97	96	0	2516	3370	2548	40	43	27	100	98	0	0.376	0.267	0.294	0.317	1.855	0.233	0.837	80	564	3407	4218	-1.411	931	2476	888	3330	0
5	13	1	"THR4"	"YCR053W"	4480	18710	120	3413	2904	1798	94	98	38	100	99	0	3568	3664	2786	41	46	31	97	95	0	0.941	0.776	0.729	0.990	2.530	0.694	0.793	120	682	6846	6433	-0.088	3319	3527	2810	3623	0
5	14	1	"YCR086W"	"YCR086W"	4690	18720	110	787	789	471	93	98	42	93	90	0	2670	2926	2174	43	50	35	100	98	0	0.264	0.241	0.249	0.271	2.189	0.209	0.799	80	560	3321	3579	-1.920	694	2627	696	2883	0
5	15	1	"YCRX10W"	"YCRX10W"	4880	18720	120	3610	3528	2015	96	100	36	100	100	0	1634	1710	1261	40	44	32	98	96	0	2.205	2.055	2.099	2.590	2.346	1.962	0.839	120	669	5108	5102	1.140	3514	1594	3432	1670	0
5	16	1	"YCR055C"	"YCR055C"	5080	18710	110	1583	1714	1005	93	98	37	100	98	0	3339	3456	2453	40	44	27	97	97	0	0.452	0.475	0.518	0.543	2.108	0.412	0.823	80	558	4789	5037	-1.147	1490	3299	1621	3416	0
5	17	1	"ABP1"	"YCR088W"	5270	18710	110	878	967	667	92	97	34	93	92	0	2500	3745	3429	41	46	35	96	92	0	0.320	0.236	0.274	0.337	2.609	0.198	0.810	80	560	3245	4579	-1.645	786	2459	875	3704	0
5	18	1	"YCRX12W"	"YCRX12W"	5470	18710	110	790	915	617	95	103	52	90	85	0	1234	1877	1703	40	53	89	90	78	0	0.582	0.446	0.459	0.587	2.718	0.394	0.779	80	609	1889	2657	-0.781	695	1194	820	1837	0
5	19	1	"PWP2"	"YCR057C"	5690	18710	110	968	1008	636	94	98	36	97	93	0	1752	2118	1618	37	42	74	96	90	0	0.510	0.439	0.448	0.520	2.114	0.385	0.838	80	593	2589	2995	-0.973	874	1715	914	2081	0
5	20	1	"YCR090C"	"YCR090C"	5890	18720	120	1374	1329	848	94	97	29	100	97	0	2228	2513	2084	37	40	22	98	96	0	0.584	0.499	0.506	0.616	2.549	0.428	0.825	120	660	3471	3711	-0.775	1280	2191	1235	2476	0
5	21	1	"YCRX14W"	"YCRX14W"	6080	18720	120	550	586	364	93	97	33	92	87	0	1317	1672	1405	38	41	24	95	94	0	0.357	0.302	0.297	0.373	2.721	0.255	0.802	120	719	1736	2127	-1.485	457	1279	493	1634	0
5	1	2	"YCR059C"	"YCR059C"	2080	18920	100	1297	1362	819	89	92	33	100	97	0	2591	2233	1324	41	44	26	97	96	0	0.474	0.581	0.512	0.642	2.079	0.529	0.769	80	483	3758	3465	-1.078	1208	2550	1273	2192	0
5	2	2	"MSH3"	"YCR092C"	2270	18920	110	2090	2692	2293	89	93	31	98	93	0	2593	3934	3640	41	42	21	96	96	0	0.784	0.669	0.658	0.697	1.987	0.644	0.800	80	593	4553	6496	-0.351	2001	2552	2603	3893	0
5	3	2	"YCRX16C"	"YCRX16C"	2490	18910	110	380	596	475	91	95	40	93	77	0	1680	2125	1837	38	41	21	96	95	0	0.176	0.242	0.252	0.270	3.022	0.218	0.739	80	593	1931	2592	-2.506	289	1642	505	2087	0
5	4	2	"YDR060W"	"YDR060W"	2690	18920	100	189	213	123	91	95	39	71	52	0	274	325	246	39	42	23	86	83	0	0.417	0.427	0.370	0.468	3.142	0.343	0.361	80	527	333	408	-1.262	98	235	122	286	0
5	5	2	"UBC13"	"YDR092W"	2890	18920	110	646	628	300	92	98	65	96	85	0	3604	3393	2095	40	44	32	97	95	0	0.155	0.160	0.173	0.208	2.495	0.142	0.765	80	567	4118	3889	-2.686	554	3564	536	3353	0
5	6	2	"YDR124W"	"YDR124W"	3080	18920	110	2148	1855	1036	92	99	65	98	96	0	4265	4231	2796	42	46	32	98	98	0	0.487	0.421	0.429	0.502	2.013	0.380	0.832	80	575	6279	5952	-1.038	2056	4223	1763	4189	0
5	7	2	"LCB2"	"YDR062W"	3290	18920	110	1354	1337	786	89	94	31	97	96	0	3683	3542	2247	40	43	24	97	97	0	0.347	0.356	0.370	0.387	2.236	0.337	0.754	80	584	4908	4750	-1.526	1265	3643	1248	3502	0
5	8	2	"YDR094W"	"YDR094W"	3490	18920	110	373	417	206	86	90	30	97	95	0	1364	1329	997	40	43	22	98	97	0	0.217	0.257	0.270	0.353	2.484	0.215	0.773	80	576	1611	1620	-2.206	287	1324	331	1289	0
5	9	2	"YDR126W"	"YDR126W"	3690	18930	100	718	655	338	86	91	31	95	92	0	2659	3022	2208	42	43	21	100	98	0	0.241	0.191	0.199	0.239	2.340	0.154	0.780	80	498	3249	3549	-2.050	632	2617	569	2980	0
5	10	2	"RPS13"	"YDR064W"	3880	18910	110	533	702	526	89	92	29	91	87	0	1627	2649	2585	41	42	21	98	98	0	0.280	0.235	0.253	0.277	2.175	0.198	0.787	80	584	2030	3221	-1.837	444	1586	613	2608	0
5	11	2	"GIS1"	"YDR096W"	4090	18920	110	5462	5490	3421	90	94	38	100	100	0	5976	5689	4184	41	43	37	97	95	0	0.905	0.956	0.947	1.294	2.587	0.918	0.833	80	571	11307	11048	-0.144	5372	5935	5400	5648	0
5	12	2	"YDR128W"	"YDR128W"	4270	18920	110	6152	6008	4331	95	102	44	100	100	0	4972	5584	4436	42	47	34	100	98	0	1.229	1.067	1.063	1.277	1.997	1.079	0.834	80	566	10987	11455	0.297	6057	4930	5913	5542	0
5	13	2	"YDR066C"	"YDR066C"	4480	18920	110	3864	3827	2627	93	96	31	98	98	0	2958	3397	2844	41	44	28	97	97	0	1.293	1.113	1.073	1.402	2.161	1.025	0.833	80	590	6688	7090	0.370	3771	2917	3734	3356	0
5	14	2	"GRX3"	"YDR098C"	4700	18920	110	1049	936	454	92	97	38	98	96	0	4793	4194	2491	41	44	31	100	100	0	0.201	0.203	0.192	0.241	2.381	0.179	0.768	80	584	5709	4997	-2.312	957	4752	844	4153	0
5	15	2	"YDR130C"	"YDR130C"	4900	18920	110	1474	1308	612	95	97	33	100	98	0	6854	5895	3263	41	48	39	100	98	0	0.202	0.207	0.214	0.240	2.204	0.189	0.793	80	531	8192	7067	-2.305	1379	6813	1213	5854	0
5	16	2	"SSN2"	"YDR443C"	5090	18910	110	229	306	222	90	94	34	82	71	0	415	522	405	37	42	31	92	86	0	0.368	0.445	0.360	0.423	3.353	0.391	0.480	80	554	517	701	-1.443	139	378	216	485	0
5	17	2	"YDR475C"	"YDR475C"	5300	18910	120	359	426	297	94	101	49	95	85	0	247	369	379	40	45	50	76	66	0	1.280	1.009	1.166	1.278	3.088	1.061	0.258	120	663	472	661	0.356	265	207	332	329	0
5	18	2	"GIN4"	"YDR507C"	5500	18920	100	178	201	107	97	100	49	67	36	0	201	259	209	39	43	49	81	66	0	0.500	0.473	0.441	0.487	3.335	0.397	0.388	80	506	243	324	-1.000	81	162	104	220	0
5	19	2	"YDR445C"	"YDR445C"	5700	18920	110	331	349	187	90	96	33	92	85	0	535	600	480	38	39	19	92	86	0	0.485	0.461	0.467	0.646	3.389	0.370	0.665	80	565	738	821	-1.044	241	497	259	562	0
5	20	2	"SNF1"	"YDR477W"	5890	18930	110	427	546	364	89	96	62	97	87	0	1050	1231	1028	38	41	23	97	93	0	0.334	0.383	0.353	0.487	2.653	0.326	0.747	80	568	1350	1650	-1.582	338	1012	457	1193	0
5	21	2	"YDR509W"	"YDR509W"	6110	18930	90	197	238	140	96	104	74	55	38	0	207	223	145	40	42	24	82	78	0	0.605	0.776	0.778	0.809	3.825	0.818	0.499	52	415	268	325	-0.725	101	167	142	183	0
5	1	3	"RPS17B"	"YDR447C"	2090	19120	110	604	583	320	89	93	31	96	95	0	1553	1820	1426	40	43	24	95	92	0	0.340	0.278	0.283	0.363	2.465	0.228	0.760	80	591	2028	2274	-1.555	515	1513	494	1780	0
5	2	3	"YDR479C"	"YDR479C"	2290	19120	110	2350	2281	1482	87	91	30	100	98	0	3962	3997	3034	40	43	26	100	100	0	0.577	0.554	0.585	0.661	2.023	0.499	0.803	80	569	6185	6151	-0.793	2263	3922	2194	3957	0
5	3	3	"YDR511W"	"YDR511W"	2490	19110	110	422	498	301	91	94	32	91	87	0	1209	1818	1657	40	43	25	97	93	0	0.283	0.229	0.222	0.334	3.139	0.177	0.672	80	585	1500	2185	-1.820	331	1169	407	1778	0
5	4	3	"YDR449C"	"YDR449C"	2690	19130	100	1201	1106	521	93	96	31	96	95	0	4064	3897	2418	40	43	25	97	96	0	0.275	0.263	0.248	0.315	2.162	0.223	0.814	80	507	5132	4870	-1.861	1108	4024	1013	3857	0
5	5	3	"PHO8"	"YDR481C"	2890	19120	100	162	202	129	90	94	34	75	52	0	235	286	237	39	44	31	83	75	0	0.367	0.453	0.468	0.547	2.623	0.469	0.538	80	498	268	359	-1.445	72	196	112	247	0
5	6	3	"TTR1"	"YDR513W"	3080	19120	110	598	675	455	89	98	66	88	81	0	1935	2108	1744	40	53	111	88	78	0	0.269	0.283	0.308	0.364	2.434	0.255	0.774	80	567	2404	2654	-1.896	509	1895	586	2068	0
5	7	3	"SPB4"	"YFL002C"	3290	19120	110	10409	9942	6608	88	97	43	98	97	0	2901	3522	2621	41	52	108	91	90	0	3.609	2.831	2.991	3.432	2.160	2.961	0.849	80	584	13181	13335	1.851	10321	2860	9854	3481	0
5	8	3	"HAC1"	"YFL031W"	3490	19120	110	605	641	432	89	91	30	92	82	0	1299	1774	1541	40	42	23	97	93	0	0.410	0.318	0.359	0.398	2.135	0.258	0.777	80	567	1775	2286	-1.287	516	1259	552	1734	0
5	9	3	"YFL061W"	"YFL061W"	3680	19120	110	2297	2201	1140	90	97	50	100	100	0	7534	6946	4485	41	44	26	100	100	0	0.295	0.306	0.297	0.371	2.010	0.271	0.842	80	548	9700	9016	-1.763	2207	7493	2111	6905	0
5	10	3	"YFL004W"	"YFL004W"	3880	19130	110	7804	6774	4021	95	99	39	100	98	0	3745	3884	2683	43	46	29	97	96	0	2.082	1.739	1.739	2.084	1.952	1.715	0.839	80	594	11411	10520	1.058	7709	3702	6679	3841	0
5	11	3	"RIM15"	"YFL033C"	4090	19130	110	1137	1144	660	95	116	212	88	73	0	2266	2221	1547	42	52	79	91	90	0	0.469	0.481	0.486	0.598	2.619	0.412	0.734	80	594	3266	3228	-1.094	1042	2224	1049	2179	0
5	12	3	"YFL063W"	"YFL063W"	4300	19120	110	33249	29704	19082	102	157	295	100	100	0	19484	22177	14644	44	81	171	100	98	0	1.705	1.337	1.310	1.398	2.023	1.359	0.880	80	569	52587	51735	0.770	33147	19440	29602	22133	0
5	13	3	"YFL006W"	"YFL006W"	4490	19120	110	5262	4920	3113	96	105	67	98	98	0	3942	4758	3551	41	47	47	98	93	0	1.324	1.023	1.070	1.287	2.232	0.952	0.828	80	558	9067	9541	0.405	5166	3901	4824	4717	0
5	14	3	"YFL035C"	"YFL035C"	4690	19120	110	6758	6417	3946	95	100	37	100	100	0	3555	3969	3020	41	44	28	98	98	0	1.896	1.609	1.661	1.976	1.830	1.550	0.830	80	563	10177	10250	0.923	6663	3514	6322	3928	0
5	15	3	"YFL065C"	"YFL065C"	4890	19120	120	5762	6236	4351	96	102	50	100	98	0	12038	12877	10472	43	52	48	99	99	0	0.472	0.478	0.469	0.621	2.495	0.418	0.826	120	644	17661	18974	-1.082	5666	11995	6140	12834	0
5	16	3	"SMC1"	"YFL008W"	5110	19120	120	2614	2825	1884	95	103	62	98	98	0	3414	4513	3894	40	48	45	98	95	0	0.747	0.610	0.701	0.920	2.985	0.514	0.784	120	646	5893	7203	-0.422	2519	3374	2730	4473	0
5	17	3	"YFL035C-B"	"YFL035C-B"	5300	19120	110	1776	1519	855	95	102	57	93	91	0	3698	3124	2106	39	42	22	97	96	0	0.459	0.462	0.447	0.579	2.434	0.419	0.841	80	516	5340	4509	-1.122	1681	3659	1424	3085	0
5	18	3	"YFL067W"	"YFL067W"	5480	19120	110	8030	7302	4890	97	102	41	100	100	0	11658	12898	10050	40	52	142	98	96	0	0.683	0.560	0.578	0.667	2.027	0.499	0.815	80	542	19551	20063	-0.550	7933	11618	7205	12858	0
5	19	3	"RTG2"	"YGL252C"	5700	19130	120	4128	4770	3482	96	101	44	100	100	0	4654	5119	4321	40	49	128	90	82	0	0.874	0.920	1.024	1.335	2.965	0.857	0.873	120	671	8646	9753	-0.195	4032	4614	4674	5079	0
5	20	3	"YGR021W"	"YGR021W"	5900	19120	100	3197	2837	1491	94	100	45	100	100	0	4770	4129	2677	37	39	21	100	100	0	0.656	0.670	0.644	0.853	2.052	0.607	0.849	80	480	7836	6835	-0.609	3103	4733	2743	4092	0
5	21	3	"YGR053C"	"YGR053C"	6090	19120	100	1798	1707	994	94	104	70	98	93	0	3744	3627	2474	39	46	71	96	92	0	0.460	0.450	0.450	0.547	2.106	0.400	0.838	80	521	5409	5201	-1.121	1704	3705	1613	3588	0
5	1	4	"FZF1"	"YGL254W"	2100	19330	100	1663	1475	624	90	95	33	98	98	0	5434	4643	2464	41	46	29	100	98	0	0.292	0.301	0.293	0.355	2.086	0.261	0.818	80	511	6966	5987	-1.778	1573	5393	1385	4602	0
5	2	4	"MTL1"	"YGR023W"	2300	19320	110	8806	7939	4984	93	99	39	100	100	0	9080	8117	5904	43	51	38	100	98	0	0.964	0.972	1.009	1.219	2.285	0.959	0.831	80	568	17750	15920	-0.053	8713	9037	7846	8074	0
5	3	4	"MUP1"	"YGR055W"	2500	19330	100	1870	1605	749	93	99	68	100	98	0	6139	5742	3347	42	48	54	98	98	0	0.291	0.265	0.261	0.314	2.096	0.230	0.805	80	521	7874	7212	-1.779	1777	6097	1512	5700	0
5	4	4	"ADH4"	"YGL256W"	2700	19320	110	2189	2025	1083	96	102	68	97	93	0	5539	5385	3637	45	53	57	96	92	0	0.381	0.361	0.353	0.485	2.540	0.329	0.840	80	536	7587	7269	-1.392	2093	5494	1929	5340	0
5	5	4	"YGR025W"	"YGR025W"	2880	19320	110	2017	1942	1031	89	95	33	97	97	0	2261	1959	1220	41	45	29	96	92	0	0.868	0.966	1.009	1.156	2.145	0.923	0.841	80	563	4148	3771	-0.203	1928	2220	1853	1918	0
5	6	4	"LST7"	"YGR057C"	3100	19320	110	3459	3019	1869	92	95	33	100	96	0	4040	3711	2623	41	45	29	96	92	0	0.842	0.798	0.805	0.950	2.145	0.736	0.864	80	575	7366	6597	-0.248	3367	3999	2927	3670	0
5	7	4	"YGL258W"	"YGL258W"	3290	19330	110	3003	2672	1245	91	96	41	100	98	0	5563	4938	3309	39	45	29	98	97	0	0.527	0.527	0.494	0.737	2.878	0.441	0.807	80	564	8436	7480	-0.924	2912	5524	2581	4899	0
5	8	4	"RPS25A"	"YGR027C"	3500	19330	110	1884	1755	1068	90	92	30	97	97	0	2105	2222	1593	38	41	21	96	93	0	0.868	0.762	0.755	0.889	2.226	0.706	0.850	80	565	3861	3849	-0.204	1794	2067	1665	2184	0
5	9	4	"SPR3"	"YGR059W"	3690	19320	110	2005	1953	1197	90	96	49	97	95	0	3405	3402	2647	41	44	30	95	92	0	0.569	0.554	0.540	0.783	3.353	0.502	0.722	80	582	5279	5224	-0.813	1915	3364	1863	3361	0
5	10	4	"PPA1"	"YHR026W"	3910	19330	110	2388	2255	1282	89	93	31	98	97	0	6153	5733	3605	41	43	23	98	97	0	0.376	0.381	0.399	0.432	2.167	0.345	0.819	80	586	8411	7858	-1.411	2299	6112	2166	5692	0
5	11	4	"YHR056C"	"YHR056C"	4110	19330	110	1420	1480	947	92	99	38	98	96	0	2476	2603	1907	39	43	34	96	91	0	0.545	0.541	0.546	0.682	2.600	0.467	0.780	80	549	3765	3952	-0.876	1328	2437	1388	2564	0
5	12	4	"YHR087W"	"YHR087W"	4300	19320	110	1325	1268	781	95	139	209	82	76	0	3173	2834	2126	42	73	161	86	80	0	0.393	0.420	0.420	0.505	2.848	0.372	0.831	80	558	4361	3965	-1.348	1230	3131	1173	2792	0
5	13	4	"DAP2"	"YHR028C"	4500	19320	110	1703	1563	873	93	100	43	97	93	0	3718	3241	2272	40	46	53	95	92	0	0.438	0.459	0.420	0.585	2.556	0.421	0.785	80	555	5288	4671	-1.192	1610	3678	1470	3201	0
5	14	4	"MED6"	"YHR058C"	4680	19330	100	1890	1707	1001	92	97	36	97	97	0	4636	4694	3515	41	45	34	98	97	0	0.391	0.347	0.345	0.444	2.315	0.303	0.851	80	501	6393	6268	-1.354	1798	4595	1615	4653	0
5	15	4	"GAR1"	"YHR089C"	4900	19320	110	1829	1746	1073	95	100	49	97	95	0	2455	2163	1485	42	46	39	95	92	0	0.719	0.778	0.821	0.972	2.589	0.764	0.756	80	548	4147	3772	-0.477	1734	2413	1651	2121	0
5	16	4	"SLT2"	"YHR030C"	5080	19320	110	2642	3337	2457	96	104	55	100	96	0	2562	3051	2720	41	46	33	97	91	0	1.010	1.077	1.097	1.562	2.601	1.007	0.861	80	543	5067	6251	0.014	2546	2521	3241	3010	0
5	17	4	"VMA22"	"YHR060W"	5290	19320	110	658	689	488	96	103	49	88	83	0	1411	1973	1708	40	44	27	93	90	0	0.410	0.307	0.314	0.421	2.795	0.250	0.691	80	574	1933	2526	-1.287	562	1371	593	1933	0
5	18	4	"MSR1"	"YHR091C"	5500	19320	120	3043	3523	2755	94	98	33	100	99	0	1147	1688	1563	38	42	28	94	91	0	2.659	2.078	1.969	2.469	2.232	2.047	0.792	120	649	4058	5079	1.411	2949	1109	3429	1650	0
5	19	4	"YHR032W"	"YHR032W"	5700	19330	110	1891	1578	775	93	97	36	98	98	0	2806	2343	1353	40	41	24	100	95	0	0.650	0.645	0.647	0.746	2.049	0.602	0.835	80	546	4564	3788	-0.621	1798	2766	1485	2303	0
5	20	4	"RPP1"	"YHR062C"	5920	19320	110	221	244	121	94	100	41	82	66	0	233	331	368	38	40	33	85	77	0	0.651	0.512	0.613	0.627	2.627	0.359	0.369	80	576	322	443	-0.619	127	195	150	293	0
5	21	4	"AHT1"	"YHR093W"	6110	19330	110	1783	1645	873	92	101	70	98	95	0	6345	5457	3378	37	40	34	97	97	0	0.268	0.287	0.296	0.352	2.137	0.262	0.852	80	590	7999	6973	-1.899	1691	6308	1553	5420	0
5	1	5	"PAN1"	"YIR006C"	2100	19520	110	1449	1355	664	89	92	32	100	97	0	4496	3811	2342	41	44	24	98	96	0	0.305	0.336	0.326	0.427	2.275	0.306	0.838	80	588	5815	5036	-1.712	1360	4455	1266	3770	0
5	2	5	"GTT1"	"YIR038C"	2300	19520	110	1757	1611	878	90	96	36	96	95	0	4957	4206	2519	39	46	33	98	95	0	0.339	0.365	0.367	0.404	2.272	0.350	0.824	80	585	6585	5688	-1.561	1667	4918	1521	4167	0
5	3	5	"RNR2"	"YJL026W"	2510	19530	110	971	1029	594	90	94	30	97	95	0	3515	3162	2038	40	43	25	96	92	0	0.254	0.301	0.291	0.361	2.301	0.276	0.840	80	567	4356	4061	-1.980	881	3475	939	3122	0
5	4	5	"PRI1"	"YIR008C"	2700	19520	110	10131	9293	4908	92	99	55	100	100	0	6817	5673	3253	43	48	30	98	97	0	1.482	1.634	1.594	1.942	2.296	1.744	0.793	80	558	16813	14831	0.568	10039	6774	9201	5630	0
5	5	5	"YIR040C"	"YIR040C"	2900	19520	110	7539	6499	3756	91	98	36	100	100	0	11229	10161	6104	42	47	33	98	98	0	0.666	0.633	0.608	0.689	2.404	0.625	0.821	80	577	18635	16527	-0.587	7448	11187	6408	10119	0
5	6	5	"YJL028W"	"YJL028W"	3110	19520	110	700	667	301	91	94	33	100	100	0	2499	2162	1203	39	45	39	98	96	0	0.248	0.271	0.263	0.331	2.347	0.234	0.801	80	575	3069	2699	-2.014	609	2460	576	2123	0
5	7	5	"YIR010W"	"YIR010W"	3300	19520	110	511	501	266	91	93	31	96	91	0	659	585	391	39	45	43	86	81	0	0.677	0.751	0.734	0.845	2.082	0.882	0.574	80	556	1040	956	-0.562	420	620	410	546	0
5	8	5	"YIR042C"	"YIR042C"	3500	19520	110	2908	2525	1465	90	92	27	100	98	0	3390	3036	1968	39	42	23	96	95	0	0.841	0.812	0.803	0.948	2.251	0.775	0.767	80	548	6169	5432	-0.250	2818	3351	2435	2997	0
5	9	5	"MAD2"	"YJL030W"	3690	19530	110	2071	1900	1159	90	94	30	97	93	0	2379	2296	1720	41	45	31	98	90	0	0.847	0.803	0.752	0.968	2.280	0.697	0.843	80	574	4319	4065	-0.239	1981	2338	1810	2255	0
5	10	5	"SQT1"	"YIR012W"	3900	19530	110	7670	6304	3369	89	94	33	100	100	0	4773	4776	3092	41	48	36	98	97	0	1.602	1.313	1.318	1.597	2.128	1.220	0.855	80	566	12313	10950	0.680	7581	4732	6215	4735	0
5	11	5	"YIR044C"	"YIR044C"	4100	19520	110	3109	2604	1665	94	99	37	97	95	0	4970	4389	3004	41	47	34	96	93	0	0.612	0.577	0.560	0.638	2.554	0.549	0.851	80	566	7944	6858	-0.709	3015	4929	2510	4348	0
5	12	5	"YJL032W"	"YJL032W"	4300	19520	110	4102	3710	2360	94	102	61	97	96	0	1735	1561	1022	40	43	22	93	88	0	2.365	2.377	2.375	2.763	2.270	2.614	0.805	80	577	5703	5137	1.242	4008	1695	3616	1521	0
5	13	5	"CAF17"	"YJR122W"	4510	19530	100	606	632	364	94	101	62	90	82	0	1390	1355	927	39	45	53	91	87	0	0.379	0.409	0.401	0.459	2.098	0.347	0.681	80	513	1863	1854	-1.400	512	1351	538	1316	0
5	14	5	"YJR154W"	"YJR154W"	4700	19520	100	498	695	597	90	97	34	93	93	0	1804	2644	2957	39	45	50	96	91	0	0.231	0.232	0.235	0.297	2.685	0.193	0.810	80	505	2173	3210	-2.113	408	1765	605	2605	0
5	15	5	"YKL023W"	"YKL023W"	4910	19520	100	575	807	690	94	99	35	96	90	0	824	1053	1016	39	43	44	97	91	0	0.613	0.703	0.762	0.761	2.488	0.643	0.728	80	513	1266	1727	-0.707	481	785	713	1014	0
5	16	5	"YJR124C"	"YJR124C"	5100	19520	110	2806	3085	2532	93	99	40	100	96	0	1694	1811	1480	39	40	22	93	92	0	1.639	1.688	1.561	1.911	2.298	1.841	0.763	80	568	4368	4764	0.713	2713	1655	2992	1772	0
5	17	5	"THI11"	"YJR156C"	5300	19520	110	4231	3662	2100	94	98	37	100	98	0	7892	6991	4756	39	41	24	100	100	0	0.527	0.513	0.519	0.649	2.345	0.470	0.827	80	568	11990	10520	-0.925	4137	7853	3568	6952	0
5	18	5	"PAN3"	"YKL025C"	5500	19520	110	2806	2980	2227	93	96	30	96	92	0	4382	4155	3351	38	40	21	97	95	0	0.625	0.701	0.646	0.809	2.479	0.661	0.812	80	554	7057	7004	-0.679	2713	4344	2887	4117	0
5	19	5	"YJR126C"	"YJR126C"	5700	19520	110	711	868	649	92	96	34	95	92	0	1713	2077	1823	39	41	24	95	93	0	0.370	0.381	0.386	0.474	2.949	0.343	0.831	80	566	2293	2814	-1.435	619	1674	776	2038	0
5	20	5	"HXT16"	"YJR158W"	5900	19520	110	4490	4211	2825	94	96	30	98	97	0	9985	9873	7696	38	41	21	100	98	0	0.442	0.419	0.443	0.547	2.316	0.387	0.846	80	569	14343	13952	-1.178	4396	9947	4117	9835	0
5	21	5	"YKL027W"	"YKL027W"	6100	19530	110	548	654	433	91	99	65	92	83	0	611	730	631	38	40	21	93	92	0	0.798	0.814	0.850	0.945	2.327	0.730	0.731	80	590	1030	1255	-0.326	457	573	563	692	0
5	1	6	"YJR128W"	"YJR128W"	2100	19730	100	689	727	505	88	92	34	93	90	0	1712	1559	1016	40	43	23	95	90	0	0.359	0.421	0.383	0.445	2.039	0.387	0.682	80	504	2273	2158	-1.476	601	1672	639	1519	0
5	2	6	"YJR160C"	"YJR160C"	2300	19730	110	369	391	212	86	90	36	97	91	0	941	1019	797	38	39	18	96	92	0	0.313	0.311	0.298	0.390	2.517	0.242	0.688	80	576	1186	1286	-1.674	283	903	305	981	0
5	3	6	"MAE1"	"YKL029C"	2500	19730	100	1309	1166	671	91	96	35	93	92	0	4201	4030	2831	41	45	27	90	90	0	0.293	0.269	0.274	0.366	2.292	0.239	0.841	80	507	5378	5064	-1.772	1218	4160	1075	3989	0
5	4	6	"SOF1"	"YLL011W"	2700	19720	110	12363	11957	7608	93	104	62	98	97	0	5664	5233	4020	40	46	30	97	93	0	2.182	2.285	2.303	3.118	2.651	2.398	0.820	80	576	17894	17057	1.125	12270	5624	11864	5193	0
5	5	6	"FPS1"	"YLL043W"	2910	19720	110	4146	4012	2669	86	93	36	98	96	0	4317	4269	3395	40	43	24	95	92	0	0.949	0.928	0.990	1.279	2.441	0.880	0.816	80	574	8337	8155	-0.075	4060	4277	3926	4229	0
5	6	6	"YLR008C"	"YLR008C"	3100	19730	110	1569	1628	1036	88	94	57	91	90	0	1462	1440	1050	40	42	22	96	93	0	1.041	1.100	1.003	1.159	2.365	1.046	0.825	80	567	2903	2940	0.059	1481	1422	1540	1400	0
5	7	6	"YLL013C"	"YLL013C"	3300	19730	110	4905	5276	3162	95	103	74	98	98	0	4605	4386	2982	40	47	49	97	95	0	1.054	1.192	1.081	1.351	2.365	1.104	0.664	80	566	9375	9527	0.075	4810	4565	5181	4346	0
5	8	6	"RPL8B"	"YLL045C"	3500	19720	110	634	627	265	92	100	72	96	88	0	2926	2690	1627	39	44	38	97	95	0	0.188	0.202	0.192	0.234	2.460	0.170	0.733	80	577	3429	3186	-2.413	542	2887	535	2651	0
5	9	6	"YLR010C"	"YLR010C"	3700	19730	110	4732	4186	2524	94	98	34	98	97	0	2026	1959	1463	39	43	26	95	92	0	2.334	2.131	1.927	2.647	2.653	2.010	0.809	80	577	6625	6012	1.223	4638	1987	4092	1920	0
5	10	6	"BPT1"	"YLL015W"	3910	19720	100	294	373	237	92	100	47	90	80	0	249	314	245	39	43	26	95	87	0	0.962	1.022	1.059	1.020	2.067	0.995	0.777	80	504	412	556	-0.056	202	210	281	275	0
5	11	6	"YLL047W"	"YLL047W"	4100	19730	110	658	629	324	91	96	35	92	87	0	2061	1908	1303	38	41	21	97	93	0	0.280	0.288	0.277	0.361	2.352	0.228	0.775	80	575	2590	2408	-1.835	567	2023	538	1870	0
5	12	6	"YLR012C"	"YLR012C"	4300	19720	110	2349	2112	1398	93	95	31	95	88	0	2319	2061	1517	40	43	29	92	87	0	0.990	0.999	0.962	1.292	2.816	1.003	0.843	80	568	4535	4040	-0.015	2256	2279	2019	2021	0
5	13	6	"YLL017W"	"YLL017W"	4500	19730	110	2299	2080	1228	94	101	40	96	91	0	2438	2324	1610	38	43	28	92	90	0	0.919	0.869	0.841	1.122	2.314	0.798	0.872	80	568	4605	4272	-0.122	2205	2400	1986	2286	0
5	14	6	"YLL049W"	"YLL049W"	4700	19730	100	1855	1636	902	91	96	36	92	91	0	2852	2523	1628	39	41	21	93	93	0	0.627	0.622	0.592	0.742	2.059	0.575	0.832	80	512	4577	4029	-0.673	1764	2813	1545	2484	0
5	15	6	"PPR1"	"YLR014C"	4910	19730	110	4464	3822	2105	93	95	34	100	100	0	5324	4907	2938	38	42	29	100	100	0	0.827	0.766	0.724	0.872	1.899	0.736	0.858	80	585	9657	8598	-0.274	4371	5286	3729	4869	0
5	16	6	"YLR327C"	"YLR327C"	5110	19730	100	723	726	358	92	95	32	96	93	0	2532	2034	1257	37	39	21	96	93	0	0.253	0.317	0.318	0.389	2.024	0.279	0.819	80	504	3126	2631	-1.983	631	2495	634	1997	0
5	17	6	"ADE13"	"YLR359W"	5300	19720	110	373	473	360	91	96	38	85	71	0	602	1081	1054	37	40	22	88	86	0	0.499	0.366	0.352	0.445	2.839	0.301	0.682	80	567	847	1426	-1.003	282	565	382	1044	0
5	18	6	"YLR391W"	"YLR391W"	5510	19720	100	560	662	514	90	96	32	93	87	0	1577	1771	1562	37	39	22	93	87	0	0.305	0.330	0.323	0.420	2.255	0.315	0.905	80	507	2010	2306	-1.712	470	1540	572	1734	0
5	19	6	"REC102"	"YLR329W"	5700	19730	100	476	477	283	94	96	31	85	80	0	1830	1878	1406	38	41	28	95	91	0	0.213	0.208	0.199	0.230	2.096	0.177	0.769	80	505	2174	2223	-2.230	382	1792	383	1840	0
5	20	6	"YLR361C"	"YLR361C"	5910	19720	100	434	642	549	96	96	29	95	86	0	1017	1532	1597	39	42	22	96	95	0	0.346	0.366	0.385	0.418	2.208	0.328	0.809	80	513	1316	2039	-1.533	338	978	546	1493	0
5	21	6	"ATP10"	"YLR393W"	6100	19730	100	649	754	622	91	96	34	93	87	0	1294	1595	1557	38	42	27	88	86	0	0.444	0.426	0.431	0.553	2.221	0.376	0.855	80	511	1814	2220	-1.170	558	1256	663	1557	0
5	1	7	"YLR331C"	"YLR331C"	2100	19930	100	1514	1369	670	89	92	30	98	95	0	3592	3292	1929	39	41	22	98	97	0	0.401	0.393	0.363	0.446	2.381	0.330	0.763	80	505	4978	4533	-1.318	1425	3553	1280	3253	0
5	2	7	"NMD4"	"YLR363C"	2310	19930	100	898	1031	685	87	89	28	97	93	0	1587	1568	1048	40	42	21	97	95	0	0.524	0.618	0.551	0.645	2.306	0.587	0.737	80	505	2358	2472	-0.932	811	1547	944	1528	0
5	3	7	"COX8"	"YLR395C"	2510	19930	100	2011	1860	891	92	96	33	100	100	0	3318	2903	1625	39	41	21	100	98	0	0.585	0.617	0.610	0.732	1.968	0.562	0.823	80	498	5198	4632	-0.773	1919	3279	1768	2864	0
5	4	7	"RPS25B"	"YLR333C"	2710	19920	110	1954	1904	1102	94	98	40	97	97	0	3704	3096	1953	39	43	25	97	97	0	0.508	0.592	0.565	0.684	2.455	0.573	0.796	80	569	5525	4867	-0.979	1860	3665	1810	3057	0
5	5	7	"YLR365W"	"YLR365W"	2910	19930	110	572	540	287	90	94	34	91	88	0	2523	2369	1773	38	41	23	97	96	0	0.194	0.193	0.187	0.255	2.614	0.150	0.715	80	566	2967	2781	-2.366	482	2485	450	2331	0
5	6	7	"AFG2"	"YLR397C"	3110	19930	110	1674	1567	932	91	98	60	91	90	0	4182	4240	2994	38	41	25	96	92	0	0.382	0.351	0.322	0.386	2.302	0.295	0.729	80	510	5727	5678	-1.388	1583	4144	1476	4202	0
5	7	7	"YMR097C"	"YMR097C"	3310	19920	110	1102	1180	840	93	98	47	93	93	0	1158	1236	1004	38	41	26	95	92	0	0.901	0.907	0.770	1.080	2.982	0.859	0.654	80	558	2129	2285	-0.151	1009	1120	1087	1198	0
5	8	7	"ECM16"	"YMR128W"	3510	19930	110	266	296	160	92	95	35	92	83	0	692	776	643	40	49	44	91	85	0	0.267	0.277	0.280	0.351	2.760	0.214	0.584	80	567	826	940	-1.906	174	652	204	736	0
5	9	7	"YMR158W"	"YMR158W"	3710	19930	110	642	605	295	93	96	36	91	86	0	1341	1235	890	39	41	24	90	88	0	0.422	0.428	0.410	0.548	2.873	0.346	0.670	80	550	1851	1708	-1.246	549	1302	512	1196	0
5	10	7	"YMR099C"	"YMR099C"	3900	19930	110	578	576	305	92	100	51	92	85	0	1412	1406	942	40	42	25	92	88	0	0.354	0.354	0.376	0.458	3.008	0.296	0.681	80	577	1858	1850	-1.497	486	1372	484	1366	0
5	11	7	"YMR130W"	"YMR130W"	4110	19930	80	394	627	653	92	96	46	80	73	0	229	401	434	39	42	24	73	65	0	1.589	1.478	1.298	1.557	2.825	1.597	0.755	52	340	492	897	0.669	302	190	535	362	0
5	12	7	"APG16"	"YMR159C"	4310	19920	100	431	483	306	90	92	35	92	85	0	1393	1335	1004	39	41	23	93	92	0	0.252	0.303	0.291	0.309	2.531	0.256	0.659	80	508	1695	1689	-1.989	341	1354	393	1296	0
5	13	7	"SRT1"	"YMR101C"	4500	19930	100	3367	3376	2346	91	96	38	98	98	0	1855	1782	1325	41	42	22	97	96	0	1.806	1.887	1.883	2.100	2.440	1.934	0.713	80	500	5090	5026	0.853	3276	1814	3285	1741	0
5	14	7	"YMR132C"	"YMR132C"	4710	19920	100	416	429	233	92	97	46	87	83	0	1396	1297	965	40	42	22	87	83	0	0.239	0.268	0.273	0.347	2.760	0.216	0.650	80	521	1680	1594	-2.065	324	1356	337	1257	0
5	15	7	"HLJ1"	"YMR161W"	4930	19930	110	221	283	231	93	96	42	81	70	0	201	229	201	39	40	20	85	80	0	0.790	1.000	1.023	0.978	3.063	1.248	0.240	80	553	290	380	-0.340	128	162	190	190	0
5	16	7	"YMR103C"	"YMR103C"	5110	19930	100	322	439	340	92	96	32	95	91	0	695	796	646	40	42	23	95	93	0	0.351	0.459	0.421	0.483	2.778	0.401	0.633	80	488	885	1103	-1.510	230	655	347	756	0
5	17	7	"YMR134W"	"YMR134W"	5320	19920	110	675	647	416	89	94	33	96	88	0	2110	1826	1374	39	40	20	93	91	0	0.283	0.312	0.299	0.397	2.759	0.267	0.699	80	587	2657	2345	-1.821	586	2071	558	1787	0
5	18	7	"YMR163C"	"YMR163C"	5530	19920	110	636	657	403	91	94	31	98	93	0	1769	1851	1519	38	40	21	95	93	0	0.315	0.312	0.299	0.454	3.669	0.214	0.498	80	567	2276	2379	-1.667	545	1731	566	1813	0
5	19	7	"YNL144C"	"YNL144C"	5720	19920	110	1845	1824	1235	94	98	33	98	98	0	5550	5407	3788	39	43	30	98	98	0	0.318	0.322	0.345	0.414	2.607	0.312	0.821	80	530	7262	7098	-1.654	1751	5511	1730	5368	0
5	20	7	"YNL176C"	"YNL176C"	5910	19930	110	1751	1711	848	97	101	38	100	100	0	8430	7112	4438	39	45	39	100	100	0	0.197	0.228	0.236	0.294	2.237	0.196	0.791	80	548	10045	8687	-2.343	1654	8391	1614	7073	0
5	21	7	"YNL208W"	"YNL208W"	6110	19930	110	1006	916	479	95	99	36	97	91	0	2732	2176	1416	39	46	65	88	85	0	0.338	0.384	0.388	0.521	2.508	0.343	0.855	80	569	3604	2958	-1.564	911	2693	821	2137	0
5	1	8	"YNL146W"	"YNL146W"	2110	20130	100	876	853	426	89	94	36	95	92	0	2792	2327	1480	41	43	26	96	91	0	0.286	0.334	0.320	0.418	2.544	0.301	0.849	80	506	3538	3050	-1.806	787	2751	764	2286	0
5	2	8	"RPS3"	"YNL178W"	2310	20120	110	1215	1150	622	90	94	32	96	93	0	4442	3461	2131	41	45	27	98	96	0	0.256	0.310	0.324	0.363	2.506	0.290	0.840	80	550	5526	4480	-1.968	1125	4401	1060	3420	0
5	3	8	"MER1"	"YNL210W"	2500	20120	110	1035	1065	690	90	95	33	93	93	0	1925	2209	1775	41	46	29	93	93	0	0.502	0.450	0.432	0.602	3.686	0.398	0.714	80	550	2829	3143	-0.995	945	1884	975	2168	0
5	4	8	"ALF1"	"YNL148C"	2730	20120	110	225	271	175	88	92	32	90	81	0	1023	920	576	38	42	32	92	86	0	0.139	0.207	0.138	0.242	4.022	0.133	0.245	80	581	1122	1065	-2.846	137	985	183	882	0
5	5	8	"RHO5"	"YNL180C"	2920	20120	110	2347	2009	1072	90	95	33	98	98	0	4962	4588	3154	40	45	36	96	93	0	0.459	0.422	0.384	0.534	2.471	0.354	0.757	80	506	7179	6467	-1.125	2257	4922	1919	4548	0
5	6	8	"YNL212W"	"YNL212W"	3110	20110	150	105	140	118	87	90	30	42	27	0	54	115	144	38	41	24	44	32	0	1.125	0.688	0.664	0.751	4.196	0.694	0.293	156	796	34	130	0.170	18	16	53	77	-50
5	7	8	"YNL150W"	"YNL150W"	3320	20120	110	1187	1055	592	87	91	31	97	93	0	2522	2610	1812	37	42	28	97	95	0	0.443	0.376	0.388	0.466	2.597	0.321	0.780	80	555	3585	3541	-1.176	1100	2485	968	2573	0
5	8	8	"YNL182C"	"YNL182C"	3520	20120	100	1685	1506	798	91	100	75	97	90	0	5934	5575	3745	42	85	374	87	85	0	0.271	0.256	0.249	0.333	2.947	0.204	0.707	80	511	7486	6948	-1.886	1594	5892	1415	5533	0
5	9	8	"PEX17"	"YNL214W"	3740	20120	110	1400	1202	635	90	97	69	93	87	0	5307	4399	3199	40	74	352	85	76	0	0.249	0.255	0.261	0.364	2.947	0.206	0.758	80	576	6577	5471	-2.007	1310	5267	1112	4359	0
5	10	8	"MSB4"	"YOL112W"	3940	20120	100	373	492	365	89	93	33	88	83	0	1212	1435	1332	39	44	41	88	87	0	0.242	0.289	0.257	0.357	3.539	0.226	0.597	80	493	1457	1799	-2.046	284	1173	403	1396	0
5	11	8	"NOP8"	"YOL144W"	4130	20120	110	424	472	336	92	96	35	85	76	0	1462	1752	1553	37	43	37	91	86	0	0.233	0.222	0.251	0.288	2.368	0.188	0.648	80	567	1757	2095	-2.102	332	1425	380	1715	0
5	12	8	"TIR2"	"YOR010C"	4340	20120	100	667	673	423	90	96	62	95	87	0	709	733	554	39	43	36	90	82	0	0.861	0.840	0.838	1.005	2.794	0.789	0.671	80	516	1247	1277	-0.216	577	670	583	694	0
5	13	8	"YOL114C"	"YOL114C"	4540	20120	110	341	385	237	90	94	32	91	86	0	1017	1020	737	39	41	22	96	92	0	0.257	0.301	0.260	0.357	3.139	0.236	0.496	80	562	1229	1276	-1.962	251	978	295	981	0
5	14	8	"YOL146W"	"YOL146W"	4740	20120	100	661	621	354	92	97	35	92	87	0	2228	2140	1609	40	45	33	92	90	0	0.260	0.252	0.237	0.311	2.577	0.207	0.737	80	507	2757	2629	-1.943	569	2188	529	2100	0
5	15	8	"YOR012W"	"YOR012W"	4940	20120	110	442	479	306	92	97	34	88	78	0	985	1125	884	39	41	21	90	85	0	0.370	0.356	0.383	0.413	3.351	0.294	0.618	80	559	1296	1473	-1.434	350	946	387	1086	0
5	16	8	"MSN1"	"YOL116W"	5140	20120	100	488	582	372	94	100	50	91	88	0	1781	2123	1739	40	43	39	96	95	0	0.226	0.234	0.221	0.264	2.595	0.187	0.619	80	499	2135	2571	-2.144	394	1741	488	2083	0
5	17	8	"SPT20"	"YOL148C"	5340	20120	100	619	724	510	91	94	31	96	96	0	1406	1534	1336	40	41	22	98	95	0	0.387	0.424	0.430	0.533	2.996	0.355	0.728	80	507	1894	2127	-1.371	528	1366	633	1494	0
5	18	8	"RTS1"	"YOR014W"	5540	20120	100	469	541	335	93	96	30	95	88	0	903	977	699	37	42	79	92	86	0	0.434	0.477	0.440	0.494	2.253	0.423	0.718	80	515	1242	1388	-1.204	376	866	448	940	0
5	19	8	"YOL118C"	"YOL118C"	5750	20110	110	297	305	143	95	100	34	88	80	0	1256	1182	766	38	45	78	90	82	0	0.166	0.184	0.186	0.228	3.469	0.153	0.583	80	579	1420	1354	-2.592	202	1218	210	1144	0
5	20	8	"YOL150C"	"YOL150C"	5950	20110	100	598	633	313	96	99	37	95	91	0	939	873	496	39	43	35	93	93	0	0.558	0.644	0.594	0.656	2.102	0.594	0.730	80	481	1402	1371	-0.842	502	900	537	834	0
5	21	8	"ERP4"	"YOR016C"	6130	20110	110	4368	3710	2295	97	102	49	97	96	0	3772	3636	2810	38	48	69	95	86	0	1.144	1.004	0.975	1.342	2.872	0.923	0.797	80	563	8005	7211	0.194	4271	3734	3613	3598	0
5	1	9	"SCD5"	"YOR329C"	2140	20320	110	10487	9032	4929	94	99	37	100	100	0	8738	7687	4716	41	44	27	98	98	0	1.195	1.169	1.168	1.410	1.946	1.113	0.888	80	557	19090	16584	0.257	10393	8697	8938	7646	0
5	2	9	"PRT1"	"YOR361C"	2340	20320	110	1571	1501	708	91	93	31	100	98	0	4614	4111	2498	42	46	28	98	98	0	0.324	0.347	0.343	0.435	2.138	0.298	0.756	80	560	6052	5479	-1.627	1480	4572	1410	4069	0
5	3	9	"ERR1"	"YOR393W"	2530	20300	110	4921	4063	1931	90	94	32	100	100	0	11332	9676	5501	43	50	32	100	100	0	0.428	0.412	0.395	0.466	2.025	0.379	0.830	80	555	16120	13606	-1.225	4831	11289	3973	9633	0
5	4	9	"YOR331C"	"YOR331C"	2730	20320	100	980	913	424	91	98	51	98	95	0	5141	3886	2481	39	49	64	95	88	0	0.174	0.214	0.220	0.294	2.708	0.185	0.843	80	485	5991	4669	-2.521	889	5102	822	3847	0
5	5	9	"PIP2"	"YOR363C"	2930	20320	110	569	819	832	90	97	41	92	81	0	1026	1573	1661	38	44	32	92	85	0	0.485	0.475	0.513	0.565	2.269	0.436	0.772	80	528	1467	2264	-1.044	479	988	729	1535	0
5	6	9	"HAT1"	"YPL001W"	3130	20320	120	1522	1834	1666	85	91	36	96	95	0	815	981	908	37	41	28	87	81	0	1.847	1.853	1.895	2.116	2.485	1.927	0.850	120	591	2215	2693	0.885	1437	778	1749	944	0
5	7	9	"YOR333C"	"YOR333C"	3340	20320	110	1651	1421	750	87	90	30	100	98	0	4996	4284	2807	38	41	23	97	96	0	0.315	0.314	0.326	0.441	2.535	0.275	0.832	80	518	6522	5580	-1.665	1564	4958	1334	4246	0
5	8	9	"YOR365C"	"YOR365C"	3530	20320	110	1580	1562	981	89	94	35	97	93	0	5171	5113	3928	38	43	31	98	98	0	0.290	0.290	0.321	0.391	2.339	0.253	0.880	80	567	6624	6548	-1.784	1491	5133	1473	5075	0
5	9	9	"ULA1"	"YPL003W"	3730	20320	110	9461	8331	4561	91	95	31	100	100	0	3899	3339	2144	40	43	30	95	93	0	2.428	2.498	2.434	2.973	2.074	2.542	0.860	80	527	13229	11539	1.280	9370	3859	8240	3299	0
5	10	9	"ALA1"	"YOR335C"	3930	20320	110	3519	3256	1849	91	94	31	97	96	0	5659	5543	3857	38	40	23	100	97	0	0.610	0.575	0.584	0.670	2.184	0.497	0.805	80	517	9049	8670	-0.713	3428	5621	3165	5505	0
5	11	9	"SCP1"	"YOR367W"	4120	20320	100	2498	2142	1049	93	100	50	100	98	0	3523	3437	2310	39	41	23	98	98	0	0.690	0.603	0.586	0.743	2.100	0.515	0.837	80	470	5889	5447	-0.535	2405	3484	2049	3398	0
5	12	9	"YPL005W"	"YPL005W"	4330	20320	100	566	693	614	91	99	74	83	77	0	302	351	313	39	41	21	86	77	0	1.806	1.929	1.870	1.783	3.079	2.150	0.748	80	479	738	914	0.853	475	263	602	312	0
5	13	9	"VMA13"	"YPR036W"	4530	20320	100	747	789	577	92	94	33	95	88	0	2800	2722	2001	39	42	23	95	95	0	0.237	0.260	0.246	0.308	2.782	0.215	0.602	80	516	3416	3380	-2.076	655	2761	697	2683	0
5	14	9	"HOS1"	"YPR068C"	4740	20320	100	5971	5316	2780	93	100	41	100	100	0	6236	5678	3926	42	50	49	95	91	0	0.949	0.927	0.910	1.265	2.493	0.834	0.847	80	462	12072	10859	-0.076	5878	6194	5223	5636	0
5	15	9	"YPR100W"	"YPR100W"	4920	20320	100	1188	1235	934	91	102	63	90	86	0	2987	2989	2532	40	54	120	82	77	0	0.372	0.388	0.402	0.564	2.852	0.353	0.850	80	461	4044	4093	-1.426	1097	2947	1144	2949	0
5	16	9	"YPR038W"	"YPR038W"	5130	20320	100	982	933	521	93	110	123	87	80	0	4040	3110	2255	39	70	290	76	70	0	0.222	0.274	0.289	0.427	2.894	0.257	0.880	80	515	4890	3911	-2.170	889	4001	840	3071	0
5	17	9	"MED1"	"YPR070W"	5330	20320	110	1079	1014	553	91	101	105	90	85	0	3624	3604	2673	39	59	260	82	80	0	0.276	0.259	0.277	0.383	2.742	0.215	0.799	80	548	4573	4488	-1.859	988	3585	923	3565	0
5	18	9	"RPL11A"	"YPR102C"	5520	20320	100	1333	1255	734	93	100	41	95	91	0	4162	3437	2299	38	39	19	95	93	0	0.301	0.342	0.352	0.466	2.493	0.320	0.905	80	509	5364	4561	-1.734	1240	4124	1162	3399	0
5	19	9	"YPR040W"	"YPR040W"	5730	20320	100	1682	1501	759	95	99	37	98	96	0	5173	4535	3053	40	44	27	98	96	0	0.309	0.313	0.320	0.411	2.359	0.264	0.818	80	522	6720	5901	-1.694	1587	5133	1406	4495	0
5	20	9	"NOT5"	"YPR072W"	5930	20320	100	2159	2118	1355	90	94	31	100	97	0	2675	2507	1931	37	39	22	98	95	0	0.784	0.821	0.843	1.000	1.984	0.763	0.885	80	523	4707	4498	-0.351	2069	2638	2028	2470	0
5	21	9	"FHL1"	"YPR104C"	6140	20330	110	2493	2544	1389	93	96	32	100	100	0	3921	3618	2462	37	38	19	97	97	0	0.618	0.684	0.743	0.908	2.477	0.579	0.820	80	597	6284	6032	-0.695	2400	3884	2451	3581	0
5	1	10	"YPR042C"	"YPR042C"	2110	20520	150	94	139	161	92	96	37	26	16	0	46	82	119	38	41	22	30	21	0	0.250	1.068	1.222	1.254	3.473	1.577	0.438	156	998	10	91	-2.000	2	8	47	44	-50
5	2	10	"TKL1"	"YPR074C"	2330	20520	110	2767	2468	1383	90	93	31	100	100	0	4167	3408	2324	39	42	23	100	98	0	0.648	0.706	0.688	0.875	2.093	0.660	0.822	80	566	6805	5747	-0.625	2677	4128	2378	3369	0
5	3	10	"ISR1"	"YPR106W"	2530	20520	100	830	752	366	92	93	30	95	90	0	5345	4417	3045	38	42	26	100	96	0	0.139	0.151	0.141	0.198	2.418	0.131	0.837	80	469	6045	5039	-2.846	738	5307	660	4379	0
5	4	10	"EMPTY"	"EMPTY"	2710	20520	150	98	112	79	90	97	45	17	7	0	46	71	109	40	47	52	15	10	0	1.333	0.710	1.261	1.223	3.821	0.916	0.329	156	764	14	53	0.415	8	6	22	31	-50
5	5	10	"EMPTY"	"EMPTY"	2910	20520	150	103	126	86	92	99	51	21	10	0	45	63	79	39	46	55	11	5	0	1.833	1.417	1.549	1.620	3.485	1.289	0.353	156	732	17	58	0.874	11	6	34	24	-50
5	6	10	"EMPTY"	"EMPTY"	3110	20520	150	101	119	110	90	96	38	24	7	0	46	71	98	37	43	36	21	12	0	1.222	0.853	0.923	1.082	4.495	1.108	0.391	156	709	20	63	0.290	11	9	29	34	-50
5	7	10	"EMPTY"	"EMPTY"	3310	20510	150	102	123	106	88	92	32	32	15	0	43	75	98	38	43	31	23	16	0	2.800	0.946	1.322	1.268	3.825	1.121	0.459	156	829	19	72	1.485	14	5	35	37	-50
5	8	10	"EMPTY"	"EMPTY"	3540	20520	90	120	132	50	87	91	32	50	36	0	74	80	71	38	43	30	57	15	0	0.917	1.071	1.107	0.865	3.337	0.917	0.231	52	366	69	87	-0.126	33	36	45	42	0
5	9	10	"EMPTY"	"EMPTY"	3710	20510	150	97	116	77	90	94	30	28	14	0	45	64	75	39	44	31	21	12	0	1.167	1.040	1.277	1.284	3.734	1.383	0.179	156	745	13	51	0.222	7	6	26	25	-50
5	10	10	"EMPTY"	"EMPTY"	3910	20510	150	94	106	48	90	93	30	26	13	0	44	58	60	38	40	24	28	12	0	0.667	0.800	1.148	1.147	3.263	0.879	0.191	156	702	10	36	-0.585	4	6	16	20	-50
5	11	10	"EMPTY"	"EMPTY"	4110	20510	150	99	123	111	92	94	27	28	16	0	45	67	80	38	41	23	26	16	0	1.000	1.069	1.128	1.187	3.375	1.922	0.170	156	704	14	60	0.000	7	7	31	29	-50
5	12	10	"EMPTY"	"EMPTY"	4310	20510	150	92	104	47	91	95	48	14	4	0	44	54	49	38	41	22	23	12	0	0.167	0.813	1.000	1.113	3.416	1.189	0.071	156	856	7	29	-2.585	1	6	13	16	-50
5	13	10	"EMPTY"	"EMPTY"	4560	20510	80	197	281	269	88	97	80	59	40	0	92	160	197	38	40	21	69	55	0	2.019	1.582	1.190	1.396	3.557	1.928	0.463	52	278	163	315	1.013	109	54	193	122	0
5	14	10	"EMPTY"	"EMPTY"	4710	20510	150	110	159	145	91	95	37	39	23	0	50	100	137	38	40	20	41	29	0	1.583	1.097	1.044	1.224	3.192	1.154	0.624	156	760	31	130	0.663	19	12	68	62	-50
5	15	10	"EMPTY"	"EMPTY"	4910	20510	150	100	108	63	91	96	44	16	4	0	40	51	42	37	43	85	6	2	0	3.000	1.214	1.647	1.725	3.889	4.765	0.037	156	824	12	31	1.585	9	3	17	14	-50
5	16	10	"iYAL056W"	"iYAL056W"	5150	20520	100	1725	2003	1518	90	93	29	98	96	0	3482	3274	2576	37	39	19	98	98	0	0.475	0.591	0.593	0.697	1.807	0.539	0.866	80	523	5080	5150	-1.075	1635	3445	1913	3237	0
5	17	10	"iYAL051W"	"iYAL051W"	5350	20510	110	608	594	362	92	97	42	92	83	0	439	447	350	36	39	23	86	81	0	1.280	1.221	1.186	1.441	2.635	1.166	0.751	80	558	919	913	0.357	516	403	502	411	0
5	18	10	"iYAL046C"	"iYAL046C"	5550	20520	100	426	427	226	94	103	49	88	78	0	641	676	605	37	40	28	87	80	0	0.550	0.521	0.558	0.756	2.889	0.372	0.633	80	501	936	972	-0.863	332	604	333	639	0
5	19	10	"iYAL031C"	"iYAL031C"	5740	20520	100	1071	1029	633	94	117	170	86	75	0	2198	1959	1537	41	98	460	70	65	0	0.453	0.487	0.491	0.685	2.357	0.401	0.877	80	497	3134	2853	-1.143	977	2157	935	1918	0
5	20	10	"iYAL027W"	"iYAL027W"	5950	20520	110	2063	2037	1239	93	115	160	93	86	0	1589	1545	1111	38	90	433	76	66	0	1.270	1.290	1.310	1.547	1.912	1.214	0.892	80	568	3521	3451	0.345	1970	1551	1944	1507	0
5	21	10	"iYAL023C"	"iYAL023C"	6140	20520	100	687	652	378	93	104	70	86	78	0	1906	1728	1341	38	70	287	73	66	0	0.318	0.331	0.329	0.436	2.517	0.275	0.838	80	481	2462	2249	-1.653	594	1868	559	1690	0
5	1	11	"iYAL007C"	"iYAL007C"	2130	20720	110	3114	2717	1473	89	95	39	100	100	0	2463	2457	1563	39	43	24	97	95	0	1.248	1.087	1.031	1.311	2.256	1.035	0.780	80	573	5449	5046	0.320	3025	2424	2628	2418	0
5	2	11	"iYAL003W"	"iYAL003W"	2340	20720	110	2449	2353	1344	91	95	34	98	98	0	2721	2512	1790	38	41	21	98	97	0	0.879	0.914	0.858	1.129	2.261	0.819	0.829	80	576	5041	4736	-0.186	2358	2683	2262	2474	0
5	3	11	"iYAR002W"	"iYAR002W"	2540	20720	110	1706	1682	1023	91	94	30	96	96	0	1542	1414	1046	38	40	21	93	93	0	1.074	1.156	1.131	1.481	2.443	1.103	0.810	80	558	3119	2967	0.103	1615	1504	1591	1376	0
5	4	11	"itL(CAA)A"	"itL(CAA)A"	2730	20720	100	1478	1339	754	92	97	36	96	92	0	2787	2509	1696	39	44	32	96	91	0	0.504	0.505	0.508	0.613	2.425	0.447	0.818	80	475	4134	3717	-0.987	1386	2748	1247	2470	0
5	5	11	"iYAR028W"	"iYAR028W"	2930	20720	110	3083	2782	1659	93	96	36	100	97	0	4038	3562	2643	39	45	36	98	96	0	0.748	0.763	0.720	0.965	2.324	0.689	0.838	80	550	6989	6212	-0.419	2990	3999	2689	3523	0
5	6	11	"iYAR035W"	"iYAR035W"	3140	20720	110	585	633	403	89	94	33	95	90	0	1294	1398	1105	38	40	26	96	95	0	0.395	0.400	0.373	0.445	2.313	0.328	0.751	80	549	1752	1904	-1.340	496	1256	544	1360	0
5	7	11	"iYBR162C"	"iYBR162C"	3350	20720	100	614	608	340	87	91	30	98	97	0	2364	2361	1613	37	40	22	100	100	0	0.226	0.224	0.209	0.255	2.361	0.182	0.692	80	500	2854	2845	-2.143	527	2327	521	2324	0
5	8	11	"iYBR165W"	"iYBR165W"	3550	20710	110	746	889	521	92	96	50	97	93	0	1250	1179	768	38	43	55	96	85	0	0.540	0.699	0.683	0.806	2.892	0.702	0.758	80	570	1866	1938	-0.890	654	1212	797	1141	0
5	9	11	"iYBR169C"	"iYBR169C"	3750	20710	100	548	529	315	89	93	33	93	87	0	2039	1906	1434	37	41	25	96	93	0	0.229	0.235	0.215	0.306	2.655	0.189	0.689	80	490	2461	2309	-2.125	459	2002	440	1869	0
5	10	11	"iYBR187W"	"iYBR187W"	3950	20710	110	504	513	281	90	95	37	95	91	0	1845	1573	1061	38	41	26	92	91	0	0.229	0.276	0.254	0.330	2.914	0.250	0.798	80	546	2221	1958	-2.126	414	1807	423	1535	0
5	11	11	"iYBR192W"	"iYBR192W"	4150	20710	100	2515	2211	1150	95	98	30	100	100	0	1995	1696	963	38	41	21	95	95	0	1.237	1.276	1.276	1.403	2.369	1.292	0.793	80	490	4377	3774	0.306	2420	1957	2116	1658	0
5	12	11	"iYBR196C"	"iYBR196C"	4350	20720	100	716	707	390	90	95	32	98	93	0	3441	2960	1916	39	42	24	97	96	0	0.184	0.211	0.203	0.260	2.449	0.177	0.726	80	491	4028	3538	-2.442	626	3402	617	2921	0
5	13	11	"iYBRCdelta19"	"iYBRCdelta19"	4550	20720	100	558	629	420	88	93	30	93	90	0	1944	1889	1445	38	39	19	93	92	0	0.247	0.292	0.277	0.323	3.193	0.252	0.718	80	511	2376	2392	-2.020	470	1906	541	1851	0
5	14	11	"iYBR212W"	"iYBR212W"	4750	20720	110	980	887	491	91	96	34	96	93	0	2190	1972	1303	38	40	20	93	93	0	0.413	0.412	0.432	0.535	2.569	0.358	0.783	80	542	3041	2730	-1.275	889	2152	796	1934	0
5	15	11	"iYBR216C"	"iYBR216C"	4940	20720	100	839	827	432	93	96	30	97	96	0	1494	1405	946	38	39	19	92	90	0	0.512	0.537	0.517	0.702	2.713	0.460	0.773	80	482	2202	2101	-0.965	746	1456	734	1367	0
5	16	11	"iYBR237W"	"iYBR237W"	5130	20720	100	2470	2433	1581	89	93	31	100	100	0	1721	1929	1496	37	39	20	97	96	0	1.414	1.239	1.293	1.506	2.505	1.147	0.688	80	488	4065	4236	0.500	2381	1684	2344	1892	0
5	17	11	"iYBR241C"	"iYBR241C"	5340	20710	100	1046	1003	525	90	95	37	100	97	0	2399	2045	1201	37	41	35	96	92	0	0.405	0.455	0.454	0.564	2.830	0.416	0.813	80	528	3318	2921	-1.305	956	2362	913	2008	0
5	18	11	"iYBR246W"	"iYBR246W"	5540	20720	100	2634	2386	990	93	100	44	100	100	0	2734	2511	1340	36	40	37	100	98	0	0.942	0.926	0.919	1.025	1.904	0.865	0.830	80	514	5239	4768	-0.086	2541	2698	2293	2475	0
5	19	11	"iYDL140C"	"iYDL140C"	5750	20710	100	621	594	320	93	101	50	91	82	0	2362	1973	1316	38	59	187	80	75	0	0.227	0.259	0.262	0.341	2.519	0.228	0.765	80	489	2852	2436	-2.138	528	2324	501	1935	0
5	20	11	"iYDL136W"	"iYDL136W"	5930	20720	100	1026	1016	648	97	106	49	91	90	0	1114	1075	819	40	64	191	72	65	0	0.865	0.888	0.889	1.104	2.678	0.785	0.749	80	502	2003	1954	-0.209	929	1074	919	1035	0
5	21	11	"iYDL133W"	"iYDL133W"	6150	20720	100	192	217	121	96	101	37	81	62	0	380	397	251	38	44	35	90	82	0	0.281	0.337	0.246	0.370	3.527	0.252	0.299	80	515	438	480	-1.833	96	342	121	359	0
5	1	12	"iYDL117W"	"iYDL117W"	2150	20920	110	402	385	205	90	93	29	90	80	0	793	993	828	36	41	33	88	83	0	0.412	0.308	0.288	0.379	2.812	0.238	0.720	80	544	1069	1252	-1.279	312	757	295	957	0
5	2	12	"iYDL113C"	"iYDL113C"	2330	20920	100	516	474	256	90	95	37	93	87	0	1341	1424	1122	38	45	41	91	87	0	0.327	0.277	0.256	0.405	3.259	0.210	0.651	80	496	1729	1770	-1.613	426	1303	384	1386	0
5	3	12	"iYDL109C"	"iYDL109C"	2540	20920	110	833	849	449	89	94	32	97	96	0	2520	2415	1545	39	43	27	96	95	0	0.300	0.320	0.294	0.386	2.566	0.281	0.743	80	566	3225	3136	-1.738	744	2481	760	2376	0
5	4	12	"iYDL090C"	"iYDL090C"	2730	20920	110	931	982	502	93	99	49	97	93	0	2204	2266	1613	39	45	31	96	95	0	0.387	0.399	0.401	0.529	2.465	0.344	0.834	80	531	3003	3116	-1.369	838	2165	889	2227	0
5	5	12	"iYDL086W"	"iYDL086W"	2930	20920	100	755	740	349	92	96	48	98	92	0	2228	2199	1395	38	41	28	96	91	0	0.303	0.300	0.284	0.421	3.085	0.244	0.696	80	510	2853	2809	-1.724	663	2190	648	2161	0
5	6	12	"iYDL082W"	"iYDL082W"	3150	20910	110	1372	1201	568	87	92	38	98	98	0	1563	1304	758	38	39	20	97	96	0	0.843	0.880	0.894	1.031	1.895	0.840	0.884	80	563	2810	2380	-0.247	1285	1525	1114	1266	0
5	7	12	"iYDL065C"	"iYDL065C"	3330	20910	100	694	653	331	87	91	32	96	91	0	1314	1232	817	38	41	23	97	95	0	0.476	0.474	0.449	0.596	2.318	0.388	0.713	80	480	1883	1760	-1.072	607	1276	566	1194	0
5	8	12	"iYDL060W"	"iYDL060W"	3520	20910	100	436	426	192	88	93	53	92	88	0	1069	961	611	38	44	57	92	86	0	0.338	0.366	0.391	0.457	2.352	0.298	0.669	80	508	1379	1261	-1.567	348	1031	338	923	0
5	9	12	"iYDL056W"	"iYDL056W"	3720	20910	100	1706	1645	846	89	93	43	98	95	0	788	754	422	37	39	18	96	95	0	2.153	2.170	2.035	2.251	1.895	2.189	0.878	80	523	2368	2273	1.106	1617	751	1556	717	0
5	10	12	"iYDRWdelta12"	"iYDRWdelta12"	3930	20910	100	1058	982	493	89	92	32	98	97	0	2603	2324	1198	38	39	20	100	98	0	0.378	0.391	0.407	0.428	2.030	0.372	0.836	80	522	3534	3179	-1.404	969	2565	893	2286	0
5	11	12	"iYDR244W"	"iYDR244W"	4130	20910	100	499	486	248	91	95	32	88	88	0	1300	1159	693	38	39	20	91	90	0	0.323	0.352	0.319	0.406	2.233	0.316	0.747	80	528	1670	1516	-1.629	408	1262	395	1121	0
5	12	12	"iYDR248C"	"iYDR248C"	4340	20910	110	1205	1106	523	91	96	33	100	98	0	2327	2110	1014	38	44	90	98	97	0	0.487	0.490	0.477	0.496	1.612	0.470	0.827	80	564	3403	3087	-1.039	1114	2289	1015	2072	0
5	13	12	"itG(GCC)D2"	"itG(GCC)D2"	4530	20910	100	466	465	243	90	93	31	93	88	0	1669	1440	817	38	39	19	97	97	0	0.231	0.267	0.252	0.279	1.987	0.247	0.777	80	479	2007	1777	-2.117	376	1631	375	1402	0
5	14	12	"iYDR265W"	"iYDR265W"	4710	20910	110	1205	1096	551	90	94	34	97	96	0	2253	1992	1054	40	42	22	97	96	0	0.504	0.515	0.497	0.564	2.033	0.491	0.818	80	541	3328	2958	-0.989	1115	2213	1006	1952	0
5	15	12	"iYDR271C"	"iYDR271C"	4920	20920	110	681	622	280	91	95	33	96	90	0	1643	1366	868	38	40	19	93	93	0	0.368	0.400	0.374	0.487	2.240	0.345	0.854	80	588	2195	1859	-1.444	590	1605	531	1328	0
5	16	12	"iYDR286C"	"iYDR286C"	5130	20900	110	928	888	385	91	100	48	98	96	0	3412	2896	1697	39	48	70	93	92	0	0.248	0.279	0.268	0.366	2.585	0.241	0.767	80	575	4210	3654	-2.011	837	3373	797	2857	0
5	17	12	"iYDR292C"	"iYDR292C"	5330	20920	90	618	643	263	94	101	51	98	96	0	1195	1123	667	39	49	79	92	88	0	0.453	0.506	0.502	0.643	2.303	0.412	0.785	52	414	1680	1633	-1.142	524	1156	549	1084	0
5	18	12	"iYDR296W"	"iYDR296W"	5540	20920	100	483	493	230	91	96	32	98	93	0	2481	2136	1241	36	37	17	100	100	0	0.160	0.191	0.173	0.231	2.184	0.165	0.755	80	500	2837	2502	-2.641	392	2445	402	2100	0
5	19	12	"iYDR311W"	"iYDR311W"	5720	20910	110	422	440	210	92	95	33	93	91	0	1234	1184	805	35	37	17	97	92	0	0.275	0.303	0.285	0.380	2.475	0.260	0.717	80	559	1529	1497	-1.861	330	1199	348	1149	0
5	20	12	"iYDR315C"	"iYDR315C"	5930	20920	110	402	393	200	94	98	31	96	92	0	1507	1269	789	37	38	20	98	95	0	0.210	0.243	0.226	0.284	2.119	0.215	0.711	80	556	1778	1531	-2.255	308	1470	299	1232	0
5	21	12	"iYDR317W"	"iYDR317W"	6110	20920	100	1002	918	520	96	105	98	88	83	0	955	1049	786	38	42	30	93	91	0	0.988	0.813	0.795	0.903	2.132	0.721	0.752	80	506	1823	1833	-0.017	906	917	822	1011	0
5	1	13	"itK(CUU)E1"	"itK(CUU)E1"	2120	21120	150	105	114	59	88	92	34	32	12	0	47	59	61	37	41	31	22	10	0	1.700	1.182	1.493	1.386	2.956	0.860	0.240	156	984	27	48	0.766	17	10	26	22	-50
5	2	13	"iYELWdelta6"	"iYELWdelta6"	2340	21120	100	652	628	339	88	95	39	91	86	0	708	664	394	40	45	44	90	87	0	0.844	0.865	0.836	0.916	1.970	0.857	0.847	80	498	1232	1164	-0.244	564	668	540	624	0
5	3	13	"iYEL007W"	"iYEL007W"	2530	21120	100	3424	3109	1464	90	94	35	98	98	0	2649	2284	1152	40	42	23	97	97	0	1.278	1.345	1.314	1.480	1.915	1.357	0.885	80	463	5943	5263	0.354	3334	2609	3019	2244	0
5	4	13	"isnR14"	"isnR14"	2720	21120	150	100	125	80	91	101	60	19	10	0	42	59	51	40	45	32	21	12	0	4.500	1.789	1.350	1.579	3.721	2.472	0.119	156	819	11	53	2.170	9	2	34	19	-50
5	5	13	"iYER010C-1"	"iYER010C-1"	2930	21110	100	1118	1024	521	94	102	60	96	92	0	2339	2141	1454	37	45	58	90	85	0	0.445	0.442	0.435	0.584	2.539	0.389	0.865	80	479	3326	3034	-1.169	1024	2302	930	2104	0
5	6	13	"iYER012W"	"iYER012W"	3120	21120	100	260	280	131	90	99	66	83	60	0	423	486	358	39	47	63	80	75	0	0.443	0.425	0.472	0.585	2.506	0.382	0.586	80	523	554	637	-1.176	170	384	190	447	0
5	7	13	"iYER027C"	"iYER027C"	3350	21120	100	1265	1211	568	87	92	45	100	96	0	2484	2152	1424	37	41	34	97	96	0	0.481	0.531	0.494	0.666	2.356	0.458	0.845	80	520	3625	3239	-1.055	1178	2447	1124	2115	0
5	8	13	"iYER031C"	"iYER031C"	3540	21120	110	617	681	327	88	93	32	98	96	0	2287	1917	1102	38	41	21	98	98	0	0.235	0.316	0.298	0.346	2.026	0.285	0.750	80	558	2778	2472	-2.088	529	2249	593	1879	0
5	9	13	"iYER035W"	"iYER035W"	3730	21120	100	1035	965	552	87	96	75	91	87	0	2383	2295	1665	37	40	24	93	92	0	0.404	0.389	0.390	0.511	2.623	0.329	0.799	80	513	3294	3136	-1.307	948	2346	878	2258	0
5	10	13	"iYERWdelta9"	"iYERWdelta9"	3940	21120	100	216	230	98	89	93	32	86	77	0	391	384	262	37	39	19	92	86	0	0.359	0.406	0.383	0.436	2.803	0.326	0.587	80	529	481	488	-1.479	127	354	141	347	0
5	11	13	"iYER050C"	"iYER050C"	4140	21120	90	144	160	66	93	96	31	73	44	0	153	168	127	37	39	21	75	67	0	0.440	0.511	0.559	0.590	4.128	0.442	0.360	52	420	167	198	-1.186	51	116	67	131	0
5	12	13	"iYER053C-1"	"iYER053C-1"	4340	21120	100	1568	1646	1111	94	95	29	96	95	0	3435	3077	2134	37	40	22	97	96	0	0.434	0.511	0.512	0.585	2.130	0.484	0.844	80	521	4872	4592	-1.205	1474	3398	1552	3040	0
5	13	13	"iYFR048W"	"iYFR048W"	4540	21120	100	862	861	383	91	95	35	98	96	0	1404	1207	620	38	41	23	96	91	0	0.564	0.659	0.664	0.731	1.955	0.626	0.834	80	515	2137	1939	-0.825	771	1366	770	1169	0
5	14	13	"iYFR052W"	"iYFR052W"	4740	21100	100	296	309	135	92	97	38	93	85	0	496	566	374	38	41	28	96	92	0	0.445	0.411	0.432	0.477	2.042	0.351	0.705	80	507	662	745	-1.167	204	458	217	528	0
5	15	13	"iYFR054C-0"	"iYFR054C-0"	4930	21120	110	1279	1352	806	91	94	30	97	95	0	1977	1945	1377	37	40	27	96	96	0	0.612	0.661	0.593	0.740	2.151	0.599	0.830	80	557	3128	3169	-0.708	1188	1940	1261	1908	0
5	16	13	"iYGL257C"	"iYGL257C"	5140	21110	110	658	676	322	93	100	59	93	91	0	2938	2432	1640	38	48	66	95	92	0	0.195	0.244	0.238	0.309	2.604	0.204	0.762	80	584	3465	2977	-2.360	565	2900	583	2394	0
5	17	13	"iYGL256W-3"	"iYGL256W-3"	5330	21110	100	442	459	224	91	99	62	90	85	0	1942	1618	965	37	47	69	92	87	0	0.184	0.233	0.231	0.270	2.212	0.205	0.745	80	513	2256	1949	-2.440	351	1905	368	1581	0
5	18	13	"iYGL252C"	"iYGL252C"	5540	21120	110	1399	1327	587	93	96	32	100	98	0	5239	4469	2651	37	37	17	100	100	0	0.251	0.278	0.271	0.349	2.165	0.248	0.879	80	586	6508	5666	-1.994	1306	5202	1234	4432	0
5	19	13	"iYGL233W"	"iYGL233W"	5750	21110	100	416	412	170	90	94	31	95	90	0	878	771	422	37	39	32	96	87	0	0.388	0.439	0.438	0.482	1.984	0.396	0.795	80	524	1167	1056	-1.367	326	841	322	734	0
5	20	13	"iYGL228W"	"iYGL228W"	5950	21120	110	877	937	442	94	97	29	98	98	0	3077	2582	1351	37	39	20	100	100	0	0.258	0.331	0.307	0.363	1.891	0.297	0.812	80	547	3823	3388	-1.957	783	3040	843	2545	0
5	21	13	"itV(AAC)G3-0"	"itV(AAC)G3-0"	6130	21120	100	2048	1856	830	94	104	102	100	95	0	5981	4585	2503	38	50	100	100	100	0	0.329	0.388	0.363	0.435	1.751	0.352	0.809	80	495	7897	6309	-1.605	1954	5943	1762	4547	0
5	1	14	"iYGL208W"	"iYGL208W"	2140	21310	110	390	387	187	88	92	30	95	87	0	2080	1711	988	38	42	24	98	97	0	0.148	0.179	0.191	0.201	2.555	0.168	0.776	80	566	2344	1972	-2.757	302	2042	299	1673	0
5	2	14	"itH(GUG)G1"	"itH(GUG)G1"	2350	21320	100	354	362	136	89	94	32	96	92	0	574	516	273	39	41	24	100	91	0	0.495	0.572	0.609	0.646	1.925	0.507	0.764	80	514	800	750	-1.014	265	535	273	477	0
5	3	14	"itK(UUU)G1"	"itK(UUU)G1"	2550	21320	110	859	801	304	91	96	36	100	96	0	3694	2966	1539	40	42	25	100	100	0	0.210	0.243	0.235	0.270	2.084	0.212	0.842	80	569	4422	3636	-2.250	768	3654	710	2926	0
5	4	14	"iYGR091W"	"iYGR091W"	2750	21310	100	319	345	238	92	108	95	82	65	0	1367	1233	724	40	46	37	95	91	0	0.171	0.212	0.204	0.220	2.524	0.209	0.588	80	473	1554	1446	-2.547	227	1327	253	1193	0
5	5	14	"iYGR095C"	"iYGR095C"	2940	21310	100	761	700	337	93	108	93	93	82	0	1531	1204	753	41	47	34	95	87	0	0.448	0.522	0.499	0.657	2.905	0.842	0.450	80	513	2158	1770	-1.157	668	1490	607	1163	0
5	6	14	"iYGR099W"	"iYGR099W"	3150	21320	100	277	290	136	92	97	39	87	82	0	1635	1420	841	40	44	27	98	96	0	0.116	0.143	0.134	0.169	2.866	0.121	0.587	80	508	1780	1578	-3.108	185	1595	198	1380	0
5	7	14	"iYGR111W"	"iYGR111W"	3340	21320	100	753	721	366	87	91	30	95	90	0	1762	2319	1818	38	42	24	97	95	0	0.386	0.278	0.260	0.386	2.928	0.217	0.785	80	489	2390	2915	-1.372	666	1724	634	2281	0
5	8	14	"iYGR117C"	"iYGR117C"	3530	21320	110	1162	1163	611	86	93	58	100	96	0	2429	2246	1389	37	41	27	98	97	0	0.450	0.488	0.485	0.586	2.076	0.436	0.787	80	566	3468	3286	-1.153	1076	2392	1077	2209	0
5	9	14	"itN(GUU)G"	"itN(GUU)G"	3740	21320	100	543	556	303	85	93	66	90	83	0	1014	1069	779	36	40	25	93	92	0	0.468	0.456	0.445	0.560	2.403	0.384	0.685	80	522	1436	1504	-1.094	458	978	471	1033	0
5	10	14	"iYGR133W"	"iYGR133W"	3950	21320	100	393	416	203	90	93	30	96	90	0	2088	1863	1097	38	40	21	97	97	0	0.148	0.179	0.161	0.183	2.283	0.151	0.668	80	508	2353	2151	-2.758	303	2050	326	1825	0
5	11	14	"iYGR138C"	"iYGR138C"	4140	21320	110	269	292	159	92	95	32	90	83	0	678	587	408	39	41	21	91	82	0	0.277	0.365	0.294	0.420	3.167	0.281	0.484	80	574	816	748	-1.852	177	639	200	548	0
5	12	14	"iYGR142W"	"iYGR142W"	4350	21320	100	1108	1076	667	90	95	32	96	93	0	1675	1856	1392	39	43	28	96	95	0	0.622	0.543	0.559	0.670	2.452	0.480	0.801	80	513	2654	2803	-0.684	1018	1636	986	1817	0
5	13	14	"iYGR154C"	"iYGR154C"	4550	21320	100	891	831	406	91	93	30	96	93	0	3848	3411	2112	40	44	31	97	95	0	0.210	0.220	0.207	0.283	2.654	0.194	0.853	80	479	4608	4111	-2.251	800	3808	740	3371	0
5	14	14	"iYGR158C"	"iYGR158C"	4730	21320	110	528	536	301	90	95	36	91	87	0	836	784	509	36	39	20	91	87	0	0.548	0.596	0.604	0.684	2.114	0.585	0.795	80	571	1238	1194	-0.869	438	800	446	748	0
5	15	14	"iYGRCdelta30"	"iYGRCdelta30"	4940	21310	110	797	778	400	92	101	53	93	88	0	1544	1435	921	38	45	48	93	90	0	0.468	0.491	0.481	0.581	2.069	0.452	0.805	80	576	2211	2083	-1.095	705	1506	686	1397	0
5	16	14	"iYHR094C"	"iYHR094C"	5140	21320	100	504	513	248	97	103	51	95	90	0	1466	1360	911	39	46	50	91	87	0	0.285	0.315	0.303	0.425	2.716	0.274	0.784	80	529	1834	1737	-1.810	407	1427	416	1321	0
5	17	14	"iYHR098C"	"iYHR098C"	5350	21320	100	858	830	336	92	97	65	97	92	0	4260	3772	2159	37	39	18	100	100	0	0.181	0.198	0.192	0.236	2.122	0.172	0.843	80	495	4989	4473	-2.463	766	4223	738	3735	0
5	18	14	"iYHR102W"	"iYHR102W"	5530	21320	100	592	567	291	94	102	67	90	83	0	1544	1513	1062	38	39	19	96	95	0	0.331	0.321	0.316	0.404	2.410	0.265	0.700	80	494	2004	1948	-1.597	498	1506	473	1475	0
5	19	14	"iYHR119W"	"iYHR119W"	5750	21320	100	682	657	272	91	96	35	97	96	0	2576	2220	1313	36	39	32	97	96	0	0.233	0.259	0.254	0.318	2.112	0.228	0.819	80	518	3131	2750	-2.104	591	2540	566	2184	0
5	20	14	"iYHR123W"	"iYHR123W"	5950	21320	110	2202	2140	990	91	95	31	100	98	0	1370	1265	660	37	37	17	100	98	0	1.584	1.669	1.626	1.771	1.670	1.743	0.851	80	558	3444	3277	0.663	2111	1333	2049	1228	0
5	21	14	"iYHR127W"	"iYHR127W"	6150	21310	100	860	968	581	95	97	30	98	98	0	2214	2089	1408	37	38	18	97	96	0	0.351	0.425	0.427	0.509	2.469	0.403	0.836	80	491	2942	2925	-1.509	765	2177	873	2052	0
5	1	15	"iYHR143W"	"iYHR143W"	2140	21520	100	960	944	469	86	91	33	98	97	0	2007	1876	1266	38	42	24	97	96	0	0.444	0.467	0.425	0.582	2.344	0.389	0.739	80	526	2843	2696	-1.172	874	1969	858	1838	0
5	2	15	"iYHRCdelta11"	"iYHRCdelta11"	2340	21520	110	406	400	179	87	92	34	97	92	0	2320	2007	1256	39	40	19	98	98	0	0.140	0.159	0.157	0.195	2.062	0.138	0.738	80	558	2600	2281	-2.838	319	2281	313	1968	0
5	3	15	"iYHR149C"	"iYHR149C"	2540	21520	100	305	308	144	89	94	57	80	72	0	1012	1008	738	39	43	68	85	75	0	0.222	0.226	0.241	0.314	2.376	0.202	0.546	80	514	1189	1188	-2.171	216	973	219	969	0
5	4	15	"iYHR164C"	"iYHR164C"	2750	21520	100	1089	1003	396	92	95	55	100	97	0	3387	2803	1421	40	46	70	100	100	0	0.298	0.330	0.340	0.355	1.572	0.296	0.831	80	514	4344	3674	-1.747	997	3347	911	2763	0
5	5	15	"iYHR168W"	"iYHR168W"	2940	21520	100	314	336	165	90	95	32	92	83	0	1539	1472	889	38	42	23	96	92	0	0.149	0.172	0.166	0.190	2.551	0.153	0.679	80	505	1725	1680	-2.744	224	1501	246	1434	0
5	6	15	"iYHR173C"	"iYHR173C"	3140	21520	100	224	223	114	89	96	68	76	45	0	751	658	396	37	40	21	92	90	0	0.189	0.216	0.215	0.241	2.797	0.163	0.380	80	497	849	755	-2.403	135	714	134	621	0
5	7	15	"itT(AGU)J"	"itT(AGU)J"	3340	21520	100	465	467	259	89	94	67	88	81	0	1236	1131	767	38	40	20	93	88	0	0.314	0.346	0.305	0.437	2.666	0.302	0.706	80	496	1574	1471	-1.672	376	1198	378	1093	0
5	8	15	"iYJL197W"	"iYJL197W"	3540	21520	110	1082	976	453	87	92	30	98	98	0	2202	1885	1106	37	39	23	98	98	0	0.460	0.481	0.460	0.520	1.685	0.435	0.821	80	576	3160	2737	-1.122	995	2165	889	1848	0
5	9	15	"iYJL192C"	"iYJL192C"	3750	21520	100	427	453	220	87	92	30	97	95	0	2497	2228	1237	37	38	19	98	98	0	0.138	0.167	0.169	0.179	2.087	0.145	0.718	80	484	2800	2557	-2.855	340	2460	366	2191	0
5	10	15	"iYJL173C"	"iYJL173C"	3920	21520	100	367	394	232	87	91	29	93	87	0	794	821	637	37	39	19	96	88	0	0.370	0.392	0.417	0.484	2.234	0.337	0.767	80	475	1037	1091	-1.435	280	757	307	784	0
5	11	15	"iYJL168C"	"iYJL168C"	4150	21520	100	261	306	171	89	92	29	92	87	0	1218	1207	750	37	38	19	93	92	0	0.146	0.185	0.136	0.172	2.461	0.160	0.602	80	489	1353	1387	-2.780	172	1181	217	1170	0
5	12	15	"iYJL164C"	"iYJL164C"	4350	21520	100	758	776	366	88	92	30	100	98	0	3954	3465	1876	37	39	21	100	100	0	0.171	0.201	0.200	0.225	2.082	0.178	0.777	80	454	4587	4116	-2.548	670	3917	688	3428	0
5	13	15	"isnR128"	"isnR128"	4540	21510	100	382	387	200	92	96	32	93	90	0	954	948	654	37	41	24	95	92	0	0.316	0.324	0.334	0.372	2.812	0.267	0.651	80	462	1207	1206	-1.661	290	917	295	911	0
5	14	15	"iYJL146W"	"iYJL146W"	4730	21520	100	1779	1747	1072	94	100	42	100	95	0	2745	3123	2523	39	61	202	85	78	0	0.623	0.536	0.543	0.774	2.689	0.452	0.871	80	480	4391	4737	-0.683	1685	2706	1653	3084	0
5	15	15	"iYJL141C"	"iYJL141C"	4950	21520	100	644	604	306	95	101	46	91	87	0	1779	1683	1159	38	50	115	90	83	0	0.315	0.309	0.298	0.360	2.162	0.266	0.790	80	504	2290	2154	-1.665	549	1741	509	1645	0
5	16	15	"iYJL125C"	"iYJL125C"	5150	21520	80	184	253	239	93	96	28	86	65	0	194	218	165	38	40	20	88	84	0	0.583	0.889	0.685	0.701	3.215	1.388	0.334	52	327	247	340	-0.778	91	156	160	180	0
5	17	15	"iYJL120W"	"iYJL120W"	5360	21510	100	293	307	142	92	95	29	93	85	0	1253	1232	737	37	39	20	98	98	0	0.165	0.180	0.169	0.197	2.368	0.155	0.654	80	473	1417	1410	-2.597	201	1216	215	1195	0
5	18	15	"iYJL115W"	"iYJL115W"	5550	21510	100	962	877	340	93	96	28	100	100	0	2206	1841	977	37	39	20	98	93	0	0.401	0.435	0.414	0.515	1.973	0.379	0.819	80	471	3038	2588	-1.320	869	2169	784	1804	0
5	19	15	"iYKL211C"	"iYKL211C"	5750	21510	100	468	490	255	95	100	39	95	87	0	2277	2025	1103	37	39	24	97	95	0	0.167	0.199	0.200	0.208	2.314	0.185	0.768	80	488	2613	2383	-2.586	373	2240	395	1988	0
5	20	15	"itT(CGU)K"	"itT(CGU)K"	5960	21510	110	729	768	418	94	97	36	96	92	0	1834	1751	1312	38	41	29	98	96	0	0.354	0.393	0.382	0.508	2.430	0.321	0.784	80	558	2431	2387	-1.500	635	1796	674	1713	0
5	21	15	"iYKL205W"	"iYKL205W"	6160	21510	100	810	765	373	96	100	35	97	95	0	2039	1774	948	39	41	27	97	95	0	0.357	0.386	0.407	0.435	1.945	0.372	0.861	80	474	2714	2404	-1.486	714	2000	669	1735	0
5	1	16	"iYKLCdelta2"	"iYKLCdelta2"	2140	21720	100	275	290	137	91	95	36	90	85	0	511	482	254	40	43	27	95	92	0	0.391	0.450	0.423	0.451	2.032	0.416	0.630	80	508	655	641	-1.356	184	471	199	442	0
5	2	16	"iYKL187C"	"iYKL187C"	2350	21710	100	371	422	401	91	95	34	95	92	0	1573	1461	854	41	43	26	97	97	0	0.183	0.233	0.195	0.244	2.541	0.192	0.292	80	499	1812	1751	-2.452	280	1532	331	1420	0
5	3	16	"iYKL183W"	"iYKL183W"	2550	21720	100	280	339	217	85	89	31	95	91	0	942	998	848	39	41	23	93	92	0	0.216	0.265	0.247	0.323	2.651	0.199	0.545	80	482	1098	1213	-2.211	195	903	254	959	0
5	4	16	"iYKL166C-1"	"iYKL166C-1"	2730	21720	100	792	760	353	87	91	31	95	91	0	2455	2068	1261	40	41	22	100	100	0	0.292	0.332	0.340	0.364	2.025	0.281	0.812	80	480	3120	2701	-1.776	705	2415	673	2028	0
5	5	16	"iYKL164C-1"	"iYKL164C-1"	2930	21720	100	196	237	155	91	96	43	76	60	0	970	1084	837	37	41	44	92	86	0	0.113	0.139	0.121	0.152	3.635	0.113	0.456	80	505	1038	1193	-3.151	105	933	146	1047	0
5	6	16	"iYKL162C"	"iYKL162C"	3140	21710	100	342	321	136	88	96	74	83	72	0	1242	1168	727	36	41	44	96	91	0	0.211	0.206	0.207	0.266	2.909	0.172	0.684	80	506	1460	1365	-2.247	254	1206	233	1132	0
5	7	16	"iYKL148C"	"iYKL148C"	3340	21710	100	427	426	193	88	93	68	90	83	0	1008	894	569	37	39	21	96	92	0	0.349	0.394	0.396	0.489	2.637	0.322	0.629	80	490	1310	1195	-1.518	339	971	338	857	0
5	8	16	"iYKL143W"	"iYKL143W"	3540	21720	100	402	385	155	88	91	31	92	91	0	1758	1519	853	36	37	16	97	96	0	0.182	0.200	0.194	0.242	2.410	0.169	0.761	80	498	2036	1780	-2.455	314	1722	297	1483	0
5	9	16	"iYKL139W"	"iYKL139W"	3740	21720	110	3598	3432	1777	91	96	37	100	100	0	1360	1302	946	36	40	32	96	91	0	2.649	2.639	2.504	3.288	2.334	2.449	0.831	80	568	4831	4607	1.405	3507	1324	3341	1266	0
5	10	16	"iYLL025W"	"iYLL025W"	3950	21700	100	1777	1666	726	91	94	34	100	100	0	1562	1302	614	37	41	33	97	95	0	1.106	1.245	1.262	1.399	2.076	1.307	0.803	80	498	3211	2840	0.145	1686	1525	1575	1265	0
5	11	16	"iYLL021W"	"iYLL021W"	4140	21690	110	734	688	322	89	92	27	98	97	0	1081	934	459	36	39	19	96	95	0	0.617	0.667	0.658	0.677	1.942	0.665	0.781	80	535	1690	1497	-0.696	645	1045	599	898	0
5	12	16	"iYLL017W"	"iYLL017W"	4330	21680	110	1642	1584	697	89	93	31	100	98	0	2056	1878	1049	37	39	22	100	100	0	0.769	0.812	0.752	0.906	1.806	0.600	0.594	80	548	3572	3336	-0.379	1553	2019	1495	1841	0
5	13	16	"iYLL001W"	"iYLL001W"	4550	21690	100	3022	2811	1085	93	97	36	100	100	0	1333	1210	708	38	41	25	97	95	0	2.262	2.319	2.158	2.861	2.171	2.225	0.802	80	506	4224	3890	1.177	2929	1295	2718	1172	0
5	14	16	"iYLR003C"	"iYLR003C"	4740	21690	100	750	802	407	94	97	31	97	96	0	853	765	456	39	50	166	81	70	0	0.806	0.975	0.991	1.138	2.435	0.946	0.828	80	480	1470	1434	-0.311	656	814	708	726	0
5	15	16	"iYLR007W"	"iYLR007W"	4940	21690	110	683	710	348	92	97	32	98	93	0	815	790	424	39	49	155	88	82	0	0.762	0.823	0.827	0.920	2.204	0.821	0.794	80	555	1367	1369	-0.393	591	776	618	751	0
5	16	16	"iYLR024C"	"iYLR024C"	5140	21690	100	1342	1265	518	92	96	32	98	98	0	3659	3262	1740	38	40	19	100	100	0	0.345	0.364	0.359	0.408	1.855	0.175	0.439	80	501	4871	4397	-1.534	1250	3621	1173	3224	0
5	17	16	"iYLR028C"	"iYLR028C"	5340	21680	110	333	354	176	92	96	32	97	93	0	782	806	492	38	40	19	98	97	0	0.324	0.341	0.337	0.392	2.505	0.254	0.513	80	556	985	1030	-1.626	241	744	262	768	0
5	18	16	"iYLR032W"	"iYLR032W"	5540	21690	100	735	673	252	90	94	28	100	100	0	1412	1198	594	37	39	19	100	100	0	0.469	0.502	0.479	0.584	2.120	0.453	0.794	80	493	2020	1744	-1.092	645	1375	583	1161	0
5	19	16	"iYLR044C"	"iYLR044C"	5720	21680	90	1587	1532	821	93	103	62	100	100	0	3742	3420	1906	38	47	82	100	98	0	0.403	0.425	0.414	0.485	1.891	0.393	0.855	52	388	5198	4821	-1.310	1494	3704	1439	3382	0
5	20	16	"iYLR048W"	"iYLR048W"	5930	21700	100	719	721	356	89	94	30	98	98	0	1032	941	572	36	37	16	96	95	0	0.633	0.698	0.720	0.795	1.921	0.641	0.837	80	534	1626	1537	-0.661	630	996	632	905	0
5	21	16	"iYLR052W"	"iYLR052W"	6140	21700	100	368	385	199	94	99	39	96	87	0	1139	1051	539	37	40	25	98	96	0	0.249	0.287	0.265	0.284	2.314	0.260	0.646	80	533	1376	1305	-2.008	274	1102	291	1014	0
5	1	17	"iYLR364W"	"iYLR364W"	2130	21900	100	278	290	132	90	94	34	91	82	0	1631	1446	876	40	41	20	98	97	0	0.118	0.142	0.138	0.154	2.628	0.129	0.734	80	498	1779	1606	-3.081	188	1591	200	1406	0
5	2	17	"iYLR369W"	"iYLR369W"	2320	21900	110	877	865	436	91	96	38	97	95	0	2420	2111	1236	42	45	29	100	100	0	0.331	0.374	0.362	0.392	2.471	0.346	0.820	80	572	3164	2843	-1.597	786	2378	774	2069	0
5	3	17	"iYLR373C"	"iYLR373C"	2520	21910	100	287	309	141	88	92	33	92	90	0	965	890	482	38	40	21	100	98	0	0.215	0.259	0.226	0.265	2.423	0.214	0.585	80	513	1126	1073	-2.220	199	927	221	852	0
5	4	17	"iYLR389C"	"iYLR389C"	2720	21910	100	420	419	162	87	92	31	98	97	0	1917	1740	1003	38	41	22	100	98	0	0.177	0.195	0.179	0.236	2.451	0.158	0.748	80	510	2212	2034	-2.496	333	1879	332	1702	0
5	5	17	"iYLR394W"	"iYLR394W"	2920	21910	100	3031	2659	1200	92	100	96	100	98	0	3011	3016	1773	39	43	31	100	100	0	0.989	0.862	0.805	0.967	2.058	0.785	0.800	80	510	5911	5544	-0.016	2939	2972	2567	2977	0
5	6	17	"iYLR398C"	"iYLR398C"	3120	21910	100	495	486	198	93	101	95	97	78	0	1928	1775	871	38	42	31	100	98	0	0.213	0.226	0.231	0.248	2.019	0.200	0.756	80	521	2292	2130	-2.233	402	1890	393	1737	0
5	7	17	"iYLR412W-1"	"iYLR412W-1"	3320	21900	110	786	825	436	89	93	32	100	98	0	2533	2225	1432	37	40	22	100	98	0	0.279	0.336	0.357	0.396	2.032	0.303	0.826	80	580	3193	2924	-1.840	697	2496	736	2188	0
5	8	17	"iYLR417W"	"iYLR417W"	3520	21910	100	1369	1292	452	91	93	32	100	100	0	2495	2206	1068	36	37	16	100	100	0	0.520	0.553	0.521	0.609	1.679	0.488	0.812	80	512	3737	3371	-0.944	1278	2459	1201	2170	0
5	9	17	"iYLRCdelta24"	"iYLRCdelta24"	3720	21910	110	645	622	262	90	93	32	98	98	0	1851	1614	803	36	38	18	100	100	0	0.306	0.337	0.352	0.360	1.909	0.310	0.794	80	582	2370	2110	-1.709	555	1815	532	1578	0
5	10	17	"iYLR436C"	"iYLR436C"	3930	21910	100	277	270	110	90	93	30	95	85	0	1476	1307	661	37	40	26	98	97	0	0.130	0.142	0.138	0.156	2.988	0.115	0.561	80	528	1626	1450	-2.944	187	1439	180	1270	0
5	11	17	"iYLR439W"	"iYLR439W"	4120	21930	110	845	793	309	88	93	32	100	98	0	1176	1013	490	37	39	20	100	97	0	0.665	0.722	0.732	0.827	1.875	0.686	0.819	80	590	1896	1681	-0.589	757	1139	705	976	0
5	12	17	"iYLR444C"	"iYLR444C"	4330	21920	100	746	709	279	89	93	32	100	100	0	2498	2207	1067	38	40	20	100	100	0	0.267	0.286	0.287	0.331	2.088	0.248	0.775	80	527	3117	2789	-1.905	657	2460	620	2169	0
5	13	17	"iYMR130W"	"iYMR130W"	4520	21920	100	1002	968	489	87	95	47	98	97	0	701	680	410	37	40	21	93	93	0	1.378	1.370	1.379	1.514	2.143	1.353	0.789	80	519	1579	1524	0.463	915	664	881	643	0
5	14	17	"iYMR134W"	"iYMR134W"	4720	21920	100	487	540	306	89	94	29	97	96	0	1309	1199	678	37	39	18	98	97	0	0.313	0.388	0.388	0.419	2.199	0.369	0.773	80	527	1670	1613	-1.676	398	1272	451	1162	0
5	15	17	"iYMR138W"	"iYMR138W"	4920	21930	110	1129	1120	458	92	96	30	100	100	0	3974	3353	1679	39	41	23	100	100	0	0.264	0.310	0.313	0.334	1.779	0.272	0.830	80	590	4972	4342	-1.924	1037	3935	1028	3314	0
5	16	17	"iYMR155W"	"iYMR155W"	5120	21930	100	344	351	162	91	94	30	96	90	0	679	666	411	38	42	23	97	95	0	0.395	0.414	0.426	0.480	2.331	0.356	0.699	80	518	894	888	-1.341	253	641	260	628	0
5	17	17	"itM(CAU)M"	"itM(CAU)M"	5320	21930	110	295	306	131	91	94	30	93	90	0	581	543	298	38	40	26	97	95	0	0.376	0.426	0.433	0.456	2.257	0.374	0.682	80	599	747	720	-1.412	204	543	215	505	0
5	18	17	"iYMR161W"	"iYMR161W"	5520	21930	100	5339	4982	1957	91	94	28	100	100	0	3096	2779	1480	38	39	19	100	100	0	1.716	1.784	1.688	2.038	1.966	1.720	0.819	80	500	8306	7632	0.779	5248	3058	4891	2741	0
5	19	17	"iYMR176W"	"iYMR176W"	5700	21930	110	1394	1456	703	91	94	29	100	100	0	2844	2401	1428	37	39	18	100	100	0	0.464	0.577	0.566	0.705	2.280	0.506	0.790	80	585	4110	3729	-1.107	1303	2807	1365	2364	0
5	20	17	"iYMR180C"	"iYMR180C"	5920	21930	100	569	574	228	90	94	35	100	98	0	1700	1482	733	37	38	17	100	100	0	0.288	0.335	0.350	0.364	1.887	0.299	0.811	80	525	2142	1929	-1.796	479	1663	484	1445	0
5	21	17	"iYMR183C"	"iYMR183C"	6110	21930	100	1472	1381	649	91	95	34	100	98	0	2672	2421	1398	36	39	21	100	100	0	0.524	0.541	0.547	0.598	1.884	0.473	0.800	80	524	4017	3675	-0.933	1381	2636	1290	2385	0
5	1	18	"iYMR198W"	"iYMR198W"	2120	22120	110	959	864	464	89	94	37	93	91	0	3151	3036	2010	39	45	29	97	96	0	0.280	0.259	0.253	0.285	2.194	0.231	0.826	80	597	3982	3772	-1.839	870	3112	775	2997	0
5	2	18	"iYMR202W"	"iYMR202W"	2310	22130	100	360	372	192	91	93	32	92	86	0	769	817	461	40	43	24	100	96	0	0.369	0.362	0.365	0.355	2.072	0.346	0.784	80	492	998	1058	-1.438	269	729	281	777	0
5	3	18	"iYMR206W"	"iYMR206W"	2490	22130	100	1638	1536	820	93	95	33	98	98	0	3473	2945	1565	39	42	24	98	97	0	0.450	0.497	0.503	0.556	2.230	0.487	0.872	80	524	4979	4349	-1.152	1545	3434	1443	2906	0
5	4	18	"iYNL148C"	"iYNL148C"	2710	22130	110	325	316	125	91	96	49	90	83	0	1757	1510	788	38	42	23	96	93	0	0.136	0.153	0.152	0.170	2.309	0.138	0.598	80	600	1953	1697	-2.877	234	1719	225	1472	0
5	5	18	"iYNL144C-0"	"iYNL144C-0"	2910	22140	110	1126	1023	488	89	93	35	100	98	0	3649	3324	2062	38	40	20	98	98	0	0.287	0.284	0.276	0.331	2.051	0.237	0.816	80	590	4648	4220	-1.800	1037	3611	934	3286	0
5	6	18	"iYNL141W"	"iYNL141W"	3110	22130	110	3130	2865	1541	91	97	46	100	100	0	3032	2654	1476	38	41	23	100	100	0	1.015	1.060	1.074	1.189	1.679	1.069	0.888	80	584	6033	5390	0.022	3039	2994	2774	2616	0
5	7	18	"iYNL125C"	"iYNL125C"	3310	22130	100	560	579	277	87	92	45	98	96	0	2375	2109	1256	37	40	29	100	98	0	0.202	0.237	0.226	0.274	1.951	0.210	0.789	80	511	2811	2564	-2.305	473	2338	492	2072	0
5	8	18	"iYNL121C"	"iYNL121C"	3500	22130	110	830	794	501	90	95	46	92	83	0	2366	2648	1985	36	39	28	95	92	0	0.318	0.270	0.281	0.318	2.745	0.239	0.809	80	593	3070	3316	-1.655	740	2330	704	2612	0
5	9	18	"iYNL116W"	"iYNL116W"	3720	22130	110	1935	1807	923	89	93	45	100	100	0	2630	2253	1214	36	39	23	98	97	0	0.712	0.775	0.753	0.913	2.106	0.774	0.854	80	580	4440	3935	-0.491	1846	2594	1718	2217	0
5	10	18	"iYNL097C"	"iYNL097C"	3910	22130	110	1315	1163	608	88	94	50	98	96	0	4344	3633	2153	37	38	19	97	97	0	0.285	0.299	0.292	0.357	2.115	0.279	0.846	80	555	5534	4671	-1.812	1227	4307	1075	3596	0
5	11	18	"iYNL094W"	"iYNL094W"	4100	22130	110	1386	1277	665	89	93	36	100	100	0	4734	4101	2322	37	39	22	100	100	0	0.276	0.292	0.287	0.318	1.790	0.275	0.845	80	557	5994	5252	-1.857	1297	4697	1188	4064	0
5	12	18	"iYNL089C"	"iYNL089C"	4310	22130	110	749	791	412	89	93	31	100	98	0	2889	2555	1390	37	39	20	98	98	0	0.231	0.279	0.301	0.309	2.009	0.268	0.828	80	566	3512	3220	-2.111	660	2852	702	2518	0
5	13	18	"iYNL073W"	"iYNL073W"	4500	22130	100	527	492	214	89	92	41	95	90	0	1442	1285	782	37	39	20	98	96	0	0.312	0.323	0.298	0.377	2.314	0.264	0.747	80	505	1843	1651	-1.682	438	1405	403	1248	0
5	14	18	"iYNL069C"	"iYNL069C"	4710	22130	110	735	714	359	90	94	33	100	96	0	3137	2683	1492	38	39	19	98	97	0	0.208	0.236	0.241	0.276	2.266	0.222	0.825	80	575	3744	3269	-2.264	645	3099	624	2645	0
5	15	18	"iYNL065W"	"iYNL065W"	4910	22130	100	3482	3071	1293	92	96	35	100	100	0	3083	2982	1719	38	40	22	100	100	0	1.113	1.012	0.913	1.115	1.787	0.923	0.820	80	506	6435	5923	0.155	3390	3045	2979	2944	0
5	16	18	"itG(GCC)O2"	"itG(GCC)O2"	5120	22130	100	962	913	435	88	93	32	98	97	0	1104	1050	715	37	40	20	96	95	0	0.819	0.814	0.824	1.056	2.335	0.718	0.829	80	505	1941	1838	-0.288	874	1067	825	1013	0
5	17	18	"iYOL019W"	"iYOL019W"	5310	22140	110	6035	5239	2660	88	94	46	100	100	0	3559	3449	2132	37	40	28	100	97	0	1.689	1.510	1.378	1.815	2.068	1.403	0.861	80	554	9469	8563	0.756	5947	3522	5151	3412	0
5	18	18	"iYOL015W"	"iYOL015W"	5520	22130	110	4435	3861	1903	91	96	32	100	100	0	4996	3969	2271	38	42	30	98	98	0	0.876	0.959	0.958	1.074	1.747	0.944	0.877	80	586	9302	7701	-0.191	4344	4958	3770	3931	0
5	19	18	"iYOL001W"	"iYOL001W"	5720	22130	100	1031	1004	492	96	101	42	97	96	0	746	746	433	37	43	36	95	90	0	1.319	1.281	1.184	1.372	2.151	1.256	0.813	80	500	1644	1617	0.399	935	709	908	709	0
5	20	18	"iYOR003W"	"iYOR003W"	5910	22130	110	5347	4928	2702	94	96	35	100	100	0	3715	2997	1738	37	38	18	98	98	0	1.428	1.633	1.635	1.731	1.804	1.684	0.885	80	548	8931	7794	0.514	5253	3678	4834	2960	0
5	21	18	"iYOR007C"	"iYOR007C"	6110	22130	100	1399	1259	590	95	96	30	100	97	0	1443	1416	872	37	39	21	95	95	0	0.927	0.844	0.820	1.035	2.231	0.762	0.769	80	510	2710	2543	-0.109	1304	1406	1164	1379	0
5	1	19	"iYOR018W"	"iYOR018W"	2130	22330	110	5302	5212	2208	91	95	36	100	100	0	3974	3599	1696	38	41	24	100	100	0	1.324	1.438	1.400	1.596	1.725	1.450	0.882	80	567	9147	8682	0.405	5211	3936	5121	3561	0
5	2	19	"iYOR021C"	"iYOR021C"	2310	22330	110	1450	1279	621	88	93	33	100	100	0	2907	2549	1465	38	40	21	100	98	0	0.475	0.474	0.460	0.538	2.083	0.443	0.823	80	555	4231	3702	-1.075	1362	2869	1191	2511	0
5	3	19	"iYOR026W"	"iYOR026W"	2520	22340	110	587	537	244	89	97	69	95	83	0	2112	1837	1087	39	46	102	93	86	0	0.240	0.249	0.246	0.306	2.483	0.218	0.818	80	578	2571	2246	-2.058	498	2073	448	1798	0
[truncated: 2,228,863 more chars]
