# Supplementary material for: Genome-Wide Mapping of the Cohesin Complex in the Yeast Saccharomyces cerevisiae
Source: PLoS Biol. 2004 Jul 27;2(9):e259. doi: 10.1371/journal.pbio.0020259 (PMC490026; doi:10.1371/journal.pbio.0020259)
Supplement: Dataset S34 — Cy3 = genomic DNA; Cy5 = ChIP 4h Rec8-3HA in SK1. (2.6 MB XLS). [file pbio.0020259.sd034.xls]

ATF	1.0
27	43    
"Type=GenePix Results 1.4"
"DateTime=2001/04/04 09:55:35"
"Settings=C:\Documents and Settings\jen\My Documents\cohesins, meiosis\UP3_086.gps"
"GalFile=C:\Documents and Settings\jen\My Documents\cohesinArrayData2\UberPrint3_v2.gal"
"Scanner=GenePix 4000A [46495]"
"Comment=Cy5=4 hr tp meiosis SK1 HongGuo Cy3=total genomic"
"PixelSize=10"
"ImageName=635 nm	532 nm"
"FileName=C:\Documents and Settings\jen\My Documents\cohesins, meiosis\UP3_086B_635_nm.tif	C:\Documents and Settings\jen\My Documents\cohesins, meiosis\UP3_086B_532_nm.tif"
"PMTVolts=740	640"
"ScanPower=100	100"
"FocusPosition=0"
"NormalizationFactor:RatioOfMedians=2.17817"
"NormalizationFactor:RatioOfMeans=2.12514"
"NormalizationFactor:MedianOfRatios=2.12039"
"NormalizationFactor:MeanOfRatios=1.98276"
"NormalizationFactor:RegressionRatio=2.20978"
"JpegImage=C:\Documents and Settings\jen\My Documents\cohesins, meiosis\UP3_086.jpg"
"RatioFormulation=W1/W2 (635 nm/532 nm)"
"Barcode="
"ImageOrigin=1240, 12560"
"JpegOrigin=1680, 13430"
"Creator=GenePix Pro 3.0.6.55"
"Temperature=38.3"
"LaserPower=1.72	1.87"
"LaserOnTime=4155	4157"
"Supplier="
"Block"	"Column"	"Row"	"Name"	"ID"	"X"	"Y"	"Dia."	"F635 Median"	"F635 Mean"	"F635 SD"	"B635 Median"	"B635 Mean"	"B635 SD"	"% > B635+1SD"	"% > B635+2SD"	"F635 % Sat."	"F532 Median"	"F532 Mean"	"F532 SD"	"B532 Median"	"B532 Mean"	"B532 SD"	"% > B532+1SD"	"% > B532+2SD"	"F532 % Sat."	"Ratio of Medians"	"Ratio of Means"	"Median of Ratios"	"Mean of Ratios"	"Ratios SD"	"Rgn Ratio"	"Rgn R�"	"F Pixels"	"B Pixels"	"Sum of Medians"	"Sum of Means"	"Log Ratio"	"F635 Median - B635"	"F532 Median - B532"	"F635 Mean - B635"	"F532 Mean - B532"	"Flags"
1	1	1	"YBL081W"	"YBL081W"	1930	14020	120	1086	1058	505	81	83	23	100	100	0	5076	4356	2347	64	69	79	100	99	0	0.201	0.228	0.225	0.240	1.519	0.218	0.944	120	535	6017	5269	-2.318	1005	5012	977	4292	0
1	2	1	"YBL112C"	"YBL112C"	2120	14010	150	3949	5020	4044	83	85	24	99	98	0	6860	9066	7426	63	66	48	99	98	0	0.569	0.548	0.531	0.524	1.629	0.538	0.943	156	842	10663	13940	-0.814	3866	6797	4937	9003	0
1	3	1	"CDS1"	"YBR029C"	2330	14010	130	344	373	195	84	87	46	95	80	0	639	696	416	63	72	164	83	71	0	0.451	0.457	0.430	0.457	1.957	0.445	0.884	120	697	836	922	-1.148	260	576	289	633	0
1	4	1	"YBL083C"	"YBL083C"	2530	13980	110	257	328	241	84	87	38	83	73	0	333	505	439	63	91	469	37	12	0	0.641	0.552	0.501	0.565	2.696	0.107	0.166	80	571	443	686	-0.642	173	270	244	442	0
1	5	1	"NTH2"	"YBR001C"	2740	13980	120	1342	1702	1366	85	128	661	68	48	0	508	643	475	62	99	494	48	22	0	2.818	2.783	2.657	2.479	1.825	2.402	0.302	120	618	1703	2198	1.495	1257	446	1617	581	0
1	6	1	"RPL4A"	"YBR031W"	2910	13980	110	808	794	417	81	86	41	95	92	0	2074	1886	1191	62	71	109	88	85	0	0.361	0.391	0.398	0.458	1.886	0.359	0.890	80	539	2739	2537	-1.469	727	2012	713	1824	0
1	7	1	"BOI1"	"YBL085W"	3110	13980	90	164	179	63	82	85	28	92	71	0	237	241	107	61	75	155	59	9	0	0.466	0.539	0.588	0.511	2.184	0.480	0.552	52	412	258	277	-1.102	82	176	97	180	0
1	8	1	"COQ1"	"YBR003W"	3320	13980	130	6096	6789	4550	85	94	60	99	97	0	6389	5824	4183	64	78	144	89	87	0	0.950	1.164	1.167	1.322	1.899	1.133	0.933	120	745	12336	12464	-0.073	6011	6325	6704	5760	0
1	9	1	"YBR033W"	"YBR033W"	3530	13970	120	3330	3133	1383	85	98	76	100	99	0	6098	5483	2635	65	77	105	100	99	0	0.538	0.563	0.542	0.592	1.462	0.539	0.932	120	639	9278	8466	-0.895	3245	6033	3048	5418	0
1	10	1	"RPL23A"	"YBL087C"	3730	13970	120	2184	1979	1010	86	89	50	96	95	0	7964	6796	3810	63	89	451	88	85	0	0.266	0.281	0.280	0.364	2.406	0.262	0.906	120	598	9999	8626	-1.913	2098	7901	1893	6733	0
1	11	1	"YBR005W"	"YBR005W"	3930	13960	140	2803	2868	1936	83	85	23	100	100	0	2646	2856	2043	60	76	386	90	76	0	1.052	0.996	1.000	1.077	1.666	0.974	0.955	156	798	5306	5581	0.073	2720	2586	2785	2796	0
1	12	1	"PDX3"	"YBR035C"	4140	13960	120	1862	1550	879	83	85	23	96	95	0	4580	3709	2314	60	58	28	95	94	0	0.394	0.402	0.413	0.494	2.142	0.385	0.948	120	638	6299	5116	-1.345	1779	4520	1467	3649	0
1	13	1	"YCL045C"	"YCL045C"	4340	13960	100	144	154	61	82	84	22	75	66	0	178	195	122	62	60	26	81	75	0	0.534	0.541	0.519	0.531	2.477	0.456	0.534	80	477	178	205	-0.904	62	116	72	133	0
1	14	1	"YCLX04W"	"YCLX04W"	4550	13940	140	1259	1226	724	85	88	34	96	96	0	2546	2680	1814	62	60	30	95	94	0	0.473	0.436	0.443	0.516	1.937	0.411	0.938	156	753	3658	3759	-1.081	1174	2484	1141	2618	0
1	15	1	"YCR023C"	"YCR023C"	4720	13960	120	871	885	440	85	86	24	100	99	0	1447	1492	876	63	62	44	95	94	0	0.568	0.560	0.574	0.625	1.610	0.519	0.909	120	592	2170	2229	-0.816	786	1384	800	1429	0
1	16	1	"YCL047C"	"YCL047C"	4940	13950	110	159	192	114	84	87	26	86	66	0	219	258	189	62	82	454	12	0	0	0.478	0.551	0.503	0.547	2.480	0.039	0.085	80	550	232	304	-1.066	75	157	108	196	0
1	17	1	"YCLX06C"	"YCLX06C"	5130	13950	120	1746	1759	995	85	88	24	99	98	0	3643	3852	2472	63	64	47	96	95	0	0.464	0.442	0.439	0.492	1.862	0.414	0.917	120	663	5241	5463	-1.108	1661	3580	1674	3789	0
1	18	1	"PMP1"	"YCR024C-A"	5360	13930	130	893	762	373	86	88	25	96	94	0	1639	1349	729	63	63	31	93	90	0	0.512	0.526	0.521	0.567	1.826	0.510	0.933	120	755	2383	1962	-0.966	807	1576	676	1286	0
1	19	1	"YCL049C"	"YCL049C"	5540	13910	90	286	447	359	86	89	26	90	86	0	425	697	666	64	66	28	86	80	0	0.554	0.570	0.557	0.583	2.015	0.530	0.895	52	347	561	994	-0.852	200	361	361	633	0
1	20	1	"YCLX08C"	"YCLX08C"	5760	13930	150	666	685	393	86	87	24	97	94	0	2197	2401	1637	63	62	31	96	95	0	0.272	0.256	0.254	0.280	1.684	0.242	0.933	156	946	2714	2937	-1.879	580	2134	599	2338	0
1	21	1	"YCR026C"	"YCR026C"	5940	13930	130	447	454	175	87	90	29	99	95	0	1254	1236	694	65	65	38	97	96	0	0.303	0.313	0.340	0.358	1.966	0.276	0.849	120	745	1549	1538	-1.724	360	1189	367	1171	0
1	1	2	"LRE1"	"YCL051W"	1940	14200	110	276	291	176	83	85	25	88	81	0	381	480	407	64	64	43	83	80	0	0.609	0.500	0.494	0.550	2.227	0.409	0.698	80	500	510	624	-0.716	193	317	208	416	0
1	2	2	"YCLX10C"	"YCLX10C"	2170	14190	130	3818	3503	1671	83	85	24	100	100	0	4331	3843	1803	64	64	35	100	100	0	0.875	0.905	0.876	0.913	1.405	0.918	0.940	120	608	8002	7199	-0.192	3735	4267	3420	3779	0
1	3	2	"FEN2"	"YCR028C"	2360	14210	130	6103	5440	2870	80	83	24	99	97	0	9412	8455	5098	63	71	150	95	93	0	0.644	0.639	0.630	0.764	2.046	0.602	0.936	120	591	15372	13752	-0.634	6023	9349	5360	8392	0
1	4	2	"SHR3"	"YDL212W"	2550	14200	100	996	1041	551	82	84	25	98	98	0	1655	1701	985	63	74	166	95	90	0	0.574	0.585	0.568	0.638	1.920	0.541	0.848	80	480	2506	2597	-0.801	914	1592	959	1638	0
1	5	2	"THI13"	"YDL244W"	2750	14200	120	888	1253	1006	83	123	655	59	36	0	2358	3265	2856	64	74	204	95	85	0	0.351	0.366	0.350	0.382	2.061	0.417	0.528	120	630	3099	4371	-1.511	805	2294	1170	3201	0
1	6	2	"REG1"	"YDR028C"	2940	14190	110	699	651	384	81	84	24	97	93	0	650	634	401	64	66	72	88	78	0	1.055	1.000	0.973	1.034	1.803	0.960	0.766	80	554	1204	1140	0.077	618	586	570	570	0
1	7	2	"YDL214C"	"YDL214C"	3150	14180	100	599	621	290	83	84	23	100	100	0	758	738	321	63	61	29	100	97	0	0.742	0.797	0.803	0.779	1.625	0.802	0.828	80	540	1211	1213	-0.430	516	695	538	675	0
1	8	2	"YDL246C"	"YDL246C"	3380	14180	150	124	147	77	87	96	58	35	17	0	103	146	116	65	74	95	28	16	0	0.974	0.741	0.824	0.885	2.851	0.697	0.514	156	789	75	141	-0.038	37	38	60	81	-50
1	9	2	"RAD28"	"YDR030C"	3540	14180	110	419	543	373	86	87	25	96	93	0	837	1100	793	65	65	42	92	92	0	0.431	0.442	0.412	0.450	1.887	0.440	0.917	80	474	1105	1492	-1.213	333	772	457	1035	0
1	10	2	"YDL216C"	"YDL216C"	3750	14180	120	679	710	472	81	83	23	99	93	0	1318	1530	1267	63	86	438	70	57	0	0.476	0.429	0.415	0.494	2.069	0.306	0.692	120	632	1853	2096	-1.069	598	1255	629	1467	0
1	11	2	"COS7"	"YDL248W"	3950	14160	110	744	729	384	83	85	22	96	95	0	1286	1333	816	60	59	29	93	91	0	0.539	0.507	0.506	0.551	1.804	0.471	0.907	80	540	1887	1919	-0.891	661	1226	646	1273	0
1	12	2	"YDR032C"	"YDR032C"	4150	14160	110	510	497	268	84	87	25	95	91	0	2058	2054	1464	62	64	37	92	91	0	0.213	0.207	0.213	0.253	2.256	0.170	0.810	80	562	2422	2405	-2.228	426	1996	413	1992	0
1	13	2	"YDL218W"	"YDL218W"	4360	14170	120	984	1039	646	84	86	24	100	98	0	2722	3073	2182	62	63	33	97	96	0	0.338	0.317	0.319	0.354	1.914	0.298	0.915	120	624	3560	3966	-1.563	900	2660	955	3011	0
1	14	2	"YRB1"	"YDR002W"	4560	14150	130	901	820	347	85	89	35	96	95	0	2735	2383	1139	62	63	83	94	92	0	0.305	0.317	0.314	0.327	1.552	0.304	0.917	120	636	3489	3056	-1.712	816	2673	735	2321	0
1	15	2	"LYS14"	"YDR034C"	4750	14150	100	1522	1399	707	86	90	30	100	100	0	2694	2700	1469	63	64	35	98	98	0	0.546	0.498	0.486	0.549	1.840	0.468	0.908	80	481	4067	3950	-0.874	1436	2631	1313	2637	0
1	16	2	"MRP1"	"YDR347W"	4970	14150	120	2075	1814	813	84	87	25	100	100	0	4303	3815	1872	64	81	423	94	89	0	0.470	0.461	0.458	0.486	1.585	0.421	0.876	120	634	6230	5481	-1.090	1991	4239	1730	3751	0
1	17	2	"RGA2"	"YDR379W"	5170	14150	130	3944	3592	1992	84	87	23	100	99	0	6149	5205	3148	63	64	47	98	96	0	0.634	0.682	0.692	0.812	2.196	0.658	0.906	120	634	9946	8650	-0.657	3860	6086	3508	5142	0
1	18	2	"YDR411C"	"YDR411C"	5370	14150	120	1622	1902	1384	86	89	24	100	98	0	2652	3618	3013	64	62	23	97	95	0	0.594	0.511	0.536	0.611	2.015	0.469	0.898	120	627	4124	5370	-0.753	1536	2588	1816	3554	0
1	19	2	"YPS7"	"YDR349C"	5570	14150	100	264	277	134	86	88	23	93	86	0	525	491	252	62	60	19	93	93	0	0.384	0.445	0.457	0.463	2.286	0.429	0.779	80	481	641	620	-1.379	178	463	191	429	0
1	20	2	"YRA1"	"YDR381W"	5770	14150	120	1178	1223	746	85	86	22	99	96	0	1865	1725	1204	62	68	125	87	82	0	0.606	0.684	0.680	0.781	1.910	0.648	0.893	120	570	2896	2801	-0.722	1093	1803	1138	1663	0
1	21	2	"YDR413C"	"YDR413C"	5970	14150	130	1269	1169	617	85	87	22	99	98	0	4711	4177	2594	63	68	115	97	94	0	0.255	0.263	0.256	0.297	1.941	0.248	0.925	120	728	5832	5198	-1.973	1184	4648	1084	4114	0
1	1	3	"SBE2"	"YDR351W"	1960	14430	140	2834	3016	1926	82	85	34	100	99	0	8457	8661	5848	64	68	102	99	98	0	0.328	0.341	0.344	0.374	1.717	0.329	0.948	156	781	11145	11531	-1.609	2752	8393	2934	8597	0
1	2	3	"YDR383C"	"YDR383C"	2180	14410	140	3010	2951	1757	81	84	24	100	99	0	5811	5879	3711	64	62	22	99	98	0	0.510	0.494	0.498	0.551	1.741	0.477	0.940	156	735	8676	8685	-0.972	2929	5747	2870	5815	0
1	3	3	"YDR415C"	"YDR415C"	2380	14400	130	1037	1126	678	81	83	24	98	97	0	6622	7100	5057	64	62	24	100	100	0	0.146	0.149	0.149	0.176	1.943	0.136	0.909	120	612	7514	8081	-2.778	956	6558	1045	7036	0
1	4	3	"TRR1"	"YDR353W"	2590	14400	130	1624	1432	696	82	84	24	100	99	0	6914	5945	2928	62	65	65	100	99	0	0.225	0.229	0.234	0.236	1.522	0.225	0.951	120	678	8394	7233	-2.152	1542	6852	1350	5883	0
1	5	3	"EFT2"	"YDR385W"	2790	14410	120	4712	4078	2116	82	84	22	100	100	0	14526	11910	6760	63	67	71	100	100	0	0.320	0.337	0.338	0.369	1.608	0.323	0.945	120	584	19093	15843	-1.643	4630	14463	3996	11847	0
1	6	3	"YDR417C"	"YDR417C"	2990	14390	130	1055	974	549	84	86	23	98	96	0	3194	2973	1811	66	68	63	96	92	0	0.310	0.306	0.299	0.337	1.883	0.299	0.917	120	643	4099	3797	-1.688	971	3128	890	2907	0
1	7	3	"YER097W"	"YER097W"	3170	14400	120	1405	1278	658	87	89	25	99	98	0	2941	2578	1511	66	68	52	99	97	0	0.458	0.474	0.474	0.517	1.717	0.447	0.907	120	615	4193	3703	-1.125	1318	2875	1191	2512	0
1	8	3	"YER128W"	"YER128W"	3390	14390	130	1151	1214	810	87	91	26	92	91	0	3775	3951	2840	66	70	57	89	88	0	0.287	0.290	0.298	0.327	2.387	0.279	0.905	120	511	4773	5012	-1.802	1064	3709	1127	3885	0
1	9	3	"YER160C"	"YER160C"	3580	14390	120	2896	3244	2482	85	88	27	100	96	0	3483	3724	3041	64	65	34	90	88	0	0.822	0.863	0.837	1.048	2.418	0.829	0.867	120	570	6230	6819	-0.282	2811	3419	3159	3660	0
1	10	3	"PRS2"	"YER099C"	3790	14380	120	1803	1703	1138	83	85	26	97	92	0	4493	5005	3730	63	60	24	94	91	0	0.388	0.328	0.334	0.411	2.352	0.308	0.920	120	593	6150	6562	-1.365	1720	4430	1620	4942	0
1	11	3	"YER130C"	"YER130C"	3990	14380	120	2940	2653	1696	85	87	24	100	97	0	4431	3883	2695	63	61	35	94	92	0	0.654	0.672	0.677	0.754	1.973	0.642	0.914	120	603	7223	6388	-0.613	2855	4368	2568	3820	0
1	12	3	"RAD4"	"YER162C"	4180	14380	120	3172	3335	2093	86	88	24	100	100	0	5815	6252	4376	63	63	43	99	97	0	0.537	0.525	0.532	0.618	1.927	0.494	0.921	120	588	8838	9438	-0.898	3086	5752	3249	6189	0
1	13	3	"AST2"	"YER101C"	4370	14370	130	1805	1569	748	84	85	24	100	98	0	4932	4164	2145	62	60	27	99	98	0	0.353	0.362	0.364	0.400	1.777	0.350	0.931	120	615	6591	5587	-1.501	1721	4870	1485	4102	0
1	14	3	"PMD1"	"YER132C"	4570	14370	130	2364	2210	1211	84	86	23	100	100	0	4033	3605	2243	61	62	80	97	95	0	0.574	0.600	0.607	0.707	1.976	0.569	0.934	120	689	6252	5670	-0.801	2280	3972	2126	3544	0
1	15	3	"CHD1"	"YER164W"	4790	14370	130	2423	2238	1129	88	92	31	100	100	0	4819	4679	2732	62	70	92	99	98	0	0.491	0.466	0.461	0.516	1.765	0.436	0.920	120	679	7092	6767	-1.027	2335	4757	2150	4617	0
1	16	3	"SSA4"	"YER103W"	4980	14360	130	1448	1446	892	88	92	31	96	95	0	3465	3812	2765	65	72	65	92	90	0	0.400	0.362	0.362	0.450	1.987	0.331	0.910	120	631	4760	5105	-1.322	1360	3400	1358	3747	0
1	17	3	"YER134C"	"YER134C"	5180	14360	130	394	369	153	86	90	28	95	91	0	2967	2639	1506	63	65	45	95	93	0	0.106	0.110	0.110	0.132	2.092	0.100	0.854	120	676	3212	2859	-3.237	308	2904	283	2576	0
1	18	3	"YER166W"	"YER166W"	5400	14350	110	179	186	85	84	87	24	77	66	0	311	333	245	62	59	18	85	78	0	0.382	0.376	0.378	0.387	2.379	0.329	0.704	80	560	344	373	-1.390	95	249	102	271	0
1	19	3	"AMS1"	"YGL156W"	5610	14340	130	1372	1513	1121	85	87	23	95	95	0	2524	2779	2203	61	62	55	91	90	0	0.523	0.525	0.513	0.577	1.909	0.504	0.908	120	615	3750	4146	-0.936	1287	2463	1428	2718	0
1	20	3	"YGL188C"	"YGL188C"	5780	14340	130	168	180	86	85	87	23	80	69	0	307	320	222	62	69	130	71	47	0	0.339	0.368	0.417	0.415	2.060	0.209	0.434	120	567	328	353	-1.562	83	245	95	258	0
1	21	3	"YGL220W"	"YGL220W"	5980	14350	130	473	535	325	85	87	23	96	91	0	2683	2775	2006	62	65	60	95	94	0	0.148	0.166	0.170	0.192	2.110	0.154	0.874	120	682	3009	3163	-2.756	388	2621	450	2713	0
1	1	4	"RCK1"	"YGL158W"	1980	14630	140	1222	1640	1189	80	83	24	100	98	0	3534	6069	4979	63	61	34	99	98	0	0.329	0.260	0.272	0.290	1.723	0.242	0.932	156	737	4613	7566	-1.604	1142	3471	1560	6006	0
1	2	4	"CDC55"	"YGL190C"	2190	14620	130	2137	1985	1165	81	83	23	100	97	0	4869	4588	2997	64	62	27	98	97	0	0.428	0.421	0.429	0.466	1.925	0.393	0.894	120	610	6861	6428	-1.225	2056	4805	1904	4524	0
1	3	4	"YGL222C"	"YGL222C"	2400	14620	140	345	381	237	81	85	24	87	82	0	2394	3116	2626	65	68	95	87	82	0	0.113	0.098	0.101	0.132	2.776	0.088	0.862	156	733	2593	3351	-3.141	264	2329	300	3051	0
1	4	4	"YGL160W"	"YGL160W"	2600	14620	130	1817	1955	1225	83	86	25	100	98	0	6489	6524	4752	64	68	102	94	90	0	0.270	0.290	0.304	0.372	2.102	0.266	0.914	120	618	8159	8332	-1.890	1734	6425	1872	6460	0
1	5	4	"IME4"	"YGL192W"	2820	14610	130	1587	1807	1206	83	86	24	100	99	0	4728	5378	4172	65	67	68	95	91	0	0.323	0.324	0.336	0.446	2.714	0.293	0.870	120	598	6167	7037	-1.632	1504	4663	1724	5313	0
1	6	4	"YGL224C"	"YGL224C"	2990	14610	130	1599	1501	824	83	86	25	99	99	0	5231	5399	3334	65	65	26	100	100	0	0.293	0.266	0.265	0.294	1.728	0.248	0.897	120	602	6682	6752	-1.769	1516	5166	1418	5334	0
1	7	4	"SUT1"	"YGL162W"	3190	14600	110	860	787	372	85	89	28	98	97	0	4768	4653	2757	67	78	95	98	97	0	0.165	0.153	0.153	0.178	1.804	0.135	0.876	80	461	5476	5288	-2.601	775	4701	702	4586	0
1	8	4	"HOS2"	"YGL194C"	3400	14580	200	3617	3097	1536	86	90	29	98	97	0	6348	5174	2694	65	74	83	94	93	0	0.562	0.589	0.582	0.630	1.731	0.577	0.953	316	1122	9814	8120	-0.831	3531	6283	3011	5109	0
1	9	4	"YGL226W"	"YGL226W"	3590	14600	130	2114	2103	1160	85	86	25	100	99	0	5080	4759	2870	64	68	87	98	97	0	0.405	0.430	0.434	0.492	2.071	0.403	0.904	120	536	7045	6713	-1.306	2029	5016	2018	4695	0
1	10	4	"YGR277C"	"YGR277C"	3800	14590	130	1522	1418	843	83	85	25	95	92	0	7308	6320	4426	62	66	81	90	90	0	0.199	0.213	0.216	0.269	2.506	0.192	0.898	120	628	8685	7593	-2.332	1439	7246	1335	6258	0
1	11	4	"YHL013C"	"YHL013C"	3990	14590	120	5367	5094	2887	85	87	23	100	100	0	6286	5641	3474	63	63	40	100	98	0	0.849	0.898	0.896	1.013	1.938	0.869	0.902	120	576	11505	10587	-0.237	5282	6223	5009	5578	0
1	12	4	"YHL045W"	"YHL045W"	4190	14590	120	4182	3926	2135	85	87	23	100	100	0	8861	7882	4695	63	63	39	100	100	0	0.466	0.491	0.482	0.543	1.884	0.465	0.912	120	573	12895	11660	-1.103	4097	8798	3841	7819	0
1	13	4	"SCW4"	"YGR279C"	4390	14580	130	1068	1018	616	84	86	25	97	95	0	4267	3769	2533	63	62	28	95	93	0	0.234	0.252	0.252	0.290	1.972	0.239	0.891	120	632	5188	4640	-2.095	984	4204	934	3706	0
1	14	4	"RPS20"	"YHL015W"	4590	14580	130	1592	1566	930	83	85	24	100	97	0	2480	2368	1634	63	68	158	90	84	0	0.624	0.643	0.642	0.762	1.916	0.599	0.907	120	616	3926	3788	-0.680	1509	2417	1483	2305	0
1	15	4	"YHL047C"	"YHL047C"	4790	14570	120	2669	2831	1888	85	86	24	100	100	0	4403	4700	3202	62	66	157	95	91	0	0.595	0.592	0.607	0.650	2.088	0.577	0.909	120	605	6925	7384	-0.748	2584	4341	2746	4638	0
1	16	4	"YOR1"	"YGR281W"	5010	14570	120	2080	2029	1305	84	88	28	97	95	0	3087	3015	2052	63	65	49	92	91	0	0.660	0.659	0.679	0.707	2.173	0.636	0.899	120	557	5020	4897	-0.599	1996	3024	1945	2952	0
1	17	4	"YHL017W"	"YHL017W"	5180	14560	130	3715	3404	2099	84	87	25	100	100	0	4447	4198	2923	63	59	18	100	99	0	0.828	0.803	0.817	0.938	1.840	0.757	0.929	120	621	8015	7455	-0.272	3631	4384	3320	4135	0
1	18	4	"YHL049C"	"YHL049C"	5390	14560	120	12598	10729	5320	84	87	24	100	100	0	22745	19310	9707	63	61	27	100	100	0	0.552	0.553	0.556	0.568	1.475	0.543	0.941	120	631	35196	29892	-0.858	12514	22682	10645	19247	0
1	19	4	"YGR283C"	"YGR283C"	5610	14550	130	1057	1130	748	84	87	25	95	93	0	2808	3209	2414	62	65	65	88	87	0	0.354	0.332	0.339	0.379	2.163	0.307	0.901	120	636	3719	4193	-1.497	973	2746	1046	3147	0
1	20	4	"APM2"	"YHL019C"	5800	14550	130	2483	2462	1458	86	88	24	99	98	0	4649	4658	3173	62	65	64	95	95	0	0.523	0.517	0.508	0.568	2.002	0.478	0.895	120	614	6984	6972	-0.936	2397	4587	2376	4596	0
1	21	4	"YHR001W"	"YHR001W"	6000	14540	130	9085	9090	6143	84	88	27	100	100	0	2909	3018	2176	62	64	49	94	93	0	3.162	3.047	3.090	3.523	2.160	3.047	0.899	120	666	11848	11962	1.661	9001	2847	9006	2956	0
1	1	5	"YIL087C"	"YIL087C"	2010	14820	130	1109	983	591	81	83	24	97	95	0	5881	5517	3683	63	61	23	97	97	0	0.177	0.165	0.163	0.188	1.965	0.158	0.921	120	646	6846	6356	-2.501	1028	5818	902	5454	0
1	2	5	"RPI1"	"YIL119C"	2220	14830	140	1138	1220	794	82	84	24	100	98	0	3484	3855	2717	64	65	88	99	97	0	0.309	0.300	0.302	0.316	1.515	0.288	0.935	156	633	4476	4929	-1.695	1056	3420	1138	3791	0
1	3	5	"YIL151C"	"YIL151C"	2390	14820	100	377	420	245	85	87	23	96	93	0	694	827	570	66	68	63	95	86	0	0.465	0.440	0.432	0.484	1.835	0.419	0.860	80	409	920	1096	-1.105	292	628	335	761	0
1	4	5	"YIL089W"	"YIL089W"	2610	14810	140	1133	1375	1091	85	86	24	92	85	0	2532	3211	2843	65	72	106	80	76	0	0.425	0.410	0.410	0.503	2.338	0.384	0.923	156	712	3515	4436	-1.235	1048	2467	1290	3146	0
1	5	5	"YIL121W"	"YIL121W"	2810	14810	120	837	762	402	84	86	24	97	94	0	5525	5338	3347	64	65	33	97	97	0	0.138	0.129	0.135	0.140	1.754	0.121	0.922	120	550	6214	5952	-2.858	753	5461	678	5274	0
1	6	5	"RRD1"	"YIL153W"	3010	14800	130	995	1072	693	81	84	24	95	92	0	3070	3185	2296	65	65	41	91	89	0	0.304	0.318	0.319	0.347	1.938	0.303	0.944	120	600	3919	4111	-1.717	914	3005	991	3120	0
1	7	5	"YIL091C"	"YIL091C"	3210	14800	120	4699	4532	3112	83	86	27	96	96	0	6135	6018	4503	65	74	96	91	89	0	0.760	0.747	0.749	0.900	2.284	0.715	0.931	120	572	10686	10402	-0.395	4616	6070	4449	5953	0
1	8	5	"SIM1"	"YIL123W"	3420	14800	130	2574	2450	1500	86	88	27	98	97	0	6005	6143	4250	65	68	56	98	97	0	0.419	0.389	0.392	0.446	1.779	0.365	0.947	120	578	8428	8442	-1.255	2488	5940	2364	6078	0
1	9	5	"GUT2"	"YIL155C"	3580	14790	110	1744	1560	966	87	91	46	95	91	0	4241	4073	2775	64	77	129	90	86	0	0.397	0.367	0.354	0.409	2.032	0.343	0.931	80	464	5834	5482	-1.334	1657	4177	1473	4009	0
1	10	5	"YIL093C"	"YIL093C"	3800	14790	120	1548	1552	896	84	88	38	95	95	0	2986	3176	1988	63	70	107	95	89	0	0.501	0.472	0.475	0.530	1.954	0.454	0.939	120	625	4387	4581	-0.998	1464	2923	1468	3113	0
1	11	5	"KGD1"	"YIL125W"	4000	14790	110	3087	2913	1479	85	86	23	100	98	0	5295	4744	2627	63	64	51	98	96	0	0.574	0.604	0.619	0.674	1.680	0.577	0.950	80	485	8234	7509	-0.801	3002	5232	2828	4681	0
1	12	5	"YIL157C"	"YIL157C"	4200	14790	120	2054	1928	1091	83	85	22	100	98	0	4707	4352	2762	66	69	91	97	96	0	0.425	0.430	0.440	0.494	1.574	0.411	0.959	120	589	6612	6131	-1.236	1971	4641	1845	4286	0
1	13	5	"YJR026W"	"YJR026W"	4410	14780	130	2312	3725	3560	83	85	23	96	95	0	4106	5204	5203	65	67	84	90	85	0	0.552	0.709	0.775	0.884	2.078	0.687	0.941	120	633	6270	8781	-0.858	2229	4041	3642	5139	0
1	14	5	"APS2"	"YJR058C"	4610	14770	130	571	679	522	82	84	23	83	79	0	1737	1924	1693	63	72	164	73	66	0	0.292	0.321	0.331	0.388	2.511	0.304	0.918	120	594	2163	2458	-1.775	489	1674	597	1861	0
1	15	5	"JSN1"	"YJR091C"	4790	14770	110	208	232	101	80	83	24	95	93	0	501	559	345	61	71	175	85	68	0	0.291	0.305	0.304	0.332	1.853	0.267	0.769	80	500	568	650	-1.781	128	440	152	498	0
1	16	5	"YJR028W"	"YJR028W"	5000	14770	120	2264	3168	2867	82	85	24	98	98	0	3070	4203	3916	62	59	24	95	94	0	0.725	0.745	0.744	0.830	1.839	0.732	0.952	120	605	5190	7227	-0.463	2182	3008	3086	4141	0
1	17	5	"CBF1"	"YJR060W"	5220	14770	100	196	213	118	82	86	24	83	72	0	287	298	207	63	61	29	80	76	0	0.509	0.557	0.565	0.499	2.067	0.507	0.751	80	470	338	366	-0.974	114	224	131	235	0
1	18	5	"FIP1"	"YJR093C"	5400	14760	120	335	404	281	83	86	23	93	89	0	532	660	544	62	62	34	95	90	0	0.536	0.537	0.552	0.566	1.930	0.511	0.911	120	603	722	919	-0.899	252	470	321	598	0
1	19	5	"YJR030C"	"YJR030C"	5620	14730	110	627	749	550	89	92	33	96	92	0	1145	1342	1072	63	69	76	92	83	0	0.497	0.516	0.506	0.558	2.001	0.286	0.513	80	505	1620	1939	-1.008	538	1082	660	1279	0
1	20	5	"NTA1"	"YJR062C"	5800	14750	120	1005	1007	605	87	90	31	95	91	0	573	587	381	63	67	63	84	78	0	1.800	1.756	1.713	1.862	1.884	1.703	0.909	120	573	1428	1444	0.848	918	510	920	524	0
1	21	5	"RPL43B"	"YJR094W-A"	6010	14730	120	798	853	607	86	89	26	89	87	0	1986	2201	1827	64	61	22	87	84	0	0.370	0.359	0.360	0.445	2.345	0.334	0.915	120	639	2634	2904	-1.433	712	1922	767	2137	0
1	1	6	"CPR7"	"YJR032W"	2020	15010	120	573	545	333	79	82	25	83	81	0	2319	2109	1538	66	66	88	85	81	0	0.219	0.228	0.223	0.256	2.416	0.207	0.849	120	623	2747	2509	-2.189	494	2253	466	2043	0
1	2	6	"CCT5"	"YJR064W"	2230	15010	130	2834	2557	1728	80	85	25	100	98	0	5451	5618	4062	63	64	93	95	91	0	0.511	0.446	0.443	0.496	1.995	0.426	0.909	120	556	8142	8032	-0.968	2754	5388	2477	5555	0
1	3	6	"YJR096W"	"YJR096W"	2420	15020	120	1147	1285	896	83	86	25	99	96	0	3362	3366	2607	63	60	26	96	96	0	0.323	0.364	0.374	0.423	2.251	0.344	0.926	120	559	4363	4505	-1.633	1064	3299	1202	3303	0
1	4	6	"YKR021W"	"YKR021W"	2630	15010	120	1292	1426	1041	83	87	45	95	90	0	2099	2065	1673	65	67	58	86	84	0	0.594	0.672	0.673	0.830	2.443	0.631	0.905	120	578	3243	3343	-0.751	1209	2034	1343	2000	0
1	5	6	"YSR3"	"YKR053C"	2830	15000	110	853	885	703	83	84	23	86	80	0	1280	1683	1593	67	69	61	76	73	0	0.635	0.496	0.465	0.561	2.219	0.449	0.884	80	498	1983	2418	-0.656	770	1213	802	1616	0
1	6	6	"MRPL20"	"YKR085C"	3020	15000	120	351	458	360	82	83	23	90	84	0	517	824	829	65	67	58	84	75	0	0.595	0.495	0.536	0.553	2.230	0.424	0.800	120	580	721	1135	-0.749	269	452	376	759	0
1	7	6	"YKR023W"	"YKR023W"	3220	14990	120	6004	5777	4024	81	84	24	99	96	0	5156	5081	3945	65	66	43	90	89	0	1.163	1.136	1.124	1.324	2.067	1.083	0.909	120	635	11014	10712	0.218	5923	5091	5696	5016	0
1	8	6	"RHO4"	"YKR055W"	3450	15000	90	199	266	164	83	85	27	88	75	0	293	418	346	63	65	45	88	78	0	0.504	0.515	0.506	0.518	2.160	0.434	0.685	52	354	346	538	-0.988	116	230	183	355	0
1	9	6	"YKR087C"	"YKR087C"	3610	14990	120	1266	1194	716	84	88	40	91	88	0	3454	3055	1990	64	68	88	89	88	0	0.349	0.371	0.386	0.438	2.768	0.354	0.914	120	605	4572	4101	-1.520	1182	3390	1110	2991	0
1	10	6	"RPC37"	"YKR025W"	3840	14990	120	1058	987	554	80	83	23	97	95	0	4865	4622	3297	63	61	22	97	97	0	0.204	0.199	0.203	0.243	1.987	0.177	0.900	120	560	5780	5466	-2.296	978	4802	907	4559	0
1	11	6	"RPS21A"	"YKR057W"	4010	14970	120	520	560	407	83	86	22	83	78	0	1830	2371	2090	64	66	51	85	80	0	0.247	0.207	0.208	0.265	2.626	0.190	0.876	120	575	2203	2784	-2.015	437	1766	477	2307	0
1	12	6	"YKR089C"	"YKR089C"	4230	14970	110	258	264	160	84	85	23	76	72	0	411	473	405	67	72	98	72	62	0	0.506	0.443	0.435	0.463	1.996	0.352	0.712	80	522	518	586	-0.983	174	344	180	406	0
1	13	6	"YKR027W"	"YKR027W"	4430	14980	120	3284	2896	1920	85	87	27	98	97	0	5214	5438	3914	64	71	97	95	90	0	0.621	0.523	0.520	0.589	2.056	0.500	0.907	120	565	8349	8185	-0.687	3199	5150	2811	5374	0
1	14	6	"TIF1"	"YKR059W"	4620	14970	120	668	658	420	81	85	28	91	85	0	3226	3386	2519	62	64	50	93	91	0	0.186	0.174	0.176	0.194	2.191	0.162	0.911	120	567	3751	3901	-2.430	587	3164	577	3324	0
1	15	6	"SRL3"	"YKR091W"	4830	14970	120	1184	1293	916	79	81	23	92	89	0	2698	2693	2096	62	59	20	87	85	0	0.419	0.461	0.469	0.531	2.326	0.437	0.908	120	599	3741	3845	-1.254	1105	2636	1214	2631	0
1	16	6	"YLR232W"	"YLR232W"	5030	14950	120	2159	2132	1411	83	84	22	95	92	0	1796	1642	1201	63	63	44	88	81	0	1.198	1.298	1.274	1.399	2.208	1.239	0.918	120	533	3809	3628	0.261	2076	1733	2049	1579	0
1	17	6	"RPS28B"	"YLR264W"	5220	14970	120	684	663	353	82	84	22	96	95	0	2200	1951	1235	62	63	43	93	92	0	0.282	0.308	0.305	0.345	1.836	0.288	0.906	120	570	2740	2470	-1.828	602	2138	581	1889	0
1	18	6	"ATP14"	"YLR295C"	5420	14950	110	699	672	248	83	85	23	100	100	0	2300	1953	864	61	63	37	96	95	0	0.275	0.311	0.312	0.365	2.012	0.291	0.915	80	499	2855	2481	-1.862	616	2239	589	1892	0
1	19	6	"TOP3"	"YLR234W"	5610	14950	120	680	716	438	86	88	25	93	91	0	2611	2857	2263	62	62	34	93	90	0	0.233	0.225	0.228	0.308	2.407	0.199	0.890	120	627	3143	3425	-2.101	594	2549	630	2795	0
1	20	6	"YLR266C"	"YLR266C"	5810	14940	110	666	621	341	84	87	24	90	87	0	1618	1589	1059	63	66	52	86	83	0	0.374	0.352	0.351	0.416	2.434	0.263	0.742	80	525	2137	2063	-1.418	582	1555	537	1526	0
1	21	6	"YLR297W"	"YLR297W"	6020	14940	120	580	584	335	84	86	23	93	89	0	2752	2763	1907	65	67	61	90	86	0	0.185	0.185	0.187	0.208	2.030	0.173	0.910	120	685	3183	3198	-2.438	496	2687	500	2698	0
1	1	7	"YLR236C"	"YLR236C"	2040	15220	140	415	443	291	80	83	25	84	80	0	1075	1263	1019	64	64	34	81	80	0	0.331	0.303	0.302	0.335	1.857	0.281	0.884	156	819	1346	1562	-1.594	335	1011	363	1199	0
1	2	7	"SEC22"	"YLR268W"	2260	15220	140	900	965	730	80	86	66	82	78	0	3161	3824	3279	63	61	30	91	87	0	0.265	0.235	0.242	0.277	2.275	0.219	0.893	156	628	3918	4646	-1.918	820	3098	885	3761	0
1	3	7	"ECM38"	"YLR299W"	2440	15210	130	3185	4177	3486	82	87	70	90	85	0	4782	5693	4986	63	63	67	84	82	0	0.658	0.727	0.712	0.941	2.473	0.705	0.879	120	545	7822	9725	-0.605	3103	4719	4095	5630	0
1	4	7	"YLR238W"	"YLR238W"	2640	15210	120	12740	11246	5662	83	86	45	100	100	0	9970	9020	4951	65	69	86	98	98	0	1.278	1.247	1.247	1.379	1.692	1.227	0.926	120	545	22562	20118	0.354	12657	9905	11163	8955	0
1	5	7	"YLR270W"	"YLR270W"	2830	15210	120	3101	3114	1971	80	83	23	98	96	0	5917	5683	4000	67	65	23	97	95	0	0.516	0.540	0.546	0.642	2.020	0.505	0.898	120	595	8871	8650	-0.953	3021	5850	3034	5616	0
1	6	7	"YLR301W"	"YLR301W"	3040	15210	120	1724	1515	860	79	83	24	98	98	0	5159	4794	2945	66	72	88	95	91	0	0.323	0.304	0.309	0.336	1.947	0.293	0.920	120	551	6738	6164	-1.630	1645	5093	1436	4728	0
1	7	7	"MPT1"	"YMR005W"	3210	15200	110	9760	9679	6255	82	99	148	96	93	0	3216	3214	2249	65	72	69	93	88	0	3.071	3.048	3.002	3.537	2.099	3.007	0.906	80	504	12829	12746	1.619	9678	3151	9597	3149	0
1	8	7	"MIH1"	"YMR036C"	3440	15190	120	427	444	283	82	89	56	78	74	0	755	728	549	65	66	39	80	77	0	0.500	0.546	0.540	0.552	2.191	0.509	0.819	120	618	1035	1025	-1.000	345	690	362	663	0
1	9	7	"YMR067C"	"YMR067C"	3630	15190	120	329	352	183	83	86	23	92	89	0	850	774	503	64	65	49	90	84	0	0.313	0.379	0.392	0.427	2.155	0.350	0.843	120	550	1032	979	-1.676	246	786	269	710	0
1	10	7	"YMR007W"	"YMR007W"	3830	15190	120	1249	1295	816	81	85	24	94	91	0	1783	1903	1340	63	64	49	88	87	0	0.679	0.660	0.681	0.748	2.286	0.621	0.885	120	536	2888	3054	-0.558	1168	1720	1214	1840	0
1	11	7	"LYS7"	"YMR038C"	4020	15190	120	401	389	210	82	85	23	90	84	0	2848	3187	2475	64	65	35	93	91	0	0.115	0.098	0.105	0.131	2.284	0.085	0.844	120	555	3103	3430	-3.126	319	2784	307	3123	0
1	12	7	"YMR069W"	"YMR069W"	4230	15180	120	175	196	104	85	87	27	72	60	0	622	671	516	64	63	28	84	80	0	0.161	0.183	0.209	0.222	2.891	0.165	0.639	120	583	648	718	-2.632	90	558	111	607	0
1	13	7	"YMR009W"	"YMR009W"	4420	15180	120	1204	1239	809	85	86	27	96	93	0	2534	2447	1794	63	63	41	90	85	0	0.453	0.484	0.487	0.560	2.258	0.450	0.877	120	583	3590	3538	-1.143	1119	2471	1154	2384	0
1	14	7	"YMR040W"	"YMR040W"	4650	15160	100	634	716	515	84	85	28	83	80	0	1492	1623	1348	62	62	28	80	77	0	0.385	0.405	0.407	0.486	2.464	0.363	0.859	80	488	1980	2193	-1.379	550	1430	632	1561	0
1	15	7	"YMR071C"	"YMR071C"	4850	15170	130	818	985	742	84	85	24	90	88	0	2145	2869	2460	63	63	51	84	81	0	0.353	0.321	0.349	0.390	2.460	0.298	0.863	120	593	2816	3707	-1.504	734	2082	901	2806	0
1	16	7	"HXT2"	"YMR011W"	5030	15160	130	6943	6648	4207	84	86	23	100	100	0	5904	5701	4082	62	63	47	98	94	0	1.174	1.164	1.198	1.441	1.938	1.114	0.913	120	598	12701	12203	0.232	6859	5842	6564	5639	0
1	17	7	"ARG80"	"YMR042W"	5230	15160	120	899	857	507	83	87	24	93	90	0	2439	2444	1682	63	63	42	92	88	0	0.343	0.325	0.342	0.410	2.007	0.305	0.916	120	557	3192	3155	-1.542	816	2376	774	2381	0
1	18	7	"YMR073C"	"YMR073C"	5440	15160	130	551	586	351	84	87	23	93	90	0	1777	2178	1661	62	63	38	93	90	0	0.272	0.237	0.248	0.295	2.339	0.211	0.873	120	650	2182	2618	-1.877	467	1715	502	2116	0
1	19	7	"YNL047C"	"YNL047C"	5630	15150	130	1660	1657	1031	85	86	22	98	95	0	4241	3934	2684	63	65	53	92	90	0	0.377	0.406	0.425	0.497	2.208	0.382	0.895	120	601	5753	5443	-1.407	1575	4178	1572	3871	0
1	20	7	"YNL080C"	"YNL080C"	5840	15150	120	4618	4591	3063	84	86	24	100	99	0	3288	3462	2450	65	70	72	95	92	0	1.407	1.327	1.363	1.557	2.297	1.317	0.898	120	607	7757	7904	0.492	4534	3223	4507	3397	0
1	21	7	"DBP2"	"YNL112W"	6040	15150	130	967	1107	788	82	84	24	95	95	0	2264	3078	2530	64	63	41	90	88	0	0.402	0.340	0.351	0.411	2.284	0.310	0.885	120	669	3085	4039	-1.314	885	2200	1025	3014	0
1	1	8	"SFB2"	"YNL049C"	2050	15420	120	448	498	366	79	82	23	85	81	0	793	994	885	64	63	31	82	80	0	0.506	0.451	0.473	0.485	1.892	0.412	0.879	120	592	1098	1349	-0.982	369	729	419	930	0
1	2	8	"PMS1"	"YNL082W"	2240	15410	130	2647	2813	1986	80	83	24	98	97	0	3519	4023	3251	65	64	28	96	93	0	0.743	0.691	0.705	0.896	2.018	0.644	0.937	120	595	6021	6691	-0.428	2567	3454	2733	3958	0
1	3	8	"YNL114C"	"YNL114C"	2450	15410	130	754	742	481	80	84	25	92	88	0	3881	4039	2987	67	77	161	86	84	0	0.177	0.167	0.168	0.177	2.091	0.158	0.929	120	643	4488	4634	-2.500	674	3814	662	3972	0
1	4	8	"YNL051W"	"YNL051W"	2660	15410	120	2830	2477	1141	83	85	24	100	100	0	6531	5538	2711	67	75	156	99	99	0	0.425	0.438	0.449	0.456	1.446	0.427	0.960	120	588	9211	7865	-1.235	2747	6464	2394	5471	0
1	5	8	"END3"	"YNL084C"	2870	15410	120	1528	1614	1236	83	85	26	95	90	0	2400	3027	2541	68	68	44	87	85	0	0.620	0.517	0.526	0.652	2.401	0.491	0.910	120	527	3777	4490	-0.690	1445	2332	1531	2959	0
1	6	8	"YNL116W"	"YNL116W"	3050	15400	130	2155	2576	2003	83	91	50	90	88	0	4603	6131	5247	68	89	134	81	80	0	0.457	0.411	0.420	0.581	2.645	0.384	0.916	120	569	6607	8556	-1.130	2072	4535	2493	6063	0
1	7	8	"MSG5"	"YNL053W"	3250	15390	120	4301	3944	2649	84	102	138	90	85	0	7085	6595	4743	68	93	136	86	84	0	0.601	0.591	0.600	0.722	2.319	0.567	0.924	120	613	11234	10387	-0.735	4217	7017	3860	6527	0
1	8	8	"YNL086W"	"YNL086W"	3470	15390	130	2426	2258	1503	85	89	29	92	91	0	4703	4469	3203	68	71	50	88	86	0	0.505	0.494	0.492	0.579	2.389	0.476	0.930	120	634	6976	6574	-0.985	2341	4635	2173	4401	0
1	9	8	"DCP2"	"YNL118C"	3650	15380	110	2384	2142	1365	88	96	48	91	88	0	5764	6141	4529	68	86	127	88	86	0	0.403	0.338	0.352	0.417	2.231	0.302	0.913	80	489	7992	8127	-1.311	2296	5696	2054	6073	0
1	10	8	"CMK2"	"YOL016C"	3840	15370	110	593	760	614	85	91	41	87	76	0	715	1064	973	68	82	123	72	68	0	0.785	0.678	0.720	0.847	2.635	0.636	0.890	80	487	1155	1671	-0.349	508	647	675	996	0
1	11	8	"YOL048C"	"YOL048C"	4030	15370	130	1076	1330	1064	85	95	55	83	78	0	1741	2408	2112	68	85	97	77	74	0	0.592	0.532	0.543	0.610	2.374	0.502	0.916	120	659	2664	3585	-0.755	991	1673	1245	2340	0
1	12	8	"YOL080C"	"YOL080C"	4250	15360	110	1326	1191	719	84	99	67	90	83	0	3579	3118	2130	67	97	161	83	81	0	0.354	0.363	0.361	0.438	2.231	0.333	0.919	80	519	4754	4158	-1.500	1242	3512	1107	3051	0
1	13	8	"TLG2"	"YOL018C"	4440	15370	120	2589	2787	1970	84	88	41	94	89	0	4191	4331	3296	64	72	129	86	84	0	0.607	0.633	0.654	0.724	2.114	0.603	0.897	120	564	6632	6970	-0.720	2505	4127	2703	4267	0
1	14	8	"YOL050C"	"YOL050C"	4650	15370	120	948	810	461	83	84	23	92	88	0	2170	1819	1212	62	61	31	87	84	0	0.410	0.414	0.421	0.499	2.063	0.389	0.932	120	556	2973	2484	-1.285	865	2108	727	1757	0
1	15	8	"YOL082W"	"YOL082W"	4820	15360	120	3735	3571	2540	85	86	24	98	97	0	2459	2723	2176	62	63	47	90	85	0	1.523	1.310	1.377	1.643	2.036	1.247	0.924	120	551	6047	6147	0.607	3650	2397	3486	2661	0
1	16	8	"TAT2"	"YOL020W"	5040	15360	130	2277	2392	1566	84	86	24	99	97	0	3946	4466	3131	62	64	41	96	94	0	0.565	0.524	0.526	0.580	1.908	0.503	0.926	120	644	6077	6712	-0.825	2193	3884	2308	4404	0
1	17	8	"SPE2"	"YOL052C"	5240	15360	120	509	518	340	82	85	23	92	85	0	3799	4131	3011	64	63	35	94	94	0	0.114	0.107	0.114	0.121	2.208	0.104	0.880	120	529	4162	4503	-3.129	427	3735	436	4067	0
1	18	8	"YOL084W"	"YOL084W"	5430	15360	120	2017	2080	1244	85	88	27	99	98	0	3194	3186	2147	65	65	33	99	96	0	0.617	0.639	0.663	0.753	1.791	0.606	0.930	120	558	5061	5116	-0.696	1932	3129	1995	3121	0
1	19	8	"YOL022C"	"YOL022C"	5650	15340	130	4684	4412	2751	85	89	36	99	98	0	3012	2855	1934	65	68	46	92	89	0	1.561	1.551	1.518	1.779	2.006	1.516	0.916	120	647	7546	7117	0.642	4599	2947	4327	2790	0
1	20	8	"YOL053W"	"YOL053W"	5860	15350	130	1357	1399	815	84	87	33	99	98	0	4683	4633	3130	64	64	39	99	97	0	0.276	0.288	0.296	0.350	2.363	0.263	0.898	120	600	5892	5884	-1.859	1273	4619	1315	4569	0
1	21	8	"ADH1"	"YOL086C"	6040	15330	130	799	809	532	84	86	23	96	92	0	3015	3169	2451	65	63	23	95	92	0	0.242	0.234	0.242	0.298	2.235	0.214	0.901	120	648	3665	3829	-2.045	715	2950	725	3104	0
1	1	9	"RPL33B"	"YOR234C"	2050	15620	120	2852	2975	1835	79	82	24	99	98	0	3756	3810	2528	66	63	20	98	98	0	0.751	0.774	0.783	0.853	2.159	0.741	0.877	120	606	6463	6640	-0.412	2773	3690	2896	3744	0
1	2	9	"PNT1"	"YOR266W"	2230	15620	120	390	410	255	80	83	25	90	82	0	369	440	325	68	64	21	85	77	0	1.030	0.887	0.874	0.977	2.596	0.805	0.754	120	511	611	702	0.043	310	301	330	372	0
1	3	9	"YOR298W"	"YOR298W"	2430	15610	120	304	345	224	81	84	25	89	85	0	388	426	331	67	74	156	65	51	0	0.695	0.735	0.729	0.743	2.348	0.657	0.762	120	580	544	623	-0.526	223	321	264	359	0
1	4	9	"DFR1"	"YOR236W"	2640	15610	130	921	1063	756	83	84	24	98	96	0	2237	3115	2636	69	79	158	89	85	0	0.387	0.322	0.337	0.422	2.469	0.286	0.865	120	664	3006	4026	-1.371	838	2168	980	3046	0
1	5	9	"YOR268C"	"YOR268C"	2850	15600	120	265	295	170	81	84	24	84	80	0	1113	1284	1004	67	69	54	87	83	0	0.176	0.176	0.182	0.210	2.706	0.154	0.777	120	514	1230	1431	-2.507	184	1046	214	1217	0
1	6	9	"YOR300W"	"YOR300W"	3030	15600	120	846	921	617	81	84	27	90	89	0	1164	1414	1148	68	72	65	83	77	0	0.698	0.624	0.622	0.786	2.682	0.552	0.862	120	564	1861	2186	-0.519	765	1096	840	1346	0
1	7	9	"YOR238W"	"YOR238W"	3240	15600	120	644	638	402	81	84	24	95	91	0	3791	3760	2737	67	68	51	95	92	0	0.151	0.151	0.155	0.171	2.329	0.139	0.864	120	582	4287	4250	-2.726	563	3724	557	3693	0
1	8	9	"VPH1"	"YOR270C"	3440	15590	120	627	670	474	82	84	23	90	87	0	977	1300	1108	66	67	42	80	79	0	0.598	0.476	0.462	0.560	2.840	0.420	0.817	120	557	1456	1822	-0.741	545	911	588	1234	0
1	9	9	"YOR302W"	"YOR302W"	3660	15590	120	260	287	168	85	91	45	80	65	0	489	600	457	68	76	85	75	68	0	0.416	0.380	0.375	0.420	2.238	0.350	0.788	120	557	596	734	-1.266	175	421	202	532	0
1	10	9	"YOR240W"	"YOR240W"	3840	15580	120	4955	4458	3124	82	85	30	99	95	0	3675	3640	2866	67	68	36	93	90	0	1.351	1.225	1.191	1.429	2.085	1.157	0.893	120	600	8481	7949	0.434	4873	3608	4376	3573	0
1	11	9	"YTM1"	"YOR272W"	4040	15570	110	2789	2518	1351	82	87	40	100	97	0	4245	3850	2104	67	73	60	95	92	0	0.648	0.644	0.664	0.735	2.036	0.634	0.899	80	562	6885	6219	-0.626	2707	4178	2436	3783	0
1	12	9	"YOR304C-A"	"YOR304C-A"	4280	15580	130	1417	1520	1059	83	91	55	90	90	0	1556	1707	1238	67	78	127	86	84	0	0.896	0.876	0.847	0.880	1.825	0.861	0.911	120	648	2823	3077	-0.159	1334	1489	1437	1640	0
1	13	9	"GRE1"	"YPL223C"	4440	15570	130	1133	1100	666	82	84	23	98	93	0	4729	4371	2796	65	63	22	97	96	0	0.225	0.236	0.229	0.258	2.035	0.228	0.918	120	525	5715	5324	-2.150	1051	4664	1018	4306	0
1	14	9	"BBP1"	"YPL255W"	4650	15570	120	836	838	491	81	83	23	97	95	0	5755	5919	4066	64	63	30	98	96	0	0.133	0.129	0.131	0.156	2.272	0.121	0.920	120	563	6446	6612	-2.914	755	5691	757	5855	0
1	15	9	"YPR004C"	"YPR004C"	4870	15570	130	1582	1540	1039	81	85	29	93	90	0	2139	2367	1838	63	63	31	90	87	0	0.723	0.633	0.614	0.714	2.298	0.585	0.925	120	574	3577	3763	-0.468	1501	2076	1459	2304	0
1	16	9	"YPL225W"	"YPL225W"	5030	15560	120	1526	1403	735	81	85	28	98	96	0	2353	2146	1223	63	61	21	99	97	0	0.631	0.635	0.636	0.681	1.704	0.612	0.934	120	517	3735	3405	-0.664	1445	2290	1322	2083	0
1	17	9	"YPL257W"	"YPL257W"	5240	15550	120	597	590	363	83	86	23	90	84	0	1283	1284	939	65	67	89	83	79	0	0.422	0.416	0.408	0.469	1.878	0.391	0.910	120	559	1732	1726	-1.245	514	1218	507	1219	0
1	18	9	"ICL2"	"YPR006C"	5440	15550	120	2913	2765	1813	87	90	29	96	95	0	5166	4791	3515	67	75	153	85	84	0	0.554	0.567	0.560	0.741	2.265	0.537	0.951	120	535	7925	7402	-0.851	2826	5099	2678	4724	0
1	19	9	"ALG5"	"YPL227C"	5630	15540	130	853	762	452	93	132	158	77	70	0	3865	3203	2118	70	148	305	85	78	0	0.200	0.214	0.221	0.247	1.907	0.216	0.838	120	653	4555	3802	-2.320	760	3795	669	3133	0
1	20	9	"APM1"	"YPL259C"	5860	15550	120	3168	2899	1700	86	114	137	93	89	0	4885	4210	2812	67	116	249	87	83	0	0.640	0.679	0.661	0.824	1.878	0.644	0.956	120	568	7900	6956	-0.645	3082	4818	2813	4143	0
1	21	9	"YPR008W"	"YPR008W"	6050	15540	120	4970	5061	3587	87	88	22	100	100	0	4714	4551	3449	66	65	36	93	91	0	1.051	1.109	1.139	1.452	2.048	1.079	0.971	120	610	9531	9459	0.071	4883	4648	4974	4485	0
1	1	10	"YPL229W"	"YPL229W"	2050	15830	130	2796	2636	1629	80	83	24	100	98	0	7999	7419	5356	67	65	27	96	95	0	0.342	0.348	0.341	0.418	2.153	0.315	0.902	120	681	10648	9908	-1.546	2716	7932	2556	7352	0
1	2	10	"YPL261C"	"YPL261C"	2250	15810	140	367	384	217	83	85	25	91	84	0	1284	1575	1177	69	65	21	91	89	0	0.234	0.200	0.190	0.221	2.200	0.179	0.844	156	668	1499	1807	-2.097	284	1215	301	1506	0
1	3	10	"RPA135"	"YPR010C"	2470	15810	120	4984	5129	3213	82	84	23	99	99	0	6186	6000	3884	67	66	28	99	99	0	0.801	0.851	0.854	0.983	1.949	0.834	0.910	120	598	11021	10980	-0.320	4902	6119	5047	5933	0
1	4	10	"SEC7"	"YDR170C"	2670	15810	100	134	179	131	82	83	23	68	51	0	143	215	235	69	70	72	51	30	0	0.703	0.664	0.673	0.717	2.888	0.512	0.616	80	398	126	243	-0.509	52	74	97	146	-100
1	5	10	"YRF1-1"	"YDR545W"	2830	15800	150	92	126	140	81	82	22	35	23	0	75	124	224	68	72	84	8	7	0	1.571	0.804	0.889	0.961	3.601	0.510	0.616	156	776	18	101	0.652	11	7	45	56	-100
1	6	10	"SWI4"	"YER111C"	3080	15790	90	128	167	111	82	83	23	69	48	0	120	183	186	69	69	54	44	32	0	0.902	0.746	0.714	0.646	3.278	0.510	0.496	52	412	97	199	-0.149	46	51	85	114	-100
1	7	10	"ESP1"	"YGR098C"	3270	15770	80	115	168	161	78	82	25	59	44	0	90	176	256	67	65	23	48	30	0	1.609	0.826	0.857	0.854	3.658	0.555	0.465	52	271	60	199	0.686	37	23	90	109	-100
1	8	10	"RIM101"	"YHL027W"	3430	15780	150	100	119	71	80	83	23	45	28	0	81	114	117	66	66	29	30	17	0	1.333	0.813	0.941	0.867	3.524	0.448	0.264	156	673	35	87	0.415	20	15	39	48	-100
1	9	10	"MIP6"	"YHR015W"	3630	15780	150	94	122	104	81	83	22	38	23	0	75	125	188	66	65	28	25	16	0	1.444	0.695	1.000	0.919	4.341	0.475	0.520	156	755	22	100	0.531	13	9	41	59	-100
1	10	10	"VTH1"	"YIL173W"	3860	15770	90	136	197	212	82	86	26	73	50	0	125	289	528	67	65	21	76	61	0	0.931	0.518	0.565	0.627	3.259	0.369	0.680	52	407	112	337	-0.103	54	58	115	222	-100
1	11	10	"YJR029W"	"YJR029W"	4050	15760	80	151	211	178	83	85	25	71	55	0	95	273	404	67	67	26	51	42	0	2.429	0.621	0.600	0.906	3.621	0.402	0.606	52	340	96	334	1.280	68	28	128	206	-100
1	12	10	"YLL034C"	"YLL034C"	4240	15770	80	132	171	130	80	82	23	75	53	0	98	178	197	67	65	25	55	42	0	1.677	0.820	1.057	1.097	3.691	0.614	0.515	52	323	83	202	0.746	52	31	91	111	-100
1	13	10	"ESC1"	"YMR219W"	4430	15760	150	95	121	83	82	84	23	40	28	0	79	128	165	67	66	37	28	18	0	1.083	0.639	0.824	0.962	3.335	0.455	0.573	156	665	25	100	0.115	13	12	39	61	-50
1	14	10	"YKU70"	"YMR284W"	4630	15760	150	92	111	75	81	84	25	34	17	0	68	102	142	66	67	45	15	10	0	5.500	0.833	0.782	1.126	4.081	0.435	0.463	156	644	13	66	2.459	11	2	30	36	-50
1	15	10	"POL1"	"YNL102W"	4830	15760	150	90	110	69	81	84	27	32	14	0	74	116	199	66	64	23	30	16	0	1.125	0.580	0.709	0.800	3.565	0.227	0.207	156	722	17	79	0.170	9	8	29	50	-50
1	16	10	"YMRWdelta20"	"YMRWdelta20"	5070	15760	120	186	178	66	82	85	28	80	69	0	1160	997	595	66	68	89	87	81	0	0.095	0.103	0.116	0.123	2.468	0.093	0.681	120	575	1198	1027	-3.395	104	1094	96	931	0
1	17	10	"IntYNL112W"	"IntYNL112W"	5260	15750	120	467	473	251	83	85	23	90	87	0	1030	917	610	67	70	88	83	79	0	0.399	0.459	0.487	0.533	2.083	0.376	0.782	120	588	1347	1240	-1.326	384	963	390	850	0
1	18	10	"CEN14"	"CEN14"	5480	15750	120	532	488	231	83	89	30	93	90	0	226	207	106	68	75	152	51	2	0	2.842	2.914	2.908	2.733	1.877	1.475	0.163	120	545	607	544	1.507	449	158	405	139	0
1	19	10	"YORCdelta11"	"YORCdelta11"	5650	15750	120	1175	1051	514	89	130	163	88	82	0	1444	1224	665	70	148	320	80	72	0	0.790	0.834	0.820	0.858	1.875	0.800	0.905	120	543	2460	2116	-0.339	1086	1374	962	1154	0
1	20	10	"YORWdelta16"	"YORWdelta16"	5860	15740	120	455	477	258	83	85	24	94	93	0	422	393	233	66	66	30	86	83	0	1.045	1.205	1.171	1.267	2.293	1.176	0.856	120	553	728	721	0.063	372	356	394	327	0
1	21	10	"YOR298C-A"	"YOR298C-A"	6050	15740	120	240	271	151	86	105	305	24	0	0	586	790	643	66	87	455	55	38	0	0.296	0.256	0.275	0.311	2.009	0.472	0.691	120	572	674	909	-1.756	154	520	185	724	0
1	1	11	"YPLCdelta10"	"YPLCdelta10"	2080	16020	120	941	1077	730	80	84	22	99	97	0	1326	1562	1184	68	79	301	84	60	0	0.684	0.667	0.664	0.753	1.928	0.629	0.890	120	565	2119	2491	-0.547	861	1258	997	1494	0
1	2	11	"YPRCdelta13"	"YPRCdelta13"	2270	16010	130	1790	1806	1033	82	86	24	99	98	0	1443	1471	903	69	66	21	95	94	0	1.243	1.230	1.231	1.371	1.971	1.210	0.921	120	582	3082	3126	0.314	1708	1374	1724	1402	0
1	3	11	"SNR51"	"SNR51"	2480	16010	120	283	282	124	83	86	22	92	86	0	733	715	459	68	66	20	93	90	0	0.301	0.308	0.297	0.302	2.047	0.247	0.672	120	557	865	846	-1.733	200	665	199	647	0
1	4	11	"iYAL068C-0"	"iYAL068C-0"	2650	16000	110	664	755	474	85	89	32	91	88	0	1208	1402	1036	70	72	38	92	90	0	0.509	0.503	0.484	0.503	2.109	0.465	0.892	80	480	1717	2002	-0.975	579	1138	670	1332	0
1	5	11	"iYAL067C"	"iYAL067C"	2860	15990	130	2012	1926	1325	85	90	38	96	91	0	3726	3589	2675	69	76	80	91	88	0	0.527	0.523	0.528	0.609	2.285	0.502	0.918	120	647	5584	5361	-0.924	1927	3657	1841	3520	0
1	6	11	"iYAL064C-A-0"	"iYAL064C-A-0"	3070	16010	120	3466	3050	1601	84	87	34	100	98	0	5396	4749	2785	69	71	56	97	95	0	0.635	0.634	0.631	0.722	1.964	0.602	0.908	120	563	8709	7646	-0.655	3382	5327	2966	4680	0
1	7	11	"iYBR065C"	"iYBR065C"	3260	15990	140	998	1095	738	81	83	23	96	94	0	1767	1939	1515	69	68	41	89	85	0	0.540	0.542	0.578	0.655	1.994	0.506	0.922	156	737	2615	2884	-0.889	917	1698	1014	1870	0
1	8	11	"iYBR069C"	"iYBR069C"	3470	15990	120	979	975	505	84	85	23	97	95	0	2297	2191	1214	68	70	48	96	95	0	0.402	0.420	0.425	0.428	1.896	0.400	0.883	120	566	3124	3014	-1.316	895	2229	891	2123	0
1	9	11	"iYBR073W"	"iYBR073W"	3660	15990	120	841	802	436	85	85	22	94	92	0	1621	1661	1077	68	67	31	94	93	0	0.487	0.450	0.455	0.502	1.816	0.413	0.879	120	532	2309	2310	-1.039	756	1553	717	1593	0
1	10	11	"iYBR085W-1"	"iYBR085W-1"	3860	15980	130	1614	1622	1050	84	86	25	96	93	0	1870	1890	1371	69	68	29	90	90	0	0.850	0.845	0.850	0.934	1.864	0.798	0.880	120	679	3331	3359	-0.235	1530	1801	1538	1821	0
1	11	11	"iYBR089W"	"iYBR089W"	4070	15980	120	2324	2103	1193	85	87	25	98	96	0	4396	4229	2580	70	69	34	95	94	0	0.518	0.485	0.500	0.520	1.622	0.473	0.917	120	601	6565	6177	-0.950	2239	4326	2018	4159	0
1	12	11	"iYBR093C"	"iYBR093C"	4250	15980	130	1067	1011	556	84	85	23	96	94	0	1548	1484	972	68	67	28	93	91	0	0.664	0.655	0.660	0.762	1.904	0.610	0.930	120	644	2463	2343	-0.590	983	1480	927	1416	0
1	13	11	"iYBR111C"	"iYBR111C"	4470	15960	130	1943	1761	1135	83	94	81	90	85	0	3780	3878	2761	69	88	165	89	85	0	0.501	0.441	0.443	0.510	1.817	0.409	0.922	120	631	5571	5487	-0.997	1860	3711	1678	3809	0
1	14	11	"iYBR117C"	"iYBR117C"	4670	15970	120	2338	2004	947	83	96	88	97	95	0	4705	3926	1943	69	94	181	94	93	0	0.486	0.498	0.518	0.534	1.516	0.488	0.946	120	533	6891	5778	-1.040	2255	4636	1921	3857	0
1	15	11	"iYBR121C"	"iYBR121C"	4850	15970	120	2112	1939	944	86	87	24	100	99	0	3186	2818	1689	68	81	224	92	86	0	0.650	0.674	0.672	0.800	1.717	0.626	0.930	120	562	5144	4603	-0.622	2026	3118	1853	2750	0
1	16	11	"iYBR139W"	"iYBR139W"	5070	15950	130	367	366	186	83	85	21	92	89	0	678	649	409	66	66	29	88	87	0	0.464	0.485	0.474	0.524	1.981	0.459	0.892	120	660	896	866	-1.108	284	612	283	583	0
1	17	11	"iYBR143C"	"iYBR143C"	5280	15960	120	1049	926	484	83	85	23	100	97	0	1755	1607	981	67	69	75	94	91	0	0.572	0.547	0.552	0.617	1.818	0.506	0.905	120	562	2654	2383	-0.805	966	1688	843	1540	0
1	18	11	"iYBR147W"	"iYBR147W"	5470	15950	120	611	646	388	83	85	22	97	92	0	1425	1515	997	66	68	74	89	86	0	0.389	0.389	0.407	0.427	2.169	0.371	0.910	120	544	1887	2012	-1.364	528	1359	563	1449	0
1	19	11	"iYDL240W"	"iYDL240W"	5670	15950	130	248	259	115	84	87	24	91	85	0	932	905	533	67	67	31	95	92	0	0.190	0.209	0.213	0.227	2.142	0.198	0.833	120	674	1029	1013	-2.399	164	865	175	838	0
1	20	11	"iYDL236W"	"iYDL236W"	5890	15930	100	152	157	64	84	87	28	72	57	0	310	301	178	66	67	33	78	75	0	0.279	0.311	0.347	0.382	2.658	0.301	0.644	80	481	312	308	-1.843	68	244	73	235	0
1	21	11	"iYDL232W"	"iYDL232W"	6080	15920	130	391	397	207	86	103	287	51	14	0	1086	1162	745	67	87	428	75	55	0	0.299	0.284	0.281	0.305	1.682	0.271	0.909	120	646	1324	1406	-1.740	305	1019	311	1095	0
1	1	12	"iYDL216C"	"iYDL216C"	2080	16210	140	300	357	231	79	81	22	89	83	0	614	875	693	67	67	53	87	82	0	0.404	0.344	0.355	0.372	2.180	0.313	0.834	156	798	768	1086	-1.307	221	547	278	808	0
1	2	12	"iYDL212W"	"iYDL212W"	2290	16200	130	195	209	99	81	85	24	87	74	0	918	1167	851	67	67	29	95	95	0	0.134	0.116	0.117	0.140	2.451	0.099	0.687	120	636	965	1228	-2.900	114	851	128	1100	0
1	3	12	"itG(GCC)D1"	"itG(GCC)D1"	2490	16200	110	1367	1277	745	81	87	40	97	92	0	2919	2690	1825	65	75	90	88	86	0	0.451	0.456	0.454	0.556	2.202	0.408	0.912	80	522	4140	3821	-1.150	1286	2854	1196	2625	0
1	4	12	"iYDL195W"	"iYDL195W"	2700	16200	150	354	513	428	83	89	40	76	69	0	860	1527	1536	69	77	79	76	70	0	0.343	0.295	0.305	0.361	2.902	0.269	0.871	156	788	1062	1888	-1.545	271	791	430	1458	0
1	5	12	"iYDL191W"	"iYDL191W"	2880	16190	110	511	488	292	85	91	40	88	80	0	1849	1854	1302	70	81	75	86	85	0	0.239	0.226	0.229	0.266	2.129	0.215	0.870	80	467	2205	2187	-2.062	426	1779	403	1784	0
1	6	12	"iYDL186W"	"iYDL186W"	3070	16190	130	1339	1362	990	82	86	26	95	95	0	1277	1521	1181	70	75	58	90	86	0	1.041	0.882	0.883	0.990	1.840	0.854	0.927	120	589	2464	2731	0.059	1257	1207	1280	1451	0
1	7	12	"iYDL170W"	"iYDL170W"	3260	16200	120	825	839	488	83	84	23	98	98	0	912	962	590	69	68	26	95	94	0	0.880	0.847	0.837	0.894	1.788	0.829	0.924	120	566	1585	1649	-0.184	742	843	756	893	0
1	8	12	"iYDL166C"	"iYDL166C"	3470	16190	110	229	240	123	84	86	24	87	78	0	502	545	342	69	71	50	92	87	0	0.335	0.328	0.323	0.311	1.955	0.330	0.794	80	515	578	632	-1.578	145	433	156	476	0
1	9	12	"iYDL160C"	"iYDL160C"	3660	16180	120	380	374	164	86	89	30	95	91	0	1726	1861	1146	70	72	37	95	95	0	0.178	0.161	0.163	0.182	2.150	0.142	0.818	120	533	1950	2079	-2.494	294	1656	288	1791	0
1	10	12	"iYDR141C"	"iYDR141C"	3840	16180	120	702	650	342	84	89	31	93	90	0	2575	2228	1417	71	76	83	90	87	0	0.247	0.262	0.267	0.316	2.329	0.241	0.886	120	549	3122	2723	-2.019	618	2504	566	2157	0
1	11	12	"iYDR145W"	"iYDR145W"	4050	16170	110	149	152	48	84	85	24	80	65	0	376	348	150	69	70	79	85	78	0	0.212	0.244	0.241	0.243	2.689	0.160	0.345	80	542	372	347	-2.240	65	307	68	279	0
1	12	12	"iYDR150W"	"iYDR150W"	4260	16170	130	1699	1785	1111	84	86	25	95	94	0	2339	2297	1531	69	72	121	85	83	0	0.711	0.763	0.753	0.830	1.807	0.739	0.940	120	633	3885	3929	-0.491	1615	2270	1701	2228	0
1	13	12	"iYDR169C-0"	"iYDR169C-0"	4460	16170	120	303	312	141	85	96	85	80	64	0	2350	2177	1225	70	85	162	93	88	0	0.096	0.108	0.105	0.108	1.844	0.102	0.837	120	557	2498	2334	-3.387	218	2280	227	2107	0
1	14	12	"iYDR170W-A-0"	"iYDR170W-A-0"	4650	16170	130	14908	16035	10978	84	89	46	100	100	0	15490	16308	11730	69	74	85	99	97	0	0.961	0.982	0.966	1.139	1.799	0.961	0.962	120	586	30245	32190	-0.057	14824	15421	15951	16239	0
1	15	12	"iYDR173C"	"iYDR173C"	4850	16160	110	897	936	551	87	90	27	97	93	0	2146	2065	1353	69	86	241	85	80	0	0.390	0.425	0.432	0.492	1.799	0.400	0.935	80	498	2887	2845	-1.359	810	2077	849	1996	0
1	16	12	"iYDR189W"	"iYDR189W"	5050	16160	120	541	527	271	85	87	25	92	90	0	1541	1462	837	67	79	222	87	78	0	0.309	0.317	0.327	0.333	1.924	0.310	0.930	120	579	1930	1837	-1.693	456	1474	442	1395	0
1	17	12	"iYDR194C"	"iYDR194C"	5250	16150	120	700	723	478	83	85	22	93	90	0	1759	1735	1213	67	63	19	95	93	0	0.365	0.384	0.382	0.404	1.869	0.376	0.920	120	562	2309	2308	-1.455	617	1692	640	1668	0
1	18	12	"iYDR198C"	"iYDR198C"	5460	16150	120	806	761	459	85	87	26	93	88	0	1124	1120	779	67	68	73	85	79	0	0.682	0.642	0.662	0.766	2.276	0.609	0.925	120	580	1778	1729	-0.552	721	1057	676	1053	0
1	19	12	"iYDR214W"	"iYDR214W"	5640	16140	110	158	169	76	85	89	31	71	56	0	278	248	159	69	69	33	72	68	0	0.349	0.469	0.450	0.438	2.561	0.436	0.677	80	506	282	263	-1.518	73	209	84	179	0
1	20	12	"iYDR218C"	"iYDR218C"	5860	16140	110	801	747	315	84	88	29	98	92	0	2583	2198	1095	68	69	33	98	96	0	0.285	0.311	0.304	0.337	1.862	0.293	0.914	80	554	3232	2793	-1.811	717	2515	663	2130	0
1	21	12	"iYDR223W"	"iYDR223W"	6050	16130	130	960	935	559	83	86	26	98	95	0	1519	1491	994	66	67	28	96	95	0	0.604	0.598	0.640	0.616	1.976	0.544	0.775	120	737	2330	2277	-0.728	877	1453	852	1425	0
1	1	13	"iYDR532C"	"iYDR532C"	2090	16420	120	236	265	127	83	84	24	93	85	0	423	479	312	67	66	31	90	88	0	0.430	0.442	0.445	0.496	2.209	0.405	0.834	120	592	509	594	-1.218	153	356	182	412	0
1	2	13	"iYDR535C"	"iYDR535C"	2270	16410	120	475	470	292	81	84	25	90	85	0	2470	2652	1997	66	67	31	97	95	0	0.164	0.150	0.158	0.164	1.799	0.141	0.898	120	586	2798	2975	-2.609	394	2404	389	2586	0
1	3	13	"iYDR539W-1"	"iYDR539W-1"	2480	16400	80	177	186	95	80	83	23	78	73	0	302	339	241	66	65	28	80	76	0	0.411	0.388	0.360	0.431	2.726	0.327	0.637	52	326	333	379	-1.283	97	236	106	273	0
1	4	13	"iYEL073C-4"	"iYEL073C-4"	2650	16400	110	308	308	141	81	83	24	91	86	0	1238	1194	738	68	67	60	90	87	0	0.194	0.202	0.208	0.220	1.913	0.185	0.850	80	512	1397	1353	-2.366	227	1170	227	1126	0
1	5	13	"iYEL071W-1"	"iYEL071W-1"	2860	16400	120	1575	1647	1030	81	84	27	97	96	0	2444	2208	1415	70	74	71	91	90	0	0.629	0.732	0.736	0.762	1.595	0.721	0.923	120	629	3868	3704	-0.668	1494	2374	1566	2138	0
1	6	13	"iYEL068C"	"iYEL068C"	3060	16400	130	733	853	615	79	83	24	94	92	0	1617	1926	1549	69	68	40	87	85	0	0.422	0.417	0.421	0.464	2.044	0.396	0.930	120	636	2202	2631	-1.243	654	1548	774	1857	0
1	7	13	"iYEL051W"	"iYEL051W"	3260	16380	110	429	427	252	83	88	35	86	81	0	1742	1598	1161	69	86	140	82	75	0	0.207	0.225	0.241	0.281	1.984	0.219	0.910	80	501	2019	1873	-2.274	346	1673	344	1529	0
1	8	13	"itG(GCC)E"	"itG(GCC)E"	3450	16380	110	251	248	122	83	87	34	82	73	0	597	640	438	69	84	134	75	66	0	0.318	0.289	0.275	0.322	2.202	0.255	0.785	80	558	696	736	-1.652	168	528	165	571	0
1	9	13	"iYEL047C"	"iYEL047C"	3660	16390	120	3298	2974	1802	84	88	31	98	95	0	2685	2604	1717	71	72	33	94	94	0	1.230	1.141	1.147	1.277	1.607	1.106	0.959	120	604	5828	5423	0.298	3214	2614	2890	2533	0
1	10	13	"iYEL029C"	"iYEL029C"	3870	16370	130	495	615	434	86	89	29	85	81	0	3227	3505	2859	70	78	89	86	84	0	0.130	0.154	0.152	0.161	1.666	0.149	0.937	120	682	3566	3964	-2.948	409	3157	529	3435	0
1	11	13	"iYEL027W"	"iYEL027W"	4100	16380	120	2413	2488	1680	83	85	23	98	97	0	1911	2005	1395	68	69	54	91	87	0	1.264	1.242	1.254	1.433	1.764	1.226	0.962	120	622	4173	4342	0.338	2330	1843	2405	1937	0
1	12	13	"iYEL023C"	"iYEL023C"	4290	16370	120	570	569	348	83	86	29	90	84	0	3017	2825	1976	68	75	137	84	80	0	0.165	0.176	0.175	0.207	2.320	0.168	0.904	120	501	3436	3243	-2.598	487	2949	486	2757	0
1	13	13	"iYFL031W"	"iYFL031W"	4460	16370	130	743	723	398	85	88	30	99	95	0	1986	1712	1026	69	69	29	95	93	0	0.343	0.388	0.386	0.438	1.931	0.377	0.934	120	566	2575	2281	-1.543	658	1917	638	1643	0
1	14	13	"iYFL027C"	"iYFL027C"	4670	16360	140	1030	948	570	83	85	24	97	96	0	2318	2103	1362	68	69	81	95	94	0	0.421	0.425	0.424	0.443	1.584	0.415	0.955	156	656	3197	2900	-1.248	947	2250	865	2035	0
1	15	13	"iYFL023W"	"iYFL023W"	4860	16360	120	588	602	375	81	84	26	90	85	0	794	811	542	67	71	97	82	75	0	0.697	0.700	0.689	0.691	2.043	0.666	0.865	120	549	1234	1265	-0.520	507	727	521	744	0
1	16	13	"iYFL009W"	"iYFL009W"	5060	16350	120	198	202	89	82	84	23	86	75	0	277	275	154	66	64	28	85	79	0	0.550	0.574	0.603	0.575	1.966	0.518	0.694	120	567	327	329	-0.863	116	211	120	209	0
1	17	13	"iYFL005W"	"iYFL005W"	5270	16350	130	4368	3983	2268	83	85	24	99	98	0	2270	2021	1206	67	65	27	94	92	0	1.945	1.996	1.985	2.185	1.515	1.988	0.958	120	639	6488	5854	0.960	4285	2203	3900	1954	0
1	18	13	"iYFLWdelta5"	"iYFLWdelta5"	5480	16360	120	1434	1311	736	91	102	53	97	95	0	775	702	413	71	88	78	84	76	0	1.908	1.933	1.974	2.157	1.729	1.921	0.921	120	544	2047	1851	0.932	1343	704	1220	631	0
1	19	13	"iYFR009W"	"iYFR009W"	5670	16350	140	1879	1934	1265	94	115	79	96	92	0	939	1022	676	74	106	110	85	78	0	2.064	1.941	1.925	1.979	1.750	1.964	0.926	156	672	2650	2788	1.045	1785	865	1840	948	0
1	20	13	"iYFR012W"	"iYFR012W"	5860	16340	130	5674	5083	2983	88	102	71	100	98	0	3696	3381	2074	70	89	94	95	91	0	1.541	1.509	1.535	1.689	1.527	1.501	0.954	120	614	9212	8306	0.623	5586	3626	4995	3311	0
1	21	13	"iYFR016C"	"iYFR016C"	6070	16340	120	930	867	454	84	86	25	100	96	0	1302	1113	636	69	68	32	94	90	0	0.686	0.750	0.777	0.891	1.927	0.732	0.940	120	628	2079	1827	-0.543	846	1233	783	1044	0
1	1	14	"iYFR027W"	"iYFR027W"	2090	16620	130	841	1084	942	83	85	24	92	90	0	1110	1373	1222	68	68	30	82	81	0	0.727	0.767	0.742	0.834	1.899	0.758	0.894	120	663	1800	2306	-0.459	758	1042	1001	1305	0
1	2	14	"iYFR030W"	"iYFR030W"	2280	16610	120	355	350	167	83	85	24	90	85	0	315	286	137	66	65	27	88	81	0	1.092	1.214	1.228	1.151	1.716	1.233	0.819	120	548	521	487	0.127	272	249	267	220	0
1	3	14	"iYFR032C-A"	"iYFR032C-A"	2480	16600	130	1752	1763	1125	83	87	29	96	92	0	2355	2253	1500	68	70	50	90	87	0	0.730	0.769	0.766	0.815	1.949	0.746	0.923	120	665	3956	3865	-0.454	1669	2287	1680	2185	0
1	4	14	"iYGL002W"	"iYGL002W"	2680	16600	130	3883	3677	2585	82	87	31	99	96	0	2037	2168	1604	69	72	71	88	84	0	1.931	1.713	1.762	1.973	1.887	1.701	0.932	120	621	5769	5694	0.950	3801	1968	3595	2099	0
1	5	14	"iYGR002C"	"iYGR002C"	2880	16610	120	4321	4179	2138	81	85	26	100	100	0	1892	1752	968	71	69	33	96	95	0	2.328	2.438	2.435	2.700	1.693	2.429	0.926	120	571	6061	5779	1.219	4240	1821	4098	1681	0
1	6	14	"iYGR006W"	"iYGR006W"	3090	16600	140	3866	5204	4183	81	85	26	100	99	0	1745	2382	1968	71	70	48	96	96	0	2.261	2.217	2.157	2.320	1.691	2.228	0.921	156	663	5459	7434	1.177	3785	1674	5123	2311	0
1	7	14	"iYGR026W"	"iYGR026W"	3270	16590	130	2324	2190	1368	83	87	33	97	94	0	1767	1680	1087	69	89	194	81	79	0	1.320	1.308	1.301	1.439	1.918	1.289	0.883	120	644	3939	3718	0.400	2241	1698	2107	1611	0
1	8	14	"iYGR028W"	"iYGR028W"	3490	16590	110	1449	1257	618	84	87	26	100	100	0	2331	2106	1112	69	72	43	100	100	0	0.603	0.576	0.564	0.597	1.485	0.550	0.927	80	533	3627	3210	-0.729	1365	2262	1173	2037	0
1	9	14	"iYGR030C"	"iYGR030C"	3670	16580	130	745	686	345	82	86	32	98	95	0	1655	1721	1011	69	71	55	99	96	0	0.418	0.366	0.361	0.383	1.550	0.341	0.905	120	649	2249	2256	-1.258	663	1586	604	1652	0
1	10	14	"iYGR043C-0"	"iYGR043C-0"	3910	16580	120	245	248	125	81	84	24	85	75	0	774	820	550	67	73	78	85	82	0	0.232	0.222	0.239	0.253	2.737	0.196	0.732	120	598	871	920	-2.108	164	707	167	753	0
1	11	14	"iYGR047C"	"iYGR047C"	4090	16580	130	906	805	392	81	84	23	95	93	0	2974	2449	1305	66	67	51	95	93	0	0.284	0.304	0.293	0.322	1.743	0.290	0.904	120	566	3733	3107	-1.818	825	2908	724	2383	0
1	12	14	"iYGR051C"	"iYGR051C"	4280	16570	120	930	856	427	83	86	26	99	98	0	2357	2053	1095	67	65	19	99	99	0	0.370	0.389	0.372	0.383	1.550	0.373	0.914	120	558	3137	2759	-1.435	847	2290	773	1986	0
1	13	14	"iYGR067C"	"iYGR067C"	4490	16570	120	345	348	203	84	86	27	86	78	0	787	820	574	68	65	19	85	80	0	0.363	0.351	0.366	0.397	2.476	0.528	0.584	120	575	980	1016	-1.462	261	719	264	752	0
1	14	14	"iYGR072W"	"iYGR072W"	4680	16560	120	146	151	66	82	84	22	69	59	0	214	218	136	66	66	55	69	58	0	0.432	0.454	0.417	0.472	2.140	0.314	0.425	120	540	212	221	-1.209	64	148	69	152	0
1	15	14	"iYGR078C"	"iYGR078C"	4890	16560	130	425	498	321	80	83	24	91	85	0	685	814	627	67	67	52	85	79	0	0.558	0.560	0.566	0.647	2.220	0.525	0.889	120	662	963	1165	-0.841	345	618	418	747	0
1	16	14	"iYHR009C"	"iYHR009C"	5110	16550	130	715	645	363	82	84	23	94	93	0	2057	1939	1236	66	65	22	92	91	0	0.318	0.301	0.306	0.337	1.936	0.283	0.876	120	612	2624	2436	-1.653	633	1991	563	1873	0
1	17	14	"iYHR013C"	"iYHR013C"	5280	16550	130	2759	2444	1495	82	85	25	97	94	0	2146	1804	1137	67	65	19	92	90	0	1.288	1.360	1.350	1.450	1.865	1.356	0.928	120	611	4756	4099	0.365	2677	2079	2362	1737	0
1	18	14	"iYHRWdelta7"	"iYHRWdelta7"	5510	16550	130	543	499	273	87	99	51	83	77	0	860	753	428	70	84	73	86	80	0	0.577	0.603	0.595	0.587	2.075	0.597	0.848	120	603	1246	1095	-0.793	456	790	412	683	0
1	19	14	"iYHR027C"	"iYHR027C"	5700	16550	130	862	855	495	90	112	81	90	83	0	1107	968	577	75	105	113	89	80	0	0.748	0.857	0.848	0.860	2.012	0.850	0.906	120	546	1804	1658	-0.419	772	1032	765	893	0
1	20	14	"iYHR031C"	"iYHR031C"	5890	16540	120	650	635	342	88	98	63	90	81	0	1239	1101	597	71	85	87	90	87	0	0.481	0.531	0.531	0.543	2.313	0.529	0.869	120	516	1730	1577	-1.055	562	1168	547	1030	0
1	21	14	"iYHR035W"	"iYHR035W"	6070	16530	130	599	608	298	84	87	24	97	95	0	1731	1544	902	70	71	46	95	93	0	0.310	0.355	0.363	0.409	1.941	0.333	0.905	120	664	2176	1998	-1.689	515	1661	524	1474	0
1	1	15	"iYHR048W"	"iYHR048W"	2090	16810	130	356	346	183	80	82	25	89	85	0	1073	1076	744	68	68	39	91	88	0	0.275	0.264	0.273	0.292	2.132	0.237	0.837	120	724	1281	1274	-1.864	276	1005	266	1008	0
1	2	15	"iYHR052W"	"iYHR052W"	2310	16810	130	1107	1000	572	82	84	25	96	94	0	1717	1501	963	68	69	42	90	89	0	0.622	0.641	0.625	0.675	1.963	0.603	0.894	120	597	2674	2351	-0.686	1025	1649	918	1433	0
1	3	15	"iYHR056C"	"iYHR056C"	2480	16810	130	691	709	368	83	86	30	96	92	0	3702	3350	2040	68	70	46	96	95	0	0.167	0.191	0.198	0.205	1.680	0.177	0.888	120	593	4242	3908	-2.579	608	3634	626	3282	0
1	4	15	"itF(GAA)H1"	"itF(GAA)H1"	2700	16800	140	1966	2132	1487	81	84	26	96	93	0	4242	4378	3228	69	68	40	95	92	0	0.452	0.476	0.480	0.511	2.395	0.458	0.883	156	710	6058	6360	-1.147	1885	4173	2051	4309	0
1	5	15	"iYHR075C"	"iYHR075C"	2900	16810	130	2952	2657	1146	82	85	25	100	100	0	6178	6040	2946	71	69	32	100	100	0	0.470	0.431	0.425	0.469	1.617	0.406	0.914	120	577	8977	8544	-1.089	2870	6107	2575	5969	0
1	6	15	"iYHR079C"	"iYHR079C"	3100	16800	130	2584	2381	1302	83	85	24	98	98	0	3820	3676	2129	71	70	34	96	95	0	0.667	0.637	0.645	0.707	1.882	0.621	0.899	120	558	6250	5903	-0.584	2501	3749	2298	3605	0
1	7	15	"iYIL013C"	"iYIL013C"	3290	16790	130	509	506	277	82	84	22	94	88	0	2923	2782	1820	68	78	169	89	82	0	0.150	0.156	0.159	0.187	2.243	0.142	0.833	120	581	3282	3138	-2.741	427	2855	424	2714	0
1	8	15	"iYIL009C-A"	"iYIL009C-A"	3490	16790	120	1520	1416	795	84	87	33	97	96	0	1500	1357	823	68	72	62	90	87	0	1.003	1.033	1.029	1.148	1.962	1.008	0.876	120	561	2868	2621	0.004	1436	1432	1332	1289	0
1	9	15	"iYIL009W"	"iYIL009W"	3690	16780	130	10745	9407	5182	84	95	100	100	96	0	3408	3080	1844	69	71	37	95	95	0	3.193	3.096	3.092	3.463	1.791	3.108	0.907	120	607	14000	12334	1.675	10661	3339	9323	3011	0
1	10	15	"itE(UUC)I"	"itE(UUC)I"	3900	16780	130	353	344	189	83	95	100	74	57	0	837	861	552	67	70	45	89	82	0	0.351	0.329	0.335	0.331	2.498	0.315	0.817	120	576	1040	1055	-1.512	270	770	261	794	0
1	11	15	"iYIR010W"	"iYIR010W"	4090	16780	120	1229	1153	715	83	86	25	95	91	0	531	564	383	67	66	29	84	82	0	2.470	2.153	2.145	2.212	2.156	2.111	0.857	120	512	1610	1567	1.304	1146	464	1070	497	0
1	12	15	"iYIR014W"	"iYIR014W"	4290	16770	130	268	260	122	81	85	25	88	79	0	1076	995	633	67	68	48	90	85	0	0.185	0.193	0.199	0.224	1.993	0.172	0.766	120	579	1196	1107	-2.432	187	1009	179	928	0
1	13	15	"iYIR026C"	"iYIR026C"	4500	16780	130	937	845	475	82	84	23	96	90	0	1228	1170	928	68	67	50	88	83	0	0.737	0.692	0.711	0.776	2.490	0.547	0.619	120	512	2015	1865	-0.440	855	1160	763	1102	0
1	14	15	"iYIR030C"	"iYIR030C"	4690	16770	140	460	580	426	82	85	23	92	87	0	891	1236	1051	67	67	53	83	79	0	0.459	0.426	0.441	0.511	2.283	0.396	0.868	156	598	1202	1667	-1.124	378	824	498	1169	0
1	15	15	"iYIR034C"	"iYIR034C"	4900	16760	130	578	573	337	83	87	23	90	85	0	1676	1678	1193	69	69	22	90	88	0	0.308	0.305	0.309	0.367	2.449	0.279	0.849	120	559	2102	2099	-1.699	495	1607	490	1609	0
1	16	15	"iYJL223C-0"	"iYJL223C-0"	5100	16760	130	7155	6287	3176	83	85	23	100	100	0	15135	13068	6583	68	67	22	100	100	0	0.469	0.477	0.484	0.481	1.608	0.469	0.919	120	562	22139	19204	-1.091	7072	15067	6204	13000	0
1	17	15	"iYJL219W"	"iYJL219W"	5300	16750	130	2187	1808	1011	84	87	27	95	93	0	3723	2973	1883	68	69	33	93	92	0	0.575	0.593	0.583	0.679	2.023	0.552	0.901	120	546	5758	4629	-0.797	2103	3655	1724	2905	0
1	18	15	"iYJL215C"	"iYJL215C"	5490	16750	130	701	648	380	85	88	28	92	90	0	1149	1087	730	68	68	34	88	85	0	0.570	0.553	0.557	0.571	1.984	0.517	0.831	120	529	1697	1582	-0.811	616	1081	563	1019	0
1	19	15	"iYJR093C"	"iYJR093C"	5680	16750	140	650	897	715	83	85	24	94	92	0	1004	1656	1507	68	67	22	92	92	0	0.606	0.513	0.538	0.583	2.176	0.475	0.897	156	597	1503	2402	-0.723	567	936	814	1588	0
1	20	15	"iYJR095W"	"iYJR095W"	5890	16740	130	964	974	625	85	88	23	96	95	0	2384	2518	1696	69	72	73	91	90	0	0.380	0.363	0.368	0.385	1.772	0.353	0.903	120	560	3194	3338	-1.397	879	2315	889	2449	0
1	21	15	"iYJR099W"	"iYJR099W"	6090	16740	120	270	319	182	84	88	25	90	85	0	635	706	463	68	77	179	82	70	0	0.328	0.368	0.370	0.385	2.293	0.346	0.796	120	608	753	873	-1.608	186	567	235	638	0
1	1	16	"iYJR115W"	"iYJR115W"	2100	17020	130	717	654	349	81	83	24	94	92	0	3541	2990	1780	67	67	39	92	90	0	0.183	0.196	0.200	0.216	1.862	0.185	0.905	120	691	4110	3496	-2.449	636	3474	573	2923	0
1	2	16	"iYJR119C"	"iYJR119C"	2310	17010	120	503	520	308	81	83	24	92	87	0	1243	1271	887	70	71	48	90	85	0	0.360	0.366	0.373	0.387	2.111	0.341	0.869	120	538	1595	1640	-1.475	422	1173	439	1201	0
1	3	16	"iYJR123W"	"iYJR123W"	2490	17010	120	255	243	111	80	83	24	85	79	0	958	997	653	69	69	49	87	84	0	0.197	0.176	0.173	0.201	2.003	0.156	0.773	120	557	1064	1091	-2.345	175	889	163	928	0
1	4	16	"iYJR140C"	"iYJR140C"	2700	17010	130	453	429	203	79	81	22	95	93	0	1854	1671	1020	68	65	21	97	96	0	0.209	0.218	0.222	0.247	1.956	0.196	0.867	120	592	2160	1953	-2.256	374	1786	350	1603	0
1	5	16	"iYJR144W"	"iYJR144W"	2900	17000	130	533	504	282	80	82	24	93	87	0	1983	1757	1127	69	66	23	90	88	0	0.237	0.251	0.262	0.285	1.944	0.235	0.855	120	510	2367	2112	-2.079	453	1914	424	1688	0
1	6	16	"iYJR149W"	"iYJR149W"	3090	17000	140	1013	1220	853	81	84	25	96	94	0	1413	1702	1327	69	68	22	90	88	0	0.693	0.697	0.707	0.851	2.233	0.653	0.879	156	531	2276	2772	-0.528	932	1344	1139	1633	0
1	7	16	"iYJR159W"	"iYJR159W"	3290	16990	140	1157	1292	829	83	84	23	98	95	0	3151	3346	2335	69	67	22	96	96	0	0.348	0.369	0.369	0.390	1.927	0.348	0.894	156	561	4156	4486	-1.521	1074	3082	1209	3277	0
1	8	16	"iYKL225W"	"iYKL225W"	3490	16990	140	14153	12182	7363	86	88	25	100	99	0	18865	16385	10491	69	70	53	98	96	0	0.748	0.741	0.734	0.862	2.078	0.719	0.923	156	540	32863	28412	-0.418	14067	18796	12096	16316	0
1	9	16	"iYKL221W-0"	"iYKL221W-0"	3680	16990	140	887	849	469	86	99	109	88	82	0	3082	2820	1780	69	70	33	96	96	0	0.266	0.277	0.284	0.315	2.200	0.261	0.902	156	485	3814	3514	-1.911	801	3013	763	2751	0
1	10	16	"iYKR062W"	"iYKR062W"	3820	16980	130	248	248	119	82	96	114	59	27	0	699	775	562	69	71	36	86	83	0	0.263	0.235	0.247	0.301	2.910	0.186	0.709	120	434	796	872	-1.924	166	630	166	706	0
1	11	16	"iYKR066C"	"iYKR066C"	4000	16980	150	753	697	397	83	84	25	96	92	0	3165	3228	2234	69	69	34	94	94	0	0.216	0.194	0.195	0.224	2.069	0.178	0.872	156	620	3766	3773	-2.208	670	3096	614	3159	0
1	12	16	"iYKR070W"	"iYKR070W"	4210	16970	150	1463	1289	913	83	86	26	89	85	0	1992	1844	1442	69	69	27	89	84	0	0.718	0.679	0.715	0.761	2.136	0.638	0.853	156	657	3303	2981	-0.479	1380	1923	1206	1775	0
1	13	16	"iYKR084C"	"iYKR084C"	4410	16960	150	561	720	548	83	86	24	86	82	0	1631	2204	1912	68	69	47	85	84	0	0.306	0.298	0.310	0.344	2.580	0.275	0.867	156	625	2041	2773	-1.709	478	1563	637	2136	0
1	14	16	"iYKR088C"	"iYKR088C"	4610	16960	150	435	444	261	83	85	24	88	83	0	975	1143	837	69	66	20	89	87	0	0.389	0.336	0.351	0.374	2.144	0.303	0.836	156	580	1258	1435	-1.364	352	906	361	1074	0
1	15	16	"iYKR092C-0"	"iYKR092C-0"	4810	16960	150	398	405	225	86	87	23	88	84	0	2756	2820	1993	69	67	20	96	94	0	0.116	0.116	0.117	0.133	2.269	0.108	0.868	156	612	2999	3070	-3.106	312	2687	319	2751	0
1	16	16	"iYKR103W"	"iYKR103W"	5010	16950	150	1092	1203	954	85	87	25	91	83	0	1311	1398	1116	70	68	23	85	80	0	0.811	0.842	0.869	0.830	2.361	0.852	0.905	156	630	2248	2446	-0.301	1007	1241	1118	1328	0
1	17	16	"iYKR106W-1"	"iYKR106W-1"	5210	16950	150	3933	4188	2927	85	88	28	98	96	0	5390	5840	4328	69	67	23	97	94	0	0.723	0.711	0.720	0.796	1.916	0.683	0.905	156	627	9169	9874	-0.468	3848	5321	4103	5771	0
1	18	16	"iYLL066C-1"	"iYLL066C-1"	5410	16940	150	7119	7918	6416	86	90	28	93	89	0	14374	15179	12512	69	70	37	92	91	0	0.492	0.518	0.533	0.584	2.381	0.503	0.905	156	658	21338	22942	-1.024	7033	14305	7832	15110	0
1	19	16	"iYLL050C"	"iYLL050C"	5620	16950	130	1771	1620	946	85	88	33	96	95	0	2453	2194	1402	68	66	31	96	95	0	0.707	0.722	0.726	0.774	1.527	0.693	0.893	120	582	4071	3661	-0.500	1686	2385	1535	2126	0
1	20	16	"iYLL044W"	"iYLL044W"	5810	16940	150	489	476	254	85	87	23	93	87	0	3344	3348	2222	67	67	64	96	91	0	0.123	0.119	0.119	0.135	2.066	0.109	0.862	156	640	3681	3672	-3.020	404	3277	391	3281	0
1	21	16	"iYLL040C"	"iYLL040C"	6010	16930	150	1836	1591	1147	85	88	24	89	86	0	1878	1673	1209	66	68	63	85	83	0	0.966	0.937	0.931	0.924	1.790	0.941	0.896	156	768	3563	3113	-0.049	1751	1812	1506	1607	0
1	1	17	"iYLR267W"	"iYLR267W"	2020	17220	120	952	851	483	80	82	23	99	96	0	3078	2771	1726	68	70	95	95	92	0	0.290	0.285	0.287	0.310	2.032	0.270	0.897	120	461	3882	3474	-1.787	872	3010	771	2703	0
1	2	17	"itV(AAC)L"	"itV(AAC)L"	2220	17210	150	1101	1027	685	80	83	24	94	90	0	1176	1199	846	69	69	43	91	85	0	0.922	0.838	0.839	0.839	1.772	0.809	0.904	156	666	2128	2077	-0.117	1021	1107	947	1130	0
1	3	17	"iYLR275W"	"iYLR275W"	2420	17220	120	254	268	126	81	85	26	91	82	0	510	523	297	71	75	95	82	77	0	0.394	0.414	0.395	0.425	2.017	0.342	0.725	120	542	612	639	-1.343	173	439	187	452	0
1	4	17	"iYLR293C"	"iYLR293C"	2620	17210	120	297	301	134	81	84	25	93	90	0	1959	1716	918	69	68	38	99	99	0	0.114	0.134	0.131	0.141	1.730	0.127	0.828	120	547	2106	1867	-3.129	216	1890	220	1647	0
1	5	17	"iYLR298C"	"iYLR298C"	2820	17200	150	731	683	388	80	83	27	92	88	0	2717	2611	1682	68	66	22	96	95	0	0.246	0.237	0.242	0.266	2.069	0.225	0.920	156	617	3300	3146	-2.025	651	2649	603	2543	0
1	6	17	"iYLRCdelta18"	"iYLRCdelta18"	3020	17190	150	177	185	94	80	84	26	71	62	0	540	571	412	68	66	23	85	82	0	0.206	0.209	0.199	0.216	2.087	0.188	0.683	156	581	569	608	-2.283	97	472	105	503	0
1	7	17	"iYLR318W"	"iYLR318W"	3220	17190	150	254	286	272	81	84	24	90	78	0	1246	1318	918	68	67	42	91	88	0	0.147	0.164	0.148	0.177	2.400	0.189	0.621	156	598	1351	1455	-2.767	173	1178	205	1250	0
1	8	17	"iYLR323C"	"iYLR323C"	3430	17190	140	938	915	547	84	86	25	96	92	0	2455	2355	1582	69	71	63	91	89	0	0.358	0.364	0.371	0.416	1.984	0.349	0.945	156	595	3240	3117	-1.482	854	2386	831	2286	0
1	9	17	"iYLR327C"	"iYLR327C"	3630	17180	140	550	574	347	83	85	25	91	88	0	3109	3355	2575	69	69	54	91	88	0	0.154	0.149	0.157	0.190	2.323	0.135	0.892	156	510	3507	3777	-2.703	467	3040	491	3286	0
1	10	17	"iYLR338W"	"iYLR338W"	3820	17180	150	620	610	379	82	84	24	91	86	0	1719	1770	1341	68	68	24	86	85	0	0.326	0.310	0.314	0.365	2.172	0.285	0.915	156	582	2189	2230	-1.618	538	1651	528	1702	0
1	11	17	"iYLR343W"	"iYLR343W"	4030	17180	130	936	850	449	83	85	26	92	90	0	2902	2473	1516	70	73	49	90	88	0	0.301	0.319	0.318	0.347	1.778	0.299	0.919	120	595	3685	3170	-1.731	853	2832	767	2403	0
1	12	17	"iYLR345W"	"iYLR345W"	4230	17180	130	395	383	185	82	85	26	90	86	0	1964	1734	1018	70	73	47	90	90	0	0.165	0.181	0.185	0.193	1.826	0.171	0.877	120	601	2207	1965	-2.597	313	1894	301	1664	0
1	13	17	"iYMR044W"	"iYMR044W"	4430	17170	130	942	919	472	83	86	24	95	92	0	2556	2354	1374	70	70	29	93	90	0	0.346	0.366	0.373	0.404	1.940	0.348	0.917	120	590	3345	3120	-1.533	859	2486	836	2284	0
1	14	17	"iYMR048W"	"iYMR048W"	4630	17170	120	985	946	508	85	87	26	95	92	0	1733	1603	955	72	70	28	94	93	0	0.542	0.562	0.558	0.614	1.830	0.540	0.920	120	561	2561	2392	-0.884	900	1661	861	1531	0
1	15	17	"iYMRCdelta10"	"iYMRCdelta10"	4840	17160	130	823	756	419	84	86	24	98	94	0	1087	1039	577	68	67	19	97	94	0	0.725	0.692	0.685	0.705	1.770	0.691	0.884	120	597	1758	1643	-0.464	739	1019	672	971	0
1	16	17	"iYMR067C"	"iYMR067C"	5030	17170	130	408	391	188	85	87	26	93	88	0	3171	2554	1427	69	67	22	95	94	0	0.104	0.123	0.121	0.133	2.240	0.117	0.850	120	569	3425	2791	-3.264	323	3102	306	2485	0
1	17	17	"iYMR071C"	"iYMR071C"	5230	17150	130	399	390	202	85	89	27	89	83	0	1722	1485	911	69	72	82	87	85	0	0.190	0.215	0.209	0.216	2.170	0.204	0.859	120	592	1967	1721	-2.396	314	1653	305	1416	0
1	18	17	"iYMR075C-A"	"iYMR075C-A"	5430	17150	130	543	583	325	87	90	32	93	91	0	1231	1185	733	68	71	81	89	85	0	0.392	0.444	0.441	0.466	1.849	0.279	0.547	120	640	1619	1613	-1.351	456	1163	496	1117	0
1	19	17	"iYMR090W"	"iYMR090W"	5640	17160	110	860	792	537	87	90	33	85	83	0	1016	979	745	64	62	24	82	82	0	0.812	0.770	0.752	0.830	1.750	0.717	0.904	80	540	1725	1620	-0.300	773	952	705	915	0
1	20	17	"iYMR095C"	"iYMR095C"	5850	17140	120	576	574	316	85	89	33	92	89	0	1372	1372	864	65	66	56	88	87	0	0.376	0.374	0.377	0.400	2.335	0.359	0.878	120	564	1798	1796	-1.412	491	1307	489	1307	0
1	21	17	"iYMRCdelta13"	"iYMRCdelta13"	6040	17140	120	345	379	219	85	90	32	90	84	0	656	681	460	69	70	54	84	80	0	0.443	0.480	0.475	0.466	1.993	0.446	0.836	120	598	847	906	-1.175	260	587	294	612	0
1	1	18	"iYMR111C"	"iYMR111C"	2060	17410	140	491	598	374	80	82	22	97	94	0	1678	1887	1342	68	69	80	94	91	0	0.255	0.285	0.296	0.310	1.847	0.272	0.921	156	684	2021	2337	-1.970	411	1610	518	1819	0
1	2	18	"iYMR115W"	"iYMR115W"	2240	17410	110	128	129	43	81	84	23	71	50	0	168	163	97	68	68	35	72	61	0	0.470	0.505	0.532	0.492	2.738	0.336	0.285	80	447	147	143	-1.089	47	100	48	95	0
1	3	18	"iYMRWdelta16"	"iYMRWdelta16"	2440	17410	130	885	953	637	84	86	27	93	92	0	958	1112	820	70	79	102	86	80	0	0.902	0.834	0.808	0.872	1.749	0.776	0.903	120	635	1689	1911	-0.149	801	888	869	1042	0
1	4	18	"iYNL258C"	"iYNL258C"	2680	17410	140	282	280	134	84	86	29	85	78	0	1963	1797	1182	69	72	51	89	87	0	0.105	0.113	0.111	0.137	2.490	0.103	0.792	156	601	2092	1924	-3.258	198	1894	196	1728	0
1	5	18	"iYNL254C"	"iYNL254C"	2850	17410	130	672	611	260	83	87	29	97	94	0	4518	4008	1997	70	67	28	99	98	0	0.132	0.134	0.135	0.139	1.512	0.126	0.907	120	483	5037	4466	-2.917	589	4448	528	3938	0
1	6	18	"iYNL249C"	"iYNL249C"	3040	17390	130	2029	1972	1232	82	89	39	95	93	0	1260	1232	812	68	71	80	88	81	0	1.633	1.624	1.630	1.743	1.971	1.624	0.889	120	591	3139	3054	0.708	1947	1192	1890	1164	0
1	7	18	"iYNL231C"	"iYNL231C"	3250	17390	130	352	353	200	82	88	39	82	73	0	1327	1090	734	69	80	166	76	70	0	0.215	0.265	0.261	0.286	2.153	0.177	0.575	120	612	1528	1292	-2.220	270	1258	271	1021	0
1	8	18	"iYNL225C"	"iYNL225C"	3450	17400	130	717	687	332	84	85	25	100	95	0	1202	1102	637	69	76	152	82	77	0	0.559	0.584	0.566	0.666	1.834	0.544	0.878	120	546	1766	1636	-0.840	633	1133	603	1033	0
1	9	18	"iYNL221C"	"iYNL221C"	3650	17390	140	1833	1726	1162	82	85	24	96	94	0	3675	3711	2724	68	67	23	93	92	0	0.485	0.451	0.452	0.525	2.020	0.428	0.925	156	614	5358	5287	-1.043	1751	3607	1644	3643	0
1	10	18	"iYNL202W"	"iYNL202W"	3860	17380	120	964	888	523	82	85	25	98	91	0	1058	960	574	68	67	22	94	92	0	0.891	0.904	0.921	0.934	1.981	0.892	0.869	120	561	1872	1698	-0.167	882	990	806	892	0
1	11	18	"iYNL197C"	"iYNL197C"	4060	17380	130	336	343	142	84	87	26	97	93	0	2038	1951	1212	69	71	47	97	95	0	0.128	0.138	0.136	0.155	1.828	0.119	0.850	120	629	2221	2141	-2.966	252	1969	259	1882	0
1	12	18	"iYNL193W"	"iYNL193W"	4270	17370	130	1115	1002	513	83	85	22	95	95	0	3550	3074	1688	70	69	25	98	97	0	0.297	0.306	0.301	0.326	1.691	0.296	0.930	120	557	4512	3923	-1.754	1032	3480	919	3004	0
1	13	18	"iYNL176C"	"iYNL176C"	4460	17370	140	364	419	271	85	90	34	83	78	0	2067	2645	2229	78	82	74	92	90	0	0.140	0.130	0.135	0.145	2.398	0.118	0.881	156	650	2268	2901	-2.834	279	1989	334	2567	0
1	14	18	"iYNL168C"	"iYNL168C"	4670	17360	120	719	636	343	87	96	79	87	80	0	2957	2555	1620	80	94	169	87	82	0	0.220	0.222	0.221	0.259	2.323	0.205	0.890	120	576	3509	3024	-2.187	632	2877	549	2475	0
1	15	18	"iYNL164C"	"iYNL164C"	4880	17360	130	1155	979	547	84	86	24	90	90	0	2327	1988	1245	72	74	39	89	86	0	0.475	0.467	0.467	0.520	1.704	0.445	0.916	120	576	3326	2811	-1.074	1071	2255	895	1916	0
1	16	18	"iYOL113W"	"iYOL113W"	5080	17360	140	725	738	487	85	87	24	93	90	0	978	1092	787	71	70	25	92	91	0	0.706	0.640	0.638	0.683	2.011	0.618	0.926	156	624	1547	1674	-0.503	640	907	653	1021	0
1	17	18	"iYOL109W"	"iYOL109W"	5280	17350	130	274	269	114	86	89	25	89	82	0	495	438	235	70	75	91	83	73	0	0.442	0.497	0.482	0.498	1.945	0.469	0.808	120	590	613	551	-1.177	188	425	183	368	0
1	18	18	"iYOLCdelta3"	"iYOLCdelta3"	5470	17350	120	730	711	377	85	87	24	99	97	0	551	599	336	68	67	45	93	90	0	1.335	1.179	1.170	1.269	1.757	1.159	0.857	120	564	1128	1157	0.417	645	483	626	531	0
1	19	18	"iYOL092W"	"iYOL092W"	5680	17350	120	584	549	262	86	87	24	92	90	0	852	734	371	68	65	25	92	92	0	0.635	0.695	0.659	0.657	1.574	0.508	0.595	120	539	1282	1129	-0.655	498	784	463	666	0
1	20	18	"iYOL088C"	"iYOL088C"	5860	17340	130	1513	1315	725	84	88	33	95	94	0	2094	1828	1062	69	71	62	90	89	0	0.706	0.700	0.713	0.790	1.951	0.683	0.927	120	584	3454	2990	-0.503	1429	2025	1231	1759	0
1	21	18	"iYOL084W"	"iYOL084W"	6060	17330	130	755	724	346	85	88	26	100	96	0	1756	1535	819	70	77	107	95	89	0	0.397	0.436	0.447	0.462	1.566	0.421	0.922	120	698	2356	2104	-1.331	670	1686	639	1465	0
1	1	19	"iYOL067C"	"iYOL067C"	2090	17620	140	280	294	149	80	83	23	89	83	0	1133	1231	865	69	67	23	89	89	0	0.188	0.184	0.192	0.220	2.653	0.166	0.839	156	698	1264	1376	-2.411	200	1064	214	1162	0
1	2	19	"iYOL063C"	"iYOL063C"	2280	17610	140	831	813	468	81	84	23	98	96	0	1560	1621	1032	69	70	45	93	92	0	0.503	0.472	0.459	0.483	1.634	0.451	0.924	156	625	2241	2284	-0.991	750	1491	732	1552	0
1	3	19	"iYOL059W"	"iYOL059W"	2480	17610	140	888	819	480	82	86	26	96	91	0	3819	3599	2352	71	76	77	96	93	0	0.215	0.209	0.210	0.215	1.752	0.200	0.933	156	598	4554	4265	-2.217	806	3748	737	3528	0
1	4	19	"iYOL045W"	"iYOL045W"	2670	17610	140	1238	1493	1075	84	86	26	97	96	0	1450	1626	1265	71	76	89	86	82	0	0.837	0.906	0.899	1.003	1.956	0.871	0.915	156	492	2533	2964	-0.257	1154	1379	1409	1555	0
1	5	19	"iYOL041C"	"iYOL041C"	2870	17610	160	1151	1250	765	82	87	27	98	97	0	1708	1713	1113	70	72	60	96	94	0	0.653	0.711	0.721	0.769	1.658	0.689	0.928	208	546	2707	2811	-0.616	1069	1638	1168	1643	0
1	6	19	"iYOL035C"	"iYOL035C"	3080	17600	140	262	279	144	82	89	39	86	73	0	1194	1370	985	69	72	79	87	83	0	0.160	0.151	0.156	0.169	2.112	0.134	0.799	156	614	1305	1498	-2.644	180	1125	197	1301	0
1	7	19	"iYOR260W"	"iYOR260W"	3290	17590	130	666	724	440	80	83	26	96	94	0	1565	1526	1005	69	76	152	90	84	0	0.392	0.442	0.456	0.473	1.750	0.420	0.910	120	550	2082	2101	-1.352	586	1496	644	1457	0
1	8	19	"iYOR265W"	"iYOR265W"	3470	17590	140	331	371	218	83	86	26	90	82	0	1416	1476	1139	70	71	42	88	87	0	0.184	0.205	0.208	0.248	2.633	0.185	0.871	156	587	1594	1694	-2.440	248	1346	288	1406	0
1	9	19	"iYOR269W"	"iYOR269W"	3680	17580	140	399	466	327	85	88	26	87	82	0	762	1010	808	70	79	181	75	66	0	0.454	0.405	0.385	0.414	2.116	0.364	0.834	156	595	1006	1321	-1.140	314	692	381	940	0
1	10	19	"iYOR287C"	"iYOR287C"	3870	17590	120	416	412	186	83	86	28	96	94	0	2730	2415	1411	69	81	195	90	85	0	0.125	0.140	0.140	0.159	1.942	0.130	0.878	120	524	2994	2675	-2.998	333	2661	329	2346	0
1	11	19	"iYOR290C"	"iYOR290C"	4070	17580	130	2398	2220	1233	84	87	27	99	97	0	3810	3303	1895	68	67	23	100	98	0	0.618	0.660	0.656	0.704	1.752	0.650	0.944	120	598	6056	5371	-0.693	2314	3742	2136	3235	0
1	12	19	"iYOR294W"	"iYOR294W"	4270	17570	140	542	575	365	84	86	23	94	91	0	1214	1543	1164	70	68	21	96	94	0	0.400	0.333	0.333	0.375	1.853	0.314	0.922	156	631	1602	1964	-1.321	458	1144	491	1473	0
1	13	19	"iYOR311C"	"iYOR311C"	4470	17570	130	219	231	111	86	90	34	82	67	0	1178	1222	884	75	80	78	88	83	0	0.121	0.126	0.142	0.155	2.312	0.116	0.774	120	561	1236	1292	-3.052	133	1103	145	1147	0
1	14	19	"iYOR315W"	"iYOR315W"	4670	17570	130	930	1037	674	88	95	77	92	85	0	1282	1488	1060	79	92	164	87	79	0	0.700	0.674	0.677	0.762	2.234	0.631	0.932	120	612	2045	2358	-0.515	842	1203	949	1409	0
1	15	19	"iYOR318C"	"iYOR318C"	4880	17560	140	874	809	487	85	91	73	91	84	0	2565	2380	1606	73	82	149	88	82	0	0.317	0.314	0.315	0.351	1.928	0.299	0.927	156	619	3281	3031	-1.659	789	2492	724	2307	0
1	16	19	"iYOR337W"	"iYOR337W"	5070	17550	130	364	379	219	86	87	24	90	81	0	1328	1204	867	72	71	25	86	83	0	0.221	0.259	0.269	0.289	1.765	0.246	0.896	120	524	1534	1425	-2.176	278	1256	293	1132	0
1	17	19	"iYOR341W"	"iYOR341W"	5280	17560	130	1399	1250	751	86	88	26	95	92	0	3174	2685	1788	69	75	67	91	89	0	0.423	0.445	0.431	0.467	1.807	0.425	0.942	120	613	4418	3780	-1.242	1313	3105	1164	2616	0
1	18	19	"iYORWdelta24"	"iYORWdelta24"	5480	17550	130	327	323	124	84	87	25	97	90	0	1133	988	465	68	72	66	95	92	0	0.228	0.260	0.262	0.279	1.879	0.240	0.803	120	616	1308	1159	-2.132	243	1065	239	920	0
1	19	19	"iYPL030W"	"iYPL030W"	5680	17540	130	2321	2070	1226	87	89	25	98	98	0	1983	1818	1095	69	76	137	92	83	0	1.167	1.134	1.136	1.136	1.571	1.122	0.923	120	582	4148	3732	0.223	2234	1914	1983	1749	0
1	20	19	"iYPL026C"	"iYPL026C"	5870	17540	130	619	573	313	87	91	27	94	88	0	1634	1428	937	70	78	138	85	80	0	0.340	0.358	0.366	0.405	1.738	0.329	0.877	120	598	2096	1844	-1.556	532	1564	486	1358	0
1	21	19	"iYPL022W"	"iYPL022W"	6080	17540	130	1140	1043	492	85	91	28	97	96	0	3456	2902	1549	70	76	98	95	95	0	0.312	0.338	0.345	0.363	1.426	0.322	0.946	120	727	4441	3790	-1.682	1055	3386	958	2832	0
1	1	20	"iYPL005W"	"iYPL005W"	2070	17820	140	6447	8022	5568	83	85	24	100	100	0	1499	1628	1140	69	67	25	94	92	0	4.450	5.092	5.218	5.555	1.711	5.197	0.923	156	840	7794	9498	2.154	6364	1430	7939	1559	0
1	2	20	"iYPL001W"	"iYPL001W"	2280	17810	130	1386	1454	963	81	85	25	97	94	0	458	412	258	69	70	42	81	77	0	3.355	4.003	3.923	3.855	2.015	4.123	0.849	120	687	1694	1716	1.746	1305	389	1373	343	0
1	3	20	"itF(GAA)P1"	"itF(GAA)P1"	2490	17810	130	1193	1141	685	83	87	29	96	93	0	735	711	452	69	70	47	86	82	0	1.667	1.648	1.694	1.811	1.891	1.667	0.874	120	652	1776	1700	0.737	1110	666	1058	642	0
1	4	20	"iYPR013C-1"	"iYPR013C-1"	2680	17800	140	288	331	179	84	87	30	93	83	0	1714	2276	1685	71	75	66	96	94	0	0.124	0.112	0.115	0.120	1.888	0.102	0.837	156	662	1847	2452	-3.010	204	1643	247	2205	0
1	5	20	"iYPR016C"	"iYPR016C"	2880	17800	140	253	257	135	83	87	27	84	76	0	366	460	336	71	73	56	78	71	0	0.576	0.447	0.431	0.476	2.212	0.399	0.770	156	664	465	563	-0.795	170	295	174	389	0
1	6	20	"iYPR020W"	"iYPR020W"	3080	17790	140	1951	1939	1152	80	83	24	98	97	0	919	893	539	70	68	26	92	92	0	2.204	2.259	2.137	2.311	1.774	2.272	0.909	156	690	2720	2682	1.140	1871	849	1859	823	0
1	7	20	"iYPR035W"	"iYPR035W"	3270	17790	130	431	450	253	81	84	26	91	85	0	1112	1051	735	69	68	22	91	90	0	0.336	0.376	0.377	0.454	2.115	0.342	0.868	120	686	1393	1351	-1.575	350	1043	369	982	0
1	8	20	"iYPR042C"	"iYPR042C"	3500	17790	140	349	393	238	83	86	25	89	82	0	1435	1778	1481	71	72	37	85	82	0	0.195	0.182	0.182	0.236	2.289	0.159	0.848	156	789	1630	2017	-2.358	266	1364	310	1707	0
1	9	20	"iYPR047W"	"iYPR047W"	3700	17790	140	333	457	337	84	87	25	89	83	0	1088	1784	1622	72	83	178	81	70	0	0.245	0.218	0.218	0.245	2.250	0.195	0.860	156	737	1265	2085	-2.029	249	1016	373	1712	0
1	10	20	"iYCL001W-A"	"iYCL001W-A"	3890	17780	130	11670	11141	7495	85	87	27	98	97	0	2858	2771	2040	70	76	94	86	84	0	4.155	4.093	3.973	4.583	2.351	4.100	0.900	120	644	14373	13757	2.055	11585	2788	11056	2701	0
1	11	20	"iYCL007C"	"iYCL007C"	4090	17780	130	586	666	424	85	87	27	95	91	0	556	712	512	68	67	23	93	92	0	1.027	0.902	0.878	0.964	1.895	0.856	0.878	120	660	989	1225	0.038	501	488	581	644	0
1	12	20	"iYCL012W"	"iYCL012W"	4280	17770	140	5625	6203	4541	86	87	25	100	99	0	1563	1803	1408	69	66	20	93	92	0	3.707	3.528	3.572	4.043	1.915	3.491	0.926	156	750	7033	7851	1.890	5539	1494	6117	1734	0
1	13	20	"iYCR011C"	"iYCR011C"	4480	17760	130	363	368	179	86	89	27	95	90	0	1050	978	597	71	73	55	90	86	0	0.283	0.311	0.307	0.336	2.082	0.291	0.838	120	661	1256	1189	-1.821	277	979	282	907	0
1	14	20	"iYCRCdelta6-A"	"iYCRCdelta6-A"	4680	17760	130	245	249	106	86	89	30	89	78	0	354	331	184	71	76	68	77	69	0	0.562	0.627	0.621	0.666	2.211	0.577	0.778	120	677	442	423	-0.832	159	283	163	260	0
1	15	20	"iYHR210C-A"	"iYHR210C-A"	4890	17760	140	2253	2167	1322	86	89	28	96	96	0	2849	3124	2112	71	72	56	96	92	0	0.780	0.682	0.677	0.744	1.720	0.650	0.937	156	756	4945	5134	-0.358	2167	2778	2081	3053	0
1	16	20	"iYHRCdelta14-C"	"iYHRCdelta14-C"	5070	17730	130	969	1036	606	86	88	24	96	95	0	2249	2260	1502	71	70	25	96	95	0	0.405	0.434	0.420	0.457	1.642	0.407	0.931	120	611	3061	3139	-1.303	883	2178	950	2189	0
1	17	20	"iYHRCdelta16-B"	"iYHRCdelta16-B"	5280	17740	130	319	307	139	88	89	25	92	84	0	503	467	277	70	72	49	82	77	0	0.533	0.552	0.540	0.578	1.946	0.506	0.820	120	694	664	616	-0.906	231	433	219	397	0
1	18	20	"iYLR157C-A"	"iYLR157C-A"	5490	17750	120	1116	1055	579	88	89	25	99	98	0	249	234	109	68	68	32	80	75	0	5.680	5.825	5.931	5.856	1.981	6.064	0.834	120	639	1209	1133	2.506	1028	181	967	166	0
1	19	20	"tE(UUC)C"	"tE(UUC)C"	5690	17740	120	194	199	79	89	91	26	86	72	0	238	235	118	70	73	109	73	28	0	0.625	0.667	0.621	0.592	2.302	0.625	0.668	120	610	273	275	-0.678	105	168	110	165	0
1	20	20	"tQ(UUG)L"	"tQ(UUG)L"	5880	17730	130	290	293	126	89	94	33	93	83	0	530	507	284	70	77	110	85	69	0	0.437	0.467	0.451	0.480	2.105	0.414	0.746	120	665	661	641	-1.194	201	460	204	437	0
1	21	20	"YHRCTy1-1B"	"YHRCTy1-1B"	6080	17740	130	36505	32429	17642	91	98	38	100	100	0	29638	25973	14784	72	77	69	100	100	0	1.232	1.249	1.222	1.275	1.380	1.224	0.965	120	777	65980	58239	0.301	36414	29566	32338	25901	0
2	1	1	"VPS8"	"YAL002W"	6550	13960	150	9522	12826	9753	88	103	97	100	98	0	2571	3383	2747	65	72	67	91	91	0	3.765	3.839	3.806	4.550	1.923	3.783	0.947	156	934	11940	16056	1.912	9434	2506	12738	3318	0
2	2	1	"MTW1"	"YAL034W-A"	6740	13970	130	6150	5226	3050	90	108	112	99	94	0	5223	4246	2709	65	76	80	84	83	0	1.175	1.228	1.253	1.773	2.401	1.206	0.963	120	691	11218	9317	0.233	6060	5158	5136	4181	0
2	3	1	"YAL065C-A"	"YAL065C-A"	6960	13970	120	703	827	578	89	90	25	94	92	0	1374	1479	1129	64	68	54	86	83	0	0.469	0.522	0.513	0.549	1.855	0.509	0.934	120	590	1924	2153	-1.093	614	1310	738	1415	0
2	4	1	"YAL004W"	"YAL004W"	7130	13960	130	1096	1315	982	88	91	34	95	90	0	2163	2846	2431	63	66	42	90	87	0	0.480	0.441	0.443	0.544	2.300	0.413	0.946	120	648	3108	4010	-1.059	1008	2100	1227	2783	0
2	5	1	"FUN12"	"YAL035W"	7330	13960	130	2515	2971	2466	88	99	71	97	90	0	2934	3864	3481	65	81	132	82	75	0	0.846	0.759	0.796	1.145	2.623	0.728	0.964	120	680	5296	6682	-0.241	2427	2869	2883	3799	0
2	6	1	"SEO1"	"YAL067C"	7530	13960	120	1262	1434	1091	88	100	76	90	82	0	2351	2956	2564	64	80	136	85	79	0	0.513	0.465	0.496	0.606	2.133	0.593	0.719	120	578	3461	4238	-0.962	1174	2287	1346	2892	0
2	7	1	"ERP2"	"YAL007C"	7720	13940	140	4242	4982	4265	89	92	27	94	94	0	1673	2159	1941	62	63	34	86	85	0	2.578	2.333	2.323	2.702	2.028	2.286	0.965	156	780	5764	6990	1.366	4153	1611	4893	2097	0
2	8	1	"YAL037W"	"YAL037W"	7930	13940	130	711	817	577	92	110	96	77	70	0	2394	2478	2021	64	119	344	75	64	0	0.266	0.300	0.305	0.371	2.487	0.283	0.940	120	715	2949	3139	-1.912	619	2330	725	2414	0
2	9	1	"YAL069W"	"YAL069W"	8150	13940	130	11127	9110	5535	94	116	108	98	97	0	21972	16829	10883	66	135	369	90	86	0	0.504	0.538	0.555	0.643	1.579	0.523	0.972	120	693	32939	25779	-0.990	11033	21906	9016	16763	0
2	10	1	"SPO7"	"YAL009W"	8330	13930	130	3151	3164	2317	92	120	130	91	83	0	2933	2956	2342	65	102	189	80	76	0	1.067	1.063	1.076	1.239	1.927	1.028	0.953	120	670	5927	5963	0.093	3059	2868	3072	2891	0
2	11	1	"CYC3"	"YAL039C"	8540	13920	130	673	713	428	91	112	121	83	75	0	3019	3012	2097	65	92	147	88	84	0	0.197	0.211	0.209	0.251	2.105	0.205	0.859	120	685	3536	3569	-2.344	582	2954	622	2947	0
2	12	1	"YAR002W"	"YAR002W"	8740	13920	140	6095	8354	7356	91	120	210	96	91	0	1502	3075	2922	65	83	140	87	78	0	4.178	2.745	2.752	3.399	1.772	2.655	0.962	156	807	7441	11273	2.063	6004	1437	8263	3010	0
2	13	1	"CNS1"	"YBR155W"	8950	13920	140	1981	2952	2461	88	119	213	89	77	0	1889	3124	2844	65	84	183	87	74	0	1.038	0.936	0.981	1.113	1.782	0.898	0.965	156	785	3717	5923	0.054	1893	1824	2864	3059	0
2	14	1	"PCH2"	"YBR186W"	9150	13920	120	447	763	782	91	99	50	95	87	0	508	1126	1386	65	81	169	78	55	0	0.804	0.633	0.705	0.796	1.717	0.548	0.872	120	624	799	1733	-0.315	356	443	672	1061	0
2	15	1	"PYC2"	"YBR218C"	9350	13910	110	585	594	317	91	99	53	90	86	0	1152	1089	708	65	76	86	86	81	0	0.454	0.491	0.487	0.603	2.268	0.451	0.901	80	538	1581	1527	-1.138	494	1087	503	1024	0
2	16	1	"ICS2"	"YBR157C"	9540	13910	130	3199	3023	1847	93	104	93	95	95	0	1747	1720	1103	65	81	145	93	86	0	1.847	1.770	1.751	1.881	1.436	1.732	0.968	120	742	4788	4585	0.885	3106	1682	2930	1655	0
2	17	1	"NTC20"	"YBR188C"	9740	13910	120	563	652	409	92	107	103	86	70	0	1992	2333	1799	65	85	164	88	80	0	0.244	0.247	0.263	0.301	1.920	0.231	0.872	120	637	2398	2828	-2.033	471	1927	560	2268	0
2	18	1	"YBR220C"	"YBR220C"	9960	13900	130	862	1078	703	91	98	108	90	85	0	2650	2999	2258	65	76	103	93	89	0	0.298	0.336	0.346	0.386	1.704	0.319	0.955	120	704	3356	3921	-1.745	771	2585	987	2934	0
2	19	1	"YBR159W"	"YBR159W"	10130	13900	120	1000	914	564	91	100	61	88	83	0	2590	2211	1607	65	92	195	80	72	0	0.360	0.384	0.390	0.499	2.085	0.352	0.940	120	616	3434	2969	-1.474	909	2525	823	2146	0
2	20	1	"YBR190W"	"YBR190W"	10350	13890	110	356	334	172	91	102	62	80	67	0	783	704	471	65	93	199	71	65	0	0.369	0.380	0.374	0.430	2.193	0.365	0.882	80	588	983	882	-1.438	265	718	243	639	0
2	21	1	"FAT2"	"YBR222C"	10550	13880	110	439	424	247	92	96	26	85	80	0	1706	1645	1255	65	83	117	75	75	0	0.211	0.210	0.209	0.270	2.581	0.195	0.876	80	608	1988	1912	-2.242	347	1641	332	1580	0
2	1	2	"YBR161W"	"YBR161W"	6560	14170	130	1708	1778	1012	89	95	42	100	99	0	3946	4095	2576	66	69	46	100	98	0	0.417	0.419	0.423	0.457	1.611	0.407	0.935	120	656	5499	5718	-1.261	1619	3880	1689	4029	0
2	2	2	"RIM2"	"YBR192W"	6770	14170	130	1728	1542	967	87	97	58	96	92	0	3770	3452	2423	66	87	125	91	87	0	0.443	0.430	0.418	0.476	2.019	0.406	0.930	120	633	5345	4841	-1.175	1641	3704	1455	3386	0
2	3	2	"YBR224W"	"YBR224W"	6970	14160	120	1083	1000	598	90	100	57	93	88	0	3420	2901	1954	66	99	152	88	82	0	0.296	0.321	0.324	0.390	2.267	0.305	0.922	120	577	4347	3745	-1.756	993	3354	910	2835	0
2	4	2	"GPM2"	"YDL021W"	7150	14150	110	3480	2938	1724	88	130	223	88	81	0	2851	2263	1413	65	114	244	82	76	0	1.218	1.297	1.285	1.351	2.250	1.249	0.916	80	491	6178	5048	0.284	3392	2786	2850	2198	0
2	5	2	"YDL053C"	"YDL053C"	7350	14150	120	514	471	231	92	125	200	70	54	0	2148	1873	1179	66	107	223	83	79	0	0.203	0.210	0.205	0.242	2.119	0.193	0.800	120	609	2504	2186	-2.303	422	2082	379	1807	0
2	6	2	"YDL085W"	"YDL085W"	7550	14150	120	997	884	438	90	93	31	94	91	0	3241	2749	1691	64	80	104	91	88	0	0.285	0.296	0.296	0.342	1.821	0.265	0.901	120	548	4084	3479	-1.808	907	3177	794	2685	0
2	7	2	"YDL023C"	"YDL023C"	7750	14140	130	895	817	391	91	96	35	97	92	0	2590	2178	1256	63	86	168	92	89	0	0.318	0.343	0.354	0.382	1.611	0.318	0.910	120	631	3331	2841	-1.652	804	2527	726	2115	0
2	8	2	"PSA1"	"YDL055C"	7960	14140	120	755	669	346	93	104	54	85	80	0	813	686	434	65	102	209	74	66	0	0.885	0.928	0.925	0.990	2.122	0.781	0.730	120	562	1410	1197	-0.176	662	748	576	621	0
2	9	2	"LUC7"	"YDL087C"	8150	14140	120	1612	1433	783	93	105	65	93	90	0	4062	3364	2007	66	93	160	90	89	0	0.380	0.406	0.414	0.453	1.623	0.392	0.940	120	532	5515	4638	-1.395	1519	3996	1340	3298	0
2	10	2	"YDL025C"	"YDL025C"	8340	14130	120	2865	2598	1553	93	122	117	92	89	0	2918	2621	1741	65	125	252	87	80	0	0.972	0.980	0.970	1.067	1.644	0.927	0.928	120	585	5625	5061	-0.042	2772	2853	2505	2556	0
2	11	2	"YDL057W"	"YDL057W"	8550	14130	120	840	767	494	93	113	108	77	73	0	1669	1601	1309	67	112	227	72	65	0	0.466	0.439	0.448	0.559	2.006	0.376	0.876	120	612	2349	2208	-1.101	747	1602	674	1534	0
2	12	2	"YDL089W"	"YDL089W"	8750	14120	110	150	157	56	95	108	96	25	2	0	347	327	196	67	95	140	71	50	0	0.196	0.238	0.266	0.272	2.494	0.233	0.644	80	531	335	322	-2.348	55	280	62	260	0
2	13	2	"YDL027C"	"YDL027C"	8960	14120	120	2221	1939	942	90	96	32	100	98	0	4265	3600	2006	67	83	99	94	92	0	0.508	0.523	0.522	0.617	1.727	0.501	0.947	120	573	6329	5382	-0.978	2131	4198	1849	3533	0
2	14	2	"RAD59"	"YDL059C"	9170	14120	120	1108	1026	528	91	100	50	95	93	0	2561	2173	1358	65	97	218	90	83	0	0.407	0.444	0.456	0.534	2.017	0.414	0.933	120	572	3513	3043	-1.295	1017	2496	935	2108	0
2	15	2	"YDL091C"	"YDL091C"	9370	14120	120	4342	3954	1793	90	97	45	100	100	0	4061	3760	1901	65	80	129	98	96	0	1.064	1.046	1.047	1.127	1.483	1.025	0.944	120	641	8248	7559	0.090	4252	3996	3864	3695	0
2	16	2	"RPA14"	"YDR156W"	9570	14120	90	131	149	65	93	95	30	59	40	0	223	503	454	66	76	54	78	73	0	0.242	0.128	0.155	0.218	3.949	0.126	0.613	52	396	195	493	-2.047	38	157	56	437	0
2	17	2	"YDR187C"	"YDR187C"	9760	14100	120	264	333	241	90	97	111	63	41	0	590	857	779	66	75	93	80	73	0	0.332	0.307	0.317	0.347	1.818	0.318	0.591	120	654	698	1034	-1.590	174	524	243	791	0
2	18	2	"YDR219C"	"YDR219C"	9990	14110	100	196	262	164	89	99	129	46	25	0	286	457	433	66	73	105	66	51	0	0.486	0.442	0.453	0.528	2.093	0.341	0.732	80	479	327	564	-1.040	107	220	173	391	0
2	19	2	"HOM2"	"YDR158W"	10170	14100	120	6292	6275	4308	91	98	44	99	98	0	7378	6476	4933	65	77	77	92	90	0	0.848	0.965	0.985	1.302	2.369	0.923	0.961	120	546	13514	12595	-0.238	6201	7313	6184	6411	0
2	20	2	"SLY1"	"YDR189W"	10360	14100	120	1667	1713	1158	91	102	54	93	91	0	2558	2334	1717	65	83	95	88	81	0	0.632	0.715	0.719	0.906	2.031	0.694	0.959	120	600	4069	3891	-0.662	1576	2493	1622	2269	0
2	21	2	"YDR221W"	"YDR221W"	10580	14100	110	340	480	402	91	98	40	82	72	0	773	1231	1231	65	76	89	80	73	0	0.352	0.334	0.308	0.353	2.116	0.320	0.923	80	602	957	1555	-1.508	249	708	389	1166	0
2	1	3	"SSY1"	"YDR160W"	6570	14370	130	2388	2270	1455	90	94	30	95	93	0	4217	4190	3033	65	68	41	90	89	0	0.553	0.528	0.536	0.635	1.953	0.498	0.937	120	690	6450	6305	-0.853	2298	4152	2180	4125	0
2	2	3	"HST4"	"YDR191W"	6780	14370	120	487	509	328	88	95	45	85	77	0	2290	2216	1752	66	74	54	85	81	0	0.179	0.196	0.208	0.264	2.463	0.184	0.901	120	581	2623	2571	-2.479	399	2224	421	2150	0
2	3	3	"YDR223W"	"YDR223W"	6960	14370	80	219	229	110	91	99	45	73	57	0	436	419	271	68	92	122	75	59	0	0.348	0.393	0.396	0.406	1.892	0.405	0.812	52	322	496	489	-1.524	128	368	138	351	0
2	4	3	"NBP2"	"YDR162C"	7200	14360	120	164	337	439	87	109	169	26	18	0	182	500	816	67	90	187	35	24	0	0.670	0.577	0.597	0.642	2.502	0.516	0.856	120	668	192	683	-0.579	77	115	250	433	0
2	5	3	"YDR193W"	"YDR193W"	7390	14370	110	596	565	357	92	94	27	82	81	0	1359	1266	945	65	73	54	80	77	0	0.389	0.394	0.400	0.434	1.973	0.364	0.910	80	520	1798	1674	-1.360	504	1294	473	1201	0
2	6	3	"HTA1"	"YDR225W"	7580	14350	120	1693	1934	1423	93	103	64	86	83	0	2424	2520	2068	65	93	120	80	78	0	0.678	0.750	0.753	0.911	2.073	0.711	0.930	120	556	3959	4296	-0.560	1600	2359	1841	2455	0
2	7	3	"YDR539W"	"YDR539W"	7770	14350	120	720	766	502	89	100	63	91	86	0	1450	1644	1324	65	85	112	85	77	0	0.456	0.429	0.433	0.547	2.250	0.391	0.897	120	583	2016	2256	-1.134	631	1385	677	1579	0
2	8	3	"YEL025C"	"YEL025C"	7980	14340	120	861	1242	1256	87	94	63	86	76	0	1301	1673	1680	65	77	171	72	67	0	0.626	0.718	0.719	0.801	2.124	0.726	0.944	120	573	2010	2763	-0.675	774	1236	1155	1608	0
2	9	3	"YEL057C"	"YEL057C"	8180	14340	120	872	882	480	91	96	32	95	94	0	2094	2299	1538	66	84	116	94	90	0	0.385	0.354	0.360	0.398	1.669	0.326	0.904	120	561	2809	3024	-1.377	781	2028	791	2233	0
2	10	3	"YDR541C"	"YDR541C"	8390	14330	110	434	594	444	93	100	38	88	85	0	967	1459	1373	65	79	76	81	72	0	0.378	0.359	0.391	0.511	2.601	0.334	0.919	80	531	1243	1895	-1.403	341	902	501	1394	0
2	11	3	"CUP5"	"YEL027W"	8590	14330	120	878	1004	729	94	97	32	93	90	0	1216	1676	1404	67	78	63	87	83	0	0.682	0.566	0.577	0.653	2.053	0.533	0.938	120	611	1933	2519	-0.551	784	1149	910	1609	0
2	12	3	"SOM1"	"YEL059C-A"	8810	14330	120	212	280	176	90	95	32	78	62	0	624	1012	872	66	76	63	83	79	0	0.219	0.201	0.195	0.228	2.186	0.185	0.850	120	576	680	1136	-2.193	122	558	190	946	0
2	13	3	"YDR543C"	"YDR543C"	8990	14320	150	128	161	91	88	94	37	51	35	0	105	204	181	65	74	78	43	35	0	1.000	0.525	0.630	0.689	2.564	0.482	0.741	156	647	80	212	0.000	40	40	73	139	-50
2	14	3	"YEL029C"	"YEL029C"	9170	14320	120	1813	1829	1240	89	96	46	94	93	0	1425	1380	1021	65	73	68	84	80	0	1.268	1.323	1.332	1.545	1.949	1.278	0.922	120	545	3084	3055	0.342	1724	1360	1740	1315	0
2	15	3	"PRB1"	"YEL060C"	9380	14320	100	174	197	90	91	96	38	71	55	0	296	260	145	66	71	46	76	68	0	0.361	0.546	0.504	0.497	2.370	0.503	0.689	80	474	313	300	-1.470	83	230	106	194	0
2	16	3	"YRF1-1"	"YDR545W"	9590	14320	120	1111	1703	1645	90	94	29	100	99	0	2011	3175	3207	66	71	45	95	95	0	0.525	0.519	0.534	0.588	1.943	0.508	0.950	120	667	2966	4722	-0.930	1021	1945	1613	3109	0
2	17	3	"SPF1"	"YEL031W"	9800	14300	90	151	171	77	87	92	32	73	50	0	237	245	159	67	71	40	76	73	0	0.376	0.472	0.501	0.482	2.522	0.445	0.648	52	417	234	262	-1.409	64	170	84	178	0
2	18	3	"NPR2"	"YEL062W"	10020	14300	110	625	891	772	91	96	44	87	75	0	1572	2183	2071	64	70	68	82	77	0	0.354	0.378	0.393	0.463	2.090	0.375	0.957	80	527	2042	2919	-1.498	534	1508	800	2119	0
2	19	3	"PES4"	"YFR023W"	10200	14300	120	3942	4313	3064	93	99	40	99	98	0	2335	2560	1960	64	73	55	94	92	0	1.695	1.691	1.704	1.958	1.683	1.652	0.963	120	490	6120	6716	0.761	3849	2271	4220	2496	0
2	20	3	"HXK1"	"YFR053C"	10360	14290	130	2505	2994	2304	96	121	75	95	92	0	2033	2664	2259	69	95	80	90	82	0	1.227	1.117	1.128	1.381	1.741	1.058	0.966	120	571	4373	5493	0.295	2409	1964	2898	2595	0
2	21	3	"SCW11"	"YGL028C"	10590	14300	130	2595	3166	2536	93	110	63	96	91	0	2887	3056	2593	67	85	71	86	83	0	0.887	1.028	1.050	1.222	1.933	1.006	0.966	120	746	5322	6062	-0.173	2502	2820	3073	2989	0
2	1	4	"YFR024C-A"	"YFR024C-A"	6590	14560	90	392	539	409	91	106	123	78	55	0	466	653	643	68	78	111	75	61	0	0.756	0.766	0.892	0.828	1.718	0.661	0.843	52	399	699	1033	-0.403	301	398	448	585	0
2	2	4	"YFR055W"	"YFR055W"	6800	14570	130	957	1474	1227	89	105	106	95	85	0	1530	2435	2196	67	88	116	90	88	0	0.593	0.585	0.626	0.681	1.674	0.574	0.933	120	683	2331	3753	-0.753	868	1463	1385	2368	0
2	3	4	"RPL30"	"YGL030W"	6990	14560	120	531	510	306	89	97	45	83	78	0	1783	1755	1389	68	99	138	82	75	0	0.258	0.250	0.260	0.316	2.589	0.218	0.853	120	595	2157	2108	-1.956	442	1715	421	1687	0
2	4	4	"YFR026C"	"YFR026C"	7210	14560	130	587	654	440	90	96	40	88	82	0	2306	2484	1970	69	104	137	85	78	0	0.222	0.234	0.244	0.258	1.738	0.221	0.877	120	703	2734	2979	-2.170	497	2237	564	2415	0
2	5	4	"YFR057W"	"YFR057W"	7430	14550	80	470	564	405	89	90	24	98	96	0	515	760	717	69	73	48	90	88	0	0.854	0.687	0.718	0.784	1.905	0.597	0.868	52	313	827	1166	-0.227	381	446	475	691	0
2	6	4	"AGA2"	"YGL032C"	7600	14550	130	793	780	450	91	97	38	95	91	0	2535	2243	1456	66	79	74	94	90	0	0.284	0.316	0.325	0.347	1.884	0.305	0.909	120	678	3171	2866	-1.814	702	2469	689	2177	0
2	7	4	"CDC14"	"YFR028C"	7820	14550	120	1695	1968	1475	88	93	29	96	95	0	2202	2651	2108	65	73	60	90	89	0	0.752	0.727	0.754	0.805	1.947	0.709	0.916	120	519	3744	4466	-0.411	1607	2137	1880	2586	0
2	8	4	"ERP6"	"YGL002W"	7980	14540	130	3975	5028	3811	89	188	346	93	84	0	1871	2211	1853	67	115	184	80	71	0	2.154	2.304	2.319	2.770	1.937	2.221	0.946	120	578	5690	7083	1.107	3886	1804	4939	2144	0
2	9	4	"YGL034C"	"YGL034C"	8200	14530	150	137	166	116	91	165	299	1	0	0	220	350	302	67	109	166	48	40	0	0.301	0.265	0.265	0.305	2.643	1.639	0.414	156	789	199	358	-1.734	46	153	75	283	-50
2	10	4	"RPL11B"	"YGR085C"	8400	14530	130	1077	1151	899	90	105	65	82	75	0	2622	2914	2548	65	110	189	71	65	0	0.386	0.372	0.385	0.502	2.716	0.352	0.924	120	602	3544	3910	-1.373	987	2557	1061	2849	0
2	11	4	"YGR117C"	"YGR117C"	8590	14530	120	1957	1854	1178	94	113	74	93	89	0	3082	3070	2105	69	129	207	86	85	0	0.618	0.586	0.587	0.646	1.786	0.568	0.924	120	574	4876	4761	-0.694	1863	3013	1760	3001	0
2	12	4	"YGR149W"	"YGR149W"	8810	14530	120	608	1147	1050	88	97	41	90	82	0	1328	2337	2322	67	79	63	85	84	0	0.412	0.467	0.489	0.550	2.187	0.453	0.923	120	561	1781	3329	-1.278	520	1261	1059	2270	0
2	13	4	"PDC6"	"YGR087C"	8990	14520	120	952	995	635	88	93	30	96	92	0	2228	2396	1698	66	73	47	93	90	0	0.400	0.389	0.392	0.423	1.689	0.372	0.924	120	545	3026	3237	-1.323	864	2162	907	2330	0
2	14	4	"NUP57"	"YGR119C"	9210	14520	120	883	951	644	91	97	41	92	88	0	2800	3164	2463	68	81	84	91	90	0	0.290	0.278	0.285	0.320	1.943	0.263	0.912	120	608	3524	3956	-1.786	792	2732	860	3096	0
2	15	4	"YGR151C"	"YGR151C"	9410	14520	140	1797	1590	961	91	97	45	95	90	0	1582	1358	859	68	86	131	82	80	0	1.127	1.162	1.166	1.213	1.488	1.128	0.942	156	674	3220	2789	0.172	1706	1514	1499	1290	0
2	16	4	"YGR089W"	"YGR089W"	9610	14520	130	937	1314	1131	90	99	56	94	88	0	1473	2328	2225	67	83	127	83	80	0	0.602	0.541	0.560	0.632	1.854	0.515	0.936	120	578	2253	3485	-0.731	847	1406	1224	2261	0
2	17	4	"MEP1"	"YGR121C"	9800	14510	120	505	769	658	89	92	25	94	90	0	2055	2893	2789	68	76	75	91	87	0	0.209	0.241	0.256	0.291	2.139	0.233	0.928	120	592	2403	3505	-2.256	416	1987	680	2825	0
2	18	4	"YGR153W"	"YGR153W"	10000	14500	130	1444	1436	927	92	99	43	90	87	0	2948	2633	1866	66	85	102	86	82	0	0.469	0.524	0.531	0.588	2.006	0.505	0.945	120	664	4234	3911	-1.092	1352	2882	1344	2567	0
2	19	4	"PRP31"	"YGR091W"	10220	14500	120	1336	1655	1289	94	106	55	91	88	0	1761	2080	1765	67	83	76	85	79	0	0.733	0.775	0.790	0.925	1.995	0.754	0.942	120	552	2936	3574	-0.448	1242	1694	1561	2013	0
2	20	4	"PPT1"	"YGR123C"	10400	14490	120	1354	1292	893	96	114	81	89	83	0	2934	2622	2109	68	95	133	82	74	0	0.439	0.468	0.470	0.577	2.089	0.436	0.944	120	580	4124	3750	-1.188	1258	2866	1196	2554	0
2	21	4	"CYS4"	"YGR155W"	10610	14490	130	771	808	496	92	98	35	96	93	0	2964	2961	2100	66	85	109	90	85	0	0.234	0.247	0.262	0.302	2.193	0.235	0.929	120	718	3577	3611	-2.094	679	2898	716	2895	0
2	1	5	"SET1"	"YHR119W"	6610	14770	120	812	1242	1109	87	92	30	95	92	0	1005	1650	1606	65	67	29	90	85	0	0.771	0.729	0.716	0.846	1.888	0.701	0.958	120	687	1665	2740	-0.375	725	940	1155	1585	0
2	2	5	"YHR149C"	"YHR149C"	6800	14770	90	359	523	424	92	108	77	75	57	0	564	846	794	71	103	152	69	51	0	0.542	0.556	0.556	0.702	2.780	0.535	0.933	52	389	760	1206	-0.885	267	493	431	775	0
2	3	5	"YHR181W"	"YHR181W"	7000	14760	130	161	171	67	89	98	61	55	30	0	795	876	638	70	102	169	75	67	0	0.099	0.102	0.113	0.127	2.708	0.092	0.501	120	666	797	888	-3.332	72	725	82	806	0
2	4	5	"YHR121W"	"YHR121W"	7200	14760	120	544	716	607	88	93	34	91	85	0	779	1103	1045	69	86	120	80	75	0	0.642	0.607	0.619	0.652	1.727	0.580	0.922	120	590	1166	1662	-0.639	456	710	628	1034	0
2	5	5	"YHR151C"	"YHR151C"	7410	14750	100	175	260	211	91	93	28	70	57	0	368	790	907	71	77	41	78	76	0	0.283	0.235	0.252	0.252	2.289	0.225	0.878	80	485	381	888	-1.822	84	297	169	719	0
2	6	5	"GND1"	"YHR183W"	7580	14750	80	433	473	270	94	108	74	86	82	0	771	729	398	73	109	217	84	71	0	0.486	0.578	0.577	0.565	1.459	0.479	0.666	52	326	1037	1035	-1.042	339	698	379	656	0
2	7	5	"EPT1"	"YHR123W"	7800	14740	130	141	257	242	91	99	54	47	36	0	152	503	729	69	80	85	49	35	0	0.602	0.382	0.387	0.443	2.557	0.324	0.827	120	714	133	600	-0.731	50	83	166	434	0
2	8	5	"SPO16"	"YHR153C"	8020	14730	100	487	712	599	92	108	81	80	67	0	988	1330	1230	69	77	47	81	80	0	0.430	0.492	0.472	0.529	1.940	0.484	0.950	80	495	1314	1881	-1.218	395	919	620	1261	0
2	9	5	"ADY1"	"YHR185C"	8210	14730	90	281	408	300	90	94	30	86	82	0	381	483	414	67	71	34	80	76	0	0.608	0.764	0.774	0.746	2.031	0.727	0.862	52	400	505	734	-0.717	191	314	318	416	0
2	10	5	"YHR125W"	"YHR125W"	8420	14730	130	510	853	718	87	94	43	91	82	0	1589	2797	2676	66	83	107	81	75	0	0.278	0.280	0.291	0.394	2.777	0.273	0.968	120	681	1946	3497	-1.848	423	1523	766	2731	0
2	11	5	"YHR155W"	"YHR155W"	8620	14730	120	408	797	794	88	93	31	91	87	0	709	1601	1933	67	77	79	84	81	0	0.498	0.462	0.501	0.552	1.968	0.420	0.950	120	577	962	2243	-1.005	320	642	709	1534	0
2	12	5	"IKI1"	"YHR187W"	8800	14720	110	144	193	116	85	89	23	77	60	0	362	655	671	67	70	36	86	81	0	0.200	0.184	0.200	0.223	3.115	0.147	0.699	80	486	354	696	-2.322	59	295	108	588	0
2	13	5	"YHC3"	"YJL059W"	8980	14710	100	583	841	743	90	99	65	86	73	0	1172	1814	1813	70	94	171	77	70	0	0.447	0.431	0.440	0.555	1.930	0.404	0.969	80	480	1595	2495	-1.160	493	1102	751	1744	0
2	14	5	"YJL091C"	"YJL091C"	9190	14720	80	317	505	414	93	113	99	75	59	0	492	795	782	75	106	183	73	55	0	0.537	0.572	0.609	0.622	2.032	0.530	0.929	52	340	641	1132	-0.897	224	417	412	720	0
2	15	5	"YJL123C"	"YJL123C"	9400	14720	120	1309	1634	1337	92	108	83	88	80	0	3337	3733	3338	70	116	248	75	72	0	0.373	0.421	0.413	0.543	2.142	0.405	0.960	120	577	4484	5205	-1.425	1217	3267	1542	3663	0
2	16	5	"NUP82"	"YJL061W"	9580	14700	110	1369	1994	1749	94	110	74	90	83	0	1766	2662	2447	69	101	157	82	78	0	0.751	0.733	0.732	0.825	1.908	0.720	0.967	80	516	2972	4493	-0.412	1275	1697	1900	2593	0
2	17	5	"TOK1"	"YJL093C"	9840	14710	120	1643	1898	1531	89	93	27	98	94	0	2962	3234	2796	66	70	40	92	88	0	0.537	0.571	0.601	0.749	1.887	0.556	0.962	120	563	4450	4977	-0.898	1554	2896	1809	3168	0
2	18	5	"GCD14"	"YJL125C"	9990	14700	130	1333	1186	755	91	108	67	90	85	0	2976	2847	2145	68	115	188	85	77	0	0.427	0.394	0.406	0.481	1.788	0.363	0.950	120	613	4150	3874	-1.227	1242	2908	1095	2779	0
2	19	5	"MRPL8"	"YJL063C"	10220	14700	120	288	294	129	94	112	74	79	63	0	927	947	602	68	116	188	80	75	0	0.226	0.228	0.240	0.243	1.938	0.212	0.845	120	561	1053	1079	-2.147	194	859	200	879	0
2	20	5	"BCK1"	"YJL095W"	10380	14700	110	900	1423	1341	93	113	122	81	72	0	1322	2339	2461	69	107	237	75	63	0	0.644	0.586	0.602	0.669	1.910	0.557	0.976	80	506	2060	3600	-0.635	807	1253	1330	2270	0
2	21	5	"SPT10"	"YJL127C"	10620	14690	100	201	226	131	91	93	27	76	70	0	479	602	545	66	73	94	71	66	0	0.266	0.252	0.263	0.313	2.202	0.229	0.806	80	512	523	671	-1.909	110	413	135	536	0
2	1	6	"YJL065C"	"YJL065C"	6620	14970	120	303	373	252	86	89	27	80	72	0	974	1406	1252	65	82	137	78	67	0	0.239	0.214	0.230	0.269	2.414	0.195	0.876	120	629	1126	1628	-2.067	217	909	287	1341	0
2	2	6	"YJL097W"	"YJL097W"	6820	14970	120	1076	1263	980	89	109	80	82	79	0	1225	1871	1704	68	111	141	75	65	0	0.853	0.651	0.656	0.826	2.271	0.584	0.889	120	593	2144	2977	-0.229	987	1157	1174	1803	0
2	3	6	"TRK1"	"YJL129C"	7020	14970	120	1197	1575	1359	90	111	82	90	84	0	2155	2822	2789	67	110	154	80	74	0	0.530	0.539	0.581	0.704	2.150	0.501	0.952	120	544	3195	4240	-0.915	1107	2088	1485	2755	0
2	4	6	"OAR1"	"YKL055C"	7210	14960	120	520	649	534	88	95	32	85	76	0	970	1578	1516	68	84	70	80	75	0	0.479	0.372	0.372	0.448	2.213	0.351	0.943	120	548	1334	2071	-1.062	432	902	561	1510	0
2	5	6	"CYT2"	"YKL087C"	7410	14950	120	402	615	534	89	96	38	78	70	0	780	1697	1795	70	92	102	71	63	0	0.441	0.323	0.347	0.432	2.625	0.302	0.951	120	570	1023	2153	-1.182	313	710	526	1627	0
2	6	6	"YKL118W"	"YKL118W"	7600	14950	120	973	889	537	94	115	85	83	78	0	1067	932	657	70	112	188	70	66	0	0.882	0.922	0.880	0.982	1.877	0.860	0.913	120	623	1876	1657	-0.182	879	997	795	862	0
2	7	6	"NUP120"	"YKL057C"	7820	14930	110	291	562	524	92	116	89	71	52	0	425	1136	1355	72	103	118	63	53	0	0.564	0.442	0.462	0.598	2.510	0.398	0.934	80	545	552	1534	-0.827	199	353	470	1064	0
2	8	6	"MIF2"	"YKL089W"	8020	14940	130	344	873	993	91	97	33	93	85	0	671	1987	2612	70	85	84	86	74	0	0.421	0.408	0.424	0.494	2.252	0.381	0.954	120	674	854	2699	-1.248	253	601	782	1917	0
2	9	6	"OAC1"	"YKL120W"	8210	14940	100	181	274	224	90	95	30	70	60	0	324	819	1012	70	84	90	67	53	0	0.358	0.246	0.259	0.354	3.122	0.210	0.831	80	474	345	933	-1.481	91	254	184	749	0
2	10	6	"YKL059C"	"YKL059C"	8430	14930	110	810	1652	1631	88	94	33	96	92	0	813	2388	2676	68	76	62	87	85	0	0.969	0.674	0.751	0.901	1.981	0.621	0.962	80	546	1467	3884	-0.045	722	745	1564	2320	0
2	11	6	"YKL091C"	"YKL091C"	8590	14920	90	154	240	187	94	99	35	51	50	0	452	1170	1351	75	107	162	71	53	0	0.159	0.133	0.142	0.152	2.077	0.123	0.899	52	376	437	1241	-2.652	60	377	146	1095	0
2	12	6	"SRP21"	"YKL122C"	8800	14920	90	159	203	118	91	95	29	69	53	0	454	813	748	71	88	95	75	65	0	0.178	0.151	0.162	0.209	2.661	0.138	0.786	52	414	451	854	-2.494	68	383	112	742	0
2	13	6	"YKL061W"	"YKL061W"	9010	14920	130	626	670	472	91	101	46	86	78	0	680	1211	1069	71	100	127	75	65	0	0.878	0.508	0.508	0.653	2.130	0.455	0.926	120	715	1144	1719	-0.187	535	609	579	1140	0
2	14	6	"MBR1"	"YKL093W"	9220	14920	130	2372	2311	1648	92	106	64	96	94	0	2971	3150	2407	70	109	191	90	85	0	0.786	0.720	0.736	0.867	1.943	0.705	0.932	120	657	5181	5299	-0.348	2280	2901	2219	3080	0
2	15	6	"SSH4"	"YKL124W"	9410	14920	120	1544	1578	1140	93	105	58	92	87	0	3429	3711	3005	70	116	227	80	74	0	0.432	0.408	0.414	0.496	1.916	0.384	0.932	120	580	4810	5126	-1.211	1451	3359	1485	3641	0
2	16	6	"YLR040C"	"YLR040C"	9620	14900	110	741	1060	849	97	112	72	91	80	0	1101	1662	1518	70	114	184	78	70	0	0.625	0.605	0.655	0.713	1.725	0.563	0.943	80	576	1675	2555	-0.679	644	1031	963	1592	0
2	17	6	"YLR072W"	"YLR072W"	9830	14900	100	218	269	161	90	96	35	77	67	0	323	394	323	67	75	60	77	62	0	0.500	0.547	0.501	0.505	1.945	0.490	0.821	80	488	384	506	-1.000	128	256	179	327	0
2	18	6	"YLR104W"	"YLR104W"	10040	14900	100	195	254	166	90	101	65	57	43	0	427	1035	1111	69	84	93	75	61	0	0.293	0.170	0.193	0.241	2.366	0.147	0.854	80	476	463	1130	-1.770	105	358	164	966	0
2	19	6	"YLR042C"	"YLR042C"	10230	14900	120	800	1445	1351	88	96	57	91	87	0	693	1651	1667	69	77	75	86	82	0	1.141	0.858	0.850	0.970	1.858	0.825	0.932	120	550	1336	2939	0.190	712	624	1357	1582	0
2	20	6	"YLR074C"	"YLR074C"	10400	14890	110	192	289	206	88	95	34	73	60	0	374	1083	1147	70	92	146	67	52	0	0.342	0.198	0.207	0.254	2.528	0.179	0.878	80	526	408	1214	-1.547	104	304	201	1013	0
2	21	6	"YLR106C"	"YLR106C"	10620	14890	120	1000	1648	1698	89	94	32	94	90	0	574	1203	1279	66	80	104	75	69	0	1.793	1.371	1.371	1.453	1.934	1.348	0.970	120	652	1419	2696	0.843	911	508	1559	1137	0
2	1	7	"PDC1"	"YLR044C"	6620	15160	100	713	1069	1028	89	93	30	91	83	0	1089	2003	2205	68	86	152	76	72	0	0.611	0.506	0.546	0.581	1.676	0.457	0.910	80	524	1645	2915	-0.710	624	1021	980	1935	0
2	2	7	"YLR076C"	"YLR076C"	6850	15170	120	247	324	210	87	95	44	78	67	0	932	1286	1182	68	92	92	78	73	0	0.185	0.195	0.216	0.258	2.320	0.170	0.808	120	588	1024	1455	-2.433	160	864	237	1218	0
2	3	7	"YLR108C"	"YLR108C"	7030	15160	130	239	526	603	88	95	39	87	73	0	459	1378	1967	67	88	90	75	65	0	0.385	0.334	0.401	0.458	2.489	0.302	0.909	120	591	543	1749	-1.376	151	392	438	1311	0
2	4	7	"YLR046C"	"YLR046C"	7240	15160	120	726	868	660	88	101	78	80	74	0	1557	1729	1418	68	86	107	82	78	0	0.428	0.470	0.480	0.479	1.798	0.454	0.909	120	628	2127	2441	-1.223	638	1489	780	1661	0
2	5	7	"BOS1"	"YLR078C"	7450	15150	130	419	810	760	88	101	76	80	67	0	697	1810	1890	68	83	107	79	70	0	0.526	0.414	0.424	0.478	1.958	0.400	0.914	120	644	960	2464	-0.926	331	629	722	1742	0
2	6	7	"YLR110C"	"YLR110C"	7650	15150	120	528	873	747	89	98	44	92	88	0	1102	1997	1923	67	88	148	85	78	0	0.424	0.406	0.435	0.484	1.928	0.388	0.913	120	537	1474	2714	-1.237	439	1035	784	1930	0
2	7	7	"YLR423C"	"YLR423C"	7830	15150	120	1050	1396	1187	87	92	37	90	85	0	1638	2255	2049	68	83	126	79	75	0	0.613	0.599	0.605	0.643	2.257	0.580	0.919	120	541	2533	3496	-0.705	963	1570	1309	2187	0
2	8	7	"YLR455W"	"YLR455W"	8020	15140	120	973	1393	1207	88	95	35	90	87	0	1353	2030	2017	68	79	57	85	75	0	0.689	0.665	0.656	0.835	2.029	0.615	0.950	120	549	2170	3267	-0.538	885	1285	1305	1962	0
2	9	7	"PSP2"	"YML017W"	8210	15130	150	99	165	183	91	98	35	28	19	0	80	205	344	69	79	52	23	17	0	0.727	0.544	0.832	0.887	3.246	0.511	0.790	156	761	19	210	-0.459	8	11	74	136	-50
2	10	7	"TUS1"	"YLR425W"	8410	15140	100	527	756	663	90	95	39	91	87	0	1045	1720	1917	70	84	115	81	75	0	0.448	0.404	0.443	0.529	2.094	0.354	0.938	80	460	1412	2316	-1.158	437	975	666	1650	0
2	11	7	"NBP1"	"YLR457C"	8600	15130	80	543	900	869	91	120	142	65	51	0	1303	2437	2510	77	163	407	61	53	0	0.369	0.343	0.355	0.389	2.313	0.336	0.969	52	340	1678	3169	-1.440	452	1226	809	2360	0
2	12	7	"OST6"	"YML019W"	8810	15120	120	1316	1380	1058	92	110	108	84	77	0	2208	2446	2074	72	123	303	71	65	0	0.573	0.543	0.553	0.644	2.016	0.518	0.960	120	633	3360	3662	-0.803	1224	2136	1288	2374	0
2	13	7	"YLR427W"	"YLR427W"	9020	15120	120	415	906	1024	90	97	38	89	80	0	852	2560	3317	71	91	103	80	70	0	0.416	0.328	0.347	0.415	1.922	0.311	0.974	120	642	1106	3305	-1.265	325	781	816	2489	0
2	14	7	"CDC91"	"YLR459W"	9260	15120	120	336	636	658	88	98	59	79	64	0	795	2248	2839	70	90	115	83	71	0	0.342	0.252	0.274	0.289	1.830	0.231	0.934	120	608	973	2726	-1.548	248	725	548	2178	0
2	15	7	"UNG1"	"YML021C"	9460	15120	120	399	923	949	91	97	57	82	70	0	641	2387	2806	70	87	120	79	73	0	0.539	0.359	0.386	0.468	2.175	0.344	0.954	120	538	879	3149	-0.891	308	571	832	2317	0
2	16	7	"CRN1"	"YLR429W"	9640	15110	120	902	1248	1026	91	99	59	90	80	0	2812	3857	3524	69	86	115	88	83	0	0.296	0.305	0.313	0.388	2.029	0.295	0.970	120	529	3554	4945	-1.758	811	2743	1157	3788	0
2	17	7	"PAU4"	"YLR461W"	9820	15100	130	3954	4385	3558	92	135	237	86	80	0	5948	7485	6568	69	158	483	79	71	0	0.657	0.579	0.581	0.761	2.186	0.547	0.966	120	620	9741	11709	-0.606	3862	5879	4293	7416	0
2	18	7	"YML023C"	"YML023C"	10030	15100	120	1125	2085	2190	91	143	247	82	70	0	774	1839	2131	69	166	495	60	41	0	1.467	1.127	1.225	1.495	1.936	1.053	0.952	120	590	1739	3764	0.553	1034	705	1994	1770	0
2	19	7	"YMR187C"	"YMR187C"	10210	15090	110	184	356	388	90	101	60	62	38	0	234	628	856	71	81	56	71	63	0	0.577	0.478	0.480	0.470	2.706	0.450	0.904	80	498	257	823	-0.794	94	163	266	557	0
2	20	7	"TRS130"	"YMR218C"	10410	15100	90	163	203	113	89	95	34	65	50	0	193	286	228	73	87	79	59	46	0	0.617	0.535	0.497	0.519	2.148	0.452	0.815	52	399	194	327	-0.697	74	120	114	213	0
2	21	7	"YMR251W"	"YMR251W"	10610	15080	150	95	104	43	91	96	35	17	10	0	68	99	92	70	83	96	14	10	0	-2.000	0.448	0.615	0.677	3.739	0.379	0.373	156	893	2	42	Error	4	-2	13	29	-50
2	1	8	"GCV2"	"YMR189W"	6660	15380	100	224	328	265	88	91	29	78	67	0	248	392	367	69	86	122	61	40	0	0.760	0.743	0.700	0.784	2.061	0.714	0.877	80	507	315	563	-0.396	136	179	240	323	0
2	2	8	"ERG8"	"YMR220W"	6850	15360	110	409	636	606	87	92	32	87	77	0	872	2267	2796	70	83	82	83	76	0	0.401	0.250	0.264	0.320	2.028	0.218	0.904	80	539	1124	2746	-1.317	322	802	549	2197	0
2	3	8	"YMR252C"	"YMR252C"	7050	15350	100	498	1118	1069	89	99	42	85	81	0	556	1252	1263	70	89	121	66	61	0	0.842	0.871	0.854	0.962	2.087	0.856	0.956	80	499	895	2211	-0.249	409	486	1029	1182	0
2	4	8	"YMR191W"	"YMR191W"	7290	15360	80	275	355	231	86	97	45	80	71	0	446	812	726	68	86	117	76	67	0	0.500	0.362	0.345	0.389	2.152	0.330	0.830	52	324	567	1013	-1.000	189	378	269	744	0
2	5	8	"YMR222C"	"YMR222C"	7450	15340	80	152	274	258	91	95	26	75	53	0	232	906	1446	69	87	100	61	44	0	0.374	0.219	0.251	0.268	2.286	0.166	0.896	52	316	224	1020	-1.418	61	163	183	837	0
2	6	8	"YMR254C"	"YMR254C"	7640	15350	120	483	1146	1287	91	106	60	84	74	0	309	870	1042	69	90	128	60	48	0	1.633	1.317	1.313	1.306	2.392	1.269	0.937	120	570	632	1856	0.708	392	240	1055	801	0
2	7	8	"YMR193C-A"	"YMR193C-A"	7830	15340	130	250	266	155	90	106	61	65	51	0	856	1261	1074	71	117	252	66	56	0	0.204	0.148	0.157	0.174	2.256	0.122	0.619	120	676	945	1366	-2.295	160	785	176	1190	0
2	8	8	"MRE11"	"YMR224C"	8070	15340	90	339	349	199	90	94	30	88	82	0	491	518	398	68	71	33	78	76	0	0.589	0.576	0.569	0.588	1.996	0.520	0.845	52	407	672	709	-0.765	249	423	259	450	0
2	9	8	"COX7"	"YMR256C"	8270	15340	120	632	880	672	91	95	29	92	90	0	453	643	511	68	73	120	75	58	0	1.405	1.372	1.376	1.440	1.881	1.373	0.925	120	504	926	1364	0.491	541	385	789	575	0
2	10	8	"NAR1"	"YNL240C"	8440	15330	150	265	530	517	90	94	31	78	67	0	428	1080	1248	70	78	66	74	61	0	0.489	0.436	0.469	0.523	1.945	0.414	0.949	156	640	533	1450	-1.033	175	358	440	1010	0
2	11	8	"SEC2"	"YNL272C"	8630	15330	120	609	1105	1210	89	97	43	92	86	0	924	1869	2279	71	89	84	85	79	0	0.610	0.565	0.607	0.674	1.990	0.531	0.929	120	560	1373	2814	-0.714	520	853	1016	1798	0
2	12	8	"YPT11"	"YNL304W"	8840	15320	150	242	481	569	92	99	37	67	58	0	461	1488	2201	72	101	98	66	54	0	0.386	0.275	0.319	0.376	2.496	0.249	0.910	156	787	539	1805	-1.375	150	389	389	1416	0
2	13	8	"YNL242W"	"YNL242W"	9040	15320	110	1717	2177	1771	90	99	52	93	90	0	2802	3424	3054	73	98	97	92	85	0	0.596	0.623	0.603	0.661	1.970	0.593	0.955	80	530	4356	5438	-0.746	1627	2729	2087	3351	0
2	14	8	"YNL274C"	"YNL274C"	9270	15320	120	1009	1368	1172	87	99	62	90	85	0	1508	2518	2290	71	88	144	82	78	0	0.642	0.523	0.552	0.609	1.936	0.511	0.938	120	559	2359	3728	-0.640	922	1437	1281	2447	0
2	15	8	"YNL306W"	"YNL306W"	9440	15320	130	287	474	380	89	96	49	84	65	0	862	1635	1613	69	89	153	73	66	0	0.250	0.246	0.256	0.323	2.410	0.238	0.928	120	528	991	1951	-2.002	198	793	385	1566	0
2	16	8	"SUI1"	"YNL244C"	9640	15310	120	909	945	641	89	94	33	90	83	0	1349	1200	929	70	79	62	76	74	0	0.641	0.758	0.765	0.927	2.362	0.721	0.922	120	544	2099	1986	-0.641	820	1279	856	1130	0
2	17	8	"YNL276C"	"YNL276C"	9830	15300	120	276	385	285	90	109	126	56	40	0	626	1091	1020	70	107	276	66	51	0	0.335	0.289	0.293	0.317	1.929	0.272	0.896	120	559	742	1316	-1.580	186	556	295	1021	0
2	18	8	"KRI1"	"YNL308C"	10040	15290	110	1920	2042	1644	91	97	39	92	88	0	1718	2241	2024	69	77	57	83	81	0	1.109	0.898	0.903	1.015	1.924	0.847	0.965	80	523	3478	4123	0.149	1829	1649	1951	2172	0
2	19	8	"YNL246W"	"YNL246W"	10240	15290	130	622	580	343	91	99	44	86	80	0	2727	2619	2045	71	106	214	80	75	0	0.200	0.192	0.196	0.251	2.154	0.173	0.927	120	691	3187	3037	-2.322	531	2656	489	2548	0
2	20	8	"YNL278W"	"YNL278W"	10460	15290	120	984	1147	868	91	96	37	95	90	0	2197	3374	3036	71	111	233	80	73	0	0.420	0.320	0.342	0.431	2.026	0.295	0.942	120	561	3019	4359	-1.251	893	2126	1056	3303	0
2	21	8	"YNL310C"	"YNL310C"	10640	15290	130	858	858	537	93	98	34	94	93	0	1763	2129	1535	71	81	70	95	90	0	0.452	0.372	0.378	0.421	1.795	0.356	0.947	120	664	2457	2823	-1.145	765	1692	765	2058	0
2	1	9	"YOR042W"	"YOR042W"	6650	15560	100	267	370	282	87	91	29	82	76	0	379	735	814	69	93	145	67	52	0	0.581	0.425	0.439	0.537	2.778	0.343	0.818	80	500	490	949	-0.784	180	310	283	666	0
2	2	9	"CDC21"	"YOR074C"	6840	15560	90	197	259	139	89	95	33	86	69	0	446	961	932	74	102	146	69	57	0	0.290	0.192	0.202	0.294	2.298	0.157	0.854	52	394	480	1057	-1.784	108	372	170	887	0
2	3	9	"VAM3"	"YOR106W"	7030	15560	120	1056	1471	1272	88	96	36	99	96	0	1539	2269	2060	70	83	65	95	90	0	0.659	0.629	0.623	0.787	2.112	0.609	0.904	120	659	2437	3582	-0.602	968	1469	1383	2199	0
2	4	9	"YOR044W"	"YOR044W"	7260	15550	130	355	464	331	89	96	37	85	76	0	1009	1563	1356	70	81	60	89	85	0	0.283	0.251	0.240	0.270	2.282	0.238	0.924	120	721	1205	1868	-1.820	266	939	375	1493	0
2	5	9	"YOR076C"	"YOR076C"	7460	15550	100	515	660	545	92	94	26	88	82	0	974	1488	1511	71	96	377	67	55	0	0.468	0.401	0.423	0.521	2.280	0.370	0.950	80	468	1326	1985	-1.094	423	903	568	1417	0
2	6	9	"YOR108W"	"YOR108W"	7630	15540	110	488	754	645	91	94	29	93	88	0	377	831	779	70	91	364	47	40	0	1.293	0.871	0.869	0.961	1.958	0.842	0.922	80	498	704	1424	0.371	397	307	663	761	0
2	7	9	"DBP5"	"YOR046C"	7820	15540	110	1636	2171	1777	94	116	94	95	87	0	1692	2351	2027	73	110	266	80	72	0	0.952	0.912	0.921	1.056	1.805	0.893	0.964	80	548	3161	4355	-0.070	1542	1619	2077	2278	0
2	8	9	"YOR078W"	"YOR078W"	8050	15540	130	1181	1603	1270	91	108	73	94	86	0	1626	2480	2138	71	92	124	88	84	0	0.701	0.628	0.635	0.682	1.596	0.601	0.965	120	741	2645	3921	-0.513	1090	1555	1512	2409	0
2	9	9	"YOR110W"	"YOR110W"	8250	15520	110	476	550	402	91	96	39	81	80	0	1019	1524	1390	69	87	140	80	73	0	0.405	0.315	0.305	0.356	2.264	0.294	0.863	80	428	1335	1914	-1.303	385	950	459	1455	0
2	10	9	"RAT1"	"YOR048C"	8420	15530	150	108	141	93	89	94	33	38	24	0	89	145	154	69	76	50	25	21	0	0.950	0.684	0.691	0.925	2.849	0.589	0.706	156	684	39	128	-0.074	19	20	52	76	-50
2	11	9	"YOR080W"	"YOR080W"	8640	15530	120	754	1303	1278	88	92	27	96	95	0	1368	2610	2736	70	72	32	95	95	0	0.513	0.478	0.490	0.527	1.514	0.468	0.978	120	621	1964	3755	-0.963	666	1298	1215	2540	0
2	12	9	"YOR112W"	"YOR112W"	8870	15530	120	496	1081	1228	90	94	28	95	86	0	824	1782	2177	71	83	64	82	71	0	0.539	0.579	0.619	0.661	1.890	0.561	0.944	120	559	1159	2702	-0.891	406	753	991	1711	0
2	13	9	"PHO85"	"YPL031C"	9060	15520	120	240	437	400	88	93	33	82	70	0	554	1710	1986	70	80	64	90	86	0	0.314	0.213	0.233	0.230	1.928	0.199	0.924	120	578	636	1989	-1.671	152	484	349	1640	0
2	14	9	"YPL063W"	"YPL063W"	9270	15520	120	498	977	948	87	90	25	98	97	0	767	1787	1998	69	70	34	91	90	0	0.589	0.518	0.529	0.611	2.121	0.484	0.968	120	490	1109	2608	-0.764	411	698	890	1718	0
2	15	9	"YPL095C"	"YPL095C"	9450	15510	150	607	1178	1249	90	105	92	75	64	0	797	1859	2209	70	101	184	69	58	0	0.711	0.608	0.601	0.751	2.067	0.572	0.952	156	605	1244	2877	-0.492	517	727	1088	1789	0
2	16	9	"YPL033C"	"YPL033C"	9650	15510	120	932	1581	1446	90	101	52	91	89	0	984	1915	1912	70	86	82	85	84	0	0.921	0.808	0.830	0.918	1.903	0.775	0.955	120	481	1756	3336	-0.118	842	914	1491	1845	0
2	17	9	"VPS28"	"YPL065W"	9830	15500	150	870	1471	1494	90	107	75	87	74	0	1164	2353	2677	70	98	122	80	69	0	0.713	0.605	0.651	0.737	1.901	0.568	0.956	156	688	1874	3664	-0.488	780	1094	1381	2283	0
2	18	9	"MSY1"	"YPL097W"	10040	15500	120	899	1796	1780	95	116	85	90	80	0	1569	3996	4257	71	112	150	81	75	0	0.537	0.433	0.456	0.556	2.002	0.420	0.976	120	565	2302	5626	-0.898	804	1498	1701	3925	0
2	19	9	"YPL035C"	"YPL035C"	10220	15490	130	794	832	582	93	108	55	87	79	0	976	1167	953	71	104	115	78	71	0	0.775	0.674	0.702	0.793	1.900	0.633	0.940	120	584	1606	1835	-0.369	701	905	739	1096	0
2	20	9	"YPL067C"	"YPL067C"	10450	15490	150	175	238	166	92	102	45	62	48	0	422	794	829	73	107	171	61	50	0	0.238	0.202	0.221	0.294	2.681	0.195	0.824	156	838	432	867	-2.072	83	349	146	721	0
2	21	9	"YPL099C"	"YPL099C"	10670	15490	120	277	635	666	90	94	27	83	74	0	495	1699	2051	72	84	72	85	76	0	0.442	0.335	0.344	0.369	2.046	0.323	0.960	120	582	610	2172	-1.178	187	423	545	1627	0
2	1	10	"EGD1"	"YPL037C"	6650	15770	120	330	411	268	85	90	30	85	79	0	978	1086	828	68	85	146	75	67	0	0.269	0.320	0.323	0.368	2.060	0.307	0.894	120	675	1155	1344	-1.893	245	910	326	1018	0
2	2	10	"BTS1"	"YPL069C"	6840	15760	130	3098	3519	2576	92	123	135	92	88	0	2471	2626	1993	72	115	161	87	84	0	1.253	1.342	1.369	1.531	1.727	1.336	0.933	120	672	5405	5981	0.325	3006	2399	3427	2554	0
2	3	10	"YPL101W"	"YPL101W"	7080	15760	130	1381	1797	1404	89	116	127	95	82	0	2524	3670	3133	70	103	179	95	86	0	0.526	0.474	0.487	0.541	1.657	0.459	0.924	120	658	3746	5308	-0.926	1292	2454	1708	3600	0
2	4	10	"RPS23B"	"YPR132W"	7270	15760	120	807	1549	1627	89	92	29	94	90	0	1101	1952	2217	69	73	39	90	88	0	0.696	0.775	0.847	0.884	1.796	0.739	0.924	120	507	1750	3343	-0.523	718	1032	1460	1883	0
2	5	10	"KIM3"	"YPR164W"	7450	15750	130	644	1823	2548	89	94	30	89	84	0	823	2370	3375	71	91	329	66	51	0	0.738	0.754	0.717	0.816	2.170	0.732	0.896	120	615	1307	4033	-0.438	555	752	1734	2299	0
2	6	10	"YPR196W"	"YPR196W"	7670	15750	120	312	598	653	89	93	28	88	80	0	236	445	497	71	90	331	32	19	0	1.352	1.361	1.333	1.382	2.080	1.332	0.939	120	607	388	883	0.435	223	165	509	374	0
2	7	10	"MSS18"	"YPR134W"	7850	15740	120	1033	1322	1004	96	120	92	85	81	0	1630	2223	1892	76	117	169	84	74	0	0.603	0.571	0.598	0.667	1.839	0.542	0.953	120	565	2491	3373	-0.730	937	1554	1226	2147	0
2	8	10	"MRP2"	"YPR166C"	8060	15740	100	663	674	448	94	114	69	83	77	0	1121	1243	967	73	114	133	76	71	0	0.543	0.496	0.486	0.578	1.905	0.461	0.931	80	421	1617	1750	-0.881	569	1048	580	1170	0
2	9	10	"SGE1"	"YPR198W"	8230	15730	150	104	129	76	92	99	41	28	19	0	84	135	134	72	88	83	22	16	0	1.000	0.587	0.673	0.913	3.094	0.386	0.408	156	782	24	100	0.000	12	12	37	63	-50
2	10	10	"YPR136C"	"YPR136C"	8450	15730	110	920	1091	737	90	95	30	98	96	0	1107	1320	938	72	77	37	98	95	0	0.802	0.802	0.792	0.850	1.458	0.786	0.920	80	556	1865	2249	-0.318	830	1035	1001	1248	0
2	11	10	"NUT2"	"YPR168W"	8660	15710	90	199	264	198	90	94	28	75	63	0	376	797	903	76	84	45	80	75	0	0.363	0.241	0.301	0.286	2.309	0.211	0.769	52	349	409	895	-1.461	109	300	174	721	0
2	12	10	"ARR2"	"YPR200C"	8830	15720	150	95	100	34	90	94	30	23	5	0	85	93	43	73	79	52	25	2	0	0.417	0.500	0.679	0.770	3.035	0.201	0.060	156	759	17	30	-1.263	5	12	10	20	-50
2	13	10	"MEP3"	"YPR138C"	9050	15720	120	1466	1909	1498	89	99	55	99	95	0	2633	3782	3216	70	95	139	95	89	0	0.537	0.490	0.502	0.563	1.517	0.473	0.970	120	565	3940	5532	-0.896	1377	2563	1820	3712	0
2	14	10	"YPR170C"	"YPR170C"	9250	15710	150	139	157	74	90	98	50	48	29	0	253	605	604	71	100	130	55	46	0	0.269	0.125	0.148	0.196	2.961	0.127	0.534	156	695	231	601	-1.893	49	182	67	534	0
2	15	10	"YPR202W"	"YPR202W"	9460	15710	140	6977	8832	7173	91	125	232	94	89	0	10710	14582	12267	72	143	443	92	86	0	0.647	0.602	0.605	0.638	1.683	0.589	0.966	156	666	17524	23251	-0.627	6886	10638	8741	14510	0
2	16	10	"IntYBR048W"	"IntYBR048W"	9680	15700	130	346	493	386	90	127	245	50	36	0	678	1090	989	70	141	467	54	40	0	0.421	0.395	0.403	0.446	2.066	0.439	0.905	120	594	864	1423	-1.248	256	608	403	1020	0
2	17	10	"LSR1"	"LSR1"	9850	15700	110	465	740	661	91	99	38	80	77	0	711	1194	1161	71	88	72	75	70	0	0.584	0.578	0.569	0.613	1.777	0.560	0.953	80	504	1014	1772	-0.775	374	640	649	1123	0
2	18	10	"YCLWTy5-1C"	"YCLWTy5-1C"	10080	15700	130	313	465	378	91	97	35	82	74	0	1177	2337	2330	70	82	65	90	86	0	0.201	0.165	0.166	0.197	1.945	0.160	0.950	120	569	1329	2641	-2.318	222	1107	374	2267	0
2	19	10	"IntYCR097W-A2"	"IntYCR097W-A2"	10230	15690	150	125	152	76	91	100	44	43	30	0	120	238	199	71	87	80	49	42	0	0.694	0.365	0.435	0.506	3.196	0.298	0.533	156	731	83	228	-0.527	34	49	61	167	-50
2	20	10	"IntYDL191W"	"IntYDL191W"	10470	15690	90	188	188	72	90	91	23	80	71	0	314	292	159	70	78	88	78	63	0	0.402	0.441	0.398	0.412	2.338	0.411	0.658	52	383	342	320	-1.316	98	244	98	222	0
2	21	10	"CEN4"	"CEN4"	10650	15690	120	395	502	382	91	94	26	83	75	0	149	157	100	70	76	74	50	29	0	3.848	4.724	3.903	3.332	2.551	4.366	0.368	120	635	383	498	1.944	304	79	411	87	0
2	1	11	"YDRWdelta31"	"YDRWdelta31"	6680	15970	90	204	217	106	86	90	27	80	75	0	203	201	133	70	72	84	57	44	0	0.887	1.000	0.729	0.882	2.886	0.879	0.673	52	376	251	262	-0.173	118	133	131	131	0
2	2	11	"YELCtau1"	"YELCtau1"	6860	15960	150	174	343	303	89	110	114	46	40	0	168	515	562	73	97	122	46	44	0	0.895	0.575	0.585	0.644	2.521	0.542	0.836	156	802	180	696	-0.160	85	95	254	442	0
2	3	11	"YER039C-A"	"YER039C-A"	7080	15960	130	252	356	227	88	91	28	90	81	0	1020	1319	1069	72	87	162	81	70	0	0.173	0.215	0.239	0.261	2.230	0.198	0.784	120	574	1112	1515	-2.531	164	948	268	1247	0
2	4	11	"YFLWtau1"	"YFLWtau1"	7260	15960	140	1039	1829	1790	88	98	53	92	86	0	405	871	889	71	89	169	60	50	0	2.847	2.176	2.193	2.414	1.767	2.121	0.920	156	530	1285	2541	1.510	951	334	1741	800	0
2	5	11	"YFRCdelta9"	"YFRCdelta9"	7450	15950	150	175	353	314	90	99	49	61	47	0	199	666	745	73	83	56	65	52	0	0.675	0.444	0.467	0.537	2.477	0.421	0.909	156	730	211	856	-0.568	85	126	263	593	0
2	6	11	"YGLWtau2"	"YGLWtau2"	7680	15950	110	363	360	212	89	94	30	83	76	0	838	718	540	72	79	54	76	73	0	0.358	0.420	0.406	0.474	1.970	0.392	0.875	80	489	1040	917	-1.483	274	766	271	646	0
2	7	11	"iYAR061W"	"iYAR061W"	7850	15940	150	281	542	484	93	109	61	75	60	0	339	1066	1131	75	103	113	66	51	0	0.712	0.453	0.488	0.574	2.142	0.430	0.948	156	734	452	1440	-0.490	188	264	449	991	0
2	8	11	"iYAR068W"	"iYAR068W"	8060	15930	110	869	929	682	94	109	58	85	77	0	1970	1933	1618	74	114	131	80	70	0	0.409	0.449	0.465	0.513	1.463	0.438	0.956	80	550	2671	2694	-1.291	775	1896	835	1859	0
2	9	11	"iYBL111C"	"iYBL111C"	8280	15940	130	2250	5226	5829	95	107	52	98	95	0	3533	8822	10176	74	101	117	95	93	0	0.623	0.587	0.604	0.705	1.833	0.575	0.980	120	639	5614	13879	-0.683	2155	3459	5131	8748	0
2	10	11	"iYBL098W"	"iYBL098W"	8460	15940	120	475	570	409	91	98	40	83	75	0	919	1002	839	71	78	65	73	69	0	0.453	0.515	0.541	0.650	2.023	0.490	0.936	120	565	1232	1410	-1.143	384	848	479	931	0
2	11	11	"iYBL092W"	"iYBL092W"	8660	15920	100	742	803	581	88	93	28	83	82	0	1079	1145	912	72	78	38	80	78	0	0.649	0.666	0.669	0.695	1.566	0.644	0.960	80	501	1661	1788	-0.623	654	1007	715	1073	0
2	12	11	"iYBL089W"	"iYBL089W"	8850	15910	110	1093	1125	825	94	103	48	90	86	0	1766	1969	1579	74	90	74	90	82	0	0.590	0.544	0.561	0.603	1.613	0.526	0.969	80	537	2691	2926	-0.760	999	1692	1031	1895	0
2	13	11	"iYBL071C"	"iYBL071C"	9070	15900	90	449	413	260	94	98	32	82	75	0	1094	920	721	75	92	72	75	71	0	0.348	0.378	0.408	0.436	1.556	0.370	0.920	52	397	1374	1164	-1.521	355	1019	319	845	0
2	14	11	"iYBL065W"	"iYBL065W"	9270	15910	110	136	144	55	90	95	29	60	47	0	313	372	273	74	85	63	68	60	0	0.192	0.181	0.185	0.201	2.203	0.175	0.566	80	521	285	352	-2.377	46	239	54	298	0
2	15	11	"iYBL060W"	"iYBL060W"	9460	15910	120	317	454	342	85	100	112	65	50	0	641	891	822	71	95	280	60	50	0	0.407	0.450	0.495	0.523	2.228	0.420	0.936	120	589	802	1189	-1.297	232	570	369	820	0
2	16	11	"iYBL042C"	"iYBL042C"	9660	15900	110	535	540	339	89	93	30	90	83	0	1527	1651	1265	70	82	65	88	83	0	0.306	0.285	0.283	0.344	1.986	0.271	0.946	80	555	1903	2032	-1.708	446	1457	451	1581	0
2	17	11	"iYBL038W"	"iYBL038W"	9890	15910	120	371	464	300	90	95	28	95	88	0	780	1302	1095	72	83	59	94	93	0	0.397	0.304	0.300	0.343	1.802	0.270	0.877	120	628	989	1604	-1.333	281	708	374	1230	0
2	18	11	"iYBL034C"	"iYBL034C"	10070	15900	120	272	378	282	88	91	25	80	73	0	548	853	789	69	75	47	79	71	0	0.384	0.370	0.357	0.380	2.107	0.356	0.936	120	523	663	1074	-1.380	184	479	290	784	0
2	19	11	"iYBR265W"	"iYBR265W"	10270	15890	120	400	512	373	89	94	39	84	73	0	684	950	817	70	80	57	76	72	0	0.507	0.481	0.469	0.528	1.805	0.460	0.948	120	557	925	1303	-0.981	311	614	423	880	0
2	20	11	"iYBR270C"	"iYBR270C"	10460	15890	110	195	439	398	93	96	28	76	68	0	468	1468	1625	72	85	62	81	68	0	0.258	0.248	0.263	0.317	2.235	0.243	0.957	80	557	498	1742	-1.957	102	396	346	1396	0
2	21	11	"iYBR274W"	"iYBR274W"	10690	15880	110	384	584	470	93	102	40	82	73	0	361	560	516	74	86	65	67	58	0	1.014	1.010	0.941	1.000	2.206	0.933	0.913	80	525	578	977	0.020	291	287	491	486	0
2	1	12	"iYBR291C"	"iYBR291C"	6700	16150	90	166	169	62	86	92	29	75	63	0	804	687	475	73	100	127	71	67	0	0.109	0.135	0.153	0.166	3.136	0.108	0.612	52	402	811	697	-3.192	80	731	83	614	0
2	2	12	"iYBR294W"	"iYBR294W"	6880	16160	110	340	365	217	86	91	27	90	83	0	1527	1437	1004	73	81	41	96	92	0	0.175	0.205	0.209	0.209	2.035	0.197	0.873	80	517	1708	1643	-2.517	254	1454	279	1364	0
2	3	12	"iYBR297W"	"iYBR297W"	7100	16160	120	704	1088	981	87	91	26	96	95	0	453	709	674	72	80	71	75	64	0	1.619	1.571	1.602	1.964	2.054	1.519	0.934	120	567	998	1638	0.695	617	381	1001	637	0
2	4	12	"iYCL061C"	"iYCL061C"	7290	16150	140	338	1151	1527	89	98	48	72	64	0	425	1930	2828	72	82	74	71	61	0	0.705	0.572	0.596	0.667	2.441	0.539	0.945	156	608	602	2920	-0.504	249	353	1062	1858	0
2	5	12	"iYCL055W-0"	"iYCL055W-0"	7480	16160	110	392	464	311	89	93	28	92	91	0	447	601	451	72	75	37	93	90	0	0.808	0.709	0.693	0.771	1.963	0.689	0.921	80	457	678	904	-0.308	303	375	375	529	0
2	6	12	"iYCL051W"	"iYCL051W"	7660	16150	110	1317	1329	844	91	94	28	100	97	0	1056	1108	732	73	72	23	96	95	0	1.247	1.196	1.200	1.344	1.924	1.170	0.942	80	521	2209	2273	0.319	1226	983	1238	1035	0
2	7	12	"iYCL029C"	"iYCL029C"	7860	16140	120	1076	1344	1031	90	101	55	90	87	0	953	1155	963	74	83	60	85	80	0	1.122	1.160	1.171	1.378	2.150	1.114	0.932	120	547	1865	2335	0.166	986	879	1254	1081	0
2	8	12	"iYCL025C"	"iYCL025C"	8050	16140	120	798	731	431	94	105	58	89	82	0	1268	1143	791	73	89	72	81	78	0	0.589	0.595	0.594	0.790	2.440	0.571	0.917	120	650	1899	1707	-0.763	704	1195	637	1070	0
2	9	12	"iYCRCdelta6-0"	"iYCRCdelta6-0"	8270	16120	90	487	581	429	94	106	49	82	71	0	719	855	704	76	89	66	76	71	0	0.611	0.625	0.660	0.814	2.594	0.610	0.904	52	366	1036	1266	-0.710	393	643	487	779	0
2	10	12	"iYDL043C"	"iYDL043C"	8450	16130	120	1208	1669	1384	90	103	63	87	85	0	486	678	573	72	87	109	67	59	0	2.700	2.606	2.619	2.849	2.203	2.617	0.913	120	639	1532	2185	1.433	1118	414	1579	606	0
2	11	12	"iYDL037C-0"	"iYDL037C-0"	8670	16110	90	329	324	171	90	97	40	80	71	0	1969	1661	1207	72	112	185	76	75	0	0.126	0.147	0.135	0.171	3.028	0.139	0.832	52	400	2136	1823	-2.989	239	1897	234	1589	0
2	12	12	"iYDL032W"	"iYDL032W"	8860	16120	120	255	268	128	88	96	40	83	71	0	721	836	645	71	91	103	80	69	0	0.257	0.235	0.228	0.305	2.919	0.197	0.770	120	610	817	945	-1.961	167	650	180	765	0
2	13	12	"iYDL014W"	"iYDL014W"	9060	16120	120	1151	1432	1109	90	96	31	93	90	0	1054	1511	1343	70	81	58	80	75	0	1.078	0.931	0.936	1.159	2.229	0.869	0.929	120	595	2045	2783	0.109	1061	984	1342	1441	0
2	14	12	"iYDL008W"	"iYDL008W"	9250	16120	120	448	571	400	91	106	75	84	74	0	462	624	523	71	96	139	68	55	0	0.913	0.868	0.894	0.984	2.000	0.800	0.909	120	648	748	1033	-0.131	357	391	480	553	0
2	15	12	"iYDLWtau1"	"iYDLWtau1"	9490	16110	110	270	351	226	89	110	94	67	48	0	539	646	508	69	103	176	75	55	0	0.385	0.454	0.455	0.450	2.458	0.452	0.886	80	494	651	839	-1.377	181	470	262	577	0
2	16	12	"iYDR008C"	"iYDR008C"	9650	16110	130	953	1114	819	89	94	32	96	94	0	1922	1838	1415	68	77	60	87	85	0	0.466	0.579	0.583	0.696	2.291	0.572	0.940	120	620	2718	2795	-1.102	864	1854	1025	1770	0
2	17	12	"iYDR013W"	"iYDR013W"	9850	16100	100	368	392	259	90	97	34	76	72	0	477	605	508	71	82	58	70	68	0	0.685	0.566	0.587	0.606	2.204	0.509	0.852	80	464	684	836	-0.546	278	406	302	534	0
2	18	12	"iYDR016C"	"iYDR016C"	10070	16100	130	524	1157	1120	91	97	33	93	89	0	635	1470	1568	72	83	68	78	71	0	0.769	0.763	0.809	0.956	2.454	0.726	0.941	120	612	996	2464	-0.379	433	563	1066	1398	0
2	19	12	"iYDR032C-0"	"iYDR032C-0"	10240	16090	130	1877	1833	1340	90	105	69	95	86	0	917	1208	971	72	87	68	89	81	0	2.115	1.534	1.535	1.738	1.814	1.453	0.933	120	602	2632	2879	1.081	1787	845	1743	1136	0
2	20	12	"iYDR034C"	"iYDR034C"	10470	16090	130	1051	1011	668	96	127	166	80	68	0	2963	2589	1913	74	113	171	85	76	0	0.331	0.364	0.367	0.399	1.794	0.353	0.885	120	702	3844	3430	-1.597	955	2889	915	2515	0
2	21	12	"iYDR034C-A"	"iYDR034C-A"	10680	16090	130	578	1321	1299	92	116	158	87	66	0	899	2193	2332	71	101	166	83	75	0	0.587	0.579	0.585	0.704	2.092	0.566	0.938	120	701	1314	3351	-0.769	486	828	1229	2122	0
2	1	13	"iYDR335W"	"iYDR335W"	6710	16360	110	382	779	777	85	88	28	87	85	0	426	1053	1183	70	76	52	72	66	0	0.834	0.706	0.737	0.953	2.101	0.668	0.953	80	470	653	1677	-0.261	297	356	694	983	0
2	2	13	"iYDR339C"	"iYDR339C"	6840	16360	150	96	121	72	86	91	29	33	19	0	78	142	153	73	83	59	23	19	0	2.000	0.507	0.680	0.790	3.979	0.391	0.519	156	789	15	104	1.000	10	5	35	69	-50
2	3	13	"iYDR342C-1"	"iYDR342C-1"	7060	16360	120	202	208	104	85	89	24	78	70	0	250	287	197	71	71	33	75	68	0	0.654	0.569	0.527	0.584	2.383	0.508	0.736	120	611	296	339	-0.613	117	179	123	216	0
2	4	13	"iYDR354W"	"iYDR354W"	7270	16350	110	372	549	432	90	95	30	80	76	0	425	698	636	72	77	36	67	67	0	0.799	0.733	0.690	0.723	2.098	0.701	0.930	80	543	635	1085	-0.324	282	353	459	626	0
2	5	13	"iYDR360W"	"iYDR360W"	7470	16330	110	200	239	147	92	96	32	71	61	0	770	1462	1403	74	91	67	82	77	0	0.155	0.106	0.107	0.146	2.510	0.100	0.802	80	551	804	1535	-2.688	108	696	147	1388	0
2	6	13	"itK(CUU)D1"	"itK(CUU)D1"	7690	16350	120	146	230	190	89	91	27	64	50	0	257	640	810	74	84	60	70	63	0	0.311	0.249	0.263	0.300	2.733	0.225	0.868	120	554	240	707	-1.683	57	183	141	566	0
2	7	13	"iYDR379W"	"iYDR379W"	7870	16340	130	807	1155	936	87	98	51	90	86	0	1336	2122	1865	74	89	78	86	81	0	0.571	0.521	0.527	0.607	1.825	0.506	0.964	120	603	1982	3116	-0.810	720	1262	1068	2048	0
2	8	13	"iYDR383C"	"iYDR383C"	8080	16340	110	236	388	320	91	97	40	77	62	0	432	831	875	73	89	79	68	62	0	0.404	0.392	0.387	0.433	2.271	0.366	0.924	80	502	504	1055	-1.308	145	359	297	758	0
2	9	13	"iYDR387C"	"iYDR387C"	8270	16330	140	193	380	385	91	98	39	75	57	0	359	888	1137	73	89	72	69	60	0	0.357	0.355	0.391	0.483	2.606	0.336	0.943	156	796	388	1104	-1.487	102	286	289	815	0
2	10	13	"iYDR404C"	"iYDR404C"	8500	16340	110	347	659	614	88	93	34	86	72	0	438	1393	1553	71	79	52	78	75	0	0.706	0.432	0.443	0.523	3.077	0.406	0.953	80	545	626	1893	-0.503	259	367	571	1322	0
2	11	13	"iYDR408C"	"iYDR408C"	8700	16320	130	160	362	377	89	93	31	63	51	0	316	1182	1606	69	90	128	60	49	0	0.287	0.245	0.261	0.274	2.320	0.232	0.934	120	643	318	1386	-1.799	71	247	273	1113	0
2	12	13	"iYDR413C"	"iYDR413C"	8890	16320	130	176	301	266	89	93	26	71	60	0	219	536	618	71	82	65	66	53	0	0.588	0.456	0.516	0.514	2.647	0.411	0.833	120	582	235	677	-0.767	87	148	212	465	0
2	13	13	"itS(UGA)E-0"	"itS(UGA)E-0"	9070	16320	120	1532	2336	2287	92	101	49	95	91	0	948	1542	1569	72	86	74	83	79	0	1.644	1.527	1.541	1.628	1.936	1.493	0.966	120	570	2316	3714	0.717	1440	876	2244	1470	0
2	14	13	"iYER068W"	"iYER068W"	9290	16310	110	273	357	231	91	99	49	76	65	0	830	1180	971	72	102	265	67	58	0	0.240	0.240	0.240	0.252	2.124	0.227	0.871	80	475	940	1374	-2.058	182	758	266	1108	0
2	15	13	"iYER072W"	"iYER072W"	9460	16310	120	153	217	147	90	95	39	61	45	0	302	759	844	69	92	249	45	35	0	0.270	0.184	0.205	0.225	2.612	0.167	0.833	120	532	296	817	-1.887	63	233	127	690	0
2	16	13	"iYER087W"	"iYER087W"	9650	16300	130	509	630	440	90	96	34	89	84	0	1141	1358	1113	69	94	167	78	70	0	0.391	0.419	0.422	0.459	1.832	0.390	0.904	120	592	1491	1829	-1.355	419	1072	540	1289	0
2	17	13	"iYER090W"	"iYER090W"	9870	16300	150	353	394	253	92	99	37	81	67	0	668	771	626	72	102	150	66	61	0	0.438	0.432	0.455	0.503	2.289	0.390	0.865	156	791	857	1001	-1.191	261	596	302	699	0
2	18	13	"iYER093C"	"iYER093C"	10090	16300	130	213	269	175	90	94	27	77	66	0	596	850	723	72	75	46	85	81	0	0.235	0.230	0.249	0.247	2.485	0.224	0.850	120	588	647	957	-2.091	123	524	179	778	0
2	19	13	"iYER106W"	"iYER106W"	10280	16290	130	806	1056	918	90	101	53	88	78	0	789	1255	1174	72	81	54	79	75	0	0.999	0.817	0.810	0.883	2.138	0.793	0.950	120	612	1433	2149	-0.002	716	717	966	1183	0
2	20	13	"iYER110C"	"iYER110C"	10470	16280	100	621	672	510	95	100	35	86	75	0	1054	1200	1062	74	90	109	73	65	0	0.537	0.512	0.538	0.521	1.754	0.481	0.932	80	469	1506	1703	-0.898	526	980	577	1126	0
2	21	13	"iYER114C"	"iYER114C"	10690	16290	120	323	614	567	93	95	26	90	86	0	429	941	967	71	77	71	84	71	0	0.642	0.599	0.607	0.661	1.998	0.581	0.927	120	604	588	1391	-0.638	230	358	521	870	0
2	1	14	"iYER131W"	"iYER131W"	6670	16560	130	490	520	326	87	90	28	92	86	0	1331	1484	1151	71	75	37	95	89	0	0.320	0.306	0.315	0.364	2.119	0.279	0.895	120	752	1663	1846	-1.645	403	1260	433	1413	0
2	2	14	"iYERCdelta14"	"iYERCdelta14"	6870	16560	110	404	393	186	86	92	29	96	87	0	1360	1236	781	74	84	51	93	88	0	0.247	0.264	0.271	0.302	2.106	0.241	0.857	80	517	1604	1469	-2.016	318	1286	307	1162	0
2	3	14	"itK(CUU)E2"	"itK(CUU)E2"	7080	16560	130	150	241	193	87	91	28	65	51	0	132	411	469	74	82	44	56	45	0	1.086	0.457	0.526	0.634	3.444	0.405	0.850	120	699	121	491	0.119	63	58	154	337	0
2	4	14	"iYGL186C"	"iYGL186C"	7310	16560	120	222	419	355	89	94	35	79	68	0	432	1090	1110	73	81	47	91	87	0	0.370	0.324	0.336	0.329	1.845	0.312	0.921	120	574	492	1347	-1.433	133	359	330	1017	0
2	5	14	"iYGL182C"	"iYGL182C"	7480	16550	130	473	593	429	90	94	30	90	83	0	1309	1783	1472	74	89	73	88	85	0	0.310	0.294	0.298	0.326	2.032	0.284	0.922	120	579	1618	2212	-1.689	383	1235	503	1709	0
2	6	14	"iYGL179C-1"	"iYGL179C-1"	7670	16540	140	134	220	185	89	92	28	57	45	0	137	457	593	75	89	69	49	38	0	0.726	0.343	0.376	0.461	2.901	0.304	0.862	156	652	107	513	-0.462	45	62	131	382	0
2	7	14	"iYGL163C-1"	"iYGL163C-1"	7860	16530	120	332	441	354	88	94	33	80	65	0	1275	1899	1902	75	90	63	87	80	0	0.203	0.194	0.206	0.229	2.235	0.183	0.933	120	578	1444	2177	-2.298	244	1200	353	1824	0
2	8	14	"iYGL159W"	"iYGL159W"	8100	16530	110	404	698	608	91	95	27	91	85	0	851	1256	1233	73	87	61	80	76	0	0.402	0.513	0.537	0.558	2.111	0.492	0.943	80	494	1091	1790	-1.314	313	778	607	1183	0
2	9	14	"iYGL157W"	"iYGL157W"	8260	16530	120	331	482	392	91	98	35	83	72	0	624	1233	1218	73	95	83	80	74	0	0.436	0.337	0.359	0.352	1.908	0.313	0.912	120	577	791	1551	-1.199	240	551	391	1160	0
2	10	14	"iYGL139W"	"iYGL139W"	8510	16520	100	260	305	185	90	93	27	83	75	0	1127	1288	1034	73	87	62	80	78	0	0.161	0.177	0.190	0.234	3.021	0.166	0.829	80	479	1224	1430	-2.632	170	1054	215	1215	0
2	11	14	"iYGL135W"	"iYGL135W"	8710	16520	140	588	1084	1084	91	95	29	90	85	0	520	1075	1164	71	80	48	83	79	0	1.107	0.989	0.984	1.042	2.195	0.951	0.908	156	703	946	1997	0.147	497	449	993	1004	0
2	12	14	"iYGL130W"	"iYGL130W"	8890	16520	110	363	532	361	90	95	30	88	83	0	1267	1515	1188	71	85	62	90	78	0	0.228	0.306	0.307	0.344	2.203	0.290	0.893	80	480	1469	1886	-2.131	273	1196	442	1444	0
2	13	14	"iYGL114W"	"iYGL114W"	9100	16520	120	253	291	177	90	95	31	80	70	0	507	820	712	70	80	56	80	74	0	0.373	0.268	0.269	0.330	2.451	0.244	0.850	120	502	600	951	-1.423	163	437	201	750	0
2	14	14	"iYGL110C"	"iYGL110C"	9250	16510	150	100	110	46	92	97	41	18	8	0	79	131	150	73	92	218	12	1	0	1.333	0.310	0.516	0.571	3.582	0.033	0.052	156	703	14	76	0.415	8	6	18	58	-50
2	15	14	"iYGL105W"	"iYGL105W"	9490	16500	120	221	355	284	92	95	28	73	61	0	399	844	875	73	95	255	52	40	0	0.396	0.341	0.358	0.391	2.456	0.319	0.877	120	629	455	1034	-1.338	129	326	263	771	0
2	16	14	"iYGR177C"	"iYGR177C"	9700	16500	120	407	665	546	91	96	32	88	82	0	495	976	966	72	97	182	63	53	0	0.747	0.635	0.633	0.748	1.880	0.551	0.853	120	489	739	1478	-0.421	316	423	574	904	0
2	17	14	"itL(CAA)G3"	"itL(CAA)G3"	9850	16500	130	544	648	469	92	101	38	87	83	0	1122	1546	1428	74	113	177	79	63	0	0.431	0.378	0.394	0.437	1.812	0.331	0.895	120	558	1500	2028	-1.213	452	1048	556	1472	0
2	18	14	"iYGR185C"	"iYGR185C"	10090	16500	140	181	328	305	93	100	36	67	57	0	200	566	715	74	104	157	46	32	0	0.698	0.478	0.576	0.704	2.826	0.410	0.819	156	736	214	727	-0.518	88	126	235	492	0
2	19	14	"iYGR199W"	"iYGR199W"	10290	16490	120	518	680	549	90	97	38	87	80	0	435	636	592	72	82	68	72	61	0	1.179	1.046	1.052	1.098	2.372	0.971	0.895	120	555	791	1154	0.238	428	363	590	564	0
2	20	14	"iYGR203W"	"iYGR203W"	10490	16490	120	252	275	161	93	99	36	80	69	0	440	559	441	73	84	54	81	74	0	0.433	0.374	0.396	0.417	2.334	0.352	0.831	120	561	526	668	-1.207	159	367	182	486	0
2	21	14	"iYGR207C"	"iYGR207C"	10670	16490	120	181	244	159	91	95	28	75	59	0	244	487	449	72	91	266	42	37	0	0.523	0.369	0.395	0.455	2.570	0.333	0.793	120	583	262	568	-0.934	90	172	153	415	0
2	1	15	"iYGR221C"	"iYGR221C"	6700	16770	120	273	369	282	85	88	25	85	78	0	600	1206	1260	70	71	28	88	85	0	0.355	0.250	0.271	0.351	2.611	0.217	0.849	120	623	718	1420	-1.495	188	530	284	1136	0
2	2	15	"iYGR224W"	"iYGR224W"	6910	16760	120	262	336	211	88	91	27	83	79	0	831	1344	1172	73	85	74	85	81	0	0.230	0.195	0.221	0.227	2.062	0.174	0.841	120	589	932	1519	-2.123	174	758	248	1271	0
2	3	15	"iYGR230W"	"iYGR230W"	7090	16750	110	275	370	274	91	95	32	78	75	0	852	1163	1057	74	92	66	75	73	0	0.237	0.256	0.283	0.333	2.393	0.242	0.845	80	472	962	1368	-2.080	184	778	279	1089	0
2	4	15	"iYGR247W"	"iYGR247W"	7290	16750	120	645	756	539	90	101	52	85	80	0	733	958	785	72	90	72	78	71	0	0.840	0.752	0.782	0.831	1.920	0.704	0.918	120	563	1216	1552	-0.252	555	661	666	886	0
2	5	15	"iYGR250C-0"	"iYGR250C-0"	7500	16750	120	329	523	427	91	100	48	85	76	0	879	1917	2072	74	91	72	90	87	0	0.296	0.234	0.264	0.287	2.129	0.207	0.893	120	593	1043	2275	-1.758	238	805	432	1843	0
2	6	15	"iYGR253C-0"	"iYGR253C-0"	7700	16740	110	367	434	295	89	92	29	88	85	0	859	1320	1202	76	84	42	85	83	0	0.355	0.277	0.302	0.371	2.089	0.249	0.890	80	498	1061	1589	-1.494	278	783	345	1244	0
2	7	15	"iYHR186C"	"iYHR186C"	7880	16740	130	1540	1788	1300	91	109	72	95	89	0	2613	3002	2475	76	118	159	88	81	0	0.571	0.580	0.597	0.685	1.641	0.542	0.946	120	621	3986	4623	-0.808	1449	2537	1697	2926	0
2	8	15	"iYHR191C"	"iYHR191C"	8090	16730	130	377	476	315	94	109	69	82	71	0	864	1268	1053	74	118	162	80	70	0	0.358	0.320	0.331	0.347	1.813	0.304	0.900	120	685	1073	1576	-1.481	283	790	382	1194	0
2	9	15	"iYHR196W"	"iYHR196W"	8300	16730	120	202	288	195	90	97	35	75	65	0	387	577	508	72	96	102	65	58	0	0.356	0.392	0.397	0.416	1.893	0.365	0.866	120	537	427	703	-1.492	112	315	198	505	0
2	10	15	"iYHRCdelta16-0"	"iYHRCdelta16-0"	8490	16730	120	1600	2618	2341	90	102	52	97	92	0	2988	4823	4683	72	101	116	91	89	0	0.518	0.532	0.539	0.619	1.634	0.509	0.966	120	545	4426	7279	-0.949	1510	2916	2528	4751	0
2	11	15	"iYIL174W-1"	"iYIL174W-1"	8690	16730	130	491	931	1027	91	102	51	90	82	0	823	1902	2413	71	99	112	81	73	0	0.532	0.459	0.462	0.571	2.137	0.429	0.956	120	611	1152	2671	-0.911	400	752	840	1831	0
2	12	15	"iYIL170W-1"	"iYIL170W-1"	8900	16720	130	397	652	687	89	94	29	90	81	0	662	1274	1579	70	77	50	86	82	0	0.520	0.468	0.502	0.542	2.484	0.430	0.902	120	687	900	1767	-0.943	308	592	563	1204	0
2	13	15	"iYIL153W"	"iYIL153W"	9110	16720	120	319	385	244	91	94	26	91	85	0	478	662	544	72	78	42	80	75	0	0.562	0.498	0.511	0.575	2.436	0.455	0.889	120	521	634	884	-0.832	228	406	294	590	0
2	14	15	"iYIL149C"	"iYIL149C"	9290	16720	140	231	410	423	90	93	27	82	70	0	287	714	948	73	77	38	83	75	0	0.659	0.499	0.528	0.590	2.370	0.452	0.938	156	610	355	961	-0.602	141	214	320	641	0
2	15	15	"iYIL145C"	"iYIL145C"	9500	16710	110	471	699	540	95	102	48	88	77	0	1394	2018	1854	75	103	125	83	78	0	0.285	0.311	0.303	0.334	1.942	0.293	0.950	80	506	1695	2547	-1.811	376	1319	604	1943	0
2	16	15	"iYIL129C"	"iYIL129C"	9700	16700	150	160	275	234	91	97	41	58	45	0	405	1330	1709	72	95	110	66	55	0	0.207	0.146	0.170	0.208	2.654	0.136	0.893	156	713	402	1442	-2.271	69	333	184	1258	0
2	17	15	"iYIL125W"	"iYIL125W"	9900	16690	110	331	354	232	91	95	30	77	68	0	834	877	708	74	85	65	72	71	0	0.316	0.328	0.325	0.337	1.705	0.314	0.912	80	487	1000	1066	-1.663	240	760	263	803	0
2	18	15	"iYIL121W"	"iYIL121W"	10090	16700	120	333	478	368	92	97	30	94	89	0	665	989	921	73	87	139	79	69	0	0.407	0.421	0.445	0.514	2.066	0.384	0.896	120	549	833	1302	-1.297	241	592	386	916	0
2	19	15	"itR(ACG)J"	"itR(ACG)J"	10290	16700	130	460	538	385	90	96	33	87	83	0	712	1013	854	72	96	205	73	58	0	0.578	0.476	0.455	0.482	2.060	0.452	0.919	120	647	1010	1389	-0.791	370	640	448	941	0
2	20	15	"iYJL098W"	"iYJL098W"	10510	16690	120	148	186	106	91	96	32	64	46	0	292	479	424	73	86	149	65	40	0	0.260	0.234	0.240	0.251	2.250	0.235	0.795	120	585	276	501	-1.942	57	219	95	406	0
2	21	15	"iYJL093C"	"iYJL093C"	10710	16690	120	182	264	232	88	92	26	77	62	0	439	1099	1498	70	89	278	54	39	0	0.255	0.171	0.187	0.221	2.376	0.142	0.852	120	569	463	1205	-1.973	94	369	176	1029	0
2	1	16	"iYJL074C"	"iYJL074C"	6710	16960	140	453	931	1061	85	88	27	90	87	0	469	1087	1371	71	73	57	80	73	0	0.925	0.833	0.923	1.069	2.594	0.783	0.931	156	733	766	1862	-0.113	368	398	846	1016	0
2	2	16	"iYJL070C"	"iYJL070C"	6910	16960	120	214	270	183	89	91	29	72	62	0	425	722	648	73	79	69	75	69	0	0.355	0.279	0.294	0.301	1.953	0.267	0.867	120	512	477	830	-1.494	125	352	181	649	0
2	3	16	"iYJL064W"	"iYJL064W"	7090	16950	120	184	244	153	90	93	30	72	61	0	360	644	597	74	82	49	76	72	0	0.329	0.270	0.304	0.323	2.352	0.247	0.827	120	572	380	724	-1.605	94	286	154	570	0
2	4	16	"iSNR60"	"iSNR60"	7310	16950	150	139	179	109	89	98	43	51	39	0	418	905	1003	73	94	104	67	58	0	0.145	0.108	0.115	0.146	2.765	0.095	0.683	156	687	395	922	-2.787	50	345	90	832	0
2	5	16	"iYJLCdelta5"	"iYJLCdelta5"	7510	16950	130	489	578	415	88	90	24	89	82	0	673	878	716	72	75	36	81	78	0	0.667	0.608	0.615	0.653	1.814	0.540	0.795	120	514	1002	1296	-0.584	401	601	490	806	0
2	6	16	"iYJL043W"	"iYJL043W"	7670	16950	110	574	691	448	91	95	38	96	92	0	672	793	568	76	83	52	92	88	0	0.810	0.837	0.817	0.860	1.401	0.792	0.921	80	468	1079	1317	-0.303	483	596	600	717	0
2	7	16	"iYJL029C"	"iYJL029C"	7880	16940	150	144	170	82	92	107	65	45	23	0	299	443	388	76	121	161	51	46	0	0.233	0.213	0.238	0.280	2.981	0.191	0.577	156	729	275	445	-2.100	52	223	78	367	0
2	8	16	"iYJL026W"	"iYJL026W"	8080	16930	110	277	309	172	91	95	28	86	77	0	552	601	438	74	89	80	78	76	0	0.389	0.414	0.390	0.477	2.310	0.365	0.825	80	522	664	745	-1.362	186	478	218	527	0
2	9	16	"iYJL022W"	"iYJL022W"	8290	16930	130	1298	1761	1478	90	95	40	95	93	0	1388	1694	1468	75	86	71	80	79	0	0.920	1.032	1.024	1.273	2.403	1.020	0.947	120	508	2521	3290	-0.120	1208	1313	1671	1619	0
2	10	16	"iYKL121W"	"iYKL121W"	8420	16930	140	378	532	435	90	95	40	81	69	0	688	1651	1689	72	84	82	80	72	0	0.468	0.280	0.306	0.374	2.233	0.246	0.916	156	523	904	2021	-1.097	288	616	442	1579	0
2	11	16	"iYKL117W"	"iYKL117W"	8610	16930	140	835	1222	995	92	102	54	93	91	0	856	1227	1034	74	102	128	80	69	0	0.950	0.980	1.054	1.159	1.961	0.969	0.932	156	615	1525	2283	-0.074	743	782	1130	1153	0
2	12	16	"iYKL111C"	"iYKL111C"	8800	16930	110	734	635	371	88	93	31	87	83	0	932	814	516	71	73	38	82	81	0	0.750	0.736	0.735	0.756	1.522	0.723	0.915	80	509	1507	1290	-0.414	646	861	547	743	0
2	13	16	"iYKL097W-A-0"	"iYKL097W-A-0"	9010	16920	120	386	433	250	92	96	32	90	84	0	845	1067	813	74	78	35	92	91	0	0.381	0.343	0.336	0.391	2.275	0.310	0.874	120	595	1065	1334	-1.391	294	771	341	993	0
2	14	16	"iYKL094W"	"iYKL094W"	9210	16930	130	788	799	491	90	94	46	94	89	0	1310	1288	901	71	79	66	88	83	0	0.563	0.583	0.601	0.682	1.910	0.552	0.899	120	532	1937	1926	-0.828	698	1239	709	1217	0
2	15	16	"iYKL090W"	"iYKL090W"	9400	16900	140	225	310	215	90	95	48	67	57	0	334	635	571	70	78	70	73	59	0	0.511	0.389	0.391	0.434	2.380	0.367	0.825	156	610	399	785	-0.968	135	264	220	565	0
2	16	16	"iYKL072W"	"iYKL072W"	9600	16910	120	233	339	243	88	107	132	52	35	0	260	387	341	71	102	201	48	31	0	0.767	0.794	0.794	0.785	2.220	0.725	0.836	120	576	334	567	-0.382	145	189	251	316	0
2	17	16	"iYKL071W"	"iYKL071W"	9820	16900	150	384	515	379	88	106	133	64	53	0	826	1169	992	72	109	316	63	53	0	0.393	0.389	0.396	0.418	2.148	0.373	0.911	156	690	1050	1524	-1.349	296	754	427	1097	0
2	18	16	"itV(AAC)K1-1"	"itV(AAC)K1-1"	10000	16900	150	764	711	392	91	100	59	91	89	0	1500	1427	854	72	89	134	89	85	0	0.471	0.458	0.453	0.486	1.689	0.437	0.898	156	715	2101	1975	-1.085	673	1428	620	1355	0
2	19	16	"iYKL056C"	"iYKL056C"	10220	16890	110	277	270	126	88	91	26	87	83	0	643	742	517	71	83	94	83	75	0	0.330	0.271	0.265	0.298	2.208	0.215	0.693	80	521	761	853	-1.598	189	572	182	671	0
2	20	16	"iYKL052C"	"iYKL052C"	10420	16890	120	397	524	367	90	96	34	90	81	0	1563	2077	1713	74	93	170	88	79	0	0.206	0.217	0.226	0.243	1.995	0.206	0.913	120	580	1796	2437	-2.278	307	1489	434	2003	0
2	21	16	"iYKL048C"	"iYKL048C"	10620	16890	120	393	603	443	92	96	35	91	89	0	771	1210	1044	73	78	46	90	83	0	0.431	0.449	0.483	0.542	2.173	0.425	0.901	120	623	999	1648	-1.213	301	698	511	1137	0
2	1	17	"iYLR069C"	"iYLR069C"	6620	17160	150	708	740	499	86	90	26	93	91	0	1134	1225	918	71	72	45	89	86	0	0.585	0.567	0.562	0.650	1.945	0.546	0.935	156	815	1685	1808	-0.773	622	1063	654	1154	0
2	2	17	"iYLR073C"	"iYLR073C"	6830	17160	120	1415	1379	814	88	91	27	99	97	0	1353	1225	791	72	74	30	91	90	0	1.036	1.120	1.141	1.322	2.112	1.087	0.931	120	546	2608	2444	0.051	1327	1281	1291	1153	0
2	3	17	"iYLR078C"	"iYLR078C"	7030	17160	130	316	447	327	87	93	48	85	74	0	692	1386	1300	72	77	49	84	79	0	0.369	0.274	0.292	0.359	2.398	0.253	0.905	120	592	849	1674	-1.437	229	620	360	1314	0
2	4	17	"iYLR094C"	"iYLR094C"	7220	17150	130	391	464	273	90	95	30	93	90	0	1957	2314	1662	72	94	117	95	93	0	0.160	0.167	0.164	0.169	1.680	0.160	0.925	120	555	2186	2616	-2.647	301	1885	374	2242	0
2	5	17	"iYLR098C"	"iYLR098C"	7410	17150	150	246	251	109	90	97	34	85	78	0	1169	943	568	75	104	129	84	73	0	0.143	0.185	0.191	0.228	2.304	0.172	0.802	156	560	1250	1029	-2.810	156	1094	161	868	0
2	6	17	"iYLR104W"	"iYLR104W"	7600	17150	150	261	263	126	93	100	40	80	73	0	1107	974	583	76	98	83	85	80	0	0.163	0.189	0.181	0.216	2.493	0.177	0.731	156	585	1199	1068	-2.618	168	1031	170	898	0
2	7	17	"iYLR117C"	"iYLR117C"	7800	17140	150	2160	1901	1136	95	106	48	94	91	0	5227	4327	2889	78	123	138	89	86	0	0.401	0.425	0.441	0.521	1.841	0.407	0.955	156	667	7214	6055	-1.318	2065	5149	1806	4249	0
2	8	17	"iYLR121C"	"iYLR121C"	8010	17130	130	566	507	243	91	101	43	87	81	0	2552	2217	1281	75	125	162	84	80	0	0.192	0.194	0.198	0.228	2.035	0.182	0.896	120	612	2952	2558	-2.383	475	2477	416	2142	0
2	9	17	"iYLR125W"	"iYLR125W"	8220	17130	140	1847	1657	945	94	101	59	97	92	0	2937	2503	1564	75	108	176	91	84	0	0.613	0.644	0.652	0.707	1.537	0.625	0.962	156	665	4615	3991	-0.707	1753	2862	1563	2428	0
2	10	17	"itD(GUC)L1"	"itD(GUC)L1"	8410	17130	130	363	339	149	92	98	44	83	79	0	827	688	381	73	84	48	80	80	0	0.359	0.402	0.398	0.398	1.797	0.376	0.813	120	537	1025	862	-1.476	271	754	247	615	0
2	11	17	"iYLR147C"	"iYLR147C"	8610	17130	130	1111	964	476	95	109	64	90	86	0	2007	1660	896	76	107	130	87	85	0	0.526	0.549	0.540	0.558	1.401	0.536	0.937	120	577	2947	2453	-0.926	1016	1931	869	1584	0
2	12	17	"iYLR151C"	"iYLR151C"	8820	17130	140	713	598	333	95	110	65	83	78	0	1515	1221	756	74	109	129	83	80	0	0.429	0.439	0.436	0.422	1.667	0.430	0.913	156	662	2059	1650	-1.221	618	1441	503	1147	0
2	13	17	"iYLR459W"	"iYLR459W"	9010	17120	130	1119	1092	598	92	101	45	97	94	0	1799	1784	1092	73	93	86	92	88	0	0.595	0.584	0.603	0.675	1.809	0.555	0.954	120	552	2753	2711	-0.749	1027	1726	1000	1711	0
2	14	17	"iYLR461W-1"	"iYLR461W-1"	9220	17120	140	4772	4918	3229	94	103	54	100	100	0	7731	8325	5748	73	93	94	98	98	0	0.611	0.585	0.582	0.650	1.704	0.568	0.957	156	626	12336	13076	-0.711	4678	7658	4824	8252	0
2	15	17	"iYML132W-0"	"iYML132W-0"	9420	17120	140	1349	1560	1243	93	102	61	91	85	0	1927	2321	2084	70	86	91	79	73	0	0.676	0.652	0.680	0.950	2.708	0.606	0.908	156	638	3113	3718	-0.564	1256	1857	1467	2251	0
2	16	17	"iYML117W-A"	"iYML117W-A"	9590	17090	90	886	901	767	97	165	234	61	53	0	1222	1241	1081	71	167	343	61	55	0	0.685	0.687	0.686	0.821	2.492	0.683	0.878	52	351	1940	1974	-0.545	789	1151	804	1170	0
2	17	17	"iYML113W"	"iYML113W"	9800	17090	110	1377	1322	805	94	171	279	80	70	0	2388	2210	1461	72	207	534	75	70	0	0.554	0.574	0.572	0.694	2.056	0.540	0.919	80	558	3599	3366	-0.852	1283	2316	1228	2138	0
2	18	17	"iYML109W"	"iYML109W"	10010	17100	120	602	550	240	94	139	221	81	61	0	901	734	347	71	161	467	71	20	0	0.612	0.688	0.692	0.731	1.600	0.648	0.881	120	596	1338	1119	-0.708	508	830	456	663	0
2	19	17	"iYML089C"	"iYML089C"	10230	17100	140	489	466	235	90	96	39	89	87	0	1854	1784	1127	71	78	63	89	88	0	0.224	0.219	0.231	0.254	2.136	0.205	0.902	156	704	2182	2089	-2.160	399	1783	376	1713	0
2	20	17	"iYML085C"	"iYML085C"	10420	17090	130	387	366	165	91	99	57	83	78	0	1016	868	433	73	85	77	85	85	0	0.314	0.346	0.350	0.353	1.844	0.332	0.877	120	574	1239	1070	-1.672	296	943	275	795	0
2	21	17	"iYML081W"	"iYML081W"	10620	17090	120	1052	906	451	92	100	47	95	91	0	1549	1214	676	74	89	96	85	79	0	0.651	0.714	0.723	0.825	1.805	0.675	0.892	120	609	2435	1954	-0.620	960	1475	814	1140	0
2	1	18	"iYML068W"	"iYML068W"	6640	17370	140	1556	1314	747	88	96	44	93	90	0	1233	1016	651	72	80	59	85	78	0	1.264	1.299	1.297	1.464	2.317	1.233	0.918	156	690	2629	2170	0.338	1468	1161	1226	944	0
2	2	18	"iYML064C"	"iYML064C"	6830	17360	130	1394	1234	645	91	104	55	97	91	0	2148	1755	996	74	92	74	95	88	0	0.628	0.680	0.696	0.752	1.540	0.652	0.947	120	570	3377	2824	-0.671	1303	2074	1143	1681	0
2	3	18	"iYML060W"	"iYML060W"	7030	17360	130	3090	2691	1303	93	124	122	90	89	0	2134	1748	918	76	110	122	86	82	0	1.456	1.554	1.513	1.636	1.710	1.517	0.947	120	638	5055	4270	0.542	2997	2058	2598	1672	0
2	4	18	"iYMR222C"	"iYMR222C"	7260	17350	130	531	479	227	92	128	133	77	71	0	2634	2109	1185	76	128	193	80	78	0	0.172	0.190	0.194	0.211	1.922	0.178	0.868	120	592	2997	2420	-2.543	439	2558	387	2033	0
2	5	18	"iYMR226C"	"iYMR226C"	7430	17350	130	1111	994	477	96	109	57	93	88	0	2238	1837	973	74	112	129	86	83	0	0.469	0.509	0.498	0.552	1.756	0.492	0.928	120	525	3179	2661	-1.092	1015	2164	898	1763	0
2	6	18	"iYMR230W"	"iYMR230W"	7620	17340	130	625	537	270	97	109	49	87	81	0	3394	2688	1586	78	125	129	85	81	0	0.159	0.169	0.170	0.192	2.016	0.161	0.916	120	575	3844	3050	-2.651	528	3316	440	2610	0
2	7	18	"iYMR245W"	"iYMR245W"	7830	17340	130	1366	1133	618	99	109	50	93	85	0	3553	3091	1833	78	134	151	82	81	0	0.365	0.343	0.348	0.413	2.031	0.337	0.945	120	616	4742	4047	-1.456	1267	3475	1034	3013	0
2	8	18	"iYMRWdelta19-0"	"iYMRWdelta19-0"	8030	17340	130	2293	2121	1136	96	122	117	90	86	0	4222	3692	2111	76	145	261	87	85	0	0.530	0.560	0.569	0.612	1.668	0.541	0.953	120	593	6343	5641	-0.916	2197	4146	2025	3616	0
2	9	18	"iYMR251W-A"	"iYMR251W-A"	8220	17330	130	538	493	238	96	118	113	79	72	0	923	775	427	75	123	236	75	75	0	0.521	0.567	0.560	0.582	1.699	0.503	0.877	120	612	1290	1097	-0.940	442	848	397	700	0
2	10	18	"iYMR267W"	"iYMR267W"	8440	17330	120	895	758	369	93	101	42	89	82	0	1697	1397	724	74	96	85	84	83	0	0.494	0.503	0.507	0.513	1.538	0.491	0.924	120	579	2425	1988	-1.017	802	1623	665	1323	0
2	11	18	"iYMR271C"	"iYMR271C"	8640	17320	130	744	664	325	95	112	68	88	82	0	2180	1711	954	77	117	136	82	80	0	0.309	0.348	0.345	0.365	1.834	0.331	0.900	120	599	2752	2203	-1.696	649	2103	569	1634	0
2	12	18	"iYMR273C"	"iYMR273C"	8850	17320	130	432	405	182	94	103	46	87	81	0	3145	2603	1374	75	119	152	88	85	0	0.110	0.123	0.123	0.138	1.852	0.120	0.885	120	558	3408	2839	-3.183	338	3070	311	2528	0
2	13	18	"iYMR288W"	"iYMR288W"	9030	17310	130	482	444	225	95	105	49	83	76	0	1423	1150	695	76	122	194	76	75	0	0.287	0.325	0.330	0.343	1.762	0.297	0.831	120	594	1734	1423	-1.799	387	1347	349	1074	0
2	14	18	"iYMR292W"	"iYMR292W"	9250	17310	130	490	442	214	92	98	34	85	78	0	542	454	248	75	94	83	76	75	0	0.852	0.923	0.872	0.865	1.895	0.906	0.833	120	609	865	729	-0.231	398	467	350	379	0
2	15	18	"iYMR296C"	"iYMR296C"	9460	17310	130	977	855	411	94	100	37	92	87	0	2887	2477	1237	73	95	77	90	87	0	0.314	0.317	0.324	0.350	1.873	0.310	0.920	120	582	3697	3165	-1.672	883	2814	761	2404	0
2	16	18	"iYNL048W"	"iYNL048W"	9650	17300	130	339	337	144	95	112	84	84	68	0	908	887	490	71	102	126	85	84	0	0.292	0.297	0.279	0.327	2.250	0.295	0.726	120	684	1081	1058	-1.778	244	837	242	816	0
2	17	18	"iYNL043C"	"iYNL043C"	9870	17310	130	1071	942	529	93	118	137	85	76	0	1957	1613	1020	71	109	234	78	76	0	0.519	0.551	0.541	0.586	1.547	0.525	0.918	120	675	2864	2391	-0.947	978	1886	849	1542	0
2	18	18	"iYNL040W"	"iYNL040W"	10070	17300	130	409	464	320	90	101	53	80	71	0	483	503	367	69	88	106	73	65	0	0.771	0.862	0.845	0.854	2.211	0.798	0.832	120	576	733	808	-0.376	319	414	374	434	0
2	19	18	"iYNL027W"	"iYNL027W"	10260	17300	130	7312	6509	4568	90	114	145	94	90	0	2072	1758	1198	71	84	98	84	80	0	3.609	3.805	3.634	3.846	2.046	3.949	0.883	120	516	9223	8106	1.852	7222	2001	6419	1687	0
2	20	18	"iYNL024C"	"iYNL024C"	10430	17290	130	1060	1165	1920	94	133	164	76	71	0	1540	1354	1058	75	118	212	77	65	0	0.659	0.837	0.649	0.764	2.066	1.769	0.255	120	576	2431	2350	-0.601	966	1465	1071	1279	0
2	21	18	"iYNL020C"	"iYNL020C"	10640	17280	130	1858	1647	815	94	117	94	94	92	0	996	878	441	75	104	143	86	81	0	1.915	1.934	1.904	1.823	1.837	1.914	0.897	120	698	2685	2356	0.938	1764	921	1553	803	0
2	1	19	"iYNL003C"	"iYNL003C"	6670	17570	140	1225	1225	754	89	101	54	92	90	0	3420	2969	2041	71	98	114	90	86	0	0.339	0.392	0.401	0.452	1.844	0.370	0.932	156	683	4485	4034	-1.560	1136	3349	1136	2898	0
2	2	19	"iYNR001C"	"iYNR001C"	6860	17560	130	1984	1721	884	93	108	60	95	91	0	4045	3263	1735	76	117	128	90	86	0	0.476	0.511	0.513	0.551	1.533	0.503	0.945	120	527	5860	4815	-1.070	1891	3969	1628	3187	0
2	3	19	"iYNR002C"	"iYNR002C"	7040	17550	130	1327	1142	630	95	129	112	90	85	0	1813	1414	843	77	127	150	83	77	0	0.710	0.783	0.799	0.892	1.799	0.769	0.955	120	568	2968	2384	-0.495	1232	1736	1047	1337	0
2	4	19	"iYNR018W"	"iYNR018W"	7240	17550	130	2023	1739	905	98	139	125	90	87	0	3075	2497	1397	79	150	218	88	83	0	0.643	0.679	0.678	0.776	1.841	0.654	0.962	120	644	4921	4059	-0.638	1925	2996	1641	2418	0
2	5	19	"iYNR022C"	"iYNR022C"	7460	17550	130	1006	886	488	101	133	111	83	80	0	1691	1510	944	77	147	219	79	75	0	0.561	0.548	0.550	0.597	1.674	0.527	0.952	120	609	2519	2218	-0.835	905	1614	785	1433	0
2	6	19	"iYNR027W"	"iYNR027W"	7650	17540	130	276	269	100	96	113	89	77	52	0	1108	907	475	75	125	224	79	75	0	0.174	0.208	0.210	0.253	2.364	0.195	0.760	120	617	1213	1005	-2.521	180	1033	173	832	0
2	7	19	"iYOR064C"	"iYOR064C"	7860	17540	130	493	457	230	96	106	47	84	80	0	2191	1918	1191	75	108	123	81	78	0	0.188	0.196	0.198	0.229	2.181	0.190	0.936	120	575	2513	2204	-2.414	397	2116	361	1843	0
2	8	19	"iYOR068C"	"iYOR068C"	8040	17540	140	2384	2065	1398	99	128	110	87	83	0	4501	3506	2594	78	145	207	78	74	0	0.517	0.574	0.582	0.716	2.045	0.555	0.960	156	635	6708	5394	-0.953	2285	4423	1966	3428	0
2	9	19	"iYOR071C"	"iYOR071C"	8250	17530	130	451	403	193	98	115	68	77	74	0	1782	1376	823	78	127	141	79	75	0	0.207	0.235	0.235	0.266	1.771	0.224	0.853	120	640	2057	1603	-2.271	353	1704	305	1298	0
2	10	19	"iYOR086C"	"iYOR086C"	8480	17530	140	2972	2550	1502	93	105	49	96	94	0	4021	3328	2041	75	121	150	91	89	0	0.730	0.755	0.758	0.787	1.761	0.750	0.957	156	651	6825	5710	-0.455	2879	3946	2457	3253	0
2	11	19	"iYOR090C"	"iYOR090C"	8660	17520	130	996	863	451	92	101	47	94	91	0	3427	2774	1670	74	111	160	87	83	0	0.270	0.286	0.291	0.343	2.103	0.267	0.929	120	528	4257	3471	-1.891	904	3353	771	2700	0
2	12	19	"iYOR094W"	"iYOR094W"	8840	17520	120	570	531	233	96	105	46	87	85	0	2244	1923	1029	77	131	174	86	85	0	0.219	0.236	0.227	0.248	1.593	0.220	0.893	120	514	2641	2281	-2.193	474	2167	435	1846	0
2	13	19	"iYOR112W"	"iYOR112W"	9040	17510	130	1398	1257	710	97	117	70	90	85	0	2527	2207	1372	80	163	239	80	79	0	0.532	0.545	0.549	0.647	1.925	0.513	0.924	120	615	3748	3287	-0.911	1301	2447	1160	2127	0
2	14	19	"iYOR116C"	"iYOR116C"	9240	17510	130	705	633	328	89	104	61	85	80	0	3524	2984	1830	69	110	208	83	81	0	0.178	0.187	0.189	0.222	1.741	0.176	0.933	120	612	4071	3459	-2.488	616	3455	544	2915	0
2	15	19	"iYOR121C"	"iYOR121C"	9450	17510	120	408	386	199	89	95	36	84	79	0	1304	1097	664	60	83	102	84	78	0	0.256	0.286	0.288	0.305	1.886	0.270	0.873	120	528	1563	1334	-1.963	319	1244	297	1037	0
2	16	19	"iYOR138C"	"iYOR138C"	9640	17500	130	463	435	198	95	108	62	84	80	0	1352	1102	608	77	114	131	80	80	0	0.289	0.332	0.345	0.346	1.692	0.320	0.895	120	609	1643	1365	-1.793	368	1275	340	1025	0
2	17	19	"itG(CCC)O"	"itG(CCC)O"	9860	17500	130	147	153	55	93	102	94	23	2	0	256	232	116	75	97	182	49	0	0	0.298	0.382	0.363	0.342	2.247	0.386	0.473	120	607	235	217	-1.745	54	181	60	157	0
2	18	19	"iYOR146W"	"iYOR146W"	10070	17500	140	541	522	261	92	112	132	83	69	0	1887	1752	1062	76	111	226	87	80	0	0.248	0.257	0.265	0.284	1.699	0.243	0.924	156	632	2260	2106	-2.012	449	1811	430	1676	0
2	19	19	"iYPL228W"	"iYPL228W"	10270	17490	130	543	507	228	90	109	116	85	76	0	969	857	444	76	90	86	87	83	0	0.507	0.534	0.529	0.533	1.722	0.505	0.887	120	521	1346	1198	-0.979	453	893	417	781	0
2	20	19	"iYPL224C"	"iYPL224C"	10450	17490	130	1292	1104	677	97	206	1200	50	0	0	4125	3382	2390	81	199	513	79	70	0	0.295	0.305	0.304	0.357	2.062	0.407	0.153	120	577	5239	4308	-1.759	1195	4044	1007	3301	0
2	21	19	"iYPL220W"	"iYPL220W"	10660	17480	130	881	762	382	99	176	1054	15	0	0	3007	2360	1367	78	186	430	81	75	0	0.267	0.291	0.296	0.326	1.840	0.897	0.063	120	713	3711	2945	-1.905	782	2929	663	2282	0
2	1	20	"iYPL203W"	"iYPL203W"	6650	17770	140	1873	1500	878	88	99	54	91	85	0	4702	3514	2323	72	98	125	84	81	0	0.386	0.410	0.403	0.495	1.872	0.390	0.955	156	808	6415	4854	-1.375	1785	4630	1412	3442	0
2	2	20	"iYPL199C"	"iYPL199C"	6860	17760	150	791	685	364	91	107	61	90	83	0	2555	2252	1502	75	126	157	86	79	0	0.282	0.273	0.277	0.330	1.850	0.252	0.918	156	820	3180	2771	-1.825	700	2480	594	2177	0
2	3	20	"iYPL195W"	"iYPL195W"	7060	17750	130	903	803	414	95	113	74	86	84	0	3109	2438	1449	76	131	184	84	83	0	0.266	0.300	0.307	0.352	1.809	0.286	0.933	120	646	3841	3070	-1.908	808	3033	708	2362	0
2	4	20	"itE(UUC)P"	"itE(UUC)P"	7240	17750	130	438	392	184	95	114	75	79	76	0	809	688	389	78	125	175	78	70	0	0.469	0.487	0.487	0.458	2.125	0.431	0.831	120	678	1074	907	-1.092	343	731	297	610	0
2	5	20	"iYPL177C-0"	"iYPL177C-0"	7450	17740	130	575	509	262	98	111	57	85	79	0	3098	2601	1610	77	116	132	87	84	0	0.158	0.163	0.165	0.192	1.876	0.158	0.912	120	679	3498	2935	-2.663	477	3021	411	2524	0
2	6	20	"iYPL174C"	"iYPL174C"	7640	17740	130	1702	1380	808	96	133	160	85	75	0	3689	2784	1733	76	177	389	81	74	0	0.445	0.474	0.477	0.515	2.085	0.460	0.968	120	692	5219	3992	-1.170	1606	3613	1284	2708	0
2	7	20	"iYPL157W"	"iYPL157W"	7850	17740	130	771	676	346	96	138	160	79	73	0	2126	1729	1047	75	187	388	77	74	0	0.329	0.351	0.358	0.407	1.734	0.338	0.919	120	741	2726	2234	-1.603	675	2051	580	1654	0
2	8	20	"iYPL153C"	"iYPL153C"	8080	17740	140	1117	1026	577	93	110	69	91	85	0	2272	1985	1294	73	119	159	82	80	0	0.466	0.488	0.493	0.553	1.726	0.466	0.956	156	770	3223	2845	-1.103	1024	2199	933	1912	0
2	9	20	"iYPL149W"	"iYPL149W"	8250	17730	130	454	438	228	93	104	51	86	81	0	1273	1025	667	74	110	136	82	71	0	0.301	0.363	0.363	0.382	1.903	0.337	0.890	120	638	1560	1296	-1.732	361	1199	345	951	0
2	10	20	"itG(GCC)P2"	"itG(GCC)P2"	8460	17720	130	853	733	357	96	113	64	89	84	0	3194	2637	1442	76	149	212	86	83	0	0.243	0.249	0.246	0.271	1.838	0.238	0.943	120	676	3875	3198	-2.042	757	3118	637	2561	0
2	11	20	"iYPR163C"	"iYPR163C"	8660	17720	130	763	659	325	97	119	81	84	80	0	3305	2598	1392	74	176	315	86	78	0	0.206	0.223	0.222	0.218	1.490	0.219	0.931	120	665	3897	3086	-2.278	666	3231	562	2524	0
2	12	20	"iYPR167C"	"iYPR167C"	8860	17720	140	1430	1293	683	96	115	76	91	87	0	3953	3131	1796	75	158	275	87	83	0	0.344	0.392	0.403	0.452	1.815	0.381	0.954	156	774	5212	4253	-1.540	1334	3878	1197	3056	0
2	13	20	"iYPR183W"	"iYPR183W"	9050	17710	130	1068	905	491	96	117	72	85	80	0	4759	3723	2087	76	171	270	85	80	0	0.208	0.222	0.225	0.224	1.564	0.218	0.946	120	657	5655	4456	-2.268	972	4683	809	3647	0
2	14	20	"iYPR187W"	"iYPR187W"	9260	17710	140	166	224	150	86	97	48	55	47	0	469	718	714	63	108	215	54	48	0	0.197	0.211	0.232	0.265	2.189	0.196	0.845	156	821	486	793	-2.343	80	406	138	655	0
2	15	20	"iYPR191W"	"iYPR191W"	9480	17700	150	76	84	50	85	90	29	7	4	0	32	48	122	57	63	51	3	2	0	0.360	0.111	0.690	0.588	2.689	0.304	0.467	156	794	-34	-10	-1.474	-9	-25	-1	-9	-50
2	16	20	"YALCdelta2"	"YALCdelta2"	9650	17700	130	1757	1451	834	94	115	110	85	77	0	2597	2035	1298	72	109	206	80	76	0	0.659	0.691	0.671	0.701	1.473	0.648	0.953	120	637	4188	3320	-0.602	1663	2525	1357	1963	0
2	17	20	"YBLWTy2-1B"	"YBLWTy2-1B"	9870	17700	140	10892	9820	6605	96	142	216	99	93	0	13899	12287	8481	75	153	356	94	87	0	0.781	0.796	0.809	0.893	1.560	0.788	0.979	156	816	24620	21936	-0.357	10796	13824	9724	12212	0
2	18	20	"YBLWdelta10"	"YBLWdelta10"	10080	17700	140	18224	16432	10542	94	152	253	100	99	0	21009	17951	11981	75	160	374	98	94	0	0.866	0.914	0.918	1.028	1.716	0.898	0.976	156	729	39064	34214	-0.207	18130	20934	16338	17876	0
2	19	20	"YFRWdelta10"	"YFRWdelta10"	10270	17690	140	829	766	491	92	121	156	76	69	0	2292	1877	1400	78	120	198	76	71	0	0.333	0.375	0.384	0.459	2.023	0.367	0.882	156	703	2951	2473	-1.587	737	2214	674	1799	0
2	20	20	"YGRCTy1-2A"	"YGRCTy1-2A"	10470	17690	140	33229	28146	19243	98	263	716	99	91	0	27143	21222	14988	81	264	721	90	84	0	1.224	1.327	1.340	1.528	1.690	1.311	0.980	156	773	60193	49189	0.292	33131	27062	28048	21141	0
2	21	20	"YHLComega1"	"YHLComega1"	10670	17680	130	3214	2679	1554	99	267	721	75	71	0	3381	2720	1665	77	245	688	75	70	0	0.943	0.976	0.989	1.135	1.901	0.977	0.963	120	759	6419	5223	-0.085	3115	3304	2580	2643	0
3	1	1	"PET112"	"YBL080C"	10960	13990	130	704	658	319	90	92	24	95	91	0	1801	1659	931	63	63	37	93	93	0	0.353	0.356	0.356	0.367	1.505	0.322	0.896	120	620	2352	2164	-1.501	614	1738	568	1596	0
3	2	1	"YBL111C"	"YBL111C"	11130	13990	150	4566	4190	2611	92	95	28	98	96	0	8944	7574	5148	65	73	86	91	89	0	0.504	0.546	0.542	0.697	2.085	0.524	0.951	156	840	13353	11607	-0.989	4474	8879	4098	7509	0
3	3	1	"YBR028C"	"YBR028C"	11360	13990	130	461	421	189	95	99	32	91	87	0	1188	1042	535	67	79	98	89	85	0	0.326	0.334	0.349	0.368	1.765	0.331	0.868	120	685	1487	1301	-1.615	366	1121	326	975	0
3	4	1	"RHK1"	"YBL082C"	11550	13990	130	942	894	458	93	100	40	92	89	0	2226	2054	1100	68	78	86	89	88	0	0.393	0.403	0.398	0.399	1.634	0.383	0.912	120	654	3007	2787	-1.346	849	2158	801	1986	0
3	5	1	"YBL113C"	"YBL113C"	11760	13980	140	4049	3579	2042	91	95	27	98	98	0	7837	6701	4107	66	70	73	94	90	0	0.509	0.526	0.527	0.637	1.843	0.506	0.950	156	757	11729	10123	-0.973	3958	7771	3488	6635	0
3	6	1	"YBR030W"	"YBR030W"	11940	13970	130	626	579	249	92	94	25	95	90	0	918	814	414	65	65	30	89	86	0	0.626	0.650	0.639	0.671	1.831	0.612	0.896	120	640	1387	1236	-0.676	534	853	487	749	0
3	7	1	"CDC27"	"YBL084C"	12140	13970	120	1425	1362	588	92	94	23	96	95	0	2211	2020	969	65	65	33	94	93	0	0.621	0.650	0.662	0.667	1.519	0.622	0.927	120	612	3479	3225	-0.687	1333	2146	1270	1955	0
3	8	1	"RER2"	"YBR002C"	12340	13960	130	1800	1569	863	94	99	40	91	88	0	2012	1749	1048	67	72	53	87	85	0	0.877	0.877	0.867	0.944	1.460	0.840	0.932	120	716	3651	3157	-0.189	1706	1945	1475	1682	0
3	9	1	"YBR032W"	"YBR032W"	12560	13960	140	902	818	411	94	99	40	92	91	0	1586	1306	754	67	73	66	89	85	0	0.532	0.584	0.589	0.642	1.969	0.560	0.938	156	774	2327	1963	-0.911	808	1519	724	1239	0
3	10	1	"YBL086C"	"YBL086C"	12750	13950	130	507	460	229	92	95	26	86	83	0	1189	1016	602	66	65	19	85	83	0	0.370	0.387	0.397	0.386	1.636	0.369	0.900	120	660	1538	1318	-1.436	415	1123	368	950	0
3	11	1	"YBR004C"	"YBR004C"	12950	13950	130	4839	4264	1915	91	95	38	97	95	0	1420	1257	608	65	65	32	91	90	0	3.504	3.501	3.551	3.785	1.563	3.508	0.940	120	712	6103	5365	1.809	4748	1355	4173	1192	0
3	12	1	"HMT1"	"YBR034C"	13170	13950	130	936	823	463	89	92	32	90	87	0	2584	2190	1358	63	63	26	90	88	0	0.336	0.345	0.350	0.373	1.844	0.337	0.930	120	678	3368	2861	-1.574	847	2521	734	2127	0
3	13	1	"YCL044C"	"YCL044C"	13350	13940	120	113	115	38	91	94	26	43	21	0	107	111	55	64	63	22	66	48	0	0.512	0.511	0.564	0.579	3.454	0.500	0.140	120	624	65	71	-0.967	22	43	24	47	0
3	14	1	"YCLX03C"	"YCLX03C"	13580	13940	120	2814	2380	1243	89	93	25	98	97	0	2205	1798	984	66	65	23	91	90	0	1.274	1.323	1.350	1.422	1.735	1.320	0.945	120	600	4864	4023	0.349	2725	2139	2291	1732	0
3	15	1	"YCR022C"	"YCR022C"	13750	13930	130	1613	1391	570	89	91	23	100	99	0	3393	2790	1309	66	68	55	98	97	0	0.458	0.478	0.480	0.517	1.404	0.454	0.948	120	706	4851	4026	-1.126	1524	3327	1302	2724	0
3	16	1	"YCL046W"	"YCL046W"	14000	13920	150	106	134	93	89	92	24	41	25	0	78	155	195	65	67	42	30	25	0	1.308	0.500	0.606	0.680	3.257	0.481	0.760	156	879	30	135	0.387	17	13	45	90	-50
3	17	1	"YCLX05C"	"YCLX05C"	14160	13930	130	1851	1562	766	89	92	26	97	92	0	4030	3210	1669	65	69	56	90	89	0	0.444	0.468	0.476	0.553	1.889	0.457	0.955	120	610	5727	4618	-1.170	1762	3965	1473	3145	0
3	18	1	"YCR024C"	"YCR024C"	14360	13910	130	1867	1656	769	90	102	117	91	90	0	3687	3332	1755	66	91	288	88	87	0	0.491	0.479	0.491	0.523	1.491	0.463	0.946	120	761	5398	4832	-1.027	1777	3621	1566	3266	0
3	19	1	"YCL048W"	"YCL048W"	14580	13910	80	252	394	388	90	92	26	84	78	0	336	619	699	66	115	626	32	15	0	0.600	0.550	0.552	0.544	2.676	0.130	0.199	52	319	432	857	-0.737	162	270	304	553	0
3	20	1	"YCLX07W"	"YCLX07W"	14770	13910	130	2414	1952	1119	92	95	29	93	90	0	3654	2814	1722	65	69	41	86	84	0	0.647	0.677	0.683	0.728	2.020	0.659	0.954	120	718	5911	4609	-0.628	2322	3589	1860	2749	0
3	21	1	"YCR025C"	"YCR025C"	14970	13910	130	1630	1323	649	90	93	29	95	91	0	2426	1983	1068	67	71	46	90	89	0	0.653	0.644	0.642	0.673	1.710	0.628	0.958	120	777	3899	3149	-0.615	1540	2359	1233	1916	0
3	1	2	"APA1"	"YCL050C"	10960	14180	120	159	168	67	92	107	233	3	0	0	185	217	144	63	70	175	35	8	0	0.549	0.494	0.487	0.499	2.344	0.438	0.644	120	539	189	230	-0.865	67	122	76	154	0
3	2	2	"YCLX09W"	"YCLX09W"	11190	14180	130	2204	1857	950	91	105	217	89	85	0	4226	3471	1879	65	84	195	89	87	0	0.508	0.518	0.513	0.550	1.699	0.499	0.948	120	628	6274	5172	-0.978	2113	4161	1766	3406	0
3	3	2	"RSG1"	"YCR027C"	11380	14180	130	1280	1140	509	90	93	29	96	94	0	3436	2864	1399	67	78	107	92	88	0	0.353	0.375	0.379	0.406	1.558	0.357	0.938	120	558	4559	3847	-1.501	1190	3369	1050	2797	0
3	4	2	"YDL211C"	"YDL211C"	11570	14180	120	203	252	148	93	96	27	87	75	0	500	717	657	66	70	87	82	78	0	0.253	0.244	0.240	0.250	1.971	0.219	0.841	120	537	544	810	-1.980	110	434	159	651	0
3	5	2	"AAD4"	"YDL243C"	11770	14170	120	110	113	28	90	92	25	41	15	0	125	115	50	65	68	82	26	0	0	0.333	0.460	0.398	0.348	3.224	0.042	0.017	120	532	80	73	-1.585	20	60	23	50	0
3	6	2	"LUV1"	"YDR027C"	11970	14170	120	989	914	318	90	92	24	100	100	0	1582	1366	559	65	64	31	99	98	0	0.593	0.633	0.639	0.675	1.429	0.606	0.925	120	566	2416	2125	-0.755	899	1517	824	1301	0
3	7	2	"YDL213C"	"YDL213C"	12170	14160	120	251	339	244	90	92	22	92	83	0	551	816	714	65	65	37	90	89	0	0.331	0.332	0.316	0.352	1.906	0.324	0.894	120	592	647	1000	-1.594	161	486	249	751	0
3	8	2	"HXT15"	"YDL245C"	12390	14160	120	2958	2582	1236	91	97	42	99	98	0	5949	4952	2602	66	81	208	95	90	0	0.487	0.510	0.504	0.555	1.544	0.487	0.929	120	545	8750	7377	-1.037	2867	5883	2491	4886	0
3	9	2	"YDR029W"	"YDR029W"	12560	14150	130	278	265	88	92	95	26	95	90	0	697	607	256	66	75	198	85	73	0	0.295	0.320	0.330	0.335	1.762	0.290	0.764	120	566	817	714	-1.762	186	631	173	541	0
3	10	2	"GDH2"	"YDL215C"	12770	14150	120	548	531	260	90	93	25	91	88	0	1183	1041	575	66	65	21	89	86	0	0.410	0.452	0.445	0.479	2.026	0.434	0.893	120	589	1575	1416	-1.286	458	1117	441	975	0
3	11	2	"YDL247W"	"YDL247W"	12980	14140	120	271	310	181	88	90	22	88	79	0	389	508	393	64	65	54	79	75	0	0.563	0.500	0.569	0.522	1.999	0.437	0.825	120	563	508	666	-0.829	183	325	222	444	0
3	12	2	"YDR031W"	"YDR031W"	13180	14140	120	229	223	104	87	90	22	80	72	0	1062	1061	723	65	68	69	84	80	0	0.142	0.137	0.128	0.138	2.212	0.128	0.789	120	530	1139	1132	-2.812	142	997	136	996	0
3	13	2	"TIM22"	"YDL217C"	13370	14140	120	1061	1018	551	88	92	23	95	92	0	1688	1576	973	66	67	54	89	88	0	0.600	0.616	0.619	0.697	1.749	0.586	0.935	120	533	2595	2440	-0.737	973	1622	930	1510	0
3	14	2	"NTH1"	"YDR001C"	13570	14130	120	977	1052	662	89	93	23	95	91	0	429	474	338	66	70	88	80	70	0	2.446	2.360	2.455	2.502	1.758	2.107	0.784	120	575	1251	1371	1.291	888	363	963	408	0
3	15	2	"MRH1"	"YDR033W"	13780	14130	130	1211	1151	696	89	92	24	94	92	0	1536	1501	1004	68	75	94	87	84	0	0.764	0.741	0.760	0.792	1.605	0.702	0.909	120	616	2590	2495	-0.388	1122	1468	1062	1433	0
3	16	2	"YDR346C"	"YDR346C"	13980	14130	140	1193	1227	671	88	90	24	98	96	0	1709	1830	1221	65	68	47	92	87	0	0.672	0.645	0.644	0.796	2.057	0.590	0.921	156	646	2749	2904	-0.573	1105	1644	1139	1765	0
3	17	2	"LSM6"	"YDR378C"	14190	14130	130	287	273	108	89	90	24	88	87	0	2022	1684	806	66	68	47	89	87	0	0.101	0.114	0.110	0.129	2.086	0.111	0.825	120	570	2154	1802	-3.304	198	1956	184	1618	0
3	18	2	"STE14"	"YDR410C"	14380	14120	130	2567	2112	1046	91	115	167	93	90	0	3981	3160	1747	67	115	350	90	80	0	0.633	0.653	0.640	0.716	1.627	0.626	0.950	120	636	6390	5114	-0.661	2476	3914	2021	3093	0
3	19	2	"YDR348C"	"YDR348C"	14590	14120	120	184	203	101	91	105	115	38	14	0	266	294	187	66	88	178	55	25	0	0.465	0.491	0.485	0.498	2.124	0.481	0.753	120	572	293	340	-1.105	93	200	112	228	0
3	20	2	"YDR380W"	"YDR380W"	14770	14110	130	2236	2107	769	94	97	31	100	100	0	5454	4936	1967	68	79	93	100	100	0	0.398	0.414	0.406	0.428	1.284	0.396	0.957	120	587	7528	6881	-1.330	2142	5386	2013	4868	0
3	21	2	"YDR412W"	"YDR412W"	14980	14110	130	1385	1207	574	91	97	34	92	90	0	4462	3787	1992	69	89	155	89	86	0	0.295	0.300	0.307	0.356	1.903	0.286	0.943	120	709	5687	4834	-1.763	1294	4393	1116	3718	0
3	1	3	"TCM10"	"YDR350C"	10990	14390	140	910	814	455	89	101	194	79	67	0	3627	2737	1725	64	70	152	85	83	0	0.230	0.271	0.280	0.326	2.097	0.261	0.939	156	784	4384	3398	-2.118	821	3563	725	2673	0
3	2	3	"RPP2B"	"YDR382W"	11200	14390	130	773	773	585	90	95	36	95	88	0	1588	1310	693	66	72	76	89	85	0	0.449	0.549	0.492	0.584	2.026	0.574	0.653	120	575	2205	1927	-1.156	683	1522	683	1244	0
3	3	3	"ERD1"	"YDR414C"	11390	14380	130	1101	981	489	91	95	28	94	92	0	3982	3288	1916	66	76	64	95	90	0	0.258	0.276	0.277	0.324	1.818	0.261	0.951	120	626	4926	4112	-1.955	1010	3916	890	3222	0
3	4	3	"YDR352W"	"YDR352W"	11610	14380	130	3203	2895	1473	90	95	29	98	97	0	4011	3429	1752	66	75	58	90	88	0	0.789	0.834	0.819	0.913	1.702	0.814	0.950	120	647	7058	6168	-0.342	3113	3945	2805	3363	0
3	5	3	"YDR384C"	"YDR384C"	11810	14370	130	953	847	433	89	93	27	90	86	0	3053	2630	1570	66	75	87	84	82	0	0.289	0.296	0.293	0.337	1.819	0.279	0.949	120	612	3851	3322	-1.790	864	2987	758	2564	0
3	6	3	"SYF1"	"YDR416W"	12010	14370	130	2197	1977	1071	90	93	23	100	98	0	4336	3729	2143	66	100	648	82	80	0	0.493	0.515	0.529	0.599	1.889	0.458	0.836	120	599	6377	5550	-1.019	2107	4270	1887	3663	0
3	7	3	"SHC1"	"YER096W"	12200	14370	130	1750	1524	679	89	91	24	96	95	0	4084	3398	1584	65	64	25	95	91	0	0.413	0.431	0.440	0.502	1.822	0.424	0.959	120	605	5680	4768	-1.275	1661	4019	1435	3333	0
3	8	3	"LCP5"	"YER127W"	12390	14360	130	2122	1761	932	92	108	81	92	88	0	4718	3697	2107	66	112	269	86	85	0	0.436	0.460	0.463	0.523	1.653	0.443	0.957	120	607	6682	5300	-1.196	2030	4652	1669	3631	0
3	9	3	"BUR6"	"YER159C"	12600	14360	130	479	437	186	94	110	81	86	78	0	2701	2211	1097	67	125	274	87	83	0	0.146	0.160	0.162	0.173	1.698	0.156	0.850	120	636	3019	2487	-2.774	385	2634	343	2144	0
3	10	3	"UBP9"	"YER098W"	12790	14350	130	3002	2505	1377	91	97	33	99	95	0	5331	4411	2603	67	99	270	85	81	0	0.553	0.556	0.558	0.656	1.734	0.538	0.964	120	615	8175	6758	-0.855	2911	5264	2414	4344	0
3	11	3	"PAK1"	"YER129W"	13010	14350	140	2212	2532	1857	88	94	32	98	94	0	3451	3775	2914	65	74	64	91	87	0	0.627	0.659	0.675	0.761	1.814	0.645	0.975	156	704	5510	6154	-0.673	2124	3386	2444	3710	0
3	12	3	"SPT2"	"YER161C"	13200	14340	130	3449	2990	1223	89	110	113	98	95	0	7045	5970	2661	67	107	244	94	93	0	0.482	0.491	0.486	0.535	1.485	0.477	0.972	120	574	10338	8804	-1.054	3360	6978	2901	5903	0
3	13	3	"UBC6"	"YER100W"	13400	14340	140	1610	1354	721	92	107	92	96	89	0	4290	3498	1995	67	103	229	92	87	0	0.359	0.368	0.368	0.411	1.754	0.360	0.960	156	667	5741	4693	-1.476	1518	4223	1262	3431	0
3	14	3	"RPS26B"	"YER131W"	13600	14340	130	3450	2986	1552	92	98	45	92	91	0	3585	2988	1608	67	73	66	87	86	0	0.955	0.991	1.018	1.044	1.595	1.003	0.955	120	630	6876	5815	-0.067	3358	3518	2894	2921	0
3	15	3	"YER163C"	"YER163C"	13810	14330	130	696	604	306	90	96	35	89	86	0	4477	3643	2154	68	86	100	88	85	0	0.137	0.144	0.151	0.185	2.282	0.139	0.929	120	619	5015	4089	-2.863	606	4409	514	3575	0
3	16	3	"RPS8B"	"YER102W"	14020	14330	140	1630	1366	822	91	95	34	93	92	0	4330	3307	2148	68	95	160	86	82	0	0.361	0.394	0.398	0.451	2.025	0.385	0.956	156	582	5801	4514	-1.470	1539	4262	1275	3239	0
3	17	3	"GLC7"	"YER133W"	14200	14330	140	1145	1061	480	91	95	35	97	96	0	3445	2998	1486	68	77	93	95	92	0	0.312	0.331	0.333	0.360	1.535	0.322	0.955	156	618	4431	3900	-1.680	1054	3377	970	2930	0
3	18	3	"PAB1"	"YER165W"	14420	14320	130	1526	1306	648	91	105	111	89	85	0	4376	3560	1919	68	89	169	88	85	0	0.333	0.348	0.351	0.390	1.851	0.334	0.951	120	632	5743	4707	-1.586	1435	4308	1215	3492	0
3	19	3	"CDC43"	"YGL155W"	14620	14310	130	3525	2956	1353	91	99	46	97	96	0	6160	4940	2455	69	82	67	94	90	0	0.564	0.588	0.596	0.689	1.734	0.570	0.968	120	551	9525	7736	-0.827	3434	6091	2865	4871	0
3	20	3	"COX4"	"YGL187C"	14810	14320	140	577	585	364	94	103	47	89	78	0	2377	2079	1558	72	95	113	84	80	0	0.210	0.245	0.251	0.288	1.849	0.235	0.939	156	617	2788	2498	-2.255	483	2305	491	2007	0
3	21	3	"YGL219C"	"YGL219C"	15000	14310	130	2915	2480	1204	89	96	38	99	98	0	6989	5667	3065	68	88	141	94	90	0	0.408	0.427	0.428	0.516	1.805	0.410	0.968	120	639	9747	7990	-1.292	2826	6921	2391	5599	0
3	1	4	"YGL157W"	"YGL157W"	11010	14590	130	2212	1928	1080	89	93	28	95	93	0	3124	2473	1461	66	74	132	81	80	0	0.694	0.764	0.773	0.910	1.918	0.754	0.908	120	678	5181	4246	-0.526	2123	3058	1839	2407	0
3	2	4	"RPS26A"	"YGL189C"	11210	14580	140	2751	2441	1600	90	98	48	94	89	0	2689	2357	1625	66	82	143	83	80	0	1.014	1.026	1.013	1.201	1.899	1.004	0.926	156	647	5284	4642	0.021	2661	2623	2351	2291	0
3	3	4	"NIF3"	"YGL221C"	11410	14580	130	479	409	207	92	101	47	79	75	0	3917	3002	1920	66	104	138	80	77	0	0.100	0.108	0.111	0.137	2.060	0.099	0.867	120	610	4238	3253	-3.315	387	3851	317	2936	0
3	4	4	"YGL159W"	"YGL159W"	11620	14580	130	1158	968	571	92	97	29	87	84	0	3260	2500	1681	67	99	127	77	75	0	0.334	0.360	0.354	0.426	1.925	0.336	0.907	120	631	4259	3309	-1.583	1066	3193	876	2433	0
3	5	4	"COX13"	"YGL191W"	11820	14570	130	699	593	309	92	102	44	84	81	0	1610	1246	795	69	100	127	79	73	0	0.394	0.426	0.427	0.446	1.795	0.389	0.903	120	598	2148	1678	-1.344	607	1541	501	1177	0
3	6	4	"YGL223C"	"YGL223C"	12010	14570	130	951	873	401	90	98	42	93	89	0	4736	4035	2021	67	116	632	87	80	0	0.184	0.197	0.202	0.205	1.606	0.169	0.825	120	641	5530	4751	-2.439	861	4669	783	3968	0
3	7	4	"YGL161C"	"YGL161C"	12240	14570	130	1965	1773	780	89	92	27	99	96	0	4699	4026	1821	65	72	82	95	94	0	0.405	0.425	0.450	0.456	1.496	0.422	0.938	120	592	6510	5645	-1.305	1876	4634	1684	3961	0
3	8	4	"YGL193C"	"YGL193C"	12400	14560	120	385	351	172	92	99	51	80	73	0	1651	1350	821	69	94	108	83	79	0	0.185	0.202	0.213	0.233	1.964	0.188	0.851	120	527	1875	1540	-2.433	293	1582	259	1281	0
3	9	4	"GOG5"	"YGL225W"	12620	14560	130	810	681	360	91	95	29	88	85	0	4859	3854	2244	69	100	263	83	81	0	0.150	0.156	0.160	0.185	2.052	0.150	0.895	120	629	5509	4375	-2.736	719	4790	590	3785	0
3	10	4	"RNH70"	"YGR276C"	12810	14550	130	1842	1507	833	93	99	32	93	92	0	4420	3455	2225	68	101	277	83	77	0	0.402	0.417	0.415	0.472	1.896	0.381	0.914	120	600	6101	4801	-1.315	1749	4352	1414	3387	0
3	11	4	"YHL012W"	"YHL012W"	13010	14550	130	6236	5274	2462	92	104	71	100	98	0	4008	3192	1599	67	82	69	95	92	0	1.559	1.658	1.671	1.853	1.699	1.644	0.943	120	593	10085	8307	0.641	6144	3941	5182	3125	0
3	12	4	"YHL044W"	"YHL044W"	13220	14550	130	1866	1529	794	91	111	106	89	85	0	3569	2840	1593	67	101	220	85	80	0	0.507	0.519	0.529	0.585	1.915	0.510	0.930	120	631	5277	4211	-0.980	1775	3502	1438	2773	0
3	13	4	"YGR278W"	"YGR278W"	13410	14540	130	3086	2591	1205	91	98	38	95	95	0	5641	4595	2282	67	83	84	89	89	0	0.537	0.552	0.548	0.580	1.941	0.541	0.942	120	596	8569	7028	-0.896	2995	5574	2500	4528	0
3	14	4	"YLF2"	"YHL014C"	13620	14540	120	4165	3484	1864	93	102	52	95	95	0	4737	3635	2031	68	84	88	87	87	0	0.872	0.951	0.919	1.104	1.951	0.931	0.923	120	560	8741	6958	-0.197	4072	4669	3391	3567	0
3	15	4	"YHL046C"	"YHL046C"	13810	14530	130	8088	6401	3653	92	124	164	95	91	0	14524	11133	6787	69	148	353	86	85	0	0.553	0.570	0.573	0.721	1.887	0.546	0.938	120	613	22451	17373	-0.854	7996	14455	6309	11064	0
3	16	4	"YGR280C"	"YGR280C"	14020	14530	130	2309	1848	1057	93	133	174	84	80	0	5805	4472	2761	70	172	385	80	76	0	0.386	0.399	0.403	0.504	2.109	0.380	0.932	120	560	7951	6157	-1.372	2216	5735	1755	4402	0
3	17	4	"DUR3"	"YHL016C"	14200	14520	130	6695	5687	2931	95	115	77	99	96	0	5502	4743	2620	71	115	175	91	90	0	1.215	1.197	1.182	1.329	1.632	1.155	0.940	120	560	12031	10264	0.281	6600	5431	5592	4672	0
3	18	4	"COS8"	"YHL048W"	14410	14520	130	3262	2689	1355	94	106	57	96	94	0	6154	4927	2758	69	86	91	93	90	0	0.521	0.534	0.538	0.617	1.693	0.499	0.944	120	637	9253	7453	-0.942	3168	6085	2595	4858	0
3	19	4	"BGL2"	"YGR282C"	14620	14510	130	960	806	445	94	105	45	87	85	0	4253	3350	2010	72	122	189	85	80	0	0.207	0.217	0.222	0.259	2.048	0.206	0.925	120	640	5047	3990	-2.271	866	4181	712	3278	0
3	20	4	"YHL018W"	"YHL018W"	14830	14520	140	954	821	472	92	101	44	89	86	0	3598	2847	1876	72	121	192	85	82	0	0.244	0.263	0.264	0.315	2.068	0.253	0.934	156	594	4388	3504	-2.032	862	3526	729	2775	0
3	21	4	"YHL050C"	"YHL050C"	15020	14510	140	9624	10703	7823	90	97	43	100	99	0	18535	19579	14994	69	94	178	90	87	0	0.516	0.544	0.554	0.795	2.545	0.527	0.958	156	748	28000	30123	-0.954	9534	18466	10613	19510	0
3	1	5	"YIL086C"	"YIL086C"	11050	14780	80	175	216	139	88	91	23	78	63	0	222	329	376	66	72	71	67	51	0	0.558	0.487	0.492	0.497	2.566	0.363	0.764	52	331	243	391	-0.842	87	156	128	263	0
3	2	5	"RHO3"	"YIL118W"	11240	14780	130	510	470	205	90	96	48	91	88	0	2524	2212	1186	66	81	103	91	90	0	0.171	0.177	0.183	0.208	1.821	0.167	0.905	120	568	2878	2526	-2.549	420	2458	380	2146	0
3	3	5	"DNA43"	"YIL150C"	11420	14780	120	1323	1167	495	91	95	30	98	93	0	4515	3760	1790	67	98	151	92	90	0	0.277	0.291	0.295	0.317	1.667	0.281	0.951	120	542	5680	4769	-1.852	1232	4448	1076	3693	0
3	4	5	"YIL088C"	"YIL088C"	11630	14780	130	2055	1725	821	93	100	38	97	95	0	5270	4344	2279	68	93	103	93	90	0	0.377	0.382	0.382	0.431	1.631	0.369	0.965	120	615	7164	5908	-1.407	1962	5202	1632	4276	0
3	5	5	"YIL120W"	"YIL120W"	11820	14770	130	2495	2120	914	93	108	58	100	96	0	3814	3174	1508	70	111	158	94	92	0	0.642	0.653	0.655	0.729	1.679	0.629	0.967	120	599	6146	5131	-0.640	2402	3744	2027	3104	0
3	6	5	"YIL152W"	"YIL152W"	12020	14770	120	978	876	420	90	100	47	90	88	0	3107	2640	1387	69	97	152	87	85	0	0.292	0.306	0.308	0.325	1.806	0.298	0.965	120	586	3926	3357	-1.774	888	3038	786	2571	0
3	7	5	"YIL090W"	"YIL090W"	12240	14770	130	3813	3256	1646	90	95	31	98	96	0	4884	3875	2133	67	76	80	91	89	0	0.773	0.831	0.828	0.886	1.513	0.806	0.972	120	610	8540	6974	-0.372	3723	4817	3166	3808	0
3	8	5	"YIL122W"	"YIL122W"	12430	14760	130	1113	971	516	92	96	27	94	91	0	3979	3368	2008	68	81	68	89	86	0	0.261	0.266	0.267	0.293	1.991	0.258	0.968	120	585	4932	4179	-1.938	1021	3911	879	3300	0
3	9	5	"IMP2'"	"YIL154C"	12620	14760	130	260	255	92	92	94	24	89	86	0	888	763	335	67	77	67	88	87	0	0.205	0.234	0.231	0.239	1.765	0.228	0.805	120	581	989	859	-2.289	168	821	163	696	0
3	10	5	"YIL092W"	"YIL092W"	12820	14750	130	1834	1599	812	92	97	30	95	94	0	4909	4018	2316	68	82	104	91	89	0	0.360	0.382	0.381	0.452	1.988	0.362	0.962	120	615	6583	5457	-1.475	1742	4841	1507	3950	0
3	11	5	"AYR1"	"YIL124W"	13030	14750	140	2273	1979	932	92	100	42	98	96	0	3901	3243	1657	68	79	54	96	92	0	0.569	0.594	0.598	0.661	1.651	0.583	0.977	156	670	6014	5062	-0.813	2181	3833	1887	3175	0
3	12	5	"UBP7"	"YIL156W"	13230	14750	130	2899	2535	1232	88	93	32	99	97	0	6060	5310	2769	67	72	53	95	94	0	0.469	0.467	0.470	0.540	1.832	0.456	0.970	120	564	8804	7690	-1.092	2811	5993	2447	5243	0
3	13	5	"BNA1"	"YJR025C"	13420	14740	120	2190	1900	1107	90	97	39	95	88	0	2911	2337	1435	69	79	59	85	83	0	0.739	0.798	0.815	0.876	1.579	0.786	0.971	120	573	4942	4078	-0.437	2100	2842	1810	2268	0
3	14	5	"CDC8"	"YJR057W"	13640	14740	130	1077	888	486	95	100	39	87	85	0	3894	3021	1857	69	91	125	85	80	0	0.257	0.269	0.269	0.309	1.875	0.263	0.961	120	598	4807	3745	-1.962	982	3825	793	2952	0
3	15	5	"GRR1"	"YJR090C"	13810	14730	130	631	590	299	95	117	142	80	73	0	1165	1030	615	69	137	351	74	68	0	0.489	0.515	0.536	0.544	1.598	0.497	0.928	120	568	1632	1456	-1.032	536	1096	495	961	0
3	16	5	"YJR027W"	"YJR027W"	14010	14720	130	852	799	428	93	105	79	85	83	0	1178	1048	625	70	102	180	81	77	0	0.685	0.722	0.730	0.728	1.614	0.695	0.942	120	672	1867	1684	-0.546	759	1108	706	978	0
3	17	5	"PTK2"	"YJR059W"	14250	14720	130	1082	1105	637	92	101	52	93	92	0	2360	2666	1701	69	81	84	91	91	0	0.432	0.390	0.392	0.422	1.706	0.375	0.945	120	622	3281	3610	-1.210	990	2291	1013	2597	0
3	18	5	"BUD4"	"YJR092W"	14410	14720	130	306	316	147	91	95	28	90	87	0	454	504	320	68	74	58	89	86	0	0.557	0.516	0.532	0.531	1.937	0.270	0.471	120	595	601	661	-0.844	215	386	225	436	0
3	19	5	"YJR029W"	"YJR029W"	14640	14720	130	3382	2915	1474	91	97	37	97	94	0	4429	3789	1911	69	100	187	91	90	0	0.755	0.759	0.779	0.792	1.326	0.763	0.974	120	643	7651	6544	-0.406	3291	4360	2824	3720	0
3	20	5	"YJR061W"	"YJR061W"	14820	14710	120	558	529	237	88	92	28	93	90	0	630	604	321	69	80	93	85	82	0	0.838	0.824	0.814	0.881	2.098	0.787	0.917	120	523	1031	976	-0.255	470	561	441	535	0
3	21	5	"IME1"	"YJR094C"	15030	14710	130	752	768	427	89	94	37	96	89	0	1817	1920	1200	68	84	175	88	85	0	0.379	0.367	0.372	0.398	1.950	0.352	0.931	120	692	2412	2531	-1.399	663	1749	679	1852	0
3	1	6	"GEA1"	"YJR031C"	11030	14990	130	1133	993	552	91	94	30	90	86	0	1652	1503	927	66	68	39	87	85	0	0.657	0.628	0.640	0.641	1.551	0.602	0.932	120	709	2628	2339	-0.606	1042	1586	902	1437	0
3	2	6	"RPA12"	"YJR063W"	11230	14980	150	853	937	600	91	95	27	93	90	0	1351	1522	1130	69	82	108	85	82	0	0.594	0.582	0.585	0.675	1.872	0.561	0.878	156	732	2044	2299	-0.751	762	1282	846	1453	0
3	3	6	"SFC1"	"YJR095W"	11430	14980	130	721	676	361	91	94	28	91	90	0	1530	1501	966	70	81	114	85	84	0	0.432	0.409	0.421	0.454	1.682	0.377	0.908	120	591	2090	2016	-1.213	630	1460	585	1431	0
3	4	6	"YKR020W"	"YKR020W"	11640	14980	120	507	502	288	92	96	29	92	90	0	1554	1539	1041	69	84	81	91	90	0	0.279	0.279	0.288	0.291	1.456	0.270	0.927	120	556	1900	1880	-1.839	415	1485	410	1470	0
3	5	6	"MRS4"	"YKR052C"	11840	14970	130	271	281	105	91	98	42	93	86	0	1044	1080	568	71	93	135	94	90	0	0.185	0.188	0.197	0.205	1.781	0.170	0.795	120	599	1153	1199	-2.434	180	973	190	1009	0
3	6	6	"HBS1"	"YKR084C"	12030	14970	130	712	656	329	90	92	26	94	92	0	2024	1707	954	71	82	122	87	85	0	0.318	0.346	0.351	0.390	1.768	0.332	0.906	120	565	2575	2202	-1.651	622	1953	566	1636	0
3	7	6	"YKR022C"	"YKR022C"	12220	14960	130	2099	2270	1446	91	98	37	94	92	0	3097	3183	2274	70	80	71	86	85	0	0.663	0.700	0.688	0.834	1.852	0.664	0.955	120	627	5035	5292	-0.592	2008	3027	2179	3113	0
3	8	6	"DYN1"	"YKR054C"	12440	14960	120	150	168	69	92	97	34	65	45	0	192	216	124	68	77	74	69	40	0	0.468	0.514	0.553	0.525	2.552	0.477	0.585	120	555	182	224	-1.096	58	124	76	148	0
3	9	6	"PRP16"	"YKR086W"	12620	14950	130	569	703	468	92	93	24	97	92	0	1250	1539	1175	67	72	58	90	89	0	0.403	0.415	0.429	0.482	1.854	0.397	0.932	120	611	1660	2083	-1.310	477	1183	611	1472	0
3	10	6	"DBP7"	"YKR024C"	12850	14950	130	671	830	616	89	93	29	95	91	0	701	851	648	69	73	44	89	85	0	0.921	0.948	0.952	0.948	1.541	0.933	0.922	120	589	1214	1523	-0.119	582	632	741	782	0
3	11	6	"RNC1"	"YKR056W"	13020	14950	120	1044	1246	854	90	94	30	94	89	0	1703	1901	1443	69	76	101	86	84	0	0.584	0.631	0.635	0.650	1.731	0.601	0.942	120	495	2588	2988	-0.776	954	1634	1156	1832	0
3	12	6	"YKR088C"	"YKR088C"	13230	14940	130	499	559	359	91	95	28	87	83	0	955	1097	828	69	75	91	83	80	0	0.460	0.455	0.457	0.493	1.645	0.434	0.935	120	628	1294	1496	-1.119	408	886	468	1028	0
3	13	6	"GCN3"	"YKR026C"	13440	14940	130	3344	2676	1526	90	108	78	92	90	0	4450	3451	2033	71	98	123	87	85	0	0.743	0.765	0.760	0.857	1.831	0.730	0.927	120	596	7633	5966	-0.428	3254	4379	2586	3380	0
3	14	6	"GLG1"	"YKR058W"	13630	14940	120	1099	1069	559	93	109	80	92	90	0	3781	3844	2276	69	116	237	91	90	0	0.271	0.259	0.257	0.274	1.485	0.246	0.934	120	534	4718	4751	-1.884	1006	3712	976	3775	0
3	15	6	"YKR090W"	"YKR090W"	13830	14930	120	501	550	397	92	94	25	90	85	0	1196	1419	1213	69	87	199	79	73	0	0.363	0.339	0.355	0.365	1.934	0.307	0.863	120	572	1536	1808	-1.462	409	1127	458	1350	0
3	16	6	"YLR231C"	"YLR231C"	14040	14930	120	3917	3329	1656	92	100	45	99	97	0	5030	4082	2263	69	82	72	96	95	0	0.771	0.807	0.803	0.928	1.529	0.771	0.963	120	588	8786	7250	-0.375	3825	4961	3237	4013	0
3	17	6	"RED1"	"YLR263W"	14240	14930	130	1194	1348	858	89	97	44	97	95	0	2644	3003	2136	67	81	73	93	91	0	0.429	0.429	0.452	0.510	1.770	0.409	0.953	120	613	3682	4195	-1.222	1105	2577	1259	2936	0
3	18	6	"YLR294C"	"YLR294C"	14440	14920	130	815	745	314	89	91	24	93	93	0	1825	1583	744	68	75	108	90	89	0	0.413	0.433	0.434	0.475	1.707	0.409	0.909	120	601	2483	2171	-1.275	726	1757	656	1515	0
3	19	6	"EST1"	"YLR233C"	14630	14920	130	3479	2834	1615	91	95	26	97	95	0	4648	3632	2157	71	82	112	86	83	0	0.740	0.770	0.783	0.905	2.146	0.759	0.941	120	580	7965	6304	-0.434	3388	4577	2743	3561	0
3	20	6	"YLR265C"	"YLR265C"	14830	14920	130	2658	2327	1142	90	93	26	100	99	0	3635	3063	1668	70	75	66	86	86	0	0.720	0.747	0.744	0.889	1.928	0.715	0.958	120	591	6133	5230	-0.473	2568	3565	2237	2993	0
3	21	6	"YLR296W"	"YLR296W"	15030	14910	130	237	229	76	87	90	25	92	87	0	1122	953	451	69	73	58	88	86	0	0.142	0.161	0.171	0.207	3.145	0.144	0.730	120	693	1203	1026	-2.811	150	1053	142	884	0
3	1	7	"YLR235C"	"YLR235C"	11030	15180	130	757	652	335	93	99	39	90	87	0	1714	1305	800	70	88	105	80	78	0	0.404	0.453	0.464	0.555	2.205	0.420	0.924	120	732	2308	1794	-1.308	664	1644	559	1235	0
3	2	7	"BOP2"	"YLR267W"	11270	15190	130	1182	1059	468	94	101	34	97	95	0	4019	3340	1672	72	98	114	96	93	0	0.276	0.295	0.298	0.317	1.480	0.284	0.937	120	601	5035	4233	-1.859	1088	3947	965	3268	0
3	3	7	"YHC1"	"YLR298C"	11450	15180	140	864	798	358	92	97	30	92	91	0	2937	2373	1220	70	84	65	92	91	0	0.269	0.307	0.313	0.332	1.849	0.293	0.930	156	601	3639	3009	-1.893	772	2867	706	2303	0
3	4	7	"THI7"	"YLR237W"	11650	15180	140	3393	2920	1398	91	96	32	99	98	0	6710	5281	2848	70	87	87	95	93	0	0.497	0.543	0.549	0.642	1.781	0.521	0.950	156	604	9942	8040	-1.008	3302	6640	2829	5211	0
3	5	7	"YLR269C"	"YLR269C"	11840	15170	130	501	452	196	91	96	31	90	85	0	2411	1942	1055	71	99	115	85	82	0	0.175	0.193	0.196	0.234	1.919	0.181	0.894	120	554	2750	2232	-2.513	410	2340	361	1871	0
3	6	7	"EXG1"	"YLR300W"	12050	15170	140	2411	2067	950	93	99	37	98	97	0	5135	4217	2213	72	99	111	96	90	0	0.458	0.476	0.483	0.546	1.588	0.455	0.944	156	657	7381	6119	-1.127	2318	5063	1974	4145	0
3	7	7	"MVP1"	"YMR004W"	12250	15170	130	1757	1814	1133	91	97	40	95	93	0	1482	1484	917	68	83	104	90	85	0	1.178	1.217	1.224	1.258	1.948	1.232	0.918	120	561	3080	3139	0.237	1666	1414	1723	1416	0
3	8	7	"IMP2"	"YMR035W"	12440	15160	130	1289	1254	705	89	93	27	96	93	0	1737	1772	1167	65	71	60	86	85	0	0.718	0.682	0.692	0.827	2.187	0.635	0.930	120	582	2872	2872	-0.479	1200	1672	1165	1707	0
3	9	7	"SOV1"	"YMR066W"	12640	15150	130	940	909	445	90	94	29	99	95	0	1226	1167	632	68	72	35	91	90	0	0.734	0.745	0.748	0.882	2.317	0.715	0.897	120	606	2008	1918	-0.446	850	1158	819	1099	0
3	10	7	"PLB2"	"YMR006C"	12840	15150	140	2820	3349	2752	90	93	27	99	98	0	1538	1897	1633	70	71	33	91	90	0	1.860	1.784	1.804	2.137	2.122	1.756	0.943	156	609	4198	5086	0.895	2730	1468	3259	1827	0
3	11	7	"MSN2"	"YMR037C"	13040	15150	140	1133	1011	578	93	96	31	96	94	0	2414	2118	1393	70	77	94	91	85	0	0.444	0.448	0.450	0.507	1.878	0.425	0.932	156	604	3384	2966	-1.172	1040	2344	918	2048	0
3	12	7	"YMR068W"	"YMR068W"	13230	15140	130	591	596	307	93	95	25	95	91	0	1682	1605	942	70	77	98	88	85	0	0.309	0.328	0.330	0.355	1.800	0.314	0.924	120	546	2110	2038	-1.695	498	1612	503	1535	0
3	13	7	"PLB1"	"YMR008C"	13430	15140	140	4559	3949	2332	91	103	67	98	94	0	7190	5957	4012	71	90	105	94	90	0	0.628	0.655	0.656	0.831	2.057	0.619	0.952	156	664	11587	9744	-0.672	4468	7119	3858	5886	0
3	14	7	"SUB1"	"YMR039C"	13670	15140	140	4961	4099	2156	90	96	41	98	97	0	4488	3755	2100	69	82	88	91	89	0	1.102	1.088	1.102	1.251	1.866	1.071	0.942	156	620	9290	7695	0.140	4871	4419	4009	3686	0
3	15	7	"MOT3"	"YMR070W"	13840	15130	130	1250	1093	624	92	99	45	92	90	0	4840	3909	2546	70	106	235	85	80	0	0.243	0.261	0.268	0.314	1.929	0.245	0.935	120	541	5928	4840	-2.042	1158	4770	1001	3839	0
3	16	7	"YMR010W"	"YMR010W"	14040	15130	130	2530	2152	1079	92	106	68	91	90	0	4459	3565	2005	72	117	235	86	83	0	0.556	0.590	0.583	0.676	1.957	0.558	0.932	120	616	6825	5553	-0.848	2438	4387	2060	3493	0
3	17	7	"YMR041C"	"YMR041C"	14240	15120	130	2272	1981	976	89	101	56	100	95	0	5242	4399	2357	71	108	168	94	90	0	0.422	0.437	0.446	0.503	1.867	0.420	0.951	120	614	7354	6220	-1.244	2183	5171	1892	4328	0
3	18	7	"ABF2"	"YMR072W"	14450	15120	130	995	854	420	89	98	48	94	90	0	2619	2085	1117	70	101	147	90	85	0	0.355	0.380	0.375	0.403	1.447	0.362	0.916	120	612	3455	2780	-1.492	906	2549	765	2015	0
3	19	7	"YNL046W"	"YNL046W"	14650	15120	140	1109	1134	728	93	97	30	96	93	0	3178	3263	2403	72	87	74	92	91	0	0.327	0.326	0.324	0.377	1.795	0.311	0.963	156	625	4122	4232	-1.612	1016	3106	1041	3191	0
3	20	7	"TPM1"	"YNL079C"	14850	15110	140	1805	1626	696	93	96	34	100	99	0	4839	4115	2003	72	92	122	98	96	0	0.359	0.379	0.380	0.423	1.563	0.363	0.954	156	626	6479	5576	-1.477	1712	4767	1533	4043	0
3	21	7	"CYB5"	"YNL111C"	15050	15110	130	1419	1184	640	90	97	40	89	86	0	2650	2136	1272	71	93	126	84	83	0	0.515	0.530	0.533	0.551	1.607	0.504	0.943	120	679	3908	3159	-0.956	1329	2579	1094	2065	0
3	1	8	"ALG11"	"YNL048W"	11050	15380	130	6580	5681	2151	95	123	201	98	95	0	5598	4820	1998	70	110	249	93	91	0	1.173	1.176	1.184	1.327	1.627	1.150	0.963	120	698	12013	10336	0.230	6485	5528	5586	4750	0
3	2	8	"YNL081C"	"YNL081C"	11250	15380	130	1174	1007	477	97	133	216	82	77	0	2253	1816	1001	72	130	277	80	77	0	0.494	0.522	0.533	0.620	1.823	0.494	0.937	120	613	3258	2654	-1.018	1077	2181	910	1744	0
3	3	8	"RPC19"	"YNL113W"	11470	15380	140	559	522	236	93	104	49	92	85	0	3186	2715	1430	70	99	113	91	89	0	0.150	0.162	0.165	0.186	1.919	0.157	0.914	156	656	3582	3074	-2.741	466	3116	429	2645	0
3	4	8	"YNL050C"	"YNL050C"	11680	15370	130	2515	2058	1009	91	108	84	95	90	0	3704	3080	1620	70	101	174	87	83	0	0.667	0.653	0.667	0.764	1.711	0.631	0.954	120	559	6058	4977	-0.584	2424	3634	1967	3010	0
3	5	8	"YNL083W"	"YNL083W"	11870	15360	130	2506	2047	1221	98	120	95	93	85	0	5483	4259	2822	74	146	289	80	75	0	0.445	0.466	0.477	0.603	1.931	0.447	0.966	120	591	7817	6134	-1.168	2408	5409	1949	4185	0
3	6	8	"YNL115C"	"YNL115C"	12070	15370	130	3542	2845	1783	96	111	66	94	92	0	5590	4283	2794	73	128	284	80	78	0	0.625	0.653	0.689	0.757	1.504	0.650	0.953	120	562	8963	6959	-0.679	3446	5517	2749	4210	0
3	7	8	"COX5A"	"YNL052W"	12260	15360	150	371	349	191	92	98	38	86	73	0	1956	1642	1116	70	93	105	85	80	0	0.148	0.163	0.164	0.183	2.296	0.158	0.864	156	662	2165	1829	-2.757	279	1886	257	1572	0
3	8	8	"MKT1"	"YNL085W"	12480	15360	140	4374	3936	2263	90	93	27	98	96	0	4796	4402	2596	67	80	72	94	91	0	0.906	0.887	0.906	0.983	1.830	0.880	0.958	156	626	9013	8181	-0.143	4284	4729	3846	4335	0
3	9	8	"MLS1"	"YNL117W"	12670	15360	130	2547	2120	998	89	93	27	97	95	0	5336	4222	2111	66	78	132	90	88	0	0.466	0.489	0.496	0.561	1.740	0.476	0.952	120	521	7728	6187	-1.100	2458	5270	2031	4156	0
3	10	8	"YOL015W"	"YOL015W"	12850	15350	140	928	974	603	91	95	28	96	91	0	1044	1080	760	69	78	124	83	77	0	0.858	0.873	0.883	1.039	1.838	0.830	0.930	156	606	1812	1894	-0.220	837	975	883	1011	0
3	11	8	"YOL047C"	"YOL047C"	13050	15340	130	3426	3102	1149	94	113	71	100	100	0	3339	2862	1179	71	93	90	98	97	0	1.020	1.078	1.083	1.151	1.445	1.060	0.953	120	589	6600	5799	0.028	3332	3268	3008	2791	0
3	12	8	"YOL079W"	"YOL079W"	13270	15340	140	465	487	275	93	110	70	87	76	0	606	607	396	72	93	83	82	75	0	0.697	0.736	0.732	0.748	2.091	0.707	0.881	156	625	906	929	-0.522	372	534	394	535	0
3	13	8	"YOL017W"	"YOL017W"	13460	15340	140	5035	4074	2339	91	95	33	100	98	0	6120	4700	2835	72	78	52	98	94	0	0.817	0.861	0.870	1.003	1.924	0.845	0.955	156	606	10992	8611	-0.291	4944	6048	3983	4628	0
3	14	8	"GSH2"	"YOL049W"	13660	15330	130	787	908	706	89	94	29	95	94	0	1282	1490	1303	71	77	78	87	82	0	0.576	0.577	0.600	0.647	1.936	0.540	0.911	120	526	1909	2238	-0.795	698	1211	819	1419	0
3	15	8	"IRA2"	"YOL081W"	13840	15330	120	193	258	170	92	100	62	75	40	0	296	403	379	71	99	204	55	21	0	0.449	0.500	0.524	0.522	2.202	0.440	0.806	120	561	326	498	-1.156	101	225	166	332	0
3	16	8	"YOL019W"	"YOL019W"	14070	15330	130	3224	2774	1461	94	99	54	99	98	0	6868	5605	3030	72	83	98	96	90	0	0.461	0.484	0.502	0.578	1.898	0.479	0.942	120	626	9926	8213	-1.119	3130	6796	2680	5533	0
3	17	8	"GAL11"	"YOL051W"	14250	15320	130	3477	3259	1643	93	101	48	99	97	0	8387	7894	4264	73	98	125	100	97	0	0.407	0.405	0.397	0.415	1.322	0.392	0.957	120	598	11698	10987	-1.297	3384	8314	3166	7821	0
3	18	8	"YOL083W"	"YOL083W"	14460	15320	130	1893	1608	820	90	95	31	97	94	0	4659	3808	2044	71	80	53	96	93	0	0.393	0.406	0.424	0.448	1.540	0.394	0.938	120	612	6391	5255	-1.347	1803	4588	1518	3737	0
3	19	8	"DIS3"	"YOL021C"	14660	15310	130	6876	5590	3009	90	100	62	100	98	0	7578	6539	3650	71	90	112	95	93	0	0.904	0.850	0.853	0.928	1.405	0.833	0.956	120	594	14293	11968	-0.146	6786	7507	5500	6468	0
3	20	8	"YOL053C-A"	"YOL053C-A"	14870	15310	130	515	486	216	93	103	65	89	84	0	2138	1685	927	72	105	180	85	80	0	0.204	0.244	0.252	0.281	1.743	0.223	0.861	120	597	2488	2006	-2.292	422	2066	393	1613	0
3	21	8	"YOL085C"	"YOL085C"	15060	15310	130	267	268	93	89	94	45	91	83	0	864	747	345	70	89	144	87	81	0	0.224	0.264	0.265	0.278	1.997	0.214	0.680	120	668	972	856	-2.157	178	794	179	677	0
3	1	9	"KIN4"	"YOR233W"	11070	15580	130	1013	980	563	92	117	205	83	76	0	1174	1191	760	69	106	304	81	70	0	0.833	0.791	0.804	0.792	1.641	0.720	0.826	120	650	2026	2010	-0.263	921	1105	888	1122	0
3	2	9	"RBL2"	"YOR265W"	11240	15580	130	335	309	133	93	108	65	80	70	0	1471	1219	616	70	104	127	89	83	0	0.173	0.188	0.192	0.192	1.978	0.186	0.855	120	597	1643	1365	-2.533	242	1401	216	1149	0
3	3	9	"TIM18"	"YOR297C"	11460	15580	130	377	368	160	91	95	28	94	89	0	1971	1693	785	70	90	93	91	90	0	0.150	0.171	0.162	0.188	2.012	0.170	0.846	120	592	2187	1900	-2.733	286	1901	277	1623	0
3	4	9	"SNR17A"	"YOR235W"	11650	15570	130	348	336	146	93	104	66	81	75	0	1784	1462	790	72	99	132	86	84	0	0.149	0.175	0.188	0.199	1.992	0.166	0.855	120	634	1967	1633	-2.747	255	1712	243	1390	0
3	5	9	"YOR267C"	"YOR267C"	11860	15570	120	1992	2053	1093	93	102	54	99	95	0	5240	5288	3034	73	116	245	90	87	0	0.368	0.376	0.390	0.436	1.716	0.361	0.955	120	539	7066	7175	-1.444	1899	5167	1960	5215	0
3	6	9	"BUD7"	"YOR299W"	12050	15570	130	820	753	393	90	98	38	90	85	0	1504	1346	807	72	107	260	82	75	0	0.510	0.520	0.499	0.522	1.576	0.437	0.790	120	578	2162	1937	-0.972	730	1432	663	1274	0
3	7	9	"HES1"	"YOR237W"	12260	15560	130	799	721	372	91	95	32	92	90	0	2055	1867	1128	70	82	68	88	88	0	0.357	0.351	0.340	0.397	1.859	0.334	0.945	120	646	2693	2427	-1.487	708	1985	630	1797	0
3	8	9	"PAC1"	"YOR269W"	12460	15560	140	2370	2289	1208	91	93	25	98	98	0	4247	3689	2129	68	78	66	92	90	0	0.545	0.607	0.599	0.719	1.854	0.587	0.950	156	656	6458	5819	-0.875	2279	4179	2198	3621	0
3	9	9	"RAX1"	"YOR301W"	12660	15550	130	432	412	199	90	93	26	92	88	0	932	874	537	68	80	129	83	75	0	0.396	0.400	0.412	0.466	2.260	0.352	0.842	120	550	1206	1128	-1.337	342	864	322	806	0
3	10	9	"YOR239W"	"YOR239W"	12860	15550	130	1109	1066	639	92	96	27	97	96	0	2486	2262	1456	70	83	133	88	85	0	0.421	0.444	0.456	0.544	2.168	0.429	0.942	120	588	3433	3166	-1.248	1017	2416	974	2192	0
3	11	9	"YOR271C"	"YOR271C"	13070	15550	130	1254	1321	663	92	104	58	97	93	0	1529	1603	821	69	84	85	91	91	0	0.796	0.801	0.785	0.866	1.604	0.791	0.959	120	612	2622	2763	-0.329	1162	1460	1229	1534	0
3	12	9	"CPA1"	"YOR303W"	13270	15540	130	1173	967	558	90	94	30	90	87	0	2851	2290	1464	71	75	39	88	86	0	0.390	0.395	0.402	0.428	1.672	0.384	0.957	120	588	3863	3096	-1.360	1083	2780	877	2219	0
3	13	9	"YPL222W"	"YPL222W"	13450	15540	130	2019	1778	772	93	98	29	100	98	0	5365	4637	2230	75	86	69	93	91	0	0.364	0.369	0.377	0.428	1.638	0.359	0.976	120	538	7216	6247	-1.458	1926	5290	1685	4562	0
3	14	9	"HFI1"	"YPL254W"	13660	15530	130	1894	1638	723	93	101	53	97	95	0	4564	3797	1787	74	95	122	95	95	0	0.401	0.415	0.426	0.447	1.510	0.406	0.971	120	685	6291	5268	-1.318	1801	4490	1545	3723	0
3	15	9	"YPR003C"	"YPR003C"	13870	15530	130	4084	4175	2325	94	103	58	98	96	0	3835	3827	2267	74	92	145	94	91	0	1.061	1.087	1.084	1.186	1.447	1.063	0.978	120	598	7751	7834	0.085	3990	3761	4081	3753	0
3	16	9	"MMT2"	"YPL224C"	14060	15530	130	1675	1407	663	93	97	32	96	93	0	5725	4514	2307	73	78	97	94	91	0	0.280	0.296	0.295	0.325	1.478	0.288	0.958	120	568	7234	5755	-1.837	1582	5652	1314	4441	0
3	17	9	"CLN2"	"YPL256C"	14250	15520	120	2836	2454	1141	91	101	45	100	97	0	6326	5333	2711	74	98	91	95	93	0	0.439	0.449	0.448	0.534	1.732	0.433	0.971	120	530	8997	7622	-1.188	2745	6252	2363	5259	0
3	18	9	"HAL1"	"YPR005C"	14460	15520	140	6284	5194	2994	92	105	59	98	97	0	4392	3673	2247	75	99	103	92	91	0	1.434	1.418	1.441	1.668	1.672	1.404	0.974	156	635	10509	8700	0.520	6192	4317	5102	3598	0
3	19	9	"YPL226W"	"YPL226W"	14650	15510	130	2426	2407	1291	91	105	73	96	95	0	5691	5451	3217	73	89	98	95	93	0	0.416	0.431	0.439	0.515	1.859	0.416	0.970	120	619	7953	7694	-1.267	2335	5618	2316	5378	0
3	20	9	"THI21"	"YPL258C"	14890	15510	130	2527	2281	818	91	97	44	100	100	0	5814	5101	1985	73	86	116	100	98	0	0.424	0.436	0.442	0.457	1.286	0.429	0.972	120	643	8177	7218	-1.237	2436	5741	2190	5028	0
3	21	9	"SPO69"	"YPR007C"	15080	15510	130	2034	1792	993	89	94	42	95	94	0	5782	4639	2727	71	74	40	93	90	0	0.341	0.373	0.378	0.427	1.717	0.368	0.968	120	640	7656	6271	-1.554	1945	5711	1703	4568	0
3	1	10	"CET1"	"YPL228W"	11050	15780	130	3504	3152	1840	92	110	102	93	91	0	4963	4219	2736	71	114	274	87	84	0	0.697	0.738	0.736	0.837	1.825	0.690	0.936	120	718	8304	7208	-0.520	3412	4892	3060	4148	0
3	2	10	"YPL260W"	"YPL260W"	11260	15780	120	3584	3035	1405	93	121	115	97	92	0	5651	4507	2264	71	135	249	91	88	0	0.626	0.663	0.664	0.734	1.513	0.637	0.935	120	588	9071	7378	-0.677	3491	5580	2942	4436	0
3	3	10	"YPR009W"	"YPR009W"	11480	15780	140	2305	2025	915	94	103	45	98	96	0	2526	2111	1074	71	91	100	91	90	0	0.901	0.947	0.939	1.100	1.782	0.917	0.942	156	733	4666	3971	-0.151	2211	2455	1931	2040	0
3	4	10	"LTE1"	"YAL024C"	11710	15770	110	613	705	569	95	101	34	96	92	0	623	936	829	73	84	56	90	82	0	0.942	0.707	0.703	0.734	1.788	0.673	0.852	80	447	1068	1473	-0.086	518	550	610	863	0
3	5	10	"PEP1"	"YBL017C"	11850	15760	150	114	181	195	91	97	32	41	28	0	90	217	375	72	85	60	25	19	0	1.278	0.621	0.938	1.015	3.667	0.461	0.626	156	641	41	235	0.354	23	18	90	145	-50
3	6	10	"ENA2"	"YDR039C"	12050	15760	150	104	134	124	89	92	25	35	20	0	79	129	214	68	74	44	21	13	0	1.364	0.738	0.836	0.866	3.117	0.451	0.626	156	759	26	106	0.447	15	11	45	61	-50
3	7	10	"YFL019C"	"YFL019C"	12310	15770	80	157	299	318	92	92	23	71	57	0	195	455	654	68	68	24	75	63	0	0.512	0.535	0.476	0.583	2.764	0.461	0.758	52	336	192	594	-0.966	65	127	207	387	-100
3	8	10	"YGL066W"	"YGL066W"	12490	15750	80	159	203	130	91	93	23	71	63	0	149	252	227	69	69	43	63	48	0	0.850	0.612	0.614	0.742	2.876	0.554	0.754	52	280	148	295	-0.234	68	80	112	183	-100
3	9	10	"MNT2"	"YGL257C"	12650	15750	150	107	156	149	92	95	28	37	27	0	84	167	267	68	71	32	35	23	0	0.938	0.646	0.856	0.883	3.063	0.489	0.721	156	694	31	163	-0.093	15	16	64	99	-100
3	10	10	"YHR032W"	"YHR032W"	12850	15750	150	107	180	242	93	95	26	37	23	0	77	224	488	69	74	61	21	16	0	1.750	0.561	0.869	0.848	3.234	0.494	0.864	156	648	22	242	0.807	14	8	87	155	-100
3	11	10	"YHR036W"	"YHR036W"	13050	15740	150	97	126	109	93	95	26	27	17	0	78	157	250	69	73	58	20	17	0	0.444	0.375	0.700	0.706	3.667	0.229	0.371	156	744	13	121	-1.170	4	9	33	88	-100
3	12	10	"YHR045W"	"YHR045W"	13280	15740	80	122	164	97	87	90	24	65	44	0	113	185	160	68	68	21	63	50	0	0.778	0.658	0.630	0.681	2.563	0.591	0.626	52	305	80	194	-0.363	35	45	77	117	-100
3	13	10	"STT4"	"YLR305C"	13450	15730	150	106	142	113	92	95	28	39	26	0	84	144	182	72	79	57	23	14	0	1.167	0.694	0.830	0.975	3.242	0.572	0.689	156	806	26	122	0.222	14	12	50	72	-100
3	14	10	"YLR422W"	"YLR422W"	13700	15730	90	151	218	182	90	94	30	71	50	0	130	311	418	72	111	580	11	7	0	1.052	0.536	0.676	0.607	3.154	0.037	0.063	52	333	119	367	0.073	61	58	128	239	-100
3	15	10	"YML072C"	"YML072C"	13850	15730	150	96	102	39	90	100	52	9	3	0	74	86	64	71	99	399	0	0	0	2.000	0.800	0.855	0.825	3.624	0.416	0.328	156	749	9	27	1.000	6	3	12	15	-50
3	16	10	"SNR54"	"SNR54"	14080	15720	130	348	331	158	89	93	25	91	84	0	632	542	306	71	72	29	90	85	0	0.462	0.514	0.492	0.532	1.881	0.493	0.880	120	607	820	713	-1.115	259	561	242	471	0
3	17	10	"YMR046W-A"	"YMR046W-A"	14280	15720	140	3920	3534	2306	91	99	41	94	94	0	4733	4182	2941	75	91	88	85	83	0	0.822	0.838	0.836	1.021	2.067	0.811	0.960	156	675	8487	7550	-0.283	3829	4658	3443	4107	0
3	18	10	"YMRWdelta16"	"YMRWdelta16"	14500	15720	140	976	847	483	91	99	52	89	84	0	1415	1162	719	72	82	75	83	78	0	0.659	0.694	0.688	0.730	1.725	0.668	0.914	156	574	2228	1846	-0.602	885	1343	756	1090	0
3	19	10	"YNRCdelta9"	"YNRCdelta9"	14660	15710	130	368	334	151	89	97	44	85	79	0	881	759	452	72	79	50	87	85	0	0.345	0.357	0.368	0.377	2.064	0.314	0.783	120	560	1088	932	-1.536	279	809	245	687	0
3	20	10	"SNR50"	"SNR50"	14880	15710	120	219	207	84	90	93	27	81	75	0	550	461	254	72	76	48	79	77	0	0.270	0.301	0.316	0.340	2.019	0.288	0.765	120	555	607	506	-1.890	129	478	117	389	0
3	21	10	"tR(ACG)O"	"tR(ACG)O"	15060	15700	120	225	221	83	89	92	27	90	83	0	342	318	149	71	74	37	89	82	0	0.502	0.534	0.536	0.559	2.232	0.517	0.715	120	580	407	379	-0.995	136	271	132	247	0
3	1	11	"YPLCdelta1"	"YPLCdelta1"	11090	15980	130	382	365	150	91	108	101	80	66	0	1094	958	530	70	99	203	85	75	0	0.284	0.309	0.319	0.324	1.880	0.211	0.603	120	681	1315	1162	-1.815	291	1024	274	888	0
3	2	11	"YPL183W-A"	"YPL183W-A"	11280	15980	130	374	353	181	90	100	58	76	72	0	946	737	437	70	88	90	77	74	0	0.324	0.394	0.381	0.399	1.749	0.374	0.851	120	615	1160	930	-1.625	284	876	263	667	0
3	3	11	"IntYPL143W"	"IntYPL143W"	11500	15980	140	1100	963	536	93	99	53	91	87	0	2678	2166	1381	71	79	74	89	85	0	0.386	0.415	0.422	0.486	1.798	0.399	0.921	156	622	3614	2965	-1.372	1007	2607	870	2095	0
3	4	11	"tC(GCA)P2"	"tC(GCA)P2"	11670	15970	120	163	160	57	93	97	31	74	55	0	316	278	148	72	76	37	81	74	0	0.287	0.325	0.332	0.342	2.191	0.316	0.619	120	495	314	273	-1.801	70	244	67	206	0
3	5	11	"tN(GUU)P"	"tN(GUU)P"	11880	15970	140	5997	4968	3153	90	94	30	98	95	0	7608	6068	4091	71	76	49	94	91	0	0.784	0.813	0.819	0.970	1.805	0.797	0.957	156	579	13444	10875	-0.352	5907	7537	4878	5997	0
3	6	11	"tI(AAU)P2"	"tI(AAU)P2"	12090	15970	140	731	678	277	90	94	31	98	94	0	1333	1173	559	68	75	60	93	92	0	0.507	0.532	0.543	0.569	1.512	0.512	0.934	156	617	1906	1693	-0.981	641	1265	588	1105	0
3	7	11	"itL(UAA)B2"	"itL(UAA)B2"	12280	15960	130	322	305	151	90	92	27	84	76	0	1252	989	612	68	71	40	85	82	0	0.196	0.233	0.237	0.250	1.902	0.226	0.861	120	585	1416	1136	-2.351	232	1184	215	921	0
3	8	11	"iYBR057C"	"iYBR057C"	12480	15960	140	3673	3036	1887	92	97	37	97	97	0	6382	5188	3502	71	81	64	94	90	0	0.567	0.575	0.577	0.670	1.844	0.556	0.970	156	727	9892	8061	-0.818	3581	6311	2944	5117	0
3	9	11	"iYBR060C-1"	"iYBR060C-1"	12700	15950	110	250	309	229	92	98	39	73	68	0	311	438	436	69	79	64	72	61	0	0.653	0.588	0.630	0.704	2.276	0.514	0.823	80	492	400	586	-0.615	158	242	217	369	0
3	10	11	"iYBR077C"	"iYBR077C"	12880	15950	130	718	648	321	93	94	24	90	89	0	2232	1861	1006	69	74	77	87	86	0	0.289	0.310	0.311	0.342	1.948	0.301	0.924	120	574	2788	2347	-1.791	625	2163	555	1792	0
3	11	11	"iYBR081C"	"iYBR081C"	13070	15940	130	414	399	185	91	93	24	90	87	0	1838	1611	912	70	75	61	89	87	0	0.183	0.200	0.203	0.227	1.813	0.189	0.878	120	596	2091	1849	-2.453	323	1768	308	1541	0
3	12	11	"iYBR083W"	"iYBR083W"	13270	15940	130	2018	1866	792	90	95	29	100	100	0	2599	2249	1048	71	82	122	96	94	0	0.763	0.815	0.817	0.874	1.383	0.792	0.965	120	679	4456	3954	-0.391	1928	2528	1776	2178	0
3	13	11	"iYBR097W"	"iYBR097W"	13490	15930	130	423	380	207	92	97	30	84	79	0	942	754	488	74	79	39	80	77	0	0.381	0.424	0.414	0.438	2.382	0.410	0.887	120	643	1199	968	-1.391	331	868	288	680	0
3	14	11	"iYBR103W"	"iYBR103W"	13690	15930	130	800	721	323	90	94	26	97	94	0	1690	1469	696	74	99	430	82	77	0	0.439	0.452	0.446	0.487	1.616	0.443	0.928	120	618	2326	2026	-1.187	710	1616	631	1395	0
3	15	11	"iYBR107C"	"iYBR107C"	13880	15930	130	860	801	316	88	92	26	98	96	0	2162	1849	775	72	77	69	98	95	0	0.369	0.401	0.405	0.411	1.425	0.387	0.927	120	564	2862	2490	-1.437	772	2090	713	1777	0
3	16	11	"iYBR126C"	"iYBR126C"	14080	15920	130	1322	1160	609	91	97	48	89	89	0	2347	1984	1160	73	86	120	85	83	0	0.541	0.559	0.556	0.617	1.748	0.536	0.942	120	659	3505	2980	-0.885	1231	2274	1069	1911	0
3	17	11	"iYBR130C"	"iYBR130C"	14300	15920	130	408	387	157	94	101	50	88	84	0	1626	1368	668	74	104	361	85	75	0	0.202	0.226	0.230	0.247	1.669	0.216	0.901	120	606	1866	1587	-2.305	314	1552	293	1294	0
3	18	11	"iYBR135W"	"iYBR135W"	14490	15920	130	1200	1088	607	91	94	28	95	90	0	2237	1952	1139	72	92	360	81	75	0	0.512	0.530	0.536	0.565	1.654	0.474	0.841	120	540	3274	2877	-0.965	1109	2165	997	1880	0
3	19	11	"iYDL248W-0"	"iYDL248W-0"	14680	15910	130	753	738	308	89	93	28	98	97	0	1225	1185	524	72	74	38	95	95	0	0.576	0.583	0.572	0.617	1.617	0.564	0.922	120	590	1817	1762	-0.796	664	1153	649	1113	0
3	20	11	"iYDL246C-1"	"iYDL246C-1"	14880	15910	130	403	423	182	88	91	26	95	91	0	1252	1231	626	72	74	46	96	94	0	0.267	0.289	0.290	0.307	1.469	0.277	0.894	120	628	1495	1494	-1.905	315	1180	335	1159	0
3	21	11	"iYDL243C"	"iYDL243C"	15090	15900	130	682	649	299	89	91	24	95	93	0	1934	1681	892	71	75	43	95	92	0	0.318	0.348	0.340	0.373	1.724	0.334	0.928	120	703	2456	2170	-1.652	593	1863	560	1610	0
3	1	12	"iYDL227C-0"	"iYDL227C-0"	11090	16180	130	550	520	265	88	91	27	90	90	0	2324	1946	1211	70	73	36	90	87	0	0.205	0.230	0.231	0.283	2.020	0.215	0.904	120	707	2716	2308	-2.287	462	2254	432	1876	0
3	2	12	"iYDL225W"	"iYDL225W"	11310	16180	130	1577	1461	673	89	95	52	97	95	0	1888	1720	858	71	77	42	92	89	0	0.819	0.832	0.839	0.910	1.577	0.810	0.954	120	644	3305	3021	-0.288	1488	1817	1372	1649	0
3	3	12	"iYDL220C"	"iYDL220C"	11510	16170	130	1174	1060	436	92	97	54	100	99	0	1340	1121	515	71	74	33	98	98	0	0.853	0.922	0.917	1.012	1.474	0.898	0.947	120	570	2351	2018	-0.230	1082	1269	968	1050	0
3	4	12	"iYDL207W"	"iYDL207W"	11730	16160	150	650	569	330	92	96	29	85	79	0	1899	1575	1033	75	78	35	84	82	0	0.306	0.318	0.324	0.370	1.925	0.310	0.941	156	602	2382	1977	-1.709	558	1824	477	1500	0
3	5	12	"iYDL203C"	"iYDL203C"	11900	16170	140	290	285	112	91	94	29	93	85	0	1476	1351	720	72	78	55	93	91	0	0.142	0.152	0.151	0.170	1.988	0.142	0.842	156	509	1603	1473	-2.819	199	1404	194	1279	0
3	6	12	"iYDL199C"	"iYDL199C"	12090	16160	130	232	234	76	91	93	28	92	86	0	934	826	334	69	71	48	91	91	0	0.163	0.189	0.193	0.202	1.901	0.177	0.733	120	526	1006	900	-2.617	141	865	143	757	0
3	7	12	"iYDL183C-1"	"iYDL183C-1"	12280	16160	130	1716	1500	684	90	94	29	95	91	0	4463	3913	1948	70	74	40	91	90	0	0.370	0.367	0.365	0.389	1.522	0.355	0.960	120	577	6019	5253	-1.434	1626	4393	1410	3843	0
3	8	12	"iYDL179W"	"iYDL179W"	12470	16150	130	1048	935	430	90	95	37	95	89	0	1621	1384	699	72	80	54	89	88	0	0.618	0.644	0.651	0.677	1.656	0.623	0.947	120	561	2507	2157	-0.693	958	1549	845	1312	0
3	9	12	"iYDL175C"	"iYDL175C"	12670	16150	130	948	897	393	91	97	37	95	95	0	1547	1396	649	71	80	61	94	90	0	0.581	0.608	0.606	0.631	1.744	0.591	0.936	120	618	2333	2131	-0.784	857	1476	806	1325	0
3	10	12	"iYDR127W"	"iYDR127W"	12860	16150	130	778	739	296	92	96	25	95	95	0	1156	1009	482	70	76	82	90	89	0	0.632	0.689	0.694	0.760	1.716	0.643	0.884	120	613	1772	1586	-0.663	686	1086	647	939	0
3	11	12	"iYDR131C"	"iYDR131C"	13080	16150	130	472	454	156	92	93	24	95	94	0	1532	1403	601	70	82	131	90	89	0	0.260	0.272	0.267	0.289	1.608	0.250	0.866	120	647	1842	1695	-1.944	380	1462	362	1333	0
3	12	12	"iYDR137W"	"iYDR137W"	13280	16140	130	258	247	98	88	93	27	87	81	0	1276	1055	559	72	82	127	83	79	0	0.141	0.162	0.164	0.172	1.941	0.142	0.746	120	594	1374	1142	-2.824	170	1204	159	983	0
3	13	12	"iYDR155C"	"iYDR155C"	13480	16140	130	338	322	122	91	94	25	90	88	0	1195	1064	509	75	81	81	88	86	0	0.221	0.234	0.229	0.245	2.093	0.193	0.751	120	578	1367	1220	-2.181	247	1120	231	989	0
3	14	12	"iYDR161W"	"iYDR161W"	13660	16130	130	639	563	236	92	95	28	91	88	0	2052	1736	825	75	89	104	89	86	0	0.277	0.284	0.288	0.299	1.923	0.274	0.911	120	578	2524	2132	-1.854	547	1977	471	1661	0
3	15	12	"iYDR165W"	"iYDR165W"	13880	16130	140	588	545	269	90	94	28	91	85	0	972	812	423	74	83	78	87	82	0	0.555	0.617	0.620	0.597	1.798	0.603	0.899	156	647	1396	1193	-0.851	498	898	455	738	0
3	16	12	"iYDR177W"	"iYDR177W"	14070	16130	130	1230	1153	471	90	95	34	95	95	0	1967	1790	801	73	82	111	91	90	0	0.602	0.619	0.618	0.664	1.545	0.600	0.937	120	541	3034	2780	-0.732	1140	1894	1063	1717	0
3	17	12	"iYDR180W"	"iYDR180W"	14260	16120	130	303	287	116	92	97	34	85	81	0	1047	872	422	75	85	106	84	80	0	0.217	0.245	0.247	0.255	1.957	0.238	0.850	120	600	1183	992	-2.204	211	972	195	797	0
3	18	12	"iYDR184C"	"iYDR184C"	14470	16110	130	1225	1140	546	95	99	29	93	90	0	1458	1216	627	76	92	343	83	75	0	0.818	0.917	0.921	0.935	1.832	0.875	0.909	120	591	2512	2185	-0.290	1130	1382	1045	1140	0
3	19	12	"iYDR204W"	"iYDR204W"	14660	16110	130	746	683	290	94	100	36	95	93	0	1514	1295	639	74	83	56	91	90	0	0.453	0.482	0.476	0.511	1.711	0.456	0.925	120	612	2092	1810	-1.143	652	1440	589	1221	0
3	20	12	"iYDR208W"	"iYDR208W"	14880	16110	130	728	682	303	89	94	33	92	90	0	1718	1500	705	71	85	77	90	89	0	0.388	0.415	0.416	0.433	1.854	0.403	0.928	120	608	2286	2022	-1.366	639	1647	593	1429	0
3	21	12	"itI(UAU)D"	"itI(UAU)D"	15070	16110	130	611	575	284	87	91	28	92	89	0	1305	1116	612	70	76	57	89	85	0	0.424	0.467	0.456	0.490	1.716	0.455	0.921	120	680	1759	1534	-1.237	524	1235	488	1046	0
3	1	13	"iYDR521W"	"iYDR521W"	11110	16380	140	346	343	156	89	92	26	94	90	0	1778	1507	874	71	79	87	91	87	0	0.151	0.177	0.180	0.197	1.852	0.167	0.880	156	725	1964	1690	-2.732	257	1707	254	1436	0
3	2	13	"iYDR525W"	"iYDR525W"	11290	16380	130	253	270	144	90	92	28	86	81	0	963	973	589	72	85	121	88	82	0	0.183	0.200	0.184	0.208	1.935	0.173	0.636	120	524	1054	1081	-2.451	163	891	180	901	0
3	3	13	"iYDR528W"	"iYDR528W"	11490	16380	140	646	605	356	92	95	28	92	84	0	1609	1382	924	71	77	90	84	79	0	0.360	0.391	0.408	0.462	2.095	0.379	0.937	156	590	2092	1824	-1.473	554	1538	513	1311	0
3	4	13	"iYDR541C-0"	"iYDR541C-0"	11660	16370	130	2067	2624	1932	95	101	32	93	91	0	1943	2379	1808	74	79	35	87	87	0	1.055	1.097	1.112	1.093	1.461	1.082	0.974	120	536	3841	4834	0.077	1972	1869	2529	2305	0
3	5	13	"iYDR544C"	"iYDR544C"	11880	16370	140	13496	11511	6962	94	107	90	98	96	0	25099	20297	12565	74	96	196	97	94	0	0.536	0.565	0.569	0.600	1.471	0.559	0.983	156	597	38427	31640	-0.901	13402	25025	11417	20223	0
3	6	13	"iYEL073C-0"	"iYEL073C-0"	12070	16360	130	395	368	199	93	104	91	72	63	0	808	662	422	72	92	199	69	65	0	0.410	0.466	0.494	0.528	1.913	0.473	0.867	120	574	1038	865	-1.285	302	736	275	590	0
3	7	13	"iYEL063C"	"iYEL063C"	12280	16360	130	570	519	283	93	96	27	86	85	0	3192	2578	1580	73	79	39	88	87	0	0.153	0.170	0.173	0.189	1.806	0.167	0.924	120	595	3596	2931	-2.709	477	3119	426	2505	0
3	8	13	"iYEL059W"	"iYEL059W"	12470	16350	130	395	387	227	93	96	29	83	77	0	1458	1364	997	72	84	57	82	81	0	0.218	0.228	0.226	0.248	1.712	0.219	0.923	120	616	1688	1586	-2.198	302	1386	294	1292	0
3	9	13	"iYEL055C"	"iYEL055C"	12680	16350	130	2568	2245	1213	91	97	33	93	90	0	2704	2288	1280	71	83	62	89	89	0	0.941	0.972	0.971	0.958	1.509	0.957	0.972	120	609	5110	4371	-0.088	2477	2633	2154	2217	0
3	10	13	"iYEL042W"	"iYEL042W"	12890	16350	140	1649	1492	930	93	97	30	91	89	0	3635	3293	2189	71	81	79	90	87	0	0.437	0.434	0.443	0.448	1.781	0.426	0.960	156	694	5120	4621	-1.196	1556	3564	1399	3222	0
3	11	13	"iYEL038W"	"iYEL038W"	13110	16340	130	343	326	155	92	97	62	78	74	0	1224	1008	626	71	86	161	76	74	0	0.218	0.250	0.261	0.269	1.779	0.236	0.820	120	577	1404	1171	-2.200	251	1153	234	937	0
3	12	13	"itS(AGA)E"	"itS(AGA)E"	13300	16340	140	430	397	185	89	95	60	83	79	0	1211	1028	575	72	81	144	83	78	0	0.299	0.322	0.326	0.340	1.807	0.307	0.900	156	602	1480	1264	-1.740	341	1139	308	956	0
3	13	13	"iYFL044C"	"iYFL044C"	13470	16330	130	782	681	358	91	106	96	88	79	0	1263	1073	623	74	99	151	85	80	0	0.581	0.591	0.585	0.633	1.787	0.575	0.937	120	527	1880	1589	-0.783	691	1189	590	999	0
3	14	13	"iYFL039C"	"iYFL039C"	13680	16330	140	1368	1179	699	94	108	90	89	83	0	3179	2695	1811	75	105	154	85	82	0	0.410	0.414	0.417	0.486	1.875	0.394	0.953	156	644	4378	3705	-1.285	1274	3104	1085	2620	0
3	15	13	"iYFL035C-A"	"iYFL035C-A"	13870	16320	130	793	657	342	94	103	41	90	85	0	1264	947	582	74	92	75	84	79	0	0.587	0.645	0.655	0.741	1.716	0.622	0.931	120	559	1889	1436	-0.768	699	1190	563	873	0
3	16	13	"iYFL020C"	"iYFL020C"	14080	16320	140	2088	1868	918	95	102	41	98	96	0	2729	2351	1209	73	89	80	95	93	0	0.750	0.778	0.785	0.805	1.547	0.770	0.967	156	619	4649	4051	-0.414	1993	2656	1773	2278	0
3	17	13	"iYFL017C"	"iYFL017C"	14290	16320	140	404	370	165	91	97	32	89	82	0	575	481	256	74	80	61	83	78	0	0.625	0.686	0.681	0.710	1.977	0.643	0.854	156	612	814	686	-0.679	313	501	279	407	0
3	18	13	"iYFL013W-A"	"iYFL013W-A"	14500	16320	140	659	583	275	92	97	28	95	89	0	1512	1225	624	74	76	56	91	88	0	0.394	0.427	0.438	0.459	1.777	0.421	0.930	156	616	2005	1642	-1.343	567	1438	491	1151	0
3	19	13	"iYFR001W"	"iYFR001W"	14680	16310	130	2650	2516	1360	94	104	48	98	97	0	1138	1095	625	76	85	76	89	85	0	2.407	2.377	2.331	2.611	1.583	2.165	0.696	120	535	3618	3441	1.267	2556	1062	2422	1019	0
3	20	13	"iYFR005C"	"iYFR005C"	14880	16310	140	3274	2846	1395	93	108	76	98	95	0	1444	1197	598	74	85	68	92	89	0	2.322	2.451	2.480	2.650	1.494	2.446	0.954	156	637	4551	3876	1.215	3181	1370	2753	1123	0
3	21	13	"iYFR007W"	"iYFR007W"	15080	16300	130	882	741	397	93	109	80	84	81	0	1806	1374	834	73	92	104	83	80	0	0.455	0.498	0.502	0.561	1.912	0.469	0.897	120	660	2522	1949	-1.135	789	1733	648	1301	0
3	1	14	"iYFR019W"	"iYFR019W"	11100	16580	140	1206	1054	593	89	92	26	96	96	0	752	618	358	70	78	94	81	73	0	1.638	1.761	1.769	1.840	1.860	1.738	0.903	156	746	1799	1513	0.712	1117	682	965	548	0
3	2	14	"iYFR021W"	"iYFR021W"	11300	16580	140	844	743	367	90	93	28	93	91	0	2091	1677	884	71	82	116	90	87	0	0.373	0.407	0.412	0.419	1.712	0.395	0.926	156	563	2774	2259	-1.422	754	2020	653	1606	0
3	3	14	"iYFR025C"	"iYFR025C"	11500	16580	140	161	166	66	90	92	24	78	64	0	304	270	133	69	74	92	75	64	0	0.302	0.378	0.335	0.354	2.492	0.365	0.566	156	541	306	277	-1.727	71	235	76	201	0
3	4	14	"iYGL013C"	"iYGL013C"	11700	16570	150	2219	1894	1177	93	98	32	91	89	0	4019	3281	2168	71	79	72	88	85	0	0.539	0.561	0.566	0.626	1.986	0.547	0.955	156	607	6074	5011	-0.893	2126	3948	1801	3210	0
3	5	14	"iYGL009C"	"iYGL009C"	11900	16570	140	5795	4634	2495	95	108	93	95	91	0	5871	4658	2703	71	95	204	87	84	0	0.983	0.990	0.993	1.069	1.736	0.965	0.957	156	563	11500	9126	-0.025	5700	5800	4539	4587	0
3	6	14	"iYGL006W"	"iYGL006W"	12100	16570	140	4799	4266	2973	96	112	106	92	91	0	1429	1255	872	72	91	192	77	69	0	3.466	3.525	3.524	3.900	1.727	3.593	0.953	156	573	6060	5353	1.793	4703	1357	4170	1183	0
3	7	14	"iYGR011W"	"iYGR011W"	12280	16560	140	1823	1695	1041	94	107	81	91	87	0	2965	2638	1847	72	88	71	88	87	0	0.598	0.624	0.626	0.716	1.846	0.588	0.936	156	616	4622	4167	-0.743	1729	2893	1601	2566	0
3	8	14	"iYGR015C"	"iYGR015C"	12500	16550	130	1153	996	535	94	113	81	89	85	0	1247	1045	636	73	107	125	81	75	0	0.902	0.928	0.897	1.031	1.662	0.886	0.943	120	594	2233	1874	-0.149	1059	1174	902	972	0
3	9	14	"iYGR020C"	"iYGR020C"	12690	16550	140	740	704	392	94	109	74	89	81	0	1773	1590	971	74	100	115	89	85	0	0.380	0.402	0.415	0.435	1.866	0.394	0.915	156	665	2345	2126	-1.395	646	1699	610	1516	0
3	10	14	"iYGR034W"	"iYGR034W"	12910	16550	150	2109	1946	1338	93	104	47	91	89	0	1113	1156	874	74	92	93	76	71	0	1.940	1.713	1.715	2.133	2.203	1.610	0.932	156	658	3055	2935	0.956	2016	1039	1853	1082	0
3	11	14	"iYGR038W"	"iYGR038W"	13100	16540	130	484	462	282	93	105	72	85	75	0	1463	1164	648	74	94	162	86	77	0	0.281	0.339	0.340	0.373	1.803	0.511	0.694	120	561	1780	1459	-1.829	391	1389	369	1090	0
3	12	14	"iYGR039W"	"iYGR039W"	13290	16540	130	339	327	156	89	95	62	78	71	0	921	753	397	72	83	146	80	71	0	0.294	0.349	0.347	0.330	1.936	0.320	0.800	120	575	1099	919	-1.764	250	849	238	681	0
3	13	14	"iYGR055W"	"iYGR055W"	13510	16540	140	2243	2031	1347	91	104	89	87	83	0	2413	2200	1526	73	95	140	82	76	0	0.920	0.912	0.933	0.990	2.174	0.907	0.909	156	631	4492	4067	-0.121	2152	2340	1940	2127	0
3	14	14	"iYGR059W"	"iYGR059W"	13690	16530	130	273	269	121	91	95	30	84	75	0	1393	1060	642	73	83	65	86	85	0	0.138	0.180	0.184	0.203	2.285	0.172	0.820	120	567	1502	1165	-2.859	182	1320	178	987	0
3	15	14	"iYGR062C"	"iYGR062C"	13910	16530	130	250	246	111	91	97	36	79	70	0	987	823	495	71	84	65	88	78	0	0.174	0.206	0.213	0.232	2.121	0.200	0.781	120	656	1075	907	-2.526	159	916	155	752	0
3	16	14	"iYHR001W"	"iYHR001W"	14130	16520	150	2548	2206	1359	94	98	35	93	92	0	1976	1663	1074	71	80	69	85	82	0	1.288	1.327	1.331	1.453	1.953	1.324	0.910	156	590	4359	3704	0.365	2454	1905	2112	1592	0
3	17	14	"iYHR004C"	"iYHR004C"	14290	16520	140	2270	1970	1317	93	108	68	94	89	0	1313	1204	819	73	86	76	83	78	0	1.756	1.660	1.691	1.844	1.716	1.671	0.930	156	560	3417	3008	0.812	2177	1240	1877	1131	0
3	18	14	"iYHRCdelta4"	"iYHRCdelta4"	14520	16520	140	2061	1769	941	91	103	63	92	89	0	3412	2771	1572	72	82	75	91	88	0	0.590	0.622	0.624	0.639	1.873	0.601	0.914	156	608	5310	4377	-0.762	1970	3340	1678	2699	0
3	19	14	"iYHR017W"	"iYHR017W"	14700	16510	130	592	505	269	91	101	47	84	78	0	1120	925	589	74	87	87	78	76	0	0.479	0.486	0.495	0.548	2.170	0.435	0.853	120	536	1547	1265	-1.062	501	1046	414	851	0
3	20	14	"iYHRCsigma2"	"iYHRCsigma2"	14900	16510	140	158	169	67	90	105	75	44	14	0	585	528	318	74	86	64	82	73	0	0.133	0.174	0.179	0.197	2.769	0.159	0.561	156	586	579	533	-2.910	68	511	79	454	0
3	21	14	"iYHR023W"	"iYHR023W"	15090	16510	140	956	854	452	89	102	72	92	86	0	1344	1110	640	71	85	89	87	83	0	0.681	0.736	0.747	0.770	1.851	0.718	0.904	156	723	2140	1804	-0.554	867	1273	765	1039	0
3	1	15	"iYHR039C"	"iYHR039C"	11110	16780	130	454	405	210	90	93	27	88	83	0	1050	881	558	69	74	88	80	74	0	0.371	0.388	0.390	0.422	2.067	0.349	0.835	120	689	1345	1127	-1.430	364	981	315	812	0
3	2	15	"iYHR042W"	"iYHR042W"	11330	16780	140	1085	924	515	89	93	28	92	90	0	1383	1185	730	69	73	34	89	85	0	0.758	0.748	0.726	0.810	1.865	0.718	0.899	156	551	2310	1951	-0.400	996	1314	835	1116	0
3	3	15	"iYHR046C"	"iYHR046C"	11490	16770	130	743	685	373	89	95	33	90	86	0	2513	1935	1171	71	81	55	89	87	0	0.268	0.320	0.324	0.354	2.140	0.302	0.893	120	496	3096	2460	-1.901	654	2442	596	1864	0
3	4	15	"iYHR060W"	"iYHR060W"	11710	16770	140	561	498	266	90	96	33	89	85	0	1098	912	554	71	84	81	84	80	0	0.459	0.485	0.486	0.506	2.012	0.464	0.878	156	636	1498	1249	-1.125	471	1027	408	841	0
3	5	15	"iYHR064C"	"iYHR064C"	11910	16770	140	571	524	268	92	96	32	93	87	0	1527	1328	836	71	77	48	91	87	0	0.329	0.344	0.340	0.416	2.154	0.321	0.904	156	564	1935	1689	-1.604	479	1456	432	1257	0
3	6	15	"iYHR068W"	"iYHR068W"	12110	16760	130	348	308	148	95	105	83	73	60	0	1251	964	599	72	77	40	84	80	0	0.215	0.239	0.246	0.263	2.196	0.228	0.837	120	532	1432	1105	-2.220	253	1179	213	892	0
3	7	15	"iYIL023C"	"iYIL023C"	12310	16760	140	661	610	354	94	109	84	81	74	0	1647	1433	949	72	88	72	86	82	0	0.360	0.379	0.382	0.397	2.225	0.364	0.888	156	605	2142	1877	-1.474	567	1575	516	1361	0
3	8	15	"iYIL019W"	"iYIL019W"	12500	16750	130	2061	1743	904	92	117	110	91	90	0	3626	2780	1604	72	115	172	89	87	0	0.554	0.610	0.605	0.653	1.945	0.575	0.934	120	591	5523	4359	-0.852	1969	3554	1651	2708	0
3	9	15	"iYIL015W"	"iYIL015W"	12710	16750	130	397	356	182	93	112	98	72	63	0	1361	1052	654	74	117	173	76	70	0	0.236	0.269	0.282	0.311	2.227	0.261	0.853	120	508	1591	1241	-2.082	304	1287	263	978	0
3	10	15	"iYIL005W"	"iYIL005W"	12910	16750	140	3413	2984	1824	96	111	59	96	91	0	996	848	555	74	93	80	79	75	0	3.598	3.731	3.647	4.213	1.944	3.641	0.788	156	506	4239	3662	1.847	3317	922	2888	774	0
3	11	15	"iYIL001W"	"iYIL001W"	13100	16740	130	1798	1445	860	97	120	85	86	84	0	693	553	343	74	90	69	75	73	0	2.748	2.814	2.719	2.866	2.067	2.775	0.891	120	544	2320	1827	1.458	1701	619	1348	479	0
3	12	15	"iYIR003W"	"iYIR003W"	13310	16740	140	1378	1146	647	93	106	68	89	86	0	852	752	467	72	80	52	82	78	0	1.647	1.549	1.523	1.676	1.912	1.505	0.916	156	598	2065	1733	0.720	1285	780	1053	680	0
3	13	15	"iYIR018W-0"	"iYIR018W-0"	13520	16740	140	3017	2482	1379	91	95	26	94	94	0	4306	3443	2046	71	76	56	90	88	0	0.691	0.709	0.715	0.834	2.230	0.688	0.939	156	509	7161	5763	-0.533	2926	4235	2391	3372	0
3	14	15	"iYIR020C"	"iYIR020C"	13700	16730	130	765	671	411	91	97	33	83	77	0	1775	1399	943	73	90	76	77	75	0	0.396	0.437	0.453	0.473	1.944	0.418	0.904	120	516	2376	1906	-1.336	674	1702	580	1326	0
3	15	15	"iYIR022W"	"iYIR022W"	13920	16730	140	430	397	197	89	93	30	88	83	0	1787	1478	939	72	85	62	87	84	0	0.199	0.219	0.232	0.247	1.989	0.202	0.863	156	591	2056	1714	-2.330	341	1715	308	1406	0
3	16	15	"iYIR038C-0"	"iYIR038C-0"	14120	16730	140	1944	1589	899	89	93	31	96	91	0	3238	2701	1644	71	76	46	94	91	0	0.586	0.570	0.577	0.620	1.777	0.550	0.936	156	502	5022	4130	-0.772	1855	3167	1500	2630	0
3	17	15	"iYIRCdelta6-2"	"iYIRCdelta6-2"	14320	16720	140	2655	2288	1262	95	108	73	92	90	0	5001	4169	2615	72	86	65	88	88	0	0.519	0.535	0.532	0.634	1.975	0.502	0.933	156	457	7489	6290	-0.945	2560	4929	2193	4097	0
3	18	15	"iYIR042C"	"iYIR042C"	14500	16720	130	218	214	99	92	97	32	75	71	0	336	282	170	72	80	55	71	67	0	0.477	0.581	0.572	0.567	2.006	0.531	0.727	120	477	390	332	-1.067	126	264	122	210	0
3	19	15	"iYJR076C"	"iYJR076C"	14700	16720	140	1190	1103	677	90	96	34	93	89	0	2459	2143	1467	72	85	72	90	84	0	0.461	0.489	0.495	0.544	1.961	0.466	0.927	156	559	3487	3084	-1.118	1100	2387	1013	2071	0
3	20	15	"iYJR083C"	"iYJR083C"	14900	16710	140	1156	1082	605	89	95	34	95	92	0	2061	1819	1154	73	84	67	89	86	0	0.537	0.569	0.575	0.663	1.874	0.539	0.939	156	523	3055	2739	-0.898	1067	1988	993	1746	0
3	21	15	"iYJR089W"	"iYJR089W"	15110	16710	140	2929	2449	1380	88	91	26	94	92	0	2729	2185	1312	71	75	49	87	85	0	1.069	1.117	1.123	1.244	1.892	1.092	0.943	156	725	5499	4475	0.096	2841	2658	2361	2114	0
3	1	16	"iYJR102C"	"iYJR102C"	11120	16990	140	866	773	403	90	92	25	91	86	0	3389	2737	1679	71	78	90	89	86	0	0.234	0.256	0.261	0.298	1.914	0.241	0.915	156	701	4094	3349	-2.096	776	3318	683	2666	0
3	2	16	"iYJR106W"	"iYJR106W"	11320	16980	140	463	559	385	89	94	29	89	84	0	952	1476	1320	72	80	67	84	79	0	0.425	0.335	0.341	0.428	2.264	0.290	0.843	156	479	1254	1874	-1.234	374	880	470	1404	0
3	3	16	"iYJR110W"	"iYJR110W"	11500	16980	140	983	873	451	88	94	32	91	89	0	903	780	428	71	84	76	86	82	0	1.076	1.107	1.116	1.205	2.278	1.088	0.884	156	493	1727	1494	0.105	895	832	785	709	0
3	4	16	"iYJR128W"	"iYJR128W"	11720	16980	140	472	433	206	88	91	25	91	88	0	2500	1939	1115	70	72	27	89	86	0	0.158	0.185	0.189	0.215	2.197	0.174	0.879	156	512	2814	2214	-2.662	384	2430	345	1869	0
3	5	16	"iYJR132W"	"iYJR132W"	11920	16970	140	484	458	219	90	94	27	90	85	0	2188	1841	1004	72	75	34	91	88	0	0.186	0.208	0.209	0.228	1.833	0.198	0.876	156	451	2510	2137	-2.425	394	2116	368	1769	0
3	6	16	"iYJR136C"	"iYJR136C"	12090	16960	130	1427	1244	681	95	116	86	88	85	0	810	710	396	75	88	64	84	79	0	1.812	1.809	1.820	1.759	1.899	1.826	0.846	120	456	2067	1784	0.858	1332	735	1149	635	0
3	7	16	"iYJR151C-1"	"iYJR151C-1"	12300	16960	140	4397	3700	1991	96	123	99	92	92	0	4707	3913	2347	76	101	100	91	89	0	0.929	0.939	0.934	1.081	1.893	0.902	0.920	156	575	8932	7441	-0.107	4301	4631	3604	3837	0
3	8	16	"iYJR153W-1"	"iYJR153W-1"	12510	16960	140	629	552	274	94	116	108	82	75	0	4332	3519	1976	74	118	172	86	85	0	0.126	0.133	0.137	0.159	2.064	0.128	0.869	156	578	4793	3903	-2.993	535	4258	458	3445	0
3	9	16	"iYJR157W-0"	"iYJR157W-0"	12700	16950	140	3351	2928	1537	96	144	194	90	86	0	3960	3313	1808	77	172	331	86	83	0	0.838	0.875	0.884	0.941	1.788	0.880	0.919	156	482	7138	6068	-0.255	3255	3883	2832	3236	-100
3	10	16	"iYKR051W"	"iYKR051W"	12830	16920	150	570	856	754	96	137	178	60	55	0	971	1448	1363	77	148	305	57	56	0	0.530	0.554	0.564	0.621	2.204	0.513	0.899	156	468	1368	2131	-0.915	474	894	760	1371	-100
3	11	16	"iYKR055W"	"iYKR055W"	13010	16950	150	624	548	265	95	131	156	78	69	0	2274	1733	1058	75	139	291	78	73	0	0.241	0.273	0.280	0.334	2.183	0.253	0.875	156	519	2728	2111	-2.056	529	2199	453	1658	0
3	12	16	"iYKR059W"	"iYKR059W"	13210	16940	150	1065	896	510	95	112	75	83	81	0	1155	899	589	74	87	68	76	74	0	0.897	0.971	0.950	1.108	2.327	0.912	0.871	156	568	2051	1626	-0.156	970	1081	801	825	0
3	13	16	"itK(UUU)K"	"itK(UUU)K"	13410	16930	150	307	281	135	89	97	38	80	75	0	844	686	416	73	80	49	80	76	0	0.283	0.313	0.324	0.352	1.862	0.290	0.816	156	556	989	805	-1.822	218	771	192	613	0
3	14	16	"iYKR076W"	"iYKR076W"	13610	16930	150	977	819	468	90	98	39	91	84	0	2207	1728	1166	72	90	99	79	76	0	0.415	0.440	0.438	0.559	2.600	0.404	0.903	156	561	3022	2385	-1.267	887	2135	729	1656	0
3	15	16	"iYKR080W"	"iYKR080W"	13810	16920	150	492	424	214	91	99	41	83	79	0	1156	928	572	73	96	103	78	78	0	0.370	0.389	0.396	0.455	2.505	0.356	0.837	156	591	1484	1188	-1.433	401	1083	333	855	0
3	16	16	"iYKR095W"	"iYKR095W"	14010	16920	150	3405	2929	1650	90	101	54	94	93	0	5820	4717	2910	71	90	108	90	89	0	0.577	0.611	0.596	0.644	1.896	0.581	0.930	156	549	9064	7485	-0.794	3315	5749	2839	4646	0
3	17	16	"iYKR099W"	"iYKR099W"	14220	16910	150	4891	3992	2334	93	125	148	88	85	0	3855	3041	1903	72	107	153	84	83	0	1.268	1.313	1.304	1.475	1.987	1.290	0.936	156	561	8581	6868	0.343	4798	3783	3899	2969	0
3	18	16	"iYKR101W-2"	"iYKR101W-2"	14410	16900	150	1247	1083	684	95	124	148	80	73	0	4880	3933	2756	75	115	216	82	78	0	0.240	0.256	0.261	0.311	2.109	0.240	0.898	156	611	5957	4846	-2.060	1152	4805	988	3858	0
3	19	16	"iYLL062C"	"iYLL062C"	14640	16920	140	1863	1612	749	92	99	65	93	91	0	3385	2800	1366	73	95	191	91	89	0	0.535	0.557	0.552	0.555	1.680	0.542	0.920	156	597	5083	4247	-0.903	1771	3312	1520	2727	0
3	20	16	"iYLL058W"	"iYLL058W"	14830	16910	140	711	667	345	88	93	27	93	92	0	2700	2254	1292	73	75	43	91	89	0	0.237	0.265	0.272	0.288	1.916	0.253	0.895	156	506	3250	2760	-2.076	623	2627	579	2181	0
3	21	16	"iYLL055W"	"iYLL055W"	15020	16900	150	3854	3406	1900	91	97	44	94	92	0	4676	3892	2361	72	80	70	89	87	0	0.817	0.868	0.883	1.005	1.916	0.838	0.939	156	700	8367	7135	-0.291	3763	4604	3315	3820	0
3	1	17	"iYLRWdelta14"	"iYLRWdelta14"	11030	17170	150	1043	887	504	89	92	26	90	86	0	1563	1274	788	72	73	32	84	80	0	0.640	0.664	0.675	0.730	1.802	0.648	0.934	156	767	2445	2000	-0.644	954	1491	798	1202	0
3	2	17	"iYLR259C"	"iYLR259C"	11240	17180	130	584	537	236	91	94	29	92	91	0	2979	2505	1242	72	78	45	93	92	0	0.170	0.183	0.188	0.207	1.836	0.177	0.917	120	523	3400	2879	-2.560	493	2907	446	2433	0
3	3	17	"iYLR263W"	"iYLR263W"	11430	17160	150	470	429	241	90	94	31	82	77	0	1176	930	593	72	78	62	79	75	0	0.344	0.395	0.404	0.438	2.016	0.387	0.904	156	549	1484	1197	-1.539	380	1104	339	858	0
3	4	17	"iYLR281C"	"iYLR281C"	11630	17160	150	312	308	149	88	92	28	86	79	0	616	530	308	71	76	97	79	71	0	0.411	0.479	0.472	0.506	2.253	0.456	0.867	156	551	769	679	-1.283	224	545	220	459	0
3	5	17	"iYLR286C"	"iYLR286C"	11830	17150	150	1433	1206	773	89	96	35	89	85	0	2282	1769	1185	71	85	152	80	73	0	0.608	0.658	0.668	0.732	1.924	0.652	0.955	156	500	3555	2815	-0.718	1344	2211	1117	1698	0
3	6	17	"iYLR289W"	"iYLR289W"	12030	17150	150	393	370	197	93	110	76	76	69	0	857	766	462	75	95	150	78	71	0	0.384	0.401	0.424	0.464	2.017	0.367	0.813	156	561	1082	968	-1.382	300	782	277	691	0
3	7	17	"iYLR304C"	"iYLR304C"	12230	17140	150	660	615	399	93	117	93	75	69	0	1316	1304	963	75	95	91	78	75	0	0.457	0.425	0.445	0.449	1.862	0.411	0.913	156	630	1808	1751	-1.130	567	1241	522	1229	0
3	8	17	"iYLR308W"	"iYLR308W"	12440	17150	130	569	532	241	91	102	67	86	83	0	1366	1149	581	75	92	95	85	83	0	0.370	0.411	0.402	0.408	1.574	0.392	0.911	120	572	1769	1515	-1.433	478	1291	441	1074	0
3	9	17	"iYLR312W-A"	"iYLR312W-A"	12650	17150	140	528	474	243	93	103	86	80	73	0	2727	2251	1389	77	93	95	88	83	0	0.164	0.175	0.187	0.203	1.931	0.170	0.907	156	585	3085	2555	-2.607	435	2650	381	2174	0
3	10	17	"iYLR330W"	"iYLR330W"	12850	17150	150	951	788	493	94	125	159	73	66	0	3773	2994	2099	78	144	289	83	75	0	0.232	0.238	0.242	0.276	2.011	0.238	0.906	156	586	4552	3610	-2.108	857	3695	694	2916	0
3	11	17	"iSNR61"	"iSNR61"	13050	17150	140	340	327	141	91	98	36	87	82	0	954	800	444	75	99	117	83	79	0	0.283	0.326	0.313	0.347	1.817	0.299	0.832	156	509	1128	961	-1.820	249	879	236	725	0
3	12	17	"iYLRWdelta20"	"iYLRWdelta20"	13230	17140	150	323	317	163	93	100	40	78	75	0	904	775	518	74	89	74	78	73	0	0.277	0.320	0.334	0.383	2.165	0.300	0.860	156	567	1060	925	-1.851	230	830	224	701	0
3	13	17	"iYMR033W"	"iYMR033W"	13440	17140	140	1130	991	515	94	103	44	90	89	0	1444	1203	685	76	100	142	85	80	0	0.757	0.796	0.787	0.848	1.933	0.759	0.889	156	577	2404	2024	-0.401	1036	1368	897	1127	0
3	14	17	"iYMR037C"	"iYMR037C"	13640	17140	140	2245	1963	1144	95	107	52	94	91	0	2934	2607	1622	76	107	158	87	83	0	0.752	0.738	0.747	0.834	1.780	0.722	0.955	156	608	5008	4399	-0.411	2150	2858	1868	2531	0
3	15	17	"iYMR041C"	"iYMR041C"	13850	17130	140	1366	1218	725	92	96	31	94	90	0	1543	1366	900	73	79	63	83	79	0	0.867	0.871	0.881	1.047	2.256	0.841	0.932	156	580	2744	2419	-0.206	1274	1470	1126	1293	0
3	16	17	"iYMR054W"	"iYMR054W"	14040	17130	140	430	406	200	89	99	53	86	77	0	1093	923	517	72	87	105	83	81	0	0.334	0.373	0.369	0.372	1.744	0.362	0.887	156	573	1362	1168	-1.582	341	1021	317	851	0
3	17	17	"iYMR058W"	"iYMR058W"	14240	17120	130	1344	1110	594	92	116	139	85	80	0	1482	1184	680	73	89	112	85	80	0	0.889	0.916	0.942	0.942	1.430	0.901	0.942	120	571	2661	2129	-0.170	1252	1409	1018	1111	0
3	18	17	"iYMR063W"	"iYMR063W"	14440	17120	130	317	306	132	93	102	66	82	71	0	856	709	356	74	97	191	82	71	0	0.286	0.335	0.330	0.357	1.966	0.303	0.767	120	591	1006	848	-1.804	224	782	213	635	0
3	19	17	"iYMR078C"	"iYMR078C"	14650	17120	140	521	475	254	91	94	26	90	85	0	1782	1434	862	73	76	33	93	90	0	0.252	0.282	0.284	0.298	1.776	0.276	0.907	156	609	2139	1745	-1.991	430	1709	384	1361	0
3	20	17	"iYMR082C-0"	"iYMR082C-0"	14850	17110	130	640	591	278	92	95	26	92	88	0	2796	2422	1287	74	78	36	90	88	0	0.201	0.213	0.221	0.236	1.721	0.208	0.932	120	545	3270	2847	-2.312	548	2722	499	2348	0
3	21	17	"iYMR085W"	"iYMR085W"	15060	17110	140	332	326	168	91	97	42	81	75	0	851	747	464	73	83	112	79	72	0	0.310	0.349	0.361	0.383	2.050	0.339	0.859	156	783	1019	909	-1.691	241	778	235	674	0
3	1	18	"iYMR101C"	"iYMR101C"	11070	17390	140	935	852	434	90	94	25	93	91	0	1857	1552	859	72	74	42	89	87	0	0.473	0.515	0.524	0.532	1.954	0.499	0.923	156	682	2630	2242	-1.079	845	1785	762	1480	0
3	2	18	"iYMR105C"	"iYMR105C"	11250	17380	130	823	784	384	91	94	25	97	96	0	2639	2274	1265	73	78	48	95	92	0	0.285	0.315	0.316	0.367	1.842	0.304	0.931	120	530	3298	2894	-1.810	732	2566	693	2201	0
3	3	18	"iYMR107W"	"iYMR107W"	11460	17380	140	763	684	324	91	95	31	92	89	0	1971	1618	905	73	80	88	87	83	0	0.354	0.384	0.384	0.427	1.704	0.361	0.914	156	698	2570	2138	-1.498	672	1898	593	1545	0
3	4	18	"iYNL272C"	"iYNL272C"	11690	17370	140	504	465	226	89	93	26	89	86	0	2540	2070	1227	73	82	100	82	81	0	0.168	0.188	0.183	0.221	2.241	0.178	0.905	156	618	2882	2373	-2.572	415	2467	376	1997	0
3	5	18	"iYNL267W"	"iYNL267W"	11860	17370	140	495	469	211	89	94	34	91	88	0	1004	863	463	71	89	148	83	78	0	0.435	0.480	0.477	0.499	1.676	0.449	0.868	156	577	1339	1172	-1.200	406	933	380	792	0
3	6	18	"iYNL262W"	"iYNL262W"	12050	17360	130	372	335	151	92	94	26	84	80	0	1436	1175	671	72	91	149	79	76	0	0.205	0.220	0.224	0.250	1.893	0.188	0.782	120	547	1644	1346	-2.284	280	1364	243	1103	0
3	7	18	"iYNL244C"	"iYNL244C"	12260	17360	140	997	898	464	91	96	30	91	89	0	2091	1715	978	74	88	63	88	88	0	0.449	0.492	0.496	0.517	2.041	0.468	0.884	156	693	2923	2448	-1.155	906	2017	807	1641	0
3	8	18	"iYNL240C"	"iYNL240C"	12470	17360	130	335	315	130	91	95	29	88	85	0	1522	1310	710	74	79	44	85	85	0	0.169	0.181	0.185	0.202	1.798	0.168	0.843	120	578	1692	1460	-2.569	244	1448	224	1236	0
3	9	18	"iYNL235C"	"iYNL235C"	12650	17350	130	804	680	345	94	99	35	86	84	0	2022	1576	893	76	95	89	84	84	0	0.365	0.391	0.399	0.418	1.646	0.376	0.928	120	578	2656	2086	-1.455	710	1946	586	1500	0
3	10	18	"iYNL217W"	"iYNL217W"	12880	17350	140	456	416	203	91	98	35	87	82	0	2222	1843	1020	76	101	118	85	83	0	0.170	0.184	0.187	0.192	1.894	0.179	0.894	156	621	2511	2092	-2.556	365	2146	325	1767	0
3	11	18	"iYNL213C"	"iYNL213C"	13070	17340	130	598	540	253	91	94	28	93	90	0	2664	2104	1134	73	87	96	91	89	0	0.196	0.221	0.225	0.238	1.664	0.215	0.924	120	523	3098	2480	-2.353	507	2591	449	2031	0
3	12	18	"iYNL209W"	"iYNL209W"	13280	17340	140	482	438	204	94	97	28	90	86	0	2124	1696	919	76	89	67	91	89	0	0.189	0.212	0.226	0.227	1.951	0.208	0.909	156	560	2436	1964	-2.400	388	2048	344	1620	0
3	13	18	"iYNL189W"	"iYNL189W"	13460	17330	130	892	754	383	97	108	49	85	84	0	2149	1686	987	78	112	155	84	80	0	0.384	0.409	0.408	0.423	1.585	0.388	0.924	120	529	2866	2265	-1.381	795	2071	657	1608	0
3	14	18	"iYNL184C"	"iYNL184C"	13670	17330	130	1160	1000	506	99	114	60	89	83	0	1652	1316	735	80	115	123	83	80	0	0.675	0.729	0.728	0.732	1.697	0.685	0.935	120	606	2633	2137	-0.567	1061	1572	901	1236	0
3	15	18	"iYNL179C-0"	"iYNL179C-0"	13890	17330	140	582	582	300	93	103	50	90	85	0	1606	1518	897	76	93	98	88	85	0	0.320	0.339	0.337	0.353	1.578	0.326	0.919	156	613	2019	1931	-1.646	489	1530	489	1442	0
3	16	18	"iYOL125W"	"iYOL125W"	14090	17330	140	455	429	243	88	90	23	84	81	0	1022	844	547	74	77	83	79	75	0	0.387	0.443	0.440	0.495	2.147	0.416	0.849	156	576	1315	1111	-1.369	367	948	341	770	0
3	17	18	"iYOL121C"	"iYOL121C"	14290	17320	140	904	817	389	90	94	27	95	94	0	3461	2820	1632	75	79	75	91	89	0	0.240	0.265	0.263	0.308	1.895	0.246	0.923	156	584	4200	3472	-2.056	814	3386	727	2745	0
3	18	18	"iYOL117W"	"iYOL117W"	14480	17320	140	823	738	367	90	94	27	92	91	0	4209	3309	1886	75	81	46	91	90	0	0.177	0.200	0.201	0.227	2.098	0.190	0.918	156	576	4867	3882	-2.496	733	4134	648	3234	0
3	19	18	"iYOLWdelta5"	"iYOLWdelta5"	14690	17320	140	1064	942	468	90	92	24	96	94	0	2676	2352	1310	73	76	34	93	91	0	0.374	0.374	0.376	0.438	1.898	0.358	0.934	156	529	3577	3131	-1.418	974	2603	852	2279	0
3	20	18	"iYOL099C"	"iYOL099C"	14870	17310	140	1365	1145	609	93	96	32	94	92	0	1957	1547	912	75	85	79	86	84	0	0.676	0.715	0.723	0.839	1.830	0.685	0.934	156	563	3154	2524	-0.565	1272	1882	1052	1472	0
3	21	18	"iYOL096C"	"iYOL096C"	15070	17300	130	588	524	258	93	98	34	90	86	0	2159	1762	1017	75	91	94	87	85	0	0.238	0.255	0.256	0.284	1.620	0.243	0.892	120	642	2579	2118	-2.074	495	2084	431	1687	0
3	1	19	"iYOL081W"	"iYOL081W"	11100	17590	140	1056	890	483	92	95	24	94	91	0	2433	2070	1283	71	74	48	88	87	0	0.408	0.399	0.402	0.472	2.023	0.380	0.932	156	634	3326	2797	-1.293	964	2362	798	1999	0
3	2	19	"iYOL076W"	"iYOL076W"	11290	17580	140	988	873	416	92	95	26	96	92	0	1391	1124	591	73	81	56	92	87	0	0.680	0.743	0.745	0.766	1.609	0.724	0.938	156	560	2214	1832	-0.557	896	1318	781	1051	0
3	3	19	"iYOL071W"	"iYOL071W"	11480	17580	130	342	325	144	92	95	27	85	85	0	820	706	413	73	75	34	87	85	0	0.335	0.368	0.361	0.392	1.826	0.335	0.869	120	527	997	866	-1.579	250	747	233	633	0
3	4	19	"iYOL055C"	"iYOL055C"	11670	17570	130	662	581	307	93	99	32	86	83	0	2391	1925	1146	74	95	110	83	83	0	0.246	0.264	0.267	0.286	1.803	0.255	0.933	120	606	2886	2339	-2.026	569	2317	488	1851	0
3	5	19	"iYOL054W"	"iYOL054W"	11900	17570	140	851	728	396	92	97	32	90	89	0	2403	1856	1124	72	97	117	87	83	0	0.326	0.357	0.356	0.393	1.755	0.349	0.939	156	598	3090	2420	-1.619	759	2331	636	1784	0
3	6	19	"iYOL050C"	"iYOL050C"	12090	17560	140	986	929	529	93	96	28	97	95	0	1275	1044	633	71	85	68	89	87	0	0.742	0.859	0.868	0.938	1.732	0.849	0.940	156	569	2097	1809	-0.431	893	1204	836	973	0
3	7	19	"iYOR248W"	"iYOR248W"	12300	17570	140	1769	1489	781	93	97	31	96	94	0	2813	2273	1378	73	79	52	89	87	0	0.612	0.635	0.635	0.793	1.990	0.604	0.949	156	573	4416	3596	-0.709	1676	2740	1396	2200	0
3	8	19	"iYOR252W"	"iYOR252W"	12480	17550	130	370	355	167	94	97	28	87	81	0	1591	1313	809	74	86	61	88	84	0	0.182	0.211	0.206	0.232	1.845	0.197	0.857	120	525	1793	1500	-2.458	276	1517	261	1239	0
3	9	19	"iYOR256C"	"iYOR256C"	12690	17550	140	420	390	185	99	105	36	86	82	0	2528	2081	1293	78	114	110	85	83	0	0.131	0.145	0.153	0.182	1.969	0.138	0.886	156	616	2771	2294	-2.932	321	2450	291	2003	0
3	10	19	"iYOR272W"	"iYOR272W"	12890	17550	140	1477	1230	672	94	97	30	96	92	0	2518	2040	1238	75	93	94	87	81	0	0.566	0.578	0.576	0.735	2.380	0.559	0.944	156	559	3826	3101	-0.821	1383	2443	1136	1965	0
3	11	19	"iYOR277C"	"iYOR277C"	13090	17550	140	2601	2166	1053	89	93	28	100	99	0	5069	4175	2211	74	82	66	97	94	0	0.503	0.506	0.504	0.562	1.596	0.492	0.965	156	547	7507	6178	-0.992	2512	4995	2077	4101	0
3	12	19	"iYOR283W"	"iYOR283W"	13280	17540	140	1550	1297	740	91	96	33	91	90	0	2930	2361	1480	76	91	71	89	83	0	0.511	0.528	0.530	0.604	1.783	0.510	0.961	156	539	4313	3491	-0.968	1459	2854	1206	2285	0
3	13	19	"iYOR298W"	"iYOR298W"	13460	17530	130	645	540	303	94	109	71	78	72	0	1549	1152	784	78	120	168	73	70	0	0.375	0.415	0.399	0.452	1.774	0.386	0.915	120	562	2022	1520	-1.417	551	1471	446	1074	0
3	14	19	"iYOR303W"	"iYOR303W"	13690	17540	150	319	341	179	94	108	73	76	62	0	1546	1329	842	78	110	159	85	80	0	0.153	0.197	0.204	0.222	2.174	0.195	0.876	156	697	1693	1498	-2.706	225	1468	247	1251	0
3	15	19	"iYOR306C"	"iYOR306C"	13880	17530	130	1645	1415	838	92	96	32	87	85	0	3883	3133	2016	76	88	67	85	85	0	0.408	0.433	0.439	0.451	1.536	0.417	0.956	120	539	5360	4380	-1.294	1553	3807	1323	3057	0
3	16	19	"iYOR322C"	"iYOR322C"	14090	17530	140	1165	1012	650	93	100	69	87	83	0	3359	2718	1923	76	96	149	83	78	0	0.327	0.348	0.357	0.410	2.036	0.339	0.937	156	592	4355	3561	-1.615	1072	3283	919	2642	0
3	17	19	"iYOR327C"	"iYOR327C"	14300	17530	140	1102	1087	639	91	97	68	91	85	0	2431	2339	1552	76	89	140	86	82	0	0.429	0.440	0.449	0.490	1.791	0.421	0.932	156	598	3366	3259	-1.220	1011	2355	996	2263	0
3	18	19	"iYOR332W"	"iYOR332W"	14500	17520	140	1448	1437	1003	91	95	45	94	90	0	3040	2909	2138	76	86	92	89	85	0	0.458	0.475	0.472	0.540	1.868	0.458	0.924	156	558	4321	4179	-1.127	1357	2964	1346	2833	0
3	19	19	"iYPL045W"	"iYPL045W"	14700	17520	140	330	339	209	89	94	45	76	66	0	1287	1328	1113	73	79	94	69	66	0	0.199	0.199	0.217	0.277	2.255	0.185	0.860	156	492	1455	1505	-2.333	241	1214	250	1255	0
3	20	19	"iYPL040C"	"iYPL040C"	14890	17510	140	488	441	213	91	95	33	87	85	0	2461	2033	1210	73	83	82	87	85	0	0.166	0.179	0.185	0.207	1.866	0.168	0.881	156	554	2785	2310	-2.589	397	2388	350	1960	0
3	21	19	"iYPL036W"	"iYPL036W"	15100	17510	140	2239	1803	1011	91	95	30	97	96	0	4849	3795	2237	73	88	114	91	87	0	0.450	0.460	0.463	0.510	1.786	0.451	0.938	156	811	6924	5434	-1.153	2148	4776	1712	3722	0
3	1	20	"iYPL017C"	"iYPL017C"	11090	17780	140	333	342	183	93	95	25	86	82	0	1197	1036	706	72	79	86	82	79	0	0.213	0.258	0.248	0.290	2.186	0.239	0.837	156	793	1365	1213	-2.229	240	1125	249	964	0
3	2	20	"iYPL013C"	"iYPL013C"	11290	17780	140	2276	1959	1205	92	97	32	92	91	0	2347	1999	1347	74	79	48	87	83	0	0.961	0.970	0.955	1.064	2.409	0.932	0.945	156	715	4457	3792	-0.058	2184	2273	1867	1925	0
3	3	20	"iYPL009C"	"iYPL009C"	11500	17780	140	1218	1071	666	90	96	32	89	87	0	2250	1861	1312	75	78	43	86	83	0	0.519	0.549	0.541	0.611	2.104	0.525	0.923	156	730	3303	2767	-0.947	1128	2175	981	1786	0
3	4	20	"iYPR005C"	"iYPR005C"	11670	17770	130	1034	883	513	94	108	76	83	80	0	1910	1507	1054	77	114	193	75	68	0	0.513	0.552	0.548	0.645	2.127	0.509	0.933	120	636	2773	2219	-0.963	940	1833	789	1430	0
3	5	20	"itG(GCC)P1"	"itG(GCC)P1"	11890	17770	150	854	779	446	94	106	68	88	82	0	1812	1521	949	75	112	184	84	75	0	0.438	0.474	0.475	0.538	1.954	0.461	0.936	156	850	2497	2131	-1.193	760	1737	685	1446	0
3	6	20	"itK(CUU)P"	"itK(CUU)P"	12090	17760	150	1812	1556	871	94	98	33	96	92	0	4797	3815	2344	73	84	60	91	91	0	0.364	0.391	0.401	0.469	1.774	0.378	0.943	156	732	6442	5204	-1.459	1718	4724	1462	3742	0
3	7	20	"iYPR024W"	"iYPR024W"	12280	17760	140	5213	4303	2591	94	103	52	97	95	0	3585	2891	1836	73	88	116	92	87	0	1.458	1.494	1.506	1.678	1.617	1.470	0.959	156	733	8631	7027	0.544	5119	3512	4209	2818	0
3	8	20	"itF(GAA)P2"	"itF(GAA)P2"	12510	17750	140	2425	2003	1284	95	104	51	92	86	0	2869	2304	1580	76	93	89	83	79	0	0.834	0.856	0.866	1.007	1.747	0.832	0.961	156	750	5123	4136	-0.261	2330	2793	1908	2228	0
3	9	20	"iYPR031W"	"iYPR031W"	12700	17750	140	1359	1182	682	97	103	33	94	91	0	1565	1313	815	77	99	101	85	82	0	0.848	0.878	0.865	0.928	1.645	0.860	0.947	156	719	2750	2321	-0.238	1262	1488	1085	1236	0
3	10	20	"CEN3"	"CEN3"	12900	17740	130	280	279	122	95	98	31	85	80	0	352	334	178	75	85	67	80	74	0	0.668	0.710	0.699	0.668	1.859	0.645	0.775	120	600	462	443	-0.582	185	277	184	259	0
3	11	20	"iRDN5-2"	"iRDN5-2"	13090	17740	140	179	183	65	91	94	25	84	71	0	241	221	106	74	74	21	82	76	0	0.527	0.626	0.596	0.594	2.050	0.585	0.669	156	691	255	239	-0.924	88	167	92	147	0
3	12	20	"itN(GUU)C"	"itN(GUU)C"	13280	17730	130	182	195	76	91	95	30	85	66	0	269	262	142	75	84	65	77	70	0	0.469	0.556	0.518	0.529	2.061	0.452	0.613	120	609	285	291	-1.092	91	194	104	187	0
3	13	20	"iYCL018W"	"iYCL018W"	13490	17730	150	3502	2869	1450	92	111	116	97	94	0	1870	1530	829	76	111	288	86	76	0	1.901	1.910	1.904	2.134	1.572	1.867	0.957	156	827	5204	4231	0.927	3410	1794	2777	1454	0
3	14	20	"iYCR003W"	"iYCR003W"	13690	17730	140	3786	3292	1798	91	106	70	100	97	0	1330	1156	641	77	84	46	91	89	0	2.949	2.967	2.977	3.476	1.933	2.947	0.958	156	723	4948	4280	1.560	3695	1253	3201	1079	0
3	15	20	"iYCR007C"	"iYCR007C"	13900	17730	140	1195	1020	573	91	102	57	96	93	0	2658	2286	1400	74	90	136	94	91	0	0.427	0.420	0.414	0.431	1.452	0.409	0.954	156	728	3688	3141	-1.227	1104	2584	929	2212	0
3	16	20	"iYHR212C"	"iYHR212C"	14090	17720	140	2690	2569	1576	93	100	65	95	91	0	4279	3959	2588	75	98	177	87	83	0	0.618	0.637	0.639	0.751	1.820	0.620	0.960	156	705	6801	6360	-0.695	2597	4204	2476	3884	0
3	17	20	"iYHR214W-A"	"iYHR214W-A"	14290	17720	130	597	569	272	92	95	28	93	91	0	1100	1037	540	77	87	113	90	85	0	0.494	0.497	0.493	0.543	1.714	0.462	0.876	120	654	1528	1437	-1.018	505	1023	477	960	0
3	18	20	"iYHR218W"	"iYHR218W"	14510	17720	140	7971	7253	3626	92	97	44	100	100	0	13312	12216	5965	76	85	92	99	98	0	0.595	0.590	0.592	0.615	1.397	0.590	0.974	156	740	21115	19301	-0.748	7879	13236	7161	12140	0
3	19	20	"iYLR162W-A"	"iYLR162W-A"	14700	17710	140	2720	2653	1534	92	98	46	99	98	0	5681	5323	3106	73	84	104	96	94	0	0.469	0.488	0.488	0.529	1.505	0.484	0.972	156	642	8236	7811	-1.094	2628	5608	2561	5250	0
3	20	20	"iYLRWdelta6-B"	"iYLRWdelta6-B"	14890	17710	140	5515	4851	3570	93	102	87	94	91	0	6505	5807	4521	71	86	98	87	83	0	0.843	0.829	0.840	1.060	1.868	0.805	0.975	156	738	11856	10494	-0.247	5422	6434	4758	5736	0
3	21	20	"RDN5-1"	"RDN5-1"	15110	17710	130	899	839	440	92	98	58	90	88	0	1349	1161	645	70	79	81	88	85	0	0.631	0.685	0.680	0.713	1.613	0.675	0.942	120	772	2086	1838	-0.664	807	1279	747	1091	0
4	1	1	"TFC3"	"YAL001C"	15470	13810	150	20275	18525	9130	90	111	183	99	98	0	5458	4718	2519	66	72	99	94	92	0	3.744	3.963	3.894	4.461	1.582	3.919	0.958	156	835	25577	23087	1.904	20185	5392	18435	4652	0
4	2	1	"FUN19"	"YAL034C"	15670	13800	150	3059	2708	1756	91	97	43	92	90	0	5284	4623	2937	66	71	62	94	91	0	0.569	0.574	0.574	0.567	1.799	0.575	0.944	156	836	8186	7174	-0.814	2968	5218	2617	4557	0
4	3	1	"YAL065C"	"YAL065C"	15880	13800	140	6354	5699	2455	90	93	29	100	100	0	14111	12076	5244	64	74	119	99	97	0	0.446	0.467	0.469	0.484	1.457	0.462	0.968	156	701	20311	17621	-1.165	6264	14047	5609	12012	0
4	4	1	"EFB1"	"YAL003W"	16060	13780	150	3029	2585	1255	89	92	27	96	94	0	3977	3197	1711	65	75	130	87	86	0	0.752	0.797	0.789	0.870	1.911	0.777	0.948	156	808	6852	5628	-0.412	2940	3912	2496	3132	0
4	5	1	"YAL035C-A"	"YAL035C-A"	16290	13790	140	2795	2532	957	90	94	32	99	98	0	2900	2566	1036	66	67	53	98	96	0	0.954	0.977	0.986	1.019	1.347	0.959	0.957	156	727	5539	4942	-0.067	2705	2834	2442	2500	0
4	6	1	"YAL066W"	"YAL066W"	16470	13790	140	2027	1842	673	88	91	30	99	99	0	2278	1968	806	66	65	28	96	96	0	0.877	0.922	0.926	1.058	1.987	0.898	0.926	156	685	4151	3656	-0.190	1939	2212	1754	1902	0
4	7	1	"SSA1"	"YAL005C"	16670	13780	150	5789	4900	2426	89	90	24	99	99	0	8411	6981	3686	66	68	95	94	94	0	0.683	0.696	0.695	0.785	1.903	0.677	0.944	156	830	14045	11726	-0.550	5700	8345	4811	6915	0
4	8	1	"FUN11"	"YAL036C"	16880	13800	140	1452	1260	582	90	95	41	98	95	0	7222	5845	3061	66	86	190	97	94	0	0.190	0.202	0.205	0.223	1.675	0.194	0.956	156	719	8518	6949	-2.393	1362	7156	1170	5779	0
4	9	1	"YAL068C"	"YAL068C"	17090	13770	140	11031	9411	3976	91	115	141	99	98	0	20053	16607	7825	67	124	352	95	94	0	0.547	0.563	0.563	0.637	1.674	0.541	0.952	156	732	30926	25860	-0.869	10940	19986	9320	16540	0
4	10	1	"FUN14"	"YAL008W"	17290	13770	140	7286	6260	3341	90	109	130	98	97	0	5492	4769	2749	65	74	115	95	95	0	1.326	1.312	1.326	1.459	1.756	1.278	0.942	156	699	12623	10874	0.407	7196	5427	6170	4704	0
4	11	1	"CDC19"	"YAL038W"	17480	13760	130	3387	2850	1123	89	96	47	98	96	0	8049	6654	2833	64	70	96	95	94	0	0.413	0.419	0.425	0.457	1.650	0.408	0.947	120	686	11283	9351	-1.276	3298	7985	2761	6590	0
4	12	1	"ERP1"	"YAR002C-A"	17700	13780	110	369	562	412	90	96	51	95	86	0	535	967	896	65	72	73	95	86	0	0.594	0.523	0.576	0.594	1.900	0.467	0.876	80	517	749	1374	-0.752	279	470	472	902	0
4	13	1	"RPB5"	"YBR154C"	17890	13760	140	2637	2273	1001	89	97	70	98	96	0	6981	5787	2529	64	69	81	100	99	0	0.368	0.382	0.386	0.384	1.594	0.377	0.930	156	797	9465	7907	-1.441	2548	6917	2184	5723	0
4	14	1	"MBA1"	"YBR185C"	18110	13750	130	3308	2914	1226	89	99	77	97	97	0	5593	4892	2210	64	69	82	96	94	0	0.582	0.585	0.587	0.665	1.884	0.576	0.939	120	644	8748	7653	-0.780	3219	5529	2825	4828	0
4	15	1	"APG12"	"YBR217W"	18280	13750	130	2790	2463	907	87	90	24	100	100	0	6655	5644	2327	64	63	26	100	100	0	0.410	0.426	0.426	0.454	1.455	0.403	0.952	120	635	9294	7956	-1.286	2703	6591	2376	5580	0
4	16	1	"SLI15"	"YBR156C"	18480	13750	130	10805	9571	3309	88	94	47	100	100	0	12722	11008	4349	63	67	81	100	99	0	0.847	0.866	0.847	0.913	1.366	0.831	0.958	120	669	23376	20428	-0.240	10717	12659	9483	10945	0
4	17	1	"YBR187W"	"YBR187W"	18680	13750	130	1401	1507	695	88	93	47	98	95	0	3827	3853	1936	65	68	76	95	93	0	0.349	0.375	0.385	0.411	1.551	0.363	0.943	120	710	5075	5207	-1.519	1313	3762	1419	3788	0
4	18	1	"YBR219C"	"YBR219C"	18900	13740	130	1719	1589	585	88	90	26	100	98	0	6827	5902	2420	64	65	58	99	96	0	0.241	0.257	0.256	0.287	1.547	0.244	0.937	120	680	8394	7339	-2.052	1631	6763	1501	5838	0
4	19	1	"ICS4"	"YBR158W"	19090	13740	140	4435	3831	1570	89	91	25	100	99	0	11110	9226	4081	64	61	21	99	98	0	0.393	0.408	0.411	0.454	1.680	0.395	0.954	156	730	15392	12904	-1.346	4346	11046	3742	9162	0
4	20	1	"RPS9B"	"YBR189W"	19290	13740	130	5282	4578	1682	87	92	47	98	98	0	9236	8017	3426	65	76	111	96	95	0	0.566	0.565	0.557	0.647	1.742	0.533	0.956	120	655	14366	12443	-0.820	5195	9171	4491	7952	0
4	21	1	"PDB1"	"YBR221C"	19490	13740	130	1253	1141	435	87	93	46	98	96	0	9462	8201	3441	65	87	145	97	96	0	0.124	0.130	0.128	0.138	1.481	0.124	0.943	120	758	10563	9190	-3.011	1166	9397	1054	8136	0
4	1	2	"CDC28"	"YBR160W"	15490	14010	140	1822	1587	625	92	94	28	99	98	0	7884	6727	2880	65	63	19	98	98	0	0.221	0.224	0.225	0.251	1.776	0.218	0.954	156	660	9549	8157	-2.176	1730	7819	1495	6662	0
4	2	2	"RPL21A"	"YBR191W"	15710	14010	130	2238	2040	763	91	95	31	97	97	0	5351	4691	1879	65	71	63	96	95	0	0.406	0.421	0.416	0.447	1.677	0.412	0.960	120	609	7433	6575	-1.300	2147	5286	1949	4626	0
4	3	2	"YBR223C"	"YBR223C"	15910	14000	140	1313	1158	480	92	94	29	98	96	0	5805	4818	2199	66	82	133	94	93	0	0.213	0.224	0.229	0.244	1.648	0.218	0.951	156	618	6960	5818	-2.233	1221	5739	1066	4752	0
4	4	2	"RPN4"	"YDL020C"	16100	13990	130	1444	1441	610	90	92	27	98	96	0	1815	1834	861	66	76	124	93	92	0	0.774	0.764	0.759	0.773	1.394	0.750	0.936	120	566	3103	3119	-0.369	1354	1749	1351	1768	0
4	5	2	"SLC1"	"YDL052C"	16300	13990	140	763	758	335	90	93	26	97	95	0	1675	1626	817	66	83	299	88	85	0	0.418	0.428	0.436	0.464	1.741	0.366	0.798	156	582	2282	2228	-1.257	673	1609	668	1560	0
4	6	2	"SUB2"	"YDL084W"	16490	13990	130	2395	2361	957	90	93	27	100	97	0	3170	3091	1326	66	83	309	93	91	0	0.743	0.751	0.745	0.768	1.381	0.711	0.904	120	548	5409	5296	-0.429	2305	3104	2271	3025	0
4	7	2	"GPD1"	"YDL022W"	16700	13980	130	967	913	322	91	125	306	90	81	0	2982	2734	1064	64	92	295	93	90	0	0.300	0.308	0.311	0.332	1.501	0.283	0.918	120	622	3794	3492	-1.736	876	2918	822	2670	0
4	8	2	"YDL054C"	"YDL054C"	16930	13980	150	1009	938	355	93	159	323	89	75	0	5004	4402	1836	69	259	713	91	87	0	0.186	0.195	0.191	0.209	1.629	0.194	0.730	156	659	5851	5178	-2.430	916	4935	845	4333	-100
4	9	2	"YDL086W"	"YDL086W"	17130	13980	150	140	215	188	93	128	137	25	16	0	341	795	1071	68	243	688	24	16	0	0.172	0.168	0.197	0.217	3.069	0.178	0.913	156	592	320	849	-2.538	47	273	122	727	-100
4	10	2	"YDL024C"	"YDL024C"	17300	13970	140	2862	2627	986	89	93	32	98	97	0	4377	3991	1665	66	72	106	95	94	0	0.643	0.647	0.652	0.717	1.783	0.620	0.945	156	572	7084	6463	-0.637	2773	4311	2538	3925	0
4	11	2	"MBP1"	"YDL056W"	17510	13970	140	774	782	312	88	91	27	100	98	0	1464	1436	688	66	75	129	94	91	0	0.491	0.507	0.506	0.548	1.538	0.477	0.907	156	661	2084	2064	-1.027	686	1398	694	1370	0
4	12	2	"ASM4"	"YDL088C"	17710	13960	130	1317	1308	539	87	91	26	99	97	0	2070	2100	949	65	75	114	95	92	0	0.613	0.600	0.615	0.632	1.458	0.571	0.933	120	561	3235	3256	-0.705	1230	2005	1221	2035	0
4	13	2	"YDL026W"	"YDL026W"	17900	13960	140	1268	1141	422	88	91	29	99	97	0	5318	4453	1875	65	76	140	94	94	0	0.225	0.240	0.239	0.271	1.986	0.228	0.943	156	641	6433	5441	-2.154	1180	5253	1053	4388	0
4	14	2	"USO1"	"YDL058W"	18110	13960	140	1885	1878	830	91	98	69	98	95	0	3241	3167	1451	64	76	144	94	92	0	0.565	0.576	0.602	0.636	1.864	0.558	0.936	156	658	4971	4890	-0.824	1794	3177	1787	3103	0
4	15	2	"RAM1"	"YDL090C"	18310	13950	130	3856	3567	1366	90	95	39	99	96	0	4801	4328	1754	64	66	85	94	93	0	0.795	0.815	0.820	0.863	1.570	0.788	0.953	120	633	8503	7741	-0.331	3766	4737	3477	4264	0
4	16	2	"CPH1"	"YDR155C"	18520	13950	140	374	374	154	89	93	38	93	87	0	2128	1945	896	65	68	86	93	92	0	0.138	0.152	0.155	0.155	1.785	0.148	0.860	156	653	2348	2165	-2.856	285	2063	285	1880	0
4	17	2	"YDR186C"	"YDR186C"	18710	13950	130	491	504	221	88	91	29	95	93	0	902	940	504	66	69	67	91	91	0	0.482	0.476	0.473	0.510	1.780	0.442	0.876	120	592	1239	1290	-1.053	403	836	416	874	0
4	18	2	"SPR28"	"YDR218C"	18920	13940	130	611	610	259	88	90	25	95	93	0	918	845	382	64	68	77	95	91	0	0.612	0.668	0.679	0.682	1.672	0.645	0.883	120	602	1377	1303	-0.707	523	854	522	781	0
4	19	2	"YDR157W"	"YDR157W"	19110	13940	140	927	847	344	89	93	43	99	97	0	3621	2901	1380	63	70	97	96	94	0	0.236	0.267	0.263	0.306	1.805	0.253	0.931	156	614	4396	3596	-2.086	838	3558	758	2838	0
4	20	2	"CCT6"	"YDR188W"	19310	13940	140	1372	1297	524	89	96	57	98	96	0	5317	4634	2250	64	87	280	94	91	0	0.244	0.264	0.260	0.292	1.715	0.248	0.928	156	610	6536	5778	-2.034	1283	5253	1208	4570	0
4	21	2	"YDR220C"	"YDR220C"	19510	13930	130	943	908	281	87	114	366	90	66	0	4229	3924	1411	64	116	580	95	92	0	0.206	0.213	0.211	0.223	1.508	0.201	0.937	120	678	5021	4681	-2.283	856	4165	821	3860	0
4	1	3	"SAC3"	"YDR159W"	15520	14210	140	3387	3209	1419	89	92	27	100	99	0	6882	6184	3016	65	66	57	97	96	0	0.484	0.510	0.509	0.565	1.617	0.492	0.955	156	701	10115	9239	-1.048	3298	6817	3120	6119	0
4	2	3	"RVB1"	"YDR190C"	15720	14210	130	838	824	332	88	90	26	99	97	0	2631	2631	1165	66	69	54	97	97	0	0.292	0.287	0.289	0.291	1.298	0.276	0.926	120	576	3315	3301	-1.774	750	2565	736	2565	0
4	3	3	"YDR222W"	"YDR222W"	15930	14210	140	1659	1532	677	89	90	23	99	99	0	2523	2329	1124	65	70	57	95	94	0	0.639	0.637	0.628	0.697	1.611	0.623	0.960	156	631	4028	3707	-0.647	1570	2458	1443	2264	0
4	4	3	"TCI1"	"YDR161W"	16140	14200	140	773	708	288	88	90	22	99	98	0	5887	4878	2195	66	65	34	98	96	0	0.118	0.129	0.127	0.144	1.868	0.126	0.939	156	611	6506	5432	-3.087	685	5821	620	4812	0
4	5	3	"NUP42"	"YDR192C"	16340	14200	140	2124	1908	689	89	92	25	100	100	0	6538	5499	2251	67	89	318	98	94	0	0.314	0.335	0.340	0.353	1.338	0.320	0.953	156	536	8506	7251	-1.669	2035	6471	1819	5432	0
4	6	3	"HTB1"	"YDR224C"	16530	14190	140	4623	3972	1752	90	93	27	100	99	0	4315	3589	1678	65	81	303	90	87	0	1.067	1.102	1.100	1.222	1.622	1.084	0.964	156	570	8783	7406	0.093	4533	4250	3882	3524	0
4	7	3	"PAD1"	"YDR538W"	16720	14180	130	1609	1540	603	90	132	316	92	86	0	4067	3847	1656	66	103	322	92	90	0	0.380	0.383	0.385	0.415	1.651	0.365	0.929	120	598	5520	5231	-1.397	1519	4001	1450	3781	0
4	8	3	"RIP1"	"YEL024W"	16930	14190	140	2660	2245	1383	90	157	338	83	73	0	4199	3513	2439	69	189	561	75	70	0	0.622	0.626	0.616	0.754	1.955	0.602	0.940	156	623	6700	5599	-0.684	2570	4130	2155	3444	0
4	9	3	"HAT2"	"YEL056W"	17120	14190	130	1636	1467	728	90	117	136	90	85	0	2887	2531	1267	67	130	371	86	84	0	0.548	0.559	0.557	0.592	1.541	0.546	0.934	120	536	4366	3841	-0.867	1546	2820	1377	2464	0
4	10	3	"YDR540C"	"YDR540C"	17330	14180	140	1822	1761	924	88	92	36	99	96	0	2528	2323	1341	66	70	60	92	89	0	0.704	0.741	0.744	0.899	2.045	0.710	0.919	156	631	4196	3930	-0.506	1734	2462	1673	2257	0
4	11	3	"SNU13"	"YEL026W"	17540	14170	140	7377	6192	3038	87	89	24	100	100	0	4597	3714	1941	66	73	104	94	93	0	1.609	1.674	1.696	1.842	1.888	1.697	0.898	156	629	11821	9753	0.686	7290	4531	6105	3648	0
4	12	3	"PCM1"	"YEL058W"	17730	14170	130	2318	2178	869	87	92	44	100	100	0	7168	6310	2746	67	90	164	98	95	0	0.314	0.335	0.332	0.372	1.602	0.321	0.953	120	573	9332	8334	-1.670	2231	7101	2091	6243	0
4	13	3	"YDR542W"	"YDR542W"	17920	14170	130	11057	9698	3847	87	94	49	100	100	0	20517	17385	7288	66	88	158	97	95	0	0.536	0.555	0.553	0.606	1.690	0.540	0.957	120	579	31421	26930	-0.899	10970	20451	9611	17319	0
4	14	3	"YEL028W"	"YEL028W"	18120	14160	140	1352	1310	639	92	98	47	97	95	0	2764	2586	1479	66	79	130	91	88	0	0.467	0.483	0.480	0.571	2.002	0.451	0.921	156	719	3958	3738	-1.098	1260	2698	1218	2520	0
4	15	3	"YEL059W"	"YEL059W"	18350	14150	90	313	864	1004	91	95	29	90	86	0	469	1458	1978	69	69	30	92	84	0	0.555	0.557	0.597	0.640	2.347	0.495	0.852	52	393	622	2162	-0.849	222	400	773	1389	0
4	16	3	"YDR544C"	"YDR544C"	18540	14160	140	17333	14392	7153	89	95	59	100	99	0	36318	28710	15200	68	77	150	98	96	0	0.476	0.499	0.499	0.571	1.813	0.485	0.958	156	652	53494	42945	-1.072	17244	36250	14303	28642	0
4	17	3	"ECM10"	"YEL030W"	18720	14150	130	5589	4870	1779	89	96	62	100	100	0	8976	7692	2979	65	74	140	98	98	0	0.617	0.627	0.634	0.664	1.490	0.609	0.956	120	586	14411	12408	-0.696	5500	8911	4781	7627	0
4	18	3	"CIN8"	"YEL061C"	18950	14150	130	830	1175	1997	88	92	30	99	99	0	1538	1933	2467	63	69	75	98	97	0	0.503	0.581	0.503	0.517	1.697	0.738	0.926	120	650	2217	2957	-0.991	742	1475	1087	1870	0
4	19	3	"YFR022W"	"YFR022W"	19150	14150	120	6854	5569	2878	88	94	47	95	95	0	11910	9578	5242	64	77	102	89	87	0	0.571	0.576	0.574	0.655	1.681	0.567	0.960	120	511	18612	14995	-0.808	6766	11846	5481	9514	0
4	20	3	"RPN12"	"YFR052W"	19330	14140	140	1791	1542	738	89	96	51	96	94	0	5588	4536	2411	66	95	307	89	85	0	0.308	0.325	0.325	0.386	2.078	0.310	0.949	156	587	7224	5923	-1.698	1702	5522	1453	4470	0
4	21	3	"CWH41"	"YGL027C"	19520	14140	130	10206	9090	3297	91	129	400	97	95	0	14678	12699	5086	67	151	738	95	93	0	0.692	0.712	0.705	0.764	1.535	0.689	0.954	120	668	24726	21631	-0.531	10115	14611	8999	12632	0
4	1	4	"YFR024C"	"YFR024C"	15530	14410	140	4699	3972	1859	89	91	24	98	98	0	6312	5364	2705	66	65	43	96	95	0	0.738	0.733	0.737	0.798	1.581	0.711	0.968	156	721	10856	9181	-0.438	4610	6246	3883	5298	0
4	2	4	"YFR054C"	"YFR054C"	15740	14410	140	550	531	196	87	89	24	98	96	0	3947	3312	1379	68	68	38	97	96	0	0.119	0.137	0.136	0.149	1.749	0.130	0.894	156	646	4342	3688	-3.067	463	3879	444	3244	0
4	3	4	"CGR1"	"YGL029W"	15950	14400	140	1070	946	349	87	90	24	99	98	0	2243	1908	783	67	66	29	98	98	0	0.452	0.467	0.469	0.492	1.503	0.453	0.952	156	612	3159	2700	-1.146	983	2176	859	1841	0
4	4	4	"HIS2"	"YFR025C"	16160	14400	140	2577	2224	925	87	90	24	98	98	0	5911	4903	2094	67	70	70	94	93	0	0.426	0.442	0.444	0.490	1.731	0.435	0.965	156	635	8334	6973	-1.231	2490	5844	2137	4836	0
4	5	4	"YFR056C"	"YFR056C"	16370	14400	140	1319	1149	533	89	92	24	99	99	0	2995	2506	1314	69	72	74	98	96	0	0.420	0.435	0.444	0.486	1.621	0.416	0.947	156	514	4156	3497	-1.250	1230	2926	1060	2437	0
4	6	4	"RPL24A"	"YGL031C"	16540	14390	140	1626	1488	560	90	93	26	100	98	0	3392	3024	1190	66	66	38	99	97	0	0.462	0.473	0.487	0.499	1.430	0.465	0.953	156	581	4862	4356	-1.115	1536	3326	1398	2958	0
4	7	4	"ECO1"	"YFR027W"	16760	14390	130	4664	4139	1461	89	91	26	100	99	0	8178	7072	2688	63	63	30	99	99	0	0.564	0.578	0.582	0.628	1.587	0.564	0.969	120	599	12690	11059	-0.827	4575	8115	4050	7009	0
4	8	4	"YGL001C"	"YGL001C"	16940	14390	140	12921	10943	4841	89	110	133	99	96	0	5961	4929	2352	67	79	87	93	92	0	2.177	2.232	2.207	2.410	1.471	2.191	0.978	156	572	18726	15716	1.122	12832	5894	10854	4862	0
4	9	4	"HOP2"	"YGL033W"	17140	14380	140	2299	2223	977	91	110	131	98	94	0	4511	4118	1923	66	86	172	94	92	0	0.497	0.526	0.525	0.580	1.658	0.510	0.939	156	589	6653	6184	-1.009	2208	4445	2132	4052	0
4	10	4	"MRP13"	"YGR084C"	17350	14380	140	1603	1422	688	89	89	24	97	94	0	8362	6577	3481	65	72	149	92	89	0	0.182	0.205	0.209	0.239	1.750	0.198	0.957	156	615	9811	7845	-2.454	1514	8297	1333	6512	0
4	11	4	"SPT6"	"YGR116W"	17540	14380	130	394	484	351	87	89	23	90	88	0	928	1151	897	66	66	36	90	89	0	0.356	0.366	0.359	0.380	1.719	0.362	0.914	120	561	1169	1482	-1.489	307	862	397	1085	0
4	12	4	"RPL24B"	"YGR148C"	17730	14370	130	2925	2519	945	88	94	47	98	98	0	5850	4881	2032	66	85	165	96	95	0	0.490	0.505	0.506	0.532	1.299	0.485	0.965	120	582	8621	7246	-1.028	2837	5784	2431	4815	0
4	13	4	"YGR086C"	"YGR086C"	17930	14370	130	3760	3361	1242	88	100	67	99	97	0	6521	5614	2176	66	99	200	95	93	0	0.569	0.590	0.591	0.659	1.853	0.576	0.969	120	630	10127	8821	-0.814	3672	6455	3273	5548	0
4	14	4	"RPS23A"	"YGR118W"	18150	14360	140	5506	4718	1908	88	98	61	100	100	0	8331	6901	2941	65	83	148	96	94	0	0.655	0.677	0.683	0.743	1.568	0.669	0.969	156	636	13684	11466	-0.609	5418	8266	4630	6836	0
4	15	4	"YGR150C"	"YGR150C"	18330	14360	130	807	944	579	87	91	26	100	98	0	1306	1619	1132	66	66	29	98	98	0	0.581	0.552	0.561	0.583	1.655	0.528	0.939	120	613	1960	2410	-0.784	720	1240	857	1553	0
4	16	4	"CTT1"	"YGR088W"	18550	14360	130	7216	6066	2714	89	96	63	97	95	0	11179	8952	4331	68	91	207	90	89	0	0.641	0.673	0.669	0.763	1.651	0.672	0.946	120	589	18238	14861	-0.641	7127	11111	5977	8884	0
4	17	4	"SEC35"	"YGR120C"	18740	14350	140	3949	3375	2053	90	96	60	91	87	0	6329	4927	3216	65	81	161	82	80	0	0.616	0.676	0.658	0.811	1.912	0.652	0.949	156	635	10123	8147	-0.699	3859	6264	3285	4862	0
4	18	4	"RSR1"	"YGR152C"	18940	14340	130	5084	4197	2899	88	97	96	91	85	0	6512	5134	3630	64	68	64	85	84	0	0.775	0.810	0.804	1.020	2.377	0.774	0.938	120	585	11444	9179	-0.368	4996	6448	4109	5070	0
4	19	4	"YGR090W"	"YGR090W"	19150	14350	130	3969	3740	2300	88	99	98	94	91	0	5737	5669	3701	67	79	84	89	87	0	0.684	0.652	0.639	0.774	1.820	0.632	0.946	120	613	9551	9254	-0.547	3881	5670	3652	5602	0
4	20	4	"YGR122W"	"YGR122W"	19350	14330	130	3413	2908	1419	90	96	59	95	94	0	8446	6760	3500	65	86	170	92	91	0	0.396	0.421	0.419	0.463	1.564	0.414	0.957	120	570	11704	9513	-1.335	3323	8381	2818	6695	0
4	21	4	"YGR154C"	"YGR154C"	19550	14340	130	1240	1218	489	90	94	58	95	95	0	5515	5352	2367	65	84	195	95	95	0	0.211	0.213	0.220	0.230	1.479	0.202	0.935	120	680	6600	6415	-2.245	1150	5450	1128	5287	0
4	1	5	"ORC6"	"YHR118C"	15560	14610	120	1016	1017	452	90	92	23	99	97	0	2239	2155	1035	67	89	582	88	79	0	0.426	0.444	0.440	0.460	1.739	0.314	0.631	120	624	3098	3015	-1.230	926	2172	927	2088	0
4	2	5	"IMP3"	"YHR148W"	15770	14610	130	1145	1042	337	91	102	106	98	95	0	1221	1109	348	70	120	647	85	19	0	0.916	0.915	0.920	0.935	1.502	0.400	0.329	120	598	2205	1990	-0.127	1054	1151	951	1039	0
4	3	5	"YHR180W"	"YHR180W"	15950	14600	120	394	554	407	90	91	24	95	93	0	950	1647	1591	68	67	29	95	95	0	0.345	0.294	0.305	0.335	2.096	0.260	0.901	120	511	1186	2043	-1.537	304	882	464	1579	0
4	4	5	"MSH1"	"YHR120W"	16160	14610	130	555	582	278	88	91	25	99	99	0	889	968	537	67	68	32	95	95	0	0.568	0.548	0.531	0.574	1.642	0.471	0.810	120	605	1289	1395	-0.816	467	822	494	901	0
4	5	5	"YHR150W"	"YHR150W"	16360	14600	140	737	715	345	88	92	26	98	96	0	2891	2645	1435	70	75	60	95	94	0	0.230	0.243	0.240	0.256	1.870	0.233	0.919	156	587	3470	3202	-2.120	649	2821	627	2575	0
4	6	5	"YHR182W"	"YHR182W"	16550	14590	130	229	233	89	88	93	42	92	75	0	704	684	366	67	79	122	90	84	0	0.221	0.235	0.220	0.236	1.889	0.200	0.689	120	579	778	762	-2.176	141	637	145	617	0
4	7	5	"YHR122W"	"YHR122W"	16760	14600	130	755	726	293	84	88	25	98	97	0	2812	2650	1210	64	70	132	94	92	0	0.244	0.248	0.246	0.266	1.828	0.229	0.862	120	630	3419	3228	-2.034	671	2748	642	2586	0
4	8	5	"SPO12"	"YHR152W"	16960	14590	130	1751	1615	604	85	91	45	98	96	0	4113	3506	1475	67	76	137	97	95	0	0.412	0.445	0.446	0.475	1.479	0.413	0.908	120	548	5712	4969	-1.280	1666	4046	1530	3439	0
4	9	5	"SSP1"	"YHR184W"	17140	14570	130	920	872	281	89	92	43	98	97	0	2134	1966	683	66	73	119	98	96	0	0.402	0.412	0.411	0.417	1.313	0.387	0.876	120	558	2899	2683	-1.315	831	2068	783	1900	0
4	10	5	"NDT80"	"YHR124W"	17350	14570	130	867	973	481	88	89	23	100	99	0	3134	3273	1598	66	68	108	97	95	0	0.254	0.276	0.272	0.292	1.561	0.269	0.906	120	614	3847	4092	-1.978	779	3068	885	3207	0
4	11	5	"ESC4"	"YHR154W"	17560	14580	130	1299	1454	862	87	89	24	98	97	0	2990	3528	2148	66	63	23	97	97	0	0.415	0.395	0.401	0.401	1.810	0.386	0.929	120	591	4136	4829	-1.271	1212	2924	1367	3462	0
4	12	5	"YHR186C"	"YHR186C"	17740	14560	130	528	644	403	89	92	29	95	95	0	824	1095	863	65	73	123	90	85	0	0.578	0.539	0.540	0.613	1.890	0.483	0.866	120	585	1198	1585	-0.790	439	759	555	1030	0
4	13	5	"YJL058C"	"YJL058C"	17950	14570	130	3523	3002	1324	89	97	56	97	94	0	10005	8269	3836	65	100	231	94	93	0	0.345	0.355	0.351	0.370	1.678	0.344	0.926	120	627	13374	11117	-1.533	3434	9940	2913	8204	0
4	14	5	"DPB11"	"YJL090C"	18160	14560	140	5554	4560	2500	88	98	60	92	90	0	9469	7649	4555	66	96	209	89	87	0	0.581	0.590	0.583	0.636	2.006	0.562	0.924	156	613	14869	12055	-0.783	5466	9403	4472	7583	0
4	15	5	"YJL122W"	"YJL122W"	18350	14550	130	2026	1778	701	86	91	33	100	98	0	6402	5274	2314	66	66	32	98	98	0	0.306	0.325	0.324	0.350	1.840	0.305	0.922	120	547	8276	6900	-1.708	1940	6336	1692	5208	0
4	16	5	"YJL060W"	"YJL060W"	18540	14560	130	1410	1275	504	88	93	30	96	95	0	7906	6589	2753	66	79	130	96	95	0	0.169	0.182	0.186	0.192	1.771	0.172	0.922	120	635	9162	7710	-2.568	1322	7840	1187	6523	0
4	17	5	"HPR5"	"YJL092W"	18780	14550	140	4241	3645	1550	88	92	30	100	99	0	12274	10134	4273	66	83	152	98	96	0	0.340	0.353	0.355	0.369	1.739	0.345	0.925	156	634	16361	13625	-1.556	4153	12208	3557	10068	0
4	18	5	"LSM1"	"YJL124C"	18950	14550	140	2360	2000	898	87	95	94	92	91	0	7718	6203	3016	67	73	91	92	92	0	0.297	0.312	0.315	0.350	1.887	0.298	0.922	156	621	9924	8049	-1.751	2273	7651	1913	6136	0
4	19	5	"LAS21"	"YJL062W"	19170	14550	140	4010	3487	1587	88	91	30	100	99	0	12778	10890	5462	67	70	58	98	96	0	0.309	0.314	0.314	0.343	1.735	0.299	0.935	156	580	16633	14222	-1.696	3922	12711	3399	10823	0
4	20	5	"YJL094C"	"YJL094C"	19350	14540	140	10170	9380	3890	89	94	53	100	100	0	12518	11253	5220	65	85	176	97	95	0	0.810	0.830	0.808	0.917	1.731	0.801	0.913	156	609	22534	20479	-0.305	10081	12453	9291	11188	0
4	21	5	"NIT2"	"YJL126W"	19560	14540	140	3385	2873	1218	87	89	24	99	98	0	12803	10586	4974	66	69	75	98	97	0	0.259	0.265	0.257	0.288	1.694	0.249	0.919	156	777	16035	13306	-1.949	3298	12737	2786	10520	0
4	1	6	"YJL064W"	"YJL064W"	15560	14820	140	920	880	393	88	91	27	98	94	0	3307	2984	1543	66	85	512	87	84	0	0.257	0.271	0.266	0.308	2.010	0.231	0.814	156	806	4073	3710	-1.962	832	3241	792	2918	0
4	2	6	"MRPL49"	"YJL096W"	15770	14820	130	1986	1753	746	91	106	109	96	94	0	4112	3595	1653	71	117	308	93	90	0	0.469	0.472	0.473	0.490	1.320	0.456	0.948	120	611	5936	5186	-1.093	1895	4041	1662	3524	0
4	3	6	"PBS2"	"YJL128C"	15970	14800	140	1443	1329	550	91	104	104	96	93	0	5266	4693	2186	70	107	286	95	94	0	0.260	0.268	0.277	0.299	1.790	0.258	0.952	156	675	6548	5861	-1.942	1352	5196	1238	4623	0
4	4	6	"YKL054C"	"YKL054C"	16170	14810	120	194	200	76	89	91	25	90	75	0	321	329	163	67	67	37	91	88	0	0.413	0.424	0.403	0.391	2.528	0.389	0.660	120	493	359	373	-1.274	105	254	111	262	0
4	5	6	"YKL086W"	"YKL086W"	16370	14800	140	1705	1630	761	88	92	26	99	97	0	4248	4041	2187	70	75	61	95	93	0	0.387	0.388	0.398	0.440	1.632	0.370	0.960	156	598	5795	5513	-1.369	1617	4178	1542	3971	0
4	6	6	"SBA1"	"YKL117W"	16550	14800	130	1603	1523	700	88	96	44	99	97	0	3989	3760	1849	70	89	166	95	93	0	0.387	0.389	0.389	0.444	1.877	0.380	0.969	120	575	5434	5125	-1.371	1515	3919	1435	3690	0
4	7	6	"YKL056C"	"YKL056C"	16770	14790	120	950	843	352	88	94	46	94	92	0	2967	2511	1235	69	91	171	91	89	0	0.297	0.309	0.313	0.342	1.619	0.290	0.933	120	540	3760	3197	-1.749	862	2898	755	2442	0
4	8	6	"YKL088W"	"YKL088W"	16970	14790	140	4464	4027	2016	87	91	31	99	98	0	7848	6884	3633	69	84	144	93	92	0	0.563	0.578	0.583	0.686	1.918	0.567	0.972	156	616	12156	10755	-0.830	4377	7779	3940	6815	0
4	9	6	"VPH2"	"YKL119C"	17160	14780	140	2399	2116	849	89	92	28	100	99	0	3863	3249	1438	67	79	139	97	92	0	0.609	0.637	0.631	0.702	1.678	0.616	0.956	156	675	6106	5209	-0.717	2310	3796	2027	3182	0
4	10	6	"TOA2"	"YKL058W"	17390	14770	130	1859	1657	581	87	90	24	100	100	0	4174	3700	1396	65	68	82	98	98	0	0.431	0.432	0.431	0.451	1.345	0.415	0.966	120	605	5881	5205	-1.213	1772	4109	1570	3635	0
4	11	6	"YKL090W"	"YKL090W"	17560	14780	130	986	937	410	88	89	24	97	96	0	2027	1986	1006	65	66	46	95	95	0	0.458	0.442	0.445	0.467	1.389	0.420	0.941	120	528	2860	2770	-1.128	898	1962	849	1921	0
4	12	6	"YKL121W"	"YKL121W"	17770	14770	140	534	576	288	88	90	24	96	94	0	1654	1724	969	65	70	68	94	93	0	0.281	0.294	0.288	0.302	1.461	0.284	0.923	156	661	2035	2147	-1.833	446	1589	488	1659	0
4	13	6	"FBA1"	"YKL060C"	17970	14770	130	2819	2572	1034	88	92	33	99	98	0	3824	3527	1494	66	80	144	95	95	0	0.727	0.718	0.717	0.741	1.237	0.704	0.972	120	579	6489	5945	-0.461	2731	3758	2484	3461	0
4	14	6	"BUD2"	"YKL092C"	18170	14760	140	2077	2151	1061	87	93	35	98	98	0	3581	3466	1763	67	69	41	98	96	0	0.566	0.607	0.612	0.652	1.649	0.598	0.953	156	615	5504	5463	-0.820	1990	3514	2064	3399	0
4	15	6	"YKL123W"	"YKL123W"	18370	14760	140	1420	1247	558	87	91	33	98	95	0	3905	3334	1700	66	68	96	94	92	0	0.347	0.355	0.356	0.404	1.701	0.341	0.959	156	590	5172	4428	-1.526	1333	3839	1160	3268	0
4	16	6	"RIC1"	"YLR039C"	18570	14760	130	1714	1662	685	89	94	37	97	96	0	2781	2738	1211	66	87	298	95	92	0	0.599	0.589	0.586	0.606	1.267	0.578	0.959	120	542	4340	4245	-0.741	1625	2715	1573	2672	0
4	17	6	"RGR1"	"YLR071C"	18760	14750	130	1210	1220	591	88	93	38	98	97	0	3196	3042	1675	68	90	292	94	90	0	0.359	0.381	0.382	0.421	1.462	0.356	0.925	120	593	4250	4106	-1.479	1122	3128	1132	2974	0
4	18	6	"CDC45"	"YLR103C"	18970	14750	130	2092	2003	810	88	90	27	100	97	0	4804	4598	2009	68	79	207	96	95	0	0.423	0.423	0.428	0.433	1.270	0.410	0.959	120	539	6740	6445	-1.241	2004	4736	1915	4530	0
4	19	6	"YLR041W"	"YLR041W"	19160	14740	140	2275	1946	872	89	92	26	99	98	0	4591	3630	1808	67	68	48	95	94	0	0.483	0.521	0.520	0.589	1.722	0.505	0.969	156	576	6710	5420	-1.049	2186	4524	1857	3563	0
4	20	6	"YLR073C"	"YLR073C"	19360	14740	130	3675	3366	1369	89	93	28	99	97	0	5120	4581	1975	67	71	80	96	95	0	0.710	0.726	0.722	0.770	1.528	0.714	0.974	120	590	8639	7791	-0.495	3586	5053	3277	4514	0
4	21	6	"SEN2"	"YLR105C"	19570	14730	130	3498	3100	1210	90	92	27	99	99	0	11697	9691	4177	68	70	68	98	98	0	0.293	0.313	0.309	0.336	1.435	0.307	0.968	120	690	15037	12633	-1.771	3408	11629	3010	9623	0
4	1	7	"TRX1"	"YLR043C"	15580	15010	130	1818	1535	734	89	93	30	96	95	0	2363	1871	960	69	76	68	94	94	0	0.754	0.802	0.781	0.830	1.648	0.780	0.947	120	692	4023	3248	-0.408	1729	2294	1446	1802	0
4	2	7	"RPL10"	"YLR075W"	15790	15020	130	611	567	215	89	95	36	95	92	0	2973	2582	1171	71	96	177	94	93	0	0.180	0.190	0.191	0.210	1.734	0.176	0.884	120	615	3424	2989	-2.475	522	2902	478	2511	0
4	3	7	"YLR107W"	"YLR107W"	15990	15010	130	1366	1352	619	89	92	31	99	96	0	2541	2326	1126	71	84	115	95	94	0	0.517	0.560	0.569	0.585	1.519	0.545	0.932	120	562	3747	3518	-0.952	1277	2470	1263	2255	0
4	4	7	"STU2"	"YLR045C"	16180	15000	140	5369	4700	1936	89	90	25	100	100	0	8813	7299	3410	67	68	37	98	97	0	0.604	0.638	0.632	0.736	1.794	0.611	0.957	156	568	14026	11843	-0.728	5280	8746	4611	7232	0
4	5	7	"YLR077W"	"YLR077W"	16370	15000	130	1904	1702	722	89	91	25	99	99	0	8062	6977	3328	70	74	49	98	98	0	0.227	0.234	0.231	0.254	1.552	0.222	0.953	120	527	9807	8520	-2.139	1815	7992	1613	6907	0
4	6	7	"AHP1"	"YLR109W"	16590	14990	140	714	666	294	90	92	27	97	93	0	3941	3408	1746	71	80	118	96	95	0	0.161	0.173	0.176	0.190	1.925	0.165	0.909	156	633	4494	3913	-2.633	624	3870	576	3337	0
4	7	7	"YLR422W"	"YLR422W"	16770	14980	130	1132	1161	497	88	89	24	100	98	0	1969	1928	982	67	67	31	100	98	0	0.549	0.577	0.580	0.613	1.460	0.545	0.936	120	559	2946	2934	-0.865	1044	1902	1073	1861	0
4	8	7	"YLR454W"	"YLR454W"	16970	14990	130	771	813	389	87	89	27	99	98	0	1731	1937	1094	68	74	72	97	95	0	0.411	0.388	0.388	0.428	1.705	0.366	0.927	120	597	2347	2595	-1.282	684	1663	726	1869	0
4	9	7	"PPZ1"	"YML016C"	17180	14980	140	7251	6576	3600	89	92	28	100	100	0	5188	4913	2790	68	79	106	96	94	0	1.399	1.339	1.358	1.460	1.529	1.328	0.957	156	623	12282	11332	0.484	7162	5120	6487	4845	0
4	10	7	"YLR424W"	"YLR424W"	17370	14980	130	4072	3703	1759	89	91	25	99	98	0	9655	8432	4322	66	70	86	96	96	0	0.415	0.432	0.437	0.486	1.723	0.409	0.932	120	548	13572	11980	-1.268	3983	9589	3614	8366	0
4	11	7	"YLR456W"	"YLR456W"	17570	14970	140	1254	1125	484	89	91	25	98	97	0	4233	3620	1773	66	69	40	96	96	0	0.280	0.292	0.295	0.333	2.036	0.277	0.927	156	601	5332	4590	-1.839	1165	4167	1036	3554	0
4	12	7	"YML018C"	"YML018C"	17770	14970	140	2252	2041	807	90	91	25	100	99	0	5552	4867	2066	68	72	49	99	99	0	0.394	0.407	0.409	0.431	1.448	0.394	0.937	156	608	7646	6750	-1.343	2162	5484	1951	4799	0
4	13	7	"YLR426W"	"YLR426W"	17960	14970	130	1139	1015	497	89	91	26	96	95	0	8875	7201	3847	67	78	73	96	94	0	0.119	0.130	0.131	0.149	1.987	0.123	0.925	120	581	9858	8060	-3.068	1050	8808	926	7134	0
4	14	7	"YLR458W"	"YLR458W"	18200	14960	140	1179	1045	470	87	89	25	98	96	0	3907	3249	1550	66	76	109	95	92	0	0.284	0.301	0.299	0.317	1.664	0.293	0.921	156	615	4933	4141	-1.815	1092	3841	958	3183	0
4	15	7	"YML020W"	"YML020W"	18390	14960	140	6640	6274	3275	86	89	27	100	100	0	9306	8485	4541	66	68	103	96	95	0	0.709	0.735	0.738	0.782	1.590	0.726	0.941	156	505	15794	14607	-0.496	6554	9240	6188	8419	0
4	16	7	"YLR428C"	"YLR428C"	18580	14950	140	1143	1045	426	88	91	27	98	96	0	5917	4886	2165	67	81	292	94	90	0	0.180	0.199	0.198	0.220	1.743	0.192	0.930	156	546	6905	5776	-2.471	1055	5850	957	4819	0
4	17	7	"YLR460C"	"YLR460C"	18770	14950	130	5419	4687	2018	89	92	27	100	99	0	15389	13144	6161	69	93	347	96	94	0	0.348	0.352	0.352	0.394	1.736	0.333	0.942	120	557	20650	17673	-1.523	5330	15320	4598	13075	0
4	18	7	"APT1"	"YML022W"	18980	14940	140	5239	4464	2057	88	90	25	98	98	0	6187	4961	2570	68	75	180	95	94	0	0.842	0.894	0.882	1.025	1.813	0.862	0.941	156	644	11270	9269	-0.248	5151	6119	4376	4893	0
4	19	7	"HSC82"	"YMR186W"	19170	14940	120	728	723	324	89	91	27	96	95	0	1441	1381	731	67	67	37	96	94	0	0.465	0.482	0.483	0.546	1.798	0.453	0.913	120	511	2013	1948	-1.104	639	1374	634	1314	0
4	20	7	"GUA1"	"YMR217W"	19380	14940	130	2154	2117	1131	88	91	28	99	99	0	3753	3739	2118	68	70	93	97	95	0	0.561	0.553	0.555	0.584	1.545	0.537	0.943	120	615	5751	5700	-0.835	2066	3685	2029	3671	0
4	21	7	"YMR250W"	"YMR250W"	19580	14940	130	744	704	334	86	91	26	95	94	0	1418	1246	675	68	72	70	89	87	0	0.487	0.525	0.518	0.533	1.579	0.489	0.896	120	660	2008	1796	-1.037	658	1350	618	1178	0
4	1	8	"YMR188C"	"YMR188C"	15580	15220	130	356	366	168	89	92	26	94	90	0	1335	1352	753	69	71	40	94	93	0	0.211	0.216	0.213	0.239	2.301	0.202	0.823	120	688	1533	1560	-2.245	267	1266	277	1283	0
4	2	8	"ESC1"	"YMR219W"	15790	15210	120	158	166	66	88	91	24	84	62	0	212	215	99	70	75	59	85	65	0	0.493	0.538	0.480	0.510	2.354	0.514	0.542	120	540	212	223	-1.020	70	142	78	145	0
4	3	8	"HOR7"	"YMR251W-A"	16000	15200	130	1996	1855	830	86	89	24	98	98	0	3067	2738	1253	70	69	24	97	97	0	0.637	0.663	0.678	0.681	1.666	0.662	0.922	120	607	4907	4437	-0.650	1910	2997	1769	2668	0
4	4	8	"SGS1"	"YMR190C"	16220	15190	140	547	539	249	87	88	22	96	95	0	930	882	439	69	70	47	96	93	0	0.534	0.556	0.564	0.549	1.688	0.541	0.891	156	566	1321	1265	-0.904	460	861	452	813	0
4	5	8	"YMR221C"	"YMR221C"	16410	15200	140	239	344	252	90	91	23	94	86	0	632	957	895	71	74	51	87	83	0	0.266	0.287	0.277	0.312	2.305	0.266	0.879	156	537	710	1140	-1.913	149	561	254	886	0
4	6	8	"YMR253C"	"YMR253C"	16600	15190	130	1270	1199	688	92	94	24	97	96	0	1299	1196	782	72	73	29	92	91	0	0.960	0.985	0.997	1.015	1.875	0.965	0.863	120	509	2405	2231	-0.059	1178	1227	1107	1124	0
4	7	8	"YMR192W"	"YMR192W"	16780	15190	130	453	502	248	89	91	24	96	94	0	1241	1336	791	70	70	33	93	93	0	0.311	0.326	0.329	0.349	1.651	0.308	0.917	120	608	1535	1679	-1.686	364	1171	413	1266	0
4	8	8	"UBP8"	"YMR223W"	17000	15190	130	1350	1373	721	87	90	27	99	97	0	3650	3493	1990	69	73	51	95	95	0	0.353	0.376	0.386	0.407	1.545	0.360	0.927	120	612	4844	4710	-1.504	1263	3581	1286	3424	0
4	9	8	"GFD1"	"YMR255W"	17200	15180	140	2495	2227	1027	87	90	28	98	98	0	4371	3775	1911	67	72	55	96	94	0	0.559	0.577	0.584	0.636	1.672	0.554	0.929	156	570	6712	5848	-0.838	2408	4304	2140	3708	0
4	10	8	"LAP3"	"YNL239W"	17390	15180	140	693	615	300	87	90	24	95	92	0	7959	6380	3617	66	67	45	97	94	0	0.077	0.084	0.085	0.096	1.976	0.080	0.910	156	513	8499	6842	-3.703	606	7893	528	6314	0
4	11	8	"BNI1"	"YNL271C"	17580	15180	140	594	623	366	87	90	25	94	91	0	1207	1286	930	68	68	42	89	89	0	0.445	0.440	0.444	0.503	1.940	0.398	0.881	156	613	1646	1754	-1.168	507	1139	536	1218	0
4	12	8	"YNL303W"	"YNL303W"	17800	15170	130	1484	1310	674	88	92	26	98	97	0	2649	2322	1247	70	75	53	92	91	0	0.541	0.543	0.527	0.595	1.754	0.535	0.924	120	568	3975	3474	-0.886	1396	2579	1222	2252	0
4	13	8	"ZWF1"	"YNL241C"	17990	15160	140	1260	1112	543	88	90	25	98	97	0	5362	4333	2283	68	74	53	96	95	0	0.221	0.240	0.247	0.254	1.679	0.232	0.924	156	675	6466	5289	-2.175	1172	5294	1024	4265	0
4	14	8	"TOF1"	"YNL273W"	18200	15160	130	817	789	318	85	87	23	99	98	0	2094	2093	990	66	67	49	96	95	0	0.361	0.347	0.354	0.371	1.601	0.315	0.874	120	520	2760	2731	-1.470	732	2028	704	2027	0
4	15	8	"YNL305C"	"YNL305C"	18380	15150	140	1176	1090	461	88	92	27	98	98	0	5898	5021	2292	68	67	29	98	98	0	0.187	0.202	0.206	0.216	1.604	0.194	0.911	156	540	6918	5955	-2.422	1088	5830	1002	4953	0
4	16	8	"SLA2"	"YNL243W"	18590	15140	130	2191	1964	865	89	93	28	99	98	0	10274	8464	4112	68	69	44	98	98	0	0.206	0.223	0.225	0.256	2.070	0.212	0.916	120	537	12308	10271	-2.280	2102	10206	1875	8396	0
4	17	8	"YNL275W"	"YNL275W"	18770	15140	130	6482	5555	2468	91	94	38	100	100	0	9525	7913	3906	69	89	252	95	94	0	0.676	0.697	0.699	0.787	1.827	0.666	0.935	120	576	15847	13308	-0.565	6391	9456	5464	7844	0
4	18	8	"MCK1"	"YNL307C"	18980	15140	130	4411	3914	1342	92	98	46	100	100	0	9293	7993	3029	69	86	241	96	95	0	0.468	0.482	0.478	0.522	1.695	0.462	0.935	120	622	13543	11746	-1.095	4319	9224	3822	7924	0
4	19	8	"YNL245C"	"YNL245C"	19200	15130	130	1005	878	379	91	96	53	94	92	0	6530	5198	2663	68	71	92	95	93	0	0.141	0.153	0.152	0.176	2.077	0.144	0.906	120	642	7376	5917	-2.822	914	6462	787	5130	0
4	20	8	"MET2"	"YNL277W"	19410	15130	130	3455	2913	1282	89	94	52	99	97	0	10482	8652	4047	68	71	95	97	97	0	0.323	0.329	0.337	0.361	1.624	0.321	0.932	120	569	13780	11408	-1.629	3366	10414	2824	8584	0
4	21	8	"STB1"	"YNL309W"	19590	15130	140	3344	2898	1387	86	89	33	100	100	0	12459	10396	5292	68	66	30	100	99	0	0.263	0.272	0.276	0.290	1.529	0.262	0.937	156	726	15649	13140	-1.927	3258	12391	2812	10328	0
4	1	9	"YOR041C"	"YOR041C"	15600	15410	140	713	655	242	90	91	24	100	99	0	3146	2636	1167	67	66	22	100	99	0	0.202	0.220	0.216	0.235	1.565	0.209	0.929	156	669	3702	3134	-2.305	623	3079	565	2569	0
4	2	9	"YOR073W"	"YOR073W"	15780	15400	140	1725	1638	724	91	93	24	100	100	0	3009	2696	1262	70	74	85	97	95	0	0.556	0.589	0.589	0.609	1.384	0.575	0.950	156	542	4573	4173	-0.847	1634	2939	1547	2626	0
4	3	9	"YOR105W"	"YOR105W"	15980	15400	140	381	372	115	88	92	26	99	98	0	2216	1963	659	70	75	95	100	99	0	0.137	0.150	0.151	0.148	1.496	0.141	0.853	156	651	2439	2177	-2.873	293	2146	284	1893	0
4	4	9	"WHI2"	"YOR043W"	16190	15390	130	2829	2578	1287	88	90	25	98	97	0	4403	3858	2046	69	72	72	95	93	0	0.632	0.657	0.668	0.732	1.682	0.637	0.964	120	595	7075	6279	-0.661	2741	4334	2490	3789	0
4	5	9	"UFE1"	"YOR075W"	16390	15390	140	4183	3584	1748	88	89	22	100	100	0	5290	4416	2308	72	71	46	97	96	0	0.785	0.805	0.805	0.903	1.702	0.785	0.961	156	564	9313	7840	-0.350	4095	5218	3496	4344	0
4	6	9	"YOR107W"	"YOR107W"	16580	15390	140	1309	1212	537	90	91	24	98	97	0	3797	3295	1617	72	71	22	98	96	0	0.327	0.348	0.350	0.378	1.604	0.335	0.952	156	597	4944	4345	-1.612	1219	3725	1122	3223	0
4	7	9	"TOM6"	"YOR045W"	16790	15390	140	789	719	322	88	90	24	98	96	0	1493	1223	614	70	70	31	94	91	0	0.493	0.547	0.548	0.612	1.848	0.528	0.933	156	635	2124	1784	-1.021	701	1423	631	1153	0
4	8	9	"RTS2"	"YOR077W"	16990	15380	130	1156	1042	446	87	91	37	97	95	0	3924	3257	1569	68	68	34	97	94	0	0.277	0.299	0.297	0.331	1.690	0.283	0.941	120	591	4925	4144	-1.851	1069	3856	955	3189	0
4	9	9	"INP53"	"YOR109W"	17210	15370	130	1888	1779	917	87	91	38	98	95	0	3935	3527	1878	66	66	39	96	95	0	0.465	0.489	0.501	0.530	1.609	0.478	0.947	120	558	5670	5153	-1.103	1801	3869	1692	3461	0
4	10	9	"STD1"	"YOR047C"	17400	15370	140	6551	5644	2726	87	89	22	100	100	0	6971	5846	3051	66	67	53	97	96	0	0.936	0.961	0.971	1.092	1.785	0.935	0.955	156	529	13369	11337	-0.095	6464	6905	5557	5780	0
4	11	9	"ATX2"	"YOR079C"	17590	15370	130	2857	2559	1112	86	89	25	100	100	0	5399	4778	2230	67	66	41	100	100	0	0.520	0.525	0.522	0.551	1.350	0.499	0.944	120	538	8103	7184	-0.944	2771	5332	2473	4711	0
4	12	9	"YOR111W"	"YOR111W"	17800	15370	130	2215	1955	928	87	90	26	98	97	0	4302	3709	1889	68	70	52	95	93	0	0.503	0.513	0.509	0.553	1.569	0.494	0.952	120	581	6362	5509	-0.993	2128	4234	1868	3641	0
4	13	9	"YPL030W"	"YPL030W"	17980	15370	130	2592	2580	1496	86	89	26	99	99	0	3831	3795	2382	69	70	48	98	97	0	0.666	0.669	0.688	0.704	1.486	0.645	0.942	120	579	6268	6220	-0.586	2506	3762	2494	3726	0
4	14	9	"YPL062W"	"YPL062W"	18200	15360	140	522	471	202	86	91	27	97	96	0	2381	2061	1080	69	72	64	95	93	0	0.189	0.193	0.193	0.214	1.754	0.181	0.887	156	693	2748	2377	-2.407	436	2312	385	1992	0
4	15	9	"SEC62"	"YPL094C"	18410	15350	140	1934	1679	703	89	93	27	98	98	0	6944	5771	2681	70	72	52	98	97	0	0.268	0.279	0.281	0.301	1.652	0.268	0.950	156	640	8719	7291	-1.898	1845	6874	1590	5701	0
4	16	9	"SVL3"	"YPL032C"	18580	15340	130	4712	4394	1972	90	92	26	100	100	0	7437	6676	3265	68	68	43	98	97	0	0.627	0.651	0.656	0.739	1.907	0.625	0.943	120	544	11991	10912	-0.673	4622	7369	4304	6608	0
4	17	9	"YPL064C"	"YPL064C"	18790	15350	140	1995	2009	1221	92	94	35	99	98	0	4155	4031	2826	68	82	232	91	85	0	0.466	0.484	0.493	0.563	1.798	0.454	0.945	156	664	5990	5880	-1.103	1903	4087	1917	3963	0
4	18	9	"YPL096W"	"YPL096W"	18990	15340	140	7446	6768	3332	92	93	27	100	100	0	10738	9241	4612	68	71	86	99	99	0	0.689	0.728	0.721	0.751	1.524	0.722	0.955	156	612	18024	15849	-0.537	7354	10670	6676	9173	0
4	19	9	"YPL034W"	"YPL034W"	19190	15340	140	4620	3835	2080	90	97	70	98	97	0	5941	4762	2684	68	67	28	97	97	0	0.771	0.798	0.808	0.864	1.719	0.786	0.947	156	710	10403	8439	-0.375	4530	5873	3745	4694	0
4	20	9	"YPL066W"	"YPL066W"	19420	15340	130	6786	5861	2982	89	98	77	99	99	0	12996	10503	5583	68	66	23	100	100	0	0.518	0.553	0.558	0.609	1.638	0.545	0.944	120	613	19625	16207	-0.949	6697	12928	5772	10435	0
4	21	9	"YPL098C"	"YPL098C"	19610	15330	130	3755	3262	1800	88	93	45	100	99	0	7345	5913	3265	67	65	23	100	98	0	0.504	0.543	0.549	0.587	1.688	0.541	0.948	120	612	10945	9020	-0.989	3667	7278	3174	5846	0
4	1	10	"PMA2"	"YPL036W"	15590	15610	140	1417	1328	730	90	91	26	96	94	0	2424	2239	1456	68	69	45	93	91	0	0.563	0.570	0.587	0.673	1.808	0.526	0.894	156	748	3683	3409	-0.828	1327	2356	1238	2171	0
4	2	10	"YPL068C"	"YPL068C"	15790	15600	140	2343	2162	1187	90	93	26	99	99	0	4615	3954	2324	71	73	79	99	96	0	0.496	0.534	0.535	0.568	1.469	0.517	0.935	156	632	6797	5955	-1.012	2253	4544	2072	3883	0
4	3	10	"YPL100W"	"YPL100W"	16010	15600	130	415	433	196	87	91	26	97	95	0	662	738	398	68	67	19	99	98	0	0.552	0.516	0.533	0.521	1.693	0.464	0.829	120	612	922	1016	-0.857	328	594	346	670	0
4	4	10	"NAT3"	"YPR131C"	16210	15600	130	582	546	228	87	89	24	97	95	0	2133	1903	905	67	68	51	96	95	0	0.240	0.250	0.246	0.278	1.774	0.232	0.897	120	580	2561	2295	-2.061	495	2066	459	1836	0
4	5	10	"TIF3"	"YPR163C"	16390	15590	130	584	586	295	87	88	23	98	97	0	2253	2309	1437	69	69	51	97	95	0	0.228	0.223	0.219	0.249	1.981	0.202	0.886	120	602	2681	2739	-2.136	497	2184	499	2240	0
4	6	10	"YPR195C"	"YPR195C"	16630	15590	130	330	321	127	88	89	23	95	90	0	534	492	229	70	68	35	92	90	0	0.522	0.552	0.553	0.568	1.799	0.520	0.813	120	577	706	655	-0.939	242	464	233	422	0
4	7	10	"YPR133C"	"YPR133C"	16800	15590	130	322	311	124	86	88	24	93	89	0	1103	1061	567	70	69	43	90	88	0	0.228	0.227	0.225	0.266	2.161	0.206	0.849	120	525	1269	1216	-2.130	236	1033	225	991	0
4	8	10	"RHO1"	"YPR165W"	17000	15580	140	2260	1933	904	85	87	24	100	98	0	5052	4113	2017	69	71	88	96	94	0	0.436	0.457	0.464	0.495	1.642	0.444	0.933	156	631	7158	5892	-1.196	2175	4983	1848	4044	0
4	9	10	"YPR197C"	"YPR197C"	17200	15580	140	1847	1708	875	85	88	35	98	98	0	2733	2439	1319	66	67	80	95	92	0	0.661	0.684	0.687	0.715	1.562	0.668	0.946	156	649	4429	3996	-0.598	1762	2667	1623	2373	0
4	10	10	"CTF4"	"YPR135W"	17400	15570	120	165	228	164	84	87	23	82	68	0	172	374	405	66	66	37	81	62	0	0.764	0.468	0.494	0.517	2.192	0.398	0.825	120	475	187	452	-0.388	81	106	144	308	0
4	11	10	"MET16"	"YPR167C"	17580	15570	150	102	148	151	86	93	62	19	12	0	90	192	348	67	69	58	23	14	0	0.696	0.496	0.593	0.710	3.272	0.407	0.752	156	669	39	187	-0.524	16	23	62	125	-50
4	12	10	"ARR1"	"YPR199C"	17790	15560	130	108	113	34	86	89	28	42	20	0	135	126	47	67	68	51	68	15	0	0.324	0.458	0.523	0.445	2.656	0.124	0.036	120	598	90	86	-1.628	22	68	27	59	0
4	13	10	"RRP9"	"YPR137W"	17990	15560	130	190	287	269	87	90	27	82	75	0	212	435	573	67	71	57	81	60	0	0.710	0.543	0.598	0.598	2.339	0.478	0.916	120	645	248	568	-0.493	103	145	200	368	0
4	14	10	"YPR169W"	"YPR169W"	18210	15560	130	3557	3004	1307	86	90	27	98	98	0	9590	8140	3800	68	75	73	97	96	0	0.365	0.361	0.368	0.407	1.530	0.349	0.974	120	631	12993	10990	-1.456	3471	9522	2918	8072	0
4	15	10	"ARR3"	"YPR201W"	18410	15560	110	118	129	43	87	91	27	53	31	0	192	179	79	68	76	68	73	41	0	0.250	0.378	0.446	0.364	2.279	0.351	0.341	80	499	155	153	-2.000	31	124	42	111	0
4	16	10	"CEN1"	"CEN1"	18620	15550	140	573	517	234	87	90	28	94	91	0	293	271	119	66	70	60	85	71	0	2.141	2.098	2.131	1.997	1.664	2.009	0.687	156	699	713	635	1.098	486	227	430	205	0
4	17	10	"YBL091C-A"	"YBL091C-A"	18820	15550	130	860	773	363	88	90	28	92	88	0	4354	3622	1868	66	70	68	94	91	0	0.180	0.193	0.195	0.201	1.741	0.184	0.948	120	534	5060	4241	-2.474	772	4288	685	3556	0
4	18	10	"YBLWdelta8"	"YBLWdelta8"	19030	15540	150	983	884	433	88	90	26	95	93	0	1123	960	506	68	69	56	87	86	0	0.848	0.892	0.883	0.924	1.489	0.866	0.954	156	598	1950	1688	-0.237	895	1055	796	892	0
4	19	10	"YCRCtau1"	"YCRCtau1"	19200	15540	110	195	213	89	88	91	29	88	71	0	259	278	120	68	70	59	95	77	0	0.560	0.595	0.552	0.528	1.717	0.495	0.548	80	424	298	335	-0.836	107	191	125	210	0
4	20	10	"SNR189"	"SNR189"	19410	15530	130	261	263	91	87	94	65	85	67	0	955	858	332	69	68	30	95	93	0	0.196	0.223	0.222	0.229	1.855	0.213	0.781	120	614	1060	965	-2.348	174	886	176	789	0
4	21	10	"YCRWomega3"	"YCRWomega3"	19600	15530	140	2357	2029	903	87	91	37	100	98	0	3321	2737	1333	68	66	21	99	98	0	0.698	0.728	0.729	0.789	1.440	0.709	0.974	156	740	5523	4611	-0.519	2270	3253	1942	2669	0
4	1	11	"IntYDR064W"	"IntYDR064W"	15620	15810	130	3362	2844	1319	89	91	25	100	99	0	2093	1747	831	68	73	70	94	90	0	1.616	1.641	1.657	1.792	1.662	1.619	0.930	120	644	5298	4434	0.693	3273	2025	2755	1679	0
4	2	11	"YDRWsigma4"	"YDRWsigma4"	15810	15810	130	310	305	111	86	91	26	94	90	0	384	356	138	69	72	54	88	85	0	0.711	0.763	0.755	0.810	1.924	0.718	0.806	120	597	539	506	-0.492	224	315	219	287	0
4	3	11	"tG(CCC)D"	"tG(CCC)D"	16020	15800	130	148	150	50	87	90	25	76	55	0	265	246	95	68	67	34	87	85	0	0.310	0.354	0.345	0.310	2.302	0.338	0.444	120	576	258	241	-1.691	61	197	63	178	0
4	4	11	"YERWdelta12"	"YERWdelta12"	16210	15800	140	379	365	150	88	90	25	92	89	0	1533	1302	623	68	69	56	92	91	0	0.199	0.224	0.227	0.230	1.990	0.215	0.861	156	565	1756	1511	-2.332	291	1465	277	1234	0
4	5	11	"IntYER133W"	"IntYER133W"	16410	15790	140	469	459	179	87	89	25	98	95	0	2409	2087	914	69	69	51	99	97	0	0.163	0.184	0.183	0.190	1.807	0.175	0.865	156	609	2722	2390	-2.615	382	2340	372	2018	0
4	6	11	"YERCdelta26"	"YERCdelta26"	16620	15790	140	364	368	146	87	89	24	99	96	0	1550	1434	648	68	66	34	99	98	0	0.187	0.206	0.204	0.214	1.846	0.196	0.852	156	575	1759	1647	-2.420	277	1482	281	1366	0
4	7	11	"iYAR044W-2"	"iYAR044W-2"	16810	15790	130	278	285	132	86	87	23	90	86	0	449	458	259	68	66	43	87	81	0	0.504	0.510	0.509	0.492	1.834	0.453	0.764	120	532	573	589	-0.989	192	381	199	390	0
4	8	11	"iYAR050W"	"iYAR050W"	17020	15780	140	511	460	191	86	87	25	96	94	0	1150	992	461	66	67	81	94	89	0	0.392	0.404	0.405	0.411	1.817	0.379	0.859	156	615	1509	1300	-1.351	425	1084	374	926	0
4	9	11	"iYARCdelta8-2"	"iYARCdelta8-2"	17220	15780	130	169	178	67	87	88	24	87	70	0	261	256	111	66	69	87	83	55	0	0.421	0.479	0.454	0.482	2.536	0.479	0.583	120	529	277	281	-1.250	82	195	91	190	0
4	10	11	"iYBLWdelta3"	"iYBLWdelta3"	17410	15770	130	270	285	114	89	96	70	87	66	0	410	406	182	68	68	44	93	89	0	0.529	0.580	0.560	0.552	1.659	0.621	0.638	120	587	523	534	-0.918	181	342	196	338	0
4	11	11	"iYBL105C"	"iYBL105C"	17620	15770	130	2789	2456	1140	87	97	71	100	98	0	5637	4961	2178	67	69	50	100	100	0	0.485	0.484	0.502	0.490	1.537	0.479	0.934	120	582	8272	7263	-1.044	2702	5570	2369	4894	0
4	12	11	"iYBL101C"	"iYBL101C"	17810	15760	130	1273	1175	444	87	90	28	99	97	0	6791	5685	2332	67	68	47	100	98	0	0.176	0.194	0.192	0.202	1.439	0.180	0.916	120	597	7910	6706	-2.503	1186	6724	1088	5618	0
4	13	11	"iYBL085W"	"iYBL085W"	18020	15770	130	867	836	427	86	89	26	98	97	0	2432	2292	1368	68	70	53	98	94	0	0.330	0.337	0.345	0.378	1.642	0.318	0.911	120	608	3145	2974	-1.598	781	2364	750	2224	0
4	14	11	"iYBL080C"	"iYBL080C"	18220	15750	120	499	521	256	87	90	25	97	95	0	2297	2281	1264	67	72	63	98	97	0	0.185	0.196	0.195	0.211	1.746	0.183	0.856	120	516	2642	2648	-2.436	412	2230	434	2214	0
4	15	11	"iYBL075C"	"iYBL075C"	18400	15750	130	2298	2094	801	85	87	24	100	100	0	5065	4452	1783	67	66	30	100	100	0	0.443	0.458	0.452	0.470	1.300	0.447	0.940	120	600	7211	6394	-1.175	2213	4998	2009	4385	0
4	16	11	"iYBL056W"	"iYBL056W"	18620	15750	130	498	498	249	83	86	24	95	93	0	1912	1735	828	67	67	39	96	94	0	0.225	0.249	0.245	0.256	1.709	0.245	0.882	120	600	2260	2083	-2.152	415	1845	415	1668	0
4	17	11	"iYBL051C"	"iYBL051C"	18830	15740	140	913	816	364	85	88	28	98	98	0	3730	3115	1446	67	71	66	98	98	0	0.226	0.240	0.243	0.251	1.544	0.236	0.937	156	569	4491	3779	-2.145	828	3663	731	3048	0
4	18	11	"iYBL046W"	"iYBL046W"	19010	15740	140	1149	1144	573	86	87	25	99	98	0	1870	1741	861	68	68	41	97	96	0	0.590	0.632	0.628	0.664	1.599	0.631	0.938	156	550	2865	2731	-0.761	1063	1802	1058	1673	0
4	19	11	"iYBR250W"	"iYBR250W"	19220	15730	140	1018	1019	491	87	90	28	100	97	0	2810	2703	1346	69	70	50	99	98	0	0.340	0.354	0.362	0.364	1.483	0.349	0.934	156	668	3672	3566	-1.558	931	2741	932	2634	0
4	20	11	"iYBR254C"	"iYBR254C"	19430	15740	130	1147	1059	471	88	92	30	99	95	0	2874	2450	1162	70	70	36	99	96	0	0.378	0.408	0.402	0.433	1.527	0.388	0.932	120	601	3863	3351	-1.405	1059	2804	971	2380	0
4	21	11	"iYBR259W"	"iYBR259W"	19630	15730	130	781	742	301	86	90	25	100	99	0	1231	1152	544	69	68	31	100	97	0	0.598	0.606	0.584	0.642	1.443	0.579	0.926	120	635	1857	1739	-0.742	695	1162	656	1083	0
4	1	12	"iYBR279W"	"iYBR279W"	15630	16000	130	1510	1378	554	86	90	33	99	98	0	1982	1705	721	68	71	57	98	95	0	0.744	0.789	0.794	0.829	1.579	0.769	0.946	120	708	3338	2929	-0.427	1424	1914	1292	1637	0
4	2	12	"iYBR283C"	"iYBR283C"	15840	16000	130	522	520	208	85	89	28	99	97	0	2452	2290	983	68	70	39	99	99	0	0.183	0.196	0.195	0.198	1.609	0.185	0.893	120	596	2821	2657	-2.448	437	2384	435	2222	0
4	3	12	"iYBR287W"	"iYBR287W"	16040	16000	140	312	308	107	86	89	24	95	93	0	654	570	241	68	69	38	94	91	0	0.386	0.442	0.450	0.467	2.039	0.416	0.835	156	567	812	724	-1.375	226	586	222	502	0
4	4	12	"iYCL075W"	"iYCL075W"	16240	15990	150	729	672	355	90	93	34	91	86	0	2668	2212	1398	72	72	35	92	89	0	0.246	0.272	0.271	0.313	1.798	0.265	0.848	156	570	3235	2722	-2.022	639	2596	582	2140	0
4	5	12	"iYCL073C"	"iYCL073C"	16430	15990	130	2267	2114	805	89	94	37	100	100	0	5698	5203	2098	72	77	97	100	99	0	0.387	0.395	0.397	0.407	1.310	0.378	0.936	120	502	7804	7156	-1.369	2178	5626	2025	5131	0
4	6	12	"iYCL065W-0"	"iYCL065W-0"	16620	15980	140	1707	1689	730	86	91	29	100	99	0	1731	1654	721	69	81	165	96	94	0	0.975	1.011	0.998	1.042	1.557	0.996	0.922	156	556	3283	3188	-0.036	1621	1662	1603	1585	0
4	7	12	"iYCL047C"	"iYCL047C"	16810	15980	140	1459	1302	627	86	89	27	98	96	0	1332	1125	565	69	75	141	89	82	0	1.087	1.152	1.158	1.202	1.501	1.136	0.953	156	546	2636	2272	0.120	1373	1263	1216	1056	0
4	8	12	"iYCL038C"	"iYCL038C"	17000	15980	140	539	533	256	86	89	30	96	95	0	887	838	432	69	69	34	96	95	0	0.554	0.581	0.565	0.605	1.709	0.567	0.900	156	610	1271	1216	-0.853	453	818	447	769	0
4	9	12	"iYCL033C"	"iYCL033C"	17210	15970	130	1045	977	387	87	90	30	100	98	0	1722	1581	728	69	70	36	99	98	0	0.580	0.589	0.590	0.634	1.773	0.556	0.896	120	539	2611	2402	-0.787	958	1653	890	1512	0
4	10	12	"iYDL054C"	"iYDL054C"	17390	15970	140	730	686	397	89	93	35	90	82	0	3540	3066	2110	70	72	80	86	80	0	0.185	0.199	0.201	0.252	2.114	0.183	0.887	156	657	4111	3593	-2.437	641	3470	597	2996	0
4	11	12	"iYDL049C"	"iYDL049C"	17610	15960	120	633	628	271	90	95	46	98	95	0	3815	3362	1431	68	73	91	98	97	0	0.145	0.163	0.160	0.177	1.739	0.155	0.849	120	545	4290	3832	-2.787	543	3747	538	3294	0
4	12	12	"iYDL046W"	"iYDL046W"	17810	15960	140	2844	2541	1035	87	91	31	99	99	0	4058	3540	1556	68	68	42	99	97	0	0.691	0.707	0.712	0.770	1.536	0.693	0.962	156	646	6747	5926	-0.533	2757	3990	2454	3472	0
4	13	12	"iYDL028C"	"iYDL028C"	18010	15950	130	1730	1626	602	88	91	31	100	100	0	3559	3205	1251	69	69	52	99	97	0	0.470	0.490	0.486	0.510	1.440	0.481	0.958	120	577	5132	4674	-1.088	1642	3490	1538	3136	0
4	14	12	"itA(AGC)D"	"itA(AGC)D"	18200	15950	130	903	876	220	88	90	25	100	100	0	4176	3824	1127	69	69	48	100	100	0	0.198	0.210	0.212	0.213	1.281	0.200	0.937	120	587	4922	4543	-2.333	815	4107	788	3755	0
4	15	12	"iYDL019C"	"iYDL019C"	18410	15950	140	4353	3862	1406	88	100	132	100	99	0	5893	5339	2053	70	80	155	99	98	0	0.732	0.716	0.715	0.739	1.383	0.705	0.957	156	683	10088	9043	-0.449	4265	5823	3774	5269	0
4	16	12	"iYDL005C"	"iYDL005C"	18600	15940	130	7390	6632	2327	89	142	502	96	94	0	7256	6418	2346	69	73	70	99	99	0	1.016	1.031	1.025	1.071	1.406	1.022	0.960	120	580	14488	12892	0.023	7301	7187	6543	6349	0
4	17	12	"iYDL001W"	"iYDL001W"	18800	15930	130	9196	8003	4163	89	143	494	95	90	0	2910	2524	1249	69	72	66	96	94	0	3.206	3.224	3.260	3.360	1.517	3.357	0.915	120	604	11948	10369	1.681	9107	2841	7914	2455	0
4	18	12	"iYDR003W"	"iYDR003W"	19010	15940	140	2347	2092	1336	86	92	78	91	88	0	3026	2596	1722	68	71	47	86	83	0	0.764	0.794	0.774	0.927	2.293	0.778	0.899	156	603	5219	4534	-0.388	2261	2958	2006	2528	0
4	19	12	"iYDR020C"	"iYDR020C"	19210	15940	140	1199	1114	798	88	93	76	80	73	0	3218	2743	2112	68	71	65	80	78	0	0.353	0.384	0.380	0.452	2.518	0.370	0.903	156	636	4261	3701	-1.503	1111	3150	1026	2675	0
4	20	12	"iYDR023W"	"iYDR023W"	19420	15930	130	444	414	222	88	92	30	86	82	0	1301	1073	691	69	75	106	78	75	0	0.289	0.325	0.321	0.350	1.647	0.312	0.874	120	564	1588	1330	-1.791	356	1232	326	1004	0
4	21	12	"iYDR028C"	"iYDR028C"	19600	15930	130	819	1004	576	85	90	24	100	100	0	1246	1622	1061	68	71	91	98	95	0	0.623	0.591	0.628	0.645	1.468	0.552	0.900	120	639	1912	2473	-0.682	734	1178	919	1554	0
4	1	13	"iYDR322W"	"iYDR322W"	15640	16210	130	796	726	278	90	94	46	98	94	0	2352	2057	879	71	70	31	99	97	0	0.310	0.320	0.313	0.346	1.521	0.302	0.881	120	657	2987	2622	-1.692	706	2281	636	1986	0
4	2	13	"iYDR326C"	"iYDR326C"	15820	16200	130	359	354	123	90	91	38	94	92	0	1579	1413	528	72	71	30	100	98	0	0.179	0.197	0.188	0.199	1.589	0.184	0.802	120	547	1776	1605	-2.486	269	1507	264	1341	0
4	3	13	"iYDR331W"	"iYDR331W"	16020	16200	140	159	164	61	88	90	28	76	55	0	381	360	160	71	70	27	92	87	0	0.229	0.263	0.257	0.257	2.312	0.256	0.595	156	547	381	365	-2.126	71	310	76	289	0
4	4	13	"iYDR345C-0"	"iYDR345C-0"	16200	16200	140	3573	2974	1345	87	90	25	100	100	0	4261	3472	1688	72	70	21	100	97	0	0.832	0.849	0.843	0.948	1.588	0.831	0.959	156	529	7675	6287	-0.265	3486	4189	2887	3400	0
4	5	13	"iYDR348C"	"iYDR348C"	16410	16190	140	822	760	345	90	93	34	97	92	0	3919	3295	1671	73	76	89	95	94	0	0.190	0.208	0.209	0.231	1.647	0.200	0.934	156	589	4578	3892	-2.393	732	3846	670	3222	0
4	6	13	"iYDR350C"	"iYDR350C"	16610	16190	140	1674	1453	694	87	98	99	94	91	0	3905	3184	1613	72	92	198	92	87	0	0.414	0.439	0.442	0.477	1.673	0.427	0.941	156	606	5420	4478	-1.272	1587	3833	1366	3112	0
4	7	13	"iYDR367W"	"iYDR367W"	16820	16180	120	306	295	112	88	101	108	73	50	0	1364	1162	574	73	97	207	86	78	0	0.169	0.190	0.195	0.206	1.888	0.210	0.609	120	510	1509	1296	-2.566	218	1291	207	1089	0
4	8	13	"iYDR371W"	"iYDR371W"	17000	16180	130	241	251	78	86	90	30	98	95	0	1020	936	379	71	79	101	93	90	0	0.163	0.191	0.187	0.202	2.080	0.155	0.687	120	598	1104	1030	-2.614	155	949	165	865	0
4	9	13	"iYDR375C"	"iYDR375C"	17220	16170	130	935	839	337	88	92	32	98	95	0	2225	1891	828	69	77	92	94	90	0	0.393	0.412	0.421	0.429	1.327	0.402	0.938	120	665	3003	2573	-1.348	847	2156	751	1822	0
4	10	13	"itG(CCC)D"	"itG(CCC)D"	17430	16180	130	582	522	233	89	92	27	94	90	0	2262	1878	1037	69	72	60	90	87	0	0.225	0.239	0.244	0.282	1.931	0.227	0.918	120	619	2686	2242	-2.153	493	2193	433	1809	0
4	11	13	"iYDR394W"	"iYDR394W"	17640	16160	130	1409	1280	545	89	92	27	98	97	0	2590	2232	1069	70	69	32	96	95	0	0.524	0.551	0.557	0.591	1.428	0.535	0.958	120	622	3840	3353	-0.933	1320	2520	1191	2162	0
4	12	13	"iYDR399W"	"iYDR399W"	17830	16160	130	2315	1997	820	88	92	30	98	97	0	2050	1763	758	67	66	39	94	92	0	1.123	1.126	1.143	1.193	1.440	1.109	0.958	120	549	4210	3605	0.167	2227	1983	1909	1696	0
4	13	13	"iYER056C-A"	"iYER056C-A"	18010	16170	130	1341	1159	492	90	92	30	100	98	0	3842	3129	1437	68	67	39	97	97	0	0.331	0.349	0.346	0.368	1.423	0.338	0.955	120	578	5025	4130	-1.593	1251	3774	1069	3061	0
4	14	13	"iYER060W"	"iYER060W"	18220	16160	140	2653	2165	1173	90	104	142	94	87	0	7366	5725	3328	71	85	180	93	89	0	0.351	0.367	0.368	0.429	1.767	0.355	0.958	156	648	9858	7729	-1.509	2563	7295	2075	5654	0
4	15	13	"iYER063W"	"iYER063W"	18410	16160	130	3893	3053	1760	93	111	155	89	86	0	7876	5882	3572	74	97	202	92	87	0	0.487	0.510	0.512	0.574	1.538	0.491	0.970	120	555	11602	8768	-1.038	3800	7802	2960	5808	0
4	16	13	"itA(UGC)E"	"itA(UGC)E"	18620	16150	130	1024	874	439	93	106	129	85	80	0	1445	1173	625	71	77	66	86	85	0	0.678	0.709	0.689	0.759	1.974	0.702	0.951	120	633	2305	1883	-0.562	931	1374	781	1102	0
4	17	13	"iYER078C"	"iYER078C"	18830	16150	130	3263	2721	1215	91	128	419	94	84	0	4307	3496	1661	71	76	74	98	95	0	0.749	0.768	0.768	0.827	1.522	0.759	0.947	120	603	7408	6055	-0.417	3172	4236	2630	3425	0
4	18	13	"iYER082C"	"iYER082C"	19030	16140	140	2267	2002	928	90	96	78	98	96	0	2353	1987	902	70	78	95	95	92	0	0.954	0.997	1.014	1.048	1.459	1.005	0.957	156	596	4460	3829	-0.069	2177	2283	1912	1917	0
4	19	13	"iYER096W"	"iYER096W"	19220	16140	130	361	351	138	88	96	83	85	75	0	610	572	253	69	84	146	85	81	0	0.505	0.523	0.516	0.526	1.667	0.390	0.649	120	532	814	766	-0.987	273	541	263	503	0
4	20	13	"iYER098W"	"iYER098W"	19420	16130	130	753	707	237	89	91	28	100	100	0	2274	1949	720	70	82	147	100	99	0	0.301	0.329	0.331	0.334	1.291	0.316	0.935	120	597	2868	2497	-1.731	664	2204	618	1879	0
4	21	13	"iYER102W"	"iYER102W"	19620	16130	140	2873	2529	939	88	90	24	100	100	0	6112	5187	2002	68	71	91	100	99	0	0.461	0.477	0.480	0.487	1.289	0.468	0.967	156	772	8829	7560	-1.118	2785	6044	2441	5119	0
4	1	14	"iYER118C"	"iYER118C"	15630	16410	140	1528	1335	551	88	93	38	99	99	0	2583	2175	929	70	73	78	98	97	0	0.573	0.592	0.600	0.609	1.304	0.581	0.950	156	759	3953	3352	-0.803	1440	2513	1247	2105	0
4	2	14	"iYER123W"	"iYER123W"	15830	16400	140	1800	1673	717	89	89	23	100	100	0	4250	3673	1581	71	72	52	98	97	0	0.409	0.440	0.445	0.467	1.516	0.436	0.958	156	580	5890	5186	-1.288	1711	4179	1584	3602	0
4	3	14	"iYER127W"	"iYER127W"	16030	16400	140	1337	1199	502	88	88	24	100	99	0	2531	2153	961	71	75	86	97	95	0	0.508	0.534	0.526	0.564	1.420	0.522	0.949	156	547	3709	3193	-0.978	1249	2460	1111	2082	0
4	4	14	"iYGL200C"	"iYGL200C"	16230	16400	140	386	369	128	88	89	24	95	94	0	2529	2198	951	71	80	136	94	92	0	0.121	0.132	0.131	0.141	1.638	0.126	0.887	156	550	2756	2408	-3.044	298	2458	281	2127	0
4	5	14	"iYGL195W"	"iYGL195W"	16430	16390	140	1953	1759	707	87	89	24	100	100	0	2657	2397	1058	72	76	109	96	94	0	0.722	0.719	0.725	0.763	1.401	0.703	0.960	156	548	4451	3997	-0.470	1866	2585	1672	2325	0
4	6	14	"iYGL190C"	"iYGL190C"	16630	16390	140	1503	1344	596	87	92	44	99	96	0	3459	2978	1511	73	74	49	99	95	0	0.418	0.433	0.436	0.478	1.491	0.413	0.954	156	543	4802	4162	-1.258	1416	3386	1257	2905	0
4	7	14	"iYGL176C"	"iYGL176C"	16820	16390	140	635	603	258	86	90	25	99	96	0	1629	1455	683	71	70	29	100	98	0	0.352	0.374	0.373	0.396	1.509	0.364	0.937	156	605	2107	1901	-1.505	549	1558	517	1384	0
4	8	14	"iYGL172W"	"iYGL172W"	17040	16380	130	525	499	202	86	88	24	95	94	0	2354	2007	843	69	67	22	99	98	0	0.192	0.213	0.208	0.218	1.524	0.204	0.905	120	583	2724	2351	-2.380	439	2285	413	1938	0
4	9	14	"iYGL169W"	"iYGL169W"	17220	16380	130	156	171	64	88	90	28	80	58	0	344	338	155	69	68	29	90	88	0	0.247	0.309	0.304	0.299	2.246	0.312	0.622	120	604	343	352	-2.016	68	275	83	269	0
4	10	14	"iYGL152C"	"iYGL152C"	17450	16360	130	566	523	197	90	92	27	95	93	0	1660	1415	603	68	73	71	94	90	0	0.299	0.321	0.321	0.341	1.488	0.305	0.920	120	593	2068	1780	-1.742	476	1592	433	1347	0
4	11	14	"iYGL147C"	"iYGL147C"	17630	16370	130	1014	1033	420	88	91	26	99	99	0	2891	2702	1081	69	72	72	98	96	0	0.328	0.359	0.356	0.381	1.796	0.354	0.954	120	560	3748	3578	-1.608	926	2822	945	2633	0
4	12	14	"iYGL143C"	"iYGL143C"	17820	16360	130	796	731	303	87	89	23	95	95	0	2945	2516	1144	69	68	39	97	95	0	0.247	0.263	0.263	0.270	1.414	0.256	0.939	120	614	3585	3091	-2.020	709	2876	644	2447	0
4	13	14	"iYGL125W"	"iYGL125W"	18040	16360	140	314	337	173	87	90	27	92	89	0	564	617	420	68	71	67	89	85	0	0.458	0.455	0.461	0.481	1.788	0.394	0.773	156	627	723	799	-1.128	227	496	250	549	0
4	14	14	"iYGL121C"	"iYGL121C"	18230	16350	130	900	808	300	86	93	60	97	94	0	2377	2011	819	70	80	120	96	96	0	0.353	0.372	0.366	0.384	1.407	0.354	0.940	120	534	3121	2663	-1.503	814	2307	722	1941	0
4	15	14	"iYGL118C"	"iYGL118C"	18440	16350	140	263	258	96	89	96	57	86	71	0	897	783	355	72	79	100	89	88	0	0.211	0.238	0.236	0.255	1.943	0.226	0.794	156	710	999	880	-2.245	174	825	169	711	0
4	16	14	"iYGR165W"	"iYGR165W"	18670	16340	150	470	440	198	89	96	43	91	85	0	2766	2392	1260	71	87	231	87	83	0	0.141	0.151	0.153	0.170	1.975	0.142	0.872	156	646	3076	2672	-2.822	381	2695	351	2321	0
4	17	14	"iYGR169C"	"iYGR169C"	18830	16340	130	2873	2422	1224	92	97	44	97	92	0	6917	5533	3085	71	91	256	89	85	0	0.406	0.427	0.426	0.491	1.670	0.408	0.965	120	528	9627	7792	-1.300	2781	6846	2330	5462	0
4	18	14	"iYGR173W"	"iYGR173W"	19050	16340	140	1154	1083	482	88	92	29	98	98	0	3476	3136	1537	70	77	87	96	93	0	0.313	0.325	0.325	0.366	1.743	0.312	0.944	156	606	4472	4061	-1.676	1066	3406	995	3066	0
4	19	14	"iYGRWdelta31"	"iYGRWdelta31"	19240	16340	140	1533	1465	744	88	94	41	98	97	0	2963	2673	1467	72	92	276	89	84	0	0.500	0.529	0.528	0.575	1.551	0.505	0.944	156	592	4336	3978	-1.000	1445	2891	1377	2601	0
4	20	14	"iYGR191W"	"iYGR191W"	19440	16330	130	1478	1322	541	93	98	43	100	98	0	3585	3171	1390	73	90	260	98	94	0	0.394	0.397	0.397	0.403	1.257	0.373	0.945	120	559	4897	4327	-1.342	1385	3512	1229	3098	0
4	21	14	"iYGR195W"	"iYGR195W"	19620	16330	130	887	908	385	88	92	27	99	98	0	2247	2082	885	70	72	52	99	98	0	0.367	0.408	0.400	0.408	1.403	0.400	0.948	120	625	2976	2832	-1.446	799	2177	820	2012	0
4	1	15	"iYGR211W"	"iYGR211W"	15640	16600	130	3068	2626	1155	85	90	27	100	100	0	2944	2455	1157	69	72	56	95	95	0	1.038	1.065	1.075	1.189	1.727	1.021	0.958	120	674	5858	4927	0.053	2983	2875	2541	2386	0
4	2	15	"iYGR215W"	"iYGR215W"	15860	16600	150	804	840	517	88	90	28	94	91	0	1063	986	571	69	72	53	89	85	0	0.720	0.820	0.770	0.825	1.669	0.831	0.899	156	627	1710	1669	-0.473	716	994	752	917	0
4	3	15	"iYGRCtau3"	"iYGRCtau3"	16040	16600	130	494	466	171	87	89	26	100	98	0	669	619	231	70	75	92	94	90	0	0.679	0.690	0.699	0.699	1.503	0.637	0.824	120	521	1006	928	-0.558	407	599	379	549	0
4	4	15	"iYGR234W"	"iYGR234W"	16250	16590	140	1115	1039	552	88	90	24	96	94	0	2901	2475	1341	70	80	132	91	88	0	0.363	0.395	0.393	0.421	1.676	0.390	0.947	156	609	3858	3356	-1.463	1027	2831	951	2405	0
4	5	15	"iYGR238C"	"iYGR238C"	16450	16590	140	1092	1037	457	88	90	25	100	100	0	2638	2274	1041	71	75	108	98	92	0	0.391	0.431	0.435	0.449	1.594	0.422	0.941	156	555	3571	3152	-1.354	1004	2567	949	2203	0
4	6	15	"iYGR243W"	"iYGR243W"	16650	16590	140	373	408	211	88	90	24	97	92	0	743	783	475	71	77	187	83	72	0	0.424	0.449	0.460	0.492	1.810	0.431	0.911	156	530	957	1032	-1.237	285	672	320	712	0
4	7	15	"iYHR177W"	"iYHR177W"	16840	16580	140	2741	2377	1092	87	90	25	99	96	0	5407	4499	2400	70	87	240	91	88	0	0.497	0.517	0.514	0.596	1.569	0.489	0.963	156	584	7991	6719	-1.008	2654	5337	2290	4429	0
4	8	15	"iYHR180W"	"iYHR180W"	17040	16580	140	2984	2639	1112	87	89	24	100	100	0	5993	5052	2318	69	75	153	97	94	0	0.489	0.512	0.526	0.563	1.517	0.494	0.960	156	601	8821	7535	-1.032	2897	5924	2552	4983	0
4	9	15	"iYHR183W"	"iYHR183W"	17250	16570	140	1733	1516	709	88	91	26	99	98	0	3741	3216	1561	70	74	87	94	93	0	0.448	0.454	0.455	0.479	1.705	0.446	0.953	156	588	5316	4574	-1.158	1645	3671	1428	3146	0
4	10	15	"iYHR200W"	"iYHR200W"	17450	16570	140	527	537	269	90	95	28	96	93	0	1045	993	584	69	79	112	89	86	0	0.448	0.484	0.496	0.516	1.665	0.447	0.869	156	548	1413	1371	-1.159	437	976	447	924	0
4	11	15	"iYHR204W"	"iYHR204W"	17640	16570	140	887	818	359	88	91	26	98	95	0	3824	3110	1515	69	75	79	98	93	0	0.213	0.240	0.240	0.254	1.579	0.230	0.932	156	533	4554	3771	-2.233	799	3755	730	3041	0
4	12	15	"iYHR208W"	"iYHR208W"	17840	16560	130	3907	3532	1517	86	89	23	100	100	0	4360	3690	1618	69	71	61	100	97	0	0.890	0.952	0.928	0.992	1.349	0.916	0.953	120	555	8112	7067	-0.167	3821	4291	3446	3621	0
4	13	15	"iYIL166C"	"iYIL166C"	18050	16560	140	3290	2866	1309	86	89	26	100	100	0	4100	3418	1661	69	73	75	96	96	0	0.795	0.830	0.843	0.913	1.672	0.815	0.952	156	542	7235	6129	-0.331	3204	4031	2780	3349	0
4	14	15	"iYIL162W"	"iYIL162W"	18240	16560	140	823	746	337	87	90	28	94	92	0	3264	2625	1314	69	72	65	95	91	0	0.230	0.258	0.251	0.275	1.633	0.246	0.922	156	560	3931	3215	-2.118	736	3195	659	2556	0
4	15	15	"iYIL157C"	"iYIL157C"	18450	16560	130	1307	1138	557	87	91	35	95	93	0	5799	4714	2488	70	79	103	92	91	0	0.213	0.226	0.226	0.253	1.761	0.211	0.917	120	530	6949	5695	-2.231	1220	5729	1051	4644	0
4	16	15	"iYIL140W"	"iYIL140W"	18650	16540	130	1975	1796	877	90	94	39	98	98	0	2661	2421	1246	70	91	254	90	87	0	0.728	0.726	0.720	0.762	1.644	0.724	0.924	120	557	4476	4057	-0.459	1885	2591	1706	2351	0
4	17	15	"iYIL136W"	"iYIL136W"	18850	16540	130	3418	3173	1330	90	96	48	100	99	0	8161	7021	3080	70	90	249	96	95	0	0.411	0.444	0.439	0.469	1.401	0.422	0.941	120	554	11419	10034	-1.282	3328	8091	3083	6951	0
4	18	15	"iYIL133C"	"iYIL133C"	19040	16540	130	1869	1791	803	87	90	27	100	99	0	4280	3874	1810	70	73	45	99	99	0	0.423	0.448	0.438	0.474	1.515	0.428	0.920	120	491	5992	5508	-1.240	1782	4210	1704	3804	0
4	19	15	"iYJL112W"	"iYJL112W"	19230	16540	140	2687	2509	1199	89	91	25	100	99	0	5849	5125	2674	70	70	32	98	98	0	0.450	0.479	0.481	0.509	1.475	0.454	0.936	156	498	8377	7475	-1.153	2598	5779	2420	5055	0
4	20	15	"iYJL107C"	"iYJL107C"	19430	16540	140	728	706	328	92	96	30	99	96	0	5936	5303	2803	71	83	234	98	95	0	0.108	0.117	0.114	0.123	1.490	0.109	0.883	156	562	6501	5846	-3.205	636	5865	614	5232	0
4	21	15	"iYJL104W"	"iYJL104W"	19640	16520	130	3122	2775	1179	89	92	28	100	99	0	4724	4104	1941	71	81	221	91	88	0	0.652	0.666	0.652	0.736	1.694	0.620	0.933	120	662	7686	6719	-0.617	3033	4653	2686	4033	0
4	1	16	"iYJL089W"	"iYJL089W"	15660	16800	130	559	586	304	88	92	30	98	94	0	1277	1202	633	70	70	36	95	91	0	0.390	0.440	0.437	0.463	1.680	0.422	0.897	120	640	1678	1630	-1.358	471	1207	498	1132	0
4	2	16	"iYJL083W"	"iYJL083W"	15850	16800	130	784	713	271	87	89	24	100	98	0	2362	2025	882	70	71	36	99	98	0	0.304	0.320	0.317	0.335	1.437	0.297	0.921	120	489	2989	2581	-1.717	697	2292	626	1955	0
4	3	16	"iYJL079C"	"iYJL079C"	16040	16800	140	770	723	326	88	91	25	96	95	0	4063	3483	1634	71	72	43	100	97	0	0.171	0.186	0.187	0.187	1.708	0.181	0.908	156	573	4674	4047	-2.549	682	3992	635	3412	0
4	4	16	"iYJL060W"	"iYJL060W"	16260	16790	130	302	292	100	89	91	24	96	91	0	1354	1207	438	71	71	39	98	95	0	0.166	0.179	0.176	0.184	1.871	0.171	0.817	120	553	1496	1339	-2.591	213	1283	203	1136	0
4	5	16	"iYJL055W"	"iYJL055W"	16450	16790	130	595	593	243	90	92	25	97	94	0	1844	1630	708	70	72	53	94	93	0	0.285	0.322	0.321	0.342	1.825	0.307	0.908	120	471	2279	2063	-1.813	505	1774	503	1560	0
4	6	16	"iYJL051W"	"iYJL051W"	16630	16790	140	1142	1049	476	88	91	27	100	100	0	1467	1306	624	71	80	197	94	85	0	0.755	0.778	0.777	0.815	1.540	0.729	0.861	156	506	2450	2196	-0.405	1054	1396	961	1235	0
4	7	16	"itR(UCU)J2"	"itR(UCU)J2"	16830	16790	130	499	495	243	88	91	27	94	89	0	1625	1454	846	71	88	248	84	77	0	0.264	0.294	0.291	0.326	1.884	0.252	0.803	120	546	1965	1790	-1.919	411	1554	407	1383	0
4	8	16	"iYJLCdelta7"	"iYJLCdelta7"	17050	16780	140	1015	889	609	88	93	40	87	83	0	2208	1976	1468	70	82	167	79	72	0	0.434	0.420	0.421	0.473	2.118	0.401	0.897	156	587	3065	2707	-1.206	927	2138	801	1906	0
4	9	16	"iYJL034W"	"iYJL034W"	17230	16770	120	1505	1395	621	89	102	91	99	95	0	2727	2419	1155	71	92	266	92	85	0	0.533	0.556	0.555	0.595	1.521	0.526	0.896	120	422	4072	3654	-0.907	1416	2656	1306	2348	-100
4	10	16	"iYKL134C"	"iYKL134C"	17370	16770	130	1725	1518	697	90	99	83	94	91	0	1847	1620	768	71	94	277	86	81	0	0.921	0.922	0.928	0.975	1.777	0.890	0.890	120	437	3411	2977	-0.119	1635	1776	1428	1549	-100
4	11	16	"iYKL129C"	"iYKL129C"	17560	16760	150	395	375	194	89	102	128	75	57	0	551	551	331	71	91	182	76	64	0	0.637	0.596	0.625	0.637	1.910	0.563	0.843	156	550	786	766	-0.650	306	480	286	480	0
4	12	16	"iYKL126W"	"iYKL126W"	17760	16760	150	545	486	229	90	107	128	78	71	0	3360	3027	1680	70	92	177	87	85	0	0.138	0.134	0.139	0.147	1.953	0.129	0.891	156	614	3745	3353	-2.854	455	3290	396	2957	0
4	13	16	"iYKL108W"	"iYKL108W"	17960	16760	150	3186	2654	1435	88	94	46	95	94	0	5174	4166	2287	70	73	62	95	95	0	0.607	0.626	0.623	0.630	1.710	0.620	0.941	156	617	8202	6662	-0.720	3098	5104	2566	4096	0
4	14	16	"iYKL104C"	"iYKL104C"	18160	16750	150	1352	1184	534	89	91	26	96	95	0	3789	3131	1443	70	73	69	94	92	0	0.340	0.358	0.362	0.414	2.247	0.349	0.925	156	545	4982	4156	-1.558	1263	3719	1095	3061	0
4	15	16	"iYKL100C"	"iYKL100C"	18360	16750	150	481	485	283	89	92	30	87	82	0	2350	1899	1193	70	75	74	89	85	0	0.172	0.217	0.212	0.230	2.193	0.212	0.884	156	576	2672	2225	-2.540	392	2280	396	1829	0
4	16	16	"iYKL086W"	"iYKL086W"	18560	16740	150	258	274	153	91	95	35	80	69	0	680	673	470	71	80	98	77	71	0	0.274	0.304	0.333	0.362	2.351	0.288	0.809	156	620	776	785	-1.867	167	609	183	602	0
4	17	16	"iYKL081W"	"iYKL081W"	18760	16740	150	765	673	318	90	95	43	92	86	0	2551	2054	1123	71	73	42	91	91	0	0.272	0.294	0.289	0.319	2.136	0.280	0.907	156	628	3155	2566	-1.877	675	2480	583	1983	0
4	18	16	"iYKL077W"	"iYKL077W"	18960	16740	150	819	785	519	88	95	44	85	82	0	1598	1489	1041	71	73	45	85	82	0	0.479	0.492	0.484	0.543	2.255	0.492	0.884	156	612	2258	2115	-1.063	731	1527	697	1418	0
4	19	16	"iYKLWdelta7"	"iYKLWdelta7"	19160	16730	150	310	294	152	87	90	25	87	78	0	1161	1023	673	68	68	36	85	82	0	0.204	0.217	0.209	0.231	2.122	0.197	0.775	156	574	1316	1162	-2.293	223	1093	207	955	0
4	20	16	"iYKL063C-0"	"iYKL063C-0"	19360	16730	150	526	493	336	86	91	39	85	78	0	3050	2552	1802	66	79	240	83	78	0	0.147	0.164	0.158	0.177	1.999	0.159	0.827	156	554	3424	2893	-2.762	440	2984	407	2486	0
4	21	16	"iYKL060C"	"iYKL060C"	19560	16720	150	1524	1272	686	89	92	36	93	91	0	4367	3485	1978	68	76	204	87	85	0	0.334	0.346	0.354	0.388	1.800	0.337	0.935	156	763	5734	4600	-1.583	1435	4299	1183	3417	0
4	1	17	"iYLR056W"	"iYLR056W"	15560	17000	150	927	842	333	90	93	26	100	100	0	2576	2252	941	69	71	62	99	98	0	0.334	0.344	0.350	0.358	1.621	0.337	0.925	156	764	3344	2935	-1.583	837	2507	752	2183	0
4	2	17	"iYLR060W"	"iYLR060W"	15760	17000	150	313	328	147	90	93	25	95	92	0	1359	1199	544	71	71	29	96	94	0	0.173	0.211	0.208	0.218	2.008	0.203	0.782	156	611	1511	1366	-2.530	223	1288	238	1128	0
4	3	17	"iYLR065C"	"iYLR065C"	15960	16990	150	1031	970	454	91	93	24	98	97	0	1779	1712	820	74	75	41	98	97	0	0.551	0.537	0.532	0.534	1.635	0.531	0.944	156	605	2645	2517	-0.859	940	1705	879	1638	0
4	4	17	"iYLR082C"	"iYLR082C"	16160	16990	150	1012	915	409	89	91	23	97	96	0	3038	2478	1288	72	73	42	95	93	0	0.311	0.343	0.350	0.412	2.019	0.323	0.932	156	618	3889	3232	-1.684	923	2966	826	2406	0
4	5	17	"iYLR086W"	"iYLR086W"	16360	16990	150	2802	2489	1016	90	93	25	100	99	0	2984	2567	1105	70	72	37	98	97	0	0.931	0.961	0.950	1.039	1.629	0.948	0.939	156	563	5626	4896	-0.104	2712	2914	2399	2497	0
4	6	17	"iYLR090W"	"iYLR090W"	16560	16980	150	1204	1146	543	90	92	25	100	100	0	3427	2933	1457	71	75	59	98	96	0	0.332	0.369	0.375	0.394	1.737	0.351	0.909	156	548	4470	3918	-1.591	1114	3356	1056	2862	0
4	7	17	"iYLRCdelta5"	"iYLRCdelta5"	16760	16980	150	571	639	343	89	94	49	99	96	0	1182	1287	765	73	83	183	93	87	0	0.435	0.453	0.455	0.478	1.634	0.429	0.875	156	628	1591	1764	-1.202	482	1109	550	1214	0
4	8	17	"iYLR110C"	"iYLR110C"	16980	16970	140	2943	2676	1020	88	92	32	100	100	0	2655	2404	984	71	74	60	98	96	0	1.105	1.109	1.112	1.129	1.581	1.096	0.938	156	621	5439	4921	0.144	2855	2584	2588	2333	0
4	9	17	"itR(ACG)L"	"itR(ACG)L"	17180	16980	130	754	704	239	87	90	31	98	97	0	3259	2878	1005	71	82	223	95	95	0	0.209	0.220	0.215	0.221	1.525	0.207	0.859	120	540	3855	3424	-2.257	667	3188	617	2807	0
4	10	17	"iYLR129W"	"iYLR129W"	17380	16970	140	944	791	446	89	98	86	86	79	0	2311	1883	1259	70	88	231	80	73	0	0.382	0.387	0.380	0.440	2.051	0.348	0.857	156	620	3096	2515	-1.390	855	2241	702	1813	0
4	11	17	"iYLR133W"	"iYLR133W"	17590	16970	140	1474	1372	679	93	117	173	92	86	0	3344	2854	1472	73	102	205	92	89	0	0.422	0.460	0.453	0.491	1.634	0.445	0.896	156	626	4652	4060	-1.244	1381	3271	1279	2781	0
4	12	17	"iYLR137W"	"iYLR137W"	17780	16980	130	2081	1841	730	95	121	184	99	92	0	3764	3280	1416	71	102	229	98	94	0	0.538	0.544	0.530	0.562	1.459	0.529	0.921	120	543	5679	4955	-0.895	1986	3693	1746	3209	0
4	13	17	"iYLR448W"	"iYLR448W"	17980	16970	140	1011	930	465	92	100	61	94	90	0	3068	2549	1196	70	82	140	94	91	0	0.307	0.338	0.331	0.340	1.650	0.327	0.843	156	619	3917	3317	-1.706	919	2998	838	2479	0
4	14	17	"iYLR452C"	"iYLR452C"	18180	16960	140	1890	1711	730	87	91	27	99	99	0	3794	3217	1436	70	73	70	97	96	0	0.484	0.516	0.515	0.533	1.781	0.499	0.905	156	588	5527	4771	-1.046	1803	3724	1624	3147	0
4	15	17	"iYLRCdelta27"	"iYLRCdelta27"	18380	16960	140	1928	1823	963	89	94	48	100	98	0	4937	4136	2285	70	77	85	98	96	0	0.378	0.426	0.420	0.461	1.666	0.409	0.926	156	602	6706	5800	-1.404	1839	4867	1734	4066	0
4	16	17	"iYML129C"	"iYML129C"	18580	16950	130	1065	968	439	89	95	49	94	92	0	3443	2792	1434	72	76	62	94	89	0	0.290	0.323	0.323	0.370	1.914	0.308	0.893	120	549	4347	3599	-1.788	976	3371	879	2720	0
4	17	17	"iYML125C"	"iYML125C"	18780	16950	140	972	906	586	87	93	38	93	89	0	2328	1968	1320	72	79	140	87	82	0	0.392	0.432	0.415	0.468	1.748	0.406	0.862	156	623	3141	2715	-1.350	885	2256	819	1896	0
4	18	17	"iYML121W"	"iYML121W"	18980	16940	130	2409	2151	821	88	92	27	100	100	0	3988	3358	1351	71	69	35	100	100	0	0.593	0.628	0.620	0.635	1.289	0.613	0.919	120	542	6238	5350	-0.755	2321	3917	2063	3287	0
4	19	17	"iYML105C"	"iYML105C"	19180	16940	140	1110	969	382	86	91	35	100	100	0	2239	1909	849	68	70	53	100	99	0	0.472	0.480	0.489	0.504	1.518	0.452	0.896	156	643	3195	2724	-1.084	1024	2171	883	1841	0
4	20	17	"iYML100W"	"iYML100W"	19390	16940	140	1397	1247	544	86	96	72	98	96	0	2486	2069	933	67	75	96	97	96	0	0.542	0.580	0.584	0.606	1.642	0.566	0.915	156	649	3730	3163	-0.884	1311	2419	1161	2002	0
4	21	17	"iYML095C"	"iYML095C"	19590	16930	130	778	688	294	87	93	63	90	85	0	1720	1391	676	67	72	97	89	85	0	0.418	0.454	0.450	0.459	1.874	0.419	0.867	120	663	2344	1925	-1.258	691	1653	601	1324	0
4	1	18	"iYML077W"	"iYML077W"	15600	17210	130	1056	994	353	89	91	26	100	99	0	2241	1957	698	70	75	177	97	94	0	0.445	0.480	0.475	0.482	1.319	0.468	0.940	120	576	3138	2792	-1.167	967	2171	905	1887	0
4	2	18	"iYML074C-1"	"iYML074C-1"	15790	17210	140	1168	1094	465	91	94	28	100	100	0	4510	3854	1627	72	77	86	100	99	0	0.243	0.265	0.266	0.267	1.345	0.262	0.932	156	614	5515	4785	-2.043	1077	4438	1003	3782	0
4	3	18	"itR(UCU)M2"	"itR(UCU)M2"	16000	17210	130	1205	1249	621	91	94	27	100	100	0	2077	1947	944	74	79	91	100	98	0	0.556	0.618	0.622	0.622	1.282	0.616	0.942	120	624	3117	3031	-0.846	1114	2003	1158	1873	0
4	4	18	"iYMR210W"	"iYMR210W"	16220	17200	140	294	290	100	88	92	25	94	90	0	1625	1369	590	72	70	22	94	94	0	0.133	0.156	0.152	0.167	1.880	0.144	0.830	156	583	1759	1499	-2.914	206	1553	202	1297	0
4	5	18	"iYMR214W"	"iYMR214W"	16390	17190	140	1099	1000	393	91	94	25	100	100	0	2531	2106	947	71	72	38	99	98	0	0.410	0.447	0.451	0.478	1.417	0.429	0.950	156	514	3468	2944	-1.287	1008	2460	909	2035	0
4	6	18	"iYMR218C"	"iYMR218C"	16590	17190	140	420	429	183	90	92	25	97	91	0	1705	1416	695	72	73	38	96	94	0	0.202	0.252	0.258	0.277	1.716	0.244	0.900	156	568	1963	1683	-2.307	330	1633	339	1344	0
4	7	18	"iYMR234W"	"iYMR234W"	16790	17190	130	1413	1268	956	89	96	54	89	81	0	893	1023	825	73	78	77	76	68	0	1.615	1.241	1.189	1.214	1.800	1.154	0.937	120	576	2144	2129	0.691	1324	820	1179	950	0
4	8	18	"iYMR238W"	"iYMR238W"	17000	17180	140	333	311	150	90	96	53	80	71	0	932	734	455	72	75	73	80	76	0	0.283	0.334	0.331	0.354	2.076	0.321	0.845	156	620	1103	883	-1.823	243	860	221	662	0
4	9	18	"iYMR241W"	"iYMR241W"	17200	17180	140	516	468	217	87	89	24	94	91	0	1657	1346	700	71	71	38	93	92	0	0.270	0.299	0.295	0.323	2.076	0.286	0.900	156	623	2015	1656	-1.886	429	1586	381	1275	0
4	10	18	"iYMR255W"	"iYMR255W"	17410	17170	130	2303	2089	856	90	97	46	100	100	0	2623	2243	984	72	80	68	99	96	0	0.868	0.921	0.930	0.980	1.399	0.903	0.945	120	588	4764	4170	-0.205	2213	2551	1999	2171	0
4	11	18	"iYMR259C"	"iYMR259C"	17620	17180	140	536	514	204	94	107	126	91	73	0	1660	1523	688	72	85	112	99	95	0	0.278	0.289	0.294	0.295	1.560	0.291	0.748	156	583	2030	1871	-1.845	442	1588	420	1451	0
4	12	18	"iYMR263W"	"iYMR263W"	17800	17170	130	1695	1513	740	103	157	231	92	82	0	3122	2700	1450	74	109	192	95	91	0	0.522	0.537	0.532	0.572	1.544	0.508	0.891	120	521	4640	4036	-0.937	1592	3048	1410	2626	0
4	13	18	"iYMR277W"	"iYMR277W"	18010	17170	140	722	797	684	96	151	272	66	52	0	2263	2345	1898	71	102	167	78	73	0	0.286	0.308	0.290	0.319	2.241	0.311	0.585	156	634	2818	2975	-1.808	626	2192	701	2274	0
4	14	18	"iYMR282C"	"iYMR282C"	18220	17150	130	326	303	153	85	89	26	80	76	0	2456	1926	1235	69	70	49	83	80	0	0.101	0.117	0.123	0.129	2.184	0.111	0.839	120	556	2628	2075	-3.308	241	2387	218	1857	0
4	15	18	"iYMR284W"	"iYMR284W"	18430	17160	140	409	391	168	86	92	49	93	84	0	1016	835	417	69	72	64	91	88	0	0.341	0.398	0.398	0.422	1.929	0.382	0.879	156	554	1270	1071	-1.552	323	947	305	766	0
4	16	18	"iYNL061W"	"iYNL061W"	18620	17150	140	1657	1408	631	87	97	66	97	95	0	2782	2208	1071	71	94	217	89	86	0	0.579	0.618	0.622	0.662	1.626	0.602	0.942	156	605	4281	3458	-0.788	1570	2711	1321	2137	0
4	17	18	"iYNL055C"	"iYNL055C"	18840	17140	130	2069	1767	780	87	95	55	100	96	0	4472	3668	1613	71	93	224	94	92	0	0.450	0.467	0.479	0.502	1.666	0.459	0.940	120	541	6383	5277	-1.151	1982	4401	1680	3597	0
4	18	18	"iYNL052W"	"iYNL052W"	19010	17140	130	633	608	209	87	91	28	100	99	0	2747	2325	937	70	71	39	100	99	0	0.204	0.231	0.234	0.244	1.490	0.216	0.907	120	543	3223	2776	-2.294	546	2677	521	2255	0
4	19	18	"iYNL036W"	"iYNL036W"	19210	17140	120	2947	2566	1255	87	92	40	100	96	0	1838	1505	799	69	77	87	88	87	0	1.617	1.726	1.727	1.983	1.882	1.776	0.907	120	497	4629	3915	0.693	2860	1769	2479	1436	0
4	20	18	"iYNL035C"	"iYNL035C"	19410	17150	140	641	593	381	86	96	70	77	69	0	1089	957	694	68	77	105	72	68	0	0.544	0.570	0.569	0.709	2.210	0.568	0.900	156	593	1576	1396	-0.879	555	1021	507	889	0
4	21	18	"iYNL032W"	"iYNL032W"	19620	17130	140	370	393	198	86	91	58	86	78	0	291	298	163	68	71	90	77	57	0	1.274	1.335	1.398	1.339	1.827	1.112	0.675	156	775	507	537	0.349	284	223	307	230	0
4	1	19	"iYNL016W"	"iYNL016W"	15630	17410	140	862	777	311	88	91	26	99	98	0	2608	2173	964	70	75	161	94	90	0	0.305	0.328	0.324	0.352	1.592	0.316	0.929	156	701	3312	2792	-1.713	774	2538	689	2103	0
4	2	19	"iYNL011C"	"iYNL011C"	15820	17400	130	1208	1107	366	88	91	26	100	100	0	2533	2250	831	72	79	106	97	96	0	0.455	0.468	0.465	0.511	1.592	0.449	0.948	120	526	3581	3197	-1.136	1120	2461	1019	2178	0
4	3	19	"iYNL007C"	"iYNL007C"	16010	17400	130	1394	1408	1432	90	93	26	100	100	0	2541	3128	7186	71	73	61	99	95	0	0.528	0.431	0.535	0.565	1.614	0.227	0.841	120	562	3774	4375	-0.922	1304	2470	1318	3057	0
4	4	19	"iYNR007C"	"iYNR007C"	16220	17400	140	539	527	244	89	91	26	94	93	0	3123	2724	1486	71	71	31	94	91	0	0.147	0.165	0.169	0.188	1.887	0.156	0.897	156	633	3502	3091	-2.762	450	3052	438	2653	0
4	5	19	"iYNR011C"	"iYNR011C"	16440	17390	140	767	687	317	89	91	25	96	94	0	2220	1966	1024	72	70	22	96	95	0	0.316	0.316	0.315	0.336	1.783	0.309	0.936	156	527	2826	2492	-1.664	678	2148	598	1894	0
4	6	19	"iYNR015W"	"iYNR015W"	16620	17390	140	811	787	409	90	93	26	100	98	0	2094	1801	887	72	71	28	99	98	0	0.357	0.403	0.390	0.446	1.724	0.388	0.818	156	552	2743	2426	-1.488	721	2022	697	1729	0
4	7	19	"iYOR055W"	"iYOR055W"	16830	17380	130	475	454	142	92	95	34	99	96	0	1923	1704	606	73	74	42	99	99	0	0.207	0.222	0.218	0.221	1.540	0.210	0.891	120	538	2233	1993	-2.272	383	1850	362	1631	0
4	8	19	"iYOR058C-1"	"iYOR058C-1"	17020	17380	140	1463	1302	567	91	92	28	100	100	0	2302	2011	958	71	69	20	99	99	0	0.615	0.624	0.633	0.673	1.532	0.609	0.954	156	603	3603	3151	-0.701	1372	2231	1211	1940	0
4	9	19	"iYOR060C"	"iYOR060C"	17240	17380	140	1496	1351	734	87	91	28	100	100	0	3494	3000	1716	72	72	37	98	96	0	0.412	0.432	0.438	0.493	1.791	0.426	0.962	156	580	4831	4192	-1.280	1409	3422	1264	2928	0
4	10	19	"iYOR073W"	"iYOR073W"	17420	17370	130	567	552	186	87	93	41	98	96	0	1868	1667	589	72	79	89	97	95	0	0.267	0.292	0.293	0.300	1.449	0.283	0.905	120	527	2276	2060	-1.904	480	1796	465	1595	0
4	11	19	"iYOR077W"	"iYOR077W"	17610	17360	130	434	415	155	89	92	26	100	95	0	1664	1438	627	70	75	82	99	95	0	0.216	0.238	0.241	0.252	1.485	0.226	0.886	120	538	1939	1694	-2.208	345	1594	326	1368	0
4	12	19	"iYOR081C"	"iYOR081C"	17820	17370	140	463	444	192	96	145	269	70	14	0	1283	1059	543	72	89	95	87	83	0	0.303	0.353	0.341	0.362	1.504	0.319	0.492	156	602	1578	1335	-1.722	367	1211	348	987	0
4	13	19	"iYOR098C"	"iYOR098C"	18010	17360	130	2022	1741	709	95	157	310	92	84	0	3354	2749	1261	72	100	208	97	93	0	0.587	0.615	0.623	0.659	1.281	0.593	0.905	120	539	5209	4323	-0.768	1927	3282	1646	2677	0
4	14	19	"iYOR103C"	"iYOR103C"	18220	17350	130	3137	2704	1045	87	100	127	100	98	0	5096	4290	1733	71	84	183	99	97	0	0.607	0.620	0.622	0.636	1.221	0.618	0.966	120	609	8075	6836	-0.720	3050	5025	2617	4219	0
4	15	19	"iYOR108W"	"iYOR108W"	18420	17350	140	2308	2013	998	85	88	25	100	98	0	3947	3148	1747	70	70	33	98	94	0	0.573	0.626	0.628	0.733	1.682	0.593	0.945	156	588	6100	5006	-0.802	2223	3877	1928	3078	0
4	16	19	"iYOR125C"	"iYOR125C"	18620	17350	140	671	625	292	88	90	25	94	93	0	925	808	392	71	72	38	91	88	0	0.683	0.729	0.729	0.728	1.555	0.726	0.931	156	590	1437	1274	-0.551	583	854	537	737	0
4	17	19	"iYOR129C"	"iYOR129C"	18830	17340	130	753	675	276	87	93	52	94	90	0	3553	3012	1397	72	85	162	90	89	0	0.191	0.200	0.201	0.225	1.693	0.192	0.935	120	595	4147	3528	-2.386	666	3481	588	2940	0
4	18	19	"iYOR133W"	"iYOR133W"	19030	17330	130	1632	1493	602	86	90	28	100	100	0	3921	3312	1437	71	71	31	100	100	0	0.402	0.434	0.439	0.457	1.392	0.436	0.951	120	577	5396	4648	-1.316	1546	3850	1407	3241	0
4	19	19	"iYPL241C"	"iYPL241C"	19230	17330	140	499	484	197	90	91	26	96	94	0	2189	1879	900	71	73	64	94	92	0	0.193	0.218	0.213	0.246	2.308	0.203	0.852	156	591	2527	2202	-2.373	409	2118	394	1808	0
4	20	19	"iYPL236C"	"iYPL236C"	19420	17330	130	969	879	332	91	92	25	100	98	0	5860	4889	2150	71	70	26	99	98	0	0.152	0.164	0.160	0.184	1.747	0.151	0.931	120	503	6667	5606	-2.721	878	5789	788	4818	0
4	21	19	"iYPL232W"	"iYPL232W"	19630	17330	140	825	801	344	88	90	26	100	98	0	6272	5455	2537	72	74	72	98	97	0	0.119	0.132	0.134	0.140	1.601	0.128	0.918	156	743	6937	6096	-3.073	737	6200	713	5383	0
4	1	20	"iYPL216W"	"iYPL216W"	15620	17610	140	909	831	393	91	95	28	96	94	0	3186	2726	1423	72	75	48	97	96	0	0.263	0.279	0.272	0.303	1.660	0.267	0.923	156	861	3932	3394	-1.929	818	3114	740	2654	0
4	2	20	"iYPL212C"	"iYPL212C"	15830	17600	130	347	340	138	93	97	30	93	88	0	1556	1323	694	77	81	57	92	90	0	0.172	0.198	0.202	0.225	1.868	0.187	0.829	120	676	1733	1493	-2.542	254	1479	247	1246	0
4	3	20	"iYPL208W"	"iYPL208W"	16030	17600	140	672	627	274	91	95	29	94	91	0	3578	2983	1536	75	81	83	92	90	0	0.166	0.184	0.188	0.207	1.819	0.176	0.919	156	766	4084	3444	-2.592	581	3503	536	2908	0
4	4	20	"iYPL191C"	"iYPL191C"	16220	17600	130	589	681	448	90	93	29	92	90	0	1141	1313	967	72	80	113	89	85	0	0.467	0.476	0.476	0.502	1.560	0.458	0.948	120	622	1568	1832	-1.099	499	1069	591	1241	0
4	5	20	"iYPL187W"	"iYPL187W"	16420	17590	140	3268	2744	1513	89	91	27	100	99	0	3999	3376	1940	72	78	90	92	88	0	0.810	0.804	0.818	0.916	1.704	0.792	0.957	156	728	7106	5959	-0.305	3179	3927	2655	3304	0
4	6	20	"iYPL183C"	"iYPL183C"	16620	17590	140	1153	1052	494	90	92	25	96	96	0	5948	5115	2644	73	73	25	100	100	0	0.181	0.191	0.192	0.215	1.674	0.183	0.939	156	706	6938	6004	-2.466	1063	5875	962	5042	0
4	7	20	"iYPL170W"	"iYPL170W"	16820	17580	140	1498	1313	736	91	93	25	95	91	0	3901	3259	1983	73	71	23	92	91	0	0.368	0.384	0.385	0.428	1.951	0.370	0.942	156	778	5235	4408	-1.444	1407	3828	1222	3186	0
4	8	20	"iYPL165C"	"iYPL165C"	17050	17580	140	1244	1142	634	90	94	36	92	91	0	1856	1608	975	73	72	27	92	89	0	0.647	0.685	0.688	0.745	1.633	0.668	0.949	156	734	2937	2587	-0.628	1154	1783	1052	1535	0
4	9	20	"iYPL161C"	"iYPL161C"	17230	17580	140	661	634	339	89	94	36	92	90	0	2049	1912	1236	72	76	94	89	87	0	0.289	0.296	0.302	0.354	1.999	0.278	0.930	156	707	2549	2385	-1.789	572	1977	545	1840	0
4	10	20	"iYPR149W"	"iYPR149W"	17440	17570	140	1032	873	404	91	94	26	94	92	0	2746	2190	1108	72	75	71	91	90	0	0.352	0.369	0.368	0.384	1.470	0.357	0.940	156	724	3615	2900	-1.507	941	2674	782	2118	0
4	11	20	"iYPR154W"	"iYPR154W"	17630	17570	140	2369	2040	1034	90	92	26	99	98	0	3077	2498	1374	72	76	74	92	90	0	0.758	0.804	0.817	0.923	1.767	0.795	0.939	156	718	5284	4376	-0.399	2279	3005	1950	2426	0
4	12	20	"iYPR158W"	"iYPR158W"	17820	17570	140	1202	1086	510	90	92	26	98	97	0	3161	2644	1318	71	70	22	100	100	0	0.360	0.387	0.387	0.406	1.463	0.380	0.945	156	729	4202	3569	-1.474	1112	3090	996	2573	0
4	13	20	"iYPRCtau3"	"iYPRCtau3"	18030	17560	140	3342	2951	1326	90	100	113	96	94	0	7316	6447	3049	73	82	163	96	96	0	0.449	0.449	0.446	0.468	1.536	0.437	0.966	156	761	10495	9235	-1.155	3252	7243	2861	6374	0
4	14	20	"iYPR173C"	"iYPR173C"	18230	17560	140	1757	1490	757	89	99	112	97	90	0	2865	2297	1249	72	82	161	92	88	0	0.597	0.630	0.639	0.684	1.593	0.618	0.958	156	784	4461	3626	-0.744	1668	2793	1401	2225	0
4	15	20	"iYPR179C"	"iYPR179C"	18430	17550	130	352	333	139	85	90	26	94	89	0	2513	2031	1013	70	70	27	100	99	0	0.109	0.126	0.126	0.133	1.639	0.118	0.845	120	622	2710	2209	-3.194	267	2443	248	1961	0
4	16	20	"iYPR195C-0"	"iYPR195C-0"	18620	17550	140	165	171	62	89	95	97	33	5	0	289	271	114	72	75	136	73	25	0	0.350	0.412	0.408	0.368	2.159	0.400	0.592	156	745	293	281	-1.514	76	217	82	199	0
4	17	20	"iYPRWtau4"	"iYPRWtau4"	18830	17540	140	137	139	43	89	96	95	16	0	0	195	188	74	71	75	133	44	1	0	0.387	0.427	0.444	0.432	2.470	0.409	0.374	156	780	172	167	-1.369	48	124	50	117	0
4	18	20	"iYPR200C"	"iYPR200C"	19040	17540	140	237	242	87	89	92	28	94	85	0	411	385	161	72	70	27	92	89	0	0.437	0.489	0.467	0.493	1.798	0.464	0.748	156	779	487	466	-1.196	148	339	153	313	0
4	19	20	"YDRCTy1-2A"	"YDRCTy1-2A"	19240	17540	140	40694	32463	16429	95	97	34	100	100	0	34594	27098	14251	75	73	24	100	100	0	1.176	1.198	1.192	1.261	1.448	1.190	0.967	156	742	75118	59391	0.234	40599	34519	32368	27023	0
4	20	20	"YDRWdelta12"	"YDRWdelta12"	19440	17530	140	22625	18012	9165	94	99	33	100	100	0	29488	23737	12366	76	74	24	100	99	0	0.766	0.757	0.759	0.812	1.622	0.747	0.966	156	716	51943	41579	-0.384	22531	29412	17918	23661	0
4	21	20	"YERWdelta9"	"YERWdelta9"	19630	17530	140	1632	1586	657	89	92	26	100	100	0	3486	2994	1337	72	74	68	100	99	0	0.452	0.512	0.527	0.536	1.356	0.497	0.959	156	850	4957	4419	-1.146	1543	3414	1497	2922	0
5	1	1	"YBR061C"	"YBR061C"	2120	18650	130	4379	5177	3588	79	83	25	99	98	0	5796	6824	5041	70	69	41	95	94	0	0.751	0.755	0.758	0.900	1.932	0.726	0.925	120	630	10026	11852	-0.413	4300	5726	5098	6754	0
5	2	1	"MRS5"	"YBR091C"	2290	18630	130	850	1082	870	80	84	26	92	90	0	2067	2912	2597	71	74	62	90	85	0	0.386	0.353	0.354	0.407	2.283	0.333	0.927	120	689	2766	3843	-1.374	770	1996	1002	2841	0
5	3	1	"TFC1"	"YBR123C"	2510	18640	120	1544	2463	2166	82	91	47	97	95	0	4442	7343	7085	70	99	183	93	88	0	0.334	0.327	0.331	0.401	1.988	0.304	0.921	120	625	5834	9654	-1.580	1462	4372	2381	7273	0
5	4	1	"YBR063C"	"YBR063C"	2700	18630	120	1849	2500	2010	83	93	55	95	94	0	2917	5461	4902	70	108	256	89	85	0	0.620	0.448	0.440	0.539	2.140	0.416	0.926	120	646	4613	7808	-0.689	1766	2847	2417	5391	0
5	5	1	"PHO5"	"YBR093C"	2910	18630	100	603	891	854	82	88	32	85	77	0	834	1569	1724	72	73	37	78	76	0	0.684	0.540	0.559	0.719	3.343	0.490	0.877	80	475	1283	2306	-0.549	521	762	809	1497	0
5	6	1	"PTC4"	"YBR125C"	3100	18620	120	3581	5706	5223	82	88	48	100	98	0	2799	5239	5248	70	74	51	94	94	0	1.282	1.088	1.127	1.408	1.996	1.035	0.925	120	650	6228	10793	0.359	3499	2729	5624	5169	0
5	7	1	"ECM2"	"YBR065C"	3290	18610	110	4601	5161	3816	85	109	152	92	90	0	7194	8149	6387	72	110	272	86	86	0	0.634	0.628	0.610	0.707	2.216	0.600	0.920	80	563	11638	13153	-0.657	4516	7122	5076	8077	0
5	8	1	"YBR095C"	"YBR095C"	3500	18620	120	305	740	708	84	109	147	60	46	0	1203	4537	5104	70	133	350	74	55	0	0.195	0.147	0.152	0.191	2.443	0.136	0.918	120	669	1354	5123	-2.358	221	1133	656	4467	0
5	9	1	"VMA2"	"YBR127C"	3710	18610	120	495	874	803	85	95	61	87	72	0	2390	4968	5311	72	128	332	83	70	0	0.177	0.161	0.171	0.199	2.267	0.148	0.903	120	639	2728	5685	-2.499	410	2318	789	4896	0
5	10	1	"TIP1"	"YBR067C"	3910	18600	120	1361	1984	1816	85	92	50	93	90	0	1689	4173	4151	73	104	235	83	73	0	0.790	0.463	0.485	0.585	2.369	0.432	0.916	120	639	2892	5999	-0.341	1276	1616	1899	4100	0
5	11	1	"VPS15"	"YBR097W"	4100	18600	110	618	903	780	82	89	49	92	85	0	908	1530	1557	72	89	126	80	72	0	0.641	0.563	0.559	0.711	2.456	0.499	0.880	80	552	1372	2279	-0.641	536	836	821	1458	0
5	12	1	"OPY1"	"YBR129C"	4310	18590	130	893	2098	2095	83	109	199	77	63	0	1663	4119	4286	73	129	450	67	58	0	0.509	0.498	0.496	0.594	2.504	0.481	0.944	120	721	2400	6061	-0.973	810	1590	2015	4046	0
5	13	1	"THR4"	"YCR053W"	4500	18580	120	3126	3020	2359	86	116	207	87	75	0	7858	7247	6011	74	137	467	83	68	0	0.391	0.409	0.415	0.469	2.079	0.393	0.929	120	671	10824	10107	-1.356	3040	7784	2934	7173	0
5	14	1	"YCR086W"	"YCR086W"	4730	18580	110	1478	1792	1506	86	123	227	72	63	0	3234	5606	5287	73	179	747	68	57	0	0.440	0.308	0.314	0.407	2.495	0.289	0.901	80	574	4553	7239	-1.183	1392	3161	1706	5533	0
5	15	1	"YCRX10W"	"YCRX10W"	4910	18580	110	3693	3448	2555	89	164	424	82	72	0	4239	3697	2924	75	229	878	68	60	0	0.866	0.927	0.910	1.039	1.805	0.835	0.866	80	569	7768	6981	-0.208	3604	4164	3359	3622	0
5	16	1	"YCR055C"	"YCR055C"	5110	18570	110	3350	3650	2784	92	224	702	72	63	0	6552	6731	5696	78	285	1175	68	62	0	0.503	0.535	0.527	0.761	2.841	0.500	0.919	80	559	9732	10211	-0.991	3258	6474	3558	6653	0
5	17	1	"ABP1"	"YCR088W"	5300	18580	120	776	1544	1487	95	181	555	52	45	0	1920	5777	6273	80	232	990	60	48	0	0.370	0.254	0.275	0.325	1.949	0.246	0.873	120	676	2521	7146	-1.434	681	1840	1449	5697	0
5	18	1	"YCRX12W"	"YCRX12W"	5530	18570	120	1685	2481	2166	99	118	88	90	88	0	1404	2911	2807	82	117	153	85	75	0	1.200	0.842	0.884	1.009	2.018	0.794	0.926	120	651	2908	5211	0.263	1586	1322	2382	2829	0
5	19	1	"PWP2"	"YCR057C"	5700	18560	110	1979	2139	1920	96	152	302	66	60	0	3021	4380	4341	79	160	423	66	60	0	0.640	0.475	0.469	0.579	2.150	0.453	0.901	80	554	4825	6344	-0.644	1883	2942	2043	4301	0
5	20	1	"YCR090C"	"YCR090C"	5930	18560	120	1305	2279	2080	90	134	268	75	62	0	2114	4001	4045	77	136	375	73	63	0	0.596	0.558	0.568	0.675	2.674	0.521	0.909	120	698	3252	6113	-0.745	1215	2037	2189	3924	0
5	21	1	"YCRX14W"	"YCRX14W"	6140	18560	120	217	345	272	86	93	52	75	57	0	883	2576	2945	76	80	74	88	84	0	0.162	0.104	0.117	0.154	2.900	0.095	0.888	120	712	938	2759	-2.623	131	807	259	2500	0
5	1	2	"YCR059C"	"YCR059C"	2120	18830	120	907	1460	1294	81	89	71	86	79	0	1253	3041	3049	68	81	135	84	80	0	0.697	0.464	0.454	0.587	2.393	0.427	0.910	120	540	2011	4352	-0.521	826	1185	1379	2973	0
5	2	2	"MSH3"	"YCR092C"	2340	18840	130	816	2052	2109	82	96	83	90	84	0	1797	5732	6594	72	106	214	85	81	0	0.426	0.348	0.351	0.425	2.283	0.316	0.898	120	680	2459	7630	-1.233	734	1725	1970	5660	0
5	3	2	"YCRX16C"	"YCRX16C"	2540	18830	120	576	1036	923	86	96	72	86	75	0	1354	4008	4350	72	109	227	75	71	0	0.382	0.241	0.274	0.367	2.264	0.217	0.934	120	524	1772	4886	-1.388	490	1282	950	3936	0
5	4	2	"YDR060W"	"YDR060W"	2720	18820	110	776	1084	896	85	88	32	90	87	0	1165	2021	1839	69	80	89	82	77	0	0.630	0.512	0.530	0.610	2.463	0.476	0.889	80	512	1787	2951	-0.665	691	1096	999	1952	0
5	5	2	"UBC13"	"YDR092W"	2930	18820	120	1521	2213	1829	82	88	48	96	91	0	3390	5133	4678	71	80	74	92	90	0	0.434	0.421	0.430	0.523	2.414	0.388	0.896	120	605	4758	7193	-1.206	1439	3319	2131	5062	0
5	6	2	"YDR124W"	"YDR124W"	3120	18830	120	3625	5486	4753	83	89	53	97	95	0	3062	5481	5038	71	79	81	89	87	0	1.184	0.999	1.104	1.261	2.043	0.967	0.939	120	561	6533	10813	0.244	3542	2991	5403	5410	0
5	7	2	"LCB2"	"YDR062W"	3310	18820	110	1571	2303	1938	85	113	139	86	81	0	3912	5694	5418	73	146	391	77	72	0	0.387	0.395	0.474	0.525	2.076	0.339	0.904	80	561	5325	7839	-1.369	1486	3839	2218	5621	0
5	8	2	"YDR094W"	"YDR094W"	3560	18810	130	1245	1772	1388	84	109	121	88	80	0	1514	2028	1660	72	152	400	74	65	0	0.805	0.863	0.845	0.938	1.959	0.832	0.933	120	663	2603	3644	-0.313	1161	1442	1688	1956	0
5	9	2	"YDR126W"	"YDR126W"	3720	18800	110	1385	1355	954	85	100	86	82	80	0	8535	6974	5161	74	132	381	83	73	0	0.154	0.184	0.187	0.232	2.377	0.176	0.896	80	471	9761	8170	-2.702	1300	8461	1270	6900	0
5	10	2	"RPS13"	"YDR064W"	3920	18800	110	8654	8490	5828	87	172	608	87	80	0	6172	6210	4658	76	178	565	76	72	0	1.405	1.370	1.407	1.902	2.319	1.319	0.936	80	563	14663	14537	0.491	8567	6096	8403	6134	0
5	11	2	"GIS1"	"YDR096W"	4130	18790	110	5283	5915	4840	84	176	619	82	68	0	7767	8697	7356	75	167	512	81	75	0	0.676	0.676	0.664	0.910	2.553	0.664	0.923	80	551	12891	14453	-0.565	5199	7692	5831	8622	0
5	12	2	"YDR128W"	"YDR128W"	4320	18800	120	3165	5223	4827	90	144	281	90	81	0	3394	7388	7330	77	160	417	80	75	0	0.927	0.702	0.738	0.950	2.347	0.669	0.934	120	620	6392	12444	-0.109	3075	3317	5133	7311	0
5	13	2	"YDR066C"	"YDR066C"	4530	18790	110	5996	5309	3788	90	150	320	90	80	0	9064	7220	5297	75	155	429	81	75	0	0.657	0.730	0.781	0.965	2.362	0.724	0.936	80	575	14895	12364	-0.606	5906	8989	5219	7145	0
5	14	2	"GRX3"	"YDR098C"	4750	18790	120	975	1118	881	88	121	211	71	61	0	3372	4620	4183	75	138	390	79	70	0	0.269	0.227	0.230	0.258	1.897	0.205	0.893	120	658	4184	5575	-1.894	887	3297	1030	4545	0
5	15	2	"YDR130C"	"YDR130C"	4940	18780	110	2517	2070	1355	89	159	408	72	68	0	11128	8278	5869	75	321	1365	72	68	0	0.220	0.241	0.249	0.302	1.998	0.229	0.923	80	554	13481	10184	-2.187	2428	11053	1981	8203	0
5	16	2	"SSN2"	"YDR443C"	5150	18770	110	1162	1227	779	91	180	493	73	55	0	2082	2317	1799	80	341	1427	61	32	0	0.535	0.508	0.531	0.626	2.011	0.454	0.900	80	568	3073	3373	-0.902	1071	2002	1136	2237	0
5	17	2	"YDR475C"	"YDR475C"	5330	18770	110	608	735	541	93	111	109	80	67	0	1997	3300	3114	82	119	155	80	73	0	0.269	0.200	0.207	0.292	3.007	0.174	0.824	80	517	2430	3860	-1.895	515	1915	642	3218	0
5	18	2	"GIN4"	"YDR507C"	5540	18770	100	443	459	260	95	111	108	76	66	0	617	624	429	82	110	142	76	70	0	0.650	0.672	0.644	0.697	1.985	0.605	0.837	80	505	883	906	-0.620	348	535	364	542	0
5	19	2	"YDR445C"	"YDR445C"	5740	18770	110	720	701	440	88	97	48	91	86	0	2087	1867	1388	77	88	66	83	76	0	0.314	0.342	0.354	0.413	2.200	0.315	0.895	80	536	2642	2403	-1.669	632	2010	613	1790	0
5	20	2	"SNF1"	"YDR477W"	5920	18760	100	790	895	679	88	93	30	87	85	0	2004	2020	1727	75	88	56	81	77	0	0.364	0.415	0.415	0.496	2.793	0.379	0.889	80	470	2631	2752	-1.458	702	1929	807	1945	0
5	21	2	"YDR509W"	"YDR509W"	6140	18760	100	233	264	170	86	91	27	85	76	0	354	366	308	75	83	50	71	66	0	0.527	0.612	0.604	0.620	2.176	0.525	0.753	80	524	426	469	-0.924	147	279	178	291	0
5	1	3	"RPS17B"	"YDR447C"	2130	19040	140	373	795	799	80	91	75	85	74	0	1011	3150	3796	68	89	162	88	83	0	0.311	0.232	0.275	0.288	2.240	0.203	0.863	156	741	1236	3797	-1.686	293	943	715	3082	0
5	2	3	"YDR479C"	"YDR479C"	2350	19050	130	1417	2579	2545	83	95	101	98	92	0	2379	5858	6459	71	98	233	92	86	0	0.578	0.431	0.457	0.555	2.354	0.389	0.866	120	640	3642	8283	-0.791	1334	2308	2496	5787	0
5	3	3	"YDR511W"	"YDR511W"	2560	19020	130	699	1102	946	84	92	51	92	88	0	1613	3377	3536	72	101	197	78	74	0	0.399	0.308	0.308	0.416	2.672	0.268	0.844	120	650	2156	4323	-1.325	615	1541	1018	3305	0
5	4	3	"YDR449C"	"YDR449C"	2770	19040	130	862	1720	1679	84	95	63	91	85	0	1728	3756	4042	72	110	230	82	77	0	0.470	0.444	0.446	0.534	2.680	0.414	0.887	120	678	2434	5320	-1.090	778	1656	1636	3684	0
5	5	3	"PHO8"	"YDR481C"	2960	19020	100	727	1033	906	85	96	57	83	80	0	1106	1788	1771	71	96	163	76	68	0	0.620	0.552	0.558	0.631	2.498	0.507	0.866	80	476	1677	2665	-0.689	642	1035	948	1717	0
5	6	3	"TTR1"	"YDR513W"	3170	19020	120	1126	1429	1135	86	93	44	95	92	0	2647	4013	3626	71	80	68	93	89	0	0.404	0.341	0.356	0.434	2.320	0.314	0.861	120	551	3616	5285	-1.309	1040	2576	1343	3942	0
5	7	3	"SPB4"	"YFL002C"	3340	19020	120	10739	16887	15566	85	122	311	98	95	0	2886	4801	4928	70	93	165	86	80	0	3.783	3.551	3.706	4.656	2.255	3.493	0.887	120	569	13470	21533	1.920	10654	2816	16802	4731	0
5	8	3	"HAC1"	"YFL031W"	3540	19010	110	1512	1604	1158	87	160	374	77	63	0	2947	3813	3137	73	182	505	77	68	0	0.496	0.406	0.420	0.546	3.316	0.371	0.850	80	549	4299	5257	-1.012	1425	2874	1517	3740	0
5	9	3	"YFL061W"	"YFL061W"	3760	19010	120	4073	5301	4653	89	138	226	90	85	0	3583	5302	5023	75	187	493	77	70	0	1.136	0.997	1.031	1.266	2.400	0.964	0.859	120	627	7492	10439	0.184	3984	3508	5212	5227	0
5	10	3	"YFL004W"	"YFL004W"	3950	19010	120	8494	12126	9946	87	205	599	95	90	0	3240	5044	4711	76	143	310	85	81	0	2.657	2.423	2.429	3.137	2.354	2.360	0.873	120	564	11571	17007	1.410	8407	3164	12039	4968	0
5	11	3	"RIM15"	"YFL033C"	4150	19010	120	2083	3533	3462	89	169	535	76	63	0	2492	4233	4347	78	121	243	90	80	0	0.826	0.829	0.796	0.947	2.386	0.803	0.767	120	621	4408	7599	-0.276	1994	2414	3444	4155	0
5	12	3	"YFL063W"	"YFL063W"	4370	19000	120	9638	14037	12242	95	109	97	99	96	0	12370	21289	20308	77	94	119	95	92	0	0.776	0.657	0.664	0.846	2.234	0.616	0.900	120	607	21836	35154	-0.365	9543	12293	13942	21212	0
5	13	3	"YFL006W"	"YFL006W"	4550	18990	110	11119	14635	11488	93	313	1370	88	81	0	5638	6973	5720	77	193	768	78	73	0	1.983	2.109	2.250	2.969	2.715	2.150	0.900	80	528	16587	21438	0.987	11026	5561	14542	6896	0
5	14	3	"YFL035C"	"YFL035C"	4750	18990	110	8700	8026	5933	94	349	1391	77	68	0	7814	8335	6571	79	264	919	80	71	0	1.113	0.961	1.029	1.146	1.987	0.940	0.917	80	570	16341	16188	0.154	8606	7735	7932	8256	0
5	15	3	"YFL065C"	"YFL065C"	4970	18980	110	10629	12668	9673	92	363	1544	85	75	0	17267	20371	16428	79	483	2270	80	71	0	0.613	0.620	0.629	0.750	1.867	0.597	0.897	80	576	27725	32868	-0.706	10537	17188	12576	20292	0
5	16	3	"SMC1"	"YFL008W"	5160	18980	110	4428	5353	4281	93	349	1535	72	60	0	5252	7045	6108	81	466	2291	70	52	0	0.838	0.755	0.776	0.955	2.189	0.719	0.865	80	540	9506	12224	-0.254	4335	5171	5260	6964	0
5	17	3	"YFL035C-B"	"YFL035C-B"	5360	18970	120	1725	2563	2152	90	128	180	91	80	0	2695	4278	4021	79	144	342	78	70	0	0.625	0.589	0.610	0.772	1.950	0.548	0.925	120	663	4251	6672	-0.678	1635	2616	2473	4199	0
5	18	3	"YFL067W"	"YFL067W"	5570	18970	110	11483	11416	8409	92	141	248	96	91	0	18183	20437	16689	78	178	517	88	82	0	0.629	0.556	0.570	0.718	1.904	0.519	0.935	80	552	29496	31683	-0.668	11391	18105	11324	20359	0
5	19	3	"RTG2"	"YGL252C"	5780	18960	120	4238	5633	4712	89	159	316	93	88	0	6281	8579	7816	77	191	545	82	77	0	0.669	0.652	0.676	0.889	2.401	0.619	0.949	120	531	10353	14046	-0.580	4149	6204	5544	8502	0
5	20	3	"YGR021W"	"YGR021W"	5950	18960	140	519	1398	1524	88	122	197	67	51	0	1384	4146	5097	76	138	330	66	58	0	0.330	0.322	0.334	0.492	2.854	0.313	0.881	156	710	1739	5380	-1.602	431	1308	1310	4070	0
5	21	3	"YGR053C"	"YGR053C"	6160	18960	110	2855	3403	2674	88	137	312	91	80	0	3971	4947	4222	75	157	460	81	70	0	0.710	0.680	0.717	0.888	1.892	0.661	0.948	80	577	6663	8187	-0.494	2767	3896	3315	4872	0
5	1	4	"FZF1"	"YGL254W"	2160	19220	130	359	742	800	84	165	823	27	16	0	1812	4963	6078	73	314	1526	52	39	0	0.158	0.135	0.140	0.212	2.849	0.132	0.900	120	680	2014	5548	-2.661	275	1739	658	4890	0
5	2	4	"MTL1"	"YGR023W"	2380	19240	130	1471	4773	7118	85	161	876	55	48	0	1367	4589	7385	72	199	950	54	43	0	1.070	1.038	1.042	1.347	2.832	0.976	0.921	120	638	2681	9205	0.098	1386	1295	4688	4517	0
5	3	4	"MUP1"	"YGR055W"	2580	19230	120	854	2018	2807	84	133	416	54	48	0	873	3756	5172	71	152	688	50	47	0	0.960	0.525	0.488	0.621	2.857	0.520	0.843	120	587	1572	5619	-0.059	770	802	1934	3685	0
5	4	4	"ADH4"	"YGL256W"	2790	19230	120	415	2294	3486	84	142	427	49	42	0	453	3341	5314	71	146	595	45	39	0	0.866	0.676	0.672	0.887	2.818	0.682	0.885	120	552	713	5480	-0.207	331	382	2210	3270	0
5	5	4	"YGR025W"	"YGR025W"	2970	19220	110	145	1065	1505	82	126	369	42	32	0	90	1533	2495	67	123	510	32	28	0	2.739	0.671	0.607	0.770	3.059	0.627	0.879	80	498	86	2449	1.454	63	23	983	1466	0
5	6	4	"LST7"	"YGR057C"	3160	19230	120	2086	2806	2336	85	100	76	98	96	0	3483	5133	4750	69	91	128	90	86	0	0.586	0.537	0.569	0.696	2.117	0.501	0.925	120	638	5415	7785	-0.771	2001	3414	2721	5064	0
5	7	4	"YGL258W"	"YGL258W"	3390	19210	110	1309	1539	1135	91	123	200	83	70	0	7694	8213	6660	75	160	481	83	77	0	0.160	0.178	0.186	0.234	2.340	0.170	0.937	80	511	8837	9586	-2.645	1218	7619	1448	8138	0
5	8	4	"RPS25A"	"YGR027C"	3570	19220	120	2577	4260	4040	88	223	788	70	59	0	1894	2945	2952	74	226	714	59	52	0	1.368	1.453	1.485	1.898	2.144	1.414	0.903	120	586	4309	7043	0.452	2489	1820	4172	2871	0
5	9	4	"SPR3"	"YGR059W"	3760	19200	110	3892	5160	4359	91	286	937	68	61	0	5327	6147	5321	74	231	751	73	65	0	0.724	0.835	0.850	1.080	2.077	0.855	0.931	80	510	9054	11142	-0.467	3801	5253	5069	6073	0
5	10	4	"PPA1"	"YHR026W"	3970	19200	120	2364	3569	3279	90	185	498	72	68	0	3391	5904	6098	76	175	517	75	67	0	0.686	0.597	0.590	0.789	2.430	0.550	0.929	120	602	5589	9307	-0.544	2274	3315	3479	5828	0
5	11	4	"YHR056C"	"YHR056C"	4160	19190	110	1191	1708	1422	89	127	195	86	75	0	3101	4151	3867	78	161	407	76	70	0	0.365	0.397	0.412	0.538	2.280	0.368	0.908	80	519	4125	5692	-1.456	1102	3023	1619	4073	0
5	12	4	"YHR087W"	"YHR087W"	4370	19200	100	2102	2293	1573	92	125	175	91	86	0	4412	5199	4131	77	174	516	82	73	0	0.464	0.430	0.445	0.555	1.754	0.401	0.950	80	494	6345	7323	-1.109	2010	4335	2201	5122	0
5	13	4	"DAP2"	"YHR028C"	4560	19190	110	3150	3412	2657	90	193	655	72	60	0	5857	6149	5218	77	183	547	77	68	0	0.529	0.547	0.585	0.795	2.589	0.527	0.953	80	558	8840	9394	-0.918	3060	5780	3322	6072	0
5	14	4	"MED6"	"YHR058C"	4760	19190	110	7345	7896	5721	94	238	746	88	81	0	7089	8103	6395	77	260	936	82	73	0	1.034	0.972	0.982	1.213	1.845	0.928	0.950	80	569	14263	15828	0.048	7251	7012	7802	8026	0
5	15	4	"GAR1"	"YHR089C"	4960	19180	110	2719	3044	2304	91	277	1194	65	51	0	4415	5343	4444	77	267	1109	67	60	0	0.606	0.561	0.575	0.716	2.001	0.544	0.926	80	586	6966	8219	-0.723	2628	4338	2953	5266	0
5	16	4	"SLT2"	"YHR030C"	5180	19180	120	1592	2206	2011	90	130	212	79	68	0	2666	5492	5414	78	145	363	80	67	0	0.580	0.391	0.406	0.514	2.303	0.374	0.955	120	645	4090	7530	-0.785	1502	2588	2116	5414	0
5	17	4	"VMA22"	"YHR060W"	5370	19180	110	1001	1291	1100	89	111	108	90	75	0	2149	3685	3616	77	128	275	83	75	0	0.440	0.333	0.366	0.442	2.102	0.321	0.932	80	514	2984	4810	-1.184	912	2072	1202	3608	0
5	18	4	"MSR1"	"YHR091C"	5570	19170	120	2501	3262	2612	92	124	188	92	86	0	2855	4428	4011	78	126	249	87	79	0	0.867	0.729	0.745	0.909	1.780	0.675	0.941	120	631	5186	7520	-0.205	2409	2777	3170	4350	0
5	19	4	"YHR032W"	"YHR032W"	5780	19160	120	1471	2452	2165	92	171	365	77	65	0	1769	3229	3141	77	199	588	69	55	0	0.815	0.749	0.767	0.912	2.252	0.699	0.931	120	589	3071	5512	-0.295	1379	1692	2360	3152	0
5	20	4	"RPP1"	"YHR062C"	5970	19160	100	340	638	703	88	154	339	38	26	0	436	989	1393	77	184	566	37	25	0	0.702	0.603	0.561	0.758	3.520	0.493	0.791	80	470	611	1462	-0.511	252	359	550	912	0
5	21	4	"AHT1"	"YHR093W"	6190	19170	120	813	1668	1594	88	112	223	76	60	0	2383	5504	5837	75	101	241	84	76	0	0.314	0.291	0.296	0.383	2.102	0.278	0.944	120	698	3033	7009	-1.671	725	2308	1580	5429	0
5	1	5	"PAN1"	"YIR006C"	2210	19440	130	828	1434	1254	88	138	286	86	61	0	2510	4900	4995	75	288	1352	66	47	0	0.304	0.279	0.300	0.378	2.372	0.255	0.894	120	739	3175	6171	-1.718	740	2435	1346	4825	0
5	2	5	"GTT1"	"YIR038C"	2400	19430	110	869	1022	776	89	117	164	75	63	0	3843	4930	4392	73	190	641	70	60	0	0.207	0.192	0.200	0.265	2.377	0.181	0.848	80	459	4550	5790	-2.273	780	3770	933	4857	0
5	3	5	"RNR2"	"YJL026W"	2580	19430	120	615	1005	900	86	104	98	86	74	0	1128	3086	3374	71	158	563	68	49	0	0.500	0.305	0.324	0.397	2.588	0.261	0.878	120	550	1586	3934	-0.999	529	1057	919	3015	0
5	4	5	"PRI1"	"YIR008C"	2770	19430	120	2177	6187	6998	85	291	1201	57	48	0	1035	3418	4257	74	199	756	52	44	0	2.177	1.825	2.070	2.233	2.816	1.766	0.881	120	562	3053	9446	1.122	2092	961	6102	3344	0
5	5	5	"YIR040C"	"YIR040C"	2980	19430	120	2696	4372	4163	85	349	1280	63	50	0	4158	8356	8589	72	358	1380	67	59	0	0.639	0.518	0.564	0.743	2.296	0.502	0.886	120	610	6697	12571	-0.646	2611	4086	4287	8284	0
5	6	5	"YJL028W"	"YJL028W"	3170	19420	110	1369	1245	890	91	257	707	58	46	0	2260	3054	2671	77	445	1467	55	48	0	0.585	0.388	0.386	0.466	2.268	0.410	0.877	80	523	3461	4131	-0.772	1278	2183	1154	2977	0
5	7	5	"YIR010W"	"YIR010W"	3390	19410	120	1501	2150	2072	93	166	328	80	60	0	952	2203	2582	77	239	705	54	44	0	1.609	0.968	1.125	1.179	2.190	0.854	0.887	120	654	2283	4183	0.686	1408	875	2057	2126	0
5	8	5	"YIR042C"	"YIR042C"	3590	19400	110	423	501	368	85	137	362	43	25	0	633	848	754	72	117	273	57	51	0	0.602	0.536	0.535	0.672	2.074	0.531	0.868	80	485	899	1192	-0.731	338	561	416	776	0
5	9	5	"MAD2"	"YJL030W"	3780	19410	120	1970	2636	2141	87	103	81	99	96	0	2843	4674	4224	74	96	128	94	91	0	0.680	0.554	0.556	0.651	1.851	0.519	0.930	120	617	4652	7149	-0.556	1883	2769	2549	4600	0
5	10	5	"SQT1"	"YIR012W"	3980	19400	110	6851	10370	8950	87	178	604	87	83	0	5590	7441	6756	74	151	541	77	70	0	1.226	1.396	1.458	1.935	2.139	1.393	0.935	80	551	12280	17650	0.294	6764	5516	10283	7367	0
5	11	5	"YIR044C"	"YIR044C"	4180	19400	110	1521	1706	1303	88	195	623	65	52	0	3371	3714	3172	76	217	744	66	57	0	0.435	0.445	0.453	0.622	2.447	0.424	0.901	80	568	4728	5256	-1.201	1433	3295	1618	3638	0
5	12	5	"YJL032W"	"YJL032W"	4370	19400	100	1975	2135	1672	91	240	624	67	60	0	2355	2420	2098	77	316	923	61	52	0	0.827	0.872	0.868	1.093	2.137	0.835	0.932	80	477	4162	4387	-0.274	1884	2278	2044	2343	0
5	13	5	"CAF17"	"YJR122W"	4570	19390	100	969	997	730	89	215	565	61	38	0	1615	1884	1625	77	255	718	63	52	0	0.572	0.502	0.510	0.615	2.887	0.449	0.866	80	517	2418	2715	-0.805	880	1538	908	1807	0
5	14	5	"YJR154W"	"YJR154W"	4780	19390	110	697	886	707	96	168	284	63	51	0	1484	1923	1764	77	224	590	60	52	0	0.427	0.428	0.436	0.532	2.150	0.414	0.908	80	577	2008	2636	-1.227	601	1407	790	1846	0
5	15	5	"YKL023W"	"YKL023W"	4980	19390	110	1545	1830	1532	89	151	269	77	71	0	1837	2256	2035	78	198	567	67	60	0	0.828	0.799	0.799	0.956	2.434	0.741	0.900	80	558	3215	3919	-0.273	1456	1759	1741	2178	0
5	16	5	"YJR124C"	"YJR124C"	5170	19380	110	4391	4588	3624	86	133	282	83	78	0	5981	6018	5207	75	157	449	72	67	0	0.729	0.758	0.759	1.049	2.669	0.725	0.894	80	567	10211	10445	-0.456	4305	5906	4502	5943	0
5	17	5	"THI11"	"YJR156C"	5410	19380	120	1810	2846	2506	90	132	267	83	72	0	4765	8433	8111	76	148	415	83	78	0	0.367	0.330	0.360	0.433	2.306	0.307	0.905	120	627	6409	11113	-1.447	1720	4689	2756	8357	0
5	18	5	"PAN3"	"YKL025C"	5570	19370	110	6509	6680	5137	91	165	565	82	75	0	7908	7908	6536	77	189	863	70	66	0	0.820	0.841	0.839	1.055	2.477	0.798	0.912	80	491	14249	14420	-0.287	6418	7831	6589	7831	0
5	19	5	"YJR126C"	"YJR126C"	5790	19370	120	1146	1767	1692	91	179	543	55	50	0	1379	3862	4218	76	236	922	52	48	0	0.810	0.443	0.505	0.628	2.593	0.401	0.897	120	620	2358	5462	-0.305	1055	1303	1676	3786	0
5	20	5	"HXT16"	"YJR158W"	5980	19360	110	4077	5771	5061	87	129	237	92	83	0	7971	11997	11015	76	185	652	86	73	0	0.505	0.477	0.494	0.608	2.742	0.461	0.864	80	521	11885	17605	-0.985	3990	7895	5684	11921	0
5	21	5	"YKL027W"	"YKL027W"	6170	19360	100	1464	1568	1243	89	148	398	70	61	0	1371	1791	1611	76	197	800	60	47	0	1.062	0.862	0.882	0.991	2.373	0.671	0.838	80	499	2670	3194	0.086	1375	1295	1479	1715	0
5	1	6	"YJR128W"	"YJR128W"	2190	19640	120	490	608	472	85	105	148	69	58	0	1825	2655	2602	73	137	455	69	57	0	0.231	0.203	0.220	0.287	2.809	0.178	0.830	120	640	2157	3105	-2.113	405	1752	523	2582	0
5	2	6	"YJR160C"	"YJR160C"	2410	19640	150	221	587	775	88	122	206	41	29	0	309	1212	1909	74	198	647	31	25	0	0.566	0.438	0.456	0.516	2.360	0.383	0.845	156	750	368	1637	-0.821	133	235	499	1138	0
5	3	6	"MAE1"	"YKL029C"	2600	19640	120	493	657	509	85	88	29	90	85	0	2508	4299	4037	72	77	72	88	86	0	0.167	0.135	0.147	0.173	2.554	0.124	0.904	120	542	2844	4799	-2.578	408	2436	572	4227	0
5	4	6	"SOF1"	"YLL011W"	2800	19630	130	5168	9831	10065	86	219	688	85	75	0	3276	6870	7399	75	166	515	77	69	0	1.588	1.434	1.474	1.885	2.463	1.410	0.925	120	622	8283	16540	0.667	5082	3201	9745	6795	0
5	5	6	"FPS1"	"YLL043W"	2990	19630	120	2117	3827	3807	86	176	488	77	64	0	2481	6608	7344	75	184	666	72	59	0	0.844	0.573	0.582	0.792	2.583	0.527	0.897	120	570	4437	10274	-0.244	2031	2406	3741	6533	0
5	6	6	"YLR008C"	"YLR008C"	3190	19620	110	3837	4198	3507	91	163	383	77	68	0	2478	3088	2828	73	148	346	70	65	0	1.558	1.362	1.332	1.772	2.747	1.352	0.915	80	528	6151	7122	0.639	3746	2405	4107	3015	0
5	7	6	"YLL013C"	"YLL013C"	3380	19620	120	3301	6463	6274	91	174	395	86	80	0	3142	6552	6989	75	149	349	81	75	0	1.047	0.984	1.046	1.323	2.079	0.930	0.934	120	598	6277	12849	0.066	3210	3067	6372	6477	0
5	8	6	"RPL8B"	"YLL045C"	3580	19610	120	1054	1751	1633	88	121	190	75	64	0	1735	4891	5117	75	127	256	78	71	0	0.582	0.345	0.381	0.483	2.237	0.321	0.920	120	623	2626	6479	-0.781	966	1660	1663	4816	0
5	9	6	"YLR010C"	"YLR010C"	3790	19610	120	3413	4434	3914	87	127	288	82	74	0	1798	2633	2506	74	122	279	70	65	0	1.929	1.699	1.633	2.203	2.242	1.633	0.925	120	633	5050	6906	0.948	3326	1724	4347	2559	0
5	10	6	"BPT1"	"YLL015W"	4010	19610	100	1491	1489	1080	86	141	322	77	66	0	1734	1857	1471	74	116	281	78	68	0	0.846	0.787	0.826	0.957	2.033	0.788	0.873	80	472	3065	3186	-0.241	1405	1660	1403	1783	0
5	11	6	"YLL047W"	"YLL047W"	4170	19600	110	2315	1869	1289	88	144	219	80	72	0	4248	3639	2869	75	169	397	75	66	0	0.534	0.500	0.491	0.717	2.564	0.461	0.940	80	535	6400	5345	-0.906	2227	4173	1781	3564	0
5	12	6	"YLR012C"	"YLR012C"	4400	19590	120	5918	6566	5447	89	210	529	78	71	0	2630	3371	2948	77	209	529	68	62	0	2.283	1.966	1.984	2.384	1.999	1.909	0.956	120	653	8382	9771	1.191	5829	2553	6477	3294	0
5	13	6	"YLL017W"	"YLL017W"	4610	19600	120	1126	1697	1442	86	148	414	69	52	0	2703	3783	3526	75	124	262	72	67	0	0.396	0.434	0.457	0.556	2.197	0.409	0.925	120	584	3668	5319	-1.337	1040	2628	1611	3708	0
5	14	6	"YLL049W"	"YLL049W"	4780	19590	110	1390	1284	833	91	131	209	76	72	0	5835	5321	3916	74	246	834	71	71	0	0.225	0.227	0.236	0.296	2.316	0.218	0.944	80	506	7060	6440	-2.149	1299	5761	1193	5247	0
5	15	6	"PPR1"	"YLR014C"	4980	19580	110	9930	8762	5918	91	242	710	88	80	0	9061	8049	5953	78	308	912	78	71	0	1.095	1.088	1.085	1.468	2.310	1.043	0.942	80	575	18822	16642	0.131	9839	8983	8671	7971	0
5	16	6	"YLR327C"	"YLR327C"	5190	19580	110	849	849	505	90	226	691	53	8	0	3517	2920	2098	76	245	643	73	65	0	0.221	0.267	0.274	0.382	2.447	0.252	0.877	80	578	4200	3603	-2.181	759	3441	759	2844	0
5	17	6	"ADE13"	"YLR359W"	5390	19580	100	1459	1421	931	93	126	144	85	78	0	3595	3205	2387	78	188	462	72	70	0	0.388	0.425	0.439	0.544	2.110	0.394	0.925	80	487	4883	4455	-1.364	1366	3517	1328	3127	0
5	18	6	"YLR391W"	"YLR391W"	5590	19570	100	966	931	710	91	150	263	70	57	0	2016	1965	1643	77	231	708	65	55	0	0.451	0.445	0.463	0.514	2.305	0.400	0.939	80	497	2814	2728	-1.148	875	1939	840	1888	0
5	19	6	"REC102"	"YLR329W"	5790	19570	120	673	1097	927	91	135	238	71	53	0	1545	2948	2790	75	192	641	70	51	0	0.396	0.350	0.360	0.441	2.442	0.332	0.937	120	595	2052	3879	-1.337	582	1470	1006	2873	0
5	20	6	"YLR361C"	"YLR361C"	6000	19550	110	556	1153	1666	87	96	61	87	81	0	722	1745	2561	72	90	144	86	76	0	0.722	0.637	0.613	0.628	1.658	0.586	0.939	80	565	1119	2739	-0.471	469	650	1066	1673	0
5	21	6	"ATP10"	"YLR393W"	6200	19570	100	878	1077	830	88	94	41	93	88	0	2464	3161	2782	71	84	102	88	87	0	0.330	0.320	0.328	0.395	2.190	0.300	0.939	80	514	3183	4079	-1.599	790	2393	989	3090	0
5	1	7	"YLR331C"	"YLR331C"	2210	19840	120	1151	1828	1680	88	132	221	78	60	0	3350	5401	5316	80	186	536	72	61	0	0.325	0.327	0.349	0.461	2.650	0.318	0.938	120	658	4333	7061	-1.621	1063	3270	1740	5321	0
5	2	7	"NMD4"	"YLR363C"	2420	19840	120	1171	2184	2026	87	168	433	66	52	0	1143	2275	2187	76	221	686	55	47	0	1.016	0.954	0.955	1.082	2.397	0.934	0.905	120	540	2151	4296	0.023	1084	1067	2097	2199	0
5	3	7	"COX8"	"YLR395C"	2610	19840	120	1777	2375	1976	86	160	422	78	64	0	2822	3489	3013	72	176	527	74	68	0	0.615	0.670	0.682	0.743	2.315	0.657	0.884	120	564	4441	5706	-0.702	1691	2750	2289	3417	0
5	4	7	"RPS25B"	"YLR333C"	2810	19830	110	6367	5620	3930	85	220	683	80	72	0	5537	4343	3205	75	205	601	71	68	0	1.150	1.297	1.341	1.759	2.743	1.288	0.894	80	531	11744	9803	0.202	6282	5462	5535	4268	0
5	5	7	"YLR365W"	"YLR365W"	3000	19820	110	2030	1703	1086	88	226	693	70	58	0	5869	4690	3284	76	282	895	75	67	0	0.335	0.350	0.338	0.421	2.702	0.345	0.864	80	540	7735	6229	-1.577	1942	5793	1615	4614	0
5	6	7	"AFG2"	"YLR397C"	3210	19820	110	2386	2311	1589	89	139	248	80	76	0	10095	8493	6255	76	241	788	76	71	0	0.229	0.264	0.266	0.348	2.674	0.252	0.893	80	555	12316	10639	-2.125	2297	10019	2222	8417	0
5	7	7	"YMR097C"	"YMR097C"	3390	19820	100	1818	1789	1183	88	107	88	91	87	0	5952	5306	3823	75	163	412	78	77	0	0.294	0.325	0.336	0.438	2.640	0.303	0.885	80	469	7607	6932	-1.764	1730	5877	1701	5231	0
5	8	7	"ECM16"	"YMR128W"	3590	19810	100	1360	1313	852	87	96	48	87	85	0	2753	2554	2055	76	101	155	82	80	0	0.476	0.495	0.482	0.603	2.583	0.407	0.809	80	494	3950	3704	-1.072	1273	2677	1226	2478	0
5	9	7	"YMR158W"	"YMR158W"	3790	19810	110	2668	2406	1573	88	114	149	88	85	0	5184	4263	3165	75	119	259	78	77	0	0.505	0.553	0.538	0.670	2.407	0.502	0.880	80	558	7689	6506	-0.986	2580	5109	2318	4188	0
5	10	7	"YMR099C"	"YMR099C"	3990	19800	110	1608	1468	941	86	119	172	83	77	0	5652	4803	3433	75	151	417	77	76	0	0.273	0.292	0.293	0.364	2.584	0.267	0.854	80	548	7099	6110	-1.874	1522	5577	1382	4728	0
5	11	7	"YMR130W"	"YMR130W"	4180	19800	110	2438	2270	1574	86	144	341	80	75	0	2510	2294	1719	77	163	466	73	67	0	0.967	0.985	0.962	1.097	3.156	0.951	0.785	80	555	4785	4401	-0.049	2352	2433	2184	2217	0
5	12	7	"APG16"	"YMR159C"	4390	19790	110	947	811	549	88	146	340	66	55	0	4836	4337	3289	77	203	642	75	68	0	0.181	0.170	0.171	0.219	3.357	0.158	0.853	80	564	5618	4983	-2.470	859	4759	723	4260	0
5	13	7	"SRT1"	"YMR101C"	4580	19780	110	2307	2262	1638	87	129	246	81	73	0	3531	3428	2706	79	201	648	72	65	0	0.643	0.649	0.645	0.835	2.797	0.636	0.857	80	552	5672	5524	-0.637	2220	3452	2175	3349	0
5	14	7	"YMR132C"	"YMR132C"	4820	19780	110	985	888	618	88	111	134	76	70	0	4572	3823	2793	75	151	392	78	71	0	0.199	0.213	0.221	0.249	2.553	0.200	0.846	80	570	5394	4548	-2.326	897	4497	800	3748	0
5	15	7	"HLJ1"	"YMR161W"	4990	19780	90	474	641	528	90	112	100	84	71	0	744	1134	1074	76	154	361	67	46	0	0.575	0.521	0.535	0.576	2.988	0.411	0.746	52	398	1052	1609	-0.799	384	668	551	1058	0
5	16	7	"YMR103C"	"YMR103C"	5210	19780	110	449	616	495	89	104	77	91	75	0	1791	1624	1243	77	112	206	77	73	0	0.210	0.341	0.273	0.338	2.787	0.310	0.699	80	581	2074	2074	-2.251	360	1714	527	1547	0
5	17	7	"YMR134W"	"YMR134W"	5400	19770	110	1740	1663	1230	88	104	83	87	83	0	7246	6071	4669	77	127	277	82	78	0	0.230	0.263	0.261	0.290	2.388	0.256	0.862	80	538	8821	7569	-2.118	1652	7169	1575	5994	0
5	18	7	"YMR163C"	"YMR163C"	5590	19770	110	2199	1952	1237	91	117	135	85	78	0	6034	4595	3166	77	177	507	78	76	0	0.354	0.412	0.417	0.501	2.103	0.383	0.904	80	565	8065	6379	-1.499	2108	5957	1861	4518	0
5	19	7	"YNL144C"	"YNL144C"	5800	19760	120	4415	6647	5870	92	124	180	96	88	0	4766	7782	7398	76	169	576	75	70	0	0.922	0.851	0.875	1.177	2.731	0.811	0.922	120	614	9013	14261	-0.118	4323	4690	6555	7706	0
5	20	7	"YNL176C"	"YNL176C"	6000	19760	110	4565	3966	2456	89	114	151	92	88	0	18621	14787	9961	73	141	442	86	85	0	0.241	0.263	0.271	0.332	2.101	0.247	0.910	80	581	23024	18591	-2.051	4476	18548	3877	14714	0
5	21	7	"YNL208W"	"YNL208W"	6210	19760	110	699	606	371	90	106	63	80	70	0	4104	3318	2417	75	157	304	73	70	0	0.151	0.159	0.169	0.215	2.818	0.148	0.883	80	580	4638	3759	-2.726	609	4029	516	3243	0
5	1	8	"YNL146W"	"YNL146W"	2220	20040	110	1071	982	713	86	110	116	76	66	0	3274	3101	2512	76	146	384	68	67	0	0.308	0.296	0.303	0.387	2.586	0.283	0.904	80	521	4183	3921	-1.699	985	3198	896	3025	0
5	2	8	"RPS3"	"YNL178W"	2420	20040	120	416	548	395	87	113	119	74	57	0	2270	4066	3660	75	173	443	80	72	0	0.150	0.116	0.120	0.154	2.356	0.106	0.878	120	582	2524	4452	-2.738	329	2195	461	3991	0
5	3	8	"MER1"	"YNL210W"	2620	20040	120	862	1346	1167	87	105	103	80	75	0	2059	3621	3452	75	151	390	74	66	0	0.391	0.355	0.363	0.453	2.499	0.327	0.875	120	559	2759	4805	-1.356	775	1984	1259	3546	0
5	4	8	"ALF1"	"YNL148C"	2830	20030	100	461	467	269	87	113	148	75	58	0	1738	1517	1092	77	139	335	76	63	0	0.225	0.264	0.261	0.297	2.183	0.246	0.809	80	492	2035	1820	-2.151	374	1661	380	1440	0
5	5	8	"RHO5"	"YNL180C"	3020	20020	110	2367	2182	1446	89	139	209	87	80	0	7448	6912	5198	77	236	665	75	73	0	0.309	0.306	0.322	0.487	3.576	0.280	0.888	80	547	9649	8928	-1.694	2278	7371	2093	6835	0
5	6	8	"YNL212W"	"YNL212W"	3210	20020	110	254	458	484	86	140	232	38	25	0	522	843	966	77	254	785	31	16	0	0.378	0.486	0.416	0.435	1.990	0.332	0.784	80	538	613	1138	-1.405	168	445	372	766	0
5	7	8	"YNL150W"	"YNL150W"	3400	20010	110	2752	2396	1672	91	149	245	81	75	0	5213	4736	3452	78	233	657	76	73	0	0.518	0.495	0.499	0.684	2.879	0.475	0.894	80	570	7796	6963	-0.948	2661	5135	2305	4658	0
5	8	8	"YNL182C"	"YNL182C"	3650	20010	120	2102	2727	2022	88	128	199	89	84	0	5332	7186	5814	76	155	427	83	80	0	0.383	0.371	0.366	0.464	2.540	0.346	0.897	120	671	7270	9749	-1.384	2014	5256	2639	7110	0
5	9	8	"PEX17"	"YNL214W"	3830	20010	110	4065	3600	2727	89	142	300	78	73	0	6963	5879	4772	76	163	539	73	67	0	0.577	0.605	0.626	0.861	3.048	0.577	0.924	80	496	10863	9314	-0.793	3976	6887	3511	5803	0
5	10	8	"MSB4"	"YOL112W"	4000	20000	110	918	1105	880	86	171	364	67	52	0	2738	2998	2875	76	286	906	65	52	0	0.313	0.349	0.357	0.441	3.100	0.309	0.810	80	523	3494	3941	-1.678	832	2662	1019	2922	0
5	11	8	"NOP8"	"YOL144W"	4210	20000	120	604	1449	1510	87	139	249	64	50	0	1073	3406	3891	76	207	691	57	45	0	0.519	0.409	0.410	0.468	2.734	0.378	0.886	120	663	1514	4692	-0.947	517	997	1362	3330	0
5	12	8	"TIR2"	"YOR010C"	4420	20000	100	2126	2346	1853	89	189	560	70	62	0	1581	1944	1699	78	182	527	67	55	0	1.355	1.210	1.203	1.511	2.553	1.159	0.857	80	488	3540	4123	0.439	2037	1503	2257	1866	0
5	13	8	"YOL114C"	"YOL114C"	4600	19990	110	1505	1409	1028	88	175	518	65	57	0	3295	2831	2152	77	168	484	68	65	0	0.440	0.480	0.485	0.531	2.212	0.550	0.764	80	572	4635	4075	-1.183	1417	3218	1321	2754	0
5	14	8	"YOL146W"	"YOL146W"	4820	19990	100	1127	1375	1049	88	107	95	83	80	0	4618	3988	3298	77	131	298	71	66	0	0.229	0.329	0.338	0.477	3.633	0.307	0.864	80	488	5580	5198	-2.128	1039	4541	1287	3911	0
5	15	8	"YOR012W"	"YOR012W"	4990	19980	100	2046	2437	1890	89	130	251	83	75	0	2772	2981	2513	78	168	539	68	65	0	0.726	0.809	0.815	1.003	2.984	0.721	0.804	80	494	4651	5251	-0.461	1957	2694	2348	2903	0
5	16	8	"MSN1"	"YOL116W"	5200	19980	110	3118	3530	2798	91	161	396	82	75	0	3214	3796	3435	78	185	602	70	62	0	0.965	0.925	0.932	1.299	2.979	0.852	0.838	80	562	6163	7157	-0.051	3027	3136	3439	3718	0
5	17	8	"SPT20"	"YOL148C"	5400	19970	100	1450	1551	1336	91	150	362	72	62	0	2318	2700	2420	78	159	460	70	65	0	0.607	0.557	0.523	0.629	2.939	0.537	0.869	80	485	3599	4082	-0.721	1359	2240	1460	2622	0
5	18	8	"RTS1"	"YOR014W"	5600	19980	100	1455	1575	1235	89	105	99	86	85	0	1671	2078	1838	76	110	209	80	71	0	0.856	0.742	0.712	0.907	2.969	0.673	0.856	80	500	2961	3488	-0.224	1366	1595	1486	2002	0
5	19	8	"YOL118C"	"YOL118C"	5810	19960	100	2301	2311	1605	87	125	173	81	78	0	2713	2321	1785	76	119	213	76	70	0	0.840	0.991	0.945	1.042	2.837	0.925	0.846	80	517	4851	4469	-0.252	2214	2637	2224	2245	0
5	20	8	"YOL150C"	"YOL150C"	6030	19970	100	318	332	191	89	118	163	63	27	0	878	1162	949	77	124	228	71	62	0	0.286	0.224	0.222	0.312	3.150	0.178	0.667	80	500	1030	1328	-1.806	229	801	243	1085	0
5	21	8	"ERP4"	"YOR016C"	6210	19960	100	6129	5879	4588	91	169	519	81	71	0	5036	5322	4380	75	177	597	73	67	0	1.217	1.103	1.125	1.411	2.652	1.092	0.899	80	482	10999	11035	0.283	6038	4961	5788	5247	0
5	1	9	"SCD5"	"YOR329C"	2240	20230	140	4041	6038	5408	84	100	93	98	96	0	4364	7062	6778	76	115	303	89	87	0	0.923	0.852	0.863	0.989	2.096	0.814	0.916	156	792	8245	12940	-0.116	3957	4288	5954	6986	0
5	2	9	"PRT1"	"YOR361C"	2390	20230	110	4304	3774	2919	86	123	201	90	83	0	6103	5786	4641	74	132	319	82	76	0	0.700	0.646	0.678	0.813	2.384	0.642	0.885	80	435	10247	9400	-0.515	4218	6029	3688	5712	0
5	3	9	"ERR1"	"YOR393W"	2610	20220	130	2873	3086	2430	89	129	200	91	85	0	6724	9387	8111	78	181	478	85	80	0	0.419	0.322	0.329	0.430	2.223	0.301	0.931	120	657	9430	12306	-1.255	2784	6646	2997	9309	0
5	4	9	"YOR331C"	"YOR331C"	2800	20220	110	2052	1976	1376	89	150	262	80	72	0	5360	5562	4185	79	279	828	76	72	0	0.372	0.344	0.334	0.411	2.322	0.324	0.912	80	534	7244	7370	-1.428	1963	5281	1887	5483	0
5	5	9	"PIP2"	"YOR363C"	3010	20230	120	793	1177	992	89	145	239	75	56	0	1596	2740	2720	78	255	744	62	50	0	0.464	0.409	0.442	0.571	2.733	0.361	0.860	120	582	2222	3750	-1.109	704	1518	1088	2662	0
5	6	9	"HAT1"	"YPL001W"	3190	20210	110	5868	5254	4066	88	161	411	80	72	0	2549	2273	1829	77	139	296	71	66	0	2.338	2.352	2.415	2.492	1.671	2.332	0.891	80	540	8252	7362	1.225	5780	2472	5166	2196	0
5	7	9	"YOR333C"	"YOR333C"	3400	20210	110	4336	4112	2937	93	381	1186	71	62	0	5584	5190	4130	80	414	1427	66	60	0	0.771	0.786	0.786	1.022	2.212	0.768	0.919	80	548	9747	9129	-0.375	4243	5504	4019	5110	0
5	8	9	"YOR365C"	"YOR365C"	3600	20210	100	3502	3500	2517	94	362	1202	71	58	0	5330	6243	5185	80	468	1598	70	61	0	0.649	0.553	0.558	0.807	2.587	0.503	0.900	80	486	8658	9569	-0.623	3408	5250	3406	6163	0
5	9	9	"ULA1"	"YPL003W"	3810	20210	110	14956	15323	11349	92	367	1631	83	78	0	5336	5645	4744	78	290	1140	70	62	0	2.827	2.736	2.839	3.758	2.262	2.527	0.897	80	552	20122	20798	1.499	14864	5258	15231	5567	0
5	10	9	"ALA1"	"YOR335C"	4030	20190	110	1958	2416	1909	91	348	1615	57	31	0	6788	9099	7801	80	301	1105	76	72	0	0.278	0.258	0.251	0.308	2.363	0.248	0.905	80	555	8575	11344	-1.845	1867	6708	2325	9019	0
5	11	9	"SCP1"	"YOR367W"	4220	20200	110	2519	2362	1655	87	113	123	85	77	0	6200	5672	4210	78	187	588	77	73	0	0.397	0.407	0.400	0.467	2.093	0.375	0.921	80	544	8554	7869	-1.332	2432	6122	2275	5594	0
5	12	9	"YPL005W"	"YPL005W"	4420	20190	110	5129	5430	4367	87	144	315	85	81	0	1533	1692	1513	78	152	434	67	60	0	3.465	3.310	3.662	3.748	2.626	3.160	0.818	80	544	6497	6957	1.793	5042	1455	5343	1614	0
5	13	9	"VMA13"	"YPR036W"	4590	20190	110	2243	2376	1902	90	182	476	71	63	0	4552	5572	4914	79	212	703	68	65	0	0.481	0.416	0.428	0.509	2.320	0.395	0.876	80	568	6626	7779	-1.055	2153	4473	2286	5493	0
5	14	9	"HOS1"	"YPR068C"	4820	20180	110	2299	2197	1686	90	161	426	67	60	0	9571	10111	8133	81	304	1185	77	71	0	0.233	0.210	0.214	0.271	2.989	0.205	0.916	80	605	11699	12137	-2.103	2209	9490	2107	10030	0
5	15	9	"YPR100W"	"YPR100W"	5030	20180	110	945	997	700	92	145	285	71	63	0	5576	5566	4540	81	377	1417	67	60	0	0.155	0.165	0.166	0.229	3.103	0.156	0.883	80	513	6348	6390	-2.688	853	5495	905	5485	0
5	16	9	"YPR038W"	"YPR038W"	5210	20180	120	1435	1620	1241	91	123	185	82	72	0	3598	4100	3438	78	228	870	70	60	0	0.382	0.380	0.387	0.493	2.639	0.335	0.872	120	607	4864	5551	-1.389	1344	3520	1529	4022	0
5	17	9	"MED1"	"YPR070W"	5420	20160	120	1726	2597	2451	94	110	90	89	82	0	2835	4967	4923	78	115	212	83	75	0	0.592	0.512	0.526	0.602	2.292	0.492	0.920	120	598	4389	7392	-0.756	1632	2757	2503	4889	0
5	18	9	"RPL11A"	"YPR102C"	5610	20170	120	1206	2057	1974	91	122	167	80	66	0	2044	4623	4850	77	157	446	71	61	0	0.567	0.432	0.470	0.531	2.322	0.409	0.936	120	592	3082	6512	-0.819	1115	1967	1966	4546	0
5	19	9	"YPR040W"	"YPR040W"	5810	20160	110	2250	2387	1708	92	163	346	82	72	0	6155	7465	5932	77	311	1184	77	71	0	0.355	0.311	0.323	0.378	1.962	0.294	0.927	80	560	8236	9683	-1.494	2158	6078	2295	7388	0
5	20	9	"NOT5"	"YPR072W"	6020	20170	120	1868	2583	2259	93	149	307	83	73	0	2619	4591	4386	78	264	1065	67	52	0	0.699	0.552	0.605	0.750	2.241	0.520	0.928	120	630	4316	7003	-0.518	1775	2541	2490	4513	0
5	21	9	"FHL1"	"YPR104C"	6230	20160	120	1374	2344	2149	92	120	139	85	74	0	2860	4820	4667	76	136	415	71	60	0	0.460	0.475	0.483	0.594	2.200	0.454	0.935	120	625	4066	6996	-1.119	1282	2784	2252	4744	0
5	1	10	"YPR042C"	"YPR042C"	2200	20430	90	137	270	331	85	89	27	63	48	0	156	343	542	76	81	48	59	40	0	0.650	0.693	0.717	0.604	3.345	0.535	0.677	52	400	132	452	-0.621	52	80	185	267	0
5	2	10	"TKL1"	"YPR074C"	2420	20430	120	970	1656	1388	86	98	62	94	91	0	2514	4221	3984	76	111	230	85	79	0	0.363	0.379	0.390	0.501	2.357	0.346	0.893	120	679	3322	5715	-1.464	884	2438	1570	4145	0
5	3	10	"ISR1"	"YPR106W"	2630	20420	110	2095	2796	2185	89	112	118	95	92	0	3694	4953	4292	77	150	372	87	76	0	0.555	0.555	0.594	0.642	2.097	0.531	0.883	80	570	5623	7583	-0.850	2006	3617	2707	4876	0
5	4	10	"EMPTY"	"EMPTY"	2840	20420	110	280	395	376	86	111	104	68	47	0	388	643	846	75	135	285	53	31	0	0.620	0.544	0.612	0.705	3.341	0.409	0.668	80	486	507	877	-0.690	194	313	309	568	0
5	5	10	"EMPTY"	"EMPTY"	3000	20420	150	98	146	197	85	114	156	6	5	0	86	166	389	75	147	421	5	1	0	1.182	0.670	0.821	0.843	3.214	0.382	0.467	156	767	24	152	0.241	13	11	61	91	-50
5	6	10	"EMPTY"	"EMPTY"	3240	20420	100	160	271	374	85	89	29	77	56	0	208	406	752	75	74	24	73	70	0	0.564	0.562	0.546	0.626	2.499	0.461	0.719	80	450	208	517	-0.826	75	133	186	331	-100
5	7	10	"EMPTY"	"EMPTY"	3400	20410	150	98	122	101	90	260	960	0	0	0	83	129	216	78	267	1143	1	0	0	1.600	0.627	0.833	0.922	3.361	0.547	0.346	156	700	13	83	0.678	8	5	32	51	-100
5	8	10	"EMPTY"	"EMPTY"	3600	20410	150	92	128	146	90	204	679	1	0	0	78	125	219	77	236	946	1	0	0	2.000	0.792	0.913	0.859	4.647	0.618	0.605	156	729	3	86	1.000	2	1	38	48	-100
5	9	10	"EMPTY"	"EMPTY"	3800	20400	150	96	122	88	91	268	1359	0	0	0	83	110	133	78	204	903	0	0	0	1.000	0.969	0.696	0.773	3.717	0.897	0.564	156	698	10	63	0.000	5	5	31	32	-100
5	10	10	"EMPTY"	"EMPTY"	4000	20400	150	99	132	165	90	212	1096	1	0	0	82	134	250	80	191	793	1	0	0	4.500	0.778	0.691	0.804	3.450	0.379	0.411	156	808	11	96	2.170	9	2	42	54	-100
5	11	10	"EMPTY"	"EMPTY"	4230	20390	80	116	161	152	86	89	25	51	40	0	89	174	406	78	80	32	32	23	0	2.727	0.781	0.832	0.822	4.228	0.361	0.720	52	340	41	171	1.447	30	11	75	96	-100
5	12	10	"EMPTY"	"EMPTY"	4430	20410	90	133	204	201	85	88	24	65	50	0	131	267	323	78	82	64	46	32	0	0.906	0.630	0.431	0.525	3.324	0.547	0.619	52	396	101	308	-0.143	48	53	119	189	-100
5	13	10	"EMPTY"	"EMPTY"	4640	20400	100	155	243	324	86	89	25	76	63	0	112	266	561	77	84	85	30	10	0	1.971	0.831	0.943	1.497	4.304	0.562	0.798	80	516	104	346	0.979	69	35	157	189	-100
5	14	10	"EMPTY"	"EMPTY"	4840	20390	80	150	360	603	89	91	25	69	53	0	105	500	1068	78	79	43	46	36	0	2.259	0.642	0.900	0.893	3.475	0.424	0.613	52	292	88	693	1.176	61	27	271	422	-100
5	15	10	"EMPTY"	"EMPTY"	5000	20380	150	93	108	80	91	116	187	1	0	0	80	105	134	81	201	812	0	0	0	-2.000	0.708	0.955	1.062	4.746	0.506	0.510	156	846	1	41	Error	2	-1	17	24	-50
5	16	10	"iYAL056W"	"iYAL056W"	5240	20380	110	1403	1851	1450	92	178	539	71	56	0	1560	2192	1859	79	197	711	63	51	0	0.885	0.832	0.862	0.968	1.774	0.793	0.909	80	536	2792	3872	-0.176	1311	1481	1759	2113	0
5	17	10	"iYAL051W"	"iYAL051W"	5420	20370	110	388	425	300	93	211	568	27	1	0	645	645	524	79	247	761	38	2	0	0.521	0.587	0.559	0.628	2.604	0.686	0.863	80	562	861	898	-0.940	295	566	332	566	0
5	18	10	"iYAL046C"	"iYAL046C"	5640	20370	100	279	302	167	90	145	259	38	3	0	1211	1129	833	79	178	416	65	58	0	0.167	0.202	0.217	0.254	2.600	0.208	0.712	80	470	1321	1262	-2.582	189	1132	212	1050	0
5	19	10	"iYAL031C"	"iYAL031C"	5810	20370	110	1732	1835	1286	94	198	529	73	60	0	3118	3266	2444	80	286	1001	67	57	0	0.539	0.546	0.586	0.640	1.850	0.524	0.921	80	557	4676	4927	-0.891	1638	3038	1741	3186	0
5	20	10	"iYAL027W"	"iYAL027W"	6030	20360	110	1180	1365	1058	92	197	532	63	51	0	1837	1963	1604	78	279	1021	56	46	0	0.619	0.675	0.630	0.737	1.798	0.630	0.896	80	547	2847	3158	-0.693	1088	1759	1273	1885	0
5	21	10	"iYAL023C"	"iYAL023C"	6220	20350	110	632	940	808	92	149	274	65	50	0	2171	2526	2257	78	233	801	58	52	0	0.258	0.346	0.328	0.404	2.191	0.343	0.830	80	554	2633	3296	-1.955	540	2093	848	2448	0
5	1	11	"iYAL007C"	"iYAL007C"	2250	20630	130	2638	4173	3695	85	107	181	94	88	0	1852	3353	3113	75	106	258	87	74	0	1.437	1.247	1.252	1.471	2.118	1.215	0.879	120	735	4330	7366	0.523	2553	1777	4088	3278	0
5	2	11	"iYAL003W"	"iYAL003W"	2440	20640	130	3186	4359	3778	86	135	306	89	75	0	1978	3388	3147	76	146	399	74	63	0	1.630	1.290	1.365	1.812	2.900	1.214	0.875	120	632	5002	7585	0.705	3100	1902	4273	3312	0
5	3	11	"iYAR002W"	"iYAR002W"	2650	20640	120	3751	5630	4651	86	119	266	95	87	0	1215	2017	1815	74	114	305	75	61	0	3.212	2.853	2.882	3.377	2.304	2.843	0.833	120	602	4806	7487	1.684	3665	1141	5544	1943	0
5	4	11	"itL(CAA)A"	"itL(CAA)A"	2840	20630	120	470	876	828	80	91	111	75	61	0	1433	3063	3310	71	85	120	80	77	0	0.286	0.266	0.281	0.363	3.132	0.244	0.834	120	565	1752	3788	-1.804	390	1362	796	2992	0
5	5	11	"iYAR028W"	"iYAR028W"	3030	20620	120	1099	1866	1539	81	95	104	97	87	0	1508	2703	2407	74	104	242	88	80	0	0.710	0.679	0.665	0.770	2.158	0.622	0.845	120	571	2452	4414	-0.494	1018	1434	1785	2629	0
5	6	11	"iYAR035W"	"iYAR035W"	3260	20630	130	712	1022	873	85	97	98	88	79	0	1215	1923	1715	76	99	221	80	73	0	0.550	0.507	0.508	0.594	2.415	0.485	0.865	120	631	1766	2784	-0.861	627	1139	937	1847	0
5	7	11	"iYBR162C"	"iYBR162C"	3430	20610	120	896	1449	1221	85	97	89	90	80	0	1115	2120	2018	77	107	243	79	68	0	0.781	0.668	0.653	0.805	2.744	0.604	0.862	120	544	1849	3407	-0.356	811	1038	1364	2043	0
5	8	11	"iYBR165W"	"iYBR165W"	3640	20610	100	283	291	167	90	108	97	62	48	0	400	488	396	78	119	228	52	45	0	0.599	0.490	0.519	0.517	2.829	0.432	0.734	80	467	515	611	-0.738	193	322	201	410	0
5	9	11	"iYBR169C"	"iYBR169C"	3840	20600	120	543	715	535	90	100	47	90	82	0	1400	2139	1885	82	101	107	84	80	0	0.344	0.304	0.283	0.364	2.658	0.270	0.839	120	591	1771	2682	-1.541	453	1318	625	2057	0
5	10	11	"iYBR187W"	"iYBR187W"	4040	20600	120	550	667	480	89	94	39	90	86	0	1752	2490	2251	78	105	202	80	72	0	0.275	0.240	0.253	0.310	2.549	0.209	0.846	120	568	2135	2990	-1.860	461	1674	578	2412	0
5	11	11	"iYBR192W"	"iYBR192W"	4230	20600	110	2231	2561	1980	90	104	86	91	85	0	2988	2948	2423	79	108	186	77	73	0	0.736	0.861	0.885	1.077	2.353	0.816	0.879	80	554	5050	5340	-0.442	2141	2909	2471	2869	0
5	12	11	"iYBR196C"	"iYBR196C"	4440	20590	120	697	856	656	87	99	81	87	77	0	2299	3825	3539	79	101	158	84	83	0	0.275	0.205	0.203	0.251	2.761	0.176	0.816	120	631	2830	4515	-1.864	610	2220	769	3746	0
5	13	11	"iYBRCdelta19"	"iYBRCdelta19"	4650	20590	120	760	1173	1053	87	97	87	83	76	0	1736	3411	3583	80	118	299	76	67	0	0.406	0.326	0.341	0.391	2.456	0.287	0.858	120	610	2329	4417	-1.299	673	1656	1086	3331	0
5	14	11	"iYBR212W"	"iYBR212W"	4850	20590	120	1658	2219	1807	87	98	89	94	89	0	2347	3170	2761	80	120	305	81	76	0	0.693	0.690	0.683	0.748	1.958	0.647	0.886	120	584	3838	5222	-0.529	1571	2267	2132	3090	0
5	15	11	"iYBR216C"	"iYBR216C"	5020	20580	110	1446	1420	991	91	108	105	86	78	0	3099	3368	2779	82	131	310	77	71	0	0.449	0.404	0.408	0.539	2.827	0.366	0.839	80	502	4372	4615	-1.155	1355	3017	1329	3286	0
5	16	11	"iYBR237W"	"iYBR237W"	5250	20580	120	1234	1696	1441	90	129	321	78	60	0	1779	2452	2342	78	151	473	71	61	0	0.673	0.676	0.680	0.777	1.878	0.621	0.905	120	671	2845	3980	-0.572	1144	1701	1606	2374	0
5	17	11	"iYBR241C"	"iYBR241C"	5450	20570	110	1028	1018	613	91	105	76	90	83	0	2727	2533	1834	79	121	221	81	76	0	0.354	0.378	0.379	0.487	2.384	0.342	0.897	80	518	3585	3381	-1.499	937	2648	927	2454	0
5	18	11	"iYBR246W"	"iYBR246W"	5630	20570	120	430	548	386	90	104	75	79	66	0	907	1942	1835	79	122	217	70	64	0	0.411	0.246	0.252	0.343	2.574	0.215	0.858	120	589	1168	2321	-1.284	340	828	458	1863	0
5	19	11	"iYDL140C"	"iYDL140C"	5830	20570	110	1278	1205	783	91	140	238	76	68	0	2250	1977	1460	79	161	395	72	63	0	0.547	0.587	0.611	0.738	2.176	0.549	0.900	80	541	3358	3012	-0.871	1187	2171	1114	1898	0
5	20	11	"iYDL136W"	"iYDL136W"	6030	20560	110	1294	1323	976	91	147	230	75	67	0	3112	2788	2257	80	181	414	70	63	0	0.397	0.455	0.477	0.585	2.413	0.420	0.882	80	568	4235	3940	-1.334	1203	3032	1232	2708	0
5	21	11	"iYDL133W"	"iYDL133W"	6230	20560	100	666	707	457	93	125	122	86	72	0	1008	1007	746	81	154	298	73	57	0	0.618	0.663	0.658	0.736	2.016	0.632	0.894	80	496	1500	1540	-0.694	573	927	614	926	0
5	1	12	"iYDL117W"	"iYDL117W"	2250	20840	120	357	460	313	83	94	107	76	60	0	1114	1862	1646	74	96	233	78	74	0	0.263	0.211	0.211	0.250	2.338	0.186	0.874	120	695	1314	2165	-1.924	274	1040	377	1788	0
5	2	12	"iYDL113C"	"iYDL113C"	2460	20840	120	1088	1736	1477	86	126	266	84	59	0	861	1764	1657	75	143	380	70	50	0	1.275	0.977	1.018	1.232	2.135	0.920	0.921	120	572	1788	3339	0.350	1002	786	1650	1689	0
5	3	12	"iYDL109C"	"iYDL109C"	2670	20840	130	396	603	463	86	111	165	71	45	0	791	1729	1679	74	111	210	80	65	0	0.432	0.312	0.328	0.353	2.546	0.284	0.794	120	627	1027	2172	-1.210	310	717	517	1655	0
5	4	12	"iYDL090C"	"iYDL090C"	2880	20830	120	607	762	588	81	90	47	89	83	0	1426	2673	2557	74	105	180	80	75	0	0.389	0.262	0.253	0.329	2.643	0.228	0.824	120	559	1878	3280	-1.362	526	1352	681	2599	0
5	5	12	"iYDL086W"	"iYDL086W"	3050	20820	130	669	943	765	83	114	152	79	66	0	1428	2228	2107	76	157	381	73	63	0	0.433	0.400	0.409	0.514	2.574	0.355	0.849	120	571	1938	3012	-1.206	586	1352	860	2152	0
5	6	12	"iYDL082W"	"iYDL082W"	3240	20830	120	366	421	254	90	132	144	68	47	0	866	1352	1080	84	178	361	72	51	0	0.353	0.261	0.246	0.294	2.106	0.233	0.702	120	498	1058	1599	-1.503	276	782	331	1268	0
5	7	12	"iYDL065C"	"iYDL065C"	3440	20830	140	1100	1316	1000	89	113	100	87	80	0	1359	1639	1310	83	125	211	78	66	0	0.792	0.789	0.827	0.925	2.334	0.765	0.873	156	630	2287	2783	-0.336	1011	1276	1227	1556	0
5	8	12	"iYDL060W"	"iYDL060W"	3630	20810	130	545	590	361	87	96	38	95	91	0	1562	1743	1331	79	95	138	88	84	0	0.309	0.302	0.307	0.356	2.293	0.265	0.835	120	630	1941	2167	-1.695	458	1483	503	1664	0
5	9	12	"iYDL056W"	"iYDL056W"	3820	20810	110	2130	1993	1390	92	115	120	96	86	0	944	899	624	83	101	93	80	73	0	2.367	2.330	2.355	2.601	2.277	2.376	0.854	80	511	2899	2717	1.243	2038	861	1901	816	0
5	10	12	"iYDRWdelta12"	"iYDRWdelta12"	4020	20810	120	363	403	265	85	103	108	64	52	0	1341	1889	1701	78	94	116	77	74	0	0.220	0.176	0.183	0.246	2.837	0.149	0.813	120	645	1541	2129	-2.184	278	1263	318	1811	0
5	11	12	"iYDR244W"	"iYDR244W"	4230	20800	110	553	520	293	85	94	59	81	76	0	2240	1802	1264	78	103	200	75	73	0	0.216	0.252	0.258	0.337	3.330	0.234	0.852	80	558	2630	2159	-2.208	468	2162	435	1724	0
5	12	12	"iYDR248C"	"iYDR248C"	4420	20790	110	666	666	407	86	110	114	76	75	0	2157	2189	1559	83	175	425	75	67	0	0.280	0.275	0.283	0.318	2.334	0.251	0.853	80	556	2654	2686	-1.838	580	2074	580	2106	0
5	13	12	"itG(GCC)D2"	"itG(GCC)D2"	4630	20800	100	676	639	371	90	109	103	78	72	0	1990	1696	1171	84	169	394	73	66	0	0.307	0.341	0.356	0.450	2.381	0.316	0.871	80	497	2492	2161	-1.702	586	1906	549	1612	0
5	14	12	"iYDR265W"	"iYDR265W"	4820	20790	100	1306	1135	622	88	101	77	96	91	0	2698	2215	1226	81	122	204	87	85	0	0.465	0.491	0.485	0.554	2.072	0.474	0.881	80	489	3835	3181	-1.103	1218	2617	1047	2134	0
5	15	12	"iYDR271C"	"iYDR271C"	5030	20780	110	2104	1721	1141	89	114	131	88	76	0	1781	1326	966	78	117	196	72	66	0	1.183	1.308	1.330	1.731	2.554	1.246	0.901	80	567	3718	2880	0.243	2015	1703	1632	1248	0
5	16	12	"iYDR286C"	"iYDR286C"	5220	20780	110	1332	1491	1054	88	116	140	86	77	0	4139	4164	3315	79	129	254	83	78	0	0.306	0.343	0.336	0.426	2.445	0.318	0.880	80	526	5304	5488	-1.706	1244	4060	1403	4085	0
5	17	12	"iYDR292C"	"iYDR292C"	5410	20770	110	374	380	204	90	103	78	78	70	0	1153	1041	721	80	135	262	73	67	0	0.265	0.302	0.302	0.370	2.146	0.280	0.836	80	580	1357	1251	-1.918	284	1073	290	961	0
5	18	12	"iYDR296W"	"iYDR296W"	5640	20770	120	515	710	541	95	104	52	87	80	0	1487	2489	2320	81	108	154	82	74	0	0.299	0.255	0.265	0.343	2.317	0.234	0.900	120	595	1826	3023	-1.743	420	1406	615	2408	0
5	19	12	"iYDR311W"	"iYDR311W"	5820	20770	120	530	602	418	91	100	48	89	80	0	1445	2231	2070	80	97	144	82	72	0	0.322	0.238	0.239	0.332	2.767	0.199	0.804	120	596	1804	2662	-1.637	439	1365	511	2151	0
5	20	12	"iYDR315C"	"iYDR315C"	6040	20760	110	1372	1188	712	91	110	90	87	83	0	2930	2370	1581	80	134	280	81	72	0	0.449	0.479	0.482	0.540	2.052	0.444	0.882	80	554	4131	3387	-1.154	1281	2850	1097	2290	0
5	21	12	"iYDR317W"	"iYDR317W"	6220	20750	110	1777	1891	1424	91	148	281	82	68	0	2675	2490	1992	80	176	451	78	62	0	0.650	0.747	0.761	0.802	1.742	0.735	0.898	80	558	4281	4210	-0.622	1686	2595	1800	2410	0
5	1	13	"itK(CUU)E1"	"itK(CUU)E1"	2280	21050	90	192	420	571	85	89	26	84	76	0	176	554	932	76	76	31	67	57	0	1.070	0.701	0.888	0.969	2.347	0.611	0.875	52	373	207	813	0.098	107	100	335	478	0
5	2	13	"iYELWdelta6"	"iYELWdelta6"	2450	21030	120	709	1105	907	86	92	45	91	84	0	639	976	827	75	78	50	84	80	0	1.105	1.131	1.091	1.142	1.998	1.114	0.935	120	572	1187	1920	0.144	623	564	1019	901	0
5	3	13	"iYEL007W"	"iYEL007W"	2650	21030	120	4877	5716	4179	85	96	116	99	94	0	2608	2859	2143	75	78	56	88	87	0	1.892	2.023	2.012	2.375	1.994	2.035	0.935	120	550	7325	8415	0.920	4792	2533	5631	2784	0
5	4	13	"isnR14"	"isnR14"	2830	21030	100	314	417	329	85	101	129	72	45	0	250	375	387	76	80	62	71	60	0	1.316	1.110	1.423	1.242	2.145	1.019	0.601	80	465	403	631	0.396	229	174	332	299	0
5	5	13	"iYER010C-1"	"iYER010C-1"	3040	21020	110	1459	1726	1378	86	122	234	77	65	0	2744	3607	3225	78	141	467	70	65	0	0.515	0.465	0.461	0.657	2.827	0.444	0.944	80	536	4039	5169	-0.957	1373	2666	1640	3529	0
5	6	13	"iYER012W"	"iYER012W"	3230	21010	120	640	903	714	93	145	236	68	55	0	845	1208	1026	82	177	470	56	45	0	0.717	0.719	0.714	0.770	1.795	0.683	0.914	120	579	1310	1936	-0.480	547	763	810	1126	0
5	7	13	"iYER027C"	"iYER027C"	3440	21010	120	1392	1473	994	92	120	131	89	82	0	2805	3181	2449	81	126	267	82	76	0	0.477	0.445	0.426	0.532	2.173	0.424	0.944	120	526	4024	4481	-1.067	1300	2724	1381	3100	0
5	8	13	"iYER031C"	"iYER031C"	3620	21010	110	1276	1293	935	87	127	196	77	70	0	2952	2889	2229	79	161	412	77	70	0	0.414	0.429	0.428	0.472	1.581	0.419	0.935	80	524	4062	4016	-1.273	1189	2873	1206	2810	0
5	9	13	"iYER035W"	"iYER035W"	3840	21010	120	1575	1699	1401	89	128	186	76	67	0	2190	2558	2210	79	145	321	75	67	0	0.704	0.649	0.660	0.766	2.140	0.640	0.945	120	646	3597	4089	-0.506	1486	2111	1610	2479	0
5	10	13	"iYERWdelta9"	"iYERWdelta9"	4040	21010	100	316	360	225	85	99	95	75	55	0	701	742	584	76	99	132	70	62	0	0.370	0.413	0.385	0.462	2.298	0.386	0.800	80	492	856	941	-1.436	231	625	275	666	0
5	11	13	"iYER050C"	"iYER050C"	4260	21000	100	406	493	411	87	96	45	81	78	0	650	760	792	78	94	97	78	67	0	0.558	0.595	0.639	0.684	2.294	0.523	0.874	80	513	891	1088	-0.842	319	572	406	682	0
5	12	13	"iYER053C-1"	"iYER053C-1"	4450	20990	110	2269	2385	1732	89	130	241	83	80	0	6341	5530	4296	81	190	637	76	71	0	0.348	0.421	0.414	0.582	2.521	0.406	0.906	80	548	8440	7745	-1.522	2180	6260	2296	5449	0
5	13	13	"iYFR048W"	"iYFR048W"	4640	20990	110	1088	996	676	91	132	239	71	60	0	2271	2068	1579	79	185	621	68	60	0	0.455	0.455	0.443	0.456	1.686	0.436	0.923	80	549	3189	2894	-1.137	997	2192	905	1989	0
5	14	13	"iYFR052W"	"iYFR052W"	4840	20980	110	366	343	187	88	104	71	72	65	0	1315	1055	766	80	123	204	70	61	0	0.225	0.262	0.272	0.304	2.083	0.233	0.867	80	557	1513	1230	-2.151	278	1235	255	975	0
5	15	13	"iYFR054C-0"	"iYFR054C-0"	5030	20980	110	762	794	579	91	127	189	66	58	0	2134	2561	2219	81	200	650	62	55	0	0.327	0.283	0.293	0.364	2.183	0.268	0.925	80	559	2724	3183	-1.613	671	2053	703	2480	0
5	16	13	"iYGL257C"	"iYGL257C"	5230	20970	110	3177	3351	2519	92	182	426	77	75	0	4058	3897	3214	81	273	833	67	58	0	0.776	0.854	0.862	1.099	2.072	0.813	0.934	80	580	7062	7075	-0.366	3085	3977	3259	3816	0
5	17	13	"iYGL256W-3"	"iYGL256W-3"	5440	20970	110	1001	894	525	92	152	351	71	62	0	2101	1667	1094	84	181	524	72	67	0	0.451	0.507	0.500	0.603	2.428	0.486	0.919	80	584	2926	2385	-1.150	909	2017	802	1583	0
5	18	13	"iYGL252C"	"iYGL252C"	5660	20980	120	1622	1682	1075	96	108	72	99	96	0	4866	4696	3259	82	104	135	98	95	0	0.319	0.344	0.342	0.381	1.663	0.327	0.941	120	601	6310	6200	-1.648	1526	4784	1586	4614	0
5	19	13	"iYGL233W"	"iYGL233W"	5830	20960	100	453	431	233	95	113	83	77	72	0	977	904	582	82	132	203	77	71	0	0.400	0.409	0.429	0.441	1.817	0.379	0.853	80	451	1253	1158	-1.322	358	895	336	822	0
5	20	13	"iYGL228W"	"iYGL228W"	6040	20960	110	1750	1600	1087	98	156	263	76	70	0	3779	3269	2368	85	224	640	70	68	0	0.447	0.472	0.480	0.585	2.243	0.451	0.923	80	574	5346	4686	-1.161	1652	3694	1502	3184	0
5	21	13	"itV(AAC)G3-0"	"itV(AAC)G3-0"	6250	20960	120	2080	1831	1131	92	154	292	85	73	0	4939	4140	2860	82	197	610	78	70	0	0.409	0.429	0.415	0.524	2.062	0.406	0.948	120	667	6845	5797	-1.289	1988	4857	1739	4058	0
5	1	14	"iYGL208W"	"iYGL208W"	2260	21240	120	475	551	353	83	89	36	89	84	0	2468	3156	2746	76	92	149	89	80	0	0.164	0.152	0.161	0.207	2.338	0.131	0.883	120	664	2784	3548	-2.609	392	2392	468	3080	0
5	2	14	"itH(GUG)G1"	"itH(GUG)G1"	2460	21240	110	718	693	382	86	93	50	88	86	0	1044	1032	680	74	97	163	80	73	0	0.652	0.634	0.618	0.708	1.756	0.581	0.895	80	528	1602	1565	-0.618	632	970	607	958	0
5	3	14	"itK(UUU)G1"	"itK(UUU)G1"	2660	21240	120	1038	1134	773	85	94	84	95	85	0	2711	3396	2726	75	83	115	95	90	0	0.362	0.316	0.335	0.377	1.987	0.288	0.923	120	597	3589	4370	-1.468	953	2636	1049	3321	0
5	4	14	"iYGR091W"	"iYGR091W"	2850	21220	110	272	296	165	85	91	44	83	70	0	1243	1233	961	76	95	152	81	66	0	0.160	0.182	0.185	0.223	2.424	0.169	0.800	80	540	1354	1368	-2.642	187	1167	211	1157	0
5	5	14	"iYGR095C"	"iYGR095C"	3050	21220	110	324	331	178	85	105	178	58	28	0	1318	1324	958	76	126	390	70	58	0	0.192	0.197	0.206	0.244	2.670	0.178	0.784	80	568	1481	1494	-2.378	239	1242	246	1248	0
5	6	14	"iYGR099W"	"iYGR099W"	3240	21220	110	453	461	281	89	98	46	86	76	0	1867	1860	1440	79	114	155	81	75	0	0.204	0.209	0.217	0.242	2.585	0.191	0.814	80	543	2152	2153	-2.296	364	1788	372	1781	0
5	7	14	"iYGR111W"	"iYGR111W"	3440	21220	120	897	1450	1233	86	102	95	91	85	0	1372	2460	2319	79	114	219	81	71	0	0.627	0.573	0.594	0.691	2.202	0.537	0.901	120	641	2104	3745	-0.673	811	1293	1364	2381	0
5	8	14	"iYGR117C"	"iYGR117C"	3660	21210	110	1011	1000	674	89	115	118	87	73	0	2974	2823	2115	79	145	302	77	72	0	0.318	0.332	0.342	0.400	2.451	0.315	0.896	80	545	3817	3655	-1.651	922	2895	911	2744	0
5	9	14	"itN(GUU)G"	"itN(GUU)G"	3830	21200	100	321	367	225	89	114	107	68	52	0	1639	1695	1311	80	169	321	70	62	0	0.149	0.172	0.174	0.212	2.847	0.169	0.757	80	477	1791	1893	-2.748	232	1559	278	1615	0
5	10	14	"iYGR133W"	"iYGR133W"	4070	21200	110	1423	1201	771	87	106	83	90	82	0	3156	2671	1816	78	136	240	81	76	0	0.434	0.430	0.426	0.516	2.872	0.407	0.910	80	572	4414	3707	-1.204	1336	3078	1114	2593	0
5	11	14	"iYGR138C"	"iYGR138C"	4260	21200	110	275	285	141	87	105	85	71	55	0	795	704	462	80	125	225	68	61	0	0.263	0.317	0.308	0.308	1.859	0.295	0.806	80	516	903	822	-1.927	188	715	198	624	0
5	12	14	"iYGR142W"	"iYGR142W"	4450	21200	120	430	529	362	85	100	132	71	54	0	1197	1483	1208	79	102	248	75	62	0	0.309	0.316	0.335	0.375	2.182	0.292	0.889	120	627	1463	1848	-1.696	345	1118	444	1404	0
5	13	14	"iYGR154C"	"iYGR154C"	4660	21190	110	921	879	565	87	99	70	87	80	0	5144	4903	3745	78	136	410	77	72	0	0.165	0.164	0.167	0.222	2.646	0.152	0.879	80	557	5900	5617	-2.603	834	5066	792	4825	0
5	14	14	"iYGR158C"	"iYGR158C"	4850	21190	110	333	401	263	88	104	80	75	61	0	1104	1475	1229	79	160	446	62	51	0	0.239	0.224	0.235	0.290	2.695	0.208	0.851	80	565	1270	1709	-2.065	245	1025	313	1396	0
5	15	14	"iYGRCdelta30"	"iYGRCdelta30"	5050	21180	110	527	523	321	93	120	121	75	63	0	1034	1196	893	84	159	309	73	65	0	0.457	0.387	0.387	0.448	2.419	0.361	0.809	80	600	1384	1542	-1.130	434	950	430	1112	0
5	16	14	"iYHR094C"	"iYHR094C"	5280	21180	100	686	750	472	92	114	96	82	76	0	2314	2367	1776	80	175	388	80	75	0	0.266	0.288	0.292	0.343	2.166	0.259	0.880	80	490	2828	2945	-1.911	594	2234	658	2287	0
5	17	14	"iYHR098C"	"iYHR098C"	5450	21180	120	826	1161	970	91	110	81	89	78	0	1535	2627	2368	82	147	321	78	65	0	0.506	0.420	0.420	0.472	2.186	0.395	0.889	120	618	2188	3615	-0.983	735	1453	1070	2545	0
5	18	14	"iYHR102W"	"iYHR102W"	5660	21170	100	860	887	545	92	112	93	86	80	0	2436	2131	1456	82	135	241	83	76	0	0.326	0.388	0.396	0.447	2.280	0.364	0.881	80	465	3122	2844	-1.616	768	2354	795	2049	0
5	19	14	"iYHR119W"	"iYHR119W"	5840	21170	110	795	782	481	92	116	96	86	76	0	1443	1527	1095	81	141	232	77	72	0	0.516	0.477	0.496	0.622	2.576	0.436	0.883	80	554	2065	2136	-0.954	703	1362	690	1446	0
5	20	14	"iYHR123W"	"iYHR123W"	6050	21160	100	456	493	278	90	110	128	80	58	0	1134	1154	815	81	142	593	57	43	0	0.348	0.376	0.372	0.437	2.272	0.163	0.421	80	513	1419	1476	-1.525	366	1053	403	1073	0
5	21	14	"iYHR127W"	"iYHR127W"	6240	21160	110	1079	1193	797	89	99	50	95	90	0	1743	1829	1344	81	115	502	73	61	0	0.596	0.632	0.668	0.790	2.407	0.613	0.848	80	559	2652	2852	-0.747	990	1662	1104	1748	0
5	1	15	"iYHR143W"	"iYHR143W"	2260	21440	120	402	472	338	83	86	27	89	83	0	1072	1638	1473	75	87	115	84	78	0	0.320	0.249	0.247	0.260	2.431	0.218	0.819	120	693	1316	1952	-1.644	319	997	389	1563	0
5	2	15	"iYHRCdelta11"	"iYHRCdelta11"	2500	21440	120	371	486	353	83	88	39	90	80	0	753	1427	1344	75	86	89	90	80	0	0.425	0.298	0.322	0.356	2.140	0.258	0.859	120	554	966	1755	-1.235	288	678	403	1352	0
5	3	15	"iYHR149C"	"iYHR149C"	2660	21440	120	451	655	488	85	88	28	97	93	0	913	1541	1409	75	81	75	89	85	0	0.437	0.389	0.383	0.471	2.275	0.344	0.868	120	508	1204	2036	-1.195	366	838	570	1466	0
5	4	15	"iYHR164C"	"iYHR164C"	2850	21430	110	1152	1096	707	86	102	85	88	83	0	1964	2073	1631	78	113	189	81	72	0	0.565	0.506	0.499	0.632	2.277	0.447	0.854	80	555	2952	3005	-0.823	1066	1886	1010	1995	0
5	5	15	"iYHR168W"	"iYHR168W"	3070	21430	110	681	1136	959	84	111	107	88	80	0	1031	1522	1299	78	124	210	80	71	0	0.626	0.729	0.726	0.812	2.387	0.729	0.853	80	574	1550	2496	-0.675	597	953	1052	1444	0
5	6	15	"iYHR173C"	"iYHR173C"	3260	21420	100	831	867	540	88	115	94	87	80	0	870	908	645	82	118	156	76	70	0	0.943	0.943	0.994	1.053	2.040	0.885	0.777	80	489	1531	1605	-0.085	743	788	779	826	0
5	7	15	"itT(AGU)J"	"itT(AGU)J"	3460	21410	110	1458	1600	1143	88	130	172	82	76	0	2564	2431	1776	82	139	256	83	76	0	0.552	0.644	0.679	0.705	2.594	0.621	0.813	80	532	3852	3861	-0.857	1370	2482	1512	2349	0
5	8	15	"iYJL197W"	"iYJL197W"	3650	21410	110	621	692	454	89	131	175	75	60	0	1899	1732	1268	79	213	975	61	46	0	0.292	0.365	0.376	0.429	2.600	0.142	0.327	80	575	2352	2256	-1.774	532	1820	603	1653	0
5	9	15	"iYJL192C"	"iYJL192C"	3870	21410	100	336	378	243	85	102	87	72	58	0	1239	1631	1345	79	125	212	82	71	0	0.216	0.189	0.215	0.205	2.690	0.160	0.743	80	532	1411	1845	-2.208	251	1160	293	1552	0
5	10	15	"iYJL173C"	"iYJL173C"	4070	21400	110	372	384	222	86	95	52	90	76	0	1729	1580	1218	78	103	139	81	78	0	0.173	0.198	0.202	0.245	2.613	0.181	0.756	80	560	1937	1800	-2.529	286	1651	298	1502	0
5	11	15	"iYJL168C"	"iYJL168C"	4260	21400	120	373	459	316	88	102	76	82	63	0	741	1036	858	81	105	152	80	70	0	0.432	0.388	0.388	0.430	2.416	0.359	0.804	120	627	945	1326	-1.212	285	660	371	955	0
5	12	15	"iYJL164C"	"iYJL164C"	4460	21400	120	996	1200	941	86	108	127	87	74	0	2173	2568	2153	80	113	218	80	72	0	0.435	0.448	0.456	0.629	3.337	0.423	0.857	120	616	3003	3602	-1.202	910	2093	1114	2488	0
5	13	15	"isnR128"	"isnR128"	4660	21390	100	317	333	176	88	105	112	71	51	0	779	758	527	79	109	212	70	62	0	0.327	0.361	0.379	0.433	2.456	0.312	0.749	80	498	929	924	-1.612	229	700	245	679	0
5	14	15	"iYJL146W"	"iYJL146W"	4860	21400	120	254	289	173	87	94	41	80	65	0	1027	1582	1357	78	99	199	82	75	0	0.176	0.134	0.130	0.152	2.516	0.118	0.801	120	604	1116	1706	-2.507	167	949	202	1504	0
5	15	15	"iYJL141C"	"iYJL141C"	5060	21390	100	593	536	308	88	101	66	85	78	0	1771	1790	1270	83	130	277	80	71	0	0.299	0.262	0.255	0.291	2.414	0.225	0.802	80	501	2193	2155	-1.741	505	1688	448	1707	0
5	16	15	"iYJL125C"	"iYJL125C"	5250	21380	90	229	236	81	89	107	73	82	46	0	486	483	220	82	153	311	71	17	0	0.347	0.367	0.356	0.375	1.830	0.351	0.622	52	414	544	548	-1.529	140	404	147	401	0
5	17	15	"iYJL120W"	"iYJL120W"	5450	21380	100	796	745	393	95	132	157	83	76	0	1916	1627	1010	83	176	399	75	67	0	0.382	0.421	0.418	0.454	2.008	0.392	0.892	80	502	2534	2194	-1.387	701	1833	650	1544	0
5	18	15	"iYJL115W"	"iYJL115W"	5650	21370	100	1412	1321	691	90	131	157	90	85	0	2121	1703	954	82	177	399	86	71	0	0.648	0.759	0.741	0.810	2.047	0.721	0.833	80	520	3361	2852	-0.625	1322	2039	1231	1621	0
5	19	15	"iYKL211C"	"iYKL211C"	5850	21360	110	963	930	534	89	113	111	92	83	0	4256	3590	2364	80	147	423	82	75	0	0.209	0.240	0.253	0.305	2.581	0.218	0.829	80	563	5050	4351	-2.256	874	4176	841	3510	0
5	20	15	"itT(CGU)K"	"itT(CGU)K"	6040	21370	100	617	604	355	93	122	139	81	70	0	4067	3595	2387	82	260	795	77	65	0	0.131	0.145	0.141	0.172	2.377	0.138	0.807	80	519	4509	4024	-2.927	524	3985	511	3513	0
5	21	15	"iYKL205W"	"iYKL205W"	6260	21360	100	1328	1224	662	90	126	186	88	81	0	2704	2457	1511	83	278	1085	70	58	0	0.472	0.478	0.481	0.571	2.186	0.435	0.831	80	506	3859	3508	-1.082	1238	2621	1134	2374	0
5	1	16	"iYKLCdelta2"	"iYKLCdelta2"	2280	21640	100	310	319	151	83	89	42	87	80	0	676	622	362	76	85	95	82	76	0	0.378	0.432	0.434	0.461	2.253	0.398	0.718	80	509	827	782	-1.402	227	600	236	546	0
5	2	16	"iYKL187C"	"iYKL187C"	2480	21630	130	498	574	356	84	92	48	94	86	0	1526	1824	1382	77	90	117	90	87	0	0.286	0.280	0.287	0.314	2.082	0.256	0.887	120	665	1863	2237	-1.807	414	1449	490	1747	0
5	3	16	"iYKL183W"	"iYKL183W"	2670	21630	110	389	451	295	85	91	45	90	82	0	1404	1729	1526	77	92	136	81	70	0	0.229	0.222	0.240	0.298	3.080	0.193	0.838	80	541	1631	2018	-2.126	304	1327	366	1652	0
5	4	16	"iYKL166C-1"	"iYKL166C-1"	2890	21630	120	1329	1753	1261	83	91	45	99	98	0	1850	2667	2088	75	89	116	95	90	0	0.702	0.644	0.634	0.722	2.011	0.615	0.904	120	598	3021	4262	-0.511	1246	1775	1670	2592	0
5	5	16	"iYKL164C-1"	"iYKL164C-1"	3070	21620	110	746	782	494	86	101	65	93	90	0	3032	2963	2129	78	112	197	91	81	0	0.223	0.241	0.249	0.298	2.238	0.224	0.871	80	496	3614	3581	-2.162	660	2954	696	2885	0
5	6	16	"iYKL162C"	"iYKL162C"	3260	21620	120	336	456	311	87	103	69	90	73	0	1409	2382	2118	81	137	318	82	70	0	0.188	0.160	0.153	0.196	2.397	0.137	0.774	120	624	1577	2670	-2.415	249	1328	369	2301	0
5	7	16	"iYKL148C"	"iYKL148C"	3460	21610	110	616	676	374	87	107	100	95	82	0	1545	1561	1001	80	144	331	81	72	0	0.361	0.398	0.399	0.452	1.885	0.363	0.880	80	573	1994	2070	-1.470	529	1465	589	1481	0
5	8	16	"iYKL143W"	"iYKL143W"	3670	21610	110	838	932	608	88	114	135	87	77	0	2599	2499	1892	79	210	1016	65	56	0	0.298	0.349	0.366	0.500	2.940	0.322	0.909	80	569	3270	3264	-1.748	750	2520	844	2420	0
5	9	16	"iYKL139W"	"iYKL139W"	3850	21610	110	2453	2258	1506	86	120	179	87	82	0	5015	4154	2942	78	166	464	80	75	0	0.479	0.533	0.543	0.684	2.653	0.511	0.915	80	475	7304	6248	-1.061	2367	4937	2172	4076	0
5	10	16	"iYLL025W"	"iYLL025W"	3990	21610	110	2269	2100	1404	85	123	235	85	77	0	1695	1456	1021	79	123	267	75	71	0	1.351	1.463	1.520	1.621	1.858	1.409	0.886	80	487	3800	3392	0.435	2184	1616	2015	1377	0
5	11	16	"iYLL021W"	"iYLL021W"	4180	21610	100	1645	1558	965	87	114	204	86	77	0	1339	1160	758	79	100	164	80	75	0	1.237	1.361	1.340	1.407	2.031	1.345	0.912	80	509	2818	2552	0.306	1558	1260	1471	1081	0
5	12	16	"iYLL017W"	"iYLL017W"	4380	21610	110	1600	1533	847	90	102	89	90	90	0	1934	1822	1163	79	89	106	86	85	0	0.814	0.828	0.811	0.973	1.937	0.789	0.931	80	570	3365	3186	-0.297	1510	1855	1443	1743	0
5	13	16	"iYLL001W"	"iYLL001W"	4580	21600	110	4827	5531	3764	87	116	261	95	90	0	1822	2058	1534	78	96	176	85	75	0	2.718	2.749	2.727	3.437	2.023	2.635	0.938	80	564	6484	7424	1.442	4740	1744	5444	1980	0
5	14	16	"iYLR003C"	"iYLR003C"	4770	21590	110	2999	2443	1490	87	126	282	82	77	0	1160	958	619	77	106	234	73	68	0	2.689	2.674	2.666	2.849	1.720	2.551	0.762	80	530	3995	3237	1.427	2912	1083	2356	881	0
5	15	16	"iYLR007W"	"iYLR007W"	4960	21580	130	2073	2462	1968	88	117	154	85	77	0	1079	1318	1112	78	102	194	72	62	0	1.983	1.915	1.957	2.412	2.508	1.851	0.875	120	630	2986	3614	0.988	1985	1001	2374	1240	0
5	16	16	"iYLR024C"	"iYLR024C"	5170	21580	120	884	1095	810	88	106	113	86	73	0	3353	4147	3497	80	107	159	85	80	0	0.243	0.248	0.258	0.343	2.400	0.233	0.945	120	646	4069	5074	-2.040	796	3273	1007	4067	0
5	17	16	"iYLR028C"	"iYLR028C"	5390	21580	120	621	601	357	92	96	34	93	90	0	1440	1427	1016	81	96	180	82	76	0	0.389	0.378	0.397	0.437	1.916	0.345	0.906	120	614	1888	1855	-1.361	529	1359	509	1346	0
5	18	16	"iYLR032W"	"iYLR032W"	5560	21570	100	574	562	292	95	111	81	91	77	0	2661	2442	1605	83	146	315	86	78	0	0.186	0.198	0.207	0.255	2.342	0.183	0.901	80	487	3057	2826	-2.428	479	2578	467	2359	0
5	19	16	"iYLR044C"	"iYLR044C"	5790	21580	120	1599	1514	874	87	99	65	97	95	0	5294	5409	3690	79	118	255	96	92	0	0.290	0.268	0.269	0.299	1.706	0.247	0.940	120	654	6727	6757	-1.786	1512	5215	1427	5330	0
5	20	16	"iYLR048W"	"iYLR048W"	5980	21560	100	467	511	353	89	95	48	91	90	0	1673	1596	1082	78	102	245	82	76	0	0.237	0.278	0.268	0.326	2.101	0.259	0.771	80	478	1973	1940	-2.077	378	1595	422	1518	0
5	21	16	"iYLR052W"	"iYLR052W"	6170	21550	110	685	636	319	90	113	110	88	75	0	1899	1589	1059	82	201	847	62	51	0	0.327	0.362	0.361	0.451	1.990	0.164	0.433	80	599	2412	2053	-1.611	595	1817	546	1507	0
5	1	17	"iYLR364W"	"iYLR364W"	2180	21840	120	2014	2485	1912	83	89	52	96	94	0	1697	2849	2565	76	80	71	90	89	0	1.191	0.866	0.855	1.100	2.299	0.791	0.892	120	538	3552	5175	0.252	1931	1621	2402	2773	0
5	2	17	"iYLR369W"	"iYLR369W"	2390	21840	110	640	620	390	86	98	77	87	75	0	3532	2876	1914	76	93	168	88	85	0	0.160	0.191	0.197	0.208	1.918	0.190	0.866	80	557	4010	3334	-2.641	554	3456	534	2800	0
5	3	17	"iYLR373C"	"iYLR373C"	2590	21840	100	228	244	114	82	89	42	86	71	0	904	1022	689	77	83	114	93	85	0	0.177	0.171	0.169	0.180	1.963	0.146	0.735	80	507	973	1107	-2.502	146	827	162	945	0
5	4	17	"iYLR389C"	"iYLR389C"	2800	21820	110	1878	2048	1459	83	103	131	91	88	0	2233	3581	2995	76	108	243	86	78	0	0.832	0.561	0.543	0.684	2.287	0.518	0.875	80	548	3952	5470	-0.265	1795	2157	1965	3505	0
5	5	17	"iYLR394W"	"iYLR394W"	2980	21820	130	1475	1555	1097	85	119	205	85	77	0	3149	3407	2632	78	145	453	77	71	0	0.453	0.442	0.453	0.515	2.113	0.412	0.896	120	643	4461	4799	-1.144	1390	3071	1470	3329	0
5	6	17	"iYLR398C"	"iYLR398C"	3190	21820	110	335	399	234	89	119	187	57	40	0	1566	1947	1465	82	169	488	77	60	0	0.166	0.166	0.172	0.193	2.099	0.149	0.821	80	565	1730	2175	-2.593	246	1484	310	1865	0
5	7	17	"iYLR412W-1"	"iYLR412W-1"	3390	21810	110	341	435	263	88	104	71	85	76	0	2391	2655	2025	83	174	416	83	68	0	0.110	0.135	0.146	0.175	2.805	0.132	0.852	80	574	2561	2919	-3.189	253	2308	347	2572	0
5	8	17	"iYLR417W"	"iYLR417W"	3590	21810	110	421	397	176	87	96	51	88	81	0	2642	2564	1564	79	144	310	87	83	0	0.130	0.125	0.122	0.151	2.767	0.113	0.823	80	594	2897	2795	-2.940	334	2563	310	2485	0
5	9	17	"iYLRCdelta24"	"iYLRCdelta24"	3800	21810	100	1441	1363	767	86	108	132	92	87	0	2433	2461	1478	78	166	819	78	62	0	0.575	0.536	0.535	0.561	1.598	0.355	0.583	80	510	3710	3660	-0.797	1355	2355	1277	2383	0
5	10	17	"iYLR436C"	"iYLR436C"	4010	21810	120	1273	1699	1417	84	120	215	82	75	0	700	937	757	77	126	282	72	52	0	1.909	1.878	1.831	1.844	1.808	1.952	0.835	120	638	1812	2475	0.932	1189	623	1615	860	0
5	11	17	"iYLR439W"	"iYLR439W"	4200	21810	110	1906	1678	1091	85	122	200	83	78	0	1249	1139	782	77	112	197	76	70	0	1.554	1.500	1.526	1.548	1.748	1.433	0.862	80	533	2993	2655	0.636	1821	1172	1593	1062	0
5	12	17	"iYLR444C"	"iYLR444C"	4400	21800	110	643	705	407	89	129	198	81	62	0	1133	1279	819	78	136	259	87	75	0	0.525	0.513	0.486	0.489	1.907	0.478	0.816	80	562	1609	1817	-0.929	554	1055	616	1201	0
5	13	17	"iYMR130W"	"iYMR130W"	4600	21790	110	937	1004	696	89	120	223	76	61	0	956	1058	764	79	122	216	77	66	0	0.967	0.935	0.931	0.946	2.374	0.921	0.851	80	559	1725	1894	-0.049	848	877	915	979	0
5	14	17	"iYMR134W"	"iYMR134W"	4800	21790	110	527	532	333	90	113	115	76	62	0	1675	1592	1193	80	111	144	82	72	0	0.274	0.292	0.298	0.322	2.513	0.267	0.835	80	570	2032	1954	-1.868	437	1595	442	1512	0
5	15	17	"iYMR138W"	"iYMR138W"	5010	21790	120	742	718	432	90	105	100	87	77	0	2773	3169	2222	79	108	205	93	89	0	0.242	0.203	0.203	0.214	2.047	0.190	0.884	120	629	3346	3718	-2.047	652	2694	628	3090	0
5	16	17	"iYMR155W"	"iYMR155W"	5200	21780	110	644	721	478	90	99	52	82	81	0	1371	1332	998	81	108	217	72	67	0	0.429	0.504	0.497	0.617	2.591	0.477	0.846	80	533	1844	1882	-1.219	554	1290	631	1251	0
5	17	17	"itM(CAU)M"	"itM(CAU)M"	5400	21780	100	230	240	106	93	101	50	75	63	0	542	533	336	87	118	205	66	55	0	0.301	0.330	0.342	0.358	2.419	0.196	0.455	80	490	592	593	-1.732	137	455	147	446	0
5	18	17	"iYMR161W"	"iYMR161W"	5610	21780	120	1375	1524	1040	99	110	57	96	90	0	1912	2161	1560	90	130	246	82	76	0	0.700	0.688	0.749	0.795	1.985	0.658	0.877	120	638	3098	3496	-0.514	1276	1822	1425	2071	0
5	19	17	"iYMR176W"	"iYMR176W"	5810	21770	120	1245	1620	1210	89	93	29	99	96	0	3243	3249	2528	82	87	79	93	90	0	0.366	0.483	0.496	0.567	2.158	0.467	0.931	120	576	4317	4698	-1.451	1156	3161	1531	3167	0
5	20	17	"iYMR180C"	"iYMR180C"	6000	21760	110	627	652	419	90	100	57	88	75	0	1288	1349	963	82	106	164	80	73	0	0.445	0.444	0.467	0.494	2.015	0.416	0.841	80	550	1743	1829	-1.167	537	1206	562	1267	0
5	21	17	"iYMR183C"	"iYMR183C"	6210	21760	110	539	564	366	90	110	101	77	66	0	2176	2215	1586	84	155	376	76	70	0	0.215	0.222	0.236	0.251	2.110	0.216	0.876	80	611	2541	2605	-2.220	449	2092	474	2131	0
5	1	18	"iYMR198W"	"iYMR198W"	2230	22050	140	1114	1602	1328	85	88	46	98	94	0	3607	5698	5119	73	74	57	96	94	0	0.291	0.270	0.285	0.338	2.089	0.252	0.910	156	717	4563	7142	-1.780	1029	3534	1517	5625	0
5	2	18	"iYMR202W"	"iYMR202W"	2430	22040	140	828	1349	1202	85	90	57	91	84	0	684	1267	1235	74	85	148	77	69	0	1.218	1.060	1.025	1.125	2.567	0.998	0.900	156	675	1353	2457	0.285	743	610	1264	1193	0
5	3	18	"iYMR206W"	"iYMR206W"	2620	22030	130	1306	1974	1600	84	99	170	89	80	0	2405	3389	2942	75	99	345	80	75	0	0.524	0.570	0.571	0.709	2.246	0.540	0.910	120	662	3552	5204	-0.931	1222	2330	1890	3314	0
5	4	18	"iYNL148C"	"iYNL148C"	2850	22030	110	468	441	248	83	96	95	77	68	0	1606	1703	1224	74	115	375	75	70	0	0.251	0.220	0.221	0.258	2.184	0.173	0.757	80	553	1917	1987	-1.992	385	1532	358	1629	0
5	5	18	"iYNL144C-0"	"iYNL144C-0"	3020	22020	110	3766	4573	3296	86	184	519	81	77	0	4503	4107	3126	77	210	694	73	65	0	0.831	1.113	1.112	1.349	2.459	1.090	0.903	80	491	8106	8517	-0.266	3680	4426	4487	4030	0
5	6	18	"iYNL141W"	"iYNL141W"	3200	22020	110	1084	1414	1063	87	192	496	72	50	0	2062	2706	2147	79	199	508	73	68	0	0.503	0.505	0.494	0.542	2.005	0.524	0.855	80	551	2980	3954	-0.992	997	1983	1327	2627	0
5	7	18	"iYNL125C"	"iYNL125C"	3410	22010	110	729	845	610	89	143	215	71	58	0	2111	2617	2126	81	221	567	71	61	0	0.315	0.298	0.313	0.347	2.697	0.275	0.886	80	598	2670	3292	-1.665	640	2030	756	2536	0
5	8	18	"iYNL121C"	"iYNL121C"	3630	22010	110	346	412	239	88	117	149	65	45	0	1666	2209	1584	79	195	527	81	62	0	0.163	0.152	0.155	0.170	2.140	0.141	0.830	80	560	1845	2454	-2.621	258	1587	324	2130	0
5	9	18	"iYNL116W"	"iYNL116W"	3830	22010	120	818	1556	1677	85	104	116	86	76	0	525	1285	1441	77	155	741	39	27	0	1.636	1.218	1.224	1.452	2.325	1.206	0.895	120	637	1181	2679	0.710	733	448	1471	1208	0
5	10	18	"iYNL097C"	"iYNL097C"	4040	22010	110	479	558	351	84	91	41	92	87	0	2389	2791	2190	76	86	137	90	85	0	0.171	0.175	0.167	0.215	2.469	0.153	0.854	80	534	2708	3189	-2.550	395	2313	474	2715	0
5	11	18	"iYNL094W"	"iYNL094W"	4230	22000	110	666	771	474	89	116	154	86	68	0	3236	3651	2545	77	144	373	90	83	0	0.183	0.191	0.189	0.214	2.103	0.176	0.876	80	556	3736	4256	-2.453	577	3159	682	3574	0
5	12	18	"iYNL089C"	"iYNL089C"	4440	22000	100	527	526	316	88	103	77	80	71	0	1829	2313	1813	79	144	347	73	67	0	0.251	0.196	0.191	0.245	2.887	0.170	0.817	80	499	2189	2672	-1.995	439	1750	438	2234	0
5	13	18	"iYNL073W"	"iYNL073W"	4620	21990	110	473	616	458	88	120	151	66	57	0	844	1137	955	80	158	343	63	53	0	0.504	0.500	0.502	0.584	2.481	0.461	0.853	80	542	1149	1585	-0.989	385	764	528	1057	0
5	14	18	"iYNL069C"	"iYNL069C"	4830	21990	110	776	803	504	89	127	160	82	71	0	3053	3090	2272	82	203	493	82	68	0	0.231	0.237	0.249	0.259	1.940	0.209	0.852	80	577	3658	3722	-2.113	687	2971	714	3008	0
5	15	18	"iYNL065W"	"iYNL065W"	5040	21980	110	740	831	534	95	120	119	87	75	0	2357	2575	1881	83	210	519	82	66	0	0.284	0.295	0.303	0.339	2.033	0.270	0.871	80	552	2919	3228	-1.818	645	2274	736	2492	0
5	16	18	"itG(GCC)O2"	"itG(GCC)O2"	5240	21980	110	514	556	364	95	120	105	73	62	0	1571	1478	1116	85	174	388	66	61	0	0.282	0.331	0.329	0.388	2.720	0.314	0.854	80	558	1905	1854	-1.826	419	1486	461	1393	0
5	17	18	"iYOL019W"	"iYOL019W"	5440	21970	110	1910	1946	1338	110	163	203	87	75	0	2265	2819	2174	99	195	354	86	72	0	0.831	0.675	0.665	0.729	1.939	0.615	0.879	80	570	3966	4556	-0.267	1800	2166	1836	2720	0
5	18	18	"iYOL015W"	"iYOL015W"	5640	21970	110	1723	1780	1119	116	188	269	91	83	0	2232	2417	1718	101	209	397	90	76	0	0.754	0.718	0.763	0.807	1.786	0.675	0.850	80	551	3738	3980	-0.407	1607	2131	1664	2316	0
5	19	18	"iYOL001W"	"iYOL001W"	5850	21970	110	1916	2326	1574	92	114	166	93	90	0	848	878	627	86	111	228	70	63	0	2.394	2.821	2.849	3.343	2.194	2.878	0.829	80	524	2586	3026	1.259	1824	762	2234	792	0
5	20	18	"iYOR003W"	"iYOR003W"	6030	21970	120	4908	8125	6985	90	126	398	96	92	0	1123	1872	1658	81	97	150	89	74	0	4.624	4.486	4.445	5.144	1.954	4.563	0.876	120	610	5860	9826	2.209	4818	1042	8035	1791	0
5	21	18	"iYOR007C"	"iYOR007C"	6230	21960	110	3363	3622	2697	90	192	593	78	70	0	1822	1917	1490	83	152	363	72	61	0	1.882	1.926	1.941	2.151	2.007	1.944	0.888	80	567	5012	5366	0.912	3273	1739	3532	1834	0
5	1	19	"iYOR018W"	"iYOR018W"	2250	22240	130	1594	2365	1965	82	90	78	97	95	0	1203	2320	2086	74	79	82	93	90	0	1.339	1.016	1.018	1.179	2.172	0.975	0.892	120	666	2641	4529	0.421	1512	1129	2283	2246	0
5	2	19	"iYOR021C"	"iYOR021C"	2450	22240	110	385	495	337	83	94	91	77	66	0	1248	1626	1356	75	86	118	87	75	0	0.257	0.266	0.290	0.327	2.332	0.242	0.835	80	486	1475	1963	-1.958	302	1173	412	1551	0
5	3	19	"iYOR026W"	"iYOR026W"	2640	22240	120	260	402	311	83	98	176	50	38	0	518	1073	1100	77	110	380	53	38	0	0.401	0.320	0.342	0.382	2.501	0.269	0.788	120	588	618	1315	-1.317	177	441	319	996	0
5	4	19	"iYOR042W"	"iYOR042W"	2830	22220	110	688	791	564	84	105	95	81	71	0	1057	1131	899	77	125	365	66	53	0	0.616	0.671	0.680	0.712	2.384	0.613	0.838	80	546	1584	1761	-0.698	604	980	707	1054	0
5	5	19	"iYOR045W"	"iYOR045W"	3060	22220	120	842	1524	1356	88	148	360	74	50	0	715	1193	1090	77	133	306	59	50	0	1.182	1.287	1.346	1.539	2.433	1.297	0.834	120	651	1392	2552	0.241	754	638	1436	1116	0
[truncated: 2,252,182 more chars]
