# Supplementary material for: Genome-Wide Mapping of the Cohesin Complex in the Yeast Saccharomyces cerevisiae
Source: PLoS Biol. 2004 Jul 27;2(9):e259. doi: 10.1371/journal.pbio.0020259 (PMC490026; doi:10.1371/journal.pbio.0020259)
Supplement: Dataset S36 — Cy3 = genomic DNA; Cy5 = ChIP 12h Rec8-3HA in SK1. (5.6 MB XLS). [file pbio.0020259.sd036.xls]

## Sheet: UP3_89.gpr
ATF	1
27	43
Type=GenePix Results 1.4
DateTime=2001/04/04 10:13:01
Settings=C:\Documents and Settings\jen\My Documents\cohesins, meiosis\UP3_089.gps
GalFile=C:\Documents and Settings\jen\My Documents\cohesinArrayData2\UberPrint3_v2.gal
Scanner=GenePix 4000A [46495]
Comment=Cy5=12 hr tp Rec8 meiosis SK1 HongGuo Cy3=total genomic
PixelSize=10
ImageName=635 nm 532 nm
FileName=C:\Documents and Settings\jen\My Documents\cohesins, meiosis\UP3_089_635_nm.tif C:\Documents and Settings\jen\My Documents\cohesins, meiosis\UP3_089_532_nm.tif
PMTVolts=660 660
ScanPower=100 100
FocusPosition=0
NormalizationFactor:RatioOfMedians=2.14528
NormalizationFactor:RatioOfMeans=2.10572
NormalizationFactor:MedianOfRatios=2.11466
NormalizationFactor:MeanOfRatios=1.97054
NormalizationFactor:RegressionRatio=2.18074
JpegImage=C:\Documents and Settings\jen\My Documents\cohesins, meiosis\UP3_089.jpg
RatioFormulation=W1/W2 (635 nm/532 nm)
Barcode=
ImageOrigin=1240, 12560
JpegOrigin=2080, 13590
Creator=GenePix Pro 3.0.6.55
Temperature=38.52
LaserPower=1.73 1.87
LaserOnTime=4174 4176
Supplier=
Block	Column	Row	Name	ID	X	Y	Dia.	F635 Median	F635 Mean	F635 SD	B635 Median	B635 Mean	B635 SD	% > B635+1SD	% > B635+2SD	F635 % Sat.	F532 Median	F532 Mean	F532 SD	B532 Median	B532 Mean	B532 SD	% > B532+1SD	% > B532+2SD	F532 % Sat.	Ratio of Medians	Ratio of Means	Median of Ratios	Mean of Ratios	Ratios SD	Rgn Ratio	Rgn Rｲ	F Pixels	B Pixels	Sum of Medians	Sum of Means	Log Ratio	F635 Median - B635	F532 Median - B532	F635 Mean - B635	F532 Mean - B532	Flags
1	1	1	YBL081W	YBL081W	2320	14060	100	2423	2371	702	45	46	11	100	100	0	6643	6431	2242	60	59	33	100	100	0	0.361	0.365	0.349	0.379	1.337	0.35	0.935	80	375	8961	8697	-1.469	2378	6583	2326	6371	0
1	2	1	YBL112C	YBL112C	2510	14050	120	9420	8317	5343	45	46	10	99	95	0	11336	11031	7265	60	56	18	95	95	0	0.831	0.754	0.738	0.748	1.661	0.74	0.944	120	694	20651	19243	-0.266	9375	11276	8272	10971	0
1	3	1	CDS1	YBR029C	2740	14050	110	494	479	190	46	46	10	100	100	0	1158	1146	462	57	56	18	100	100	0	0.407	0.398	0.4	0.398	1.579	0.385	0.889	80	562	1549	1522	-1.297	448	1101	433	1089	0
1	4	1	YBL083C	YBL083C	2920	14050	100	286	307	139	44	47	43	100	93	0	778	794	383	57	55	21	97	96	0	0.336	0.357	0.358	0.383	1.829	0.338	0.869	80	486	963	1000	-1.575	242	721	263	737	0
1	5	1	NTH2	YBR001C	3120	14040	120	1405	1240	813	44	51	87	86	84	0	973	905	608	55	61	122	83	75	0	1.483	1.407	1.352	1.375	2.076	1.269	0.777	120	624	2279	2046	0.568	1361	918	1196	850	0
1	6	1	RPL4A	YBR031W	3300	14030	120	1370	1176	705	45	46	11	90	89	0	2595	2206	1351	57	55	23	90	89	0	0.522	0.526	0.518	0.517	1.853	0.515	0.925	120	643	3863	3280	-0.938	1325	2538	1131	2149	0
1	7	1	BOI1	YBL085W	3510	14040	100	182	194	74	44	46	12	100	98	0	298	305	128	59	56	17	98	98	0	0.577	0.61	0.589	0.614	1.713	0.562	0.824	80	528	377	396	-0.792	138	239	150	246	0
1	8	1	COQ1	YBR003W	3740	14020	130	7835	6584	3243	45	47	13	100	100	0	9685	8112	4129	58	56	18	100	100	0	0.809	0.812	0.806	0.827	2.034	0.797	0.924	120	742	17417	14593	-0.305	7790	9627	6539	8054	0
1	9	1	YBR033W	YBR033W	3930	14030	120	6088	5806	2234	46	48	11	100	100	0	8498	8047	3190	58	56	17	100	100	0	0.716	0.721	0.71	0.721	1.758	0.705	0.905	120	639	14482	13749	-0.482	6042	8440	5760	7989	0
1	10	1	RPL23A	YBL087C	4140	14010	120	2967	2642	1145	46	47	11	100	99	0	11497	9845	4024	59	58	42	100	100	0	0.255	0.265	0.264	0.262	1.781	0.26	0.924	120	616	14359	12382	-1.969	2921	11438	2596	9786	0
1	11	1	YBR005W	YBR005W	4320	14020	120	4175	3640	1642	46	49	25	100	100	0	5884	5101	2278	59	57	18	100	100	0	0.709	0.713	0.718	0.716	1.66	0.705	0.925	120	635	9954	8636	-0.496	4129	5825	3594	5042	0
1	12	1	PDX3	YBR035C	4540	14020	120	4423	3825	1608	46	47	10	100	100	0	8093	6689	3182	59	57	17	100	99	0	0.545	0.57	0.557	0.663	2.058	0.539	0.892	120	643	12411	10409	-0.876	4377	8034	3779	6630	0
1	13	1	YCL045C	YCL045C	4720	14010	110	248	530	589	46	47	11	100	96	0	326	909	1125	59	57	19	100	98	0	0.757	0.569	0.568	0.606	1.683	0.493	0.856	80	547	469	1334	-0.402	202	267	484	850	0
1	14	1	YCLX04W	YCLX04W	4950	14020	130	6199	5465	2144	47	51	27	100	100	0	7019	6000	2472	60	60	25	100	100	0	0.884	0.912	0.915	0.943	1.371	0.897	0.92	120	763	13111	11358	-0.178	6152	6959	5418	5940	0
1	15	1	YCR023C	YCR023C	5140	14010	110	2422	2461	1098	48	52	23	100	100	0	3797	3728	1743	61	89	615	91	86	0	0.635	0.658	0.649	0.712	1.6	0.621	0.924	80	556	6110	6080	-0.654	2374	3736	2413	3667	0
1	16	1	YCL047C	YCL047C	5350	14000	100	481	729	676	47	49	12	93	93	0	1182	1852	1930	61	59	21	92	88	0	0.387	0.381	0.459	0.499	2.485	0.347	0.89	80	491	1555	2473	-1.369	434	1121	682	1791	0
1	17	1	YCLX06C	YCLX06C	5540	14010	120	3668	3136	1643	47	49	11	99	97	0	9455	8121	4400	60	58	18	100	100	0	0.385	0.383	0.379	0.35	1.843	0.371	0.937	120	624	13016	11150	-1.376	3621	9395	3089	8061	0
1	18	1	PMP1	YCR024C-A	5740	14000	120	1252	1120	459	46	48	10	100	99	0	3811	3180	1363	60	64	125	98	97	0	0.322	0.344	0.34	0.341	1.735	0.331	0.924	120	675	4957	4194	-1.637	1206	3751	1074	3120	0
1	19	1	YCL049C	YCL049C	5940	13990	90	426	789	787	47	49	13	100	100	0	824	1726	1936	62	63	27	100	100	0	0.497	0.446	0.468	0.476	2.422	0.346	0.68	52	388	1141	2406	-1.008	379	762	742	1664	0
1	20	1	YCLX08C	YCLX08C	6140	14000	130	2524	2262	900	47	49	12	100	100	0	6061	5353	2157	62	61	22	100	100	0	0.413	0.419	0.418	0.417	1.396	0.406	0.931	120	760	8476	7506	-1.276	2477	5999	2215	5291	0
1	21	1	YCR026C	YCR026C	6340	13990	110	1519	1452	523	48	51	18	100	100	0	3562	3318	1235	62	65	50	100	100	0	0.42	0.431	0.433	0.441	1.347	0.406	0.871	80	586	4971	4660	-1.251	1471	3500	1404	3256	0
1	1	2	LRE1	YCL051W	2340	14250	100	213	215	78	44	46	11	100	98	0	440	447	183	58	57	31	98	97	0	0.442	0.44	0.433	0.442	1.508	0.406	0.851	80	441	551	560	-1.177	169	382	171	389	0
1	2	2	YCLX10C	YCLX10C	2550	14240	110	7302	6760	2060	45	47	11	100	100	0	5747	5241	1554	58	56	18	100	100	0	1.276	1.296	1.282	1.312	1.327	1.319	0.925	80	555	12946	11898	0.351	7257	5689	6715	5183	0
1	3	2	FEN2	YCR028C	2740	14230	110	7594	6740	2392	46	47	12	100	100	0	13074	11146	3946	58	56	19	100	100	0	0.58	0.604	0.621	0.617	1.529	0.596	0.914	80	565	20564	17782	-0.786	7548	13016	6694	11088	0
1	4	2	SHR3	YDL212W	2960	14240	100	547	641	374	45	46	11	100	100	0	1968	2274	1360	57	56	20	100	100	0	0.263	0.269	0.269	0.266	1.858	0.246	0.815	80	517	2413	2813	-1.929	502	1911	596	2217	0
1	5	2	THI13	YDL244W	3160	14230	110	3292	3096	1571	45	47	14	100	100	0	7012	6730	3325	58	57	25	100	100	0	0.467	0.457	0.447	0.456	1.705	0.453	0.915	80	557	10201	9723	-1.099	3247	6954	3051	6672	0
1	6	2	REG1	YDR028C	3360	14230	100	304	297	97	45	47	11	98	98	0	1257	1219	396	59	56	18	100	100	0	0.216	0.217	0.213	0.216	1.817	0.208	0.868	80	506	1457	1412	-2.21	259	1198	252	1160	0
1	7	2	YDL214C	YDL214C	3550	14230	100	444	433	197	45	46	11	98	98	0	1058	1103	549	58	58	36	100	100	0	0.399	0.371	0.37	0.362	1.934	0.336	0.779	80	509	1399	1433	-1.326	399	1000	388	1045	0
1	8	2	YDL246C	YDL246C	3780	14210	90	114	123	50	46	48	13	94	84	0	180	203	120	59	57	17	86	84	0	0.562	0.535	0.487	0.561	2.639	0.454	0.686	52	405	189	221	-0.831	68	121	77	144	0
1	9	2	RAD28	YDR030C	3970	14230	110	505	682	456	47	48	11	100	100	0	1455	1827	1245	59	58	45	98	96	0	0.328	0.359	0.34	0.38	1.836	0.346	0.885	80	535	1854	2403	-1.608	458	1396	635	1768	0
1	10	2	YDL216C	YDL216C	4150	14220	110	817	872	428	46	48	13	100	100	0	2812	2963	1576	59	59	45	98	98	0	0.28	0.284	0.29	0.306	1.677	0.27	0.886	80	554	3524	3730	-1.836	771	2753	826	2904	0
1	11	2	COS7	YDL248W	4360	14220	110	1437	1453	683	46	48	15	100	100	0	2306	2223	1110	59	58	29	100	98	0	0.619	0.65	0.636	0.687	1.765	0.627	0.885	80	575	3638	3571	-0.692	1391	2247	1407	2164	0
1	12	2	YDR032C	YDR032C	4570	14210	110	1275	1189	586	46	50	22	100	98	0	4737	4066	2089	59	65	56	96	95	0	0.263	0.285	0.276	0.318	2.384	0.272	0.885	80	547	5907	5150	-1.928	1229	4678	1143	4007	0
1	13	2	YDL218W	YDL218W	4770	14220	120	3759	3431	2037	46	48	12	100	99	0	6315	5725	3600	59	57	21	100	100	0	0.594	0.597	0.575	0.61	2.079	0.571	0.9	120	630	9969	9051	-0.753	3713	6256	3385	5666	0
1	14	2	YRB1	YDR002W	4970	14220	120	2577	2290	954	46	49	14	100	99	0	4871	3996	2068	59	57	18	98	97	0	0.526	0.57	0.547	0.722	2.269	0.525	0.896	120	594	7343	6181	-0.927	2531	4812	2244	3937	0
1	15	2	LYS14	YDR034C	5170	14200	110	4406	4283	2214	49	55	33	100	100	0	5364	5240	2838	60	63	33	98	96	0	0.821	0.817	0.854	0.859	2.14	0.811	0.851	80	556	9661	9414	-0.284	4357	5304	4234	5180	0
1	16	2	MRP1	YDR347W	5370	14210	110	4170	3541	1524	48	66	169	98	96	0	8226	6893	3534	61	100	377	96	93	0	0.505	0.511	0.496	0.578	2.136	0.459	0.894	80	574	12287	10325	-0.986	4122	8165	3493	6832	0
1	17	2	RGA2	YDR379W	5570	14210	120	4789	4409	2369	48	65	164	98	98	0	10068	9014	5422	61	97	367	96	95	0	0.474	0.487	0.484	0.529	2	0.444	0.849	120	604	14748	13314	-1.078	4741	10007	4361	8953	0
1	18	2	YDR411C	YDR411C	5760	14210	110	3536	3268	1443	48	48	11	100	100	0	12913	11113	4992	58	58	19	100	100	0	0.271	0.291	0.287	0.293	1.721	0.276	0.887	80	548	16343	14275	-1.882	3488	12855	3220	11055	0
1	19	2	YPS7	YDR349C	5970	14210	110	676	710	339	47	49	12	100	100	0	1728	1815	1016	59	58	20	100	98	0	0.377	0.378	0.387	0.422	2.046	0.331	0.822	80	571	2298	2419	-1.408	629	1669	663	1756	0
1	20	2	YRA1	YDR381W	6170	14210	120	1934	1774	1046	48	49	12	100	99	0	3122	2921	1804	60	59	27	100	100	0	0.616	0.603	0.596	0.607	2.064	0.575	0.874	120	605	4948	4587	-0.699	1886	3062	1726	2861	0
1	21	2	YDR413C	YDR413C	6360	14200	110	2017	1752	696	49	58	74	100	98	0	10211	8187	3816	61	95	335	100	98	0	0.194	0.21	0.205	0.224	1.59	0.189	0.902	80	583	12118	9829	-2.367	1968	10150	1703	8126	0
1	1	3	SBE2	YDR351W	2370	14450	110	2877	2532	1244	46	53	58	100	100	0	13103	10750	6162	57	90	383	97	93	0	0.217	0.232	0.227	0.265	1.708	0.215	0.924	80	550	15877	13179	-2.204	2831	13046	2486	10693	0
1	2	3	YDR383C	YDR383C	2570	14450	110	3987	3484	1366	45	51	49	100	100	0	10104	8344	3699	57	86	361	100	98	0	0.392	0.415	0.409	0.437	1.507	0.387	0.929	80	584	13989	11726	-1.35	3942	10047	3439	8287	0
1	3	3	YDR415C	YDR415C	2790	14450	120	1686	1707	1128	46	48	14	99	99	0	9804	8706	5955	57	58	40	99	97	0	0.168	0.192	0.195	0.218	2.226	0.18	0.887	120	662	11387	10310	-2.571	1640	9747	1661	8649	0
1	4	3	TRR1	YDR353W	2990	14450	130	1862	1635	824	45	46	10	100	100	0	6750	5957	3293	58	58	32	100	99	0	0.272	0.27	0.261	0.294	1.807	0.249	0.907	120	682	8509	7489	-1.881	1817	6692	1590	5899	0
1	5	3	EFT2	YDR385W	3200	14450	120	3508	3252	1764	45	48	14	100	100	0	12483	10609	6416	59	60	37	100	100	0	0.279	0.304	0.299	0.325	1.88	0.275	0.881	120	618	15887	13757	-1.843	3463	12424	3207	10550	0
1	6	3	YDR417C	YDR417C	3400	14450	130	1799	1727	917	46	47	11	100	100	0	4154	3712	2224	59	58	25	100	98	0	0.428	0.46	0.455	0.525	1.911	0.421	0.899	120	660	5848	5334	-1.224	1753	4095	1681	3653	0
1	7	3	YER097W	YER097W	3580	14430	110	791	699	392	45	49	21	97	96	0	4196	3525	1902	60	69	126	96	93	0	0.18	0.189	0.188	0.192	2.162	0.183	0.88	80	525	4882	4119	-2.471	746	4136	654	3465	0
1	8	3	YER128W	YER128W	3780	14440	120	1392	1297	742	45	48	21	100	98	0	6806	6265	3592	59	71	146	96	93	0	0.2	0.202	0.203	0.226	2.149	0.193	0.895	120	593	8094	7458	-2.324	1347	6747	1252	6206	0
1	9	3	YER160C	YER160C	3980	14440	120	3347	3477	2824	45	46	11	100	99	0	4511	4920	4101	59	57	18	95	95	0	0.742	0.706	0.7	0.906	2.571	0.678	0.85	120	595	7754	8293	-0.431	3302	4452	3432	4861	0
1	10	3	PRS2	YER099C	4190	14430	120	2999	2811	1736	46	48	17	99	99	0	7250	6982	4525	60	58	20	100	98	0	0.411	0.399	0.385	0.437	2.131	0.383	0.932	120	609	10143	9687	-1.284	2953	7190	2765	6922	0
1	11	3	YER130C	YER130C	4390	14430	130	4877	4765	3086	47	48	13	99	99	0	5330	4706	3047	59	57	18	99	98	0	0.916	1.015	1.017	1.075	2.198	1.016	0.909	120	666	10101	9365	-0.126	4830	5271	4718	4647	0
1	12	3	RAD4	YER162C	4590	14430	120	3607	3283	2237	47	50	18	98	98	0	9261	9337	6501	59	63	48	99	98	0	0.387	0.349	0.337	0.343	1.851	0.336	0.921	120	600	12762	12514	-1.37	3560	9202	3236	9278	0
1	13	3	AST2	YER101C	4780	14430	120	3822	3248	1520	46	47	10	100	100	0	8556	7460	3372	59	56	18	100	100	0	0.444	0.433	0.449	0.439	1.61	0.425	0.927	120	559	12273	10603	-1.17	3776	8497	3202	7401	0
1	14	3	PMD1	YER132C	4980	14430	120	4327	3770	2045	47	49	11	100	100	0	8648	7787	4387	58	56	17	98	97	0	0.498	0.482	0.48	0.553	2.157	0.462	0.905	120	590	12870	11452	-1.005	4280	8590	3723	7729	0
1	15	3	CHD1	YER164W	5190	14420	120	3688	3314	1964	49	52	25	100	100	0	9648	8602	5505	59	61	37	100	100	0	0.379	0.382	0.364	0.407	1.855	0.363	0.928	120	645	13228	11808	-1.398	3639	9589	3265	8543	0
1	16	3	SSA4	YER103W	5400	14430	130	3586	3513	2148	49	60	147	95	93	0	7822	8183	5285	60	80	287	95	91	0	0.456	0.426	0.421	0.462	1.789	0.394	0.91	120	680	11299	11587	-1.134	3537	7762	3464	8123	0
1	17	3	YER134C	YER134C	5600	14420	120	1032	966	510	48	49	12	100	100	0	5908	5194	2915	59	58	18	100	100	0	0.168	0.179	0.182	0.187	1.722	0.168	0.901	120	596	6833	6053	-2.571	984	5849	918	5135	0
1	18	3	YER166W	YER166W	5790	14410	110	348	351	193	47	48	11	98	97	0	822	873	558	58	57	17	98	97	0	0.394	0.373	0.387	0.392	1.927	0.338	0.84	80	527	1065	1119	-1.344	301	764	304	815	0
1	19	3	AMS1	YGL156W	5990	14410	120	1627	1802	1263	47	49	16	100	99	0	4634	5720	4144	59	59	24	100	100	0	0.345	0.31	0.313	0.331	1.891	0.297	0.906	120	627	6155	7416	-1.534	1580	4575	1755	5661	0
1	20	3	YGL188C	YGL188C	6200	14410	120	518	545	301	47	49	11	99	99	0	1666	1673	1038	58	56	17	99	98	0	0.293	0.308	0.293	0.333	2.203	0.276	0.813	120	566	2079	2113	-1.771	471	1608	498	1615	0
1	21	3	YGL220W	YGL220W	6380	14410	110	1609	1530	742	49	57	69	100	100	0	8524	7011	3869	61	85	228	100	97	0	0.184	0.213	0.218	0.236	1.68	0.202	0.916	80	558	10023	8431	-2.44	1560	8463	1481	6950	0
1	1	4	RCK1	YGL158W	2390	14660	120	1609	1788	1133	45	51	52	99	98	0	6272	6586	4597	57	77	343	95	90	0	0.252	0.267	0.265	0.298	1.917	0.251	0.93	120	646	7779	8272	-1.991	1564	6215	1743	6529	0
1	2	4	CDC55	YGL190C	2590	14660	120	2108	2130	1330	46	48	15	100	100	0	3864	4199	2824	57	57	39	100	100	0	0.542	0.503	0.496	0.537	1.736	0.478	0.918	120	605	5869	6226	-0.885	2062	3807	2084	4142	0
1	3	4	YGL222C	YGL222C	2800	14660	120	1488	1383	684	45	46	11	100	99	0	4402	4194	2554	56	55	18	100	100	0	0.332	0.323	0.316	0.39	2.028	0.294	0.918	120	591	5789	5476	-1.591	1443	4346	1338	4138	0
1	4	4	YGL160W	YGL160W	3000	14660	120	2372	2226	1360	45	46	13	100	100	0	6705	6632	4438	59	56	20	100	99	0	0.35	0.332	0.308	0.362	1.889	0.309	0.902	120	543	8973	8754	-1.514	2327	6646	2181	6573	0
1	5	4	IME4	YGL192W	3190	14650	120	3914	3635	2190	46	48	13	100	100	0	6864	6249	3936	59	57	20	100	100	0	0.568	0.58	0.563	0.605	1.785	0.563	0.948	120	559	10673	9779	-0.815	3868	6805	3589	6190	0
1	6	4	YGL224C	YGL224C	3390	14650	130	3804	3538	2145	47	50	16	100	100	0	5047	4992	3059	61	64	32	100	99	0	0.754	0.708	0.691	0.763	1.883	0.699	0.925	120	630	8743	8422	-0.408	3757	4986	3491	4931	0
1	7	4	SUT1	YGL162W	3600	14650	120	1138	1308	853	48	52	21	98	97	0	3678	3840	2656	62	76	139	93	92	0	0.301	0.334	0.328	0.355	2.145	0.316	0.913	120	550	4706	5038	-1.73	1090	3616	1260	3778	0
1	8	4	HOS2	YGL194C	3800	14650	190	4676	4143	1949	46	49	20	99	99	0	7372	6272	3073	60	70	120	95	93	0	0.633	0.66	0.65	0.726	1.797	0.639	0.947	256	938	11942	10309	-0.659	4630	7312	4097	6212	0
1	9	4	YGL226W	YGL226W	4000	14640	120	3077	2992	1736	46	48	16	100	100	0	6793	5921	3269	60	59	21	100	100	0	0.45	0.503	0.485	0.518	1.774	0.495	0.902	120	509	9764	8807	-1.151	3031	6733	2946	5861	0
1	10	4	YGR277C	YGR277C	4200	14630	130	1825	1709	1122	47	50	17	97	95	0	6521	6508	4467	61	60	24	98	95	0	0.275	0.258	0.263	0.302	2.249	0.249	0.918	120	631	8238	8109	-1.861	1778	6460	1662	6447	0
1	11	4	YHL013C	YHL013C	4400	14640	120	4806	4266	2478	48	50	15	100	100	0	6497	6040	4018	61	60	22	94	94	0	0.739	0.705	0.688	0.867	2.273	0.659	0.909	120	558	11194	10197	-0.436	4758	6436	4218	5979	0
1	12	4	YHL045W	YHL045W	4590	14640	120	6597	5885	3181	47	49	11	100	100	0	11384	10101	6237	60	58	18	100	100	0	0.578	0.581	0.583	0.675	1.811	0.544	0.917	120	558	17874	15879	-0.79	6550	11324	5838	10041	0
1	13	4	SCW4	YGR279C	4800	14630	130	2100	1961	1139	45	47	10	100	100	0	6265	5959	3563	58	59	59	99	98	0	0.331	0.325	0.325	0.347	1.87	0.313	0.926	120	647	8262	7817	-1.595	2055	6207	1916	5901	0
1	14	4	RPS20	YHL015W	5010	14630	120	2585	2391	1381	47	48	11	100	99	0	3433	3131	1895	59	56	17	95	95	0	0.752	0.763	0.76	0.832	1.866	0.742	0.917	120	560	5912	5416	-0.411	2538	3374	2344	3072	0
1	15	4	YHL047C	YHL047C	5200	14630	120	6491	6744	4339	48	49	11	100	100	0	6797	7029	5074	60	57	17	100	100	0	0.956	0.961	1.009	1.167	1.882	0.914	0.911	120	591	13180	13665	-0.064	6443	6737	6696	6969	0
1	16	4	YOR1	YGR281W	5410	14630	130	2042	2287	1665	48	49	11	98	97	0	4328	4731	3698	60	60	30	93	92	0	0.467	0.479	0.502	0.563	2.14	0.456	0.927	120	635	6262	6910	-1.098	1994	4268	2239	4671	0
1	17	4	YHL017W	YHL017W	5600	14630	120	6794	6644	4291	49	50	12	100	100	0	6698	6808	4818	60	61	37	99	97	0	1.016	0.977	0.975	1.185	2.026	0.941	0.92	120	564	13383	13343	0.023	6745	6638	6595	6748	0
1	18	4	YHL049C	YHL049C	5800	14620	130	19129	17769	9833	49	52	21	100	100	0	23273	22310	12239	60	61	29	100	100	0	0.822	0.796	0.802	0.842	1.847	0.792	0.923	120	673	42293	39970	-0.283	19080	23213	17720	22250	0
1	19	4	YGR283C	YGR283C	6010	14620	130	3174	3962	2906	48	51	22	99	98	0	4408	4872	3740	60	61	29	96	94	0	0.719	0.813	0.823	0.955	2.11	0.795	0.919	120	624	7474	8726	-0.476	3126	4348	3914	4812	0
1	20	4	APM2	YHL019C	6200	14610	130	3603	3606	2362	49	50	16	100	100	0	7981	8286	5845	60	60	30	100	100	0	0.449	0.432	0.418	0.472	1.878	0.412	0.922	120	622	11475	11783	-1.156	3554	7921	3557	8226	0
1	21	4	YHR001W	YHR001W	6410	14620	130	10460	10138	6241	49	52	28	100	100	0	5651	5299	3406	62	74	181	99	95	0	1.863	1.926	1.922	2.112	1.74	1.936	0.929	120	742	16000	15326	0.897	10411	5589	10089	5237	0
1	1	5	YIL087C	YIL087C	2400	14860	130	1927	1894	1079	45	46	11	100	100	0	6205	5402	3162	58	56	21	100	100	0	0.306	0.346	0.344	0.355	1.729	0.335	0.898	120	695	8029	7193	-1.708	1882	6147	1849	5344	0
1	2	5	RPI1	YIL119C	2610	14860	120	3229	2937	1624	45	46	12	100	100	0	3896	3612	2111	57	55	19	98	97	0	0.829	0.814	0.792	0.883	2.093	0.786	0.868	120	566	7023	6447	-0.27	3184	3839	2892	3555	0
1	3	5	YIL151C	YIL151C	2800	14850	110	350	444	325	43	45	14	97	93	0	564	730	544	57	56	21	96	91	0	0.606	0.596	0.619	0.639	2.221	0.594	0.843	80	501	814	1074	-0.724	307	507	401	673	0
1	4	5	YIL089W	YIL089W	3010	14850	130	2655	2322	1547	44	46	13	97	95	0	3045	3108	2294	58	57	22	91	91	0	0.874	0.747	0.724	0.802	2.531	0.688	0.832	120	637	5598	5328	-0.194	2611	2987	2278	3050	0
1	5	5	YIL121W	YIL121W	3210	14860	120	3033	3221	1848	46	48	12	100	100	0	4362	4632	3064	60	59	25	99	99	0	0.694	0.694	0.71	0.823	2.151	0.644	0.886	120	549	7289	7747	-0.526	2987	4302	3175	4572	0
1	6	5	RRD1	YIL153W	3400	14850	120	2121	2083	1142	47	51	16	100	99	0	5727	5405	3547	60	64	37	99	97	0	0.366	0.381	0.386	0.48	2.422	0.34	0.874	120	537	7741	7381	-1.45	2074	5667	2036	5345	0
1	7	5	YIL091C	YIL091C	3600	14850	120	4245	3990	2443	47	51	30	100	99	0	6028	5746	4291	60	67	61	93	91	0	0.703	0.693	0.709	0.97	2.786	0.619	0.867	120	566	10166	9629	-0.508	4198	5968	3943	5686	0
1	8	5	SIM1	YIL123W	3820	14840	130	2508	3097	2254	47	49	18	100	100	0	5002	6311	4857	59	61	44	98	94	0	0.498	0.488	0.48	0.536	2.241	0.453	0.881	120	570	7404	9302	-1.006	2461	4943	3050	6252	0
1	9	5	GUT2	YIL155C	4000	14850	120	4525	4816	3022	48	49	11	100	100	0	4566	4463	2955	60	57	17	100	99	0	0.994	1.083	1.102	1.278	2.341	1.063	0.898	120	522	8983	9171	-0.009	4477	4506	4768	4403	0
1	10	5	YIL093C	YIL093C	4210	14840	120	1440	1311	752	47	49	12	99	99	0	4352	4185	2563	62	61	23	100	100	0	0.325	0.307	0.303	0.323	1.85	0.288	0.897	120	565	5683	5387	-1.623	1393	4290	1264	4123	0
1	11	5	KGD1	YIL125W	4400	14840	120	1202	1349	957	46	48	11	98	98	0	3991	4591	3612	62	60	18	100	99	0	0.294	0.288	0.283	0.32	2.371	0.262	0.878	120	529	5085	5832	-1.765	1156	3929	1303	4529	0
1	12	5	YIL157C	YIL157C	4610	14830	120	2002	1879	1201	47	48	11	99	99	0	6004	5484	3654	60	58	18	100	97	0	0.329	0.338	0.339	0.374	2.093	0.319	0.893	120	560	7899	7256	-1.604	1955	5944	1832	5424	0
1	13	5	YJR026W	YJR026W	4810	14830	120	3529	4164	3656	46	47	10	99	99	0	7046	7588	6652	58	59	64	95	92	0	0.498	0.547	0.514	0.611	2.445	0.532	0.901	120	543	10471	11648	-1.005	3483	6988	4118	7530	0
1	14	5	APS2	YJR058C	5010	14830	120	992	1004	662	46	47	11	99	97	0	2902	3042	2350	60	68	160	87	84	0	0.333	0.321	0.334	0.416	2.653	0.289	0.89	120	582	3788	3940	-1.587	946	2842	958	2982	0
1	15	5	JSN1	YJR091C	5210	14830	110	273	302	181	46	48	11	98	96	0	915	1045	741	60	68	158	86	80	0	0.265	0.26	0.264	0.313	1.996	0.239	0.865	80	515	1082	1241	-1.913	227	855	256	985	0
1	16	5	YJR028W	YJR028W	5410	14830	110	3580	4375	3438	47	49	12	100	100	0	6925	8165	6187	61	59	21	100	98	0	0.515	0.534	0.51	0.577	1.746	0.534	0.898	80	514	10397	12432	-0.958	3533	6864	4328	8104	0
1	17	5	CBF1	YJR060W	5610	14820	110	177	205	120	47	48	11	96	92	0	484	502	367	60	61	42	86	80	0	0.307	0.357	0.385	0.426	2.081	0.313	0.814	80	517	554	600	-1.706	130	424	158	442	0
1	18	5	FIP1	YJR093C	5800	14810	100	485	650	610	48	49	13	92	88	0	1009	1284	1228	60	60	27	87	85	0	0.46	0.492	0.455	0.506	2.119	0.473	0.882	80	481	1386	1826	-1.119	437	949	602	1224	0
1	19	5	YJR030C	YJR030C	6020	14800	110	2089	2155	1438	49	49	11	100	100	0	4029	3966	2679	61	60	20	97	96	0	0.514	0.539	0.544	0.638	2.252	0.514	0.885	80	543	6008	6011	-0.96	2040	3968	2106	3905	0
1	20	5	NTA1	YJR062C	6220	14800	110	770	882	632	49	50	11	97	96	0	1216	1490	1093	60	70	171	85	81	0	0.624	0.583	0.619	0.584	2.181	0.552	0.826	80	530	1877	2263	-0.681	721	1156	833	1430	0
1	21	5	RPL43B	YJR094W-A	6410	14800	110	1759	1997	1464	49	51	15	100	100	0	4692	4881	3830	59	73	174	97	93	0	0.369	0.404	0.406	0.454	1.825	0.37	0.912	80	536	6343	6770	-1.438	1710	4633	1948	4822	0
1	1	6	CPR7	YJR032W	2410	15040	110	1067	901	683	45	57	79	78	70	0	2778	2658	2259	61	85	190	70	65	0	0.376	0.33	0.337	0.445	2.863	0.296	0.841	80	566	3739	3453	-1.411	1022	2717	856	2597	0
1	2	6	CCT5	YJR064W	2630	15050	120	2007	2040	1495	45	57	78	90	84	0	5077	5025	4109	59	84	190	85	80	0	0.391	0.402	0.407	0.516	3.23	0.361	0.852	120	580	6980	6961	-1.355	1962	5018	1995	4966	0
1	3	6	YJR096W	YJR096W	2810	15040	110	2076	1753	1155	45	54	79	91	82	0	4158	3597	2577	58	75	177	82	78	0	0.495	0.483	0.466	0.582	2.856	0.443	0.872	80	531	6131	5247	-1.013	2031	4100	1708	3539	0
1	4	6	YKR021W	YKR021W	3040	15050	120	1275	1237	802	44	52	74	90	83	0	2768	2504	1804	57	73	166	85	80	0	0.454	0.488	0.501	0.594	3.219	0.441	0.824	120	602	3942	3640	-1.139	1231	2711	1193	2447	0
1	5	6	YSR3	YKR053C	3220	15040	110	1162	1324	1060	45	52	51	88	81	0	1376	1670	1478	58	71	149	73	70	0	0.847	0.793	0.789	0.91	2.895	0.716	0.787	80	484	2435	2891	-0.239	1117	1318	1279	1612	0
1	6	6	MRPL20	YKR085C	3420	15030	110	209	282	208	46	53	53	68	56	0	735	921	782	57	69	84	71	68	0	0.24	0.273	0.256	0.26	2.764	0.245	0.78	80	512	841	1100	-2.056	163	678	236	864	0
1	7	6	YKR023W	YKR023W	3620	15040	130	4025	4083	2961	46	51	31	100	96	0	5495	5185	4078	58	63	54	90	86	0	0.732	0.787	0.768	1.053	2.852	0.747	0.866	120	710	9416	9164	-0.45	3979	5437	4037	5127	0
1	8	6	RHO4	YKR055W	3850	15050	90	158	173	93	47	50	18	90	80	0	280	336	243	61	61	33	88	84	0	0.507	0.458	0.469	0.451	1.779	0.363	0.717	52	374	330	401	-0.98	111	219	126	275	0
1	9	6	YKR087C	YKR087C	4020	15030	120	3974	3718	2368	46	48	12	99	98	0	4150	3490	2374	60	57	18	94	93	0	0.96	1.071	1.066	1.338	2.971	1.043	0.893	120	566	8018	7102	-0.058	3928	4090	3672	3430	0
1	10	6	RPC37	YKR025W	4220	15020	110	3744	3151	1889	47	50	18	100	98	0	7519	6364	3934	67	70	28	97	92	0	0.496	0.493	0.51	0.614	2.454	0.471	0.911	80	507	11149	9401	-1.011	3697	7452	3104	6297	0
1	11	6	RPS21A	YKR057W	4420	15020	120	783	880	678	47	50	23	94	87	0	3059	3054	2665	66	75	93	80	77	0	0.246	0.279	0.281	0.394	3.373	0.249	0.846	120	577	3729	3821	-2.024	736	2993	833	2988	0
1	12	6	YKR089C	YKR089C	4630	15030	120	318	375	281	45	48	24	90	83	0	542	656	591	60	65	93	80	70	0	0.566	0.554	0.568	0.634	2.474	0.485	0.835	120	559	755	926	-0.82	273	482	330	596	0
1	13	6	YKR027W	YKR027W	4820	15020	120	3358	3314	2215	46	49	21	99	98	0	9281	7584	5408	59	58	21	95	94	0	0.359	0.434	0.434	0.537	2.697	0.403	0.873	120	535	12534	10793	-1.477	3312	9222	3268	7525	0
1	14	6	TIF1	YKR059W	5010	15020	110	2143	1996	1350	47	51	25	97	95	0	5368	5219	3855	60	75	166	90	86	0	0.395	0.378	0.375	0.434	2.442	0.343	0.89	80	515	7404	7108	-1.341	2096	5308	1949	5159	0
1	15	6	SRL3	YKR091W	5240	15020	120	1297	1343	983	46	49	20	98	95	0	4594	4567	3520	60	74	158	85	79	0	0.276	0.288	0.293	0.361	2.592	0.267	0.88	120	604	5785	5804	-1.858	1251	4534	1297	4507	0
1	16	6	YLR232W	YLR232W	5430	15010	120	1834	1590	1012	46	48	11	95	92	0	3178	2588	1799	61	64	121	85	79	0	0.574	0.611	0.596	0.669	2.113	0.573	0.886	120	554	4905	4071	-0.802	1788	3117	1544	2527	0
1	17	6	RPS28B	YLR264W	5620	15020	120	2412	2466	1710	46	48	11	98	97	0	3782	3352	2448	61	65	119	85	81	0	0.636	0.735	0.751	0.834	2.323	0.705	0.889	120	584	6087	5711	-0.653	2366	3721	2420	3291	0
1	18	6	ATP14	YLR295C	5820	15000	110	940	909	628	47	51	32	91	86	0	3635	3334	2430	61	68	100	83	78	0	0.25	0.263	0.274	0.327	2.356	0.25	0.9	80	533	4467	4135	-2.001	893	3574	862	3273	0
1	19	6	TOP3	YLR234W	6010	15000	110	1744	1566	971	48	58	77	91	86	0	7295	7308	4888	62	107	354	88	85	0	0.234	0.209	0.217	0.257	2.215	0.202	0.926	80	542	8929	8764	-2.092	1696	7233	1518	7246	0
1	20	6	YLR266C	YLR266C	6210	15010	120	888	1065	845	49	56	66	88	81	0	2357	2706	2326	60	94	321	74	70	0	0.365	0.384	0.389	0.484	2.586	0.36	0.915	120	638	3136	3662	-1.453	839	2297	1016	2646	0
1	21	6	YLR297W	YLR297W	6430	15010	130	2421	2455	1628	48	50	14	100	99	0	4443	4290	2994	60	63	62	95	93	0	0.541	0.569	0.567	0.643	1.933	0.549	0.925	120	719	6756	6637	-0.885	2373	4383	2407	4230	0
1	1	7	YLR236C	YLR236C	2420	15250	110	338	307	175	46	48	25	85	78	0	2380	2032	1358	60	67	83	82	81	0	0.126	0.132	0.126	0.152	2.229	0.124	0.881	80	605	2612	2233	-2.99	292	2320	261	1972	0
1	2	7	SEC22	YLR268W	2640	15250	120	2658	2286	1476	45	47	14	97	96	0	5325	4540	3140	58	65	81	92	85	0	0.496	0.5	0.489	0.58	2.545	0.469	0.863	120	589	7880	6723	-1.011	2613	5267	2241	4482	0
1	3	7	ECM38	YLR299W	2820	15250	120	2004	2018	1424	45	48	24	97	94	0	5778	6185	4952	57	60	40	92	92	0	0.342	0.322	0.311	0.439	3.03	0.283	0.846	120	590	7680	8101	-1.546	1959	5721	1973	6128	0
1	4	7	YLR238W	YLR238W	3040	15250	120	4889	4064	2276	44	46	16	100	99	0	11976	9344	5292	58	59	30	100	100	0	0.407	0.433	0.422	0.444	2.126	0.411	0.877	120	571	16763	13306	-1.299	4845	11918	4020	9286	0
1	5	7	YLR270W	YLR270W	3230	15250	120	3718	3366	2042	44	48	40	97	97	0	6834	5488	3681	58	66	136	88	85	0	0.542	0.612	0.608	0.809	2.846	0.568	0.87	120	547	10450	8752	-0.883	3674	6776	3322	5430	0
1	6	7	YLR301W	YLR301W	3420	15240	120	2514	2264	1365	45	47	21	99	97	0	4308	3619	2476	58	63	122	87	82	0	0.581	0.623	0.626	0.834	2.874	0.572	0.884	120	610	6719	5780	-0.784	2469	4250	2219	3561	0
1	7	7	MPT1	YMR005W	3630	15240	110	11850	11667	7109	45	48	19	100	100	0	3344	3316	2287	58	57	22	95	93	0	3.593	3.567	3.422	4.243	2.227	3.472	0.894	80	540	15091	14880	1.845	11805	3286	11622	3258	0
1	8	7	MIH1	YMR036C	3830	15230	110	607	597	386	46	49	28	88	85	0	1147	1027	663	59	61	55	85	81	0	0.516	0.569	0.551	0.537	2.403	0.542	0.836	80	534	1649	1519	-0.956	561	1088	551	968	0
1	9	7	YMR067C	YMR067C	4020	15230	110	479	461	290	46	50	28	90	81	0	953	828	582	60	63	56	78	73	0	0.485	0.54	0.533	0.605	2.556	0.497	0.841	80	528	1326	1183	-1.044	433	893	415	768	0
1	10	7	YMR007W	YMR007W	4220	15240	120	1319	1359	889	47	50	16	99	97	0	2042	2041	1506	65	66	26	93	90	0	0.643	0.664	0.674	0.836	2.449	0.618	0.905	120	613	3249	3288	-0.636	1272	1977	1312	1976	0
1	11	7	LYS7	YMR038C	4420	15230	120	1311	1243	812	47	48	12	99	96	0	4613	4213	2946	64	64	23	92	90	0	0.278	0.288	0.29	0.353	2.772	0.269	0.889	120	587	5813	5345	-1.848	1264	4549	1196	4149	0
1	12	7	YMR069W	YMR069W	4630	15230	120	417	412	264	45	47	17	91	89	0	926	1022	732	58	58	20	94	91	0	0.429	0.381	0.372	0.385	2.083	0.347	0.841	120	557	1240	1331	-1.222	372	868	367	964	0
1	13	7	YMR009W	YMR009W	4830	15220	120	649	595	364	46	47	12	97	95	0	3075	3194	2201	60	58	19	94	92	0	0.2	0.175	0.174	0.206	2.686	0.157	0.839	120	573	3618	3683	-2.322	603	3015	549	3134	0
1	14	7	YMR040W	YMR040W	5030	15220	120	663	716	554	46	49	23	92	86	0	1963	2402	2052	59	61	47	86	84	0	0.324	0.286	0.279	0.336	2.62	0.263	0.877	120	592	2521	3013	-1.626	617	1904	670	2343	0
1	15	7	YMR071C	YMR071C	5240	15220	120	1213	1171	858	47	48	11	95	93	0	4497	4746	3611	60	62	50	88	86	0	0.263	0.24	0.237	0.263	2.502	0.228	0.901	120	576	5603	5810	-1.928	1166	4437	1124	4686	0
1	16	7	HXT2	YMR011W	5430	15220	110	7923	6826	3630	47	49	15	100	100	0	11654	9730	5550	62	68	128	98	93	0	0.679	0.701	0.696	0.794	1.9	0.684	0.929	80	510	19468	16447	-0.558	7876	11592	6779	9668	0
1	17	7	ARG80	YMR042W	5630	15220	120	915	864	486	46	49	15	97	95	0	5048	4479	2656	61	70	156	92	89	0	0.174	0.185	0.184	0.206	2.176	0.175	0.897	120	564	5856	5236	-2.521	869	4987	818	4418	0
1	18	7	YMR073C	YMR073C	5830	15210	120	2397	2058	1239	48	50	30	96	95	0	4656	3904	2518	59	68	128	85	85	0	0.511	0.523	0.516	0.657	2.483	0.492	0.874	120	604	6946	5855	-0.969	2349	4597	2010	3845	0
1	19	7	YNL047C	YNL047C	6030	15210	120	3490	3350	2104	48	53	62	99	97	0	7201	6608	4470	60	75	242	93	89	0	0.482	0.504	0.501	0.602	2.241	0.479	0.921	120	589	10583	9850	-1.053	3442	7141	3302	6548	0
1	20	7	YNL080C	YNL080C	6230	15210	120	4030	3893	2591	47	48	10	99	98	0	4728	4999	3661	60	58	17	95	92	0	0.853	0.779	0.781	0.868	2.216	0.737	0.892	120	560	8651	8785	-0.229	3983	4668	3846	4939	0
1	21	7	DBP2	YNL112W	6440	15190	130	2251	2136	1399	48	49	10	100	100	0	4942	5131	3513	60	70	224	90	90	0	0.451	0.412	0.402	0.47	2.156	0.395	0.875	120	690	7085	7159	-1.148	2203	4882	2088	5071	0
1	1	8	SFB2	YNL049C	2440	15460	120	612	636	469	45	46	12	94	90	0	1200	1154	888	58	60	60	82	78	0	0.496	0.539	0.558	0.577	2.612	0.514	0.877	120	661	1709	1687	-1.01	567	1142	591	1096	0
1	2	8	PMS1	YNL082W	2640	15450	110	3860	3735	2532	45	47	15	100	98	0	4014	4098	2877	58	57	22	95	93	0	0.964	0.913	0.906	1.104	2.476	0.888	0.886	80	528	7771	7730	-0.052	3815	3956	3690	4040	0
1	3	8	YNL114C	YNL114C	2850	15450	120	807	967	744	45	47	18	92	88	0	2667	3093	2558	58	60	42	86	84	0	0.292	0.304	0.312	0.353	2.941	0.272	0.818	120	594	3371	3957	-1.776	762	2609	922	3035	0
1	4	8	YNL051W	YNL051W	3050	15450	130	4343	3810	2355	44	46	16	100	100	0	4622	4194	2873	58	59	38	94	91	0	0.942	0.911	0.941	1.091	2.725	0.881	0.844	120	616	8863	7902	-0.086	4299	4564	3766	4136	0
1	5	8	END3	YNL084C	3250	15440	120	1977	2171	1572	45	45	11	99	97	0	3192	3125	2349	57	55	18	95	94	0	0.616	0.693	0.711	0.799	2.519	0.664	0.867	120	560	5067	5194	-0.698	1932	3135	2126	3068	0
1	6	8	YNL116W	YNL116W	3450	15440	120	4191	4010	2788	46	48	19	99	99	0	7621	7006	5130	58	61	67	93	91	0	0.548	0.571	0.589	0.683	2.791	0.533	0.82	120	575	11708	10912	-0.868	4145	7563	3964	6948	0
1	7	8	MSG5	YNL053W	3660	15440	120	2723	2769	1924	47	49	19	98	95	0	7427	6658	4583	60	63	68	94	90	0	0.363	0.413	0.442	0.505	2.816	0.394	0.85	120	552	10043	9320	-1.461	2676	7367	2722	6598	0
1	8	8	YNL086W	YNL086W	3840	15430	120	1235	1064	689	46	49	27	91	90	0	6799	5823	3745	60	62	53	93	90	0	0.176	0.177	0.179	0.191	2.666	0.168	0.86	120	561	7928	6781	-2.503	1189	6739	1018	5763	0
1	9	8	DCP2	YNL118C	4040	15440	120	1626	1846	1376	46	48	12	96	96	0	4642	5303	4357	62	61	24	92	90	0	0.345	0.343	0.356	0.412	2.786	0.308	0.849	120	597	6160	7041	-1.535	1580	4580	1800	5241	0
1	10	8	CMK2	YOL016C	4240	15420	110	901	1018	813	47	49	16	90	88	0	1286	1513	1359	62	62	23	82	81	0	0.698	0.669	0.658	0.693	2.836	0.604	0.77	80	502	2078	2422	-0.519	854	1224	971	1451	0
1	11	8	YOL048C	YOL048C	4440	15430	130	2712	2398	1651	47	49	15	96	95	0	3384	3152	2283	61	60	22	90	87	0	0.802	0.761	0.749	0.802	2.628	0.723	0.84	120	637	5988	5442	-0.318	2665	3323	2351	3091	0
1	12	8	YOL080C	YOL080C	4640	15420	120	1258	1454	1153	46	48	12	96	92	0	3412	3646	3028	59	58	17	90	90	0	0.361	0.393	0.374	0.427	2.728	0.358	0.811	120	558	4565	4995	-1.468	1212	3353	1408	3587	0
1	13	8	TLG2	YOL018C	4840	15430	120	4879	4802	3345	46	47	11	100	100	0	6000	6393	4839	59	58	20	100	100	0	0.813	0.751	0.721	0.868	2.634	0.708	0.861	120	559	10774	11090	-0.298	4833	5941	4756	6334	0
1	14	8	YOL050C	YOL050C	5040	15420	120	604	632	398	46	46	11	98	95	0	2711	2275	1533	59	58	20	94	93	0	0.21	0.264	0.264	0.277	2.257	0.245	0.834	120	559	3210	2802	-2.249	558	2652	586	2216	0
1	15	8	YOL082W	YOL082W	5240	15420	120	1065	1130	790	47	48	11	97	94	0	5506	5199	3992	60	59	18	95	92	0	0.187	0.211	0.206	0.233	2.775	0.188	0.825	120	556	6464	6222	-2.419	1018	5446	1083	5139	0
1	16	8	TAT2	YOL020W	5440	15420	120	2116	2451	1958	47	49	14	99	98	0	5162	6600	5648	61	62	27	96	95	0	0.406	0.368	0.376	0.465	2.79	0.333	0.827	120	563	7170	8943	-1.302	2069	5101	2404	6539	0
1	17	8	SPE2	YOL052C	5640	15410	130	714	755	559	47	49	12	91	90	0	5848	6215	5035	62	64	98	94	89	0	0.115	0.115	0.119	0.126	2.617	0.105	0.85	120	615	6453	6861	-3.117	667	5786	708	6153	0
1	18	8	YOL084W	YOL084W	5840	15420	120	1241	1350	917	48	49	12	100	98	0	4644	4715	3517	61	60	19	95	95	0	0.26	0.28	0.281	0.329	2.856	0.25	0.826	120	544	5776	5956	-1.942	1193	4583	1302	4654	0
1	19	8	YOL022C	YOL022C	6030	15410	130	7674	7080	4315	48	50	12	100	100	0	4281	4085	2745	61	59	18	97	95	0	1.807	1.748	1.754	1.989	2.257	1.726	0.854	120	567	11846	11056	0.854	7626	4220	7032	4024	0
1	20	8	YOL053W	YOL053W	6220	15400	120	2910	2792	1605	47	48	11	100	100	0	8689	7521	4946	60	59	20	98	98	0	0.332	0.368	0.378	0.469	2.531	0.329	0.86	120	571	11492	10206	-1.592	2863	8629	2745	7461	0
1	21	8	ADH1	YOL086C	6440	15410	120	2028	1950	1321	48	49	11	100	100	0	6198	6253	4634	63	62	22	100	100	0	0.323	0.307	0.308	0.36	2.642	0.28	0.863	120	656	8115	8092	-1.632	1980	6135	1902	6190	0
1	1	9	RPL33B	YOR234C	2430	15650	120	3494	2896	1805	46	48	28	99	97	0	3551	2960	2013	59	59	36	94	90	0	0.987	0.982	0.95	1.072	2.341	0.945	0.884	120	616	6940	5751	-0.018	3448	3492	2850	2901	0
1	2	9	PNT1	YOR266W	2620	15640	110	240	237	138	46	49	20	85	78	0	355	375	271	59	61	40	72	72	0	0.655	0.604	0.555	0.577	2.726	0.536	0.821	80	529	490	507	-0.61	194	296	191	316	0
1	3	9	YOR298W	YOR298W	2830	15650	120	147	193	133	46	50	21	90	84	0	371	451	385	59	65	66	84	71	0	0.324	0.375	0.351	0.392	2.209	0.328	0.83	120	592	413	539	-1.627	101	312	147	392	0
1	4	9	DFR1	YOR236W	3030	15650	120	830	865	592	44	46	13	99	95	0	3294	3625	2837	58	59	39	95	89	0	0.243	0.23	0.223	0.281	2.405	0.208	0.884	120	549	4022	4388	-2.042	786	3236	821	3567	0
1	5	9	YOR268C	YOR268C	3230	15650	120	333	324	204	46	47	13	90	85	0	1465	1412	1022	60	60	22	89	87	0	0.204	0.206	0.205	0.238	2.16	0.189	0.861	120	559	1692	1630	-2.291	287	1405	278	1352	0
1	6	9	YOR300W	YOR300W	3440	15640	120	257	277	172	45	46	10	89	83	0	944	1026	758	59	62	75	83	79	0	0.24	0.24	0.229	0.261	2.5	0.217	0.852	120	590	1097	1199	-2.062	212	885	232	967	0
1	7	9	YOR238W	YOR238W	3630	15630	130	1225	1406	1120	46	48	14	94	93	0	2829	3189	2656	59	62	73	85	83	0	0.426	0.435	0.408	0.51	2.972	0.409	0.873	120	647	3949	4490	-1.232	1179	2770	1360	3130	0
1	8	9	VPH1	YOR270C	3840	15640	120	924	895	673	46	47	11	92	91	0	1426	1693	1402	61	59	20	85	83	0	0.643	0.52	0.517	0.588	2.788	0.477	0.862	120	536	2243	2481	-0.637	878	1365	849	1632	0
1	9	9	YOR302W	YOR302W	4030	15630	120	269	263	154	46	47	12	90	87	0	760	764	511	61	58	18	90	87	0	0.319	0.309	0.299	0.301	2.226	0.286	0.851	120	519	922	920	-1.648	223	699	217	703	0
1	10	9	YOR240W	YOR240W	4220	15620	110	3077	2934	2072	48	78	254	83	75	0	4411	4424	3414	62	97	275	76	73	0	0.696	0.662	0.634	0.772	2.443	0.623	0.887	80	567	7378	7248	-0.522	3029	4349	2886	4362	0
1	11	9	YTM1	YOR272W	4440	15630	120	2687	2607	1677	48	77	254	89	83	0	4391	4177	2834	61	95	274	88	79	0	0.609	0.622	0.623	0.728	2.381	0.597	0.892	120	564	6969	6675	-0.714	2639	4330	2559	4116	0
1	12	9	YOR304C-A	YOR304C-A	4640	15630	120	2460	2233	1326	47	48	14	97	97	0	2536	2135	1248	61	59	18	93	92	0	0.975	1.054	1.034	1.108	2.037	1.061	0.904	120	536	4888	4260	-0.037	2413	2475	2186	2074	0
1	13	9	GRE1	YPL223C	4840	15620	120	1707	1387	786	46	48	12	97	97	0	7417	6270	3700	60	59	20	96	96	0	0.226	0.216	0.212	0.24	2.132	0.206	0.908	120	543	9018	7551	-2.147	1661	7357	1341	6210	0
1	14	9	BBP1	YPL255W	5050	15620	120	2465	2556	1737	47	48	11	100	98	0	7906	7568	5602	59	59	22	96	96	0	0.308	0.334	0.341	0.42	2.652	0.309	0.885	120	545	10265	10018	-1.698	2418	7847	2509	7509	0
1	15	9	YPR004C	YPR004C	5240	15620	120	3365	3283	2222	47	47	10	100	99	0	3807	3966	2934	61	59	20	96	93	0	0.886	0.829	0.837	1.006	2.269	0.79	0.894	120	565	7064	7141	-0.175	3318	3746	3236	3905	0
1	16	9	YPL225W	YPL225W	5440	15610	130	2918	2561	1694	46	48	12	98	97	0	3629	3229	2127	62	60	19	96	95	0	0.805	0.794	0.781	0.858	2.238	0.792	0.899	120	600	6439	5682	-0.313	2872	3567	2515	3167	0
1	17	9	YPL257W	YPL257W	5640	15620	120	1296	1288	906	48	49	13	97	94	0	2004	1972	1483	63	61	18	92	90	0	0.643	0.65	0.637	0.76	2.581	0.613	0.877	120	559	3189	3149	-0.637	1248	1941	1240	1909	0
1	18	9	ICL2	YPR006C	5840	15610	120	3528	3352	2249	48	48	10	100	99	0	8394	8324	5955	62	61	18	100	97	0	0.418	0.4	0.403	0.478	2.319	0.374	0.894	120	544	11812	11566	-1.26	3480	8332	3304	8262	0
1	19	9	ALG5	YPL227C	6040	15600	130	3262	2984	2081	49	52	27	97	95	0	3911	4149	3102	61	61	23	95	94	0	0.835	0.718	0.656	0.764	2.347	0.688	0.871	120	599	7063	7023	-0.261	3213	3850	2935	4088	0
1	20	9	APM1	YPL259C	6230	15610	120	7193	6251	3910	48	50	27	100	100	0	6411	5329	3450	61	61	23	99	97	0	1.125	1.177	1.173	1.344	2.074	1.172	0.919	120	585	13495	11471	0.17	7145	6350	6203	5268	0
1	21	9	YPR008W	YPR008W	6430	15590	110	4944	4465	3166	49	116	565	80	76	0	5926	6058	4623	64	136	583	82	72	0	0.835	0.737	0.721	0.853	2.644	0.709	0.879	80	534	10757	10410	-0.26	4895	5862	4416	5994	0
1	1	10	YPL229W	YPL229W	2440	15850	130	1752	1680	1119	45	48	18	95	95	0	6467	6888	5201	58	59	38	95	95	0	0.266	0.239	0.239	0.279	2.233	0.215	0.88	120	712	8116	8465	-1.909	1707	6409	1635	6830	0
1	2	10	YPL261C	YPL261C	2650	15850	130	738	827	558	46	49	19	95	92	0	1780	1717	1245	59	62	42	87	86	0	0.402	0.471	0.475	0.53	2.329	0.44	0.887	120	666	2413	2439	-1.314	692	1721	781	1658	0
1	3	10	RPA135	YPR010C	2850	15850	130	3130	2978	2094	47	50	21	98	97	0	5258	5063	3503	61	66	59	95	93	0	0.593	0.586	0.57	0.62	2.09	0.571	0.896	120	623	8280	7933	-0.753	3083	5197	2931	5002	0
1	4	10	SEC7	YDR170C	3040	15840	110	83	153	230	44	46	11	76	70	0	118	266	423	60	58	18	75	63	0	0.672	0.529	0.518	0.499	3.301	0.495	0.749	80	454	97	315	-0.573	39	58	109	206	0
1	5	10	YRF1-1	YDR545W	3190	15810	100	69	76	32	49	57	72	8	0	0	87	113	69	63	78	131	11	2	0	0.833	0.54	0.562	0.633	2.715	0.433	0.664	80	419	44	77	-0.263	20	24	27	50	-100
1	6	10	SWI4	YER111C	3430	15840	90	71	96	105	45	47	14	67	48	0	107	166	250	60	60	27	73	42	0	0.553	0.481	0.545	0.45	3.153	0.404	0.844	52	410	73	157	-0.854	26	47	51	106	-100
1	7	10	ESP1	YGR098C	3650	15840	80	70	96	87	46	46	11	61	51	0	87	142	165	59	62	87	19	17	0	0.857	0.602	0.491	0.512	3.104	0.189	0.217	52	299	52	133	-0.222	24	28	50	83	-100
1	8	10	RIM101	YHL027W	3820	15830	150	56	105	191	44	46	11	50	28	0	68	197	510	60	58	20	34	22	0	1.5	0.445	0.563	0.615	3.281	0.351	0.819	156	670	20	198	0.585	12	8	61	137	-50
1	9	10	MIP6	YHR015W	4020	15830	150	49	124	261	44	46	10	39	24	0	68	236	602	61	58	18	34	19	0	0.714	0.457	0.444	0.481	3.697	0.367	0.625	156	731	12	255	-0.485	5	7	80	175	-50
1	10	10	VTH1	YIL173W	4240	15830	90	74	233	331	45	47	10	82	65	0	118	467	918	61	60	30	76	44	0	0.509	0.463	0.609	0.616	3.279	0.306	0.599	52	380	86	594	-0.975	29	57	188	406	0
1	11	10	YJR029W	YJR029W	4420	15820	150	58	146	331	47	64	177	8	7	0	73	245	697	61	81	191	10	7	0	0.917	0.538	0.538	0.627	3.487	0.44	0.777	156	721	23	283	-0.126	11	12	99	184	-50
1	12	10	YLL034C	YLL034C	4620	15820	150	53	109	198	46	47	12	40	26	0	71	182	500	60	59	19	33	22	0	0.636	0.516	0.583	0.699	3.746	0.348	0.686	156	628	18	185	-0.652	7	11	63	122	-50
1	13	10	ESC1	YMR219W	4820	15820	150	53	120	256	46	48	12	37	25	0	66	208	564	60	59	18	36	19	0	1.167	0.5	0.56	0.634	4.162	0.43	0.846	156	635	13	222	0.222	7	6	74	148	-50
1	14	10	YKU70	YMR284W	5020	15820	150	51	124	248	46	47	12	35	27	0	67	199	503	60	59	21	32	21	0	0.714	0.561	0.563	0.621	3.744	0.442	0.698	156	745	12	217	-0.485	5	7	78	139	-50
1	15	10	POL1	YNL102W	5260	15810	90	79	203	336	46	47	12	73	55	0	113	384	863	60	59	22	73	55	0	0.623	0.485	0.469	0.567	2.701	0.382	0.887	52	395	86	481	-0.684	33	53	157	324	0
1	16	10	YMRWdelta20	YMRWdelta20	5460	15810	130	260	243	119	46	48	13	93	92	0	1427	1475	981	63	60	19	97	94	0	0.157	0.14	0.145	0.17	2.456	0.122	0.839	120	669	1578	1609	-2.672	214	1364	197	1412	0
1	17	10	IntYNL112W	IntYNL112W	5660	15810	120	929	841	498	47	48	12	95	95	0	2237	2030	1266	62	61	17	91	91	0	0.406	0.403	0.382	0.422	1.957	0.382	0.891	120	513	3057	2762	-1.302	882	2175	794	1968	0
1	18	10	CEN14	CEN14	5840	15810	130	591	542	256	47	48	12	99	97	0	390	372	179	62	61	19	90	90	0	1.659	1.597	1.611	1.715	2.083	1.571	0.864	120	604	872	805	0.73	544	328	495	310	0
1	19	10	YORCdelta11	YORCdelta11	6050	15810	120	500	474	244	47	49	17	97	95	0	1859	1661	995	61	61	22	95	95	0	0.252	0.267	0.264	0.299	2.155	0.241	0.867	120	594	2251	2027	-1.989	453	1798	427	1600	0
1	20	10	YORWdelta16	YORWdelta16	6240	15800	110	421	389	203	48	51	18	93	88	0	679	612	381	62	63	26	86	85	0	0.605	0.62	0.596	0.704	2.284	0.552	0.841	80	502	990	891	-0.726	373	617	341	550	0
1	21	10	YOR298C-A	YOR298C-A	6450	15800	130	434	560	408	48	86	447	47	23	0	672	888	689	62	90	364	65	45	0	0.633	0.62	0.599	0.691	2.284	0.59	0.897	120	757	996	1338	-0.66	386	610	512	826	0
1	1	11	YPLCdelta10	YPLCdelta10	2450	16050	120	1092	1176	837	44	46	15	98	97	0	1603	1751	1321	58	61	83	90	84	0	0.678	0.669	0.686	0.816	2.496	0.635	0.888	120	624	2593	2825	-0.56	1048	1545	1132	1693	0
1	2	11	YPRCdelta13	YPRCdelta13	2650	16050	130	1628	1684	1153	44	47	16	99	99	0	1376	1325	930	58	60	74	90	85	0	1.202	1.294	1.324	1.376	1.896	1.281	0.899	120	636	2902	2907	0.265	1584	1318	1640	1267	0
1	3	11	SNR51	SNR51	2860	16050	120	275	280	160	45	47	13	91	85	0	714	740	519	58	59	29	88	82	0	0.351	0.345	0.333	0.381	2.439	0.307	0.85	120	585	886	917	-1.512	230	656	235	682	0
1	4	11	iYAL068C-0	iYAL068C-0	3050	16040	110	721	713	500	46	47	14	95	92	0	1366	1306	951	61	61	27	92	83	0	0.517	0.536	0.533	0.595	2.242	0.519	0.887	80	513	1980	1912	-0.951	675	1305	667	1245	0
1	5	11	iYAL067C	iYAL067C	3250	16040	120	1341	1255	744	46	48	16	97	97	0	3393	3123	2036	60	62	35	96	94	0	0.389	0.395	0.379	0.443	2.261	0.365	0.88	120	650	4628	4272	-1.364	1295	3333	1209	3063	0
1	6	11	iYAL064C-A-0	iYAL064C-A-0	3460	16040	120	3538	3315	1994	46	47	12	100	100	0	4806	4411	2857	59	59	20	99	98	0	0.736	0.751	0.724	0.853	2.384	0.723	0.891	120	608	8239	7621	-0.443	3492	4747	3269	4352	0
1	7	11	iYBR065C	iYBR065C	3660	16030	130	479	435	237	44	46	10	95	93	0	2325	2224	1369	59	59	62	93	90	0	0.192	0.181	0.175	0.192	2.171	0.165	0.866	120	619	2701	2556	-2.381	435	2266	391	2165	0
1	8	11	iYBR069C	iYBR069C	3860	16030	120	816	786	500	44	46	11	98	96	0	1875	1846	1265	60	59	20	95	94	0	0.425	0.415	0.393	0.459	2.451	0.384	0.86	120	542	2587	2528	-1.233	772	1815	742	1786	0
1	9	11	iYBR073W	iYBR073W	4060	16030	120	998	894	517	45	46	11	98	98	0	1645	1532	920	61	59	19	96	95	0	0.602	0.577	0.568	0.583	2.238	0.555	0.882	120	564	2537	2320	-0.733	953	1584	849	1471	0
1	10	11	iYBR085W-1	iYBR085W-1	4260	16030	120	1864	1731	1150	46	47	11	100	100	0	2480	2457	1728	61	59	20	94	93	0	0.752	0.703	0.716	0.792	2.283	0.67	0.862	120	589	4237	4081	-0.412	1818	2419	1685	2396	0
1	11	11	iYBR089W	iYBR089W	4460	16030	130	2755	2489	1426	46	48	12	99	99	0	5539	5157	3272	61	61	21	96	95	0	0.495	0.479	0.492	0.569	2.366	0.449	0.898	120	608	8187	7539	-1.016	2709	5478	2443	5096	0
1	12	11	iYBR093C	iYBR093C	4660	16020	120	514	497	318	47	48	11	95	90	0	1422	1457	1004	62	60	18	90	90	0	0.343	0.323	0.305	0.34	2.298	0.304	0.879	120	543	1827	1845	-1.542	467	1360	450	1395	0
1	13	11	iYBR111C	iYBR111C	4860	16020	120	5003	4679	2742	47	49	13	100	100	0	6383	5909	3678	64	62	21	96	95	0	0.784	0.792	0.801	0.899	2.096	0.775	0.896	120	526	11275	10477	-0.351	4956	6319	4632	5845	0
1	14	11	iYBR117C	iYBR117C	5050	16010	130	2415	2146	1406	49	60	45	93	91	0	5304	4907	3284	67	79	68	89	87	0	0.452	0.433	0.422	0.471	2.203	0.412	0.894	120	581	7603	6937	-1.146	2366	5237	2097	4840	0
1	15	11	iYBR121C	iYBR121C	5250	16010	130	1519	1436	848	47	57	42	96	95	0	3282	3234	2071	64	76	68	98	96	0	0.457	0.438	0.437	0.474	1.732	0.413	0.909	120	671	4690	4559	-1.128	1472	3218	1389	3170	0
1	16	11	iYBR139W	iYBR139W	5450	16010	110	1440	1557	904	48	70	153	92	87	0	946	877	508	65	91	237	80	68	0	1.58	1.858	1.787	1.973	1.762	1.713	0.758	80	536	2273	2321	0.66	1392	881	1509	812	0
1	17	11	iYBR143C	iYBR143C	5660	16010	120	777	702	407	48	66	145	81	72	0	2360	2232	1510	63	83	221	86	80	0	0.317	0.302	0.296	0.36	2.489	0.276	0.902	120	597	3026	2823	-1.656	729	2297	654	2169	0
1	18	11	iYBR147W	iYBR147W	5850	16000	110	987	910	474	47	56	84	91	88	0	2797	2521	1484	62	76	140	91	88	0	0.344	0.351	0.366	0.405	2.271	0.316	0.862	80	508	3675	3322	-1.541	940	2735	863	2459	0
1	19	11	iYDL240W	iYDL240W	6070	16010	120	1881	1939	1310	48	56	77	95	90	0	1145	1116	765	61	74	128	84	80	0	1.691	1.792	1.767	1.86	1.926	1.812	0.907	120	610	2917	2946	0.758	1833	1084	1891	1055	0
1	20	11	iYDL236W	iYDL236W	6260	15990	100	306	274	157	48	50	16	85	78	0	553	436	273	64	63	23	85	80	0	0.528	0.608	0.564	0.568	2.206	0.552	0.83	80	467	747	598	-0.922	258	489	226	372	0
1	21	11	iYDL232W	iYDL232W	6460	16000	130	1506	1514	981	46	49	13	100	98	0	998	975	643	62	61	18	95	92	0	1.56	1.608	1.608	1.797	2.099	1.605	0.898	120	692	2396	2381	0.641	1460	936	1468	913	0
1	1	12	iYDL216C	iYDL216C	2460	16250	120	175	164	74	44	45	11	90	87	0	824	805	548	56	58	55	89	83	0	0.171	0.16	0.15	0.184	2.351	0.132	0.773	120	624	899	869	-2.552	131	768	120	749	0
1	2	12	iYDL212W	iYDL212W	2650	16240	110	194	192	96	45	47	15	91	85	0	887	899	618	59	68	69	85	82	0	0.18	0.175	0.186	0.199	2.325	0.143	0.767	80	511	977	987	-2.474	149	828	147	840	0
1	3	12	itG(GCC)D1	itG(GCC)D1	2850	16240	110	722	674	358	45	48	20	96	93	0	2306	2130	1260	60	69	66	93	91	0	0.301	0.304	0.308	0.328	1.853	0.276	0.892	80	561	2923	2699	-1.73	677	2246	629	2070	0
1	4	12	iYDL195W	iYDL195W	3060	16240	120	789	736	452	45	48	19	94	92	0	1719	1559	1097	61	65	45	87	85	0	0.449	0.461	0.427	0.541	2.744	0.407	0.807	120	609	2402	2189	-1.156	744	1658	691	1498	0
1	5	12	iYDL191W	iYDL191W	3260	16240	120	968	1034	698	45	46	12	97	95	0	1025	984	697	60	60	23	90	90	0	0.956	1.07	1.086	1.158	2.324	1.038	0.853	120	528	1888	1913	-0.064	923	965	989	924	0
1	6	12	iYDL186W	iYDL186W	3440	16240	120	417	414	238	45	46	11	96	93	0	1159	1102	701	60	59	22	93	93	0	0.338	0.354	0.335	0.367	2.088	0.325	0.841	120	530	1471	1411	-1.563	372	1099	369	1042	0
1	7	12	iYDL170W	iYDL170W	3640	16230	130	430	390	198	44	45	10	98	95	0	800	695	382	60	58	21	95	94	0	0.522	0.545	0.512	0.574	2.081	0.515	0.883	120	605	1126	981	-0.939	386	740	346	635	0
1	8	12	iYDL166C	iYDL166C	3830	16230	120	137	148	80	45	46	10	91	82	0	284	359	247	61	59	19	91	87	0	0.413	0.346	0.35	0.387	2.434	0.303	0.782	120	570	315	401	-1.277	92	223	103	298	0
1	9	12	iYDL160C	iYDL160C	4030	16240	120	825	818	451	44	46	10	100	99	0	2011	1835	1121	60	59	19	97	96	0	0.4	0.436	0.435	0.533	2.276	0.407	0.894	120	577	2732	2549	-1.321	781	1951	774	1775	0
1	10	12	iYDR141C	iYDR141C	4240	16230	120	315	313	181	45	46	11	92	91	0	1880	1964	1496	60	59	23	90	90	0	0.148	0.141	0.138	0.169	2.343	0.119	0.836	120	595	2090	2172	-2.753	270	1820	268	1904	0
1	11	12	iYDR145W	iYDR145W	4440	16220	110	208	188	80	46	47	11	91	88	0	489	424	218	61	61	31	87	82	0	0.379	0.391	0.387	0.41	1.86	0.343	0.793	80	500	590	505	-1.402	162	428	142	363	0
1	12	12	iYDR150W	iYDR150W	4630	16220	130	3356	3459	2114	47	48	12	100	100	0	2710	2310	1448	63	62	25	95	95	0	1.25	1.518	1.493	1.619	2.08	1.516	0.916	120	630	5956	5659	0.322	3309	2647	3412	2247	0
1	13	12	iYDR169C-0	iYDR169C-0	4840	16220	120	744	741	466	47	49	12	94	93	0	2438	2462	1701	64	64	26	89	87	0	0.294	0.289	0.28	0.334	2.475	0.262	0.844	120	574	3071	3092	-1.768	697	2374	694	2398	0
1	14	12	iYDR170W-A-0	iYDR170W-A-0	5040	16220	120	13398	12288	8167	49	58	41	100	100	0	18133	16754	11136	65	77	61	99	98	0	0.739	0.733	0.738	0.803	2.115	0.72	0.889	120	574	31417	28928	-0.437	13349	18068	12239	16689	0
1	15	12	iYDR173C	iYDR173C	5240	16210	120	372	368	217	48	54	32	87	80	0	1856	2016	1480	63	71	57	89	88	0	0.181	0.164	0.163	0.186	2.27	0.147	0.869	120	579	2117	2273	-2.468	324	1793	320	1953	0
1	16	12	iYDR189W	iYDR189W	5440	16220	120	1520	1564	922	48	64	141	94	90	0	1431	1443	888	63	85	221	82	77	0	1.076	1.099	1.112	1.226	2.132	1.079	0.9	120	613	2840	2896	0.106	1472	1368	1516	1380	0
1	17	12	iYDR194C	iYDR194C	5640	16210	120	778	778	423	47	59	117	90	85	0	2154	2160	1279	62	71	169	92	87	0	0.349	0.348	0.35	0.371	1.981	0.323	0.865	120	562	2823	2829	-1.517	731	2092	731	2098	0
1	18	12	iYDR198C	iYDR198C	5840	16200	130	777	678	387	46	55	76	90	85	0	1306	1178	691	62	70	102	89	85	0	0.588	0.566	0.554	0.603	2.284	0.545	0.876	120	634	1975	1748	-0.767	731	1244	632	1116	0
1	19	12	iYDR214W	iYDR214W	6040	16210	120	219	216	93	47	50	18	93	86	0	506	495	285	60	63	30	89	86	0	0.386	0.389	0.394	0.446	2.349	0.341	0.833	120	549	618	604	-1.375	172	446	169	435	0
1	20	12	iYDR218C	iYDR218C	6240	16200	120	953	868	483	47	48	11	99	99	0	2444	2133	1288	61	60	19	98	97	0	0.38	0.396	0.393	0.413	2.035	0.37	0.889	120	603	3289	2893	-1.395	906	2383	821	2072	0
1	21	12	iYDR223W	iYDR223W	6450	16200	120	671	656	382	46	48	11	98	95	0	2186	1917	1200	61	60	19	95	93	0	0.294	0.329	0.321	0.357	2.175	0.307	0.87	120	628	2750	2466	-1.766	625	2125	610	1856	0
1	1	13	iYDR532C	iYDR532C	2440	16430	110	214	220	137	45	45	10	87	86	0	476	443	322	56	54	21	81	75	0	0.402	0.452	0.469	0.53	2.534	0.331	0.654	80	557	589	562	-1.313	169	420	175	387	0
1	2	13	iYDR535C	iYDR535C	2650	16450	120	851	854	516	44	46	13	98	95	0	3361	3330	2119	58	62	48	92	91	0	0.244	0.248	0.244	0.258	2.293	0.234	0.897	120	675	4110	4082	-2.033	807	3303	810	3272	0
1	3	13	iYDR539W-1	iYDR539W-1	2870	16460	90	218	215	117	44	46	15	86	84	0	414	429	312	56	60	41	82	76	0	0.486	0.458	0.442	0.472	1.853	0.39	0.878	52	373	532	544	-1.041	174	358	171	373	0
1	4	13	iYEL073C-4	iYEL073C-4	3050	16440	120	207	268	212	43	44	10	86	80	0	522	707	692	56	55	19	76	75	0	0.352	0.346	0.336	0.374	2.171	0.307	0.886	120	582	630	876	-1.507	164	466	225	651	0
1	5	13	iYEL071W-1	iYEL071W-1	3250	16440	130	437	609	557	45	61	233	56	46	0	839	1490	1531	59	66	113	69	65	0	0.503	0.394	0.373	0.446	2.989	0.389	0.661	120	615	1172	1995	-0.993	392	780	564	1431	0
1	6	13	iYEL068C	iYEL068C	3450	16440	130	731	1065	1137	46	65	234	64	55	0	377	925	1032	59	72	136	56	51	0	2.154	1.177	1.015	1.208	3.468	1.203	0.696	120	650	1003	1885	1.107	685	318	1019	866	0
1	7	13	iYEL051W	iYEL051W	3660	16420	110	1892	1608	1081	46	60	102	88	81	0	1256	1306	900	60	70	97	86	82	0	1.543	1.254	1.193	1.143	2.17	1.241	0.896	80	548	3042	2808	0.626	1846	1196	1562	1246	0
1	8	13	itG(GCC)E	itG(GCC)E	3860	16430	100	164	179	94	45	50	55	77	52	0	661	670	458	60	63	44	81	78	0	0.198	0.22	0.224	0.235	2.368	0.202	0.823	80	465	720	744	-2.336	119	601	134	610	0
1	9	13	iYEL047C	iYEL047C	4050	16430	120	1193	1151	759	44	46	11	98	97	0	2006	2240	1608	60	59	26	95	93	0	0.59	0.508	0.507	0.58	2.135	0.48	0.924	120	564	3095	3287	-0.76	1149	1946	1107	2180	0
1	10	13	iYEL029C	iYEL029C	4260	16430	130	1499	1530	1049	45	47	12	95	95	0	4499	3969	2946	60	60	29	93	93	0	0.328	0.38	0.388	0.448	2.134	0.359	0.922	120	646	5893	5394	-1.61	1454	4439	1485	3909	0
1	11	13	iYEL027W	iYEL027W	4470	16430	120	2643	2814	1960	45	47	12	100	99	0	2330	2162	1518	62	64	38	95	92	0	1.146	1.319	1.36	1.486	1.948	1.322	0.919	120	591	4866	4869	0.196	2598	2268	2769	2100	0
1	12	13	iYEL023C	iYEL023C	4660	16420	120	348	335	213	45	47	11	91	88	0	3087	3082	2254	61	60	20	94	92	0	0.1	0.096	0.095	0.115	2.302	0.09	0.891	120	532	3329	3311	-3.32	303	3026	290	3021	0
1	13	13	iYFL031W	iYFL031W	4860	16420	120	930	776	437	45	46	10	99	98	0	2695	2274	1280	61	62	30	97	94	0	0.336	0.33	0.324	0.338	1.835	0.322	0.92	120	558	3519	2944	-1.574	885	2634	731	2213	0
1	14	13	iYFL027C	iYFL027C	5060	16420	120	1494	1325	718	46	47	10	100	100	0	2915	2437	1275	61	60	28	98	98	0	0.507	0.538	0.533	0.525	1.464	0.536	0.945	120	552	4302	3655	-0.979	1448	2854	1279	2376	0
1	15	13	iYFL023W	iYFL023W	5240	16410	110	865	824	543	49	56	62	85	81	0	912	1034	766	63	75	94	81	77	0	0.961	0.798	0.771	0.819	2.495	0.715	0.93	80	523	1665	1746	-0.057	816	849	775	971	0
1	16	13	iYFL009W	iYFL009W	5470	16420	110	148	142	67	47	51	30	76	67	0	336	300	179	63	70	71	76	68	0	0.37	0.401	0.37	0.361	2.259	0.347	0.785	80	523	374	332	-1.435	101	273	95	237	0
1	17	13	iYFL005W	iYFL005W	5660	16410	130	2078	1822	904	46	48	12	100	99	0	2779	2387	1243	61	60	18	99	98	0	0.748	0.764	0.766	0.824	1.724	0.744	0.928	120	592	4750	4102	-0.42	2032	2718	1776	2326	0
1	18	13	iYFLWdelta5	iYFLWdelta5	5850	16400	130	1023	995	642	46	50	19	96	94	0	1153	996	673	61	68	125	85	75	0	0.895	1.015	0.994	1.054	1.893	0.958	0.836	120	631	2069	1884	-0.161	977	1092	949	935	0
1	19	13	iYFR009W	iYFR009W	6060	16400	130	925	851	495	46	49	13	96	95	0	1602	1478	851	61	62	35	96	94	0	0.57	0.568	0.544	0.601	1.959	0.559	0.911	120	615	2420	2222	-0.81	879	1541	805	1417	0
1	20	13	iYFR012W	iYFR012W	6260	16400	120	2341	2258	1491	46	48	12	99	98	0	4210	4027	2606	62	63	36	95	93	0	0.553	0.558	0.559	0.636	2.1	0.548	0.923	120	559	6443	6177	-0.854	2295	4148	2212	3965	0
1	21	13	iYFR016C	iYFR016C	6460	16400	120	220	225	134	47	48	11	96	93	0	1577	1494	829	62	67	87	92	89	0	0.114	0.124	0.121	0.138	2.293	0.117	0.725	120	619	1688	1610	-3.13	173	1515	178	1432	0
1	1	14	iYFR027W	iYFR027W	2460	16650	120	796	760	467	44	45	12	95	95	0	2089	1928	1356	58	56	20	92	90	0	0.37	0.383	0.375	0.447	2.564	0.338	0.809	120	682	2783	2586	-1.433	752	2031	716	1870	0
1	2	14	iYFR030W	iYFR030W	2670	16650	120	379	348	171	44	46	11	96	95	0	291	272	132	59	56	18	87	84	0	1.444	1.427	1.36	1.354	2.063	1.411	0.791	120	559	567	517	0.53	335	232	304	213	0
1	3	14	iYFR032C-A	iYFR032C-A	2870	16640	130	351	326	177	44	45	10	95	90	0	2575	2184	1355	57	56	18	97	96	0	0.122	0.133	0.133	0.142	2.245	0.122	0.849	120	610	2825	2409	-3.036	307	2518	282	2127	0
1	4	14	iYGL002W	iYGL002W	3060	16650	120	2530	2341	1413	43	45	10	99	99	0	1681	1545	1051	57	55	19	92	92	0	1.531	1.544	1.498	1.74	2.321	1.515	0.837	120	558	4111	3786	0.615	2487	1624	2298	1488	0
1	5	14	iYGR002C	iYGR002C	3270	16640	130	917	789	463	45	46	11	97	94	0	1304	1169	718	58	57	20	89	88	0	0.7	0.67	0.649	0.688	2.208	0.637	0.872	120	615	2118	1855	-0.515	872	1246	744	1111	0
1	6	14	iYGR006W	iYGR006W	3460	16640	130	1674	1560	926	46	47	13	98	98	0	2884	2477	1539	59	60	38	95	94	0	0.576	0.626	0.65	0.681	2.312	0.591	0.844	120	615	4453	3932	-0.795	1628	2825	1514	2418	0
1	7	14	iYGR026W	iYGR026W	3670	16640	120	553	533	319	46	54	75	86	80	0	1229	1103	740	59	65	85	87	85	0	0.433	0.466	0.475	0.47	2.35	0.409	0.744	120	600	1677	1531	-1.206	507	1170	487	1044	0
1	8	14	iYGR028W	iYGR028W	3870	16630	120	1146	1092	647	44	45	11	100	99	0	1746	1570	936	58	61	66	94	89	0	0.653	0.693	0.688	0.72	2.345	0.665	0.838	120	578	2790	2560	-0.615	1102	1688	1048	1512	0
1	9	14	iYGR030C	iYGR030C	4060	16630	120	336	312	160	44	46	11	92	91	0	1741	1476	881	59	59	27	93	90	0	0.174	0.189	0.189	0.204	1.868	0.171	0.872	120	531	1974	1685	-2.526	292	1682	268	1417	0
1	10	14	iYGR043C-0	iYGR043C-0	4260	16630	120	310	297	192	44	46	11	90	89	0	1076	1086	803	59	62	49	93	87	0	0.262	0.246	0.255	0.252	2.31	0.221	0.793	120	569	1283	1280	-1.935	266	1017	253	1027	0
1	11	14	iYGR047C	iYGR047C	4470	16630	130	1024	1013	754	45	47	13	90	86	0	2174	2148	1768	61	66	88	78	75	0	0.463	0.464	0.44	0.511	2.378	0.419	0.84	120	615	3092	3055	-1.11	979	2113	968	2087	0
1	12	14	iYGR051C	iYGR051C	4660	16610	130	98	166	145	44	47	14	69	60	0	673	1150	1142	63	68	82	70	60	0	0.089	0.112	0.11	0.12	2.761	0.104	0.771	120	613	664	1209	-3.498	54	610	122	1087	0
1	13	14	iYGR067C	iYGR067C	4860	16620	130	209	278	235	44	46	12	84	77	0	525	983	1006	62	63	33	75	71	0	0.356	0.254	0.244	0.261	2.761	0.202	0.702	120	631	628	1155	-1.489	165	463	234	921	0
1	14	14	iYGR072W	iYGR072W	5070	16620	120	182	178	91	46	47	11	90	85	0	298	296	161	61	59	21	87	83	0	0.574	0.562	0.544	0.548	2.21	0.512	0.762	120	574	373	367	-0.801	136	237	132	235	0
1	15	14	iYGR078C	iYGR078C	5270	16610	120	340	377	241	47	59	94	77	68	0	837	910	617	62	76	173	80	73	0	0.378	0.389	0.391	0.389	2.17	0.364	0.846	120	596	1068	1178	-1.403	293	775	330	848	0
1	16	14	iYHR009C	iYHR009C	5470	16610	130	664	617	357	46	69	295	70	50	0	3039	2641	1661	62	82	284	86	80	0	0.208	0.221	0.219	0.247	2.564	0.206	0.883	120	637	3595	3150	-2.268	618	2977	571	2579	0
1	17	14	iYHR013C	iYHR013C	5670	16600	130	1107	998	641	46	48	15	94	90	0	1926	1807	1269	62	63	45	89	88	0	0.569	0.546	0.516	0.576	1.998	0.504	0.869	120	615	2925	2697	-0.813	1061	1864	952	1745	0
1	18	14	iYHRWdelta7	iYHRWdelta7	5870	16610	130	1058	949	556	46	48	15	96	95	0	1257	1102	663	61	67	123	85	78	0	0.846	0.867	0.84	0.889	1.857	0.817	0.817	120	647	2208	1944	-0.241	1012	1196	903	1041	0
1	19	14	iYHR027C	iYHR027C	6070	16600	130	230	229	117	46	47	11	95	90	0	1118	1069	669	61	61	25	90	90	0	0.174	0.182	0.177	0.194	2.098	0.166	0.86	120	630	1241	1191	-2.522	184	1057	183	1008	0
1	20	14	iYHR031C	iYHR031C	6270	16600	120	360	339	188	47	49	11	93	90	0	1118	1041	635	62	63	27	90	88	0	0.296	0.298	0.293	0.325	2.556	0.278	0.861	120	587	1369	1271	-1.754	313	1056	292	979	0
1	21	14	iYHR035W	iYHR035W	6480	16610	130	494	474	245	46	47	10	99	98	0	1878	1737	1006	62	62	20	98	97	0	0.247	0.256	0.254	0.273	1.807	0.23	0.882	120	714	2264	2103	-2.019	448	1816	428	1675	0
1	1	15	iYHR048W	iYHR048W	2480	16850	120	448	418	224	44	45	13	95	94	0	942	881	520	59	59	55	89	85	0	0.458	0.455	0.447	0.504	2.389	0.427	0.888	120	612	1287	1196	-1.128	404	883	374	822	0
1	2	15	iYHR052W	iYHR052W	2670	16840	130	1378	1315	752	44	45	13	100	99	0	1520	1382	804	60	60	55	95	93	0	0.914	0.961	0.963	1.021	1.861	0.954	0.886	120	597	2794	2593	-0.13	1334	1460	1271	1322	0
1	3	15	iYHR056C	iYHR056C	2870	16840	120	495	475	214	44	45	11	99	96	0	4018	3710	1711	58	57	19	100	100	0	0.114	0.118	0.117	0.11	1.758	0.113	0.902	120	571	4411	4083	-3.134	451	3960	431	3652	0
1	4	15	itF(GAA)H1	itF(GAA)H1	3070	16840	130	2518	2010	1059	45	46	12	100	99	0	6093	5162	3045	60	60	30	98	97	0	0.41	0.385	0.372	0.446	2.001	0.353	0.896	120	629	8506	7067	-1.287	2473	6033	1965	5102	0
1	5	15	iYHR075C	iYHR075C	3280	16840	130	2207	1894	1016	45	47	12	100	100	0	6998	5780	3303	60	62	36	100	96	0	0.312	0.323	0.316	0.36	1.878	0.306	0.901	120	631	9100	7569	-1.682	2162	6938	1849	5720	0
1	6	15	iYHR079C	iYHR079C	3480	16840	130	1412	1262	704	45	46	11	98	96	0	3771	3519	2182	61	60	28	95	95	0	0.368	0.352	0.346	0.378	1.904	0.328	0.898	120	631	5077	4675	-1.44	1367	3710	1217	3458	0
1	7	15	iYIL013C	iYIL013C	3680	16830	130	1070	1013	650	45	47	15	94	91	0	3788	3140	2155	62	66	74	89	87	0	0.275	0.314	0.329	0.369	2.935	0.296	0.869	120	615	4751	4046	-1.862	1025	3726	968	3078	0
1	8	15	iYIL009C-A	iYIL009C-A	3880	16840	130	605	525	282	45	47	16	95	95	0	1196	1043	622	62	65	47	91	88	0	0.494	0.489	0.467	0.527	2.081	0.457	0.889	120	613	1694	1461	-1.018	560	1134	480	981	0
1	9	15	iYIL009W	iYIL009W	4090	16830	140	3218	2887	1939	44	47	30	96	94	0	2998	2669	1896	61	64	68	87	87	0	1.081	1.09	1.068	1.199	2.365	1.065	0.893	156	619	6111	5451	0.112	3174	2937	2843	2608	0
1	10	15	itE(UUC)I	itE(UUC)I	4280	16830	120	339	310	168	44	45	10	91	88	0	1110	917	562	61	61	34	87	85	0	0.281	0.311	0.297	0.317	2.158	0.287	0.869	120	518	1344	1122	-1.83	295	1049	266	856	0
1	11	15	iYIR010W	iYIR010W	4480	16830	120	1068	974	575	45	46	10	99	98	0	775	709	409	61	60	33	89	86	0	1.433	1.434	1.36	1.423	2.255	1.449	0.879	120	577	1737	1577	0.519	1023	714	929	648	0
1	12	15	iYIR014W	iYIR014W	4690	16830	120	521	475	261	44	45	10	95	95	0	1556	1337	870	61	62	30	90	85	0	0.319	0.338	0.326	0.373	2.099	0.307	0.885	120	589	1972	1707	-1.648	477	1495	431	1276	0
1	13	15	iYIR026C	iYIR026C	4880	16820	120	785	733	448	44	45	11	97	94	0	1532	1350	893	62	60	20	94	93	0	0.504	0.535	0.506	0.534	2.029	0.503	0.881	120	580	2211	1977	-0.988	741	1470	689	1288	0
1	14	15	iYIR030C	iYIR030C	5090	16820	120	1158	961	585	45	47	13	96	94	0	2364	2142	1455	62	61	21	91	90	0	0.483	0.44	0.422	0.488	2.328	0.41	0.908	120	580	3415	2996	-1.048	1113	2302	916	2080	0
1	15	15	iYIR034C	iYIR034C	5290	16820	130	2248	2026	1293	46	75	322	83	73	0	2301	2012	1430	62	84	301	80	72	0	0.983	1.015	0.97	1.161	2.36	0.979	0.855	120	536	4441	3930	-0.024	2202	2239	1980	1950	0
1	16	15	iYJL223C-0	iYJL223C-0	5470	16820	120	6904	6651	4986	48	79	338	85	83	0	9817	11930	9739	62	92	328	85	81	0	0.703	0.556	0.582	0.674	2.182	0.521	0.88	120	489	16611	18471	-0.509	6856	9755	6603	11868	0
1	17	15	iYJL219W	iYJL219W	5670	16810	130	1540	1463	1033	46	49	26	94	89	0	3711	3638	2666	62	66	52	85	84	0	0.409	0.396	0.388	0.473	2.846	0.381	0.877	120	590	5143	4993	-1.288	1494	3649	1417	3576	0
1	18	15	iYJL215C	iYJL215C	5870	16820	120	1003	925	528	46	47	10	95	95	0	1913	1900	1258	65	62	18	94	93	0	0.518	0.479	0.448	0.543	2.243	0.44	0.907	120	527	2805	2714	-0.949	957	1848	879	1835	0
1	19	15	iYJR093C	iYJR093C	6070	16810	120	800	1143	951	45	47	10	100	100	0	1656	2586	2347	63	62	23	98	95	0	0.474	0.435	0.442	0.494	1.86	0.404	0.905	120	513	2348	3621	-1.077	755	1593	1098	2523	0
1	20	15	iYJR095W	iYJR095W	6260	16810	130	2102	1986	1183	46	48	11	98	96	0	3677	3465	2393	63	61	18	95	94	0	0.569	0.57	0.576	0.702	2.127	0.53	0.929	120	568	5670	5342	-0.814	2056	3614	1940	3402	0
1	21	15	iYJR099W	iYJR099W	6460	16810	110	631	620	325	47	48	11	96	96	0	1551	1593	1061	63	61	21	90	90	0	0.392	0.375	0.359	0.456	2.471	0.322	0.877	80	544	2072	2103	-1.349	584	1488	573	1530	0
1	1	16	iYJR115W	iYJR115W	2460	17050	130	599	584	332	44	45	12	95	95	0	3187	2805	1800	60	60	51	92	90	0	0.177	0.197	0.201	0.243	2.897	0.172	0.81	120	716	3682	3285	-2.494	555	3127	540	2745	0
1	2	16	iYJR119C	iYJR119C	2670	17050	120	522	588	396	43	45	12	97	95	0	2029	2192	1586	60	61	56	93	89	0	0.243	0.256	0.255	0.283	2.922	0.23	0.81	120	579	2448	2677	-2.039	479	1969	545	2132	0
1	3	16	iYJR123W	iYJR123W	2860	17050	120	1935	1897	1214	44	49	57	94	89	0	1273	1179	814	60	67	134	78	75	0	1.559	1.656	1.661	1.964	2.619	1.641	0.855	120	593	3104	2972	0.641	1891	1213	1853	1119	0
1	4	16	iYJR140C	iYJR140C	3070	17050	130	436	425	205	44	46	12	97	95	0	1820	1745	1101	60	62	40	95	91	0	0.223	0.226	0.225	0.272	2.4	0.195	0.843	120	623	2152	2066	-2.167	392	1760	381	1685	0
1	5	16	iYJR144W	iYJR144W	3260	17040	130	1796	1673	993	46	49	23	95	94	0	2535	2323	1522	62	65	43	92	90	0	0.708	0.72	0.685	0.767	2.351	0.673	0.862	120	609	4223	3888	-0.499	1750	2473	1627	2261	0
1	6	16	iYJR149W	iYJR149W	3470	17050	130	1332	1237	652	46	49	22	99	98	0	2798	2453	1333	62	65	43	94	94	0	0.47	0.498	0.469	0.545	2.054	0.467	0.871	120	614	4022	3582	-1.089	1286	2736	1191	2391	0
1	7	16	iYJR159W	iYJR159W	3670	17040	130	822	708	349	47	49	15	97	95	0	4599	3925	2123	62	63	42	94	94	0	0.171	0.171	0.17	0.195	2.348	0.159	0.873	120	613	5312	4524	-2.549	775	4537	661	3863	0
1	8	16	iYKL225W	iYKL225W	3870	17030	130	21539	17673	10227	47	65	144	97	95	0	19422	15965	9531	64	77	144	95	93	0	1.11	1.108	1.119	1.225	2.281	1.095	0.886	120	613	40850	33527	0.151	21492	19358	17626	15901	0
1	9	16	iYKL221W-0	iYKL221W-0	4080	17040	130	3038	2619	1277	46	68	164	95	90	0	3739	3221	1679	61	81	165	90	90	0	0.813	0.814	0.816	0.911	2.183	0.791	0.87	120	474	6670	5733	-0.298	2992	3678	2573	3160	-100
1	10	16	iYKR062W	iYKR062W	4190	17030	150	791	825	695	45	49	34	87	84	0	1358	1368	1097	61	64	69	87	81	0	0.575	0.597	0.556	0.57	2.262	0.553	0.867	156	595	2043	2087	-0.798	746	1297	780	1307	-100
1	11	16	iYKR066C	iYKR066C	4380	17040	130	587	513	257	45	46	10	99	96	0	4240	3541	1897	62	59	18	99	97	0	0.13	0.135	0.135	0.145	2.151	0.127	0.881	120	560	4720	3947	-2.946	542	4178	468	3479	0
1	12	16	iYKR070W	iYKR070W	4570	17030	130	2075	1792	940	45	46	10	100	100	0	2343	2073	1130	61	58	17	99	99	0	0.89	0.868	0.866	0.924	1.991	0.841	0.912	120	626	4312	3759	-0.169	2030	2282	1747	2012	0
1	13	16	iYKR084C	iYKR084C	4770	17030	130	971	828	411	45	47	11	98	97	0	3774	3211	1841	61	59	18	98	97	0	0.249	0.249	0.25	0.29	2.074	0.227	0.892	120	642	4639	3933	-2.004	926	3713	783	3150	0
1	14	16	iYKR088C	iYKR088C	4970	17030	130	1475	1303	622	46	47	11	100	99	0	1715	1559	842	63	62	32	98	91	0	0.865	0.84	0.83	1.001	2.146	0.799	0.902	120	652	3081	2753	-0.209	1429	1652	1257	1496	0
1	15	16	iYKR092C-0	iYKR092C-0	5190	17020	140	682	636	375	45	47	11	96	92	0	4148	3658	2423	62	62	32	97	96	0	0.156	0.164	0.162	0.178	2.146	0.153	0.909	156	650	4723	4187	-2.681	637	4086	591	3596	0
1	16	16	iYKR103W	iYKR103W	5380	17010	140	848	826	593	47	48	11	95	92	0	1424	1767	1427	61	59	17	91	88	0	0.588	0.457	0.443	0.537	2.547	0.421	0.904	156	566	2164	2485	-0.767	801	1363	779	1706	0
1	17	16	iYKR106W-1	iYKR106W-1	5580	17010	140	5422	4919	3119	48	49	11	98	96	0	7366	6749	4381	60	60	18	97	95	0	0.736	0.728	0.711	0.758	2.064	0.713	0.931	156	604	12680	11560	-0.443	5374	7306	4871	6689	0
1	18	16	iYLL066C-1	iYLL066C-1	5780	17010	140	11651	13715	11091	48	48	10	98	97	0	12582	16819	14200	62	62	18	98	96	0	0.927	0.816	0.848	0.896	2.274	0.789	0.898	156	629	24123	30424	-0.11	11603	12520	13667	16757	0
1	19	16	iYLL050C	iYLL050C	5990	17010	140	1103	1082	712	46	47	10	96	94	0	2552	2642	1998	62	61	17	95	94	0	0.424	0.402	0.412	0.48	2.165	0.367	0.9	156	608	3547	3616	-1.236	1057	2490	1036	2580	0
1	20	16	iYLL044W	iYLL044W	6180	17000	140	467	440	265	46	48	16	91	87	0	4797	4176	2855	61	60	17	96	92	0	0.089	0.096	0.095	0.116	2.692	0.09	0.912	156	565	5157	4509	-3.492	421	4736	394	4115	0
1	21	16	iYLL040C	iYLL040C	6380	17000	140	387	818	845	46	48	16	87	82	0	838	1930	2259	61	61	45	78	73	0	0.439	0.413	0.409	0.478	2.977	0.348	0.758	156	767	1118	2641	-1.188	341	777	772	1869	0
1	1	17	iYLR267W	iYLR267W	2380	17250	130	788	729	384	45	46	11	99	98	0	2306	2007	1169	60	59	27	100	100	0	0.331	0.351	0.332	0.352	1.922	0.332	0.909	120	609	2989	2631	-1.596	743	2246	684	1947	0
1	2	17	itV(AAC)L	itV(AAC)L	2600	17250	120	761	694	369	43	45	13	100	99	0	1393	1241	656	60	61	33	96	96	0	0.539	0.551	0.525	0.538	1.654	0.538	0.892	120	627	2051	1832	-0.893	718	1333	651	1181	0
1	3	17	iYLR275W	iYLR275W	2790	17250	110	811	767	297	44	50	60	100	100	0	1010	950	386	61	69	138	96	88	0	0.808	0.813	0.815	0.861	1.687	0.772	0.843	80	535	1716	1612	-0.307	767	949	723	889	0
1	4	17	iYLR293C	iYLR293C	2990	17240	110	278	275	82	45	51	60	96	86	0	1809	1606	599	62	71	138	98	96	0	0.133	0.149	0.145	0.155	1.648	0.137	0.845	80	555	1980	1774	-2.906	233	1747	230	1544	0
1	5	17	iYLR298C	iYLR298C	3200	17240	120	388	342	154	46	47	19	100	93	0	3930	3457	1781	61	61	27	100	100	0	0.088	0.087	0.085	0.09	1.727	0.081	0.862	120	596	4211	3692	-3.5	342	3869	296	3396	0
1	6	17	iYLRCdelta18	iYLRCdelta18	3400	17240	120	418	390	201	45	48	23	94	90	0	940	877	481	62	62	37	95	92	0	0.425	0.423	0.414	0.428	1.904	0.4	0.88	120	567	1251	1160	-1.235	373	878	345	815	0
1	7	17	iYLR318W	iYLR318W	3600	17240	130	933	843	403	46	47	14	97	95	0	1507	1335	656	61	60	21	92	91	0	0.613	0.626	0.63	0.657	1.685	0.617	0.916	120	614	2333	2071	-0.705	887	1446	797	1274	0
1	8	17	iYLR323C	iYLR323C	3800	17230	120	1053	923	443	45	51	75	94	89	0	2608	2212	1061	61	60	19	96	95	0	0.396	0.408	0.409	0.41	1.538	0.403	0.899	120	596	3555	3029	-1.337	1008	2547	878	2151	0
1	9	17	iYLR327C	iYLR327C	4010	17230	130	545	505	249	46	59	139	81	71	0	4445	3850	2142	61	75	167	92	91	0	0.114	0.121	0.121	0.14	2.157	0.113	0.898	120	630	4883	4248	-3.135	499	4384	459	3789	0
1	10	17	iYLR338W	iYLR338W	4210	17220	130	330	313	153	45	46	10	90	89	0	1769	1461	798	61	63	115	88	87	0	0.167	0.191	0.191	0.19	1.752	0.176	0.858	120	570	1993	1668	-2.583	285	1708	268	1400	0
1	11	17	iYLR343W	iYLR343W	4410	17240	130	1116	957	477	46	47	15	97	95	0	2413	2060	1138	62	63	31	95	94	0	0.455	0.456	0.459	0.492	1.814	0.427	0.912	120	601	3421	2909	-1.136	1070	2351	911	1998	0
1	12	17	iYLR345W	iYLR345W	4610	17250	120	1465	1294	657	46	48	16	96	96	0	2011	1811	1053	62	61	30	91	90	0	0.728	0.714	0.7	0.825	2.118	0.67	0.917	120	576	3368	2997	-0.458	1419	1949	1248	1749	0
1	13	17	iYMR044W	iYMR044W	4810	17250	120	2177	1976	1098	46	48	11	100	100	0	2267	1988	1160	62	60	18	98	97	0	0.966	1.002	0.999	1.139	1.914	0.974	0.918	120	560	4336	3856	-0.049	2131	2205	1930	1926	0
1	14	17	iYMR048W	iYMR048W	5010	17230	120	1197	1088	591	45	47	10	99	98	0	1159	1090	626	62	62	28	97	92	0	1.05	1.015	0.998	1.085	1.781	0.987	0.911	120	569	2249	2071	0.071	1152	1097	1043	1028	0
1	15	17	iYMRCdelta10	iYMRCdelta10	5220	17240	140	366	1169	2552	46	53	65	82	73	0	383	619	732	62	63	31	92	89	0	0.997	2.016	0.954	1.043	2.541	3.458	0.61	156	649	641	1680	-0.005	320	321	1123	557	-100
1	16	17	iYMR067C	iYMR067C	5410	17230	120	937	853	390	47	56	71	93	90	0	2881	2486	1216	62	63	33	97	95	0	0.316	0.333	0.334	0.368	1.958	0.313	0.869	120	531	3709	3230	-1.663	890	2819	806	2424	0
1	17	17	iYMR071C	iYMR071C	5610	17220	130	349	319	135	47	48	10	98	97	0	1640	1404	731	62	61	18	99	97	0	0.191	0.203	0.198	0.227	1.866	0.188	0.89	120	612	1880	1614	-2.385	302	1578	272	1342	0
1	18	17	iYMR075C-A	iYMR075C-A	5810	17230	120	1122	973	483	47	48	10	100	100	0	1439	1258	688	60	60	19	96	94	0	0.78	0.773	0.766	0.888	1.997	0.728	0.916	120	561	2454	2124	-0.359	1075	1379	926	1198	0
1	19	17	iYMR090W	iYMR090W	6010	17220	120	482	485	267	46	47	10	97	96	0	1091	1111	647	60	59	18	95	95	0	0.423	0.418	0.409	0.423	2.071	0.399	0.893	120	566	1467	1490	-1.242	436	1031	439	1051	0
1	20	17	iYMR095C	iYMR095C	6210	17210	120	553	487	240	46	49	18	100	97	0	1654	1531	836	61	60	21	98	98	0	0.318	0.3	0.301	0.32	1.819	0.283	0.911	120	584	2100	1911	-1.652	507	1593	441	1470	0
1	21	17	iYMRCdelta13	iYMRCdelta13	6410	17210	110	328	305	128	47	49	19	98	96	0	690	599	299	62	64	57	93	87	0	0.447	0.48	0.484	0.521	1.633	0.426	0.838	80	552	909	795	-1.16	281	628	258	537	0
1	1	18	iYMR111C	iYMR111C	2420	17470	130	826	749	399	44	45	11	99	98	0	2737	2622	1615	60	60	38	98	97	0	0.292	0.275	0.274	0.305	1.863	0.253	0.908	120	647	3459	3267	-1.775	782	2677	705	2562	0
1	2	18	iYMR115W	iYMR115W	2620	17470	120	94	96	36	43	46	14	85	75	0	174	183	85	61	61	27	84	79	0	0.451	0.434	0.398	0.45	2.362	0.352	0.585	120	575	164	175	-1.148	51	113	53	122	0
1	3	18	iYMRWdelta16	iYMRWdelta16	2820	17460	120	1190	1112	629	45	46	11	100	100	0	2103	2013	1226	61	59	19	99	97	0	0.561	0.547	0.54	0.613	2.146	0.521	0.865	120	609	3187	3019	-0.835	1145	2042	1067	1952	0
1	4	18	iYNL258C	iYNL258C	3030	17450	130	807	732	334	46	47	12	98	98	0	2580	2147	1129	61	62	66	93	92	0	0.302	0.329	0.331	0.391	2.082	0.299	0.883	120	684	3280	2772	-1.727	761	2519	686	2086	0
1	5	18	iYNL254C	iYNL254C	3230	17450	130	1244	1114	581	45	46	13	99	99	0	3772	3195	1855	61	59	20	100	100	0	0.323	0.341	0.338	0.364	1.773	0.324	0.905	120	596	4910	4203	-1.63	1199	3711	1069	3134	0
1	6	18	iYNL249C	iYNL249C	3420	17450	130	468	472	235	45	47	14	97	95	0	1020	906	494	62	61	21	95	95	0	0.442	0.506	0.512	0.551	1.848	0.481	0.906	120	613	1381	1271	-1.179	423	958	427	844	0
1	7	18	iYNL231C	iYNL231C	3630	17450	120	335	311	151	45	47	15	95	90	0	1410	1280	705	61	62	33	93	91	0	0.215	0.218	0.215	0.238	2.206	0.205	0.859	120	592	1639	1485	-2.218	290	1349	266	1219	0
1	8	18	iYNL225C	iYNL225C	3830	17450	120	249	239	112	44	46	10	95	90	0	1182	1037	557	60	60	31	93	92	0	0.183	0.2	0.189	0.204	1.964	0.187	0.862	120	575	1327	1172	-2.452	205	1122	195	977	0
1	9	18	iYNL221C	iYNL221C	4030	17440	130	1045	912	488	44	46	11	97	96	0	4690	3982	2229	60	61	49	95	93	0	0.216	0.221	0.229	0.234	2.118	0.212	0.891	120	632	5631	4790	-2.21	1001	4630	868	3922	0
1	10	18	iYNL202W	iYNL202W	4230	17440	130	600	567	298	45	46	15	98	95	0	817	711	410	61	61	49	90	85	0	0.734	0.803	0.81	0.855	1.86	0.761	0.887	120	647	1311	1172	-0.446	555	756	522	650	0
1	11	18	iYNL197C	iYNL197C	4430	17430	120	392	372	188	46	48	19	94	90	0	1720	1490	821	62	63	31	95	95	0	0.209	0.228	0.235	0.24	2.249	0.218	0.866	120	572	2004	1754	-2.261	346	1658	326	1428	0
1	12	18	iYNL193W	iYNL193W	4640	17440	130	383	341	146	46	47	11	95	95	0	2855	2481	1262	63	60	18	98	98	0	0.121	0.122	0.122	0.127	1.599	0.112	0.881	120	593	3129	2713	-3.05	337	2792	295	2418	0
1	13	18	iYNL176C	iYNL176C	4830	17430	130	495	464	250	45	47	10	95	93	0	3562	3112	1865	62	60	18	95	95	0	0.129	0.137	0.142	0.147	1.88	0.13	0.873	120	584	3950	3469	-2.959	450	3500	419	3050	0
1	14	18	iYNL168C	iYNL168C	5040	17430	130	1556	1329	722	45	47	10	98	97	0	2354	1908	1029	62	62	28	94	92	0	0.659	0.696	0.709	0.784	1.985	0.695	0.894	120	604	3803	3130	-0.601	1511	2292	1284	1846	0
1	15	18	iYNL164C	iYNL164C	5230	17430	130	531	471	225	48	51	46	95	89	0	2058	1880	1079	62	62	22	98	96	0	0.242	0.233	0.229	0.264	1.778	0.214	0.897	120	577	2479	2241	-2.047	483	1996	423	1818	0
1	16	18	iYOL113W	iYOL113W	5440	17420	130	811	1006	2652	47	49	12	96	95	0	1138	1103	1011	62	60	18	90	88	0	0.71	0.921	0.754	0.82	1.956	2.898	0.369	120	613	1840	2000	-0.494	764	1076	959	1041	0
1	17	18	iYOL109W	iYOL109W	5640	17420	130	140	139	56	46	48	12	90	83	0	460	407	199	62	61	20	90	90	0	0.236	0.27	0.245	0.27	2.22	0.245	0.752	120	606	492	438	-2.082	94	398	93	345	0
1	18	18	iYOLCdelta3	iYOLCdelta3	5840	17420	130	492	477	254	47	48	11	98	97	0	533	520	283	61	61	21	92	88	0	0.943	0.937	0.931	1.034	2.132	0.927	0.855	120	595	917	889	-0.085	445	472	430	459	0
1	19	18	iYOL092W	iYOL092W	6050	17420	120	260	247	116	46	47	11	93	92	0	667	616	320	61	59	18	92	90	0	0.353	0.362	0.359	0.36	1.934	0.339	0.845	120	563	820	756	-1.502	214	606	201	555	0
1	20	18	iYOL088C	iYOL088C	6240	17410	130	672	592	279	46	48	10	97	95	0	1603	1409	694	61	61	30	96	95	0	0.406	0.405	0.401	0.412	1.71	0.363	0.823	120	601	2168	1894	-1.301	626	1542	546	1348	0
1	21	18	iYOL084W	iYOL084W	6440	17410	130	898	790	342	46	48	13	100	99	0	1377	1211	561	63	63	29	98	98	0	0.648	0.648	0.628	0.683	1.827	0.624	0.914	120	701	2166	1892	-0.625	852	1314	744	1148	0
1	1	19	iYOL067C	iYOL067C	2440	17660	130	628	578	298	44	45	10	98	97	0	2433	2064	1203	60	58	21	96	95	0	0.246	0.266	0.272	0.304	1.867	0.248	0.89	120	651	2957	2538	-2.023	584	2373	534	2004	0
1	2	19	iYOL063C	iYOL063C	2650	17660	130	983	899	502	44	45	10	100	99	0	1326	1321	796	61	60	21	96	95	0	0.742	0.679	0.651	0.735	1.897	0.626	0.872	120	597	2204	2115	-0.43	939	1265	855	1260	0
1	3	19	iYOL059W	iYOL059W	2840	17660	120	1072	938	452	45	47	16	100	99	0	5325	4600	2370	62	61	20	100	100	0	0.195	0.197	0.197	0.212	1.701	0.187	0.889	120	546	6290	5431	-2.357	1027	5263	893	4538	0
1	4	19	iYOL045W	iYOL045W	3040	17660	120	2272	2016	940	45	47	15	99	99	0	2615	2391	1216	62	64	74	98	94	0	0.872	0.846	0.839	0.892	1.61	0.813	0.904	120	542	4780	4300	-0.197	2227	2553	1971	2329	0
1	5	19	iYOL041C	iYOL041C	3240	17650	140	1295	1209	661	44	46	13	98	97	0	2502	2376	1246	62	60	19	97	97	0	0.513	0.503	0.5	0.474	1.725	0.504	0.926	156	688	3691	3479	-0.964	1251	2440	1165	2314	0
1	6	19	iYOL035C	iYOL035C	3450	17640	130	280	269	135	44	45	10	98	94	0	1863	1602	958	61	67	157	90	85	0	0.131	0.146	0.155	0.163	2.275	0.131	0.832	120	612	2038	1766	-2.933	236	1802	225	1541	0
1	7	19	iYOR260W	iYOR260W	3660	17650	130	823	789	472	45	45	10	99	97	0	2241	2206	1499	61	68	159	86	81	0	0.357	0.347	0.357	0.393	2.252	0.31	0.852	120	614	2958	2889	-1.486	778	2180	744	2145	0
1	8	19	iYOR265W	iYOR265W	3850	17640	130	737	680	362	45	46	11	97	96	0	2384	2018	1163	62	61	27	96	95	0	0.298	0.325	0.32	0.353	2.044	0.308	0.875	120	584	3014	2591	-1.747	692	2322	635	1956	0
1	9	19	iYOR269W	iYOR269W	4050	17640	130	1382	1256	685	45	47	11	96	95	0	1663	1424	778	62	63	51	91	89	0	0.835	0.889	0.862	0.948	1.924	0.897	0.894	120	612	2938	2573	-0.26	1337	1601	1211	1362	0
1	10	19	iYOR287C	iYOR287C	4260	17640	130	886	812	454	46	48	17	96	93	0	2469	2080	1236	62	61	20	94	92	0	0.349	0.38	0.384	0.388	1.719	0.359	0.91	120	579	3247	2784	-1.519	840	2407	766	2018	0
1	11	19	iYOR290C	iYOR290C	4450	17640	130	549	545	238	46	48	17	99	99	0	2812	2436	1288	63	62	22	98	98	0	0.183	0.21	0.209	0.235	1.732	0.194	0.906	120	610	3252	2872	-2.45	503	2749	499	2373	0
1	12	19	iYOR294W	iYOR294W	4650	17640	130	491	458	224	46	48	12	96	93	0	1820	1615	930	64	63	22	94	94	0	0.253	0.266	0.255	0.274	1.832	0.248	0.917	120	562	2201	1963	-1.98	445	1756	412	1551	0
1	13	19	iYOR311C	iYOR311C	4840	17630	130	597	526	292	46	48	12	96	95	0	1162	1057	631	63	63	26	91	89	0	0.501	0.483	0.488	0.507	1.842	0.461	0.884	120	596	1650	1474	-0.996	551	1099	480	994	0
1	14	19	iYOR315W	iYOR315W	5040	17630	130	580	522	251	47	48	11	98	97	0	1526	1339	711	63	62	25	96	95	0	0.364	0.372	0.38	0.419	1.887	0.355	0.9	120	621	1996	1751	-1.457	533	1463	475	1276	0
1	15	19	iYOR318C	iYOR318C	5240	17630	130	815	708	341	47	48	12	100	100	0	3157	2602	1304	63	62	20	99	99	0	0.248	0.26	0.251	0.262	1.56	0.251	0.91	120	599	3862	3200	-2.01	768	3094	661	2539	0
1	16	19	iYOR337W	iYOR337W	5440	17620	130	428	411	238	46	48	15	95	92	0	1524	1327	812	62	61	18	94	92	0	0.261	0.289	0.295	0.305	2.156	0.277	0.869	120	578	1844	1630	-1.936	382	1462	365	1265	0
1	17	19	iYOR341W	iYOR341W	5640	17620	120	2126	2049	1237	46	48	13	100	100	0	2856	2568	1484	62	62	20	96	95	0	0.744	0.799	0.8	0.809	1.826	0.802	0.901	120	543	4874	4509	-0.426	2080	2794	2003	2506	0
1	18	19	iYORWdelta24	iYORWdelta24	5850	17620	140	366	351	182	47	48	11	96	96	0	1011	886	487	62	60	20	94	94	0	0.336	0.369	0.363	0.368	1.774	0.355	0.893	156	664	1268	1128	-1.573	319	949	304	824	0
1	19	19	iYPL030W	iYPL030W	6050	17620	130	621	601	323	46	47	11	98	96	0	1874	1614	904	61	59	18	95	93	0	0.317	0.357	0.358	0.399	2.014	0.338	0.88	120	580	2388	2108	-1.657	575	1813	555	1553	0
1	20	19	iYPL026C	iYPL026C	6250	17610	130	299	300	180	47	48	11	91	86	0	1258	1139	759	62	64	80	86	80	0	0.211	0.235	0.216	0.241	2.26	0.214	0.824	120	598	1448	1330	-2.247	252	1196	253	1077	0
1	21	19	iYPL022W	iYPL022W	6450	17610	140	3652	3488	2345	48	49	11	100	98	0	2512	2444	1675	63	61	17	99	98	0	1.472	1.445	1.378	1.403	1.927	1.45	0.909	156	762	6053	5821	0.557	3604	2449	3440	2381	0
1	1	20	iYPL005W	iYPL005W	2450	17860	130	3810	3539	1802	44	45	10	100	100	0	1516	1427	782	62	60	21	100	100	0	2.59	2.56	2.584	2.75	1.698	2.572	0.892	120	751	5220	4860	1.373	3766	1454	3495	1365	0
1	2	20	iYPL001W	iYPL001W	2650	17860	120	584	569	306	45	46	16	97	95	0	333	322	152	61	60	18	91	88	0	1.982	2.008	2	2.077	2.174	2.107	0.836	120	636	811	785	0.987	539	272	524	261	0
1	3	20	itF(GAA)P1	itF(GAA)P1	2860	17860	130	2177	2069	1265	45	48	16	99	99	0	869	734	396	62	62	20	91	90	0	2.642	3.012	2.971	2.947	1.863	3.235	0.863	120	713	2939	2696	1.402	2132	807	2024	672	0
1	4	20	iYPR013C-1	iYPR013C-1	3060	17850	130	980	984	510	45	47	13	100	98	0	2850	2496	1327	62	61	19	100	99	0	0.335	0.386	0.396	0.399	1.85	0.369	0.879	120	678	3723	3373	-1.576	935	2788	939	2434	0
1	5	20	iYPR016C	iYPR016C	3260	17860	130	455	422	216	44	45	12	94	94	0	777	741	397	63	61	19	91	90	0	0.576	0.558	0.533	0.569	2.314	0.512	0.82	120	671	1125	1056	-0.797	411	714	378	678	0
1	6	20	iYPR020W	iYPR020W	3450	17840	130	1668	1585	833	44	49	46	97	95	0	1040	934	547	63	64	39	91	89	0	1.662	1.769	1.712	1.879	1.774	1.722	0.876	120	681	2601	2412	0.733	1624	977	1541	871	0
1	7	20	iYPR035W	iYPR035W	3650	17850	120	1039	1022	543	45	50	48	97	95	0	1967	1953	1166	62	64	39	98	96	0	0.522	0.517	0.525	0.574	1.892	0.478	0.87	120	639	2899	2868	-0.938	994	1905	977	1891	0
1	8	20	iYPR042C	iYPR042C	3860	17840	130	465	423	209	45	46	11	98	97	0	2601	2427	1456	62	62	25	95	95	0	0.165	0.16	0.156	0.183	2.168	0.143	0.838	120	693	2959	2743	-2.596	420	2539	378	2365	0
1	9	20	iYPR047W	iYPR047W	4060	17840	140	1048	1051	748	46	47	11	98	96	0	1728	1957	1514	64	62	20	94	91	0	0.602	0.531	0.53	0.644	2.625	0.493	0.87	156	774	2666	2898	-0.732	1002	1664	1005	1893	0
1	10	20	iYCL001W-A	iYCL001W-A	4260	17830	140	4323	6008	5075	46	48	13	96	96	0	1649	1858	1602	63	62	19	91	89	0	2.697	3.321	3.065	3.085	2.654	3.467	0.85	156	742	5863	7757	1.431	4277	1586	5962	1795	0
1	11	20	iYCL007C	iYCL007C	4460	17840	130	456	507	322	45	47	13	96	93	0	521	585	409	63	62	20	91	88	0	0.897	0.885	0.835	0.885	2.225	0.81	0.841	120	659	869	984	-0.156	411	458	462	522	0
1	12	20	iYCL012W	iYCL012W	4660	17830	140	5081	6128	4430	46	48	13	100	100	0	1234	1544	1163	63	63	21	95	92	0	4.3	4.107	4.14	4.394	2.11	4.226	0.866	156	766	6206	7563	2.104	5035	1171	6082	1481	0
1	13	20	iYCR011C	iYCR011C	4860	17830	130	425	463	276	47	49	16	95	93	0	1011	1062	660	64	62	21	94	94	0	0.399	0.417	0.388	0.405	1.939	0.384	0.838	120	700	1325	1414	-1.325	378	947	416	998	0
1	14	20	iYCRCdelta6-A	iYCRCdelta6-A	5060	17820	110	145	145	60	47	49	15	90	82	0	331	312	168	62	62	22	88	85	0	0.364	0.392	0.395	0.439	2.18	0.327	0.765	80	536	367	348	-1.457	98	269	98	250	0
1	15	20	iYHR210C-A	iYHR210C-A	5270	17830	140	1967	1971	1121	46	48	12	100	100	0	2331	2323	1402	63	62	21	98	98	0	0.847	0.852	0.839	0.897	1.709	0.819	0.901	156	800	4189	4185	-0.24	1921	2268	1925	2260	0
1	16	20	iYHRCdelta14-C	iYHRCdelta14-C	5450	17800	130	1076	1166	731	47	48	14	99	98	0	1902	2133	1526	63	62	19	99	97	0	0.56	0.541	0.555	0.587	1.7	0.49	0.88	120	627	2868	3189	-0.838	1029	1839	1119	2070	0
1	17	20	iYHRCdelta16-B	iYHRCdelta16-B	5660	17810	130	257	251	120	46	48	12	96	94	0	508	506	281	63	61	18	98	95	0	0.474	0.463	0.453	0.483	1.996	0.423	0.884	120	692	656	648	-1.077	211	445	205	443	0
1	18	20	iYLR157C-A	iYLR157C-A	5860	17810	130	83	84	30	46	47	11	79	69	0	148	144	57	61	59	17	86	80	0	0.425	0.458	0.481	0.446	2.608	0.361	0.428	120	658	124	121	-1.233	37	87	38	83	0
1	19	20	tE(UUC)C	tE(UUC)C	6060	17810	120	101	105	43	45	46	11	86	81	0	185	181	86	61	99	698	0	0	0	0.452	0.5	0.496	0.474	2.405	0.004	0.009	120	622	180	180	-1.147	56	124	60	120	0
1	20	20	tQ(UUG)L	tQ(UUG)L	6270	17810	130	170	175	80	48	49	11	91	89	0	379	398	223	62	64	76	85	74	0	0.385	0.378	0.37	0.381	2.163	0.282	0.63	120	672	439	463	-1.378	122	317	127	336	0
1	21	20	YHRCTy1-1B	YHRCTy1-1B	6460	17810	150	19051	20837	14406	49	51	12	100	100	0	18778	21233	14100	63	62	19	100	100	0	1.015	0.982	0.968	0.962	1.803	0.992	0.9	156	966	37717	41958	0.022	19002	18715	20788	21170	0
2	1	1	VPS8	YAL002W	6950	14030	140	5564	8853	7864	49	59	45	99	98	0	2485	4329	3934	62	71	62	92	90	0	2.276	2.063	2.021	2.331	2.407	2.059	0.917	156	816	7938	13071	1.187	5515	2423	8804	4267	0
2	2	1	MTW1	YAL034W-A	7130	14040	120	13044	11888	6940	49	57	76	100	99	0	6688	5665	3552	62	65	51	92	88	0	1.961	2.113	2.093	2.678	2.318	2.086	0.921	120	586	19621	17442	0.972	12995	6626	11839	5603	0
2	3	1	YAL065C-A	YAL065C-A	7350	14040	130	2298	2490	1817	50	58	73	94	89	0	2916	3161	2495	61	72	89	87	86	0	0.787	0.787	0.761	0.943	2.337	0.752	0.929	120	692	5103	5540	-0.345	2248	2855	2440	3100	0
2	4	1	YAL004W	YAL004W	7540	14040	120	1456	1927	1570	49	51	13	100	100	0	2841	4183	3643	58	59	28	96	95	0	0.506	0.455	0.444	0.528	2.401	0.433	0.938	120	595	4190	6003	-0.984	1407	2783	1878	4125	0
2	5	1	FUN12	YAL035W	7740	14040	120	3265	4614	3980	49	55	68	97	94	0	3116	5297	4935	58	63	53	91	89	0	1.052	0.871	0.97	1.184	2.671	0.829	0.915	120	613	6274	9804	0.073	3216	3058	4565	5239	0
2	6	1	SEO1	YAL067C	7940	14020	120	1220	2217	1954	50	56	69	96	94	0	2195	3933	3494	60	63	52	90	90	0	0.548	0.56	0.545	0.663	2.138	0.553	0.954	120	600	3305	6040	-0.868	1170	2135	2167	3873	0
2	7	1	ERP2	YAL007C	8140	14020	140	3132	4499	3946	51	54	21	100	100	0	1891	3120	2869	60	64	48	91	89	0	1.683	1.454	1.456	1.711	2.176	1.429	0.924	156	793	4912	7508	0.751	3081	1831	4448	3060	0
2	8	1	YAL037W	YAL037W	8350	14020	130	2246	2195	1440	52	125	622	78	66	0	4411	4328	3043	62	170	1100	74	66	0	0.504	0.502	0.496	0.573	2.005	0.516	0.876	120	694	6543	6409	-0.987	2194	4349	2143	4266	0
2	9	1	YAL069W	YAL069W	8550	14020	130	18519	18040	12817	52	151	670	90	84	0	21816	18536	13273	62	173	845	80	79	0	0.849	0.974	1.02	1.267	2.184	0.971	0.933	120	679	40221	36462	-0.236	18467	21754	17988	18474	0
2	10	1	SPO7	YAL009W	8750	14010	140	2991	4627	4094	50	75	226	90	82	0	2211	3585	3185	60	110	428	80	69	0	1.367	1.298	1.313	1.449	2.64	1.295	0.891	156	754	5092	8102	0.451	2941	2151	4577	3525	0
2	11	1	CYC3	YAL039C	8950	14010	140	644	1012	881	51	56	30	97	92	0	2755	4669	4364	60	68	62	94	92	0	0.22	0.209	0.209	0.243	2.398	0.197	0.914	156	743	3288	5570	-2.184	593	2695	961	4609	0
2	12	1	YAR002W	YAR002W	9140	14000	130	9880	11948	8941	52	98	324	96	92	0	5145	5669	4364	62	92	213	88	84	0	1.934	2.122	2.121	2.563	2.152	2.128	0.946	120	664	14911	17503	0.951	9828	5083	11896	5607	0
2	13	1	CNS1	YBR155W	9350	14000	140	3241	5068	4641	52	93	297	90	77	0	2585	4951	4712	62	87	195	87	82	0	1.264	1.026	1.064	1.242	2.132	1.004	0.927	156	801	5712	9905	0.338	3189	2523	5016	4889	0
2	14	1	PCH2	YBR186W	9550	14010	130	241	492	581	51	60	63	78	58	0	545	1621	2221	61	74	117	83	65	0	0.393	0.283	0.288	0.371	3.223	0.253	0.88	120	693	674	2001	-1.349	190	484	441	1560	0
2	15	1	PYC2	YBR218C	9770	14000	110	804	772	560	51	60	59	86	78	0	1876	1842	1475	62	79	132	76	71	0	0.415	0.405	0.392	0.534	3.228	0.375	0.889	80	556	2567	2501	-1.268	753	1814	721	1780	0
2	16	1	ICS2	YBR157C	9960	14000	120	698	755	519	51	52	13	97	94	0	3365	3423	2423	60	63	39	91	90	0	0.196	0.209	0.213	0.221	2.067	0.206	0.91	120	606	3952	4067	-2.353	647	3305	704	3363	0
2	17	1	NTC20	YBR188C	10150	14000	120	2065	3007	2477	51	57	40	98	96	0	2789	3536	3042	60	133	1155	60	51	0	0.738	0.85	0.873	0.992	2.519	0.661	0.632	120	616	4743	6432	-0.438	2014	2729	2956	3476	0
2	18	1	YBR220C	YBR220C	10360	14000	130	1222	1406	1078	52	58	39	95	91	0	4706	5648	4718	62	129	1070	70	62	0	0.252	0.242	0.243	0.315	2.615	0.198	0.78	120	722	5814	6940	-1.989	1170	4644	1354	5586	0
2	19	1	YBR159W	YBR159W	10550	13990	120	1942	1581	985	51	60	47	95	92	0	5873	4744	3295	60	94	192	86	85	0	0.325	0.327	0.327	0.422	2.648	0.302	0.918	120	630	7704	6214	-1.62	1891	5813	1530	4684	0
2	20	1	YBR190W	YBR190W	10760	13990	120	381	451	333	51	58	44	85	72	0	1397	1557	1266	61	88	168	85	70	0	0.247	0.267	0.263	0.283	2.544	0.255	0.906	120	642	1666	1896	-2.017	330	1336	400	1496	0
2	21	1	FAT2	YBR222C	10970	13990	130	349	457	358	50	52	12	94	88	0	2225	2503	2177	59	65	101	88	82	0	0.138	0.167	0.171	0.192	2.702	0.154	0.843	120	793	2465	2851	-2.857	299	2166	407	2444	0
2	1	2	YBR161W	YBR161W	6970	14240	120	2035	1964	1266	52	67	54	100	100	0	6755	6827	4748	65	84	78	100	98	0	0.296	0.283	0.288	0.311	1.822	0.268	0.899	120	568	8673	8674	-1.754	1983	6690	1912	6762	0
2	2	2	RIM2	YBR192W	7150	14230	130	2923	2532	1593	51	67	85	96	95	0	5111	4814	3093	63	90	124	93	90	0	0.569	0.522	0.52	0.568	2.261	0.506	0.912	120	585	7920	7232	-0.814	2872	5048	2481	4751	0
2	3	2	YBR224W	YBR224W	7350	14230	120	1732	1893	1310	51	77	113	95	90	0	3699	4219	3289	61	140	348	87	76	0	0.462	0.443	0.443	0.572	2.631	0.398	0.901	120	600	5319	6000	-1.114	1681	3638	1842	4158	0
2	4	2	GPM2	YDL021W	7560	14230	120	4390	3935	2586	51	73	111	98	93	0	3982	3463	2499	60	119	335	77	71	0	1.106	1.141	1.165	1.469	2.283	1.106	0.893	120	596	8261	7287	0.146	4339	3922	3884	3403	0
2	5	2	YDL053C	YDL053C	7770	14230	130	1045	1017	595	50	58	42	95	91	0	4355	3457	2360	59	77	124	89	87	0	0.232	0.285	0.286	0.353	2.438	0.259	0.889	120	619	5291	4365	-2.11	995	4296	967	3398	0
2	6	2	YDL085W	YDL085W	7960	14220	120	1838	1547	980	50	55	25	99	96	0	5210	4257	2991	60	83	157	87	84	0	0.347	0.357	0.35	0.429	2.453	0.327	0.884	120	576	6938	5694	-1.526	1788	5150	1497	4197	0
2	7	2	YDL023C	YDL023C	8170	14220	130	1269	1134	706	51	56	29	93	91	0	4595	4036	2717	61	87	152	86	83	0	0.269	0.272	0.27	0.31	2.555	0.265	0.886	120	630	5752	5058	-1.896	1218	4534	1083	3975	0
2	8	2	PSA1	YDL055C	8370	14220	120	715	604	329	52	60	54	85	81	0	1443	1147	714	61	84	125	80	78	0	0.48	0.508	0.479	0.591	2.627	0.451	0.837	120	574	2045	1638	-1.06	663	1382	552	1086	0
2	9	2	LUC7	YDL087C	8580	14220	130	1292	1217	787	52	70	176	84	75	0	6435	5884	4230	61	88	204	86	85	0	0.195	0.2	0.197	0.262	2.716	0.187	0.899	120	596	7614	6988	-2.362	1240	6374	1165	5823	0
2	10	2	YDL025C	YDL025C	8760	14210	120	1996	1620	877	52	62	51	97	94	0	5266	4490	2742	61	106	234	87	84	0	0.373	0.354	0.36	0.443	2.389	0.323	0.906	120	528	7149	5997	-1.421	1944	5205	1568	4429	0
2	11	2	YDL057W	YDL057W	8960	14210	120	1419	1299	797	52	65	55	94	88	0	3701	3354	2358	62	110	222	85	79	0	0.376	0.379	0.383	0.452	2.085	0.34	0.885	120	556	5006	4539	-1.413	1367	3639	1247	3292	0
2	12	2	YDL089W	YDL089W	9170	14210	120	490	455	254	51	70	85	85	76	0	612	577	368	64	87	108	78	70	0	0.801	0.788	0.749	0.88	2.082	0.689	0.813	120	604	987	917	-0.32	439	548	404	513	0
2	13	2	YDL027C	YDL027C	9380	14210	130	1382	1286	839	51	58	45	93	91	0	7487	5872	4181	61	72	83	91	90	0	0.179	0.213	0.215	0.268	2.217	0.201	0.912	120	665	8757	7046	-2.48	1331	7426	1235	5811	0
2	14	2	RAD59	YDL059C	9580	14190	130	882	857	628	52	60	55	85	76	0	4762	4124	3180	62	95	231	80	75	0	0.177	0.198	0.191	0.223	2.341	0.192	0.934	120	601	5530	4867	-2.501	830	4700	805	4062	0
2	15	2	YDL091C	YDL091C	9770	14200	120	5187	4559	3276	52	66	77	100	95	0	5586	5232	4025	62	108	255	86	80	0	0.93	0.872	0.865	1.064	2.199	0.832	0.909	120	597	10659	9677	-0.105	5135	5524	4507	5170	0
2	16	2	RPA14	YDR156W	9980	14200	120	79	142	128	50	62	70	32	23	0	316	979	1314	62	83	129	70	48	0	0.114	0.1	0.099	0.104	2.711	0.091	0.763	120	573	283	1009	-3.131	29	254	92	917	0
2	17	2	YDR187C	YDR187C	10180	14200	130	302	541	505	50	55	45	89	73	0	841	2081	2179	63	120	1092	41	37	0	0.324	0.243	0.255	0.279	2.14	0.231	0.871	120	686	1030	2509	-1.626	252	778	491	2018	0
2	18	2	YDR219C	YDR219C	10400	14200	100	165	332	402	52	55	18	85	78	0	231	644	1016	60	62	23	80	77	0	0.661	0.479	0.539	0.567	2.176	0.396	0.884	80	460	284	864	-0.598	113	171	280	584	0
2	19	2	HOM2	YDR158W	10580	14200	130	6970	8367	7597	52	60	34	100	100	0	8870	10758	9871	61	76	84	97	93	0	0.785	0.777	0.806	0.937	2.2	0.777	0.921	120	611	15727	19012	-0.349	6918	8809	8315	10697	0
2	20	2	SLY1	YDR189W	10780	14190	120	3353	3428	2896	52	59	35	99	95	0	3352	4173	3517	61	76	73	90	88	0	1.003	0.821	0.806	0.892	2.193	0.821	0.901	120	563	6592	7488	0.004	3301	3291	3376	4112	0
2	21	2	YDR221W	YDR221W	10980	14190	120	410	633	631	51	54	18	92	88	0	1279	2163	2360	61	69	111	87	75	0	0.295	0.277	0.301	0.316	2.232	0.258	0.894	120	624	1577	2684	-1.762	359	1218	582	2102	0
2	1	3	SSY1	YDR160W	6980	14440	120	3390	3291	2230	50	56	23	100	100	0	6672	6833	4884	64	73	57	94	93	0	0.505	0.479	0.501	0.557	2.036	0.456	0.91	120	602	9948	10010	-0.984	3340	6608	3241	6769	0
2	2	3	HST4	YDR191W	7180	14440	120	2538	2732	2155	50	58	36	98	94	0	3478	3345	2696	61	76	77	90	86	0	0.728	0.817	0.835	0.946	2.101	0.803	0.93	120	580	5905	5966	-0.458	2488	3417	2682	3284	0
2	3	3	YDR223W	YDR223W	7370	14440	80	278	307	192	51	62	49	78	71	0	770	701	463	65	84	111	78	71	0	0.322	0.403	0.399	0.4	1.801	0.397	0.915	52	329	932	892	-1.635	227	705	256	636	0
2	4	3	NBP2	YDR162C	7600	14430	100	127	738	1181	48	50	15	91	81	0	216	1328	2228	60	61	24	82	80	0	0.506	0.544	0.495	0.517	2.089	0.516	0.895	80	492	235	1958	-0.982	79	156	690	1268	0
2	5	3	YDR193W	YDR193W	7800	14440	130	601	694	508	49	51	12	96	93	0	1321	1990	1787	61	62	28	93	92	0	0.438	0.334	0.34	0.424	2.392	0.295	0.918	120	646	1812	2574	-1.191	552	1260	645	1929	0
2	6	3	HTA1	YDR225W	7990	14430	120	1366	1994	1554	51	62	99	96	92	0	4026	4461	3396	61	92	245	89	88	0	0.332	0.442	0.472	0.489	2.008	0.438	0.924	120	546	5280	6343	-1.592	1315	3965	1943	4400	0
2	7	3	YDR539W	YDR539W	8190	14430	120	1293	1665	1485	50	55	28	97	91	0	2277	2639	2399	61	77	105	81	75	0	0.561	0.626	0.67	0.769	1.931	0.613	0.928	120	574	3459	4193	-0.834	1243	2216	1615	2578	0
2	8	3	YEL025C	YEL025C	8390	14420	130	1059	1654	1850	50	55	34	94	87	0	1708	2636	2891	61	73	88	82	78	0	0.613	0.623	0.648	0.695	2.401	0.626	0.944	120	599	2656	4179	-0.707	1009	1647	1604	2575	0
2	9	3	YEL057C	YEL057C	8580	14420	120	1391	1738	1327	51	59	30	97	94	0	2518	3682	3089	61	81	81	92	90	0	0.545	0.466	0.463	0.578	2.484	0.435	0.915	120	576	3797	5308	-0.875	1340	2457	1687	3621	0
2	10	3	YDR541C	YDR541C	8790	14420	120	754	1276	1264	52	63	43	91	85	0	1237	2189	2307	62	87	109	79	69	0	0.597	0.575	0.607	0.77	2.274	0.549	0.928	120	560	1877	3351	-0.743	702	1175	1224	2127	0
2	11	3	CUP5	YEL027W	8980	14410	130	816	1210	1123	51	61	34	94	85	0	1177	2835	2856	62	88	104	83	74	0	0.686	0.418	0.42	0.539	2.48	0.392	0.919	120	617	1880	3932	-0.544	765	1115	1159	2773	0
2	12	3	SOM1	YEL059C-A	9190	14410	120	722	682	476	50	58	31	90	84	0	1878	2292	1814	62	87	94	83	80	0	0.37	0.283	0.275	0.338	2.18	0.258	0.868	120	581	2488	2862	-1.434	672	1816	632	2230	0
2	13	3	YDR543C	YDR543C	9370	14410	90	365	378	258	51	76	139	63	51	0	428	555	412	63	108	213	65	44	0	0.86	0.665	0.642	0.637	2.285	0.631	0.892	52	387	679	819	-0.217	314	365	327	492	0
2	14	3	YEL029C	YEL029C	9590	14410	120	1848	2196	1769	51	67	109	87	85	0	2251	2538	2127	62	88	176	80	73	0	0.821	0.866	0.895	1.134	2.57	0.842	0.904	120	642	3986	4621	-0.285	1797	2189	2145	2476	0
2	15	3	PRB1	YEL060C	9790	14400	110	192	210	116	51	54	18	90	86	0	554	500	322	60	62	26	86	85	0	0.285	0.361	0.334	0.363	2.177	0.312	0.703	80	485	635	599	-1.809	141	494	159	440	0
2	16	3	YRF1-1	YDR545W	9990	14400	130	1293	3898	4967	50	54	24	99	98	0	1670	4473	5679	61	65	35	95	90	0	0.773	0.872	0.843	0.976	2.413	0.869	0.924	120	650	2852	8260	-0.372	1243	1609	3848	4412	0
2	17	3	SPF1	YEL031W	10200	14400	100	196	291	246	51	57	52	72	55	0	307	561	595	61	66	44	71	68	0	0.589	0.48	0.467	0.479	2.293	0.396	0.802	80	474	391	740	-0.763	145	246	240	500	0
2	18	3	NPR2	YEL062W	10400	14400	130	2177	4040	4279	52	58	45	96	93	0	1486	3235	3459	60	66	47	87	83	0	1.49	1.256	1.299	1.604	2.319	1.255	0.922	120	641	3551	7163	0.575	2125	1426	3988	3175	0
2	19	3	PES4	YFR023W	10600	14390	120	3897	5038	4439	52	61	32	98	98	0	2678	4214	3880	62	71	50	90	87	0	1.47	1.201	1.238	1.477	2.404	1.179	0.925	120	559	6461	9138	0.556	3845	2616	4986	4152	0
2	20	3	HXK1	YFR053C	10810	14390	120	1892	2713	2445	53	61	33	96	94	0	2802	5140	4924	62	75	63	88	85	0	0.671	0.524	0.536	0.669	2.466	0.5	0.924	120	544	4579	7738	-0.575	1839	2740	2660	5078	0
2	21	3	SCW11	YGL028C	10990	14390	120	3966	4414	3417	52	61	36	99	96	0	5915	6170	5093	62	77	71	93	90	0	0.669	0.714	0.713	0.883	2.206	0.686	0.928	120	594	9767	10470	-0.581	3914	5853	4362	6108	0
2	1	4	YFR024C-A	YFR024C-A	7000	14640	120	199	655	887	47	49	13	96	90	0	231	856	1330	61	78	308	35	27	0	0.894	0.765	0.906	0.97	2.298	0.588	0.753	120	612	322	1403	-0.161	152	170	608	795	0
2	2	4	YFR055W	YFR055W	7190	14630	130	2053	2290	1706	49	61	51	96	89	0	4481	4921	3918	62	83	111	90	83	0	0.453	0.461	0.46	0.559	2.1	0.439	0.943	120	604	6423	7100	-1.141	2004	4419	2241	4859	0
2	3	4	RPL30	YGL030W	7390	14630	130	2121	1997	1494	51	70	63	95	90	0	2069	2330	1875	63	99	130	87	80	0	1.032	0.858	0.854	0.944	1.836	0.825	0.933	120	639	4076	4213	0.045	2070	2006	1946	2267	0
2	4	4	YFR026C	YFR026C	7590	14630	130	1326	1620	1321	52	76	79	90	83	0	3153	3783	3334	63	124	216	84	76	0	0.412	0.422	0.429	0.497	1.879	0.393	0.939	120	693	4364	5288	-1.278	1274	3090	1568	3720	0
2	5	4	YFR057W	YFR057W	7810	14620	90	203	339	345	52	68	71	65	50	0	335	633	839	64	112	209	55	30	0	0.557	0.504	0.508	0.589	3.28	0.404	0.795	52	372	422	856	-0.844	151	271	287	569	0
2	6	4	AGA2	YGL032C	7990	14620	130	2246	2415	1776	51	85	152	91	82	0	2187	2893	2308	63	118	274	80	71	0	1.033	0.835	0.853	0.974	1.899	0.789	0.928	120	643	4319	5194	0.047	2195	2124	2364	2830	0
2	7	4	CDC14	YFR028C	8200	14630	130	1515	2064	1745	51	86	130	86	78	0	2920	4065	3742	63	122	203	81	76	0	0.512	0.503	0.515	0.642	2.112	0.474	0.935	120	622	4321	6015	-0.965	1464	2857	2013	4002	0
2	8	4	ERP6	YGL002W	8390	14620	130	2531	2834	2276	52	88	125	91	85	0	2453	3900	3453	63	136	238	85	79	0	1.037	0.725	0.726	0.831	1.902	0.673	0.923	120	607	4869	6619	0.053	2479	2390	2782	3837	0
2	9	4	YGL034C	YGL034C	8580	14620	100	267	279	190	51	90	136	55	40	0	798	781	647	66	141	247	65	56	0	0.295	0.319	0.29	0.328	2.091	0.31	0.776	80	476	948	943	-1.761	216	732	228	715	0
2	10	4	RPL11B	YGR085C	8790	14610	130	2227	2560	2098	52	81	105	88	84	0	3132	4847	4295	66	150	290	79	77	0	0.709	0.525	0.537	0.673	2.325	0.487	0.93	120	669	5241	7289	-0.495	2175	3066	2508	4781	0
2	11	4	YGR117C	YGR117C	9000	14610	130	4252	4231	3296	53	92	115	91	85	0	3784	4778	4002	63	159	297	80	72	0	1.128	0.886	0.865	1.054	2.203	0.853	0.933	120	647	7920	8893	0.174	4199	3721	4178	4715	0
2	12	4	YGR149W	YGR149W	9200	14610	130	3208	3574	2793	52	71	63	95	90	0	3614	4243	3600	62	94	107	87	85	0	0.889	0.842	0.826	0.975	2.236	0.804	0.922	120	630	6708	7703	-0.171	3156	3552	3522	4181	0
2	13	4	PDC6	YGR087C	9410	14610	120	699	897	703	52	62	41	95	89	0	3181	4047	3493	61	114	823	73	58	0	0.207	0.212	0.225	0.277	2.601	0.176	0.803	120	593	3767	4831	-2.27	647	3120	845	3986	0
2	14	4	NUP57	YGR119C	9600	14600	130	3842	4455	3585	53	66	58	95	91	0	4048	4665	4141	63	123	824	65	59	0	0.951	0.957	0.98	1.364	2.523	0.858	0.851	120	598	7774	9004	-0.073	3789	3985	4402	4602	0
2	15	4	YGR151C	YGR151C	9820	14600	160	795	743	451	53	68	59	89	84	0	2732	2549	1688	63	97	145	88	85	0	0.278	0.278	0.269	0.308	2.064	0.127	0.447	208	766	3411	3176	-1.847	742	2669	690	2486	0
2	16	4	YGR089W	YGR089W	10000	14600	130	940	1560	1520	52	56	25	98	95	0	1693	3492	3647	63	71	85	87	85	0	0.545	0.44	0.45	0.526	2.219	0.416	0.935	120	532	2518	4937	-0.876	888	1630	1508	3429	0
2	17	4	MEP1	YGR121C	10200	14600	120	1011	1751	1666	52	57	32	96	95	0	3543	5973	6015	63	84	99	95	90	0	0.276	0.287	0.299	0.371	2.179	0.274	0.94	120	581	4439	7609	-1.859	959	3480	1699	5910	0
2	18	4	YGR153W	YGR153W	10400	14590	130	561	648	465	53	61	35	91	85	0	5190	5390	4316	63	119	193	90	82	0	0.099	0.112	0.113	0.138	2.379	0.107	0.938	120	614	5635	5922	-3.335	508	5127	595	5327	0
2	19	4	PRP31	YGR091W	10610	14590	130	1019	1218	947	53	61	38	98	92	0	3312	4015	3313	64	111	176	91	85	0	0.297	0.295	0.302	0.343	1.991	0.286	0.94	120	635	4214	5116	-1.749	966	3248	1165	3951	0
2	20	4	PPT1	YGR123C	10810	14590	120	1285	1628	1278	53	60	29	95	92	0	4363	4630	3931	63	92	112	88	84	0	0.287	0.345	0.356	0.426	2.191	0.325	0.919	120	541	5532	6142	-1.803	1232	4300	1575	4567	0
2	21	4	CYS4	YGR155W	11000	14590	130	1484	1653	1255	53	62	36	95	94	0	3854	5368	4540	63	99	132	91	89	0	0.377	0.302	0.308	0.391	2.152	0.281	0.931	120	688	5222	6905	-1.406	1431	3791	1600	5305	0
2	1	5	SET1	YHR119W	7020	14840	120	1383	2549	2646	48	52	23	97	97	0	1344	2562	2618	62	68	61	88	84	0	1.041	1	0.96	0.986	2.596	1.009	0.885	120	618	2617	5001	0.058	1335	1282	2501	2500	0
2	2	5	YHR149C	YHR149C	7200	14830	110	396	663	679	49	56	36	82	73	0	617	1141	1296	65	75	64	80	68	0	0.629	0.571	0.551	0.67	3.343	0.519	0.889	80	513	899	1690	-0.67	347	552	614	1076	0
2	3	5	YHR181W	YHR181W	7410	14830	130	280	359	259	50	55	26	87	78	0	1129	1279	1018	62	73	51	82	78	0	0.216	0.254	0.247	0.256	2.065	0.242	0.887	120	618	1297	1526	-2.214	230	1067	309	1217	0
2	4	5	YHR121W	YHR121W	7590	14830	120	305	555	525	51	57	36	90	83	0	899	1769	1936	63	78	84	82	75	0	0.304	0.295	0.304	0.381	2.584	0.269	0.911	120	575	1090	2210	-1.719	254	836	504	1706	0
2	5	5	YHR151C	YHR151C	7820	14830	120	151	312	427	51	53	13	80	74	0	344	997	1545	65	69	34	80	76	0	0.358	0.28	0.263	0.26	2.587	0.269	0.936	120	618	379	1193	-1.48	100	279	261	932	0
2	6	5	GND1	YHR183W	7990	14820	100	516	567	415	51	58	52	88	80	0	780	882	719	65	74	77	80	75	0	0.65	0.632	0.629	0.776	2.391	0.577	0.87	80	443	1180	1333	-0.621	465	715	516	817	0
2	7	5	EPT1	YHR123W	8200	14820	100	158	477	629	52	55	19	82	71	0	253	977	1350	64	71	64	73	60	0	0.561	0.465	0.398	0.486	2.518	0.451	0.914	80	480	295	1338	-0.834	106	189	425	913	0
2	8	5	SPO16	YHR153C	8410	14820	120	394	822	963	51	57	33	89	80	0	652	1808	2391	63	73	69	83	76	0	0.582	0.442	0.45	0.56	2.525	0.4	0.906	120	622	932	2516	-0.78	343	589	771	1745	0
2	9	5	ADY1	YHR185C	8620	14820	100	160	388	431	50	53	17	88	76	0	304	793	982	64	72	54	72	66	0	0.458	0.464	0.439	0.443	2.253	0.428	0.889	80	500	350	1067	-1.126	110	240	338	729	0
2	10	5	YHR125W	YHR125W	8830	14820	120	683	933	836	51	60	47	93	85	0	2615	5375	5320	64	86	120	95	90	0	0.248	0.166	0.177	0.203	2.239	0.155	0.896	120	596	3183	6193	-2.013	632	2551	882	5311	0
2	11	5	YHR155W	YHR155W	9020	14820	120	285	510	533	51	55	24	90	82	0	918	2528	3186	62	72	51	84	83	0	0.273	0.186	0.209	0.267	2.477	0.166	0.917	120	551	1090	2925	-1.871	234	856	459	2466	0
2	12	5	IKI1	YHR187W	9210	14810	120	155	260	247	52	59	72	62	37	0	370	773	925	63	73	78	80	69	0	0.336	0.293	0.282	0.329	2.465	0.259	0.867	120	564	410	918	-1.576	103	307	208	710	0
2	13	5	YHC3	YJL059W	9410	14810	120	905	1735	1915	52	62	84	87	80	0	1618	2880	3232	64	73	62	83	75	0	0.549	0.598	0.597	0.788	2.886	0.584	0.935	120	577	2407	4499	-0.865	853	1554	1683	2816	0
2	14	5	YJL091C	YJL091C	9610	14800	100	524	909	1004	53	56	20	85	81	0	497	1434	1695	65	70	34	70	68	0	1.09	0.625	0.58	0.614	2.275	0.595	0.935	80	475	903	2225	0.125	471	432	856	1369	0
2	15	5	YJL123C	YJL123C	9810	14800	120	1038	1839	1690	53	62	38	94	90	0	2742	6170	6233	64	95	140	82	75	0	0.368	0.292	0.3	0.419	2.7	0.274	0.949	120	557	3663	7892	-1.443	985	2678	1786	6106	0
2	16	5	NUP82	YJL061W	10010	14800	120	1109	1688	1622	53	63	44	94	87	0	2375	3858	3983	63	104	161	80	71	0	0.457	0.431	0.443	0.577	2.476	0.406	0.924	120	584	3368	5430	-1.131	1056	2312	1635	3795	0
2	17	5	TOK1	YJL093C	10230	14800	130	362	987	1111	52	57	30	89	79	0	1051	5019	6100	63	83	135	83	74	0	0.314	0.189	0.19	0.237	2.738	0.177	0.916	120	606	1298	5891	-1.672	310	988	935	4956	0
2	18	5	GCD14	YJL125C	10390	14790	130	1826	1905	1439	54	83	99	90	84	0	5285	6905	5810	65	212	504	81	73	0	0.339	0.271	0.277	0.35	2.116	0.251	0.938	120	659	6992	8691	-1.559	1772	5220	1851	6840	0
2	19	5	MRPL8	YJL063C	10650	14790	120	194	422	426	53	83	102	55	43	0	675	1939	2213	64	206	512	58	39	0	0.231	0.197	0.189	0.243	3.052	0.185	0.937	120	588	752	2244	-2.115	141	611	369	1875	0
2	20	5	BCK1	YJL095W	10820	14790	120	1018	3250	4335	51	86	247	76	65	0	1149	3319	4305	62	101	276	71	60	0	0.89	0.982	0.994	1.033	2.336	0.998	0.913	120	551	2054	6456	-0.169	967	1087	3199	3257	0
2	21	5	SPT10	YJL127C	11020	14780	100	277	419	378	51	87	256	45	32	0	654	984	1009	62	108	293	58	50	0	0.382	0.399	0.382	0.424	2.79	0.368	0.923	80	487	818	1290	-1.389	226	592	368	922	0
2	1	6	YJL065C	YJL065C	7010	15040	120	832	1058	893	49	63	51	89	81	0	1955	2537	2349	64	109	182	77	68	0	0.414	0.408	0.418	0.533	2.799	0.372	0.87	120	663	2674	3482	-1.272	783	1891	1009	2473	0
2	2	6	YJL097W	YJL097W	7240	15040	130	244	388	317	49	65	53	81	63	0	1514	2545	2434	65	126	198	79	72	0	0.135	0.137	0.136	0.175	2.902	0.126	0.862	120	648	1644	2819	-2.894	195	1449	339	2480	0
2	3	6	TRK1	YJL129C	7410	15030	130	1000	1729	1839	50	55	23	93	90	0	1778	4152	4755	62	80	85	85	75	0	0.554	0.411	0.421	0.535	2.775	0.386	0.937	120	596	2666	5769	-0.853	950	1716	1679	4090	0
2	4	6	OAR1	YKL055C	7640	15040	140	721	1358	1432	51	55	21	94	91	0	679	1723	1920	64	76	51	80	76	0	1.089	0.788	0.769	0.946	2.624	0.751	0.907	156	681	1285	2966	0.124	670	615	1307	1659	0
2	5	6	CYT2	YKL087C	7820	15030	130	433	785	776	50	54	24	91	88	0	972	2409	2663	62	74	62	85	79	0	0.421	0.313	0.301	0.387	2.584	0.288	0.912	120	543	1293	3082	-1.249	383	910	735	2347	0
2	6	6	YKL118W	YKL118W	8010	15020	130	1530	1422	1027	52	71	72	80	76	0	1735	1471	1084	64	98	114	76	71	0	0.885	0.974	0.948	0.948	2.109	0.977	0.909	120	620	3149	2777	-0.177	1478	1671	1370	1407	0
2	7	6	NUP120	YKL057C	8200	15020	120	955	1643	1775	51	73	73	85	75	0	875	1662	1889	63	90	100	73	67	0	1.113	0.996	0.966	1.102	2.375	0.957	0.885	120	597	1716	3191	0.155	904	812	1592	1599	0
2	8	6	MIF2	YKL089W	8410	15020	120	396	983	1202	53	59	31	95	92	0	833	2990	4177	65	76	48	94	90	0	0.447	0.318	0.331	0.417	2.339	0.286	0.92	120	615	1111	3855	-1.163	343	768	930	2925	0
2	9	6	OAC1	YKL120W	8630	15010	110	305	880	1054	51	56	29	87	82	0	359	1195	1441	64	73	46	81	73	0	0.861	0.733	0.635	0.676	1.837	0.722	0.909	80	556	549	1960	-0.216	254	295	829	1131	0
2	10	6	YKL059C	YKL059C	8820	15020	120	671	1977	2417	51	55	20	96	94	0	819	3612	4617	65	72	39	94	93	0	0.822	0.543	0.553	0.664	2.555	0.506	0.854	120	603	1374	5473	-0.282	620	754	1926	3547	0
2	11	6	YKL091C	YKL091C	9030	15010	110	172	475	530	53	63	76	65	45	0	451	1894	2557	67	82	85	75	65	0	0.31	0.231	0.248	0.331	2.865	0.21	0.954	80	540	503	2249	-1.69	119	384	422	1827	0
2	12	6	SRP21	YKL122C	9230	15010	110	322	651	633	53	60	77	78	62	0	637	1260	1282	66	75	80	73	68	0	0.471	0.501	0.494	0.542	2.26	0.494	0.932	80	485	840	1792	-1.086	269	571	598	1194	0
2	13	6	YKL061W	YKL061W	9400	15010	120	2779	3516	2939	53	119	206	87	78	0	1291	1886	1653	65	111	144	83	69	0	2.223	1.902	1.932	2.142	1.863	1.874	0.908	120	585	3952	5284	1.153	2726	1226	3463	1821	0
2	14	6	MBR1	YKL093W	9630	15010	130	4009	5393	4691	54	118	198	91	86	0	3197	4463	4020	66	114	152	87	82	0	1.263	1.214	1.257	1.489	2.234	1.208	0.917	120	710	7086	9736	0.337	3955	3131	5339	4397	0
2	15	6	SSH4	YKL124W	9840	15010	120	2773	4461	4154	53	73	88	95	90	0	3093	5628	5496	64	96	130	89	84	0	0.898	0.792	0.811	0.993	2.247	0.771	0.931	120	545	5749	9972	-0.155	2720	3029	4408	5564	0
2	16	6	YLR040C	YLR040C	10020	15000	120	682	1410	1494	53	62	45	91	87	0	777	2558	2968	64	87	95	85	72	0	0.882	0.544	0.547	0.717	2.424	0.505	0.922	120	581	1342	3851	-0.181	629	713	1357	2494	0
2	17	6	YLR072W	YLR072W	10240	14990	90	231	502	517	51	59	33	84	76	0	537	1176	1304	65	85	128	78	69	0	0.381	0.406	0.391	0.456	2.479	0.373	0.844	52	406	652	1562	-1.391	180	472	451	1111	0
2	18	6	YLR104W	YLR104W	10450	14990	100	362	1059	1260	51	63	51	85	71	0	412	1864	2300	64	92	161	71	51	0	0.894	0.56	0.511	0.585	2.308	0.545	0.947	80	443	659	2808	-0.162	311	348	1008	1800	0
2	19	6	YLR042C	YLR042C	10610	14990	120	1387	1963	1770	51	69	70	91	85	0	1697	3641	3624	63	109	267	75	60	0	0.818	0.534	0.568	0.728	2.325	0.496	0.941	120	594	2970	5490	-0.29	1336	1634	1912	3578	0
2	20	6	YLR074C	YLR074C	10820	14990	110	378	691	636	52	78	157	62	51	0	807	2285	2491	66	115	206	63	57	0	0.44	0.288	0.278	0.39	2.342	0.265	0.95	80	539	1067	2858	-1.185	326	741	639	2219	0
2	21	6	YLR106C	YLR106C	11020	14990	120	671	1338	1511	52	57	23	92	83	0	868	2004	2372	63	91	387	58	50	0	0.769	0.663	0.663	0.728	2.203	0.639	0.95	120	642	1424	3227	-0.379	619	805	1286	1941	0
2	1	7	PDC1	YLR044C	7010	15240	120	486	1511	1765	48	53	22	95	89	0	671	1974	2455	62	68	51	84	71	0	0.719	0.765	0.782	0.943	2.979	0.716	0.876	120	640	1047	3375	-0.476	438	609	1463	1912	0
2	2	7	YLR076C	YLR076C	7220	15240	120	370	628	562	51	60	32	88	80	0	827	1638	1709	63	94	107	83	74	0	0.418	0.366	0.371	0.406	2.333	0.325	0.891	120	577	1083	2152	-1.26	319	764	577	1575	0
2	3	7	YLR108C	YLR108C	7420	15230	120	339	764	940	51	60	32	79	75	0	786	2000	2605	63	95	107	75	67	0	0.398	0.368	0.358	0.394	2.617	0.349	0.905	120	556	1011	2650	-1.328	288	723	713	1937	0
2	4	7	YLR046C	YLR046C	7630	15230	120	348	476	380	49	52	14	93	88	0	1838	2848	2794	65	77	52	89	85	0	0.169	0.153	0.15	0.191	2.683	0.134	0.874	120	556	2072	3210	-2.568	299	1773	427	2783	0
2	5	7	BOS1	YLR078C	7820	15230	120	1858	2120	1756	49	66	62	86	83	0	2060	3368	3121	64	100	128	80	71	0	0.906	0.627	0.62	0.794	2.695	0.571	0.877	120	542	3805	5375	-0.142	1809	1996	2071	3304	0
2	6	7	YLR110C	YLR110C	8010	15230	120	362	629	593	50	72	68	76	69	0	1281	2858	3072	64	128	181	75	67	0	0.256	0.207	0.211	0.274	2.6	0.19	0.92	120	581	1529	3373	-1.964	312	1217	579	2794	0
2	7	7	YLR423C	YLR423C	8240	15230	120	1593	2501	2422	51	59	30	92	87	0	1629	3400	3511	62	117	238	71	65	0	0.984	0.734	0.733	1.003	2.906	0.698	0.923	120	557	3109	5788	-0.023	1542	1567	2450	3338	0
2	8	7	YLR455W	YLR455W	8430	15220	120	1542	2351	2272	52	57	25	93	90	0	1597	3275	3359	62	80	176	74	65	0	0.971	0.716	0.726	0.914	2.542	0.682	0.932	120	565	3025	5512	-0.043	1490	1535	2299	3213	0
2	9	7	PSP2	YML017W	8650	15220	80	276	481	553	50	52	13	86	82	0	362	947	1189	64	66	30	78	73	0	0.758	0.488	0.514	0.576	2.482	0.449	0.866	52	318	524	1314	-0.399	226	298	431	883	0
2	10	7	TUS1	YLR425W	8810	15210	110	681	1380	1581	51	55	22	93	88	0	1442	2995	3450	65	73	48	86	81	0	0.458	0.454	0.478	0.594	2.686	0.447	0.94	80	495	2007	4259	-1.128	630	1377	1329	2930	0
2	11	7	NBP1	YLR457C	9010	15210	110	1129	2234	2472	54	66	50	90	87	0	1872	3366	3701	68	90	95	77	75	0	0.596	0.661	0.645	0.748	2.217	0.663	0.952	80	554	2879	5478	-0.747	1075	1804	2180	3298	0
2	12	7	OST6	YML019W	9220	15210	120	1520	1872	1492	54	67	48	94	87	0	3343	3628	3120	66	94	102	84	79	0	0.447	0.51	0.51	0.618	2.278	0.481	0.928	120	649	4743	5380	-1.16	1466	3277	1818	3562	0
2	13	7	YLR427W	YLR427W	9450	15210	120	424	1339	1551	52	73	96	74	61	0	1538	4238	5167	65	92	113	85	78	0	0.253	0.308	0.303	0.341	2.204	0.291	0.902	120	616	1845	5460	-1.985	372	1473	1287	4173	0
2	14	7	CDC91	YLR459W	9650	15210	120	406	1204	1521	52	56	35	90	80	0	659	3228	4387	63	71	68	82	78	0	0.594	0.364	0.371	0.49	2.959	0.339	0.909	120	513	950	4317	-0.752	354	596	1152	3165	0
2	15	7	UNG1	YML021C	9820	15200	130	863	1229	1182	52	60	34	89	83	0	1803	4704	5052	63	98	133	82	69	0	0.466	0.254	0.256	0.348	2.389	0.234	0.938	120	582	2551	5818	-1.101	811	1740	1177	4641	0
2	16	7	CRN1	YLR429W	10040	15200	120	1713	2763	2659	54	66	47	94	91	0	3042	5841	5897	63	105	133	85	80	0	0.557	0.469	0.493	0.632	2.564	0.45	0.944	120	588	4638	8487	-0.845	1659	2979	2709	5778	0
2	17	7	PAU4	YLR461W	10240	15200	130	8491	9495	7150	53	70	97	99	95	0	10929	12126	9461	64	107	237	92	90	0	0.777	0.783	0.791	0.922	1.945	0.765	0.928	120	687	19303	21504	-0.365	8438	10865	9442	12062	0
2	18	7	YML023C	YML023C	10450	15190	120	1172	2908	3084	52	71	99	85	78	0	934	3357	3659	63	101	241	72	59	0	1.286	0.867	0.851	1.039	2.419	0.852	0.932	120	633	1991	6150	0.363	1120	871	2856	3294	0
2	19	7	YMR187C	YMR187C	10650	15190	90	447	1096	1214	53	65	43	92	82	0	599	1452	1726	65	77	58	80	73	0	0.738	0.752	0.828	0.938	2.277	0.712	0.933	52	399	928	2430	-0.439	394	534	1043	1387	0
2	20	7	TRS130	YMR218C	10840	15180	90	164	254	197	52	55	18	82	73	0	287	477	418	64	68	30	73	69	0	0.502	0.489	0.455	0.432	2.235	0.464	0.871	52	379	335	615	-0.994	112	223	202	413	0
2	21	7	YMR251W	YMR251W	11020	15180	150	58	73	41	51	64	115	3	0	0	70	129	138	62	104	440	3	0	0	0.875	0.328	0.308	0.4	3.411	0.011	0.031	156	893	15	89	-0.193	7	8	22	67	-50
2	1	8	GCV2	YMR189W	7040	15440	120	146	377	451	48	50	13	84	80	0	149	365	451	61	64	57	54	45	0	1.114	1.082	1.078	1.119	2.769	1.017	0.841	120	626	186	633	0.155	98	88	329	304	0
2	2	8	ERG8	YMR220W	7250	15440	120	289	1233	2107	49	53	19	90	83	0	564	2140	3677	61	68	52	85	78	0	0.477	0.57	0.517	0.516	2.612	0.553	0.874	120	512	743	3263	-1.068	240	503	1184	2079	0
2	3	8	YMR252C	YMR252C	7430	15430	150	143	398	489	50	57	28	70	60	0	351	1199	1584	64	86	87	66	53	0	0.324	0.307	0.326	0.371	2.738	0.294	0.891	156	716	380	1483	-1.626	93	287	348	1135	0
2	4	8	YMR191W	YMR191W	7620	15430	80	148	276	273	48	57	33	73	63	0	659	1085	1244	68	125	250	63	53	0	0.169	0.224	0.212	0.234	2.455	0.211	0.761	52	326	691	1245	-2.563	100	591	228	1017	0
2	5	8	YMR222C	YMR222C	7870	15410	90	161	382	401	50	54	24	86	71	0	659	2225	2730	64	87	101	75	65	0	0.187	0.154	0.14	0.172	2.644	0.139	0.868	52	379	706	2493	-2.422	111	595	332	2161	0
2	6	8	YMR254C	YMR254C	8050	15420	130	520	1398	1496	51	59	34	88	83	0	576	1433	1625	63	86	96	68	62	0	0.914	0.983	0.981	0.991	2.563	0.94	0.885	120	606	982	2717	-0.129	469	513	1347	1370	0
2	7	8	YMR193C-A	YMR193C-A	8230	15410	130	505	554	447	51	65	45	76	70	0	955	1838	1674	63	102	158	80	67	0	0.509	0.283	0.274	0.291	2.581	0.249	0.846	120	512	1346	2278	-0.974	454	892	503	1775	0
2	8	8	MRE11	YMR224C	8410	15410	150	73	153	174	51	60	36	39	30	0	84	326	449	64	100	207	27	21	0	1.1	0.389	0.415	0.458	2.634	0.306	0.761	156	722	42	364	0.138	22	20	102	262	-50
2	9	8	COX7	YMR256C	8650	15420	120	397	632	517	50	53	15	95	92	0	635	959	811	64	68	42	87	83	0	0.608	0.65	0.625	0.708	2.249	0.627	0.851	120	624	918	1477	-0.719	347	571	582	895	0
2	10	8	NAR1	YNL240C	8840	15410	130	274	469	426	52	57	24	83	76	0	1010	2238	2223	66	84	84	80	73	0	0.235	0.192	0.19	0.212	2.681	0.183	0.888	120	642	1166	2589	-2.088	222	944	417	2172	0
2	11	8	SEC2	YNL272C	9030	15410	130	769	1837	2254	51	62	46	91	88	0	1249	2590	3234	65	93	107	82	71	0	0.606	0.707	0.764	0.91	2.737	0.686	0.889	120	619	1902	4311	-0.722	718	1184	1786	2525	0
2	12	8	YPT11	YNL304W	9230	15410	130	381	671	719	51	61	33	84	80	0	1676	3111	3743	64	100	132	85	78	0	0.205	0.203	0.2	0.234	2.498	0.181	0.846	120	621	1942	3667	-2.288	330	1612	620	3047	0
2	13	8	YNL242W	YNL242W	9420	15400	110	2214	3007	2901	54	77	123	87	77	0	2758	4248	4418	67	138	299	77	70	0	0.803	0.706	0.697	0.869	3.425	0.646	0.891	80	528	4851	7134	-0.317	2160	2691	2953	4181	0
2	14	8	YNL274C	YNL274C	9640	15410	120	1303	1960	1745	53	76	123	86	78	0	2657	3710	3505	66	129	291	73	69	0	0.482	0.523	0.548	0.705	3.046	0.493	0.885	120	572	3841	5551	-1.052	1250	2591	1907	3644	0
2	15	8	YNL306W	YNL306W	9830	15400	130	398	493	398	53	67	53	75	65	0	2027	3209	2894	65	151	268	77	69	0	0.176	0.14	0.142	0.166	2.636	0.131	0.89	120	579	2307	3584	-2.508	345	1962	440	3144	0
2	16	8	SUI1	YNL244C	10020	15400	130	692	896	730	53	71	53	84	77	0	1354	2057	1865	64	157	264	69	62	0	0.495	0.423	0.421	0.484	2.37	0.378	0.851	120	609	1929	2836	-1.013	639	1290	843	1993	0
2	17	8	YNL276C	YNL276C	10210	15390	110	276	370	294	54	70	52	70	65	0	1414	2376	2369	67	158	262	66	57	0	0.165	0.137	0.142	0.199	2.827	0.117	0.856	80	519	1569	2625	-2.601	222	1347	316	2309	0
2	18	8	KRI1	YNL308C	10440	15400	120	689	1752	2136	52	60	38	92	87	0	868	2495	3144	64	126	265	69	62	0	0.792	0.699	0.72	0.78	2.455	0.675	0.918	120	605	1441	4131	-0.336	637	804	1700	2431	0
2	19	8	YNL246W	YNL246W	10620	15380	130	1551	1681	1281	54	84	131	81	73	0	3558	4322	3733	63	164	492	73	65	0	0.428	0.382	0.379	0.472	2.304	0.341	0.903	120	633	4992	5886	-1.223	1497	3495	1627	4259	0
2	20	8	YNL278W	YNL278W	10830	15390	120	1144	1800	1752	53	97	188	78	66	0	3168	5517	5721	65	203	585	70	64	0	0.352	0.32	0.33	0.436	2.874	0.296	0.883	120	658	4194	7199	-1.508	1091	3103	1747	5452	0
2	21	8	YNL310C	YNL310C	11060	15390	130	357	825	864	51	69	140	75	55	0	1206	2755	2979	62	107	350	75	64	0	0.267	0.287	0.279	0.318	2.034	0.283	0.891	120	680	1450	3467	-1.902	306	1144	774	2693	0
2	1	9	YOR042W	YOR042W	7030	15630	120	173	350	379	48	49	13	87	80	0	520	1050	1194	61	65	75	72	68	0	0.272	0.305	0.291	0.314	2.548	0.296	0.874	120	592	584	1291	-1.877	125	459	302	989	0
2	2	9	CDC21	YOR074C	7230	15630	120	354	652	716	49	53	33	80	73	0	521	1038	1138	62	67	56	73	68	0	0.664	0.618	0.604	0.571	2.512	0.607	0.877	120	544	764	1579	-0.59	305	459	603	976	0
2	3	9	VAM3	YOR106W	7430	15630	130	491	642	516	49	53	20	93	88	0	2247	3268	2930	63	76	65	89	87	0	0.202	0.185	0.189	0.226	2.302	0.171	0.894	120	609	2626	3798	-2.305	442	2184	593	3205	0
2	4	9	YOR044W	YOR044W	7640	15630	120	1820	2455	2094	49	78	217	84	77	0	1357	2269	2056	63	102	267	75	66	0	1.369	1.091	1.078	1.218	2.358	1.059	0.868	120	589	3065	4612	0.453	1771	1294	2406	2206	0
2	5	9	YOR076C	YOR076C	7830	15630	120	487	1283	1640	50	78	217	70	50	0	512	1562	2162	64	100	269	62	45	0	0.975	0.823	0.852	1.076	2.733	0.764	0.881	120	590	885	2731	-0.036	437	448	1233	1498	0
2	6	9	YOR108W	YOR108W	8020	15620	110	231	330	246	49	53	18	92	88	0	618	1148	1109	64	69	42	86	80	0	0.329	0.259	0.264	0.344	2.534	0.228	0.906	80	505	736	1365	-1.606	182	554	281	1084	0
2	7	9	DBP5	YOR046C	8220	15620	120	1112	1864	1919	51	61	36	95	90	0	1272	2633	2930	65	90	132	80	75	0	0.879	0.706	0.727	0.899	2.349	0.664	0.926	120	612	2268	4381	-0.186	1061	1207	1813	2568	0
2	8	9	YOR078W	YOR078W	8430	15620	130	1908	2697	2287	51	67	57	95	90	0	3414	4238	3752	66	99	127	87	82	0	0.555	0.634	0.717	0.795	2.281	0.604	0.884	120	637	5205	6818	-0.85	1857	3348	2646	4172	0
2	9	9	YOR110W	YOR110W	8620	15610	100	819	1440	1381	52	69	65	93	86	0	1351	2632	2765	68	104	135	86	77	0	0.598	0.541	0.545	0.635	2.064	0.504	0.908	80	454	2050	3952	-0.742	767	1283	1388	2564	0
2	10	9	RAT1	YOR048C	8850	15610	80	150	177	126	52	53	13	82	78	0	184	304	328	65	64	20	80	71	0	0.824	0.523	0.538	0.537	2.5	0.385	0.743	52	326	217	364	-0.28	98	119	125	239	0
2	11	9	YOR080W	YOR080W	9030	15610	120	878	2174	2717	51	56	22	97	95	0	1018	3032	3798	65	72	44	90	88	0	0.868	0.716	0.714	0.846	2.327	0.708	0.937	120	571	1780	5090	-0.205	827	953	2123	2967	0
2	12	9	YOR112W	YOR112W	9230	15610	120	437	1046	1302	51	67	73	83	69	0	966	2692	3652	66	110	380	64	55	0	0.429	0.379	0.376	0.474	2.547	0.352	0.925	120	616	1286	3621	-1.221	386	900	995	2626	0
2	13	9	PHO85	YPL031C	9470	15610	130	614	1598	1822	52	77	127	88	65	0	706	2697	3214	66	125	410	68	45	0	0.878	0.588	0.577	0.673	2.519	0.54	0.861	120	646	1202	4177	-0.188	562	640	1546	2631	0
2	14	9	YPL063W	YPL063W	9640	15600	130	418	657	613	51	57	36	87	80	0	2020	3456	3375	65	100	193	78	71	0	0.188	0.179	0.184	0.219	2.961	0.173	0.914	120	554	2322	3997	-2.413	367	1955	606	3391	0
2	15	9	YPL095C	YPL095C	9830	15600	120	1200	1908	1727	52	63	41	97	95	0	2125	3670	3609	66	107	169	88	86	0	0.558	0.515	0.507	0.591	2.177	0.484	0.928	120	555	3207	5460	-0.843	1148	2059	1856	3604	0
2	16	9	YPL033C	YPL033C	10050	15600	120	921	1616	1505	52	67	50	91	87	0	1444	2922	2991	65	101	131	86	80	0	0.63	0.547	0.546	0.645	2.279	0.51	0.919	120	562	2248	4421	-0.666	869	1379	1564	2857	0
2	17	9	VPS28	YPL065W	10230	15590	130	2919	3361	2843	51	69	72	89	87	0	3485	5087	4617	65	116	188	80	75	0	0.839	0.659	0.668	0.84	2.43	0.624	0.905	120	593	6288	8332	-0.254	2868	3420	3310	5022	0
2	18	9	MSY1	YPL097W	10410	15590	110	2134	3851	3810	55	107	156	87	80	0	2955	6775	6854	68	200	460	73	65	0	0.72	0.566	0.608	0.691	2.003	0.549	0.924	80	505	4966	10503	-0.474	2079	2887	3796	6707	0
2	19	9	YPL035C	YPL035C	10640	15590	120	624	1047	888	55	87	121	82	65	0	1121	1856	1611	66	156	386	72	55	0	0.539	0.554	0.56	0.616	2.239	0.548	0.926	120	687	1624	2782	-0.891	569	1055	992	1790	0
2	20	9	YPL067C	YPL067C	10860	15590	120	279	433	342	51	57	31	87	80	0	1215	2413	2209	62	79	70	86	85	0	0.198	0.162	0.157	0.213	3.02	0.151	0.899	120	609	1381	2733	-2.338	228	1153	382	2351	0
2	21	9	YPL099C	YPL099C	11060	15580	130	229	729	905	50	54	27	85	71	0	605	2622	3454	60	65	42	86	82	0	0.328	0.265	0.263	0.3	2.408	0.259	0.927	120	658	724	3241	-1.606	179	545	679	2562	0
2	1	10	EGD1	YPL037C	7030	15830	140	117	151	103	47	49	14	76	63	0	589	1256	1258	62	76	92	74	64	0	0.133	0.087	0.095	0.123	2.776	0.076	0.818	156	840	597	1298	-2.912	70	527	104	1194	0
2	2	10	BTS1	YPL069C	7220	15830	130	1869	2723	2431	50	84	119	90	83	0	1431	3075	3063	66	134	203	85	72	0	1.333	0.888	0.85	1.07	2.125	0.807	0.901	120	623	3184	5682	0.414	1819	1365	2673	3009	0
2	3	10	YPL101W	YPL101W	7450	15830	120	522	1092	1040	49	85	121	78	63	0	2559	4839	4710	65	136	214	85	79	0	0.19	0.218	0.216	0.251	2.523	0.213	0.918	120	585	2967	5817	-2.399	473	2494	1043	4774	0
2	4	10	RPS23B	YPR132W	7640	15830	120	666	1779	2209	49	55	28	93	91	0	798	2304	3114	63	80	94	81	75	0	0.839	0.772	0.762	0.919	2.491	0.717	0.909	120	530	1352	3971	-0.252	617	735	1730	2241	0
2	5	10	KIM3	YPR164W	7830	15820	120	512	1666	2387	51	60	31	88	84	0	743	2630	3777	65	78	53	85	81	0	0.68	0.63	0.632	0.709	2.189	0.618	0.905	120	550	1139	4180	-0.557	461	678	1615	2565	0
2	6	10	YPR196W	YPR196W	8030	15810	110	351	650	707	52	67	66	77	70	0	388	664	749	66	93	139	66	53	0	0.929	1	0.938	0.879	2.278	0.955	0.881	80	571	621	1196	-0.107	299	322	598	598	0
2	7	10	MSS18	YPR134W	8260	15820	130	479	1108	1086	52	65	63	86	80	0	1152	2815	2898	65	91	155	84	78	0	0.393	0.384	0.366	0.399	2.043	0.368	0.921	120	655	1514	3806	-1.348	427	1087	1056	2750	0
2	8	10	MRP2	YPR166C	8430	15810	110	992	841	555	52	62	36	93	92	0	2177	1864	1283	65	90	94	83	80	0	0.445	0.439	0.447	0.548	2.459	0.424	0.928	80	440	3052	2588	-1.168	940	2112	789	1799	0
2	9	10	SGE1	YPR198W	8620	15810	150	60	90	70	52	66	52	23	15	0	79	142	157	66	93	100	21	14	0	0.615	0.5	0.437	0.498	3.129	0.391	0.738	156	853	21	114	-0.7	8	13	38	76	-50
2	10	10	YPR136C	YPR136C	8860	15810	110	779	1111	1050	52	54	15	91	85	0	1176	1625	1637	64	67	36	76	75	0	0.654	0.678	0.684	0.753	2.55	0.65	0.931	80	569	1839	2620	-0.613	727	1112	1059	1561	0
2	11	10	NUT2	YPR168W	9040	15800	100	126	249	279	51	54	19	76	63	0	282	635	864	67	70	29	76	73	0	0.349	0.349	0.333	0.367	2.603	0.307	0.877	80	478	290	766	-1.519	75	215	198	568	0
2	12	10	ARR2	YPR200C	9260	15800	110	66	72	27	49	51	13	56	35	0	109	102	50	64	68	77	25	0	0	0.378	0.605	0.342	0.389	3.109	0.305	0.238	80	529	62	61	-1.404	17	45	23	38	0
2	13	10	MEP3	YPR138C	9450	15800	130	2549	3518	3113	51	70	80	94	90	0	4262	5395	4761	65	121	240	87	82	0	0.595	0.65	0.637	0.71	1.966	0.642	0.923	120	651	6695	8797	-0.749	2498	4197	3467	5330	0
2	14	10	YPR170C	YPR170C	9680	15810	120	107	162	120	52	71	76	40	26	0	445	863	869	67	136	275	65	36	0	0.146	0.138	0.137	0.147	2.516	0.13	0.861	120	552	433	906	-2.781	55	378	110	796	0
2	15	10	YPR202W	YPR202W	9850	15800	150	10499	14479	13323	54	86	178	95	89	0	11476	16827	15159	66	135	377	91	82	0	0.915	0.861	0.882	0.94	2.326	0.871	0.916	156	737	21855	31186	-0.127	10445	11410	14425	16761	0
2	16	10	IntYBR048W	IntYBR048W	10080	15800	120	421	1003	1041	53	90	205	74	45	0	680	1493	1519	65	133	420	65	40	0	0.598	0.665	0.674	0.745	2.099	0.67	0.923	120	542	983	2378	-0.741	368	615	950	1428	0
2	17	10	LSR1	LSR1	10250	15790	120	479	727	686	52	59	45	81	75	0	936	1453	1385	65	78	87	81	75	0	0.49	0.486	0.486	0.492	2.047	0.478	0.915	120	499	1298	2063	-1.028	427	871	675	1388	0
2	18	10	YCLWTy5-1C	YCLWTy5-1C	10440	15790	130	618	1217	1228	53	77	108	87	69	0	1821	3320	3290	67	124	280	83	69	0	0.322	0.358	0.378	0.41	2.211	0.36	0.949	120	692	2319	4417	-1.634	565	1754	1164	3253	0
2	19	10	IntYCR097W-A2	IntYCR097W-A2	10670	15790	80	421	429	297	52	63	62	80	69	0	580	666	478	65	76	81	78	73	0	0.717	0.627	0.59	0.55	1.653	0.63	0.904	52	340	884	978	-0.481	369	515	377	601	0
2	20	10	IntYDL191W	IntYDL191W	10860	15780	90	194	245	158	50	53	15	94	90	0	286	369	281	62	64	25	84	80	0	0.643	0.635	0.652	0.65	1.8	0.569	0.876	52	384	368	502	-0.637	144	224	195	307	0
2	21	10	CEN4	CEN4	11030	15780	100	322	425	326	50	57	30	85	78	0	168	201	138	60	65	43	66	55	0	2.519	2.66	2.513	2.404	3.035	2.512	0.833	80	472	380	516	1.333	272	108	375	141	0
2	1	11	YDRWdelta31	YDRWdelta31	7070	16040	80	120	172	126	47	66	215	25	1	0	155	236	183	64	81	177	40	19	0	0.802	0.727	0.782	0.694	2.539	1.164	0.733	52	311	164	297	-0.318	73	91	125	172	0
2	2	11	YELCtau1	YELCtau1	7240	16030	120	432	702	613	49	74	172	63	53	0	411	653	588	64	86	149	60	55	0	1.104	1.109	1.145	1.277	2.158	1.095	0.862	120	556	730	1242	0.142	383	347	653	589	0
2	3	11	YER039C-A	YER039C-A	7440	16030	130	194	353	310	50	62	39	80	66	0	637	1361	1363	65	103	154	78	64	0	0.252	0.234	0.227	0.262	2.426	0.213	0.85	120	668	716	1599	-1.99	144	572	303	1296	0
2	4	11	YFLWtau1	YFLWtau1	7660	16030	120	1610	2228	1856	50	59	35	95	91	0	1068	1489	1343	64	104	162	73	65	0	1.554	1.528	1.566	1.858	2.914	1.488	0.872	120	574	2564	3603	0.636	1560	1004	2178	1425	0
2	5	11	YFRCdelta9	YFRCdelta9	7850	16020	120	719	921	789	50	59	39	88	80	0	856	1150	1032	62	72	49	80	71	0	0.843	0.801	0.799	0.857	2.491	0.77	0.908	120	596	1463	1959	-0.247	669	794	871	1088	0
2	6	11	YGLWtau2	YGLWtau2	8060	16020	100	533	514	392	51	60	38	80	68	0	994	907	770	64	73	56	67	66	0	0.518	0.549	0.533	0.581	2.252	0.509	0.881	80	517	1412	1306	-0.948	482	930	463	843	0
2	7	11	iYAR061W	iYAR061W	8270	16020	120	1194	1570	1308	51	57	36	93	88	0	1121	1758	1505	64	72	53	85	84	0	1.081	0.897	0.881	1.064	2.562	0.877	0.874	120	554	2200	3213	0.113	1143	1057	1519	1694	0
2	8	11	iYAR068W	iYAR068W	8450	16020	120	656	963	911	51	62	46	86	75	0	932	1797	1833	65	86	129	75	66	0	0.698	0.527	0.535	0.628	2.542	0.493	0.903	120	574	1472	2644	-0.519	605	867	912	1732	0
2	9	11	iYBL111C	iYBL111C	8670	16020	130	3779	8115	9106	50	59	46	100	100	0	3768	9717	11072	65	83	125	94	88	0	1.007	0.836	0.901	1.122	2.429	0.824	0.896	120	639	7432	17717	0.01	3729	3703	8065	9652	0
2	10	11	iYBL098W	iYBL098W	8860	16020	120	481	659	523	51	57	40	90	80	0	1104	1294	1072	65	75	73	85	79	0	0.414	0.495	0.496	0.538	1.888	0.476	0.897	120	547	1469	1837	-1.273	430	1039	608	1229	0
2	11	11	iYBL092W	iYBL092W	9050	16010	120	448	724	668	51	54	20	92	85	0	764	1167	1125	67	72	32	85	77	0	0.57	0.612	0.602	0.656	2.27	0.586	0.902	120	602	1094	1773	-0.812	397	697	673	1100	0
2	12	11	iYBL089W	iYBL089W	9270	16010	130	732	956	928	50	54	21	93	89	0	893	1804	1836	65	73	76	80	73	0	0.824	0.521	0.497	0.616	2.848	0.497	0.893	120	656	1510	2645	-0.28	682	828	906	1739	0
2	13	11	iYBL071C	iYBL071C	9460	16000	120	310	550	536	52	59	46	83	70	0	377	797	820	64	76	86	71	57	0	0.824	0.679	0.684	0.817	2.282	0.649	0.905	120	524	571	1231	-0.279	258	313	498	733	0
2	14	11	iYBL065W	iYBL065W	9630	15990	100	166	181	106	51	56	20	77	71	0	703	613	439	66	77	70	75	71	0	0.181	0.238	0.242	0.248	1.888	0.218	0.859	80	443	752	677	-2.47	115	637	130	547	0
2	15	11	iYBL060W	iYBL060W	9860	16000	120	360	750	719	52	62	70	77	65	0	732	1465	1459	66	92	188	71	61	0	0.462	0.499	0.475	0.495	2.013	0.479	0.902	120	604	974	2097	-1.113	308	666	698	1399	0
2	16	11	iYBL042C	iYBL042C	10070	16000	130	334	782	794	51	57	29	90	85	0	909	1942	2096	65	78	70	82	77	0	0.335	0.389	0.367	0.424	2.636	0.374	0.91	120	605	1127	2608	-1.576	283	844	731	1877	0
2	17	11	iYBL038W	iYBL038W	10260	15990	130	761	936	770	51	59	49	88	78	0	1566	1961	1635	65	78	81	85	80	0	0.473	0.467	0.469	0.483	2.186	0.458	0.922	120	631	2211	2781	-1.08	710	1501	885	1896	0
2	18	11	iYBL034C	iYBL034C	10470	15990	120	110	158	122	51	60	46	54	41	0	601	1079	1108	64	84	94	72	69	0	0.11	0.105	0.121	0.135	2.354	0.098	0.83	120	581	596	1122	-3.186	59	537	107	1015	0
2	19	11	iYBR265W	iYBR265W	10670	15990	120	511	622	483	50	52	14	94	89	0	1030	1436	1264	64	69	44	80	77	0	0.477	0.417	0.412	0.49	2.097	0.385	0.912	120	562	1427	1944	-1.067	461	966	572	1372	0
2	20	11	iYBR270C	iYBR270C	10850	15990	120	417	825	897	50	54	17	91	88	0	830	1567	1716	63	72	47	81	80	0	0.478	0.515	0.489	0.53	2.214	0.511	0.939	120	553	1134	2279	-1.063	367	767	775	1504	0
2	21	11	iYBR274W	iYBR274W	11060	15980	140	176	516	600	50	56	31	76	67	0	178	469	548	63	75	131	47	37	0	1.096	1.148	1.109	1.157	2.738	1.031	0.787	156	815	241	872	0.132	126	115	466	406	0
2	1	12	iYBR291C	iYBR291C	7050	16230	120	333	627	549	49	54	24	92	82	0	534	797	716	63	68	34	88	79	0	0.603	0.787	0.753	0.766	2.363	0.766	0.905	120	676	755	1312	-0.73	284	471	578	734	0
2	2	12	iYBR294W	iYBR294W	7260	16230	130	557	662	522	51	57	28	91	86	0	892	1228	1075	65	72	36	89	85	0	0.612	0.525	0.513	0.584	2.597	0.475	0.823	120	651	1333	1774	-0.709	506	827	611	1163	0
2	3	12	iYBR297W	iYBR297W	7470	16230	110	959	1076	852	50	54	20	97	95	0	793	915	754	65	77	64	77	70	0	1.249	1.207	1.146	1.224	1.932	1.172	0.867	80	554	1637	1876	0.32	909	728	1026	850	0
2	4	12	iYCL061C	iYCL061C	7680	16230	120	136	442	515	49	53	21	83	68	0	655	2306	3024	65	71	49	82	78	0	0.147	0.175	0.175	0.215	3.307	0.158	0.864	120	569	677	2634	-2.762	87	590	393	2241	0
2	5	12	iYCL055W-0	iYCL055W-0	7850	16220	110	252	383	315	49	52	21	96	87	0	548	665	514	62	64	28	91	86	0	0.418	0.554	0.602	0.584	2.492	0.572	0.894	80	464	689	937	-1.259	203	486	334	603	0
2	6	12	iYCL051W	iYCL051W	8030	16220	110	2147	2194	1359	52	61	35	100	100	0	1145	1141	750	65	77	113	90	77	0	1.94	1.991	1.994	2.228	1.736	1.96	0.894	80	564	3175	3218	0.956	2095	1080	2142	1076	0
2	7	12	iYCL029C	iYCL029C	8250	16220	130	493	768	667	52	60	36	89	85	0	991	1483	1308	65	75	52	85	84	0	0.476	0.505	0.522	0.554	2.245	0.489	0.891	120	633	1367	2134	-1.07	441	926	716	1418	0
2	8	12	iYCL025C	iYCL025C	8430	16210	130	521	553	379	51	64	71	80	71	0	1666	1452	1010	66	94	166	83	71	0	0.294	0.362	0.365	0.378	2.328	0.351	0.898	120	616	2070	1888	-1.767	470	1600	502	1386	0
2	9	12	iYCRCdelta6-0	iYCRCdelta6-0	8630	16210	110	236	345	274	52	57	30	87	72	0	669	907	835	67	88	136	73	65	0	0.306	0.349	0.357	0.413	2.593	0.322	0.911	80	505	786	1133	-1.71	184	602	293	840	0
2	10	12	iYDL043C	iYDL043C	8840	16210	120	442	598	498	50	55	24	91	84	0	531	877	786	67	76	48	77	70	0	0.845	0.677	0.702	0.814	2.27	0.637	0.869	120	618	856	1358	-0.243	392	464	548	810	0
2	11	12	iYDL037C-0	iYDL037C-0	9050	16210	120	373	440	328	50	55	26	89	78	0	1020	1610	1463	65	76	57	85	81	0	0.338	0.252	0.25	0.323	2.826	0.223	0.868	120	554	1278	1935	-1.564	323	955	390	1545	0
2	12	12	iYDL032W	iYDL032W	9250	16210	130	290	580	515	50	53	20	92	88	0	525	1154	1122	65	72	46	81	80	0	0.522	0.487	0.488	0.557	2.278	0.457	0.889	120	611	700	1619	-0.939	240	460	530	1089	0
2	13	12	iYDL014W	iYDL014W	9440	16200	130	444	526	401	50	53	16	90	87	0	2345	2536	2105	65	87	348	74	66	0	0.173	0.193	0.2	0.232	2.515	0.18	0.879	120	599	2674	2947	-2.533	394	2280	476	2471	0
2	14	12	iYDL008W	iYDL008W	9630	16190	110	283	277	173	51	54	17	88	81	0	1001	991	860	67	99	364	55	52	0	0.248	0.245	0.231	0.3	3.149	0.131	0.508	80	549	1166	1150	-2.009	232	934	226	924	0
2	15	12	iYDLWtau1	iYDLWtau1	9850	16200	120	253	535	496	50	53	16	91	86	0	548	1526	1576	66	82	111	75	58	0	0.421	0.332	0.356	0.396	2.896	0.305	0.866	120	571	685	1945	-1.248	203	482	485	1460	0
2	16	12	iYDR008C	iYDR008C	10030	16190	130	543	753	625	51	69	69	85	70	0	2285	3020	2704	66	102	138	86	75	0	0.222	0.238	0.248	0.288	2.76	0.219	0.866	120	641	2711	3656	-2.173	492	2219	702	2954	0
2	17	12	iYDR013W	iYDR013W	10280	16190	110	172	586	634	52	74	80	66	46	0	195	736	832	66	93	106	56	41	0	0.93	0.797	0.818	0.845	3.264	0.755	0.817	80	476	249	1204	-0.104	120	129	534	670	0
2	18	12	iYDR016C	iYDR016C	10430	16190	130	2530	3027	2580	52	82	119	93	88	0	1461	2728	2594	64	99	136	85	80	0	1.774	1.117	1.097	1.391	2.498	1.052	0.883	120	597	3875	5639	0.827	2478	1397	2975	2664	0
2	19	12	iYDR032C-0	iYDR032C-0	10640	16190	120	639	578	343	52	83	121	81	70	0	2383	2466	1857	65	107	140	88	78	0	0.253	0.219	0.214	0.285	2.329	0.191	0.831	120	574	2905	2927	-1.981	587	2318	526	2401	0
2	20	12	iYDR034C	iYDR034C	10860	16190	140	445	945	927	51	54	18	91	90	0	1098	3602	3825	64	76	58	88	85	0	0.381	0.253	0.251	0.323	3.109	0.234	0.884	156	641	1428	4432	-1.392	394	1034	894	3538	0
2	21	12	iYDR034C-A	iYDR034C-A	11040	16180	130	4232	4521	3870	50	58	47	97	95	0	5161	6318	5585	62	74	82	88	84	0	0.82	0.715	0.776	0.992	3.075	0.689	0.887	120	624	9281	10727	-0.286	4182	5099	4471	6256	0
2	1	13	iYDR335W	iYDR335W	7080	16440	120	320	1100	1506	49	56	46	95	86	0	301	916	1172	63	67	37	83	79	0	1.139	1.232	1.235	1.357	2.305	1.281	0.919	120	551	509	1904	0.187	271	238	1051	853	0
2	2	13	iYDR339C	iYDR339C	7230	16430	150	57	94	106	48	53	21	30	19	0	74	153	244	64	68	32	27	19	0	0.9	0.517	0.433	0.446	3.072	0.421	0.848	156	719	19	135	-0.152	9	10	46	89	-50
2	3	13	iYDR342C-1	iYDR342C-1	7440	16430	110	238	228	107	49	67	186	51	2	0	497	441	266	65	79	160	75	58	0	0.438	0.476	0.456	0.442	1.874	0.418	0.828	80	580	621	555	-1.193	189	432	179	376	0
2	4	13	iYDR354W	iYDR354W	7680	16430	120	146	280	303	49	67	180	30	20	0	236	507	617	67	84	159	52	29	0	0.574	0.525	0.504	0.542	1.961	0.632	0.741	120	618	266	671	-0.801	97	169	231	440	0
2	5	13	iYDR360W	iYDR360W	7880	16420	120	100	161	134	49	54	27	60	48	0	501	1393	1703	67	91	134	75	62	0	0.118	0.084	0.086	0.101	2.797	0.074	0.838	120	613	485	1438	-3.089	51	434	112	1326	0
2	6	13	itK(CUU)D1	itK(CUU)D1	8090	16420	100	105	209	188	49	56	29	71	45	0	317	989	1176	66	99	155	71	47	0	0.223	0.173	0.159	0.193	2.551	0.152	0.87	80	456	307	1083	-2.164	56	251	160	923	0
2	7	13	iYDR379W	iYDR379W	8270	16420	130	319	512	431	51	62	65	75	65	0	1189	2641	2595	65	96	162	83	76	0	0.238	0.179	0.178	0.221	2.361	0.163	0.908	120	639	1392	3037	-2.068	268	1124	461	2576	0
2	8	13	iYDR383C	iYDR383C	8490	16420	110	209	434	425	51	64	73	75	52	0	369	890	999	66	102	217	61	38	0	0.521	0.465	0.465	0.636	2.814	0.426	0.893	80	494	461	1207	-0.939	158	303	383	824	0
2	9	13	iYDR387C	iYDR387C	8660	16410	150	278	574	673	50	54	28	82	75	0	467	1035	1239	66	81	112	70	64	0	0.569	0.541	0.478	0.528	2.503	0.522	0.873	156	715	629	1493	-0.815	228	401	524	969	0
2	10	13	iYDR404C	iYDR404C	8850	16420	110	102	301	298	50	51	13	75	65	0	550	1857	2160	67	74	42	80	77	0	0.108	0.14	0.131	0.144	2.824	0.129	0.893	80	470	535	2041	-3.215	52	483	251	1790	0
2	11	13	iYDR408C	iYDR408C	9050	16410	150	102	339	465	51	55	23	61	51	0	244	1488	2364	69	85	90	60	49	0	0.291	0.203	0.201	0.237	2.617	0.191	0.926	156	781	226	1707	-1.779	51	175	288	1419	0
2	12	13	iYDR413C	iYDR413C	9260	16390	90	423	413	269	52	56	22	88	82	0	1414	1353	1004	70	101	132	76	75	0	0.276	0.281	0.278	0.303	2.134	0.27	0.937	52	377	1715	1644	-1.857	371	1344	361	1283	0
2	13	13	itS(UGA)E-0	itS(UGA)E-0	9450	16400	130	534	797	701	51	55	19	89	86	0	1904	2453	2145	66	98	342	72	66	0	0.263	0.313	0.297	0.328	2.636	0.312	0.945	120	635	2321	3133	-1.928	483	1838	746	2387	0
2	14	13	iYER068W	iYER068W	9660	16400	120	265	423	359	50	54	18	95	91	0	728	1114	968	65	95	352	63	49	0	0.324	0.356	0.36	0.382	2.095	0.354	0.922	120	589	878	1422	-1.625	215	663	373	1049	0
2	15	13	iYER072W	iYER072W	9860	16400	120	265	426	381	49	51	13	91	85	0	507	893	875	64	77	111	71	64	0	0.488	0.455	0.411	0.464	2.507	0.42	0.886	120	527	659	1206	-1.036	216	443	377	829	0
2	16	13	iYER087W	iYER087W	10050	16390	130	852	1216	1061	50	58	34	93	90	0	1338	1806	1629	64	87	117	82	70	0	0.63	0.669	0.675	0.798	2.504	0.654	0.967	120	633	2076	2908	-0.668	802	1274	1166	1742	0
2	17	13	iYER090W	iYER090W	10260	16390	120	1725	1501	1021	51	65	47	94	88	0	1425	1269	860	66	89	106	82	76	0	1.232	1.205	1.16	1.193	1.767	1.204	0.933	120	635	3033	2653	0.301	1674	1359	1450	1203	0
2	18	13	iYER093C	iYER093C	10480	16380	110	265	342	270	52	70	79	62	56	0	910	1071	924	66	100	142	73	58	0	0.252	0.289	0.277	0.282	1.933	0.279	0.91	80	483	1057	1295	-1.986	213	844	290	1005	0
2	19	13	iYER106W	iYER106W	10640	16380	130	723	1289	1223	51	63	47	88	78	0	975	1711	1684	64	87	90	80	66	0	0.738	0.752	0.749	0.827	2.282	0.725	0.942	120	613	1583	2885	-0.439	672	911	1238	1647	0
2	20	13	iYER110C	iYER110C	10860	16380	120	461	691	617	51	61	40	87	79	0	860	1278	1195	64	80	68	84	72	0	0.515	0.527	0.519	0.541	1.934	0.511	0.946	120	539	1206	1854	-0.957	410	796	640	1214	0
2	21	13	iYER114C	iYER114C	11050	16380	120	261	381	321	51	55	31	77	71	0	1042	1421	1338	65	78	63	85	77	0	0.215	0.243	0.244	0.255	1.917	0.234	0.941	120	603	1187	1686	-2.218	210	977	330	1356	0
2	1	14	iYER131W	iYER131W	7060	16640	120	1815	1644	1077	48	52	22	100	98	0	1505	1374	944	63	64	29	92	89	0	1.225	1.217	1.258	1.427	2.106	1.2	0.887	120	631	3209	2907	0.293	1767	1442	1596	1311	0
2	2	14	iYERCdelta14	iYERCdelta14	7260	16630	110	415	392	197	49	54	24	92	88	0	1624	1459	842	67	73	50	92	90	0	0.235	0.246	0.248	0.262	1.878	0.226	0.886	80	531	1923	1735	-2.089	366	1557	343	1392	0
2	3	14	itK(CUU)E2	itK(CUU)E2	7470	16620	90	381	366	186	49	52	17	96	94	0	902	823	475	66	69	27	98	94	0	0.397	0.419	0.425	0.465	2.14	0.37	0.822	52	410	1168	1074	-1.332	332	836	317	757	0
2	4	14	iYGL186C	iYGL186C	7670	16630	120	296	328	224	48	53	59	77	65	0	1391	1625	1267	64	71	111	81	76	0	0.187	0.179	0.187	0.215	2.624	0.175	0.847	120	576	1575	1841	-2.42	248	1327	280	1561	0
2	5	14	iYGL182C	iYGL182C	7870	16620	130	257	278	187	48	52	59	75	57	0	2008	2070	1526	64	80	128	86	82	0	0.108	0.115	0.118	0.122	2.314	0.114	0.779	120	579	2153	2236	-3.217	209	1944	230	2006	0
2	6	14	iYGL179C-1	iYGL179C-1	8060	16620	150	86	184	191	49	52	16	60	51	0	149	524	691	65	83	86	49	41	0	0.44	0.294	0.305	0.341	3.062	0.263	0.871	156	703	121	594	-1.183	37	84	135	459	0
2	7	14	iYGL163C-1	iYGL163C-1	8250	16610	130	232	383	363	50	54	31	79	69	0	1226	2348	2572	66	84	85	86	81	0	0.157	0.146	0.145	0.178	2.493	0.136	0.908	120	602	1342	2615	-2.672	182	1160	333	2282	0
2	8	14	iYGL159W	iYGL159W	8480	16620	120	210	501	588	50	53	17	90	80	0	545	1037	1259	66	89	139	68	60	0	0.334	0.464	0.469	0.484	2.782	0.443	0.888	120	558	639	1422	-1.582	160	479	451	971	0
2	9	14	iYGL157W	iYGL157W	8650	16600	130	217	302	246	50	53	16	82	75	0	922	1698	1676	67	96	113	80	71	0	0.195	0.155	0.151	0.173	2.705	0.139	0.884	120	537	1022	1883	-2.356	167	855	252	1631	0
2	10	14	iYGL139W	iYGL139W	8860	16610	130	592	886	800	51	57	24	95	90	0	668	956	893	69	98	105	73	65	0	0.903	0.941	0.921	1.003	2.316	0.909	0.892	120	663	1140	1722	-0.147	541	599	835	887	0
2	11	14	iYGL135W	iYGL135W	9080	16610	130	253	425	383	49	55	23	88	84	0	1041	1537	1425	66	78	93	84	79	0	0.209	0.256	0.244	0.265	2.708	0.245	0.849	120	546	1179	1847	-2.257	204	975	376	1471	0
2	12	14	iYGL130W	iYGL130W	9240	16600	130	468	562	465	51	61	34	84	75	0	990	1463	1284	68	118	268	67	60	0	0.452	0.366	0.359	0.358	2.074	0.348	0.892	120	605	1339	1906	-1.145	417	922	511	1395	0
2	13	14	iYGL114W	iYGL114W	9460	16600	150	318	592	572	51	64	39	80	72	0	415	1015	1093	69	114	236	56	47	0	0.772	0.572	0.571	0.62	2.411	0.521	0.881	156	717	613	1487	-0.374	267	346	541	946	0
2	14	14	iYGL110C	iYGL110C	9660	16600	150	63	87	55	49	56	29	37	24	0	82	152	146	65	79	57	33	29	0	0.824	0.437	0.373	0.435	3.056	0.379	0.659	156	639	31	125	-0.28	14	17	38	87	0
2	15	14	iYGL105W	iYGL105W	9860	16600	150	265	586	647	50	54	25	82	74	0	391	1026	1235	64	74	52	74	67	0	0.657	0.557	0.558	0.61	2.485	0.518	0.899	156	677	542	1498	-0.605	215	327	536	962	0
2	16	14	iYGR177C	iYGR177C	10080	16600	120	1033	1384	1255	50	57	31	95	93	0	1103	1577	1490	65	76	58	83	76	0	0.947	0.882	0.91	1.036	2.329	0.849	0.892	120	560	2021	2846	-0.079	983	1038	1334	1512	0
2	17	14	itL(CAA)G3	itL(CAA)G3	10270	16590	130	1108	1312	1065	50	59	41	99	91	0	1653	2126	1778	64	79	73	90	87	0	0.666	0.612	0.65	0.639	2.016	0.584	0.866	120	614	2647	3324	-0.587	1058	1589	1262	2062	0
2	18	14	iYGR185C	iYGR185C	10480	16590	120	158	263	230	50	61	46	73	51	0	421	877	908	64	86	102	76	61	0	0.303	0.262	0.259	0.313	2.548	0.245	0.885	120	617	465	1026	-1.725	108	357	213	813	0
2	19	14	iYGR199W	iYGR199W	10690	16590	120	372	753	736	50	55	26	95	93	0	376	740	755	63	70	44	83	78	0	1.029	1.038	1.052	1.098	2.039	0.998	0.906	120	566	635	1380	0.041	322	313	703	677	0
2	20	14	iYGR203W	iYGR203W	10870	16580	130	201	260	185	50	52	14	91	82	0	819	957	743	65	85	215	75	61	0	0.2	0.235	0.237	0.235	2.111	0.196	0.743	120	614	905	1102	-2.32	151	754	210	892	0
2	21	14	iYGR207C	iYGR207C	11080	16580	120	256	384	318	51	53	14	90	85	0	355	506	418	65	89	226	53	41	0	0.707	0.755	0.739	0.736	2.199	0.486	0.503	120	576	495	774	-0.5	205	290	333	441	0
2	1	15	iYGR221C	iYGR221C	7080	16830	120	379	543	474	47	49	13	93	90	0	688	1258	1231	63	64	27	88	85	0	0.531	0.415	0.409	0.461	2.31	0.382	0.904	120	596	957	1691	-0.913	332	625	496	1195	0
2	2	15	iYGR224W	iYGR224W	7270	16830	120	357	419	299	48	51	17	92	87	0	887	1327	1169	67	76	57	85	82	0	0.377	0.294	0.288	0.321	2.194	0.257	0.866	120	577	1129	1631	-1.408	309	820	371	1260	0
2	3	15	iYGR230W	iYGR230W	7480	16830	120	392	722	670	49	54	21	98	93	0	686	1079	1051	67	75	43	85	82	0	0.554	0.665	0.641	0.765	2.57	0.633	0.887	120	615	962	1685	-0.852	343	619	673	1012	0
2	4	15	iYGR247W	iYGR247W	7680	16820	130	1101	1113	848	49	56	37	92	84	0	1129	1157	931	65	72	46	84	80	0	0.989	0.974	0.966	1.103	2.225	0.946	0.895	120	614	2116	2156	-0.016	1052	1064	1064	1092	0
2	5	15	iYGR250C-0	iYGR250C-0	7880	16820	120	556	1031	1117	48	56	37	93	84	0	1068	2173	2360	65	80	83	85	78	0	0.506	0.466	0.47	0.501	2.131	0.461	0.939	120	564	1511	3091	-0.981	508	1003	983	2108	0
2	6	15	iYGR253C-0	iYGR253C-0	8070	16820	110	278	324	238	49	51	14	86	81	0	1658	1696	1453	66	77	75	82	81	0	0.144	0.169	0.162	0.172	1.87	0.152	0.872	80	486	1821	1905	-2.797	229	1592	275	1630	0
2	7	15	iYHR186C	iYHR186C	8260	16810	130	1612	2161	1967	52	76	97	91	84	0	2215	3575	3409	69	125	196	86	78	0	0.727	0.602	0.595	0.714	2.549	0.57	0.922	120	659	3706	5615	-0.46	1560	2146	2109	3506	0
2	8	15	iYHR191C	iYHR191C	8470	16810	130	672	703	516	51	82	110	78	67	0	1757	1603	1264	69	133	208	76	68	0	0.368	0.425	0.429	0.456	2.157	0.405	0.886	120	634	2309	2186	-1.443	621	1688	652	1534	0
2	9	15	iYHR196W	iYHR196W	8680	16810	150	111	160	114	49	59	59	51	37	0	193	393	373	70	101	121	50	42	0	0.504	0.344	0.336	0.373	2.595	0.303	0.607	156	695	185	434	-0.988	62	123	111	323	0
2	10	15	iYHRCdelta16-0	iYHRCdelta16-0	8870	16810	120	2265	2582	2148	48	53	24	99	97	0	4486	6166	5618	68	77	73	92	89	0	0.502	0.416	0.425	0.507	2.081	0.38	0.885	120	548	6635	8632	-0.995	2217	4418	2534	6098	0
2	11	15	iYIL174W-1	iYIL174W-1	9080	16810	150	266	632	782	49	53	22	87	78	0	520	1683	2457	66	75	67	82	69	0	0.478	0.361	0.383	0.458	2.534	0.315	0.905	156	714	671	2200	-1.065	217	454	583	1617	0
2	12	15	iYIL170W-1	iYIL170W-1	9280	16800	130	477	924	957	49	54	25	95	88	0	1015	2439	2659	67	92	241	74	65	0	0.451	0.369	0.381	0.44	2.637	0.347	0.917	120	618	1376	3247	-1.147	428	948	875	2372	0
2	13	15	iYIL153W	iYIL153W	9470	16800	130	499	547	406	48	58	35	85	80	0	666	788	668	67	93	244	60	52	0	0.753	0.692	0.679	0.812	2.02	0.527	0.703	120	585	1050	1220	-0.409	451	599	499	721	0
2	14	15	iYIL149C	iYIL149C	9680	16800	150	136	314	348	49	56	32	66	56	0	307	1056	1401	65	76	52	76	60	0	0.36	0.267	0.278	0.322	2.656	0.241	0.89	156	664	329	1256	-1.476	87	242	265	991	0
2	15	15	iYIL145C	iYIL145C	9880	16790	130	170	237	185	49	52	18	92	76	0	1549	2406	2454	65	84	154	84	74	0	0.082	0.08	0.092	0.114	3.104	0.072	0.873	120	583	1605	2529	-3.616	121	1484	188	2341	0
2	16	15	iYIL129C	iYIL129C	10080	16790	130	236	391	334	50	51	12	93	90	0	1090	2749	3072	65	80	77	87	80	0	0.181	0.127	0.141	0.184	2.865	0.109	0.884	120	546	1211	3025	-2.462	186	1025	341	2684	0
2	17	15	iYIL125W	iYIL125W	10270	16790	120	550	755	686	50	53	22	93	90	0	675	1048	1051	64	73	56	77	71	0	0.818	0.716	0.706	0.929	2.709	0.668	0.919	120	521	1111	1689	-0.289	500	611	705	984	0
2	18	15	iYIL121W	iYIL121W	10470	16790	120	441	730	734	50	53	17	92	87	0	630	1224	1328	65	80	252	63	51	0	0.692	0.587	0.565	0.632	2.51	0.512	0.834	120	557	956	1839	-0.531	391	565	680	1159	0
2	19	15	itR(ACG)J	itR(ACG)J	10670	16790	130	1473	1659	1311	51	56	28	96	94	0	1124	1455	1232	65	73	43	85	80	0	1.343	1.157	1.166	1.297	2.014	1.115	0.935	120	621	2481	2998	0.425	1422	1059	1608	1390	0
2	20	15	iYJL098W	iYJL098W	10880	16790	120	105	154	100	50	54	26	75	52	0	336	521	452	66	79	113	69	55	0	0.204	0.229	0.224	0.241	1.771	0.19	0.765	120	571	325	559	-2.295	55	270	104	455	0
2	21	15	iYJL093C	iYJL093C	11080	16780	130	142	252	270	50	51	12	87	76	0	565	1453	1862	62	75	204	70	56	0	0.183	0.145	0.153	0.165	2.577	0.137	0.882	120	651	595	1593	-2.451	92	503	202	1391	0
2	1	16	iYJL074C	iYJL074C	7070	17030	130	354	560	524	48	50	16	96	91	0	1022	1719	1807	63	73	70	87	83	0	0.319	0.309	0.308	0.375	3.064	0.27	0.792	120	710	1265	2168	-1.648	306	959	512	1656	0
2	2	16	iYJL070C	iYJL070C	7280	17030	120	121	156	101	48	51	19	74	64	0	514	667	552	64	76	68	80	69	0	0.162	0.179	0.181	0.166	2.238	0.163	0.786	120	560	523	711	-2.624	73	450	108	603	0
2	3	16	iYJL064W	iYJL064W	7470	17030	120	213	341	308	48	49	13	90	89	0	291	586	575	65	67	28	85	79	0	0.73	0.562	0.565	0.575	2.7	0.516	0.822	120	561	391	814	-0.454	165	226	293	521	0
2	4	16	iSNR60	iSNR60	7680	17030	120	311	536	458	48	51	19	93	91	0	433	980	974	64	66	26	86	84	0	0.713	0.533	0.511	0.591	2.514	0.471	0.858	120	543	632	1404	-0.489	263	369	488	916	0
2	5	16	iYJLCdelta5	iYJLCdelta5	7870	17020	130	356	479	399	49	51	15	93	89	0	585	846	732	64	71	57	84	76	0	0.589	0.55	0.545	0.548	2.597	0.527	0.885	120	564	828	1212	-0.763	307	521	430	782	0
2	6	16	iYJL043W	iYJL043W	8060	17020	110	237	288	203	50	52	16	85	81	0	668	780	619	65	76	67	81	75	0	0.31	0.333	0.337	0.356	2.816	0.304	0.858	80	506	790	953	-1.689	187	603	238	715	0
2	7	16	iYJL029C	iYJL029C	8250	17010	110	251	270	164	52	60	37	82	73	0	392	499	388	69	86	83	72	62	0	0.616	0.507	0.479	0.529	2.269	0.419	0.836	80	526	522	648	-0.699	199	323	218	430	0
2	8	16	iYJL026W	iYJL026W	8450	17010	110	503	495	334	52	63	45	90	80	0	529	562	452	68	86	75	75	68	0	0.978	0.897	0.887	0.936	2.35	0.802	0.825	80	548	912	937	-0.032	451	461	443	494	0
2	9	16	iYJL022W	iYJL022W	8660	17010	110	1529	1674	1280	50	67	90	93	90	0	2052	2099	1691	69	85	96	83	81	0	0.746	0.8	0.827	0.856	2.26	0.764	0.89	80	420	3462	3654	-0.423	1479	1983	1624	2030	-100
2	10	16	iYKL121W	iYKL121W	8790	17020	120	1735	2041	1590	49	59	82	93	87	0	2321	2764	2251	67	76	79	90	87	0	0.748	0.739	0.717	0.869	2.442	0.709	0.876	120	470	3940	4689	-0.419	1686	2254	1992	2697	-100
2	11	16	iYKL117W	iYKL117W	8990	17020	120	1161	1192	691	47	50	17	100	99	0	1658	1502	915	64	67	37	94	94	0	0.699	0.796	0.783	0.853	1.876	0.77	0.901	120	579	2708	2583	-0.517	1114	1594	1145	1438	0
2	12	16	iYKL111C	iYKL111C	9180	17010	110	534	510	307	48	51	18	95	93	0	951	790	518	65	66	24	87	83	0	0.549	0.637	0.641	0.666	1.944	0.597	0.892	80	545	1372	1187	-0.866	486	886	462	725	0
2	13	16	iYKL097W-A-0	iYKL097W-A-0	9400	17010	120	323	402	287	48	52	19	97	90	0	973	1502	1292	65	68	30	93	91	0	0.303	0.246	0.249	0.29	2.297	0.219	0.866	120	617	1183	1791	-1.723	275	908	354	1437	0
2	14	16	iYKL094W	iYKL094W	9590	17010	120	2012	1894	1128	49	53	22	100	100	0	2050	1831	1105	64	69	65	99	94	0	0.988	1.044	1.075	1.131	1.795	1.037	0.931	120	559	3949	3612	-0.017	1963	1986	1845	1767	0
2	15	16	iYKL090W	iYKL090W	9790	17000	120	192	182	87	48	49	10	92	87	0	911	931	583	63	71	145	85	79	0	0.17	0.154	0.152	0.162	1.98	0.14	0.835	120	603	992	1002	-2.558	144	848	134	868	0
2	16	16	iYKL072W	iYKL072W	10000	16990	110	167	181	103	47	49	11	93	87	0	460	527	389	63	74	156	71	56	0	0.302	0.289	0.285	0.297	1.888	0.258	0.843	80	505	517	598	-1.726	120	397	134	464	0
2	17	16	iYKL071W	iYKL071W	10180	16980	140	425	711	622	49	51	15	89	83	0	538	955	898	62	68	51	78	71	0	0.79	0.741	0.738	0.804	1.875	0.703	0.922	156	654	852	1555	-0.34	376	476	662	893	0
2	18	16	itV(AAC)K1-1	itV(AAC)K1-1	10390	16990	120	768	788	378	50	52	16	100	100	0	1986	1888	991	63	75	247	90	85	0	0.373	0.404	0.41	0.443	1.636	0.378	0.916	120	580	2641	2563	-1.421	718	1923	738	1825	0
2	19	16	iYKL056C	iYKL056C	10580	16980	110	555	597	384	51	56	34	90	86	0	663	720	489	65	71	46	83	81	0	0.843	0.834	0.844	0.822	2.157	0.799	0.9	80	533	1102	1201	-0.247	504	598	546	655	0
2	20	16	iYKL052C	iYKL052C	10790	16980	130	509	535	335	51	56	34	90	85	0	2243	2550	1891	65	77	109	90	88	0	0.21	0.195	0.2	0.215	2.066	0.177	0.887	120	653	2636	2969	-2.25	458	2178	484	2485	0
2	21	16	iYKL048C	iYKL048C	11000	16980	130	494	490	317	50	51	14	93	90	0	1766	1854	1360	64	71	100	89	85	0	0.261	0.246	0.243	0.25	2.175	0.228	0.877	120	706	2146	2230	-1.939	444	1702	440	1790	0
2	1	17	iYLR069C	iYLR069C	7000	17230	120	823	805	482	47	49	11	95	95	0	1632	1555	1087	63	66	51	89	85	0	0.495	0.508	0.497	0.628	2.348	0.455	0.853	120	580	2345	2250	-1.016	776	1569	758	1492	0
2	2	17	iYLR073C	iYLR073C	7210	17230	120	364	373	219	48	50	13	95	92	0	1098	1260	895	63	67	37	90	88	0	0.305	0.272	0.255	0.314	2.395	0.243	0.855	120	578	1351	1522	-1.712	316	1035	325	1197	0
2	3	17	iYLR078C	iYLR078C	7410	17230	130	687	893	678	48	51	44	95	92	0	1662	1719	1321	64	65	29	91	90	0	0.4	0.511	0.507	0.55	2.163	0.496	0.892	120	600	2237	2500	-1.322	639	1598	845	1655	0
2	4	17	iYLR094C	iYLR094C	7610	17230	120	553	563	346	48	52	48	92	87	0	2952	2670	1718	65	69	71	95	93	0	0.175	0.198	0.201	0.227	2.128	0.19	0.886	120	532	3392	3120	-2.515	505	2887	515	2605	0
2	5	17	iYLR098C	iYLR098C	7800	17220	140	619	536	264	48	50	15	96	96	0	1545	1275	730	64	71	71	92	89	0	0.386	0.403	0.399	0.458	2.11	0.376	0.912	156	615	2052	1699	-1.375	571	1481	488	1211	0
2	6	17	iYLR104W	iYLR104W	7990	17210	130	1105	889	480	50	53	20	95	93	0	2153	1716	936	64	85	306	80	75	0	0.505	0.508	0.521	0.555	1.936	0.499	0.936	120	570	3144	2491	-0.986	1055	2089	839	1652	0
2	7	17	iYLR117C	iYLR117C	8190	17210	140	2891	2591	1557	50	57	30	98	98	0	6263	5466	3391	66	99	292	91	87	0	0.458	0.471	0.472	0.512	1.721	0.453	0.929	156	695	9038	7941	-1.125	2841	6197	2541	5400	0
2	8	17	iYLR121C	iYLR121C	8390	17200	130	554	497	257	51	62	45	90	87	0	2627	2266	1318	66	101	125	91	88	0	0.196	0.203	0.214	0.224	1.794	0.194	0.924	120	629	3064	2646	-2.348	503	2561	446	2200	0
2	9	17	iYLR125W	iYLR125W	8600	17210	140	4772	3903	2365	50	64	73	96	94	0	3791	3070	1956	66	90	109	92	88	0	1.268	1.283	1.3	1.443	1.837	1.264	0.936	156	703	8447	6857	0.342	4722	3725	3853	3004	0
2	10	17	itD(GUC)L1	itD(GUC)L1	8790	17200	130	710	668	305	50	61	71	92	89	0	1301	1173	571	63	76	69	90	89	0	0.533	0.557	0.549	0.596	1.805	0.533	0.931	120	575	1898	1728	-0.907	660	1238	618	1110	0
2	11	17	iYLR147C	iYLR147C	9000	17220	130	1904	1680	952	49	66	59	95	93	0	2780	2390	1384	64	90	102	92	88	0	0.683	0.701	0.715	0.747	1.603	0.685	0.947	120	599	4571	3957	-0.55	1855	2716	1631	2326	0
2	12	17	iYLR151C	iYLR151C	9190	17220	130	1218	1091	568	49	73	73	91	86	0	2684	2262	1251	66	114	177	88	82	0	0.447	0.474	0.459	0.495	1.864	0.45	0.94	120	633	3787	3238	-1.163	1169	2618	1042	2196	0
2	13	17	iYLR459W	iYLR459W	9400	17220	130	1100	977	484	50	61	52	95	91	0	2569	2311	1214	64	99	159	91	90	0	0.419	0.413	0.417	0.435	1.796	0.395	0.923	120	628	3555	3174	-1.254	1050	2505	927	2247	0
2	14	17	iYLR461W-1	iYLR461W-1	9600	17210	130	10697	9401	5022	51	62	69	99	95	0	13231	11476	5900	64	84	134	95	95	0	0.809	0.819	0.818	0.86	1.646	0.819	0.933	120	616	23813	20762	-0.307	10646	13167	9350	11412	0
2	15	17	iYML132W-0	iYML132W-0	9800	17210	130	1891	1725	880	51	65	77	97	95	0	4324	3802	1773	64	92	166	97	94	0	0.432	0.448	0.448	0.439	1.447	0.45	0.952	120	611	6100	5412	-1.211	1840	4260	1674	3738	0
2	16	17	iYML117W-A	iYML117W-A	10010	17210	140	1264	1100	591	49	55	35	96	92	0	2499	1975	1142	64	78	100	91	87	0	0.499	0.55	0.542	0.614	2.197	0.526	0.923	156	704	3650	2962	-1.003	1215	2435	1051	1911	0
2	17	17	iYML113W	iYML113W	10200	17200	130	1671	1540	855	49	54	28	97	95	0	3545	3039	1645	63	74	78	93	91	0	0.466	0.501	0.511	0.552	1.707	0.497	0.941	120	594	5104	4467	-1.102	1622	3482	1491	2976	0
2	18	17	iYML109W	iYML109W	10400	17200	130	1007	845	375	50	55	26	98	97	0	980	827	357	63	73	72	90	88	0	1.044	1.041	1.049	1.066	1.462	1.037	0.938	120	647	1874	1559	0.062	957	917	795	764	0
2	19	17	iYML089C	iYML089C	10610	17200	130	326	308	148	50	55	31	89	88	0	2730	2360	1317	64	70	44	91	89	0	0.104	0.112	0.11	0.135	2.233	0.104	0.862	120	646	2942	2554	-3.272	276	2666	258	2296	0
2	20	17	iYML085C	iYML085C	10800	17190	130	286	264	124	50	52	19	91	85	0	1262	1033	532	65	73	48	88	86	0	0.197	0.221	0.22	0.226	1.698	0.213	0.902	120	611	1433	1182	-2.343	236	1197	214	968	0
2	21	17	iYML081W	iYML081W	11000	17190	130	2552	2229	1046	50	59	38	100	100	0	1837	1517	659	66	73	46	96	96	0	1.413	1.502	1.462	1.525	1.482	1.537	0.943	120	713	4273	3630	0.499	2502	1771	2179	1451	0
2	1	18	iYML068W	iYML068W	7000	17440	130	800	680	328	48	55	32	95	92	0	1639	1351	723	64	78	82	90	85	0	0.477	0.491	0.483	0.521	1.576	0.467	0.917	120	629	2327	1919	-1.067	752	1575	632	1287	0
2	2	18	iYML064C	iYML064C	7220	17440	140	994	926	512	49	57	34	95	92	0	2789	2419	1304	65	84	98	93	92	0	0.347	0.373	0.385	0.365	1.521	0.369	0.939	156	683	3669	3231	-1.527	945	2724	877	2354	0
2	3	18	iYML060W	iYML060W	7410	17430	130	1111	991	480	49	60	48	93	91	0	2036	1602	853	66	83	87	90	88	0	0.539	0.613	0.597	0.665	1.865	0.574	0.908	120	574	3032	2478	-0.891	1062	1970	942	1536	0
2	4	18	iYMR222C	iYMR222C	7610	17430	130	540	476	220	49	61	47	90	84	0	2816	2263	1227	67	97	115	89	86	0	0.179	0.194	0.194	0.221	1.867	0.177	0.868	120	614	3240	2623	-2.485	491	2749	427	2196	0
2	5	18	iYMR226C	iYMR226C	7810	17430	130	648	564	274	49	56	24	93	88	0	2765	2269	1174	66	110	195	86	82	0	0.222	0.234	0.228	0.244	1.686	0.219	0.902	120	614	3298	2718	-2.172	599	2699	515	2203	0
2	6	18	iYMR230W	iYMR230W	8010	17430	120	564	502	218	51	54	20	93	90	0	4385	3696	1901	66	123	354	87	81	0	0.119	0.124	0.124	0.142	1.753	0.113	0.884	120	587	4832	4081	-3.074	513	4319	451	3630	0
2	7	18	iYMR245W	iYMR245W	8220	17420	130	807	686	375	50	55	22	95	92	0	4365	3492	2169	67	110	310	85	76	0	0.176	0.186	0.181	0.213	2.26	0.168	0.879	120	616	5055	4061	-2.505	757	4298	636	3425	0
2	8	18	iYMRWdelta19-0	iYMRWdelta19-0	8410	17420	130	2599	2169	1135	51	64	57	95	95	0	6806	5401	3249	66	107	163	90	89	0	0.378	0.397	0.399	0.474	2.074	0.364	0.914	120	603	9288	7453	-1.403	2548	6740	2118	5335	0
2	9	18	iYMR251W-A	iYMR251W-A	8610	17420	130	552	482	224	50	63	57	85	81	0	1383	1154	603	65	99	155	83	80	0	0.381	0.397	0.398	0.397	1.682	0.37	0.902	120	586	1820	1521	-1.393	502	1318	432	1089	0
2	10	18	iYMR267W	iYMR267W	8810	17420	130	2468	2030	1059	51	67	66	91	88	0	2524	2055	1228	65	90	108	83	80	0	0.983	0.994	0.976	1.14	2.234	0.946	0.911	120	619	4876	3969	-0.025	2417	2459	1979	1990	0
2	11	18	iYMR271C	iYMR271C	9010	17410	130	580	501	254	51	75	80	83	77	0	2631	2187	1239	67	105	132	87	82	0	0.206	0.212	0.208	0.23	2.292	0.198	0.868	120	609	3093	2570	-2.277	529	2564	450	2120	0
2	12	18	iYMR273C	iYMR273C	9220	17410	130	859	750	362	51	64	50	95	91	0	3889	3184	1693	67	110	141	94	90	0	0.211	0.224	0.221	0.24	1.818	0.213	0.933	120	614	4630	3816	-2.242	808	3822	699	3117	0
2	13	18	iYMR288W	iYMR288W	9420	17410	130	436	385	190	52	59	42	85	81	0	2132	1767	1004	65	100	147	85	79	0	0.186	0.196	0.197	0.214	1.811	0.187	0.924	120	599	2451	2035	-2.428	384	2067	333	1702	0
2	14	18	iYMR292W	iYMR292W	9620	17410	130	497	417	187	52	62	70	84	82	0	593	512	264	64	91	174	78	72	0	0.841	0.815	0.783	0.77	2.066	0.758	0.87	120	583	974	813	-0.249	445	529	365	448	0
2	15	18	iYMR296C	iYMR296C	9810	17400	130	679	590	278	52	60	44	91	90	0	3222	2751	1509	66	103	204	86	83	0	0.199	0.2	0.204	0.243	2.446	0.187	0.898	120	600	3783	3223	-2.332	627	3156	538	2685	0
2	16	18	iYNL048W	iYNL048W	10020	17400	130	591	532	261	51	57	31	94	90	0	1456	1305	687	67	95	143	87	85	0	0.389	0.389	0.378	0.392	1.888	0.371	0.9	120	592	1929	1719	-1.363	540	1389	481	1238	0
2	17	18	iYNL043C	iYNL043C	10220	17400	120	1241	1105	447	51	63	42	93	92	0	2908	2455	1089	70	98	111	90	88	0	0.419	0.442	0.442	0.469	1.62	0.422	0.925	120	572	4028	3439	-1.254	1190	2838	1054	2385	0
2	18	18	iYNL040W	iYNL040W	10430	17400	130	934	825	358	52	62	35	93	92	0	867	776	341	67	91	93	89	85	0	1.102	1.09	1.06	1.087	1.784	1.073	0.882	120	597	1682	1482	0.141	882	800	773	709	0
2	19	18	iYNL027W	iYNL027W	10630	17400	140	2861	2337	1425	51	57	27	97	96	0	2539	1930	1252	65	74	46	87	83	0	1.136	1.226	1.254	1.42	2.105	1.197	0.917	156	623	5284	4151	0.184	2810	2474	2286	1865	0
2	20	18	iYNL024C	iYNL024C	10820	17390	130	2037	1791	926	51	71	64	96	94	0	2020	1726	893	66	95	113	91	90	0	1.016	1.048	1.023	1.098	1.839	1.028	0.926	120	595	3940	3400	0.023	1986	1954	1740	1660	0
2	21	18	iYNL020C	iYNL020C	11030	17390	130	1276	1210	540	52	69	61	94	93	0	1186	1062	493	65	83	88	91	89	0	1.092	1.161	1.139	1.127	1.667	1.143	0.902	120	696	2345	2155	0.127	1224	1121	1158	997	0
2	1	19	iYNL003C	iYNL003C	7030	17640	130	878	790	419	49	57	37	92	90	0	4607	3989	2258	65	95	135	90	88	0	0.183	0.189	0.188	0.214	2.274	0.181	0.908	120	631	5371	4665	-2.454	829	4542	741	3924	0
2	2	19	iYNR001C	iYNR001C	7240	17640	140	1120	923	553	50	60	41	94	91	0	3680	2949	1871	67	103	146	89	85	0	0.296	0.303	0.309	0.348	1.979	0.29	0.918	156	607	4683	3755	-1.756	1070	3613	873	2882	0
2	3	19	iYNR002C	iYNR002C	7430	17630	130	667	575	282	50	62	47	93	86	0	1669	1355	745	67	89	93	85	82	0	0.385	0.408	0.405	0.443	2.25	0.373	0.869	120	577	2219	1813	-1.377	617	1602	525	1288	0
2	4	19	iYNR018W	iYNR018W	7630	17630	130	1710	1504	799	51	66	53	95	94	0	3032	2559	1406	67	100	112	88	85	0	0.56	0.583	0.584	0.622	2.034	0.56	0.922	120	631	4624	3945	-0.838	1659	2965	1453	2492	0
2	5	19	iYNR022C	iYNR022C	7840	17630	130	474	424	221	51	65	52	90	81	0	1987	1641	1029	67	114	198	81	75	0	0.22	0.237	0.228	0.276	2.293	0.206	0.823	120	595	2343	1947	-2.182	423	1920	373	1574	0
2	6	19	iYNR027W	iYNR027W	8030	17620	130	354	334	148	50	54	19	94	88	0	1334	1135	640	68	97	179	82	77	0	0.24	0.266	0.262	0.299	1.945	0.238	0.875	120	598	1570	1351	-2.058	304	1266	284	1067	0
2	7	19	iYOR064C	iYOR064C	8250	17630	140	805	801	518	50	55	21	96	94	0	2070	1825	1291	66	81	69	88	87	0	0.377	0.427	0.423	0.484	2.142	0.404	0.914	156	628	2759	2510	-1.408	755	2004	751	1759	0
2	8	19	iYOR068C	iYOR068C	8440	17620	140	5723	4857	3098	50	71	79	95	94	0	5397	4458	2952	66	101	147	87	84	0	1.064	1.094	1.087	1.259	2.031	1.076	0.922	156	596	11004	9199	0.09	5673	5331	4807	4392	0
2	9	19	iYOR071C	iYOR071C	8640	17620	140	891	725	433	51	66	64	86	79	0	2261	1791	1229	67	92	91	82	78	0	0.383	0.391	0.386	0.45	2.21	0.36	0.907	156	597	3034	2398	-1.385	840	2194	674	1724	0
2	10	19	iYOR086C	iYOR086C	8840	17620	140	757	661	381	52	72	117	87	73	0	5023	3951	2627	67	105	167	89	85	0	0.142	0.157	0.161	0.19	2.19	0.144	0.9	156	601	5661	4493	-2.813	705	4956	609	3884	0
2	11	19	iYOR090C	iYOR090C	9030	17610	130	1047	889	451	51	59	29	96	93	0	3805	3233	1899	67	97	98	88	87	0	0.266	0.265	0.265	0.33	2.31	0.243	0.911	120	575	4734	4004	-1.908	996	3738	838	3166	0
2	12	19	iYOR094W	iYOR094W	9230	17610	130	707	605	290	53	63	34	92	89	0	2414	2018	1073	67	106	116	88	84	0	0.279	0.283	0.278	0.323	1.918	0.263	0.901	120	563	3001	2503	-1.843	654	2347	552	1951	0
2	13	19	iYOR112W	iYOR112W	9410	17610	130	1437	1217	656	54	77	80	90	86	0	3410	2726	1655	69	141	227	88	83	0	0.414	0.438	0.43	0.489	1.807	0.411	0.925	120	572	4724	3820	-1.272	1383	3341	1163	2657	0
2	14	19	iYOR116C	iYOR116C	9620	17600	130	873	778	414	52	73	78	90	85	0	4436	3506	2051	67	140	254	85	82	0	0.188	0.211	0.213	0.25	2.555	0.198	0.901	120	630	5190	4165	-2.412	821	4369	726	3439	0
2	15	19	iYOR121C	iYOR121C	9830	17600	130	933	780	391	51	64	49	89	85	0	2076	1730	945	66	120	205	84	80	0	0.439	0.438	0.426	0.436	1.634	0.415	0.917	120	615	2892	2393	-1.188	882	2010	729	1664	0
2	16	19	iYOR138C	iYOR138C	10020	17600	130	626	548	268	51	63	40	90	85	0	2270	1839	971	68	104	109	88	85	0	0.261	0.281	0.281	0.302	2.046	0.265	0.91	120	581	2777	2268	-1.937	575	2202	497	1771	0
2	17	19	itG(CCC)O	itG(CCC)O	10220	17600	130	131	135	57	51	59	31	79	62	0	333	308	151	71	93	96	78	66	0	0.305	0.354	0.335	0.342	1.791	0.31	0.697	120	601	342	321	-1.711	80	262	84	237	0
2	18	19	iYOR146W	iYOR146W	10430	17590	130	275	254	115	51	56	21	92	85	0	3074	2376	1421	71	86	66	87	82	0	0.075	0.088	0.086	0.121	2.71	0.079	0.836	120	612	3227	2508	-3.745	224	3003	203	2305	0
2	19	19	iYPL228W	iYPL228W	10630	17590	130	827	724	369	53	62	59	90	85	0	1069	909	492	70	99	180	82	77	0	0.775	0.8	0.792	0.812	1.626	0.779	0.914	120	576	1773	1510	-0.368	774	999	671	839	0
2	20	19	iYPL224C	iYPL224C	10830	17590	130	1796	1504	765	53	68	51	99	95	0	6689	5491	3059	71	126	222	91	88	0	0.263	0.268	0.281	0.32	1.69	0.249	0.922	120	612	8361	6871	-1.925	1743	6618	1451	5420	0
2	21	19	iYPL220W	iYPL220W	11050	17590	140	1171	1042	679	52	67	76	89	83	0	3544	2876	2022	66	113	206	85	81	0	0.322	0.352	0.352	0.394	2.128	0.336	0.908	156	799	4597	3800	-1.636	1119	3478	990	2810	0
2	1	20	iYPL203W	iYPL203W	7040	17840	140	5862	5157	2952	49	64	86	94	94	0	4047	3424	2091	65	86	118	89	85	0	1.46	1.521	1.471	1.776	2.317	1.5	0.919	156	844	9795	8467	0.546	5813	3982	5108	3359	0
2	2	20	iYPL199C	iYPL199C	7240	17840	140	877	801	423	49	68	93	92	87	0	3445	2800	1697	66	96	127	90	86	0	0.245	0.275	0.268	0.338	2.345	0.25	0.862	156	719	4207	3486	-2.029	828	3379	752	2734	0
2	3	20	iYPL195W	iYPL195W	7440	17840	140	958	805	447	49	54	23	97	92	0	3516	2682	1754	65	85	87	87	81	0	0.263	0.289	0.287	0.378	2.313	0.265	0.913	156	770	4360	3373	-1.925	909	3451	756	2617	0
2	4	20	itE(UUC)P	itE(UUC)P	7640	17830	130	628	558	291	49	57	36	91	89	0	1005	841	467	66	87	92	85	79	0	0.617	0.657	0.647	0.719	1.924	0.628	0.883	120	659	1518	1284	-0.698	579	939	509	775	0
2	5	20	iYPL177C-0	iYPL177C-0	7840	17830	140	978	894	543	50	57	32	93	90	0	4181	3419	2309	67	94	259	82	78	0	0.226	0.252	0.249	0.309	2.457	0.236	0.925	156	781	5042	4196	-2.148	928	4114	844	3352	0
2	6	20	iYPL174C	iYPL174C	8050	17830	140	1523	1250	793	50	53	20	97	94	0	3996	3220	2146	65	91	263	82	75	0	0.375	0.38	0.381	0.454	2.214	0.366	0.933	156	751	5404	4355	-1.416	1473	3931	1200	3155	0
2	7	20	iYPL157W	iYPL157W	8240	17830	150	803	681	401	49	53	22	93	87	0	2544	2011	1320	64	79	77	83	82	0	0.304	0.325	0.315	0.368	2.102	0.305	0.93	156	800	3234	2579	-1.718	754	2480	632	1947	0
2	8	20	iYPL153C	iYPL153C	8440	17820	130	467	406	203	50	57	38	87	83	0	2987	2628	1588	66	90	106	86	83	0	0.143	0.139	0.139	0.163	2.129	0.125	0.873	120	652	3338	2918	-2.808	417	2921	356	2562	0
2	9	20	iYPL149W	iYPL149W	8650	17820	140	343	332	172	51	73	140	69	50	0	1370	1167	713	67	96	155	84	75	0	0.224	0.255	0.26	0.29	2.362	0.265	0.603	156	779	1595	1381	-2.158	292	1303	281	1100	0
2	10	20	itG(GCC)P2	itG(GCC)P2	8860	17810	130	1975	1539	942	53	89	164	86	80	0	2759	2306	1499	70	121	198	85	77	0	0.715	0.665	0.682	0.792	1.853	0.646	0.911	120	620	4611	3722	-0.484	1922	2689	1486	2236	0
2	11	20	iYPR163C	iYPR163C	9050	17820	140	964	869	444	53	71	67	96	91	0	2890	2478	1453	68	113	169	94	87	0	0.323	0.339	0.328	0.393	1.897	0.313	0.915	156	739	3733	3226	-1.631	911	2822	816	2410	0
2	12	20	iYPR167C	iYPR167C	9240	17810	140	1562	1314	678	52	67	53	100	96	0	3913	3052	1888	66	117	189	89	83	0	0.393	0.423	0.414	0.534	2.153	0.382	0.9	156	715	5357	4248	-1.349	1510	3847	1262	2986	0
2	13	20	iYPR183W	iYPR183W	9440	17810	140	1560	1259	728	52	74	70	92	87	0	6591	4834	3093	67	140	230	85	80	0	0.231	0.253	0.26	0.318	2.317	0.235	0.909	156	773	8032	5974	-2.113	1508	6524	1207	4767	0
2	14	20	iYPR187W	iYPR187W	9640	17800	130	596	528	259	52	62	47	92	86	0	1519	1249	645	65	112	180	86	77	0	0.374	0.402	0.41	0.443	1.734	0.378	0.902	120	678	1998	1660	-1.418	544	1454	476	1184	0
2	15	20	iYPR191W	iYPR191W	9840	17800	130	1428	1182	612	51	62	41	92	89	0	5462	4187	2236	65	117	190	90	85	0	0.255	0.274	0.268	0.275	1.64	0.266	0.934	120	693	6774	5253	-1.971	1377	5397	1131	4122	0
2	16	20	YALCdelta2	YALCdelta2	10050	17800	140	1763	1439	863	52	64	42	90	88	0	3002	2430	1592	68	119	187	83	79	0	0.583	0.587	0.579	0.645	2.26	0.555	0.904	156	756	4645	3749	-0.778	1711	2934	1387	2362	0
2	17	20	YBLWTy2-1B	YBLWTy2-1B	10240	17800	140	8192	7043	4612	52	81	125	99	96	0	15435	11916	7959	67	135	294	96	89	0	0.53	0.59	0.597	0.692	2.121	0.574	0.938	156	753	23508	18840	-0.917	8140	15368	6991	11849	0
2	18	20	YBLWdelta10	YBLWdelta10	10450	17800	140	18992	16495	11477	52	90	152	97	95	0	20221	15728	11157	67	150	316	89	85	0	0.94	1.05	1.072	1.197	1.881	1.044	0.943	156	763	39094	32104	-0.09	18940	20154	16443	15661	0
2	19	20	YFRWdelta10	YFRWdelta10	10630	17790	130	1789	1478	919	54	91	155	85	76	0	3248	2565	1782	70	140	311	77	71	0	0.546	0.571	0.553	0.659	2.12	0.53	0.919	120	670	4913	3919	-0.873	1735	3178	1424	2495	0
2	20	20	YGRCTy1-2A	YGRCTy1-2A	10860	17790	140	26844	21967	14535	54	94	191	100	99	0	23039	17684	11131	70	156	364	99	96	0	1.166	1.244	1.243	1.243	1.695	1.28	0.942	156	801	49759	39527	0.222	26790	22969	21913	17614	0
2	21	20	YHLComega1	YHLComega1	11040	17780	130	3933	3258	2033	52	88	184	88	84	0	4115	3259	2075	67	123	290	82	76	0	0.959	1.004	1.007	1.111	1.849	0.981	0.915	120	686	7929	6398	-0.061	3881	4048	3206	3192	0
3	1	1	PET112	YBL080C	11360	14100	120	1316	1227	535	52	53	12	97	96	0	3998	3780	1865	60	60	18	95	95	0	0.321	0.316	0.313	0.36	1.757	0.297	0.937	120	572	5202	4895	-1.639	1264	3938	1175	3720	0
3	2	1	YBL111C	YBL111C	11550	14100	130	13178	10982	5443	51	53	11	100	100	0	17856	14836	7242	59	59	20	99	99	0	0.738	0.74	0.736	0.772	1.549	0.749	0.956	120	663	30924	25708	-0.439	13127	17797	10931	14777	0
3	3	1	YBR028C	YBR028C	11760	14100	130	953	831	377	50	52	12	97	96	0	2715	2301	1134	61	61	22	96	94	0	0.34	0.349	0.345	0.374	1.842	0.328	0.941	120	655	3557	3021	-1.555	903	2654	781	2240	0
3	4	1	RHK1	YBL082C	11950	14090	120	1278	1132	549	51	53	12	99	96	0	6173	5188	2709	60	59	20	95	95	0	0.201	0.211	0.211	0.256	2.196	0.201	0.947	120	597	7340	6209	-2.317	1227	6113	1081	5128	0
3	5	1	YBL113C	YBL113C	12160	14090	140	14662	12460	6311	51	86	552	95	92	0	12321	10259	5451	58	65	147	96	93	0	1.191	1.216	1.224	1.373	1.788	1.199	0.955	156	759	26874	22610	0.253	14611	12263	12409	10201	0
3	6	1	YBR030W	YBR030W	12350	14080	130	677	602	253	51	52	11	98	97	0	2204	1935	861	59	62	77	91	89	0	0.292	0.294	0.289	0.33	1.83	0.291	0.946	120	643	2771	2427	-1.777	626	2145	551	1876	0
3	7	1	CDC27	YBL084C	12550	14080	120	3974	3427	1644	52	53	11	100	99	0	4223	3651	1868	59	62	79	92	90	0	0.942	0.94	0.955	1.046	1.817	0.911	0.94	120	622	8086	6967	-0.086	3922	4164	3375	3592	0
3	8	1	RER2	YBR002C	12760	14080	130	2170	1874	959	52	53	11	100	98	0	4442	3779	2060	59	60	36	93	90	0	0.483	0.49	0.477	0.544	1.656	0.472	0.952	120	696	6501	5542	-1.049	2118	4383	1822	3720	0
3	9	1	YBR032W	YBR032W	12960	14070	120	912	829	376	51	52	11	96	94	0	3921	3350	1666	59	57	17	93	92	0	0.223	0.236	0.23	0.253	1.406	0.232	0.957	120	621	4723	4069	-2.165	861	3862	778	3291	0
3	10	1	YBL086C	YBL086C	13160	14070	120	273	329	191	51	52	12	97	95	0	2162	2437	1487	59	59	28	95	94	0	0.106	0.117	0.114	0.125	1.931	0.114	0.89	120	626	2325	2656	-3.244	222	2103	278	2378	0
3	11	1	YBR004C	YBR004C	13360	14070	130	5644	4896	2246	51	52	11	100	100	0	3225	2796	1362	59	60	32	94	92	0	1.767	1.77	1.758	1.945	1.492	1.769	0.967	120	680	8759	7582	0.821	5593	3166	4845	2737	0
3	12	1	HMT1	YBR034C	13560	14060	120	5086	4270	2145	52	54	15	100	99	0	6725	5641	3007	59	58	22	93	93	0	0.755	0.756	0.754	0.826	1.674	0.745	0.948	120	638	11700	9800	-0.405	5034	6666	4218	5582	0
3	13	1	YCL044C	YCL044C	13760	14040	100	157	222	224	54	55	15	86	77	0	243	382	414	59	60	22	85	78	0	0.56	0.52	0.518	0.521	2.004	0.521	0.907	80	480	287	491	-0.837	103	184	168	323	0
3	14	1	YCLX03C	YCLX03C	13970	14060	120	3959	3342	1810	53	55	18	99	95	0	5019	3980	2360	60	61	23	91	90	0	0.788	0.839	0.832	1.042	2.003	0.81	0.96	120	628	8865	7209	-0.344	3906	4959	3289	3920	0
3	15	1	YCR022C	YCR022C	14160	14050	130	4170	3564	1689	53	56	23	99	97	0	7032	5855	3021	61	67	107	93	91	0	0.591	0.606	0.601	0.697	1.807	0.587	0.964	120	727	11088	9305	-0.76	4117	6971	3511	5794	0
3	16	1	YCL046W	YCL046W	14370	14040	90	491	922	1007	54	55	14	92	86	0	740	1781	2182	61	77	326	61	51	0	0.644	0.505	0.496	0.595	1.746	0.469	0.962	52	406	1116	2588	-0.636	437	679	868	1720	0
3	17	1	YCLX05C	YCLX05C	14570	14050	120	4471	3760	1620	52	91	274	93	90	0	10020	8313	3705	61	177	930	90	85	0	0.444	0.449	0.45	0.525	2.028	0.444	0.961	120	660	14378	11960	-1.172	4419	9959	3708	8252	0
3	18	1	YCR024C	YCR024C	14780	14050	130	1809	1648	846	51	86	261	89	83	0	6314	5767	3173	61	165	889	86	80	0	0.281	0.28	0.28	0.321	1.755	0.273	0.967	120	723	8011	7303	-1.831	1758	6253	1597	5706	0
3	19	1	YCL048W	YCL048W	15010	14040	150	64	262	537	52	53	12	48	35	0	77	427	1012	59	59	53	32	25	0	0.667	0.571	0.631	0.629	2.826	0.519	0.904	156	873	30	578	-0.585	12	18	210	368	-50
3	20	1	YCLX07W	YCLX07W	15170	14040	120	4441	3871	3926	53	57	42	94	93	0	6972	5534	3656	59	60	37	92	90	0	0.635	0.697	0.654	0.804	2.172	0.846	0.824	120	548	11301	9293	-0.656	4388	6913	3818	5475	0
3	21	1	YCR025C	YCR025C	15380	14040	130	524	462	219	51	55	50	85	80	0	5772	4563	2457	59	61	57	91	89	0	0.083	0.091	0.093	0.109	2.134	0.09	0.954	120	793	6186	4915	-3.594	473	5713	411	4504	0
3	1	2	APA1	YCL050C	11370	14290	120	209	309	259	52	53	12	94	89	0	326	638	651	60	59	18	90	85	0	0.59	0.445	0.452	0.461	2.137	0.402	0.915	120	558	423	835	-0.761	157	266	257	578	0
3	2	2	YCLX09W	YCLX09W	11580	14280	130	3743	3013	1562	53	60	71	94	92	0	10770	8702	4811	61	80	240	90	89	0	0.345	0.343	0.342	0.408	1.89	0.333	0.953	120	575	14399	11601	-1.537	3690	10709	2960	8641	0
3	3	2	RSG1	YCR027C	11770	14280	130	2678	2211	1084	51	59	72	95	90	0	9192	7328	3838	61	83	243	92	90	0	0.288	0.297	0.297	0.333	1.782	0.289	0.951	120	577	11758	9427	-1.797	2627	9131	2160	7267	0
3	4	2	YDL211C	YDL211C	11980	14280	120	209	310	265	52	98	644	14	0	0	707	1303	1327	60	71	177	88	82	0	0.243	0.208	0.193	0.22	2.015	0.576	0.12	120	557	804	1501	-2.043	157	647	258	1243	0
3	5	2	AAD4	YDL243C	12180	14280	120	83	86	26	51	100	660	0	0	0	164	148	65	60	70	176	5	0	0	0.308	0.398	0.341	0.333	2.503	5.159	0.464	120	530	136	123	-1.7	32	104	35	88	0
3	6	2	LUV1	YDR027C	12380	14270	130	1248	1051	479	51	52	11	100	100	0	3075	2615	1151	59	63	80	97	94	0	0.397	0.391	0.4	0.406	1.518	0.393	0.953	120	610	4213	3556	-1.333	1197	3016	1000	2556	0
3	7	2	YDL213C	YDL213C	12580	14270	120	372	582	507	52	53	12	95	94	0	979	1533	1494	61	66	95	89	87	0	0.349	0.36	0.368	0.391	1.655	0.341	0.957	120	563	1238	2002	-1.52	320	918	530	1472	0
3	8	2	HXT15	YDL245C	12790	14270	120	5266	4575	2257	52	54	16	100	100	0	9114	7604	3934	61	62	31	98	97	0	0.576	0.6	0.596	0.666	1.782	0.586	0.951	120	560	14267	12066	-0.796	5214	9053	4523	7543	0
3	9	2	YDR029W	YDR029W	12990	14270	120	442	381	159	51	53	17	96	91	0	1470	1218	564	61	62	30	94	92	0	0.278	0.285	0.289	0.322	2.012	0.275	0.937	120	546	1800	1487	-1.849	391	1409	330	1157	0
3	10	2	GDH2	YDL215C	13190	14270	130	788	728	378	51	52	13	97	95	0	2831	2567	1423	61	61	34	90	90	0	0.266	0.27	0.268	0.289	1.988	0.262	0.941	120	611	3507	3183	-1.91	737	2770	677	2506	0
3	11	2	YDL247W	YDL247W	13390	14260	120	230	274	185	51	52	11	94	90	0	929	1055	839	59	70	189	83	70	0	0.206	0.224	0.22	0.237	1.868	0.197	0.84	120	547	1049	1219	-2.281	179	870	223	996	0
3	12	2	YDR031W	YDR031W	13590	14260	130	1456	1278	743	51	53	15	96	95	0	3275	2747	1717	59	60	24	90	87	0	0.437	0.456	0.458	0.56	2.129	0.44	0.95	120	600	4621	3915	-1.195	1405	3216	1227	2688	0
3	13	2	TIM22	YDL217C	13780	14260	120	710	826	578	53	54	13	96	95	0	2652	3360	2609	62	65	40	94	90	0	0.254	0.234	0.236	0.292	2.139	0.224	0.959	120	589	3247	4071	-1.979	657	2590	773	3298	0
3	14	2	NTH1	YDR001C	13990	14250	130	1470	1790	1494	53	55	18	96	95	0	802	1314	1536	61	65	54	89	85	0	1.912	1.386	1.893	1.794	1.845	1.125	0.809	120	628	2158	2990	0.935	1417	741	1737	1253	0
3	15	2	MRH1	YDR033W	14190	14250	120	2414	2975	2401	52	55	22	97	95	0	2420	3097	2578	60	72	127	87	85	0	1.001	0.962	0.979	1.051	1.665	0.943	0.954	120	576	4722	5960	0.001	2362	2360	2923	3037	0
3	16	2	YDR346C	YDR346C	14390	14250	130	1605	1829	1078	52	57	53	96	94	0	4408	4624	2663	62	76	174	95	94	0	0.357	0.39	0.384	0.409	1.617	0.38	0.94	120	663	5899	6339	-1.485	1553	4346	1777	4562	0
3	17	2	LSM6	YDR378C	14590	14250	130	562	488	219	52	57	56	90	85	0	4501	3634	1867	62	81	175	91	88	0	0.115	0.122	0.124	0.137	1.578	0.12	0.924	120	614	4949	4008	-3.122	510	4439	436	3572	0
3	18	2	STE14	YDR410C	14800	14250	140	2591	2084	1315	54	59	44	92	88	0	7231	5534	3678	64	80	120	88	84	0	0.354	0.371	0.366	0.432	2.215	0.361	0.94	156	704	9704	7500	-1.498	2537	7167	2030	5470	0
3	19	2	YDR348C	YDR348C	14990	14240	110	664	980	742	53	59	51	92	88	0	1495	1869	1429	62	70	86	90	88	0	0.426	0.513	0.502	0.546	1.806	0.504	0.941	80	473	2044	2734	-1.23	611	1433	927	1807	0
3	20	2	YDR380W	YDR380W	15190	14240	130	4199	3517	1782	54	57	33	99	95	0	11522	8964	4735	60	65	50	96	92	0	0.362	0.389	0.389	0.45	1.912	0.379	0.94	120	635	15607	12367	-1.467	4145	11462	3463	8904	0
3	21	2	YDR412W	YDR412W	15390	14240	130	1847	1577	729	52	56	34	96	95	0	9848	7929	3933	60	71	116	94	93	0	0.183	0.194	0.193	0.22	1.763	0.186	0.942	120	694	11583	9394	-2.447	1795	9788	1525	7869	0
3	1	3	TCM10	YDR350C	11390	14490	130	2370	2036	935	51	55	24	97	97	0	8875	7057	3636	61	72	227	95	91	0	0.263	0.284	0.279	0.326	1.81	0.266	0.944	120	670	11133	8981	-1.926	2319	8814	1985	6996	0
3	2	3	RPP2B	YDR382W	11600	14490	140	1602	1407	663	53	60	69	94	91	0	4069	3281	1673	62	90	315	88	85	0	0.387	0.421	0.418	0.464	1.716	0.4	0.932	156	671	5556	4573	-1.371	1549	4007	1354	3219	0
3	3	3	ERD1	YDR414C	11800	14480	130	5555	4607	2637	53	64	74	96	91	0	9580	7976	4728	63	84	131	89	87	0	0.578	0.576	0.577	0.729	2.183	0.558	0.939	120	598	15019	12467	-0.791	5502	9517	4554	7913	0
3	4	3	YDR352W	YDR352W	12000	14480	130	5998	5262	2754	53	65	74	97	95	0	10295	8642	4607	61	82	126	92	90	0	0.581	0.607	0.598	0.721	2.096	0.594	0.93	120	632	16179	13790	-0.784	5945	10234	5209	8581	0
3	5	3	YDR384C	YDR384C	12210	14480	130	2562	2250	1195	52	57	24	98	96	0	7351	6472	3692	63	71	54	92	90	0	0.344	0.343	0.354	0.431	2.36	0.33	0.937	120	631	9798	8607	-1.538	2510	7288	2198	6409	0
3	6	3	SYF1	YDR416W	12410	14480	120	2415	2470	1294	52	55	16	99	99	0	8473	8336	4857	63	68	43	98	95	0	0.281	0.292	0.297	0.337	1.748	0.275	0.94	120	576	10773	10691	-1.831	2363	8410	2418	8273	0
3	7	3	SHC1	YER096W	12610	14470	130	4136	3403	1617	52	56	25	98	96	0	8837	7003	3528	62	69	75	92	91	0	0.465	0.483	0.484	0.552	1.796	0.469	0.948	120	617	12859	10292	-1.103	4084	8775	3351	6941	0
3	8	3	LCP5	YER127W	12800	14470	130	2886	2420	1105	54	75	129	93	89	0	10523	8458	4367	63	173	696	87	86	0	0.271	0.282	0.276	0.344	1.928	0.269	0.96	120	596	13292	10761	-1.885	2832	10460	2366	8395	0
3	9	3	BUR6	YER159C	13010	14470	140	2980	2402	1471	53	73	124	91	85	0	6149	4732	3103	63	160	652	78	75	0	0.481	0.503	0.509	0.695	2.709	0.474	0.935	156	685	9013	7018	-1.056	2927	6086	2349	4669	0
3	10	3	UBP9	YER098W	13210	14470	130	3601	2924	1595	52	57	41	98	95	0	11095	8983	5285	62	85	304	89	87	0	0.322	0.322	0.323	0.411	2.231	0.307	0.953	120	582	14582	11793	-1.636	3549	11033	2872	8921	0
3	11	3	PAK1	YER129W	13400	14460	130	6645	6425	4105	54	58	22	100	100	0	9894	8756	5868	62	79	189	87	86	0	0.67	0.733	0.744	0.985	2.443	0.712	0.95	120	615	16423	15065	-0.577	6591	9832	6371	8694	0
3	12	3	SPT2	YER161C	13600	14460	130	8198	6664	3377	54	74	120	97	95	0	16885	13250	7317	62	122	421	92	90	0	0.484	0.501	0.503	0.603	1.773	0.478	0.962	120	613	24967	19798	-1.047	8144	16823	6610	13188	0
3	13	3	UBC6	YER100W	13810	14460	140	4649	3697	2204	54	70	115	95	91	0	9207	7272	4689	64	115	402	87	83	0	0.503	0.505	0.501	0.621	1.979	0.485	0.96	156	665	13738	10851	-0.993	4595	9143	3643	7208	0
3	14	3	RPS26B	YER131W	14010	14460	130	5087	4373	1844	53	55	13	100	100	0	10552	8768	3958	64	67	48	98	96	0	0.48	0.496	0.49	0.557	1.598	0.481	0.961	120	613	15522	13024	-1.059	5034	10488	4320	8704	0
3	15	3	YER163C	YER163C	14210	14460	130	1722	1452	658	54	55	14	98	96	0	12474	10123	5110	63	75	101	95	93	0	0.134	0.139	0.138	0.158	1.684	0.131	0.955	120	615	14079	11458	-2.895	1668	12411	1398	10060	0
3	16	3	RPS8B	YER102W	14410	14450	130	3726	3004	1519	54	67	81	94	91	0	10000	7749	4164	63	113	274	90	89	0	0.37	0.384	0.385	0.444	1.754	0.371	0.967	120	616	13609	10636	-1.436	3672	9937	2950	7686	0
3	17	3	GLC7	YER133W	14610	14450	130	2145	1779	862	55	66	63	94	90	0	9021	7207	3944	64	110	241	87	86	0	0.233	0.241	0.242	0.295	2.001	0.231	0.964	120	612	11047	8867	-2.1	2090	8957	1724	7143	0
3	18	3	PAB1	YER165W	14820	14450	130	4127	3195	1906	56	64	69	93	90	0	8530	6462	4109	66	79	92	90	89	0	0.481	0.491	0.499	0.591	1.886	0.47	0.96	120	597	12535	9535	-1.056	4071	8464	3139	6396	0
3	19	3	CDC43	YGL155W	15010	14440	130	7800	6294	3217	55	66	55	99	98	0	11184	8642	4664	66	84	96	97	96	0	0.697	0.727	0.728	0.849	1.839	0.71	0.967	120	636	18863	14815	-0.522	7745	11118	6239	8576	0
3	20	3	COX4	YGL187C	15220	14440	130	606	504	251	54	66	58	85	83	0	6335	4775	2723	66	102	157	85	83	0	0.088	0.096	0.096	0.115	1.913	0.092	0.92	120	594	6821	5159	-3.505	552	6269	450	4709	0
3	21	3	YGL219C	YGL219C	15410	14440	130	2667	2272	1208	53	58	34	96	95	0	13352	10734	6118	63	91	163	91	87	0	0.197	0.208	0.21	0.257	1.994	0.2	0.964	120	658	15903	12890	-2.346	2614	13289	2219	10671	0
3	1	4	YGL157W	YGL157W	11410	14690	120	765	670	304	52	55	25	91	89	0	7829	6331	3101	62	78	238	89	86	0	0.092	0.099	0.099	0.119	2.156	0.096	0.956	120	621	8480	6887	-3.445	713	7767	618	6269	0
3	2	4	RPS26A	YGL189C	11610	14690	140	3675	2973	1736	53	55	16	98	96	0	8566	6583	4097	62	68	52	91	88	0	0.426	0.448	0.443	0.577	2.23	0.435	0.97	156	654	12126	9441	-1.231	3622	8504	2920	6521	0
3	3	4	NIF3	YGL221C	11810	14680	130	2340	1898	1015	54	72	84	90	88	0	11040	8472	4848	65	124	250	89	86	0	0.208	0.219	0.224	0.266	2.028	0.214	0.967	120	627	13261	10251	-2.263	2286	10975	1844	8407	0
3	4	4	YGL159W	YGL159W	12020	14680	130	2828	2322	1284	55	67	51	94	91	0	8317	6439	3717	64	118	231	85	84	0	0.336	0.356	0.357	0.441	2.118	0.349	0.959	120	614	11026	8642	-1.573	2773	8253	2267	6375	0
3	5	4	COX13	YGL191W	12210	14680	130	4034	3156	1765	55	70	72	91	89	0	3996	3041	1759	64	87	100	84	83	0	1.012	1.042	1.054	1.172	1.743	1.031	0.96	120	613	7911	6078	0.017	3979	3932	3101	2977	0
3	6	4	YGL223C	YGL223C	12420	14680	130	3473	2948	1371	54	67	69	97	94	0	12660	10432	5251	64	79	90	92	92	0	0.271	0.279	0.284	0.34	1.923	0.271	0.964	120	646	16015	13262	-1.881	3419	12596	2894	10368	0
3	7	4	YGL161C	YGL161C	12630	14680	130	2718	2132	1203	54	62	62	95	92	0	10529	8525	5132	63	74	79	94	90	0	0.255	0.246	0.244	0.293	1.957	0.239	0.965	120	615	13130	10540	-1.974	2664	10466	2078	8462	0
3	8	4	YGL193C	YGL193C	12810	14670	130	1925	1508	832	56	72	109	86	82	0	5251	3891	2351	68	143	540	79	75	0	0.361	0.38	0.377	0.45	1.946	0.365	0.948	120	599	7052	5275	-1.472	1869	5183	1452	3823	0
3	9	4	GOG5	YGL225W	13020	14670	130	5219	4299	1958	55	63	46	98	95	0	11772	9469	4585	65	96	229	90	89	0	0.441	0.451	0.456	0.564	2.096	0.44	0.961	120	611	16871	13648	-1.181	5164	11707	4244	9404	0
3	10	4	RNH70	YGR276C	13220	14670	130	3739	3069	1685	54	61	42	96	95	0	11494	8633	5091	62	85	290	83	82	0	0.322	0.352	0.357	0.454	2.242	0.339	0.962	120	615	15117	11586	-1.633	3685	11432	3015	8571	0
3	11	4	YHL012W	YHL012W	13420	14670	130	9177	7672	3700	55	61	28	100	100	0	9556	7574	3838	63	83	290	89	87	0	0.961	1.014	1.019	1.251	1.997	0.998	0.974	120	614	18615	15128	-0.058	9122	9493	7617	7511	0
3	12	4	YHL044W	YHL044W	13620	14660	130	2837	2400	987	55	75	116	95	92	0	9934	8240	3579	62	120	390	92	90	0	0.282	0.287	0.291	0.328	1.763	0.281	0.973	120	579	12654	10523	-1.827	2782	9872	2345	8178	0
3	13	4	YGR278W	YGR278W	13820	14660	140	4302	3431	1943	55	62	50	98	96	0	11696	8886	5498	64	87	161	89	87	0	0.365	0.383	0.39	0.487	1.926	0.369	0.974	156	659	15879	12198	-1.454	4247	11632	3376	8822	0
3	14	4	YLF2	YHL014C	14030	14660	130	10969	9006	4333	56	60	26	100	100	0	10326	8197	4166	64	69	48	94	93	0	1.063	1.1	1.109	1.324	1.78	1.085	0.973	120	597	21175	17083	0.089	10913	10262	8950	8133	0
3	15	4	YHL046C	YHL046C	14220	14650	130	16763	14012	7251	56	108	299	96	93	0	23413	18365	10170	65	160	489	90	89	0	0.716	0.763	0.757	0.895	1.631	0.745	0.974	120	598	40055	32256	-0.483	16707	23348	13956	18300	0
3	16	4	YGR280C	YGR280C	14420	14650	130	2996	2255	1286	55	121	306	85	80	0	13016	9584	5774	65	229	583	87	82	0	0.227	0.231	0.235	0.28	1.784	0.226	0.959	120	595	15892	11719	-2.139	2941	12951	2200	9519	0
3	17	4	DUR3	YHL016C	14620	14650	140	11312	9509	5039	55	72	90	99	98	0	10507	8775	5083	64	127	302	91	90	0	1.078	1.085	1.077	1.332	1.895	1.059	0.971	156	696	21700	18165	0.108	11257	10443	9454	8711	0
3	18	4	COS8	YHL048W	14830	14650	130	7134	6060	3112	54	61	67	98	98	0	11684	9457	5084	62	68	51	96	95	0	0.609	0.639	0.655	0.738	1.607	0.629	0.971	120	580	18702	15401	-0.715	7080	11622	6006	9395	0
3	19	4	BGL2	YGR282C	15010	14640	130	10126	8016	4191	54	115	247	96	94	0	6758	5099	3001	63	117	202	93	88	0	1.504	1.581	1.547	1.902	1.772	1.523	0.971	120	597	16767	12998	0.589	10072	6695	7962	5036	0
3	20	4	YHL018W	YHL018W	15230	14640	150	2612	2175	1352	54	107	230	87	81	0	7009	6353	4180	64	130	225	91	87	0	0.368	0.337	0.292	0.383	1.96	0.3	0.763	156	697	9503	8410	-1.441	2558	6945	2121	6289	0
3	21	4	YHL050C	YHL050C	15420	14640	140	19768	20506	15984	53	61	40	100	100	0	22694	21657	17237	62	95	150	93	91	0	0.871	0.947	0.959	1.214	1.908	0.938	0.981	156	749	42347	42048	-0.199	19715	22632	20453	21595	0
3	1	5	YIL086C	YIL086C	11440	14890	110	138	286	367	51	53	17	85	71	0	211	610	1051	62	63	35	73	65	0	0.584	0.429	0.453	0.571	2.511	0.302	0.626	80	550	236	783	-0.776	87	149	235	548	0
3	2	5	RHO3	YIL118W	11640	14890	120	3125	2654	1404	51	54	18	97	97	0	5860	4744	2471	62	67	49	94	94	0	0.53	0.556	0.562	0.567	1.885	0.557	0.943	120	520	8872	7285	-0.915	3074	5798	2603	4682	0
3	3	5	DNA43	YIL150C	11820	14890	120	4827	4123	1977	53	59	36	99	97	0	10555	8625	4472	65	91	155	93	90	0	0.455	0.475	0.475	0.558	1.937	0.455	0.947	120	528	15264	12630	-1.136	4774	10490	4070	8560	0
3	4	5	YIL088C	YIL088C	12020	14880	130	5268	4288	2290	54	66	51	97	95	0	13561	10775	5842	65	101	148	93	90	0	0.386	0.395	0.394	0.461	1.975	0.388	0.94	120	616	18710	14944	-1.372	5214	13496	4234	10710	0
3	5	5	YIL120W	YIL120W	12220	14880	130	7059	5674	2875	56	80	88	97	95	0	9382	7412	4199	66	113	171	93	90	0	0.752	0.765	0.746	0.951	2.418	0.724	0.939	120	627	16319	12964	-0.412	7003	9316	5618	7346	0
3	6	5	YIL152W	YIL152W	12430	14880	130	6496	5698	3032	55	75	101	97	94	0	7429	6188	3307	64	87	109	91	89	0	0.875	0.921	0.933	1.067	2.127	0.926	0.94	120	629	13806	11767	-0.193	6441	7365	5643	6124	0
3	7	5	YIL090W	YIL090W	12640	14880	130	8471	7272	4007	54	67	92	99	96	0	10286	8336	4458	63	77	127	94	91	0	0.823	0.872	0.877	0.926	1.8	0.89	0.942	120	584	18640	15491	-0.28	8417	10223	7218	8273	0
3	8	5	YIL122W	YIL122W	12820	14870	120	4159	3563	1931	54	64	34	99	97	0	9800	8092	4768	66	94	143	89	88	0	0.422	0.437	0.439	0.527	2.151	0.409	0.932	120	542	13839	11535	-1.246	4105	9734	3509	8026	0
3	9	5	IMP2'	YIL154C	13030	14870	130	1103	924	506	55	67	53	95	90	0	4236	3280	1840	64	89	103	94	90	0	0.251	0.27	0.268	0.284	1.925	0.264	0.918	120	629	5220	4085	-1.993	1048	4172	869	3216	0
3	10	5	YIL092W	YIL092W	13240	14870	130	5594	4686	2376	53	60	46	98	96	0	11718	9733	4983	61	68	50	96	94	0	0.475	0.479	0.489	0.548	2.144	0.474	0.921	120	597	17198	14305	-1.073	5541	11657	4633	9672	0
3	11	5	AYR1	YIL124W	13420	14860	130	7520	5940	3112	54	86	172	94	92	0	7767	6113	3458	64	102	211	90	88	0	0.969	0.973	0.958	1.084	1.922	0.942	0.936	120	547	15169	11935	-0.045	7466	7703	5886	6049	0
3	12	5	UBP7	YIL156W	13620	14860	140	8646	7904	5885	54	85	157	95	93	0	8304	7500	5939	64	109	212	81	78	0	1.043	1.056	1.086	1.587	3.01	1.029	0.938	156	678	16832	15286	0.06	8592	8240	7850	7436	0
3	13	5	BNA1	YJR025C	13830	14860	130	3086	2732	1557	53	60	29	97	95	0	5434	4816	2811	64	73	52	90	90	0	0.565	0.564	0.578	0.709	2.497	0.553	0.933	120	574	8403	7431	-0.824	3033	5370	2679	4752	0
3	14	5	CDC8	YJR057W	14030	14860	130	3534	2735	1538	54	61	31	97	96	0	9372	7081	4231	64	77	69	92	90	0	0.374	0.382	0.387	0.483	2.278	0.37	0.942	120	613	12788	9698	-1.419	3480	9308	2681	7017	0
3	15	5	GRR1	YJR090C	14230	14860	130	1748	1529	749	54	95	270	85	82	0	2478	2191	1174	63	134	444	82	77	0	0.701	0.693	0.685	0.752	1.761	0.666	0.927	120	597	4109	3603	-0.512	1694	2415	1475	2128	0
3	16	5	YJR027W	YJR027W	14420	14850	130	1551	1422	815	52	62	53	93	88	0	2262	2116	1332	63	102	242	83	80	0	0.682	0.667	0.649	0.742	2.227	0.627	0.904	120	615	3698	3423	-0.553	1499	2199	1370	2053	0
3	17	5	PTK2	YJR059W	14630	14850	120	1551	1736	1243	52	54	13	99	99	0	4882	5383	4050	62	63	25	93	92	0	0.311	0.316	0.32	0.388	2.501	0.303	0.937	120	554	6319	7005	-1.685	1499	4820	1684	5321	0
3	18	5	BUD4	YJR092W	14830	14850	130	474	519	292	51	53	13	100	95	0	1039	1025	633	60	62	29	93	90	0	0.432	0.485	0.47	0.524	1.616	0.463	0.924	120	597	1402	1433	-1.211	423	979	468	965	0
3	19	5	YJR029W	YJR029W	15030	14840	130	5315	4457	2324	52	90	210	94	88	0	7256	5893	3168	61	93	188	90	86	0	0.731	0.755	0.774	0.896	1.975	0.742	0.937	120	615	12458	10237	-0.451	5263	7195	4405	5832	0
3	20	5	YJR061W	YJR061W	15230	14840	130	363	397	227	52	55	23	92	87	0	1007	1038	652	61	76	139	86	80	0	0.329	0.353	0.344	0.366	1.654	0.336	0.906	120	611	1257	1322	-1.605	311	946	345	977	0
3	21	5	IME1	YJR094C	15440	14840	130	1394	1405	922	50	55	33	94	91	0	3840	3898	2595	60	68	71	87	87	0	0.356	0.353	0.353	0.4	2.184	0.349	0.956	120	693	5124	5193	-1.492	1344	3780	1355	3838	0
3	1	6	GEA1	YJR031C	11430	15090	130	1227	1167	712	51	53	12	95	92	0	3229	2950	1905	62	64	31	88	86	0	0.371	0.386	0.385	0.4	1.793	0.371	0.942	120	717	4343	4004	-1.429	1176	3167	1116	2888	0
3	2	6	RPA12	YJR063W	11630	15080	130	1189	1260	865	52	55	17	96	93	0	3899	4078	2964	65	74	58	86	85	0	0.297	0.301	0.308	0.361	2.071	0.29	0.948	120	582	4971	5221	-1.754	1137	3834	1208	4013	0
3	3	6	SFC1	YJR095W	11820	15080	130	1323	1314	773	53	58	22	93	92	0	3484	3255	2220	66	78	67	88	87	0	0.372	0.395	0.402	0.43	1.874	0.367	0.945	120	619	4688	4450	-1.428	1270	3418	1261	3189	0
3	4	6	YKR020W	YKR020W	12050	15080	130	1593	1332	777	53	62	42	90	88	0	5223	4354	2526	66	87	109	88	85	0	0.299	0.298	0.305	0.315	1.963	0.295	0.944	120	606	6697	5567	-1.744	1540	5157	1279	4288	0
3	5	6	MRS4	YKR052C	12230	15080	130	1818	1781	1186	54	64	53	92	88	0	2096	1894	1212	64	80	86	85	83	0	0.868	0.944	0.901	1.009	1.854	0.953	0.946	120	579	3796	3557	-0.204	1764	2032	1727	1830	0
3	6	6	HBS1	YKR084C	12430	15070	130	1624	1407	776	54	59	31	93	90	0	4444	3603	2088	64	74	62	87	86	0	0.358	0.382	0.378	0.436	2.094	0.368	0.931	120	581	5950	4892	-1.48	1570	4380	1353	3539	0
3	7	6	YKR022C	YKR022C	12620	15070	130	4609	4855	3363	54	64	47	99	95	0	6461	5924	4348	65	80	73	92	90	0	0.712	0.819	0.836	0.997	2.022	0.79	0.95	120	600	10951	10660	-0.49	4555	6396	4801	5859	0
3	8	6	DYN1	YKR054C	12830	15070	120	219	250	167	53	63	43	85	66	0	426	526	397	63	82	133	77	55	0	0.457	0.425	0.426	0.417	1.744	0.352	0.753	120	574	529	660	-1.129	166	363	197	463	0
3	9	6	PRP16	YKR086W	13030	15060	130	1125	1565	1244	51	55	19	100	98	0	2961	3454	2526	60	66	51	95	95	0	0.37	0.446	0.424	0.471	1.865	0.452	0.918	120	598	3975	4908	-1.434	1074	2901	1514	3394	0
3	10	6	DBP7	YKR024C	13230	15070	120	1060	1499	1348	51	53	15	99	99	0	1278	1827	1743	61	63	27	93	90	0	0.829	0.82	0.852	0.917	1.702	0.788	0.941	120	530	2226	3214	-0.27	1009	1217	1448	1766	0
3	11	6	RNC1	YKR056W	13420	15060	130	779	883	623	53	74	153	81	72	0	3582	3825	2943	64	88	178	85	81	0	0.206	0.221	0.231	0.271	2.224	0.209	0.943	120	612	4244	4591	-2.277	726	3518	830	3761	0
3	12	6	YKR088C	YKR088C	13630	15060	120	843	937	654	53	56	21	92	88	0	1911	1974	1455	64	68	37	85	85	0	0.428	0.463	0.456	0.506	1.694	0.446	0.934	120	555	2637	2794	-1.225	790	1847	884	1910	0
3	13	6	GCN3	YKR026C	13840	15060	140	2438	2160	1538	52	58	32	94	92	0	5958	5886	4532	64	78	86	90	85	0	0.405	0.362	0.361	0.45	2.139	0.346	0.956	156	658	8280	7930	-1.305	2386	5894	2108	5822	0
3	14	6	GLG1	YKR058W	14040	15060	130	1606	1562	1027	51	56	29	95	93	0	6950	6262	4509	62	79	96	88	88	0	0.226	0.244	0.239	0.32	2.423	0.233	0.948	120	564	8443	7711	-2.147	1555	6888	1511	6200	0
3	15	6	YKR090W	YKR090W	14230	15050	130	936	1004	737	51	54	17	95	94	0	2548	2692	2240	64	69	51	85	83	0	0.356	0.363	0.369	0.501	2.58	0.341	0.965	120	598	3369	3581	-1.489	885	2484	953	2628	0
3	16	6	YLR231C	YLR231C	14440	15050	120	4624	3838	2191	51	58	30	99	95	0	10555	8001	4786	63	80	90	91	90	0	0.436	0.477	0.472	0.542	1.866	0.464	0.944	120	559	15065	11725	-1.198	4573	10492	3787	7938	0
3	17	6	RED1	YLR263W	14630	15050	120	1711	1905	1320	52	57	29	94	91	0	4825	5579	4302	62	79	84	91	88	0	0.348	0.336	0.335	0.407	1.961	0.313	0.939	120	545	6422	7370	-1.522	1659	4763	1853	5517	0
3	18	6	YLR294C	YLR294C	14830	15040	130	697	594	297	52	54	15	92	90	0	3716	3009	1621	63	74	64	89	87	0	0.177	0.184	0.183	0.199	1.718	0.177	0.939	120	615	4298	3488	-2.502	645	3653	542	2946	0
3	19	6	EST1	YLR233C	15030	15040	130	2411	2025	1024	51	55	18	100	100	0	8402	6593	3588	63	82	122	91	90	0	0.283	0.302	0.305	0.386	2.51	0.288	0.945	120	597	10699	8504	-1.821	2360	8339	1974	6530	0
3	20	6	YLR265C	YLR265C	15220	15040	130	3089	2662	1407	51	57	32	98	97	0	5575	4547	2682	63	83	141	90	89	0	0.551	0.582	0.572	0.692	1.937	0.553	0.943	120	612	8550	7095	-0.859	3038	5512	2611	4484	0
3	21	6	YLR296W	YLR296W	15440	15040	130	295	268	121	50	54	28	92	85	0	2238	1813	1096	62	72	76	89	82	0	0.113	0.125	0.121	0.155	2.255	0.113	0.877	120	725	2421	1969	-3.151	245	2176	218	1751	0
3	1	7	YLR235C	YLR235C	11430	15290	130	1573	1271	645	52	56	23	96	95	0	4767	3626	2075	62	80	110	90	88	0	0.323	0.342	0.339	0.4	1.684	0.319	0.93	120	693	6226	4783	-1.629	1521	4705	1219	3564	0
3	2	7	BOP2	YLR267W	11650	15290	140	1196	1027	607	53	59	26	93	91	0	8172	6514	4200	66	90	118	91	89	0	0.141	0.151	0.152	0.172	2.131	0.144	0.936	156	656	9249	7422	-2.826	1143	8106	974	6448	0
3	3	7	YHC1	YLR298C	11840	15280	130	2250	1791	1068	55	65	52	90	85	0	7864	5998	3773	66	110	206	82	80	0	0.281	0.293	0.289	0.364	2.547	0.288	0.951	120	577	9993	7668	-1.829	2195	7798	1736	5932	0
3	4	7	THI7	YLR237W	12050	15280	140	6689	5668	3463	55	67	53	96	94	0	11972	9774	6135	66	113	202	89	87	0	0.557	0.578	0.586	0.689	2.113	0.566	0.95	156	641	18540	15321	-0.844	6634	11906	5613	9708	0
3	5	7	YLR269C	YLR269C	12240	15280	130	2451	2051	1079	54	76	104	89	86	0	5048	3893	2267	63	113	242	87	85	0	0.481	0.521	0.509	0.606	1.853	0.49	0.947	120	544	7382	5827	-1.056	2397	4985	1997	3830	0
3	6	7	EXG1	YLR300W	12430	15270	130	3509	2855	1531	54	94	176	91	86	0	11510	8894	5150	65	190	522	85	82	0	0.302	0.317	0.312	0.373	1.856	0.302	0.954	120	612	14900	11630	-1.728	3455	11445	2801	8829	0
3	7	7	MVP1	YMR004W	12640	15270	130	2144	2158	1380	53	81	152	91	85	0	2295	2315	1540	64	152	473	80	75	0	0.937	0.935	0.951	1.019	1.737	0.887	0.884	120	631	4322	4356	-0.093	2091	2231	2105	2251	0
3	8	7	IMP2	YMR035W	12850	15270	130	2562	2261	1329	52	55	19	95	95	0	4193	3826	2343	62	66	66	86	84	0	0.608	0.587	0.579	0.635	1.858	0.569	0.93	120	577	6641	5973	-0.719	2510	4131	2209	3764	0
3	9	7	SOV1	YMR066W	13030	15260	130	1197	1159	686	52	55	19	98	97	0	2844	2511	1586	63	69	67	92	90	0	0.412	0.452	0.448	0.543	2.145	0.432	0.923	120	583	3926	3555	-1.28	1145	2781	1107	2448	0
3	10	7	PLB2	YMR006C	13230	15260	130	6062	7192	4347	51	56	33	100	100	0	3407	4027	2541	64	66	47	97	95	0	1.798	1.802	1.848	2	1.715	1.792	0.94	120	609	9354	11104	0.846	6011	3343	7141	3963	0
3	11	7	MSN2	YMR037C	13440	15260	130	1538	1495	900	52	56	30	95	90	0	5447	5193	3389	63	66	33	90	89	0	0.276	0.281	0.283	0.326	2.111	0.266	0.928	120	631	6870	6573	-1.857	1486	5384	1443	5130	0
3	12	7	YMR068W	YMR068W	13640	15260	130	1417	1468	903	52	54	13	97	96	0	3793	3941	2577	64	66	42	94	92	0	0.366	0.365	0.354	0.419	2.197	0.348	0.922	120	612	5094	5293	-1.45	1365	3729	1416	3877	0
3	13	7	PLB1	YMR008C	13850	15260	140	8116	6669	4378	53	58	35	98	98	0	12850	10269	7018	64	74	86	94	91	0	0.631	0.648	0.652	0.754	2.177	0.628	0.933	156	629	20849	16821	-0.665	8063	12786	6616	10205	0
3	14	7	SUB1	YMR039C	14040	15250	130	2901	2254	1337	53	65	53	97	90	0	11021	8122	5003	64	106	197	85	81	0	0.26	0.273	0.277	0.339	2.145	0.268	0.948	120	577	13805	10259	-1.944	2848	10957	2201	8058	0
3	15	7	MOT3	YMR070W	14240	15250	130	3188	2561	1558	53	65	48	95	92	0	11442	8786	5550	67	118	201	88	83	0	0.276	0.288	0.292	0.387	2.653	0.276	0.948	120	630	14510	11227	-1.859	3135	11375	2508	8719	0
3	16	7	YMR010W	YMR010W	14450	15250	130	5305	4446	2457	54	63	42	99	95	0	7421	6188	3624	66	99	126	93	90	0	0.714	0.717	0.718	0.824	2.012	0.69	0.931	120	629	12606	10514	-0.486	5251	7355	4392	6122	0
3	17	7	YMR041C	YMR041C	14650	15250	130	4688	3914	1913	53	59	36	99	96	0	9376	7838	4079	62	79	98	93	93	0	0.498	0.497	0.49	0.547	1.92	0.475	0.947	120	612	13949	11637	-1.007	4635	9314	3861	7776	0
3	18	7	ABF2	YMR072W	14860	15250	130	600	523	275	52	57	31	90	85	0	4216	3216	1889	61	77	96	88	84	0	0.132	0.149	0.151	0.175	1.955	0.144	0.918	120	611	4703	3626	-2.923	548	4155	471	3155	0
3	19	7	YNL046W	YNL046W	15040	15240	130	1282	1113	652	51	59	34	96	90	0	8469	6956	4601	62	119	267	89	87	0	0.146	0.154	0.153	0.176	1.896	0.143	0.916	120	562	9638	7956	-2.772	1231	8407	1062	6894	0
3	20	7	TPM1	YNL079C	15250	15240	140	1970	1637	989	51	62	44	93	89	0	8424	7153	4710	63	129	278	88	84	0	0.23	0.224	0.223	0.257	1.878	0.212	0.938	156	669	10280	8676	-2.123	1919	8361	1586	7090	0
3	21	7	CYB5	YNL111C	15450	15240	130	1499	1244	711	50	54	24	92	89	0	4201	3207	1989	62	83	133	85	84	0	0.35	0.38	0.38	0.415	1.895	0.359	0.933	120	678	5588	4339	-1.514	1449	4139	1194	3145	0
3	1	8	ALG11	YNL048W	11460	15490	140	5520	4768	2800	52	56	24	100	97	0	11225	9074	5606	62	79	109	93	89	0	0.49	0.523	0.529	0.65	2.372	0.505	0.933	156	732	16631	13728	-1.03	5468	11163	4716	9012	0
3	2	8	YNL081C	YNL081C	11660	15490	140	3929	3253	1602	52	56	24	98	98	0	4786	3825	1983	63	72	63	91	89	0	0.821	0.851	0.85	1.02	2.131	0.838	0.957	156	572	8600	6963	-0.285	3877	4723	3201	3762	0
3	3	8	RPC19	YNL113W	11850	15480	130	2019	1782	932	55	69	57	95	90	0	6694	5710	3192	67	120	212	92	89	0	0.296	0.306	0.304	0.336	1.558	0.291	0.942	120	576	8591	7370	-1.755	1964	6627	1727	5643	0
3	4	8	YNL050C	YNL050C	12060	15480	140	5067	4388	2635	54	67	48	96	95	0	7027	5432	3440	66	108	164	89	85	0	0.72	0.808	0.818	0.945	2.131	0.789	0.931	156	626	11974	9700	-0.474	5013	6961	4334	5366	0
3	5	8	YNL083W	YNL083W	12260	15470	130	4201	3465	2015	53	76	103	94	89	0	10263	8505	5176	63	110	190	90	87	0	0.407	0.404	0.401	0.468	1.983	0.392	0.942	120	560	14348	11854	-1.298	4148	10200	3412	8442	0
3	6	8	YNL115C	YNL115C	12450	15470	130	8402	6948	3895	55	106	241	90	88	0	10475	8946	5367	65	177	477	86	85	0	0.802	0.776	0.765	0.892	1.843	0.751	0.942	120	613	18757	15774	-0.319	8347	10410	6893	8881	0
3	7	8	COX5A	YNL052W	12670	15470	140	1135	1005	633	55	82	192	80	71	0	3959	3315	2223	65	106	264	86	79	0	0.277	0.292	0.295	0.333	2.055	0.281	0.929	156	625	4974	4200	-1.85	1080	3894	950	3250	0
3	8	8	MKT1	YNL085W	12850	15470	140	3070	2840	1917	54	57	22	98	96	0	7691	6997	5018	64	72	57	92	91	0	0.395	0.402	0.402	0.489	2.397	0.384	0.938	156	569	10643	9719	-1.338	3016	7627	2786	6933	0
3	9	8	MLS1	YNL117W	13060	15470	140	3112	2747	1907	53	56	19	99	97	0	8010	6599	4630	64	72	53	95	91	0	0.385	0.412	0.422	0.467	2.191	0.404	0.94	156	604	11005	9229	-1.377	3059	7946	2694	6535	0
3	10	8	YOL015W	YOL015W	13240	15460	130	1283	1233	762	51	58	44	92	85	0	2384	2319	1593	62	70	74	85	83	0	0.531	0.524	0.504	0.608	2.263	0.492	0.921	120	557	3554	3439	-0.914	1232	2322	1182	2257	0
3	11	8	YOL047C	YOL047C	13450	15460	130	2544	2205	1260	52	63	53	90	89	0	6231	4968	3117	63	88	120	88	85	0	0.404	0.439	0.436	0.528	2.148	0.411	0.938	120	629	8660	7058	-1.307	2492	6168	2153	4905	0
3	12	8	YOL079W	YOL079W	13650	15460	130	489	501	289	52	62	46	90	82	0	1258	1153	759	64	87	117	81	77	0	0.366	0.412	0.404	0.414	1.936	0.387	0.92	120	580	1631	1538	-1.45	437	1194	449	1089	0
3	13	8	YOL017W	YOL017W	13850	15460	140	8459	7120	4662	53	59	37	98	96	0	9772	7955	5463	64	70	48	91	88	0	0.866	0.896	0.92	1.212	2.49	0.875	0.943	156	641	18114	14958	-0.208	8406	9708	7067	7891	0
3	14	8	GSH2	YOL049W	14060	15460	130	998	1272	1110	53	64	48	91	89	0	1551	2090	1935	65	91	166	81	79	0	0.636	0.602	0.63	0.688	2.275	0.571	0.915	120	597	2431	3244	-0.653	945	1486	1219	2025	0
3	15	8	IRA2	YOL081W	14250	15450	130	184	297	263	52	57	30	90	81	0	359	626	657	65	81	108	84	65	0	0.449	0.437	0.431	0.428	1.711	0.387	0.85	120	598	426	806	-1.155	132	294	245	561	0
3	16	8	YOL019W	YOL019W	14450	15450	130	6240	5179	3102	53	63	42	99	95	0	11751	9330	5710	65	90	108	91	91	0	0.529	0.553	0.56	0.649	1.968	0.547	0.935	120	576	17873	14391	-0.917	6187	11686	5126	9265	0
3	17	8	GAL11	YOL051W	14650	15450	140	4291	4419	3436	53	66	49	96	93	0	9226	9096	7297	64	92	119	89	85	0	0.463	0.483	0.494	0.666	2.581	0.469	0.945	156	654	13400	13398	-1.112	4238	9162	4366	9032	0
3	18	8	YOL083W	YOL083W	14860	15450	130	2016	1673	1051	52	55	16	96	93	0	7645	5853	3800	62	67	33	90	87	0	0.259	0.28	0.288	0.344	2.294	0.275	0.926	120	559	9547	7412	-1.949	1964	7583	1621	5791	0
3	19	8	DIS3	YOL021C	15050	15440	140	6484	5357	3558	53	60	35	99	98	0	10311	8911	6228	65	111	247	86	82	0	0.628	0.6	0.617	0.828	2.367	0.58	0.934	156	621	16677	14150	-0.672	6431	10246	5304	8846	0
3	20	8	YOL053C-A	YOL053C-A	15240	15430	130	1085	996	442	52	62	38	96	96	0	3229	2719	1412	65	119	222	94	89	0	0.326	0.356	0.347	0.409	1.874	0.328	0.904	120	570	4197	3598	-1.615	1033	3164	944	2654	0
3	21	8	YOL085C	YOL085C	15460	15440	130	195	183	81	50	57	32	82	74	0	1588	1390	841	63	86	115	84	82	0	0.095	0.1	0.099	0.116	2.066	0.09	0.818	120	716	1670	1460	-3.395	145	1525	133	1327	0
3	1	9	KIN4	YOR233W	11430	15680	130	1506	1558	1076	51	53	20	98	89	0	1945	2113	1516	62	66	55	87	87	0	0.773	0.735	0.749	0.787	1.829	0.716	0.938	120	679	3338	3558	-0.372	1455	1883	1507	2051	0
3	2	9	RBL2	YOR265W	11650	15690	140	1426	1224	694	51	58	45	93	85	0	3244	2715	1635	64	75	75	88	86	0	0.432	0.442	0.436	0.485	1.69	0.424	0.943	156	627	4555	3824	-1.21	1375	3180	1173	2651	0
3	3	9	TIM18	YOR297C	11840	15680	130	1717	1501	765	52	61	36	96	95	0	2676	2339	1289	64	87	109	94	92	0	0.637	0.637	0.63	0.699	1.861	0.603	0.918	120	531	4277	3724	-0.65	1665	2612	1449	2275	0
3	4	9	SNR17A	YOR235W	12040	15680	140	2180	1916	1223	53	63	41	95	92	0	3068	2600	1703	65	88	111	87	84	0	0.708	0.735	0.747	0.801	2.031	0.719	0.942	156	605	5130	4398	-0.498	2127	3003	1863	2535	0
3	5	9	YOR267C	YOR267C	12250	15680	140	3963	4028	2651	52	59	35	98	97	0	9424	8879	6165	63	80	83	94	92	0	0.418	0.451	0.456	0.563	2.219	0.433	0.938	156	683	13272	12792	-1.259	3911	9361	3976	8816	0
3	6	9	BUD7	YOR299W	12440	15670	130	1444	1294	803	53	75	186	84	78	0	3583	3200	2050	64	99	251	86	83	0	0.395	0.396	0.39	0.451	2.116	0.385	0.94	120	631	4910	4377	-1.339	1391	3519	1241	3136	0
3	7	9	HES1	YOR237W	12640	15670	120	1765	1812	1089	54	58	31	98	96	0	4525	4368	2872	65	74	65	95	90	0	0.384	0.409	0.404	0.506	2.175	0.384	0.935	120	528	6171	6061	-1.382	1711	4460	1758	4303	0
3	8	9	PAC1	YOR269W	12850	15670	140	6364	6265	3928	54	57	19	99	99	0	7163	6674	4335	64	72	57	96	95	0	0.889	0.94	0.957	1.079	1.98	0.925	0.937	156	660	13409	12821	-0.17	6310	7099	6211	6610	0
3	9	9	RAX1	YOR301W	13030	15660	130	675	641	390	54	57	18	97	93	0	1994	1967	1341	64	72	46	90	86	0	0.322	0.308	0.299	0.365	2.182	0.289	0.917	120	569	2551	2490	-1.636	621	1930	587	1903	0
3	10	9	YOR239W	YOR239W	13240	15660	140	1071	1266	1056	52	57	31	92	87	0	2782	2996	2639	63	73	65	82	80	0	0.375	0.414	0.41	0.551	3.019	0.397	0.935	156	641	3738	4147	-1.416	1019	2719	1214	2933	0
3	11	9	YOR271C	YOR271C	13450	15660	130	791	749	407	51	60	42	93	89	0	3002	2804	1868	64	82	94	90	89	0	0.252	0.255	0.254	0.299	1.878	0.232	0.931	120	577	3678	3438	-1.989	740	2938	698	2740	0
3	12	9	CPA1	YOR303W	13640	15650	130	1377	1189	742	53	60	38	89	83	0	5647	4403	2889	65	86	105	84	81	0	0.237	0.262	0.261	0.31	2.05	0.254	0.951	120	595	6906	5474	-2.076	1324	5582	1136	4338	0
3	13	9	YPL222W	YPL222W	13860	15660	140	870	916	623	53	57	25	96	92	0	6418	6069	4523	63	73	68	92	91	0	0.129	0.144	0.146	0.18	2.262	0.137	0.937	156	639	7172	6869	-2.959	817	6355	863	6006	0
3	14	9	HFI1	YPL254W	14050	15650	130	8218	6822	3686	52	73	108	99	97	0	7070	5548	3205	65	90	161	93	90	0	1.166	1.235	1.235	1.374	1.754	1.203	0.944	120	613	15171	12253	0.221	8166	7005	6770	5483	0
3	15	9	YPR003C	YPR003C	14250	15650	130	11297	10876	6313	52	77	111	98	95	0	6724	5825	3564	65	92	164	91	89	0	1.689	1.879	1.849	2.309	2.029	1.864	0.949	120	592	17904	16584	0.756	11245	6659	10824	5760	0
3	16	9	MMT2	YPL224C	14460	15650	140	4546	3964	2312	53	63	44	97	95	0	8071	6991	4375	64	83	103	92	91	0	0.561	0.565	0.565	0.666	2.098	0.545	0.949	156	666	12500	10838	-0.834	4493	8007	3911	6927	0
3	17	9	CLN2	YPL256C	14650	15640	130	5058	4025	2396	53	66	52	99	93	0	9504	7328	4634	65	97	136	90	88	0	0.53	0.547	0.553	0.63	1.694	0.528	0.956	120	542	14444	11235	-0.915	5005	9439	3972	7263	0
3	18	9	HAL1	YPR005C	14850	15640	130	6201	5060	3054	54	81	108	93	91	0	8419	6477	4142	65	112	179	87	85	0	0.736	0.781	0.772	0.922	1.903	0.762	0.954	120	598	14501	11418	-0.443	6147	8354	5006	6412	0
3	19	9	YPL226W	YPL226W	15050	15640	130	5765	5843	3345	54	76	103	98	95	0	8490	8267	5136	65	100	162	93	90	0	0.678	0.706	0.713	0.862	1.844	0.679	0.957	120	594	14136	13991	-0.561	5711	8425	5789	8202	0
3	20	9	THI21	YPL258C	15260	15640	140	2889	2803	1853	52	60	37	96	94	0	7028	6134	4242	65	87	107	92	89	0	0.407	0.453	0.458	0.515	2.145	0.44	0.957	156	710	9800	8820	-1.295	2837	6963	2751	6069	0
3	21	9	SPO69	YPR007C	15470	15640	130	2658	2542	1585	49	53	25	98	97	0	8139	7136	4744	62	64	40	92	91	0	0.323	0.352	0.363	0.42	1.859	0.34	0.947	120	659	10686	9567	-1.63	2609	8077	2493	7074	0
3	1	10	CET1	YPL228W	11450	15880	130	6449	5576	3207	51	69	131	95	89	0	9596	7716	4787	63	87	161	90	88	0	0.671	0.722	0.719	0.936	2.216	0.69	0.948	120	696	15931	13178	-0.575	6398	9533	5525	7653	0
3	2	10	YPL260W	YPL260W	11650	15880	130	11375	9664	5645	53	106	217	95	92	0	8938	7079	4480	65	123	219	92	88	0	1.276	1.37	1.38	1.675	2.027	1.331	0.947	120	552	20195	16625	0.352	11322	8873	9611	7014	0
3	3	10	YPR009W	YPR009W	11860	15880	140	5463	5135	3540	52	91	168	89	86	0	3416	2861	2017	64	97	143	80	78	0	1.614	1.817	1.845	2.268	2.285	1.834	0.937	156	597	8763	7880	0.691	5411	3352	5083	2797	0
3	4	10	LTE1	YAL024C	12060	15880	140	352	616	891	52	61	60	87	79	0	287	559	853	64	77	114	71	46	0	1.345	1.139	1.179	1.265	2.166	0.866	0.62	156	662	523	1059	0.428	300	223	564	495	0
3	5	10	PEP1	YBL017C	12290	15870	80	191	201	125	51	53	15	92	88	0	242	307	286	64	65	22	82	73	0	0.787	0.617	0.719	0.645	1.913	0.466	0.753	52	330	318	393	-0.346	140	178	150	243	-100
3	6	10	ENA2	YDR039C	12490	15880	80	241	346	329	53	55	14	98	88	0	328	579	800	62	64	25	86	84	0	0.707	0.567	0.796	0.721	1.985	0.408	0.748	52	273	454	810	-0.501	188	266	293	517	-100
3	7	10	YFL019C	YFL019C	12640	15870	150	67	213	447	51	54	13	53	37	0	81	396	1010	62	66	37	31	21	0	0.842	0.485	0.514	0.561	3.011	0.427	0.903	156	795	35	496	-0.248	16	19	162	334	-100
3	8	10	YGL066W	YGL066W	12880	15870	80	365	678	794	51	53	11	100	98	0	572	1257	1679	62	60	17	98	92	0	0.616	0.525	0.594	0.686	2.214	0.476	0.933	52	330	824	1822	-0.7	314	510	627	1195	-100
3	9	10	MNT2	YGL257C	13090	15870	90	315	476	591	52	53	12	84	80	0	335	695	891	63	66	45	76	75	0	0.967	0.671	0.606	0.679	2.483	0.617	0.706	52	329	535	1056	-0.049	263	272	424	632	-100
3	10	10	YHR032W	YHR032W	13240	15860	150	60	119	254	51	54	14	40	25	0	69	185	509	64	70	47	19	13	0	1.8	0.562	0.606	0.65	3.071	0.377	0.622	156	660	14	189	0.848	9	5	68	121	-100
3	11	10	YHR036W	YHR036W	13440	15860	150	58	93	150	51	53	14	39	22	0	66	117	248	65	79	201	5	3	0	7	0.808	0.827	0.949	3.311	0.442	0.833	156	625	8	94	2.807	7	1	42	52	-100
3	12	10	YHR045W	YHR045W	13640	15860	150	61	213	446	51	53	14	42	30	0	71	334	828	65	88	233	14	11	0	1.667	0.602	0.705	0.858	3.902	0.439	0.661	156	626	16	431	0.737	10	6	162	269	-100
3	13	10	STT4	YLR305C	13840	15850	150	63	231	460	51	53	14	42	32	0	77	376	899	63	73	112	18	16	0	0.857	0.575	0.662	0.715	3.006	0.477	0.845	156	751	26	493	-0.222	12	14	180	313	-100
3	14	10	YLR422W	YLR422W	14090	15860	80	208	321	326	50	50	11	86	80	0	309	549	726	64	63	17	76	75	0	0.645	0.559	0.515	0.611	3.01	0.448	0.822	52	266	403	756	-0.633	158	245	271	485	-100
3	15	10	YML072C	YML072C	14240	15850	150	55	70	66	52	70	98	3	1	0	68	92	150	64	84	146	3	2	0	0.75	0.643	0.526	0.521	3.06	0.242	0.394	156	720	7	46	-0.415	3	4	18	28	-50
3	16	10	SNR54	SNR54	14470	15850	130	462	412	221	51	52	13	90	86	0	848	722	432	62	67	70	84	78	0	0.523	0.547	0.542	0.536	1.728	0.511	0.913	120	607	1197	1021	-0.935	411	786	361	660	0
3	17	10	YMR046W-A	YMR046W-A	14670	15840	130	6832	5474	3365	53	64	49	95	90	0	8771	6736	4307	64	90	125	84	83	0	0.779	0.813	0.801	0.976	2.109	0.798	0.938	120	600	15486	12093	-0.361	6779	8707	5421	6672	0
3	18	10	YMRWdelta16	YMRWdelta16	14860	15840	130	1372	1088	677	54	74	96	81	79	0	2206	1738	1209	65	98	151	75	72	0	0.616	0.618	0.607	0.728	1.992	0.576	0.934	120	614	3459	2707	-0.7	1318	2141	1034	1673	0
3	19	10	YNRCdelta9	YNRCdelta9	15070	15840	130	397	389	175	51	57	30	94	93	0	1127	1000	489	64	73	58	91	90	0	0.325	0.361	0.363	0.396	1.907	0.343	0.913	120	632	1409	1274	-1.619	346	1063	338	936	0
3	20	10	SNR50	SNR50	15270	15840	130	233	240	117	51	52	17	94	90	0	799	676	400	62	64	42	87	85	0	0.247	0.308	0.309	0.352	2.003	0.291	0.884	120	563	919	803	-2.018	182	737	189	614	0
3	21	10	tR(ACG)O	tR(ACG)O	15460	15830	130	207	192	82	50	52	14	92	89	0	410	383	214	62	65	31	83	82	0	0.451	0.442	0.44	0.462	1.93	0.401	0.87	120	665	505	463	-1.148	157	348	142	321	0
3	1	11	YPLCdelta1	YPLCdelta1	11470	16090	140	1287	1083	620	50	65	126	85	81	0	1963	1688	1418	63	82	149	83	80	0	0.651	0.636	0.653	0.777	2.322	0.463	0.592	156	733	3137	2658	-0.619	1237	1900	1033	1625	0
3	2	11	YPL183W-A	YPL183W-A	11670	16090	170	261	332	228	52	96	195	51	37	0	732	1016	837	67	112	196	75	59	0	0.314	0.295	0.289	0.303	1.971	0.285	0.691	208	686	874	1229	-1.67	209	665	280	949	0
3	3	11	IntYPL143W	IntYPL143W	11870	16080	140	2592	2465	1652	50	70	102	90	88	0	4125	3600	2586	64	86	144	85	81	0	0.626	0.683	0.69	0.845	2.294	0.653	0.928	156	567	6603	5951	-0.676	2542	4061	2415	3536	0
3	4	11	tC(GCA)P2	tC(GCA)P2	12070	16070	130	231	221	100	50	54	24	88	84	0	438	403	218	63	75	137	78	65	0	0.483	0.503	0.503	0.501	1.676	0.346	0.601	120	541	556	511	-1.051	181	375	171	340	0
3	5	11	tN(GUU)P	tN(GUU)P	12260	16070	130	7415	5923	3635	51	66	91	97	91	0	10903	9087	6012	62	97	223	94	88	0	0.679	0.651	0.648	0.749	1.888	0.62	0.922	120	666	18205	14897	-0.558	7364	10841	5872	9025	0
3	6	11	tI(AAU)P2	tI(AAU)P2	12480	16070	130	803	716	362	51	68	94	90	85	0	1696	1451	788	62	100	224	88	80	0	0.46	0.479	0.48	0.496	1.674	0.456	0.907	120	622	2386	2054	-1.12	752	1634	665	1389	0
3	7	11	itL(UAA)B2	itL(UAA)B2	12680	16070	130	426	398	214	51	54	18	91	91	0	1965	1633	1021	64	70	49	89	88	0	0.197	0.221	0.226	0.256	2.158	0.211	0.907	120	540	2276	1916	-2.342	375	1901	347	1569	0
3	8	11	iYBR057C	iYBR057C	12870	16070	140	6177	5394	3878	51	56	27	98	96	0	8470	7746	5964	64	71	53	88	85	0	0.729	0.696	0.713	0.994	2.484	0.671	0.943	156	692	14532	13025	-0.456	6126	8406	5343	7682	0
3	9	11	iYBR060C-1	iYBR060C-1	13080	16060	130	148	257	264	51	55	27	83	70	0	222	397	476	63	110	736	15	5	0	0.61	0.617	0.595	0.639	2.094	0.058	0.089	120	574	256	540	-0.713	97	159	206	334	0
3	10	11	iYBR077C	iYBR077C	13260	16060	130	1506	1314	836	51	55	27	93	91	0	3255	2836	1934	64	111	756	75	64	0	0.456	0.456	0.463	0.516	1.941	0.427	0.919	120	543	4646	4035	-1.133	1455	3191	1263	2772	0
3	11	11	iYBR081C	iYBR081C	13470	16060	140	655	613	375	51	55	26	92	86	0	2141	1894	1346	64	80	206	78	73	0	0.291	0.307	0.316	0.376	1.979	0.278	0.897	156	611	2681	2392	-1.782	604	2077	562	1830	0
3	12	11	iYBR083W	iYBR083W	13660	16050	130	662	638	382	52	54	15	94	92	0	3033	2910	1944	64	98	252	83	77	0	0.205	0.206	0.206	0.235	1.94	0.193	0.928	120	539	3579	3432	-2.283	610	2969	586	2846	0
3	13	11	iYBR097W	iYBR097W	13860	16050	130	1126	997	488	53	59	27	100	100	0	1402	1346	732	66	104	332	85	70	0	0.803	0.738	0.736	0.79	1.417	0.711	0.929	120	594	2409	2224	-0.316	1073	1336	944	1280	0
3	14	11	iYBR103W	iYBR103W	14070	16050	140	999	881	545	51	56	25	96	92	0	2136	1786	1193	66	85	289	76	72	0	0.458	0.483	0.473	0.59	2.155	0.463	0.945	156	679	3018	2550	-1.127	948	2070	830	1720	0
3	15	11	iYBR107C	iYBR107C	14280	16050	140	548	551	344	49	52	13	95	93	0	2136	1966	1345	63	65	33	94	91	0	0.241	0.264	0.266	0.297	2.193	0.252	0.931	156	599	2572	2405	-2.055	499	2073	502	1903	0
3	16	11	iYBR126C	iYBR126C	14480	16050	140	1366	1228	684	51	55	49	92	89	0	3144	2737	1655	62	70	146	86	85	0	0.427	0.44	0.438	0.476	1.817	0.419	0.926	156	632	4397	3852	-1.229	1315	3082	1177	2675	0
3	17	11	iYBR130C	iYBR130C	14680	16040	130	358	341	146	52	60	57	90	82	0	2090	1857	799	62	78	160	93	90	0	0.151	0.161	0.164	0.164	1.648	0.158	0.829	120	579	2334	2084	-2.728	306	2028	289	1795	0
3	18	11	iYBR135W	iYBR135W	14870	16040	130	1103	1054	484	53	58	27	99	99	0	3417	3048	1460	64	74	60	100	97	0	0.313	0.335	0.333	0.351	1.497	0.325	0.949	120	629	4403	3985	-1.675	1050	3353	1001	2984	0
3	19	11	iYDL248W-0	iYDL248W-0	15090	16040	130	1059	1076	679	51	53	19	97	95	0	1480	1400	890	62	65	30	90	90	0	0.711	0.766	0.759	0.774	1.717	0.76	0.937	120	583	2426	2363	-0.492	1008	1418	1025	1338	0
3	20	11	iYDL246C-1	iYDL246C-1	15270	16030	130	609	611	396	50	52	13	96	93	0	1315	1315	895	62	63	21	91	90	0	0.446	0.448	0.449	0.467	1.766	0.432	0.937	120	567	1812	1814	-1.164	559	1253	561	1253	0
3	21	11	iYDL243C	iYDL243C	15470	16030	130	1160	1167	724	51	53	15	95	93	0	2343	2127	1381	63	65	27	90	87	0	0.486	0.541	0.538	0.631	2.366	0.524	0.942	120	686	3389	3180	-1.04	1109	2280	1116	2064	0
3	1	12	iYDL227C-0	iYDL227C-0	11470	16280	130	1562	1368	813	49	52	15	98	95	0	3666	3006	1900	64	73	131	86	85	0	0.42	0.448	0.447	0.524	2.272	0.426	0.914	120	652	5115	4261	-1.251	1513	3602	1319	2942	0
3	2	12	iYDL225W	iYDL225W	11670	16280	130	4031	3784	2334	50	57	28	100	100	0	2464	2122	1346	67	73	33	94	93	0	1.661	1.817	1.904	2.13	2.032	1.791	0.937	120	546	6378	5789	0.732	3981	2397	3734	2055	0
3	3	12	iYDL220C	iYDL220C	11880	16280	140	671	624	362	50	56	27	95	91	0	1530	1366	863	64	72	82	89	84	0	0.424	0.441	0.444	0.495	2.069	0.417	0.914	156	638	2087	1876	-1.239	621	1466	574	1302	0
3	4	12	iYDL207W	iYDL207W	12080	16280	140	1577	1457	886	51	55	21	94	94	0	3109	2629	1672	63	71	78	89	87	0	0.501	0.548	0.542	0.624	2.288	0.531	0.922	156	642	4572	3972	-0.997	1526	3046	1406	2566	0
3	5	12	iYDL203C	iYDL203C	12270	16270	130	525	465	250	52	68	98	81	75	0	2401	1940	1228	62	103	262	79	75	0	0.202	0.22	0.222	0.286	2.852	0.201	0.892	120	540	2812	2291	-2.306	473	2339	413	1878	0
3	6	12	iYDL199C	iYDL199C	12460	16270	140	321	297	156	52	67	92	75	67	0	1170	976	573	63	102	249	76	71	0	0.243	0.268	0.261	0.268	1.963	0.225	0.769	156	606	1376	1158	-2.041	269	1107	245	913	0
3	7	12	iYDL183C-1	iYDL183C-1	12650	16270	140	2050	1872	1031	52	56	21	93	93	0	5579	4902	3045	64	72	46	91	90	0	0.362	0.376	0.374	0.435	1.97	0.354	0.937	156	598	7513	6658	-1.465	1998	5515	1820	4838	0
3	8	12	iYDL179W	iYDL179W	12850	16260	130	815	697	362	52	58	29	90	86	0	2028	1672	940	66	76	55	88	85	0	0.389	0.402	0.405	0.426	1.789	0.381	0.927	120	551	2725	2251	-1.363	763	1962	645	1606	0
3	9	12	iYDL175C	iYDL175C	13050	16260	130	1943	1685	809	52	58	28	95	95	0	2078	1775	890	65	115	728	81	66	0	0.939	0.955	0.958	1.021	1.942	0.612	0.498	120	589	3904	3343	-0.09	1891	2013	1633	1710	0
3	10	12	iYDR127W	iYDR127W	13240	16250	130	1025	851	469	53	56	26	92	88	0	1410	1149	639	64	110	712	70	45	0	0.722	0.735	0.736	0.781	1.672	0.323	0.372	120	616	2318	1883	-0.47	972	1346	798	1085	0
3	11	12	iYDR131C	iYDR131C	13460	16260	130	662	618	288	52	53	13	90	89	0	1903	1669	804	64	77	290	86	84	0	0.332	0.353	0.35	0.34	1.428	0.341	0.93	120	611	2449	2171	-1.592	610	1839	566	1605	0
3	12	12	iYDR137W	iYDR137W	13650	16250	130	414	384	179	52	53	14	89	87	0	2095	1786	955	65	78	67	87	85	0	0.178	0.193	0.199	0.21	1.778	0.183	0.915	120	589	2392	2053	-2.487	362	2030	332	1721	0
3	13	12	iYDR155C	iYDR155C	13850	16250	130	442	388	184	53	57	25	86	85	0	3441	2884	1554	68	98	312	85	81	0	0.115	0.119	0.117	0.127	1.724	0.113	0.906	120	592	3762	3151	-3.116	389	3373	335	2816	0
3	14	12	iYDR161W	iYDR161W	14050	16250	130	1662	1376	732	52	60	34	90	86	0	2911	2392	1364	66	99	319	82	80	0	0.566	0.569	0.563	0.638	1.97	0.548	0.946	120	572	4455	3650	-0.821	1610	2845	1324	2326	0
3	15	12	iYDR165W	iYDR165W	14260	16250	140	840	745	424	50	56	30	91	87	0	1424	1176	708	63	75	62	86	83	0	0.58	0.624	0.615	0.634	1.886	0.606	0.933	156	622	2151	1808	-0.785	790	1361	695	1113	0
3	16	12	iYDR177W	iYDR177W	14460	16250	130	382	366	140	51	54	50	90	89	0	3064	2686	1182	63	65	33	95	93	0	0.11	0.12	0.121	0.122	1.526	0.114	0.92	120	541	3332	2938	-3.181	331	3001	315	2623	0
3	17	12	iYDR180W	iYDR180W	14650	16240	130	1643	1385	672	52	59	53	94	90	0	1236	997	496	64	75	153	85	80	0	1.358	1.429	1.444	1.545	1.691	1.403	0.946	120	580	2763	2266	0.441	1591	1172	1333	933	0
3	18	12	iYDR184C	iYDR184C	14850	16240	130	1416	1298	677	52	57	21	92	91	0	1892	1643	894	65	74	60	89	88	0	0.747	0.79	0.765	0.812	1.49	0.762	0.946	120	588	3191	2824	-0.422	1364	1827	1246	1578	0
3	19	12	iYDR204W	iYDR204W	15060	16240	140	477	478	275	52	53	14	94	90	0	2448	2200	1442	62	70	56	89	86	0	0.178	0.199	0.201	0.229	2.085	0.188	0.915	156	640	2811	2564	-2.489	425	2386	426	2138	0
3	20	12	iYDR208W	iYDR208W	15250	16230	130	837	779	441	51	52	13	90	89	0	2055	1803	1057	62	65	31	90	87	0	0.394	0.418	0.406	0.416	1.734	0.405	0.939	120	581	2779	2469	-1.342	786	1993	728	1741	0
3	21	12	itI(UAU)D	itI(UAU)D	15460	16230	130	587	539	266	52	53	15	93	91	0	1446	1250	627	64	66	26	91	88	0	0.387	0.411	0.417	0.428	1.658	0.404	0.922	120	712	1917	1673	-1.369	535	1382	487	1186	0
3	1	13	iYDR521W	iYDR521W	11460	16480	130	1530	1262	690	49	54	23	93	90	0	3301	2594	1518	64	86	207	82	81	0	0.458	0.479	0.473	0.531	1.824	0.454	0.914	120	695	4718	3743	-1.128	1481	3237	1213	2530	0
3	2	13	iYDR525W	iYDR525W	11670	16490	140	322	329	209	51	59	30	86	78	0	1586	1959	1613	66	76	59	86	81	0	0.178	0.147	0.151	0.183	2.401	0.131	0.881	156	709	1791	2171	-2.488	271	1520	278	1893	0
3	3	13	iYDR528W	iYDR528W	11880	16490	130	961	795	420	50	52	15	94	91	0	2976	2447	1376	63	64	38	90	89	0	0.313	0.313	0.317	0.359	2.039	0.299	0.924	120	578	3824	3129	-1.677	911	2913	745	2384	0
3	4	13	iYDR541C-0	iYDR541C-0	12070	16480	130	1298	1649	1266	52	56	21	93	90	0	2387	3018	2459	65	70	33	88	87	0	0.537	0.541	0.524	0.634	2.042	0.511	0.908	120	560	3568	4550	-0.898	1246	2322	1597	2953	0
3	5	13	iYDR544C	iYDR544C	12280	16480	150	21486	19080	12319	53	61	59	100	98	0	24677	21710	14177	65	86	183	94	89	0	0.871	0.879	0.873	1.032	1.957	0.874	0.929	156	618	46045	40672	-0.2	21433	24612	19027	21645	0
3	6	13	iYEL073C-0	iYEL073C-0	12460	16470	130	474	437	258	51	58	62	80	74	0	1106	939	621	64	82	196	75	70	0	0.406	0.441	0.424	0.453	1.839	0.406	0.888	120	520	1465	1261	-1.301	423	1042	386	875	0
3	7	13	iYEL063C	iYEL063C	12670	16470	140	1575	1440	939	51	54	17	93	91	0	3382	2985	2209	64	69	36	87	86	0	0.459	0.476	0.47	0.584	2.199	0.44	0.924	156	613	4842	4310	-1.122	1524	3318	1389	2921	0
3	8	13	iYEL059W	iYEL059W	12870	16470	140	828	781	515	52	54	17	92	89	0	2234	2030	1516	63	70	40	85	83	0	0.357	0.371	0.362	0.465	2.397	0.347	0.933	156	602	2947	2696	-1.484	776	2171	729	1967	0
3	9	13	iYEL055C	iYEL055C	13070	16470	140	1599	1496	970	52	54	16	96	94	0	3310	2908	2066	63	70	67	85	83	0	0.476	0.508	0.514	0.628	2.382	0.48	0.925	156	598	4794	4289	-1.07	1547	3247	1444	2845	0
3	10	13	iYEL042W	iYEL042W	13270	16460	130	4802	3801	2244	51	61	47	92	91	0	6933	5595	3543	63	93	306	84	79	0	0.692	0.678	0.673	0.816	2.077	0.649	0.944	120	610	11621	9282	-0.532	4751	6870	3750	5532	0
3	11	13	iYEL038W	iYEL038W	13480	16460	130	544	486	267	50	59	48	85	84	0	2009	1639	1032	64	92	305	79	73	0	0.254	0.277	0.272	0.29	1.519	0.232	0.812	120	594	2439	2011	-1.977	494	1945	436	1575	0
3	12	13	itS(AGA)E	itS(AGA)E	13680	16460	140	411	353	171	51	52	12	92	89	0	2129	1807	1106	64	69	33	87	86	0	0.174	0.173	0.168	0.206	2.084	0.158	0.908	156	599	2425	2045	-2.52	360	2065	302	1743	0
3	13	13	iYFL044C	iYFL044C	13870	16450	140	1089	910	576	51	53	17	94	89	0	1837	1550	1038	64	73	57	85	82	0	0.585	0.578	0.576	0.615	1.673	0.559	0.942	156	580	2811	2345	-0.772	1038	1773	859	1486	0
3	14	13	iYFL039C	iYFL039C	14070	16450	140	1873	1517	923	51	59	34	94	91	0	4933	4011	2708	64	85	85	89	86	0	0.374	0.371	0.364	0.446	1.887	0.349	0.951	156	584	6691	5413	-1.418	1822	4869	1466	3947	0
3	15	13	iYFL035C-A	iYFL035C-A	14270	16450	140	1340	1157	619	51	57	26	94	89	0	1782	1463	836	63	76	62	86	85	0	0.75	0.79	0.781	0.872	1.915	0.765	0.95	156	611	3008	2506	-0.415	1289	1719	1106	1400	0
3	16	13	iYFL020C	iYFL020C	14480	16450	140	3693	3310	1904	51	54	22	99	98	0	3586	3012	1647	63	68	41	94	93	0	1.034	1.105	1.127	1.152	1.699	1.127	0.958	156	597	7165	6208	0.048	3642	3523	3259	2949	0
3	17	13	iYFL017C	iYFL017C	14680	16450	140	571	515	249	50	55	20	92	90	0	771	646	332	63	66	29	88	85	0	0.736	0.798	0.777	0.787	1.691	0.769	0.946	156	570	1229	1048	-0.442	521	708	465	583	0
3	18	13	iYFL013W-A	iYFL013W-A	14870	16440	140	927	793	454	51	58	39	88	85	0	1959	1593	957	64	76	72	84	83	0	0.462	0.485	0.476	0.531	1.769	0.47	0.953	156	588	2771	2271	-1.113	876	1895	742	1529	0
3	19	13	iYFR001W	iYFR001W	15070	16440	140	1214	1082	636	50	56	38	94	90	0	1497	1356	818	63	77	75	87	84	0	0.812	0.798	0.824	0.84	1.654	0.779	0.939	156	581	2598	2325	-0.301	1164	1434	1032	1293	0
3	20	13	iYFR005C	iYFR005C	15280	16440	140	2943	2527	1346	50	53	17	100	98	0	1965	1662	891	63	68	36	91	90	0	1.521	1.549	1.559	1.701	1.665	1.545	0.962	156	639	4795	4076	0.605	2893	1902	2477	1599	0
3	21	13	iYFR007W	iYFR007W	15470	16430	130	2050	1796	1133	52	71	109	85	81	0	2278	2049	1361	64	91	168	80	78	0	0.902	0.879	0.872	0.913	1.736	0.836	0.953	120	659	4212	3729	-0.148	1998	2214	1744	1985	0
3	1	14	iYFR019W	iYFR019W	11470	16680	130	410	360	197	51	57	34	84	79	0	1190	942	566	64	82	166	76	72	0	0.319	0.352	0.345	0.342	1.631	0.338	0.917	120	696	1485	1187	-1.649	359	1126	309	878	0
3	2	14	iYFR021W	iYFR021W	11680	16680	130	2511	2129	1110	50	60	61	99	95	0	2448	1940	1035	62	71	75	91	87	0	1.031	1.107	1.145	1.244	1.881	1.092	0.937	120	621	4847	3957	0.045	2461	2386	2079	1878	0
3	3	14	iYFR025C	iYFR025C	11890	16680	130	172	160	72	50	57	34	79	68	0	326	269	144	63	66	39	80	74	0	0.464	0.534	0.493	0.476	2.096	0.479	0.78	120	577	385	316	-1.108	122	263	110	206	0
3	4	14	iYGL013C	iYGL013C	12090	16680	140	4335	3725	2214	51	54	14	96	95	0	5879	4938	2969	63	67	31	89	87	0	0.737	0.754	0.745	0.805	2.238	0.745	0.93	156	615	10100	8549	-0.441	4284	5816	3674	4875	0
3	5	14	iYGL009C	iYGL009C	12280	16670	130	2610	2161	1439	52	62	66	88	85	0	8241	6175	4331	65	85	117	85	82	0	0.313	0.345	0.352	0.43	2.296	0.331	0.92	120	505	10734	8219	-1.676	2558	8176	2109	6110	0
3	6	14	iYGL006W	iYGL006W	12470	16670	140	6076	5305	3583	53	87	202	88	85	0	1915	1808	1326	67	93	123	76	75	0	3.259	3.017	2.886	3.429	2.431	2.962	0.919	156	615	7871	6993	1.705	6023	1848	5252	1741	0
3	7	14	iYGR011W	iYGR011W	12680	16670	140	2534	2178	1374	52	82	196	85	80	0	4629	3942	2674	66	79	77	85	85	0	0.544	0.549	0.556	0.629	2.211	0.522	0.897	156	603	7045	6002	-0.878	2482	4563	2126	3876	0
3	8	14	iYGR015C	iYGR015C	12890	16670	140	1400	1232	712	52	56	23	95	91	0	1845	1525	894	63	71	48	87	86	0	0.756	0.807	0.801	0.876	2.005	0.799	0.919	156	545	3130	2642	-0.403	1348	1782	1180	1462	0
3	9	14	iYGR020C	iYGR020C	13080	16660	140	1397	1205	755	51	58	33	91	87	0	2437	2063	1302	63	77	76	85	83	0	0.567	0.577	0.569	0.621	2.155	0.565	0.928	156	554	3720	3154	-0.819	1346	2374	1154	2000	0
3	10	14	iYGR034W	iYGR034W	13280	16660	140	1939	1713	1136	51	90	282	82	74	0	1970	1671	1126	64	110	280	79	70	0	0.991	1.034	1.023	1.143	2.189	1.028	0.926	156	638	3794	3269	-0.014	1888	1906	1662	1607	0
3	11	14	iYGR038W	iYGR038W	13490	16660	140	572	498	270	50	83	287	69	45	0	1404	1185	655	63	95	274	83	74	0	0.389	0.399	0.41	0.405	1.908	0.453	0.827	156	603	1863	1570	-1.361	522	1341	448	1122	0
3	12	14	iYGR039W	iYGR039W	13670	16650	130	484	406	229	51	53	15	91	87	0	1149	934	577	65	72	42	91	84	0	0.399	0.409	0.404	0.413	1.946	0.382	0.903	120	518	1517	1224	-1.324	433	1084	355	869	0
3	13	14	iYGR055W	iYGR055W	13880	16650	140	1494	1338	916	53	58	24	92	88	0	3246	2904	2175	66	82	65	84	82	0	0.453	0.453	0.447	0.494	2.103	0.426	0.919	156	583	4621	4123	-1.142	1441	3180	1285	2838	0
3	14	14	iYGR059W	iYGR059W	14080	16650	140	380	390	250	52	57	25	88	81	0	1019	932	643	65	81	71	85	79	0	0.344	0.39	0.394	0.416	1.797	0.377	0.916	156	610	1282	1205	-1.54	328	954	338	867	0
3	15	14	iYGR062C	iYGR062C	14290	16650	130	513	460	248	51	54	21	92	89	0	983	848	476	65	69	41	87	85	0	0.503	0.522	0.518	0.509	1.998	0.501	0.901	120	557	1380	1192	-0.991	462	918	409	783	0
3	16	14	iYHR001W	iYHR001W	14490	16650	140	4794	4205	2489	52	55	22	96	94	0	3486	2815	1787	63	68	40	89	87	0	1.385	1.509	1.526	1.795	2.444	1.49	0.921	156	535	8165	6905	0.47	4742	3423	4153	2752	0
3	17	14	iYHR004C	iYHR004C	14680	16640	140	887	763	508	51	55	21	91	87	0	2446	2093	1544	64	74	61	82	78	0	0.351	0.351	0.347	0.457	2.988	0.331	0.929	156	557	3218	2741	-1.511	836	2382	712	2029	0
3	18	14	iYHRCdelta4	iYHRCdelta4	14900	16650	140	2969	2580	1607	51	58	40	92	92	0	5208	4299	2825	64	80	76	88	87	0	0.567	0.597	0.596	0.695	2.325	0.58	0.916	156	581	8062	6764	-0.818	2918	5144	2529	4235	0
3	19	14	iYHR017W	iYHR017W	15090	16640	140	1418	1282	793	51	57	39	93	91	0	1501	1370	877	63	72	56	89	85	0	0.951	0.942	0.939	0.944	1.941	0.921	0.907	156	551	2805	2538	-0.073	1367	1438	1231	1307	0
3	20	14	iYHRCsigma2	iYHRCsigma2	15280	16630	130	192	176	81	51	54	18	84	78	0	751	637	383	64	67	35	83	80	0	0.205	0.218	0.213	0.219	1.797	0.201	0.86	120	537	828	698	-2.285	141	687	125	573	0
3	21	14	iYHR023W	iYHR023W	15490	16640	140	2672	2264	1294	51	67	100	90	88	0	1569	1332	801	63	84	155	81	78	0	1.74	1.744	1.786	1.894	2.037	1.727	0.929	156	757	4127	3482	0.799	2621	1506	2213	1269	0
3	1	15	iYHR039C	iYHR039C	11500	16880	140	255	232	129	50	62	98	67	51	0	1117	937	597	64	74	84	80	77	0	0.195	0.208	0.202	0.219	2.026	0.259	0.42	156	782	1258	1055	-2.361	205	1053	182	873	0
3	2	15	iYHR042W	iYHR042W	11700	16890	130	1011	920	573	52	71	117	85	78	0	1902	1580	1076	65	80	99	86	80	0	0.522	0.573	0.565	0.629	1.711	0.569	0.927	120	546	2796	2383	-0.938	959	1837	868	1515	0
3	3	15	iYHR046C	iYHR046C	11890	16880	140	2325	1965	1183	55	65	37	94	92	0	2474	2115	1320	69	82	58	89	87	0	0.944	0.934	0.92	1.008	1.882	0.919	0.939	156	606	4675	3956	-0.083	2270	2405	1910	2046	0
3	4	15	iYHR060W	iYHR060W	12080	16870	130	438	399	215	55	64	33	83	80	0	1724	1415	845	72	95	77	84	80	0	0.232	0.256	0.25	0.259	1.548	0.246	0.906	120	555	2035	1687	-2.109	383	1652	344	1343	0
3	5	15	iYHR064C	iYHR064C	12290	16870	130	414	365	195	53	59	26	88	85	0	2525	1997	1269	68	98	92	86	82	0	0.147	0.162	0.162	0.192	1.972	0.152	0.915	120	624	2818	2241	-2.767	361	2457	312	1929	0
3	6	15	iYHR068W	iYHR068W	12490	16870	130	776	663	360	51	79	196	78	70	0	1604	1380	847	66	87	91	87	81	0	0.471	0.466	0.46	0.55	2.095	0.435	0.918	120	594	2263	1926	-1.085	725	1538	612	1314	0
3	7	15	iYIL023C	iYIL023C	12700	16870	140	661	599	399	51	63	75	81	72	0	2508	2207	1619	65	75	57	85	83	0	0.25	0.256	0.258	0.282	2.291	0.244	0.922	156	584	3053	2690	-2.002	610	2443	548	2142	0
3	8	15	iYIL019W	iYIL019W	12890	16870	140	2084	1837	1150	52	56	24	94	91	0	4358	3858	2593	65	72	49	88	86	0	0.473	0.471	0.471	0.55	2.275	0.449	0.946	156	567	6325	5578	-1.079	2032	4293	1785	3793	0
3	9	15	iYIL015W	iYIL015W	13090	16860	130	665	568	332	54	156	780	25	0	0	1837	1433	918	68	173	656	69	60	0	0.345	0.377	0.374	0.393	1.929	0.364	0.933	120	567	2380	1879	-1.534	611	1769	514	1365	0
3	10	15	iYIL005W	iYIL005W	13290	16860	130	1230	971	586	52	100	348	72	66	0	1630	1254	809	66	125	367	73	64	0	0.753	0.774	0.776	0.794	1.783	0.752	0.928	120	534	2742	2107	-0.409	1178	1564	919	1188	0
3	11	15	iYIL001W	iYIL001W	13500	16860	140	1966	1679	1003	50	83	295	82	77	0	830	710	433	64	92	280	73	60	0	2.501	2.522	2.472	2.619	1.921	2.496	0.924	156	568	2682	2275	1.323	1916	766	1629	646	0
3	12	15	iYIR003W	iYIR003W	13700	16860	140	942	800	466	51	54	18	92	90	0	1072	957	604	65	69	37	85	81	0	0.885	0.84	0.82	0.869	2.036	0.803	0.937	156	550	1898	1641	-0.177	891	1007	749	892	0
3	13	15	iYIR018W-0	iYIR018W-0	13900	16850	150	5545	4441	2900	53	61	49	95	92	0	5751	4442	2997	66	80	75	88	87	0	0.966	1.003	0.994	1.166	2.138	0.992	0.957	156	573	11177	8764	-0.05	5492	5685	4388	4376	0
3	14	15	iYIR020C	iYIR020C	14100	16850	130	608	518	307	50	57	49	84	78	0	2589	1998	1314	64	74	70	80	78	0	0.221	0.242	0.242	0.277	2.091	0.228	0.922	120	519	3083	2402	-2.178	558	2525	468	1934	0
3	15	15	iYIR022W	iYIR022W	14300	16850	140	412	357	198	50	52	13	89	85	0	2239	2028	1351	65	70	37	85	85	0	0.167	0.156	0.154	0.173	2.163	0.146	0.913	156	553	2536	2270	-2.586	362	2174	307	1963	0
3	16	15	iYIR038C-0	iYIR038C-0	14490	16840	140	1141	1028	669	52	78	200	76	71	0	4416	3821	2621	65	115	330	80	76	0	0.25	0.26	0.261	0.309	2.196	0.252	0.943	156	497	5440	4732	-1.998	1089	4351	976	3756	0
3	17	15	iYIRCdelta6-2	iYIRCdelta6-2	14690	16850	140	3976	3306	2266	51	78	196	87	83	0	6919	5714	4071	66	120	324	82	78	0	0.573	0.576	0.583	0.73	2.164	0.564	0.953	156	524	10778	8903	-0.804	3925	6853	3255	5648	0
3	18	15	iYIR042C	iYIR042C	14880	16840	130	219	195	103	51	54	16	83	76	0	404	331	207	65	69	38	72	69	0	0.496	0.541	0.515	0.52	2.248	0.495	0.856	120	485	507	410	-1.013	168	339	144	266	0
3	19	15	iYJR076C	iYJR076C	15080	16840	140	1408	1198	701	51	55	17	92	90	0	3681	3155	2036	65	66	29	88	87	0	0.375	0.371	0.37	0.442	2.185	0.351	0.944	156	533	4973	4237	-1.414	1357	3616	1147	3090	0
3	20	15	iYJR083C	iYJR083C	15280	16840	140	889	832	511	52	54	15	91	90	0	2771	2527	1757	65	71	43	89	87	0	0.309	0.317	0.314	0.38	1.889	0.3	0.943	156	571	3543	3242	-1.693	837	2706	780	2462	0
3	21	15	iYJR089W	iYJR089W	15480	16840	140	5638	4910	3180	51	55	31	95	92	0	2970	2538	1731	64	68	39	87	85	0	1.923	1.964	1.942	2.228	2.036	1.937	0.954	156	735	8493	7333	0.943	5587	2906	4859	2474	0
3	1	16	iYJR102C	iYJR102C	11470	17080	130	1297	1045	598	50	57	36	92	88	0	4893	3868	2350	65	91	147	84	84	0	0.258	0.262	0.26	0.314	2.139	0.249	0.939	120	672	6075	4798	-1.953	1247	4828	995	3803	0
3	2	16	iYJR106W	iYJR106W	11690	17090	140	1021	1443	1196	53	68	97	84	78	0	1559	2235	1901	69	107	165	82	75	0	0.65	0.642	0.641	0.708	2.096	0.623	0.924	156	550	2458	3556	-0.622	968	1490	1390	2166	0
3	3	16	iYJR110W	iYJR110W	11880	17080	140	699	619	350	56	62	31	85	82	0	1528	1344	802	70	81	52	83	83	0	0.441	0.442	0.433	0.445	1.975	0.427	0.916	156	499	2101	1837	-1.181	643	1458	563	1274	0
3	4	16	iYJR128W	iYJR128W	12090	17080	140	1255	1063	609	56	64	32	88	87	0	3421	2686	1556	71	92	73	89	85	0	0.358	0.385	0.378	0.385	1.956	0.374	0.913	156	546	4549	3622	-1.482	1199	3350	1007	2615	0
3	5	16	iYJR132W	iYJR132W	12280	17080	140	3444	2855	1635	54	64	48	96	93	0	3210	2506	1552	70	91	77	91	86	0	1.08	1.15	1.147	1.331	2.083	1.119	0.918	156	566	6530	5237	0.111	3390	3140	2801	2436	0
3	6	16	iYJR136C	iYJR136C	12480	17070	130	231	214	101	52	60	48	81	73	0	1123	891	507	66	80	59	81	79	0	0.169	0.196	0.197	0.208	1.794	0.185	0.808	120	545	1236	987	-2.562	179	1057	162	825	0
3	7	16	iYJR151C-1	iYJR151C-1	12680	17070	140	1595	1321	742	51	55	22	91	89	0	6583	5240	3209	64	81	85	89	86	0	0.237	0.245	0.243	0.279	2.008	0.231	0.915	156	574	8063	6446	-2.078	1544	6519	1270	5176	0
3	8	16	iYJR153W-1	iYJR153W-1	12890	17070	140	2670	2204	1343	53	63	63	89	87	0	6247	4809	3113	67	101	361	81	79	0	0.423	0.454	0.451	0.542	2.578	0.432	0.911	156	525	8797	6893	-1.24	2617	6180	2151	4742	0
3	9	16	iYJR157W-0	iYJR157W-0	13080	17060	130	4971	3966	2254	56	471	1512	77	66	0	6563	5119	3174	71	443	1342	75	70	0	0.757	0.775	0.793	0.918	2.305	0.826	0.886	120	492	11407	8958	-0.401	4915	6492	3910	5048	-100
3	10	16	iYKR051W	iYKR051W	13260	17060	150	149	1988	2695	54	418	1430	35	30	0	137	1320	1746	68	382	1228	33	26	0	1.377	1.545	1.472	1.071	2.887	1.347	0.899	156	555	164	3186	0.461	95	69	1934	1252	-100
3	11	16	iYKR055W	iYKR055W	13400	17060	150	1510	1242	773	50	94	502	71	62	0	3124	2445	1595	63	90	330	80	75	0	0.477	0.5	0.501	0.535	1.999	0.485	0.949	156	542	4521	3574	-1.068	1460	3061	1192	2382	0
3	12	16	iYKR059W	iYKR059W	13600	17060	150	539	463	240	49	51	17	91	91	0	1481	1237	678	62	63	23	91	89	0	0.345	0.352	0.352	0.363	1.754	0.343	0.92	156	619	1909	1589	-1.534	490	1419	414	1175	0
3	13	16	itK(UUU)K	itK(UUU)K	13800	17050	150	253	242	124	50	54	40	84	78	0	1206	1002	600	63	65	53	83	80	0	0.178	0.204	0.207	0.232	2.094	0.188	0.848	156	619	1346	1131	-2.493	203	1143	192	939	0
3	14	16	iYKR076W	iYKR076W	14000	17050	150	1418	1187	648	51	56	45	91	87	0	3870	3101	1769	63	69	60	91	89	0	0.359	0.374	0.377	0.398	2.181	0.362	0.93	156	636	5174	4174	-1.478	1367	3807	1136	3038	0
3	15	16	iYKR080W	iYKR080W	14200	17050	150	619	537	273	50	52	12	97	92	0	1976	1656	996	62	65	29	91	87	0	0.297	0.306	0.307	0.383	2.703	0.279	0.897	156	620	2483	2081	-1.75	569	1914	487	1594	0
3	16	16	iYKR095W	iYKR095W	14400	17050	150	3716	3186	1637	50	52	13	99	97	0	9098	7478	4115	62	67	61	91	90	0	0.406	0.423	0.42	0.528	2.701	0.404	0.933	156	612	12702	10552	-1.301	3666	9036	3136	7416	0
3	17	16	iYKR099W	iYKR099W	14600	17040	150	3203	2674	1388	50	73	184	91	87	0	5531	4446	2557	64	104	303	89	85	0	0.577	0.599	0.595	0.655	1.962	0.57	0.929	156	593	8620	7006	-0.794	3153	5467	2624	4382	0
3	18	16	iYKR101W-2	iYKR101W-2	14800	17040	150	1682	1454	721	51	73	183	89	86	0	7694	6225	3455	65	96	294	88	85	0	0.214	0.228	0.225	0.264	2.347	0.215	0.942	156	600	9260	7563	-2.226	1631	7629	1403	6160	0
3	19	16	iYLL062C	iYLL062C	15000	17040	150	790	674	335	52	53	14	95	94	0	4027	3184	1890	65	89	314	85	81	0	0.186	0.199	0.2	0.249	2.322	0.183	0.907	156	625	4700	3741	-2.425	738	3962	622	3119	0
3	20	16	iYLL058W	iYLL058W	15200	17040	150	1390	1171	664	51	53	15	95	91	0	3257	2482	1587	65	91	315	78	75	0	0.419	0.463	0.459	0.557	2.254	0.42	0.887	156	626	4531	3537	-1.253	1339	3192	1120	2417	0
3	21	16	iYLL055W	iYLL055W	15410	17040	140	7678	6614	3541	50	53	26	98	96	0	5538	4495	2562	65	67	36	91	90	0	1.394	1.482	1.47	1.756	2.215	1.461	0.937	156	719	13101	10994	0.479	7628	5473	6564	4430	0
3	1	17	iYLRWdelta14	iYLRWdelta14	11400	17280	150	2072	1783	931	50	55	31	98	96	0	2670	2026	1225	63	77	119	87	82	0	0.776	0.883	0.876	1.13	2.214	0.825	0.917	156	801	4629	3696	-0.367	2022	2607	1733	1963	0
3	2	17	iYLR259C	iYLR259C	11620	17280	140	1387	1262	688	49	56	36	94	91	0	3393	2938	1636	65	89	141	92	89	0	0.402	0.422	0.404	0.436	1.931	0.407	0.917	156	653	4666	4086	-1.315	1338	3328	1213	2873	0
3	3	17	iYLR263W	iYLR263W	11820	17270	150	1471	1195	699	50	52	13	93	91	0	1696	1339	767	65	66	35	85	85	0	0.871	0.899	0.88	0.91	1.739	0.903	0.933	156	574	3052	2419	-0.199	1421	1631	1145	1274	0
3	4	17	iYLR281C	iYLR281C	12020	17270	150	434	386	199	52	52	13	94	89	0	712	613	322	65	68	64	84	82	0	0.59	0.609	0.607	0.642	1.897	0.596	0.897	156	589	1029	882	-0.76	382	647	334	548	0
3	5	17	iYLR286C	iYLR286C	12220	17270	140	1316	1166	623	51	59	46	93	90	0	2912	2406	1336	65	74	74	92	89	0	0.444	0.476	0.469	0.504	1.871	0.461	0.926	156	540	4112	3456	-1.17	1265	2847	1115	2341	0
3	6	17	iYLR289W	iYLR289W	12420	17270	140	711	626	321	53	62	48	92	87	0	1214	1038	571	68	77	49	90	87	0	0.574	0.591	0.57	0.615	1.956	0.567	0.925	156	611	1804	1543	-0.8	658	1146	573	970	0
3	7	17	iYLR304C	iYLR304C	12620	17260	130	775	727	334	51	55	20	96	94	0	2730	2310	1080	65	76	69	91	91	0	0.272	0.301	0.309	0.336	1.948	0.291	0.931	120	545	3389	2921	-1.88	724	2665	676	2245	0
3	8	17	iYLR308W	iYLR308W	12820	17260	140	691	648	374	51	59	58	86	83	0	1291	1065	652	66	95	340	75	64	0	0.522	0.598	0.587	0.602	1.926	0.573	0.895	156	592	1865	1596	-0.937	640	1225	597	999	0
3	9	17	iYLR312W-A	iYLR312W-A	13020	17260	140	2001	1692	965	51	136	642	77	62	0	3668	2904	1841	66	148	638	80	69	0	0.541	0.578	0.573	0.656	2.119	0.533	0.899	156	600	5552	4479	-0.885	1950	3602	1641	2838	0
3	10	17	iYLR330W	iYLR330W	13230	17260	140	1519	1266	756	51	297	1182	57	0	0	5453	4200	2655	64	258	958	79	71	0	0.272	0.294	0.301	0.333	1.963	0.305	0.708	156	568	6857	5351	-1.876	1468	5389	1215	4136	0
3	11	17	iSNR61	iSNR61	13430	17280	140	622	548	270	49	51	15	96	94	0	1249	1063	590	62	67	79	89	87	0	0.483	0.499	0.497	0.546	1.793	0.47	0.917	156	590	1760	1500	-1.051	573	1187	499	1001	0
3	12	17	iYLRWdelta20	iYLRWdelta20	13630	17280	130	568	501	248	49	51	11	95	92	0	1419	1142	652	62	64	28	90	89	0	0.382	0.419	0.419	0.468	1.859	0.392	0.908	120	553	1876	1532	-1.387	519	1357	452	1080	0
3	13	17	iYMR033W	iYMR033W	13820	17270	130	1908	1569	817	52	56	29	94	92	0	1803	1459	823	64	68	40	91	90	0	1.067	1.087	1.084	1.143	1.823	1.036	0.917	120	560	3595	2912	0.094	1856	1739	1517	1395	0
3	14	17	iYMR037C	iYMR037C	14030	17270	140	1112	1030	577	51	54	28	94	91	0	3286	2898	1793	63	66	33	94	91	0	0.329	0.345	0.338	0.404	2.255	0.326	0.925	156	616	4284	3814	-1.603	1061	3223	979	2835	0
3	15	17	iYMR041C	iYMR041C	14230	17270	140	658	602	309	50	51	12	94	94	0	1958	1576	911	61	61	29	91	91	0	0.321	0.364	0.359	0.393	1.986	0.344	0.908	156	616	2505	2067	-1.642	608	1897	552	1515	0
3	16	17	iYMR054W	iYMR054W	14430	17260	130	632	567	258	50	50	11	95	94	0	1265	1077	506	61	61	30	94	91	0	0.483	0.509	0.508	0.528	1.564	0.497	0.926	120	563	1786	1533	-1.049	582	1204	517	1016	0
3	17	17	iYMR058W	iYMR058W	14630	17260	140	993	926	538	50	52	14	95	93	0	1330	1131	696	62	62	26	91	89	0	0.744	0.819	0.805	0.878	1.93	0.761	0.863	156	615	2211	1945	-0.427	943	1268	876	1069	0
3	18	17	iYMR063W	iYMR063W	14830	17260	140	437	390	175	50	51	11	95	92	0	893	742	365	62	61	18	91	88	0	0.466	0.5	0.505	0.499	1.56	0.481	0.925	156	631	1218	1020	-1.103	387	831	340	680	0
3	19	17	iYMR078C	iYMR078C	15030	17250	130	970	813	388	51	53	13	95	92	0	2399	1960	926	62	89	328	87	83	0	0.393	0.401	0.399	0.406	1.581	0.38	0.894	120	573	3256	2660	-1.347	919	2337	762	1898	0
3	20	17	iYMR082C-0	iYMR082C-0	15230	17250	130	852	780	365	49	52	13	95	92	0	2681	2358	1127	64	84	302	88	84	0	0.307	0.319	0.321	0.348	1.758	0.299	0.897	120	590	3420	3025	-1.704	803	2617	731	2294	0
3	21	17	iYMR085W	iYMR085W	15430	17240	130	309	282	128	49	50	11	91	88	0	1131	985	537	63	63	33	85	85	0	0.243	0.253	0.252	0.259	1.553	0.237	0.91	120	676	1328	1155	-2.038	260	1068	233	922	0
3	1	18	iYMR101C	iYMR101C	11440	17500	130	1029	902	418	51	52	13	96	94	0	2125	1823	881	64	65	21	90	90	0	0.475	0.484	0.472	0.504	1.643	0.467	0.935	120	651	3039	2610	-1.075	978	2061	851	1759	0
3	2	18	iYMR105C	iYMR105C	11640	17500	130	818	790	422	49	50	12	95	93	0	2506	2350	1280	64	63	18	94	94	0	0.315	0.324	0.322	0.331	1.446	0.31	0.928	120	572	3211	3027	-1.667	769	2442	741	2286	0
3	3	18	iYMR107W	iYMR107W	11840	17490	140	578	529	264	51	52	13	96	92	0	2575	2293	1261	66	67	26	93	91	0	0.21	0.215	0.219	0.245	1.797	0.205	0.922	156	645	3036	2705	-2.251	527	2509	478	2227	0
3	4	18	iYNL272C	iYNL272C	12040	17490	140	1128	961	467	51	52	13	95	94	0	3248	2671	1412	65	74	108	89	87	0	0.338	0.349	0.354	0.389	1.819	0.334	0.932	156	611	4260	3516	-1.563	1077	3183	910	2606	0
3	5	18	iYNL267W	iYNL267W	12240	17490	140	662	627	345	51	54	21	93	90	0	1411	1263	775	64	74	109	85	82	0	0.454	0.48	0.478	0.571	2.039	0.456	0.924	156	606	1958	1775	-1.141	611	1347	576	1199	0
3	6	18	iYNL262W	iYNL262W	12440	17490	140	2687	2219	1236	52	55	21	95	93	0	1972	1567	924	65	68	27	89	86	0	1.382	1.443	1.396	1.602	1.937	1.424	0.932	156	636	4542	3669	0.466	2635	1907	2167	1502	0
3	7	18	iYNL244C	iYNL244C	12650	17480	140	1474	1229	650	51	53	13	96	93	0	2889	2386	1342	64	66	24	91	87	0	0.504	0.507	0.502	0.565	1.895	0.493	0.948	156	661	4248	3500	-0.989	1423	2825	1178	2322	0
3	8	18	iYNL240C	iYNL240C	12850	17480	130	385	346	170	50	51	11	93	89	0	1703	1533	840	61	66	81	86	85	0	0.204	0.201	0.2	0.217	1.715	0.192	0.918	120	553	1977	1768	-2.293	335	1642	296	1472	0
3	9	18	iYNL235C	iYNL235C	13050	17480	140	1170	1069	590	50	51	11	96	95	0	1803	1519	849	62	66	80	89	86	0	0.643	0.699	0.68	0.717	1.736	0.688	0.928	156	584	2861	2476	-0.636	1120	1741	1019	1457	0
3	10	18	iYNL217W	iYNL217W	13240	17470	140	544	476	258	50	51	11	92	91	0	2646	2359	1436	62	68	83	86	84	0	0.191	0.185	0.181	0.194	1.805	0.177	0.925	156	558	3078	2723	-2.387	494	2584	426	2297	0
3	11	18	iYNL213C	iYNL213C	13450	17470	140	361	323	153	50	51	12	91	89	0	2737	2295	1273	63	69	83	91	90	0	0.116	0.122	0.12	0.137	2.091	0.117	0.921	156	563	2985	2505	-3.104	311	2674	273	2232	0
3	12	18	iYNL209W	iYNL209W	13660	17470	140	1967	1783	1004	52	52	12	98	97	0	2235	1899	1120	63	67	48	92	90	0	0.882	0.943	0.935	1.019	1.741	0.923	0.943	156	522	4087	3567	-0.182	1915	2172	1731	1836	0
3	13	18	iYNL189W	iYNL189W	13840	17460	140	1274	1093	648	53	59	32	92	89	0	2253	1809	1173	65	75	61	87	83	0	0.558	0.596	0.591	0.691	2.235	0.57	0.939	156	535	3409	2784	-0.842	1221	2188	1040	1744	0
3	14	18	iYNL184C	iYNL184C	14050	17460	140	1069	930	495	51	55	19	93	89	0	1919	1589	880	64	72	111	87	83	0	0.549	0.576	0.57	0.622	2.044	0.558	0.929	156	570	2873	2404	-0.866	1018	1855	879	1525	0
3	15	18	iYNL179C-0	iYNL179C-0	14250	17460	130	580	547	284	50	51	12	91	91	0	2030	1917	1169	62	68	113	85	83	0	0.269	0.268	0.26	0.29	1.841	0.248	0.909	120	540	2498	2352	-1.893	530	1968	497	1855	0
3	16	18	iYOL125W	iYOL125W	14460	17460	140	460	407	195	50	51	11	94	91	0	1321	1102	618	62	62	30	91	88	0	0.326	0.343	0.334	0.368	1.903	0.322	0.915	156	590	1669	1397	-1.619	410	1259	357	1040	0
3	17	18	iYOL121C	iYOL121C	14640	17450	130	1424	1203	680	50	54	22	90	90	0	3871	3125	1978	63	68	39	91	90	0	0.361	0.377	0.357	0.378	1.772	0.351	0.939	120	534	5182	4215	-1.471	1374	3808	1153	3062	0
3	18	18	iYOL117W	iYOL117W	14860	17460	140	1652	1429	805	50	56	63	90	87	0	4596	3812	2346	63	81	220	85	81	0	0.353	0.368	0.366	0.443	2.186	0.354	0.944	156	602	6135	5128	-1.501	1602	4533	1379	3749	0
3	19	18	iYOLWdelta5	iYOLWdelta5	15060	17450	140	1027	905	509	49	54	63	88	84	0	3123	2639	1674	61	78	225	85	81	0	0.319	0.332	0.326	0.379	1.971	0.313	0.934	156	571	4040	3434	-1.647	978	3062	856	2578	0
3	20	18	iYOL099C	iYOL099C	15260	17450	140	2793	2523	1422	49	51	13	100	98	0	1757	1463	846	61	62	23	93	92	0	1.618	1.765	1.793	2.009	1.874	1.768	0.941	156	575	4440	3876	0.694	2744	1696	2474	1402	0
3	21	18	iYOL096C	iYOL096C	15460	17450	140	1421	1292	732	49	50	12	98	96	0	1972	1746	1101	61	61	19	90	87	0	0.718	0.738	0.741	0.904	1.984	0.707	0.947	156	756	3283	2928	-0.478	1372	1911	1243	1685	0
3	1	19	iYOL081W	iYOL081W	11460	17700	140	1617	1428	730	51	52	12	98	96	0	3165	2559	1505	64	64	22	94	94	0	0.505	0.552	0.546	0.643	1.827	0.515	0.919	156	696	4667	3872	-0.986	1566	3101	1377	2495	0
3	2	19	iYOL076W	iYOL076W	11660	17690	140	2738	2436	1319	51	54	18	99	98	0	1093	951	523	66	66	22	92	89	0	2.616	2.695	2.637	2.878	1.767	2.7	0.932	156	587	3714	3270	1.388	2687	1027	2385	885	0
3	3	19	iYOL071W	iYOL071W	11860	17690	130	894	816	420	51	54	18	95	93	0	816	708	371	67	68	25	91	90	0	1.126	1.193	1.166	1.223	1.626	1.169	0.904	120	537	1592	1406	0.171	843	749	765	641	0
3	4	19	iYOL055C	iYOL055C	12060	17690	140	1091	995	555	51	52	13	94	94	0	2315	2053	1293	64	71	92	85	82	0	0.462	0.475	0.466	0.569	2.272	0.445	0.923	156	589	3291	2933	-1.114	1040	2251	944	1989	0
3	5	19	iYOL054W	iYOL054W	12260	17680	130	840	728	369	51	53	14	95	93	0	2495	2048	1070	63	71	98	91	88	0	0.324	0.341	0.333	0.337	1.669	0.33	0.928	120	531	3221	2662	-1.624	789	2432	677	1985	0
3	6	19	iYOL050C	iYOL050C	12460	17680	130	395	375	171	51	53	13	95	90	0	1112	932	494	67	68	29	90	90	0	0.329	0.375	0.367	0.407	1.704	0.343	0.903	120	558	1389	1189	-1.603	344	1045	324	865	0
3	7	19	iYOR248W	iYOR248W	12670	17680	140	2328	2141	1302	51	53	13	96	96	0	2969	2511	1603	63	65	23	91	89	0	0.784	0.854	0.843	0.921	1.884	0.83	0.936	156	574	5183	4538	-0.352	2277	2906	2090	2448	0
3	8	19	iYOR252W	iYOR252W	12860	17670	140	880	726	438	50	53	16	92	90	0	1572	1339	862	62	70	80	83	81	0	0.55	0.529	0.517	0.531	1.942	0.51	0.938	156	557	2340	1953	-0.863	830	1510	676	1277	0
3	9	19	iYOR256C	iYOR256C	13070	17670	150	945	816	482	50	52	15	94	94	0	3060	2480	1595	61	70	82	91	87	0	0.298	0.317	0.317	0.355	1.877	0.3	0.925	156	552	3894	3185	-1.745	895	2999	766	2419	0
3	10	19	iYOR272W	iYOR272W	13270	17670	140	1488	1409	769	50	51	11	98	98	0	2552	2166	1287	62	66	37	94	92	0	0.578	0.646	0.649	0.699	1.836	0.617	0.927	156	498	3928	3463	-0.792	1438	2490	1359	2104	0
3	11	19	iYOR277C	iYOR277C	13460	17670	140	1873	1636	826	51	52	12	100	100	0	4321	3885	2071	64	67	34	98	98	0	0.428	0.415	0.413	0.441	1.662	0.401	0.94	156	520	6079	5406	-1.224	1822	4257	1585	3821	0
3	12	19	iYOR283W	iYOR283W	13660	17670	140	1230	1099	540	51	52	13	99	97	0	2981	2525	1308	65	68	55	94	93	0	0.404	0.426	0.436	0.451	1.584	0.412	0.939	156	528	4095	3508	-1.306	1179	2916	1048	2460	0
3	13	19	iYOR298W	iYOR298W	13850	17660	140	930	827	536	52	55	19	92	91	0	1328	1172	803	65	71	59	81	77	0	0.695	0.7	0.71	0.776	2.116	0.674	0.925	156	546	2141	1882	-0.525	878	1263	775	1107	0
3	14	19	iYOR303W	iYOR303W	14060	17660	140	996	893	478	51	55	19	96	93	0	1892	1648	925	64	73	110	90	88	0	0.517	0.532	0.529	0.559	1.603	0.51	0.914	156	587	2773	2426	-0.952	945	1828	842	1584	0
3	15	19	iYOR306C	iYOR306C	14260	17660	140	2399	2187	1318	50	52	14	100	98	0	3272	2984	1893	63	68	107	89	88	0	0.732	0.732	0.741	0.875	2.198	0.711	0.937	156	584	5558	5058	-0.45	2349	3209	2137	2921	0
3	16	19	iYOR322C	iYOR322C	14460	17660	140	1791	1534	935	50	51	12	96	96	0	3682	3193	2126	63	61	19	96	94	0	0.481	0.474	0.479	0.561	1.944	0.451	0.942	156	549	5360	4614	-1.056	1741	3619	1484	3130	0
3	17	19	iYOR327C	iYOR327C	14650	17650	130	592	516	292	51	55	22	92	89	0	3233	2647	1648	64	72	48	90	89	0	0.171	0.18	0.183	0.198	1.795	0.173	0.93	120	546	3710	3048	-2.55	541	3169	465	2583	0
3	18	19	iYOR332W	iYOR332W	14860	17650	140	1434	1315	772	51	57	63	91	88	0	3793	3351	2101	64	88	235	88	83	0	0.371	0.385	0.385	0.415	1.638	0.363	0.897	156	581	5112	4551	-1.431	1383	3729	1264	3287	0
3	19	19	iYPL045W	iYPL045W	15060	17650	140	791	686	401	50	55	65	83	78	0	2148	1702	1085	62	79	231	80	75	0	0.355	0.388	0.386	0.438	2.19	0.372	0.934	156	539	2827	2276	-1.493	741	2086	636	1640	0
3	20	19	iYPL040C	iYPL040C	15260	17640	140	568	511	310	50	52	14	94	87	0	2957	2533	1777	61	67	48	88	84	0	0.179	0.186	0.193	0.232	2.077	0.174	0.923	156	545	3414	2933	-2.483	518	2896	461	2472	0
3	21	19	iYPL036W	iYPL036W	15470	17650	140	2831	2365	1344	50	52	13	97	95	0	5171	4109	2571	60	63	41	90	88	0	0.544	0.572	0.568	0.658	1.975	0.549	0.947	156	702	7892	6364	-0.878	2781	5111	2315	4049	0
3	1	20	iYPL017C	iYPL017C	11470	17890	130	447	398	215	52	55	22	91	86	0	1569	1250	763	66	69	32	87	83	0	0.263	0.292	0.306	0.355	2.594	0.279	0.879	120	712	1898	1530	-1.928	395	1503	346	1184	0
3	2	20	iYPL013C	iYPL013C	11670	17890	140	1153	1080	648	51	54	17	96	94	0	2466	2174	1337	65	66	22	92	92	0	0.459	0.488	0.5	0.548	2.447	0.471	0.908	156	735	3503	3138	-1.124	1102	2401	1029	2109	0
3	3	20	iYPL009C	iYPL009C	11870	17890	140	777	699	393	51	56	22	91	87	0	2097	1839	1172	66	71	36	87	85	0	0.357	0.365	0.362	0.398	2.517	0.338	0.894	156	733	2757	2421	-1.484	726	2031	648	1773	0
3	4	20	iYPR005C	iYPR005C	12070	17890	140	1039	953	596	53	58	25	94	91	0	1738	1582	1114	67	75	46	88	82	0	0.59	0.594	0.606	0.703	2.119	0.557	0.917	156	729	2657	2415	-0.761	986	1671	900	1515	0
3	5	20	itG(GCC)P1	itG(GCC)P1	12270	17880	150	1314	1096	597	52	56	22	98	96	0	1916	1643	920	67	77	106	91	88	0	0.683	0.662	0.655	0.696	1.793	0.642	0.898	156	795	3111	2620	-0.551	1262	1849	1044	1576	0
3	6	20	itK(CUU)P	itK(CUU)P	12470	17880	140	1858	1638	849	51	54	17	96	95	0	5129	4182	2277	67	73	106	92	89	0	0.357	0.386	0.393	0.403	2.026	0.37	0.919	156	744	6869	5702	-1.486	1807	5062	1587	4115	0
3	7	20	iYPR024W	iYPR024W	12670	17880	140	1806	1594	873	51	53	13	98	97	0	3798	3139	1823	63	69	85	92	89	0	0.47	0.502	0.522	0.543	2.086	0.486	0.92	156	722	5490	4619	-1.09	1755	3735	1543	3076	0
3	8	20	itF(GAA)P2	itF(GAA)P2	12870	17870	140	1331	1187	725	50	53	16	97	93	0	2639	2274	1515	63	70	87	87	85	0	0.497	0.514	0.514	0.592	2.258	0.486	0.91	156	721	3857	3348	-1.008	1281	2576	1137	2211	0
3	9	20	iYPR031W	iYPR031W	13080	17870	140	795	668	370	50	52	14	94	91	0	1252	1052	603	61	65	33	89	87	0	0.626	0.624	0.628	0.625	2.145	0.607	0.91	156	714	1936	1609	-0.677	745	1191	618	991	0
3	10	20	CEN3	CEN3	13270	17860	140	223	216	110	50	51	12	89	87	0	321	293	174	62	63	26	80	75	0	0.668	0.719	0.655	0.662	1.871	0.656	0.845	156	652	432	397	-0.582	173	259	166	231	0
3	11	20	iRDN5-2	iRDN5-2	13470	17860	140	119	119	43	50	51	12	89	81	0	266	237	121	63	76	243	32	0	0	0.34	0.397	0.388	0.392	2.02	0.154	0.319	156	692	272	243	-1.557	69	203	69	174	0
3	12	20	itN(GUU)C	itN(GUU)C	13670	17860	130	126	134	58	50	52	13	86	82	0	245	239	124	63	69	113	72	35	0	0.418	0.477	0.452	0.421	1.905	0.168	0.271	120	618	258	260	-1.26	76	182	84	176	0
3	13	20	iYCL018W	iYCL018W	13870	17860	140	3269	2956	1507	51	56	30	100	100	0	1988	1636	892	65	67	39	93	92	0	1.673	1.849	1.836	2.089	1.925	1.836	0.933	156	728	5141	4476	0.743	3218	1923	2905	1571	0
3	14	20	iYCR003W	iYCR003W	14070	17860	140	924	875	474	51	56	30	95	94	0	1139	944	538	64	67	32	90	89	0	0.812	0.936	0.95	1.031	1.892	0.913	0.902	156	732	1948	1704	-0.3	873	1075	824	880	0
3	15	20	iYCR007C	iYCR007C	14280	17860	140	377	348	155	51	52	14	94	92	0	2939	2568	1317	63	65	27	97	96	0	0.113	0.119	0.123	0.127	1.813	0.049	0.401	156	726	3202	2802	-3.141	326	2876	297	2505	0
3	16	20	iYHR212C	iYHR212C	14480	17850	140	3139	3070	2030	50	51	12	99	99	0	4462	3987	2650	63	63	23	96	94	0	0.702	0.77	0.795	0.813	1.993	0.758	0.913	156	690	7488	6944	-0.51	3089	4399	3020	3924	0
3	17	20	iYHR214W-A	iYHR214W-A	14680	17850	140	508	473	268	51	52	13	95	91	0	1075	956	545	64	69	70	91	86	0	0.452	0.473	0.478	0.471	1.985	0.456	0.879	156	728	1468	1314	-1.146	457	1011	422	892	0
3	18	20	iYHR218W	iYHR218W	14880	17850	140	8290	7185	4156	53	55	23	100	100	0	11818	9994	5562	64	69	73	99	96	0	0.701	0.718	0.742	0.734	1.642	0.72	0.932	156	708	19991	17062	-0.513	8237	11754	7132	9930	0
3	19	20	iYLR162W-A	iYLR162W-A	15080	17850	140	2630	2545	1754	50	54	23	97	97	0	4387	4277	2964	62	64	40	96	94	0	0.597	0.592	0.612	0.639	1.873	0.577	0.916	156	717	6905	6710	-0.745	2580	4325	2495	4215	0
3	20	20	iYLRWdelta6-B	iYLRWdelta6-B	15280	17840	150	4728	3867	2661	50	53	16	98	97	0	5541	4835	3428	60	65	42	94	92	0	0.853	0.799	0.812	0.865	2.01	0.783	0.913	156	760	10159	8592	-0.229	4678	5481	3817	4775	0
3	21	20	RDN5-1	RDN5-1	15480	17840	140	538	527	322	50	51	15	94	89	0	954	863	550	59	62	39	86	83	0	0.545	0.593	0.591	0.639	1.912	0.575	0.898	156	850	1383	1281	-0.875	488	895	477	804	0
4	1	1	TFC3	YAL001C	15870	13940	140	17007	14762	8384	51	52	11	99	99	0	7179	6496	3493	59	62	58	93	93	0	2.381	2.285	2.251	2.257	1.642	2.375	0.944	156	724	24076	21148	1.252	16956	7120	14711	6437	0
4	2	1	FUN19	YAL034C	16060	13940	120	8634	8585	3091	52	54	15	100	100	0	10145	9441	3385	59	70	153	100	99	0	0.851	0.91	0.892	0.928	1.393	0.906	0.959	120	621	18668	17915	-0.233	8582	10086	8533	9382	0
4	3	1	YAL065C	YAL065C	16270	13950	130	14184	13391	4390	52	53	14	100	100	0	23565	21552	7835	60	68	141	100	100	0	0.601	0.621	0.615	0.655	1.485	0.596	0.959	120	675	37637	34831	-0.734	14132	23505	13339	21492	0
4	4	1	EFB1	YAL003W	16470	13940	130	3557	3184	1031	51	52	12	100	100	0	7394	6546	2274	60	60	28	98	97	0	0.478	0.483	0.48	0.514	1.458	0.466	0.961	120	691	10840	9619	-1.065	3506	7334	3133	6486	0
4	5	1	YAL035C-A	YAL035C-A	16690	13940	140	9553	8298	2992	50	52	13	100	100	0	5109	4430	1588	60	63	88	98	98	0	1.882	1.887	1.884	1.937	1.44	1.901	0.967	156	729	14552	12618	0.912	9503	5049	8248	4370	0
4	6	1	YAL066W	YAL066W	16880	13930	140	2470	2154	812	50	52	12	100	100	0	3369	2829	1132	60	62	85	97	96	0	0.731	0.76	0.759	0.804	1.476	0.745	0.957	156	728	5729	4873	-0.451	2420	3309	2104	2769	0
4	7	1	SSA1	YAL005C	17080	13930	120	6055	5406	2042	51	65	120	96	95	0	14913	12816	5083	60	94	602	94	93	0	0.404	0.42	0.421	0.456	1.508	0.408	0.96	120	626	20857	18111	-1.307	6004	14853	5355	12756	0
4	8	1	FUN11	YAL036C	17300	13930	130	6403	5382	2282	52	67	124	98	96	0	12844	10503	4568	60	90	572	95	94	0	0.497	0.51	0.514	0.543	1.4	0.494	0.95	120	694	19135	15773	-1.009	6351	12784	5330	10443	0
4	9	1	YAL068C	YAL068C	17490	13920	130	19513	16656	6364	53	101	239	97	96	0	28179	23567	9752	63	97	195	95	95	0	0.692	0.706	0.703	0.801	1.603	0.691	0.963	120	711	47576	40107	-0.531	19460	28116	16603	23504	0
4	10	1	FUN14	YAL008W	17710	13920	130	12076	10383	4966	51	99	243	97	95	0	8759	7338	3632	60	94	195	95	93	0	1.382	1.42	1.423	1.528	1.545	1.423	0.962	120	658	20724	17610	0.467	12025	8699	10332	7278	0
4	11	1	CDC19	YAL038W	17880	13920	130	8744	7875	2821	50	52	17	100	100	0	11405	9720	3759	58	62	79	97	96	0	0.766	0.81	0.8	0.879	1.456	0.778	0.96	120	617	20041	17487	-0.384	8694	11347	7825	9662	0
4	12	1	ERP1	YAR002C-A	18080	13920	130	410	850	849	50	52	17	96	94	0	676	1551	1734	57	62	70	88	82	0	0.582	0.535	0.59	0.667	1.897	0.494	0.922	120	664	979	2294	-0.782	360	619	800	1494	0
4	13	1	RPB5	YBR154C	18290	13910	140	6367	5444	2156	49	51	15	100	100	0	8912	7286	3312	59	58	28	99	97	0	0.714	0.747	0.734	0.863	1.771	0.717	0.967	156	817	15171	12622	-0.487	6318	8853	5395	7227	0
4	14	1	MBA1	YBR185C	18510	13910	130	3463	3160	1378	50	53	36	98	95	0	7303	6716	4138	59	75	286	92	90	0	0.471	0.467	0.493	0.545	2.035	0.384	0.756	120	676	10657	9767	-1.086	3413	7244	3110	6657	0
4	15	1	APG12	YBR217W	18700	13900	130	4024	3556	1185	50	54	36	100	100	0	8368	7135	2573	59	76	287	95	93	0	0.478	0.495	0.5	0.525	1.309	0.483	0.97	120	666	12283	10582	-1.064	3974	8309	3506	7076	0
4	16	1	SLI15	YBR156C	18890	13900	130	9598	8821	2948	49	51	14	100	100	0	16496	14323	5448	60	61	40	99	98	0	0.581	0.615	0.614	0.683	1.501	0.595	0.967	120	674	25985	23035	-0.783	9549	16436	8772	14263	0
4	17	1	YBR187W	YBR187W	19090	13900	120	2590	2590	1125	49	51	12	100	100	0	4241	4178	1907	60	66	118	96	95	0	0.608	0.617	0.629	0.671	1.484	0.602	0.96	120	640	6722	6659	-0.718	2541	4181	2541	4118	0
4	18	1	YBR219C	YBR219C	19310	13900	130	1040	953	323	49	50	11	99	99	0	8677	7548	2835	58	77	280	95	94	0	0.115	0.121	0.12	0.134	1.621	0.115	0.951	120	710	9610	8394	-3.121	991	8619	904	7490	0
4	19	1	ICS4	YBR158W	19500	13900	130	3575	3192	1159	49	50	13	100	100	0	12974	11181	4466	58	63	83	97	96	0	0.273	0.283	0.281	0.328	1.807	0.275	0.957	120	662	16442	14266	-1.873	3526	12916	3143	11123	0
4	20	1	RPS9B	YBR189W	19690	13900	130	8757	7690	2846	50	52	19	100	100	0	10659	8962	3627	59	63	65	99	98	0	0.821	0.858	0.85	0.924	1.509	0.846	0.965	120	689	19307	16543	-0.284	8707	10600	7640	8903	0
4	21	1	PDB1	YBR221C	19900	13900	130	1137	1034	359	48	51	17	100	100	0	11492	9911	3801	58	66	152	96	95	0	0.095	0.1	0.099	0.114	1.933	0.096	0.949	120	794	12523	10839	-3.392	1089	11434	986	9853	0
4	1	2	CDC28	YBR160W	15900	14140	140	5470	4760	1731	52	53	11	100	100	0	15025	12641	5032	59	60	46	99	99	0	0.362	0.374	0.371	0.404	1.56	0.362	0.963	156	669	20384	17290	-1.466	5418	14966	4708	12582	0
4	2	2	RPL21A	YBR191W	16110	14150	130	3628	3124	1159	52	54	15	99	99	0	8868	7475	2971	59	66	131	95	95	0	0.406	0.414	0.413	0.442	1.389	0.402	0.963	120	568	12385	10488	-1.301	3576	8809	3072	7416	0
4	3	2	YBR223C	YBR223C	16300	14130	130	2297	2080	726	51	56	48	100	96	0	10190	8888	3257	60	67	90	97	96	0	0.222	0.23	0.229	0.248	1.443	0.225	0.969	120	606	12376	10857	-2.173	2246	10130	2029	8828	0
4	4	2	RPN4	YDL020C	16510	14130	130	2504	2408	839	52	53	11	100	99	0	3162	3019	1130	60	60	29	96	94	0	0.79	0.796	0.796	0.853	1.471	0.77	0.954	120	593	5554	5315	-0.339	2452	3102	2356	2959	0
4	5	2	SLC1	YDL052C	16710	14130	140	600	591	238	51	53	14	97	96	0	2842	2645	1200	58	59	41	96	94	0	0.197	0.209	0.211	0.227	1.647	0.201	0.947	156	613	3333	3127	-2.342	549	2784	540	2587	0
4	6	2	SUB2	YDL084W	16910	14130	130	3226	3241	1289	51	54	25	100	99	0	4157	3879	1556	59	64	102	97	95	0	0.775	0.835	0.828	0.871	1.333	0.821	0.968	120	574	7273	7010	-0.368	3175	4098	3190	3820	0
4	7	2	GPD1	YDL022W	17120	14120	130	1372	1270	419	53	66	110	98	95	0	5483	4949	1837	61	100	636	95	93	0	0.243	0.249	0.249	0.265	1.428	0.239	0.958	120	634	6741	6105	-2.039	1319	5422	1217	4888	0
4	8	2	YDL054C	YDL054C	17330	14120	130	2641	2401	941	52	79	160	95	94	0	8210	7307	3076	61	150	807	90	88	0	0.318	0.324	0.319	0.355	1.447	0.31	0.958	120	577	10738	9595	-1.654	2589	8149	2349	7246	-100
4	9	2	YDL086W	YDL086W	17500	14130	120	905	819	319	53	69	113	92	91	0	4347	3809	1617	61	134	504	90	90	0	0.199	0.204	0.206	0.214	1.424	0.202	0.97	120	544	5138	4514	-2.331	852	4286	766	3748	-100
4	10	2	YDL024C	YDL024C	17720	14120	140	2199	1951	768	50	64	91	98	96	0	6642	5906	2411	59	80	148	98	96	0	0.326	0.325	0.329	0.344	1.488	0.32	0.974	156	666	8732	7748	-1.615	2149	6583	1901	5847	0
4	11	2	MBP1	YDL056W	17920	14120	140	1033	1044	519	50	60	109	94	90	0	1943	1867	930	57	63	71	96	94	0	0.521	0.549	0.542	0.574	1.43	0.544	0.962	156	621	2869	2804	-0.94	983	1886	994	1810	0
4	12	2	ASM4	YDL088C	18120	14120	140	827	830	368	51	61	109	96	93	0	2525	2332	1060	60	65	73	96	96	0	0.315	0.343	0.346	0.369	1.653	0.338	0.961	156	624	3241	3051	-1.667	776	2465	779	2272	0
4	13	2	YDL026W	YDL026W	18320	14110	130	1089	1029	371	50	52	19	99	97	0	7148	6211	2256	59	60	39	97	96	0	0.147	0.159	0.157	0.168	1.427	0.153	0.945	120	593	8128	7131	-2.77	1039	7089	979	6152	0
4	14	2	USO1	YDL058W	18530	14110	140	1765	1769	847	51	55	38	97	95	0	4219	3923	1883	59	74	284	92	92	0	0.412	0.445	0.442	0.484	1.652	0.433	0.946	156	673	5874	5582	-1.279	1714	4160	1718	3864	0
4	15	2	RAM1	YDL090C	18720	14110	130	2368	2176	839	51	54	23	100	97	0	7195	6371	2610	61	80	303	95	93	0	0.325	0.337	0.335	0.365	1.481	0.326	0.967	120	620	9451	8435	-1.622	2317	7134	2125	6310	0
4	16	2	CPH1	YDR155C	18930	14100	130	1414	1331	485	50	53	20	100	99	0	3607	3360	1297	60	65	74	96	95	0	0.385	0.388	0.391	0.417	1.511	0.381	0.955	120	610	4911	4581	-1.379	1364	3547	1281	3300	0
4	17	2	YDR186C	YDR186C	19110	14100	130	435	442	272	50	51	12	95	94	0	1010	1063	721	58	67	124	89	85	0	0.404	0.39	0.378	0.425	1.883	0.38	0.963	120	615	1337	1397	-1.306	385	952	392	1005	0
4	18	2	SPR28	YDR218C	19330	14100	130	449	465	186	49	50	12	98	95	0	1260	1242	521	58	73	269	91	90	0	0.333	0.351	0.343	0.359	1.409	0.335	0.917	120	657	1602	1600	-1.587	400	1202	416	1184	0
4	19	2	YDR157W	YDR157W	19530	14100	130	1487	1335	477	50	52	22	100	100	0	4785	4053	1563	59	63	62	100	98	0	0.304	0.322	0.322	0.344	1.374	0.312	0.961	120	591	6163	5279	-1.718	1437	4726	1285	3994	0
4	20	2	CCT6	YDR188W	19720	14100	130	1214	1114	486	49	51	12	100	100	0	7129	6803	3248	58	57	23	100	99	0	0.165	0.158	0.157	0.174	1.503	0.154	0.962	120	590	8236	7810	-2.602	1165	7071	1065	6745	0
4	21	2	YDR220C	YDR220C	19920	14100	130	714	698	212	48	49	11	100	100	0	4747	4394	1535	58	66	163	99	97	0	0.142	0.15	0.145	0.161	1.479	0.144	0.95	120	669	5355	4986	-2.816	666	4689	650	4336	0
4	1	3	SAC3	YDR159W	15930	14340	140	5316	4916	2262	53	53	12	100	100	0	12130	10419	5000	60	60	31	100	99	0	0.436	0.469	0.472	0.509	1.597	0.459	0.955	156	706	17333	15222	-1.197	5263	12070	4863	10359	0
4	2	3	RVB1	YDR190C	16130	14340	140	3398	3302	1482	52	53	11	100	100	0	4676	4453	2160	60	64	72	99	96	0	0.725	0.74	0.741	0.811	1.65	0.72	0.949	156	604	7962	7643	-0.464	3346	4616	3250	4393	0
4	3	3	YDR222W	YDR222W	16330	14350	130	1959	1985	818	52	69	151	95	95	0	5331	4999	2228	61	75	131	95	95	0	0.362	0.391	0.388	0.413	1.431	0.375	0.95	120	606	7177	6871	-1.466	1907	5270	1933	4938	0
4	4	3	TCI1	YDR161W	16540	14330	130	8762	7703	2829	53	75	169	98	96	0	9181	7856	3025	61	71	109	98	97	0	0.955	0.981	0.979	1.029	1.405	0.984	0.965	120	637	17829	15445	-0.067	8709	9120	7650	7795	0
4	5	3	NUP42	YDR192C	16750	14340	130	4597	4137	1375	52	60	87	100	99	0	11271	9767	3547	60	61	48	100	100	0	0.405	0.421	0.419	0.443	1.301	0.414	0.967	120	590	15756	13792	-1.303	4545	11211	4085	9707	0
4	6	3	HTB1	YDR224C	16940	14330	140	4252	3700	1628	51	57	45	99	98	0	6327	5171	2504	60	74	179	96	93	0	0.67	0.714	0.715	0.785	1.53	0.693	0.963	156	660	10468	8760	-0.577	4201	6267	3649	5111	0
4	7	3	PAD1	YDR538W	17140	14320	130	1526	1444	488	52	56	34	100	98	0	6520	5946	2146	60	64	96	99	95	0	0.228	0.236	0.241	0.251	1.387	0.227	0.95	120	580	7934	7278	-2.132	1474	6460	1392	5886	0
4	8	3	RIP1	YEL024W	17330	14330	130	2393	2126	732	51	60	84	96	96	0	7533	6536	2562	61	84	277	95	93	0	0.313	0.32	0.316	0.356	1.567	0.306	0.96	120	589	9814	8550	-1.674	2342	7472	2075	6475	0
4	9	3	HAT2	YEL056W	17530	14330	130	2205	2091	801	51	61	49	98	96	0	3979	3750	1591	61	91	192	95	93	0	0.55	0.553	0.541	0.589	1.411	0.53	0.954	120	628	6072	5729	-0.863	2154	3918	2040	3689	0
4	10	3	YDR540C	YDR540C	17740	14320	130	1479	1410	535	50	59	53	98	96	0	4193	3875	1588	60	79	159	96	93	0	0.346	0.356	0.352	0.372	1.26	0.345	0.965	120	608	5562	5175	-1.532	1429	4133	1360	3815	0
4	11	3	SNU13	YEL026W	17940	14330	130	10193	9005	3024	51	64	116	99	97	0	6135	5274	1899	59	76	180	95	95	0	1.669	1.717	1.707	1.808	1.313	1.716	0.961	120	599	16218	14169	0.739	10142	6076	8954	5215	0
4	12	3	PCM1	YEL058W	18140	14310	130	5178	4739	1514	51	67	131	99	97	0	9813	9055	2980	60	71	154	98	95	0	0.526	0.521	0.526	0.552	1.438	0.507	0.965	120	582	14880	13683	-0.928	5127	9753	4688	8995	0
4	13	3	YDR542W	YDR542W	18330	14320	130	18341	16199	5875	51	56	43	100	100	0	27767	23282	9089	61	66	81	96	95	0	0.66	0.695	0.69	0.798	1.82	0.679	0.971	120	612	45996	39369	-0.599	18290	27706	16148	23221	0
4	14	3	YEL028W	YEL028W	18540	14310	130	1847	1787	692	52	57	42	99	96	0	3858	3631	1424	60	68	97	96	95	0	0.473	0.486	0.488	0.505	1.293	0.477	0.958	120	648	5593	5306	-1.081	1795	3798	1735	3571	0
4	15	3	YEL059W	YEL059W	18750	14300	100	165	651	1073	52	53	13	93	86	0	218	1308	2415	62	71	104	66	42	0	0.724	0.481	0.616	0.604	1.851	0.441	0.941	80	452	269	1845	-0.465	113	156	599	1246	0
4	16	3	YDR544C	YDR544C	18940	14310	130	34300	29495	10616	52	55	23	100	100	0	45365	38194	14810	59	65	78	100	100	0	0.756	0.772	0.764	0.811	1.356	0.755	0.969	120	619	79554	67578	-0.404	34248	45306	29443	38135	0
4	17	3	ECM10	YEL030W	19140	14300	130	9392	8480	3008	50	54	25	100	100	0	10707	9306	3471	59	62	56	99	98	0	0.877	0.912	0.913	0.967	1.451	0.903	0.968	120	633	19990	17677	-0.189	9342	10648	8430	9247	0
4	18	3	CIN8	YEL061C	19340	14310	130	1104	1094	467	49	52	19	98	98	0	1748	1718	777	59	64	63	96	95	0	0.625	0.63	0.632	0.657	1.414	0.615	0.951	120	614	2744	2704	-0.679	1055	1689	1045	1659	0
4	19	3	YFR022W	YFR022W	19530	14300	130	8749	7779	2713	51	56	34	100	100	0	14092	12070	4727	61	69	64	99	97	0	0.62	0.644	0.627	0.679	1.383	0.627	0.968	120	641	22729	19737	-0.69	8698	14031	7728	12009	0
4	20	3	RPN12	YFR052W	19760	14290	130	2249	2043	676	51	69	158	95	94	0	6665	5840	2017	60	74	113	98	96	0	0.333	0.345	0.341	0.356	1.277	0.333	0.953	120	632	8803	7772	-1.587	2198	6605	1992	5780	0
4	21	3	CWH41	YGL027C	19950	14290	130	8617	8009	2675	50	63	150	100	97	0	16969	14983	5644	59	63	96	100	99	0	0.507	0.533	0.516	0.558	1.276	0.514	0.96	120	682	25477	22883	-0.981	8567	16910	7959	14924	0
4	1	4	YFR024C	YFR024C	15940	14540	130	14648	12675	4535	53	56	18	100	100	0	13278	11235	4428	62	67	77	99	98	0	1.104	1.13	1.115	1.216	1.421	1.106	0.956	120	660	27811	23795	0.143	14595	13216	12622	11173	0
4	2	4	YFR054C	YFR054C	16140	14540	140	5566	4820	1681	53	54	14	100	100	0	6225	5301	2082	61	65	70	98	98	0	0.894	0.91	0.904	0.993	1.598	0.884	0.956	156	625	11677	10007	-0.161	5513	6164	4767	5240	0
4	3	4	CGR1	YGL029W	16350	14540	140	2907	2579	875	52	62	134	96	96	0	4241	3716	1357	60	60	24	98	97	0	0.683	0.691	0.68	0.741	1.542	0.675	0.955	156	629	7036	6183	-0.55	2855	4181	2527	3656	0
4	4	4	HIS2	YFR025C	16550	14540	140	6085	5269	1905	52	67	150	98	96	0	10335	8706	3504	61	66	73	97	96	0	0.587	0.603	0.597	0.685	1.766	0.583	0.952	156	670	16307	13862	-0.768	6033	10274	5217	8645	0
4	5	4	YFR056C	YFR056C	16750	14540	130	2292	2008	747	52	58	73	96	95	0	5230	4376	1760	61	66	78	95	95	0	0.433	0.453	0.458	0.481	1.509	0.443	0.95	120	563	7409	6271	-1.206	2240	5169	1956	4315	0
4	6	4	RPL24A	YGL031C	16930	14530	130	3434	3073	1100	52	64	115	98	96	0	5374	4747	1793	61	89	276	95	93	0	0.637	0.645	0.638	0.69	1.537	0.634	0.952	120	577	8695	7707	-0.652	3382	5313	3021	4686	0
4	7	4	ECO1	YFR027W	17150	14530	140	8365	7113	2812	52	63	106	98	98	0	12457	10578	4539	61	87	253	95	93	0	0.671	0.671	0.659	0.741	1.63	0.655	0.958	156	696	20709	17578	-0.576	8313	12396	7061	10517	0
4	8	4	YGL001C	YGL001C	17350	14530	140	20273	17119	6624	51	54	20	100	100	0	7097	5939	2447	60	68	109	96	94	0	2.874	2.903	2.869	3.211	1.761	2.902	0.955	156	633	27259	22947	1.523	20222	7037	17068	5879	0
4	9	4	HOP2	YGL033W	17540	14530	130	4615	4240	1616	52	56	26	100	98	0	7467	6862	2527	60	67	87	95	95	0	0.616	0.616	0.628	0.663	1.765	0.605	0.951	120	580	11970	10990	-0.699	4563	7407	4188	6802	0
4	10	4	MRP13	YGR084C	17740	14520	130	7970	6958	2553	52	64	82	100	98	0	11103	9287	3683	61	97	233	95	95	0	0.717	0.749	0.729	0.798	1.675	0.729	0.95	120	630	18960	16132	-0.48	7918	11042	6906	9226	0
4	11	4	SPT6	YGR116W	17940	14520	130	920	998	545	51	72	135	93	90	0	1233	1440	916	61	100	272	89	83	0	0.741	0.687	0.71	0.758	1.703	0.623	0.89	120	608	2041	2326	-0.432	869	1172	947	1379	0
4	12	4	RPL24B	YGR148C	18160	14520	130	4192	3601	1445	51	64	109	97	95	0	7433	6303	2511	60	73	177	95	94	0	0.562	0.569	0.58	0.596	1.785	0.567	0.945	120	623	11514	9793	-0.832	4141	7373	3550	6243	0
4	13	4	YGR086C	YGR086C	18350	14510	130	2954	2567	962	51	57	45	99	97	0	9766	8113	3350	61	64	48	99	97	0	0.299	0.312	0.306	0.337	1.677	0.295	0.947	120	598	12608	10568	-1.741	2903	9705	2516	8052	0
4	14	4	RPS23A	YGR118W	18560	14510	130	7603	6694	2382	51	57	44	100	99	0	11380	9680	3556	61	72	119	95	95	0	0.667	0.691	0.683	0.734	1.71	0.676	0.946	120	631	18871	16262	-0.584	7552	11319	6643	9619	0
4	15	4	YGR150C	YGR150C	18750	14500	130	877	1188	983	52	53	12	97	96	0	1754	2557	2286	60	72	127	92	89	0	0.487	0.455	0.473	0.487	1.502	0.44	0.926	120	600	2519	3633	-1.038	825	1694	1136	2497	0
4	16	4	CTT1	YGR088W	18950	14510	140	3892	3247	1353	51	53	13	100	100	0	14440	11613	5164	59	63	67	99	98	0	0.267	0.277	0.274	0.299	1.598	0.267	0.953	156	663	18222	14750	-1.905	3841	14381	3196	11554	0
4	17	4	SEC35	YGR120C	19150	14510	130	2864	2544	943	49	51	13	100	100	0	9298	7942	3095	59	59	47	98	98	0	0.305	0.317	0.314	0.337	1.608	0.307	0.938	120	579	12054	10378	-1.715	2815	9239	2495	7883	0
4	18	4	RSR1	YGR152C	19340	14510	130	2068	1911	747	50	53	19	100	98	0	9503	8195	3514	60	77	186	96	95	0	0.214	0.229	0.224	0.264	1.964	0.219	0.936	120	593	11461	9996	-2.226	2018	9443	1861	8135	0
4	19	4	YGR090W	YGR090W	19550	14510	140	3763	3752	1923	51	55	24	98	98	0	6669	6038	3200	60	78	178	91	89	0	0.562	0.619	0.605	0.706	2.048	0.606	0.926	156	687	10321	9679	-0.832	3712	6609	3701	5978	0
4	20	4	YGR122W	YGR122W	19750	14500	130	3960	3375	1307	50	54	28	100	99	0	9031	7574	3300	59	63	52	99	97	0	0.436	0.442	0.432	0.485	1.65	0.419	0.942	120	595	12882	10840	-1.198	3910	8972	3325	7515	0
4	21	4	YGR154C	YGR154C	19950	14500	130	1422	1376	514	50	62	148	95	94	0	6910	6248	2667	60	64	90	97	96	0	0.2	0.214	0.205	0.229	1.643	0.199	0.924	120	693	8222	7514	-2.32	1372	6850	1326	6188	0
4	1	5	ORC6	YHR118C	15960	14740	130	1694	1686	710	52	55	18	100	98	0	4319	4105	1828	60	63	65	96	95	0	0.386	0.404	0.408	0.448	1.647	0.396	0.96	120	690	5901	5679	-1.375	1642	4259	1634	4045	0
4	2	5	IMP3	YHR148W	16160	14740	130	2280	2085	602	51	53	12	100	100	0	1826	1677	468	59	58	23	99	99	0	1.261	1.257	1.242	1.285	1.299	1.25	0.967	120	578	3996	3652	0.335	2229	1767	2034	1618	0
4	3	5	YHR180W	YHR180W	16350	14740	130	898	1510	1402	51	52	12	100	100	0	1337	2852	2775	59	60	30	100	100	0	0.663	0.522	0.515	0.537	1.527	0.503	0.95	120	577	2125	4252	-0.593	847	1278	1459	2793	0
4	4	5	MSH1	YHR120W	16550	14740	120	749	781	369	50	51	13	98	97	0	1528	1524	794	61	65	76	95	92	0	0.476	0.5	0.495	0.525	1.361	0.478	0.951	120	542	2166	2194	-1.07	699	1467	731	1463	0
4	5	5	YHR150W	YHR150W	16750	14740	130	914	903	327	50	51	12	100	100	0	5734	5210	2139	60	67	106	96	96	0	0.152	0.166	0.162	0.176	1.524	0.158	0.951	120	611	6538	6003	-2.715	864	5674	853	5150	0
4	6	5	YHR182W	YHR182W	16960	14730	130	818	891	422	52	59	103	95	94	0	1046	1096	525	61	80	224	91	88	0	0.778	0.811	0.809	0.818	1.386	0.78	0.908	120	632	1751	1874	-0.363	766	985	839	1035	0
4	7	5	YHR122W	YHR122W	17150	14740	130	1035	944	368	51	53	14	100	98	0	4332	3859	1686	60	68	80	96	95	0	0.23	0.235	0.232	0.267	1.935	0.208	0.866	120	581	5256	4692	-2.118	984	4272	893	3799	0
4	8	5	SPO12	YHR152W	17350	14730	130	1814	1658	691	51	53	14	97	95	0	5837	5135	2154	61	69	73	95	93	0	0.305	0.317	0.314	0.324	1.41	0.311	0.967	120	593	7539	6681	-1.712	1763	5776	1607	5074	0
4	9	5	SSP1	YHR184W	17560	14730	130	947	934	334	51	53	20	100	97	0	2420	2317	791	61	64	66	97	96	0	0.38	0.391	0.393	0.402	1.424	0.384	0.944	120	594	3255	3139	-1.397	896	2359	883	2256	0
4	10	5	NDT80	YHR124W	17760	14730	130	1636	1572	739	50	58	69	96	93	0	5431	5119	2434	59	72	133	93	92	0	0.295	0.301	0.303	0.332	1.784	0.293	0.949	120	589	6958	6582	-1.76	1586	5372	1522	5060	0
4	11	5	ESC4	YHR154W	17950	14720	140	691	749	501	50	54	35	94	91	0	4542	4558	3203	60	67	82	93	90	0	0.143	0.155	0.153	0.177	1.902	0.153	0.96	156	680	5123	5197	-2.806	641	4482	699	4498	0
4	12	5	YHR186C	YHR186C	18160	14720	140	432	591	497	50	54	54	91	86	0	847	1223	1090	60	64	106	87	85	0	0.485	0.465	0.484	0.519	1.891	0.454	0.958	156	669	1169	1704	-1.043	382	787	541	1163	0
4	13	5	YJL058C	YJL058C	18360	14720	140	8110	6819	3161	50	53	22	100	100	0	12382	9774	4912	60	64	55	98	96	0	0.654	0.697	0.699	0.796	1.626	0.678	0.966	156	654	20382	16483	-0.612	8060	12322	6769	9714	0
4	14	5	DPB11	YJL090C	18550	14720	130	3109	2716	974	51	55	36	100	96	0	13373	11276	4504	61	71	77	97	97	0	0.23	0.238	0.236	0.26	1.488	0.226	0.967	120	592	16370	13880	-2.122	3058	13312	2665	11215	0
4	15	5	YJL122W	YJL122W	18760	14710	140	1907	1617	692	51	54	20	98	98	0	8474	6802	3127	61	79	121	96	94	0	0.221	0.232	0.236	0.259	1.518	0.227	0.968	156	697	10269	8307	-2.18	1856	8413	1566	6741	0
4	16	5	YJL060W	YJL060W	18960	14710	130	4242	3637	1472	49	52	21	99	96	0	9166	7519	3317	60	62	44	96	95	0	0.46	0.481	0.485	0.538	1.482	0.464	0.97	120	578	13299	11047	-1.119	4193	9106	3588	7459	0
4	17	5	HPR5	YJL092W	19160	14700	130	6146	5396	1911	50	52	21	100	100	0	14714	12168	4924	60	62	40	99	99	0	0.416	0.442	0.435	0.479	1.35	0.426	0.972	120	612	20750	17454	-1.265	6096	14654	5346	12108	0
4	18	5	LSM1	YJL124C	19360	14710	130	2676	2348	867	51	53	16	99	99	0	8871	7410	3003	59	69	151	96	95	0	0.298	0.312	0.316	0.343	1.497	0.304	0.972	120	616	11437	9648	-1.747	2625	8812	2297	7351	0
4	19	5	LAS21	YJL062W	19560	14700	130	5888	5326	1956	50	54	26	100	99	0	15766	13896	5524	59	67	150	99	96	0	0.372	0.381	0.38	0.413	1.373	0.373	0.969	120	578	21545	19113	-1.428	5838	15707	5276	13837	0
4	20	5	YJL094C	YJL094C	19760	14690	130	9182	8510	3245	50	55	37	100	100	0	13392	11678	5058	60	68	110	100	99	0	0.685	0.728	0.721	0.781	1.398	0.705	0.961	120	627	22464	20078	-0.546	9132	13332	8460	11618	0
4	21	5	NIT2	YJL126W	19970	14700	140	3886	3201	1379	49	54	50	98	96	0	14896	12009	5965	59	64	97	98	94	0	0.259	0.264	0.259	0.306	1.696	0.252	0.965	156	793	18674	15102	-1.951	3837	14837	3152	11950	0
4	1	6	YJL064W	YJL064W	15960	14950	140	2418	2093	1006	51	58	89	95	93	0	6790	5619	3121	60	89	520	90	83	0	0.352	0.367	0.363	0.443	1.901	0.344	0.946	156	788	9097	7601	-1.508	2367	6730	2042	5559	0
4	2	6	MRPL49	YJL096W	16170	14950	140	1191	1084	470	51	53	15	98	95	0	7628	6310	3173	60	63	49	94	94	0	0.151	0.165	0.166	0.192	1.724	0.156	0.951	156	629	8708	7283	-2.731	1140	7568	1033	6250	0
4	3	6	PBS2	YJL128C	16360	14950	140	2539	2159	1011	51	55	38	96	95	0	10045	8386	4206	61	72	110	93	92	0	0.249	0.253	0.256	0.289	1.66	0.244	0.969	156	662	12472	10433	-2.005	2488	9984	2108	8325	0
4	4	6	YKL054C	YKL054C	16570	14940	130	199	201	78	51	51	11	95	94	0	500	481	209	61	62	29	96	90	0	0.337	0.357	0.344	0.354	1.671	0.338	0.864	120	577	587	570	-1.569	148	439	150	420	0
4	5	6	YKL086W	YKL086W	16770	14940	140	2659	2479	1207	51	55	69	97	94	0	5721	5086	2658	60	66	98	93	93	0	0.461	0.483	0.496	0.544	1.6	0.468	0.96	156	633	8269	7454	-1.118	2608	5661	2428	5026	0
4	6	6	SBA1	YKL117W	16960	14940	130	3311	3078	1397	51	54	25	100	97	0	6118	5364	2502	61	73	119	95	94	0	0.538	0.571	0.581	0.613	1.453	0.56	0.969	120	554	9317	8330	-0.894	3260	6057	3027	5303	0
4	7	6	YKL056C	YKL056C	17160	14930	120	477	466	221	51	58	45	95	89	0	3418	3161	1799	62	114	351	90	84	0	0.127	0.134	0.136	0.155	1.875	0.127	0.941	120	531	3782	3514	-2.978	426	3356	415	3099	0
4	8	6	YKL088W	YKL088W	17360	14930	140	4216	3614	1807	51	55	35	98	96	0	12278	10227	5577	62	107	335	91	87	0	0.341	0.351	0.352	0.421	2.012	0.336	0.959	156	651	16381	13728	-1.552	4165	12216	3563	10165	0
4	9	6	VPH2	YKL119C	17570	14920	140	5918	5128	1955	50	51	12	100	100	0	5104	4359	1710	60	60	25	100	98	0	1.163	1.181	1.187	1.261	1.56	1.178	0.956	156	616	10912	9377	0.218	5868	5044	5078	4299	0
4	10	6	TOA2	YKL058W	17760	14930	130	4882	4185	1649	51	56	37	100	98	0	7209	6074	2539	60	71	86	96	95	0	0.676	0.687	0.687	0.749	1.747	0.674	0.96	120	540	11980	10148	-0.565	4831	7149	4134	6014	0
4	11	6	YKL090W	YKL090W	17960	14930	130	688	657	305	51	57	41	95	92	0	3117	2890	1413	61	71	84	95	93	0	0.208	0.214	0.217	0.22	1.449	0.208	0.947	120	609	3693	3435	-2.262	637	3056	606	2829	0
4	12	6	YKL121W	YKL121W	18170	14930	130	873	968	556	50	51	12	96	96	0	2541	2757	1689	61	63	40	95	95	0	0.332	0.341	0.343	0.358	1.427	0.328	0.942	120	576	3303	3614	-1.591	823	2480	918	2696	0
4	13	6	FBA1	YKL060C	18360	14920	130	7042	6278	2636	49	54	25	100	98	0	6261	5530	2486	61	70	81	95	95	0	1.128	1.139	1.142	1.192	1.473	1.127	0.959	120	561	13193	11698	0.174	6993	6200	6229	5469	0
4	14	6	BUD2	YKL092C	18560	14920	130	2946	2833	1169	51	57	37	99	97	0	5486	4959	2140	60	78	105	95	95	0	0.534	0.568	0.557	0.626	1.908	0.555	0.951	120	612	8321	7681	-0.906	2895	5426	2782	4899	0
4	15	6	YKL123W	YKL123W	18760	14910	130	2682	2371	1021	50	55	31	98	96	0	4955	4415	2228	61	82	121	94	94	0	0.538	0.533	0.525	0.59	1.781	0.507	0.954	120	627	7526	6675	-0.895	2632	4894	2321	4354	0
4	16	6	RIC1	YLR039C	18970	14910	130	1024	1025	446	50	54	28	98	96	0	3624	3519	1677	61	75	106	95	94	0	0.273	0.282	0.275	0.303	1.404	0.271	0.956	120	599	4537	4433	-1.871	974	3563	975	3458	0
4	17	6	RGR1	YLR071C	19160	14910	130	865	971	521	49	52	21	96	95	0	3106	3413	1948	60	61	36	95	95	0	0.268	0.275	0.273	0.274	1.423	0.262	0.942	120	589	3862	4275	-1.9	816	3046	922	3353	0
4	18	6	CDC45	YLR103C	19360	14910	130	2489	2323	1079	49	51	15	100	100	0	5655	4925	2413	59	65	90	95	94	0	0.436	0.467	0.469	0.497	1.463	0.452	0.96	120	596	8036	7140	-1.198	2440	5596	2274	4866	0
4	19	6	YLR041W	YLR041W	19560	14900	130	2569	2238	852	49	52	22	100	99	0	5055	4207	1806	59	63	38	97	97	0	0.504	0.528	0.522	0.564	1.41	0.501	0.948	120	615	7516	6337	-0.987	2520	4996	2189	4148	0
4	20	6	YLR073C	YLR073C	19760	14910	130	1125	997	430	50	64	149	92	86	0	5845	4925	2246	60	80	223	94	94	0	0.186	0.195	0.198	0.213	1.846	0.189	0.951	120	659	6860	5812	-2.428	1075	5785	947	4865	0
4	21	6	SEN2	YLR105C	19980	14890	130	5381	4646	1969	51	63	146	96	95	0	13347	10752	5245	60	77	217	94	93	0	0.401	0.43	0.423	0.482	1.621	0.408	0.941	120	687	18617	15287	-1.318	5330	13287	4595	10692	0
4	1	7	TRX1	YLR043C	15970	15150	140	2360	1977	940	51	52	11	98	98	0	4003	3135	1681	61	77	476	89	82	0	0.586	0.627	0.623	0.69	1.675	0.543	0.829	156	766	6251	5000	-0.772	2309	3942	1926	3074	0
4	2	7	RPL10	YLR075W	16170	15150	130	1549	1348	561	51	53	15	98	96	0	5479	4556	2139	62	66	63	95	95	0	0.277	0.289	0.286	0.339	1.981	0.273	0.955	120	546	6915	5791	-1.854	1498	5417	1297	4494	0
4	3	7	YLR107W	YLR107W	16360	15150	130	2235	1947	841	52	57	42	96	95	0	4343	3780	1805	63	94	370	91	90	0	0.51	0.51	0.504	0.537	1.398	0.479	0.929	120	552	6463	5612	-0.971	2183	4280	1895	3717	0
4	4	7	STU2	YLR045C	16580	15140	140	6984	6001	2628	52	62	96	99	98	0	14178	11546	5731	62	91	355	94	91	0	0.491	0.518	0.515	0.61	1.714	0.494	0.951	156	676	21048	17433	-1.026	6932	14116	5949	11484	0
4	5	7	YLR077W	YLR077W	16790	15140	130	8426	7279	3125	52	61	102	99	96	0	12084	10238	4520	61	71	152	97	96	0	0.696	0.71	0.721	0.78	1.65	0.704	0.962	120	520	20397	17404	-0.522	8374	12023	7227	10177	0
4	6	7	AHP1	YLR109W	16970	15130	140	2349	2063	939	51	53	16	99	98	0	5668	4556	2341	62	67	67	96	94	0	0.41	0.448	0.446	0.508	1.565	0.426	0.958	156	630	7904	6506	-1.287	2298	5606	2012	4494	0
4	7	7	YLR422W	YLR422W	17190	15130	130	1222	1199	510	50	54	22	98	97	0	2632	2496	1187	60	83	228	94	90	0	0.456	0.472	0.471	0.502	1.392	0.446	0.941	120	603	3744	3585	-1.134	1172	2572	1149	2436	0
4	8	7	YLR454W	YLR454W	17380	15130	130	955	1032	565	50	52	13	100	100	0	2147	2456	1442	59	66	122	95	94	0	0.433	0.41	0.413	0.438	1.469	0.391	0.936	120	543	2993	3379	-1.206	905	2088	982	2397	0
4	9	7	PPZ1	YML016C	17570	15130	140	7711	6977	3525	50	52	12	100	100	0	8033	6864	3898	60	75	361	91	87	0	0.961	1.018	1.02	1.251	1.831	0.975	0.948	156	600	15634	13731	-0.058	7661	7973	6927	6804	0
4	10	7	YLR424W	YLR424W	17770	15120	140	6681	6387	3392	51	58	47	100	100	0	12576	10431	5951	61	90	437	93	89	0	0.53	0.611	0.607	0.71	1.657	0.59	0.959	156	637	19145	16706	-0.917	6630	12515	6336	10370	0
4	11	7	YLR456W	YLR456W	17980	15120	130	4375	3697	1857	51	57	44	98	97	0	6287	5036	2642	62	77	280	92	88	0	0.695	0.733	0.75	0.807	1.446	0.719	0.948	120	560	10549	8620	-0.526	4324	6225	3646	4974	0
4	12	7	YML018C	YML018C	18180	15120	140	3346	2953	1322	50	52	12	99	99	0	7331	6256	2830	61	62	39	99	99	0	0.453	0.469	0.463	0.488	1.437	0.463	0.961	156	634	10566	9098	-1.141	3296	7270	2903	6195	0
4	13	7	YLR426W	YLR426W	18380	15110	130	2679	2355	931	49	51	14	99	98	0	12314	10071	4429	61	63	60	96	96	0	0.215	0.23	0.228	0.252	1.436	0.222	0.969	120	563	14883	12316	-2.22	2630	12253	2306	10010	0
4	14	7	YLR458W	YLR458W	18570	15120	130	3566	2959	1270	50	53	31	98	98	0	5842	4723	2302	60	71	92	95	95	0	0.608	0.624	0.613	0.687	1.373	0.591	0.963	120	596	9298	7572	-0.718	3516	5782	2909	4663	0
4	15	7	YML020W	YML020W	18770	15120	130	4836	4557	2147	52	65	80	97	95	0	11771	10688	5497	61	102	289	95	94	0	0.409	0.424	0.41	0.478	1.539	0.404	0.957	120	625	16494	15132	-1.291	4784	11710	4505	10627	0
4	16	7	YLR428C	YLR428C	18990	15100	130	2740	2321	925	50	60	75	97	97	0	7042	5739	2577	62	93	282	93	90	0	0.385	0.4	0.397	0.45	1.671	0.388	0.966	120	620	9670	7948	-1.376	2690	6980	2271	5677	0
4	17	7	YLR460C	YLR460C	19180	15100	130	6829	6142	2311	50	52	15	100	100	0	19389	16727	7010	61	63	88	97	95	0	0.351	0.366	0.358	0.437	2.093	0.354	0.968	120	595	26107	22758	-1.512	6779	19328	6092	16666	0
4	18	7	APT1	YML022W	19380	15100	130	2097	1804	697	49	51	11	99	99	0	6268	5187	2279	59	61	86	95	94	0	0.33	0.342	0.341	0.387	1.742	0.328	0.956	120	583	8257	6883	-1.6	2048	6209	1755	5128	0
4	19	7	HSC82	YMR186W	19570	15100	120	733	737	397	49	50	14	99	96	0	1595	1545	911	58	58	26	94	92	0	0.445	0.463	0.459	0.512	1.638	0.445	0.959	120	530	2221	2175	-1.168	684	1537	688	1487	0
4	20	7	GUA1	YMR217W	19770	15100	120	1418	1513	912	49	51	20	98	96	0	3844	3704	2396	59	66	88	93	90	0	0.362	0.402	0.397	0.46	1.837	0.387	0.959	120	542	5154	5109	-1.467	1369	3785	1464	3645	0
4	21	7	YMR250W	YMR250W	19980	15100	140	442	518	382	50	59	129	78	61	0	999	1210	988	59	78	206	80	73	0	0.417	0.407	0.422	0.497	2.176	0.387	0.937	156	804	1332	1619	-1.262	392	940	468	1151	0
4	1	8	YMR188C	YMR188C	15980	15350	130	1455	1405	656	51	52	11	98	98	0	2747	2477	1259	62	60	18	97	96	0	0.523	0.561	0.564	0.587	1.355	0.537	0.937	120	656	4089	3769	-0.935	1404	2685	1354	2415	0
4	2	8	ESC1	YMR219W	16190	15340	130	146	157	67	50	52	12	96	93	0	285	296	147	62	63	41	91	90	0	0.43	0.457	0.458	0.457	1.835	0.421	0.833	120	565	319	341	-1.216	96	223	107	234	0
4	3	8	HOR7	YMR251W-A	16390	15340	140	2107	2014	1040	50	52	14	100	99	0	4271	3673	1970	63	78	333	92	87	0	0.489	0.544	0.558	0.619	1.747	0.531	0.935	156	615	6265	5574	-1.033	2057	4208	1964	3610	0
4	4	8	SGS1	YMR190C	16590	15330	130	1275	1168	526	50	51	12	98	98	0	1557	1451	697	62	68	138	90	90	0	0.819	0.805	0.822	0.865	1.549	0.765	0.909	120	559	2720	2507	-0.287	1225	1495	1118	1389	0
4	5	8	YMR221C	YMR221C	16790	15330	130	562	630	428	51	54	63	90	85	0	1097	1239	895	61	71	147	86	85	0	0.493	0.492	0.488	0.539	1.783	0.468	0.917	120	593	1547	1757	-1.02	511	1036	579	1178	0
4	6	8	YMR253C	YMR253C	16990	15330	130	419	404	179	50	51	12	98	95	0	1341	1262	652	62	64	54	93	92	0	0.289	0.295	0.299	0.317	1.545	0.278	0.932	120	577	1648	1554	-1.793	369	1279	354	1200	0
4	7	8	YMR192W	YMR192W	17190	15330	130	406	421	216	49	52	14	98	95	0	1679	1725	929	61	60	34	94	92	0	0.221	0.224	0.222	0.249	2.089	0.212	0.895	120	578	1975	2036	-2.18	357	1618	372	1664	0
4	8	8	UBP8	YMR223W	17380	15330	130	3028	2930	1611	51	52	11	100	100	0	3965	3867	2296	59	59	25	96	96	0	0.762	0.756	0.762	0.831	1.421	0.733	0.962	120	595	6883	6687	-0.392	2977	3906	2879	3808	0
4	9	8	GFD1	YMR255W	17590	15330	140	3014	2503	1266	51	53	22	98	98	0	6443	5378	2901	60	76	357	91	87	0	0.464	0.461	0.46	0.519	1.639	0.443	0.944	156	619	9346	7770	-1.107	2963	6383	2452	5318	0
4	10	8	LAP3	YNL239W	17790	15330	130	2930	2437	1181	50	52	24	100	98	0	10249	8372	4441	62	92	473	93	90	0	0.283	0.287	0.285	0.323	1.583	0.275	0.955	120	540	13067	10697	-1.823	2880	10187	2387	8310	0
4	11	8	BNI1	YNL271C	17990	15320	140	556	687	473	51	54	33	96	94	0	1574	1782	1265	62	78	269	88	84	0	0.334	0.37	0.369	0.407	1.724	0.362	0.935	156	640	2017	2356	-1.582	505	1512	636	1720	0
4	12	8	YNL303W	YNL303W	18180	15320	120	1168	1064	546	50	52	21	95	95	0	2998	2759	1569	60	64	63	93	90	0	0.381	0.376	0.376	0.422	1.933	0.36	0.961	120	523	4056	3713	-1.394	1118	2938	1014	2699	0
4	13	8	ZWF1	YNL241C	18390	15310	130	4178	3553	1526	51	52	20	100	100	0	7528	6151	2852	60	59	20	98	98	0	0.553	0.575	0.572	0.633	1.663	0.561	0.968	120	612	11595	9593	-0.856	4127	7468	3502	6091	0
4	14	8	TOF1	YNL273W	18580	15320	130	1754	1716	858	51	52	13	99	97	0	2957	2819	1448	60	62	52	95	95	0	0.588	0.603	0.604	0.63	1.731	0.594	0.938	120	582	4600	4424	-0.766	1703	2897	1665	2759	0
4	15	8	YNL305C	YNL305C	18790	15310	140	2788	2310	1048	50	56	51	98	96	0	8873	7064	3396	59	83	264	94	92	0	0.311	0.323	0.322	0.349	1.669	0.314	0.964	156	637	11552	9265	-1.687	2738	8814	2260	7005	0
4	16	8	SLA2	YNL243W	18980	15310	130	3675	3142	1511	50	55	55	95	95	0	12589	9977	5281	61	67	74	95	94	0	0.289	0.312	0.307	0.362	1.728	0.3	0.967	120	577	16153	13008	-1.789	3625	12528	3092	9916	0
4	17	8	YNL275W	YNL275W	19180	15310	130	8358	6944	3087	51	55	23	99	98	0	10865	8764	4323	62	68	51	96	96	0	0.769	0.792	0.778	0.902	1.742	0.768	0.966	120	644	19110	15595	-0.379	8307	10803	6893	8702	0
4	18	8	MCK1	YNL307C	19390	15300	130	3477	2945	1195	51	58	51	100	98	0	8860	7204	3295	61	72	181	97	96	0	0.389	0.405	0.404	0.44	1.462	0.387	0.963	120	612	12225	10037	-1.361	3426	8799	2894	7143	0
4	19	8	YNL245C	YNL245C	19590	15290	130	2122	1809	851	50	57	55	97	94	0	7349	5776	3061	60	75	194	93	92	0	0.284	0.308	0.308	0.359	1.745	0.294	0.95	120	582	9361	7475	-1.815	2072	7289	1759	5716	0
4	20	8	MET2	YNL277W	19770	15300	130	1541	1349	661	50	54	32	97	96	0	11810	9349	4860	60	81	147	96	95	0	0.127	0.14	0.134	0.156	1.74	0.134	0.923	120	583	13241	10588	-2.978	1491	11750	1299	9289	0
4	21	8	STB1	YNL309W	19980	15290	130	4581	3932	1562	49	52	23	100	100	0	14947	12368	5448	60	86	223	95	95	0	0.304	0.315	0.316	0.343	1.497	0.301	0.958	120	690	19419	16191	-1.716	4532	14887	3883	12308	0
4	1	9	YOR041C	YOR041C	15980	15540	140	2615	2358	925	50	53	32	100	100	0	4368	3866	1571	61	69	130	99	96	0	0.596	0.607	0.606	0.625	1.342	0.594	0.958	156	772	6872	6113	-0.748	2565	4307	2308	3805	0
4	2	9	YOR073W	YOR073W	16180	15540	140	3861	3703	1640	50	52	20	100	100	0	5599	4888	2205	62	70	129	99	95	0	0.688	0.757	0.757	0.803	1.414	0.746	0.95	156	585	9348	8479	-0.539	3811	5537	3653	4826	0
4	3	9	YOR105W	YOR105W	16370	15540	140	711	642	216	50	55	50	99	97	0	4454	3915	1451	62	67	97	98	98	0	0.151	0.154	0.153	0.163	1.488	0.147	0.93	156	601	5053	4445	-2.732	661	4392	592	3853	0
4	4	9	WHI2	YOR043W	16580	15530	130	3836	3469	1727	50	55	50	100	98	0	7577	6706	3416	63	67	95	96	95	0	0.504	0.515	0.519	0.572	1.634	0.503	0.953	120	624	11300	10062	-0.989	3786	7514	3419	6643	0
4	5	9	UFE1	YOR075W	16780	15530	130	7690	6715	2957	50	52	16	100	100	0	7950	6722	3057	61	63	59	97	95	0	0.968	1.001	0.99	1.113	1.588	0.988	0.953	120	595	15529	13326	-0.046	7640	7889	6665	6661	0
4	6	9	YOR107W	YOR107W	16980	15530	140	1216	1087	518	51	52	12	99	99	0	5354	4470	2393	61	63	56	96	96	0	0.22	0.235	0.234	0.268	1.713	0.224	0.953	156	650	6458	5445	-2.184	1165	5293	1036	4409	0
4	7	9	TOM6	YOR045W	17180	15530	140	1122	1026	503	50	52	17	97	97	0	1976	1720	858	62	64	58	95	94	0	0.56	0.589	0.592	0.63	1.564	0.578	0.943	156	652	2986	2634	-0.836	1072	1914	976	1658	0
4	8	9	RTS2	YOR077W	17390	15530	130	1085	945	458	51	53	18	98	97	0	5662	4720	2446	60	64	81	95	94	0	0.185	0.192	0.192	0.22	1.804	0.187	0.953	120	597	6636	5554	-2.438	1034	5602	894	4660	0
4	9	9	INP53	YOR109W	17580	15520	130	1769	1626	832	50	51	11	99	99	0	5043	4493	2401	60	64	84	95	94	0	0.345	0.356	0.356	0.405	1.726	0.34	0.95	120	559	6702	6009	-1.535	1719	4983	1576	4433	0
4	10	9	STD1	YOR047C	17780	15520	140	8407	7203	3934	50	51	12	100	100	0	10375	8605	4832	61	66	78	96	95	0	0.81	0.837	0.842	0.93	1.637	0.827	0.961	156	638	18671	15697	-0.304	8357	10314	7153	8544	0
4	11	9	ATX2	YOR079C	17980	15520	130	4304	3843	1820	50	51	14	98	97	0	7865	6699	3356	61	71	105	95	92	0	0.545	0.571	0.565	0.628	1.581	0.55	0.958	120	585	12058	10431	-0.875	4254	7804	3793	6638	0
4	12	9	YOR111W	YOR111W	18180	15520	130	2332	1963	939	50	52	15	99	99	0	5501	4638	2442	61	71	102	95	95	0	0.419	0.418	0.415	0.479	1.803	0.4	0.951	120	614	7722	6490	-1.253	2282	5440	1913	4577	0
4	13	9	YPL030W	YPL030W	18380	15510	130	1459	1485	827	50	52	20	98	95	0	4867	4827	2889	62	62	46	95	94	0	0.293	0.301	0.296	0.342	1.727	0.289	0.958	120	632	6214	6200	-1.77	1409	4805	1435	4765	0
4	14	9	YPL062W	YPL062W	18590	15510	130	784	724	318	50	51	13	98	98	0	3733	3338	1642	61	63	52	95	94	0	0.2	0.206	0.21	0.237	1.703	0.196	0.944	120	595	4406	3951	-2.323	734	3672	674	3277	0
4	15	9	SEC62	YPL094C	18790	15510	140	1833	1578	661	50	52	16	100	98	0	8416	6996	3205	60	62	50	98	98	0	0.213	0.22	0.222	0.237	1.49	0.213	0.956	156	650	10139	8464	-2.229	1783	8356	1528	6936	0
4	16	9	SVL3	YPL032C	18990	15500	130	3933	3705	1791	50	53	16	100	99	0	9799	9002	4596	60	60	28	96	95	0	0.399	0.409	0.403	0.473	1.776	0.398	0.963	120	580	13622	12597	-1.327	3883	9739	3655	8942	0
4	17	9	YPL064C	YPL064C	19180	15510	130	1991	1955	1078	50	52	13	100	98	0	5559	5246	3157	60	60	25	96	95	0	0.353	0.367	0.365	0.408	1.464	0.35	0.964	120	567	7440	7091	-1.502	1941	5499	1905	5186	0
4	18	9	YPL096W	YPL096W	19380	15500	140	4017	3325	1642	51	53	20	100	100	0	13926	11129	6215	60	62	38	99	98	0	0.286	0.296	0.294	0.336	1.561	0.281	0.963	156	641	17832	14343	-1.806	3966	13866	3274	11069	0
4	19	9	YPL034W	YPL034W	19570	15500	130	3723	3014	1452	51	60	59	100	98	0	6341	4903	2707	61	86	206	95	94	0	0.585	0.612	0.591	0.685	1.501	0.575	0.957	120	645	9952	7805	-0.774	3672	6280	2963	4842	0
4	20	9	YPL066W	YPL066W	19790	15490	130	3737	3437	1528	50	75	112	99	96	0	13316	11678	5487	62	129	313	97	95	0	0.278	0.292	0.288	0.31	1.356	0.283	0.959	120	646	16941	15003	-1.846	3687	13254	3387	11616	0
4	21	9	YPL098C	YPL098C	19990	15500	130	1865	1582	773	49	65	99	92	90	0	8174	6794	3638	61	117	371	90	89	0	0.224	0.228	0.23	0.265	1.709	0.218	0.952	120	696	9929	8266	-2.159	1816	8113	1533	6733	0
4	1	10	PMA2	YPL036W	15980	15750	130	1790	1704	904	51	54	34	96	95	0	4461	4003	2343	62	73	140	91	90	0	0.395	0.419	0.416	0.47	1.703	0.399	0.935	120	677	6138	5594	-1.339	1739	4399	1653	3941	0
4	2	10	YPL068C	YPL068C	16190	15740	140	3813	3432	1694	51	54	35	100	100	0	7008	6122	3135	62	73	146	97	94	0	0.542	0.558	0.563	0.611	1.654	0.546	0.964	156	621	10708	9441	-0.885	3762	6946	3381	6060	0
4	3	10	YPL100W	YPL100W	16380	15740	130	415	588	440	50	51	10	99	96	0	885	1226	1005	60	63	88	90	87	0	0.442	0.461	0.456	0.519	1.676	0.436	0.952	120	557	1190	1704	-1.176	365	825	538	1166	0
4	4	10	NAT3	YPR131C	16590	15740	130	1198	1116	533	49	52	20	97	97	0	2411	2189	1094	61	65	85	91	90	0	0.489	0.501	0.485	0.554	1.769	0.486	0.95	120	614	3499	3195	-1.032	1149	2350	1067	2128	0
4	5	10	TIF3	YPR163C	16780	15730	130	1202	1027	529	51	53	16	96	96	0	4174	3406	2018	61	62	29	93	92	0	0.28	0.292	0.286	0.329	1.817	0.275	0.952	120	629	5264	4321	-1.837	1151	4113	976	3345	0
4	6	10	YPR195C	YPR195C	17000	15730	130	265	256	119	51	53	13	97	91	0	633	578	307	61	64	60	92	86	0	0.374	0.397	0.398	0.413	1.595	0.371	0.901	120	571	786	722	-1.418	214	572	205	517	0
4	7	10	YPR133C	YPR133C	17180	15730	130	371	371	183	50	53	22	90	88	0	1240	1249	701	61	64	60	87	87	0	0.272	0.27	0.269	0.282	1.704	0.256	0.93	120	585	1500	1509	-1.877	321	1179	321	1188	0
4	8	10	RHO1	YPR165W	17400	15730	130	4326	3654	1719	51	54	22	99	99	0	7344	6244	3011	60	63	77	92	91	0	0.587	0.583	0.579	0.672	1.966	0.583	0.969	120	612	11559	9787	-0.769	4275	7284	3603	6184	0
4	9	10	YPR197C	YPR197C	17590	15730	130	2532	2412	1198	50	52	13	99	98	0	4051	3650	1774	60	64	79	91	90	0	0.622	0.658	0.659	0.702	1.475	0.647	0.964	120	608	6473	5952	-0.685	2482	3991	2362	3590	0
4	10	10	CTF4	YPR135W	17800	15720	120	98	204	219	50	51	11	88	76	0	165	396	528	59	66	108	45	26	0	0.453	0.457	0.476	0.487	2.266	0.369	0.808	120	561	154	491	-1.143	48	106	154	337	0
4	11	10	MET16	YPR167C	18000	15710	110	87	224	268	50	51	11	82	63	0	118	491	739	61	72	138	33	28	0	0.649	0.405	0.419	0.531	2.655	0.349	0.87	80	499	94	604	-0.623	37	57	174	430	0
4	12	10	ARR1	YPR199C	18190	15720	130	61	64	17	49	50	11	50	29	0	115	107	38	62	68	96	5	0	0	0.226	0.333	0.307	0.313	2.925	0.02	0.018	120	622	65	60	-2.143	12	53	15	45	0
4	13	10	RRP9	YPR137W	18400	15710	130	110	243	317	50	50	12	91	86	0	177	479	787	61	82	330	20	15	0	0.517	0.462	0.541	0.528	1.875	0.239	0.514	120	615	176	611	-0.951	60	116	193	418	0
4	14	10	YPR169W	YPR169W	18590	15710	130	7067	5951	2772	49	50	14	100	100	0	11856	9569	4843	62	78	316	90	90	0	0.595	0.621	0.618	0.716	1.624	0.598	0.971	120	628	18812	15409	-0.749	7018	11794	5902	9507	0
4	15	10	ARR3	YPR201W	18810	15710	130	102	104	39	50	51	14	84	73	0	171	162	66	60	61	30	81	75	0	0.468	0.529	0.496	0.47	1.966	0.453	0.652	120	609	163	156	-1.094	52	111	54	102	0
4	16	10	CEN1	CEN1	19000	15710	130	163	161	58	50	51	14	94	91	0	354	332	140	60	58	21	92	92	0	0.384	0.408	0.4	0.412	1.625	0.381	0.843	120	613	407	383	-1.379	113	294	111	272	0
4	17	10	YBL091C-A	YBL091C-A	19210	15700	130	1361	1190	460	50	51	13	100	100	0	5280	4509	1856	59	58	19	100	100	0	0.251	0.256	0.259	0.264	1.322	0.248	0.961	120	590	6532	5590	-1.994	1311	5221	1140	4450	0
4	18	10	YBLWdelta8	YBLWdelta8	19400	15700	130	1191	1085	493	50	51	11	100	100	0	1218	1112	547	59	61	43	94	92	0	0.984	0.983	0.998	1.042	1.355	0.927	0.941	120	600	2300	2088	-0.023	1141	1159	1035	1053	0
4	19	10	YCRCtau1	YCRCtau1	19600	15700	110	199	235	153	49	51	13	93	88	0	391	501	400	60	67	82	85	73	0	0.453	0.422	0.444	0.461	1.808	0.315	0.709	80	514	481	627	-1.142	150	331	186	441	0
4	20	10	SNR189	SNR189	19810	15700	130	158	154	51	49	70	111	47	0	0	1039	921	402	62	113	297	85	76	0	0.112	0.122	0.124	0.131	1.862	0.168	0.5	120	635	1086	964	-3.164	109	977	105	859	0
4	21	10	YCRWomega3	YCRWomega3	20000	15690	130	2983	2561	1105	49	58	73	98	96	0	3682	3039	1390	61	79	181	93	91	0	0.81	0.844	0.844	0.903	1.349	0.826	0.968	120	656	6555	5490	-0.304	2934	3621	2512	2978	0
4	1	11	IntYDR064W	IntYDR064W	16000	15940	130	924	869	391	50	52	14	99	97	0	3275	2820	1444	61	61	31	96	95	0	0.272	0.297	0.289	0.334	1.928	0.279	0.937	120	662	4088	3578	-1.879	874	3214	819	2759	0
4	2	11	YDRWsigma4	YDRWsigma4	16200	15940	130	228	221	73	49	51	10	99	98	0	491	439	178	60	58	18	92	91	0	0.415	0.454	0.456	0.498	1.942	0.421	0.897	120	561	610	551	-1.268	179	431	172	379	0
4	3	11	tG(CCC)D	tG(CCC)D	16400	15940	140	121	118	36	49	50	10	94	90	0	275	253	99	60	58	18	91	89	0	0.335	0.358	0.348	0.37	1.909	0.32	0.739	156	640	287	262	-1.578	72	215	69	193	0
4	4	11	YERWdelta12	YERWdelta12	16600	15930	130	478	430	173	49	50	11	96	93	0	1992	1740	786	61	60	19	92	92	0	0.222	0.227	0.221	0.239	1.592	0.214	0.938	120	580	2360	2060	-2.17	429	1931	381	1679	0
4	5	11	IntYER133W	IntYER133W	16800	15930	130	655	638	265	49	51	13	100	99	0	3636	3124	1326	61	63	39	100	100	0	0.17	0.192	0.186	0.2	1.467	0.181	0.918	120	594	4181	3652	-2.561	606	3575	589	3063	0
4	6	11	YERCdelta26	YERCdelta26	17010	15930	140	736	720	343	49	51	13	100	100	0	2072	1888	876	60	61	37	99	97	0	0.341	0.367	0.364	0.387	1.572	0.358	0.926	156	637	2699	2499	-1.55	687	2012	671	1828	0
4	7	11	iYAR044W-2	iYAR044W-2	17210	15930	130	301	336	190	50	52	18	96	94	0	581	670	427	60	59	20	95	92	0	0.482	0.469	0.476	0.49	1.567	0.442	0.926	120	580	772	896	-1.054	251	521	286	610	0
4	8	11	iYAR050W	iYAR050W	17410	15920	130	909	814	311	50	53	19	100	100	0	1148	1031	421	61	60	27	97	93	0	0.79	0.788	0.795	0.888	1.725	0.761	0.945	120	579	1946	1734	-0.34	859	1087	764	970	0
4	9	11	iYARCdelta8-2	iYARCdelta8-2	17610	15930	140	158	172	100	50	51	12	94	88	0	281	298	187	61	58	18	90	87	0	0.491	0.515	0.542	0.552	2.128	0.292	0.469	156	613	328	359	-1.026	108	220	122	237	0
4	10	11	iYBLWdelta3	iYBLWdelta3	17810	15920	140	250	264	144	50	51	11	95	94	0	391	420	230	60	68	130	81	67	0	0.604	0.594	0.594	0.61	1.699	0.048	0.068	156	620	531	574	-0.727	200	331	214	360	0
4	11	11	iYBL105C	iYBL105C	18010	15920	130	2553	2393	1018	49	50	11	100	100	0	6352	5707	2464	60	63	87	99	98	0	0.398	0.415	0.426	0.44	1.305	0.404	0.967	120	592	8796	7991	-1.329	2504	6292	2344	5647	0
4	12	11	iYBL101C	iYBL101C	18200	15910	130	2342	2101	897	49	51	19	100	100	0	8578	7320	3333	63	68	97	95	92	0	0.269	0.283	0.285	0.328	1.682	0.273	0.96	120	568	10808	9309	-1.893	2293	8515	2052	7257	0
4	13	11	iYBL085W	iYBL085W	18390	15910	130	3715	3457	1615	50	52	21	100	100	0	2047	1814	894	61	83	328	88	84	0	1.845	1.944	1.951	2.095	1.459	1.868	0.825	120	627	5651	5160	0.884	3665	1986	3407	1753	0
4	14	11	iYBL080C	iYBL080C	18610	15910	120	275	303	183	49	52	25	93	86	0	1997	1883	1175	60	63	73	99	97	0	0.117	0.139	0.134	0.131	1.563	0.141	0.926	120	590	2163	2077	-3.099	226	1937	254	1823	0
4	15	11	iYBL075C	iYBL075C	18810	15910	120	1992	1707	771	49	51	12	99	99	0	5408	4504	2120	60	62	69	100	98	0	0.363	0.373	0.374	0.381	1.319	0.366	0.972	120	558	7291	6102	-1.461	1943	5348	1658	4444	0
4	16	11	iYBL056W	iYBL056W	19010	15900	130	1039	1021	468	48	50	11	99	99	0	1810	1808	843	60	66	102	95	93	0	0.566	0.557	0.563	0.581	1.451	0.54	0.938	120	600	2741	2721	-0.82	991	1750	973	1748	0
4	17	11	iYBL051C	iYBL051C	19210	15900	130	1141	1044	380	49	51	12	100	99	0	3931	3454	1275	59	58	21	100	100	0	0.282	0.293	0.296	0.301	1.309	0.286	0.963	120	630	4964	4390	-1.826	1092	3872	995	3395	0
4	18	11	iYBL046W	iYBL046W	19420	15900	130	531	498	221	49	51	13	100	99	0	1722	1608	709	58	62	79	99	95	0	0.29	0.29	0.293	0.294	1.393	0.284	0.942	120	633	2146	1999	-1.788	482	1664	449	1550	0
4	19	11	iYBR250W	iYBR250W	19620	15890	130	1174	1184	575	48	53	41	97	95	0	3069	3156	1649	60	69	115	94	91	0	0.374	0.367	0.367	0.395	1.427	0.352	0.958	120	639	4135	4232	-1.418	1126	3009	1136	3096	0
4	20	11	iYBR254C	iYBR254C	19820	15890	130	1386	1256	601	47	53	42	98	95	0	2924	2525	1209	61	70	111	95	91	0	0.468	0.491	0.493	0.528	1.563	0.482	0.964	120	614	4202	3673	-1.096	1339	2863	1209	2464	0
4	21	11	iYBR259W	iYBR259W	20020	15890	120	555	518	241	48	50	12	100	100	0	1031	929	500	59	57	22	95	95	0	0.522	0.54	0.535	0.549	1.356	0.332	0.774	120	582	1479	1340	-0.939	507	972	470	870	0
4	1	12	iYBR279W	iYBR279W	16010	16140	140	1830	1595	775	50	51	13	100	98	0	2291	1947	937	62	61	27	98	96	0	0.799	0.82	0.815	0.869	1.642	0.814	0.943	156	800	4009	3430	-0.325	1780	2229	1545	1885	0
4	2	12	iYBR283C	iYBR283C	16210	16130	130	481	480	196	50	51	11	100	100	0	3791	3537	1437	61	60	27	100	99	0	0.116	0.124	0.12	0.128	1.588	0.115	0.887	120	591	4161	3906	-3.113	431	3730	430	3476	0
4	3	12	iYBR287W	iYBR287W	16410	16130	130	1003	882	319	50	51	12	100	99	0	899	802	293	62	61	27	96	95	0	1.139	1.124	1.119	1.125	1.369	1.111	0.941	120	592	1790	1572	0.187	953	837	832	740	0
4	4	12	iYCL075W	iYCL075W	16610	16130	130	1151	1046	467	50	51	12	100	98	0	3677	3146	1500	62	61	19	96	95	0	0.305	0.323	0.321	0.35	1.555	0.31	0.944	120	595	4716	4080	-1.715	1101	3615	996	3084	0
4	5	12	iYCL073C	iYCL073C	16810	16130	140	3437	3284	1477	49	55	46	100	99	0	5721	5239	2403	60	63	40	99	99	0	0.598	0.625	0.627	0.656	1.48	0.616	0.963	156	653	9049	8414	-0.741	3388	5661	3235	5179	0
4	6	12	iYCL065W-0	iYCL065W-0	17000	16120	130	1541	1497	702	50	69	150	95	90	0	1982	1854	815	59	64	58	98	97	0	0.775	0.806	0.803	0.821	1.345	0.806	0.938	120	556	3414	3242	-0.367	1491	1923	1447	1795	0
4	7	12	iYCL047C	iYCL047C	17200	16120	130	3365	2834	1176	50	64	138	98	91	0	2074	1792	742	60	61	43	96	95	0	1.646	1.607	1.626	1.682	1.443	1.633	0.964	120	595	5329	4516	0.719	3315	2014	2784	1732	0
4	8	12	iYCL038C	iYCL038C	17390	16120	130	887	843	397	50	53	20	100	100	0	1080	991	426	61	59	20	98	96	0	0.821	0.853	0.866	0.875	1.383	0.872	0.94	120	609	1856	1723	-0.284	837	1019	793	930	0
4	9	12	iYCL033C	iYCL033C	17590	16120	130	2407	2159	807	50	52	14	99	99	0	2974	2615	1017	62	59	19	98	96	0	0.809	0.826	0.82	0.845	1.252	0.81	0.963	120	562	5269	4662	-0.305	2357	2912	2109	2553	0
4	10	12	iYDL054C	iYDL054C	17790	16120	140	2497	2054	942	50	51	12	100	99	0	6009	4832	2404	60	58	18	99	99	0	0.411	0.42	0.422	0.466	1.517	0.408	0.964	156	595	8396	6776	-1.282	2447	5949	2004	4772	0
4	11	12	iYDL049C	iYDL049C	17990	16110	130	1083	992	341	49	50	12	100	100	0	5224	4660	1779	59	58	21	99	99	0	0.2	0.205	0.204	0.228	1.615	0.198	0.952	120	570	6199	5544	-2.321	1034	5165	943	4601	0
4	12	12	iYDL046W	iYDL046W	18180	16110	130	1541	1342	560	49	53	29	99	96	0	5746	4851	2189	61	68	115	94	93	0	0.262	0.27	0.267	0.31	1.686	0.263	0.968	120	623	7177	6083	-1.93	1492	5685	1293	4790	0
4	13	12	iYDL028C	iYDL028C	18390	16110	130	1119	996	409	50	52	26	99	95	0	4376	3650	1688	60	66	108	95	93	0	0.248	0.264	0.263	0.305	1.679	0.253	0.963	120	613	5385	4536	-2.013	1069	4316	946	3590	0
4	14	12	itA(AGC)D	itA(AGC)D	18580	16110	130	1120	1020	401	50	56	45	97	95	0	5416	4768	2076	60	80	225	95	93	0	0.2	0.206	0.209	0.223	1.536	0.2	0.961	120	614	6426	5678	-2.324	1070	5356	970	4708	0
4	15	12	iYDL019C	iYDL019C	18800	16110	130	1310	1182	493	50	59	65	95	94	0	6060	5178	2311	63	86	232	94	91	0	0.21	0.221	0.221	0.241	1.458	0.216	0.955	120	630	7257	6247	-2.251	1260	5997	1132	5115	0
4	16	12	iYDL005C	iYDL005C	18990	16100	130	2477	2245	741	49	52	14	100	100	0	8310	7254	2596	62	74	121	96	95	0	0.294	0.305	0.301	0.332	1.463	0.297	0.963	120	599	10676	9388	-1.764	2428	8248	2196	7192	0
4	17	12	iYDL001W	iYDL001W	19190	16100	130	5891	5216	2072	49	53	39	100	99	0	3048	2770	1248	62	69	94	91	91	0	1.956	1.908	1.94	2.066	1.466	1.924	0.926	120	629	8828	7875	0.968	5842	2986	5167	2708	0
4	18	12	iYDR003W	iYDR003W	19400	16100	130	2502	2217	959	49	53	40	97	95	0	3334	2889	1326	61	64	76	95	91	0	0.749	0.767	0.768	0.835	1.435	0.75	0.955	120	631	5726	4996	-0.416	2453	3273	2168	2828	0
4	19	12	iYDR020C	iYDR020C	19600	16100	130	1364	1223	477	49	50	15	100	100	0	3809	3379	1391	60	62	76	99	96	0	0.351	0.354	0.353	0.37	1.292	0.343	0.957	120	630	5064	4493	-1.511	1315	3749	1174	3319	0
4	20	12	iYDR023W	iYDR023W	19800	16100	130	401	416	169	47	51	38	96	94	0	1339	1293	572	61	67	101	95	92	0	0.277	0.3	0.302	0.315	1.475	0.289	0.93	120	615	1632	1601	-1.852	354	1278	369	1232	0
4	21	12	iYDR028C	iYDR028C	20000	16090	120	373	443	253	49	50	12	100	99	0	1229	1404	812	59	60	38	97	95	0	0.277	0.293	0.287	0.3	1.494	0.293	0.949	120	617	1494	1739	-1.852	324	1170	394	1345	0
4	1	13	iYDR322W	iYDR322W	15990	16350	130	869	738	323	50	51	11	97	96	0	3704	3018	1486	63	61	19	94	93	0	0.225	0.233	0.232	0.26	1.668	0.221	0.956	120	676	4460	3643	-2.152	819	3641	688	2955	0
4	2	13	iYDR326C	iYDR326C	16200	16340	130	208	207	61	50	51	12	98	96	0	2304	2024	721	63	61	21	100	100	0	0.071	0.08	0.081	0.085	1.529	0.076	0.887	120	626	2399	2118	-3.826	158	2241	157	1961	0
4	3	13	iYDR331W	iYDR331W	16400	16340	130	174	166	58	51	55	41	87	70	0	571	518	208	62	66	102	89	86	0	0.242	0.252	0.243	0.259	1.966	0.236	0.785	120	646	632	571	-2.049	123	509	115	456	0
4	4	13	iYDR345C-0	iYDR345C-0	16610	16330	130	1926	1674	742	50	55	42	100	98	0	4832	4072	1826	63	68	106	96	95	0	0.393	0.405	0.412	0.442	1.628	0.398	0.961	120	628	6645	5633	-1.346	1876	4769	1624	4009	0
4	5	13	iYDR348C	iYDR348C	16810	16330	130	1585	1366	576	50	52	15	98	97	0	6467	5392	2504	62	64	55	94	93	0	0.24	0.247	0.247	0.263	1.732	0.238	0.963	120	595	7940	6646	-2.061	1535	6405	1316	5330	0
4	6	13	iYDR350C	iYDR350C	17010	16330	130	795	706	310	51	56	36	97	91	0	4891	4221	1981	63	68	62	98	93	0	0.154	0.158	0.157	0.171	1.566	0.152	0.952	120	658	5572	4813	-2.698	744	4828	655	4158	0
4	7	13	iYDR367W	iYDR367W	17230	16330	130	775	660	382	50	56	40	94	90	0	1720	1448	882	62	68	68	92	90	0	0.437	0.44	0.439	0.464	1.542	0.433	0.951	120	610	2383	1996	-1.193	725	1658	610	1386	0
4	8	13	iYDR371W	iYDR371W	17410	16330	130	1016	874	386	50	52	18	98	95	0	1276	1124	495	62	63	58	95	91	0	0.796	0.776	0.772	0.771	1.288	0.772	0.961	120	583	2180	1886	-0.33	966	1214	824	1062	0
4	9	13	iYDR375C	iYDR375C	17610	16320	130	377	348	135	50	52	14	96	92	0	2780	2311	1084	61	59	19	92	92	0	0.12	0.132	0.133	0.159	2.342	0.125	0.924	120	575	3046	2548	-3.056	327	2719	298	2250	0
4	10	13	itG(CCC)D	itG(CCC)D	17810	16320	140	919	794	357	50	52	26	98	95	0	3106	2469	1258	60	59	19	95	94	0	0.285	0.309	0.311	0.364	1.886	0.296	0.954	156	640	3915	3153	-1.809	869	3046	744	2409	0
4	11	13	iYDR394W	iYDR394W	18010	16320	120	1912	1751	744	48	50	13	100	100	0	3181	2872	1385	60	59	26	98	96	0	0.597	0.606	0.603	0.688	1.588	0.579	0.967	120	557	4985	4515	-0.744	1864	3121	1703	2812	0
4	12	13	iYDR399W	iYDR399W	18210	16320	130	889	781	334	49	51	24	96	95	0	2410	1996	945	60	65	109	91	90	0	0.357	0.378	0.373	0.409	1.459	0.366	0.956	120	599	3190	2668	-1.484	840	2350	732	1936	0
4	13	13	iYER056C-A	iYER056C-A	18400	16310	130	899	783	337	49	50	12	99	98	0	3763	3150	1475	60	59	28	98	97	0	0.23	0.238	0.237	0.26	1.445	0.228	0.952	120	598	4553	3824	-2.123	850	3703	734	3090	0
4	14	13	iYER060W	iYER060W	18610	16310	140	3433	2959	1324	51	65	109	95	93	0	9679	8010	4032	62	100	372	91	89	0	0.352	0.366	0.365	0.429	1.754	0.348	0.96	156	677	12999	10856	-1.508	3382	9617	2908	7948	0
4	15	13	iYER063W	iYER063W	18820	16310	130	2628	2226	1044	51	70	116	95	92	0	10626	8830	4108	64	103	344	94	90	0	0.244	0.248	0.254	0.274	1.596	0.239	0.952	120	597	13139	10941	-2.035	2577	10562	2175	8766	0
4	16	13	itA(UGC)E	itA(UGC)E	19020	16300	130	590	609	341	50	56	36	98	95	0	1407	1351	729	62	78	117	95	89	0	0.401	0.434	0.433	0.461	1.604	0.428	0.924	120	579	1885	1848	-1.317	540	1345	559	1289	0
4	17	13	iYER078C	iYER078C	19210	16300	130	744	669	273	49	51	14	98	96	0	4444	3858	1747	61	69	85	93	92	0	0.159	0.163	0.166	0.195	1.947	0.154	0.944	120	580	5078	4417	-2.657	695	4383	620	3797	0
4	18	13	iYER082C	iYER082C	19410	16300	130	1176	1104	520	49	52	39	97	93	0	2116	1855	879	62	62	40	94	91	0	0.549	0.588	0.592	0.615	1.527	0.573	0.953	120	596	3181	2848	-0.866	1127	2054	1055	1793	0
4	19	13	iYER096W	iYER096W	19610	16300	130	254	254	108	49	51	15	96	92	0	594	585	284	61	63	49	90	86	0	0.385	0.391	0.387	0.417	1.666	0.37	0.887	120	596	738	729	-1.379	205	533	205	524	0
4	20	13	iYER098W	iYER098W	19810	16290	130	1405	1265	465	49	52	23	100	100	0	1936	1683	605	61	61	39	100	100	0	0.723	0.75	0.753	0.757	1.366	0.735	0.953	120	615	3231	2838	-0.468	1356	1875	1216	1622	0
4	21	13	iYER102W	iYER102W	20020	16290	130	1563	1380	517	50	52	22	99	98	0	5191	4410	1632	61	60	37	99	99	0	0.295	0.306	0.31	0.308	1.363	0.299	0.957	120	692	6643	5679	-1.762	1513	5130	1330	4349	0
4	1	14	iYER118C	iYER118C	16010	16540	140	979	863	366	50	51	12	99	98	0	3256	2714	1219	62	60	18	98	95	0	0.291	0.307	0.307	0.34	1.721	0.295	0.936	156	733	4123	3465	-1.782	929	3194	813	2652	0
4	2	14	iYER123W	iYER123W	16210	16540	140	2233	1961	834	50	53	28	100	99	0	4738	3971	1836	64	62	22	98	98	0	0.467	0.489	0.489	0.579	2.099	0.471	0.941	156	643	6857	5818	-1.098	2183	4674	1911	3907	0
4	3	14	iYER127W	iYER127W	16420	16540	130	885	858	343	50	51	11	98	97	0	2893	2614	959	63	61	18	98	98	0	0.295	0.317	0.309	0.321	1.358	0.312	0.94	120	581	3665	3359	-1.761	835	2830	808	2551	0
4	4	14	iYGL200C	iYGL200C	16610	16530	130	1859	1678	605	51	56	47	99	96	0	5059	4461	1798	64	72	142	95	95	0	0.362	0.37	0.367	0.423	1.898	0.35	0.938	120	596	6803	6024	-1.466	1808	4995	1627	4397	0
4	5	14	iYGL195W	iYGL195W	16820	16530	130	3387	3187	1524	52	55	26	100	99	0	3738	3429	1766	64	69	104	94	91	0	0.908	0.932	0.931	1.004	1.515	0.911	0.939	120	614	7009	6500	-0.14	3335	3674	3135	3365	0
4	6	14	iYGL190C	iYGL190C	17010	16530	130	1429	1265	602	49	58	66	96	92	0	5831	4977	2513	64	86	272	93	90	0	0.239	0.248	0.249	0.277	1.75	0.237	0.924	120	614	7147	6129	-2.063	1380	5767	1216	4913	0
4	7	14	iYGL176C	iYGL176C	17220	16520	130	2348	2016	872	49	58	67	100	96	0	3318	2930	1323	64	87	271	92	89	0	0.707	0.686	0.696	0.736	1.728	0.68	0.939	120	614	5553	4833	-0.501	2299	3254	1967	2866	0
4	8	14	iYGL172W	iYGL172W	17420	16520	130	717	713	290	50	53	30	98	95	0	2779	2509	1014	62	61	20	99	97	0	0.245	0.271	0.266	0.286	1.722	0.26	0.925	120	579	3384	3110	-2.026	667	2717	663	2447	0
4	9	14	iYGL169W	iYGL169W	17620	16520	140	345	339	158	50	58	62	89	82	0	414	442	296	62	68	98	84	77	0	0.838	0.761	0.805	0.862	1.941	0.608	0.699	156	675	647	669	-0.255	295	352	289	380	0
4	10	14	iYGL152C	iYGL152C	17830	16520	130	1240	1098	502	49	57	61	98	90	0	2242	1948	917	61	66	96	95	89	0	0.546	0.556	0.567	0.584	1.484	0.544	0.944	120	578	3372	2936	-0.873	1191	2181	1049	1887	0
4	11	14	iYGL147C	iYGL147C	18020	16520	130	679	664	266	49	51	13	99	98	0	2803	2624	1053	61	59	18	100	100	0	0.23	0.24	0.242	0.245	1.603	0.231	0.93	120	568	3372	3178	-2.122	630	2742	615	2563	0
4	12	14	iYGL143C	iYGL143C	18210	16510	130	1464	1286	568	50	52	18	100	97	0	3243	2694	1286	60	60	23	97	96	0	0.444	0.469	0.467	0.503	1.722	0.452	0.944	120	597	4597	3870	-1.171	1414	3183	1236	2634	0
4	13	14	iYGL125W	iYGL125W	18420	16510	130	566	642	382	50	51	18	96	93	0	808	886	568	61	61	31	92	90	0	0.691	0.718	0.705	0.748	1.702	0.681	0.897	120	594	1263	1417	-0.534	516	747	592	825	0
4	14	14	iYGL121C	iYGL121C	18620	16510	140	628	579	252	50	56	73	93	87	0	1787	1559	715	62	79	298	88	83	0	0.335	0.353	0.351	0.375	1.835	0.342	0.92	156	643	2303	2026	-1.577	578	1725	529	1497	0
4	15	14	iYGL118C	iYGL118C	18820	16500	130	216	220	103	49	56	78	83	54	0	983	854	398	60	80	318	80	72	0	0.181	0.215	0.203	0.23	1.759	0.203	0.819	120	562	1090	965	-2.466	167	923	171	794	0
4	16	14	iYGR165W	iYGR165W	19020	16500	140	1020	946	409	49	55	38	96	95	0	2924	2455	1194	60	68	87	94	93	0	0.339	0.375	0.378	0.431	1.942	0.356	0.925	156	635	3835	3292	-1.56	971	2864	897	2395	0
4	17	14	iYGR169C	iYGR169C	19220	16500	140	2478	2254	1139	49	50	11	99	98	0	7752	6515	3635	60	62	60	94	93	0	0.316	0.342	0.331	0.408	2.055	0.325	0.944	156	619	10121	8660	-1.663	2429	7692	2205	6455	0
4	18	14	iYGR173W	iYGR173W	19430	16500	140	1603	1411	681	49	53	29	98	95	0	3181	2830	1645	62	63	45	94	94	0	0.498	0.492	0.505	0.546	2.067	0.436	0.814	156	649	4673	4130	-1.005	1554	3119	1362	2768	0
4	19	14	iYGRWdelta31	iYGRWdelta31	19630	16490	130	1351	1355	903	49	53	31	96	93	0	2747	2602	1519	61	64	49	95	91	0	0.485	0.514	0.478	0.548	1.906	0.499	0.822	120	565	3988	3847	-1.045	1302	2686	1306	2541	0
4	20	14	iYGR191W	iYGR191W	19820	16490	130	1086	1022	458	49	51	15	98	96	0	3122	2844	1339	61	60	27	97	95	0	0.339	0.35	0.354	0.365	1.552	0.333	0.934	120	629	4098	3756	-1.562	1037	3061	973	2783	0
4	21	14	iYGR195W	iYGR195W	20030	16490	130	873	819	368	49	51	20	100	99	0	1999	1923	924	62	65	103	96	92	0	0.425	0.414	0.422	0.43	1.491	0.397	0.932	120	667	2761	2631	-1.233	824	1937	770	1861	0
4	1	15	iYGR211W	iYGR211W	16030	16740	140	3094	2694	1108	50	59	67	99	97	0	4604	3850	1698	65	73	92	95	95	0	0.671	0.699	0.69	0.754	1.559	0.683	0.96	156	735	7583	6429	-0.576	3044	4539	2644	3785	0
4	2	15	iYGR215W	iYGR215W	16230	16740	130	1066	1085	606	49	62	78	91	88	0	1449	1416	814	64	77	108	90	86	0	0.734	0.766	0.774	0.793	1.611	0.748	0.958	120	541	2402	2388	-0.446	1017	1385	1036	1352	0
4	3	15	iYGRCtau3	iYGRCtau3	16420	16730	130	462	448	183	49	50	11	98	97	0	640	603	239	63	62	18	96	95	0	0.716	0.739	0.738	0.742	1.453	0.719	0.936	120	580	990	939	-0.482	413	577	399	540	0
4	4	15	iYGR234W	iYGR234W	16630	16730	140	2526	2103	1100	51	53	23	98	98	0	4415	3733	2109	62	64	49	96	94	0	0.569	0.559	0.568	0.636	1.783	0.547	0.962	156	682	6828	5723	-0.815	2475	4353	2052	3671	0
4	5	15	iYGR238C	iYGR238C	16830	16730	130	1111	1037	392	51	54	24	100	99	0	3080	2773	1166	62	64	49	99	96	0	0.351	0.364	0.36	0.389	1.36	0.352	0.967	120	596	4078	3697	-1.51	1060	3018	986	2711	0
4	6	15	iYGR243W	iYGR243W	17030	16730	130	292	304	146	50	55	50	97	89	0	959	977	451	63	77	251	95	82	0	0.27	0.278	0.272	0.274	1.43	0.27	0.832	120	616	1138	1168	-1.888	242	896	254	914	0
4	7	15	iYHR177W	iYHR177W	17230	16720	130	3999	3527	1840	50	61	77	96	92	0	8266	6956	3880	63	70	102	90	90	0	0.481	0.504	0.502	0.591	1.669	0.485	0.964	120	614	12152	10370	-1.055	3949	8203	3477	6893	0
4	8	15	iYHR180W	iYHR180W	17420	16720	130	3596	3109	1513	52	55	32	98	96	0	8290	6902	3510	63	67	77	95	93	0	0.431	0.447	0.439	0.491	1.566	0.428	0.958	120	612	11771	9896	-1.215	3544	8227	3057	6839	0
4	9	15	iYHR183W	iYHR183W	17630	16720	130	3065	2598	1163	51	63	99	94	93	0	5947	4834	2318	63	91	239	92	88	0	0.512	0.534	0.529	0.577	1.514	0.511	0.957	120	584	8898	7318	-0.965	3014	5884	2547	4771	0
4	10	15	iYHR200W	iYHR200W	17820	16720	130	586	690	425	49	61	87	92	86	0	1791	1794	993	62	82	185	94	90	0	0.311	0.37	0.342	0.365	1.436	0.373	0.93	120	571	2266	2373	-1.687	537	1729	641	1732	0
4	11	15	iYHR204W	iYHR204W	18040	16710	130	990	885	372	49	54	29	98	95	0	3725	3220	1366	62	65	59	98	96	0	0.257	0.265	0.266	0.28	1.661	0.259	0.957	120	599	4604	3994	-1.961	941	3663	836	3158	0
4	12	15	iYHR208W	iYHR208W	18240	16710	130	4089	3715	1498	50	54	23	100	100	0	4314	3807	1568	62	61	23	100	100	0	0.95	0.979	0.98	1.024	1.4	0.974	0.963	120	539	8291	7410	-0.074	4039	4252	3665	3745	0
4	13	15	iYIL166C	iYIL166C	18430	16710	140	1430	1317	672	48	50	11	98	96	0	4326	3671	1981	62	60	20	94	94	0	0.324	0.352	0.355	0.419	2.256	0.338	0.947	156	562	5646	4878	-1.625	1382	4264	1269	3609	0
4	14	15	iYIL162W	iYIL162W	18630	16710	130	1110	968	401	50	57	64	93	91	0	3740	3148	1448	62	67	96	94	90	0	0.288	0.297	0.291	0.323	1.711	0.284	0.961	120	524	4738	4004	-1.795	1060	3678	918	3086	0
4	15	15	iYIL157C	iYIL157C	18840	16700	130	1792	1581	802	50	59	67	92	90	0	6052	5226	2798	61	67	94	92	90	0	0.291	0.296	0.297	0.323	1.629	0.285	0.957	120	557	7733	6696	-1.782	1742	5991	1531	5165	0
4	16	15	iYIL140W	iYIL140W	19030	16710	130	1774	1574	780	49	53	30	97	96	0	2849	2364	1299	60	58	19	95	95	0	0.619	0.662	0.668	0.749	1.605	0.641	0.955	120	464	4514	3829	-0.693	1725	2789	1525	2304	0
4	17	15	iYIL136W	iYIL136W	19220	16700	140	2646	2468	1274	50	51	11	100	100	0	7554	6483	3358	61	59	18	99	98	0	0.346	0.377	0.372	0.423	1.708	0.37	0.962	156	528	10089	8840	-1.529	2596	7493	2418	6422	0
4	18	15	iYIL133C	iYIL133C	19420	16700	130	880	899	488	50	51	18	96	93	0	4003	3807	2003	62	61	27	97	93	0	0.211	0.227	0.216	0.243	1.622	0.218	0.923	120	510	4771	4594	-2.247	830	3941	849	3745	0
4	19	15	iYJL112W	iYJL112W	19620	16690	130	1748	1620	757	49	53	33	98	97	0	7384	6251	2971	63	64	40	96	95	0	0.232	0.254	0.25	0.284	1.751	0.242	0.94	120	558	9020	7759	-2.107	1699	7321	1571	6188	0
4	20	15	iYJL107C	iYJL107C	19820	16700	130	939	834	401	48	51	13	96	94	0	7713	6405	3353	61	59	20	92	91	0	0.116	0.124	0.125	0.155	2.433	0.117	0.938	120	515	8543	7130	-3.102	891	7652	786	6344	0
4	21	15	iYJL104W	iYJL104W	20020	16690	140	2287	2037	1044	49	51	12	99	98	0	5429	4472	2552	62	63	89	91	89	0	0.417	0.451	0.445	0.547	2.028	0.428	0.956	156	768	7605	6398	-1.262	2238	5367	1988	4410	0
4	1	16	iYJL089W	iYJL089W	16020	16940	130	654	678	377	50	51	11	99	99	0	2226	2049	1132	64	68	66	94	91	0	0.279	0.316	0.31	0.37	1.794	0.306	0.935	120	594	2766	2613	-1.84	604	2162	628	1985	0
4	2	16	iYJL083W	iYJL083W	16220	16940	140	1376	1270	614	49	60	73	96	93	0	3195	2727	1396	64	80	115	94	91	0	0.424	0.459	0.457	0.53	1.758	0.442	0.939	156	538	4458	3884	-1.238	1327	3131	1221	2663	0
4	3	16	iYJL079C	iYJL079C	16410	16930	130	1804	1612	737	50	51	12	99	99	0	6694	5595	2640	63	63	28	100	100	0	0.265	0.282	0.286	0.295	1.415	0.27	0.963	120	529	8385	7094	-1.919	1754	6631	1562	5532	0
4	4	16	iYJL060W	iYJL060W	16620	16930	130	1104	976	430	51	52	14	98	96	0	2218	1909	915	63	64	32	94	91	0	0.489	0.501	0.497	0.554	1.718	0.482	0.962	120	546	3208	2771	-1.033	1053	2155	925	1846	0
4	5	16	iYJL055W	iYJL055W	16820	16930	130	669	589	275	51	53	13	97	96	0	2169	1856	941	62	63	24	97	95	0	0.293	0.3	0.309	0.318	1.366	0.286	0.951	120	549	2725	2332	-1.77	618	2107	538	1794	0
4	6	16	iYJL051W	iYJL051W	17020	16930	130	1206	1096	470	51	53	13	99	99	0	1830	1658	734	62	63	33	97	97	0	0.653	0.655	0.653	0.69	1.421	0.64	0.963	120	553	2923	2641	-0.614	1155	1768	1045	1596	0
4	7	16	itR(UCU)J2	itR(UCU)J2	17230	16930	130	439	422	195	50	58	58	90	85	0	2400	2086	1053	62	66	53	92	91	0	0.166	0.184	0.186	0.206	1.891	0.17	0.912	120	535	2727	2396	-2.587	389	2338	372	2024	0
4	8	16	iYJLCdelta7	iYJLCdelta7	17420	16920	130	1669	1409	662	51	53	18	100	100	0	3182	2622	1295	63	63	58	97	92	0	0.519	0.531	0.533	0.579	1.488	0.519	0.971	120	558	4737	3917	-0.947	1618	3119	1358	2559	0
4	9	16	iYJL034W	iYJL034W	17630	16920	130	1588	1403	600	52	103	259	88	84	0	3150	2778	1316	64	162	513	86	82	0	0.498	0.498	0.5	0.542	1.44	0.479	0.968	120	492	4622	4065	-1.007	1536	3086	1351	2714	-100
4	10	16	iYKL134C	iYKL134C	17800	16920	150	96	543	639	51	95	243	41	37	0	161	923	1107	62	147	480	41	37	0	0.455	0.571	0.56	0.545	2.094	0.549	0.965	156	565	144	1353	-1.138	45	99	492	861	-100
4	11	16	iYKL129C	iYKL129C	17930	16910	130	222	228	97	49	53	28	95	92	0	744	767	388	61	64	64	97	96	0	0.253	0.254	0.25	0.256	1.692	0.237	0.884	120	500	856	885	-1.981	173	683	179	706	0
4	12	16	iYKL126W	iYKL126W	18130	16910	140	910	828	393	49	51	18	96	93	0	4204	3614	1855	61	60	19	97	96	0	0.208	0.219	0.215	0.234	1.857	0.211	0.951	156	630	5004	4332	-2.267	861	4143	779	3553	0
4	13	16	iYKL108W	iYKL108W	18330	16910	140	3437	3103	1446	48	50	11	100	100	0	6063	5226	2618	61	60	20	99	98	0	0.565	0.591	0.583	0.665	1.848	0.575	0.962	156	583	9391	8220	-0.825	3389	6002	3055	5165	0
4	14	16	iYKL104C	iYKL104C	18530	16900	150	482	433	179	48	50	12	97	94	0	3899	3232	1446	61	59	18	98	95	0	0.113	0.121	0.12	0.125	1.523	0.118	0.949	156	619	4272	3556	-3.145	434	3838	385	3171	0
4	15	16	iYKL100C	iYKL100C	18730	16900	150	1095	977	417	49	55	58	98	95	0	2319	2074	1019	62	65	87	96	93	0	0.463	0.461	0.477	0.53	1.687	0.442	0.959	156	647	3303	2940	-1.11	1046	2257	928	2012	0
4	16	16	iYKL086W	iYKL086W	18930	16890	150	270	287	168	49	54	46	88	73	0	896	927	593	62	64	79	90	84	0	0.265	0.275	0.276	0.29	1.641	0.271	0.941	156	635	1055	1103	-1.916	221	834	238	865	0
4	17	16	iYKL081W	iYKL081W	19130	16890	150	286	262	112	50	51	11	94	93	0	2052	1723	837	62	59	19	94	92	0	0.119	0.128	0.131	0.144	1.849	0.125	0.933	156	605	2226	1873	-3.076	236	1990	212	1661	0
4	18	16	iYKL077W	iYKL077W	19330	16890	150	871	764	316	50	51	12	99	98	0	1904	1601	718	62	61	33	96	94	0	0.446	0.464	0.461	0.508	1.651	0.452	0.966	156	601	2663	2253	-1.166	821	1842	714	1539	0
4	19	16	iYKLWdelta7	iYKLWdelta7	19530	16890	150	245	238	102	50	52	17	96	91	0	1262	1101	579	62	63	41	92	90	0	0.162	0.181	0.179	0.213	2.053	0.171	0.905	156	647	1395	1227	-2.621	195	1200	188	1039	0
4	20	16	iYKL063C-0	iYKL063C-0	19730	16880	150	1147	1000	424	49	50	12	99	98	0	3326	2744	1274	61	60	21	96	94	0	0.336	0.354	0.361	0.412	1.84	0.344	0.968	156	639	4363	3634	-1.572	1098	3265	951	2683	0
4	21	16	iYKL060C	iYKL060C	19930	16880	150	3215	2750	1430	49	51	13	98	96	0	4653	3773	2157	60	60	47	89	89	0	0.689	0.727	0.717	0.841	1.737	0.702	0.972	156	757	7759	6414	-0.537	3166	4593	2701	3713	0
4	1	17	iYLR056W	iYLR056W	15950	17130	150	1576	1390	700	49	51	11	96	95	0	3115	2646	1339	63	67	98	93	92	0	0.5	0.519	0.521	0.528	1.652	0.515	0.942	156	770	4579	3924	-0.999	1527	3052	1341	2583	0
4	2	17	iYLR060W	iYLR060W	16150	17130	150	805	727	293	49	51	20	100	100	0	1620	1462	629	63	69	108	95	92	0	0.486	0.485	0.503	0.507	1.391	0.437	0.876	156	623	2313	2077	-1.042	756	1557	678	1399	0
4	3	17	iYLR065C	iYLR065C	16350	17120	150	1491	1324	671	49	50	11	98	96	0	2339	2071	1085	61	68	93	91	90	0	0.633	0.634	0.636	0.658	1.59	0.623	0.955	156	631	3720	3285	-0.66	1442	2278	1275	2010	0
4	4	17	iYLR082C	iYLR082C	16550	17120	150	2162	1886	867	49	50	12	100	98	0	3651	3054	1459	61	65	83	94	91	0	0.589	0.614	0.622	0.68	1.576	0.603	0.968	156	649	5703	4830	-0.765	2113	3590	1837	2993	0
4	5	17	iYLR086W	iYLR086W	16750	17120	150	5869	5061	2415	49	50	11	100	100	0	3070	2577	1315	63	62	22	94	92	0	1.935	1.994	1.992	2.417	1.885	1.967	0.971	156	618	8827	7526	0.953	5820	3007	5012	2514	0
4	6	17	iYLR090W	iYLR090W	16950	17120	150	1672	1541	679	50	51	11	100	100	0	4765	3957	1825	61	60	19	99	98	0	0.345	0.383	0.382	0.426	1.745	0.371	0.95	156	622	6326	5387	-1.536	1622	4704	1491	3896	0
4	7	17	iYLRCdelta5	iYLRCdelta5	17150	17110	150	709	750	453	50	52	26	92	91	0	1386	1510	1040	62	62	37	92	88	0	0.498	0.483	0.494	0.554	1.772	0.457	0.949	156	626	1983	2148	-1.007	659	1324	700	1448	0
4	8	17	iYLR110C	iYLR110C	17350	17110	150	437	428	214	50	52	27	91	88	0	3358	2852	1506	62	61	28	94	92	0	0.117	0.135	0.139	0.16	1.952	0.131	0.908	156	644	3683	3168	-3.09	387	3296	378	2790	0
4	9	17	itR(ACG)L	itR(ACG)L	17560	17110	140	1773	1552	660	49	73	188	93	89	0	3153	2678	1219	62	101	353	89	87	0	0.558	0.575	0.571	0.623	1.549	0.558	0.959	156	619	4815	4119	-0.842	1724	3091	1503	2616	0
4	10	17	iYLR129W	iYLR129W	17760	17110	140	1058	999	411	50	83	220	91	85	0	2932	2602	1140	62	120	419	91	85	0	0.351	0.374	0.369	0.412	1.832	0.367	0.935	156	579	3878	3489	-1.51	1008	2870	949	2540	0
4	11	17	iYLR133W	iYLR133W	17970	17140	140	1793	1600	643	48	49	11	100	100	0	3678	3244	1340	61	76	358	94	90	0	0.482	0.488	0.491	0.51	1.408	0.479	0.96	156	634	5362	4735	-1.052	1745	3617	1552	3183	0
4	12	17	iYLR137W	iYLR137W	18160	17130	140	1225	1169	525	48	49	11	100	99	0	3774	3351	1498	60	73	356	93	91	0	0.317	0.341	0.346	0.36	1.544	0.334	0.954	156	629	4891	4412	-1.658	1177	3714	1121	3291	0
4	13	17	iYLR448W	iYLR448W	18360	17120	130	697	644	233	48	49	11	100	99	0	3120	2768	1063	60	61	25	99	98	0	0.212	0.22	0.22	0.239	1.656	0.212	0.952	120	599	3709	3304	-2.237	649	3060	596	2708	0
4	14	17	iYLR452C	iYLR452C	18560	17120	130	819	823	300	48	49	12	100	100	0	3953	3539	1102	61	61	32	100	100	0	0.198	0.223	0.222	0.225	1.375	0.213	0.915	120	633	4663	4253	-2.336	771	3892	775	3478	0
4	15	17	iYLRCdelta27	iYLRCdelta27	18760	17110	130	2612	2487	898	48	50	15	100	100	0	4248	4024	1475	62	62	36	100	100	0	0.613	0.616	0.619	0.625	1.206	0.6	0.97	120	631	6750	6401	-0.707	2564	4186	2439	3962	0
4	16	17	iYML129C	iYML129C	18960	17120	130	784	737	304	49	51	15	100	98	0	3661	3141	1282	61	61	25	99	97	0	0.204	0.223	0.222	0.244	1.712	0.212	0.924	120	631	4335	3768	-2.292	735	3600	688	3080	0
4	17	17	iYML125C	iYML125C	19160	17110	130	1137	1057	369	50	51	11	100	100	0	2315	2121	750	63	60	19	98	98	0	0.483	0.489	0.49	0.525	1.708	0.477	0.96	120	612	3339	3065	-1.051	1087	2252	1007	2058	0
4	18	17	iYML121W	iYML121W	19360	17110	140	2930	2565	987	49	50	11	100	100	0	3096	2615	1000	63	62	37	98	98	0	0.95	0.986	0.99	1.016	1.459	0.983	0.966	156	671	5914	5068	-0.074	2881	3033	2516	2552	0
4	19	17	iYML105C	iYML105C	19560	17110	130	1704	1530	561	49	50	13	100	100	0	1695	1536	617	61	61	39	97	95	0	1.013	1.004	1.012	1.066	1.486	0.964	0.956	120	610	3289	2956	0.018	1655	1634	1481	1475	0
4	20	17	iYML100W	iYML100W	19770	17100	130	2130	1880	687	49	50	14	100	100	0	1706	1485	523	61	59	20	99	99	0	1.265	1.286	1.306	1.296	1.297	1.292	0.963	120	644	3726	3255	0.339	2081	1645	1831	1424	0
4	21	17	iYML095C	iYML095C	19970	17100	130	891	765	331	49	51	14	98	96	0	1387	1168	534	60	60	48	90	87	0	0.635	0.646	0.64	0.697	1.615	0.623	0.947	120	717	2169	1824	-0.656	842	1327	716	1108	0
4	1	18	iYML077W	iYML077W	15970	17340	130	3802	3447	1325	49	55	46	100	100	0	2683	2430	903	64	71	140	99	96	0	1.433	1.436	1.45	1.464	1.388	1.425	0.9	120	659	6372	5764	0.519	3753	2619	3398	2366	0
4	2	18	iYML074C-1	iYML074C-1	16180	17350	130	3964	3761	1407	49	54	46	100	100	0	4369	4016	1393	62	61	24	100	100	0	0.909	0.939	0.935	0.933	1.293	0.936	0.952	120	615	8222	7666	-0.138	3915	4307	3712	3954	0
4	3	18	itR(UCU)M2	itR(UCU)M2	16370	17350	130	914	955	474	48	50	11	100	100	0	2064	1945	776	60	67	111	99	97	0	0.432	0.481	0.465	0.474	1.402	0.472	0.895	120	603	2870	2792	-1.21	866	2004	907	1885	0
4	4	18	iYMR210W	iYMR210W	16580	17340	140	500	458	195	48	49	10	99	99	0	1998	1716	756	61	66	105	95	90	0	0.233	0.248	0.251	0.253	1.533	0.241	0.918	156	652	2389	2065	-2.099	452	1937	410	1655	0
4	5	18	iYMR214W	iYMR214W	16780	17340	140	767	695	303	49	50	10	99	99	0	2754	2417	1100	61	60	19	98	98	0	0.267	0.274	0.272	0.297	1.62	0.265	0.937	156	619	3411	3002	-1.907	718	2693	646	2356	0
4	6	18	iYMR218C	iYMR218C	16980	17330	130	456	431	162	49	50	11	99	99	0	2284	2026	909	61	61	39	98	96	0	0.183	0.194	0.2	0.216	1.732	0.182	0.925	120	598	2630	2347	-2.449	407	2223	382	1965	0
4	7	18	iYMR234W	iYMR234W	17180	17330	130	1190	1059	410	51	51	12	100	100	0	1948	1699	729	62	61	38	98	95	0	0.604	0.616	0.623	0.675	1.598	0.594	0.935	120	632	3025	2645	-0.728	1139	1886	1008	1637	0
4	8	18	iYMR238W	iYMR238W	17380	17330	130	605	546	216	51	52	12	97	97	0	1021	897	372	62	60	19	95	93	0	0.578	0.593	0.591	0.623	1.59	0.574	0.935	120	610	1513	1330	-0.792	554	959	495	835	0
4	9	18	iYMR241W	iYMR241W	17580	17330	140	1533	1340	549	50	52	12	100	100	0	1579	1339	596	61	60	20	97	96	0	0.977	1.009	1.019	1.147	1.743	0.981	0.953	156	671	3001	2568	-0.034	1483	1518	1290	1278	0
4	10	18	iYMR255W	iYMR255W	17790	17330	120	1817	1610	631	50	52	12	100	100	0	3002	2700	1150	62	61	21	97	97	0	0.601	0.591	0.585	0.641	1.505	0.572	0.946	120	570	4707	4198	-0.735	1767	2940	1560	2638	0
4	11	18	iYMR259C	iYMR259C	17990	17330	130	888	803	318	48	50	13	100	99	0	1767	1555	669	61	79	384	88	80	0	0.492	0.505	0.499	0.524	1.392	0.483	0.924	120	553	2546	2249	-1.022	840	1706	755	1494	0
4	12	18	iYMR263W	iYMR263W	18190	17330	130	711	675	254	48	49	11	100	100	0	4770	4368	1813	60	75	370	95	92	0	0.141	0.146	0.143	0.156	1.599	0.133	0.887	120	582	5373	4935	-2.829	663	4710	627	4308	0
4	13	18	iYMR277W	iYMR277W	18390	17320	130	1464	1314	651	48	49	12	99	99	0	4654	4089	2209	61	62	44	95	95	0	0.308	0.314	0.313	0.364	1.831	0.302	0.952	120	629	6009	5294	-1.698	1416	4593	1266	4028	0
4	14	18	iYMR282C	iYMR282C	18600	17320	130	386	343	153	49	50	13	95	91	0	2817	2405	1120	61	62	49	94	91	0	0.122	0.125	0.122	0.133	2.044	0.124	0.915	120	600	3093	2638	-3.032	337	2756	294	2344	0
4	15	18	iYMR284W	iYMR284W	18790	17320	130	838	757	331	50	53	21	96	92	0	1105	962	424	63	63	36	91	90	0	0.756	0.786	0.78	0.817	1.55	0.773	0.939	120	597	1830	1606	-0.403	788	1042	707	899	0
4	16	18	iYNL061W	iYNL061W	18990	17310	130	4245	3667	1610	50	52	19	100	100	0	2700	2259	1056	61	60	19	98	98	0	1.59	1.646	1.6	1.835	1.594	1.608	0.954	120	598	6834	5815	0.669	4195	2639	3617	2198	0
4	17	18	iYNL055C	iYNL055C	19190	17310	130	1667	1544	668	50	52	13	100	100	0	3746	3195	1302	62	61	19	100	99	0	0.439	0.477	0.479	0.497	1.49	0.467	0.937	120	621	5301	4627	-1.188	1617	3684	1494	3133	0
4	18	18	iYNL052W	iYNL052W	19400	17310	130	705	646	236	50	51	14	100	100	0	2563	2252	860	61	60	20	100	100	0	0.262	0.272	0.273	0.289	1.439	0.267	0.946	120	610	3157	2787	-1.934	655	2502	596	2191	0
4	19	18	iYNL036W	iYNL036W	19600	17300	130	3290	3001	1350	49	51	15	100	100	0	1966	1832	837	61	60	20	99	98	0	1.701	1.667	1.679	1.776	1.46	1.667	0.964	120	585	5146	4723	0.767	3241	1905	2952	1771	0
4	20	18	iYNL035C	iYNL035C	19790	17300	130	1194	1185	546	49	51	14	100	100	0	1245	1152	565	61	60	19	96	94	0	0.967	1.041	1.041	1.161	1.551	1.007	0.954	120	615	2329	2227	-0.048	1145	1184	1136	1091	0
4	21	18	iYNL032W	iYNL032W	20000	17300	130	251	276	140	49	51	13	99	96	0	303	321	158	61	59	19	94	91	0	0.835	0.873	0.869	0.89	1.66	0.847	0.871	120	713	444	487	-0.261	202	242	227	260	0
4	1	19	iYNL016W	iYNL016W	15990	17550	130	731	658	269	49	52	20	100	98	0	3138	2643	1299	62	68	114	95	94	0	0.222	0.236	0.232	0.266	1.745	0.214	0.914	120	674	3758	3190	-2.173	682	3076	609	2581	0
4	2	19	iYNL011C	iYNL011C	16200	17540	130	1163	1058	432	48	52	43	99	95	0	2323	2048	945	62	69	117	94	92	0	0.493	0.509	0.519	0.57	1.681	0.481	0.936	120	589	3376	2996	-1.02	1115	2261	1010	1986	0
4	3	19	iYNL007C	iYNL007C	16390	17540	130	1950	1751	686	48	50	12	100	100	0	2675	2440	1080	61	87	426	92	86	0	0.728	0.716	0.711	0.8	1.629	0.617	0.836	120	581	4516	4082	-0.459	1902	2614	1703	2379	0
4	4	19	iYNR007C	iYNR007C	16600	17540	140	1431	1262	593	48	50	11	100	100	0	3908	3416	1741	61	82	407	88	86	0	0.36	0.362	0.364	0.41	1.584	0.349	0.963	156	634	5230	4569	-1.476	1383	3847	1214	3355	0
4	5	19	iYNR011C	iYNR011C	16800	17540	140	721	687	308	49	50	11	99	98	0	2502	2312	1114	60	59	19	98	97	0	0.275	0.283	0.279	0.299	1.717	0.274	0.938	156	604	3114	2890	-1.862	672	2442	638	2252	0
4	6	19	iYNR015W	iYNR015W	17000	17530	130	689	662	299	49	50	12	98	96	0	2001	1838	910	61	62	46	93	90	0	0.33	0.345	0.35	0.381	1.566	0.328	0.947	120	612	2580	2390	-1.6	640	1940	613	1777	0
4	7	19	iYOR055W	iYOR055W	17210	17530	130	462	420	181	50	51	12	95	93	0	2025	1706	840	62	62	40	92	90	0	0.21	0.225	0.233	0.247	1.783	0.216	0.939	120	611	2375	2014	-2.252	412	1963	370	1644	0
4	8	19	iYOR058C-1	iYOR058C-1	17400	17530	130	1150	973	472	51	52	12	100	100	0	3013	2488	1318	61	62	34	93	92	0	0.372	0.38	0.376	0.425	1.623	0.357	0.951	120	576	4051	3349	-1.426	1099	2952	922	2427	0
4	9	19	iYOR060C	iYOR060C	17600	17530	140	1467	1283	608	51	52	12	100	99	0	4162	3522	1880	61	64	35	96	94	0	0.345	0.356	0.354	0.416	1.743	0.336	0.956	156	651	5517	4693	-1.534	1416	4101	1232	3461	0
4	10	19	iYOR073W	iYOR073W	17800	17530	130	1204	1099	417	50	51	13	100	100	0	1985	1731	706	60	61	21	98	98	0	0.599	0.628	0.616	0.666	1.499	0.603	0.946	120	581	3079	2720	-0.738	1154	1925	1049	1671	0
4	11	19	iYOR077W	iYOR077W	18000	17520	130	420	400	145	48	49	11	100	100	0	2140	1936	744	59	58	18	99	99	0	0.179	0.188	0.187	0.199	1.674	0.179	0.919	120	583	2453	2229	-2.484	372	2081	352	1877	0
4	12	19	iYOR081C	iYOR081C	18190	17520	130	623	561	224	48	49	10	99	99	0	1355	1194	554	61	59	19	96	95	0	0.444	0.453	0.447	0.49	1.547	0.425	0.932	120	582	1869	1646	-1.17	575	1294	513	1133	0
4	13	19	iYOR098C	iYOR098C	18390	17520	130	471	430	185	49	50	12	100	99	0	2874	2450	1241	62	60	20	99	98	0	0.15	0.16	0.161	0.184	1.71	0.149	0.931	120	596	3234	2769	-2.736	422	2812	381	2388	0
4	14	19	iYOR103C	iYOR103C	18590	17510	130	1074	979	336	49	51	14	100	100	0	4763	4186	1502	62	65	50	100	100	0	0.218	0.226	0.224	0.23	1.265	0.217	0.953	120	616	5726	5054	-2.197	1025	4701	930	4124	0
4	15	19	iYOR108W	iYOR108W	18800	17510	130	1054	963	392	50	51	13	100	100	0	4214	3649	1584	62	63	34	100	97	0	0.242	0.255	0.257	0.282	1.658	0.246	0.955	120	598	5156	4500	-2.048	1004	4152	913	3587	0
4	16	19	iYOR125C	iYOR125C	18990	17510	130	192	201	88	50	51	19	95	90	0	1223	1046	516	60	59	19	95	95	0	0.122	0.153	0.145	0.167	1.926	0.147	0.866	120	581	1305	1137	-3.034	142	1163	151	986	0
4	17	19	iYOR129C	iYOR129C	19190	17510	130	345	307	129	50	54	34	90	84	0	3372	2779	1426	62	63	57	93	90	0	0.089	0.095	0.097	0.112	1.911	0.09	0.926	120	635	3605	2974	-3.488	295	3310	257	2717	0
4	18	19	iYOR133W	iYOR133W	19410	17510	130	972	876	428	50	54	35	98	94	0	3639	3022	1581	63	64	58	95	91	0	0.258	0.279	0.284	0.32	1.73	0.273	0.958	120	613	4498	3785	-1.956	922	3576	826	2959	0
4	19	19	iYPL241C	iYPL241C	19600	17500	130	949	859	350	50	58	61	99	93	0	2611	2264	1002	63	65	48	98	97	0	0.353	0.368	0.367	0.393	1.406	0.35	0.953	120	598	3447	3010	-1.503	899	2548	809	2201	0
4	20	19	iYPL236C	iYPL236C	19800	17500	130	1185	950	500	51	59	97	85	81	0	4985	3875	2301	64	67	50	94	88	0	0.23	0.236	0.238	0.294	1.964	0.223	0.961	120	614	6055	4710	-2.118	1134	4921	899	3811	0
4	21	19	iYPL232W	iYPL232W	20000	17500	130	741	688	293	50	52	13	100	100	0	6769	5631	2588	63	61	18	100	100	0	0.103	0.115	0.111	0.13	1.651	0.109	0.936	120	677	7397	6206	-3.279	691	6706	638	5568	0
4	1	20	iYPL216W	iYPL216W	16000	17740	130	2072	1793	769	49	50	14	100	100	0	3998	3379	1627	62	65	98	95	93	0	0.514	0.526	0.526	0.569	1.438	0.505	0.944	120	735	5959	5061	-0.96	2023	3936	1744	3317	0
4	2	20	iYPL212C	iYPL212C	16200	17740	130	349	330	118	49	51	17	98	96	0	1561	1353	600	62	69	114	93	90	0	0.2	0.218	0.209	0.235	1.531	0.203	0.909	120	694	1799	1572	-2.321	300	1499	281	1291	0
4	3	20	iYPL208W	iYPL208W	16400	17740	130	527	469	204	50	51	12	97	94	0	4963	4051	1992	62	80	384	86	85	0	0.097	0.105	0.106	0.118	1.769	0.097	0.885	120	696	5378	4408	-3.361	477	4901	419	3989	0
4	4	20	iYPL191C	iYPL191C	16600	17750	130	631	639	285	49	50	11	100	99	0	1474	1389	730	62	63	81	95	91	0	0.412	0.445	0.446	0.482	1.433	0.415	0.942	120	675	1994	1917	-1.279	582	1412	590	1327	0
4	5	20	iYPL187W	iYPL187W	16800	17740	140	3270	2714	1319	49	50	11	100	100	0	4401	3553	1969	61	59	19	98	97	0	0.742	0.763	0.757	0.918	1.824	0.727	0.95	156	767	7561	6157	-0.43	3221	4340	2665	3492	0
4	6	20	iYPL183C	iYPL183C	17000	17730	130	1386	1219	565	49	51	15	97	96	0	6727	5439	2760	61	64	59	95	91	0	0.201	0.218	0.215	0.252	1.753	0.208	0.955	120	658	8003	6548	-2.318	1337	6666	1170	5378	0
4	7	20	iYPL170W	iYPL170W	17200	17740	140	1469	1252	621	49	51	14	97	95	0	5360	4432	2322	61	63	54	92	91	0	0.268	0.275	0.271	0.309	1.829	0.264	0.945	156	807	6719	5574	-1.9	1420	5299	1203	4371	0
4	8	20	iYPL165C	iYPL165C	17400	17730	130	1201	1106	545	50	51	14	100	99	0	2429	2089	1092	61	69	127	93	88	0	0.486	0.521	0.522	0.563	1.431	0.496	0.953	120	706	3519	3084	-1.041	1151	2368	1056	2028	0
4	9	20	iYPL161C	iYPL161C	17620	17730	130	309	297	139	50	52	23	94	90	0	2671	2443	1328	60	63	43	95	95	0	0.099	0.104	0.101	0.109	1.909	0.096	0.856	120	692	2870	2630	-3.334	259	2611	247	2383	0
4	10	20	iYPR149W	iYPR149W	17810	17720	130	1747	1497	716	48	52	32	98	95	0	2827	2306	1194	61	69	122	90	87	0	0.614	0.645	0.641	0.779	1.987	0.606	0.935	120	664	4465	3694	-0.703	1699	2766	1449	2245	0
4	11	20	iYPR154W	iYPR154W	18010	17720	130	2320	1956	984	48	51	26	100	96	0	3188	2633	1445	61	72	156	88	84	0	0.727	0.742	0.735	0.849	1.863	0.7	0.928	120	695	5399	4480	-0.461	2272	3127	1908	2572	0
4	12	20	iYPR158W	iYPR158W	18210	17720	130	979	891	416	48	50	14	99	97	0	3643	3093	1499	61	70	143	95	90	0	0.26	0.278	0.28	0.302	1.635	0.258	0.918	120	678	4513	3875	-1.944	931	3582	843	3032	0
4	13	20	iYPRCtau3	iYPRCtau3	18410	17720	140	4360	3791	1838	49	50	14	100	100	0	8353	7320	3407	61	80	345	94	93	0	0.52	0.515	0.516	0.522	1.57	0.511	0.936	156	793	12603	11001	-0.944	4311	8292	3742	7259	0
4	14	20	iYPR173C	iYPR173C	18610	17710	130	877	778	379	49	51	16	98	96	0	3111	2549	1266	62	81	361	88	83	0	0.272	0.293	0.287	0.322	1.745	0.26	0.843	120	678	3877	3216	-1.881	828	3049	729	2487	0
4	15	20	iYPR179C	iYPR179C	18810	17710	130	1361	1192	538	49	50	12	100	99	0	2260	1920	951	60	61	32	95	92	0	0.596	0.615	0.625	0.707	1.647	0.592	0.95	120	693	3512	3003	-0.746	1312	2200	1143	1860	0
4	16	20	iYPR195C-0	iYPR195C-0	19020	17710	140	154	150	53	49	50	11	96	90	0	296	267	113	60	59	19	89	86	0	0.445	0.488	0.467	0.528	2.146	0.45	0.788	156	796	341	308	-1.168	105	236	101	207	0
4	17	20	iYPRWtau4	iYPRWtau4	19220	17710	130	97	96	30	49	51	15	85	71	0	206	196	78	62	60	20	89	86	0	0.333	0.351	0.357	0.342	2.172	0.304	0.569	120	680	192	181	-1.585	48	144	47	134	0
4	18	20	iYPR200C	iYPR200C	19420	17700	130	233	213	86	50	54	34	88	80	0	474	426	212	63	63	42	85	81	0	0.445	0.449	0.447	0.516	1.88	0.422	0.876	120	664	594	526	-1.167	183	411	163	363	0
4	19	20	YDRCTy1-2A	YDRCTy1-2A	19610	17700	130	35862	30245	13590	53	59	54	100	100	0	32838	26502	12937	63	67	54	100	100	0	1.093	1.142	1.13	1.246	1.552	1.123	0.949	120	679	68584	56631	0.128	35809	32775	30192	26439	0
4	20	20	YDRWdelta12	YDRWdelta12	19810	17700	130	15572	13443	5816	54	67	105	100	100	0	29850	24812	11368	66	82	169	100	99	0	0.521	0.541	0.532	0.573	1.514	0.527	0.955	120	693	45302	38135	-0.941	15518	29784	13389	24746	0
4	21	20	YERWdelta9	YERWdelta9	20020	17700	140	1231	1126	486	51	56	77	98	94	0	2820	2498	1144	63	71	140	98	94	0	0.428	0.441	0.437	0.465	1.476	0.429	0.918	156	930	3937	3510	-1.224	1180	2757	1075	2435	0
5	1	1	YBR061C	YBR061C	2480	18680	100	3414	3000	1923	45	51	56	95	93	0	6680	6463	4709	65	83	193	87	85	0	0.509	0.462	0.473	0.622	2.252	0.422	0.899	80	437	9984	9353	-0.973	3369	6615	2955	6398	0
5	2	1	MRS5	YBR091C	2670	18680	110	904	907	630	46	51	50	87	82	0	3764	3544	2507	65	80	133	86	83	0	0.232	0.247	0.242	0.256	1.974	0.237	0.851	80	580	4557	4340	-2.108	858	3699	861	3479	0
5	3	1	TFC1	YBR123C	2880	18680	110	4032	4275	3163	46	54	59	97	96	0	9281	9098	7189	65	87	157	92	91	0	0.433	0.468	0.456	0.582	2.277	0.435	0.867	80	562	13202	13262	-1.209	3986	9216	4229	9033	0
5	4	1	YBR063C	YBR063C	3070	18670	110	2245	2616	2056	46	65	111	92	88	0	4902	5517	4714	63	97	198	87	83	0	0.454	0.471	0.492	0.64	2.436	0.441	0.879	80	580	7038	8024	-1.138	2199	4839	2570	5454	0
5	5	1	PHO5	YBR093C	3280	18670	100	773	1442	1477	44	52	51	92	87	0	1350	2693	2997	65	77	125	82	78	0	0.567	0.532	0.537	0.684	2.546	0.49	0.89	80	498	2014	4026	-0.818	729	1285	1398	2628	0
5	6	1	PTC4	YBR125C	3470	18670	110	2285	2089	1566	45	57	76	92	85	0	5165	6790	5842	65	92	216	90	78	0	0.439	0.304	0.31	0.388	2.164	0.271	0.878	80	568	7340	8769	-1.187	2240	5100	2044	6725	0
5	7	1	ECM2	YBR065C	3680	18670	130	894	2252	2395	46	68	143	84	68	0	2338	5713	6349	67	105	255	85	74	0	0.373	0.391	0.392	0.462	2.545	0.367	0.904	120	733	3119	7852	-1.421	848	2271	2206	5646	0
5	8	1	YBR095C	YBR095C	3870	18660	110	1297	1282	963	47	73	155	85	68	0	5282	6143	5164	65	152	442	77	75	0	0.24	0.203	0.228	0.272	2.345	0.18	0.876	80	559	6467	7313	-2.061	1250	5217	1235	6078	0
5	9	1	VMA2	YBR127C	4070	18650	110	2158	2660	2027	48	70	99	93	85	0	6793	6929	5607	66	166	469	80	72	0	0.314	0.381	0.376	0.49	2.74	0.357	0.901	80	608	8837	9475	-1.673	2110	6727	2612	6863	0
5	10	1	TIP1	YBR067C	4290	18650	110	856	1098	893	47	69	107	85	76	0	4163	5164	4379	65	136	399	81	72	0	0.197	0.206	0.212	0.234	2.134	0.196	0.897	80	596	4907	6150	-2.341	809	4098	1051	5099	0
5	11	1	VPS15	YBR097W	4480	18650	100	645	1208	1242	47	58	77	87	76	0	1046	2520	2735	66	123	389	67	55	0	0.61	0.473	0.477	0.566	2.53	0.442	0.893	80	512	1578	3615	-0.713	598	980	1161	2454	0
5	12	1	OPY1	YBR129C	4680	18650	110	1772	1683	1291	47	81	198	82	68	0	3120	4179	3611	67	153	548	73	68	0	0.565	0.398	0.401	0.525	2.648	0.356	0.878	80	550	4778	5748	-0.824	1725	3053	1636	4112	0
5	13	1	THR4	YCR053W	4870	18640	120	4059	4791	3795	47	81	187	93	87	0	6650	7309	6040	67	150	503	84	74	0	0.609	0.655	0.633	0.794	2.204	0.631	0.939	120	696	10595	11986	-0.714	4012	6583	4744	7242	0
5	14	1	YCR086W	YCR086W	5100	18640	110	995	1264	966	47	68	102	86	82	0	4064	5794	4887	67	135	422	80	76	0	0.237	0.213	0.219	0.267	2.081	0.2	0.919	80	597	4945	6944	-2.076	948	3997	1217	5727	0
5	15	1	YCRX10W	YCRX10W	5290	18640	110	5540	5304	3597	50	175	769	82	77	0	3005	2680	1996	68	191	630	68	65	0	1.869	2.011	2.033	2.569	2.129	1.908	0.903	80	562	8427	7866	0.902	5490	2937	5254	2612	0
5	16	1	YCR055C	YCR055C	5480	18630	110	6198	6170	4638	49	387	1516	75	63	0	5483	6338	5178	68	356	1416	68	61	0	1.136	0.976	0.975	1.204	2.202	0.944	0.899	80	592	11564	12391	0.183	6149	5415	6121	6270	0
5	17	1	ABP1	YCR088W	5690	18630	110	1196	1472	1160	48	253	1274	47	26	0	7177	7961	6652	67	308	1340	71	61	0	0.161	0.18	0.178	0.237	2.768	0.173	0.913	80	597	8258	9318	-2.631	1148	7110	1424	7894	0
5	18	1	YCRX12W	YCRX12W	5900	18630	120	1519	2093	1825	48	60	76	94	89	0	1815	2520	2251	66	95	227	77	70	0	0.841	0.833	0.861	0.99	2.191	0.81	0.925	120	667	3220	4499	-0.25	1471	1749	2045	2454	0
5	19	1	PWP2	YCR057C	6080	18630	100	2751	3583	2986	49	98	250	85	80	0	3360	4978	4501	66	135	368	75	68	0	0.82	0.719	0.706	0.946	2.345	0.666	0.907	80	493	5996	8446	-0.286	2702	3294	3534	4912	0
5	20	1	YCR090C	YCR090C	6290	18620	110	3805	3482	2775	50	150	481	76	63	0	4058	4340	3616	67	207	683	66	62	0	0.941	0.803	0.787	0.978	2.082	0.781	0.92	80	607	7746	7705	-0.088	3755	3991	3432	4273	0
5	21	1	YCRX14W	YCRX14W	6500	18620	110	1325	1592	1406	50	118	422	58	52	0	2238	3308	3094	67	170	610	67	57	0	0.587	0.476	0.472	0.59	2.536	0.455	0.919	80	620	3446	4783	-0.768	1275	2171	1542	3241	0
5	1	2	YCR059C	YCR059C	2500	18870	110	1548	1395	1000	45	63	113	87	81	0	4167	3944	3137	65	112	330	75	68	0	0.366	0.348	0.353	0.492	2.877	0.312	0.85	80	546	5605	5229	-1.448	1503	4102	1350	3879	0
5	2	2	MSH3	YCR092C	2700	18870	110	5429	5523	4496	46	75	150	91	87	0	5083	6256	5544	65	124	325	77	73	0	1.073	0.885	0.828	1.014	2.942	0.834	0.842	80	533	10401	11668	0.101	5383	5018	5477	6191	0
5	3	2	YCRX16C	YCRX16C	2900	18870	130	391	488	372	46	64	112	71	60	0	1392	3284	3313	63	96	189	87	79	0	0.26	0.137	0.142	0.183	2.537	0.114	0.753	120	668	1674	3663	-1.946	345	1329	442	3221	0
5	4	2	YDR060W	YDR060W	3100	18860	100	919	979	766	46	57	92	82	75	0	1577	1984	1733	63	84	126	80	76	0	0.577	0.486	0.468	0.525	2.522	0.436	0.834	80	497	2387	2854	-0.794	873	1514	933	1921	0
5	5	2	UBC13	YDR092W	3310	18860	120	757	983	792	45	49	28	95	93	0	2964	4256	3841	64	78	163	85	79	0	0.246	0.224	0.224	0.324	3.235	0.197	0.845	120	623	3612	5130	-2.026	712	2900	938	4192	0
5	6	2	YDR124W	YDR124W	3490	18860	110	3110	3832	2999	47	123	369	80	76	0	5665	5669	4713	65	189	583	80	72	0	0.547	0.675	0.671	0.786	2.414	0.631	0.868	80	529	8663	9389	-0.87	3063	5600	3785	5604	0
5	7	2	LCB2	YDR062W	3700	18850	110	2166	2617	2188	46	128	373	75	65	0	5314	5914	5118	66	210	645	73	65	0	0.404	0.44	0.462	0.573	3.364	0.413	0.858	80	564	7368	8419	-1.308	2120	5248	2571	5848	0
5	8	2	YDR094W	YDR094W	3930	18860	120	388	363	211	46	65	126	72	57	0	2697	2708	1997	65	129	393	81	70	0	0.13	0.12	0.116	0.138	2.504	0.102	0.809	120	618	2974	2960	-2.944	342	2632	317	2643	0
5	9	2	YDR126W	YDR126W	4100	18850	110	1998	1799	1208	48	64	87	91	85	0	8705	7616	5624	67	123	328	87	82	0	0.226	0.232	0.233	0.282	2.822	0.213	0.88	80	514	10588	9300	-2.147	1950	8638	1751	7549	0
5	10	2	RPS13	YDR064W	4300	18850	100	2355	2050	1213	48	97	243	87	78	0	7810	6118	4035	68	216	716	83	77	0	0.298	0.331	0.327	0.382	2.249	0.302	0.869	80	497	10049	8052	-1.747	2307	7742	2002	6050	0
5	11	2	GIS1	YDR096W	4500	18850	100	4968	5082	3411	48	120	305	91	85	0	8960	8381	5981	69	214	711	86	78	0	0.553	0.606	0.61	0.724	2.268	0.562	0.86	80	498	13811	13346	-0.854	4920	8891	5034	8312	0
5	12	2	YDR128W	YDR128W	4700	18850	120	5397	8291	7262	48	139	422	93	87	0	3063	6236	5989	69	180	487	80	72	0	1.787	1.337	1.354	1.862	2.791	1.287	0.882	120	652	8343	14410	0.837	5349	2994	8243	6167	0
5	13	2	YDR066C	YDR066C	4910	18840	110	3052	2766	1814	48	154	477	81	73	0	7200	5779	4059	68	206	665	81	72	0	0.421	0.476	0.475	0.653	3.395	0.447	0.879	80	565	10136	8429	-1.247	3004	7132	2718	5711	0
5	14	2	GRX3	YDR098C	5120	18840	110	1674	1304	807	48	113	301	77	71	0	7282	5655	4049	67	279	1015	75	66	0	0.225	0.225	0.22	0.302	2.637	0.201	0.878	80	578	8841	6844	-2.15	1626	7215	1256	5588	0
5	15	2	YDR130C	YDR130C	5320	18830	110	3967	3598	2544	49	196	694	80	71	0	7612	6774	4941	68	342	1202	76	67	0	0.519	0.529	0.533	0.628	2.569	0.506	0.864	80	558	11462	10255	-0.945	3918	7544	3549	6706	0
5	16	2	SSN2	YDR443C	5520	18830	110	1265	1529	1227	48	214	978	55	32	0	2514	3003	2625	68	267	1078	63	52	0	0.498	0.505	0.513	0.62	2.415	0.463	0.871	80	570	3663	4416	-1.007	1217	2446	1481	2935	0
5	17	2	YDR475C	YDR475C	5710	18830	110	1301	1369	1012	49	63	64	93	87	0	2628	3321	2937	68	104	174	75	73	0	0.489	0.406	0.394	0.652	3.78	0.352	0.844	80	569	3812	4573	-1.032	1252	2560	1320	3253	0
5	18	2	GIN4	YDR507C	5920	18830	100	554	629	510	48	60	61	92	78	0	956	1211	1168	68	89	147	73	68	0	0.57	0.508	0.5	0.631	2.604	0.448	0.874	80	495	1394	1724	-0.811	506	888	581	1143	0
5	19	2	YDR445C	YDR445C	6110	18830	100	760	766	589	49	54	27	90	86	0	2069	1992	1651	68	79	83	82	75	0	0.355	0.373	0.368	0.479	3.144	0.342	0.856	80	471	2712	2641	-1.493	711	2001	717	1924	0
5	20	2	SNF1	YDR477W	6300	18820	100	646	833	650	49	56	40	88	83	0	1848	2435	2212	68	82	74	82	78	0	0.335	0.331	0.323	0.419	2.808	0.29	0.855	80	516	2377	3151	-1.576	597	1780	784	2367	0
5	21	2	YDR509W	YDR509W	6510	18820	100	330	441	374	48	55	33	88	83	0	573	818	812	68	79	61	81	77	0	0.558	0.524	0.525	0.575	2.313	0.465	0.869	80	529	787	1143	-0.841	282	505	393	750	0
5	1	3	RPS17B	YDR447C	2530	19070	120	330	526	461	45	55	84	78	60	0	1511	3408	3500	65	90	249	83	71	0	0.197	0.144	0.152	0.194	2.809	0.13	0.892	120	636	1731	3824	-2.343	285	1446	481	3343	0
5	2	3	YDR479C	YDR479C	2720	19070	120	1561	2545	2384	46	60	90	93	85	0	2825	5436	5550	64	95	228	80	75	0	0.549	0.465	0.501	0.573	2.794	0.423	0.868	120	597	4276	7871	-0.866	1515	2761	2499	5372	0
5	3	3	YDR511W	YDR511W	2930	19070	120	520	648	537	46	60	85	75	65	0	2025	3043	2968	63	107	258	75	70	0	0.242	0.202	0.219	0.26	2.828	0.176	0.851	120	600	2436	3582	-2.049	474	1962	602	2980	0
5	4	3	YDR449C	YDR449C	3120	19070	110	3277	3006	2049	46	87	229	86	82	0	3924	4175	3184	64	134	349	83	77	0	0.837	0.72	0.728	0.774	2.119	0.661	0.834	80	559	7091	7071	-0.257	3231	3860	2960	4111	0
5	5	3	PHO8	YDR481C	3330	19070	100	735	1067	978	46	85	236	73	57	0	1318	2031	2034	66	120	328	68	60	0	0.55	0.52	0.533	0.661	2.533	0.469	0.823	80	504	1941	2986	-0.862	689	1252	1021	1965	0
5	6	3	TTR1	YDR513W	3530	19060	110	2401	2105	1389	46	85	207	88	83	0	4100	4355	3094	64	143	484	85	76	0	0.583	0.48	0.469	0.539	2.071	0.438	0.847	80	570	6391	6350	-0.777	2355	4036	2059	4291	0
5	7	3	SPB4	YFL002C	3730	19060	110	9296	9188	6903	47	120	424	95	90	0	5209	5319	4170	66	153	465	83	75	0	1.798	1.74	1.739	1.981	2.268	1.79	0.84	80	565	14392	14394	0.847	9249	5143	9141	5253	0
5	8	3	HAC1	YFL031W	3930	19060	120	890	1099	944	46	106	401	63	51	0	1682	2857	2695	66	132	370	75	70	0	0.522	0.377	0.39	0.472	2.728	0.338	0.845	120	597	2460	3844	-0.937	844	1616	1053	2791	0
5	9	3	YFL061W	YFL061W	4130	19060	120	2848	3608	3035	47	91	271	83	78	0	3410	4377	3870	67	164	547	74	69	0	0.838	0.826	0.828	1.059	2.962	0.784	0.864	120	598	6144	7871	-0.255	2801	3343	3561	4310	0
5	10	3	YFL004W	YFL004W	4330	19050	120	6159	9602	8169	48	147	469	95	90	0	2461	3753	3522	67	172	542	77	66	0	2.553	2.592	2.556	3.543	2.634	2.586	0.823	120	588	8505	13240	1.352	6111	2394	9554	3686	0
5	11	3	RIM15	YFL033C	4530	19060	120	1483	2300	2231	48	108	377	75	59	0	1874	3799	3713	67	103	202	85	81	0	0.794	0.603	0.626	0.748	2.945	0.569	0.74	120	618	3242	5984	-0.333	1435	1807	2252	3732	0
5	12	3	YFL063W	YFL063W	4730	19050	110	24730	24919	16687	50	671	3995	83	77	0	20525	22471	16285	70	765	4372	78	68	0	1.207	1.11	1.097	1.238	2.266	1.084	0.839	80	543	45135	47270	0.271	24680	20455	24869	22401	0
5	13	3	YFL006W	YFL006W	4930	19040	110	5556	5949	4417	50	734	3927	57	41	0	6461	6713	5053	70	863	4323	62	43	0	0.862	0.888	0.892	1.026	2.29	0.885	0.876	80	578	11897	12542	-0.215	5506	6391	5899	6643	0
5	14	3	YFL035C	YFL035C	5140	19040	110	3465	3888	2905	49	174	773	80	66	0	7359	7067	5584	67	267	1059	71	63	0	0.468	0.548	0.577	0.792	2.902	0.534	0.871	80	563	10708	10839	-1.094	3416	7292	3839	7000	0
5	15	3	YFL065C	YFL065C	5340	19040	120	9475	11314	9025	49	129	468	93	88	0	11828	14055	11837	67	216	810	86	79	0	0.801	0.805	0.83	1	2.456	0.759	0.853	120	621	21187	25253	-0.319	9426	11761	11265	13988	0
5	16	3	SMC1	YFL008W	5520	19040	110	3478	4504	3554	49	106	404	90	78	0	5152	7222	6270	69	167	608	87	73	0	0.675	0.623	0.64	0.827	3.042	0.556	0.845	80	540	8512	11608	-0.568	3429	5083	4455	7153	0
5	17	3	YFL035C-B	YFL035C-B	5740	19030	110	2350	2893	2007	51	95	189	95	92	0	5916	6074	4591	70	162	398	88	82	0	0.393	0.473	0.49	0.601	2.52	0.436	0.828	80	576	8145	8846	-1.346	2299	5846	2842	6004	0
5	18	3	YFL067W	YFL067W	5930	19030	110	16354	16816	12530	50	124	303	96	93	0	18905	19142	14980	69	208	572	85	83	0	0.866	0.879	0.923	1.121	2.593	0.853	0.853	80	557	35140	35839	-0.208	16304	18836	16766	19073	0
5	19	3	RTG2	YGL252C	6140	19020	130	6600	8578	7065	50	122	385	95	91	0	5474	7358	6188	67	170	503	88	85	0	1.211	1.17	1.135	1.322	2.493	1.159	0.849	120	697	11957	15819	0.277	6550	5407	8528	7291	0
5	20	3	YGR021W	YGR021W	6340	19030	110	3157	2756	1818	50	94	338	86	77	0	7787	7313	5191	67	139	369	87	83	0	0.402	0.373	0.379	0.449	2.277	0.339	0.871	80	556	10827	9952	-1.313	3107	7720	2706	7246	0
5	21	3	YGR053C	YGR053C	6530	19020	110	1537	1787	1151	49	122	396	86	70	0	5681	5414	3913	69	303	1221	75	65	0	0.265	0.325	0.315	0.416	2.82	0.301	0.834	80	581	7100	7083	-1.915	1488	5612	1738	5345	0
5	1	4	FZF1	YGL254W	2540	19280	120	3256	4534	4035	45	61	133	90	85	0	2719	4545	4414	65	83	189	84	77	0	1.21	1.002	1.007	1.236	2.95	0.946	0.815	120	646	5865	8969	0.275	3211	2654	4489	4480	0
5	2	4	MTL1	YGR023W	2730	19270	110	9140	9890	6880	47	159	569	92	87	0	10220	12289	9293	66	242	953	81	80	0	0.896	0.805	0.75	0.933	3.115	0.749	0.797	80	528	19247	22066	-0.159	9093	10154	9843	12223	0
5	3	4	MUP1	YGR055W	2930	19270	110	1762	1939	1363	47	146	525	77	68	0	7514	7407	5483	67	272	965	80	75	0	0.23	0.258	0.27	0.317	2.563	0.231	0.814	80	562	9162	9232	-2.118	1715	7447	1892	7340	0
5	4	4	ADH4	YGL256W	3140	19270	110	3473	3388	2336	47	103	250	88	83	0	6689	5915	4461	66	200	571	81	73	0	0.517	0.571	0.603	0.863	4.134	0.517	0.79	80	549	10049	9190	-0.951	3426	6623	3341	5849	0
5	5	4	YGR025W	YGR025W	3330	19270	120	1044	1366	1192	46	103	264	70	60	0	1112	1717	1687	66	170	499	58	50	0	0.954	0.8	0.759	1.04	4.087	0.676	0.736	120	569	2044	2971	-0.068	998	1046	1320	1651	0
5	6	4	LST7	YGR057C	3530	19270	120	2360	3187	2754	46	87	194	87	78	0	2281	3648	3508	64	139	394	71	65	0	1.044	0.876	0.891	1.186	3.624	0.805	0.775	120	616	4531	6725	0.062	2314	2217	3141	3584	0
5	7	4	YGL258W	YGL258W	3730	19260	110	3091	3333	2308	47	120	330	88	80	0	4908	6094	4775	67	198	600	81	73	0	0.629	0.545	0.555	0.679	3.317	0.472	0.736	80	570	7885	9313	-0.669	3044	4841	3286	6027	0
5	8	4	RPS25A	YGR027C	3950	19260	110	1113	1214	871	47	130	355	75	61	0	1974	2881	2372	68	258	792	71	55	0	0.559	0.415	0.396	0.488	3.061	0.35	0.746	80	549	2972	3980	-0.838	1066	1906	1167	2813	0
5	9	4	SPR3	YGR059W	4130	19250	110	2181	2991	2153	48	119	309	86	82	0	4045	4948	4032	68	230	751	76	71	0	0.536	0.603	0.579	0.792	3.663	0.526	0.788	80	527	6110	7823	-0.899	2133	3977	2943	4880	0
5	10	4	PPA1	YHR026W	4340	19240	110	2513	3503	2993	49	132	370	91	80	0	3825	6071	5521	68	213	662	78	70	0	0.656	0.575	0.625	0.868	4.242	0.545	0.684	80	538	6221	9457	-0.609	2464	3757	3454	6003	0
5	11	4	YHR056C	YHR056C	4530	19250	110	2382	2679	1963	49	95	213	91	83	0	3660	4570	3840	68	164	459	80	73	0	0.649	0.584	0.588	0.732	3.595	0.483	0.612	80	533	5925	7132	-0.623	2333	3592	2630	4502	0
5	12	4	YHR087W	YHR087W	4750	19250	110	3317	3609	2714	49	215	1261	67	57	0	2896	3660	2922	68	220	1000	70	58	0	1.156	0.991	1.009	1.179	2.746	0.979	0.792	80	585	6096	7152	0.209	3268	2828	3560	3592	0
5	13	4	DAP2	YHR028C	4950	19240	110	1403	2278	1928	49	142	457	77	57	0	3342	4918	4565	68	194	588	75	62	0	0.414	0.46	0.446	0.567	3.362	0.415	0.782	80	559	4628	7079	-1.274	1354	3274	2229	4850	0
5	14	4	MED6	YHR058C	5140	19240	110	4567	4916	3499	48	153	517	91	83	0	6427	6753	5460	68	215	664	83	75	0	0.711	0.728	0.72	0.97	3.344	0.675	0.805	80	558	10878	11553	-0.493	4519	6359	4868	6685	0
5	15	4	GAR1	YHR089C	5340	19240	100	3848	3992	2827	50	154	534	81	75	0	5856	5615	4511	69	207	659	80	67	0	0.656	0.711	0.742	0.947	2.923	0.641	0.807	80	496	9585	9488	-0.608	3798	5787	3942	5546	0
5	16	4	SLT2	YHR030C	5540	19230	110	1645	1709	1303	50	111	264	82	66	0	6005	6516	5164	70	234	808	83	70	0	0.269	0.257	0.249	0.28	2.587	0.231	0.786	80	557	7530	8105	-1.896	1595	5935	1659	6446	0
5	17	4	VMA22	YHR060W	5730	19230	110	1080	1152	838	49	90	194	80	66	0	3669	4368	3464	71	212	742	78	68	0	0.287	0.257	0.253	0.314	3.883	0.228	0.807	80	574	4629	5400	-1.803	1031	3598	1103	4297	0
5	18	4	MSR1	YHR091C	5950	19230	110	3128	3726	2955	50	137	458	87	72	0	3808	4431	3667	70	199	606	78	66	0	0.823	0.843	0.841	1.037	3.103	0.817	0.812	80	557	6816	8037	-0.28	3078	3738	3676	4361	0
5	19	4	YHR032W	YHR032W	6140	19230	120	1343	1880	1644	49	156	494	65	53	0	1364	2710	2571	68	215	681	62	50	0	0.998	0.693	0.718	0.855	2.716	0.644	0.851	120	628	2590	4473	-0.002	1294	1296	1831	2642	0
5	20	4	RPP1	YHR062C	6340	19220	90	344	697	829	50	108	313	48	28	0	515	1144	1580	69	161	512	48	28	0	0.659	0.602	0.701	0.708	2.59	0.487	0.765	52	404	740	1722	-0.601	294	446	647	1075	0
5	21	4	AHT1	YHR093W	6540	19220	110	2451	2556	1931	50	112	308	86	73	0	5711	6604	5252	69	229	884	77	70	0	0.426	0.383	0.372	0.449	2.922	0.351	0.824	80	598	8043	9041	-1.233	2401	5642	2506	6535	0
5	1	5	PAN1	YIR006C	2560	19480	120	1524	2202	1963	46	59	89	90	82	0	2420	5534	5596	67	90	202	90	82	0	0.628	0.394	0.394	0.481	2.689	0.346	0.85	120	638	3831	7623	-0.671	1478	2353	2156	5467	0
5	2	5	GTT1	YIR038C	2750	19470	110	722	1662	1570	46	113	336	65	50	0	1812	3276	3271	66	207	665	61	53	0	0.387	0.503	0.511	0.681	3.945	0.456	0.814	80	540	2422	4826	-1.369	676	1746	1616	3210	0
5	3	5	RNR2	YJL026W	2940	19470	110	1058	1114	874	48	105	290	67	60	0	2227	3299	2954	65	208	708	68	60	0	0.467	0.33	0.324	0.405	2.937	0.284	0.775	80	548	3172	4300	-1.098	1010	2162	1066	3234	0
5	4	5	PRI1	YIR008C	3130	19470	110	2909	2874	2180	48	147	442	81	71	0	3817	4811	4323	67	266	915	66	58	0	0.763	0.596	0.593	0.957	3.997	0.509	0.822	80	556	6611	7570	-0.39	2861	3750	2826	4744	0
5	5	5	YIR040C	YIR040C	3350	19460	120	2670	4074	4024	47	183	580	71	59	0	3128	7724	8292	69	325	1222	66	53	0	0.857	0.526	0.525	0.735	3.735	0.476	0.848	120	626	5682	11682	-0.222	2623	3059	4027	7655	0
5	6	5	YJL028W	YJL028W	3550	19460	110	757	890	672	46	142	498	56	43	0	2266	2668	2150	67	303	1193	65	46	0	0.323	0.324	0.308	0.38	3.567	0.289	0.776	80	518	2910	3445	-1.629	711	2199	844	2601	0
5	7	5	YIR010W	YIR010W	3740	19460	110	1951	2018	1626	47	101	225	83	76	0	2641	3432	3208	68	197	599	73	63	0	0.74	0.586	0.653	0.739	3.035	0.499	0.76	80	558	4477	5335	-0.434	1904	2573	1971	3364	0
5	8	5	YIR042C	YIR042C	3940	19460	110	475	552	416	47	82	151	68	56	0	773	1015	887	68	124	264	60	55	0	0.607	0.533	0.538	0.619	2.714	0.458	0.79	80	550	1133	1452	-0.72	428	705	505	947	0
5	9	5	MAD2	YJL030W	4160	19460	120	1580	2324	2014	49	70	81	98	95	0	1717	3675	3651	69	110	186	94	86	0	0.929	0.631	0.591	0.749	2.513	0.554	0.824	120	640	3179	5881	-0.106	1531	1648	2275	3606	0
5	10	5	SQT1	YIR012W	4360	19450	120	4642	6835	6448	50	80	165	95	91	0	2785	4782	4585	69	110	202	86	76	0	1.691	1.44	1.439	1.659	2.963	1.465	0.845	120	596	7308	11498	0.758	4592	2716	6785	4713	0
5	11	5	YIR044C	YIR044C	4550	19450	120	1140	1567	1452	47	86	219	69	61	0	1199	2431	2394	69	132	352	69	60	0	0.967	0.644	0.629	0.729	2.973	0.593	0.781	120	603	2223	3882	-0.048	1093	1130	1520	2362	0
5	12	5	YJL032W	YJL032W	4750	19450	110	2174	2291	1847	47	168	557	67	57	0	1111	1616	1446	68	178	491	57	50	0	2.039	1.45	1.433	1.919	2.903	1.371	0.845	80	544	3170	3792	1.028	2127	1043	2244	1548	0
5	13	5	CAF17	YJR122W	4940	19440	100	811	949	736	48	160	528	58	43	0	1424	1625	1378	69	184	470	66	57	0	0.563	0.579	0.556	0.736	3.309	0.508	0.809	80	498	2118	2457	-0.829	763	1355	901	1556	0
5	14	5	YJR154W	YJR154W	5140	19440	110	1015	1233	1032	50	114	247	78	60	0	1628	1726	1538	69	192	463	67	55	0	0.619	0.714	0.716	0.961	3.378	0.648	0.846	80	576	2524	2840	-0.692	965	1559	1183	1657	0
5	15	5	YKL023W	YKL023W	5350	19440	110	1499	1603	1267	50	134	343	76	65	0	1820	2003	1720	69	197	519	66	56	0	0.828	0.803	0.789	0.966	2.545	0.74	0.8	80	576	3200	3487	-0.273	1449	1751	1553	1934	0
5	16	5	YJR124C	YJR124C	5550	19440	110	5117	6166	5140	49	165	520	81	71	0	4394	4744	4347	70	190	533	66	61	0	1.172	1.309	1.249	1.704	3.071	1.252	0.873	80	557	9392	10791	0.229	5068	4324	6117	4674	0
5	17	5	THI11	YJR156C	5740	19430	110	4610	4798	3871	50	236	698	78	66	0	5692	8259	7057	71	336	1055	77	72	0	0.811	0.58	0.593	0.724	2.978	0.538	0.82	80	558	10181	12936	-0.302	4560	5621	4748	8188	0
5	18	5	PAN3	YKL025C	5940	19430	100	2951	3828	3120	51	285	863	77	65	0	5220	6480	5556	71	520	1667	70	60	0	0.563	0.589	0.585	0.828	3.452	0.534	0.815	80	514	8049	10186	-0.828	2900	5149	3777	6409	0
5	19	5	YJR126C	YJR126C	6150	19430	110	3257	3015	2282	49	195	683	72	65	0	6295	5177	4284	70	367	1376	62	57	0	0.515	0.581	0.569	0.786	2.876	0.527	0.877	80	560	9433	8073	-0.956	3208	6225	2966	5107	0
5	20	5	HXT16	YJR158W	6370	19430	140	1133	4640	5795	50	119	416	66	51	0	1863	7475	9393	70	158	506	69	58	0	0.604	0.62	0.614	0.641	2.614	0.603	0.88	156	807	2876	11995	-0.727	1083	1793	4590	7405	0
5	21	5	YKL027W	YKL027W	6550	19420	100	1021	1190	978	50	150	595	60	43	0	2126	2253	1846	69	204	805	63	58	0	0.472	0.522	0.505	0.497	2.761	0.522	0.785	80	469	3028	3324	-1.083	971	2057	1140	2184	0
5	1	6	YJR128W	YJR128W	2550	19670	110	679	594	457	45	70	125	65	58	0	2619	2743	2348	67	182	569	65	58	0	0.248	0.205	0.198	0.237	3.617	0.185	0.798	80	563	3186	3225	-2.009	634	2552	549	2676	0
5	2	6	YJR160C	YJR160C	2750	19680	110	596	793	655	46	77	137	71	62	0	1593	2264	2221	69	204	591	56	52	0	0.361	0.34	0.332	0.358	3.182	0.273	0.764	80	566	2074	2942	-1.47	550	1524	747	2195	0
5	3	6	MAE1	YKL029C	2950	19670	110	753	773	571	47	62	73	81	72	0	4375	5154	4384	69	135	307	75	72	0	0.164	0.143	0.15	0.186	3.917	0.118	0.74	80	577	5012	5811	-2.609	706	4306	726	5085	0
5	4	6	SOF1	YLL011W	3170	19670	120	4079	6511	6022	46	64	77	97	90	0	4312	6304	6166	68	122	261	81	75	0	0.95	1.037	0.986	1.197	3.975	1.004	0.74	120	636	8277	12701	-0.074	4033	4244	6465	6236	0
5	5	6	FPS1	YLL043W	3350	19660	110	6212	5722	4698	46	92	251	87	80	0	8502	7875	6521	70	112	268	81	77	0	0.731	0.727	0.688	0.81	3.564	0.697	0.786	80	512	14598	13481	-0.452	6166	8432	5676	7805	0
5	6	6	YLR008C	YLR008C	3540	19660	110	2641	2648	2117	48	131	325	81	70	0	2943	2913	2453	70	156	338	71	67	0	0.903	0.915	0.933	1.01	3.98	0.878	0.69	80	566	5466	5443	-0.148	2593	2873	2600	2843	0
5	7	6	YLL013C	YLL013C	3750	19660	110	4348	5483	4564	49	133	326	81	73	0	4861	8337	7636	69	165	367	82	77	0	0.897	0.657	0.67	0.86	3.775	0.591	0.804	80	574	9091	13702	-0.157	4299	4792	5434	8268	0
5	8	6	RPL8B	YLL045C	3960	19650	120	992	1671	1560	47	84	216	72	62	0	2488	4617	4457	67	114	244	81	75	0	0.39	0.357	0.333	0.371	2.38	0.331	0.844	120	648	3366	6174	-1.357	945	2421	1624	4550	0
5	9	6	YLR010C	YLR010C	4160	19650	110	734	841	654	47	66	102	81	68	0	2389	2713	2316	67	144	487	67	62	0	0.296	0.3	0.298	0.404	4.122	0.257	0.755	80	516	3009	3440	-1.757	687	2322	794	2646	0
5	10	6	BPT1	YLL015W	4350	19650	100	875	1003	758	49	85	178	83	73	0	1638	2032	1685	70	191	619	71	58	0	0.527	0.486	0.44	0.543	2.819	0.433	0.815	80	478	2394	2916	-0.925	826	1568	954	1962	0
5	11	6	YLL047W	YLL047W	4540	19650	110	775	694	406	47	78	155	81	73	0	4495	3688	2716	70	187	534	72	68	0	0.165	0.179	0.178	0.237	2.867	0.153	0.788	80	561	5153	4265	-2.604	728	4425	647	3618	0
5	12	6	YLR012C	YLR012C	4760	19650	110	4798	4119	2851	49	166	608	80	72	0	3951	3242	2433	69	242	704	68	63	0	1.223	1.283	1.238	1.601	2.974	1.209	0.855	80	560	8631	7243	0.291	4749	3882	4070	3173	0
5	13	6	YLL017W	YLL017W	4950	19640	110	3951	3475	2259	49	253	794	73	68	0	4374	3665	2572	68	291	855	75	65	0	0.906	0.952	0.92	1.193	3.694	0.901	0.808	80	545	8208	7023	-0.142	3902	4306	3426	3597	0
5	14	6	YLL049W	YLL049W	5150	19640	110	2077	1920	1241	51	192	559	75	66	0	5433	4687	3327	70	323	907	73	68	0	0.378	0.405	0.385	0.518	3.916	0.372	0.812	80	563	7389	6486	-1.404	2026	5363	1869	4617	0
5	15	6	PPR1	YLR014C	5360	19640	110	9455	8064	5155	50	161	446	90	82	0	7451	6858	4962	71	260	757	80	72	0	1.274	1.181	1.136	1.578	3.43	1.137	0.807	80	566	16785	14801	0.35	9405	7380	8014	6787	0
5	16	6	YLR327C	YLR327C	5550	19630	110	1029	960	605	49	137	402	71	57	0	3014	2616	1891	71	182	435	73	68	0	0.333	0.358	0.326	0.428	3.164	0.355	0.675	80	548	3923	3456	-1.586	980	2943	911	2545	0
5	17	6	ADE13	YLR359W	5750	19630	100	2053	1888	1360	49	93	157	81	75	0	2837	2761	2181	71	158	309	72	70	0	0.725	0.684	0.653	0.804	2.822	0.627	0.826	80	507	4770	4529	-0.465	2004	2766	1839	2690	0
5	18	6	YLR391W	YLR391W	5950	19630	110	593	582	338	50	96	174	78	70	0	2440	2049	1522	71	192	498	70	63	0	0.229	0.269	0.255	0.311	3.08	0.234	0.783	80	566	2912	2510	-2.125	543	2369	532	1978	0
5	19	6	REC102	YLR329W	6160	19630	100	1550	1495	982	50	107	242	81	72	0	3930	3301	2431	72	240	669	75	65	0	0.389	0.448	0.438	0.539	2.656	0.402	0.86	80	483	5358	4674	-1.363	1500	3858	1445	3229	0
5	20	6	YLR361C	YLR361C	6350	19630	100	1168	1129	784	52	139	443	66	53	0	1953	1826	1501	73	189	572	61	57	0	0.594	0.614	0.637	0.899	3.341	0.542	0.851	80	458	2996	2830	-0.752	1116	1880	1077	1753	0
5	21	6	ATP10	YLR393W	6550	19620	110	913	884	576	50	90	263	77	65	0	3294	3404	2575	72	155	415	80	72	0	0.268	0.25	0.245	0.292	2.757	0.214	0.803	80	578	4085	4166	-1.901	863	3222	834	3332	0
5	1	7	YLR331C	YLR331C	2560	19870	110	4291	3401	2369	46	112	330	81	75	0	5784	5572	4006	68	191	602	78	76	0	0.743	0.61	0.587	0.751	2.935	0.58	0.883	80	591	9961	8859	-0.429	4245	5716	3355	5504	0
5	2	7	NMD4	YLR363C	2760	19870	110	997	856	568	47	136	362	71	57	0	3552	2899	2065	72	257	730	72	62	0	0.273	0.286	0.269	0.293	2.561	0.272	0.835	80	567	4430	3636	-1.873	950	3480	809	2827	0
5	3	7	COX8	YLR395C	2970	19870	110	2139	2326	1776	46	111	263	77	70	0	3724	3487	2752	69	208	583	68	65	0	0.573	0.667	0.717	0.92	3.724	0.649	0.851	80	577	5748	5698	-0.804	2093	3655	2280	3418	0
5	4	7	RPS25B	YLR333C	3170	19870	110	1414	1227	764	46	100	240	82	72	0	4318	3185	2155	67	186	516	80	70	0	0.322	0.379	0.38	0.483	3.519	0.334	0.811	80	544	5619	4299	-1.636	1368	4251	1181	3118	0
5	5	7	YLR365W	YLR365W	3360	19870	100	1403	1194	715	47	98	236	81	75	0	4649	3462	2331	68	260	851	73	66	0	0.296	0.338	0.339	0.469	3.311	0.3	0.863	80	489	5937	4541	-1.756	1356	4581	1147	3394	0
5	6	7	AFG2	YLR397C	3550	19860	110	6733	5632	3610	48	122	289	93	90	0	9420	7640	5188	69	247	784	83	76	0	0.715	0.738	0.761	0.951	2.891	0.695	0.826	80	567	16036	13155	-0.484	6685	9351	5584	7571	0
5	7	7	YMR097C	YMR097C	3760	19860	110	3407	3629	2589	47	104	239	88	81	0	5314	5066	3929	69	154	390	80	73	0	0.641	0.717	0.714	1.086	3.872	0.674	0.878	80	574	8605	8579	-0.642	3360	5245	3582	4997	0
5	8	7	ECM16	YMR128W	3970	19860	100	1260	1222	804	47	67	132	87	81	0	4098	3616	2700	67	102	265	80	77	0	0.301	0.331	0.332	0.445	3.787	0.293	0.844	80	494	5244	4724	-1.733	1213	4031	1175	3549	0
5	9	7	YMR158W	YMR158W	4160	19850	110	1168	1021	674	47	57	57	85	77	0	4619	4087	2920	66	116	275	80	73	0	0.246	0.242	0.223	0.239	2.575	0.217	0.819	80	558	5674	4995	-2.022	1121	4553	974	4021	0
5	10	7	YMR099C	YMR099C	4350	19850	110	1255	1128	763	47	70	122	83	81	0	4596	4427	3415	67	158	442	77	72	0	0.267	0.248	0.246	0.318	3.084	0.223	0.856	80	566	5737	5441	-1.907	1208	4529	1081	4360	0
5	11	7	YMR130W	YMR130W	4560	19850	100	1296	1344	1036	47	74	144	81	72	0	2209	2495	2109	68	152	457	70	66	0	0.583	0.534	0.573	0.602	2.61	0.481	0.851	80	515	3390	3724	-0.778	1249	2141	1297	2427	0
5	12	7	APG16	YMR159C	4770	19850	120	535	638	518	46	75	173	66	53	0	2282	3127	2855	68	116	293	72	67	0	0.221	0.194	0.189	0.266	3.038	0.172	0.878	120	629	2703	3651	-2.179	489	2214	592	3059	0
5	13	7	SRT1	YMR101C	4970	19840	120	1573	2151	1905	47	82	179	77	71	0	1397	2329	2257	66	122	286	69	60	0	1.147	0.93	0.902	1.143	3.379	0.872	0.829	120	598	2857	4367	0.197	1526	1331	2104	2263	0
5	14	7	YMR132C	YMR132C	5170	19840	120	759	1161	1085	48	76	137	72	65	0	1687	2742	2856	67	133	380	64	55	0	0.439	0.416	0.396	0.552	3.497	0.375	0.867	120	603	2331	3788	-1.188	711	1620	1113	2675	0
5	15	7	HLJ1	YMR161W	5360	19840	100	521	696	668	49	60	65	85	75	0	492	945	1247	68	96	228	65	46	0	1.113	0.738	0.916	1.021	3.086	0.567	0.785	80	490	896	1524	0.155	472	424	647	877	0
5	16	7	YMR103C	YMR103C	5580	19840	120	404	534	440	48	55	46	85	75	0	1252	1825	1625	68	81	101	85	76	0	0.301	0.277	0.25	0.312	2.93	0.253	0.837	120	660	1540	2243	-1.734	356	1184	486	1757	0
5	17	7	YMR134W	YMR134W	5770	19830	110	2897	2332	1582	48	80	193	85	76	0	6799	6173	4607	69	148	569	80	75	0	0.423	0.374	0.368	0.523	3.376	0.341	0.833	80	542	9579	8388	-1.24	2849	6730	2284	6104	0
5	18	7	YMR163C	YMR163C	5970	19820	110	1289	1185	861	49	87	203	76	66	0	4978	4080	3091	69	185	632	75	63	0	0.253	0.283	0.287	0.317	2.212	0.273	0.871	80	552	6149	5147	-1.985	1240	4909	1136	4011	0
5	19	7	YNL144C	YNL144C	6170	19820	120	1872	3139	2803	48	79	150	93	84	0	4993	7697	7152	70	147	409	80	75	0	0.371	0.405	0.414	0.556	2.932	0.384	0.909	120	623	6747	10718	-1.432	1824	4923	3091	7627	0
5	20	7	YNL176C	YNL176C	6370	19810	110	3992	3936	3084	50	80	131	93	85	0	11535	12477	10297	72	163	403	87	82	0	0.344	0.313	0.313	0.367	2.434	0.303	0.876	80	540	15405	16291	-1.54	3942	11463	3886	12405	0
5	21	7	YNL208W	YNL208W	6580	19820	120	1869	1958	1378	49	72	104	94	86	0	2981	3040	2210	69	139	304	85	77	0	0.625	0.643	0.629	0.725	2.458	0.612	0.862	120	674	4732	4880	-0.678	1820	2912	1909	2971	0
5	1	8	YNL146W	YNL146W	2580	20070	110	580	543	388	45	62	106	70	62	0	2791	2486	1759	68	112	266	77	71	0	0.196	0.206	0.192	0.25	3.337	0.197	0.781	80	564	3258	2916	-2.348	535	2723	498	2418	0
5	2	8	RPS3	YNL178W	2780	20070	110	2352	2308	1638	45	68	107	88	83	0	4178	3673	2713	70	123	247	80	75	0	0.562	0.628	0.622	0.767	3.096	0.617	0.792	80	549	6415	5866	-0.832	2307	4108	2263	3603	0
5	3	8	MER1	YNL210W	2970	20070	110	1754	1494	1012	47	81	167	80	73	0	5361	4701	3576	68	135	336	77	73	0	0.323	0.312	0.298	0.37	3.337	0.283	0.819	80	552	7000	6080	-1.633	1707	5293	1447	4633	0
5	4	8	ALF1	YNL148C	3180	20070	110	578	560	369	46	68	125	83	65	0	2954	2502	2087	67	141	368	66	62	0	0.184	0.211	0.22	0.338	3.595	0.179	0.803	80	566	3419	2949	-2.44	532	2887	514	2435	0
5	5	8	RHO5	YNL180C	3380	20060	100	2568	2348	1525	47	70	95	92	85	0	9215	7390	5125	67	161	410	80	77	0	0.276	0.314	0.313	0.411	3.14	0.289	0.861	80	499	11669	9624	-1.859	2521	9148	2301	7323	0
5	6	8	YNL212W	YNL212W	3570	20060	100	176	370	539	47	67	91	68	27	0	399	773	1168	69	135	355	47	20	0	0.391	0.459	0.403	0.432	2.426	0.398	0.695	80	507	459	1027	-1.355	129	330	323	704	0
5	7	8	YNL150W	YNL150W	3780	20050	110	1515	1186	839	47	78	149	75	70	0	4639	3998	2990	71	166	524	75	70	0	0.321	0.29	0.271	0.321	3.426	0.258	0.79	80	554	6036	5066	-1.638	1468	4568	1139	3927	0
5	8	8	YNL182C	YNL182C	3980	20060	120	1959	2422	1939	46	72	138	93	85	0	5366	6518	5376	69	156	501	83	81	0	0.361	0.368	0.362	0.42	2.613	0.338	0.832	120	624	7210	8825	-1.469	1913	5297	2376	6449	0
5	9	8	PEX17	YNL214W	4180	20060	110	4061	3326	2441	46	67	118	91	85	0	4271	4732	3802	68	123	331	75	73	0	0.955	0.703	0.698	0.993	3.585	0.644	0.845	80	532	8218	7944	-0.066	4015	4203	3280	4664	0
5	10	8	MSB4	YOL112W	4360	20050	100	745	915	804	47	92	188	78	63	0	2310	2602	2465	67	212	675	65	60	0	0.311	0.342	0.3	0.382	3.356	0.258	0.658	80	495	2941	3403	-1.684	698	2243	868	2535	0
5	11	8	NOP8	YOL144W	4570	20050	100	1388	1475	1219	48	76	143	78	70	0	3508	4157	3711	67	189	647	70	62	0	0.389	0.349	0.331	0.455	3.448	0.307	0.777	80	497	4781	5517	-1.361	1340	3441	1427	4090	0
5	12	8	TIR2	YOR010C	4760	20050	100	1244	1286	979	46	87	272	71	66	0	1744	1959	1779	68	173	640	62	56	0	0.715	0.656	0.662	0.826	3.108	0.54	0.79	80	486	2874	3131	-0.484	1198	1676	1240	1891	0
5	13	8	YOL114C	YOL114C	4970	20040	100	930	896	652	48	88	271	67	61	0	2743	2452	1989	70	166	601	67	60	0	0.33	0.356	0.352	0.439	3.359	0.316	0.817	80	494	3555	3230	-1.6	882	2673	848	2382	0
5	14	8	YOL146W	YOL146W	5160	20040	110	746	799	602	49	69	108	80	71	0	2546	3314	2936	70	161	517	70	62	0	0.282	0.231	0.233	0.292	3.122	0.199	0.841	80	531	3173	3994	-1.829	697	2476	750	3244	0
5	15	8	YOR012W	YOR012W	5360	20040	110	559	578	432	48	81	176	66	56	0	2354	2526	2145	70	205	693	63	56	0	0.224	0.216	0.218	0.27	3.582	0.207	0.843	80	576	2795	2986	-2.16	511	2284	530	2456	0
5	16	8	MSN1	YOL116W	5570	20040	110	1210	1162	927	47	81	184	71	68	0	3583	3574	3232	69	180	612	63	58	0	0.331	0.318	0.313	0.416	3.944	0.278	0.792	80	542	4677	4620	-1.595	1163	3514	1115	3505	0
5	17	8	SPT20	YOL148C	5760	20030	100	937	1047	817	49	93	212	72	66	0	1815	2720	2456	69	199	637	70	53	0	0.509	0.376	0.37	0.406	3.115	0.325	0.826	80	497	2634	3649	-0.975	888	1746	998	2651	0
5	18	8	RTS1	YOR014W	5970	20030	110	909	928	745	50	82	180	76	63	0	1914	2105	1792	69	161	529	67	61	0	0.466	0.431	0.418	0.545	3.484	0.379	0.753	80	584	2704	2914	-1.103	859	1845	878	2036	0
5	19	8	YOL118C	YOL118C	6170	20020	110	199	202	120	48	62	71	65	52	0	1749	1905	1602	70	121	240	70	65	0	0.09	0.084	0.087	0.137	3.858	0.07	0.789	80	542	1830	1989	-3.475	151	1679	154	1835	0
5	20	8	YOL150C	YOL150C	6360	20020	100	600	582	396	48	72	107	75	67	0	895	965	739	70	139	289	68	58	0	0.669	0.597	0.599	0.642	2.577	0.495	0.825	80	498	1377	1429	-0.58	552	825	534	895	0
5	21	8	ERP4	YOR016C	6560	20020	100	4616	4648	3381	48	104	262	88	80	0	6052	5711	4427	70	156	407	77	75	0	0.764	0.815	0.832	1.073	2.888	0.774	0.85	80	501	10550	10241	-0.389	4568	5982	4600	5641	0
5	1	9	SCD5	YOR329C	2570	20260	130	4318	6769	6206	46	71	191	95	90	0	3735	5915	5633	66	106	258	82	78	0	1.164	1.149	1.126	1.394	2.65	1.135	0.858	120	758	7941	12572	0.22	4272	3669	6723	5849	0
5	2	9	PRT1	YOR361C	2760	20260	110	1714	1912	1523	47	92	241	72	67	0	5044	5262	4245	68	129	294	78	75	0	0.335	0.359	0.374	0.393	2.398	0.344	0.846	80	528	6643	7059	-1.578	1667	4976	1865	5194	0
5	3	9	ERR1	YOR393W	2970	20270	120	4727	6347	5207	46	64	118	99	94	0	5674	7817	6955	67	99	207	89	81	0	0.835	0.813	0.824	1.03	2.897	0.761	0.857	120	634	10288	14051	-0.26	4681	5607	6301	7750	0
5	4	9	YOR331C	YOR331C	3170	20260	110	957	1141	839	45	68	134	80	72	0	3977	4493	3616	67	140	427	80	71	0	0.233	0.248	0.249	0.298	2.187	0.228	0.873	80	543	4822	5522	-2.1	912	3910	1096	4426	0
5	5	9	PIP2	YOR363C	3360	20270	110	1621	1587	1194	46	63	82	83	80	0	3014	3618	3263	66	136	410	73	65	0	0.534	0.434	0.425	0.535	2.234	0.377	0.854	80	526	4523	5093	-0.904	1575	2948	1541	3552	0
5	6	9	HAT1	YPL001W	3560	20260	100	3216	3453	2686	48	71	160	86	82	0	1639	1674	1378	65	81	110	75	72	0	2.013	2.116	2.165	2.217	2.64	2.16	0.823	80	508	4742	5014	1.009	3168	1574	3405	1609	0
5	7	9	YOR333C	YOR333C	3760	20250	110	1399	1246	872	47	124	407	68	60	0	4242	3845	2819	68	225	805	73	67	0	0.324	0.317	0.316	0.342	2.497	0.338	0.776	80	541	5526	4976	-1.626	1352	4174	1199	3777	0
5	8	9	YOR365C	YOR365C	3960	20250	110	1519	1663	1218	46	111	390	77	65	0	4380	4804	3855	67	243	827	75	66	0	0.342	0.341	0.328	0.41	2.271	0.308	0.869	80	514	5786	6354	-1.55	1473	4313	1617	4737	0
5	9	9	ULA1	YPL003W	4160	20250	100	6071	6278	4723	48	145	526	83	77	0	3944	4551	3658	71	206	788	72	68	0	1.555	1.391	1.358	1.736	2.737	1.26	0.809	80	475	9896	10710	0.637	6023	3873	6230	4480	0
5	10	9	ALA1	YOR335C	4360	20250	110	5031	4187	2898	50	213	749	77	71	0	8325	8421	6348	69	333	1351	76	66	0	0.603	0.495	0.49	0.602	2.299	0.466	0.893	80	549	13237	12489	-0.729	4981	8256	4137	8352	0
5	11	9	SCP1	YOR367W	4570	20240	110	1187	1216	932	48	141	568	65	50	0	3646	3735	2921	68	266	1152	70	60	0	0.318	0.319	0.334	0.37	2.732	0.318	0.862	80	574	4717	4835	-1.651	1139	3578	1168	3667	0
5	12	9	YPL005W	YPL005W	4760	20240	110	1251	1554	1242	47	71	118	81	75	0	940	1026	875	67	113	251	68	57	0	1.379	1.571	1.6	1.514	2.352	1.471	0.829	80	575	2077	2466	0.464	1204	873	1507	959	0
5	13	9	VMA13	YPR036W	4970	20240	110	1123	1192	855	48	75	165	82	77	0	4675	4342	3447	70	117	354	76	71	0	0.233	0.268	0.274	0.352	2.587	0.256	0.853	80	547	5680	5416	-2.099	1075	4605	1144	4272	0
5	14	9	HOS1	YPR068C	5180	20240	120	3090	3585	3047	50	72	141	91	83	0	5216	6814	6072	72	124	353	85	77	0	0.591	0.524	0.53	0.611	2.415	0.495	0.891	120	570	8184	10277	-0.759	3040	5144	3535	6742	0
5	15	9	YPR100W	YPR100W	5360	20240	110	2194	2116	1641	50	160	604	66	61	0	3746	4262	3641	70	317	1327	62	55	0	0.583	0.493	0.496	0.664	3.233	0.449	0.908	80	483	5820	6258	-0.778	2144	3676	2066	4192	0
5	16	9	YPR038W	YPR038W	5570	20230	110	1647	1518	1062	50	157	563	67	58	0	5128	5348	3883	71	352	1301	75	68	0	0.316	0.278	0.284	0.306	2.311	0.258	0.858	80	567	6654	6745	-1.663	1597	5057	1468	5277	0
5	17	9	MED1	YPR070W	5770	20220	110	1548	2266	1886	49	83	152	90	82	0	4063	5600	4697	70	188	549	83	73	0	0.375	0.401	0.397	0.456	2.594	0.383	0.856	80	567	5492	7747	-1.413	1499	3993	2217	5530	0
5	18	9	RPL11A	YPR102C	5970	20230	110	2125	2308	1825	49	102	274	77	71	0	4309	5177	4401	70	215	765	68	62	0	0.49	0.442	0.447	0.573	2.748	0.406	0.908	80	567	6315	7366	-1.03	2076	4239	2259	5107	0
5	19	9	YPR040W	YPR040W	6180	20230	120	2685	3670	3152	50	105	305	85	74	0	4509	6530	5919	70	199	751	80	65	0	0.594	0.56	0.566	0.76	2.772	0.521	0.894	120	673	7074	10080	-0.752	2635	4439	3620	6460	0
5	20	9	NOT5	YPR072W	6390	20210	110	1449	2801	2818	49	90	224	88	80	0	2432	4871	5023	69	145	481	81	68	0	0.592	0.573	0.55	0.66	2.287	0.547	0.896	80	558	3763	7554	-0.755	1400	2363	2752	4802	0
5	21	9	FHL1	YPR104C	6580	20210	110	2406	3047	2643	50	82	153	83	77	0	4320	5756	5325	73	123	272	81	77	0	0.555	0.527	0.508	0.636	2.747	0.487	0.881	80	560	6603	8680	-0.85	2356	4247	2997	5683	0
5	1	10	YPR042C	YPR042C	2580	20470	90	102	233	403	45	46	13	82	69	0	147	422	857	67	78	184	25	21	0	0.712	0.53	0.504	0.605	3.639	0.39	0.692	52	409	137	543	-0.489	57	80	188	355	0
5	2	10	TKL1	YPR074C	2770	20460	110	1590	1729	1351	47	69	111	85	77	0	3983	4572	3770	68	125	307	75	73	0	0.394	0.373	0.371	0.43	2.531	0.345	0.823	80	568	5458	6186	-1.343	1543	3915	1682	4504	0
5	3	10	ISR1	YPR106W	2970	20460	110	1127	1034	772	47	78	149	75	67	0	4922	5012	4006	70	150	337	78	73	0	0.223	0.2	0.199	0.243	3.661	0.182	0.836	80	549	5932	5929	-2.168	1080	4852	987	4942	0
5	4	10	EMPTY	EMPTY	3180	20470	100	117	203	279	45	54	41	60	48	0	225	571	849	69	108	203	42	31	0	0.462	0.315	0.315	0.384	3.104	0.274	0.693	80	449	228	660	-1.115	72	156	158	502	0
5	5	10	EMPTY	EMPTY	3360	20460	150	50	60	36	45	57	65	5	1	0	74	86	63	67	111	305	1	0	0	0.714	0.789	0.556	0.461	3.947	0.205	0.351	156	762	12	34	-0.485	5	7	15	19	-50
5	6	10	EMPTY	EMPTY	3570	20460	100	85	190	330	46	47	12	75	62	0	156	363	756	65	64	22	73	68	0	0.429	0.483	0.439	0.459	2.99	0.377	0.643	80	452	130	442	-1.222	39	91	144	298	0
5	7	10	EMPTY	EMPTY	3760	20450	150	52	95	191	46	95	334	3	1	0	75	143	365	67	167	661	3	1	0	0.75	0.645	0.541	0.589	3.917	0.477	0.617	156	761	14	125	-0.415	6	8	49	76	-50
5	8	10	EMPTY	EMPTY	3960	20450	150	48	120	318	46	76	195	5	4	0	70	171	546	68	149	493	4	3	0	1	0.718	0.667	0.649	3.774	0.53	0.683	156	730	4	177	0	2	2	74	103	-50
5	9	10	EMPTY	EMPTY	4160	20450	150	50	82	166	46	104	420	1	1	0	73	121	260	68	146	633	3	0	0	0.8	0.679	0.518	0.572	3.772	0.567	0.526	156	717	9	89	-0.322	4	5	36	53	-50
5	10	10	EMPTY	EMPTY	4360	20450	150	49	57	36	47	123	507	0	0	0	71	88	100	68	192	962	0	0	0	0.667	0.5	0.414	0.434	3.996	0.247	0.299	156	797	5	30	-0.585	2	3	10	20	-50
5	11	10	EMPTY	EMPTY	4590	20450	80	62	75	39	45	46	11	57	42	0	90	109	80	67	66	19	53	40	0	0.739	0.714	0.435	0.424	2.88	0.396	0.384	52	340	40	72	-0.436	17	23	30	42	0
5	12	10	EMPTY	EMPTY	4800	20450	90	86	192	318	46	48	11	76	61	0	110	259	397	67	67	20	57	51	0	0.93	0.76	0.534	0.578	3.863	0.733	0.555	52	344	83	338	-0.104	40	43	146	192	0
5	13	10	EMPTY	EMPTY	4960	20440	150	54	100	148	49	65	123	9	6	0	71	154	353	69	97	281	7	4	0	2.5	0.6	0.542	0.571	4.016	0.362	0.62	156	860	7	136	1.322	5	2	51	85	-50
5	14	10	EMPTY	EMPTY	5220	20400	110	138	208	184	50	60	54	62	43	0	198	366	433	72	85	91	57	42	0	0.698	0.537	0.665	0.73	3.037	0.554	0.6	80	425	214	452	-0.518	88	126	158	294	0
5	15	10	EMPTY	EMPTY	5360	20430	150	58	89	88	52	125	475	0	0	0	84	130	165	77	232	1034	0	0	0	0.857	0.698	0.667	0.685	3.049	0.501	0.619	156	787	13	90	-0.222	6	7	37	53	-50
5	16	10	iYAL056W	iYAL056W	5600	20440	120	1966	3411	3500	52	75	148	89	80	0	1072	1720	1770	75	127	346	62	55	0	1.92	2.042	2.08	2.346	2.907	2.086	0.837	120	624	2911	5004	0.941	1914	997	3359	1645	0
5	17	10	iYAL051W	iYAL051W	5780	20430	100	733	1040	1276	49	78	241	81	65	0	706	833	837	69	91	219	67	55	0	1.074	1.297	1.239	1.418	2.528	1.6	0.841	80	487	1321	1755	0.103	684	637	991	764	0
5	18	10	iYAL046C	iYAL046C	5990	20430	100	328	384	334	48	72	193	58	33	0	713	1129	1020	68	100	230	65	53	0	0.434	0.317	0.258	0.365	3.188	0.307	0.564	80	515	925	1397	-1.204	280	645	336	1061	0
5	19	10	iYAL031C	iYAL031C	6190	20430	110	1592	1815	1448	49	106	350	71	67	0	3321	3298	2771	70	174	658	71	61	0	0.475	0.547	0.557	0.715	2.819	0.51	0.893	80	533	4794	4994	-1.075	1543	3251	1766	3228	0
5	20	10	iYAL027W	iYAL027W	6370	20420	110	2049	2393	1675	50	149	439	86	73	0	1334	1627	1223	70	212	713	65	47	0	1.581	1.505	1.428	1.639	2.259	1.279	0.718	80	572	3263	3900	0.661	1999	1264	2343	1557	0
5	21	10	iYAL023C	iYAL023C	6600	20420	120	784	1095	1206	49	92	260	65	55	0	1430	2424	2542	69	119	315	72	64	0	0.54	0.444	0.401	0.519	2.819	0.429	0.855	120	685	2096	3401	-0.889	735	1361	1046	2355	0
5	1	11	iYAL007C	iYAL007C	2600	20670	120	1994	3051	2734	45	47	17	100	100	0	1851	2968	2695	65	72	124	87	80	0	1.091	1.035	1.036	1.21	2.615	1.026	0.857	120	675	3735	5909	0.126	1949	1786	3006	2903	0
5	2	11	iYAL003W	iYAL003W	2800	20670	120	1411	1935	1731	46	54	45	95	91	0	2171	3461	3291	66	73	67	89	83	0	0.648	0.556	0.531	0.696	3.378	0.514	0.833	120	592	3470	5284	-0.625	1365	2105	1889	3395	0
5	3	11	iYAR002W	iYAR002W	3000	20670	120	2092	2761	2389	45	51	43	98	92	0	1003	1556	1407	66	70	54	78	77	0	2.185	1.823	1.814	2.043	2.601	1.833	0.862	120	599	2984	4206	1.127	2047	937	2716	1490	0
5	4	11	itL(CAA)A	itL(CAA)A	3200	20660	120	761	1525	1489	45	49	40	91	85	0	1772	3040	3035	67	67	29	88	86	0	0.42	0.498	0.52	0.627	3.372	0.467	0.835	120	577	2421	4453	-1.252	716	1705	1480	2973	0
5	5	11	iYAR028W	iYAR028W	3400	20660	120	1253	1787	1361	44	47	17	100	98	0	1369	1813	1436	68	67	29	96	93	0	0.929	0.999	1.026	1.163	2.22	0.977	0.861	120	566	2510	3488	-0.106	1209	1301	1743	1745	0
5	6	11	iYAR035W	iYAR035W	3600	20660	120	460	735	724	45	47	15	98	96	0	1035	1652	1640	66	66	24	90	89	0	0.428	0.435	0.407	0.502	2.579	0.413	0.847	120	599	1384	2276	-1.223	415	969	690	1586	0
5	7	11	iYBR162C	iYBR162C	3800	20650	110	373	393	268	46	50	25	96	85	0	1369	1769	1413	66	82	128	77	73	0	0.251	0.204	0.226	0.303	3.321	0.178	0.816	80	519	1630	2050	-1.994	327	1303	347	1703	0
5	8	11	iYBR165W	iYBR165W	3990	20650	100	179	203	135	45	52	32	76	63	0	399	397	318	68	92	142	58	51	0	0.405	0.48	0.466	0.426	2.529	0.393	0.748	80	484	465	487	-1.305	134	331	158	329	0
5	9	11	iYBR169C	iYBR169C	4210	20650	120	395	448	328	46	49	21	90	86	0	1204	1760	1436	68	73	59	87	82	0	0.307	0.238	0.231	0.274	2.564	0.215	0.836	120	604	1485	2094	-1.703	349	1136	402	1692	0
5	10	11	iYBR187W	iYBR187W	4410	20650	120	1161	1677	1454	46	50	33	98	95	0	1136	1849	1725	68	67	22	90	89	0	1.044	0.916	0.919	1.079	2.528	0.877	0.856	120	571	2183	3412	0.062	1115	1068	1631	1781	0
5	11	11	iYBR192W	iYBR192W	4590	20640	110	1208	1295	1005	47	68	106	83	77	0	1689	2053	1719	68	98	177	76	68	0	0.716	0.629	0.605	0.768	3.175	0.571	0.813	80	535	2782	3233	-0.482	1161	1621	1248	1985	0
5	12	11	iYBR196C	iYBR196C	4800	20640	120	603	796	650	47	64	97	81	74	0	2048	3374	3116	70	96	170	85	82	0	0.281	0.227	0.213	0.275	3.02	0.197	0.819	120	623	2534	4053	-1.831	556	1978	749	3304	0
5	13	11	iYBRCdelta19	iYBRCdelta19	5000	20640	120	652	885	771	47	53	47	89	83	0	1631	2781	2690	68	76	106	86	83	0	0.387	0.309	0.291	0.341	2.969	0.274	0.835	120	576	2168	3551	-1.369	605	1563	838	2713	0
5	14	11	iYBR212W	iYBR212W	5190	20630	110	776	882	699	48	64	84	82	73	0	2496	2962	2665	69	126	357	65	58	0	0.3	0.288	0.302	0.409	3.624	0.253	0.803	80	563	3155	3727	-1.737	728	2427	834	2893	0
5	15	11	iYBR216C	iYBR216C	5380	20630	110	1638	1491	1170	49	109	224	76	63	0	1592	2087	1916	75	260	1008	53	47	0	1.047	0.717	0.743	0.921	2.866	0.594	0.799	80	549	3106	3454	0.067	1589	1517	1442	2012	0
5	16	11	iYBR237W	iYBR237W	5600	20640	120	1870	2463	2114	48	92	205	88	78	0	1591	2283	2103	70	147	383	74	65	0	1.198	1.091	1.091	1.267	2.668	1.047	0.798	120	606	3343	4628	0.261	1822	1521	2415	2213	0
5	17	11	iYBR241C	iYBR241C	5800	20630	110	934	935	678	46	57	54	90	78	0	1645	1714	1313	69	94	211	78	71	0	0.563	0.54	0.538	0.569	3.059	0.498	0.828	80	556	2464	2534	-0.828	888	1576	889	1645	0
5	18	11	iYBR246W	iYBR246W	6000	20630	110	1609	1503	1069	47	63	76	93	87	0	1349	1513	1150	69	103	223	81	70	0	1.22	1.008	0.972	1.102	2.708	0.964	0.792	80	578	2842	2900	0.287	1562	1280	1456	1444	0
5	19	11	iYDL140C	iYDL140C	6210	20630	100	244	236	119	47	56	56	80	67	0	1342	1445	1035	68	82	97	87	81	0	0.155	0.137	0.14	0.185	3.148	0.104	0.7	80	478	1471	1566	-2.693	197	1274	189	1377	0
5	20	11	iYDL136W	iYDL136W	6380	20620	110	2330	2258	1684	49	99	211	81	76	0	1960	2080	1631	68	122	245	75	71	0	1.206	1.098	1.052	1.075	2.765	1.059	0.818	80	549	4173	4221	0.27	2281	1892	2209	2012	0
5	21	11	iYDL133W	iYDL133W	6600	20620	100	294	335	190	48	86	192	67	26	0	647	753	535	68	113	225	71	58	0	0.425	0.419	0.422	0.489	2.365	0.338	0.704	80	486	825	972	-1.235	246	579	287	685	0
5	1	12	iYDL117W	iYDL117W	2600	20870	110	562	620	473	44	52	54	83	72	0	986	1466	1284	67	84	144	72	68	0	0.564	0.412	0.4	0.499	3.009	0.355	0.803	80	583	1437	1975	-0.827	518	919	576	1399	0
5	2	12	iYDL113C	iYDL113C	2810	20870	120	186	250	175	44	52	54	72	58	0	711	1267	1175	67	84	142	75	68	0	0.22	0.172	0.17	0.221	3.346	0.139	0.768	120	605	786	1406	-2.181	142	644	206	1200	0
5	3	12	iYDL109C	iYDL109C	2990	20860	110	257	288	185	45	48	18	92	86	0	1130	1349	1001	66	79	97	86	82	0	0.199	0.189	0.196	0.251	2.902	0.173	0.772	80	508	1276	1526	-2.327	212	1064	243	1283	0
5	4	12	iYDL090C	iYDL090C	3190	20860	110	644	655	456	47	57	55	91	81	0	2100	2115	1705	68	116	247	76	70	0	0.294	0.297	0.315	0.39	2.699	0.255	0.817	80	570	2629	2655	-1.767	597	2032	608	2047	0
5	5	12	iYDL086W	iYDL086W	3400	20860	110	682	688	473	47	62	67	85	82	0	1492	1734	1429	69	127	272	71	66	0	0.446	0.385	0.35	0.509	2.738	0.325	0.78	80	520	2058	2306	-1.164	635	1423	641	1665	0
5	6	12	iYDL082W	iYDL082W	3580	20860	120	761	859	624	46	56	54	95	86	0	820	886	697	68	91	151	76	63	0	0.951	0.994	0.936	1.057	2.111	0.903	0.816	120	584	1467	1631	-0.073	715	752	813	818	0
5	7	12	iYDL065C	iYDL065C	3790	20860	120	816	879	621	44	49	40	92	84	0	1052	1262	990	66	76	103	82	77	0	0.783	0.698	0.678	0.733	2.552	0.63	0.886	120	589	1758	2031	-0.353	772	986	835	1196	0
5	8	12	iYDL060W	iYDL060W	3980	20860	120	385	458	327	45	46	12	97	95	0	945	1155	934	66	67	52	87	85	0	0.387	0.379	0.393	0.446	2.655	0.335	0.848	120	588	1219	1502	-1.37	340	879	413	1089	0
5	9	12	iYDL056W	iYDL056W	4170	20850	110	904	829	544	46	59	77	88	80	0	682	657	440	68	80	84	77	70	0	1.397	1.329	1.325	1.513	2.261	1.3	0.859	80	522	1472	1372	0.483	858	614	783	589	0
5	10	12	iYDRWdelta12	iYDRWdelta12	4360	20850	100	1274	1137	708	47	100	217	78	73	0	1946	1743	1339	72	149	368	70	62	0	0.655	0.652	0.617	0.833	2.198	0.574	0.843	80	503	3101	2761	-0.611	1227	1874	1090	1671	0
5	11	12	iYDR244W	iYDR244W	4570	20850	110	376	378	226	47	84	190	71	45	0	1465	1375	885	69	138	358	82	66	0	0.236	0.253	0.232	0.273	2.284	0.235	0.799	80	587	1725	1637	-2.085	329	1396	331	1306	0
5	12	12	iYDR248C	iYDR248C	4770	20840	110	1405	1277	910	48	81	185	80	68	0	1910	1716	1280	69	124	305	76	66	0	0.737	0.746	0.706	0.878	2.809	0.708	0.899	80	556	3198	2876	-0.44	1357	1841	1229	1647	0
5	13	12	itG(GCC)D2	itG(GCC)D2	4970	20840	110	513	524	321	47	84	185	73	60	0	1173	1119	686	70	131	302	80	67	0	0.422	0.455	0.462	0.45	1.615	0.428	0.873	80	557	1569	1526	-1.243	466	1103	477	1049	0
5	14	12	iYDR265W	iYDR265W	5170	20840	110	1069	946	578	48	75	121	86	77	0	1328	1032	694	70	114	195	73	67	0	0.812	0.933	0.948	1.125	2.038	0.863	0.9	80	596	2279	1860	-0.301	1021	1258	898	962	0
5	15	12	iYDR271C	iYDR271C	5390	20840	110	653	728	515	48	75	123	82	67	0	678	760	547	71	150	880	40	0	0	0.997	0.987	0.965	1.001	2.274	0.92	0.896	80	552	1212	1369	-0.005	605	607	680	689	0
5	16	12	iYDR286C	iYDR286C	5580	20830	120	1064	1285	1112	47	58	76	85	78	0	2409	2939	2635	69	83	125	85	78	0	0.435	0.431	0.439	0.522	2.804	0.41	0.892	120	590	3357	4108	-1.202	1017	2340	1238	2870	0
5	17	12	iYDR292C	iYDR292C	5780	20830	110	854	852	587	47	64	95	87	77	0	930	885	606	68	89	143	83	71	0	0.936	0.985	0.956	1.068	2.151	0.956	0.843	80	546	1669	1622	-0.095	807	862	805	817	0
5	18	12	iYDR296W	iYDR296W	5970	20830	110	771	731	464	48	68	92	87	81	0	2776	3048	2358	71	116	244	83	77	0	0.267	0.229	0.219	0.294	2.179	0.198	0.854	80	570	3428	3660	-1.904	723	2705	683	2977	0
5	19	12	iYDR311W	iYDR311W	6180	20820	110	684	681	479	48	64	72	85	78	0	2661	2567	2039	71	123	245	82	70	0	0.246	0.254	0.247	0.297	2.084	0.232	0.874	80	569	3226	3129	-2.026	636	2590	633	2496	0
5	20	12	iYDR315C	iYDR315C	6380	20820	110	630	636	419	49	71	94	83	75	0	2261	2214	1696	69	128	264	78	70	0	0.265	0.274	0.271	0.333	2.48	0.246	0.861	80	568	2773	2732	-1.916	581	2192	587	2145	0
5	21	12	iYDR317W	iYDR317W	6580	20820	110	626	591	348	48	64	76	91	80	0	3036	2635	1898	68	129	315	78	73	0	0.195	0.212	0.221	0.263	2.587	0.19	0.873	80	593	3546	3110	-2.36	578	2968	543	2567	0
5	1	13	itK(CUU)E1	itK(CUU)E1	2590	21070	90	100	303	540	44	46	12	84	76	0	155	539	1087	67	66	25	71	63	0	0.636	0.549	0.556	0.565	3.144	0.489	0.913	52	414	144	731	-0.652	56	88	259	472	0
5	2	13	iYELWdelta6	iYELWdelta6	2780	21070	110	725	675	459	44	51	38	91	83	0	874	918	702	66	73	57	78	75	0	0.843	0.741	0.731	0.789	1.848	0.685	0.888	80	565	1489	1483	-0.247	681	808	631	852	0
5	3	13	iYEL007W	iYEL007W	2990	21070	110	2028	1853	1239	45	71	152	86	80	0	3112	2862	2015	68	107	249	80	73	0	0.651	0.647	0.66	0.739	1.934	0.597	0.875	80	584	5027	4602	-0.618	1983	3044	1808	2794	0
5	4	13	isnR14	isnR14	3190	21070	100	114	162	156	45	63	133	23	11	0	168	274	331	68	97	232	27	10	0	0.69	0.568	0.502	0.544	2.729	0.454	0.773	80	514	169	323	-0.535	69	100	117	206	0
5	5	13	iYER010C-1	iYER010C-1	3390	21060	110	863	937	726	46	63	115	82	72	0	2260	2888	2513	67	112	325	75	70	0	0.373	0.316	0.292	0.429	3.184	0.286	0.88	80	558	3010	3712	-1.424	817	2193	891	2821	0
5	6	13	iYER012W	iYER012W	3580	21060	110	369	376	244	46	70	126	71	56	0	1024	1013	784	67	129	348	68	55	0	0.338	0.349	0.319	0.357	2.087	0.31	0.846	80	552	1280	1276	-1.567	323	957	330	946	0
5	7	13	iYER027C	iYER027C	3800	21060	120	702	830	638	45	54	54	87	79	0	1942	2300	1913	68	90	151	82	75	0	0.351	0.352	0.339	0.412	2.212	0.331	0.918	120	612	2531	3017	-1.512	657	1874	785	2232	0
5	8	13	iYER031C	iYER031C	3990	21050	110	1153	1023	731	46	65	110	77	71	0	3457	2827	2228	68	118	322	78	65	0	0.327	0.354	0.325	0.369	2.292	0.33	0.913	80	514	4496	3736	-1.614	1107	3389	977	2759	0
5	9	13	iYER035W	iYER035W	4190	21050	110	2017	1978	1407	47	95	239	82	77	0	2824	2635	2039	68	164	462	71	68	0	0.715	0.752	0.709	0.843	2.059	0.702	0.913	80	569	4726	4498	-0.484	1970	2756	1931	2567	0
5	10	13	iYERWdelta9	iYERWdelta9	4390	21050	100	232	262	166	47	83	218	43	13	0	677	646	469	71	134	377	61	36	0	0.305	0.374	0.358	0.385	2.713	0.352	0.843	80	508	791	790	-1.712	185	606	215	575	0
5	11	13	iYER050C	iYER050C	4590	21050	100	251	345	282	46	52	33	85	77	0	532	791	689	70	80	72	76	71	0	0.444	0.415	0.397	0.444	2.184	0.391	0.87	80	507	667	1020	-1.172	205	462	299	721	0
5	12	13	iYER053C-1	iYER053C-1	4800	21050	120	2060	2415	2124	46	62	122	91	81	0	2876	4306	3952	68	89	189	84	76	0	0.717	0.559	0.574	0.707	2.431	0.535	0.92	120	650	4822	6607	-0.479	2014	2808	2369	4238	0
5	13	13	iYFR048W	iYFR048W	4990	21040	110	992	950	668	47	59	60	90	81	0	2278	2034	1531	70	97	173	76	71	0	0.428	0.46	0.472	0.603	2.644	0.442	0.911	80	551	3153	2867	-1.224	945	2208	903	1964	0
5	14	13	iYFR052W	iYFR052W	5200	21040	110	896	858	581	47	69	93	88	78	0	864	836	571	70	99	149	77	67	0	1.069	1.059	1.127	1.194	2.058	1.061	0.89	80	564	1643	1577	0.097	849	794	811	766	0
5	15	13	iYFR054C-0	iYFR054C-0	5400	21040	120	1166	1383	1135	47	65	111	92	79	0	2152	2420	2092	69	89	157	85	77	0	0.537	0.568	0.574	0.674	2.233	0.537	0.925	120	623	3202	3687	-0.896	1119	2083	1336	2351	0
5	16	13	iYGL257C	iYGL257C	5590	21030	110	1586	1509	1136	49	81	172	81	71	0	4160	3584	2939	69	145	426	71	67	0	0.376	0.415	0.434	0.634	3.257	0.391	0.903	80	536	5628	4975	-1.412	1537	4091	1460	3515	0
5	17	13	iYGL256W-3	iYGL256W-3	5800	21030	110	781	694	428	49	77	140	81	72	0	1921	1641	1107	68	135	383	72	68	0	0.395	0.41	0.398	0.524	2.597	0.387	0.911	80	567	2585	2218	-1.34	732	1853	645	1573	0
5	18	13	iYGL252C	iYGL252C	5990	21030	110	2683	2562	1710	48	167	597	78	68	0	4721	4194	2870	71	286	1075	75	67	0	0.567	0.61	0.618	0.684	1.842	0.577	0.912	80	560	7285	6637	-0.819	2635	4650	2514	4123	0
5	19	13	iYGL233W	iYGL233W	6190	21020	110	835	856	581	49	174	593	61	35	0	1350	1262	919	72	297	1071	53	22	0	0.615	0.678	0.65	0.787	2.342	0.643	0.901	80	568	2064	1997	-0.701	786	1278	807	1190	0
5	20	13	iYGL228W	iYGL228W	6390	21020	110	1798	1709	1007	49	124	324	82	76	0	4829	4037	2621	73	239	799	78	71	0	0.368	0.419	0.415	0.516	2.271	0.388	0.901	80	584	6505	5624	-1.443	1749	4756	1660	3964	0
5	21	13	itV(AAC)G3-0	itV(AAC)G3-0	6610	21020	110	2412	2231	1323	49	127	358	85	80	0	4869	4169	2609	73	248	818	81	71	0	0.493	0.533	0.536	0.575	1.844	0.5	0.911	80	568	7159	6278	-1.021	2363	4796	2182	4096	0
5	1	14	iYGL208W	iYGL208W	2600	21270	110	512	455	273	44	51	39	90	78	0	3596	3272	2438	68	109	308	77	73	0	0.133	0.128	0.129	0.209	3.774	0.11	0.836	80	599	3996	3615	-2.914	468	3528	411	3204	0
5	2	14	itH(GUG)G1	itH(GUG)G1	2800	21270	110	705	594	336	45	63	84	85	77	0	1406	1189	732	68	134	354	75	67	0	0.493	0.49	0.48	0.543	2.429	0.44	0.816	80	555	1998	1670	-1.02	660	1338	549	1121	0
5	3	14	itK(UUU)G1	itK(UUU)G1	3000	21270	110	866	773	438	45	71	134	83	77	0	4015	3371	2212	69	140	412	81	77	0	0.208	0.22	0.214	0.275	2.736	0.195	0.847	80	558	4767	4030	-2.265	821	3946	728	3302	0
5	4	14	iYGR091W	iYGR091W	3200	21270	100	559	532	298	44	51	57	93	83	0	1030	973	631	67	96	282	80	67	0	0.535	0.539	0.523	0.566	1.996	0.487	0.859	80	489	1478	1394	-0.903	515	963	488	906	0
5	5	14	iYGR095C	iYGR095C	3390	21260	110	523	542	343	45	58	102	82	72	0	1001	899	587	67	85	197	76	66	0	0.512	0.597	0.59	0.624	2.283	0.561	0.851	80	559	1412	1329	-0.966	478	934	497	832	0
5	6	14	iYGR099W	iYGR099W	3590	21260	110	588	611	395	46	60	55	88	81	0	1462	1497	1118	69	100	158	81	72	0	0.389	0.396	0.394	0.458	2.82	0.35	0.844	80	578	1935	1993	-1.362	542	1393	565	1428	0
5	7	14	iYGR111W	iYGR111W	3800	21250	110	485	502	331	47	60	56	81	77	0	1988	1839	1397	68	114	199	81	66	0	0.228	0.257	0.24	0.288	2.535	0.227	0.832	80	549	2358	2226	-2.132	438	1920	455	1771	0
5	8	14	iYGR117C	iYGR117C	4000	21250	110	956	882	565	47	66	88	86	78	0	2116	2174	1541	68	136	337	81	71	0	0.444	0.396	0.378	0.438	2.363	0.341	0.809	80	567	2957	2941	-1.172	909	2048	835	2106	0
5	9	14	itN(GUU)G	itN(GUU)G	4190	21250	100	243	242	128	47	65	87	72	56	0	989	1024	701	69	136	344	70	57	0	0.213	0.204	0.192	0.248	2.91	0.174	0.763	80	514	1116	1150	-2.231	196	920	195	955	0
5	10	14	iYGR133W	iYGR133W	4400	21250	110	541	513	320	46	56	40	88	83	0	2192	1958	1433	69	108	177	81	77	0	0.233	0.247	0.242	0.273	2.387	0.216	0.848	80	571	2618	2356	-2.101	495	2123	467	1889	0
5	11	14	iYGR138C	iYGR138C	4600	21240	90	185	191	100	47	56	39	80	71	0	581	510	306	70	100	151	73	65	0	0.27	0.327	0.287	0.354	2.408	0.029	0.105	52	414	649	584	-1.889	138	511	144	440	0
5	12	14	iYGR142W	iYGR142W	4800	21250	110	841	859	572	46	67	100	91	77	0	1246	1165	817	71	115	226	78	70	0	0.677	0.743	0.73	0.896	2.771	0.664	0.809	80	562	1970	1907	-0.564	795	1175	813	1094	0
5	13	14	iYGR154C	iYGR154C	5010	21240	110	889	1060	820	47	77	121	80	70	0	4424	4613	3912	71	166	453	76	67	0	0.193	0.223	0.223	0.256	2.436	0.199	0.855	80	568	5195	5555	-2.37	842	4353	1013	4542	0
5	14	14	iYGR158C	iYGR158C	5200	21240	100	602	575	354	47	71	102	81	73	0	1378	1524	1205	71	168	470	65	53	0	0.425	0.363	0.343	0.47	3	0.302	0.839	80	497	1862	1981	-1.236	555	1307	528	1453	0
5	15	14	iYGRCdelta30	iYGRCdelta30	5400	21240	100	574	585	347	48	69	90	88	78	0	1026	1048	739	72	125	248	73	65	0	0.551	0.55	0.54	0.622	2.202	0.495	0.854	80	494	1480	1513	-0.859	526	954	537	976	0
5	16	14	iYHR094C	iYHR094C	5610	21230	110	1460	1226	790	49	78	129	85	80	0	2752	2251	1548	70	132	287	77	76	0	0.526	0.54	0.524	0.566	2.78	0.497	0.851	80	568	4093	3358	-0.927	1411	2682	1177	2181	0
5	17	14	iYHR098C	iYHR098C	5800	21230	100	543	579	357	48	73	109	85	73	0	2085	2432	1837	70	149	413	80	70	0	0.246	0.225	0.226	0.269	2.354	0.185	0.798	80	505	2510	2893	-2.025	495	2015	531	2362	0
[truncated: 11,470 more rows]
