# Supplementary material for: Genome-Wide Mapping of the Cohesin Complex in the Yeast Saccharomyces cerevisiae
Source: PLoS Biol. 2004 Jul 27;2(9):e259. doi: 10.1371/journal.pbio.0020259 (PMC490026; doi:10.1371/journal.pbio.0020259)
Supplement: Dataset S42 — Cy3 = genomic DNA; Cy5 = ChIP nocodazole arrest glucose Mcd1-18Myc in W303. (4.4 MB XLS). [file pbio.0020259.sd042.xls]

ATF	1.0
27	82    
"Type=GenePix Results 2"
"DateTime=2002/09/14 09:52:43"
"Settings=L:\cohesin followup\UP6_210.gps"
"GalFile=C:\Documents and Settings\jen.JEN-W2000\Desktop\UberChip6.gal"
"PixelSize=10"
"Wavelengths=635	532"
"ImageFiles=L:\cohesin followup\UP6_0210_635.tif 0	L:\cohesin followup\UP6_0210_532.tif 0"
"NormalizationMethod=None"
"NormalizationFactors=1	1"
"JpegImage=L:\cohesin followup\UP6_0210.jpg"
"RatioFormulations=W1/W2 (635/532)"
"Barcode="
"BackgroundSubtraction=LocalFeature"
"ImageOrigin=1040, 24170"
"JpegOrigin=1480, 24230"
"Creator=GenePix Pro 4.0.1.9"
"Scanner=GenePix 4000B [87097]"
"FocusPosition=0"
"Temperature=27.58"
"LinesAveraged=1"
"Comment=Cy5=1827 NZ MycMcd1 ChIP 9-6 Cy3=total gDNA"
"PMTGain=690	540"
"ScanPower=100	100"
"LaserPower=3.37	3.64"
"LaserOnTime=15797	15809"
"ScanRegion=104,2417,2028,6206"
"Supplier="
"Block"	"Column"	"Row"	"Name"	"ID"	"X"	"Y"	"Dia."	"F635 Median"	"F635 Mean"	"F635 SD"	"B635 Median"	"B635 Mean"	"B635 SD"	"% > B635+1SD"	"% > B635+2SD"	"F635 % Sat."	"F532 Median"	"F532 Mean"	"F532 SD"	"B532 Median"	"B532 Mean"	"B532 SD"	"% > B532+1SD"	"% > B532+2SD"	"F532 % Sat."	"F3 Median"	"F3 Mean"	"F3 SD"	"B3 Median"	"B3 Mean"	"B3 SD"	"% > B3+1SD"	"% > B3+2SD"	"F3 % Sat."	"F4 Median"	"F4 Mean"	"F4 SD"	"B4 Median"	"B4 Mean"	"B4 SD"	"% > B4+1SD"	"% > B4+2SD"	"F4 % Sat."	"Ratio of Medians (635/532)"	"Ratio of Means (635/532)"	"Median of Ratios (635/532)"	"Mean of Ratios (635/532)"	"Ratios SD (635/532)"	"Rgn Ratio (635/532)"	"Rgn R� (635/532)"	"Ratio of Medians (Ratio/2)"	"Ratio of Means (Ratio/2)"	"Median of Ratios (Ratio/2)"	"Mean of Ratios (Ratio/2)"	"Ratios SD (Ratio/2)"	"Rgn Ratio (Ratio/2)"	"Rgn R� (Ratio/2)"	"Ratio of Medians (Ratio/3)"	"Ratio of Means (Ratio/3)"	"Median of Ratios (Ratio/3)"	"Mean of Ratios (Ratio/3)"	"Ratios SD (Ratio/3)"	"Rgn Ratio (Ratio/3)"	"Rgn R� (Ratio/3)"	"F Pixels"	"B Pixels"	"Sum of Medians"	"Sum of Means"	"Log Ratio (635/532)"	"Log Ratio (Ratio/2)"	"Log Ratio (Ratio/3)"	"F635 Median - B635"	"F532 Median - B532"	"F3 Median - B3"	"F4 Median - B4"	"F635 Mean - B635"	"F532 Mean - B532"	"F3 Mean - B3"	"F4 Mean - B4"	"Flags"	"Normalize"
1	1	1	""	"YBL081W"	1790	24660	110	1684	1907	1083	90	94	40	100	100	0	2421	2884	1582	69	79	51	100	100	0	0	0	0	0	0	0	0	0	0	0	0	0	0	0	0	0	0	0	0.678	0.645	0.646	0.634	1.240	0.651	0.965	0.000	0.000	0.000	0.000	0.000	0.000	0.000	0.000	0.000	0.000	0.000	0.000	0.000	0.000	80	644	3946	4632	-0.561	Error	Error	1594	2352	0	0	1817	2815	0	0	0	0
1	2	1	""	"YBL112C"	2020	24640	100	9073	10940	6912	88	93	40	100	100	0	16769	20599	12749	73	81	35	100	100	0	0	0	0	0	0	0	0	0	0	0	0	0	0	0	0	0	0	0	0.538	0.529	0.528	0.521	1.408	0.521	0.937	0.000	0.000	0.000	0.000	0.000	0.000	0.000	0.000	0.000	0.000	0.000	0.000	0.000	0.000	80	516	25681	31378	-0.894	Error	Error	8985	16696	0	0	10852	20526	0	0	0	0
1	3	1	"CDS1"	"YBR029C"	2210	24640	100	330	370	187	90	95	40	91	87	0	640	683	358	72	81	35	100	98	0	0	0	0	0	0	0	0	0	0	0	0	0	0	0	0	0	0	0	0.423	0.458	0.472	0.436	2.008	0.450	0.739	0.000	0.000	0.000	0.000	0.000	0.000	0.000	0.000	0.000	0.000	0.000	0.000	0.000	0.000	80	510	808	891	-1.243	Error	Error	240	568	0	0	280	611	0	0	0	0
1	4	1	""	"YBL083C"	2410	24640	80	188	225	118	92	99	44	71	55	0	284	348	221	68	74	30	96	88	0	0	0	0	0	0	0	0	0	0	0	0	0	0	0	0	0	0	0	0.444	0.475	0.464	0.420	2.501	0.473	0.618	0.000	0.000	0.000	0.000	0.000	0.000	0.000	0.000	0.000	0.000	0.000	0.000	0.000	0.000	52	320	312	413	-1.170	Error	Error	96	216	0	0	133	280	0	0	0	0
1	5	1	"NTH2"	"YBR001C"	2610	24640	60	508	1023	1469	93	98	45	100	93	0	313	498	599	69	87	117	90	50	0	0	0	0	0	0	0	0	0	0	0	0	0	0	0	0	0	0	0	1.701	2.168	1.957	1.779	1.877	2.488	0.862	0.000	0.000	0.000	0.000	0.000	0.000	0.000	0.000	0.000	0.000	0.000	0.000	0.000	0.000	32	160	659	1359	0.766	Error	Error	415	244	0	0	930	429	0	0	0	0
1	6	1	"RPL4A"	"YBR031W"	2810	24640	80	1086	1455	1093	94	98	38	98	96	0	1563	1829	1358	71	83	41	100	98	0	0	0	0	0	0	0	0	0	0	0	0	0	0	0	0	0	0	0	0.665	0.774	0.738	0.744	1.731	0.784	0.932	0.000	0.000	0.000	0.000	0.000	0.000	0.000	0.000	0.000	0.000	0.000	0.000	0.000	0.000	52	320	2484	3119	-0.589	Error	Error	992	1492	0	0	1361	1758	0	0	0	0
1	7	1	"BOI1"	"YBL085W"	3000	24620	50	147	148	56	107	109	47	41	16	0	172	190	114	79	100	76	58	33	0	0	0	0	0	0	0	0	0	0	0	0	0	0	0	0	0	0	0	0.430	0.369	0.452	0.410	2.107	0.375	0.119	0.000	0.000	0.000	0.000	0.000	0.000	0.000	0.000	0.000	0.000	0.000	0.000	0.000	0.000	12	72	133	152	-1.217	Error	Error	40	93	0	0	41	111	0	0	0	0
1	8	1	"COQ1"	"YBR003W"	3200	24630	70	11952	14833	10929	94	112	82	100	100	0	7511	8541	6126	72	94	82	100	96	0	0	0	0	0	0	0	0	0	0	0	0	0	0	0	0	0	0	0	1.594	1.740	1.694	1.742	1.641	1.793	0.939	0.000	0.000	0.000	0.000	0.000	0.000	0.000	0.000	0.000	0.000	0.000	0.000	0.000	0.000	32	206	19297	23208	0.673	Error	Error	11858	7439	0	0	14739	8469	0	0	0	0
1	9	1	""	"YBR033W"	3400	24640	80	2419	4190	4433	99	104	47	100	100	0	2730	4052	3846	71	82	92	100	100	0	0	0	0	0	0	0	0	0	0	0	0	0	0	0	0	0	0	0	0.873	1.028	0.958	0.867	1.692	1.106	0.910	0.000	0.000	0.000	0.000	0.000	0.000	0.000	0.000	0.000	0.000	0.000	0.000	0.000	0.000	52	320	4979	8072	-0.197	Error	Error	2320	2659	0	0	4091	3981	0	0	0	0
1	10	1	"RPL23A"	"YBL087C"	3610	24630	80	2621	2744	1639	90	94	38	100	100	0	4323	5106	3007	68	75	30	100	100	0	0	0	0	0	0	0	0	0	0	0	0	0	0	0	0	0	0	0	0.595	0.527	0.512	0.525	1.278	0.530	0.933	0.000	0.000	0.000	0.000	0.000	0.000	0.000	0.000	0.000	0.000	0.000	0.000	0.000	0.000	52	306	6786	7692	-0.749	Error	Error	2531	4255	0	0	2654	5038	0	0	0	0
1	11	1	""	"YBR005W"	3790	24640	90	13603	12227	6624	90	99	44	100	100	0	4295	4490	2503	71	77	31	100	100	0	0	0	0	0	0	0	0	0	0	0	0	0	0	0	0	0	0	0	3.199	2.747	2.861	2.828	1.536	2.707	0.953	0.000	0.000	0.000	0.000	0.000	0.000	0.000	0.000	0.000	0.000	0.000	0.000	0.000	0.000	52	394	17737	16556	1.678	Error	Error	13513	4224	0	0	12137	4419	0	0	0	0
1	12	1	"PDX3"	"YBR035C"	4000	24640	90	8542	7830	2604	91	97	42	100	100	0	10881	9942	2967	72	77	26	100	100	0	0	0	0	0	0	0	0	0	0	0	0	0	0	0	0	0	0	0	0.782	0.784	0.784	0.759	1.277	0.785	0.937	0.000	0.000	0.000	0.000	0.000	0.000	0.000	0.000	0.000	0.000	0.000	0.000	0.000	0.000	52	365	19260	17609	-0.355	Error	Error	8451	10809	0	0	7739	9870	0	0	0	0
1	13	1	""	"YCL045C"	4180	24650	150	103	106	53	91	96	44	23	7	0	84	107	88	72	78	30	32	17	0	0	0	0	0	0	0	0	0	0	0	0	0	0	0	0	0	0	0	1.000	0.429	1.258	1.101	4.253	0.741	0.022	0.000	0.000	0.000	0.000	0.000	0.000	0.000	0.000	0.000	0.000	0.000	0.000	0.000	0.000	156	1014	24	50	0.000	Error	Error	12	12	0	0	15	35	0	0	-50	0
1	14	1	""	"YCLX04W"	4400	24650	80	5680	5348	1634	91	94	44	100	100	0	10973	10092	2947	74	78	29	100	100	0	0	0	0	0	0	0	0	0	0	0	0	0	0	0	0	0	0	0	0.513	0.525	0.522	0.528	1.219	0.507	0.925	0.000	0.000	0.000	0.000	0.000	0.000	0.000	0.000	0.000	0.000	0.000	0.000	0.000	0.000	52	332	16488	15275	-0.964	Error	Error	5589	10899	0	0	5257	10018	0	0	0	0
1	15	1	""	"YCR023C"	4600	24650	80	252	571	844	95	98	44	86	69	0	425	832	1309	74	79	31	100	96	0	0	0	0	0	0	0	0	0	0	0	0	0	0	0	0	0	0	0	0.447	0.628	0.510	0.503	1.894	0.628	0.896	0.000	0.000	0.000	0.000	0.000	0.000	0.000	0.000	0.000	0.000	0.000	0.000	0.000	0.000	52	308	508	1234	-1.161	Error	Error	157	351	0	0	476	758	0	0	0	0
1	16	1	""	"YCL047C"	4780	24650	150	107	109	53	94	123	301	0	0	0	82	100	66	73	126	634	0	0	0	0	0	0	0	0	0	0	0	0	0	0	0	0	0	0	0	0	0	1.444	0.556	1.500	1.401	4.191	1.427	0.089	0.000	0.000	0.000	0.000	0.000	0.000	0.000	0.000	0.000	0.000	0.000	0.000	0.000	0.000	156	1012	22	42	0.531	Error	Error	13	9	0	0	15	27	0	0	-50	0
1	17	1	""	"YCLX06C"	5000	24640	70	5515	5204	2251	92	127	193	100	100	0	9338	8374	3345	68	99	324	100	100	0	0	0	0	0	0	0	0	0	0	0	0	0	0	0	0	0	0	0	0.585	0.615	0.623	0.621	1.303	0.611	0.928	0.000	0.000	0.000	0.000	0.000	0.000	0.000	0.000	0.000	0.000	0.000	0.000	0.000	0.000	32	220	14693	13418	-0.773	Error	Error	5423	9270	0	0	5112	8306	0	0	0	0
1	18	1	"PMP1"	"YCR024C-A"	5190	24650	90	804	810	264	85	93	38	100	100	0	1562	1606	413	66	71	25	100	100	0	0	0	0	0	0	0	0	0	0	0	0	0	0	0	0	0	0	0	0.481	0.471	0.453	0.454	1.323	0.471	0.890	0.000	0.000	0.000	0.000	0.000	0.000	0.000	0.000	0.000	0.000	0.000	0.000	0.000	0.000	52	376	2215	2265	-1.057	Error	Error	719	1496	0	0	725	1540	0	0	0	0
1	19	1	""	"YCL049C"	5370	24650	150	99	106	56	89	94	39	23	11	0	73	98	96	65	71	28	23	12	0	0	0	0	0	0	0	0	0	0	0	0	0	0	0	0	0	0	0	1.250	0.515	1.381	1.486	4.019	0.630	0.146	0.000	0.000	0.000	0.000	0.000	0.000	0.000	0.000	0.000	0.000	0.000	0.000	0.000	0.000	156	1050	18	50	0.322	Error	Error	10	8	0	0	17	33	0	0	-50	0
1	20	1	""	"YCLX08C"	5580	24630	70	8624	7506	3277	97	253	880	96	87	0	6796	5593	2530	63	262	963	90	84	0	0	0	0	0	0	0	0	0	0	0	0	0	0	0	0	0	0	0	1.266	1.340	1.348	1.337	1.256	1.297	0.947	0.000	0.000	0.000	0.000	0.000	0.000	0.000	0.000	0.000	0.000	0.000	0.000	0.000	0.000	32	206	15260	12939	0.341	Error	Error	8527	6733	0	0	7409	5530	0	0	0	0
1	21	1	""	"YCR026C"	5790	24630	80	371	501	407	91	97	43	94	86	0	497	817	714	66	74	28	98	98	0	0	0	0	0	0	0	0	0	0	0	0	0	0	0	0	0	0	0	0.650	0.546	0.452	0.511	1.903	0.514	0.724	0.000	0.000	0.000	0.000	0.000	0.000	0.000	0.000	0.000	0.000	0.000	0.000	0.000	0.000	52	298	711	1161	-0.622	Error	Error	280	431	0	0	410	751	0	0	0	0
1	1	2	"LRE1"	"YCL051W"	1790	24850	70	111	124	69	90	97	39	37	21	0	97	151	110	74	81	32	40	34	0	0	0	0	0	0	0	0	0	0	0	0	0	0	0	0	0	0	0	0.913	0.442	0.796	1.080	4.098	0.499	0.170	0.000	0.000	0.000	0.000	0.000	0.000	0.000	0.000	0.000	0.000	0.000	0.000	0.000	0.000	32	236	44	111	-0.131	Error	Error	21	23	0	0	34	77	0	0	0	0
1	2	2	""	"YCLX10C"	1990	24850	90	22866	22025	6673	97	108	116	100	100	0	8828	8169	2720	77	86	42	100	100	0	0	0	0	0	0	0	0	0	0	0	0	0	0	0	0	0	0	0	2.602	2.710	2.652	2.771	1.357	2.769	0.906	0.000	0.000	0.000	0.000	0.000	0.000	0.000	0.000	0.000	0.000	0.000	0.000	0.000	0.000	52	420	31520	30020	1.380	Error	Error	22769	8751	0	0	21928	8092	0	0	0	0
1	3	2	"FEN2"	"YCR028C"	2190	24860	80	19687	18512	6438	93	101	45	100	100	0	17673	16575	5529	77	84	37	100	100	0	0	0	0	0	0	0	0	0	0	0	0	0	0	0	0	0	0	0	1.114	1.116	1.145	1.122	1.327	1.108	0.939	0.000	0.000	0.000	0.000	0.000	0.000	0.000	0.000	0.000	0.000	0.000	0.000	0.000	0.000	52	340	37190	34917	0.155	Error	Error	19594	17596	0	0	18419	16498	0	0	0	0
1	4	2	"SHR3"	"YDL212W"	2390	24850	70	253	440	424	94	102	44	90	68	0	468	722	762	77	84	38	100	93	0	0	0	0	0	0	0	0	0	0	0	0	0	0	0	0	0	0	0	0.407	0.536	0.513	0.480	1.787	0.521	0.810	0.000	0.000	0.000	0.000	0.000	0.000	0.000	0.000	0.000	0.000	0.000	0.000	0.000	0.000	32	236	550	991	-1.298	Error	Error	159	391	0	0	346	645	0	0	0	0
1	5	2	"THI13"	"YDL244W"	2590	24860	80	811	1532	2485	95	103	46	100	96	0	1260	1820	2511	73	81	36	98	98	0	0	0	0	0	0	0	0	0	0	0	0	0	0	0	0	0	0	0	0.603	0.823	0.787	0.738	2.355	0.947	0.868	0.000	0.000	0.000	0.000	0.000	0.000	0.000	0.000	0.000	0.000	0.000	0.000	0.000	0.000	52	340	1903	3184	-0.729	Error	Error	716	1187	0	0	1437	1747	0	0	0	0
1	6	2	"REG1"	"YDR028C"	2780	24860	90	346	521	518	95	99	41	96	94	0	762	948	695	77	87	40	98	98	0	0	0	0	0	0	0	0	0	0	0	0	0	0	0	0	0	0	0	0.366	0.489	0.394	0.426	1.777	0.577	0.742	0.000	0.000	0.000	0.000	0.000	0.000	0.000	0.000	0.000	0.000	0.000	0.000	0.000	0.000	52	420	936	1297	-1.448	Error	Error	251	685	0	0	426	871	0	0	0	0
1	7	2	""	"YDL214C"	2980	24880	50	187	165	62	101	110	52	58	33	0	193	241	128	79	106	98	50	33	0	0	0	0	0	0	0	0	0	0	0	0	0	0	0	0	0	0	0	0.754	0.395	0.433	0.476	1.850	0.325	0.415	0.000	0.000	0.000	0.000	0.000	0.000	0.000	0.000	0.000	0.000	0.000	0.000	0.000	0.000	12	104	200	226	-0.407	Error	Error	86	114	0	0	64	162	0	0	0	0
1	8	2	""	"YDL246C"	3180	24850	60	130	149	75	90	94	40	46	34	0	145	193	158	74	80	31	71	59	0	0	0	0	0	0	0	0	0	0	0	0	0	0	0	0	0	0	0	0.563	0.496	0.748	0.796	3.622	0.311	0.252	0.000	0.000	0.000	0.000	0.000	0.000	0.000	0.000	0.000	0.000	0.000	0.000	0.000	0.000	32	176	111	178	-0.828	Error	Error	40	71	0	0	59	119	0	0	0	0
1	9	2	"RAD28"	"YDR030C"	3380	24880	70	313	492	545	95	99	43	90	71	0	526	954	1450	73	85	42	96	90	0	0	0	0	0	0	0	0	0	0	0	0	0	0	0	0	0	0	0	0.481	0.451	0.444	0.496	2.745	0.330	0.649	0.000	0.000	0.000	0.000	0.000	0.000	0.000	0.000	0.000	0.000	0.000	0.000	0.000	0.000	32	236	671	1278	-1.055	Error	Error	218	453	0	0	397	881	0	0	0	0
1	10	2	""	"YDL216C"	3570	24880	70	291	689	821	99	105	44	87	68	0	443	932	1067	71	80	34	96	96	0	0	0	0	0	0	0	0	0	0	0	0	0	0	0	0	0	0	0	0.516	0.685	0.544	0.516	2.065	0.725	0.845	0.000	0.000	0.000	0.000	0.000	0.000	0.000	0.000	0.000	0.000	0.000	0.000	0.000	0.000	32	236	564	1451	-0.954	Error	Error	192	372	0	0	590	861	0	0	0	0
1	11	2	"COS7"	"YDL248W"	3800	24850	70	492	1702	2546	93	100	48	90	84	0	676	2031	3221	71	76	31	100	100	0	0	0	0	0	0	0	0	0	0	0	0	0	0	0	0	0	0	0	0.660	0.821	0.588	0.626	2.577	0.734	0.520	0.000	0.000	0.000	0.000	0.000	0.000	0.000	0.000	0.000	0.000	0.000	0.000	0.000	0.000	32	236	1004	3569	-0.601	Error	Error	399	605	0	0	1609	1960	0	0	0	0
1	12	2	""	"YDR032C"	3990	24850	80	357	748	847	97	106	54	94	90	0	791	1797	2284	74	82	37	100	98	0	0	0	0	0	0	0	0	0	0	0	0	0	0	0	0	0	0	0	0.363	0.378	0.394	0.374	1.965	0.358	0.902	0.000	0.000	0.000	0.000	0.000	0.000	0.000	0.000	0.000	0.000	0.000	0.000	0.000	0.000	52	340	977	2374	-1.463	Error	Error	260	717	0	0	651	1723	0	0	0	0
1	13	2	""	"YDL218W"	4190	24850	80	5037	5605	3282	95	99	47	100	100	0	5304	6098	3424	74	82	44	100	100	0	0	0	0	0	0	0	0	0	0	0	0	0	0	0	0	0	0	0	0.945	0.915	0.926	0.895	1.419	0.927	0.833	0.000	0.000	0.000	0.000	0.000	0.000	0.000	0.000	0.000	0.000	0.000	0.000	0.000	0.000	52	334	10172	11534	-0.082	Error	Error	4942	5230	0	0	5510	6024	0	0	0	0
1	14	2	"YRB1"	"YDR002W"	4400	24860	90	8877	7847	2696	92	113	184	100	100	0	6062	5464	1662	74	89	62	100	100	0	0	0	0	0	0	0	0	0	0	0	0	0	0	0	0	0	0	0	1.467	1.439	1.450	1.381	1.312	1.458	0.941	0.000	0.000	0.000	0.000	0.000	0.000	0.000	0.000	0.000	0.000	0.000	0.000	0.000	0.000	52	420	14773	13145	0.553	Error	Error	8785	5988	0	0	7755	5390	0	0	0	0
1	15	2	"LYS14"	"YDR034C"	4590	24850	80	924	2134	2843	93	101	45	100	100	0	945	1907	2395	74	86	51	100	100	0	0	0	0	0	0	0	0	0	0	0	0	0	0	0	0	0	0	0	0.954	1.113	0.924	0.997	1.686	1.177	0.886	0.000	0.000	0.000	0.000	0.000	0.000	0.000	0.000	0.000	0.000	0.000	0.000	0.000	0.000	52	340	1702	3874	-0.068	Error	Error	831	871	0	0	2041	1833	0	0	0	0
1	16	2	"MRP1"	"YDR347W"	4780	24850	100	9419	9083	2877	97	141	404	100	100	0	13114	12349	3671	78	175	871	100	100	0	0	0	0	0	0	0	0	0	0	0	0	0	0	0	0	0	0	0	0.715	0.732	0.706	0.720	1.354	0.716	0.913	0.000	0.000	0.000	0.000	0.000	0.000	0.000	0.000	0.000	0.000	0.000	0.000	0.000	0.000	80	510	22358	21257	-0.484	Error	Error	9322	13036	0	0	8986	12271	0	0	0	0
1	17	2	"RGA2"	"YDR379W"	5000	24850	80	6594	7158	4946	102	108	46	100	100	0	10651	11406	7546	85	94	41	100	100	0	0	0	0	0	0	0	0	0	0	0	0	0	0	0	0	0	0	0	0.614	0.623	0.582	0.585	1.570	0.626	0.933	0.000	0.000	0.000	0.000	0.000	0.000	0.000	0.000	0.000	0.000	0.000	0.000	0.000	0.000	52	335	17058	18377	-0.703	Error	Error	6492	10566	0	0	7056	11321	0	0	0	0
1	18	2	""	"YDR411C"	5170	24870	90	10851	10435	4119	103	109	45	100	100	0	12956	11967	5160	81	94	84	100	100	0	0	0	0	0	0	0	0	0	0	0	0	0	0	0	0	0	0	0	0.835	0.869	0.853	0.895	1.415	0.830	0.928	0.000	0.000	0.000	0.000	0.000	0.000	0.000	0.000	0.000	0.000	0.000	0.000	0.000	0.000	52	408	23623	22218	-0.261	Error	Error	10748	12875	0	0	10332	11886	0	0	0	0
1	19	2	"YPS7"	"YDR349C"	5370	24870	80	236	247	100	87	97	42	90	73	0	297	311	130	71	78	33	98	98	0	0	0	0	0	0	0	0	0	0	0	0	0	0	0	0	0	0	0	0.659	0.667	0.691	0.623	2.009	0.682	0.544	0.000	0.000	0.000	0.000	0.000	0.000	0.000	0.000	0.000	0.000	0.000	0.000	0.000	0.000	52	340	375	400	-0.601	Error	Error	149	226	0	0	160	240	0	0	0	0
1	20	2	"YRA1"	"YDR381W"	5560	24870	80	4114	3970	888	88	94	42	100	100	0	4017	3720	877	69	72	30	100	100	0	0	0	0	0	0	0	0	0	0	0	0	0	0	0	0	0	0	0	1.020	1.063	1.054	1.070	1.293	1.026	0.930	0.000	0.000	0.000	0.000	0.000	0.000	0.000	0.000	0.000	0.000	0.000	0.000	0.000	0.000	52	340	7974	7533	0.028	Error	Error	4026	3948	0	0	3882	3651	0	0	0	0
1	21	2	""	"YDR413C"	5790	24840	80	6947	6458	1893	96	99	45	100	100	0	11071	10245	2529	68	76	52	100	100	0	0	0	0	0	0	0	0	0	0	0	0	0	0	0	0	0	0	0	0.623	0.625	0.625	0.607	1.256	0.612	0.934	0.000	0.000	0.000	0.000	0.000	0.000	0.000	0.000	0.000	0.000	0.000	0.000	0.000	0.000	52	332	17854	16539	-0.684	Error	Error	6851	11003	0	0	6362	10177	0	0	0	0
1	1	3	"SBE2"	"YDR351W"	1790	25060	80	10658	10293	3565	97	104	51	100	100	0	20361	19387	6121	78	99	146	100	100	0	0	0	0	0	0	0	0	0	0	0	0	0	0	0	0	0	0	0	0.521	0.528	0.530	0.520	1.254	0.519	0.947	0.000	0.000	0.000	0.000	0.000	0.000	0.000	0.000	0.000	0.000	0.000	0.000	0.000	0.000	52	340	30844	29505	-0.942	Error	Error	10561	20283	0	0	10196	19309	0	0	0	0
1	2	3	""	"YDR383C"	1980	25090	90	12780	11341	3558	103	111	56	100	100	0	10502	9549	2702	91	114	138	100	100	0	0	0	0	0	0	0	0	0	0	0	0	0	0	0	0	0	0	0	1.218	1.188	1.196	1.163	1.222	1.207	0.943	0.000	0.000	0.000	0.000	0.000	0.000	0.000	0.000	0.000	0.000	0.000	0.000	0.000	0.000	52	420	23088	20696	0.284	Error	Error	12677	10411	0	0	11238	9458	0	0	0	0
1	3	3	""	"YDR415C"	2170	25090	80	8685	8064	2309	96	109	59	100	100	0	18939	17498	4702	86	122	171	100	100	0	0	0	0	0	0	0	0	0	0	0	0	0	0	0	0	0	0	0	0.456	0.458	0.462	0.452	1.240	0.438	0.941	0.000	0.000	0.000	0.000	0.000	0.000	0.000	0.000	0.000	0.000	0.000	0.000	0.000	0.000	52	340	27442	25380	-1.134	Error	Error	8589	18853	0	0	7968	17412	0	0	0	0
1	4	3	"TRR1"	"YDR353W"	2380	25060	80	11789	10383	3649	101	108	51	100	100	0	18768	15884	5357	77	88	45	100	100	0	0	0	0	0	0	0	0	0	0	0	0	0	0	0	0	0	0	0	0.625	0.650	0.643	0.645	1.349	0.628	0.945	0.000	0.000	0.000	0.000	0.000	0.000	0.000	0.000	0.000	0.000	0.000	0.000	0.000	0.000	52	340	30379	26089	-0.677	Error	Error	11688	18691	0	0	10282	15807	0	0	0	0
1	5	3	"EFT2"	"YDR385W"	2600	25060	80	15976	14766	4258	95	108	99	100	100	0	29612	26562	7314	77	86	38	100	100	0	0	0	0	0	0	0	0	0	0	0	0	0	0	0	0	0	0	0	0.538	0.554	0.548	0.549	1.242	0.545	0.944	0.000	0.000	0.000	0.000	0.000	0.000	0.000	0.000	0.000	0.000	0.000	0.000	0.000	0.000	52	340	45416	41156	-0.895	Error	Error	15881	29535	0	0	14671	26485	0	0	0	0
1	6	3	""	"YDR417C"	2790	25050	90	6134	5496	1831	98	105	45	100	100	0	8436	7255	2523	79	90	40	100	100	0	0	0	0	0	0	0	0	0	0	0	0	0	0	0	0	0	0	0	0.722	0.752	0.761	0.755	1.338	0.732	0.935	0.000	0.000	0.000	0.000	0.000	0.000	0.000	0.000	0.000	0.000	0.000	0.000	0.000	0.000	52	411	14393	12574	-0.469	Error	Error	6036	8357	0	0	5398	7176	0	0	0	0
1	7	3	""	"YER097W"	2960	25090	80	1556	1942	1202	94	103	71	100	100	0	2741	3378	2302	75	97	130	100	100	0	0	0	0	0	0	0	0	0	0	0	0	0	0	0	0	0	0	0	0.548	0.559	0.566	0.582	1.495	0.519	0.854	0.000	0.000	0.000	0.000	0.000	0.000	0.000	0.000	0.000	0.000	0.000	0.000	0.000	0.000	52	337	4128	5151	-0.867	Error	Error	1462	2666	0	0	1848	3303	0	0	0	0
1	8	3	""	"YER128W"	3180	25060	80	9352	8817	2418	100	106	43	100	100	0	12746	11954	3044	78	88	48	100	100	0	0	0	0	0	0	0	0	0	0	0	0	0	0	0	0	0	0	0	0.730	0.734	0.718	0.724	1.306	0.701	0.935	0.000	0.000	0.000	0.000	0.000	0.000	0.000	0.000	0.000	0.000	0.000	0.000	0.000	0.000	52	340	21920	20593	-0.453	Error	Error	9252	12668	0	0	8717	11876	0	0	0	0
1	9	3	""	"YER160C"	3390	25060	70	3325	4044	2897	101	109	96	100	100	0	5060	5857	4122	83	131	311	100	100	0	0	0	0	0	0	0	0	0	0	0	0	0	0	0	0	0	0	0	0.648	0.683	0.642	0.604	1.730	0.645	0.822	0.000	0.000	0.000	0.000	0.000	0.000	0.000	0.000	0.000	0.000	0.000	0.000	0.000	0.000	32	236	8201	9717	-0.626	Error	Error	3224	4977	0	0	3943	5774	0	0	0	0
1	10	3	"PRS2"	"YER099C"	3570	25060	100	4734	6146	4025	101	111	75	100	100	0	4775	5729	3949	80	106	210	100	97	0	0	0	0	0	0	0	0	0	0	0	0	0	0	0	0	0	0	0	0.987	1.070	1.075	1.130	1.517	1.047	0.909	0.000	0.000	0.000	0.000	0.000	0.000	0.000	0.000	0.000	0.000	0.000	0.000	0.000	0.000	80	536	9328	11694	-0.019	Error	Error	4633	4695	0	0	6045	5649	0	0	0	0
1	11	3	""	"YER130C"	3790	25060	80	19372	17337	5729	102	106	50	100	100	0	11812	10277	3305	81	90	41	100	100	0	0	0	0	0	0	0	0	0	0	0	0	0	0	0	0	0	0	0	1.643	1.690	1.686	1.672	1.230	1.677	0.948	0.000	0.000	0.000	0.000	0.000	0.000	0.000	0.000	0.000	0.000	0.000	0.000	0.000	0.000	52	340	31001	27431	0.716	Error	Error	19270	11731	0	0	17235	10196	0	0	0	0
1	12	3	"RAD4"	"YER162C"	4000	25060	80	7810	8499	5103	96	103	44	100	100	0	15567	17799	9341	80	90	48	100	100	0	0	0	0	0	0	0	0	0	0	0	0	0	0	0	0	0	0	0	0.498	0.474	0.453	0.447	1.413	0.486	0.943	0.000	0.000	0.000	0.000	0.000	0.000	0.000	0.000	0.000	0.000	0.000	0.000	0.000	0.000	52	340	23201	26122	-1.006	Error	Error	7714	15487	0	0	8403	17719	0	0	0	0
1	13	3	"AST2"	"YER101C"	4190	25060	100	14577	12919	5053	100	105	46	100	100	0	14483	12242	4876	77	86	44	98	98	0	0	0	0	0	0	0	0	0	0	0	0	0	0	0	0	0	0	0	1.005	1.054	1.036	1.119	1.780	1.047	0.954	0.000	0.000	0.000	0.000	0.000	0.000	0.000	0.000	0.000	0.000	0.000	0.000	0.000	0.000	80	540	28883	24984	0.007	Error	Error	14477	14406	0	0	12819	12165	0	0	0	0
1	14	3	"PMD1"	"YER132C"	4390	25060	80	3312	4027	2801	97	106	47	100	100	0	4049	5438	3858	76	91	53	100	100	0	0	0	0	0	0	0	0	0	0	0	0	0	0	0	0	0	0	0	0.809	0.733	0.701	0.719	1.584	0.720	0.908	0.000	0.000	0.000	0.000	0.000	0.000	0.000	0.000	0.000	0.000	0.000	0.000	0.000	0.000	52	340	7188	9292	-0.305	Error	Error	3215	3973	0	0	3930	5362	0	0	0	0
1	15	3	"CHD1"	"YER164W"	4590	25060	70	4275	4862	3120	96	106	71	100	100	0	7286	8647	5175	79	88	46	100	100	0	0	0	0	0	0	0	0	0	0	0	0	0	0	0	0	0	0	0	0.580	0.556	0.549	0.526	1.629	0.555	0.899	0.000	0.000	0.000	0.000	0.000	0.000	0.000	0.000	0.000	0.000	0.000	0.000	0.000	0.000	32	236	11386	13334	-0.786	Error	Error	4179	7207	0	0	4766	8568	0	0	0	0
1	16	3	"SSA4"	"YER103W"	4780	25060	80	11361	11569	5813	101	110	52	100	100	0	12247	11260	5490	82	92	48	100	100	0	0	0	0	0	0	0	0	0	0	0	0	0	0	0	0	0	0	0	0.926	1.026	0.988	1.032	1.357	1.030	0.943	0.000	0.000	0.000	0.000	0.000	0.000	0.000	0.000	0.000	0.000	0.000	0.000	0.000	0.000	52	340	23425	22646	-0.112	Error	Error	11260	12165	0	0	11468	11178	0	0	0	0
1	17	3	""	"YER134C"	4990	25060	90	3765	3488	1121	105	113	53	100	100	0	7450	7011	1430	91	99	43	100	100	0	0	0	0	0	0	0	0	0	0	0	0	0	0	0	0	0	0	0	0.497	0.489	0.498	0.466	1.307	0.505	0.912	0.000	0.000	0.000	0.000	0.000	0.000	0.000	0.000	0.000	0.000	0.000	0.000	0.000	0.000	52	420	11019	10303	-1.008	Error	Error	3660	7359	0	0	3383	6920	0	0	0	0
1	18	3	""	"YER166W"	5190	25060	90	191	190	77	102	109	49	63	42	0	257	254	111	80	91	42	88	75	0	0	0	0	0	0	0	0	0	0	0	0	0	0	0	0	0	0	0	0.503	0.506	0.587	0.499	3.338	0.536	0.197	0.000	0.000	0.000	0.000	0.000	0.000	0.000	0.000	0.000	0.000	0.000	0.000	0.000	0.000	52	420	266	262	-0.992	Error	Error	89	177	0	0	88	174	0	0	0	0
1	19	3	"AMS1"	"YGL156W"	5370	25060	60	2893	4075	4108	97	158	362	96	81	0	2760	5557	6331	75	218	742	100	68	0	0	0	0	0	0	0	0	0	0	0	0	0	0	0	0	0	0	0	1.041	0.726	0.741	0.737	1.883	0.634	0.823	0.000	0.000	0.000	0.000	0.000	0.000	0.000	0.000	0.000	0.000	0.000	0.000	0.000	0.000	32	176	5481	9460	0.058	Error	Error	2796	2685	0	0	3978	5482	0	0	0	0
1	20	3	""	"YGL188C"	5580	25050	70	375	424	200	94	98	46	96	93	0	806	1013	523	71	91	117	100	100	0	0	0	0	0	0	0	0	0	0	0	0	0	0	0	0	0	0	0	0.382	0.350	0.310	0.329	1.647	0.330	0.757	0.000	0.000	0.000	0.000	0.000	0.000	0.000	0.000	0.000	0.000	0.000	0.000	0.000	0.000	32	236	1016	1272	-1.387	Error	Error	281	735	0	0	330	942	0	0	0	0
1	21	3	""	"YGL220W"	5800	25050	80	4580	4232	1486	89	95	42	100	100	0	10391	9742	3403	69	73	26	100	100	0	0	0	0	0	0	0	0	0	0	0	0	0	0	0	0	0	0	0	0.435	0.428	0.447	0.436	1.319	0.419	0.919	0.000	0.000	0.000	0.000	0.000	0.000	0.000	0.000	0.000	0.000	0.000	0.000	0.000	0.000	52	320	14813	13816	-1.201	Error	Error	4491	10322	0	0	4143	9673	0	0	0	0
1	1	4	"RCK1"	"YGL158W"	1800	25270	80	14969	13358	4908	96	102	45	100	100	0	20765	18471	6502	80	88	36	100	100	0	0	0	0	0	0	0	0	0	0	0	0	0	0	0	0	0	0	0	0.719	0.721	0.721	0.715	1.244	0.724	0.960	0.000	0.000	0.000	0.000	0.000	0.000	0.000	0.000	0.000	0.000	0.000	0.000	0.000	0.000	52	340	35558	31653	-0.476	Error	Error	14873	20685	0	0	13262	18391	0	0	0	0
1	2	4	"CDC55"	"YGL190C"	1980	25270	70	3808	3973	2412	105	113	56	100	100	0	5457	5800	3803	87	125	228	100	100	0	0	0	0	0	0	0	0	0	0	0	0	0	0	0	0	0	0	0	0.690	0.677	0.661	0.685	1.423	0.643	0.913	0.000	0.000	0.000	0.000	0.000	0.000	0.000	0.000	0.000	0.000	0.000	0.000	0.000	0.000	32	236	9073	9581	-0.536	Error	Error	3703	5370	0	0	3868	5713	0	0	0	0
1	3	4	""	"YGL222C"	2180	25280	90	9429	8512	3083	96	109	79	100	100	0	16073	13544	5026	82	120	307	100	100	0	0	0	0	0	0	0	0	0	0	0	0	0	0	0	0	0	0	0	0.584	0.625	0.608	0.625	1.367	0.624	0.938	0.000	0.000	0.000	0.000	0.000	0.000	0.000	0.000	0.000	0.000	0.000	0.000	0.000	0.000	52	420	25324	21878	-0.777	Error	Error	9333	15991	0	0	8416	13462	0	0	0	0
1	4	4	""	"YGL160W"	2380	25270	80	11182	10478	4100	99	104	46	100	100	0	16077	15372	6197	78	97	123	100	100	0	0	0	0	0	0	0	0	0	0	0	0	0	0	0	0	0	0	0	0.693	0.679	0.671	0.690	1.294	0.639	0.955	0.000	0.000	0.000	0.000	0.000	0.000	0.000	0.000	0.000	0.000	0.000	0.000	0.000	0.000	52	340	27082	25673	-0.530	Error	Error	11083	15999	0	0	10379	15294	0	0	0	0
1	5	4	"IME4"	"YGL192W"	2590	25260	110	13220	11006	5651	101	293	1477	90	86	0	15087	13321	6747	80	282	1659	90	88	0	0	0	0	0	0	0	0	0	0	0	0	0	0	0	0	0	0	0	0.874	0.824	0.838	0.988	2.325	0.827	0.922	0.000	0.000	0.000	0.000	0.000	0.000	0.000	0.000	0.000	0.000	0.000	0.000	0.000	0.000	80	617	28126	24146	-0.194	Error	Error	13119	15007	0	0	10905	13241	0	0	0	0
1	6	4	""	"YGL224C"	2790	25260	90	21176	19015	5604	105	138	337	100	100	0	12492	11365	3251	80	93	61	100	100	0	0	0	0	0	0	0	0	0	0	0	0	0	0	0	0	0	0	0	1.698	1.676	1.701	1.676	1.307	1.672	0.943	0.000	0.000	0.000	0.000	0.000	0.000	0.000	0.000	0.000	0.000	0.000	0.000	0.000	0.000	52	420	33483	30195	0.764	Error	Error	21071	12412	0	0	18910	11285	0	0	0	0
1	7	4	"SUT1"	"YGL162W"	2990	25270	80	4321	4707	2524	101	105	50	100	100	0	8727	8652	4367	80	89	40	100	100	0	0	0	0	0	0	0	0	0	0	0	0	0	0	0	0	0	0	0	0.488	0.537	0.540	0.536	1.438	0.523	0.881	0.000	0.000	0.000	0.000	0.000	0.000	0.000	0.000	0.000	0.000	0.000	0.000	0.000	0.000	52	340	12867	13178	-1.035	Error	Error	4220	8647	0	0	4606	8572	0	0	0	0
1	8	4	"HOS2"	"YGL194C"	3170	25270	90	20114	17423	5592	106	119	123	100	100	0	11656	9968	3733	89	124	241	100	100	0	0	0	0	0	0	0	0	0	0	0	0	0	0	0	0	0	0	0	1.730	1.753	1.732	1.854	1.476	1.692	0.949	0.000	0.000	0.000	0.000	0.000	0.000	0.000	0.000	0.000	0.000	0.000	0.000	0.000	0.000	52	414	31575	27196	0.791	Error	Error	20008	11567	0	0	17317	9879	0	0	0	0
1	9	4	""	"YGL226W"	3390	25270	80	7223	6444	2595	107	111	48	100	100	0	8698	7873	3213	93	108	57	100	100	0	0	0	0	0	0	0	0	0	0	0	0	0	0	0	0	0	0	0	0.827	0.815	0.811	0.827	1.318	0.789	0.912	0.000	0.000	0.000	0.000	0.000	0.000	0.000	0.000	0.000	0.000	0.000	0.000	0.000	0.000	52	340	15721	14117	-0.274	Error	Error	7116	8605	0	0	6337	7780	0	0	0	0
1	10	4	""	"YGR277C"	3590	25270	80	8831	8293	2338	105	110	48	100	100	0	16064	15123	3668	81	92	43	100	100	0	0	0	0	0	0	0	0	0	0	0	0	0	0	0	0	0	0	0	0.546	0.544	0.536	0.533	1.220	0.534	0.937	0.000	0.000	0.000	0.000	0.000	0.000	0.000	0.000	0.000	0.000	0.000	0.000	0.000	0.000	52	340	24709	23230	-0.873	Error	Error	8726	15983	0	0	8188	15042	0	0	0	0
1	11	4	""	"YHL013C"	3770	25270	80	27481	25248	10704	112	187	705	100	100	0	10253	8582	3863	83	150	539	96	96	0	0	0	0	0	0	0	0	0	0	0	0	0	0	0	0	0	0	0	2.691	2.958	2.795	3.105	1.892	2.892	0.906	0.000	0.000	0.000	0.000	0.000	0.000	0.000	0.000	0.000	0.000	0.000	0.000	0.000	0.000	52	340	37539	33635	1.428	Error	Error	27369	10170	0	0	25136	8499	0	0	0	0
1	12	4	""	"YHL045W"	3990	25270	80	20052	17833	7236	102	159	656	100	100	0	16450	15021	4625	84	109	216	100	100	0	0	0	0	0	0	0	0	0	0	0	0	0	0	0	0	0	0	0	1.219	1.187	1.215	1.121	1.297	1.262	0.933	0.000	0.000	0.000	0.000	0.000	0.000	0.000	0.000	0.000	0.000	0.000	0.000	0.000	0.000	52	340	36316	32668	0.286	Error	Error	19950	16366	0	0	17731	14937	0	0	0	0
1	13	4	"SCW4"	"YGR279C"	4180	25270	80	8970	8125	3087	98	103	42	100	100	0	10063	9207	3193	77	86	36	100	100	0	0	0	0	0	0	0	0	0	0	0	0	0	0	0	0	0	0	0	0.888	0.879	0.871	0.838	1.308	0.857	0.951	0.000	0.000	0.000	0.000	0.000	0.000	0.000	0.000	0.000	0.000	0.000	0.000	0.000	0.000	52	340	18858	17157	-0.171	Error	Error	8872	9986	0	0	8027	9130	0	0	0	0
1	14	4	"RPS20"	"YHL015W"	4380	25270	90	6918	6133	2423	96	101	42	100	100	0	4069	3566	1177	75	85	40	100	100	0	0	0	0	0	0	0	0	0	0	0	0	0	0	0	0	0	0	0	1.708	1.729	1.786	1.635	1.311	1.870	0.913	0.000	0.000	0.000	0.000	0.000	0.000	0.000	0.000	0.000	0.000	0.000	0.000	0.000	0.000	52	420	10816	9528	0.772	Error	Error	6822	3994	0	0	6037	3491	0	0	0	0
1	15	4	""	"YHL047C"	4590	25260	80	18913	17768	7769	100	106	48	100	100	0	18353	15869	7082	76	86	46	100	100	0	0	0	0	0	0	0	0	0	0	0	0	0	0	0	0	0	0	0	1.029	1.119	1.157	1.177	1.655	1.123	0.938	0.000	0.000	0.000	0.000	0.000	0.000	0.000	0.000	0.000	0.000	0.000	0.000	0.000	0.000	52	340	37090	33461	0.042	Error	Error	18813	18277	0	0	17668	15793	0	0	0	0
1	16	4	"YOR1"	"YGR281W"	4790	25260	90	4843	4956	3302	103	112	59	100	100	0	3951	4135	2815	84	103	64	98	98	0	0	0	0	0	0	0	0	0	0	0	0	0	0	0	0	0	0	0	1.226	1.198	1.200	1.285	2.053	1.246	0.805	0.000	0.000	0.000	0.000	0.000	0.000	0.000	0.000	0.000	0.000	0.000	0.000	0.000	0.000	52	420	8607	8904	0.294	Error	Error	4740	3867	0	0	4853	4051	0	0	0	0
1	17	4	""	"YHL017W"	4990	25260	80	32082	31173	12375	109	129	122	100	100	0	13321	12329	3905	92	102	49	100	100	0	0	0	0	0	0	0	0	0	0	0	0	0	0	0	0	0	0	0	2.417	2.539	2.580	2.410	1.299	2.729	0.938	0.000	0.000	0.000	0.000	0.000	0.000	0.000	0.000	0.000	0.000	0.000	0.000	0.000	0.000	52	340	45202	43301	1.273	Error	Error	31973	13229	0	0	31064	12237	0	0	0	0
1	18	4	""	"YHL049C"	5170	25260	90	56865	48248	19012	112	259	1486	100	100	5	62818	53221	17937	93	484	3667	98	96	36	0	0	0	0	0	0	0	0	0	0	0	0	0	0	0	0	0	0	0.905	0.906	0.933	0.908	1.782	0.915	0.929	0.000	0.000	0.000	0.000	0.000	0.000	0.000	0.000	0.000	0.000	0.000	0.000	0.000	0.000	52	414	119478	101264	-0.144	Error	Error	56753	62725	0	0	48136	53128	0	0	0	0
1	19	4	""	"YGR283C"	5380	25260	100	11700	10227	3707	97	202	1295	98	95	0	14032	12497	3848	77	358	3196	96	88	0	0	0	0	0	0	0	0	0	0	0	0	0	0	0	0	0	0	0	0.831	0.816	0.834	0.790	1.425	0.826	0.948	0.000	0.000	0.000	0.000	0.000	0.000	0.000	0.000	0.000	0.000	0.000	0.000	0.000	0.000	80	546	25558	22550	-0.266	Error	Error	11603	13955	0	0	10130	12420	0	0	0	0
1	20	4	"APM2"	"YHL019C"	5570	25260	80	16171	15013	4231	101	104	45	100	100	0	15965	14588	3797	70	76	29	100	100	0	0	0	0	0	0	0	0	0	0	0	0	0	0	0	0	0	0	0	1.011	1.027	1.049	1.018	1.267	1.010	0.941	0.000	0.000	0.000	0.000	0.000	0.000	0.000	0.000	0.000	0.000	0.000	0.000	0.000	0.000	52	340	31965	29430	0.016	Error	Error	16070	15895	0	0	14912	14518	0	0	0	0
1	21	4	""	"YHR001W"	5790	25250	80	33689	30389	10337	91	97	41	100	100	0	7100	6362	2017	68	71	22	100	100	0	0	0	0	0	0	0	0	0	0	0	0	0	0	0	0	0	0	0	4.778	4.814	4.774	4.735	1.203	4.987	0.941	0.000	0.000	0.000	0.000	0.000	0.000	0.000	0.000	0.000	0.000	0.000	0.000	0.000	0.000	52	332	40630	36592	2.256	Error	Error	33598	7032	0	0	30298	6294	0	0	0	0
1	1	5	""	"YIL087C"	1780	25480	90	11405	10707	3736	94	98	43	100	100	0	15487	13700	4648	75	84	37	100	100	0	0	0	0	0	0	0	0	0	0	0	0	0	0	0	0	0	0	0	0.734	0.779	0.775	0.761	1.358	0.761	0.929	0.000	0.000	0.000	0.000	0.000	0.000	0.000	0.000	0.000	0.000	0.000	0.000	0.000	0.000	52	420	26723	24238	-0.446	Error	Error	11311	15412	0	0	10613	13625	0	0	0	0
1	2	5	"RPI1"	"YIL119C"	1980	25480	80	4838	4841	1488	99	102	43	100	100	0	6620	6524	2077	75	83	34	100	100	0	0	0	0	0	0	0	0	0	0	0	0	0	0	0	0	0	0	0	0.724	0.735	0.724	0.740	1.281	0.713	0.916	0.000	0.000	0.000	0.000	0.000	0.000	0.000	0.000	0.000	0.000	0.000	0.000	0.000	0.000	52	340	11284	11191	-0.466	Error	Error	4739	6545	0	0	4742	6449	0	0	0	0
1	3	5	""	"YIL151C"	2190	25470	70	192	235	167	99	108	62	59	40	0	206	265	168	81	95	63	81	46	0	0	0	0	0	0	0	0	0	0	0	0	0	0	0	0	0	0	0	0.744	0.739	0.675	0.672	2.484	0.752	0.283	0.000	0.000	0.000	0.000	0.000	0.000	0.000	0.000	0.000	0.000	0.000	0.000	0.000	0.000	32	236	218	320	-0.427	Error	Error	93	125	0	0	136	184	0	0	0	0
1	4	5	""	"YIL089W"	2400	25470	90	13060	12367	4813	103	128	218	100	100	0	9669	8571	3562	79	89	45	100	100	0	0	0	0	0	0	0	0	0	0	0	0	0	0	0	0	0	0	0	1.351	1.444	1.416	1.486	1.411	1.427	0.947	0.000	0.000	0.000	0.000	0.000	0.000	0.000	0.000	0.000	0.000	0.000	0.000	0.000	0.000	52	420	22547	20756	0.434	Error	Error	12957	9590	0	0	12264	8492	0	0	0	0
1	5	5	""	"YIL121W"	2590	25470	90	21005	18498	9836	97	104	49	100	100	0	9095	8598	4675	75	84	42	100	98	0	0	0	0	0	0	0	0	0	0	0	0	0	0	0	0	0	0	0	2.318	2.159	2.083	2.345	1.666	2.162	0.952	0.000	0.000	0.000	0.000	0.000	0.000	0.000	0.000	0.000	0.000	0.000	0.000	0.000	0.000	52	420	29928	26924	1.213	Error	Error	20908	9020	0	0	18401	8523	0	0	0	0
1	6	5	"RRD1"	"YIL153W"	2790	25470	80	9772	8743	3541	89	97	42	100	100	0	6197	5464	2137	71	79	33	100	100	0	0	0	0	0	0	0	0	0	0	0	0	0	0	0	0	0	0	0	1.581	1.605	1.666	1.635	1.375	1.634	0.954	0.000	0.000	0.000	0.000	0.000	0.000	0.000	0.000	0.000	0.000	0.000	0.000	0.000	0.000	52	340	15809	14047	0.661	Error	Error	9683	6126	0	0	8654	5393	0	0	0	0
1	7	5	""	"YIL091C"	3000	25470	80	15287	14658	6860	92	101	50	100	100	0	14016	12770	5367	79	89	47	100	100	0	0	0	0	0	0	0	0	0	0	0	0	0	0	0	0	0	0	0	1.090	1.148	1.169	1.110	1.396	1.183	0.946	0.000	0.000	0.000	0.000	0.000	0.000	0.000	0.000	0.000	0.000	0.000	0.000	0.000	0.000	52	340	29132	27257	0.125	Error	Error	15195	13937	0	0	14566	12691	0	0	0	0
1	8	5	"SIM1"	"YIL123W"	3180	25460	70	13021	11883	3231	98	120	182	100	100	0	20896	19512	3762	81	128	403	100	100	0	0	0	0	0	0	0	0	0	0	0	0	0	0	0	0	0	0	0	0.621	0.607	0.615	0.587	1.206	0.592	0.937	0.000	0.000	0.000	0.000	0.000	0.000	0.000	0.000	0.000	0.000	0.000	0.000	0.000	0.000	32	236	33738	31216	-0.688	Error	Error	12923	20815	0	0	11785	19431	0	0	0	0
1	9	5	"GUT2"	"YIL155C"	3370	25460	70	15575	14064	4840	102	186	572	100	100	0	7948	7095	2017	86	183	608	100	100	0	0	0	0	0	0	0	0	0	0	0	0	0	0	0	0	0	0	0	1.968	1.992	1.995	1.910	1.242	1.996	0.940	0.000	0.000	0.000	0.000	0.000	0.000	0.000	0.000	0.000	0.000	0.000	0.000	0.000	0.000	32	236	23335	20971	0.977	Error	Error	15473	7862	0	0	13962	7009	0	0	0	0
1	10	5	""	"YIL093C"	3580	25460	70	2283	2496	1010	95	138	367	100	100	0	4273	4635	1819	78	123	473	100	100	0	0	0	0	0	0	0	0	0	0	0	0	0	0	0	0	0	0	0	0.522	0.527	0.508	0.522	1.289	0.533	0.815	0.000	0.000	0.000	0.000	0.000	0.000	0.000	0.000	0.000	0.000	0.000	0.000	0.000	0.000	32	236	6383	6958	-0.939	Error	Error	2188	4195	0	0	2401	4557	0	0	0	0
1	11	5	"KGD1"	"YIL125W"	3780	25470	60	8758	8483	3997	96	106	58	100	100	0	15492	13685	5625	79	99	189	100	100	0	0	0	0	0	0	0	0	0	0	0	0	0	0	0	0	0	0	0	0.562	0.616	0.613	0.572	1.448	0.620	0.936	0.000	0.000	0.000	0.000	0.000	0.000	0.000	0.000	0.000	0.000	0.000	0.000	0.000	0.000	32	176	24075	21993	-0.831	Error	Error	8662	15413	0	0	8387	13606	0	0	0	0
1	12	5	""	"YIL157C"	3980	25460	80	14281	12458	5425	95	103	44	100	100	0	13093	11348	4658	74	81	32	100	100	0	0	0	0	0	0	0	0	0	0	0	0	0	0	0	0	0	0	0	1.090	1.097	1.106	1.132	1.425	1.117	0.929	0.000	0.000	0.000	0.000	0.000	0.000	0.000	0.000	0.000	0.000	0.000	0.000	0.000	0.000	52	340	27205	23637	0.124	Error	Error	14186	13019	0	0	12363	11274	0	0	0	0
1	13	5	""	"YJR026W"	4180	25460	70	1967	4571	6034	91	96	41	100	96	0	2948	7054	8470	74	80	31	100	100	0	0	0	0	0	0	0	0	0	0	0	0	0	0	0	0	0	0	0	0.653	0.642	0.520	0.522	1.812	0.671	0.867	0.000	0.000	0.000	0.000	0.000	0.000	0.000	0.000	0.000	0.000	0.000	0.000	0.000	0.000	32	236	4750	11460	-0.615	Error	Error	1876	2874	0	0	4480	6980	0	0	0	0
1	14	5	"APS2"	"YJR058C"	4370	25460	70	3109	3470	2770	95	107	68	100	100	0	6084	7441	6042	72	104	172	100	96	0	0	0	0	0	0	0	0	0	0	0	0	0	0	0	0	0	0	0	0.501	0.458	0.433	0.481	1.460	0.436	0.934	0.000	0.000	0.000	0.000	0.000	0.000	0.000	0.000	0.000	0.000	0.000	0.000	0.000	0.000	32	236	9026	10744	-0.996	Error	Error	3014	6012	0	0	3375	7369	0	0	0	0
1	15	5	"JSN1"	"YJR091C"	4580	25450	60	227	278	209	94	98	49	75	59	0	354	431	326	76	80	27	96	87	0	0	0	0	0	0	0	0	0	0	0	0	0	0	0	0	0	0	0	0.478	0.518	0.483	0.442	2.800	0.574	0.726	0.000	0.000	0.000	0.000	0.000	0.000	0.000	0.000	0.000	0.000	0.000	0.000	0.000	0.000	32	176	411	539	-1.064	Error	Error	133	278	0	0	184	355	0	0	0	0
1	16	5	""	"YJR028W"	4780	25460	80	354	1344	3072	99	104	50	84	75	0	557	1903	4554	79	89	60	88	82	0	0	0	0	0	0	0	0	0	0	0	0	0	0	0	0	0	0	0	0.533	0.683	0.700	0.556	2.891	0.599	0.566	0.000	0.000	0.000	0.000	0.000	0.000	0.000	0.000	0.000	0.000	0.000	0.000	0.000	0.000	52	340	733	3069	-0.907	Error	Error	255	478	0	0	1245	1824	0	0	0	0
1	17	5	"CBF1"	"YJR060W"	4970	25460	70	243	301	203	97	106	52	78	65	0	428	503	285	85	92	37	93	93	0	0	0	0	0	0	0	0	0	0	0	0	0	0	0	0	0	0	0	0.426	0.488	0.475	0.420	2.159	0.550	0.669	0.000	0.000	0.000	0.000	0.000	0.000	0.000	0.000	0.000	0.000	0.000	0.000	0.000	0.000	32	236	489	622	-1.232	Error	Error	146	343	0	0	204	418	0	0	0	0
1	18	5	"FIP1"	"YJR093C"	5180	25450	60	305	466	482	108	118	60	87	68	0	370	483	423	82	96	48	90	84	0	0	0	0	0	0	0	0	0	0	0	0	0	0	0	0	0	0	0	0.684	0.893	0.820	0.950	3.306	1.065	0.742	0.000	0.000	0.000	0.000	0.000	0.000	0.000	0.000	0.000	0.000	0.000	0.000	0.000	0.000	32	176	485	759	-0.548	Error	Error	197	288	0	0	358	401	0	0	0	0
1	19	5	""	"YJR030C"	5380	25460	70	332	623	729	96	104	49	90	71	0	389	739	817	69	78	32	100	100	0	0	0	0	0	0	0	0	0	0	0	0	0	0	0	0	0	0	0	0.738	0.787	0.614	0.627	1.925	0.849	0.882	0.000	0.000	0.000	0.000	0.000	0.000	0.000	0.000	0.000	0.000	0.000	0.000	0.000	0.000	32	236	556	1197	-0.439	Error	Error	236	320	0	0	527	670	0	0	0	0
1	20	5	"NTA1"	"YJR062C"	5590	25450	70	246	597	772	96	99	45	84	68	0	309	652	803	68	73	26	100	93	0	0	0	0	0	0	0	0	0	0	0	0	0	0	0	0	0	0	0	0.622	0.858	0.738	0.712	2.438	0.921	0.561	0.000	0.000	0.000	0.000	0.000	0.000	0.000	0.000	0.000	0.000	0.000	0.000	0.000	0.000	32	236	391	1085	-0.684	Error	Error	150	241	0	0	501	584	0	0	0	0
1	21	5	"RPL43B"	"YJR094W-A"	5790	25450	70	574	2339	3677	94	101	51	96	96	0	744	2100	3229	65	75	39	100	96	0	0	0	0	0	0	0	0	0	0	0	0	0	0	0	0	0	0	0	0.707	1.103	0.927	0.956	1.923	1.142	0.880	0.000	0.000	0.000	0.000	0.000	0.000	0.000	0.000	0.000	0.000	0.000	0.000	0.000	0.000	32	230	1159	4280	-0.500	Error	Error	480	679	0	0	2245	2035	0	0	0	0
1	1	6	"CPR7"	"YJR032W"	1780	25670	70	498	1076	1078	98	98	38	100	93	0	828	1530	1530	74	80	30	100	100	0	0	0	0	0	0	0	0	0	0	0	0	0	0	0	0	0	0	0	0.531	0.672	0.591	0.598	1.790	0.656	0.733	0.000	0.000	0.000	0.000	0.000	0.000	0.000	0.000	0.000	0.000	0.000	0.000	0.000	0.000	32	236	1154	2434	-0.915	Error	Error	400	754	0	0	978	1456	0	0	0	0
1	2	6	"CCT5"	"YJR064W"	1980	25670	70	1003	2436	3441	93	98	46	100	100	0	1447	3288	4566	77	92	60	100	100	0	0	0	0	0	0	0	0	0	0	0	0	0	0	0	0	0	0	0	0.664	0.730	0.633	0.645	1.699	0.733	0.867	0.000	0.000	0.000	0.000	0.000	0.000	0.000	0.000	0.000	0.000	0.000	0.000	0.000	0.000	32	236	2280	5554	-0.590	Error	Error	910	1370	0	0	2343	3211	0	0	0	0
1	3	6	""	"YJR096W"	2180	25670	80	1198	2346	2655	95	101	45	98	98	0	1651	3294	3658	76	86	42	100	100	0	0	0	0	0	0	0	0	0	0	0	0	0	0	0	0	0	0	0	0.700	0.700	0.608	0.621	1.695	0.702	0.886	0.000	0.000	0.000	0.000	0.000	0.000	0.000	0.000	0.000	0.000	0.000	0.000	0.000	0.000	52	340	2678	5469	-0.514	Error	Error	1103	1575	0	0	2251	3218	0	0	0	0
1	4	6	""	"YKR021W"	2390	25670	70	1383	2926	3084	105	114	58	100	100	0	2078	3625	3964	81	95	67	100	100	0	0	0	0	0	0	0	0	0	0	0	0	0	0	0	0	0	0	0	0.640	0.796	0.669	0.690	1.545	0.774	0.874	0.000	0.000	0.000	0.000	0.000	0.000	0.000	0.000	0.000	0.000	0.000	0.000	0.000	0.000	32	236	3275	6365	-0.644	Error	Error	1278	1997	0	0	2821	3544	0	0	0	0
1	5	6	"YSR3"	"YKR053C"	2580	25670	70	429	1144	1920	92	100	49	93	87	0	617	1325	1717	72	84	77	100	96	0	0	0	0	0	0	0	0	0	0	0	0	0	0	0	0	0	0	0	0.618	0.840	0.581	0.600	1.962	1.044	0.897	0.000	0.000	0.000	0.000	0.000	0.000	0.000	0.000	0.000	0.000	0.000	0.000	0.000	0.000	32	236	882	2305	-0.694	Error	Error	337	545	0	0	1052	1253	0	0	0	0
1	6	6	"MRPL20"	"YKR085C"	2780	25670	60	511	1057	1056	83	87	37	96	96	0	767	1639	1632	70	78	33	100	100	0	0	0	0	0	0	0	0	0	0	0	0	0	0	0	0	0	0	0	0.614	0.621	0.574	0.589	1.814	0.619	0.874	0.000	0.000	0.000	0.000	0.000	0.000	0.000	0.000	0.000	0.000	0.000	0.000	0.000	0.000	32	176	1125	2543	-0.704	Error	Error	428	697	0	0	974	1569	0	0	0	0
1	7	6	""	"YKR023W"	2990	25670	80	15551	16443	8804	97	103	47	100	100	0	10231	9930	4545	73	81	34	100	100	0	0	0	0	0	0	0	0	0	0	0	0	0	0	0	0	0	0	0	1.521	1.658	1.639	1.641	1.467	1.746	0.951	0.000	0.000	0.000	0.000	0.000	0.000	0.000	0.000	0.000	0.000	0.000	0.000	0.000	0.000	52	340	25612	26203	0.605	Error	Error	15454	10158	0	0	16346	9857	0	0	0	0
1	8	6	"RHO4"	"YKR055W"	3170	25670	60	339	391	213	95	96	38	93	90	0	458	553	296	71	77	30	100	100	0	0	0	0	0	0	0	0	0	0	0	0	0	0	0	0	0	0	0	0.630	0.614	0.612	0.551	1.874	0.632	0.790	0.000	0.000	0.000	0.000	0.000	0.000	0.000	0.000	0.000	0.000	0.000	0.000	0.000	0.000	32	176	631	778	-0.665	Error	Error	244	387	0	0	296	482	0	0	0	0
1	9	6	""	"YKR087C"	3370	25670	80	1937	4596	6093	90	97	45	100	98	0	1326	3155	3900	73	81	35	98	98	0	0	0	0	0	0	0	0	0	0	0	0	0	0	0	0	0	0	0	1.474	1.462	1.181	1.239	1.694	1.564	0.904	0.000	0.000	0.000	0.000	0.000	0.000	0.000	0.000	0.000	0.000	0.000	0.000	0.000	0.000	52	340	3100	7588	0.560	Error	Error	1847	1253	0	0	4506	3082	0	0	0	0
1	10	6	"RPC37"	"YKR025W"	3570	25660	70	5284	5059	3608	93	103	70	100	96	0	7014	7632	5340	79	109	210	100	100	0	0	0	0	0	0	0	0	0	0	0	0	0	0	0	0	0	0	0	0.749	0.657	0.642	0.594	1.698	0.628	0.855	0.000	0.000	0.000	0.000	0.000	0.000	0.000	0.000	0.000	0.000	0.000	0.000	0.000	0.000	32	236	12126	12519	-0.418	Error	Error	5191	6935	0	0	4966	7553	0	0	0	0
1	11	6	"RPS21A"	"YKR057W"	3770	25660	70	2623	2981	2288	91	99	51	100	100	0	4631	5729	4373	71	86	83	100	100	0	0	0	0	0	0	0	0	0	0	0	0	0	0	0	0	0	0	0	0.555	0.511	0.528	0.474	1.518	0.500	0.928	0.000	0.000	0.000	0.000	0.000	0.000	0.000	0.000	0.000	0.000	0.000	0.000	0.000	0.000	32	236	7092	8548	-0.849	Error	Error	2532	4560	0	0	2890	5658	0	0	0	0
1	12	6	""	"YKR089C"	3980	25660	70	394	693	941	86	93	41	90	90	0	434	836	986	69	75	29	100	100	0	0	0	0	0	0	0	0	0	0	0	0	0	0	0	0	0	0	0	0.844	0.791	0.701	0.612	2.788	0.829	0.275	0.000	0.000	0.000	0.000	0.000	0.000	0.000	0.000	0.000	0.000	0.000	0.000	0.000	0.000	32	236	673	1374	-0.245	Error	Error	308	365	0	0	607	767	0	0	0	0
1	13	6	""	"YKR027W"	4190	25660	80	3524	4368	3236	93	95	39	100	100	0	6073	7356	5440	70	75	27	100	100	0	0	0	0	0	0	0	0	0	0	0	0	0	0	0	0	0	0	0	0.572	0.587	0.546	0.590	1.552	0.563	0.854	0.000	0.000	0.000	0.000	0.000	0.000	0.000	0.000	0.000	0.000	0.000	0.000	0.000	0.000	52	340	9434	11561	-0.807	Error	Error	3431	6003	0	0	4275	7286	0	0	0	0
1	14	6	"TIF1"	"YKR059W"	4370	25660	70	489	1469	2212	89	96	40	96	93	0	920	2553	3800	66	75	43	100	100	0	0	0	0	0	0	0	0	0	0	0	0	0	0	0	0	0	0	0	0.468	0.555	0.505	0.487	1.951	0.553	0.855	0.000	0.000	0.000	0.000	0.000	0.000	0.000	0.000	0.000	0.000	0.000	0.000	0.000	0.000	32	236	1254	3867	-1.094	Error	Error	400	854	0	0	1380	2487	0	0	0	0
1	15	6	"SRL3"	"YKR091W"	4570	25660	70	240	659	948	94	97	40	93	71	0	409	1160	2020	70	75	33	100	100	0	0	0	0	0	0	0	0	0	0	0	0	0	0	0	0	0	0	0	0.431	0.518	0.450	0.440	2.527	0.444	0.780	0.000	0.000	0.000	0.000	0.000	0.000	0.000	0.000	0.000	0.000	0.000	0.000	0.000	0.000	32	236	485	1655	-1.215	Error	Error	146	339	0	0	565	1090	0	0	0	0
1	16	6	""	"YLR232W"	4780	25660	80	2624	2450	938	98	103	41	100	100	0	4607	4155	1484	80	87	37	100	100	0	0	0	0	0	0	0	0	0	0	0	0	0	0	0	0	0	0	0	0.558	0.577	0.567	0.567	1.338	0.557	0.915	0.000	0.000	0.000	0.000	0.000	0.000	0.000	0.000	0.000	0.000	0.000	0.000	0.000	0.000	52	340	7053	6427	-0.842	Error	Error	2526	4527	0	0	2352	4075	0	0	0	0
1	17	6	"RPS28B"	"YLR264W"	4970	25650	70	3745	3537	1588	99	227	765	90	78	0	5457	4933	2153	83	302	1137	93	81	0	0	0	0	0	0	0	0	0	0	0	0	0	0	0	0	0	0	0	0.678	0.709	0.684	0.667	1.464	0.701	0.887	0.000	0.000	0.000	0.000	0.000	0.000	0.000	0.000	0.000	0.000	0.000	0.000	0.000	0.000	32	236	9020	8288	-0.560	Error	Error	3646	5374	0	0	3438	4850	0	0	0	0
1	18	6	"ATP14"	"YLR295C"	5180	25660	80	1311	1349	870	97	147	252	88	76	0	3317	3639	2646	84	189	579	90	76	0	0	0	0	0	0	0	0	0	0	0	0	0	0	0	0	0	0	0	0.376	0.352	0.326	0.371	1.633	0.313	0.867	0.000	0.000	0.000	0.000	0.000	0.000	0.000	0.000	0.000	0.000	0.000	0.000	0.000	0.000	52	340	4447	4807	-1.413	Error	Error	1214	3233	0	0	1252	3555	0	0	0	0
1	19	6	"TOP3"	"YLR234W"	5380	25660	80	4171	3759	1743	90	98	46	100	100	0	7622	6644	2565	74	81	31	100	100	0	0	0	0	0	0	0	0	0	0	0	0	0	0	0	0	0	0	0	0.541	0.558	0.547	0.518	1.415	0.566	0.936	0.000	0.000	0.000	0.000	0.000	0.000	0.000	0.000	0.000	0.000	0.000	0.000	0.000	0.000	52	340	11629	10239	-0.887	Error	Error	4081	7548	0	0	3669	6570	0	0	0	0
1	20	6	""	"YLR266C"	5590	25650	70	1292	1952	1566	88	109	109	100	96	0	1837	2755	2618	70	92	163	100	100	0	0	0	0	0	0	0	0	0	0	0	0	0	0	0	0	0	0	0	0.681	0.694	0.666	0.697	1.625	0.599	0.763	0.000	0.000	0.000	0.000	0.000	0.000	0.000	0.000	0.000	0.000	0.000	0.000	0.000	0.000	32	236	2971	4549	-0.553	Error	Error	1204	1767	0	0	1864	2685	0	0	0	0
1	21	6	""	"YLR297W"	5780	25660	80	2995	2944	1342	90	96	41	100	100	0	5540	4783	1967	69	73	26	100	100	0	0	0	0	0	0	0	0	0	0	0	0	0	0	0	0	0	0	0	0.531	0.605	0.612	0.571	1.459	0.592	0.910	0.000	0.000	0.000	0.000	0.000	0.000	0.000	0.000	0.000	0.000	0.000	0.000	0.000	0.000	52	340	8376	7568	-0.913	Error	Error	2905	5471	0	0	2854	4714	0	0	0	0
1	1	7	""	"YLR236C"	1780	25880	80	902	866	287	92	102	66	98	98	0	2840	2687	682	78	130	359	100	98	0	0	0	0	0	0	0	0	0	0	0	0	0	0	0	0	0	0	0	0.293	0.297	0.295	0.283	1.452	0.303	0.853	0.000	0.000	0.000	0.000	0.000	0.000	0.000	0.000	0.000	0.000	0.000	0.000	0.000	0.000	52	340	3572	3383	-1.770	Error	Error	810	2762	0	0	774	2609	0	0	0	0
1	2	7	"SEC22"	"YLR268W"	1970	25880	80	9964	9118	2555	97	111	71	100	100	0	15417	14004	3513	87	153	403	100	100	0	0	0	0	0	0	0	0	0	0	0	0	0	0	0	0	0	0	0	0.644	0.648	0.648	0.637	1.204	0.634	0.939	0.000	0.000	0.000	0.000	0.000	0.000	0.000	0.000	0.000	0.000	0.000	0.000	0.000	0.000	52	340	25197	22938	-0.636	Error	Error	9867	15330	0	0	9021	13917	0	0	0	0
1	3	7	"ECM38"	"YLR299W"	2180	25880	80	10029	8054	4190	99	107	51	100	100	0	19686	15267	8207	87	98	52	100	100	0	0	0	0	0	0	0	0	0	0	0	0	0	0	0	0	0	0	0	0.507	0.524	0.519	0.529	1.380	0.509	0.955	0.000	0.000	0.000	0.000	0.000	0.000	0.000	0.000	0.000	0.000	0.000	0.000	0.000	0.000	52	340	29529	23135	-0.981	Error	Error	9930	19599	0	0	7955	15180	0	0	0	0
1	4	7	""	"YLR238W"	2370	25880	100	16506	14322	6684	104	110	53	100	100	0	17690	15512	6645	81	93	66	98	98	0	0	0	0	0	0	0	0	0	0	0	0	0	0	0	0	0	0	0	0.931	0.921	0.923	0.933	1.662	0.916	0.954	0.000	0.000	0.000	0.000	0.000	0.000	0.000	0.000	0.000	0.000	0.000	0.000	0.000	0.000	80	534	34011	29649	-0.102	Error	Error	16402	17609	0	0	14218	15431	0	0	0	0
1	5	7	""	"YLR270W"	2570	25880	80	11698	10587	3625	102	122	142	100	100	0	12687	12159	4135	75	146	605	100	100	0	0	0	0	0	0	0	0	0	0	0	0	0	0	0	0	0	0	0	0.919	0.868	0.835	0.848	1.402	0.827	0.917	0.000	0.000	0.000	0.000	0.000	0.000	0.000	0.000	0.000	0.000	0.000	0.000	0.000	0.000	52	340	24208	22569	-0.121	Error	Error	11596	12612	0	0	10485	12084	0	0	0	0
1	6	7	""	"YLR301W"	2770	25870	80	6643	6208	2195	91	98	44	100	100	0	8540	7635	2677	72	80	35	100	100	0	0	0	0	0	0	0	0	0	0	0	0	0	0	0	0	0	0	0	0.774	0.809	0.807	0.803	1.343	0.791	0.938	0.000	0.000	0.000	0.000	0.000	0.000	0.000	0.000	0.000	0.000	0.000	0.000	0.000	0.000	52	340	15020	13680	-0.370	Error	Error	6552	8468	0	0	6117	7563	0	0	0	0
1	7	7	"MPT1"	"YMR005W"	2970	25870	70	2550	7287	10602	95	99	42	100	96	0	803	1724	2043	73	83	39	100	93	0	0	0	0	0	0	0	0	0	0	0	0	0	0	0	0	0	0	0	3.363	4.356	3.445	2.812	2.739	5.436	0.811	0.000	0.000	0.000	0.000	0.000	0.000	0.000	0.000	0.000	0.000	0.000	0.000	0.000	0.000	32	236	3185	8843	1.750	Error	Error	2455	730	0	0	7192	1651	0	0	0	0
1	8	7	"MIH1"	"YMR036C"	3170	25880	60	305	656	725	91	96	45	84	78	0	443	752	823	76	89	45	100	96	0	0	0	0	0	0	0	0	0	0	0	0	0	0	0	0	0	0	0	0.583	0.836	0.554	0.566	3.011	0.845	0.669	0.000	0.000	0.000	0.000	0.000	0.000	0.000	0.000	0.000	0.000	0.000	0.000	0.000	0.000	32	176	581	1241	-0.778	Error	Error	214	367	0	0	565	676	0	0	0	0
1	9	7	""	"YMR067C"	3370	25870	60	432	866	1044	86	91	38	93	90	0	495	892	1021	66	76	43	100	100	0	0	0	0	0	0	0	0	0	0	0	0	0	0	0	0	0	0	0	0.807	0.944	0.967	0.790	2.362	0.998	0.826	0.000	0.000	0.000	0.000	0.000	0.000	0.000	0.000	0.000	0.000	0.000	0.000	0.000	0.000	32	176	775	1606	-0.310	Error	Error	346	429	0	0	780	826	0	0	0	0
1	10	7	""	"YMR007W"	3570	25880	80	4641	5011	2081	96	111	106	100	100	0	3706	3827	1551	74	99	175	100	100	0	0	0	0	0	0	0	0	0	0	0	0	0	0	0	0	0	0	0	1.251	1.310	1.330	1.275	1.318	1.307	0.918	0.000	0.000	0.000	0.000	0.000	0.000	0.000	0.000	0.000	0.000	0.000	0.000	0.000	0.000	52	340	8177	8668	0.324	Error	Error	4545	3632	0	0	4915	3753	0	0	0	0
1	11	7	"LYS7"	"YMR038C"	3760	25880	80	4693	4490	1453	98	100	44	100	100	0	12598	11577	3229	75	80	31	100	100	0	0	0	0	0	0	0	0	0	0	0	0	0	0	0	0	0	0	0	0.367	0.382	0.375	0.378	1.481	0.360	0.911	0.000	0.000	0.000	0.000	0.000	0.000	0.000	0.000	0.000	0.000	0.000	0.000	0.000	0.000	52	340	17118	15894	-1.446	Error	Error	4595	12523	0	0	4392	11502	0	0	0	0
1	12	7	""	"YMR069W"	3970	25870	70	1084	946	354	89	98	58	100	96	0	2987	2626	924	75	120	251	100	96	0	0	0	0	0	0	0	0	0	0	0	0	0	0	0	0	0	0	0	0.342	0.336	0.337	0.319	1.314	0.317	0.856	0.000	0.000	0.000	0.000	0.000	0.000	0.000	0.000	0.000	0.000	0.000	0.000	0.000	0.000	32	236	3907	3408	-1.549	Error	Error	995	2912	0	0	857	2551	0	0	0	0
1	13	7	""	"YMR009W"	4160	25870	70	4520	3977	1892	90	274	898	93	78	0	6549	6488	3114	72	433	1586	87	78	0	0	0	0	0	0	0	0	0	0	0	0	0	0	0	0	0	0	0	0.684	0.606	0.596	0.593	1.571	0.590	0.913	0.000	0.000	0.000	0.000	0.000	0.000	0.000	0.000	0.000	0.000	0.000	0.000	0.000	0.000	32	236	10907	10303	-0.548	Error	Error	4430	6477	0	0	3887	6416	0	0	0	0
1	14	7	""	"YMR040W"	4390	25880	70	572	746	455	93	141	245	87	46	0	1090	1353	809	73	136	367	87	71	0	0	0	0	0	0	0	0	0	0	0	0	0	0	0	0	0	0	0	0.471	0.510	0.451	0.506	2.102	0.434	0.513	0.000	0.000	0.000	0.000	0.000	0.000	0.000	0.000	0.000	0.000	0.000	0.000	0.000	0.000	32	236	1496	1933	-1.086	Error	Error	479	1017	0	0	653	1280	0	0	0	0
1	15	7	""	"YMR071C"	4580	25870	80	5336	4907	2279	95	101	44	100	100	0	4515	4339	2401	77	85	32	98	96	0	0	0	0	0	0	0	0	0	0	0	0	0	0	0	0	0	0	0	1.181	1.129	1.114	1.412	2.369	1.086	0.885	0.000	0.000	0.000	0.000	0.000	0.000	0.000	0.000	0.000	0.000	0.000	0.000	0.000	0.000	52	340	9679	9074	0.240	Error	Error	5241	4438	0	0	4812	4262	0	0	0	0
1	16	7	"HXT2"	"YMR011W"	4770	25870	80	27024	24259	7986	104	109	48	100	100	0	17084	15941	4533	85	95	45	100	100	0	0	0	0	0	0	0	0	0	0	0	0	0	0	0	0	0	0	0	1.584	1.523	1.498	1.476	1.282	1.527	0.928	0.000	0.000	0.000	0.000	0.000	0.000	0.000	0.000	0.000	0.000	0.000	0.000	0.000	0.000	52	340	43919	40011	0.663	Error	Error	26920	16999	0	0	24155	15856	0	0	0	0
1	17	7	"ARG80"	"YMR042W"	4980	25870	90	4353	3677	1537	99	118	178	96	96	0	7820	6774	2455	83	95	86	100	100	0	0	0	0	0	0	0	0	0	0	0	0	0	0	0	0	0	0	0	0.550	0.535	0.536	0.485	1.478	0.533	0.938	0.000	0.000	0.000	0.000	0.000	0.000	0.000	0.000	0.000	0.000	0.000	0.000	0.000	0.000	52	420	11991	10269	-0.863	Error	Error	4254	7737	0	0	3578	6691	0	0	0	0
1	18	7	""	"YMR073C"	5190	25870	90	7359	6656	2473	109	171	271	98	98	0	6646	6032	2109	83	259	867	96	94	0	0	0	0	0	0	0	0	0	0	0	0	0	0	0	0	0	0	0	1.105	1.101	1.079	1.088	1.456	1.079	0.878	0.000	0.000	0.000	0.000	0.000	0.000	0.000	0.000	0.000	0.000	0.000	0.000	0.000	0.000	52	420	13813	12496	0.144	Error	Error	7250	6563	0	0	6547	5949	0	0	0	0
1	19	7	""	"YNL047C"	5380	25860	80	16434	15628	6919	99	106	45	100	100	0	15924	13992	5600	78	86	36	100	100	0	0	0	0	0	0	0	0	0	0	0	0	0	0	0	0	0	0	0	1.031	1.116	1.131	1.103	1.460	1.142	0.945	0.000	0.000	0.000	0.000	0.000	0.000	0.000	0.000	0.000	0.000	0.000	0.000	0.000	0.000	52	340	32181	29443	0.044	Error	Error	16335	15846	0	0	15529	13914	0	0	0	0
1	20	7	""	"YNL080C"	5590	25880	150	8351	6428	4025	97	225	947	79	73	0	6326	4765	2907	71	192	814	78	75	0	0	0	0	0	0	0	0	0	0	0	0	0	0	0	0	0	0	0	1.320	1.349	1.379	1.443	1.895	1.357	0.952	0.000	0.000	0.000	0.000	0.000	0.000	0.000	0.000	0.000	0.000	0.000	0.000	0.000	0.000	156	1015	14509	11025	0.400	Error	Error	8254	6255	0	0	6331	4694	0	0	0	0
1	21	7	"DBP2"	"YNL112W"	5780	25860	70	15350	13974	5808	92	122	221	100	100	0	14167	12197	4629	65	78	96	100	100	0	0	0	0	0	0	0	0	0	0	0	0	0	0	0	0	0	0	0	1.082	1.144	1.152	1.103	1.346	1.172	0.938	0.000	0.000	0.000	0.000	0.000	0.000	0.000	0.000	0.000	0.000	0.000	0.000	0.000	0.000	32	236	29360	26014	0.114	Error	Error	15258	14102	0	0	13882	12132	0	0	0	0
1	1	8	"SFB2"	"YNL049C"	1770	26080	70	378	503	365	87	98	46	100	96	0	607	829	549	73	92	69	100	100	0	0	0	0	0	0	0	0	0	0	0	0	0	0	0	0	0	0	0	0.545	0.550	0.482	0.523	1.476	0.582	0.836	0.000	0.000	0.000	0.000	0.000	0.000	0.000	0.000	0.000	0.000	0.000	0.000	0.000	0.000	32	230	825	1172	-0.876	Error	Error	291	534	0	0	416	756	0	0	0	0
1	2	8	"PMS1"	"YNL082W"	1970	26080	70	11057	11605	7791	104	116	93	100	100	0	7714	7920	5255	77	107	180	100	100	0	0	0	0	0	0	0	0	0	0	0	0	0	0	0	0	0	0	0	1.434	1.466	1.417	1.396	1.504	1.444	0.936	0.000	0.000	0.000	0.000	0.000	0.000	0.000	0.000	0.000	0.000	0.000	0.000	0.000	0.000	32	236	18590	19344	0.520	Error	Error	10953	7637	0	0	11501	7843	0	0	0	0
1	3	8	""	"YNL114C"	2160	26070	70	3677	3743	1445	104	292	922	93	90	0	6366	6408	2357	87	499	1805	93	87	0	0	0	0	0	0	0	0	0	0	0	0	0	0	0	0	0	0	0	0.569	0.576	0.563	0.565	1.338	0.552	0.909	0.000	0.000	0.000	0.000	0.000	0.000	0.000	0.000	0.000	0.000	0.000	0.000	0.000	0.000	32	236	9852	9960	-0.813	Error	Error	3573	6279	0	0	3639	6321	0	0	0	0
1	4	8	""	"YNL051W"	2380	26080	80	16617	15189	7728	105	110	52	100	100	0	8273	7295	3305	81	94	54	100	100	0	0	0	0	0	0	0	0	0	0	0	0	0	0	0	0	0	0	0	2.016	2.091	2.145	2.064	1.416	2.209	0.948	0.000	0.000	0.000	0.000	0.000	0.000	0.000	0.000	0.000	0.000	0.000	0.000	0.000	0.000	52	340	24704	22298	1.011	Error	Error	16512	8192	0	0	15084	7214	0	0	0	0
1	5	8	"END3"	"YNL084C"	2570	26080	70	18620	15325	7351	107	259	948	96	93	0	10814	8878	3858	80	258	1023	100	81	0	0	0	0	0	0	0	0	0	0	0	0	0	0	0	0	0	0	0	1.725	1.730	1.743	1.589	1.377	1.747	0.947	0.000	0.000	0.000	0.000	0.000	0.000	0.000	0.000	0.000	0.000	0.000	0.000	0.000	0.000	32	236	29247	24016	0.786	Error	Error	18513	10734	0	0	15218	8798	0	0	0	0
1	6	8	""	"YNL116W"	2770	26080	80	26044	22855	8887	99	102	42	100	100	0	17253	15512	4926	72	77	28	100	100	0	0	0	0	0	0	0	0	0	0	0	0	0	0	0	0	0	0	0	1.510	1.474	1.520	1.420	1.281	1.531	0.948	0.000	0.000	0.000	0.000	0.000	0.000	0.000	0.000	0.000	0.000	0.000	0.000	0.000	0.000	52	340	43126	38196	0.595	Error	Error	25945	17181	0	0	22756	15440	0	0	0	0
1	7	8	"MSG5"	"YNL053W"	2980	26090	80	15369	13446	6279	95	102	41	100	100	0	17245	14712	5846	74	78	30	100	100	0	0	0	0	0	0	0	0	0	0	0	0	0	0	0	0	0	0	0	0.890	0.912	0.930	0.846	1.424	0.930	0.943	0.000	0.000	0.000	0.000	0.000	0.000	0.000	0.000	0.000	0.000	0.000	0.000	0.000	0.000	52	340	32445	27989	-0.169	Error	Error	15274	17171	0	0	13351	14638	0	0	0	0
1	8	8	""	"YNL086W"	3180	26080	80	2691	2920	1634	95	102	44	98	98	0	4318	4991	2725	69	81	57	100	98	0	0	0	0	0	0	0	0	0	0	0	0	0	0	0	0	0	0	0	0.611	0.574	0.565	0.550	1.489	0.575	0.902	0.000	0.000	0.000	0.000	0.000	0.000	0.000	0.000	0.000	0.000	0.000	0.000	0.000	0.000	52	340	6845	7747	-0.711	Error	Error	2596	4249	0	0	2825	4922	0	0	0	0
1	9	8	"DCP2"	"YNL118C"	3360	26080	60	9013	8780	4410	95	113	132	100	100	0	10862	10778	5156	69	158	547	100	100	0	0	0	0	0	0	0	0	0	0	0	0	0	0	0	0	0	0	0	0.826	0.811	0.794	0.792	1.316	0.774	0.921	0.000	0.000	0.000	0.000	0.000	0.000	0.000	0.000	0.000	0.000	0.000	0.000	0.000	0.000	32	176	19711	19394	-0.275	Error	Error	8918	10793	0	0	8685	10709	0	0	0	0
1	10	8	"CMK2"	"YOL016C"	3570	26070	60	164	283	328	91	95	41	68	43	0	185	363	528	74	81	31	84	75	0	0	0	0	0	0	0	0	0	0	0	0	0	0	0	0	0	0	0	0.658	0.664	0.709	0.805	3.060	0.610	0.844	0.000	0.000	0.000	0.000	0.000	0.000	0.000	0.000	0.000	0.000	0.000	0.000	0.000	0.000	32	176	184	481	-0.605	Error	Error	73	111	0	0	192	289	0	0	0	0
1	11	8	""	"YOL048C"	3760	26080	80	1042	1427	1251	90	95	43	100	96	0	1080	1343	1100	73	82	44	98	96	0	0	0	0	0	0	0	0	0	0	0	0	0	0	0	0	0	0	0	0.945	1.053	0.936	1.018	2.133	1.099	0.825	0.000	0.000	0.000	0.000	0.000	0.000	0.000	0.000	0.000	0.000	0.000	0.000	0.000	0.000	52	340	1959	2607	-0.081	Error	Error	952	1007	0	0	1337	1270	0	0	0	0
1	12	8	""	"YOL080C"	3970	26070	70	6277	6041	2397	85	95	47	100	100	0	7072	6835	2750	75	98	138	100	100	0	0	0	0	0	0	0	0	0	0	0	0	0	0	0	0	0	0	0	0.885	0.881	0.864	0.899	1.412	0.831	0.920	0.000	0.000	0.000	0.000	0.000	0.000	0.000	0.000	0.000	0.000	0.000	0.000	0.000	0.000	32	236	13189	12716	-0.176	Error	Error	6192	6997	0	0	5956	6760	0	0	0	0
1	13	8	"TLG2"	"YOL018C"	4180	26070	70	8225	8284	4966	99	116	116	100	100	0	6334	6746	3640	69	81	82	100	100	0	0	0	0	0	0	0	0	0	0	0	0	0	0	0	0	0	0	0	1.297	1.226	1.141	1.160	1.321	1.277	0.930	0.000	0.000	0.000	0.000	0.000	0.000	0.000	0.000	0.000	0.000	0.000	0.000	0.000	0.000	32	236	14391	14862	0.375	Error	Error	8126	6265	0	0	8185	6677	0	0	0	0
1	14	8	""	"YOL050C"	4370	26080	80	2747	2447	1208	86	106	207	100	94	0	3838	3185	1405	67	86	167	100	98	0	0	0	0	0	0	0	0	0	0	0	0	0	0	0	0	0	0	0	0.706	0.757	0.732	0.736	1.483	0.784	0.900	0.000	0.000	0.000	0.000	0.000	0.000	0.000	0.000	0.000	0.000	0.000	0.000	0.000	0.000	52	340	6432	5479	-0.503	Error	Error	2661	3771	0	0	2361	3118	0	0	0	0
1	15	8	""	"YOL082W"	4570	26070	70	3909	3384	1464	99	126	165	100	100	0	10043	8921	3717	77	217	759	100	100	0	0	0	0	0	0	0	0	0	0	0	0	0	0	0	0	0	0	0	0.382	0.371	0.361	0.359	1.250	0.352	0.936	0.000	0.000	0.000	0.000	0.000	0.000	0.000	0.000	0.000	0.000	0.000	0.000	0.000	0.000	32	236	13776	12129	-1.387	Error	Error	3810	9966	0	0	3285	8844	0	0	0	0
1	16	8	"TAT2"	"YOL020W"	4770	26070	70	14247	12960	4255	100	128	265	100	100	0	22313	19936	5685	81	142	421	100	100	0	0	0	0	0	0	0	0	0	0	0	0	0	0	0	0	0	0	0	0.636	0.648	0.629	0.622	1.228	0.651	0.921	0.000	0.000	0.000	0.000	0.000	0.000	0.000	0.000	0.000	0.000	0.000	0.000	0.000	0.000	32	236	36379	32715	-0.652	Error	Error	14147	22232	0	0	12860	19855	0	0	0	0
1	17	8	"SPE2"	"YOL052C"	4960	26070	70	7137	6234	2249	99	132	216	100	100	0	14361	12764	3931	82	270	1080	100	100	0	0	0	0	0	0	0	0	0	0	0	0	0	0	0	0	0	0	0	0.493	0.484	0.501	0.453	1.330	0.474	0.939	0.000	0.000	0.000	0.000	0.000	0.000	0.000	0.000	0.000	0.000	0.000	0.000	0.000	0.000	32	236	21317	18817	-1.021	Error	Error	7038	14279	0	0	6135	12682	0	0	0	0
1	18	8	""	"YOL084W"	5180	26070	80	7480	6918	3055	94	100	43	100	100	0	14830	13845	5106	78	87	39	100	100	0	0	0	0	0	0	0	0	0	0	0	0	0	0	0	0	0	0	0	0.501	0.496	0.499	0.482	1.644	0.505	0.950	0.000	0.000	0.000	0.000	0.000	0.000	0.000	0.000	0.000	0.000	0.000	0.000	0.000	0.000	52	340	22138	20591	-0.998	Error	Error	7386	14752	0	0	6824	13767	0	0	0	0
1	19	8	""	"YOL022C"	5370	26080	90	16580	14325	6124	97	131	277	100	96	0	10184	8867	3071	81	126	358	100	100	0	0	0	0	0	0	0	0	0	0	0	0	0	0	0	0	0	0	0	1.631	1.619	1.636	1.448	1.492	1.691	0.956	0.000	0.000	0.000	0.000	0.000	0.000	0.000	0.000	0.000	0.000	0.000	0.000	0.000	0.000	52	420	26586	23014	0.706	Error	Error	16483	10103	0	0	14228	8786	0	0	0	0
1	20	8	""	"YOL053W"	5560	26080	80	16359	13779	5482	95	120	224	100	98	0	13174	11474	4158	73	130	452	100	100	0	0	0	0	0	0	0	0	0	0	0	0	0	0	0	0	0	0	0	1.241	1.200	1.185	1.129	1.410	1.185	0.943	0.000	0.000	0.000	0.000	0.000	0.000	0.000	0.000	0.000	0.000	0.000	0.000	0.000	0.000	52	336	29365	25085	0.312	Error	Error	16264	13101	0	0	13684	11401	0	0	0	0
1	21	8	"ADH1"	"YOL086C"	5770	26070	80	6639	5732	2589	90	96	44	100	100	0	13658	11213	4792	67	74	50	98	98	0	0	0	0	0	0	0	0	0	0	0	0	0	0	0	0	0	0	0	0.482	0.506	0.497	0.525	1.677	0.494	0.932	0.000	0.000	0.000	0.000	0.000	0.000	0.000	0.000	0.000	0.000	0.000	0.000	0.000	0.000	52	340	20140	16788	-1.053	Error	Error	6549	13591	0	0	5642	11146	0	0	0	0
1	1	9	"RPL33B"	"YOR234C"	1750	26290	70	9216	10504	6857	102	659	2289	96	84	0	5290	5460	3181	79	421	1468	87	68	0	0	0	0	0	0	0	0	0	0	0	0	0	0	0	0	0	0	0	1.749	1.933	1.872	1.997	1.521	1.871	0.850	0.000	0.000	0.000	0.000	0.000	0.000	0.000	0.000	0.000	0.000	0.000	0.000	0.000	0.000	32	206	14325	15783	0.807	Error	Error	9114	5211	0	0	10402	5381	0	0	0	0
1	2	9	"PNT1"	"YOR266W"	1980	26270	150	94	102	43	95	209	1024	0	0	0	85	106	66	79	159	662	0	0	0	0	0	0	0	0	0	0	0	0	0	0	0	0	0	0	0	0	0	-0.167	0.259	0.842	1.023	5.118	0.248	0.051	0.000	0.000	0.000	0.000	0.000	0.000	0.000	0.000	0.000	0.000	0.000	0.000	0.000	0.000	156	1078	5	34	Error	Error	Error	-1	6	0	0	7	27	0	0	-50	0
1	3	9	""	"YOR298W"	2170	26290	70	4655	4556	2364	91	443	2013	84	59	0	3888	4331	2074	82	387	1511	93	65	0	0	0	0	0	0	0	0	0	0	0	0	0	0	0	0	0	0	0	1.199	1.051	1.021	0.987	1.488	1.280	0.824	0.000	0.000	0.000	0.000	0.000	0.000	0.000	0.000	0.000	0.000	0.000	0.000	0.000	0.000	32	236	8370	8714	0.262	Error	Error	4564	3806	0	0	4465	4249	0	0	0	0
1	4	9	"DFR1"	"YOR236W"	2380	26290	70	9098	9093	4320	99	148	385	100	100	0	12133	10940	4201	77	206	866	100	100	0	0	0	0	0	0	0	0	0	0	0	0	0	0	0	0	0	0	0	0.746	0.828	0.782	0.782	1.238	0.856	0.928	0.000	0.000	0.000	0.000	0.000	0.000	0.000	0.000	0.000	0.000	0.000	0.000	0.000	0.000	32	236	21055	19857	-0.422	Error	Error	8999	12056	0	0	8994	10863	0	0	0	0
1	5	9	""	"YOR268C"	2570	26280	70	4102	3707	1597	102	164	419	96	90	0	5623	4965	2085	74	229	875	90	87	0	0	0	0	0	0	0	0	0	0	0	0	0	0	0	0	0	0	0	0.721	0.737	0.716	0.706	1.428	0.733	0.920	0.000	0.000	0.000	0.000	0.000	0.000	0.000	0.000	0.000	0.000	0.000	0.000	0.000	0.000	32	236	9549	8496	-0.472	Error	Error	4000	5549	0	0	3605	4891	0	0	0	0
1	6	9	""	"YOR300W"	2780	26290	70	1365	1292	604	92	103	54	100	100	0	2701	2716	1301	76	91	127	100	100	0	0	0	0	0	0	0	0	0	0	0	0	0	0	0	0	0	0	0	0.485	0.455	0.485	0.464	1.388	0.430	0.859	0.000	0.000	0.000	0.000	0.000	0.000	0.000	0.000	0.000	0.000	0.000	0.000	0.000	0.000	32	236	3898	3840	-1.044	Error	Error	1273	2625	0	0	1200	2640	0	0	0	0
1	7	9	""	"YOR238W"	2970	26290	80	6417	6273	3017	90	96	40	100	100	0	8005	8447	3964	70	75	27	100	100	0	0	0	0	0	0	0	0	0	0	0	0	0	0	0	0	0	0	0	0.797	0.738	0.773	0.765	1.551	0.713	0.871	0.000	0.000	0.000	0.000	0.000	0.000	0.000	0.000	0.000	0.000	0.000	0.000	0.000	0.000	52	340	14262	14560	-0.327	Error	Error	6327	7935	0	0	6183	8377	0	0	0	0
1	8	9	"VPH1"	"YOR270C"	3160	26280	70	4896	5429	3449	93	318	1362	90	75	0	5124	6714	4012	74	442	2021	96	68	0	0	0	0	0	0	0	0	0	0	0	0	0	0	0	0	0	0	0	0.951	0.804	0.756	0.747	1.525	0.835	0.841	0.000	0.000	0.000	0.000	0.000	0.000	0.000	0.000	0.000	0.000	0.000	0.000	0.000	0.000	32	236	9853	11976	-0.072	Error	Error	4803	5050	0	0	5336	6640	0	0	0	0
1	9	9	""	"YOR302W"	3380	26280	70	140	144	76	89	93	40	56	21	0	175	199	93	72	79	32	93	68	0	0	0	0	0	0	0	0	0	0	0	0	0	0	0	0	0	0	0	0.495	0.433	0.583	0.553	3.410	0.501	0.342	0.000	0.000	0.000	0.000	0.000	0.000	0.000	0.000	0.000	0.000	0.000	0.000	0.000	0.000	32	236	154	182	-1.014	Error	Error	51	103	0	0	55	127	0	0	0	0
1	10	9	""	"YOR240W"	3570	26290	80	10183	8848	4158	92	97	41	100	100	0	11732	10677	4566	72	77	29	100	100	0	0	0	0	0	0	0	0	0	0	0	0	0	0	0	0	0	0	0	0.865	0.826	0.863	0.796	1.391	0.839	0.931	0.000	0.000	0.000	0.000	0.000	0.000	0.000	0.000	0.000	0.000	0.000	0.000	0.000	0.000	52	316	21751	19361	-0.208	Error	Error	10091	11660	0	0	8756	10605	0	0	0	0
1	11	9	"YTM1"	"YOR272W"	3760	26280	70	21112	18683	8587	104	728	3181	96	81	0	14669	13643	4871	74	692	2829	100	84	0	0	0	0	0	0	0	0	0	0	0	0	0	0	0	0	0	0	0	1.439	1.369	1.339	1.246	1.460	1.386	0.916	0.000	0.000	0.000	0.000	0.000	0.000	0.000	0.000	0.000	0.000	0.000	0.000	0.000	0.000	32	236	35603	32148	0.525	Error	Error	21008	14595	0	0	18579	13569	0	0	0	0
1	12	9	""	"YOR304C-A"	3960	26280	70	5185	5262	2907	93	156	385	96	90	0	2762	3100	1527	72	147	444	100	93	0	0	0	0	0	0	0	0	0	0	0	0	0	0	0	0	0	0	0	1.893	1.707	1.752	1.543	1.531	1.781	0.890	0.000	0.000	0.000	0.000	0.000	0.000	0.000	0.000	0.000	0.000	0.000	0.000	0.000	0.000	32	236	7782	8197	0.921	Error	Error	5092	2690	0	0	5169	3028	0	0	0	0
1	13	9	"GRE1"	"YPL223C"	4160	26280	70	9186	7742	3704	90	241	927	93	87	0	11473	9863	3755	70	369	1668	96	90	0	0	0	0	0	0	0	0	0	0	0	0	0	0	0	0	0	0	0	0.798	0.781	0.795	0.679	1.552	0.777	0.939	0.000	0.000	0.000	0.000	0.000	0.000	0.000	0.000	0.000	0.000	0.000	0.000	0.000	0.000	32	236	20499	17445	-0.326	Error	Error	9096	11403	0	0	7652	9793	0	0	0	0
1	14	9	"BBP1"	"YPL255W"	4370	26280	70	6832	6819	3725	88	97	56	100	100	0	7311	7431	4047	68	94	193	100	100	0	0	0	0	0	0	0	0	0	0	0	0	0	0	0	0	0	0	0	0.931	0.914	0.885	0.895	1.370	0.856	0.893	0.000	0.000	0.000	0.000	0.000	0.000	0.000	0.000	0.000	0.000	0.000	0.000	0.000	0.000	32	236	13987	14094	-0.103	Error	Error	6744	7243	0	0	6731	7363	0	0	0	0
1	15	9	""	"YPR004C"	4570	26280	70	18740	16948	6128	100	185	762	100	100	0	11028	9775	3202	75	107	367	100	100	0	0	0	0	0	0	0	0	0	0	0	0	0	0	0	0	0	0	0	1.702	1.737	1.762	1.685	1.202	1.724	0.950	0.000	0.000	0.000	0.000	0.000	0.000	0.000	0.000	0.000	0.000	0.000	0.000	0.000	0.000	32	236	29593	26548	0.767	Error	Error	18640	10953	0	0	16848	9700	0	0	0	0
1	16	9	""	"YPL225W"	4780	26290	70	8361	7295	3493	98	142	412	93	93	0	5599	5248	2204	75	88	69	100	100	0	0	0	0	0	0	0	0	0	0	0	0	0	0	0	0	0	0	0	1.496	1.391	1.386	1.248	1.491	1.530	0.913	0.000	0.000	0.000	0.000	0.000	0.000	0.000	0.000	0.000	0.000	0.000	0.000	0.000	0.000	32	236	13787	12370	0.581	Error	Error	8263	5524	0	0	7197	5173	0	0	0	0
1	17	9	""	"YPL257W"	4960	26280	70	6648	5972	3244	100	222	733	93	84	0	5374	5116	2745	80	228	784	90	84	0	0	0	0	0	0	0	0	0	0	0	0	0	0	0	0	0	0	0	1.237	1.166	1.172	1.105	1.371	1.162	0.917	0.000	0.000	0.000	0.000	0.000	0.000	0.000	0.000	0.000	0.000	0.000	0.000	0.000	0.000	32	236	11842	10908	0.307	Error	Error	6548	5294	0	0	5872	5036	0	0	0	0
1	18	9	"ICL2"	"YPR006C"	5150	26280	70	13355	12818	6864	100	584	2398	93	84	0	8572	8947	4681	82	496	1979	93	78	0	0	0	0	0	0	0	0	0	0	0	0	0	0	0	0	0	0	0	1.561	1.435	1.451	1.423	1.614	1.405	0.928	0.000	0.000	0.000	0.000	0.000	0.000	0.000	0.000	0.000	0.000	0.000	0.000	0.000	0.000	32	236	21745	21583	0.643	Error	Error	13255	8490	0	0	12718	8865	0	0	0	0
1	19	9	"ALG5"	"YPL227C"	5380	26280	70	13023	13537	6989	103	114	85	100	100	0	7146	6974	3117	78	99	156	100	100	0	0	0	0	0	0	0	0	0	0	0	0	0	0	0	0	0	0	0	1.828	1.948	1.876	1.841	1.288	2.003	0.939	0.000	0.000	0.000	0.000	0.000	0.000	0.000	0.000	0.000	0.000	0.000	0.000	0.000	0.000	32	236	19988	20330	0.870	Error	Error	12920	7068	0	0	13434	6896	0	0	0	0
1	20	9	"APM1"	"YPL259C"	5590	26280	70	19619	19994	7300	93	523	2257	100	100	0	10830	10023	3015	71	248	972	100	96	0	0	0	0	0	0	0	0	0	0	0	0	0	0	0	0	0	0	0	1.815	2.000	2.054	1.962	1.314	2.116	0.936	0.000	0.000	0.000	0.000	0.000	0.000	0.000	0.000	0.000	0.000	0.000	0.000	0.000	0.000	32	236	30285	29853	0.860	Error	Error	19526	10759	0	0	19901	9952	0	0	0	0
1	21	9	""	"YPR008W"	5780	26280	70	5991	6393	3592	93	201	755	100	96	0	3642	4318	2987	69	101	342	100	100	0	0	0	0	0	0	0	0	0	0	0	0	0	0	0	0	0	0	0	1.651	1.483	1.449	1.571	1.623	1.411	0.815	0.000	0.000	0.000	0.000	0.000	0.000	0.000	0.000	0.000	0.000	0.000	0.000	0.000	0.000	32	236	9471	10549	0.723	Error	Error	5898	3573	0	0	6300	4249	0	0	0	0
1	1	10	""	"YPL229W"	1780	26510	90	5351	6391	5111	91	118	349	96	92	0	6388	6297	4576	82	104	125	94	94	0	0	0	0	0	0	0	0	0	0	0	0	0	0	0	0	0	0	0	0.834	1.014	0.908	1.201	2.650	1.086	0.734	0.000	0.000	0.000	0.000	0.000	0.000	0.000	0.000	0.000	0.000	0.000	0.000	0.000	0.000	52	420	11566	12515	-0.262	Error	Error	5260	6306	0	0	6300	6215	0	0	0	0
1	2	10	""	"YPL261C"	1970	26500	70	537	614	314	90	100	75	100	100	0	1012	1148	657	80	112	195	100	93	0	0	0	0	0	0	0	0	0	0	0	0	0	0	0	0	0	0	0	0.480	0.491	0.494	0.496	1.488	0.477	0.845	0.000	0.000	0.000	0.000	0.000	0.000	0.000	0.000	0.000	0.000	0.000	0.000	0.000	0.000	32	236	1379	1592	-1.060	Error	Error	447	932	0	0	524	1068	0	0	0	0
1	3	10	"RPA135"	"YPR010C"	2150	26490	90	1732	1961	1255	87	106	98	96	94	0	1617	1815	1134	80	109	138	94	90	0	0	0	0	0	0	0	0	0	0	0	0	0	0	0	0	0	0	0	1.070	1.080	1.097	1.077	2.539	1.091	0.861	0.000	0.000	0.000	0.000	0.000	0.000	0.000	0.000	0.000	0.000	0.000	0.000	0.000	0.000	52	420	3182	3609	0.098	Error	Error	1645	1537	0	0	1874	1735	0	0	0	0
1	4	10	"SEC7"	"YDR170C"	2370	26470	50	120	131	63	97	106	56	33	16	0	167	186	131	76	115	106	33	16	0	0	0	0	0	0	0	0	0	0	0	0	0	0	0	0	0	0	0	0.253	0.309	0.605	0.591	3.454	0.324	0.174	0.000	0.000	0.000	0.000	0.000	0.000	0.000	0.000	0.000	0.000	0.000	0.000	0.000	0.000	12	104	114	144	-1.984	Error	Error	23	91	0	0	34	110	0	0	0	0
1	5	10	"YRF1-1"	"YDR545W"	2550	26510	50	193	174	69	90	104	65	58	16	0	220	241	101	79	107	106	66	33	0	0	0	0	0	0	0	0	0	0	0	0	0	0	0	0	0	0	0	0.730	0.519	0.597	0.599	2.482	0.445	0.336	0.000	0.000	0.000	0.000	0.000	0.000	0.000	0.000	0.000	0.000	0.000	0.000	0.000	0.000	12	104	244	246	-0.453	Error	Error	103	141	0	0	84	162	0	0	0	0
1	6	10	"SWI4"	"YER111C"	2750	26490	60	112	132	74	88	93	53	34	12	0	103	152	118	72	87	85	31	21	0	0	0	0	0	0	0	0	0	0	0	0	0	0	0	0	0	0	0	0.774	0.550	0.662	0.701	4.610	0.244	0.247	0.000	0.000	0.000	0.000	0.000	0.000	0.000	0.000	0.000	0.000	0.000	0.000	0.000	0.000	32	176	55	124	-0.369	Error	Error	24	31	0	0	44	80	0	0	0	0
1	7	10	"ESP1"	"YGR098C"	2950	26510	50	143	178	113	98	102	52	50	33	0	193	194	102	75	104	107	50	16	0	0	0	0	0	0	0	0	0	0	0	0	0	0	0	0	0	0	0	0.381	0.672	0.868	0.605	1.826	0.546	0.394	0.000	0.000	0.000	0.000	0.000	0.000	0.000	0.000	0.000	0.000	0.000	0.000	0.000	0.000	12	104	163	199	-1.391	Error	Error	45	118	0	0	80	119	0	0	0	0
1	8	10	"RIM101"	"YHL027W"	3180	26470	150	95	109	56	89	144	648	0	0	0	71	101	87	71	160	963	0	0	0	0	0	0	0	0	0	0	0	0	0	0	0	0	0	0	0	0	0	100000.000	0.667	1.042	1.164	4.292	0.631	0.122	0.000	0.000	0.000	0.000	0.000	0.000	0.000	0.000	0.000	0.000	0.000	0.000	0.000	0.000	156	1064	6	50	16.610	Error	Error	6	0	0	0	20	30	0	0	-50	0
1	9	10	"MIP6"	"YHR015W"	3360	26490	60	121	138	70	83	86	37	53	34	0	87	185	166	70	73	24	43	40	0	0	0	0	0	0	0	0	0	0	0	0	0	0	0	0	0	0	0	2.235	0.478	0.319	0.464	2.914	0.338	0.281	0.000	0.000	0.000	0.000	0.000	0.000	0.000	0.000	0.000	0.000	0.000	0.000	0.000	0.000	32	176	55	170	1.160	Error	Error	38	17	0	0	55	115	0	0	0	0
1	10	10	"VTH1"	"YIL173W"	3580	26470	150	92	104	61	94	96	45	18	10	0	70	96	79	68	77	44	14	11	0	0	0	0	0	0	0	0	0	0	0	0	0	0	0	0	0	0	0	-1.000	0.357	1.071	1.266	3.945	0.846	0.165	0.000	0.000	0.000	0.000	0.000	0.000	0.000	0.000	0.000	0.000	0.000	0.000	0.000	0.000	156	1010	0	38	Error	Error	Error	-2	2	0	0	10	28	0	0	-50	0
1	11	10	""	"YJR029W"	3760	26480	60	137	156	92	87	92	38	53	37	0	98	180	169	71	78	31	46	37	0	0	0	0	0	0	0	0	0	0	0	0	0	0	0	0	0	0	0	1.852	0.633	0.974	0.870	3.988	0.469	0.464	0.000	0.000	0.000	0.000	0.000	0.000	0.000	0.000	0.000	0.000	0.000	0.000	0.000	0.000	32	176	77	178	0.889	Error	Error	50	27	0	0	69	109	0	0	0	0
1	12	10	""	"YLL034C"	3970	26480	70	124	133	73	82	93	41	50	25	0	104	177	152	66	74	36	50	37	0	0	0	0	0	0	0	0	0	0	0	0	0	0	0	0	0	0	0	1.105	0.459	0.850	0.677	3.029	0.419	0.279	0.000	0.000	0.000	0.000	0.000	0.000	0.000	0.000	0.000	0.000	0.000	0.000	0.000	0.000	32	236	80	162	0.144	Error	Error	42	38	0	0	51	111	0	0	0	0
1	13	10	"ESC1"	"YMR219W"	4160	26460	50	167	170	79	95	115	72	50	25	0	205	200	120	69	111	194	33	0	0	0	0	0	0	0	0	0	0	0	0	0	0	0	0	0	0	0	0	0.529	0.573	0.556	0.546	1.694	0.430	0.257	0.000	0.000	0.000	0.000	0.000	0.000	0.000	0.000	0.000	0.000	0.000	0.000	0.000	0.000	12	104	208	206	-0.918	Error	Error	72	136	0	0	75	131	0	0	0	0
1	14	10	"YKU70"	"YMR284W"	4370	26470	150	91	103	55	90	98	73	10	3	0	70	96	78	66	79	103	10	6	0	0	0	0	0	0	0	0	0	0	0	0	0	0	0	0	0	0	0	0.250	0.433	1.289	1.255	4.130	1.017	0.086	0.000	0.000	0.000	0.000	0.000	0.000	0.000	0.000	0.000	0.000	0.000	0.000	0.000	0.000	156	958	5	43	-2.000	Error	Error	1	4	0	0	13	30	0	0	-50	0
1	15	10	"POL1"	"YNL102W"	4570	26470	150	100	111	56	95	120	389	0	0	0	71	98	74	68	80	187	5	0	0	0	0	0	0	0	0	0	0	0	0	0	0	0	0	0	0	0	0	1.667	0.533	1.333	1.445	4.034	1.220	0.148	0.000	0.000	0.000	0.000	0.000	0.000	0.000	0.000	0.000	0.000	0.000	0.000	0.000	0.000	156	921	8	46	0.737	Error	Error	5	3	0	0	16	30	0	0	-50	0
1	16	10	""	"YMRWdelta20"	4770	26480	70	3211	3015	1620	100	106	58	100	100	0	3589	3726	1814	68	75	35	100	100	0	0	0	0	0	0	0	0	0	0	0	0	0	0	0	0	0	0	0	0.884	0.797	0.824	0.675	1.682	0.833	0.939	0.000	0.000	0.000	0.000	0.000	0.000	0.000	0.000	0.000	0.000	0.000	0.000	0.000	0.000	32	236	6632	6573	-0.179	Error	Error	3111	3521	0	0	2915	3658	0	0	0	0
1	17	10	""	"IntYNL112W"	4970	26490	100	277	521	816	93	96	41	86	72	0	280	560	793	72	77	29	91	85	0	0	0	0	0	0	0	0	0	0	0	0	0	0	0	0	0	0	0	0.885	0.877	0.842	0.842	3.071	0.983	0.713	0.000	0.000	0.000	0.000	0.000	0.000	0.000	0.000	0.000	0.000	0.000	0.000	0.000	0.000	80	556	392	916	-0.177	Error	Error	184	208	0	0	428	488	0	0	0	0
1	18	10	""	"CEN14"	5180	26470	70	210	216	102	90	95	41	81	56	0	190	194	55	71	75	23	100	96	0	0	0	0	0	0	0	0	0	0	0	0	0	0	0	0	0	0	0	1.008	1.024	1.000	0.916	2.271	1.553	0.279	0.000	0.000	0.000	0.000	0.000	0.000	0.000	0.000	0.000	0.000	0.000	0.000	0.000	0.000	32	236	239	249	0.012	Error	Error	120	119	0	0	126	123	0	0	0	0
1	19	10	""	"YORCdelta11"	5370	26480	80	1141	1916	1902	92	96	39	100	96	0	1326	2611	2504	71	76	26	100	100	0	0	0	0	0	0	0	0	0	0	0	0	0	0	0	0	0	0	0	0.836	0.718	0.671	0.664	1.507	0.736	0.940	0.000	0.000	0.000	0.000	0.000	0.000	0.000	0.000	0.000	0.000	0.000	0.000	0.000	0.000	52	340	2304	4364	-0.259	Error	Error	1049	1255	0	0	1824	2540	0	0	0	0
1	20	10	""	"YORWdelta16"	5580	26480	60	412	744	714	89	92	42	81	78	0	370	697	664	73	76	25	100	100	0	0	0	0	0	0	0	0	0	0	0	0	0	0	0	0	0	0	0	1.088	1.050	0.976	0.824	2.501	1.076	0.824	0.000	0.000	0.000	0.000	0.000	0.000	0.000	0.000	0.000	0.000	0.000	0.000	0.000	0.000	32	176	620	1279	0.121	Error	Error	323	297	0	0	655	624	0	0	0	0
1	21	10	""	"YOR298C-A"	5780	26480	70	2231	1919	868	87	92	42	100	100	0	2332	1995	854	68	74	30	100	100	0	0	0	0	0	0	0	0	0	0	0	0	0	0	0	0	0	0	0	0.947	0.951	0.969	0.958	1.345	0.966	0.934	0.000	0.000	0.000	0.000	0.000	0.000	0.000	0.000	0.000	0.000	0.000	0.000	0.000	0.000	32	236	4408	3759	-0.079	Error	Error	2144	2264	0	0	1832	1927	0	0	0	0
1	1	11	""	"YPLCdelta10"	1770	26690	60	457	1055	1570	87	92	41	96	96	0	520	927	921	79	92	68	96	81	0	0	0	0	0	0	0	0	0	0	0	0	0	0	0	0	0	0	0	0.839	1.142	0.969	0.997	2.212	1.782	0.488	0.000	0.000	0.000	0.000	0.000	0.000	0.000	0.000	0.000	0.000	0.000	0.000	0.000	0.000	32	170	811	1816	-0.253	Error	Error	370	441	0	0	968	848	0	0	0	0
1	2	11	""	"YPRCdelta13"	1980	26690	90	1178	2984	3106	87	94	47	100	98	0	1013	2545	2662	74	79	29	98	98	0	0	0	0	0	0	0	0	0	0	0	0	0	0	0	0	0	0	0	1.162	1.172	1.150	1.167	1.981	1.173	0.942	0.000	0.000	0.000	0.000	0.000	0.000	0.000	0.000	0.000	0.000	0.000	0.000	0.000	0.000	52	420	2030	5368	0.216	Error	Error	1091	939	0	0	2897	2471	0	0	0	0
1	3	11	""	"SNR51"	2170	26690	70	236	287	156	92	97	43	90	81	0	373	440	230	72	82	36	100	100	0	0	0	0	0	0	0	0	0	0	0	0	0	0	0	0	0	0	0	0.478	0.530	0.546	0.478	1.897	0.543	0.661	0.000	0.000	0.000	0.000	0.000	0.000	0.000	0.000	0.000	0.000	0.000	0.000	0.000	0.000	32	236	445	563	-1.064	Error	Error	144	301	0	0	195	368	0	0	0	0
1	4	11	""	"iYAL068C-0"	2360	26690	70	172	205	121	88	94	41	75	53	0	271	314	159	75	83	39	93	87	0	0	0	0	0	0	0	0	0	0	0	0	0	0	0	0	0	0	0	0.429	0.490	0.466	0.404	2.956	0.481	0.409	0.000	0.000	0.000	0.000	0.000	0.000	0.000	0.000	0.000	0.000	0.000	0.000	0.000	0.000	32	236	280	356	-1.222	Error	Error	84	196	0	0	117	239	0	0	0	0
1	5	11	""	"iYAL067C"	2570	26690	80	1057	1711	1483	90	96	42	98	98	0	2374	3596	2983	74	82	40	100	100	0	0	0	0	0	0	0	0	0	0	0	0	0	0	0	0	0	0	0	0.420	0.460	0.465	0.410	1.543	0.467	0.928	0.000	0.000	0.000	0.000	0.000	0.000	0.000	0.000	0.000	0.000	0.000	0.000	0.000	0.000	52	340	3267	5143	-1.250	Error	Error	967	2300	0	0	1621	3522	0	0	0	0
1	6	11	""	"iYAL064C-A-0"	2770	26690	90	834	2077	2984	90	97	56	98	96	0	1147	2549	3271	75	84	37	100	98	0	0	0	0	0	0	0	0	0	0	0	0	0	0	0	0	0	0	0	0.694	0.803	0.695	0.667	1.950	0.871	0.848	0.000	0.000	0.000	0.000	0.000	0.000	0.000	0.000	0.000	0.000	0.000	0.000	0.000	0.000	52	420	1816	4461	-0.527	Error	Error	744	1072	0	0	1987	2474	0	0	0	0
1	7	11	""	"iYBR065C"	2970	26690	80	872	1774	1770	88	96	43	100	98	0	1256	2798	2792	71	80	33	100	100	0	0	0	0	0	0	0	0	0	0	0	0	0	0	0	0	0	0	0	0.662	0.618	0.597	0.591	1.598	0.619	0.938	0.000	0.000	0.000	0.000	0.000	0.000	0.000	0.000	0.000	0.000	0.000	0.000	0.000	0.000	52	340	1969	4413	-0.596	Error	Error	784	1185	0	0	1686	2727	0	0	0	0
1	8	11	""	"iYBR069C"	3170	26680	70	441	660	573	87	92	42	100	90	0	795	1302	1163	72	81	36	100	96	0	0	0	0	0	0	0	0	0	0	0	0	0	0	0	0	0	0	0	0.490	0.466	0.416	0.505	1.761	0.459	0.867	0.000	0.000	0.000	0.000	0.000	0.000	0.000	0.000	0.000	0.000	0.000	0.000	0.000	0.000	32	236	1077	1803	-1.030	Error	Error	354	723	0	0	573	1230	0	0	0	0
1	9	11	""	"iYBR073W"	3370	26690	60	277	311	177	94	99	44	84	78	0	444	507	253	74	82	35	100	100	0	0	0	0	0	0	0	0	0	0	0	0	0	0	0	0	0	0	0	0.495	0.501	0.420	0.409	2.081	0.528	0.662	0.000	0.000	0.000	0.000	0.000	0.000	0.000	0.000	0.000	0.000	0.000	0.000	0.000	0.000	32	176	553	650	-1.016	Error	Error	183	370	0	0	217	433	0	0	0	0
1	10	11	""	"iYBR085W-1"	3570	26690	70	588	1018	1059	83	90	39	100	96	0	1360	1833	1826	70	80	42	100	100	0	0	0	0	0	0	0	0	0	0	0	0	0	0	0	0	0	0	0	0.391	0.530	0.496	0.479	1.612	0.535	0.862	0.000	0.000	0.000	0.000	0.000	0.000	0.000	0.000	0.000	0.000	0.000	0.000	0.000	0.000	32	236	1795	2698	-1.353	Error	Error	505	1290	0	0	935	1763	0	0	0	0
1	11	11	""	"iYBR089W"	3770	26690	100	1030	2133	2538	87	91	46	97	92	0	1243	2539	2902	68	79	55	95	91	0	0	0	0	0	0	0	0	0	0	0	0	0	0	0	0	0	0	0	0.803	0.828	0.781	0.857	1.947	0.853	0.912	0.000	0.000	0.000	0.000	0.000	0.000	0.000	0.000	0.000	0.000	0.000	0.000	0.000	0.000	80	554	2118	4517	-0.317	Error	Error	943	1175	0	0	2046	2471	0	0	0	0
1	12	11	""	"iYBR093C"	3970	26690	80	381	725	733	87	94	40	96	88	0	691	1560	1629	68	77	35	100	100	0	0	0	0	0	0	0	0	0	0	0	0	0	0	0	0	0	0	0	0.472	0.428	0.416	0.396	1.744	0.421	0.875	0.000	0.000	0.000	0.000	0.000	0.000	0.000	0.000	0.000	0.000	0.000	0.000	0.000	0.000	52	340	917	2130	-1.083	Error	Error	294	623	0	0	638	1492	0	0	0	0
1	13	11	""	"iYBR111C"	4180	26680	90	1636	2840	2355	91	96	43	100	100	0	2233	2503	1894	67	74	30	100	100	0	0	0	0	0	0	0	0	0	0	0	0	0	0	0	0	0	0	0	0.713	1.128	1.042	1.013	1.627	1.187	0.931	0.000	0.000	0.000	0.000	0.000	0.000	0.000	0.000	0.000	0.000	0.000	0.000	0.000	0.000	52	414	3711	5185	-0.487	Error	Error	1545	2166	0	0	2749	2436	0	0	0	0
1	14	11	""	"iYBR117C"	4360	26690	90	1805	2153	1718	90	94	39	100	100	0	3322	3922	2906	69	76	32	100	100	0	0	0	0	0	0	0	0	0	0	0	0	0	0	0	0	0	0	0	0.527	0.535	0.506	0.488	1.693	0.547	0.925	0.000	0.000	0.000	0.000	0.000	0.000	0.000	0.000	0.000	0.000	0.000	0.000	0.000	0.000	52	414	4968	5916	-0.924	Error	Error	1715	3253	0	0	2063	3853	0	0	0	0
1	15	11	""	"iYBR121C"	4570	26680	80	1892	3022	2865	91	95	40	100	100	0	2727	3882	3474	66	70	22	100	100	0	0	0	0	0	0	0	0	0	0	0	0	0	0	0	0	0	0	0	0.677	0.768	0.712	0.716	1.704	0.794	0.942	0.000	0.000	0.000	0.000	0.000	0.000	0.000	0.000	0.000	0.000	0.000	0.000	0.000	0.000	52	340	4462	6747	-0.563	Error	Error	1801	2661	0	0	2931	3816	0	0	0	0
1	16	11	""	"iYBR139W"	4760	26690	70	359	407	242	89	93	38	96	84	0	287	363	213	69	71	20	100	100	0	0	0	0	0	0	0	0	0	0	0	0	0	0	0	0	0	0	0	1.239	1.082	0.988	1.006	1.931	1.090	0.581	0.000	0.000	0.000	0.000	0.000	0.000	0.000	0.000	0.000	0.000	0.000	0.000	0.000	0.000	32	236	488	612	0.309	Error	Error	270	218	0	0	318	294	0	0	0	0
1	17	11	""	"iYBR143C"	4960	26680	70	1419	1811	1603	90	99	51	96	84	0	2348	3330	3068	71	85	59	100	96	0	0	0	0	0	0	0	0	0	0	0	0	0	0	0	0	0	0	0	0.584	0.528	0.489	0.491	2.163	0.506	0.907	0.000	0.000	0.000	0.000	0.000	0.000	0.000	0.000	0.000	0.000	0.000	0.000	0.000	0.000	32	236	3606	4980	-0.777	Error	Error	1329	2277	0	0	1721	3259	0	0	0	0
1	18	11	""	"iYBR147W"	5180	26680	80	1110	2051	1874	88	92	41	98	98	0	1517	2787	2472	68	73	27	100	100	0	0	0	0	0	0	0	0	0	0	0	0	0	0	0	0	0	0	0	0.705	0.722	0.675	0.663	1.604	0.734	0.938	0.000	0.000	0.000	0.000	0.000	0.000	0.000	0.000	0.000	0.000	0.000	0.000	0.000	0.000	52	340	2471	4682	-0.504	Error	Error	1022	1449	0	0	1963	2719	0	0	0	0
1	19	11	""	"iYDL240W"	5370	26680	90	478	1285	1583	89	93	40	96	90	0	354	725	715	69	76	27	100	98	0	0	0	0	0	0	0	0	0	0	0	0	0	0	0	0	0	0	0	1.365	1.823	1.509	1.298	1.967	2.142	0.898	0.000	0.000	0.000	0.000	0.000	0.000	0.000	0.000	0.000	0.000	0.000	0.000	0.000	0.000	52	420	674	1852	0.449	Error	Error	389	285	0	0	1196	656	0	0	0	0
1	20	11	""	"iYDL236W"	5570	26680	80	173	222	152	92	96	42	71	50	0	193	239	145	66	72	27	92	82	0	0	0	0	0	0	0	0	0	0	0	0	0	0	0	0	0	0	0	0.638	0.751	0.835	0.826	2.302	0.938	0.589	0.000	0.000	0.000	0.000	0.000	0.000	0.000	0.000	0.000	0.000	0.000	0.000	0.000	0.000	52	340	208	303	-0.649	Error	Error	81	127	0	0	130	173	0	0	0	0
1	21	11	""	"iYDL232W"	5760	26670	70	581	991	892	89	94	39	100	90	0	441	921	938	67	71	24	90	90	0	0	0	0	0	0	0	0	0	0	0	0	0	0	0	0	0	0	0	1.316	1.056	1.143	1.263	1.997	0.984	0.939	0.000	0.000	0.000	0.000	0.000	0.000	0.000	0.000	0.000	0.000	0.000	0.000	0.000	0.000	32	236	866	1756	0.396	Error	Error	492	374	0	0	902	854	0	0	0	0
1	1	12	""	"iYDL216C"	1760	26900	70	1429	2026	1586	94	135	191	96	78	0	1753	2904	2210	78	138	226	100	96	0	0	0	0	0	0	0	0	0	0	0	0	0	0	0	0	0	0	0	0.797	0.684	0.659	0.631	1.460	0.684	0.925	0.000	0.000	0.000	0.000	0.000	0.000	0.000	0.000	0.000	0.000	0.000	0.000	0.000	0.000	32	220	3010	4758	-0.327	Error	Error	1335	1675	0	0	1932	2826	0	0	0	0
1	2	12	""	"iYDL212W"	1970	26900	80	370	786	721	91	91	36	96	88	0	822	1784	1698	76	88	51	100	100	0	0	0	0	0	0	0	0	0	0	0	0	0	0	0	0	0	0	0	0.374	0.407	0.371	0.351	1.801	0.406	0.905	0.000	0.000	0.000	0.000	0.000	0.000	0.000	0.000	0.000	0.000	0.000	0.000	0.000	0.000	52	340	1025	2403	-1.419	Error	Error	279	746	0	0	695	1708	0	0	0	0
1	3	12	""	"itG(GCC)D1"	2170	26900	90	1513	3414	3810	96	214	1646	48	36	0	2493	3609	3909	79	140	720	75	55	0	0	0	0	0	0	0	0	0	0	0	0	0	0	0	0	0	0	0	0.587	0.940	0.879	0.891	1.927	0.979	0.890	0.000	0.000	0.000	0.000	0.000	0.000	0.000	0.000	0.000	0.000	0.000	0.000	0.000	0.000	52	385	3831	6848	-0.769	Error	Error	1417	2414	0	0	3318	3530	0	0	0	0
1	4	12	""	"iYDL195W"	2370	26880	70	1573	2279	2179	93	112	211	84	65	0	1878	3381	3373	78	107	325	84	62	0	0	0	0	0	0	0	0	0	0	0	0	0	0	0	0	0	0	0	0.822	0.662	0.648	0.646	1.962	0.618	0.821	0.000	0.000	0.000	0.000	0.000	0.000	0.000	0.000	0.000	0.000	0.000	0.000	0.000	0.000	32	236	3280	5489	-0.282	Error	Error	1480	1800	0	0	2186	3303	0	0	0	0
1	5	12	""	"iYDL191W"	2580	26890	80	557	1934	2327	94	101	61	84	75	0	634	1279	1379	75	87	52	92	76	0	0	0	0	0	0	0	0	0	0	0	0	0	0	0	0	0	0	0	0.828	1.528	1.321	1.186	2.166	1.669	0.915	0.000	0.000	0.000	0.000	0.000	0.000	0.000	0.000	0.000	0.000	0.000	0.000	0.000	0.000	52	340	1022	3044	-0.272	Error	Error	463	559	0	0	1840	1204	0	0	0	0
1	6	12	""	"iYDL186W"	2770	26900	80	1326	1901	1576	83	90	44	100	100	0	2118	3335	2740	69	76	34	100	100	0	0	0	0	0	0	0	0	0	0	0	0	0	0	0	0	0	0	0	0.607	0.557	0.538	0.503	1.578	0.558	0.955	0.000	0.000	0.000	0.000	0.000	0.000	0.000	0.000	0.000	0.000	0.000	0.000	0.000	0.000	52	340	3292	5084	-0.721	Error	Error	1243	2049	0	0	1818	3266	0	0	0	0
1	7	12	""	"iYDL170W"	2990	26900	60	362	556	470	87	98	65	78	68	0	560	873	889	69	79	65	84	71	0	0	0	0	0	0	0	0	0	0	0	0	0	0	0	0	0	0	0	0.560	0.583	0.522	0.678	2.606	0.518	0.770	0.000	0.000	0.000	0.000	0.000	0.000	0.000	0.000	0.000	0.000	0.000	0.000	0.000	0.000	32	176	766	1273	-0.836	Error	Error	275	491	0	0	469	804	0	0	0	0
1	8	12	""	"iYDL166C"	3160	26890	70	395	428	198	92	96	41	100	93	0	639	751	417	75	79	30	100	100	0	0	0	0	0	0	0	0	0	0	0	0	0	0	0	0	0	0	0	0.537	0.497	0.501	0.501	2.054	0.440	0.705	0.000	0.000	0.000	0.000	0.000	0.000	0.000	0.000	0.000	0.000	0.000	0.000	0.000	0.000	32	236	867	1012	-0.896	Error	Error	303	564	0	0	336	676	0	0	0	0
1	9	12	""	"iYDL160C"	3360	26890	70	1379	1919	1754	98	104	58	100	93	0	2280	3624	3170	75	100	112	96	96	0	0	0	0	0	0	0	0	0	0	0	0	0	0	0	0	0	0	0	0.581	0.513	0.525	0.484	1.646	0.516	0.904	0.000	0.000	0.000	0.000	0.000	0.000	0.000	0.000	0.000	0.000	0.000	0.000	0.000	0.000	32	236	3486	5370	-0.784	Error	Error	1281	2205	0	0	1821	3549	0	0	0	0
1	10	12	""	"iYDR141C"	3570	26880	70	2401	2502	1531	88	92	42	100	100	0	5598	5811	3200	71	83	66	100	100	0	0	0	0	0	0	0	0	0	0	0	0	0	0	0	0	0	0	0	0.418	0.421	0.409	0.385	1.558	0.427	0.934	0.000	0.000	0.000	0.000	0.000	0.000	0.000	0.000	0.000	0.000	0.000	0.000	0.000	0.000	32	236	7840	8154	-1.257	Error	Error	2313	5527	0	0	2414	5740	0	0	0	0
1	11	12	""	"iYDR145W"	3760	26890	60	221	266	171	86	91	37	81	75	0	330	356	171	71	79	34	96	90	0	0	0	0	0	0	0	0	0	0	0	0	0	0	0	0	0	0	0	0.521	0.632	0.492	0.573	2.678	0.697	0.521	0.000	0.000	0.000	0.000	0.000	0.000	0.000	0.000	0.000	0.000	0.000	0.000	0.000	0.000	32	176	394	465	-0.940	Error	Error	135	259	0	0	180	285	0	0	0	0
1	12	12	""	"iYDR150W"	3970	26890	80	3922	4681	3683	91	95	40	100	100	0	2586	3343	2503	71	76	31	100	100	0	0	0	0	0	0	0	0	0	0	0	0	0	0	0	0	0	0	0	1.523	1.403	1.335	1.294	1.547	1.434	0.942	0.000	0.000	0.000	0.000	0.000	0.000	0.000	0.000	0.000	0.000	0.000	0.000	0.000	0.000	52	340	6346	7862	0.607	Error	Error	3831	2515	0	0	4590	3272	0	0	0	0
1	13	12	""	"iYDR169C-0"	4180	26890	90	1282	2404	2460	89	95	42	100	100	0	2043	3219	3003	72	80	33	100	100	0	0	0	0	0	0	0	0	0	0	0	0	0	0	0	0	0	0	0	0.605	0.736	0.673	0.659	1.655	0.777	0.945	0.000	0.000	0.000	0.000	0.000	0.000	0.000	0.000	0.000	0.000	0.000	0.000	0.000	0.000	52	420	3164	5462	-0.724	Error	Error	1193	1971	0	0	2315	3147	0	0	0	0
1	14	12	""	"iYDR170W-A-0"	4370	26880	80	2246	5840	6766	87	95	45	100	98	0	3615	9587	10617	71	76	30	100	100	0	0	0	0	0	0	0	0	0	0	0	0	0	0	0	0	0	0	0	0.609	0.605	0.527	0.524	1.892	0.613	0.912	0.000	0.000	0.000	0.000	0.000	0.000	0.000	0.000	0.000	0.000	0.000	0.000	0.000	0.000	52	340	5703	15269	-0.715	Error	Error	2159	3544	0	0	5753	9516	0	0	0	0
1	15	12	""	"iYDR173C"	4570	26880	70	2158	2456	1696	98	103	44	100	100	0	3490	3401	2294	71	77	30	100	100	0	0	0	0	0	0	0	0	0	0	0	0	0	0	0	0	0	0	0	0.603	0.708	0.687	0.683	1.466	0.705	0.914	0.000	0.000	0.000	0.000	0.000	0.000	0.000	0.000	0.000	0.000	0.000	0.000	0.000	0.000	32	236	5479	5688	-0.731	Error	Error	2060	3419	0	0	2358	3330	0	0	0	0
1	16	12	""	"iYDR189W"	4770	26880	70	633	670	473	88	94	51	96	75	0	401	621	405	72	79	37	100	96	0	0	0	0	0	0	0	0	0	0	0	0	0	0	0	0	0	0	0	1.657	1.060	1.036	0.900	1.892	1.124	0.862	0.000	0.000	0.000	0.000	0.000	0.000	0.000	0.000	0.000	0.000	0.000	0.000	0.000	0.000	32	236	874	1131	0.728	Error	Error	545	329	0	0	582	549	0	0	0	0
1	17	12	""	"iYDR194C"	4980	26880	80	635	1271	1326	91	97	44	98	94	0	1331	2552	2614	71	77	33	100	100	0	0	0	0	0	0	0	0	0	0	0	0	0	0	0	0	0	0	0	0.432	0.476	0.427	0.424	1.668	0.481	0.912	0.000	0.000	0.000	0.000	0.000	0.000	0.000	0.000	0.000	0.000	0.000	0.000	0.000	0.000	52	340	1804	3661	-1.212	Error	Error	544	1260	0	0	1180	2481	0	0	0	0
1	18	12	""	"iYDR198C"	5170	26890	70	1330	1420	934	88	93	36	100	100	0	1796	2059	1211	74	80	33	100	100	0	0	0	0	0	0	0	0	0	0	0	0	0	0	0	0	0	0	0	0.721	0.671	0.591	0.581	1.574	0.700	0.921	0.000	0.000	0.000	0.000	0.000	0.000	0.000	0.000	0.000	0.000	0.000	0.000	0.000	0.000	32	236	2964	3317	-0.471	Error	Error	1242	1722	0	0	1332	1985	0	0	0	0
1	19	12	""	"iYDR214W"	5380	26880	70	412	527	376	89	95	38	96	87	0	467	491	266	71	78	30	100	100	0	0	0	0	0	0	0	0	0	0	0	0	0	0	0	0	0	0	0	0.816	1.043	0.929	0.847	1.850	1.187	0.849	0.000	0.000	0.000	0.000	0.000	0.000	0.000	0.000	0.000	0.000	0.000	0.000	0.000	0.000	32	236	719	858	-0.294	Error	Error	323	396	0	0	438	420	0	0	0	0
1	20	12	""	"iYDR218C"	5570	26880	80	699	1656	1835	91	96	40	94	88	0	1057	2961	3194	71	76	26	100	100	0	0	0	0	0	0	0	0	0	0	0	0	0	0	0	0	0	0	0	0.617	0.542	0.498	0.420	2.277	0.553	0.940	0.000	0.000	0.000	0.000	0.000	0.000	0.000	0.000	0.000	0.000	0.000	0.000	0.000	0.000	52	340	1594	4455	-0.698	Error	Error	608	986	0	0	1565	2890	0	0	0	0
1	21	12	""	"iYDR223W"	5770	26880	80	547	1270	1280	93	93	37	98	96	0	1181	2561	2533	64	68	23	100	100	0	0	0	0	0	0	0	0	0	0	0	0	0	0	0	0	0	0	0	0.406	0.471	0.389	0.409	1.688	0.482	0.930	0.000	0.000	0.000	0.000	0.000	0.000	0.000	0.000	0.000	0.000	0.000	0.000	0.000	0.000	52	340	1571	3674	-1.299	Error	Error	454	1117	0	0	1177	2497	0	0	0	0
1	1	13	""	"iYDR532C"	1750	27100	50	183	185	82	83	100	57	66	33	0	245	245	61	77	95	56	100	83	0	0	0	0	0	0	0	0	0	0	0	0	0	0	0	0	0	0	0	0.595	0.607	0.565	0.570	2.278	0.679	0.453	0.000	0.000	0.000	0.000	0.000	0.000	0.000	0.000	0.000	0.000	0.000	0.000	0.000	0.000	12	80	268	270	-0.748	Error	Error	100	168	0	0	102	168	0	0	0	0
1	2	13	""	"iYDR535C"	1960	27120	50	1270	1169	900	77	115	164	91	66	0	1444	2091	1693	63	138	539	75	66	0	0	0	0	0	0	0	0	0	0	0	0	0	0	0	0	0	0	0	0.864	0.538	0.523	0.568	1.980	0.788	0.597	0.000	0.000	0.000	0.000	0.000	0.000	0.000	0.000	0.000	0.000	0.000	0.000	0.000	0.000	12	104	2574	3120	-0.211	Error	Error	1193	1381	0	0	1092	2028	0	0	0	0
1	3	13	""	"iYDR539W-1"	2180	27080	150	88	97	45	92	145	1027	0	0	0	61	69	37	71	110	483	0	0	0	0	0	0	0	0	0	0	0	0	0	0	0	0	0	0	0	0	0	0.400	-2.500	1.401	1.461	3.647	1.059	0.138	0.000	0.000	0.000	0.000	0.000	0.000	0.000	0.000	0.000	0.000	0.000	0.000	0.000	0.000	156	994	-14	3	-1.322	Error	Error	-4	-10	0	0	5	-2	0	0	-50	0
1	4	13	""	"iYEL073C-4"	2360	27090	60	251	222	113	98	101	46	65	56	0	340	400	246	75	95	66	90	81	0	0	0	0	0	0	0	0	0	0	0	0	0	0	0	0	0	0	0	0.577	0.382	0.415	0.434	2.301	0.403	0.511	0.000	0.000	0.000	0.000	0.000	0.000	0.000	0.000	0.000	0.000	0.000	0.000	0.000	0.000	32	176	418	449	-0.792	Error	Error	153	265	0	0	124	325	0	0	0	0
1	5	13	""	"iYEL071W-1"	2580	27090	70	1885	2107	1194	92	116	251	100	96	0	2089	2377	1260	78	107	192	100	100	0	0	0	0	0	0	0	0	0	0	0	0	0	0	0	0	0	0	0	0.892	0.876	0.846	0.846	1.400	0.846	0.828	0.000	0.000	0.000	0.000	0.000	0.000	0.000	0.000	0.000	0.000	0.000	0.000	0.000	0.000	32	236	3804	4314	-0.166	Error	Error	1793	2011	0	0	2015	2299	0	0	0	0
1	6	13	""	"iYEL068C"	2800	27100	70	1610	1980	1256	89	154	416	96	84	0	1446	1904	1219	74	119	249	96	90	0	0	0	0	0	0	0	0	0	0	0	0	0	0	0	0	0	0	0	1.109	1.033	1.032	1.104	1.786	1.025	0.855	0.000	0.000	0.000	0.000	0.000	0.000	0.000	0.000	0.000	0.000	0.000	0.000	0.000	0.000	32	236	2893	3721	0.149	Error	Error	1521	1372	0	0	1891	1830	0	0	0	0
1	7	13	""	"iYEL051W"	2970	27090	70	544	736	495	94	135	181	93	53	0	945	1070	584	78	159	341	87	62	0	0	0	0	0	0	0	0	0	0	0	0	0	0	0	0	0	0	0	0.519	0.647	0.623	0.558	1.925	0.633	0.777	0.000	0.000	0.000	0.000	0.000	0.000	0.000	0.000	0.000	0.000	0.000	0.000	0.000	0.000	32	236	1317	1634	-0.946	Error	Error	450	867	0	0	642	992	0	0	0	0
1	8	13	""	"itG(GCC)E"	3170	27080	70	162	168	86	88	96	64	56	18	0	187	214	102	73	100	257	12	0	0	0	0	0	0	0	0	0	0	0	0	0	0	0	0	0	0	0	0	0.649	0.567	0.609	0.543	3.181	0.213	0.480	0.000	0.000	0.000	0.000	0.000	0.000	0.000	0.000	0.000	0.000	0.000	0.000	0.000	0.000	32	236	188	221	-0.623	Error	Error	74	114	0	0	80	141	0	0	0	0
1	9	13	""	"iYEL047C"	3380	27080	70	2796	2798	947	96	130	222	100	100	0	3527	3492	950	81	132	309	100	100	0	0	0	0	0	0	0	0	0	0	0	0	0	0	0	0	0	0	0	0.784	0.792	0.767	0.774	1.331	0.819	0.904	0.000	0.000	0.000	0.000	0.000	0.000	0.000	0.000	0.000	0.000	0.000	0.000	0.000	0.000	32	236	6146	6113	-0.352	Error	Error	2700	3446	0	0	2702	3411	0	0	0	0
1	10	13	""	"iYEL029C"	3570	27090	80	6909	6845	3298	92	100	49	100	100	0	8326	7934	3352	75	85	53	100	100	0	0	0	0	0	0	0	0	0	0	0	0	0	0	0	0	0	0	0	0.826	0.859	0.830	0.855	1.476	0.859	0.921	0.000	0.000	0.000	0.000	0.000	0.000	0.000	0.000	0.000	0.000	0.000	0.000	0.000	0.000	52	340	15068	14612	-0.275	Error	Error	6817	8251	0	0	6753	7859	0	0	0	0
1	11	13	""	"iYEL027W"	3770	27080	70	1450	2027	1581	99	132	196	100	100	0	1591	2077	1236	76	127	301	100	96	0	0	0	0	0	0	0	0	0	0	0	0	0	0	0	0	0	0	0	0.892	0.964	0.883	0.886	1.563	1.170	0.829	0.000	0.000	0.000	0.000	0.000	0.000	0.000	0.000	0.000	0.000	0.000	0.000	0.000	0.000	32	236	2866	3929	-0.165	Error	Error	1351	1515	0	0	1928	2001	0	0	0	0
1	12	13	""	"iYEL023C"	3960	27080	70	3585	4019	2000	99	438	1385	84	65	0	5496	6134	2863	78	676	2210	96	59	0	0	0	0	0	0	0	0	0	0	0	0	0	0	0	0	0	0	0	0.643	0.647	0.603	0.593	1.362	0.641	0.928	0.000	0.000	0.000	0.000	0.000	0.000	0.000	0.000	0.000	0.000	0.000	0.000	0.000	0.000	32	236	8904	9976	-0.636	Error	Error	3486	5418	0	0	3920	6056	0	0	0	0
1	13	13	""	"iYFL031W"	4190	27080	90	1512	1607	1096	91	97	45	100	100	0	2198	2092	1199	70	77	33	100	100	0	0	0	0	0	0	0	0	0	0	0	0	0	0	0	0	0	0	0	0.668	0.750	0.768	0.655	1.698	0.800	0.917	0.000	0.000	0.000	0.000	0.000	0.000	0.000	0.000	0.000	0.000	0.000	0.000	0.000	0.000	52	420	3549	3538	-0.583	Error	Error	1421	2128	0	0	1516	2022	0	0	0	0
1	14	13	""	"iYFL027C"	4390	27080	90	5940	6363	3683	95	98	40	100	100	0	4685	5167	2749	69	74	28	100	100	0	0	0	0	0	0	0	0	0	0	0	0	0	0	0	0	0	0	0	1.266	1.230	1.213	1.175	1.379	1.265	0.962	0.000	0.000	0.000	0.000	0.000	0.000	0.000	0.000	0.000	0.000	0.000	0.000	0.000	0.000	52	420	10461	11366	0.341	Error	Error	5845	4616	0	0	6268	5098	0	0	0	0
1	15	13	""	"iYFL023W"	4590	27070	80	1166	1607	1233	89	94	41	100	100	0	956	1304	888	74	81	34	100	100	0	0	0	0	0	0	0	0	0	0	0	0	0	0	0	0	0	0	0	1.221	1.234	1.175	1.104	1.484	1.312	0.927	0.000	0.000	0.000	0.000	0.000	0.000	0.000	0.000	0.000	0.000	0.000	0.000	0.000	0.000	52	340	1959	2748	0.288	Error	Error	1077	882	0	0	1518	1230	0	0	0	0
1	16	13	""	"iYFL009W"	4780	27070	70	426	503	337	91	98	41	90	84	0	461	605	363	74	82	54	100	93	0	0	0	0	0	0	0	0	0	0	0	0	0	0	0	0	0	0	0	0.866	0.776	0.755	0.602	2.902	0.826	0.800	0.000	0.000	0.000	0.000	0.000	0.000	0.000	0.000	0.000	0.000	0.000	0.000	0.000	0.000	32	236	722	943	-0.208	Error	Error	335	387	0	0	412	531	0	0	0	0
1	17	13	""	"iYFL005W"	4990	27070	90	4750	5076	3606	89	98	48	100	100	0	4205	3965	2443	71	76	30	98	98	0	0	0	0	0	0	0	0	0	0	0	0	0	0	0	0	0	0	0	1.127	1.281	1.232	1.191	1.538	1.359	0.953	0.000	0.000	0.000	0.000	0.000	0.000	0.000	0.000	0.000	0.000	0.000	0.000	0.000	0.000	52	420	8795	8881	0.173	Error	Error	4661	4134	0	0	4987	3894	0	0	0	0
1	18	13	""	"iYFLWdelta5"	5180	27070	80	1800	3573	3410	89	96	43	100	98	0	790	1739	1594	70	76	33	100	100	0	0	0	0	0	0	0	0	0	0	0	0	0	0	0	0	0	0	0	2.376	2.087	1.955	1.944	1.743	2.159	0.945	0.000	0.000	0.000	0.000	0.000	0.000	0.000	0.000	0.000	0.000	0.000	0.000	0.000	0.000	52	340	2431	5153	1.249	Error	Error	1711	720	0	0	3484	1669	0	0	0	0
1	19	13	""	"iYFR009W"	5390	27070	90	1672	2453	2041	92	99	57	100	100	0	1567	2079	1538	74	80	29	100	100	0	0	0	0	0	0	0	0	0	0	0	0	0	0	0	0	0	0	0	1.058	1.178	1.039	1.076	1.673	1.255	0.927	0.000	0.000	0.000	0.000	0.000	0.000	0.000	0.000	0.000	0.000	0.000	0.000	0.000	0.000	52	420	3073	4366	0.082	Error	Error	1580	1493	0	0	2361	2005	0	0	0	0
1	20	13	""	"iYFR012W"	5590	27070	90	5787	7189	6023	89	96	42	100	100	0	4123	4530	3405	72	79	30	100	100	0	0	0	0	0	0	0	0	0	0	0	0	0	0	0	0	0	0	0	1.407	1.593	1.537	1.418	1.654	1.686	0.962	0.000	0.000	0.000	0.000	0.000	0.000	0.000	0.000	0.000	0.000	0.000	0.000	0.000	0.000	52	420	9749	11558	0.492	Error	Error	5698	4051	0	0	7100	4458	0	0	0	0
1	21	13	""	"iYFR016C"	5780	27070	80	991	1352	937	90	95	40	100	98	0	1506	1649	1035	70	73	24	100	100	0	0	0	0	0	0	0	0	0	0	0	0	0	0	0	0	0	0	0	0.627	0.799	0.784	0.741	1.625	0.834	0.925	0.000	0.000	0.000	0.000	0.000	0.000	0.000	0.000	0.000	0.000	0.000	0.000	0.000	0.000	52	340	2337	2841	-0.672	Error	Error	901	1436	0	0	1262	1579	0	0	0	0
1	1	14	""	"iYFR027W"	1800	27290	50	307	724	1026	85	98	55	66	66	0	284	843	1501	57	77	67	66	58	0	0	0	0	0	0	0	0	0	0	0	0	0	0	0	0	0	0	0	0.978	0.813	0.673	0.887	3.991	0.746	0.870	0.000	0.000	0.000	0.000	0.000	0.000	0.000	0.000	0.000	0.000	0.000	0.000	0.000	0.000	12	104	449	1425	-0.032	Error	Error	222	227	0	0	639	786	0	0	0	0
1	2	14	""	"iYFR030W"	2000	27290	80	563	913	778	81	90	42	94	88	0	491	599	461	55	62	28	86	84	0	0	0	0	0	0	0	0	0	0	0	0	0	0	0	0	0	0	0	1.106	1.529	1.473	1.631	2.473	1.656	0.866	0.000	0.000	0.000	0.000	0.000	0.000	0.000	0.000	0.000	0.000	0.000	0.000	0.000	0.000	52	335	918	1376	0.145	Error	Error	482	436	0	0	832	544	0	0	0	0
1	3	14	""	"iYFR032C-A"	2180	27290	90	2426	2443	1583	91	98	49	100	100	0	3835	3932	2311	71	83	50	100	100	0	0	0	0	0	0	0	0	0	0	0	0	0	0	0	0	0	0	0	0.620	0.609	0.601	0.577	1.414	0.625	0.946	0.000	0.000	0.000	0.000	0.000	0.000	0.000	0.000	0.000	0.000	0.000	0.000	0.000	0.000	52	408	6099	6213	-0.689	Error	Error	2335	3764	0	0	2352	3861	0	0	0	0
1	4	14	""	"iYGL002W"	2380	27290	60	7382	7050	3526	95	100	44	100	100	0	2570	2647	1135	78	84	33	100	100	0	0	0	0	0	0	0	0	0	0	0	0	0	0	0	0	0	0	0	2.924	2.707	2.736	2.493	1.369	2.869	0.951	0.000	0.000	0.000	0.000	0.000	0.000	0.000	0.000	0.000	0.000	0.000	0.000	0.000	0.000	32	176	9779	9524	1.548	Error	Error	7287	2492	0	0	6955	2569	0	0	0	0
1	5	14	""	"iYGR002C"	2580	27280	80	2660	4108	3334	97	101	47	100	100	0	992	1599	1137	79	87	40	98	98	0	0	0	0	0	0	0	0	0	0	0	0	0	0	0	0	0	0	0	2.807	2.639	2.602	2.449	1.773	2.819	0.955	0.000	0.000	0.000	0.000	0.000	0.000	0.000	0.000	0.000	0.000	0.000	0.000	0.000	0.000	52	340	3476	5531	1.489	Error	Error	2563	913	0	0	4011	1520	0	0	0	0
1	6	14	""	"iYGR006W"	2790	27280	80	12755	11988	7897	92	97	45	100	100	0	5301	5954	3435	80	89	43	98	98	0	0	0	0	0	0	0	0	0	0	0	0	0	0	0	0	0	0	0	2.425	2.025	1.987	1.900	1.589	2.148	0.955	0.000	0.000	0.000	0.000	0.000	0.000	0.000	0.000	0.000	0.000	0.000	0.000	0.000	0.000	52	340	17884	17770	1.278	Error	Error	12663	5221	0	0	11896	5874	0	0	0	0
1	7	14	""	"iYGR026W"	2980	27280	80	2731	3643	2664	87	94	44	100	100	0	2904	3246	2012	76	84	39	100	98	0	0	0	0	0	0	0	0	0	0	0	0	0	0	0	0	0	0	0	0.935	1.122	1.064	1.041	1.574	1.202	0.933	0.000	0.000	0.000	0.000	0.000	0.000	0.000	0.000	0.000	0.000	0.000	0.000	0.000	0.000	52	340	5472	6726	-0.097	Error	Error	2644	2828	0	0	3556	3170	0	0	0	0
1	8	14	""	"iYGR028W"	3180	27280	70	2889	4007	2398	93	103	56	100	100	0	3008	3103	1634	78	90	55	100	100	0	0	0	0	0	0	0	0	0	0	0	0	0	0	0	0	0	0	0	0.954	1.294	1.268	1.206	1.354	1.352	0.938	0.000	0.000	0.000	0.000	0.000	0.000	0.000	0.000	0.000	0.000	0.000	0.000	0.000	0.000	32	236	5726	6939	-0.068	Error	Error	2796	2930	0	0	3914	3025	0	0	0	0
1	9	14	""	"iYGR030C"	3370	27280	90	1127	1433	818	92	98	44	100	100	0	2575	2617	1347	75	83	34	100	100	0	0	0	0	0	0	0	0	0	0	0	0	0	0	0	0	0	0	0	0.414	0.528	0.504	0.522	1.498	0.534	0.915	0.000	0.000	0.000	0.000	0.000	0.000	0.000	0.000	0.000	0.000	0.000	0.000	0.000	0.000	52	420	3535	3883	-1.272	Error	Error	1035	2500	0	0	1341	2542	0	0	0	0
1	10	14	""	"iYGR043C-0"	3590	27270	80	354	480	358	90	94	41	94	88	0	604	895	753	72	75	26	96	96	0	0	0	0	0	0	0	0	0	0	0	0	0	0	0	0	0	0	0	0.496	0.474	0.432	0.473	1.878	0.456	0.864	0.000	0.000	0.000	0.000	0.000	0.000	0.000	0.000	0.000	0.000	0.000	0.000	0.000	0.000	52	340	796	1213	-1.011	Error	Error	264	532	0	0	390	823	0	0	0	0
1	11	14	""	"iYGR047C"	3790	27280	90	1765	2351	1804	85	92	44	100	98	0	3108	4056	2785	70	77	32	100	100	0	0	0	0	0	0	0	0	0	0	0	0	0	0	0	0	0	0	0	0.553	0.568	0.539	0.491	1.678	0.587	0.921	0.000	0.000	0.000	0.000	0.000	0.000	0.000	0.000	0.000	0.000	0.000	0.000	0.000	0.000	52	414	4718	6252	-0.855	Error	Error	1680	3038	0	0	2266	3986	0	0	0	0
1	12	14	""	"iYGR051C"	3970	27280	80	479	666	524	85	91	41	98	94	0	797	989	728	69	75	30	100	100	0	0	0	0	0	0	0	0	0	0	0	0	0	0	0	0	0	0	0	0.541	0.632	0.604	0.576	1.879	0.656	0.863	0.000	0.000	0.000	0.000	0.000	0.000	0.000	0.000	0.000	0.000	0.000	0.000	0.000	0.000	52	340	1122	1501	-0.886	Error	Error	394	728	0	0	581	920	0	0	0	0
1	13	14	""	"iYGR067C"	4180	27280	70	213	288	196	94	100	44	75	62	0	509	821	754	72	85	49	100	96	0	0	0	0	0	0	0	0	0	0	0	0	0	0	0	0	0	0	0	0.272	0.259	0.243	0.266	1.975	0.218	0.604	0.000	0.000	0.000	0.000	0.000	0.000	0.000	0.000	0.000	0.000	0.000	0.000	0.000	0.000	32	236	556	943	-1.877	Error	Error	119	437	0	0	194	749	0	0	0	0
1	14	14	""	"iYGR072W"	4380	27280	70	112	123	59	89	94	40	40	18	0	137	150	66	71	77	26	81	56	0	0	0	0	0	0	0	0	0	0	0	0	0	0	0	0	0	0	0	0.348	0.430	0.675	0.602	3.645	0.865	0.303	0.000	0.000	0.000	0.000	0.000	0.000	0.000	0.000	0.000	0.000	0.000	0.000	0.000	0.000	32	236	89	113	-1.521	Error	Error	23	66	0	0	34	79	0	0	0	0
1	15	14	""	"iYGR078C"	4580	27280	80	909	1556	1198	87	94	45	100	100	0	2081	2328	1554	76	80	27	100	100	0	0	0	0	0	0	0	0	0	0	0	0	0	0	0	0	0	0	0	0.410	0.652	0.586	0.585	1.584	0.692	0.929	0.000	0.000	0.000	0.000	0.000	0.000	0.000	0.000	0.000	0.000	0.000	0.000	0.000	0.000	52	340	2827	3721	-1.286	Error	Error	822	2005	0	0	1469	2252	0	0	0	0
1	16	14	""	"iYHR009C"	4780	27270	90	1356	2316	1988	89	97	45	100	100	0	2602	3434	2752	74	79	30	100	100	0	0	0	0	0	0	0	0	0	0	0	0	0	0	0	0	0	0	0	0.501	0.663	0.674	0.621	1.518	0.678	0.936	0.000	0.000	0.000	0.000	0.000	0.000	0.000	0.000	0.000	0.000	0.000	0.000	0.000	0.000	52	420	3795	5587	-0.997	Error	Error	1267	2528	0	0	2227	3360	0	0	0	0
1	17	14	""	"iYHR013C"	4990	27270	90	2070	4207	4481	97	100	43	100	100	0	1530	2542	2434	72	80	35	98	98	0	0	0	0	0	0	0	0	0	0	0	0	0	0	0	0	0	0	0	1.353	1.664	1.418	1.381	2.062	1.794	0.943	0.000	0.000	0.000	0.000	0.000	0.000	0.000	0.000	0.000	0.000	0.000	0.000	0.000	0.000	52	420	3431	6580	0.436	Error	Error	1973	1458	0	0	4110	2470	0	0	0	0
1	18	14	""	"iYHRWdelta7"	5180	27280	80	379	1004	1033	86	93	39	88	84	0	485	1149	1067	71	77	27	100	98	0	0	0	0	0	0	0	0	0	0	0	0	0	0	0	0	0	0	0	0.708	0.852	0.763	0.700	1.844	0.919	0.935	0.000	0.000	0.000	0.000	0.000	0.000	0.000	0.000	0.000	0.000	0.000	0.000	0.000	0.000	52	340	707	1996	-0.499	Error	Error	293	414	0	0	918	1078	0	0	0	0
1	19	14	""	"iYHR027C"	5390	27280	90	688	922	804	90	95	39	100	96	0	1217	1968	1678	73	80	33	100	100	0	0	0	0	0	0	0	0	0	0	0	0	0	0	0	0	0	0	0	0.523	0.439	0.385	0.365	1.760	0.448	0.922	0.000	0.000	0.000	0.000	0.000	0.000	0.000	0.000	0.000	0.000	0.000	0.000	0.000	0.000	52	420	1742	2727	-0.936	Error	Error	598	1144	0	0	832	1895	0	0	0	0
1	20	14	""	"iYHR031C"	5570	27270	70	1041	1035	574	91	96	42	100	96	0	1928	1966	1117	75	86	42	100	96	0	0	0	0	0	0	0	0	0	0	0	0	0	0	0	0	0	0	0	0.513	0.499	0.501	0.508	1.880	0.470	0.879	0.000	0.000	0.000	0.000	0.000	0.000	0.000	0.000	0.000	0.000	0.000	0.000	0.000	0.000	32	236	2803	2835	-0.964	Error	Error	950	1853	0	0	944	1891	0	0	0	0
1	21	14	""	"iYHR035W"	5780	27270	80	433	934	1008	85	94	45	94	86	0	633	1508	1688	71	77	28	100	100	0	0	0	0	0	0	0	0	0	0	0	0	0	0	0	0	0	0	0	0.619	0.591	0.569	0.528	2.081	0.581	0.914	0.000	0.000	0.000	0.000	0.000	0.000	0.000	0.000	0.000	0.000	0.000	0.000	0.000	0.000	52	340	910	2286	-0.691	Error	Error	348	562	0	0	849	1437	0	0	0	0
1	1	15	""	"iYHR048W"	1800	27480	70	856	1104	838	89	98	50	96	90	0	2448	2826	2118	67	93	96	96	96	0	0	0	0	0	0	0	0	0	0	0	0	0	0	0	0	0	0	0	0.322	0.368	0.399	0.366	1.939	0.372	0.934	0.000	0.000	0.000	0.000	0.000	0.000	0.000	0.000	0.000	0.000	0.000	0.000	0.000	0.000	32	231	3148	3774	-1.634	Error	Error	767	2381	0	0	1015	2759	0	0	0	0
1	2	15	""	"iYHR052W"	1980	27490	150	96	107	74	89	94	44	18	8	0	54	67	61	65	75	40	8	3	0	0	0	0	0	0	0	0	0	0	0	0	0	0	0	0	0	0	0	-0.636	9.000	1.705	1.388	3.126	1.934	0.109	0.000	0.000	0.000	0.000	0.000	0.000	0.000	0.000	0.000	0.000	0.000	0.000	0.000	0.000	156	961	-4	20	Error	Error	Error	7	-11	0	0	18	2	0	0	-50	0
1	3	15	""	"iYHR056C"	2190	27480	90	2933	4278	3337	93	99	45	100	100	0	5459	6600	4338	75	79	34	100	100	0	0	0	0	0	0	0	0	0	0	0	0	0	0	0	0	0	0	0	0.527	0.641	0.590	0.557	1.468	0.686	0.951	0.000	0.000	0.000	0.000	0.000	0.000	0.000	0.000	0.000	0.000	0.000	0.000	0.000	0.000	52	408	8224	10710	-0.923	Error	Error	2840	5384	0	0	4185	6525	0	0	0	0
1	4	15	""	"itF(GAA)H1"	2380	27490	100	7445	6613	2800	92	98	44	100	100	0	13106	11979	3988	82	91	58	100	100	0	0	0	0	0	0	0	0	0	0	0	0	0	0	0	0	0	0	0	0.565	0.548	0.546	0.509	1.321	0.568	0.954	0.000	0.000	0.000	0.000	0.000	0.000	0.000	0.000	0.000	0.000	0.000	0.000	0.000	0.000	80	533	20377	18418	-0.825	Error	Error	7353	13024	0	0	6521	11897	0	0	0	0
1	5	15	""	"iYHR075C"	2580	27490	100	15154	14297	6365	93	104	63	100	98	0	11463	10349	3417	83	98	102	100	98	0	0	0	0	0	0	0	0	0	0	0	0	0	0	0	0	0	0	0	1.323	1.384	1.390	1.264	1.375	1.470	0.946	0.000	0.000	0.000	0.000	0.000	0.000	0.000	0.000	0.000	0.000	0.000	0.000	0.000	0.000	80	491	26441	24470	0.404	Error	Error	15061	11380	0	0	14204	10266	0	0	0	0
1	6	15	""	"iYHR079C"	2780	27480	80	6879	6461	2699	92	103	67	100	100	0	9143	8257	2972	81	97	106	100	100	0	0	0	0	0	0	0	0	0	0	0	0	0	0	0	0	0	0	0	0.749	0.779	0.761	0.744	1.300	0.789	0.933	0.000	0.000	0.000	0.000	0.000	0.000	0.000	0.000	0.000	0.000	0.000	0.000	0.000	0.000	52	340	15849	14545	-0.417	Error	Error	6787	9062	0	0	6369	8176	0	0	0	0
1	7	15	""	"iYIL013C"	2980	27480	60	164	168	81	87	97	44	62	43	0	111	195	147	78	88	36	43	40	0	0	0	0	0	0	0	0	0	0	0	0	0	0	0	0	0	0	0	2.333	0.692	0.798	1.100	3.538	0.478	0.467	0.000	0.000	0.000	0.000	0.000	0.000	0.000	0.000	0.000	0.000	0.000	0.000	0.000	0.000	32	176	110	198	1.222	Error	Error	77	33	0	0	81	117	0	0	0	0
1	8	15	""	"iYIL009C-A"	3190	27490	90	1881	2597	2094	92	98	47	100	100	0	1348	1970	1387	83	95	45	100	98	0	0	0	0	0	0	0	0	0	0	0	0	0	0	0	0	0	0	0	1.414	1.328	1.225	1.165	1.698	1.422	0.939	0.000	0.000	0.000	0.000	0.000	0.000	0.000	0.000	0.000	0.000	0.000	0.000	0.000	0.000	52	420	3054	4392	0.500	Error	Error	1789	1265	0	0	2505	1887	0	0	0	0
1	9	15	""	"iYIL009W"	3390	27490	80	11678	12410	5597	97	100	43	100	100	0	5374	5339	2057	72	82	40	100	100	0	0	0	0	0	0	0	0	0	0	0	0	0	0	0	0	0	0	0	2.184	2.338	2.261	2.236	1.314	2.445	0.952	0.000	0.000	0.000	0.000	0.000	0.000	0.000	0.000	0.000	0.000	0.000	0.000	0.000	0.000	52	340	16883	17580	1.127	Error	Error	11581	5302	0	0	12313	5267	0	0	0	0
1	10	15	""	"itE(UUC)I"	3580	27480	70	1842	1802	937	91	104	78	100	100	0	1466	1497	686	72	95	118	100	100	0	0	0	0	0	0	0	0	0	0	0	0	0	0	0	0	0	0	0	1.256	1.201	1.208	1.136	1.332	1.214	0.921	0.000	0.000	0.000	0.000	0.000	0.000	0.000	0.000	0.000	0.000	0.000	0.000	0.000	0.000	32	236	3145	3136	0.329	Error	Error	1751	1394	0	0	1711	1425	0	0	0	0
1	11	15	""	"iYIR010W"	3780	27480	60	536	663	444	96	99	43	100	90	0	427	451	224	70	77	28	96	96	0	0	0	0	0	0	0	0	0	0	0	0	0	0	0	0	0	0	0	1.232	1.488	1.434	1.308	2.521	1.793	0.771	0.000	0.000	0.000	0.000	0.000	0.000	0.000	0.000	0.000	0.000	0.000	0.000	0.000	0.000	32	176	797	948	0.302	Error	Error	440	357	0	0	567	381	0	0	0	0
1	12	15	""	"iYIR014W"	3990	27470	70	2391	2168	1102	88	96	56	100	100	0	3636	3450	1411	74	82	55	100	100	0	0	0	0	0	0	0	0	0	0	0	0	0	0	0	0	0	0	0	0.647	0.616	0.597	0.557	1.326	0.652	0.931	0.000	0.000	0.000	0.000	0.000	0.000	0.000	0.000	0.000	0.000	0.000	0.000	0.000	0.000	32	236	5865	5456	-0.629	Error	Error	2303	3562	0	0	2080	3376	0	0	0	0
1	13	15	""	"iYIR026C"	4190	27480	60	3241	3054	1251	92	107	71	100	100	0	3352	3207	1005	76	88	53	100	100	0	0	0	0	0	0	0	0	0	0	0	0	0	0	0	0	0	0	0	0.961	0.946	0.938	0.884	1.402	0.994	0.902	0.000	0.000	0.000	0.000	0.000	0.000	0.000	0.000	0.000	0.000	0.000	0.000	0.000	0.000	32	176	6425	6093	-0.057	Error	Error	3149	3276	0	0	2962	3131	0	0	0	0
1	14	15	""	"iYIR030C"	4390	27480	80	1418	1710	1244	94	98	41	100	98	0	1536	1976	1365	73	83	51	100	100	0	0	0	0	0	0	0	0	0	0	0	0	0	0	0	0	0	0	0	0.905	0.849	0.822	0.749	1.595	0.870	0.934	0.000	0.000	0.000	0.000	0.000	0.000	0.000	0.000	0.000	0.000	0.000	0.000	0.000	0.000	52	340	2787	3519	-0.144	Error	Error	1324	1463	0	0	1616	1903	0	0	0	0
1	15	15	""	"iYIR034C"	4590	27480	80	3332	3123	1504	94	97	41	100	98	0	2907	2756	1147	74	82	38	100	100	0	0	0	0	0	0	0	0	0	0	0	0	0	0	0	0	0	0	0	1.143	1.129	1.125	1.057	1.402	1.171	0.942	0.000	0.000	0.000	0.000	0.000	0.000	0.000	0.000	0.000	0.000	0.000	0.000	0.000	0.000	52	340	6071	5711	0.193	Error	Error	3238	2833	0	0	3029	2682	0	0	0	0
1	16	15	""	"iYJL223C-0"	4790	27470	90	19089	17212	6742	98	122	255	100	100	0	18825	17474	5552	74	83	35	100	100	0	0	0	0	0	0	0	0	0	0	0	0	0	0	0	0	0	0	0	1.013	0.984	0.989	0.931	1.343	1.031	0.883	0.000	0.000	0.000	0.000	0.000	0.000	0.000	0.000	0.000	0.000	0.000	0.000	0.000	0.000	52	420	37742	34514	0.018	Error	Error	18991	18751	0	0	17114	17400	0	0	0	0
1	17	15	""	"iYJL219W"	4990	27470	90	5366	5150	2150	96	103	45	100	100	0	7062	6800	2329	76	87	43	100	100	0	0	0	0	0	0	0	0	0	0	0	0	0	0	0	0	0	0	0	0.754	0.752	0.703	0.714	1.353	0.766	0.926	0.000	0.000	0.000	0.000	0.000	0.000	0.000	0.000	0.000	0.000	0.000	0.000	0.000	0.000	52	420	12256	11778	-0.407	Error	Error	5270	6986	0	0	5054	6724	0	0	0	0
1	18	15	""	"iYJL215C"	5190	27470	70	413	464	244	94	99	44	96	96	0	747	824	374	77	84	34	100	100	0	0	0	0	0	0	0	0	0	0	0	0	0	0	0	0	0	0	0	0.476	0.495	0.487	0.462	1.636	0.513	0.767	0.000	0.000	0.000	0.000	0.000	0.000	0.000	0.000	0.000	0.000	0.000	0.000	0.000	0.000	32	236	989	1117	-1.071	Error	Error	319	670	0	0	370	747	0	0	0	0
1	19	15	""	"iYJR093C"	5390	27470	80	4064	3755	1573	88	94	39	100	100	0	3410	3356	1211	71	78	27	100	100	0	0	0	0	0	0	0	0	0	0	0	0	0	0	0	0	0	0	0	1.191	1.116	1.116	1.062	1.323	1.153	0.934	0.000	0.000	0.000	0.000	0.000	0.000	0.000	0.000	0.000	0.000	0.000	0.000	0.000	0.000	52	340	7315	6952	0.252	Error	Error	3976	3339	0	0	3667	3285	0	0	0	0
1	20	15	""	"iYJR095W"	5600	27470	80	3188	3018	1413	93	98	47	100	100	0	5230	4591	1929	75	83	43	100	100	0	0	0	0	0	0	0	0	0	0	0	0	0	0	0	0	0	0	0	0.600	0.648	0.638	0.652	1.695	0.668	0.920	0.000	0.000	0.000	0.000	0.000	0.000	0.000	0.000	0.000	0.000	0.000	0.000	0.000	0.000	52	340	8250	7441	-0.736	Error	Error	3095	5155	0	0	2925	4516	0	0	0	0
1	21	15	""	"iYJR099W"	5790	27470	70	273	335	295	90	93	38	96	81	0	369	477	391	75	78	24	100	100	0	0	0	0	0	0	0	0	0	0	0	0	0	0	0	0	0	0	0	0.622	0.609	0.540	0.562	1.703	0.693	0.818	0.000	0.000	0.000	0.000	0.000	0.000	0.000	0.000	0.000	0.000	0.000	0.000	0.000	0.000	32	230	477	647	-0.684	Error	Error	183	294	0	0	245	402	0	0	0	0
1	1	16	""	"iYJR115W"	1790	27690	90	3438	3113	1286	87	89	38	100	100	0	9133	8239	2943	62	70	35	100	100	0	0	0	0	0	0	0	0	0	0	0	0	0	0	0	0	0	0	0	0.369	0.370	0.349	0.359	1.239	0.364	0.908	0.000	0.000	0.000	0.000	0.000	0.000	0.000	0.000	0.000	0.000	0.000	0.000	0.000	0.000	52	420	12422	11203	-1.437	Error	Error	3351	9071	0	0	3026	8177	0	0	0	0
1	2	16	""	"iYJR119C"	2000	27690	80	189	299	318	92	97	41	59	53	0	195	552	679	81	87	41	63	53	0	0	0	0	0	0	0	0	0	0	0	0	0	0	0	0	0	0	0	0.851	0.439	0.562	0.738	4.003	0.412	0.614	0.000	0.000	0.000	0.000	0.000	0.000	0.000	0.000	0.000	0.000	0.000	0.000	0.000	0.000	52	335	211	678	-0.233	Error	Error	97	114	0	0	207	471	0	0	0	0
1	3	16	""	"iYJR123W"	2200	27700	70	3012	3683	2042	91	124	212	100	100	0	1922	2088	942	80	95	86	100	100	0	0	0	0	0	0	0	0	0	0	0	0	0	0	0	0	0	0	0	1.586	1.789	1.725	1.670	1.421	1.915	0.913	0.000	0.000	0.000	0.000	0.000	0.000	0.000	0.000	0.000	0.000	0.000	0.000	0.000	0.000	32	236	4763	5600	0.665	Error	Error	2921	1842	0	0	3592	2008	0	0	0	0
1	4	16	""	"iYJR140C"	2400	27720	50	2326	2936	2760	95	190	403	91	75	0	4104	3866	2583	87	219	554	83	83	0	0	0	0	0	0	0	0	0	0	0	0	0	0	0	0	0	0	0	0.555	0.752	0.521	0.742	4.157	0.781	0.689	0.000	0.000	0.000	0.000	0.000	0.000	0.000	0.000	0.000	0.000	0.000	0.000	0.000	0.000	12	104	6248	6620	-0.848	Error	Error	2231	4017	0	0	2841	3779	0	0	0	0
1	5	16	""	"iYJR144W"	2570	27680	150	79	88	41	90	108	170	0	0	0	88	94	39	87	107	177	0	0	0	0	0	0	0	0	0	0	0	0	0	0	0	0	0	0	0	0	0	-11.000	-0.286	1.625	1.842	3.419	1.898	0.816	0.000	0.000	0.000	0.000	0.000	0.000	0.000	0.000	0.000	0.000	0.000	0.000	0.000	0.000	156	968	-10	5	Error	Error	Error	-11	1	0	0	-2	7	0	0	-50	0
1	6	16	""	"iYJR149W"	2790	27670	70	250	1391	1669	92	107	92	53	50	0	169	1234	1538	98	115	127	46	46	0	0	0	0	0	0	0	0	0	0	0	0	0	0	0	0	0	0	0	2.225	1.143	1.101	1.021	2.787	0.968	0.882	0.000	0.000	0.000	0.000	0.000	0.000	0.000	0.000	0.000	0.000	0.000	0.000	0.000	0.000	32	236	229	2435	1.154	Error	Error	158	71	0	0	1299	1136	0	0	0	0
1	7	16	""	"iYJR159W"	2990	27680	60	11298	11230	3979	88	165	494	100	100	0	17963	17135	4356	122	136	119	100	100	0	0	0	0	0	0	0	0	0	0	0	0	0	0	0	0	0	0	0	0.628	0.655	0.637	0.629	1.250	0.679	0.885	0.000	0.000	0.000	0.000	0.000	0.000	0.000	0.000	0.000	0.000	0.000	0.000	0.000	0.000	32	176	29051	28155	-0.670	Error	Error	11210	17841	0	0	11142	17013	0	0	0	0
1	8	16	""	"iYKL225W"	3220	27680	70	35092	29598	23570	102	329	2694	81	68	3	19843	20369	15905	127	234	1247	84	71	0	0	0	0	0	0	0	0	0	0	0	0	0	0	0	0	0	0	0	1.775	1.457	1.411	1.540	3.118	1.588	0.758	0.000	0.000	0.000	0.000	0.000	0.000	0.000	0.000	0.000	0.000	0.000	0.000	0.000	0.000	32	236	54706	49738	0.828	Error	Error	34990	19716	0	0	29496	20242	0	0	0	0
1	9	16	""	"iYKL221W-0"	3400	27680	80	4639	4352	1700	94	159	455	100	98	0	5335	5099	1591	78	130	449	100	100	0	0	0	0	0	0	0	0	0	0	0	0	0	0	0	0	0	0	0	0.865	0.848	0.877	0.817	1.268	0.888	0.934	0.000	0.000	0.000	0.000	0.000	0.000	0.000	0.000	0.000	0.000	0.000	0.000	0.000	0.000	52	340	9802	9279	-0.210	Error	Error	4545	5257	0	0	4258	5021	0	0	0	0
1	10	16	""	"iYKR062W"	3580	27690	90	507	524	281	92	96	45	98	92	0	627	728	354	75	82	70	98	96	0	0	0	0	0	0	0	0	0	0	0	0	0	0	0	0	0	0	0	0.752	0.662	0.615	0.631	1.969	0.654	0.774	0.000	0.000	0.000	0.000	0.000	0.000	0.000	0.000	0.000	0.000	0.000	0.000	0.000	0.000	52	414	967	1085	-0.412	Error	Error	415	552	0	0	432	653	0	0	0	0
1	11	16	""	"iYKR066C"	3770	27680	90	5366	5308	2071	88	97	60	100	100	0	7217	6447	2049	76	105	288	100	100	0	0	0	0	0	0	0	0	0	0	0	0	0	0	0	0	0	0	0	0.739	0.819	0.791	0.806	1.444	0.803	0.897	0.000	0.000	0.000	0.000	0.000	0.000	0.000	0.000	0.000	0.000	0.000	0.000	0.000	0.000	52	420	12419	11591	-0.436	Error	Error	5278	7141	0	0	5220	6371	0	0	0	0
1	12	16	""	"iYKR070W"	3970	27680	90	3459	3866	2046	88	107	166	100	100	0	2325	2607	1211	75	96	192	98	98	0	0	0	0	0	0	0	0	0	0	0	0	0	0	0	0	0	0	0	1.498	1.492	1.484	1.451	1.666	1.576	0.886	0.000	0.000	0.000	0.000	0.000	0.000	0.000	0.000	0.000	0.000	0.000	0.000	0.000	0.000	52	420	5621	6310	0.583	Error	Error	3371	2250	0	0	3778	2532	0	0	0	0
1	13	16	""	"iYKR084C"	4180	27680	80	2736	2682	1423	89	91	39	100	98	0	3937	3884	1914	73	78	27	100	100	0	0	0	0	0	0	0	0	0	0	0	0	0	0	0	0	0	0	0	0.685	0.680	0.687	0.668	1.448	0.684	0.933	0.000	0.000	0.000	0.000	0.000	0.000	0.000	0.000	0.000	0.000	0.000	0.000	0.000	0.000	52	340	6511	6404	-0.546	Error	Error	2647	3864	0	0	2593	3811	0	0	0	0
1	14	16	""	"iYKR088C"	4390	27680	80	1407	1508	953	90	94	40	100	96	0	2010	2077	1000	73	79	39	98	98	0	0	0	0	0	0	0	0	0	0	0	0	0	0	0	0	0	0	0	0.680	0.708	0.674	0.615	1.624	0.773	0.917	0.000	0.000	0.000	0.000	0.000	0.000	0.000	0.000	0.000	0.000	0.000	0.000	0.000	0.000	52	340	3254	3422	-0.557	Error	Error	1317	1937	0	0	1418	2004	0	0	0	0
1	15	16	""	"iYKR092C-0"	4590	27680	100	3151	2791	1190	95	101	57	98	97	0	6384	5769	2077	75	85	98	97	97	0	0	0	0	0	0	0	0	0	0	0	0	0	0	0	0	0	0	0	0.484	0.473	0.483	0.452	1.357	0.487	0.951	0.000	0.000	0.000	0.000	0.000	0.000	0.000	0.000	0.000	0.000	0.000	0.000	0.000	0.000	80	548	9365	8390	-1.046	Error	Error	3056	6309	0	0	2696	5694	0	0	0	0
1	16	16	""	"iYKR103W"	4790	27670	70	695	781	395	97	105	52	96	93	0	1479	1476	678	73	81	40	100	100	0	0	0	0	0	0	0	0	0	0	0	0	0	0	0	0	0	0	0	0.425	0.488	0.489	0.431	1.768	0.497	0.847	0.000	0.000	0.000	0.000	0.000	0.000	0.000	0.000	0.000	0.000	0.000	0.000	0.000	0.000	32	236	2004	2087	-1.233	Error	Error	598	1406	0	0	684	1403	0	0	0	0
1	17	16	""	"iYKR106W-1"	4990	27670	90	12058	11119	3730	101	108	56	100	100	0	12645	11873	2832	76	86	44	100	100	0	0	0	0	0	0	0	0	0	0	0	0	0	0	0	0	0	0	0	0.951	0.934	0.955	0.898	1.251	0.958	0.927	0.000	0.000	0.000	0.000	0.000	0.000	0.000	0.000	0.000	0.000	0.000	0.000	0.000	0.000	52	420	24526	22815	-0.072	Error	Error	11957	12569	0	0	11018	11797	0	0	0	0
1	18	16	""	"iYLL066C-1"	5170	27670	70	39637	38146	19729	99	1572	6991	96	81	3	36530	34463	14733	78	1641	6716	96	90	0	0	0	0	0	0	0	0	0	0	0	0	0	0	0	0	0	0	0	1.085	1.106	1.116	1.033	1.547	1.113	0.897	0.000	0.000	0.000	0.000	0.000	0.000	0.000	0.000	0.000	0.000	0.000	0.000	0.000	0.000	32	236	75990	72432	0.117	Error	Error	39538	36452	0	0	38047	34385	0	0	0	0
1	19	16	""	"iYLL050C"	5370	27670	90	1286	1412	660	92	100	57	100	100	0	2294	2363	956	75	86	73	100	100	0	0	0	0	0	0	0	0	0	0	0	0	0	0	0	0	0	0	0	0.538	0.577	0.561	0.545	1.538	0.556	0.893	0.000	0.000	0.000	0.000	0.000	0.000	0.000	0.000	0.000	0.000	0.000	0.000	0.000	0.000	52	420	3413	3608	-0.894	Error	Error	1194	2219	0	0	1320	2288	0	0	0	0
1	20	16	""	"iYLL044W"	5580	27670	90	5911	5426	1954	96	99	41	100	100	0	7090	6807	1918	75	84	75	100	100	0	0	0	0	0	0	0	0	0	0	0	0	0	0	0	0	0	0	0	0.829	0.792	0.806	0.763	1.316	0.782	0.921	0.000	0.000	0.000	0.000	0.000	0.000	0.000	0.000	0.000	0.000	0.000	0.000	0.000	0.000	52	420	12830	12062	-0.271	Error	Error	5815	7015	0	0	5330	6732	0	0	0	0
1	21	16	""	"iYLL040C"	5770	27670	90	1240	1311	560	90	95	42	100	100	0	2599	2502	1052	74	91	115	100	100	0	0	0	0	0	0	0	0	0	0	0	0	0	0	0	0	0	0	0	0.455	0.503	0.486	0.494	1.477	0.477	0.877	0.000	0.000	0.000	0.000	0.000	0.000	0.000	0.000	0.000	0.000	0.000	0.000	0.000	0.000	52	420	3675	3649	-1.135	Error	Error	1150	2525	0	0	1221	2428	0	0	0	0
1	1	17	""	"iYLR267W"	1790	27880	80	1098	1299	993	82	88	41	98	94	0	2361	2656	1895	68	74	26	100	100	0	0	0	0	0	0	0	0	0	0	0	0	0	0	0	0	0	0	0	0.443	0.470	0.490	0.443	1.638	0.479	0.906	0.000	0.000	0.000	0.000	0.000	0.000	0.000	0.000	0.000	0.000	0.000	0.000	0.000	0.000	52	340	3309	3805	-1.174	Error	Error	1016	2293	0	0	1217	2588	0	0	0	0
1	2	17	""	"itV(AAC)L"	1990	27890	80	307	420	349	85	88	37	82	76	0	453	676	497	70	77	33	98	98	0	0	0	0	0	0	0	0	0	0	0	0	0	0	0	0	0	0	0	0.580	0.553	0.522	0.438	2.135	0.606	0.843	0.000	0.000	0.000	0.000	0.000	0.000	0.000	0.000	0.000	0.000	0.000	0.000	0.000	0.000	52	340	605	941	-0.787	Error	Error	222	383	0	0	335	606	0	0	0	0
1	3	17	""	"iYLR275W"	2190	27870	50	225	246	121	90	98	46	83	83	0	212	213	119	76	90	38	66	58	0	0	0	0	0	0	0	0	0	0	0	0	0	0	0	0	0	0	0	0.993	1.139	1.082	1.281	2.388	1.212	0.473	0.000	0.000	0.000	0.000	0.000	0.000	0.000	0.000	0.000	0.000	0.000	0.000	0.000	0.000	12	104	271	293	-0.011	Error	Error	135	136	0	0	156	137	0	0	0	0
1	4	17	""	"iYLR293C"	2390	27880	70	600	761	480	88	94	42	96	96	0	1519	1836	958	76	81	41	100	100	0	0	0	0	0	0	0	0	0	0	0	0	0	0	0	0	0	0	0	0.355	0.382	0.346	0.323	1.726	0.392	0.856	0.000	0.000	0.000	0.000	0.000	0.000	0.000	0.000	0.000	0.000	0.000	0.000	0.000	0.000	32	236	1955	2433	-1.495	Error	Error	512	1443	0	0	673	1760	0	0	0	0
1	5	17	""	"iYLR298C"	2580	27880	90	2456	2801	1798	85	92	41	100	100	0	7222	7660	4115	76	82	32	100	100	0	0	0	0	0	0	0	0	0	0	0	0	0	0	0	0	0	0	0	0.332	0.358	0.360	0.341	1.461	0.369	0.924	0.000	0.000	0.000	0.000	0.000	0.000	0.000	0.000	0.000	0.000	0.000	0.000	0.000	0.000	52	406	9517	10300	-1.592	Error	Error	2371	7146	0	0	2716	7584	0	0	0	0
1	6	17	""	"iYLRCdelta18"	2790	27890	70	168	180	77	87	96	42	75	43	0	241	269	101	81	93	42	100	90	0	0	0	0	0	0	0	0	0	0	0	0	0	0	0	0	0	0	0	0.506	0.495	0.468	0.487	2.487	0.466	0.246	0.000	0.000	0.000	0.000	0.000	0.000	0.000	0.000	0.000	0.000	0.000	0.000	0.000	0.000	32	236	241	281	-0.982	Error	Error	81	160	0	0	93	188	0	0	0	0
1	7	17	""	"iYLR318W"	2980	27880	60	317	458	337	88	91	38	87	78	0	361	480	271	86	96	40	96	93	0	0	0	0	0	0	0	0	0	0	0	0	0	0	0	0	0	0	0	0.833	0.939	0.916	0.693	2.480	1.053	0.686	0.000	0.000	0.000	0.000	0.000	0.000	0.000	0.000	0.000	0.000	0.000	0.000	0.000	0.000	32	176	504	764	-0.264	Error	Error	229	275	0	0	370	394	0	0	0	0
1	8	17	""	"iYLR323C"	3180	27880	90	2454	3223	2567	94	101	46	100	100	0	3598	4530	3437	93	102	48	98	98	0	0	0	0	0	0	0	0	0	0	0	0	0	0	0	0	0	0	0	0.673	0.705	0.602	0.700	1.781	0.701	0.833	0.000	0.000	0.000	0.000	0.000	0.000	0.000	0.000	0.000	0.000	0.000	0.000	0.000	0.000	52	420	5865	7566	-0.571	Error	Error	2360	3505	0	0	3129	4437	0	0	0	0
1	9	17	""	"iYLR327C"	3390	27880	90	1232	1838	1507	91	95	44	100	100	0	3717	5442	4364	74	82	47	100	100	0	0	0	0	0	0	0	0	0	0	0	0	0	0	0	0	0	0	0	0.313	0.325	0.307	0.320	1.510	0.326	0.936	0.000	0.000	0.000	0.000	0.000	0.000	0.000	0.000	0.000	0.000	0.000	0.000	0.000	0.000	52	420	4784	7115	-1.675	Error	Error	1141	3643	0	0	1747	5368	0	0	0	0
1	10	17	""	"iYLR338W"	3570	27880	70	514	813	621	91	93	40	96	93	0	1197	2012	1658	75	84	39	100	100	0	0	0	0	0	0	0	0	0	0	0	0	0	0	0	0	0	0	0	0.377	0.373	0.379	0.351	2.094	0.348	0.864	0.000	0.000	0.000	0.000	0.000	0.000	0.000	0.000	0.000	0.000	0.000	0.000	0.000	0.000	32	236	1545	2659	-1.407	Error	Error	423	1122	0	0	722	1937	0	0	0	0
1	11	17	""	"iYLR343W"	3770	27870	90	946	1962	2132	86	92	41	98	98	0	1090	2299	2170	74	78	26	100	98	0	0	0	0	0	0	0	0	0	0	0	0	0	0	0	0	0	0	0	0.846	0.843	0.687	0.728	2.316	0.917	0.875	0.000	0.000	0.000	0.000	0.000	0.000	0.000	0.000	0.000	0.000	0.000	0.000	0.000	0.000	52	420	1876	4101	-0.240	Error	Error	860	1016	0	0	1876	2225	0	0	0	0
1	12	17	""	"iYLR345W"	3990	27880	90	979	1391	1111	86	94	45	100	100	0	1046	1212	804	73	78	26	100	100	0	0	0	0	0	0	0	0	0	0	0	0	0	0	0	0	0	0	0	0.918	1.146	1.077	1.013	1.594	1.283	0.875	0.000	0.000	0.000	0.000	0.000	0.000	0.000	0.000	0.000	0.000	0.000	0.000	0.000	0.000	52	414	1866	2444	-0.124	Error	Error	893	973	0	0	1305	1139	0	0	0	0
1	13	17	""	"iYMR044W"	4170	27880	80	123	182	223	90	93	39	46	30	0	74	143	188	72	79	28	36	30	0	0	0	0	0	0	0	0	0	0	0	0	0	0	0	0	0	0	0	16.500	1.296	1.132	1.756	3.203	1.205	0.672	0.000	0.000	0.000	0.000	0.000	0.000	0.000	0.000	0.000	0.000	0.000	0.000	0.000	0.000	52	340	35	163	4.044	Error	Error	33	2	0	0	92	71	0	0	0	0
1	14	17	""	"iYMR048W"	4380	27880	70	2652	2790	1463	91	94	42	100	100	0	3397	3111	1550	73	82	35	100	100	0	0	0	0	0	0	0	0	0	0	0	0	0	0	0	0	0	0	0	0.770	0.888	0.839	0.864	1.399	0.885	0.899	0.000	0.000	0.000	0.000	0.000	0.000	0.000	0.000	0.000	0.000	0.000	0.000	0.000	0.000	32	236	5885	5737	-0.376	Error	Error	2561	3324	0	0	2699	3038	0	0	0	0
1	15	17	""	"iYMRCdelta10"	4590	27880	70	389	508	312	88	101	70	93	87	0	585	694	366	75	88	145	96	84	0	0	0	0	0	0	0	0	0	0	0	0	0	0	0	0	0	0	0	0.590	0.679	0.648	0.568	2.247	0.607	0.630	0.000	0.000	0.000	0.000	0.000	0.000	0.000	0.000	0.000	0.000	0.000	0.000	0.000	0.000	32	236	811	1039	-0.761	Error	Error	301	510	0	0	420	619	0	0	0	0
1	16	17	""	"iYMR067C"	4780	27870	80	1506	2339	2194	90	94	37	100	98	0	3131	3626	2978	74	79	29	98	98	0	0	0	0	0	0	0	0	0	0	0	0	0	0	0	0	0	0	0	0.463	0.633	0.532	0.606	1.960	0.677	0.936	0.000	0.000	0.000	0.000	0.000	0.000	0.000	0.000	0.000	0.000	0.000	0.000	0.000	0.000	52	340	4473	5801	-1.110	Error	Error	1416	3057	0	0	2249	3552	0	0	0	0
1	17	17	""	"iYMR071C"	4980	27890	80	1139	1483	1196	91	97	45	98	98	0	1401	1791	1243	73	82	82	100	96	0	0	0	0	0	0	0	0	0	0	0	0	0	0	0	0	0	0	0	0.789	0.810	0.736	0.682	1.978	0.871	0.904	0.000	0.000	0.000	0.000	0.000	0.000	0.000	0.000	0.000	0.000	0.000	0.000	0.000	0.000	52	340	2376	3110	-0.342	Error	Error	1048	1328	0	0	1392	1718	0	0	0	0
1	18	17	""	"iYMR075C-A"	5190	27870	70	2467	2844	1964	102	104	43	100	96	0	1502	1596	1005	76	83	33	100	100	0	0	0	0	0	0	0	0	0	0	0	0	0	0	0	0	0	0	0	1.658	1.804	1.627	1.551	1.886	1.922	0.916	0.000	0.000	0.000	0.000	0.000	0.000	0.000	0.000	0.000	0.000	0.000	0.000	0.000	0.000	32	236	3791	4262	0.730	Error	Error	2365	1426	0	0	2742	1520	0	0	0	0
1	19	17	""	"iYMR090W"	5380	27870	70	1151	1199	730	94	101	44	100	100	0	1501	1779	1070	75	81	37	100	100	0	0	0	0	0	0	0	0	0	0	0	0	0	0	0	0	0	0	0	0.741	0.648	0.643	0.591	1.754	0.631	0.826	0.000	0.000	0.000	0.000	0.000	0.000	0.000	0.000	0.000	0.000	0.000	0.000	0.000	0.000	32	236	2483	2809	-0.432	Error	Error	1057	1426	0	0	1105	1704	0	0	0	0
1	20	17	""	"iYMR095C"	5590	27870	70	2524	2556	1547	90	96	39	100	100	0	2723	2465	1468	74	80	30	100	100	0	0	0	0	0	0	0	0	0	0	0	0	0	0	0	0	0	0	0	0.919	1.031	0.976	0.967	1.578	1.042	0.917	0.000	0.000	0.000	0.000	0.000	0.000	0.000	0.000	0.000	0.000	0.000	0.000	0.000	0.000	32	236	5083	4857	-0.122	Error	Error	2434	2649	0	0	2466	2391	0	0	0	0
1	21	17	""	"iYMRCdelta13"	5770	27870	60	172	212	115	86	94	42	84	50	0	285	326	198	82	88	35	90	84	0	0	0	0	0	0	0	0	0	0	0	0	0	0	0	0	0	0	0	0.424	0.516	0.461	0.475	2.488	0.452	0.482	0.000	0.000	0.000	0.000	0.000	0.000	0.000	0.000	0.000	0.000	0.000	0.000	0.000	0.000	32	176	289	370	-1.239	Error	Error	86	203	0	0	126	244	0	0	0	0
1	1	18	""	"iYMR111C"	1790	28090	90	1412	2497	2116	86	93	46	100	100	0	4379	4866	3709	74	79	31	100	100	0	0	0	0	0	0	0	0	0	0	0	0	0	0	0	0	0	0	0	0.308	0.503	0.512	0.476	1.404	0.526	0.943	0.000	0.000	0.000	0.000	0.000	0.000	0.000	0.000	0.000	0.000	0.000	0.000	0.000	0.000	52	420	5631	7203	-1.699	Error	Error	1326	4305	0	0	2411	4792	0	0	0	0
1	2	18	""	"iYMR115W"	1980	28090	70	157	163	63	86	93	44	68	34	0	234	241	104	69	73	25	96	84	0	0	0	0	0	0	0	0	0	0	0	0	0	0	0	0	0	0	0	0.430	0.448	0.494	0.409	2.820	0.456	0.238	0.000	0.000	0.000	0.000	0.000	0.000	0.000	0.000	0.000	0.000	0.000	0.000	0.000	0.000	32	236	236	249	-1.217	Error	Error	71	165	0	0	77	172	0	0	0	0
1	3	18	""	"iYMRWdelta16"	2180	28090	90	754	875	584	87	93	40	98	96	0	1229	1431	909	70	80	36	100	100	0	0	0	0	0	0	0	0	0	0	0	0	0	0	0	0	0	0	0	0.575	0.579	0.542	0.545	1.835	0.572	0.805	0.000	0.000	0.000	0.000	0.000	0.000	0.000	0.000	0.000	0.000	0.000	0.000	0.000	0.000	52	420	1826	2149	-0.797	Error	Error	667	1159	0	0	788	1361	0	0	0	0
1	4	18	""	"iYNL258C"	2380	28090	80	1808	1723	1030	88	94	41	100	98	0	2809	2908	1428	76	83	36	100	100	0	0	0	0	0	0	0	0	0	0	0	0	0	0	0	0	0	0	0	0.629	0.577	0.539	0.498	1.618	0.597	0.902	0.000	0.000	0.000	0.000	0.000	0.000	0.000	0.000	0.000	0.000	0.000	0.000	0.000	0.000	52	340	4453	4467	-0.668	Error	Error	1720	2733	0	0	1635	2832	0	0	0	0
1	5	18	""	"iYNL254C"	2580	28090	80	2650	3559	2826	84	91	42	100	100	0	5650	6769	4988	76	82	30	100	100	0	0	0	0	0	0	0	0	0	0	0	0	0	0	0	0	0	0	0	0.460	0.519	0.493	0.489	1.549	0.532	0.946	0.000	0.000	0.000	0.000	0.000	0.000	0.000	0.000	0.000	0.000	0.000	0.000	0.000	0.000	52	340	8140	10168	-1.119	Error	Error	2566	5574	0	0	3475	6693	0	0	0	0
1	6	18	""	"iYNL249C"	2770	28100	60	1507	1350	844	90	93	41	96	96	0	2440	2335	1260	79	88	45	100	100	0	0	0	0	0	0	0	0	0	0	0	0	0	0	0	0	0	0	0	0.600	0.559	0.539	0.517	1.534	0.581	0.913	0.000	0.000	0.000	0.000	0.000	0.000	0.000	0.000	0.000	0.000	0.000	0.000	0.000	0.000	32	176	3778	3516	-0.737	Error	Error	1417	2361	0	0	1260	2256	0	0	0	0
1	7	18	""	"iYNL231C"	2970	28070	60	685	893	615	83	88	41	96	93	0	1100	1186	841	88	96	47	96	93	0	0	0	0	0	0	0	0	0	0	0	0	0	0	0	0	0	0	0	0.595	0.738	0.758	0.841	2.032	0.701	0.833	0.000	0.000	0.000	0.000	0.000	0.000	0.000	0.000	0.000	0.000	0.000	0.000	0.000	0.000	32	176	1614	1908	-0.749	Error	Error	602	1012	0	0	810	1098	0	0	0	0
1	8	18	""	"iYNL225C"	3190	28090	100	371	655	733	91	96	44	92	86	0	544	1202	1390	81	88	33	97	96	0	0	0	0	0	0	0	0	0	0	0	0	0	0	0	0	0	0	0	0.605	0.503	0.503	0.472	2.486	0.492	0.830	0.000	0.000	0.000	0.000	0.000	0.000	0.000	0.000	0.000	0.000	0.000	0.000	0.000	0.000	80	540	743	1685	-0.726	Error	Error	280	463	0	0	564	1121	0	0	0	0
1	9	18	""	"iYNL221C"	3380	28090	80	1714	2920	2706	89	94	40	100	100	0	4290	5704	4752	75	82	32	100	100	0	0	0	0	0	0	0	0	0	0	0	0	0	0	0	0	0	0	0	0.386	0.503	0.452	0.435	1.581	0.529	0.947	0.000	0.000	0.000	0.000	0.000	0.000	0.000	0.000	0.000	0.000	0.000	0.000	0.000	0.000	52	340	5840	8460	-1.375	Error	Error	1625	4215	0	0	2831	5629	0	0	0	0
1	10	18	""	"iYNL202W"	3580	28090	90	277	395	361	83	92	42	82	69	0	416	570	458	72	78	45	98	94	0	0	0	0	0	0	0	0	0	0	0	0	0	0	0	0	0	0	0	0.564	0.627	0.628	0.496	2.672	0.699	0.819	0.000	0.000	0.000	0.000	0.000	0.000	0.000	0.000	0.000	0.000	0.000	0.000	0.000	0.000	52	420	538	810	-0.826	Error	Error	194	344	0	0	312	498	0	0	0	0
1	11	18	""	"iYNL197C"	3780	28080	90	1204	2007	2012	90	96	44	100	100	0	1808	3859	3805	74	80	35	100	100	0	0	0	0	0	0	0	0	0	0	0	0	0	0	0	0	0	0	0	0.642	0.506	0.482	0.444	1.677	0.509	0.939	0.000	0.000	0.000	0.000	0.000	0.000	0.000	0.000	0.000	0.000	0.000	0.000	0.000	0.000	52	420	2848	5702	-0.638	Error	Error	1114	1734	0	0	1917	3785	0	0	0	0
1	12	18	""	"iYNL193W"	3970	28080	90	1466	1453	1016	86	92	44	96	96	0	3315	3920	2885	89	105	61	98	96	0	0	0	0	0	0	0	0	0	0	0	0	0	0	0	0	0	0	0	0.428	0.357	0.383	0.385	2.315	0.329	0.838	0.000	0.000	0.000	0.000	0.000	0.000	0.000	0.000	0.000	0.000	0.000	0.000	0.000	0.000	52	420	4606	5198	-1.225	Error	Error	1380	3226	0	0	1367	3831	0	0	0	0
1	13	18	""	"iYNL176C"	4200	28080	80	1415	2454	2339	84	93	65	100	98	0	4275	6633	5084	88	97	38	100	100	0	0	0	0	0	0	0	0	0	0	0	0	0	0	0	0	0	0	0	0.318	0.362	0.316	0.298	1.587	0.397	0.903	0.000	0.000	0.000	0.000	0.000	0.000	0.000	0.000	0.000	0.000	0.000	0.000	0.000	0.000	52	334	5518	8915	-1.653	Error	Error	1331	4187	0	0	2370	6545	0	0	0	0
1	14	18	""	"iYNL168C"	4370	28080	90	1342	2629	2493	88	101	85	100	100	0	2931	4179	3579	78	106	172	100	96	0	0	0	0	0	0	0	0	0	0	0	0	0	0	0	0	0	0	0	0.440	0.620	0.587	0.587	1.678	0.639	0.931	0.000	0.000	0.000	0.000	0.000	0.000	0.000	0.000	0.000	0.000	0.000	0.000	0.000	0.000	52	406	4107	6642	-1.186	Error	Error	1254	2853	0	0	2541	4101	0	0	0	0
1	15	18	""	"iYNL164C"	4580	28080	100	450	929	1141	92	101	76	92	85	0	722	1526	1789	73	95	147	95	85	0	0	0	0	0	0	0	0	0	0	0	0	0	0	0	0	0	0	0	0.552	0.576	0.532	0.529	2.018	0.596	0.852	0.000	0.000	0.000	0.000	0.000	0.000	0.000	0.000	0.000	0.000	0.000	0.000	0.000	0.000	80	532	1007	2290	-0.858	Error	Error	358	649	0	0	837	1453	0	0	0	0
1	16	18	""	"iYOL113W"	4760	28070	90	2134	1976	844	91	99	63	100	100	0	2900	2887	1071	74	92	133	100	100	0	0	0	0	0	0	0	0	0	0	0	0	0	0	0	0	0	0	0	0.723	0.670	0.658	0.646	1.488	0.656	0.862	0.000	0.000	0.000	0.000	0.000	0.000	0.000	0.000	0.000	0.000	0.000	0.000	0.000	0.000	52	407	4869	4698	-0.468	Error	Error	2043	2826	0	0	1885	2813	0	0	0	0
1	17	18	""	"iYOL109W"	4980	28070	70	294	366	220	89	93	39	93	81	0	330	427	238	73	78	25	100	100	0	0	0	0	0	0	0	0	0	0	0	0	0	0	0	0	0	0	0	0.798	0.782	0.704	0.643	2.190	0.841	0.813	0.000	0.000	0.000	0.000	0.000	0.000	0.000	0.000	0.000	0.000	0.000	0.000	0.000	0.000	32	236	462	631	-0.326	Error	Error	205	257	0	0	277	354	0	0	0	0
1	18	18	""	"iYOLCdelta3"	5180	28080	70	587	877	724	88	92	41	93	90	0	639	968	796	73	78	24	100	100	0	0	0	0	0	0	0	0	0	0	0	0	0	0	0	0	0	0	0	0.882	0.882	0.759	0.773	1.710	0.875	0.847	0.000	0.000	0.000	0.000	0.000	0.000	0.000	0.000	0.000	0.000	0.000	0.000	0.000	0.000	32	236	1065	1684	-0.182	Error	Error	499	566	0	0	789	895	0	0	0	0
1	19	18	""	"iYOL092W"	5370	28070	60	328	583	470	89	96	44	90	78	0	537	929	768	80	91	41	100	96	0	0	0	0	0	0	0	0	0	0	0	0	0	0	0	0	0	0	0	0.523	0.582	0.514	0.505	2.055	0.569	0.875	0.000	0.000	0.000	0.000	0.000	0.000	0.000	0.000	0.000	0.000	0.000	0.000	0.000	0.000	32	176	696	1343	-0.935	Error	Error	239	457	0	0	494	849	0	0	0	0
1	20	18	""	"iYOL088C"	5570	28070	70	586	1068	925	91	102	51	93	87	0	1023	1618	1368	82	99	63	100	100	0	0	0	0	0	0	0	0	0	0	0	0	0	0	0	0	0	0	0	0.526	0.636	0.594	0.570	1.715	0.609	0.896	0.000	0.000	0.000	0.000	0.000	0.000	0.000	0.000	0.000	0.000	0.000	0.000	0.000	0.000	32	236	1436	2513	-0.927	Error	Error	495	941	0	0	977	1536	0	0	0	0
1	21	18	""	"iYOL084W"	5770	28070	90	668	875	695	93	94	39	100	98	0	1457	1929	1409	76	81	31	100	100	0	0	0	0	0	0	0	0	0	0	0	0	0	0	0	0	0	0	0	0.416	0.422	0.409	0.384	1.899	0.437	0.898	0.000	0.000	0.000	0.000	0.000	0.000	0.000	0.000	0.000	0.000	0.000	0.000	0.000	0.000	52	420	1956	2635	-1.264	Error	Error	575	1381	0	0	782	1853	0	0	0	0
1	1	19	""	"iYOL067C"	1790	28290	90	1578	1650	629	87	94	39	100	100	0	3805	3666	1333	68	74	31	100	100	0	0	0	0	0	0	0	0	0	0	0	0	0	0	0	0	0	0	0	0.399	0.434	0.436	0.432	1.269	0.419	0.925	0.000	0.000	0.000	0.000	0.000	0.000	0.000	0.000	0.000	0.000	0.000	0.000	0.000	0.000	52	420	5228	5161	-1.326	Error	Error	1491	3737	0	0	1563	3598	0	0	0	0
1	2	19	""	"iYOL063C"	1980	28290	80	806	1176	950	86	93	42	100	96	0	2216	3344	2692	68	75	36	100	100	0	0	0	0	0	0	0	0	0	0	0	0	0	0	0	0	0	0	0	0.335	0.333	0.337	0.311	1.501	0.331	0.931	0.000	0.000	0.000	0.000	0.000	0.000	0.000	0.000	0.000	0.000	0.000	0.000	0.000	0.000	52	340	2868	4366	-1.577	Error	Error	720	2148	0	0	1090	3276	0	0	0	0
1	3	19	""	"iYOL059W"	2190	28290	80	1100	1602	1284	86	92	40	98	98	0	4404	5774	4486	70	78	45	100	100	0	0	0	0	0	0	0	0	0	0	0	0	0	0	0	0	0	0	0	0.234	0.266	0.249	0.247	1.595	0.269	0.948	0.000	0.000	0.000	0.000	0.000	0.000	0.000	0.000	0.000	0.000	0.000	0.000	0.000	0.000	52	340	5348	7220	-2.096	Error	Error	1014	4334	0	0	1516	5704	0	0	0	0
1	4	19	""	"iYOL045W"	2380	28290	90	4298	3921	1965	90	99	75	100	100	0	4044	3757	1653	73	87	118	100	100	0	0	0	0	0	0	0	0	0	0	0	0	0	0	0	0	0	0	0	1.060	1.040	1.022	1.001	1.329	1.044	0.914	0.000	0.000	0.000	0.000	0.000	0.000	0.000	0.000	0.000	0.000	0.000	0.000	0.000	0.000	52	420	8179	7515	0.084	Error	Error	4208	3971	0	0	3831	3684	0	0	0	0
1	5	19	""	"iYOL041C"	2580	28290	90	770	1442	1367	86	91	40	98	98	0	1305	2321	2005	73	79	31	98	96	0	0	0	0	0	0	0	0	0	0	0	0	0	0	0	0	0	0	0	0.555	0.603	0.596	0.566	1.640	0.633	0.935	0.000	0.000	0.000	0.000	0.000	0.000	0.000	0.000	0.000	0.000	0.000	0.000	0.000	0.000	52	420	1916	3604	-0.849	Error	Error	684	1232	0	0	1356	2248	0	0	0	0
1	6	19	""	"iYOL035C"	2780	28290	80	804	1372	1276	88	94	43	100	100	0	1923	3350	2921	74	80	32	100	100	0	0	0	0	0	0	0	0	0	0	0	0	0	0	0	0	0	0	0	0.387	0.392	0.355	0.349	1.637	0.404	0.921	0.000	0.000	0.000	0.000	0.000	0.000	0.000	0.000	0.000	0.000	0.000	0.000	0.000	0.000	52	340	2565	4560	-1.369	Error	Error	716	1849	0	0	1284	3276	0	0	0	0
1	7	19	""	"iYOR260W"	2990	28290	90	603	716	422	88	94	42	98	98	0	806	997	522	75	83	37	100	100	0	0	0	0	0	0	0	0	0	0	0	0	0	0	0	0	0	0	0	0.705	0.681	0.656	0.611	1.779	0.714	0.817	0.000	0.000	0.000	0.000	0.000	0.000	0.000	0.000	0.000	0.000	0.000	0.000	0.000	0.000	52	420	1246	1550	-0.505	Error	Error	515	731	0	0	628	922	0	0	0	0
1	8	19	""	"iYOR265W"	3180	28290	90	2287	3525	2682	89	95	41	100	100	0	2453	3592	2423	75	80	29	100	100	0	0	0	0	0	0	0	0	0	0	0	0	0	0	0	0	0	0	0	0.924	0.977	0.954	0.890	1.495	1.028	0.927	0.000	0.000	0.000	0.000	0.000	0.000	0.000	0.000	0.000	0.000	0.000	0.000	0.000	0.000	52	420	4576	6953	-0.114	Error	Error	2198	2378	0	0	3436	3517	0	0	0	0
1	9	19	""	"iYOR269W"	3370	28290	80	753	1499	1420	94	97	42	98	98	0	926	1523	1330	75	81	33	100	100	0	0	0	0	0	0	0	0	0	0	0	0	0	0	0	0	0	0	0	0.774	0.970	0.955	0.869	1.684	1.024	0.908	0.000	0.000	0.000	0.000	0.000	0.000	0.000	0.000	0.000	0.000	0.000	0.000	0.000	0.000	52	340	1510	2853	-0.369	Error	Error	659	851	0	0	1405	1448	0	0	0	0
1	10	19	""	"iYOR287C"	3580	28290	80	1313	2161	1864	89	94	40	98	96	0	1496	2786	2419	70	75	26	98	96	0	0	0	0	0	0	0	0	0	0	0	0	0	0	0	0	0	0	0	0.858	0.763	0.778	0.790	1.993	0.764	0.957	0.000	0.000	0.000	0.000	0.000	0.000	0.000	0.000	0.000	0.000	0.000	0.000	0.000	0.000	52	340	2650	4788	-0.220	Error	Error	1224	1426	0	0	2072	2716	0	0	0	0
1	11	19	""	"iYOR290C"	3790	28280	90	1264	1651	1396	91	97	42	100	96	0	2366	3744	2942	73	78	28	100	100	0	0	0	0	0	0	0	0	0	0	0	0	0	0	0	0	0	0	0	0.512	0.425	0.403	0.353	1.747	0.437	0.923	0.000	0.000	0.000	0.000	0.000	0.000	0.000	0.000	0.000	0.000	0.000	0.000	0.000	0.000	52	420	3466	5231	-0.967	Error	Error	1173	2293	0	0	1560	3671	0	0	0	0
1	12	19	""	"iYOR294W"	4000	28280	70	667	1200	1297	94	105	72	78	75	0	1116	2114	2226	101	136	133	78	71	0	0	0	0	0	0	0	0	0	0	0	0	0	0	0	0	0	0	0	0.565	0.549	0.498	0.614	3.302	0.560	0.863	0.000	0.000	0.000	0.000	0.000	0.000	0.000	0.000	0.000	0.000	0.000	0.000	0.000	0.000	32	236	1588	3119	-0.825	Error	Error	573	1015	0	0	1106	2013	0	0	0	0
1	13	19	""	"iYOR311C"	4190	28290	60	793	920	865	76	85	39	87	84	0	1011	2102	2038	117	119	32	93	93	0	0	0	0	0	0	0	0	0	0	0	0	0	0	0	0	0	0	0	0.802	0.425	0.424	0.403	1.982	0.403	0.881	0.000	0.000	0.000	0.000	0.000	0.000	0.000	0.000	0.000	0.000	0.000	0.000	0.000	0.000	32	176	1611	2829	-0.318	Error	Error	717	894	0	0	844	1985	0	0	0	0
1	14	19	""	"iYOR315W"	4420	28280	70	278	679	902	89	102	58	81	78	0	427	703	767	86	108	136	81	65	0	0	0	0	0	0	0	0	0	0	0	0	0	0	0	0	0	0	0	0.554	0.956	0.657	0.737	3.677	1.115	0.739	0.000	0.000	0.000	0.000	0.000	0.000	0.000	0.000	0.000	0.000	0.000	0.000	0.000	0.000	32	230	530	1207	-0.851	Error	Error	189	341	0	0	590	617	0	0	0	0
1	15	19	""	"iYOR318C"	4570	28280	90	2197	2992	2296	93	124	221	100	88	0	3330	4210	2518	79	137	331	100	100	0	0	0	0	0	0	0	0	0	0	0	0	0	0	0	0	0	0	0	0.647	0.702	0.661	0.577	1.671	0.749	0.914	0.000	0.000	0.000	0.000	0.000	0.000	0.000	0.000	0.000	0.000	0.000	0.000	0.000	0.000	52	400	5355	7030	-0.628	Error	Error	2104	3251	0	0	2899	4131	0	0	0	0
1	16	19	""	"iYOR337W"	4780	28280	80	666	883	589	92	98	43	100	100	0	1391	1811	1133	75	81	38	100	100	0	0	0	0	0	0	0	0	0	0	0	0	0	0	0	0	0	0	0	0.436	0.456	0.418	0.403	1.549	0.466	0.897	0.000	0.000	0.000	0.000	0.000	0.000	0.000	0.000	0.000	0.000	0.000	0.000	0.000	0.000	52	340	1890	2527	-1.197	Error	Error	574	1316	0	0	791	1736	0	0	0	0
1	17	19	""	"iYOR341W"	4980	28280	80	618	1686	1908	89	95	41	96	88	0	718	1723	1899	75	82	40	100	98	0	0	0	0	0	0	0	0	0	0	0	0	0	0	0	0	0	0	0	0.823	0.969	0.939	0.813	1.938	0.993	0.924	0.000	0.000	0.000	0.000	0.000	0.000	0.000	0.000	0.000	0.000	0.000	0.000	0.000	0.000	52	340	1172	3245	-0.282	Error	Error	529	643	0	0	1597	1648	0	0	0	0
1	18	19	""	"iYORWdelta24"	5170	28280	70	2264	2520	1872	88	100	62	96	96	0	1644	2042	1425	76	94	82	100	100	0	0	0	0	0	0	0	0	0	0	0	0	0	0	0	0	0	0	0	1.388	1.237	1.137	1.046	1.975	1.248	0.929	0.000	0.000	0.000	0.000	0.000	0.000	0.000	0.000	0.000	0.000	0.000	0.000	0.000	0.000	32	236	3744	4398	0.473	Error	Error	2176	1568	0	0	2432	1966	0	0	0	0
1	19	19	""	"iYPL030W"	5370	28280	70	1575	2014	1572	96	106	73	96	96	0	2688	3445	2586	74	101	140	100	100	0	0	0	0	0	0	0	0	0	0	0	0	0	0	0	0	0	0	0	0.566	0.569	0.527	0.521	1.666	0.564	0.928	0.000	0.000	0.000	0.000	0.000	0.000	0.000	0.000	0.000	0.000	0.000	0.000	0.000	0.000	32	236	4093	5289	-0.822	Error	Error	1479	2614	0	0	1918	3371	0	0	0	0
1	20	19	""	"iYPL026C"	5590	28270	70	747	1137	964	86	92	41	96	90	0	1819	2580	1907	82	92	79	100	100	0	0	0	0	0	0	0	0	0	0	0	0	0	0	0	0	0	0	0	0.381	0.421	0.386	0.341	1.752	0.451	0.922	0.000	0.000	0.000	0.000	0.000	0.000	0.000	0.000	0.000	0.000	0.000	0.000	0.000	0.000	32	236	2398	3549	-1.394	Error	Error	661	1737	0	0	1051	2498	0	0	0	0
1	21	19	""	"iYPL022W"	5800	28270	70	2356	4786	5250	100	120	118	100	100	0	1663	2941	2774	74	96	104	100	96	0	0	0	0	0	0	0	0	0	0	0	0	0	0	0	0	0	0	0	1.420	1.634	1.395	1.468	1.547	1.869	0.906	0.000	0.000	0.000	0.000	0.000	0.000	0.000	0.000	0.000	0.000	0.000	0.000	0.000	0.000	32	220	3845	7553	0.506	Error	Error	2256	1589	0	0	4686	2867	0	0	0	0
1	1	20	""	"iYPL005W"	1790	28490	80	1402	3517	3947	90	95	42	100	100	0	654	1083	955	70	78	37	96	96	0	0	0	0	0	0	0	0	0	0	0	0	0	0	0	0	0	0	0	2.247	3.383	2.866	2.586	2.108	4.023	0.887	0.000	0.000	0.000	0.000	0.000	0.000	0.000	0.000	0.000	0.000	0.000	0.000	0.000	0.000	52	340	1896	4440	1.168	Error	Error	1312	584	0	0	3427	1013	0	0	0	0
1	2	20	""	"iYPL001W"	1980	28490	70	355	523	404	96	113	158	65	40	0	327	371	170	69	100	214	62	18	0	0	0	0	0	0	0	0	0	0	0	0	0	0	0	0	0	0	0	1.004	1.414	1.369	0.983	3.547	1.061	0.235	0.000	0.000	0.000	0.000	0.000	0.000	0.000	0.000	0.000	0.000	0.000	0.000	0.000	0.000	32	236	517	729	0.006	Error	Error	259	258	0	0	427	302	0	0	0	0
1	3	20	""	"itF(GAA)P1"	2200	28480	70	1228	2452	2424	89	102	63	96	93	0	1407	1757	1650	70	79	48	96	96	0	0	0	0	0	0	0	0	0	0	0	0	0	0	0	0	0	0	0	0.852	1.401	1.233	1.240	1.553	1.504	0.895	0.000	0.000	0.000	0.000	0.000	0.000	0.000	0.000	0.000	0.000	0.000	0.000	0.000	0.000	32	236	2476	4050	-0.231	Error	Error	1139	1337	0	0	2363	1687	0	0	0	0
1	4	20	""	"iYPR013C-1"	2390	28490	100	543	1688	2261	89	94	40	90	87	0	1147	3398	4350	68	74	29	95	93	0	0	0	0	0	0	0	0	0	0	0	0	0	0	0	0	0	0	0	0.421	0.480	0.432	0.505	2.377	0.501	0.955	0.000	0.000	0.000	0.000	0.000	0.000	0.000	0.000	0.000	0.000	0.000	0.000	0.000	0.000	80	546	1533	4929	-1.249	Error	Error	454	1079	0	0	1599	3330	0	0	0	0
1	5	20	""	"iYPR016C"	2580	28490	60	267	294	136	92	99	47	93	75	0	511	517	234	74	82	51	96	93	0	0	0	0	0	0	0	0	0	0	0	0	0	0	0	0	0	0	0	0.400	0.456	0.447	0.462	1.840	0.433	0.610	0.000	0.000	0.000	0.000	0.000	0.000	0.000	0.000	0.000	0.000	0.000	0.000	0.000	0.000	32	176	612	645	-1.320	Error	Error	175	437	0	0	202	443	0	0	0	0
1	6	20	""	"iYPR020W"	2790	28490	80	666	1691	1987	84	90	41	100	94	0	503	1016	989	73	80	35	98	96	0	0	0	0	0	0	0	0	0	0	0	0	0	0	0	0	0	0	0	1.353	1.704	1.382	1.334	2.103	1.959	0.891	0.000	0.000	0.000	0.000	0.000	0.000	0.000	0.000	0.000	0.000	0.000	0.000	0.000	0.000	52	340	1012	2550	0.437	Error	Error	582	430	0	0	1607	943	0	0	0	0
1	7	20	""	"iYPR035W"	2980	28490	80	235	293	173	90	95	55	84	65	0	457	616	421	72	92	277	76	30	0	0	0	0	0	0	0	0	0	0	0	0	0	0	0	0	0	0	0	0.377	0.373	0.405	0.324	2.597	0.341	0.653	0.000	0.000	0.000	0.000	0.000	0.000	0.000	0.000	0.000	0.000	0.000	0.000	0.000	0.000	52	340	530	747	-1.409	Error	Error	145	385	0	0	203	544	0	0	0	0
1	8	20	""	"iYPR042C"	3180	28490	80	3606	3289	2000	89	94	39	100	100	0	5446	5787	3611	72	77	28	100	100	0	0	0	0	0	0	0	0	0	0	0	0	0	0	0	0	0	0	0	0.654	0.560	0.564	0.554	1.457	0.530	0.934	0.000	0.000	0.000	0.000	0.000	0.000	0.000	0.000	0.000	0.000	0.000	0.000	0.000	0.000	52	340	8891	8915	-0.612	Error	Error	3517	5374	0	0	3200	5715	0	0	0	0
1	9	20	""	"iYPR047W"	3390	28490	80	1512	1746	1124	90	95	43	98	98	0	2974	3456	2021	73	77	26	98	98	0	0	0	0	0	0	0	0	0	0	0	0	0	0	0	0	0	0	0	0.490	0.490	0.474	0.468	1.431	0.507	0.928	0.000	0.000	0.000	0.000	0.000	0.000	0.000	0.000	0.000	0.000	0.000	0.000	0.000	0.000	52	340	4323	5039	-1.029	Error	Error	1422	2901	0	0	1656	3383	0	0	0	0
1	10	20	""	"iYCL001W-A"	3590	28490	70	17103	16845	9519	94	115	148	100	100	0	3847	3595	1788	75	83	43	100	100	0	0	0	0	0	0	0	0	0	0	0	0	0	0	0	0	0	0	0	4.509	4.759	4.600	4.581	1.359	5.083	0.940	0.000	0.000	0.000	0.000	0.000	0.000	0.000	0.000	0.000	0.000	0.000	0.000	0.000	0.000	32	236	20781	20271	2.173	Error	Error	17009	3772	0	0	16751	3520	0	0	0	0
1	11	20	""	"iYCL007C"	3780	28490	70	1036	1122	901	96	99	42	93	87	0	597	812	518	70	77	39	100	100	0	0	0	0	0	0	0	0	0	0	0	0	0	0	0	0	0	0	0	1.784	1.383	1.375	0.966	2.413	1.557	0.900	0.000	0.000	0.000	0.000	0.000	0.000	0.000	0.000	0.000	0.000	0.000	0.000	0.000	0.000	32	236	1467	1768	0.835	Error	Error	940	527	0	0	1026	742	0	0	0	0
1	12	20	""	"iYCL012W"	3980	28480	70	6534	9072	8601	91	101	55	100	100	0	1301	2455	1999	76	86	39	100	100	0	0	0	0	0	0	0	0	0	0	0	0	0	0	0	0	0	0	0	5.260	3.775	3.491	2.968	1.872	4.192	0.913	0.000	0.000	0.000	0.000	0.000	0.000	0.000	0.000	0.000	0.000	0.000	0.000	0.000	0.000	32	236	7668	11360	2.395	Error	Error	6443	1225	0	0	8981	2379	0	0	0	0
1	13	20	""	"iYCR011C"	4180	28490	60	425	488	320	86	97	68	96	75	0	589	787	577	77	85	36	100	100	0	0	0	0	0	0	0	0	0	0	0	0	0	0	0	0	0	0	0	0.662	0.566	0.529	0.554	1.613	0.518	0.790	0.000	0.000	0.000	0.000	0.000	0.000	0.000	0.000	0.000	0.000	0.000	0.000	0.000	0.000	32	176	851	1112	-0.595	Error	Error	339	512	0	0	402	710	0	0	0	0
1	14	20	""	"iYCRCdelta6-A"	4370	28480	150	89	100	69	87	95	45	14	6	0	92	110	80	85	94	47	20	8	0	0	0	0	0	0	0	0	0	0	0	0	0	0	0	0	0	0	0	0.286	0.520	1.163	1.165	3.155	1.017	0.160	0.000	0.000	0.000	0.000	0.000	0.000	0.000	0.000	0.000	0.000	0.000	0.000	0.000	0.000	156	1089	9	38	-1.807	Error	Error	2	7	0	0	13	25	0	0	-50	0
1	15	20	""	"iYHR210C-A"	4590	28480	80	5940	5986	4067	89	95	39	100	100	0	7248	7057	4481	88	92	33	100	100	0	0	0	0	0	0	0	0	0	0	0	0	0	0	0	0	0	0	0	0.817	0.846	0.847	0.859	1.829	0.864	0.927	0.000	0.000	0.000	0.000	0.000	0.000	0.000	0.000	0.000	0.000	0.000	0.000	0.000	0.000	52	340	13011	12866	-0.291	Error	Error	5851	7160	0	0	5897	6969	0	0	0	0
1	16	20	""	"iYHRCdelta14-C"	4790	28480	80	470	1533	2647	89	96	43	88	84	0	862	1964	2643	79	87	46	96	86	0	0	0	0	0	0	0	0	0	0	0	0	0	0	0	0	0	0	0	0.487	0.766	0.699	0.629	2.636	0.938	0.870	0.000	0.000	0.000	0.000	0.000	0.000	0.000	0.000	0.000	0.000	0.000	0.000	0.000	0.000	52	340	1164	3329	-1.039	Error	Error	381	783	0	0	1444	1885	0	0	0	0
1	17	20	""	"iYHRCdelta16-B"	4980	28480	80	3968	3956	2504	86	91	40	100	100	0	7698	7947	5324	75	80	33	100	100	0	0	0	0	0	0	0	0	0	0	0	0	0	0	0	0	0	0	0	0.509	0.492	0.502	0.524	1.861	0.473	0.930	0.000	0.000	0.000	0.000	0.000	0.000	0.000	0.000	0.000	0.000	0.000	0.000	0.000	0.000	52	340	11505	11742	-0.974	Error	Error	3882	7623	0	0	3870	7872	0	0	0	0
1	18	20	""	"iYLR157C-A"	5190	28470	80	6354	6078	3097	86	93	38	100	100	0	14305	12370	7002	73	78	31	98	98	0	0	0	0	0	0	0	0	0	0	0	0	0	0	0	0	0	0	0	0.440	0.487	0.480	0.580	2.432	0.461	0.917	0.000	0.000	0.000	0.000	0.000	0.000	0.000	0.000	0.000	0.000	0.000	0.000	0.000	0.000	52	340	20500	18289	-1.183	Error	Error	6268	14232	0	0	5992	12297	0	0	0	0
1	19	20	""	"tE(UUC)C"	5380	28480	60	217	246	128	92	101	60	71	53	0	397	348	131	74	79	25	100	100	0	0	0	0	0	0	0	0	0	0	0	0	0	0	0	0	0	0	0	0.387	0.562	0.655	0.462	2.371	0.659	0.529	0.000	0.000	0.000	0.000	0.000	0.000	0.000	0.000	0.000	0.000	0.000	0.000	0.000	0.000	32	176	448	428	-1.370	Error	Error	125	323	0	0	154	274	0	0	0	0
1	20	20	""	"tQ(UUG)L"	5590	28480	70	584	801	607	85	93	44	90	90	0	909	1178	842	74	82	33	100	100	0	0	0	0	0	0	0	0	0	0	0	0	0	0	0	0	0	0	0	0.598	0.649	0.648	0.561	1.787	0.664	0.844	0.000	0.000	0.000	0.000	0.000	0.000	0.000	0.000	0.000	0.000	0.000	0.000	0.000	0.000	32	236	1334	1820	-0.743	Error	Error	499	835	0	0	716	1104	0	0	0	0
1	21	20	""	"YHRCTy1-1B"	5790	28470	90	2908	8314	10190	87	95	43	100	100	0	5072	10950	12445	72	78	31	100	100	0	0	0	0	0	0	0	0	0	0	0	0	0	0	0	0	0	0	0	0.564	0.756	0.783	0.687	2.278	0.782	0.849	0.000	0.000	0.000	0.000	0.000	0.000	0.000	0.000	0.000	0.000	0.000	0.000	0.000	0.000	52	412	7821	19105	-0.826	Error	Error	2821	5000	0	0	8227	10878	0	0	0	0
2	1	1	"VPS8"	"YAL002W"	6290	24600	100	14777	16558	10949	98	101	45	100	100	0	3676	4054	2393	72	78	37	100	100	0	0	0	0	0	0	0	0	0	0	0	0	0	0	0	0	0	0	0	4.073	4.134	4.054	3.850	1.704	4.464	0.908	0.000	0.000	0.000	0.000	0.000	0.000	0.000	0.000	0.000	0.000	0.000	0.000	0.000	0.000	80	526	18283	20442	2.026	Error	Error	14679	3604	0	0	16460	3982	0	0	0	0
2	2	1	"MTW1"	"YAL034W-A"	6480	24600	100	24079	24000	11553	98	104	48	100	100	0	6786	6115	3079	74	82	44	97	97	0	0	0	0	0	0	0	0	0	0	0	0	0	0	0	0	0	0	0	3.573	3.957	4.025	4.294	2.134	4.018	0.928	0.000	0.000	0.000	0.000	0.000	0.000	0.000	0.000	0.000	0.000	0.000	0.000	0.000	0.000	80	519	30693	29943	1.837	Error	Error	23981	6712	0	0	23902	6041	0	0	0	0
2	3	1	""	"YAL065C-A"	6680	24600	90	18238	16378	6248	95	101	45	100	100	0	13925	12085	4592	75	81	36	100	100	0	0	0	0	0	0	0	0	0	0	0	0	0	0	0	0	0	0	0	1.310	1.356	1.348	1.317	1.388	1.331	0.919	0.000	0.000	0.000	0.000	0.000	0.000	0.000	0.000	0.000	0.000	0.000	0.000	0.000	0.000	52	420	31993	28293	0.390	Error	Error	18143	13850	0	0	16283	12010	0	0	0	0
2	4	1	""	"YAL004W"	6880	24600	80	6185	6499	3787	90	94	38	100	100	0	5923	5762	3598	73	81	32	100	98	0	0	0	0	0	0	0	0	0	0	0	0	0	0	0	0	0	0	0	1.042	1.127	1.059	1.268	2.261	1.123	0.804	0.000	0.000	0.000	0.000	0.000	0.000	0.000	0.000	0.000	0.000	0.000	0.000	0.000	0.000	52	332	11945	12098	0.059	Error	Error	6095	5850	0	0	6409	5689	0	0	0	0
2	5	1	"FUN12"	"YAL035W"	7070	24600	80	8004	8712	5811	93	101	56	100	100	0	5031	5716	3852	74	93	214	100	100	0	0	0	0	0	0	0	0	0	0	0	0	0	0	0	0	0	0	0	1.596	1.528	1.373	1.468	1.808	1.524	0.847	0.000	0.000	0.000	0.000	0.000	0.000	0.000	0.000	0.000	0.000	0.000	0.000	0.000	0.000	52	332	12868	14261	0.674	Error	Error	7911	4957	0	0	8619	5642	0	0	0	0
2	6	1	"SEO1"	"YAL067C"	7280	24600	80	1799	2054	1447	90	98	47	100	98	0	2430	3191	2531	77	81	31	100	100	0	0	0	0	0	0	0	0	0	0	0	0	0	0	0	0	0	0	0	0.726	0.631	0.621	0.650	1.668	0.635	0.679	0.000	0.000	0.000	0.000	0.000	0.000	0.000	0.000	0.000	0.000	0.000	0.000	0.000	0.000	52	332	4062	5078	-0.461	Error	Error	1709	2353	0	0	1964	3114	0	0	0	0
2	7	1	"ERP2"	"YAL007C"	7480	24600	100	14017	12414	6758	95	102	46	100	100	0	4600	4330	2191	75	81	32	96	96	0	0	0	0	0	0	0	0	0	0	0	0	0	0	0	0	0	0	0	3.077	2.895	2.817	2.583	2.122	3.092	0.893	0.000	0.000	0.000	0.000	0.000	0.000	0.000	0.000	0.000	0.000	0.000	0.000	0.000	0.000	80	524	18447	16574	1.621	Error	Error	13922	4525	0	0	12319	4255	0	0	0	0
2	8	1	""	"YAL037W"	7670	24590	110	6536	6149	1964	97	99	41	100	100	0	5347	4794	1421	75	81	32	100	100	0	0	0	0	0	0	0	0	0	0	0	0	0	0	0	0	0	0	0	1.221	1.282	1.277	1.229	1.421	1.294	0.921	0.000	0.000	0.000	0.000	0.000	0.000	0.000	0.000	0.000	0.000	0.000	0.000	0.000	0.000	80	588	11711	10771	0.288	Error	Error	6439	5272	0	0	6052	4719	0	0	0	0
2	9	1	""	"YAL069W"	7870	24590	110	65535	60877	12259	99	103	45	100	100	71	48829	45817	9730	75	80	30	100	100	0	0	0	0	0	0	0	0	0	0	0	0	0	0	0	0	0	0	0	1.342	1.329	1.281	1.317	1.292	1.332	0.929	0.000	0.000	0.000	0.000	0.000	0.000	0.000	0.000	0.000	0.000	0.000	0.000	0.000	0.000	80	591	114190	106520	0.425	Error	Error	65436	48754	0	0	60778	45742	0	0	0	0
2	10	1	"SPO7"	"YAL009W"	8070	24590	100	13789	12745	4441	99	104	41	100	100	0	4109	3932	1038	76	84	33	100	100	0	0	0	0	0	0	0	0	0	0	0	0	0	0	0	0	0	0	0	3.394	3.280	3.432	3.058	1.413	3.548	0.917	0.000	0.000	0.000	0.000	0.000	0.000	0.000	0.000	0.000	0.000	0.000	0.000	0.000	0.000	80	504	17723	16502	1.763	Error	Error	13690	4033	0	0	12646	3856	0	0	0	0
2	11	1	"CYC3"	"YAL039C"	8270	24590	100	3619	3484	1431	97	102	42	100	100	0	5148	5001	1685	76	82	32	100	100	0	0	0	0	0	0	0	0	0	0	0	0	0	0	0	0	0	0	0	0.694	0.688	0.688	0.638	1.486	0.711	0.917	0.000	0.000	0.000	0.000	0.000	0.000	0.000	0.000	0.000	0.000	0.000	0.000	0.000	0.000	80	518	8594	8312	-0.526	Error	Error	3522	5072	0	0	3387	4925	0	0	0	0
2	12	1	""	"YAR002W"	8470	24590	100	32542	30661	10891	101	108	45	100	100	0	5537	5435	1548	79	84	30	100	100	0	0	0	0	0	0	0	0	0	0	0	0	0	0	0	0	0	0	0	5.944	5.706	5.737	5.453	1.362	6.005	0.937	0.000	0.000	0.000	0.000	0.000	0.000	0.000	0.000	0.000	0.000	0.000	0.000	0.000	0.000	80	524	37899	35916	2.571	Error	Error	32441	5458	0	0	30560	5356	0	0	0	0
2	13	1	"CNS1"	"YBR155W"	8660	24590	90	8587	8504	4370	94	100	43	100	100	0	4807	5259	2680	79	82	28	100	100	0	0	0	0	0	0	0	0	0	0	0	0	0	0	0	0	0	0	0	1.796	1.624	1.669	1.561	1.563	1.660	0.912	0.000	0.000	0.000	0.000	0.000	0.000	0.000	0.000	0.000	0.000	0.000	0.000	0.000	0.000	52	406	13221	13590	0.845	Error	Error	8493	4728	0	0	8410	5180	0	0	0	0
2	14	1	"PCH2"	"YBR186W"	8850	24590	60	528	1349	1677	92	98	43	87	81	0	502	1522	1843	78	84	25	100	100	0	0	0	0	0	0	0	0	0	0	0	0	0	0	0	0	0	0	0	1.028	0.870	0.913	0.848	2.090	0.894	0.858	0.000	0.000	0.000	0.000	0.000	0.000	0.000	0.000	0.000	0.000	0.000	0.000	0.000	0.000	32	170	860	2701	0.040	Error	Error	436	424	0	0	1257	1444	0	0	0	0
2	15	1	"PYC2"	"YBR218C"	9060	24590	100	368	463	372	93	97	39	97	90	0	468	623	484	80	84	31	100	98	0	0	0	0	0	0	0	0	0	0	0	0	0	0	0	0	0	0	0	0.709	0.681	0.704	0.649	1.812	0.693	0.753	0.000	0.000	0.000	0.000	0.000	0.000	0.000	0.000	0.000	0.000	0.000	0.000	0.000	0.000	80	532	663	913	-0.497	Error	Error	275	388	0	0	370	543	0	0	0	0
2	16	1	"ICS2"	"YBR157C"	9260	24590	100	1430	1230	658	93	96	38	97	95	0	2080	1816	900	78	83	27	95	95	0	0	0	0	0	0	0	0	0	0	0	0	0	0	0	0	0	0	0	0.668	0.654	0.651	0.653	2.398	0.662	0.870	0.000	0.000	0.000	0.000	0.000	0.000	0.000	0.000	0.000	0.000	0.000	0.000	0.000	0.000	80	532	3339	2875	-0.582	Error	Error	1337	2002	0	0	1137	1738	0	0	0	0
2	17	1	"NTC20"	"YBR188C"	9470	24590	90	1860	1754	815	99	100	39	98	98	0	2298	2250	1132	82	89	35	100	100	0	0	0	0	0	0	0	0	0	0	0	0	0	0	0	0	0	0	0	0.795	0.763	0.768	0.759	2.067	0.724	0.843	0.000	0.000	0.000	0.000	0.000	0.000	0.000	0.000	0.000	0.000	0.000	0.000	0.000	0.000	52	412	3977	3823	-0.332	Error	Error	1761	2216	0	0	1655	2168	0	0	0	0
2	18	1	""	"YBR220C"	9660	24590	90	2148	2593	2284	96	101	40	100	98	0	3899	4093	2506	84	91	33	100	100	0	0	0	0	0	0	0	0	0	0	0	0	0	0	0	0	0	0	0	0.538	0.623	0.570	0.566	1.771	0.664	0.736	0.000	0.000	0.000	0.000	0.000	0.000	0.000	0.000	0.000	0.000	0.000	0.000	0.000	0.000	52	412	5867	6506	-0.895	Error	Error	2052	3815	0	0	2497	4009	0	0	0	0
2	19	1	""	"YBR159W"	9860	24590	100	1635	1468	687	93	98	41	97	96	0	2156	2158	985	83	87	25	100	100	0	0	0	0	0	0	0	0	0	0	0	0	0	0	0	0	0	0	0	0.744	0.663	0.668	0.631	1.677	0.654	0.876	0.000	0.000	0.000	0.000	0.000	0.000	0.000	0.000	0.000	0.000	0.000	0.000	0.000	0.000	80	540	3615	3450	-0.427	Error	Error	1542	2073	0	0	1375	2075	0	0	0	0
2	20	1	""	"YBR190W"	10070	24590	90	615	586	299	93	100	41	90	90	0	728	678	247	87	91	23	100	100	0	0	0	0	0	0	0	0	0	0	0	0	0	0	0	0	0	0	0	0.814	0.834	0.824	0.740	2.002	0.916	0.768	0.000	0.000	0.000	0.000	0.000	0.000	0.000	0.000	0.000	0.000	0.000	0.000	0.000	0.000	52	412	1163	1084	-0.296	Error	Error	522	641	0	0	493	591	0	0	0	0
2	21	1	"FAT2"	"YBR222C"	10270	24590	80	945	1093	836	98	101	41	94	90	0	1435	1747	1239	90	97	31	100	100	0	0	0	0	0	0	0	0	0	0	0	0	0	0	0	0	0	0	0	0.630	0.600	0.590	0.500	2.094	0.615	0.860	0.000	0.000	0.000	0.000	0.000	0.000	0.000	0.000	0.000	0.000	0.000	0.000	0.000	0.000	52	312	2192	2652	-0.667	Error	Error	847	1345	0	0	995	1657	0	0	0	0
2	1	2	""	"YBR161W"	6260	24800	90	21417	19768	7379	91	97	44	100	100	0	9902	8635	3332	69	77	46	100	100	0	0	0	0	0	0	0	0	0	0	0	0	0	0	0	0	0	0	0	2.169	2.297	2.283	2.242	1.483	2.268	0.930	0.000	0.000	0.000	0.000	0.000	0.000	0.000	0.000	0.000	0.000	0.000	0.000	0.000	0.000	52	420	31159	28243	1.117	Error	Error	21326	9833	0	0	19677	8566	0	0	0	0
2	2	2	"RIM2"	"YBR192W"	6460	24800	80	18974	16809	7206	99	104	42	100	100	0	7203	6759	2375	72	82	85	100	100	0	0	0	0	0	0	0	0	0	0	0	0	0	0	0	0	0	0	0	2.647	2.499	2.657	2.262	1.667	2.645	0.908	0.000	0.000	0.000	0.000	0.000	0.000	0.000	0.000	0.000	0.000	0.000	0.000	0.000	0.000	52	340	26006	23397	1.404	Error	Error	18875	7131	0	0	16710	6687	0	0	0	0
2	3	2	""	"YBR224W"	6680	24810	100	3701	3601	1788	91	95	40	100	98	0	4831	4664	2135	72	77	31	100	100	0	0	0	0	0	0	0	0	0	0	0	0	0	0	0	0	0	0	0	0.759	0.764	0.742	0.685	1.684	0.776	0.921	0.000	0.000	0.000	0.000	0.000	0.000	0.000	0.000	0.000	0.000	0.000	0.000	0.000	0.000	80	534	8369	8102	-0.399	Error	Error	3610	4759	0	0	3510	4592	0	0	0	0
2	4	2	"GPM2"	"YDL021W"	6860	24800	90	3094	5120	4628	90	94	41	100	100	0	1755	2569	2161	69	75	33	100	100	0	0	0	0	0	0	0	0	0	0	0	0	0	0	0	0	0	0	0	1.782	2.012	2.017	1.911	1.635	2.114	0.946	0.000	0.000	0.000	0.000	0.000	0.000	0.000	0.000	0.000	0.000	0.000	0.000	0.000	0.000	52	407	4690	7530	0.833	Error	Error	3004	1686	0	0	5030	2500	0	0	0	0
2	5	2	""	"YDL053C"	7060	24810	100	1732	2184	1595	90	98	53	98	97	0	2283	2721	1882	70	83	167	95	95	0	0	0	0	0	0	0	0	0	0	0	0	0	0	0	0	0	0	0	0.742	0.790	0.763	0.784	1.755	0.806	0.925	0.000	0.000	0.000	0.000	0.000	0.000	0.000	0.000	0.000	0.000	0.000	0.000	0.000	0.000	80	542	3855	4745	-0.431	Error	Error	1642	2213	0	0	2094	2651	0	0	0	0
2	6	2	""	"YDL085W"	7260	24800	90	2674	3578	2572	97	100	42	100	98	0	5298	6033	4308	74	81	33	100	100	0	0	0	0	0	0	0	0	0	0	0	0	0	0	0	0	0	0	0	0.493	0.584	0.583	0.554	1.824	0.575	0.920	0.000	0.000	0.000	0.000	0.000	0.000	0.000	0.000	0.000	0.000	0.000	0.000	0.000	0.000	52	420	7801	9440	-1.019	Error	Error	2577	5224	0	0	3481	5959	0	0	0	0
2	7	2	""	"YDL023C"	7470	24810	80	1145	1598	1224	94	99	52	96	96	0	1486	1865	1383	72	83	91	100	96	0	0	0	0	0	0	0	0	0	0	0	0	0	0	0	0	0	0	0	0.743	0.839	0.831	0.754	2.080	0.853	0.897	0.000	0.000	0.000	0.000	0.000	0.000	0.000	0.000	0.000	0.000	0.000	0.000	0.000	0.000	52	340	2465	3297	-0.428	Error	Error	1051	1414	0	0	1504	1793	0	0	0	0
2	8	2	"PSA1"	"YDL055C"	7660	24800	90	2351	2458	1549	93	95	40	100	98	0	1416	1503	934	74	78	32	100	100	0	0	0	0	0	0	0	0	0	0	0	0	0	0	0	0	0	0	0	1.683	1.655	1.622	1.569	1.785	1.694	0.872	0.000	0.000	0.000	0.000	0.000	0.000	0.000	0.000	0.000	0.000	0.000	0.000	0.000	0.000	52	420	3600	3794	0.751	Error	Error	2258	1342	0	0	2365	1429	0	0	0	0
2	9	2	"LUC7"	"YDL087C"	7860	24800	100	2946	2877	1494	91	97	42	98	97	0	4815	4736	2527	76	81	32	98	96	0	0	0	0	0	0	0	0	0	0	0	0	0	0	0	0	0	0	0	0.602	0.598	0.605	0.645	1.860	0.588	0.938	0.000	0.000	0.000	0.000	0.000	0.000	0.000	0.000	0.000	0.000	0.000	0.000	0.000	0.000	80	528	7594	7446	-0.731	Error	Error	2855	4739	0	0	2786	4660	0	0	0	0
2	10	2	""	"YDL025C"	8060	24800	100	3504	3378	1198	94	100	42	100	100	0	3728	3836	1519	78	84	30	100	100	0	0	0	0	0	0	0	0	0	0	0	0	0	0	0	0	0	0	0	0.934	0.874	0.910	0.872	1.475	0.846	0.912	0.000	0.000	0.000	0.000	0.000	0.000	0.000	0.000	0.000	0.000	0.000	0.000	0.000	0.000	80	534	7060	7042	-0.098	Error	Error	3410	3650	0	0	3284	3758	0	0	0	0
2	11	2	""	"YDL057W"	8270	24800	80	1185	2145	2314	96	102	45	100	100	0	1230	1914	1901	77	84	32	100	100	0	0	0	0	0	0	0	0	0	0	0	0	0	0	0	0	0	0	0	0.944	1.115	1.166	1.036	1.939	1.187	0.897	0.000	0.000	0.000	0.000	0.000	0.000	0.000	0.000	0.000	0.000	0.000	0.000	0.000	0.000	52	340	2242	3886	-0.082	Error	Error	1089	1153	0	0	2049	1837	0	0	0	0
2	12	2	""	"YDL089W"	8470	24810	90	427	678	650	93	100	45	96	84	0	529	626	437	78	83	26	100	100	0	0	0	0	0	0	0	0	0	0	0	0	0	0	0	0	0	0	0	0.741	1.068	1.047	0.817	2.283	1.304	0.854	0.000	0.000	0.000	0.000	0.000	0.000	0.000	0.000	0.000	0.000	0.000	0.000	0.000	0.000	52	414	785	1133	-0.433	Error	Error	334	451	0	0	585	548	0	0	0	0
2	13	2	""	"YDL027C"	8660	24800	100	4003	3962	1529	94	101	42	100	100	0	4657	4248	1493	81	85	31	100	100	0	0	0	0	0	0	0	0	0	0	0	0	0	0	0	0	0	0	0	0.854	0.928	0.927	0.890	1.670	0.934	0.894	0.000	0.000	0.000	0.000	0.000	0.000	0.000	0.000	0.000	0.000	0.000	0.000	0.000	0.000	80	535	8485	8035	-0.227	Error	Error	3909	4576	0	0	3868	4167	0	0	0	0
2	14	2	"RAD59"	"YDL059C"	8860	24790	90	2127	1897	901	96	104	47	100	96	0	2403	2338	867	84	91	59	100	100	0	0	0	0	0	0	0	0	0	0	0	0	0	0	0	0	0	0	0	0.876	0.799	0.810	0.682	1.778	0.820	0.878	0.000	0.000	0.000	0.000	0.000	0.000	0.000	0.000	0.000	0.000	0.000	0.000	0.000	0.000	52	420	4350	4055	-0.191	Error	Error	2031	2319	0	0	1801	2254	0	0	0	0
2	15	2	""	"YDL091C"	9050	24790	90	9350	8369	3618	97	101	40	100	100	0	6059	5787	2088	82	87	32	100	100	0	0	0	0	0	0	0	0	0	0	0	0	0	0	0	0	0	0	0	1.548	1.450	1.451	1.329	1.594	1.507	0.910	0.000	0.000	0.000	0.000	0.000	0.000	0.000	0.000	0.000	0.000	0.000	0.000	0.000	0.000	52	420	15230	13977	0.630	Error	Error	9253	5977	0	0	8272	5705	0	0	0	0
2	16	2	"RPA14"	"YDR156W"	9260	24790	80	199	198	79	96	103	46	71	55	0	329	318	95	80	85	27	100	96	0	0	0	0	0	0	0	0	0	0	0	0	0	0	0	0	0	0	0	0.414	0.429	0.484	0.410	2.595	0.454	0.288	0.000	0.000	0.000	0.000	0.000	0.000	0.000	0.000	0.000	0.000	0.000	0.000	0.000	0.000	52	340	352	340	-1.274	Error	Error	103	249	0	0	102	238	0	0	0	0
2	17	2	""	"YDR187C"	9470	24790	70	245	675	1318	94	100	40	75	71	0	315	771	1311	83	89	41	100	93	0	0	0	0	0	0	0	0	0	0	0	0	0	0	0	0	0	0	0	0.651	0.844	0.634	0.652	2.043	0.978	0.770	0.000	0.000	0.000	0.000	0.000	0.000	0.000	0.000	0.000	0.000	0.000	0.000	0.000	0.000	32	236	383	1269	-0.620	Error	Error	151	232	0	0	581	688	0	0	0	0
2	18	2	""	"YDR219C"	9660	24780	70	260	584	811	99	103	38	81	75	0	385	650	740	89	94	35	93	90	0	0	0	0	0	0	0	0	0	0	0	0	0	0	0	0	0	0	0	0.544	0.865	0.694	0.689	2.860	1.035	0.806	0.000	0.000	0.000	0.000	0.000	0.000	0.000	0.000	0.000	0.000	0.000	0.000	0.000	0.000	32	236	457	1046	-0.879	Error	Error	161	296	0	0	485	561	0	0	0	0
2	19	2	"HOM2"	"YDR158W"	9870	24790	90	2930	5062	6386	96	104	44	98	96	0	3026	5720	6907	88	92	28	100	100	0	0	0	0	0	0	0	0	0	0	0	0	0	0	0	0	0	0	0	0.965	0.882	0.822	0.807	2.141	0.900	0.875	0.000	0.000	0.000	0.000	0.000	0.000	0.000	0.000	0.000	0.000	0.000	0.000	0.000	0.000	52	420	5772	10598	-0.052	Error	Error	2834	2938	0	0	4966	5632	0	0	0	0
2	20	2	"SLY1"	"YDR189W"	10060	24790	80	2326	3199	2454	97	100	43	100	100	0	1800	2367	1665	88	94	29	100	100	0	0	0	0	0	0	0	0	0	0	0	0	0	0	0	0	0	0	0	1.302	1.361	1.383	1.307	1.840	1.437	0.900	0.000	0.000	0.000	0.000	0.000	0.000	0.000	0.000	0.000	0.000	0.000	0.000	0.000	0.000	52	340	3941	5381	0.381	Error	Error	2229	1712	0	0	3102	2279	0	0	0	0
2	21	2	""	"YDR221W"	10270	24790	70	363	953	1666	99	103	40	96	96	0	635	1630	2443	95	98	29	100	100	0	0	0	0	0	0	0	0	0	0	0	0	0	0	0	0	0	0	0	0.489	0.556	0.385	0.431	2.060	0.643	0.912	0.000	0.000	0.000	0.000	0.000	0.000	0.000	0.000	0.000	0.000	0.000	0.000	0.000	0.000	32	230	804	2389	-1.032	Error	Error	264	540	0	0	854	1535	0	0	0	0
2	1	3	"SSY1"	"YDR160W"	6260	25000	80	4194	8266	7640	89	95	37	100	100	0	4750	7679	6760	70	75	25	100	100	0	0	0	0	0	0	0	0	0	0	0	0	0	0	0	0	0	0	0	0.877	1.075	0.986	1.044	2.028	1.102	0.916	0.000	0.000	0.000	0.000	0.000	0.000	0.000	0.000	0.000	0.000	0.000	0.000	0.000	0.000	52	340	8785	15786	-0.189	Error	Error	4105	4680	0	0	8177	7609	0	0	0	0
2	2	3	"HST4"	"YDR191W"	6470	25010	80	2645	4129	4544	88	95	43	98	96	0	2995	4413	4247	73	76	25	100	98	0	0	0	0	0	0	0	0	0	0	0	0	0	0	0	0	0	0	0	0.875	0.931	0.833	0.775	1.796	1.011	0.898	0.000	0.000	0.000	0.000	0.000	0.000	0.000	0.000	0.000	0.000	0.000	0.000	0.000	0.000	52	340	5479	8381	-0.193	Error	Error	2557	2922	0	0	4041	4340	0	0	0	0
2	3	3	""	"YDR223W"	6660	25000	60	149	182	105	88	95	38	62	43	0	195	243	150	69	71	20	90	90	0	0	0	0	0	0	0	0	0	0	0	0	0	0	0	0	0	0	0	0.484	0.540	0.482	0.547	3.319	0.508	0.273	0.000	0.000	0.000	0.000	0.000	0.000	0.000	0.000	0.000	0.000	0.000	0.000	0.000	0.000	32	176	187	268	-1.047	Error	Error	61	126	0	0	94	174	0	0	0	0
2	4	3	"NBP2"	"YDR162C"	6870	25010	60	149	160	81	92	97	39	59	43	0	181	211	114	70	74	27	84	71	0	0	0	0	0	0	0	0	0	0	0	0	0	0	0	0	0	0	0	0.514	0.482	0.719	0.740	3.864	0.514	0.239	0.000	0.000	0.000	0.000	0.000	0.000	0.000	0.000	0.000	0.000	0.000	0.000	0.000	0.000	32	176	168	209	-0.962	Error	Error	57	111	0	0	68	141	0	0	0	0
2	5	3	""	"YDR193W"	7060	25010	80	1943	2188	1681	87	95	52	96	94	0	2297	2555	1860	72	88	196	96	88	0	0	0	0	0	0	0	0	0	0	0	0	0	0	0	0	0	0	0	0.834	0.846	0.796	0.808	1.857	0.861	0.854	0.000	0.000	0.000	0.000	0.000	0.000	0.000	0.000	0.000	0.000	0.000	0.000	0.000	0.000	52	334	4081	4584	-0.262	Error	Error	1856	2225	0	0	2101	2483	0	0	0	0
2	6	3	"HTA1"	"YDR225W"	7260	25000	80	8948	8294	4115	94	99	55	96	96	0	4571	4041	1842	73	83	56	100	100	0	0	0	0	0	0	0	0	0	0	0	0	0	0	0	0	0	0	0	1.968	2.067	2.075	1.934	1.930	2.171	0.878	0.000	0.000	0.000	0.000	0.000	0.000	0.000	0.000	0.000	0.000	0.000	0.000	0.000	0.000	52	340	13352	12168	0.977	Error	Error	8854	4498	0	0	8200	3968	0	0	0	0
2	7	3	""	"YDR539W"	7460	25010	80	263	538	1206	99	103	39	75	65	0	307	631	1457	72	79	27	94	92	0	0	0	0	0	0	0	0	0	0	0	0	0	0	0	0	0	0	0	0.698	0.785	0.625	0.566	2.564	0.816	0.883	0.000	0.000	0.000	0.000	0.000	0.000	0.000	0.000	0.000	0.000	0.000	0.000	0.000	0.000	52	340	399	998	-0.519	Error	Error	164	235	0	0	439	559	0	0	0	0
2	8	3	""	"YEL025C"	7670	25010	90	877	2497	3472	93	100	66	98	94	0	1029	2708	3791	75	84	43	100	98	0	0	0	0	0	0	0	0	0	0	0	0	0	0	0	0	0	0	0	0.822	0.913	0.755	0.805	2.184	0.909	0.834	0.000	0.000	0.000	0.000	0.000	0.000	0.000	0.000	0.000	0.000	0.000	0.000	0.000	0.000	52	420	1738	5037	-0.283	Error	Error	784	954	0	0	2404	2633	0	0	0	0
2	9	3	""	"YEL057C"	7860	25000	80	1124	1954	1854	98	101	42	100	96	0	1580	2479	2078	76	84	35	100	100	0	0	0	0	0	0	0	0	0	0	0	0	0	0	0	0	0	0	0	0.682	0.772	0.714	0.641	1.990	0.831	0.934	0.000	0.000	0.000	0.000	0.000	0.000	0.000	0.000	0.000	0.000	0.000	0.000	0.000	0.000	52	340	2530	4259	-0.552	Error	Error	1026	1504	0	0	1856	2403	0	0	0	0
2	10	3	""	"YDR541C"	8050	25000	80	260	1086	1904	91	97	40	84	69	0	349	1205	2046	77	85	39	90	82	0	0	0	0	0	0	0	0	0	0	0	0	0	0	0	0	0	0	0	0.621	0.882	0.661	0.718	2.665	0.912	0.780	0.000	0.000	0.000	0.000	0.000	0.000	0.000	0.000	0.000	0.000	0.000	0.000	0.000	0.000	52	340	441	2123	-0.687	Error	Error	169	272	0	0	995	1128	0	0	0	0
2	11	3	"CUP5"	"YEL027W"	8260	25000	60	2635	3026	1955	103	133	159	93	93	0	2187	2813	1876	81	130	220	100	96	0	0	0	0	0	0	0	0	0	0	0	0	0	0	0	0	0	0	0	1.202	1.070	1.106	1.043	1.778	1.050	0.872	0.000	0.000	0.000	0.000	0.000	0.000	0.000	0.000	0.000	0.000	0.000	0.000	0.000	0.000	32	176	4638	5655	0.266	Error	Error	2532	2106	0	0	2923	2732	0	0	0	0
2	12	3	"SOM1"	"YEL059C-A"	8450	24990	70	1329	1407	548	95	112	115	100	100	0	2107	1991	803	82	113	193	100	96	0	0	0	0	0	0	0	0	0	0	0	0	0	0	0	0	0	0	0	0.609	0.687	0.681	0.709	1.663	0.662	0.842	0.000	0.000	0.000	0.000	0.000	0.000	0.000	0.000	0.000	0.000	0.000	0.000	0.000	0.000	32	236	3259	3221	-0.715	Error	Error	1234	2025	0	0	1312	1909	0	0	0	0
2	13	3	""	"YDR543C"	8670	25000	80	136	154	87	93	100	42	50	32	0	184	217	123	82	98	67	73	34	0	0	0	0	0	0	0	0	0	0	0	0	0	0	0	0	0	0	0	0.422	0.452	0.552	0.603	2.503	0.291	0.172	0.000	0.000	0.000	0.000	0.000	0.000	0.000	0.000	0.000	0.000	0.000	0.000	0.000	0.000	52	340	145	196	-1.246	Error	Error	43	102	0	0	61	135	0	0	0	0
2	14	3	""	"YEL029C"	8860	25000	80	981	2560	2882	98	102	45	98	98	0	1094	2462	2580	82	94	51	100	100	0	0	0	0	0	0	0	0	0	0	0	0	0	0	0	0	0	0	0	0.873	1.034	0.918	0.872	1.885	1.090	0.924	0.000	0.000	0.000	0.000	0.000	0.000	0.000	0.000	0.000	0.000	0.000	0.000	0.000	0.000	52	340	1895	4842	-0.197	Error	Error	883	1012	0	0	2462	2380	0	0	0	0
2	15	3	"PRB1"	"YEL060C"	9060	25000	80	202	248	195	98	103	44	75	50	0	308	377	250	84	94	49	96	86	0	0	0	0	0	0	0	0	0	0	0	0	0	0	0	0	0	0	0	0.464	0.512	0.574	0.478	2.645	0.632	0.635	0.000	0.000	0.000	0.000	0.000	0.000	0.000	0.000	0.000	0.000	0.000	0.000	0.000	0.000	52	340	328	443	-1.107	Error	Error	104	224	0	0	150	293	0	0	0	0
2	16	3	"YRF1-1"	"YDR545W"	9260	25000	70	543	796	796	89	97	41	87	78	0	618	1217	1221	84	92	49	100	100	0	0	0	0	0	0	0	0	0	0	0	0	0	0	0	0	0	0	0	0.850	0.624	0.573	0.500	2.290	0.582	0.706	0.000	0.000	0.000	0.000	0.000	0.000	0.000	0.000	0.000	0.000	0.000	0.000	0.000	0.000	32	236	988	1840	-0.234	Error	Error	454	534	0	0	707	1133	0	0	0	0
2	17	3	"SPF1"	"YEL031W"	9470	25010	90	162	163	67	96	100	42	63	36	0	216	234	126	88	97	53	88	61	0	0	0	0	0	0	0	0	0	0	0	0	0	0	0	0	0	0	0	0.516	0.459	0.675	0.577	2.538	0.254	0.175	0.000	0.000	0.000	0.000	0.000	0.000	0.000	0.000	0.000	0.000	0.000	0.000	0.000	0.000	52	420	194	213	-0.956	Error	Error	66	128	0	0	67	146	0	0	0	0
2	18	3	"NPR2"	"YEL062W"	9650	24980	70	1368	1928	1450	100	114	98	100	100	0	1491	1825	1190	90	104	93	96	96	0	0	0	0	0	0	0	0	0	0	0	0	0	0	0	0	0	0	0	0.905	1.054	0.910	1.037	1.953	1.134	0.836	0.000	0.000	0.000	0.000	0.000	0.000	0.000	0.000	0.000	0.000	0.000	0.000	0.000	0.000	32	236	2669	3563	-0.144	Error	Error	1268	1401	0	0	1828	1735	0	0	0	0
2	19	3	"PES4"	"YFR023W"	9870	25000	80	3102	6207	6226	92	99	43	100	100	0	1856	3001	2589	91	94	26	100	100	0	0	0	0	0	0	0	0	0	0	0	0	0	0	0	0	0	0	0	1.705	2.101	1.826	1.766	1.898	2.360	0.881	0.000	0.000	0.000	0.000	0.000	0.000	0.000	0.000	0.000	0.000	0.000	0.000	0.000	0.000	52	340	4775	9025	0.770	Error	Error	3010	1765	0	0	6115	2910	0	0	0	0
2	20	3	"HXK1"	"YFR053C"	10060	25000	80	3171	3875	2521	93	97	43	100	100	0	3789	4032	2255	89	92	26	100	100	0	0	0	0	0	0	0	0	0	0	0	0	0	0	0	0	0	0	0	0.832	0.959	0.962	0.841	1.700	1.009	0.909	0.000	0.000	0.000	0.000	0.000	0.000	0.000	0.000	0.000	0.000	0.000	0.000	0.000	0.000	52	340	6778	7725	-0.266	Error	Error	3078	3700	0	0	3782	3943	0	0	0	0
2	21	3	"SCW11"	"YGL028C"	10260	25000	90	2811	3323	2455	96	99	41	100	100	0	3026	3568	2541	96	99	29	100	100	0	0	0	0	0	0	0	0	0	0	0	0	0	0	0	0	0	0	0	0.927	0.929	0.930	0.893	1.707	0.943	0.931	0.000	0.000	0.000	0.000	0.000	0.000	0.000	0.000	0.000	0.000	0.000	0.000	0.000	0.000	52	420	5645	6699	-0.110	Error	Error	2715	2930	0	0	3227	3472	0	0	0	0
2	1	4	""	"YFR024C-A"	6260	25220	70	296	681	770	95	102	44	90	71	0	367	580	504	66	72	24	100	100	0	0	0	0	0	0	0	0	0	0	0	0	0	0	0	0	0	0	0	0.668	1.140	0.671	0.692	2.895	1.467	0.692	0.000	0.000	0.000	0.000	0.000	0.000	0.000	0.000	0.000	0.000	0.000	0.000	0.000	0.000	32	236	502	1100	-0.583	Error	Error	201	301	0	0	586	514	0	0	0	0
2	2	4	""	"YFR055W"	6450	25210	90	8410	8651	3902	95	99	43	100	100	0	9692	8878	3963	70	76	42	100	100	0	0	0	0	0	0	0	0	0	0	0	0	0	0	0	0	0	0	0	0.864	0.971	1.003	0.974	1.450	0.960	0.918	0.000	0.000	0.000	0.000	0.000	0.000	0.000	0.000	0.000	0.000	0.000	0.000	0.000	0.000	52	420	17937	17364	-0.211	Error	Error	8315	9622	0	0	8556	8808	0	0	0	0
2	3	4	"RPL30"	"YGL030W"	6670	25220	80	1314	2472	2648	94	103	48	94	94	0	1581	2886	2704	70	77	43	100	100	0	0	0	0	0	0	0	0	0	0	0	0	0	0	0	0	0	0	0	0.807	0.844	0.801	0.689	2.260	0.917	0.911	0.000	0.000	0.000	0.000	0.000	0.000	0.000	0.000	0.000	0.000	0.000	0.000	0.000	0.000	52	340	2731	5194	-0.309	Error	Error	1220	1511	0	0	2378	2816	0	0	0	0
2	4	4	""	"YFR026C"	6860	25200	90	5011	4260	2175	91	100	45	98	98	0	7456	5814	2776	73	86	84	100	98	0	0	0	0	0	0	0	0	0	0	0	0	0	0	0	0	0	0	0	0.666	0.726	0.722	0.696	2.085	0.730	0.908	0.000	0.000	0.000	0.000	0.000	0.000	0.000	0.000	0.000	0.000	0.000	0.000	0.000	0.000	52	396	12303	9910	-0.586	Error	Error	4920	7383	0	0	4169	5741	0	0	0	0
2	5	4	""	"YFR057W"	7050	25210	150	91	98	43	89	97	47	17	4	0	78	88	42	72	83	126	4	0	0	0	0	0	0	0	0	0	0	0	0	0	0	0	0	0	0	0	0	0.333	0.563	1.592	1.661	3.759	0.227	0.202	0.000	0.000	0.000	0.000	0.000	0.000	0.000	0.000	0.000	0.000	0.000	0.000	0.000	0.000	156	953	8	25	-1.585	Error	Error	2	6	0	0	9	16	0	0	-50	0
2	6	4	"AGA2"	"YGL032C"	7250	25200	90	4160	3779	1405	91	99	45	100	100	0	4029	3577	1294	75	82	47	100	100	0	0	0	0	0	0	0	0	0	0	0	0	0	0	0	0	0	0	0	1.029	1.053	1.022	1.019	1.388	1.040	0.925	0.000	0.000	0.000	0.000	0.000	0.000	0.000	0.000	0.000	0.000	0.000	0.000	0.000	0.000	52	406	8023	7190	0.041	Error	Error	4069	3954	0	0	3688	3502	0	0	0	0
2	7	4	"CDC14"	"YFR028C"	7460	25210	80	8572	7612	2657	95	102	47	100	100	0	8418	7641	2290	77	85	45	100	100	0	0	0	0	0	0	0	0	0	0	0	0	0	0	0	0	0	0	0	1.016	0.994	1.031	0.916	1.585	1.005	0.905	0.000	0.000	0.000	0.000	0.000	0.000	0.000	0.000	0.000	0.000	0.000	0.000	0.000	0.000	52	340	16818	15081	0.023	Error	Error	8477	8341	0	0	7517	7564	0	0	0	0
2	8	4	"ERP6"	"YGL002W"	7660	25210	100	14084	12681	7664	89	96	45	98	98	0	3654	3148	1928	76	82	40	92	90	0	0	0	0	0	0	0	0	0	0	0	0	0	0	0	0	0	0	0	3.911	4.099	4.042	3.934	1.920	4.218	0.911	0.000	0.000	0.000	0.000	0.000	0.000	0.000	0.000	0.000	0.000	0.000	0.000	0.000	0.000	80	528	17573	15664	1.968	Error	Error	13995	3578	0	0	12592	3072	0	0	0	0
2	9	4	""	"YGL034C"	7850	25210	80	416	425	193	95	102	44	94	92	0	606	627	216	75	81	31	100	100	0	0	0	0	0	0	0	0	0	0	0	0	0	0	0	0	0	0	0	0.605	0.598	0.554	0.538	1.806	0.621	0.693	0.000	0.000	0.000	0.000	0.000	0.000	0.000	0.000	0.000	0.000	0.000	0.000	0.000	0.000	52	340	852	882	-0.726	Error	Error	321	531	0	0	330	552	0	0	0	0
2	10	4	"RPL11B"	"YGR085C"	8060	25200	80	4757	4198	2132	92	100	43	100	98	0	5636	4828	2343	81	87	31	100	98	0	0	0	0	0	0	0	0	0	0	0	0	0	0	0	0	0	0	0	0.840	0.865	0.855	0.888	1.992	0.867	0.897	0.000	0.000	0.000	0.000	0.000	0.000	0.000	0.000	0.000	0.000	0.000	0.000	0.000	0.000	52	340	10220	8853	-0.252	Error	Error	4665	5555	0	0	4106	4747	0	0	0	0
2	11	4	""	"YGR117C"	8260	25210	80	10901	11065	5687	97	99	41	100	100	0	5590	5014	2263	81	87	37	100	100	0	0	0	0	0	0	0	0	0	0	0	0	0	0	0	0	0	0	0	1.961	2.223	2.184	2.053	1.839	2.396	0.907	0.000	0.000	0.000	0.000	0.000	0.000	0.000	0.000	0.000	0.000	0.000	0.000	0.000	0.000	52	340	16313	15901	0.972	Error	Error	10804	5509	0	0	10968	4933	0	0	0	0
2	12	4	""	"YGR149W"	8450	25200	80	6356	6476	3890	99	104	61	100	96	0	5028	4890	2525	81	94	95	100	100	0	0	0	0	0	0	0	0	0	0	0	0	0	0	0	0	0	0	0	1.265	1.326	1.261	1.139	1.991	1.437	0.849	0.000	0.000	0.000	0.000	0.000	0.000	0.000	0.000	0.000	0.000	0.000	0.000	0.000	0.000	52	340	11204	11186	0.339	Error	Error	6257	4947	0	0	6377	4809	0	0	0	0
2	13	4	"PDC6"	"YGR087C"	8660	25210	80	2808	2700	1220	96	100	41	98	98	0	5887	5411	2220	82	89	30	100	100	0	0	0	0	0	0	0	0	0	0	0	0	0	0	0	0	0	0	0	0.467	0.489	0.489	0.484	1.763	0.473	0.818	0.000	0.000	0.000	0.000	0.000	0.000	0.000	0.000	0.000	0.000	0.000	0.000	0.000	0.000	52	340	8517	7933	-1.098	Error	Error	2712	5805	0	0	2604	5329	0	0	0	0
2	14	4	"NUP57"	"YGR119C"	8850	25200	90	4878	4846	2524	97	103	47	100	100	0	4661	4598	1923	83	93	69	100	100	0	0	0	0	0	0	0	0	0	0	0	0	0	0	0	0	0	0	0	1.044	1.052	1.049	0.915	1.813	1.088	0.894	0.000	0.000	0.000	0.000	0.000	0.000	0.000	0.000	0.000	0.000	0.000	0.000	0.000	0.000	52	420	9359	9264	0.063	Error	Error	4781	4578	0	0	4749	4515	0	0	0	0
2	15	4	""	"YGR151C"	9050	25200	90	1458	1353	577	97	102	41	100	100	0	1920	1795	680	90	94	34	100	100	0	0	0	0	0	0	0	0	0	0	0	0	0	0	0	0	0	0	0	0.744	0.737	0.708	0.673	1.520	0.752	0.877	0.000	0.000	0.000	0.000	0.000	0.000	0.000	0.000	0.000	0.000	0.000	0.000	0.000	0.000	52	420	3191	2961	-0.427	Error	Error	1361	1830	0	0	1256	1705	0	0	0	0
2	16	4	""	"YGR089W"	9260	25200	70	2482	3478	2984	94	102	44	93	93	0	3133	4831	3874	86	93	31	100	100	0	0	0	0	0	0	0	0	0	0	0	0	0	0	0	0	0	0	0	0.784	0.713	0.719	0.523	2.606	0.719	0.889	0.000	0.000	0.000	0.000	0.000	0.000	0.000	0.000	0.000	0.000	0.000	0.000	0.000	0.000	32	236	5435	8129	-0.352	Error	Error	2388	3047	0	0	3384	4745	0	0	0	0
2	17	4	"MEP1"	"YGR121C"	9460	25200	90	2906	2818	1621	98	102	42	100	96	0	5198	5313	2582	86	94	49	100	100	0	0	0	0	0	0	0	0	0	0	0	0	0	0	0	0	0	0	0	0.549	0.520	0.487	0.433	1.973	0.529	0.887	0.000	0.000	0.000	0.000	0.000	0.000	0.000	0.000	0.000	0.000	0.000	0.000	0.000	0.000	52	420	7920	7947	-0.864	Error	Error	2808	5112	0	0	2720	5227	0	0	0	0
2	18	4	""	"YGR153W"	9660	25200	90	2145	2034	1025	99	103	40	98	98	0	3724	3425	1553	89	96	30	100	100	0	0	0	0	0	0	0	0	0	0	0	0	0	0	0	0	0	0	0	0.563	0.580	0.562	0.526	1.865	0.573	0.870	0.000	0.000	0.000	0.000	0.000	0.000	0.000	0.000	0.000	0.000	0.000	0.000	0.000	0.000	52	420	5681	5271	-0.829	Error	Error	2046	3635	0	0	1935	3336	0	0	0	0
2	19	4	"PRP31"	"YGR091W"	9850	25200	80	2805	2743	1202	96	103	46	100	100	0	3314	2979	1148	94	99	37	100	100	0	0	0	0	0	0	0	0	0	0	0	0	0	0	0	0	0	0	0	0.841	0.918	0.903	0.891	1.658	0.928	0.861	0.000	0.000	0.000	0.000	0.000	0.000	0.000	0.000	0.000	0.000	0.000	0.000	0.000	0.000	52	340	5929	5532	-0.249	Error	Error	2709	3220	0	0	2647	2885	0	0	0	0
2	20	4	"PPT1"	"YGR123C"	10050	25200	90	2722	2528	1075	94	101	44	100	100	0	4957	4477	1504	94	97	29	100	100	0	0	0	0	0	0	0	0	0	0	0	0	0	0	0	0	0	0	0	0.540	0.555	0.566	0.513	1.664	0.552	0.870	0.000	0.000	0.000	0.000	0.000	0.000	0.000	0.000	0.000	0.000	0.000	0.000	0.000	0.000	52	420	7491	6817	-0.888	Error	Error	2628	4863	0	0	2434	4383	0	0	0	0
2	21	4	"CYS4"	"YGR155W"	10270	25200	90	2173	1976	1036	95	101	41	98	94	0	4173	3855	1620	97	103	31	100	100	0	0	0	0	0	0	0	0	0	0	0	0	0	0	0	0	0	0	0	0.510	0.501	0.496	0.412	2.305	0.509	0.854	0.000	0.000	0.000	0.000	0.000	0.000	0.000	0.000	0.000	0.000	0.000	0.000	0.000	0.000	52	412	6154	5639	-0.972	Error	Error	2078	4076	0	0	1881	3758	0	0	0	0
2	1	5	"SET1"	"YHR119W"	6240	25420	60	697	2819	4083	90	94	43	96	96	0	558	1432	1763	68	72	24	100	100	0	0	0	0	0	0	0	0	0	0	0	0	0	0	0	0	0	0	0	1.239	2.001	1.381	1.312	2.148	2.446	0.759	0.000	0.000	0.000	0.000	0.000	0.000	0.000	0.000	0.000	0.000	0.000	0.000	0.000	0.000	32	160	1097	4093	0.309	Error	Error	607	490	0	0	2729	1364	0	0	0	0
2	2	5	""	"YHR149C"	6440	25420	60	583	1512	1897	88	95	42	93	81	0	594	1326	1519	66	70	20	100	100	0	0	0	0	0	0	0	0	0	0	0	0	0	0	0	0	0	0	0	0.938	1.130	1.052	0.918	2.128	1.225	0.893	0.000	0.000	0.000	0.000	0.000	0.000	0.000	0.000	0.000	0.000	0.000	0.000	0.000	0.000	32	176	1023	2684	-0.093	Error	Error	495	528	0	0	1424	1260	0	0	0	0
2	3	5	""	"YHR181W"	6650	25410	70	1325	2199	2288	87	92	43	96	87	0	1069	1804	1776	68	72	25	100	100	0	0	0	0	0	0	0	0	0	0	0	0	0	0	0	0	0	0	0	1.237	1.217	1.166	0.995	2.018	1.266	0.941	0.000	0.000	0.000	0.000	0.000	0.000	0.000	0.000	0.000	0.000	0.000	0.000	0.000	0.000	32	236	2239	3848	0.307	Error	Error	1238	1001	0	0	2112	1736	0	0	0	0
2	4	5	""	"YHR121W"	6860	25420	70	267	699	893	91	96	38	84	68	0	318	960	1260	67	73	39	96	93	0	0	0	0	0	0	0	0	0	0	0	0	0	0	0	0	0	0	0	0.701	0.681	0.778	0.568	3.219	0.676	0.804	0.000	0.000	0.000	0.000	0.000	0.000	0.000	0.000	0.000	0.000	0.000	0.000	0.000	0.000	32	236	427	1501	-0.512	Error	Error	176	251	0	0	608	893	0	0	0	0
2	5	5	""	"YHR151C"	7050	25410	60	481	855	881	88	98	45	87	75	0	763	1282	1181	70	75	25	100	96	0	0	0	0	0	0	0	0	0	0	0	0	0	0	0	0	0	0	0	0.567	0.633	0.504	0.487	1.976	0.680	0.859	0.000	0.000	0.000	0.000	0.000	0.000	0.000	0.000	0.000	0.000	0.000	0.000	0.000	0.000	32	176	1086	1979	-0.818	Error	Error	393	693	0	0	767	1212	0	0	0	0
2	6	5	"GND1"	"YHR183W"	7260	25420	70	1368	1949	1699	92	97	41	96	90	0	752	1074	775	74	82	39	100	100	0	0	0	0	0	0	0	0	0	0	0	0	0	0	0	0	0	0	0	1.882	1.857	1.765	1.480	1.932	2.061	0.921	0.000	0.000	0.000	0.000	0.000	0.000	0.000	0.000	0.000	0.000	0.000	0.000	0.000	0.000	32	236	1954	2857	0.912	Error	Error	1276	678	0	0	1857	1000	0	0	0	0
2	7	5	"EPT1"	"YHR123W"	7460	25420	70	322	1411	2669	98	106	46	78	71	0	587	1669	3232	74	82	32	100	100	0	0	0	0	0	0	0	0	0	0	0	0	0	0	0	0	0	0	0	0.437	0.823	0.464	0.412	3.050	0.794	0.688	0.000	0.000	0.000	0.000	0.000	0.000	0.000	0.000	0.000	0.000	0.000	0.000	0.000	0.000	32	236	737	2908	-1.195	Error	Error	224	513	0	0	1313	1595	0	0	0	0
2	8	5	"SPO16"	"YHR153C"	7650	25410	80	303	1321	2353	94	98	42	92	73	0	335	1103	1706	76	81	31	98	92	0	0	0	0	0	0	0	0	0	0	0	0	0	0	0	0	0	0	0	0.807	1.195	0.907	0.819	2.241	1.376	0.846	0.000	0.000	0.000	0.000	0.000	0.000	0.000	0.000	0.000	0.000	0.000	0.000	0.000	0.000	52	340	468	2254	-0.309	Error	Error	209	259	0	0	1227	1027	0	0	0	0
2	9	5	"ADY1"	"YHR185C"	7840	25390	50	137	153	50	97	98	42	50	33	0	173	179	52	83	93	55	91	41	0	0	0	0	0	0	0	0	0	0	0	0	0	0	0	0	0	0	0	0.444	0.583	0.500	0.294	4.927	0.722	0.554	0.000	0.000	0.000	0.000	0.000	0.000	0.000	0.000	0.000	0.000	0.000	0.000	0.000	0.000	12	104	130	152	-1.170	Error	Error	40	90	0	0	56	96	0	0	0	0
2	10	5	""	"YHR125W"	8040	25400	70	5064	5207	2266	92	106	131	100	100	0	9472	8832	4209	79	136	487	100	93	0	0	0	0	0	0	0	0	0	0	0	0	0	0	0	0	0	0	0	0.529	0.584	0.591	0.621	1.710	0.531	0.872	0.000	0.000	0.000	0.000	0.000	0.000	0.000	0.000	0.000	0.000	0.000	0.000	0.000	0.000	32	236	14365	13868	-0.918	Error	Error	4972	9393	0	0	5115	8753	0	0	0	0
2	11	5	""	"YHR155W"	8260	25400	80	644	1263	1592	97	101	41	92	90	0	986	1902	2268	81	86	36	96	94	0	0	0	0	0	0	0	0	0	0	0	0	0	0	0	0	0	0	0	0.604	0.640	0.609	0.582	2.133	0.664	0.849	0.000	0.000	0.000	0.000	0.000	0.000	0.000	0.000	0.000	0.000	0.000	0.000	0.000	0.000	52	340	1452	2987	-0.726	Error	Error	547	905	0	0	1166	1821	0	0	0	0
2	12	5	"IKI1"	"YHR187W"	8450	25410	70	152	175	104	96	100	43	56	37	0	220	289	210	82	85	26	96	84	0	0	0	0	0	0	0	0	0	0	0	0	0	0	0	0	0	0	0	0.406	0.382	0.481	0.539	2.309	0.377	0.424	0.000	0.000	0.000	0.000	0.000	0.000	0.000	0.000	0.000	0.000	0.000	0.000	0.000	0.000	32	236	194	286	-1.301	Error	Error	56	138	0	0	79	207	0	0	0	0
2	13	5	"YHC3"	"YJL059W"	8640	25400	80	2357	5067	5459	91	96	40	100	100	0	1250	1871	1820	79	85	29	96	94	0	0	0	0	0	0	0	0	0	0	0	0	0	0	0	0	0	0	0	1.935	2.777	2.529	2.734	1.884	3.088	0.867	0.000	0.000	0.000	0.000	0.000	0.000	0.000	0.000	0.000	0.000	0.000	0.000	0.000	0.000	52	340	3437	6768	0.952	Error	Error	2266	1171	0	0	4976	1792	0	0	0	0
2	14	5	""	"YJL091C"	8840	25400	80	730	759	488	94	100	39	100	96	0	750	754	472	85	90	29	100	98	0	0	0	0	0	0	0	0	0	0	0	0	0	0	0	0	0	0	0	0.956	0.994	1.013	1.017	1.916	1.002	0.810	0.000	0.000	0.000	0.000	0.000	0.000	0.000	0.000	0.000	0.000	0.000	0.000	0.000	0.000	52	340	1301	1334	-0.064	Error	Error	636	665	0	0	665	669	0	0	0	0
2	15	5	""	"YJL123C"	9050	25400	80	4695	4208	2147	95	104	66	100	100	0	8141	7565	3098	89	97	118	100	100	0	0	0	0	0	0	0	0	0	0	0	0	0	0	0	0	0	0	0	0.571	0.550	0.551	0.493	1.615	0.567	0.892	0.000	0.000	0.000	0.000	0.000	0.000	0.000	0.000	0.000	0.000	0.000	0.000	0.000	0.000	52	340	12652	11589	-0.808	Error	Error	4600	8052	0	0	4113	7476	0	0	0	0
2	16	5	"NUP82"	"YJL061W"	9250	25400	80	961	1986	2221	97	101	42	92	92	0	1567	2940	2983	88	93	32	100	98	0	0	0	0	0	0	0	0	0	0	0	0	0	0	0	0	0	0	0	0.584	0.662	0.695	0.574	2.830	0.694	0.858	0.000	0.000	0.000	0.000	0.000	0.000	0.000	0.000	0.000	0.000	0.000	0.000	0.000	0.000	52	340	2343	4741	-0.776	Error	Error	864	1479	0	0	1889	2852	0	0	0	0
2	17	5	"TOK1"	"YJL093C"	9440	25400	80	5095	5004	2126	100	103	40	100	100	0	8165	7396	2951	88	92	26	100	100	0	0	0	0	0	0	0	0	0	0	0	0	0	0	0	0	0	0	0	0.618	0.671	0.663	0.646	1.729	0.655	0.874	0.000	0.000	0.000	0.000	0.000	0.000	0.000	0.000	0.000	0.000	0.000	0.000	0.000	0.000	52	340	13072	12212	-0.693	Error	Error	4995	8077	0	0	4904	7308	0	0	0	0
2	18	5	"GCD14"	"YJL125C"	9660	25410	100	3423	3095	1379	97	102	41	100	98	0	3673	3314	1272	91	94	26	100	100	0	0	0	0	0	0	0	0	0	0	0	0	0	0	0	0	0	0	0	0.929	0.930	0.947	0.832	1.834	0.942	0.876	0.000	0.000	0.000	0.000	0.000	0.000	0.000	0.000	0.000	0.000	0.000	0.000	0.000	0.000	80	540	6908	6221	-0.107	Error	Error	3326	3582	0	0	2998	3223	0	0	0	0
2	19	5	"MRPL8"	"YJL063C"	9860	25400	80	787	862	515	95	101	43	100	94	0	1462	1517	735	93	99	38	100	100	0	0	0	0	0	0	0	0	0	0	0	0	0	0	0	0	0	0	0	0.505	0.539	0.521	0.452	1.914	0.568	0.841	0.000	0.000	0.000	0.000	0.000	0.000	0.000	0.000	0.000	0.000	0.000	0.000	0.000	0.000	52	340	2061	2191	-0.984	Error	Error	692	1369	0	0	767	1424	0	0	0	0
2	20	5	"BCK1"	"YJL095W"	10060	25400	80	2065	3410	3562	92	97	41	100	100	0	2688	3348	2913	95	97	24	100	100	0	0	0	0	0	0	0	0	0	0	0	0	0	0	0	0	0	0	0	0.761	1.020	0.952	0.852	2.437	1.145	0.811	0.000	0.000	0.000	0.000	0.000	0.000	0.000	0.000	0.000	0.000	0.000	0.000	0.000	0.000	52	340	4566	6571	-0.394	Error	Error	1973	2593	0	0	3318	3253	0	0	0	0
2	21	5	"SPT10"	"YJL127C"	10240	25400	80	343	352	154	89	97	42	98	84	0	635	664	284	98	101	26	100	100	0	0	0	0	0	0	0	0	0	0	0	0	0	0	0	0	0	0	0	0.473	0.465	0.455	0.440	1.674	0.456	0.760	0.000	0.000	0.000	0.000	0.000	0.000	0.000	0.000	0.000	0.000	0.000	0.000	0.000	0.000	52	340	791	829	-1.080	Error	Error	254	537	0	0	263	566	0	0	0	0
2	1	6	""	"YJL065C"	6250	25620	80	2181	2257	1209	92	97	46	100	100	0	4776	4533	2312	67	72	30	100	100	0	0	0	0	0	0	0	0	0	0	0	0	0	0	0	0	0	0	0	0.444	0.485	0.432	0.443	1.770	0.471	0.883	0.000	0.000	0.000	0.000	0.000	0.000	0.000	0.000	0.000	0.000	0.000	0.000	0.000	0.000	52	332	6798	6631	-1.173	Error	Error	2089	4709	0	0	2165	4466	0	0	0	0
2	2	6	""	"YJL097W"	6450	25610	70	2489	2930	1997	91	96	43	100	96	0	2825	3378	2026	70	78	47	100	100	0	0	0	0	0	0	0	0	0	0	0	0	0	0	0	0	0	0	0	0.870	0.858	0.835	0.768	1.677	0.883	0.906	0.000	0.000	0.000	0.000	0.000	0.000	0.000	0.000	0.000	0.000	0.000	0.000	0.000	0.000	32	236	5153	6147	-0.200	Error	Error	2398	2755	0	0	2839	3308	0	0	0	0
2	3	6	"TRK1"	"YJL129C"	6650	25620	80	1119	2796	3741	89	95	38	100	100	0	2504	5344	6222	67	71	22	100	100	0	0	0	0	0	0	0	0	0	0	0	0	0	0	0	0	0	0	0	0.423	0.513	0.424	0.443	1.914	0.560	0.924	0.000	0.000	0.000	0.000	0.000	0.000	0.000	0.000	0.000	0.000	0.000	0.000	0.000	0.000	52	340	3467	7984	-1.242	Error	Error	1030	2437	0	0	2707	5277	0	0	0	0
2	4	6	"OAR1"	"YKL055C"	6840	25610	80	1438	2883	2809	89	96	41	100	100	0	2538	4134	3514	69	74	34	100	100	0	0	0	0	0	0	0	0	0	0	0	0	0	0	0	0	0	0	0	0.546	0.687	0.654	0.607	1.535	0.737	0.936	0.000	0.000	0.000	0.000	0.000	0.000	0.000	0.000	0.000	0.000	0.000	0.000	0.000	0.000	52	340	3818	6859	-0.872	Error	Error	1349	2469	0	0	2794	4065	0	0	0	0
2	5	6	"CYT2"	"YKL087C"	7040	25610	80	817	2145	2579	90	95	41	96	92	0	1460	2929	3210	69	74	26	100	98	0	0	0	0	0	0	0	0	0	0	0	0	0	0	0	0	0	0	0	0.523	0.719	0.573	0.604	1.844	0.768	0.943	0.000	0.000	0.000	0.000	0.000	0.000	0.000	0.000	0.000	0.000	0.000	0.000	0.000	0.000	52	340	2118	4915	-0.936	Error	Error	727	1391	0	0	2055	2860	0	0	0	0
2	6	6	""	"YKL118W"	7240	25620	100	1567	1977	1514	91	97	41	97	96	0	1382	1620	1108	71	78	30	95	92	0	0	0	0	0	0	0	0	0	0	0	0	0	0	0	0	0	0	0	1.126	1.218	1.167	1.328	2.123	1.283	0.849	0.000	0.000	0.000	0.000	0.000	0.000	0.000	0.000	0.000	0.000	0.000	0.000	0.000	0.000	80	540	2787	3435	0.171	Error	Error	1476	1311	0	0	1886	1549	0	0	0	0
2	7	6	"NUP120"	"YKL057C"	7460	25610	60	207	879	2285	104	107	44	78	56	0	297	907	1996	79	83	25	100	100	0	0	0	0	0	0	0	0	0	0	0	0	0	0	0	0	0	0	0	0.472	0.936	0.573	0.632	2.170	1.156	0.660	0.000	0.000	0.000	0.000	0.000	0.000	0.000	0.000	0.000	0.000	0.000	0.000	0.000	0.000	32	176	321	1603	-1.082	Error	Error	103	218	0	0	775	828	0	0	0	0
2	8	6	"MIF2"	"YKL089W"	7640	25610	80	1510	3788	4723	92	97	38	100	100	0	2817	6127	6724	78	85	33	100	100	0	0	0	0	0	0	0	0	0	0	0	0	0	0	0	0	0	0	0	0.518	0.611	0.546	0.489	1.890	0.660	0.934	0.000	0.000	0.000	0.000	0.000	0.000	0.000	0.000	0.000	0.000	0.000	0.000	0.000	0.000	52	340	4157	9745	-0.950	Error	Error	1418	2739	0	0	3696	6049	0	0	0	0
2	9	6	"OAC1"	"YKL120W"	7830	25610	70	636	1373	2124	93	98	42	84	75	0	417	1427	2113	80	85	30	96	96	0	0	0	0	0	0	0	0	0	0	0	0	0	0	0	0	0	0	0	1.611	0.950	0.856	0.768	2.563	0.994	0.888	0.000	0.000	0.000	0.000	0.000	0.000	0.000	0.000	0.000	0.000	0.000	0.000	0.000	0.000	32	236	880	2627	0.688	Error	Error	543	337	0	0	1280	1347	0	0	0	0
2	10	6	""	"YKL059C"	8040	25610	80	546	2192	3401	98	102	39	98	98	0	1289	3333	4613	80	87	36	100	100	0	0	0	0	0	0	0	0	0	0	0	0	0	0	0	0	0	0	0	0.371	0.644	0.495	0.476	1.934	0.704	0.926	0.000	0.000	0.000	0.000	0.000	0.000	0.000	0.000	0.000	0.000	0.000	0.000	0.000	0.000	52	340	1657	5347	-1.432	Error	Error	448	1209	0	0	2094	3253	0	0	0	0
2	11	6	""	"YKL091C"	8250	25610	70	280	992	1353	97	101	44	81	68	0	737	1890	2293	82	91	46	100	100	0	0	0	0	0	0	0	0	0	0	0	0	0	0	0	0	0	0	0	0.279	0.495	0.304	0.267	2.573	0.544	0.883	0.000	0.000	0.000	0.000	0.000	0.000	0.000	0.000	0.000	0.000	0.000	0.000	0.000	0.000	32	236	838	2703	-1.840	Error	Error	183	655	0	0	895	1808	0	0	0	0
2	12	6	"SRP21"	"YKL122C"	8460	25610	80	377	998	1342	96	101	47	88	84	0	522	1032	1160	85	90	27	100	98	0	0	0	0	0	0	0	0	0	0	0	0	0	0	0	0	0	0	0	0.643	0.952	0.653	0.703	2.346	1.103	0.866	0.000	0.000	0.000	0.000	0.000	0.000	0.000	0.000	0.000	0.000	0.000	0.000	0.000	0.000	52	340	718	1849	-0.637	Error	Error	281	437	0	0	902	947	0	0	0	0
2	13	6	""	"YKL061W"	8650	25610	90	2543	2531	1433	96	98	41	100	96	0	1168	1129	533	85	90	31	100	100	0	0	0	0	0	0	0	0	0	0	0	0	0	0	0	0	0	0	0	2.259	2.332	2.244	1.981	1.892	2.592	0.818	0.000	0.000	0.000	0.000	0.000	0.000	0.000	0.000	0.000	0.000	0.000	0.000	0.000	0.000	52	420	3530	3479	1.176	Error	Error	2447	1083	0	0	2435	1044	0	0	0	0
2	14	6	"MBR1"	"YKL093W"	8840	25600	90	9701	8276	3358	97	101	41	100	100	0	5940	5654	1522	88	93	36	100	100	0	0	0	0	0	0	0	0	0	0	0	0	0	0	0	0	0	0	0	1.641	1.469	1.510	1.347	1.440	1.553	0.904	0.000	0.000	0.000	0.000	0.000	0.000	0.000	0.000	0.000	0.000	0.000	0.000	0.000	0.000	52	420	15456	13745	0.715	Error	Error	9604	5852	0	0	8179	5566	0	0	0	0
2	15	6	"SSH4"	"YKL124W"	9040	25610	100	5511	5978	3340	95	101	42	100	100	0	6849	6584	3255	89	98	80	97	97	0	0	0	0	0	0	0	0	0	0	0	0	0	0	0	0	0	0	0	0.801	0.906	0.944	0.905	2.370	0.931	0.894	0.000	0.000	0.000	0.000	0.000	0.000	0.000	0.000	0.000	0.000	0.000	0.000	0.000	0.000	80	548	12176	12378	-0.320	Error	Error	5416	6760	0	0	5883	6495	0	0	0	0
2	16	6	""	"YLR040C"	9250	25600	80	974	1828	2172	98	104	44	96	94	0	1155	2131	2195	91	97	28	100	100	0	0	0	0	0	0	0	0	0	0	0	0	0	0	0	0	0	0	0	0.823	0.848	0.810	0.695	2.039	0.934	0.933	0.000	0.000	0.000	0.000	0.000	0.000	0.000	0.000	0.000	0.000	0.000	0.000	0.000	0.000	52	340	1940	3770	-0.280	Error	Error	876	1064	0	0	1730	2040	0	0	0	0
2	17	6	""	"YLR072W"	9440	25600	60	198	295	232	97	106	44	84	65	0	264	391	288	98	103	32	96	96	0	0	0	0	0	0	0	0	0	0	0	0	0	0	0	0	0	0	0	0.608	0.676	0.685	0.521	2.359	0.733	0.761	0.000	0.000	0.000	0.000	0.000	0.000	0.000	0.000	0.000	0.000	0.000	0.000	0.000	0.000	32	176	267	491	-0.717	Error	Error	101	166	0	0	198	293	0	0	0	0
2	18	6	""	"YLR104W"	9660	25600	80	414	982	1219	92	99	46	86	76	0	656	1189	1238	88	92	25	98	98	0	0	0	0	0	0	0	0	0	0	0	0	0	0	0	0	0	0	0	0.567	0.808	0.554	0.509	2.602	0.917	0.901	0.000	0.000	0.000	0.000	0.000	0.000	0.000	0.000	0.000	0.000	0.000	0.000	0.000	0.000	52	340	890	1991	-0.819	Error	Error	322	568	0	0	890	1101	0	0	0	0
2	19	6	""	"YLR042C"	9840	25600	80	1874	2510	1823	91	95	41	100	100	0	2281	2613	1553	90	94	25	100	100	0	0	0	0	0	0	0	0	0	0	0	0	0	0	0	0	0	0	0	0.814	0.959	0.893	0.836	1.775	1.036	0.927	0.000	0.000	0.000	0.000	0.000	0.000	0.000	0.000	0.000	0.000	0.000	0.000	0.000	0.000	52	340	3974	4942	-0.297	Error	Error	1783	2191	0	0	2419	2523	0	0	0	0
2	20	6	""	"YLR074C"	10030	25600	70	479	791	807	91	95	41	96	93	0	774	1357	1310	94	97	24	100	100	0	0	0	0	0	0	0	0	0	0	0	0	0	0	0	0	0	0	0	0.571	0.554	0.505	0.521	1.419	0.578	0.929	0.000	0.000	0.000	0.000	0.000	0.000	0.000	0.000	0.000	0.000	0.000	0.000	0.000	0.000	32	236	1068	1963	-0.809	Error	Error	388	680	0	0	700	1263	0	0	0	0
2	21	6	""	"YLR106C"	10260	25610	80	464	952	1170	95	99	47	92	82	0	783	1447	1514	99	103	52	100	98	0	0	0	0	0	0	0	0	0	0	0	0	0	0	0	0	0	0	0	0.539	0.636	0.462	0.450	2.339	0.712	0.887	0.000	0.000	0.000	0.000	0.000	0.000	0.000	0.000	0.000	0.000	0.000	0.000	0.000	0.000	52	332	1053	2205	-0.890	Error	Error	369	684	0	0	857	1348	0	0	0	0
2	1	7	"PDC1"	"YLR044C"	6250	25820	80	678	1402	1627	90	98	48	98	90	0	957	2061	2392	68	73	30	100	100	0	0	0	0	0	0	0	0	0	0	0	0	0	0	0	0	0	0	0	0.661	0.658	0.529	0.538	1.969	0.648	0.832	0.000	0.000	0.000	0.000	0.000	0.000	0.000	0.000	0.000	0.000	0.000	0.000	0.000	0.000	52	332	1477	3305	-0.596	Error	Error	588	889	0	0	1312	1993	0	0	0	0
2	2	7	""	"YLR076C"	6450	25820	80	2236	2436	1703	91	98	45	100	100	0	3386	3648	2023	68	75	36	100	100	0	0	0	0	0	0	0	0	0	0	0	0	0	0	0	0	0	0	0	0.646	0.655	0.645	0.546	1.705	0.710	0.903	0.000	0.000	0.000	0.000	0.000	0.000	0.000	0.000	0.000	0.000	0.000	0.000	0.000	0.000	52	340	5463	5925	-0.629	Error	Error	2145	3318	0	0	2345	3580	0	0	0	0
2	3	7	""	"YLR108C"	6660	25820	80	263	701	1108	85	91	40	82	65	0	365	953	1383	70	75	29	100	100	0	0	0	0	0	0	0	0	0	0	0	0	0	0	0	0	0	0	0	0.603	0.698	0.523	0.494	2.463	0.741	0.694	0.000	0.000	0.000	0.000	0.000	0.000	0.000	0.000	0.000	0.000	0.000	0.000	0.000	0.000	52	340	473	1499	-0.729	Error	Error	178	295	0	0	616	883	0	0	0	0
2	4	7	""	"YLR046C"	6850	25820	80	311	1019	1773	87	92	39	92	84	0	660	1901	3071	68	71	22	100	100	0	0	0	0	0	0	0	0	0	0	0	0	0	0	0	0	0	0	0	0.378	0.508	0.433	0.390	2.122	0.549	0.909	0.000	0.000	0.000	0.000	0.000	0.000	0.000	0.000	0.000	0.000	0.000	0.000	0.000	0.000	52	340	816	2765	-1.402	Error	Error	224	592	0	0	932	1833	0	0	0	0
2	5	7	"BOS1"	"YLR078C"	7050	25820	90	5647	5491	3166	93	100	46	100	100	0	4546	5012	2447	73	85	101	100	100	0	0	0	0	0	0	0	0	0	0	0	0	0	0	0	0	0	0	0	1.242	1.093	1.149	0.936	1.879	1.140	0.885	0.000	0.000	0.000	0.000	0.000	0.000	0.000	0.000	0.000	0.000	0.000	0.000	0.000	0.000	52	420	10027	10337	0.312	Error	Error	5554	4473	0	0	5398	4939	0	0	0	0
2	6	7	""	"YLR110C"	7240	25810	80	2441	2279	988	94	96	41	100	100	0	4403	3966	1521	72	78	31	100	100	0	0	0	0	0	0	0	0	0	0	0	0	0	0	0	0	0	0	0	0.542	0.561	0.599	0.545	1.623	0.562	0.888	0.000	0.000	0.000	0.000	0.000	0.000	0.000	0.000	0.000	0.000	0.000	0.000	0.000	0.000	52	340	6678	6079	-0.884	Error	Error	2347	4331	0	0	2185	3894	0	0	0	0
2	7	7	""	"YLR423C"	7440	25820	80	6310	6900	4464	92	99	41	100	100	0	5392	5317	3028	75	81	31	100	100	0	0	0	0	0	0	0	0	0	0	0	0	0	0	0	0	0	0	0	1.169	1.299	1.289	1.168	1.715	1.372	0.918	0.000	0.000	0.000	0.000	0.000	0.000	0.000	0.000	0.000	0.000	0.000	0.000	0.000	0.000	52	340	11535	12050	0.226	Error	Error	6218	5317	0	0	6808	5242	0	0	0	0
2	8	7	""	"YLR455W"	7640	25820	80	2135	2898	2158	100	104	44	100	100	0	2760	3504	2360	80	85	29	100	100	0	0	0	0	0	0	0	0	0	0	0	0	0	0	0	0	0	0	0	0.759	0.817	0.794	0.749	1.852	0.849	0.903	0.000	0.000	0.000	0.000	0.000	0.000	0.000	0.000	0.000	0.000	0.000	0.000	0.000	0.000	52	340	4715	6222	-0.397	Error	Error	2035	2680	0	0	2798	3424	0	0	0	0
2	9	7	"PSP2"	"YML017W"	7850	25830	60	115	125	58	93	98	41	40	18	0	139	150	58	79	89	56	50	21	0	0	0	0	0	0	0	0	0	0	0	0	0	0	0	0	0	0	0	0.367	0.451	0.503	0.778	3.776	0.766	0.060	0.000	0.000	0.000	0.000	0.000	0.000	0.000	0.000	0.000	0.000	0.000	0.000	0.000	0.000	32	176	82	103	-1.447	Error	Error	22	60	0	0	32	71	0	0	0	0
2	10	7	"TUS1"	"YLR425W"	8050	25820	80	558	1027	1275	96	100	41	90	90	0	1208	1821	2006	82	89	38	100	100	0	0	0	0	0	0	0	0	0	0	0	0	0	0	0	0	0	0	0	0.410	0.535	0.469	0.457	2.274	0.583	0.875	0.000	0.000	0.000	0.000	0.000	0.000	0.000	0.000	0.000	0.000	0.000	0.000	0.000	0.000	52	340	1588	2670	-1.285	Error	Error	462	1126	0	0	931	1739	0	0	0	0
2	11	7	"NBP1"	"YLR457C"	8240	25820	80	1930	3178	3084	96	103	45	100	100	0	1889	3066	2706	83	89	38	100	100	0	0	0	0	0	0	0	0	0	0	0	0	0	0	0	0	0	0	0	1.016	1.033	1.039	0.958	2.112	1.095	0.916	0.000	0.000	0.000	0.000	0.000	0.000	0.000	0.000	0.000	0.000	0.000	0.000	0.000	0.000	52	340	3640	6065	0.022	Error	Error	1834	1806	0	0	3082	2983	0	0	0	0
2	12	7	"OST6"	"YML019W"	8440	25820	90	5090	4812	2743	95	97	38	100	100	0	3524	3502	1496	83	90	38	100	100	0	0	0	0	0	0	0	0	0	0	0	0	0	0	0	0	0	0	0	1.452	1.380	1.422	1.189	1.717	1.514	0.897	0.000	0.000	0.000	0.000	0.000	0.000	0.000	0.000	0.000	0.000	0.000	0.000	0.000	0.000	52	420	8436	8136	0.538	Error	Error	4995	3441	0	0	4717	3419	0	0	0	0
2	13	7	""	"YLR427W"	8630	25800	70	5865	5883	2381	95	98	40	100	100	0	11418	9730	3968	89	102	95	100	100	0	0	0	0	0	0	0	0	0	0	0	0	0	0	0	0	0	0	0	0.509	0.600	0.628	0.594	1.780	0.553	0.874	0.000	0.000	0.000	0.000	0.000	0.000	0.000	0.000	0.000	0.000	0.000	0.000	0.000	0.000	32	236	17099	15429	-0.973	Error	Error	5770	11329	0	0	5788	9641	0	0	0	0
2	14	7	"CDC91"	"YLR459W"	8850	25810	80	4560	4861	3719	97	100	42	100	100	0	4169	5339	3084	90	95	31	100	100	0	0	0	0	0	0	0	0	0	0	0	0	0	0	0	0	0	0	0	1.094	0.908	0.885	0.680	2.137	1.016	0.878	0.000	0.000	0.000	0.000	0.000	0.000	0.000	0.000	0.000	0.000	0.000	0.000	0.000	0.000	52	340	8542	10013	0.130	Error	Error	4463	4079	0	0	4764	5249	0	0	0	0
2	15	7	"UNG1"	"YML021C"	9040	25810	80	3989	3697	1749	91	99	40	100	100	0	5644	5058	1881	92	95	28	100	100	0	0	0	0	0	0	0	0	0	0	0	0	0	0	0	0	0	0	0	0.702	0.726	0.739	0.679	1.547	0.751	0.909	0.000	0.000	0.000	0.000	0.000	0.000	0.000	0.000	0.000	0.000	0.000	0.000	0.000	0.000	52	340	9450	8572	-0.510	Error	Error	3898	5552	0	0	3606	4966	0	0	0	0
2	16	7	"CRN1"	"YLR429W"	9240	25810	90	4703	4632	2262	102	106	44	100	100	0	9420	8739	3288	96	100	30	100	100	0	0	0	0	0	0	0	0	0	0	0	0	0	0	0	0	0	0	0	0.493	0.524	0.537	0.466	1.723	0.531	0.895	0.000	0.000	0.000	0.000	0.000	0.000	0.000	0.000	0.000	0.000	0.000	0.000	0.000	0.000	52	420	13925	13173	-1.019	Error	Error	4601	9324	0	0	4530	8643	0	0	0	0
2	17	7	"PAU4"	"YLR461W"	9440	25810	90	10703	9774	4422	96	104	52	100	100	0	9768	9091	2527	95	101	32	100	100	0	0	0	0	0	0	0	0	0	0	0	0	0	0	0	0	0	0	0	1.097	1.076	1.138	0.944	1.560	1.195	0.886	0.000	0.000	0.000	0.000	0.000	0.000	0.000	0.000	0.000	0.000	0.000	0.000	0.000	0.000	52	420	20280	18674	0.133	Error	Error	10607	9673	0	0	9678	8996	0	0	0	0
2	18	7	""	"YML023C"	9650	25810	80	3150	3241	2093	93	101	43	100	98	0	3694	3949	2424	94	98	30	100	98	0	0	0	0	0	0	0	0	0	0	0	0	0	0	0	0	0	0	0	0.849	0.817	0.750	0.778	3.357	0.777	0.804	0.000	0.000	0.000	0.000	0.000	0.000	0.000	0.000	0.000	0.000	0.000	0.000	0.000	0.000	52	340	6657	7003	-0.236	Error	Error	3057	3600	0	0	3148	3855	0	0	0	0
2	19	7	""	"YMR187C"	9860	25820	70	492	1488	1804	95	101	43	90	84	0	745	1261	1126	101	104	29	100	100	0	0	0	0	0	0	0	0	0	0	0	0	0	0	0	0	0	0	0	0.616	1.201	0.720	0.657	2.638	1.472	0.871	0.000	0.000	0.000	0.000	0.000	0.000	0.000	0.000	0.000	0.000	0.000	0.000	0.000	0.000	32	236	1041	2553	-0.698	Error	Error	397	644	0	0	1393	1160	0	0	0	0
2	20	7	"TRS130"	"YMR218C"	10040	25800	70	229	296	265	101	104	40	84	68	0	444	500	349	100	105	30	100	100	0	0	0	0	0	0	0	0	0	0	0	0	0	0	0	0	0	0	0	0.372	0.488	0.460	0.434	2.107	0.601	0.778	0.000	0.000	0.000	0.000	0.000	0.000	0.000	0.000	0.000	0.000	0.000	0.000	0.000	0.000	32	236	472	595	-1.426	Error	Error	128	344	0	0	195	400	0	0	0	0
2	21	7	""	"YMR251W"	10240	25810	60	265	315	202	96	98	38	81	68	0	377	456	228	102	105	28	96	96	0	0	0	0	0	0	0	0	0	0	0	0	0	0	0	0	0	0	0	0.615	0.619	0.499	0.493	2.364	0.695	0.695	0.000	0.000	0.000	0.000	0.000	0.000	0.000	0.000	0.000	0.000	0.000	0.000	0.000	0.000	32	176	444	573	-0.702	Error	Error	169	275	0	0	219	354	0	0	0	0
2	1	8	"GCV2"	"YMR189W"	6230	26030	60	245	397	289	87	96	42	90	81	0	360	410	219	70	74	20	96	96	0	0	0	0	0	0	0	0	0	0	0	0	0	0	0	0	0	0	0	0.545	0.912	0.887	0.713	2.271	1.105	0.766	0.000	0.000	0.000	0.000	0.000	0.000	0.000	0.000	0.000	0.000	0.000	0.000	0.000	0.000	32	148	448	650	-0.876	Error	Error	158	290	0	0	310	340	0	0	0	0
2	2	8	"ERG8"	"YMR220W"	6450	26030	70	1303	5142	6636	89	94	43	100	100	0	2001	3961	4254	67	74	25	100	100	0	0	0	0	0	0	0	0	0	0	0	0	0	0	0	0	0	0	0	0.628	1.298	0.821	0.885	2.287	1.508	0.849	0.000	0.000	0.000	0.000	0.000	0.000	0.000	0.000	0.000	0.000	0.000	0.000	0.000	0.000	32	236	3148	8947	-0.672	Error	Error	1214	1934	0	0	5053	3894	0	0	0	0
2	3	8	""	"YMR252C"	6630	26020	60	3720	5622	4771	95	96	45	100	100	0	2112	3105	2412	70	77	30	100	100	0	0	0	0	0	0	0	0	0	0	0	0	0	0	0	0	0	0	0	1.775	1.821	1.753	1.714	1.683	1.930	0.931	0.000	0.000	0.000	0.000	0.000	0.000	0.000	0.000	0.000	0.000	0.000	0.000	0.000	0.000	32	176	5667	8562	0.828	Error	Error	3625	2042	0	0	5527	3035	0	0	0	0
2	4	8	""	"YMR191W"	6840	26020	70	186	218	159	92	96	42	75	56	0	264	335	251	72	76	25	100	93	0	0	0	0	0	0	0	0	0	0	0	0	0	0	0	0	0	0	0	0.490	0.479	0.602	0.534	2.371	0.484	0.410	0.000	0.000	0.000	0.000	0.000	0.000	0.000	0.000	0.000	0.000	0.000	0.000	0.000	0.000	32	236	286	389	-1.030	Error	Error	94	192	0	0	126	263	0	0	0	0
2	5	8	""	"YMR222C"	7060	26030	80	308	584	1261	93	96	42	78	67	0	362	655	1000	73	76	24	96	96	0	0	0	0	0	0	0	0	0	0	0	0	0	0	0	0	0	0	0	0.744	0.844	0.675	0.662	2.442	1.243	0.628	0.000	0.000	0.000	0.000	0.000	0.000	0.000	0.000	0.000	0.000	0.000	0.000	0.000	0.000	52	340	504	1073	-0.427	Error	Error	215	289	0	0	491	582	0	0	0	0
2	6	8	""	"YMR254C"	7240	26020	80	1441	1925	1448	88	92	39	100	100	0	1646	1992	1402	75	77	23	100	100	0	0	0	0	0	0	0	0	0	0	0	0	0	0	0	0	0	0	0	0.861	0.958	0.962	0.922	2.042	0.993	0.871	0.000	0.000	0.000	0.000	0.000	0.000	0.000	0.000	0.000	0.000	0.000	0.000	0.000	0.000	52	340	2924	3754	-0.216	Error	Error	1353	1571	0	0	1837	1917	0	0	0	0
2	7	8	""	"YMR193C-A"	7450	26020	90	546	675	564	93	99	43	94	86	0	901	1161	962	78	82	29	100	100	0	0	0	0	0	0	0	0	0	0	0	0	0	0	0	0	0	0	0	0.550	0.537	0.482	0.462	2.378	0.528	0.797	0.000	0.000	0.000	0.000	0.000	0.000	0.000	0.000	0.000	0.000	0.000	0.000	0.000	0.000	52	420	1276	1665	-0.861	Error	Error	453	823	0	0	582	1083	0	0	0	0
2	8	8	"MRE11"	"YMR224C"	7630	26020	60	133	138	65	87	97	47	46	18	0	158	162	39	80	85	34	93	59	0	0	0	0	0	0	0	0	0	0	0	0	0	0	0	0	0	0	0	0.590	0.622	0.902	0.782	2.256	0.830	0.043	0.000	0.000	0.000	0.000	0.000	0.000	0.000	0.000	0.000	0.000	0.000	0.000	0.000	0.000	32	176	124	133	-0.762	Error	Error	46	78	0	0	51	82	0	0	0	0
2	9	8	"COX7"	"YMR256C"	7840	26010	70	1107	1221	697	95	102	49	100	96	0	822	911	499	82	87	33	96	96	0	0	0	0	0	0	0	0	0	0	0	0	0	0	0	0	0	0	0	1.368	1.358	1.237	1.331	2.073	1.386	0.821	0.000	0.000	0.000	0.000	0.000	0.000	0.000	0.000	0.000	0.000	0.000	0.000	0.000	0.000	32	236	1752	1955	0.452	Error	Error	1012	740	0	0	1126	829	0	0	0	0
2	10	8	"NAR1"	"YNL240C"	8050	26020	80	1287	1364	748	94	98	41	100	100	0	2615	2730	1112	84	91	38	100	100	0	0	0	0	0	0	0	0	0	0	0	0	0	0	0	0	0	0	0	0.471	0.480	0.419	0.433	1.854	0.494	0.822	0.000	0.000	0.000	0.000	0.000	0.000	0.000	0.000	0.000	0.000	0.000	0.000	0.000	0.000	52	326	3724	3916	-1.085	Error	Error	1193	2531	0	0	1270	2646	0	0	0	0
2	11	8	"SEC2"	"YNL272C"	8240	26020	80	5914	6904	5431	100	104	44	98	98	0	4483	5030	3086	84	91	34	100	100	0	0	0	0	0	0	0	0	0	0	0	0	0	0	0	0	0	0	0	1.322	1.376	1.186	1.073	2.071	1.561	0.877	0.000	0.000	0.000	0.000	0.000	0.000	0.000	0.000	0.000	0.000	0.000	0.000	0.000	0.000	52	340	10213	11750	0.402	Error	Error	5814	4399	0	0	6804	4946	0	0	0	0
2	12	8	"YPT11"	"YNL304W"	8440	26010	70	5208	5473	2949	102	105	45	100	100	0	4913	4739	2001	87	99	82	100	100	0	0	0	0	0	0	0	0	0	0	0	0	0	0	0	0	0	0	0	1.058	1.155	1.184	1.014	1.662	1.249	0.872	0.000	0.000	0.000	0.000	0.000	0.000	0.000	0.000	0.000	0.000	0.000	0.000	0.000	0.000	32	236	9932	10023	0.081	Error	Error	5106	4826	0	0	5371	4652	0	0	0	0
2	13	8	""	"YNL242W"	8640	26020	80	4781	6210	4329	93	98	42	100	100	0	4582	5103	2500	91	96	30	100	100	0	0	0	0	0	0	0	0	0	0	0	0	0	0	0	0	0	0	0	1.044	1.220	1.206	1.036	1.891	1.405	0.825	0.000	0.000	0.000	0.000	0.000	0.000	0.000	0.000	0.000	0.000	0.000	0.000	0.000	0.000	52	340	9179	11129	0.062	Error	Error	4688	4491	0	0	6117	5012	0	0	0	0
2	14	8	""	"YNL274C"	8840	26020	100	4939	4593	3037	97	100	41	96	93	0	3497	3425	2048	92	98	32	95	90	0	0	0	0	0	0	0	0	0	0	0	0	0	0	0	0	0	0	0	1.422	1.349	1.451	1.468	2.726	1.419	0.879	0.000	0.000	0.000	0.000	0.000	0.000	0.000	0.000	0.000	0.000	0.000	0.000	0.000	0.000	80	537	8247	7829	0.508	Error	Error	4842	3405	0	0	4496	3333	0	0	0	0
2	15	8	""	"YNL306W"	9030	26010	90	1833	1645	836	99	106	86	100	98	0	2759	2317	996	95	116	189	96	96	0	0	0	0	0	0	0	0	0	0	0	0	0	0	0	0	0	0	0	0.651	0.696	0.640	0.650	2.347	0.705	0.845	0.000	0.000	0.000	0.000	0.000	0.000	0.000	0.000	0.000	0.000	0.000	0.000	0.000	0.000	52	414	4398	3768	-0.619	Error	Error	1734	2664	0	0	1546	2222	0	0	0	0
2	16	8	"SUI1"	"YNL244C"	9240	26010	80	923	882	353	100	106	44	98	98	0	1709	1555	496	98	105	40	100	100	0	0	0	0	0	0	0	0	0	0	0	0	0	0	0	0	0	0	0	0.511	0.537	0.530	0.485	1.643	0.557	0.832	0.000	0.000	0.000	0.000	0.000	0.000	0.000	0.000	0.000	0.000	0.000	0.000	0.000	0.000	52	340	2434	2239	-0.969	Error	Error	823	1611	0	0	782	1457	0	0	0	0
2	17	8	""	"YNL276C"	9450	26010	80	1125	1304	876	98	101	42	98	96	0	1562	1718	940	95	101	31	100	100	0	0	0	0	0	0	0	0	0	0	0	0	0	0	0	0	0	0	0	0.700	0.743	0.677	0.607	1.869	0.802	0.878	0.000	0.000	0.000	0.000	0.000	0.000	0.000	0.000	0.000	0.000	0.000	0.000	0.000	0.000	52	340	2494	2829	-0.514	Error	Error	1027	1467	0	0	1206	1623	0	0	0	0
2	18	8	"KRI1"	"YNL308C"	9650	26010	80	2169	2544	1771	99	104	41	98	98	0	2734	2943	1798	97	106	64	100	100	0	0	0	0	0	0	0	0	0	0	0	0	0	0	0	0	0	0	0	0.785	0.859	0.857	0.756	2.158	0.903	0.824	0.000	0.000	0.000	0.000	0.000	0.000	0.000	0.000	0.000	0.000	0.000	0.000	0.000	0.000	52	340	4707	5291	-0.349	Error	Error	2070	2637	0	0	2445	2846	0	0	0	0
2	19	8	""	"YNL246W"	9850	26020	100	1242	1144	694	100	106	44	97	92	0	2067	1921	911	101	108	58	95	91	0	0	0	0	0	0	0	0	0	0	0	0	0	0	0	0	0	0	0	0.581	0.574	0.568	0.500	2.070	0.607	0.847	0.000	0.000	0.000	0.000	0.000	0.000	0.000	0.000	0.000	0.000	0.000	0.000	0.000	0.000	80	535	3108	2864	-0.784	Error	Error	1142	1966	0	0	1044	1820	0	0	0	0
2	20	8	""	"YNL278W"	10040	26010	80	3620	3552	2211	101	106	46	100	100	0	6404	6464	2608	99	106	47	100	100	0	0	0	0	0	0	0	0	0	0	0	0	0	0	0	0	0	0	0	0.558	0.542	0.491	0.450	1.778	0.588	0.838	0.000	0.000	0.000	0.000	0.000	0.000	0.000	0.000	0.000	0.000	0.000	0.000	0.000	0.000	52	340	9824	9816	-0.841	Error	Error	3519	6305	0	0	3451	6365	0	0	0	0
2	21	8	""	"YNL310C"	10240	26010	80	1224	1137	562	98	105	47	100	98	0	2136	1938	707	102	106	31	100	100	0	0	0	0	0	0	0	0	0	0	0	0	0	0	0	0	0	0	0	0.554	0.566	0.580	0.494	1.601	0.627	0.850	0.000	0.000	0.000	0.000	0.000	0.000	0.000	0.000	0.000	0.000	0.000	0.000	0.000	0.000	52	340	3160	2875	-0.853	Error	Error	1126	2034	0	0	1039	1836	0	0	0	0
2	1	9	""	"YOR042W"	6240	26230	80	8222	7141	4426	95	99	42	100	100	0	18027	15601	6834	67	73	27	100	98	0	0	0	0	0	0	0	0	0	0	0	0	0	0	0	0	0	0	0	0.453	0.454	0.440	0.384	1.750	0.502	0.889	0.000	0.000	0.000	0.000	0.000	0.000	0.000	0.000	0.000	0.000	0.000	0.000	0.000	0.000	52	320	26087	22580	-1.144	Error	Error	8127	17960	0	0	7046	15534	0	0	0	0
2	2	9	"CDC21"	"YOR074C"	6450	26240	100	8542	8581	5267	93	100	51	100	100	0	6924	6849	3515	74	78	27	100	100	0	0	0	0	0	0	0	0	0	0	0	0	0	0	0	0	0	0	0	1.233	1.253	1.256	1.153	2.006	1.346	0.900	0.000	0.000	0.000	0.000	0.000	0.000	0.000	0.000	0.000	0.000	0.000	0.000	0.000	0.000	80	540	15299	15263	0.303	Error	Error	8449	6850	0	0	8488	6775	0	0	0	0
2	3	9	"VAM3"	"YOR106W"	6660	26240	100	4020	4010	2379	92	97	42	100	100	0	7284	6635	3527	76	81	31	100	100	0	0	0	0	0	0	0	0	0	0	0	0	0	0	0	0	0	0	0	0.545	0.597	0.603	0.543	2.177	0.597	0.844	0.000	0.000	0.000	0.000	0.000	0.000	0.000	0.000	0.000	0.000	0.000	0.000	0.000	0.000	80	519	11136	10477	-0.876	Error	Error	3928	7208	0	0	3918	6559	0	0	0	0
2	4	9	""	"YOR044W"	6850	26240	110	4170	4226	2597	93	99	43	100	98	0	2842	2777	1580	72	78	27	100	98	0	0	0	0	0	0	0	0	0	0	0	0	0	0	0	0	0	0	0	1.472	1.528	1.584	1.472	2.450	1.560	0.885	0.000	0.000	0.000	0.000	0.000	0.000	0.000	0.000	0.000	0.000	0.000	0.000	0.000	0.000	80	589	6847	6838	0.558	Error	Error	4077	2770	0	0	4133	2705	0	0	0	0
2	5	9	""	"YOR076C"	7050	26240	110	6760	7210	4643	89	97	44	100	100	0	5169	5526	3009	73	77	27	100	100	0	0	0	0	0	0	0	0	0	0	0	0	0	0	0	0	0	0	0	1.309	1.306	1.300	1.133	1.807	1.407	0.874	0.000	0.000	0.000	0.000	0.000	0.000	0.000	0.000	0.000	0.000	0.000	0.000	0.000	0.000	80	612	11767	12574	0.389	Error	Error	6671	5096	0	0	7121	5453	0	0	0	0
2	6	9	""	"YOR108W"	7260	26240	80	1331	2704	3189	90	99	42	100	96	0	3631	5398	5205	76	82	32	100	100	0	0	0	0	0	0	0	0	0	0	0	0	0	0	0	0	0	0	0	0.349	0.491	0.394	0.376	2.000	0.547	0.900	0.000	0.000	0.000	0.000	0.000	0.000	0.000	0.000	0.000	0.000	0.000	0.000	0.000	0.000	52	334	4796	7936	-1.518	Error	Error	1241	3555	0	0	2614	5322	0	0	0	0
2	7	9	"DBP5"	"YOR046C"	7440	26230	100	10437	10245	4372	92	96	39	100	100	0	5520	5703	2147	78	85	38	100	100	0	0	0	0	0	0	0	0	0	0	0	0	0	0	0	0	0	0	0	1.901	1.805	1.737	1.781	1.797	1.913	0.890	0.000	0.000	0.000	0.000	0.000	0.000	0.000	0.000	0.000	0.000	0.000	0.000	0.000	0.000	80	519	15787	15778	0.927	Error	Error	10345	5442	0	0	10153	5625	0	0	0	0
2	8	9	""	"YOR078W"	7630	26220	90	5607	5213	2869	91	96	39	100	100	0	6692	5835	2229	80	83	25	100	100	0	0	0	0	0	0	0	0	0	0	0	0	0	0	0	0	0	0	0	0.834	0.890	0.868	0.782	1.817	0.966	0.863	0.000	0.000	0.000	0.000	0.000	0.000	0.000	0.000	0.000	0.000	0.000	0.000	0.000	0.000	52	414	12128	10877	-0.261	Error	Error	5516	6612	0	0	5122	5755	0	0	0	0
2	9	9	""	"YOR110W"	7850	26230	60	107	129	67	94	101	39	34	21	0	208	215	81	79	85	33	87	81	0	0	0	0	0	0	0	0	0	0	0	0	0	0	0	0	0	0	0	0.101	0.257	0.447	0.280	4.401	0.375	0.221	0.000	0.000	0.000	0.000	0.000	0.000	0.000	0.000	0.000	0.000	0.000	0.000	0.000	0.000	32	176	142	171	-3.311	Error	Error	13	129	0	0	35	136	0	0	0	0
2	10	9	"RAT1"	"YOR048C"	8050	26210	150	96	105	57	93	98	43	18	5	0	88	105	66	82	89	35	21	13	0	0	0	0	0	0	0	0	0	0	0	0	0	0	0	0	0	0	0	0.500	0.522	1.021	1.047	4.163	1.226	0.055	0.000	0.000	0.000	0.000	0.000	0.000	0.000	0.000	0.000	0.000	0.000	0.000	0.000	0.000	156	970	9	35	-1.000	Error	Error	3	6	0	0	12	23	0	0	-50	0
2	11	9	""	"YOR080W"	8230	26220	80	8095	7694	4053	97	102	43	100	100	0	6789	7257	3214	87	95	33	100	100	0	0	0	0	0	0	0	0	0	0	0	0	0	0	0	0	0	0	0	1.193	1.060	1.013	0.948	1.750	1.110	0.865	0.000	0.000	0.000	0.000	0.000	0.000	0.000	0.000	0.000	0.000	0.000	0.000	0.000	0.000	52	316	14700	14767	0.255	Error	Error	7998	6702	0	0	7597	7170	0	0	0	0
2	12	9	""	"YOR112W"	8430	26220	80	8254	7145	3787	96	99	39	100	100	0	8576	7818	3305	91	96	36	100	100	0	0	0	0	0	0	0	0	0	0	0	0	0	0	0	0	0	0	0	0.961	0.912	0.897	0.786	1.739	0.942	0.879	0.000	0.000	0.000	0.000	0.000	0.000	0.000	0.000	0.000	0.000	0.000	0.000	0.000	0.000	52	340	16643	14776	-0.057	Error	Error	8158	8485	0	0	7049	7727	0	0	0	0
2	13	9	"PHO85"	"YPL031C"	8630	26220	80	2312	2250	924	95	99	40	100	100	0	5725	5517	1643	90	96	43	100	100	0	0	0	0	0	0	0	0	0	0	0	0	0	0	0	0	0	0	0	0.393	0.397	0.402	0.365	1.516	0.403	0.899	0.000	0.000	0.000	0.000	0.000	0.000	0.000	0.000	0.000	0.000	0.000	0.000	0.000	0.000	52	340	7852	7582	-1.346	Error	Error	2217	5635	0	0	2155	5427	0	0	0	0
2	14	9	""	"YPL063W"	8830	26210	70	1093	1835	1521	95	100	40	100	100	0	2619	3581	2184	89	95	29	100	100	0	0	0	0	0	0	0	0	0	0	0	0	0	0	0	0	0	0	0	0.394	0.498	0.464	0.416	1.692	0.555	0.854	0.000	0.000	0.000	0.000	0.000	0.000	0.000	0.000	0.000	0.000	0.000	0.000	0.000	0.000	32	236	3528	5232	-1.342	Error	Error	998	2530	0	0	1740	3492	0	0	0	0
2	15	9	""	"YPL095C"	9040	26220	70	2251	3907	3862	95	101	48	100	96	0	4620	4947	3646	95	99	33	100	100	0	0	0	0	0	0	0	0	0	0	0	0	0	0	0	0	0	0	0	0.476	0.786	0.623	0.585	1.776	0.909	0.880	0.000	0.000	0.000	0.000	0.000	0.000	0.000	0.000	0.000	0.000	0.000	0.000	0.000	0.000	32	236	6681	8664	-1.070	Error	Error	2156	4525	0	0	3812	4852	0	0	0	0
2	16	9	""	"YPL033C"	9240	26220	80	5036	4765	2152	99	104	51	100	98	0	2739	2675	921	97	103	45	100	100	0	0	0	0	0	0	0	0	0	0	0	0	0	0	0	0	0	0	0	1.869	1.810	1.807	1.595	1.828	2.000	0.845	0.000	0.000	0.000	0.000	0.000	0.000	0.000	0.000	0.000	0.000	0.000	0.000	0.000	0.000	52	340	7579	7244	0.902	Error	Error	4937	2642	0	0	4666	2578	0	0	0	0
2	17	9	"VPS28"	"YPL065W"	9430	26210	80	4428	3996	1737	96	100	43	100	100	0	4753	4286	1773	98	104	46	100	100	0	0	0	0	0	0	0	0	0	0	0	0	0	0	0	0	0	0	0	0.931	0.931	0.922	0.912	1.930	0.920	0.868	0.000	0.000	0.000	0.000	0.000	0.000	0.000	0.000	0.000	0.000	0.000	0.000	0.000	0.000	52	340	8987	8088	-0.104	Error	Error	4332	4655	0	0	3900	4188	0	0	0	0
2	18	9	"MSY1"	"YPL097W"	9630	26210	70	5799	5263	2889	89	101	48	100	100	0	7373	6887	2835	100	118	163	100	100	0	0	0	0	0	0	0	0	0	0	0	0	0	0	0	0	0	0	0	0.785	0.762	0.801	0.670	1.654	0.777	0.875	0.000	0.000	0.000	0.000	0.000	0.000	0.000	0.000	0.000	0.000	0.000	0.000	0.000	0.000	32	236	12983	11961	-0.349	Error	Error	5710	7273	0	0	5174	6787	0	0	0	0
2	19	9	""	"YPL035C"	9860	26220	80	391	620	630	100	105	45	88	69	0	561	698	491	101	108	65	98	98	0	0	0	0	0	0	0	0	0	0	0	0	0	0	0	0	0	0	0	0.633	0.871	0.635	0.533	2.686	1.123	0.711	0.000	0.000	0.000	0.000	0.000	0.000	0.000	0.000	0.000	0.000	0.000	0.000	0.000	0.000	52	340	751	1117	-0.661	Error	Error	291	460	0	0	520	597	0	0	0	0
2	20	9	""	"YPL067C"	10040	26210	80	893	790	400	100	101	44	96	92	0	729	757	380	101	106	38	98	96	0	0	0	0	0	0	0	0	0	0	0	0	0	0	0	0	0	0	0	1.263	1.052	0.996	0.899	2.517	1.064	0.773	0.000	0.000	0.000	0.000	0.000	0.000	0.000	0.000	0.000	0.000	0.000	0.000	0.000	0.000	52	340	1421	1346	0.337	Error	Error	793	628	0	0	690	656	0	0	0	0
2	21	9	""	"YPL099C"	10250	26200	70	2162	1965	895	105	110	57	93	93	0	2489	2212	1017	106	114	41	100	100	0	0	0	0	0	0	0	0	0	0	0	0	0	0	0	0	0	0	0	0.863	0.883	0.864	0.812	2.027	0.861	0.817	0.000	0.000	0.000	0.000	0.000	0.000	0.000	0.000	0.000	0.000	0.000	0.000	0.000	0.000	32	236	4440	3966	-0.212	Error	Error	2057	2383	0	0	1860	2106	0	0	0	0
2	1	10	"EGD1"	"YPL037C"	6230	26430	70	3900	3650	1842	93	100	54	100	100	0	5341	5050	1968	75	84	54	100	100	0	0	0	0	0	0	0	0	0	0	0	0	0	0	0	0	0	0	0	0.723	0.715	0.700	0.639	1.547	0.738	0.865	0.000	0.000	0.000	0.000	0.000	0.000	0.000	0.000	0.000	0.000	0.000	0.000	0.000	0.000	32	220	9073	8532	-0.468	Error	Error	3807	5266	0	0	3557	4975	0	0	0	0
2	2	10	"BTS1"	"YPL069C"	6450	26430	90	10764	11522	7244	95	103	51	100	100	0	5444	5654	3103	74	81	42	100	100	0	0	0	0	0	0	0	0	0	0	0	0	0	0	0	0	0	0	0	1.987	2.048	2.018	1.897	2.251	2.191	0.862	0.000	0.000	0.000	0.000	0.000	0.000	0.000	0.000	0.000	0.000	0.000	0.000	0.000	0.000	52	414	16039	17007	0.990	Error	Error	10669	5370	0	0	11427	5580	0	0	0	0
2	3	10	""	"YPL101W"	6650	26440	100	5216	5243	2763	95	98	40	98	98	0	10494	10037	4017	74	80	31	100	100	0	0	0	0	0	0	0	0	0	0	0	0	0	0	0	0	0	0	0	0.491	0.517	0.520	0.462	1.767	0.538	0.910	0.000	0.000	0.000	0.000	0.000	0.000	0.000	0.000	0.000	0.000	0.000	0.000	0.000	0.000	80	513	15541	15111	-1.025	Error	Error	5121	10420	0	0	5148	9963	0	0	0	0
2	4	10	"RPS23B"	"YPR132W"	6840	26440	90	4292	4950	4282	91	97	44	92	90	0	5551	4842	3770	76	81	33	100	98	0	0	0	0	0	0	0	0	0	0	0	0	0	0	0	0	0	0	0	0.767	1.020	0.764	0.754	3.097	1.074	0.802	0.000	0.000	0.000	0.000	0.000	0.000	0.000	0.000	0.000	0.000	0.000	0.000	0.000	0.000	52	414	9676	9625	-0.382	Error	Error	4201	5475	0	0	4859	4766	0	0	0	0
2	5	10	"KIM3"	"YPR164W"	7040	26420	50	149	139	49	87	90	40	58	25	0	138	185	94	80	80	24	83	58	0	0	0	0	0	0	0	0	0	0	0	0	0	0	0	0	0	0	0	1.069	0.495	1.015	0.970	4.679	0.409	0.124	0.000	0.000	0.000	0.000	0.000	0.000	0.000	0.000	0.000	0.000	0.000	0.000	0.000	0.000	12	104	120	157	0.096	Error	Error	62	58	0	0	52	105	0	0	0	0
2	6	10	""	"YPR196W"	7230	26430	110	5998	5956	3630	92	110	217	97	95	0	8574	8614	4412	76	91	175	95	92	0	0	0	0	0	0	0	0	0	0	0	0	0	0	0	0	0	0	0	0.695	0.687	0.685	0.707	2.279	0.706	0.848	0.000	0.000	0.000	0.000	0.000	0.000	0.000	0.000	0.000	0.000	0.000	0.000	0.000	0.000	80	615	14404	14402	-0.525	Error	Error	5906	8498	0	0	5864	8538	0	0	0	0
2	7	10	"MSS18"	"YPR134W"	7440	26430	80	1784	2362	1676	91	95	37	98	98	0	4060	4412	2375	75	80	27	100	100	0	0	0	0	0	0	0	0	0	0	0	0	0	0	0	0	0	0	0	0.425	0.524	0.500	0.463	1.828	0.562	0.869	0.000	0.000	0.000	0.000	0.000	0.000	0.000	0.000	0.000	0.000	0.000	0.000	0.000	0.000	52	340	5678	6608	-1.235	Error	Error	1693	3985	0	0	2271	4337	0	0	0	0
2	8	10	"MRP2"	"YPR166C"	7630	26420	70	427	589	438	88	96	43	93	84	0	411	553	357	78	83	28	96	96	0	0	0	0	0	0	0	0	0	0	0	0	0	0	0	0	0	0	0	1.018	1.055	1.035	0.936	2.256	1.155	0.664	0.000	0.000	0.000	0.000	0.000	0.000	0.000	0.000	0.000	0.000	0.000	0.000	0.000	0.000	32	236	672	976	0.026	Error	Error	339	333	0	0	501	475	0	0	0	0
2	9	10	"SGE1"	"YPR198W"	7840	26420	80	4204	5562	5035	93	98	41	100	100	0	3351	4250	3357	80	84	24	100	98	0	0	0	0	0	0	0	0	0	0	0	0	0	0	0	0	0	0	0	1.257	1.312	1.133	1.194	2.432	1.449	0.819	0.000	0.000	0.000	0.000	0.000	0.000	0.000	0.000	0.000	0.000	0.000	0.000	0.000	0.000	52	340	7382	9639	0.330	Error	Error	4111	3271	0	0	5469	4170	0	0	0	0
2	10	10	""	"YPR136C"	8030	26430	70	155	144	57	89	98	42	62	34	0	170	195	87	79	87	33	93	75	0	0	0	0	0	0	0	0	0	0	0	0	0	0	0	0	0	0	0	0.725	0.474	0.680	0.606	2.430	0.455	0.190	0.000	0.000	0.000	0.000	0.000	0.000	0.000	0.000	0.000	0.000	0.000	0.000	0.000	0.000	32	236	157	171	-0.463	Error	Error	66	91	0	0	55	116	0	0	0	0
2	11	10	"NUT2"	"YPR168W"	8240	26430	60	111	125	53	92	94	37	40	28	0	206	232	129	86	90	35	78	65	0	0	0	0	0	0	0	0	0	0	0	0	0	0	0	0	0	0	0	0.158	0.226	0.288	0.285	3.002	0.278	0.238	0.000	0.000	0.000	0.000	0.000	0.000	0.000	0.000	0.000	0.000	0.000	0.000	0.000	0.000	32	176	139	179	-2.659	Error	Error	19	120	0	0	33	146	0	0	0	0
2	12	10	"ARR2"	"YPR200C"	8450	26420	80	579	640	437	95	97	38	92	84	0	1006	1125	784	84	87	25	100	98	0	0	0	0	0	0	0	0	0	0	0	0	0	0	0	0	0	0	0	0.525	0.524	0.506	0.483	2.571	0.502	0.770	0.000	0.000	0.000	0.000	0.000	0.000	0.000	0.000	0.000	0.000	0.000	0.000	0.000	0.000	52	340	1406	1586	-0.930	Error	Error	484	922	0	0	545	1041	0	0	0	0
2	13	10	"MEP3"	"YPR138C"	8650	26420	80	2425	2287	1297	91	98	40	100	98	0	5016	5260	2485	84	88	27	100	100	0	0	0	0	0	0	0	0	0	0	0	0	0	0	0	0	0	0	0	0.473	0.424	0.391	0.349	2.070	0.418	0.812	0.000	0.000	0.000	0.000	0.000	0.000	0.000	0.000	0.000	0.000	0.000	0.000	0.000	0.000	52	340	7266	7372	-1.079	Error	Error	2334	4932	0	0	2196	5176	0	0	0	0
2	14	10	""	"YPR170C"	8830	26410	70	823	824	476	92	99	43	96	96	0	1132	1290	610	93	95	28	100	100	0	0	0	0	0	0	0	0	0	0	0	0	0	0	0	0	0	0	0	0.704	0.612	0.557	0.483	2.460	0.606	0.651	0.000	0.000	0.000	0.000	0.000	0.000	0.000	0.000	0.000	0.000	0.000	0.000	0.000	0.000	32	236	1770	1929	-0.507	Error	Error	731	1039	0	0	732	1197	0	0	0	0
2	15	10	""	"YPR202W"	9050	26410	80	4137	5954	5236	96	104	41	100	100	0	8087	10359	7213	92	95	25	100	100	0	0	0	0	0	0	0	0	0	0	0	0	0	0	0	0	0	0	0	0.505	0.571	0.518	0.487	2.398	0.598	0.761	0.000	0.000	0.000	0.000	0.000	0.000	0.000	0.000	0.000	0.000	0.000	0.000	0.000	0.000	52	340	12036	16125	-0.984	Error	Error	4041	7995	0	0	5858	10267	0	0	0	0
2	16	10	""	"IntYBR048W"	9230	26410	70	2331	2622	1757	95	97	37	100	100	0	2248	2533	1239	95	100	32	100	100	0	0	0	0	0	0	0	0	0	0	0	0	0	0	0	0	0	0	0	1.039	1.037	0.924	0.930	1.651	1.147	0.879	0.000	0.000	0.000	0.000	0.000	0.000	0.000	0.000	0.000	0.000	0.000	0.000	0.000	0.000	32	236	4389	4965	0.055	Error	Error	2236	2153	0	0	2527	2438	0	0	0	0
2	17	10	""	"LSR1"	9450	26420	70	682	1037	885	97	103	44	100	96	0	1852	2209	1076	101	106	32	100	100	0	0	0	0	0	0	0	0	0	0	0	0	0	0	0	0	0	0	0	0.334	0.446	0.354	0.319	2.038	0.522	0.767	0.000	0.000	0.000	0.000	0.000	0.000	0.000	0.000	0.000	0.000	0.000	0.000	0.000	0.000	32	236	2336	3048	-1.582	Error	Error	585	1751	0	0	940	2108	0	0	0	0
2	18	10	""	"YCLWTy5-1C"	9640	26420	70	987	1242	873	96	103	45	96	96	0	3187	3436	1753	99	104	27	100	100	0	0	0	0	0	0	0	0	0	0	0	0	0	0	0	0	0	0	0	0.289	0.343	0.335	0.258	2.030	0.366	0.855	0.000	0.000	0.000	0.000	0.000	0.000	0.000	0.000	0.000	0.000	0.000	0.000	0.000	0.000	32	236	3979	4483	-1.793	Error	Error	891	3088	0	0	1146	3337	0	0	0	0
2	19	10	""	"IntYCR097W-A2"	9830	26410	70	157	166	61	105	109	45	53	31	0	247	274	110	102	109	63	90	62	0	0	0	0	0	0	0	0	0	0	0	0	0	0	0	0	0	0	0	0.359	0.355	0.309	0.402	4.139	0.382	0.233	0.000	0.000	0.000	0.000	0.000	0.000	0.000	0.000	0.000	0.000	0.000	0.000	0.000	0.000	32	236	197	233	-1.479	Error	Error	52	145	0	0	61	172	0	0	0	0
2	20	10	""	"IntYDL191W"	10060	26420	60	131	128	40	98	100	41	40	3	0	197	218	93	103	107	24	90	84	0	0	0	0	0	0	0	0	0	0	0	0	0	0	0	0	0	0	0	0.351	0.261	0.535	0.403	2.960	0.170	0.060	0.000	0.000	0.000	0.000	0.000	0.000	0.000	0.000	0.000	0.000	0.000	0.000	0.000	0.000	32	176	127	145	-1.510	Error	Error	33	94	0	0	30	115	0	0	0	0
2	21	10	""	"CEN4"	10270	26420	90	293	299	143	101	105	42	86	71	0	337	335	123	105	110	30	96	88	0	0	0	0	0	0	0	0	0	0	0	0	0	0	0	0	0	0	0	0.828	0.861	0.873	0.713	2.572	0.987	0.556	0.000	0.000	0.000	0.000	0.000	0.000	0.000	0.000	0.000	0.000	0.000	0.000	0.000	0.000	52	412	424	428	-0.273	Error	Error	192	232	0	0	198	230	0	0	0	0
2	1	11	""	"YDRWdelta31"	6250	26620	150	103	103	38	89	96	44	21	3	0	83	97	48	71	76	34	28	13	0	0	0	0	0	0	0	0	0	0	0	0	0	0	0	0	0	0	0	1.167	0.538	1.000	1.073	4.100	2.235	0.031	0.000	0.000	0.000	0.000	0.000	0.000	0.000	0.000	0.000	0.000	0.000	0.000	0.000	0.000	156	1063	26	40	0.222	Error	Error	14	12	0	0	14	26	0	0	-50	0
2	2	11	""	"YELCtau1"	6450	26640	80	388	749	973	97	99	45	88	78	0	362	582	587	70	74	24	100	100	0	0	0	0	0	0	0	0	0	0	0	0	0	0	0	0	0	0	0	0.997	1.273	1.022	0.904	2.529	1.612	0.799	0.000	0.000	0.000	0.000	0.000	0.000	0.000	0.000	0.000	0.000	0.000	0.000	0.000	0.000	52	335	583	1164	-0.005	Error	Error	291	292	0	0	652	512	0	0	0	0
2	3	11	""	"YER039C-A"	6650	26630	90	815	1264	1187	93	97	40	98	96	0	2133	2814	2234	72	78	29	100	100	0	0	0	0	0	0	0	0	0	0	0	0	0	0	0	0	0	0	0	0.350	0.427	0.375	0.337	1.949	0.462	0.893	0.000	0.000	0.000	0.000	0.000	0.000	0.000	0.000	0.000	0.000	0.000	0.000	0.000	0.000	52	414	2783	3913	-1.513	Error	Error	722	2061	0	0	1171	2742	0	0	0	0
2	4	11	""	"YFLWtau1"	6840	26630	90	5257	6985	5728	96	101	41	100	100	0	1622	2217	1456	76	82	39	100	100	0	0	0	0	0	0	0	0	0	0	0	0	0	0	0	0	0	0	0	3.338	3.218	3.294	2.971	1.631	3.696	0.870	0.000	0.000	0.000	0.000	0.000	0.000	0.000	0.000	0.000	0.000	0.000	0.000	0.000	0.000	52	420	6707	9030	1.739	Error	Error	5161	1546	0	0	6889	2141	0	0	0	0
2	5	11	""	"YFRCdelta9"	7040	26630	80	379	698	781	92	94	38	92	82	0	507	967	994	77	81	36	100	100	0	0	0	0	0	0	0	0	0	0	0	0	0	0	0	0	0	0	0	0.667	0.681	0.574	0.512	2.168	0.732	0.885	0.000	0.000	0.000	0.000	0.000	0.000	0.000	0.000	0.000	0.000	0.000	0.000	0.000	0.000	52	340	717	1496	-0.583	Error	Error	287	430	0	0	606	890	0	0	0	0
2	6	11	""	"YGLWtau2"	7240	26620	70	250	414	403	97	103	44	75	53	0	310	585	505	78	85	32	100	93	0	0	0	0	0	0	0	0	0	0	0	0	0	0	0	0	0	0	0	0.659	0.625	0.623	0.451	3.248	0.714	0.818	0.000	0.000	0.000	0.000	0.000	0.000	0.000	0.000	0.000	0.000	0.000	0.000	0.000	0.000	32	236	385	824	-0.601	Error	Error	153	232	0	0	317	507	0	0	0	0
2	7	11	""	"iYAR061W"	7440	26630	80	1300	3803	4659	90	97	44	100	98	0	3214	4569	4093	78	82	25	100	98	0	0	0	0	0	0	0	0	0	0	0	0	0	0	0	0	0	0	0	0.386	0.827	0.721	0.580	2.225	1.003	0.885	0.000	0.000	0.000	0.000	0.000	0.000	0.000	0.000	0.000	0.000	0.000	0.000	0.000	0.000	52	340	4346	8204	-1.374	Error	Error	1210	3136	0	0	3713	4491	0	0	0	0
2	8	11	""	"iYAR068W"	7650	26640	80	507	1485	2195	84	94	43	98	90	0	1439	2697	2924	82	87	31	100	100	0	0	0	0	0	0	0	0	0	0	0	0	0	0	0	0	0	0	0	0.312	0.536	0.394	0.326	2.546	0.640	0.745	0.000	0.000	0.000	0.000	0.000	0.000	0.000	0.000	0.000	0.000	0.000	0.000	0.000	0.000	52	340	1780	4016	-1.682	Error	Error	423	1357	0	0	1401	2615	0	0	0	0
2	9	11	""	"iYBL111C"	7840	26630	90	2421	6422	8566	90	97	43	100	100	0	5554	10786	11741	81	86	27	100	100	0	0	0	0	0	0	0	0	0	0	0	0	0	0	0	0	0	0	0	0.426	0.591	0.503	0.429	2.045	0.655	0.833	0.000	0.000	0.000	0.000	0.000	0.000	0.000	0.000	0.000	0.000	0.000	0.000	0.000	0.000	52	420	7804	17037	-1.231	Error	Error	2331	5473	0	0	6332	10705	0	0	0	0
2	10	11	""	"iYBL098W"	8050	26630	80	259	423	361	97	104	40	88	71	0	826	1029	773	82	85	26	100	96	0	0	0	0	0	0	0	0	0	0	0	0	0	0	0	0	0	0	0	0.218	0.344	0.268	0.269	2.751	0.356	0.680	0.000	0.000	0.000	0.000	0.000	0.000	0.000	0.000	0.000	0.000	0.000	0.000	0.000	0.000	52	340	906	1273	-2.199	Error	Error	162	744	0	0	326	947	0	0	0	0
2	11	11	""	"iYBL092W"	8230	26620	70	302	380	258	88	96	40	87	78	0	488	549	305	86	92	32	96	93	0	0	0	0	0	0	0	0	0	0	0	0	0	0	0	0	0	0	0	0.532	0.631	0.639	0.530	2.518	0.681	0.636	0.000	0.000	0.000	0.000	0.000	0.000	0.000	0.000	0.000	0.000	0.000	0.000	0.000	0.000	32	236	616	755	-0.910	Error	Error	214	402	0	0	292	463	0	0	0	0
2	12	11	""	"iYBL089W"	8430	26620	80	302	640	985	95	99	37	96	78	0	530	996	1237	84	87	26	98	98	0	0	0	0	0	0	0	0	0	0	0	0	0	0	0	0	0	0	0	0.464	0.598	0.493	0.447	2.229	0.720	0.795	0.000	0.000	0.000	0.000	0.000	0.000	0.000	0.000	0.000	0.000	0.000	0.000	0.000	0.000	52	340	653	1457	-1.107	Error	Error	207	446	0	0	545	912	0	0	0	0
2	13	11	""	"iYBL071C"	8630	26620	70	335	436	345	105	105	42	71	65	0	462	721	528	88	91	24	100	100	0	0	0	0	0	0	0	0	0	0	0	0	0	0	0	0	0	0	0	0.615	0.523	0.524	0.387	2.709	0.566	0.823	0.000	0.000	0.000	0.000	0.000	0.000	0.000	0.000	0.000	0.000	0.000	0.000	0.000	0.000	32	236	604	964	-0.701	Error	Error	230	374	0	0	331	633	0	0	0	0
2	14	11	""	"iYBL065W"	8830	26610	50	171	180	72	96	103	44	66	33	0	437	464	159	94	99	33	100	100	0	0	0	0	0	0	0	0	0	0	0	0	0	0	0	0	0	0	0	0.219	0.227	0.211	0.211	2.158	0.188	0.185	0.000	0.000	0.000	0.000	0.000	0.000	0.000	0.000	0.000	0.000	0.000	0.000	0.000	0.000	12	104	418	454	-2.193	Error	Error	75	343	0	0	84	370	0	0	0	0
2	15	11	""	"iYBL060W"	9040	26620	80	470	1110	1231	96	100	40	94	92	0	1105	1983	1793	90	94	25	100	100	0	0	0	0	0	0	0	0	0	0	0	0	0	0	0	0	0	0	0	0.368	0.536	0.468	0.405	1.967	0.608	0.897	0.000	0.000	0.000	0.000	0.000	0.000	0.000	0.000	0.000	0.000	0.000	0.000	0.000	0.000	52	340	1389	2907	-1.440	Error	Error	374	1015	0	0	1014	1893	0	0	0	0
2	16	11	""	"iYBL042C"	9240	26620	80	672	1171	1098	94	99	42	96	96	0	1841	2341	1563	93	95	25	100	100	0	0	0	0	0	0	0	0	0	0	0	0	0	0	0	0	0	0	0	0.331	0.479	0.343	0.378	2.084	0.553	0.843	0.000	0.000	0.000	0.000	0.000	0.000	0.000	0.000	0.000	0.000	0.000	0.000	0.000	0.000	52	340	2326	3325	-1.597	Error	Error	578	1748	0	0	1077	2248	0	0	0	0
2	17	11	""	"iYBL038W"	9460	26630	80	349	782	930	91	102	49	88	78	0	845	1499	1453	97	102	41	100	100	0	0	0	0	0	0	0	0	0	0	0	0	0	0	0	0	0	0	0	0.345	0.493	0.386	0.321	2.955	0.557	0.835	0.000	0.000	0.000	0.000	0.000	0.000	0.000	0.000	0.000	0.000	0.000	0.000	0.000	0.000	52	340	1006	2093	-1.536	Error	Error	258	748	0	0	691	1402	0	0	0	0
2	18	11	""	"iYBL034C"	9660	26630	80	202	379	440	92	99	40	75	63	0	552	811	669	96	99	24	100	100	0	0	0	0	0	0	0	0	0	0	0	0	0	0	0	0	0	0	0	0.241	0.401	0.301	0.232	3.133	0.520	0.767	0.000	0.000	0.000	0.000	0.000	0.000	0.000	0.000	0.000	0.000	0.000	0.000	0.000	0.000	52	340	566	1002	-2.052	Error	Error	110	456	0	0	287	715	0	0	0	0
2	19	11	""	"iYBR265W"	9850	26620	90	419	600	489	97	99	40	96	92	0	772	904	537	99	102	25	100	100	0	0	0	0	0	0	0	0	0	0	0	0	0	0	0	0	0	0	0	0.478	0.625	0.613	0.537	1.665	0.721	0.801	0.000	0.000	0.000	0.000	0.000	0.000	0.000	0.000	0.000	0.000	0.000	0.000	0.000	0.000	52	420	995	1308	-1.064	Error	Error	322	673	0	0	503	805	0	0	0	0
2	20	11	""	"iYBR270C"	10050	26610	70	1019	1613	1478	96	101	45	100	96	0	1973	2390	1568	105	108	28	100	100	0	0	0	0	0	0	0	0	0	0	0	0	0	0	0	0	0	0	0	0.494	0.664	0.559	0.521	2.015	0.760	0.819	0.000	0.000	0.000	0.000	0.000	0.000	0.000	0.000	0.000	0.000	0.000	0.000	0.000	0.000	32	236	2791	3802	-1.017	Error	Error	923	1868	0	0	1517	2285	0	0	0	0
2	21	11	""	"iYBR274W"	10250	26620	80	296	476	400	100	104	40	88	78	0	386	489	272	106	108	29	100	100	0	0	0	0	0	0	0	0	0	0	0	0	0	0	0	0	0	0	0	0.700	0.982	0.860	0.748	2.216	1.215	0.747	0.000	0.000	0.000	0.000	0.000	0.000	0.000	0.000	0.000	0.000	0.000	0.000	0.000	0.000	52	340	476	759	-0.515	Error	Error	196	280	0	0	376	383	0	0	0	0
2	1	12	""	"iYBR291C"	6240	26840	80	448	1197	1504	89	95	41	98	92	0	622	1209	1246	73	77	24	100	98	0	0	0	0	0	0	0	0	0	0	0	0	0	0	0	0	0	0	0	0.654	0.975	0.798	0.760	2.021	1.130	0.895	0.000	0.000	0.000	0.000	0.000	0.000	0.000	0.000	0.000	0.000	0.000	0.000	0.000	0.000	52	320	908	2244	-0.613	Error	Error	359	549	0	0	1108	1136	0	0	0	0
2	2	12	""	"iYBR294W"	6440	26830	70	1967	2325	1566	91	95	40	96	96	0	4821	4170	2204	76	81	28	100	100	0	0	0	0	0	0	0	0	0	0	0	0	0	0	0	0	0	0	0	0.395	0.546	0.514	0.511	1.649	0.577	0.881	0.000	0.000	0.000	0.000	0.000	0.000	0.000	0.000	0.000	0.000	0.000	0.000	0.000	0.000	32	236	6621	6328	-1.339	Error	Error	1876	4745	0	0	2234	4094	0	0	0	0
2	3	12	""	"iYBR297W"	6640	26830	90	1354	2207	1938	96	98	47	100	100	0	1587	1972	1442	75	83	86	100	100	0	0	0	0	0	0	0	0	0	0	0	0	0	0	0	0	0	0	0	0.832	1.113	1.146	1.051	1.809	1.231	0.882	0.000	0.000	0.000	0.000	0.000	0.000	0.000	0.000	0.000	0.000	0.000	0.000	0.000	0.000	52	420	2770	4008	-0.265	Error	Error	1258	1512	0	0	2111	1897	0	0	0	0
2	4	12	""	"iYCL061C"	6840	26840	80	3053	4194	3728	96	100	40	100	100	0	6445	7553	4647	79	83	31	100	100	0	0	0	0	0	0	0	0	0	0	0	0	0	0	0	0	0	0	0	0.464	0.548	0.388	0.422	2.152	0.622	0.838	0.000	0.000	0.000	0.000	0.000	0.000	0.000	0.000	0.000	0.000	0.000	0.000	0.000	0.000	52	340	9323	11572	-1.106	Error	Error	2957	6366	0	0	4098	7474	0	0	0	0
2	5	12	""	"iYCL055W-0"	7050	26840	90	858	1377	1284	94	98	43	100	98	0	1920	2306	1634	80	89	107	100	94	0	0	0	0	0	0	0	0	0	0	0	0	0	0	0	0	0	0	0	0.415	0.576	0.531	0.508	2.192	0.639	0.811	0.000	0.000	0.000	0.000	0.000	0.000	0.000	0.000	0.000	0.000	0.000	0.000	0.000	0.000	52	420	2604	3509	-1.268	Error	Error	764	1840	0	0	1283	2226	0	0	0	0
2	6	12	""	"iYCL051W"	7230	26830	70	1040	1127	786	91	95	37	100	100	0	1065	1056	580	77	83	32	100	100	0	0	0	0	0	0	0	0	0	0	0	0	0	0	0	0	0	0	0	0.961	1.058	1.019	0.923	1.843	1.173	0.832	0.000	0.000	0.000	0.000	0.000	0.000	0.000	0.000	0.000	0.000	0.000	0.000	0.000	0.000	32	236	1937	2015	-0.058	Error	Error	949	988	0	0	1036	979	0	0	0	0
2	7	12	""	"iYCL029C"	7440	26830	80	717	1033	807	90	95	41	100	94	0	1916	2183	1187	81	86	30	100	100	0	0	0	0	0	0	0	0	0	0	0	0	0	0	0	0	0	0	0	0.342	0.449	0.404	0.356	2.118	0.496	0.809	0.000	0.000	0.000	0.000	0.000	0.000	0.000	0.000	0.000	0.000	0.000	0.000	0.000	0.000	52	340	2462	3045	-1.549	Error	Error	627	1835	0	0	943	2102	0	0	0	0
2	8	12	""	"iYCL025C"	7650	26840	100	437	535	385	93	97	41	96	88	0	2081	2360	1486	83	88	33	100	100	0	0	0	0	0	0	0	0	0	0	0	0	0	0	0	0	0	0	0	0.172	0.194	0.192	0.168	1.844	0.202	0.827	0.000	0.000	0.000	0.000	0.000	0.000	0.000	0.000	0.000	0.000	0.000	0.000	0.000	0.000	80	541	2342	2719	-2.538	Error	Error	344	1998	0	0	442	2277	0	0	0	0
2	9	12	""	"iYCRCdelta6-0"	7860	26840	90	444	924	1104	95	97	39	92	88	0	1000	1413	1169	80	85	28	100	100	0	0	0	0	0	0	0	0	0	0	0	0	0	0	0	0	0	0	0	0.379	0.622	0.438	0.408	2.317	0.785	0.844	0.000	0.000	0.000	0.000	0.000	0.000	0.000	0.000	0.000	0.000	0.000	0.000	0.000	0.000	52	420	1269	2162	-1.398	Error	Error	349	920	0	0	829	1333	0	0	0	0
2	10	12	""	"iYDL043C"	8050	26830	90	569	616	354	95	99	40	96	94	0	795	964	434	82	87	29	100	100	0	0	0	0	0	0	0	0	0	0	0	0	0	0	0	0	0	0	0	0.665	0.591	0.556	0.498	1.957	0.632	0.775	0.000	0.000	0.000	0.000	0.000	0.000	0.000	0.000	0.000	0.000	0.000	0.000	0.000	0.000	52	420	1187	1403	-0.589	Error	Error	474	713	0	0	521	882	0	0	0	0
2	11	12	""	"iYDL037C-0"	8240	26830	90	671	1579	1965	90	98	41	94	92	0	971	1827	1830	81	85	26	100	100	0	0	0	0	0	0	0	0	0	0	0	0	0	0	0	0	0	0	0	0.653	0.853	0.680	0.605	2.690	0.987	0.890	0.000	0.000	0.000	0.000	0.000	0.000	0.000	0.000	0.000	0.000	0.000	0.000	0.000	0.000	52	420	1471	3235	-0.615	Error	Error	581	890	0	0	1489	1746	0	0	0	0
2	12	12	""	"iYDL032W"	8450	26830	100	399	424	226	94	99	43	87	83	0	997	1048	558	89	92	30	97	96	0	0	0	0	0	0	0	0	0	0	0	0	0	0	0	0	0	0	0	0.336	0.344	0.329	0.363	2.173	0.325	0.715	0.000	0.000	0.000	0.000	0.000	0.000	0.000	0.000	0.000	0.000	0.000	0.000	0.000	0.000	80	546	1213	1289	-1.574	Error	Error	305	908	0	0	330	959	0	0	0	0
2	13	12	""	"iYDL014W"	8660	26830	80	763	1090	974	98	100	41	92	90	0	1401	1827	1231	92	96	30	100	100	0	0	0	0	0	0	0	0	0	0	0	0	0	0	0	0	0	0	0	0.508	0.572	0.531	0.406	2.694	0.650	0.837	0.000	0.000	0.000	0.000	0.000	0.000	0.000	0.000	0.000	0.000	0.000	0.000	0.000	0.000	52	340	1974	2727	-0.977	Error	Error	665	1309	0	0	992	1735	0	0	0	0
2	14	12	""	"iYDL008W"	8850	26820	90	791	1051	790	102	104	45	98	94	0	1050	1273	671	97	102	35	100	100	0	0	0	0	0	0	0	0	0	0	0	0	0	0	0	0	0	0	0	0.723	0.807	0.824	0.614	2.242	0.948	0.801	0.000	0.000	0.000	0.000	0.000	0.000	0.000	0.000	0.000	0.000	0.000	0.000	0.000	0.000	52	420	1642	2125	-0.468	Error	Error	689	953	0	0	949	1176	0	0	0	0
2	15	12	""	"iYDLWtau1"	9040	26830	80	524	581	348	101	104	41	94	90	0	748	847	352	100	103	29	100	100	0	0	0	0	0	0	0	0	0	0	0	0	0	0	0	0	0	0	0	0.653	0.643	0.677	0.554	2.002	0.745	0.764	0.000	0.000	0.000	0.000	0.000	0.000	0.000	0.000	0.000	0.000	0.000	0.000	0.000	0.000	52	340	1071	1227	-0.615	Error	Error	423	648	0	0	480	747	0	0	0	0
2	16	12	""	"iYDR008C"	9240	26820	90	784	1289	1064	97	103	44	98	94	0	1692	2386	1431	97	104	73	100	100	0	0	0	0	0	0	0	0	0	0	0	0	0	0	0	0	0	0	0	0.431	0.521	0.463	0.398	2.262	0.581	0.842	0.000	0.000	0.000	0.000	0.000	0.000	0.000	0.000	0.000	0.000	0.000	0.000	0.000	0.000	52	420	2282	3481	-1.215	Error	Error	687	1595	0	0	1192	2289	0	0	0	0
2	17	12	""	"iYDR013W"	9440	26820	80	279	657	1012	92	99	43	90	75	0	380	559	596	99	105	46	100	92	0	0	0	0	0	0	0	0	0	0	0	0	0	0	0	0	0	0	0	0.665	1.228	0.923	0.834	2.503	1.639	0.793	0.000	0.000	0.000	0.000	0.000	0.000	0.000	0.000	0.000	0.000	0.000	0.000	0.000	0.000	52	340	468	1025	-0.588	Error	Error	187	281	0	0	565	460	0	0	0	0
2	18	12	""	"iYDR016C"	9650	26820	90	982	1878	1963	95	101	44	100	100	0	1101	1495	1194	101	104	26	100	100	0	0	0	0	0	0	0	0	0	0	0	0	0	0	0	0	0	0	0	0.887	1.279	1.231	1.014	2.173	1.508	0.852	0.000	0.000	0.000	0.000	0.000	0.000	0.000	0.000	0.000	0.000	0.000	0.000	0.000	0.000	52	420	1887	3177	-0.173	Error	Error	887	1000	0	0	1783	1394	0	0	0	0
2	19	12	""	"iYDR032C-0"	9850	26830	90	409	404	240	98	101	40	84	80	0	1131	1116	496	99	101	24	100	100	0	0	0	0	0	0	0	0	0	0	0	0	0	0	0	0	0	0	0	0.301	0.301	0.301	0.243	2.356	0.315	0.711	0.000	0.000	0.000	0.000	0.000	0.000	0.000	0.000	0.000	0.000	0.000	0.000	0.000	0.000	52	414	1343	1323	-1.730	Error	Error	311	1032	0	0	306	1017	0	0	0	0
2	20	12	""	"iYDR034C"	10040	26820	90	1796	1593	759	98	107	69	100	100	0	2729	2779	910	104	111	47	100	100	0	0	0	0	0	0	0	0	0	0	0	0	0	0	0	0	0	0	0	0.647	0.559	0.574	0.480	1.740	0.590	0.855	0.000	0.000	0.000	0.000	0.000	0.000	0.000	0.000	0.000	0.000	0.000	0.000	0.000	0.000	52	420	4323	4170	-0.628	Error	Error	1698	2625	0	0	1495	2675	0	0	0	0
2	21	12	""	"iYDR034C-A"	10240	26820	80	2651	2764	1467	96	102	43	100	100	0	2948	3295	1478	110	114	40	100	100	0	0	0	0	0	0	0	0	0	0	0	0	0	0	0	0	0	0	0	0.900	0.838	0.823	0.794	1.467	0.871	0.884	0.000	0.000	0.000	0.000	0.000	0.000	0.000	0.000	0.000	0.000	0.000	0.000	0.000	0.000	52	340	5393	5853	-0.152	Error	Error	2555	2838	0	0	2668	3185	0	0	0	0
2	1	13	""	"iYDR335W"	6270	27040	70	1896	2481	1654	89	98	62	96	93	0	2398	2322	1294	74	77	21	100	100	0	0	0	0	0	0	0	0	0	0	0	0	0	0	0	0	0	0	0	0.778	1.064	0.922	0.845	2.042	1.261	0.816	0.000	0.000	0.000	0.000	0.000	0.000	0.000	0.000	0.000	0.000	0.000	0.000	0.000	0.000	32	236	4131	4640	-0.363	Error	Error	1807	2324	0	0	2392	2248	0	0	0	0
2	2	13	""	"iYDR339C"	6460	27040	60	135	135	68	89	95	39	50	34	0	206	221	114	75	78	26	81	71	0	0	0	0	0	0	0	0	0	0	0	0	0	0	0	0	0	0	0	0.351	0.315	0.446	0.414	2.168	0.351	0.283	0.000	0.000	0.000	0.000	0.000	0.000	0.000	0.000	0.000	0.000	0.000	0.000	0.000	0.000	32	176	177	192	-1.510	Error	Error	46	131	0	0	46	146	0	0	0	0
2	3	13	""	"iYDR342C-1"	6650	27030	80	4404	4395	2130	88	95	42	100	100	0	7858	7413	2299	77	84	32	100	100	0	0	0	0	0	0	0	0	0	0	0	0	0	0	0	0	0	0	0	0.555	0.587	0.552	0.528	1.562	0.612	0.851	0.000	0.000	0.000	0.000	0.000	0.000	0.000	0.000	0.000	0.000	0.000	0.000	0.000	0.000	52	340	12097	11643	-0.850	Error	Error	4316	7781	0	0	4307	7336	0	0	0	0
2	4	13	""	"iYDR354W"	6850	27030	80	465	612	438	92	97	43	96	92	0	815	972	586	77	82	32	100	100	0	0	0	0	0	0	0	0	0	0	0	0	0	0	0	0	0	0	0	0.505	0.581	0.552	0.506	1.905	0.624	0.829	0.000	0.000	0.000	0.000	0.000	0.000	0.000	0.000	0.000	0.000	0.000	0.000	0.000	0.000	52	340	1111	1415	-0.984	Error	Error	373	738	0	0	520	895	0	0	0	0
2	5	13	""	"iYDR360W"	7050	27030	80	1651	1653	998	91	96	39	98	98	0	3574	3449	1625	75	85	117	100	100	0	0	0	0	0	0	0	0	0	0	0	0	0	0	0	0	0	0	0	0.446	0.463	0.451	0.414	1.580	0.493	0.847	0.000	0.000	0.000	0.000	0.000	0.000	0.000	0.000	0.000	0.000	0.000	0.000	0.000	0.000	52	340	5059	4936	-1.165	Error	Error	1560	3499	0	0	1562	3374	0	0	0	0
2	6	13	""	"itK(CUU)D1"	7270	27040	70	2109	2097	1462	93	110	175	96	78	0	1693	1943	1030	80	87	33	100	100	0	0	0	0	0	0	0	0	0	0	0	0	0	0	0	0	0	0	0	1.250	1.076	0.940	0.841	1.907	1.230	0.788	0.000	0.000	0.000	0.000	0.000	0.000	0.000	0.000	0.000	0.000	0.000	0.000	0.000	0.000	32	236	3629	3867	0.322	Error	Error	2016	1613	0	0	2004	1863	0	0	0	0
2	7	13	""	"iYDR379W"	7450	27030	90	3482	3230	1826	95	98	40	100	100	0	5716	5470	1852	81	88	29	100	100	0	0	0	0	0	0	0	0	0	0	0	0	0	0	0	0	0	0	0	0.601	0.582	0.540	0.462	1.939	0.618	0.836	0.000	0.000	0.000	0.000	0.000	0.000	0.000	0.000	0.000	0.000	0.000	0.000	0.000	0.000	52	420	9022	8524	-0.734	Error	Error	3387	5635	0	0	3135	5389	0	0	0	0
2	8	13	""	"iYDR383C"	7640	27030	80	1393	1595	1029	96	100	44	100	98	0	1897	1766	734	87	92	32	100	100	0	0	0	0	0	0	0	0	0	0	0	0	0	0	0	0	0	0	0	0.717	0.893	0.796	0.753	2.101	0.985	0.778	0.000	0.000	0.000	0.000	0.000	0.000	0.000	0.000	0.000	0.000	0.000	0.000	0.000	0.000	52	340	3107	3178	-0.481	Error	Error	1297	1810	0	0	1499	1679	0	0	0	0
2	9	13	""	"iYDR387C"	7840	27020	70	1647	1689	848	99	107	66	100	100	0	2032	2047	765	85	98	117	100	100	0	0	0	0	0	0	0	0	0	0	0	0	0	0	0	0	0	0	0	0.795	0.810	0.764	0.733	1.618	0.832	0.794	0.000	0.000	0.000	0.000	0.000	0.000	0.000	0.000	0.000	0.000	0.000	0.000	0.000	0.000	32	236	3495	3552	-0.331	Error	Error	1548	1947	0	0	1590	1962	0	0	0	0
2	10	13	""	"iYDR404C"	8040	27030	80	694	737	457	93	98	41	94	90	0	1476	1510	709	83	87	30	100	100	0	0	0	0	0	0	0	0	0	0	0	0	0	0	0	0	0	0	0	0.431	0.451	0.409	0.369	2.405	0.442	0.677	0.000	0.000	0.000	0.000	0.000	0.000	0.000	0.000	0.000	0.000	0.000	0.000	0.000	0.000	52	340	1994	2071	-1.213	Error	Error	601	1393	0	0	644	1427	0	0	0	0
2	11	13	""	"iYDR408C"	8240	27020	80	1420	1475	874	93	100	45	98	96	0	2455	2612	1252	81	87	27	100	100	0	0	0	0	0	0	0	0	0	0	0	0	0	0	0	0	0	0	0	0.559	0.546	0.531	0.506	2.344	0.528	0.756	0.000	0.000	0.000	0.000	0.000	0.000	0.000	0.000	0.000	0.000	0.000	0.000	0.000	0.000	52	340	3701	3913	-0.839	Error	Error	1327	2374	0	0	1382	2531	0	0	0	0
2	12	13	""	"iYDR413C"	8450	27020	90	523	567	313	90	97	42	94	88	0	1287	1374	719	89	92	29	100	100	0	0	0	0	0	0	0	0	0	0	0	0	0	0	0	0	0	0	0	0.361	0.371	0.407	0.344	2.684	0.346	0.730	0.000	0.000	0.000	0.000	0.000	0.000	0.000	0.000	0.000	0.000	0.000	0.000	0.000	0.000	52	414	1631	1762	-1.468	Error	Error	433	1198	0	0	477	1285	0	0	0	0
2	13	13	""	"itS(UGA)E-0"	8670	27020	90	483	993	1109	93	98	40	100	100	0	2799	3635	3196	92	95	27	100	100	0	0	0	0	0	0	0	0	0	0	0	0	0	0	0	0	0	0	0	0.144	0.254	0.222	0.205	2.120	0.284	0.849	0.000	0.000	0.000	0.000	0.000	0.000	0.000	0.000	0.000	0.000	0.000	0.000	0.000	0.000	52	420	3097	4443	-2.795	Error	Error	390	2707	0	0	900	3543	0	0	0	0
2	14	13	""	"iYER068W"	8860	27020	80	564	732	580	90	99	42	94	90	0	2365	2490	1547	97	102	30	100	100	0	0	0	0	0	0	0	0	0	0	0	0	0	0	0	0	0	0	0	0.209	0.268	0.255	0.226	2.426	0.273	0.738	0.000	0.000	0.000	0.000	0.000	0.000	0.000	0.000	0.000	0.000	0.000	0.000	0.000	0.000	52	340	2742	3035	-2.258	Error	Error	474	2268	0	0	642	2393	0	0	0	0
2	15	13	""	"iYER072W"	9070	27020	70	618	715	532	94	100	43	90	87	0	1904	2232	934	98	104	35	100	100	0	0	0	0	0	0	0	0	0	0	0	0	0	0	0	0	0	0	0	0.290	0.291	0.247	0.198	2.413	0.334	0.801	0.000	0.000	0.000	0.000	0.000	0.000	0.000	0.000	0.000	0.000	0.000	0.000	0.000	0.000	32	236	2330	2755	-1.785	Error	Error	524	1806	0	0	621	2134	0	0	0	0
2	16	13	""	"iYER087W"	9270	27020	90	685	1295	1378	94	100	41	96	94	0	1130	1496	1166	98	103	29	100	100	0	0	0	0	0	0	0	0	0	0	0	0	0	0	0	0	0	0	0	0.573	0.859	0.728	0.621	2.148	1.025	0.870	0.000	0.000	0.000	0.000	0.000	0.000	0.000	0.000	0.000	0.000	0.000	0.000	0.000	0.000	52	414	1623	2599	-0.804	Error	Error	591	1032	0	0	1201	1398	0	0	0	0
2	17	13	""	"iYER090W"	9450	27020	90	523	819	695	94	100	42	98	98	0	1287	1294	783	104	109	31	98	98	0	0	0	0	0	0	0	0	0	0	0	0	0	0	0	0	0	0	0	0.363	0.609	0.625	0.538	2.451	0.683	0.734	0.000	0.000	0.000	0.000	0.000	0.000	0.000	0.000	0.000	0.000	0.000	0.000	0.000	0.000	52	414	1612	1915	-1.463	Error	Error	429	1183	0	0	725	1190	0	0	0	0
2	18	13	""	"iYER093C"	9660	27010	90	253	354	263	97	103	42	88	75	0	724	983	861	102	104	27	100	100	0	0	0	0	0	0	0	0	0	0	0	0	0	0	0	0	0	0	0	0.251	0.292	0.298	0.274	2.185	0.276	0.783	0.000	0.000	0.000	0.000	0.000	0.000	0.000	0.000	0.000	0.000	0.000	0.000	0.000	0.000	52	420	778	1138	-1.995	Error	Error	156	622	0	0	257	881	0	0	0	0
2	19	13	""	"iYER106W"	9860	27010	80	511	826	720	95	101	40	98	94	0	859	1128	846	103	106	27	100	100	0	0	0	0	0	0	0	0	0	0	0	0	0	0	0	0	0	0	0	0.550	0.713	0.682	0.629	2.531	0.757	0.780	0.000	0.000	0.000	0.000	0.000	0.000	0.000	0.000	0.000	0.000	0.000	0.000	0.000	0.000	52	340	1172	1756	-0.862	Error	Error	416	756	0	0	731	1025	0	0	0	0
2	20	13	""	"iYER110C"	10070	27010	80	283	397	352	94	107	74	76	53	0	597	829	657	108	115	51	100	98	0	0	0	0	0	0	0	0	0	0	0	0	0	0	0	0	0	0	0	0.387	0.420	0.388	0.323	2.574	0.446	0.762	0.000	0.000	0.000	0.000	0.000	0.000	0.000	0.000	0.000	0.000	0.000	0.000	0.000	0.000	52	340	678	1024	-1.371	Error	Error	189	489	0	0	303	721	0	0	0	0
2	21	13	""	"iYER114C"	10250	27010	60	833	1068	861	98	102	46	96	93	0	1261	1448	816	115	122	37	100	100	0	0	0	0	0	0	0	0	0	0	0	0	0	0	0	0	0	0	0	0.641	0.728	0.659	0.575	1.923	0.850	0.793	0.000	0.000	0.000	0.000	0.000	0.000	0.000	0.000	0.000	0.000	0.000	0.000	0.000	0.000	32	176	1881	2303	-0.641	Error	Error	735	1146	0	0	970	1333	0	0	0	0
2	1	14	""	"iYER131W"	6250	27240	90	1397	1892	1454	94	98	40	100	100	0	2540	2819	1755	77	84	31	100	100	0	0	0	0	0	0	0	0	0	0	0	0	0	0	0	0	0	0	0	0.529	0.656	0.665	0.618	1.703	0.704	0.868	0.000	0.000	0.000	0.000	0.000	0.000	0.000	0.000	0.000	0.000	0.000	0.000	0.000	0.000	52	420	3766	4540	-0.919	Error	Error	1303	2463	0	0	1798	2742	0	0	0	0
2	2	14	""	"iYERCdelta14"	6470	27230	70	1238	1737	1176	92	101	46	100	100	0	3892	3967	1753	77	86	40	100	100	0	0	0	0	0	0	0	0	0	0	0	0	0	0	0	0	0	0	0	0.300	0.423	0.429	0.384	1.607	0.445	0.800	0.000	0.000	0.000	0.000	0.000	0.000	0.000	0.000	0.000	0.000	0.000	0.000	0.000	0.000	32	236	4961	5535	-1.735	Error	Error	1146	3815	0	0	1645	3890	0	0	0	0
2	3	14	""	"itK(CUU)E2"	6660	27230	70	557	871	714	94	98	42	93	90	0	990	1384	759	77	84	31	100	100	0	0	0	0	0	0	0	0	0	0	0	0	0	0	0	0	0	0	0	0.507	0.594	0.507	0.423	2.294	0.688	0.810	0.000	0.000	0.000	0.000	0.000	0.000	0.000	0.000	0.000	0.000	0.000	0.000	0.000	0.000	32	236	1376	2084	-0.980	Error	Error	463	913	0	0	777	1307	0	0	0	0
2	4	14	""	"iYGL186C"	6860	27230	70	748	1295	1138	94	98	40	100	93	0	3124	3674	2372	81	85	29	100	100	0	0	0	0	0	0	0	0	0	0	0	0	0	0	0	0	0	0	0	0.215	0.334	0.257	0.243	1.910	0.365	0.814	0.000	0.000	0.000	0.000	0.000	0.000	0.000	0.000	0.000	0.000	0.000	0.000	0.000	0.000	32	236	3697	4794	-2.218	Error	Error	654	3043	0	0	1201	3593	0	0	0	0
2	5	14	""	"iYGL182C"	7040	27220	90	860	1096	842	90	98	45	98	96	0	1852	2379	1633	77	87	48	100	100	0	0	0	0	0	0	0	0	0	0	0	0	0	0	0	0	0	0	0	0.434	0.437	0.430	0.419	1.896	0.440	0.830	0.000	0.000	0.000	0.000	0.000	0.000	0.000	0.000	0.000	0.000	0.000	0.000	0.000	0.000	52	420	2545	3308	-1.205	Error	Error	770	1775	0	0	1006	2302	0	0	0	0
2	6	14	""	"iYGL179C-1"	7260	27220	60	294	458	432	94	96	41	75	68	0	573	1032	1083	80	88	49	100	100	0	0	0	0	0	0	0	0	0	0	0	0	0	0	0	0	0	0	0	0.406	0.382	0.369	0.334	2.097	0.350	0.709	0.000	0.000	0.000	0.000	0.000	0.000	0.000	0.000	0.000	0.000	0.000	0.000	0.000	0.000	32	176	693	1316	-1.302	Error	Error	200	493	0	0	364	952	0	0	0	0
2	7	14	""	"iYGL163C-1"	7450	27220	80	739	1606	1594	94	100	45	96	96	0	3119	3854	3287	85	91	35	96	96	0	0	0	0	0	0	0	0	0	0	0	0	0	0	0	0	0	0	0	0.213	0.401	0.400	0.391	3.147	0.423	0.863	0.000	0.000	0.000	0.000	0.000	0.000	0.000	0.000	0.000	0.000	0.000	0.000	0.000	0.000	52	340	3679	5281	-2.234	Error	Error	645	3034	0	0	1512	3769	0	0	0	0
2	8	14	""	"iYGL159W"	7660	27230	80	272	893	1225	98	105	45	80	65	0	627	1319	1600	84	89	31	98	96	0	0	0	0	0	0	0	0	0	0	0	0	0	0	0	0	0	0	0	0.320	0.644	0.486	0.458	2.373	0.707	0.812	0.000	0.000	0.000	0.000	0.000	0.000	0.000	0.000	0.000	0.000	0.000	0.000	0.000	0.000	52	340	717	2030	-1.642	Error	Error	174	543	0	0	795	1235	0	0	0	0
2	9	14	""	"iYGL157W"	7850	27220	90	802	1414	1532	98	101	41	98	96	0	1286	2268	1901	82	86	25	100	100	0	0	0	0	0	0	0	0	0	0	0	0	0	0	0	0	0	0	0	0.585	0.602	0.573	0.497	2.085	0.696	0.891	0.000	0.000	0.000	0.000	0.000	0.000	0.000	0.000	0.000	0.000	0.000	0.000	0.000	0.000	52	420	1908	3502	-0.774	Error	Error	704	1204	0	0	1316	2186	0	0	0	0
2	10	14	""	"iYGL139W"	8050	27220	70	394	910	917	92	101	51	93	78	0	761	1561	1239	84	95	47	100	100	0	0	0	0	0	0	0	0	0	0	0	0	0	0	0	0	0	0	0	0.446	0.554	0.501	0.384	2.262	0.626	0.852	0.000	0.000	0.000	0.000	0.000	0.000	0.000	0.000	0.000	0.000	0.000	0.000	0.000	0.000	32	236	979	2295	-1.165	Error	Error	302	677	0	0	818	1477	0	0	0	0
2	11	14	""	"iYGL135W"	8240	27220	70	771	1079	688	92	100	47	100	100	0	2527	2623	1494	85	97	59	100	100	0	0	0	0	0	0	0	0	0	0	0	0	0	0	0	0	0	0	0	0.278	0.389	0.403	0.386	1.968	0.367	0.771	0.000	0.000	0.000	0.000	0.000	0.000	0.000	0.000	0.000	0.000	0.000	0.000	0.000	0.000	32	236	3121	3525	-1.847	Error	Error	679	2442	0	0	987	2538	0	0	0	0
2	12	14	""	"iYGL130W"	8450	27220	60	618	935	830	93	99	40	93	84	0	745	1141	807	88	93	29	100	100	0	0	0	0	0	0	0	0	0	0	0	0	0	0	0	0	0	0	0	0.799	0.800	0.701	0.530	2.802	0.902	0.806	0.000	0.000	0.000	0.000	0.000	0.000	0.000	0.000	0.000	0.000	0.000	0.000	0.000	0.000	32	176	1182	1895	-0.324	Error	Error	525	657	0	0	842	1053	0	0	0	0
2	13	14	""	"iYGL114W"	8680	27220	80	436	620	468	91	98	41	94	84	0	710	957	631	91	92	25	100	96	0	0	0	0	0	0	0	0	0	0	0	0	0	0	0	0	0	0	0	0.557	0.611	0.561	0.528	2.305	0.643	0.782	0.000	0.000	0.000	0.000	0.000	0.000	0.000	0.000	0.000	0.000	0.000	0.000	0.000	0.000	52	340	964	1395	-0.843	Error	Error	345	619	0	0	529	866	0	0	0	0
2	14	14	""	"iYGL110C"	8870	27230	70	123	130	43	98	102	40	31	12	0	208	212	58	96	100	28	96	84	0	0	0	0	0	0	0	0	0	0	0	0	0	0	0	0	0	0	0	0.223	0.276	0.355	0.331	2.625	0.414	0.079	0.000	0.000	0.000	0.000	0.000	0.000	0.000	0.000	0.000	0.000	0.000	0.000	0.000	0.000	32	236	137	148	-2.163	Error	Error	25	112	0	0	32	116	0	0	0	0
2	15	14	""	"iYGL105W"	9050	27210	70	581	817	659	100	106	43	96	87	0	735	1178	791	100	108	41	100	100	0	0	0	0	0	0	0	0	0	0	0	0	0	0	0	0	0	0	0	0.757	0.665	0.616	0.501	2.285	0.716	0.841	0.000	0.000	0.000	0.000	0.000	0.000	0.000	0.000	0.000	0.000	0.000	0.000	0.000	0.000	32	236	1116	1795	-0.401	Error	Error	481	635	0	0	717	1078	0	0	0	0
2	16	14	""	"iYGR177C"	9240	27220	70	621	1133	1187	100	101	41	93	78	0	784	1694	1483	100	105	34	100	100	0	0	0	0	0	0	0	0	0	0	0	0	0	0	0	0	0	0	0	0.762	0.648	0.562	0.406	2.656	0.707	0.859	0.000	0.000	0.000	0.000	0.000	0.000	0.000	0.000	0.000	0.000	0.000	0.000	0.000	0.000	32	236	1205	2627	-0.393	Error	Error	521	684	0	0	1033	1594	0	0	0	0
2	17	14	""	"itL(CAA)G3"	9460	27220	80	730	1100	885	93	97	40	98	92	0	2311	2261	1389	105	108	29	100	100	0	0	0	0	0	0	0	0	0	0	0	0	0	0	0	0	0	0	0	0.289	0.467	0.466	0.419	2.474	0.506	0.835	0.000	0.000	0.000	0.000	0.000	0.000	0.000	0.000	0.000	0.000	0.000	0.000	0.000	0.000	52	340	2843	3163	-1.792	Error	Error	637	2206	0	0	1007	2156	0	0	0	0
2	18	14	""	"iYGR185C"	9650	27210	60	362	450	300	96	102	39	100	84	0	1009	1137	612	107	110	30	96	96	0	0	0	0	0	0	0	0	0	0	0	0	0	0	0	0	0	0	0	0.295	0.344	0.332	0.289	2.097	0.360	0.773	0.000	0.000	0.000	0.000	0.000	0.000	0.000	0.000	0.000	0.000	0.000	0.000	0.000	0.000	32	176	1168	1384	-1.762	Error	Error	266	902	0	0	354	1030	0	0	0	0
2	19	14	""	"iYGR199W"	9850	27210	70	342	651	603	96	103	43	93	78	0	425	665	465	100	104	29	100	100	0	0	0	0	0	0	0	0	0	0	0	0	0	0	0	0	0	0	0	0.757	0.982	0.719	0.738	2.233	1.159	0.748	0.000	0.000	0.000	0.000	0.000	0.000	0.000	0.000	0.000	0.000	0.000	0.000	0.000	0.000	32	236	571	1120	-0.402	Error	Error	246	325	0	0	555	565	0	0	0	0
2	20	14	""	"iYGR203W"	10040	27220	70	267	265	99	95	104	42	87	84	0	733	714	239	109	111	28	100	100	0	0	0	0	0	0	0	0	0	0	0	0	0	0	0	0	0	0	0	0.276	0.281	0.287	0.290	1.890	0.257	0.562	0.000	0.000	0.000	0.000	0.000	0.000	0.000	0.000	0.000	0.000	0.000	0.000	0.000	0.000	32	236	796	775	-1.859	Error	Error	172	624	0	0	170	605	0	0	0	0
2	21	14	""	"iYGR207C"	10250	27210	70	377	468	293	100	100	42	96	87	0	717	814	385	115	118	31	100	100	0	0	0	0	0	0	0	0	0	0	0	0	0	0	0	0	0	0	0	0.460	0.526	0.504	0.443	1.943	0.562	0.707	0.000	0.000	0.000	0.000	0.000	0.000	0.000	0.000	0.000	0.000	0.000	0.000	0.000	0.000	32	236	879	1067	-1.120	Error	Error	277	602	0	0	368	699	0	0	0	0
2	1	15	""	"iYGR221C"	6270	27450	90	637	1369	1662	93	95	40	98	88	0	995	1666	1623	75	82	30	100	100	0	0	0	0	0	0	0	0	0	0	0	0	0	0	0	0	0	0	0	0.591	0.802	0.604	0.545	2.241	0.932	0.875	0.000	0.000	0.000	0.000	0.000	0.000	0.000	0.000	0.000	0.000	0.000	0.000	0.000	0.000	52	409	1464	2867	-0.758	Error	Error	544	920	0	0	1276	1591	0	0	0	0
2	2	15	""	"iYGR224W"	6450	27430	90	703	1368	1450	95	99	43	100	98	0	1653	2465	2110	76	81	30	100	100	0	0	0	0	0	0	0	0	0	0	0	0	0	0	0	0	0	0	0	0.386	0.533	0.419	0.421	1.898	0.598	0.894	0.000	0.000	0.000	0.000	0.000	0.000	0.000	0.000	0.000	0.000	0.000	0.000	0.000	0.000	52	415	2185	3662	-1.375	Error	Error	608	1577	0	0	1273	2389	0	0	0	0
2	3	15	""	"iYGR230W"	6650	27430	60	653	1020	949	88	95	39	100	96	0	917	1280	947	78	82	29	100	100	0	0	0	0	0	0	0	0	0	0	0	0	0	0	0	0	0	0	0	0.673	0.775	0.664	0.595	1.995	0.881	0.859	0.000	0.000	0.000	0.000	0.000	0.000	0.000	0.000	0.000	0.000	0.000	0.000	0.000	0.000	32	176	1404	2134	-0.570	Error	Error	565	839	0	0	932	1202	0	0	0	0
2	4	15	""	"iYGR247W"	6850	27440	80	617	690	395	92	97	42	96	92	0	1602	1518	742	77	84	30	100	100	0	0	0	0	0	0	0	0	0	0	0	0	0	0	0	0	0	0	0	0.344	0.415	0.397	0.351	1.996	0.419	0.816	0.000	0.000	0.000	0.000	0.000	0.000	0.000	0.000	0.000	0.000	0.000	0.000	0.000	0.000	52	340	2050	2039	-1.538	Error	Error	525	1525	0	0	598	1441	0	0	0	0
2	5	15	""	"iYGR250C-0"	7050	27430	80	358	1093	1593	90	96	43	94	84	0	950	2307	2940	78	83	28	100	98	0	0	0	0	0	0	0	0	0	0	0	0	0	0	0	0	0	0	0	0.307	0.450	0.362	0.342	1.966	0.499	0.893	0.000	0.000	0.000	0.000	0.000	0.000	0.000	0.000	0.000	0.000	0.000	0.000	0.000	0.000	52	340	1140	3232	-1.702	Error	Error	268	872	0	0	1003	2229	0	0	0	0
2	6	15	""	"iYGR253C-0"	7250	27420	70	449	944	1031	97	101	45	87	81	0	1067	2266	2313	82	85	30	100	100	0	0	0	0	0	0	0	0	0	0	0	0	0	0	0	0	0	0	0	0.357	0.388	0.337	0.312	2.043	0.405	0.890	0.000	0.000	0.000	0.000	0.000	0.000	0.000	0.000	0.000	0.000	0.000	0.000	0.000	0.000	32	236	1337	3031	-1.485	Error	Error	352	985	0	0	847	2184	0	0	0	0
2	7	15	""	"iYHR186C"	7460	27420	90	789	1990	2402	94	101	44	100	98	0	1422	2583	2538	86	92	35	100	100	0	0	0	0	0	0	0	0	0	0	0	0	0	0	0	0	0	0	0	0.520	0.759	0.657	0.587	1.938	0.867	0.929	0.000	0.000	0.000	0.000	0.000	0.000	0.000	0.000	0.000	0.000	0.000	0.000	0.000	0.000	52	420	2031	4393	-0.943	Error	Error	695	1336	0	0	1896	2497	0	0	0	0
2	8	15	""	"iYHR191C"	7670	27430	90	479	822	812	92	101	44	96	90	0	905	1365	1087	84	88	27	100	100	0	0	0	0	0	0	0	0	0	0	0	0	0	0	0	0	0	0	0	0.471	0.570	0.469	0.462	2.042	0.640	0.850	0.000	0.000	0.000	0.000	0.000	0.000	0.000	0.000	0.000	0.000	0.000	0.000	0.000	0.000	52	420	1208	2011	-1.085	Error	Error	387	821	0	0	730	1281	0	0	0	0
2	9	15	""	"iYHR196W"	7860	27430	90	414	712	692	96	108	120	82	65	0	542	741	528	85	98	130	98	82	0	0	0	0	0	0	0	0	0	0	0	0	0	0	0	0	0	0	0	0.696	0.939	0.829	0.702	2.244	1.132	0.829	0.000	0.000	0.000	0.000	0.000	0.000	0.000	0.000	0.000	0.000	0.000	0.000	0.000	0.000	52	420	775	1272	-0.523	Error	Error	318	457	0	0	616	656	0	0	0	0
2	10	15	""	"iYHRCdelta16-0"	8070	27430	80	1751	4273	5336	95	109	134	100	98	0	4611	9101	8668	86	103	151	100	100	0	0	0	0	0	0	0	0	0	0	0	0	0	0	0	0	0	0	0	0.366	0.463	0.318	0.328	2.023	0.527	0.845	0.000	0.000	0.000	0.000	0.000	0.000	0.000	0.000	0.000	0.000	0.000	0.000	0.000	0.000	52	340	6181	13193	-1.450	Error	Error	1656	4525	0	0	4178	9015	0	0	0	0
2	11	15	""	"iYIL174W-1"	8260	27420	70	719	1327	1167	95	97	40	96	96	0	1946	2630	1767	88	92	32	100	100	0	0	0	0	0	0	0	0	0	0	0	0	0	0	0	0	0	0	0	0.336	0.485	0.410	0.368	1.944	0.538	0.873	0.000	0.000	0.000	0.000	0.000	0.000	0.000	0.000	0.000	0.000	0.000	0.000	0.000	0.000	32	236	2482	3774	-1.574	Error	Error	624	1858	0	0	1232	2542	0	0	0	0
2	12	15	""	"iYIL170W-1"	8470	27430	90	743	935	711	95	98	41	92	92	0	2970	3574	2060	92	99	36	100	100	0	0	0	0	0	0	0	0	0	0	0	0	0	0	0	0	0	0	0	0.225	0.241	0.221	0.184	2.170	0.259	0.854	0.000	0.000	0.000	0.000	0.000	0.000	0.000	0.000	0.000	0.000	0.000	0.000	0.000	0.000	52	420	3526	4322	-2.151	Error	Error	648	2878	0	0	840	3482	0	0	0	0
2	13	15	""	"iYIL153W"	8660	27430	80	241	368	351	95	100	39	84	75	0	386	521	394	93	98	38	96	88	0	0	0	0	0	0	0	0	0	0	0	0	0	0	0	0	0	0	0	0.498	0.638	0.609	0.541	2.879	0.766	0.774	0.000	0.000	0.000	0.000	0.000	0.000	0.000	0.000	0.000	0.000	0.000	0.000	0.000	0.000	52	340	439	701	-1.005	Error	Error	146	293	0	0	273	428	0	0	0	0
2	14	15	""	"iYIL149C"	8860	27420	70	919	1128	780	95	102	45	100	100	0	3210	3809	1570	98	104	33	100	100	0	0	0	0	0	0	0	0	0	0	0	0	0	0	0	0	0	0	0	0.265	0.278	0.224	0.216	1.829	0.300	0.791	0.000	0.000	0.000	0.000	0.000	0.000	0.000	0.000	0.000	0.000	0.000	0.000	0.000	0.000	32	236	3936	4744	-1.917	Error	Error	824	3112	0	0	1033	3711	0	0	0	0
2	15	15	""	"iYIL145C"	9060	27420	70	1170	1326	953	100	106	41	100	100	0	4111	4520	1688	102	108	40	100	100	0	0	0	0	0	0	0	0	0	0	0	0	0	0	0	0	0	0	0	0.267	0.278	0.251	0.208	2.057	0.300	0.779	0.000	0.000	0.000	0.000	0.000	0.000	0.000	0.000	0.000	0.000	0.000	0.000	0.000	0.000	32	236	5079	5644	-1.906	Error	Error	1070	4009	0	0	1226	4418	0	0	0	0
2	16	15	""	"iYIL129C"	9260	27410	70	962	1315	1072	97	99	41	100	100	0	2780	3942	2831	103	105	27	100	100	0	0	0	0	0	0	0	0	0	0	0	0	0	0	0	0	0	0	0	0.323	0.317	0.281	0.255	1.774	0.330	0.901	0.000	0.000	0.000	0.000	0.000	0.000	0.000	0.000	0.000	0.000	0.000	0.000	0.000	0.000	32	236	3542	5057	-1.630	Error	Error	865	2677	0	0	1218	3839	0	0	0	0
2	17	15	""	"iYIL125W"	9460	27420	80	273	425	368	103	108	45	78	71	0	716	975	741	106	110	31	100	100	0	0	0	0	0	0	0	0	0	0	0	0	0	0	0	0	0	0	0	0.279	0.371	0.368	0.285	2.637	0.405	0.775	0.000	0.000	0.000	0.000	0.000	0.000	0.000	0.000	0.000	0.000	0.000	0.000	0.000	0.000	52	340	780	1191	-1.843	Error	Error	170	610	0	0	322	869	0	0	0	0
2	18	15	""	"iYIL121W"	9660	27420	80	557	965	1012	99	104	45	98	96	0	1080	1463	1192	99	105	32	100	100	0	0	0	0	0	0	0	0	0	0	0	0	0	0	0	0	0	0	0	0.467	0.635	0.629	0.557	2.061	0.735	0.850	0.000	0.000	0.000	0.000	0.000	0.000	0.000	0.000	0.000	0.000	0.000	0.000	0.000	0.000	52	340	1439	2230	-1.099	Error	Error	458	981	0	0	866	1364	0	0	0	0
2	19	15	""	"itR(ACG)J"	9860	27410	80	444	757	685	98	103	38	100	94	0	745	1117	871	107	110	27	100	100	0	0	0	0	0	0	0	0	0	0	0	0	0	0	0	0	0	0	0	0.542	0.652	0.567	0.554	1.832	0.704	0.858	0.000	0.000	0.000	0.000	0.000	0.000	0.000	0.000	0.000	0.000	0.000	0.000	0.000	0.000	52	340	984	1669	-0.883	Error	Error	346	638	0	0	659	1010	0	0	0	0
2	20	15	""	"iYJL098W"	10060	27410	80	252	298	157	99	104	45	88	76	0	544	570	269	111	114	29	100	98	0	0	0	0	0	0	0	0	0	0	0	0	0	0	0	0	0	0	0	0.353	0.434	0.452	0.437	2.086	0.438	0.646	0.000	0.000	0.000	0.000	0.000	0.000	0.000	0.000	0.000	0.000	0.000	0.000	0.000	0.000	52	340	586	658	-1.501	Error	Error	153	433	0	0	199	459	0	0	0	0
2	21	15	""	"iYJL093C"	10260	27410	70	667	1128	983	98	105	46	100	93	0	2261	3008	1955	111	115	37	100	100	0	0	0	0	0	0	0	0	0	0	0	0	0	0	0	0	0	0	0	0.265	0.356	0.299	0.259	2.128	0.399	0.873	0.000	0.000	0.000	0.000	0.000	0.000	0.000	0.000	0.000	0.000	0.000	0.000	0.000	0.000	32	236	2719	3927	-1.918	Error	Error	569	2150	0	0	1030	2897	0	0	0	0
2	1	16	""	"iYJL074C"	6260	27640	100	1840	1958	1257	89	95	40	98	97	0	2851	3102	1886	77	82	29	97	93	0	0	0	0	0	0	0	0	0	0	0	0	0	0	0	0	0	0	0	0.631	0.618	0.639	0.633	2.234	0.608	0.904	0.000	0.000	0.000	0.000	0.000	0.000	0.000	0.000	0.000	0.000	0.000	0.000	0.000	0.000	80	535	4525	4894	-0.664	Error	Error	1751	2774	0	0	1869	3025	0	0	0	0
2	2	16	""	"iYJL070C"	6460	27630	80	682	1019	850	92	97	43	100	98	0	997	1415	980	80	85	26	100	100	0	0	0	0	0	0	0	0	0	0	0	0	0	0	0	0	0	0	0	0.643	0.694	0.624	0.599	1.772	0.761	0.869	0.000	0.000	0.000	0.000	0.000	0.000	0.000	0.000	0.000	0.000	0.000	0.000	0.000	0.000	52	340	1507	2262	-0.636	Error	Error	590	917	0	0	927	1335	0	0	0	0
2	3	16	""	"iYJL064W"	6650	27640	80	411	489	292	92	96	37	96	94	0	964	1175	696	80	84	26	100	100	0	0	0	0	0	0	0	0	0	0	0	0	0	0	0	0	0	0	0	0.361	0.363	0.357	0.334	1.905	0.363	0.823	0.000	0.000	0.000	0.000	0.000	0.000	0.000	0.000	0.000	0.000	0.000	0.000	0.000	0.000	52	340	1203	1492	-1.470	Error	Error	319	884	0	0	397	1095	0	0	0	0
2	4	16	""	"iSNR60"	6860	27640	100	670	960	906	93	97	40	92	87	0	925	1529	1338	78	84	28	95	93	0	0	0	0	0	0	0	0	0	0	0	0	0	0	0	0	0	0	0	0.681	0.598	0.590	0.567	2.306	0.621	0.863	0.000	0.000	0.000	0.000	0.000	0.000	0.000	0.000	0.000	0.000	0.000	0.000	0.000	0.000	80	542	1424	2318	-0.554	Error	Error	577	847	0	0	867	1451	0	0	0	0
2	5	16	""	"iYJLCdelta5"	7060	27640	90	599	916	841	92	97	43	98	98	0	1190	1506	1047	82	87	29	100	100	0	0	0	0	0	0	0	0	0	0	0	0	0	0	0	0	0	0	0	0.458	0.579	0.502	0.465	2.400	0.637	0.743	0.000	0.000	0.000	0.000	0.000	0.000	0.000	0.000	0.000	0.000	0.000	0.000	0.000	0.000	52	420	1615	2248	-1.128	Error	Error	507	1108	0	0	824	1424	0	0	0	0
2	6	16	""	"iYJL043W"	7270	27640	80	260	365	281	88	94	43	82	75	0	617	798	534	82	90	37	100	98	0	0	0	0	0	0	0	0	0	0	0	0	0	0	0	0	0	0	0	0.321	0.387	0.359	0.290	2.568	0.418	0.755	0.000	0.000	0.000	0.000	0.000	0.000	0.000	0.000	0.000	0.000	0.000	0.000	0.000	0.000	52	340	707	993	-1.637	Error	Error	172	535	0	0	277	716	0	0	0	0
2	7	16	""	"iYJL029C"	7450	27630	80	355	455	308	97	102	45	94	88	0	693	792	424	88	94	37	100	98	0	0	0	0	0	0	0	0	0	0	0	0	0	0	0	0	0	0	0	0.426	0.509	0.524	0.465	1.728	0.570	0.805	0.000	0.000	0.000	0.000	0.000	0.000	0.000	0.000	0.000	0.000	0.000	0.000	0.000	0.000	52	340	863	1062	-1.230	Error	Error	258	605	0	0	358	704	0	0	0	0
2	8	16	""	"iYJL026W"	7650	27630	90	308	443	359	94	100	43	96	86	0	492	624	380	87	94	34	100	100	0	0	0	0	0	0	0	0	0	0	0	0	0	0	0	0	0	0	0	0.528	0.650	0.570	0.502	2.137	0.768	0.787	0.000	0.000	0.000	0.000	0.000	0.000	0.000	0.000	0.000	0.000	0.000	0.000	0.000	0.000	52	420	619	886	-0.920	Error	Error	214	405	0	0	349	537	0	0	0	0
2	9	16	""	"iYJL022W"	7870	27630	100	929	1481	1507	93	100	42	98	97	0	1653	2115	1677	86	92	28	100	100	0	0	0	0	0	0	0	0	0	0	0	0	0	0	0	0	0	0	0	0.534	0.684	0.621	0.615	2.345	0.776	0.827	0.000	0.000	0.000	0.000	0.000	0.000	0.000	0.000	0.000	0.000	0.000	0.000	0.000	0.000	80	527	2403	3417	-0.906	Error	Error	836	1567	0	0	1388	2029	0	0	0	0
2	10	16	""	"iYKL121W"	8050	27620	90	967	1766	1629	94	100	48	100	100	0	2304	2996	2306	89	97	51	100	100	0	0	0	0	0	0	0	0	0	0	0	0	0	0	0	0	0	0	0	0.394	0.575	0.534	0.492	1.634	0.621	0.879	0.000	0.000	0.000	0.000	0.000	0.000	0.000	0.000	0.000	0.000	0.000	0.000	0.000	0.000	52	407	3088	4579	-1.343	Error	Error	873	2215	0	0	1672	2907	0	0	0	0
2	11	16	""	"iYKL117W"	8250	27630	90	1417	2484	2571	97	99	42	100	100	0	1355	1592	1223	90	95	32	100	100	0	0	0	0	0	0	0	0	0	0	0	0	0	0	0	0	0	0	0	1.043	1.589	1.385	1.360	2.121	1.920	0.855	0.000	0.000	0.000	0.000	0.000	0.000	0.000	0.000	0.000	0.000	0.000	0.000	0.000	0.000	52	420	2585	3889	0.061	Error	Error	1320	1265	0	0	2387	1502	0	0	0	0
2	12	16	""	"iYKL111C"	8460	27630	60	188	249	157	92	99	41	90	53	0	359	402	207	91	94	27	100	93	0	0	0	0	0	0	0	0	0	0	0	0	0	0	0	0	0	0	0	0.358	0.505	0.404	0.473	2.014	0.590	0.668	0.000	0.000	0.000	0.000	0.000	0.000	0.000	0.000	0.000	0.000	0.000	0.000	0.000	0.000	32	176	364	468	-1.481	Error	Error	96	268	0	0	157	311	0	0	0	0
2	13	16	""	"iYKL097W-A-0"	8650	27630	70	382	623	542	98	101	43	87	84	0	1456	2018	1523	98	102	30	100	100	0	0	0	0	0	0	0	0	0	0	0	0	0	0	0	0	0	0	0	0.209	0.273	0.227	0.200	2.410	0.294	0.835	0.000	0.000	0.000	0.000	0.000	0.000	0.000	0.000	0.000	0.000	0.000	0.000	0.000	0.000	32	236	1642	2445	-2.258	Error	Error	284	1358	0	0	525	1920	0	0	0	0
2	14	16	""	"iYKL094W"	8850	27620	80	1340	1952	1562	90	98	43	100	100	0	2793	2858	1713	97	102	35	100	100	0	0	0	0	0	0	0	0	0	0	0	0	0	0	0	0	0	0	0	0.464	0.674	0.588	0.587	1.784	0.746	0.868	0.000	0.000	0.000	0.000	0.000	0.000	0.000	0.000	0.000	0.000	0.000	0.000	0.000	0.000	52	340	3946	4623	-1.109	Error	Error	1250	2696	0	0	1862	2761	0	0	0	0
2	15	16	""	"iYKL090W"	9060	27620	70	286	387	272	105	108	48	90	84	0	1240	1375	626	108	116	44	100	100	0	0	0	0	0	0	0	0	0	0	0	0	0	0	0	0	0	0	0	0.160	0.223	0.197	0.171	2.304	0.245	0.669	0.000	0.000	0.000	0.000	0.000	0.000	0.000	0.000	0.000	0.000	0.000	0.000	0.000	0.000	32	236	1313	1549	-2.645	Error	Error	181	1132	0	0	282	1267	0	0	0	0
2	16	16	""	"iYKL072W"	9260	27620	70	253	321	210	95	101	42	78	68	0	404	552	315	103	106	36	100	96	0	0	0	0	0	0	0	0	0	0	0	0	0	0	0	0	0	0	0	0.525	0.503	0.519	0.482	2.330	0.530	0.659	0.000	0.000	0.000	0.000	0.000	0.000	0.000	0.000	0.000	0.000	0.000	0.000	0.000	0.000	32	236	459	675	-0.930	Error	Error	158	301	0	0	226	449	0	0	0	0
2	17	16	""	"iYKL071W"	9450	27620	80	399	589	517	95	100	41	88	76	0	1218	1395	965	101	102	27	100	100	0	0	0	0	0	0	0	0	0	0	0	0	0	0	0	0	0	0	0	0.272	0.382	0.337	0.291	2.428	0.413	0.751	0.000	0.000	0.000	0.000	0.000	0.000	0.000	0.000	0.000	0.000	0.000	0.000	0.000	0.000	52	340	1421	1788	-1.877	Error	Error	304	1117	0	0	494	1294	0	0	0	0
2	18	16	""	"itV(AAC)K1-1"	9650	27620	80	400	595	512	99	100	39	94	90	0	1340	1738	1380	105	108	28	100	100	0	0	0	0	0	0	0	0	0	0	0	0	0	0	0	0	0	0	0	0.244	0.304	0.308	0.284	1.887	0.321	0.871	0.000	0.000	0.000	0.000	0.000	0.000	0.000	0.000	0.000	0.000	0.000	0.000	0.000	0.000	52	340	1536	2129	-2.037	Error	Error	301	1235	0	0	496	1633	0	0	0	0
2	19	16	""	"iYKL056C"	9860	27630	80	232	377	407	101	104	38	84	63	0	531	709	540	105	107	26	100	100	0	0	0	0	0	0	0	0	0	0	0	0	0	0	0	0	0	0	0	0.308	0.457	0.410	0.335	2.395	0.586	0.650	0.000	0.000	0.000	0.000	0.000	0.000	0.000	0.000	0.000	0.000	0.000	0.000	0.000	0.000	52	340	557	880	-1.701	Error	Error	131	426	0	0	276	604	0	0	0	0
2	20	16	""	"iYKL052C"	10060	27620	90	440	660	597	98	106	43	94	86	0	1477	1893	1354	110	112	28	100	100	0	0	0	0	0	0	0	0	0	0	0	0	0	0	0	0	0	0	0	0.250	0.315	0.320	0.260	2.268	0.350	0.847	0.000	0.000	0.000	0.000	0.000	0.000	0.000	0.000	0.000	0.000	0.000	0.000	0.000	0.000	52	420	1709	2345	-1.999	Error	Error	342	1367	0	0	562	1783	0	0	0	0
2	21	16	""	"iYKL048C"	10260	27620	90	558	635	368	98	101	40	100	94	0	1429	1437	659	112	115	29	100	100	0	0	0	0	0	0	0	0	0	0	0	0	0	0	0	0	0	0	0	0.349	0.405	0.393	0.351	1.802	0.422	0.819	0.000	0.000	0.000	0.000	0.000	0.000	0.000	0.000	0.000	0.000	0.000	0.000	0.000	0.000	52	420	1777	1862	-1.518	Error	Error	460	1317	0	0	537	1325	0	0	0	0
2	1	17	""	"iYLR069C"	6250	27840	90	612	861	730	90	96	40	96	92	0	941	1176	737	78	83	31	100	100	0	0	0	0	0	0	0	0	0	0	0	0	0	0	0	0	0	0	0	0.605	0.702	0.591	0.554	2.155	0.803	0.837	0.000	0.000	0.000	0.000	0.000	0.000	0.000	0.000	0.000	0.000	0.000	0.000	0.000	0.000	52	420	1385	1869	-0.725	Error	Error	522	863	0	0	771	1098	0	0	0	0
2	2	17	""	"iYLR073C"	6470	27840	90	1032	1326	1033	90	94	41	98	96	0	1802	2449	1538	75	79	26	100	100	0	0	0	0	0	0	0	0	0	0	0	0	0	0	0	0	0	0	0	0.545	0.521	0.506	0.441	1.930	0.556	0.864	0.000	0.000	0.000	0.000	0.000	0.000	0.000	0.000	0.000	0.000	0.000	0.000	0.000	0.000	52	414	2669	3610	-0.874	Error	Error	942	1727	0	0	1236	2374	0	0	0	0
2	3	17	""	"iYLR078C"	6650	27830	90	1326	1878	1541	92	96	43	100	98	0	1613	2446	1761	76	82	33	100	100	0	0	0	0	0	0	0	0	0	0	0	0	0	0	0	0	0	0	0	0.803	0.754	0.725	0.671	1.998	0.798	0.924	0.000	0.000	0.000	0.000	0.000	0.000	0.000	0.000	0.000	0.000	0.000	0.000	0.000	0.000	52	414	2771	4156	-0.317	Error	Error	1234	1537	0	0	1786	2370	0	0	0	0
2	4	17	""	"iYLR094C"	6870	27840	80	898	1368	1124	89	94	40	100	100	0	2954	3820	2560	76	81	26	100	98	0	0	0	0	0	0	0	0	0	0	0	0	0	0	0	0	0	0	0	0.281	0.342	0.289	0.309	2.027	0.361	0.860	0.000	0.000	0.000	0.000	0.000	0.000	0.000	0.000	0.000	0.000	0.000	0.000	0.000	0.000	52	340	3687	5023	-1.831	Error	Error	809	2878	0	0	1279	3744	0	0	0	0
2	5	17	""	"iYLR098C"	7060	27830	80	530	888	877	95	100	41	98	90	0	985	1356	972	81	87	32	98	98	0	0	0	0	0	0	0	0	0	0	0	0	0	0	0	0	0	0	0	0.481	0.622	0.521	0.486	1.928	0.738	0.822	0.000	0.000	0.000	0.000	0.000	0.000	0.000	0.000	0.000	0.000	0.000	0.000	0.000	0.000	52	340	1339	2068	-1.055	Error	Error	435	904	0	0	793	1275	0	0	0	0
2	6	17	""	"iYLR104W"	7270	27830	60	165	266	253	88	94	42	62	46	0	292	358	218	80	86	41	96	87	0	0	0	0	0	0	0	0	0	0	0	0	0	0	0	0	0	0	0	0.363	0.640	0.578	0.414	2.819	0.926	0.695	0.000	0.000	0.000	0.000	0.000	0.000	0.000	0.000	0.000	0.000	0.000	0.000	0.000	0.000	32	176	289	456	-1.461	Error	Error	77	212	0	0	178	278	0	0	0	0
2	7	17	""	"iYLR117C"	7460	27830	90	1406	1926	1449	97	102	45	98	98	0	2171	2964	1712	85	92	36	100	100	0	0	0	0	0	0	0	0	0	0	0	0	0	0	0	0	0	0	0	0.628	0.635	0.567	0.499	2.015	0.689	0.849	0.000	0.000	0.000	0.000	0.000	0.000	0.000	0.000	0.000	0.000	0.000	0.000	0.000	0.000	52	420	3395	4708	-0.672	Error	Error	1309	2086	0	0	1829	2879	0	0	0	0
2	8	17	""	"iYLR121C"	7650	27830	70	669	904	698	101	107	55	93	87	0	1880	2260	1403	90	106	78	100	100	0	0	0	0	0	0	0	0	0	0	0	0	0	0	0	0	0	0	0	0.317	0.370	0.354	0.288	2.062	0.381	0.832	0.000	0.000	0.000	0.000	0.000	0.000	0.000	0.000	0.000	0.000	0.000	0.000	0.000	0.000	32	236	2358	2973	-1.656	Error	Error	568	1790	0	0	803	2170	0	0	0	0
2	9	17	""	"iYLR125W"	7850	27830	80	847	2639	3491	93	99	44	98	94	0	1469	2653	2586	87	91	25	100	100	0	0	0	0	0	0	0	0	0	0	0	0	0	0	0	0	0	0	0	0.546	0.992	0.723	0.669	2.200	1.224	0.898	0.000	0.000	0.000	0.000	0.000	0.000	0.000	0.000	0.000	0.000	0.000	0.000	0.000	0.000	52	340	2136	5112	-0.874	Error	Error	754	1382	0	0	2546	2566	0	0	0	0
2	10	17	""	"itD(GUC)L1"	8050	27830	80	363	433	215	96	99	42	94	90	0	541	565	214	89	93	29	100	100	0	0	0	0	0	0	0	0	0	0	0	0	0	0	0	0	0	0	0	0.591	0.708	0.757	0.661	1.857	0.753	0.726	0.000	0.000	0.000	0.000	0.000	0.000	0.000	0.000	0.000	0.000	0.000	0.000	0.000	0.000	52	340	719	813	-0.759	Error	Error	267	452	0	0	337	476	0	0	0	0
2	11	17	""	"iYLR147C"	8240	27830	90	719	1011	797	94	98	43	98	98	0	1020	1362	938	88	93	30	100	100	0	0	0	0	0	0	0	0	0	0	0	0	0	0	0	0	0	0	0	0.671	0.720	0.713	0.629	1.862	0.771	0.884	0.000	0.000	0.000	0.000	0.000	0.000	0.000	0.000	0.000	0.000	0.000	0.000	0.000	0.000	52	420	1557	2191	-0.576	Error	Error	625	932	0	0	917	1274	0	0	0	0
2	12	17	""	"iYLR151C"	8450	27830	80	959	1116	596	94	99	41	100	100	0	1114	1218	562	92	96	31	100	100	0	0	0	0	0	0	0	0	0	0	0	0	0	0	0	0	0	0	0	0.846	0.908	0.916	0.854	1.737	0.949	0.863	0.000	0.000	0.000	0.000	0.000	0.000	0.000	0.000	0.000	0.000	0.000	0.000	0.000	0.000	52	340	1887	2148	-0.241	Error	Error	865	1022	0	0	1022	1126	0	0	0	0
2	13	17	""	"iYLR459W"	8660	27830	70	294	662	737	98	103	44	90	78	0	811	996	727	100	105	34	100	100	0	0	0	0	0	0	0	0	0	0	0	0	0	0	0	0	0	0	0	0.276	0.629	0.411	0.429	2.046	0.815	0.808	0.000	0.000	0.000	0.000	0.000	0.000	0.000	0.000	0.000	0.000	0.000	0.000	0.000	0.000	32	236	907	1460	-1.859	Error	Error	196	711	0	0	564	896	0	0	0	0
2	14	17	""	"iYLR461W-1"	8860	27830	70	2143	3375	3327	97	105	42	100	100	0	6751	8492	4885	97	105	34	100	100	0	0	0	0	0	0	0	0	0	0	0	0	0	0	0	0	0	0	0	0.307	0.390	0.314	0.275	2.106	0.458	0.779	0.000	0.000	0.000	0.000	0.000	0.000	0.000	0.000	0.000	0.000	0.000	0.000	0.000	0.000	32	236	8700	11673	-1.701	Error	Error	2046	6654	0	0	3278	8395	0	0	0	0
2	15	17	""	"iYML132W-0"	9050	27830	80	852	1466	1349	103	105	42	96	96	0	2590	3191	2560	102	105	30	100	100	0	0	0	0	0	0	0	0	0	0	0	0	0	0	0	0	0	0	0	0.301	0.441	0.451	0.398	2.256	0.457	0.832	0.000	0.000	0.000	0.000	0.000	0.000	0.000	0.000	0.000	0.000	0.000	0.000	0.000	0.000	52	340	3237	4452	-1.732	Error	Error	749	2488	0	0	1363	3089	0	0	0	0
2	16	17	""	"iYML117W-A"	9250	27820	80	558	828	654	99	105	43	100	98	0	1313	1789	1303	101	104	30	100	100	0	0	0	0	0	0	0	0	0	0	0	0	0	0	0	0	0	0	0	0.379	0.432	0.453	0.414	1.696	0.445	0.872	0.000	0.000	0.000	0.000	0.000	0.000	0.000	0.000	0.000	0.000	0.000	0.000	0.000	0.000	52	340	1671	2417	-1.401	Error	Error	459	1212	0	0	729	1688	0	0	0	0
2	17	17	""	"iYML113W"	9460	27820	70	370	861	859	98	103	39	100	96	0	1133	1771	1347	110	113	35	100	100	0	0	0	0	0	0	0	0	0	0	0	0	0	0	0	0	0	0	0	0.266	0.459	0.331	0.328	2.012	0.508	0.832	0.000	0.000	0.000	0.000	0.000	0.000	0.000	0.000	0.000	0.000	0.000	0.000	0.000	0.000	32	236	1295	2424	-1.911	Error	Error	272	1023	0	0	763	1661	0	0	0	0
2	18	17	""	"iYML109W"	9660	27820	90	270	378	264	100	106	43	92	76	0	638	704	372	105	111	33	100	100	0	0	0	0	0	0	0	0	0	0	0	0	0	0	0	0	0	0	0	0.319	0.464	0.383	0.364	2.457	0.506	0.714	0.000	0.000	0.000	0.000	0.000	0.000	0.000	0.000	0.000	0.000	0.000	0.000	0.000	0.000	52	420	703	877	-1.649	Error	Error	170	533	0	0	278	599	0	0	0	0
2	19	17	""	"iYML089C"	9850	27810	70	561	660	419	107	110	45	96	93	0	1968	2241	1085	108	112	29	100	100	0	0	0	0	0	0	0	0	0	0	0	0	0	0	0	0	0	0	0	0.244	0.259	0.235	0.228	1.885	0.269	0.784	0.000	0.000	0.000	0.000	0.000	0.000	0.000	0.000	0.000	0.000	0.000	0.000	0.000	0.000	32	236	2314	2686	-2.035	Error	Error	454	1860	0	0	553	2133	0	0	0	0
2	20	17	""	"iYML085C"	10070	27820	70	232	271	149	93	103	49	81	65	0	556	640	278	107	114	34	100	100	0	0	0	0	0	0	0	0	0	0	0	0	0	0	0	0	0	0	0	0.310	0.334	0.326	0.277	2.507	0.329	0.519	0.000	0.000	0.000	0.000	0.000	0.000	0.000	0.000	0.000	0.000	0.000	0.000	0.000	0.000	32	236	588	711	-1.692	Error	Error	139	449	0	0	178	533	0	0	0	0
2	21	17	""	"iYML081W"	10250	27820	70	516	743	506	104	111	49	96	96	0	1160	1356	521	116	124	41	100	100	0	0	0	0	0	0	0	0	0	0	0	0	0	0	0	0	0	0	0	0.395	0.515	0.400	0.405	2.125	0.584	0.745	0.000	0.000	0.000	0.000	0.000	0.000	0.000	0.000	0.000	0.000	0.000	0.000	0.000	0.000	32	236	1456	1879	-1.341	Error	Error	412	1044	0	0	639	1240	0	0	0	0
2	1	18	""	"iYML068W"	6250	28040	80	545	677	455	89	93	37	96	94	0	726	855	530	74	78	24	96	96	0	0	0	0	0	0	0	0	0	0	0	0	0	0	0	0	0	0	0	0.699	0.753	0.717	0.786	2.414	0.767	0.788	0.000	0.000	0.000	0.000	0.000	0.000	0.000	0.000	0.000	0.000	0.000	0.000	0.000	0.000	52	332	1108	1369	-0.516	Error	Error	456	652	0	0	588	781	0	0	0	0
2	2	18	""	"iYML064C"	6460	28050	80	678	1302	1397	93	98	41	96	96	0	1313	1931	1535	73	76	23	100	100	0	0	0	0	0	0	0	0	0	0	0	0	0	0	0	0	0	0	0	0.472	0.651	0.444	0.461	2.240	0.767	0.835	0.000	0.000	0.000	0.000	0.000	0.000	0.000	0.000	0.000	0.000	0.000	0.000	0.000	0.000	52	340	1825	3067	-1.084	Error	Error	585	1240	0	0	1209	1858	0	0	0	0
2	3	18	""	"iYML060W"	6650	28040	80	826	1280	1076	93	95	39	100	100	0	1233	1370	950	77	81	25	98	98	0	0	0	0	0	0	0	0	0	0	0	0	0	0	0	0	0	0	0	0.634	0.918	0.919	0.841	2.210	1.015	0.868	0.000	0.000	0.000	0.000	0.000	0.000	0.000	0.000	0.000	0.000	0.000	0.000	0.000	0.000	52	340	1889	2480	-0.657	Error	Error	733	1156	0	0	1187	1293	0	0	0	0
2	4	18	""	"iYMR222C"	6850	28040	90	1722	2233	1522	94	99	41	100	100	0	2430	2780	1714	78	82	25	100	100	0	0	0	0	0	0	0	0	0	0	0	0	0	0	0	0	0	0	0	0.692	0.792	0.724	0.702	1.772	0.813	0.886	0.000	0.000	0.000	0.000	0.000	0.000	0.000	0.000	0.000	0.000	0.000	0.000	0.000	0.000	52	420	3980	4841	-0.531	Error	Error	1628	2352	0	0	2139	2702	0	0	0	0
2	5	18	""	"iYMR226C"	7050	28040	80	260	399	384	95	99	43	82	75	0	503	667	589	79	84	27	98	96	0	0	0	0	0	0	0	0	0	0	0	0	0	0	0	0	0	0	0	0.389	0.517	0.446	0.447	2.416	0.571	0.773	0.000	0.000	0.000	0.000	0.000	0.000	0.000	0.000	0.000	0.000	0.000	0.000	0.000	0.000	52	340	589	892	-1.362	Error	Error	165	424	0	0	304	588	0	0	0	0
2	6	18	""	"iYMR230W"	7250	28040	80	297	676	892	94	99	40	96	90	0	698	1511	1740	81	84	28	100	98	0	0	0	0	0	0	0	0	0	0	0	0	0	0	0	0	0	0	0	0.329	0.407	0.328	0.348	2.085	0.450	0.814	0.000	0.000	0.000	0.000	0.000	0.000	0.000	0.000	0.000	0.000	0.000	0.000	0.000	0.000	52	340	820	2012	-1.604	Error	Error	203	617	0	0	582	1430	0	0	0	0
2	7	18	""	"iYMR245W"	7460	28040	80	758	1355	1510	94	98	38	96	94	0	1993	3211	2945	82	89	31	100	100	0	0	0	0	0	0	0	0	0	0	0	0	0	0	0	0	0	0	0	0.347	0.403	0.331	0.293	2.097	0.449	0.898	0.000	0.000	0.000	0.000	0.000	0.000	0.000	0.000	0.000	0.000	0.000	0.000	0.000	0.000	52	340	2575	4390	-1.525	Error	Error	664	1911	0	0	1261	3129	0	0	0	0
2	8	18	""	"iYMRWdelta19-0"	7670	28040	80	364	1165	1777	92	96	39	92	86	0	984	1964	2344	87	91	30	100	100	0	0	0	0	0	0	0	0	0	0	0	0	0	0	0	0	0	0	0	0.303	0.572	0.383	0.353	2.593	0.686	0.871	0.000	0.000	0.000	0.000	0.000	0.000	0.000	0.000	0.000	0.000	0.000	0.000	0.000	0.000	52	340	1169	2950	-1.722	Error	Error	272	897	0	0	1073	1877	0	0	0	0
2	9	18	""	"iYMR251W-A"	7860	28030	90	544	852	784	98	102	42	94	88	0	606	902	738	88	91	27	100	100	0	0	0	0	0	0	0	0	0	0	0	0	0	0	0	0	0	0	0	0.861	0.926	0.777	0.718	2.588	1.005	0.848	0.000	0.000	0.000	0.000	0.000	0.000	0.000	0.000	0.000	0.000	0.000	0.000	0.000	0.000	52	420	964	1568	-0.216	Error	Error	446	518	0	0	754	814	0	0	0	0
2	10	18	""	"iYMR267W"	8070	28040	90	713	1105	1080	97	100	43	94	92	0	865	1049	684	88	91	28	100	100	0	0	0	0	0	0	0	0	0	0	0	0	0	0	0	0	0	0	0	0.793	1.049	0.852	0.702	2.419	1.315	0.840	0.000	0.000	0.000	0.000	0.000	0.000	0.000	0.000	0.000	0.000	0.000	0.000	0.000	0.000	52	420	1393	1969	-0.335	Error	Error	616	777	0	0	1008	961	0	0	0	0
2	11	18	""	"iYMR271C"	8260	28030	70	580	1435	1645	92	97	44	96	87	0	1677	2393	2027	91	94	28	100	100	0	0	0	0	0	0	0	0	0	0	0	0	0	0	0	0	0	0	0	0.308	0.583	0.411	0.347	2.643	0.683	0.820	0.000	0.000	0.000	0.000	0.000	0.000	0.000	0.000	0.000	0.000	0.000	0.000	0.000	0.000	32	236	2074	3645	-1.700	Error	Error	488	1586	0	0	1343	2302	0	0	0	0
2	12	18	""	"iYMR273C"	8450	28040	90	493	754	766	93	98	41	98	92	0	941	1681	1572	92	97	29	100	100	0	0	0	0	0	0	0	0	0	0	0	0	0	0	0	0	0	0	0	0.471	0.416	0.384	0.346	2.013	0.435	0.862	0.000	0.000	0.000	0.000	0.000	0.000	0.000	0.000	0.000	0.000	0.000	0.000	0.000	0.000	52	420	1249	2250	-1.086	Error	Error	400	849	0	0	661	1589	0	0	0	0
2	13	18	""	"iYMR288W"	8660	28030	90	397	431	303	97	102	40	88	75	0	709	771	415	94	101	32	98	98	0	0	0	0	0	0	0	0	0	0	0	0	0	0	0	0	0	0	0	0.488	0.493	0.502	0.444	2.418	0.546	0.708	0.000	0.000	0.000	0.000	0.000	0.000	0.000	0.000	0.000	0.000	0.000	0.000	0.000	0.000	52	420	915	1011	-1.036	Error	Error	300	615	0	0	334	677	0	0	0	0
2	14	18	""	"iYMR292W"	8870	28030	80	187	210	120	100	104	44	71	50	0	281	306	134	95	101	31	98	94	0	0	0	0	0	0	0	0	0	0	0	0	0	0	0	0	0	0	0	0.468	0.521	0.500	0.502	2.312	0.653	0.390	0.000	0.000	0.000	0.000	0.000	0.000	0.000	0.000	0.000	0.000	0.000	0.000	0.000	0.000	52	340	273	321	-1.096	Error	Error	87	186	0	0	110	211	0	0	0	0
2	15	18	""	"iYMR296C"	9050	28030	90	342	638	640	105	106	41	90	84	0	876	1451	1281	101	105	30	100	100	0	0	0	0	0	0	0	0	0	0	0	0	0	0	0	0	0	0	0	0.306	0.395	0.336	0.297	2.431	0.421	0.793	0.000	0.000	0.000	0.000	0.000	0.000	0.000	0.000	0.000	0.000	0.000	0.000	0.000	0.000	52	414	1012	1883	-1.709	Error	Error	237	775	0	0	533	1350	0	0	0	0
2	16	18	""	"iYNL048W"	9260	28030	60	200	260	202	102	107	41	81	59	0	358	491	396	104	110	34	100	96	0	0	0	0	0	0	0	0	0	0	0	0	0	0	0	0	0	0	0	0.386	0.408	0.416	0.388	2.111	0.452	0.731	0.000	0.000	0.000	0.000	0.000	0.000	0.000	0.000	0.000	0.000	0.000	0.000	0.000	0.000	32	176	352	545	-1.374	Error	Error	98	254	0	0	158	387	0	0	0	0
2	17	18	""	"iYNL043C"	9460	28030	110	324	484	409	98	103	44	97	83	0	358	505	389	108	112	30	97	86	0	0	0	0	0	0	0	0	0	0	0	0	0	0	0	0	0	0	0	0.904	0.972	1.083	1.031	2.387	1.038	0.728	0.000	0.000	0.000	0.000	0.000	0.000	0.000	0.000	0.000	0.000	0.000	0.000	0.000	0.000	80	636	476	783	-0.146	Error	Error	226	250	0	0	386	397	0	0	0	0
2	18	18	""	"iYNL040W"	9650	28030	60	168	194	130	105	106	44	59	34	0	251	272	88	109	112	32	100	90	0	0	0	0	0	0	0	0	0	0	0	0	0	0	0	0	0	0	0	0.444	0.546	0.480	0.537	2.979	0.844	0.069	0.000	0.000	0.000	0.000	0.000	0.000	0.000	0.000	0.000	0.000	0.000	0.000	0.000	0.000	32	176	205	252	-1.172	Error	Error	63	142	0	0	89	163	0	0	0	0
2	19	18	""	"iYNL027W"	9850	28010	90	646	1304	1675	98	103	41	100	96	0	459	703	607	108	112	32	98	98	0	0	0	0	0	0	0	0	0	0	0	0	0	0	0	0	0	0	0	1.561	2.027	1.615	1.555	2.604	2.922	0.643	0.000	0.000	0.000	0.000	0.000	0.000	0.000	0.000	0.000	0.000	0.000	0.000	0.000	0.000	52	420	899	1801	0.643	Error	Error	548	351	0	0	1206	595	0	0	0	0
2	20	18	""	"iYNL024C"	10060	28030	100	462	629	594	100	103	41	93	88	0	470	541	333	110	115	29	100	98	0	0	0	0	0	0	0	0	0	0	0	0	0	0	0	0	0	0	0	1.006	1.227	1.263	0.990	2.924	1.653	0.649	0.000	0.000	0.000	0.000	0.000	0.000	0.000	0.000	0.000	0.000	0.000	0.000	0.000	0.000	80	546	722	960	0.008	Error	Error	362	360	0	0	529	431	0	0	0	0
2	21	18	""	"iYNL020C"	10260	28020	60	157	214	143	100	110	78	40	28	0	321	320	134	114	128	96	78	53	0	0	0	0	0	0	0	0	0	0	0	0	0	0	0	0	0	0	0	0.275	0.553	0.516	0.408	3.941	0.686	0.210	0.000	0.000	0.000	0.000	0.000	0.000	0.000	0.000	0.000	0.000	0.000	0.000	0.000	0.000	32	170	264	320	-1.861	Error	Error	57	207	0	0	114	206	0	0	0	0
2	1	19	""	"iYNL003C"	6260	28250	100	339	676	1037	87	91	38	93	91	0	569	1313	1977	74	78	25	100	98	0	0	0	0	0	0	0	0	0	0	0	0	0	0	0	0	0	0	0	0.509	0.475	0.433	0.413	2.206	0.497	0.890	0.000	0.000	0.000	0.000	0.000	0.000	0.000	0.000	0.000	0.000	0.000	0.000	0.000	0.000	80	533	747	1828	-0.974	Error	Error	252	495	0	0	589	1239	0	0	0	0
2	2	19	""	"iYNR001C"	6460	28250	100	386	784	1023	88	101	149	75	50	0	962	1933	2169	73	89	282	90	66	0	0	0	0	0	0	0	0	0	0	0	0	0	0	0	0	0	0	0	0.335	0.374	0.357	0.330	2.421	0.410	0.820	0.000	0.000	0.000	0.000	0.000	0.000	0.000	0.000	0.000	0.000	0.000	0.000	0.000	0.000	80	526	1187	2556	-1.577	Error	Error	298	889	0	0	696	1860	0	0	0	0
2	3	19	""	"iYNR002C"	6670	28250	90	167	292	298	93	98	44	63	42	0	323	568	583	75	80	25	100	100	0	0	0	0	0	0	0	0	0	0	0	0	0	0	0	0	0	0	0	0.298	0.404	0.355	0.312	2.757	0.437	0.717	0.000	0.000	0.000	0.000	0.000	0.000	0.000	0.000	0.000	0.000	0.000	0.000	0.000	0.000	52	414	322	692	-1.745	Error	Error	74	248	0	0	199	493	0	0	0	0
2	4	19	""	"iYNR018W"	6860	28250	110	557	867	990	91	97	42	97	95	0	1121	1546	1388	78	81	24	100	100	0	0	0	0	0	0	0	0	0	0	0	0	0	0	0	0	0	0	0	0.447	0.529	0.504	0.451	2.334	0.605	0.808	0.000	0.000	0.000	0.000	0.000	0.000	0.000	0.000	0.000	0.000	0.000	0.000	0.000	0.000	80	593	1509	2244	-1.162	Error	Error	466	1043	0	0	776	1468	0	0	0	0
2	5	19	""	"iYNR022C"	7060	28240	90	304	449	550	92	96	41	86	69	0	518	854	881	79	89	61	100	96	0	0	0	0	0	0	0	0	0	0	0	0	0	0	0	0	0	0	0	0.483	0.461	0.401	0.364	2.069	0.526	0.721	0.000	0.000	0.000	0.000	0.000	0.000	0.000	0.000	0.000	0.000	0.000	0.000	0.000	0.000	52	420	651	1132	-1.050	Error	Error	212	439	0	0	357	775	0	0	0	0
2	6	19	""	"iYNR027W"	7250	28250	70	159	171	94	93	97	40	62	37	0	270	335	238	82	84	25	100	93	0	0	0	0	0	0	0	0	0	0	0	0	0	0	0	0	0	0	0	0.351	0.308	0.320	0.317	2.491	0.314	0.399	0.000	0.000	0.000	0.000	0.000	0.000	0.000	0.000	0.000	0.000	0.000	0.000	0.000	0.000	32	236	254	331	-1.510	Error	Error	66	188	0	0	78	253	0	0	0	0
2	7	19	""	"iYOR064C"	7450	28230	70	722	1046	898	91	97	42	100	100	0	1259	1788	1456	83	90	35	100	100	0	0	0	0	0	0	0	0	0	0	0	0	0	0	0	0	0	0	0	0.537	0.560	0.577	0.528	1.714	0.577	0.924	0.000	0.000	0.000	0.000	0.000	0.000	0.000	0.000	0.000	0.000	0.000	0.000	0.000	0.000	32	236	1807	2660	-0.898	Error	Error	631	1176	0	0	955	1705	0	0	0	0
2	8	19	""	"iYOR068C"	7660	28230	80	901	2776	3458	94	97	37	100	100	0	1327	2448	2295	86	91	29	100	100	0	0	0	0	0	0	0	0	0	0	0	0	0	0	0	0	0	0	0	0.650	1.135	0.940	0.816	1.859	1.374	0.903	0.000	0.000	0.000	0.000	0.000	0.000	0.000	0.000	0.000	0.000	0.000	0.000	0.000	0.000	52	340	2048	5044	-0.621	Error	Error	807	1241	0	0	2682	2362	0	0	0	0
2	9	19	""	"iYOR071C"	7850	28230	80	265	383	355	94	100	40	86	63	0	438	660	563	84	89	26	100	98	0	0	0	0	0	0	0	0	0	0	0	0	0	0	0	0	0	0	0	0.483	0.502	0.442	0.396	2.759	0.553	0.808	0.000	0.000	0.000	0.000	0.000	0.000	0.000	0.000	0.000	0.000	0.000	0.000	0.000	0.000	52	340	525	865	-1.050	Error	Error	171	354	0	0	289	576	0	0	0	0
2	10	19	""	"iYOR086C"	8060	28230	80	909	1485	1459	94	99	40	100	100	0	1947	3053	2257	87	90	26	100	100	0	0	0	0	0	0	0	0	0	0	0	0	0	0	0	0	0	0	0	0.438	0.469	0.369	0.362	1.885	0.530	0.855	0.000	0.000	0.000	0.000	0.000	0.000	0.000	0.000	0.000	0.000	0.000	0.000	0.000	0.000	52	340	2675	4357	-1.190	Error	Error	815	1860	0	0	1391	2966	0	0	0	0
2	11	19	""	"iYOR090C"	8250	28220	70	797	1619	1482	93	100	42	100	100	0	1834	2894	2383	89	94	32	100	100	0	0	0	0	0	0	0	0	0	0	0	0	0	0	0	0	0	0	0	0.403	0.544	0.527	0.446	2.067	0.566	0.892	0.000	0.000	0.000	0.000	0.000	0.000	0.000	0.000	0.000	0.000	0.000	0.000	0.000	0.000	32	236	2449	4331	-1.310	Error	Error	704	1745	0	0	1526	2805	0	0	0	0
2	12	19	""	"iYOR094W"	8460	28230	80	487	866	793	94	100	72	96	90	0	854	1477	1281	91	105	183	100	92	0	0	0	0	0	0	0	0	0	0	0	0	0	0	0	0	0	0	0	0.515	0.557	0.532	0.481	1.923	0.577	0.891	0.000	0.000	0.000	0.000	0.000	0.000	0.000	0.000	0.000	0.000	0.000	0.000	0.000	0.000	52	340	1156	2158	-0.957	Error	Error	393	763	0	0	772	1386	0	0	0	0
2	13	19	""	"iYOR112W"	8670	28230	80	561	1089	1241	103	105	41	94	86	0	1054	1811	1688	94	99	33	100	100	0	0	0	0	0	0	0	0	0	0	0	0	0	0	0	0	0	0	0	0.477	0.574	0.465	0.407	2.394	0.651	0.861	0.000	0.000	0.000	0.000	0.000	0.000	0.000	0.000	0.000	0.000	0.000	0.000	0.000	0.000	52	340	1418	2703	-1.068	Error	Error	458	960	0	0	986	1717	0	0	0	0
2	14	19	""	"iYOR116C"	8870	28230	80	439	1212	1498	96	103	40	100	96	0	1528	2967	2846	102	106	29	100	100	0	0	0	0	0	0	0	0	0	0	0	0	0	0	0	0	0	0	0	0.241	0.390	0.279	0.262	2.227	0.450	0.863	0.000	0.000	0.000	0.000	0.000	0.000	0.000	0.000	0.000	0.000	0.000	0.000	0.000	0.000	52	340	1769	3981	-2.056	Error	Error	343	1426	0	0	1116	2865	0	0	0	0
2	15	19	""	"iYOR121C"	9070	28230	80	401	666	649	97	103	42	92	80	0	832	1095	796	101	107	32	100	100	0	0	0	0	0	0	0	0	0	0	0	0	0	0	0	0	0	0	0	0.416	0.572	0.476	0.399	3.051	0.673	0.826	0.000	0.000	0.000	0.000	0.000	0.000	0.000	0.000	0.000	0.000	0.000	0.000	0.000	0.000	52	340	1035	1563	-1.266	Error	Error	304	731	0	0	569	994	0	0	0	0
2	16	19	""	"iYOR138C"	9250	28220	70	370	581	430	90	98	40	96	90	0	810	991	549	100	108	35	100	100	0	0	0	0	0	0	0	0	0	0	0	0	0	0	0	0	0	0	0	0.394	0.551	0.458	0.470	1.829	0.601	0.821	0.000	0.000	0.000	0.000	0.000	0.000	0.000	0.000	0.000	0.000	0.000	0.000	0.000	0.000	32	236	990	1382	-1.342	Error	Error	280	710	0	0	491	891	0	0	0	0
2	17	19	""	"itG(CCC)O"	9450	28230	70	186	261	183	98	104	45	65	46	0	340	484	312	105	107	27	100	96	0	0	0	0	0	0	0	0	0	0	0	0	0	0	0	0	0	0	0	0.374	0.430	0.390	0.360	2.806	0.449	0.616	0.000	0.000	0.000	0.000	0.000	0.000	0.000	0.000	0.000	0.000	0.000	0.000	0.000	0.000	32	236	323	542	-1.417	Error	Error	88	235	0	0	163	379	0	0	0	0
2	18	19	""	"iYOR146W"	9650	28230	70	422	815	777	97	103	43	93	81	0	896	1524	1159	109	114	30	100	100	0	0	0	0	0	0	0	0	0	0	0	0	0	0	0	0	0	0	0	0.413	0.507	0.399	0.315	2.982	0.562	0.844	0.000	0.000	0.000	0.000	0.000	0.000	0.000	0.000	0.000	0.000	0.000	0.000	0.000	0.000	32	236	1112	2133	-1.276	Error	Error	325	787	0	0	718	1415	0	0	0	0
2	19	19	""	"iYPL228W"	9850	28230	80	352	399	260	96	101	39	88	80	0	460	496	219	104	110	32	96	92	0	0	0	0	0	0	0	0	0	0	0	0	0	0	0	0	0	0	0	0.719	0.773	0.719	0.715	2.959	0.898	0.611	0.000	0.000	0.000	0.000	0.000	0.000	0.000	0.000	0.000	0.000	0.000	0.000	0.000	0.000	52	340	612	695	-0.476	Error	Error	256	356	0	0	303	392	0	0	0	0
2	20	19	""	"iYPL224C"	10060	28220	80	1469	1465	735	103	109	44	98	98	0	2459	2372	870	111	115	34	100	100	0	0	0	0	0	0	0	0	0	0	0	0	0	0	0	0	0	0	0	0.582	0.602	0.612	0.542	1.760	0.621	0.844	0.000	0.000	0.000	0.000	0.000	0.000	0.000	0.000	0.000	0.000	0.000	0.000	0.000	0.000	52	340	3714	3623	-0.781	Error	Error	1366	2348	0	0	1362	2261	0	0	0	0
2	21	19	""	"iYPL220W"	10260	28220	80	606	610	334	102	107	44	92	88	0	1241	1197	483	109	113	27	100	100	0	0	0	0	0	0	0	0	0	0	0	0	0	0	0	0	0	0	0	0.445	0.467	0.435	0.343	2.695	0.499	0.807	0.000	0.000	0.000	0.000	0.000	0.000	0.000	0.000	0.000	0.000	0.000	0.000	0.000	0.000	52	332	1636	1596	-1.167	Error	Error	504	1132	0	0	508	1088	0	0	0	0
2	1	20	""	"iYPL203W"	6270	28440	90	4588	4692	3184	92	111	155	100	96	0	3594	3653	1907	74	92	147	100	100	0	0	0	0	0	0	0	0	0	0	0	0	0	0	0	0	0	0	0	1.277	1.285	1.154	0.973	2.063	1.432	0.854	0.000	0.000	0.000	0.000	0.000	0.000	0.000	0.000	0.000	0.000	0.000	0.000	0.000	0.000	52	414	8016	8179	0.353	Error	Error	4496	3520	0	0	4600	3579	0	0	0	0
2	2	20	""	"iYPL199C"	6460	28440	90	1804	1770	834	93	105	166	96	88	0	3829	3720	1400	75	95	318	100	100	0	0	0	0	0	0	0	0	0	0	0	0	0	0	0	0	0	0	0	0.456	0.460	0.438	0.411	1.589	0.465	0.883	0.000	0.000	0.000	0.000	0.000	0.000	0.000	0.000	0.000	0.000	0.000	0.000	0.000	0.000	52	414	5465	5322	-1.134	Error	Error	1711	3754	0	0	1677	3645	0	0	0	0
2	3	20	""	"iYPL195W"	6670	28440	90	1709	1834	1125	93	97	41	98	98	0	2048	2211	1061	76	81	26	100	100	0	0	0	0	0	0	0	0	0	0	0	0	0	0	0	0	0	0	0	0.819	0.815	0.775	0.676	1.890	0.888	0.845	0.000	0.000	0.000	0.000	0.000	0.000	0.000	0.000	0.000	0.000	0.000	0.000	0.000	0.000	52	420	3588	3876	-0.287	Error	Error	1616	1972	0	0	1741	2135	0	0	0	0
2	4	20	""	"itE(UUC)P"	6860	28440	80	213	233	96	91	98	41	88	69	0	257	263	100	78	83	26	100	96	0	0	0	0	0	0	0	0	0	0	0	0	0	0	0	0	0	0	0	0.682	0.768	0.805	0.758	2.043	0.846	0.452	0.000	0.000	0.000	0.000	0.000	0.000	0.000	0.000	0.000	0.000	0.000	0.000	0.000	0.000	52	340	301	327	-0.553	Error	Error	122	179	0	0	142	185	0	0	0	0
2	5	20	""	"iYPL177C-0"	7060	28440	80	1871	1833	938	93	98	43	100	100	0	2912	2956	1268	82	89	41	100	100	0	0	0	0	0	0	0	0	0	0	0	0	0	0	0	0	0	0	0	0.628	0.605	0.602	0.562	1.570	0.614	0.887	0.000	0.000	0.000	0.000	0.000	0.000	0.000	0.000	0.000	0.000	0.000	0.000	0.000	0.000	52	340	4608	4614	-0.671	Error	Error	1778	2830	0	0	1740	2874	0	0	0	0
2	6	20	""	"iYPL174C"	7270	28440	90	2277	2326	1654	93	98	41	100	100	0	2728	2946	1504	84	86	25	100	100	0	0	0	0	0	0	0	0	0	0	0	0	0	0	0	0	0	0	0	0.826	0.780	0.686	0.585	2.025	0.881	0.831	0.000	0.000	0.000	0.000	0.000	0.000	0.000	0.000	0.000	0.000	0.000	0.000	0.000	0.000	52	414	4828	5095	-0.276	Error	Error	2184	2644	0	0	2233	2862	0	0	0	0
2	7	20	""	"iYPL157W"	7450	28440	90	1077	1088	540	96	97	38	100	100	0	1279	1302	533	82	86	27	100	100	0	0	0	0	0	0	0	0	0	0	0	0	0	0	0	0	0	0	0	0.820	0.813	0.804	0.736	1.690	0.848	0.809	0.000	0.000	0.000	0.000	0.000	0.000	0.000	0.000	0.000	0.000	0.000	0.000	0.000	0.000	52	414	2178	2212	-0.287	Error	Error	981	1197	0	0	992	1220	0	0	0	0
2	8	20	""	"iYPL153C"	7660	28440	90	1455	1435	864	96	100	42	100	98	0	2156	2364	1180	85	90	27	100	100	0	0	0	0	0	0	0	0	0	0	0	0	0	0	0	0	0	0	0	0.656	0.588	0.538	0.500	1.682	0.605	0.839	0.000	0.000	0.000	0.000	0.000	0.000	0.000	0.000	0.000	0.000	0.000	0.000	0.000	0.000	52	420	3430	3618	-0.608	Error	Error	1359	2071	0	0	1339	2279	0	0	0	0
2	9	20	""	"iYPL149W"	7850	28440	80	314	361	211	93	101	44	94	78	0	496	518	249	86	91	25	98	96	0	0	0	0	0	0	0	0	0	0	0	0	0	0	0	0	0	0	0	0.539	0.620	0.512	0.567	2.071	0.680	0.695	0.000	0.000	0.000	0.000	0.000	0.000	0.000	0.000	0.000	0.000	0.000	0.000	0.000	0.000	52	340	631	700	-0.892	Error	Error	221	410	0	0	268	432	0	0	0	0
2	10	20	""	"itG(GCC)P2"	8060	28440	100	1136	1587	1330	95	100	40	96	95	0	1383	1946	1427	90	94	28	98	97	0	0	0	0	0	0	0	0	0	0	0	0	0	0	0	0	0	0	0	0.805	0.804	0.830	0.788	2.281	0.856	0.893	0.000	0.000	0.000	0.000	0.000	0.000	0.000	0.000	0.000	0.000	0.000	0.000	0.000	0.000	80	560	2334	3348	-0.313	Error	Error	1041	1293	0	0	1492	1856	0	0	0	0
2	11	20	""	"iYPR163C"	8270	28430	90	938	1441	1050	94	101	55	100	100	0	2179	2559	1531	92	99	41	100	100	0	0	0	0	0	0	0	0	0	0	0	0	0	0	0	0	0	0	0	0.404	0.546	0.524	0.498	2.052	0.560	0.804	0.000	0.000	0.000	0.000	0.000	0.000	0.000	0.000	0.000	0.000	0.000	0.000	0.000	0.000	52	420	2931	3814	-1.306	Error	Error	844	2087	0	0	1347	2467	0	0	0	0
2	12	20	""	"iYPR167C"	8460	28430	90	627	1400	1444	99	108	78	100	96	0	1650	2423	2013	95	107	168	100	92	0	0	0	0	0	0	0	0	0	0	0	0	0	0	0	0	0	0	0	0.340	0.559	0.521	0.473	1.856	0.628	0.913	0.000	0.000	0.000	0.000	0.000	0.000	0.000	0.000	0.000	0.000	0.000	0.000	0.000	0.000	52	420	2083	3629	-1.558	Error	Error	528	1555	0	0	1301	2328	0	0	0	0
2	13	20	""	"iYPR183W"	8650	28420	70	643	1058	799	105	118	84	93	87	0	2281	2746	1604	102	138	163	100	100	0	0	0	0	0	0	0	0	0	0	0	0	0	0	0	0	0	0	0	0.247	0.360	0.358	0.293	2.301	0.379	0.824	0.000	0.000	0.000	0.000	0.000	0.000	0.000	0.000	0.000	0.000	0.000	0.000	0.000	0.000	32	236	2717	3597	-2.018	Error	Error	538	2179	0	0	953	2644	0	0	0	0
2	14	20	""	"iYPR187W"	8870	28430	70	224	327	276	97	103	45	75	62	0	522	770	557	98	103	30	100	100	0	0	0	0	0	0	0	0	0	0	0	0	0	0	0	0	0	0	0	0.300	0.342	0.277	0.275	2.117	0.391	0.777	0.000	0.000	0.000	0.000	0.000	0.000	0.000	0.000	0.000	0.000	0.000	0.000	0.000	0.000	32	236	551	902	-1.739	Error	Error	127	424	0	0	230	672	0	0	0	0
2	15	20	""	"iYPR191W"	9060	28430	90	1804	2772	2307	99	106	44	100	100	0	3599	4442	2854	98	103	28	100	100	0	0	0	0	0	0	0	0	0	0	0	0	0	0	0	0	0	0	0	0.487	0.615	0.534	0.506	1.961	0.671	0.866	0.000	0.000	0.000	0.000	0.000	0.000	0.000	0.000	0.000	0.000	0.000	0.000	0.000	0.000	52	420	5206	7017	-1.038	Error	Error	1705	3501	0	0	2673	4344	0	0	0	0
2	16	20	""	"YALCdelta2"	9260	28430	80	479	644	524	99	102	40	92	82	0	604	709	430	99	101	28	98	98	0	0	0	0	0	0	0	0	0	0	0	0	0	0	0	0	0	0	0	0.752	0.893	0.774	0.704	2.182	1.044	0.729	0.000	0.000	0.000	0.000	0.000	0.000	0.000	0.000	0.000	0.000	0.000	0.000	0.000	0.000	52	340	885	1155	-0.410	Error	Error	380	505	0	0	545	610	0	0	0	0
2	17	20	""	"YBLWTy2-1B"	9460	28430	80	1807	6754	8573	99	102	40	98	96	0	5336	10135	10626	104	106	26	100	100	0	0	0	0	0	0	0	0	0	0	0	0	0	0	0	0	0	0	0	0.326	0.663	0.444	0.435	2.630	0.740	0.892	0.000	0.000	0.000	0.000	0.000	0.000	0.000	0.000	0.000	0.000	0.000	0.000	0.000	0.000	52	340	6940	16686	-1.615	Error	Error	1708	5232	0	0	6655	10031	0	0	0	0
2	18	20	""	"YBLWdelta10"	9660	28420	70	710	2747	3530	97	103	45	100	93	0	1428	3491	3514	106	108	26	100	100	0	0	0	0	0	0	0	0	0	0	0	0	0	0	0	0	0	0	0	0.464	0.783	0.408	0.455	2.611	0.909	0.801	0.000	0.000	0.000	0.000	0.000	0.000	0.000	0.000	0.000	0.000	0.000	0.000	0.000	0.000	32	236	1935	6035	-1.109	Error	Error	613	1322	0	0	2650	3385	0	0	0	0
2	19	20	""	"YFRWdelta10"	9860	28420	80	485	650	597	97	104	44	92	84	0	848	1138	707	108	113	34	100	100	0	0	0	0	0	0	0	0	0	0	0	0	0	0	0	0	0	0	0	0.524	0.537	0.438	0.410	2.148	0.636	0.772	0.000	0.000	0.000	0.000	0.000	0.000	0.000	0.000	0.000	0.000	0.000	0.000	0.000	0.000	52	340	1128	1583	-0.931	Error	Error	388	740	0	0	553	1030	0	0	0	0
2	20	20	""	"YGRCTy1-2A"	10060	28420	90	3991	10148	12625	101	109	51	100	100	0	7061	13749	13163	113	119	40	100	100	0	0	0	0	0	0	0	0	0	0	0	0	0	0	0	0	0	0	0	0.560	0.737	0.634	0.551	2.164	0.851	0.803	0.000	0.000	0.000	0.000	0.000	0.000	0.000	0.000	0.000	0.000	0.000	0.000	0.000	0.000	52	420	10838	23683	-0.837	Error	Error	3890	6948	0	0	10047	13636	0	0	0	0
2	21	20	""	"YHLComega1"	10260	28410	90	492	881	812	100	107	43	98	94	0	761	1126	859	113	120	46	100	100	0	0	0	0	0	0	0	0	0	0	0	0	0	0	0	0	0	0	0	0.605	0.771	0.722	0.612	2.057	0.845	0.807	0.000	0.000	0.000	0.000	0.000	0.000	0.000	0.000	0.000	0.000	0.000	0.000	0.000	0.000	52	420	1040	1794	-0.725	Error	Error	392	648	0	0	781	1013	0	0	0	0
3	1	1	"PET112"	"YBL080C"	10680	24610	110	1349	1417	530	96	102	42	100	100	0	2148	2216	898	98	104	30	100	100	0	0	0	0	0	0	0	0	0	0	0	0	0	0	0	0	0	0	0	0.611	0.624	0.620	0.628	1.403	0.589	0.883	0.000	0.000	0.000	0.000	0.000	0.000	0.000	0.000	0.000	0.000	0.000	0.000	0.000	0.000	80	644	3303	3439	-0.710	Error	Error	1253	2050	0	0	1321	2118	0	0	0	0
3	2	1	""	"YBL111C"	10890	24600	60	456	1069	1168	100	108	43	87	78	0	818	1765	1964	105	112	36	100	96	0	0	0	0	0	0	0	0	0	0	0	0	0	0	0	0	0	0	0	0.499	0.584	0.496	0.453	2.380	0.571	0.866	0.000	0.000	0.000	0.000	0.000	0.000	0.000	0.000	0.000	0.000	0.000	0.000	0.000	0.000	32	160	1069	2629	-1.002	Error	Error	356	713	0	0	969	1660	0	0	0	0
3	3	1	""	"YBR028C"	11080	24610	80	318	654	696	98	109	94	73	57	0	465	1012	1116	113	120	66	98	84	0	0	0	0	0	0	0	0	0	0	0	0	0	0	0	0	0	0	0	0.625	0.618	0.593	0.564	2.092	0.616	0.874	0.000	0.000	0.000	0.000	0.000	0.000	0.000	0.000	0.000	0.000	0.000	0.000	0.000	0.000	52	332	572	1455	-0.678	Error	Error	220	352	0	0	556	899	0	0	0	0
3	4	1	"RHK1"	"YBL082C"	11280	24610	70	714	1028	919	107	111	61	96	90	0	1112	1804	1748	119	121	39	100	96	0	0	0	0	0	0	0	0	0	0	0	0	0	0	0	0	0	0	0	0.611	0.547	0.542	0.533	1.973	0.514	0.858	0.000	0.000	0.000	0.000	0.000	0.000	0.000	0.000	0.000	0.000	0.000	0.000	0.000	0.000	32	230	1600	2606	-0.710	Error	Error	607	993	0	0	921	1685	0	0	0	0
3	5	1	""	"YBL113C"	11470	24600	70	2212	3930	3993	104	108	45	100	96	0	2302	4562	4621	117	122	44	100	96	0	0	0	0	0	0	0	0	0	0	0	0	0	0	0	0	0	0	0	0.965	0.861	0.803	0.828	1.975	0.858	0.899	0.000	0.000	0.000	0.000	0.000	0.000	0.000	0.000	0.000	0.000	0.000	0.000	0.000	0.000	32	220	4293	8271	-0.052	Error	Error	2108	2185	0	0	3826	4445	0	0	0	0
3	6	1	""	"YBR030W"	11680	24600	60	567	614	434	97	104	47	87	84	0	642	871	629	105	113	39	100	100	0	0	0	0	0	0	0	0	0	0	0	0	0	0	0	0	0	0	0	0.875	0.675	0.644	0.638	2.231	0.661	0.819	0.000	0.000	0.000	0.000	0.000	0.000	0.000	0.000	0.000	0.000	0.000	0.000	0.000	0.000	32	160	1007	1283	-0.192	Error	Error	470	537	0	0	517	766	0	0	0	0
3	7	1	"CDC27"	"YBL084C"	11890	24600	70	464	1063	1131	101	112	71	96	84	0	659	1170	987	105	111	50	100	100	0	0	0	0	0	0	0	0	0	0	0	0	0	0	0	0	0	0	0	0.655	0.903	0.661	0.665	1.838	1.039	0.838	0.000	0.000	0.000	0.000	0.000	0.000	0.000	0.000	0.000	0.000	0.000	0.000	0.000	0.000	32	220	917	2027	-0.610	Error	Error	363	554	0	0	962	1065	0	0	0	0
3	8	1	"RER2"	"YBR002C"	12070	24600	80	1899	2719	2451	102	109	67	98	98	0	984	1279	1000	101	110	87	96	90	0	0	0	0	0	0	0	0	0	0	0	0	0	0	0	0	0	0	0	2.035	2.222	2.306	2.033	1.858	2.437	0.887	0.000	0.000	0.000	0.000	0.000	0.000	0.000	0.000	0.000	0.000	0.000	0.000	0.000	0.000	52	320	2680	3795	1.025	Error	Error	1797	883	0	0	2617	1178	0	0	0	0
3	9	1	""	"YBR032W"	12260	24600	90	1008	1196	628	100	117	161	98	96	0	921	1055	473	100	103	26	100	100	0	0	0	0	0	0	0	0	0	0	0	0	0	0	0	0	0	0	0	1.106	1.148	1.089	1.089	1.420	1.196	0.898	0.000	0.000	0.000	0.000	0.000	0.000	0.000	0.000	0.000	0.000	0.000	0.000	0.000	0.000	52	400	1729	2051	0.145	Error	Error	908	821	0	0	1096	955	0	0	0	0
3	10	1	""	"YBL086C"	12470	24600	70	211	350	355	102	106	41	81	62	0	342	674	840	94	99	30	100	100	0	0	0	0	0	0	0	0	0	0	0	0	0	0	0	0	0	0	0	0.440	0.428	0.469	0.446	2.073	0.387	0.741	0.000	0.000	0.000	0.000	0.000	0.000	0.000	0.000	0.000	0.000	0.000	0.000	0.000	0.000	32	220	357	828	-1.186	Error	Error	109	248	0	0	248	580	0	0	0	0
3	11	1	""	"YBR004C"	12660	24600	80	529	1305	1811	98	108	66	96	90	0	370	522	463	97	107	61	96	82	0	0	0	0	0	0	0	0	0	0	0	0	0	0	0	0	0	0	0	1.579	2.840	2.235	2.003	2.369	4.004	0.750	0.000	0.000	0.000	0.000	0.000	0.000	0.000	0.000	0.000	0.000	0.000	0.000	0.000	0.000	52	320	704	1632	0.659	Error	Error	431	273	0	0	1207	425	0	0	0	0
3	12	1	"HMT1"	"YBR034C"	12860	24600	80	2023	2516	1569	93	108	67	100	100	0	2328	2448	1465	93	105	68	100	100	0	0	0	0	0	0	0	0	0	0	0	0	0	0	0	0	0	0	0	0.864	1.029	1.036	1.035	1.584	1.044	0.905	0.000	0.000	0.000	0.000	0.000	0.000	0.000	0.000	0.000	0.000	0.000	0.000	0.000	0.000	52	320	4165	4778	-0.212	Error	Error	1930	2235	0	0	2423	2355	0	0	0	0
3	13	1	""	"YCL044C"	13070	24600	60	150	160	61	96	103	42	56	37	0	179	229	150	94	98	28	81	68	0	0	0	0	0	0	0	0	0	0	0	0	0	0	0	0	0	0	0	0.635	0.474	0.568	0.549	2.809	0.303	0.221	0.000	0.000	0.000	0.000	0.000	0.000	0.000	0.000	0.000	0.000	0.000	0.000	0.000	0.000	32	160	139	199	-0.655	Error	Error	54	85	0	0	64	135	0	0	0	0
3	14	1	""	"YCLX03C"	13260	24600	80	928	1952	1731	96	101	41	100	100	0	1041	1682	1390	93	98	29	96	96	0	0	0	0	0	0	0	0	0	0	0	0	0	0	0	0	0	0	0	0.878	1.168	1.119	1.110	2.087	1.214	0.912	0.000	0.000	0.000	0.000	0.000	0.000	0.000	0.000	0.000	0.000	0.000	0.000	0.000	0.000	52	320	1780	3445	-0.188	Error	Error	832	948	0	0	1856	1589	0	0	0	0
3	15	1	""	"YCR022C"	13450	24600	80	2566	2929	1857	96	106	103	100	100	0	3097	3158	1943	92	102	60	100	100	0	0	0	0	0	0	0	0	0	0	0	0	0	0	0	0	0	0	0	0.822	0.924	0.934	0.937	1.541	0.932	0.918	0.000	0.000	0.000	0.000	0.000	0.000	0.000	0.000	0.000	0.000	0.000	0.000	0.000	0.000	52	306	5475	5899	-0.283	Error	Error	2470	3005	0	0	2833	3066	0	0	0	0
3	16	1	""	"YCL046W"	13640	24610	150	98	106	54	98	102	42	17	7	0	97	114	65	86	94	39	21	12	0	0	0	0	0	0	0	0	0	0	0	0	0	0	0	0	0	0	0	0.000	0.286	1.393	1.500	4.035	0.703	0.039	0.000	0.000	0.000	0.000	0.000	0.000	0.000	0.000	0.000	0.000	0.000	0.000	0.000	0.000	156	1051	11	36	Error	Error	Error	0	11	0	0	8	28	0	0	-50	0
3	17	1	""	"YCLX05C"	13860	24600	80	2715	2493	687	97	102	44	100	100	0	3124	2829	791	90	97	42	100	100	0	0	0	0	0	0	0	0	0	0	0	0	0	0	0	0	0	0	0	0.863	0.875	0.869	0.889	1.678	0.821	0.851	0.000	0.000	0.000	0.000	0.000	0.000	0.000	0.000	0.000	0.000	0.000	0.000	0.000	0.000	52	320	5652	5135	-0.213	Error	Error	2618	3034	0	0	2396	2739	0	0	0	0
3	18	1	""	"YCR024C"	14060	24600	80	1953	2296	1479	91	98	41	100	100	0	2244	2597	1727	85	94	37	100	100	0	0	0	0	0	0	0	0	0	0	0	0	0	0	0	0	0	0	0	0.862	0.878	0.910	0.875	1.671	0.860	0.857	0.000	0.000	0.000	0.000	0.000	0.000	0.000	0.000	0.000	0.000	0.000	0.000	0.000	0.000	52	296	4021	4717	-0.214	Error	Error	1862	2159	0	0	2205	2512	0	0	0	0
3	19	1	""	"YCL048W"	14240	24610	150	102	112	65	93	99	42	24	10	0	89	119	107	89	97	40	18	13	0	0	0	0	0	0	0	0	0	0	0	0	0	0	0	0	0	0	0	100000.000	0.633	1.222	1.321	4.476	0.441	0.079	0.000	0.000	0.000	0.000	0.000	0.000	0.000	0.000	0.000	0.000	0.000	0.000	0.000	0.000	156	1032	9	49	16.610	Error	Error	9	0	0	0	19	30	0	0	-50	0
3	20	1	""	"YCLX07W"	14460	24600	90	3340	3341	1743	95	99	43	100	100	0	3056	2830	1304	87	94	34	100	100	0	0	0	0	0	0	0	0	0	0	0	0	0	0	0	0	0	0	0	1.093	1.183	1.251	1.117	1.733	1.226	0.908	0.000	0.000	0.000	0.000	0.000	0.000	0.000	0.000	0.000	0.000	0.000	0.000	0.000	0.000	52	400	6214	5989	0.128	Error	Error	3245	2969	0	0	3246	2743	0	0	0	0
3	21	1	""	"YCR025C"	14670	24590	90	1648	1580	402	98	103	42	100	100	0	2576	2425	603	88	95	38	100	100	0	0	0	0	0	0	0	0	0	0	0	0	0	0	0	0	0	0	0	0.623	0.634	0.629	0.642	1.652	0.608	0.877	0.000	0.000	0.000	0.000	0.000	0.000	0.000	0.000	0.000	0.000	0.000	0.000	0.000	0.000	52	364	4038	3819	-0.683	Error	Error	1550	2488	0	0	1482	2337	0	0	0	0
3	1	2	"APA1"	"YCL050C"	10670	24810	60	136	147	47	98	103	41	46	28	0	181	190	62	98	106	31	90	68	0	0	0	0	0	0	0	0	0	0	0	0	0	0	0	0	0	0	0	0.458	0.533	0.747	0.554	2.577	0.611	0.132	0.000	0.000	0.000	0.000	0.000	0.000	0.000	0.000	0.000	0.000	0.000	0.000	0.000	0.000	32	176	121	141	-1.127	Error	Error	38	83	0	0	49	92	0	0	0	0
3	2	2	""	"YCLX09W"	10850	24810	90	1159	1094	338	101	109	53	98	96	0	2118	2003	524	111	119	62	100	100	0	0	0	0	0	0	0	0	0	0	0	0	0	0	0	0	0	0	0	0.527	0.525	0.524	0.496	1.748	0.497	0.854	0.000	0.000	0.000	0.000	0.000	0.000	0.000	0.000	0.000	0.000	0.000	0.000	0.000	0.000	52	420	3065	2885	-0.924	Error	Error	1058	2007	0	0	993	1892	0	0	0	0
3	3	2	"RSG1"	"YCR027C"	11080	24820	90	1451	1369	535	103	105	42	100	98	0	1998	1890	503	110	114	28	100	100	0	0	0	0	0	0	0	0	0	0	0	0	0	0	0	0	0	0	0	0.714	0.711	0.711	0.641	1.811	0.774	0.880	0.000	0.000	0.000	0.000	0.000	0.000	0.000	0.000	0.000	0.000	0.000	0.000	0.000	0.000	52	420	3236	3046	-0.486	Error	Error	1348	1888	0	0	1266	1780	0	0	0	0
3	4	2	""	"YDL211C"	11260	24820	50	343	355	171	102	110	44	91	83	0	596	683	317	120	126	36	100	100	0	0	0	0	0	0	0	0	0	0	0	0	0	0	0	0	0	0	0	0.506	0.449	0.420	0.457	1.899	0.388	0.546	0.000	0.000	0.000	0.000	0.000	0.000	0.000	0.000	0.000	0.000	0.000	0.000	0.000	0.000	12	104	717	816	-0.982	Error	Error	241	476	0	0	253	563	0	0	0	0
3	5	2	"AAD4"	"YDL243C"	11450	24810	60	148	158	62	104	109	46	43	25	0	242	231	70	112	123	63	71	53	0	0	0	0	0	0	0	0	0	0	0	0	0	0	0	0	0	0	0	0.338	0.454	0.548	0.578	3.655	0.635	0.162	0.000	0.000	0.000	0.000	0.000	0.000	0.000	0.000	0.000	0.000	0.000	0.000	0.000	0.000	32	176	174	173	-1.563	Error	Error	44	130	0	0	54	119	0	0	0	0
3	6	2	"LUV1"	"YDR027C"	11670	24820	80	454	861	998	98	103	41	90	86	0	774	1131	1034	107	110	28	100	100	0	0	0	0	0	0	0	0	0	0	0	0	0	0	0	0	0	0	0	0.534	0.745	0.613	0.605	2.140	0.871	0.863	0.000	0.000	0.000	0.000	0.000	0.000	0.000	0.000	0.000	0.000	0.000	0.000	0.000	0.000	52	340	1023	1787	-0.906	Error	Error	356	667	0	0	763	1024	0	0	0	0
3	7	2	""	"YDL213C"	11860	24810	70	307	478	455	102	104	46	87	75	0	592	886	833	106	110	28	100	96	0	0	0	0	0	0	0	0	0	0	0	0	0	0	0	0	0	0	0	0.422	0.482	0.472	0.503	2.467	0.481	0.756	0.000	0.000	0.000	0.000	0.000	0.000	0.000	0.000	0.000	0.000	0.000	0.000	0.000	0.000	32	236	691	1156	-1.245	Error	Error	205	486	0	0	376	780	0	0	0	0
3	8	2	"HXT15"	"YDL245C"	12050	24810	70	6440	8559	6289	100	104	43	100	100	0	8695	9018	6732	104	108	35	100	100	0	0	0	0	0	0	0	0	0	0	0	0	0	0	0	0	0	0	0	0.738	0.949	0.931	1.042	1.892	0.942	0.936	0.000	0.000	0.000	0.000	0.000	0.000	0.000	0.000	0.000	0.000	0.000	0.000	0.000	0.000	32	236	14931	17373	-0.438	Error	Error	6340	8591	0	0	8459	8914	0	0	0	0
3	9	2	""	"YDR029W"	12260	24820	80	179	334	392	101	107	42	69	44	0	386	683	684	99	103	31	96	94	0	0	0	0	0	0	0	0	0	0	0	0	0	0	0	0	0	0	0	0.272	0.399	0.321	0.303	2.654	0.490	0.807	0.000	0.000	0.000	0.000	0.000	0.000	0.000	0.000	0.000	0.000	0.000	0.000	0.000	0.000	52	340	365	817	-1.880	Error	Error	78	287	0	0	233	584	0	0	0	0
3	10	2	"GDH2"	"YDL215C"	12470	24810	60	325	488	497	95	102	41	75	68	0	473	879	910	97	98	23	100	96	0	0	0	0	0	0	0	0	0	0	0	0	0	0	0	0	0	0	0	0.612	0.503	0.457	0.447	2.446	0.498	0.776	0.000	0.000	0.000	0.000	0.000	0.000	0.000	0.000	0.000	0.000	0.000	0.000	0.000	0.000	32	176	606	1175	-0.709	Error	Error	230	376	0	0	393	782	0	0	0	0
3	11	2	""	"YDL247W"	12670	24810	60	334	650	835	100	102	40	87	84	0	530	857	1030	99	104	38	100	93	0	0	0	0	0	0	0	0	0	0	0	0	0	0	0	0	0	0	0	0.543	0.726	0.553	0.581	2.584	0.765	0.811	0.000	0.000	0.000	0.000	0.000	0.000	0.000	0.000	0.000	0.000	0.000	0.000	0.000	0.000	32	176	665	1308	-0.881	Error	Error	234	431	0	0	550	758	0	0	0	0
3	12	2	""	"YDR031W"	12870	24810	70	726	1029	773	95	99	42	100	100	0	1232	1670	1227	94	98	27	100	100	0	0	0	0	0	0	0	0	0	0	0	0	0	0	0	0	0	0	0	0.554	0.593	0.537	0.568	1.904	0.591	0.884	0.000	0.000	0.000	0.000	0.000	0.000	0.000	0.000	0.000	0.000	0.000	0.000	0.000	0.000	32	236	1769	2510	-0.851	Error	Error	631	1138	0	0	934	1576	0	0	0	0
3	13	2	"TIM22"	"YDL217C"	13060	24810	70	502	941	1125	96	102	40	96	90	0	958	1386	1371	97	102	30	100	100	0	0	0	0	0	0	0	0	0	0	0	0	0	0	0	0	0	0	0	0.472	0.656	0.622	0.563	2.033	0.737	0.862	0.000	0.000	0.000	0.000	0.000	0.000	0.000	0.000	0.000	0.000	0.000	0.000	0.000	0.000	32	236	1267	2134	-1.085	Error	Error	406	861	0	0	845	1289	0	0	0	0
3	14	2	"NTH1"	"YDR001C"	13260	24810	70	204	238	149	100	105	42	81	59	0	179	242	164	93	101	40	71	50	0	0	0	0	0	0	0	0	0	0	0	0	0	0	0	0	0	0	0	1.209	0.926	1.091	1.170	3.425	0.606	0.212	0.000	0.000	0.000	0.000	0.000	0.000	0.000	0.000	0.000	0.000	0.000	0.000	0.000	0.000	32	236	190	287	0.274	Error	Error	104	86	0	0	138	149	0	0	0	0
3	15	2	"MRH1"	"YDR033W"	13460	24810	70	346	749	1203	99	104	43	87	75	0	551	882	1357	89	97	39	93	93	0	0	0	0	0	0	0	0	0	0	0	0	0	0	0	0	0	0	0	0.535	0.820	0.747	0.643	2.454	0.771	0.270	0.000	0.000	0.000	0.000	0.000	0.000	0.000	0.000	0.000	0.000	0.000	0.000	0.000	0.000	32	236	709	1443	-0.903	Error	Error	247	462	0	0	650	793	0	0	0	0
3	16	2	""	"YDR346C"	13660	24810	70	326	377	262	99	102	41	90	78	0	453	565	333	87	95	36	100	100	0	0	0	0	0	0	0	0	0	0	0	0	0	0	0	0	0	0	0	0.620	0.582	0.478	0.458	2.486	0.613	0.635	0.000	0.000	0.000	0.000	0.000	0.000	0.000	0.000	0.000	0.000	0.000	0.000	0.000	0.000	32	236	593	756	-0.689	Error	Error	227	366	0	0	278	478	0	0	0	0
3	17	2	"LSM6"	"YDR378C"	13860	24800	80	834	815	235	96	102	44	100	100	0	1621	1589	341	89	96	29	100	100	0	0	0	0	0	0	0	0	0	0	0	0	0	0	0	0	0	0	0	0.482	0.479	0.481	0.463	1.410	0.464	0.819	0.000	0.000	0.000	0.000	0.000	0.000	0.000	0.000	0.000	0.000	0.000	0.000	0.000	0.000	52	340	2270	2219	-1.054	Error	Error	738	1532	0	0	719	1500	0	0	0	0
3	18	2	"STE14"	"YDR410C"	14060	24800	90	4977	5118	1712	96	104	46	100	100	0	4322	4163	1353	88	95	35	100	100	0	0	0	0	0	0	0	0	0	0	0	0	0	0	0	0	0	0	0	1.153	1.232	1.218	1.220	1.570	1.238	0.883	0.000	0.000	0.000	0.000	0.000	0.000	0.000	0.000	0.000	0.000	0.000	0.000	0.000	0.000	52	420	9115	9097	0.205	Error	Error	4881	4234	0	0	5022	4075	0	0	0	0
3	19	2	""	"YDR348C"	14280	24810	70	145	148	40	93	100	45	56	21	0	179	211	102	88	93	31	84	65	0	0	0	0	0	0	0	0	0	0	0	0	0	0	0	0	0	0	0	0.571	0.447	0.573	0.579	2.556	0.411	0.155	0.000	0.000	0.000	0.000	0.000	0.000	0.000	0.000	0.000	0.000	0.000	0.000	0.000	0.000	32	236	143	178	-0.807	Error	Error	52	91	0	0	55	123	0	0	0	0
3	20	2	""	"YDR380W"	14460	24800	80	3124	3480	1735	89	95	42	100	100	0	5880	5798	2744	85	91	30	100	100	0	0	0	0	0	0	0	0	0	0	0	0	0	0	0	0	0	0	0	0.524	0.594	0.602	0.571	1.530	0.586	0.901	0.000	0.000	0.000	0.000	0.000	0.000	0.000	0.000	0.000	0.000	0.000	0.000	0.000	0.000	52	340	8830	9104	-0.933	Error	Error	3035	5795	0	0	3391	5713	0	0	0	0
3	21	2	""	"YDR412W"	14660	24800	80	3338	3258	1340	95	101	44	100	100	0	5777	5366	2106	85	91	29	100	100	0	0	0	0	0	0	0	0	0	0	0	0	0	0	0	0	0	0	0	0.570	0.599	0.612	0.592	1.549	0.592	0.918	0.000	0.000	0.000	0.000	0.000	0.000	0.000	0.000	0.000	0.000	0.000	0.000	0.000	0.000	52	332	8935	8444	-0.812	Error	Error	3243	5692	0	0	3163	5281	0	0	0	0
3	1	3	"TCM10"	"YDR350C"	10660	25020	100	1928	1786	536	106	132	198	98	96	0	3197	3020	627	109	143	293	100	100	0	0	0	0	0	0	0	0	0	0	0	0	0	0	0	0	0	0	0	0.590	0.577	0.581	0.543	1.428	0.591	0.886	0.000	0.000	0.000	0.000	0.000	0.000	0.000	0.000	0.000	0.000	0.000	0.000	0.000	0.000	80	546	4910	4591	-0.761	Error	Error	1822	3088	0	0	1680	2911	0	0	0	0
3	2	3	"RPP2B"	"YDR382W"	10850	25020	90	843	782	291	101	116	151	90	88	0	1032	1008	276	112	128	222	100	90	0	0	0	0	0	0	0	0	0	0	0	0	0	0	0	0	0	0	0	0.807	0.760	0.763	0.604	2.734	0.779	0.809	0.000	0.000	0.000	0.000	0.000	0.000	0.000	0.000	0.000	0.000	0.000	0.000	0.000	0.000	52	414	1662	1577	-0.310	Error	Error	742	920	0	0	681	896	0	0	0	0
3	3	3	"ERD1"	"YDR414C"	11050	25020	80	1770	1502	669	100	106	44	100	100	0	3350	2802	1246	111	115	36	98	98	0	0	0	0	0	0	0	0	0	0	0	0	0	0	0	0	0	0	0	0.516	0.521	0.537	0.531	2.199	0.499	0.876	0.000	0.000	0.000	0.000	0.000	0.000	0.000	0.000	0.000	0.000	0.000	0.000	0.000	0.000	52	340	4909	4093	-0.956	Error	Error	1670	3239	0	0	1402	2691	0	0	0	0
3	4	3	""	"YDR352W"	11260	25020	80	1911	1983	1050	100	129	343	98	92	0	1937	2088	942	117	150	521	96	80	0	0	0	0	0	0	0	0	0	0	0	0	0	0	0	0	0	0	0	0.995	0.955	1.015	0.940	1.739	0.984	0.863	0.000	0.000	0.000	0.000	0.000	0.000	0.000	0.000	0.000	0.000	0.000	0.000	0.000	0.000	52	340	3631	3854	-0.007	Error	Error	1811	1820	0	0	1883	1971	0	0	0	0
3	5	3	""	"YDR384C"	11460	25030	100	1408	1342	509	102	106	46	100	97	0	2076	2036	619	116	121	35	100	100	0	0	0	0	0	0	0	0	0	0	0	0	0	0	0	0	0	0	0	0.666	0.646	0.644	0.579	1.700	0.643	0.834	0.000	0.000	0.000	0.000	0.000	0.000	0.000	0.000	0.000	0.000	0.000	0.000	0.000	0.000	80	529	3266	3160	-0.586	Error	Error	1306	1960	0	0	1240	1920	0	0	0	0
3	6	3	"SYF1"	"YDR416W"	11650	25020	80	1603	2079	1465	105	108	45	100	98	0	3259	3519	2403	112	122	116	100	100	0	0	0	0	0	0	0	0	0	0	0	0	0	0	0	0	0	0	0	0.476	0.579	0.586	0.552	2.133	0.575	0.887	0.000	0.000	0.000	0.000	0.000	0.000	0.000	0.000	0.000	0.000	0.000	0.000	0.000	0.000	52	340	4645	5381	-1.071	Error	Error	1498	3147	0	0	1974	3407	0	0	0	0
3	7	3	"SHC1"	"YER096W"	11850	25020	80	2151	2276	1142	100	106	49	100	100	0	2982	2991	1211	109	115	55	100	100	0	0	0	0	0	0	0	0	0	0	0	0	0	0	0	0	0	0	0	0.714	0.755	0.698	0.695	1.644	0.790	0.807	0.000	0.000	0.000	0.000	0.000	0.000	0.000	0.000	0.000	0.000	0.000	0.000	0.000	0.000	52	340	4924	5058	-0.486	Error	Error	2051	2873	0	0	2176	2882	0	0	0	0
3	8	3	"LCP5"	"YER127W"	12060	25020	90	2475	2127	882	105	108	41	100	100	0	2933	2573	1052	108	112	34	98	98	0	0	0	0	0	0	0	0	0	0	0	0	0	0	0	0	0	0	0	0.839	0.820	0.842	0.890	2.010	0.811	0.912	0.000	0.000	0.000	0.000	0.000	0.000	0.000	0.000	0.000	0.000	0.000	0.000	0.000	0.000	52	420	5195	4487	-0.253	Error	Error	2370	2825	0	0	2022	2465	0	0	0	0
3	9	3	"BUR6"	"YER159C"	12250	25010	90	881	866	280	99	114	116	98	96	0	1405	1311	434	106	123	185	98	94	0	0	0	0	0	0	0	0	0	0	0	0	0	0	0	0	0	0	0	0.602	0.637	0.620	0.641	1.664	0.609	0.830	0.000	0.000	0.000	0.000	0.000	0.000	0.000	0.000	0.000	0.000	0.000	0.000	0.000	0.000	52	420	2081	1972	-0.732	Error	Error	782	1299	0	0	767	1205	0	0	0	0
3	10	3	"UBP9"	"YER098W"	12440	25010	90	2582	3393	2269	96	108	115	98	98	0	2932	3491	2565	101	119	185	84	82	0	0	0	0	0	0	0	0	0	0	0	0	0	0	0	0	0	0	0	0.878	0.973	0.996	1.285	2.821	0.928	0.891	0.000	0.000	0.000	0.000	0.000	0.000	0.000	0.000	0.000	0.000	0.000	0.000	0.000	0.000	52	420	5317	6687	-0.187	Error	Error	2486	2831	0	0	3297	3390	0	0	0	0
3	11	3	"PAK1"	"YER129W"	12660	25010	70	5027	5431	3316	94	103	43	100	100	0	3418	3762	2144	100	105	31	100	100	0	0	0	0	0	0	0	0	0	0	0	0	0	0	0	0	0	0	0	1.487	1.457	1.378	1.369	1.866	1.500	0.852	0.000	0.000	0.000	0.000	0.000	0.000	0.000	0.000	0.000	0.000	0.000	0.000	0.000	0.000	32	236	8251	8999	0.572	Error	Error	4933	3318	0	0	5337	3662	0	0	0	0
3	12	3	"SPT2"	"YER161C"	12850	25020	80	3814	3564	1751	107	112	48	100	100	0	6930	6293	2404	106	113	51	100	100	0	0	0	0	0	0	0	0	0	0	0	0	0	0	0	0	0	0	0	0.543	0.559	0.524	0.512	1.580	0.571	0.855	0.000	0.000	0.000	0.000	0.000	0.000	0.000	0.000	0.000	0.000	0.000	0.000	0.000	0.000	52	340	10531	9644	-0.880	Error	Error	3707	6824	0	0	3457	6187	0	0	0	0
3	13	3	"UBC6"	"YER100W"	13060	25010	90	2933	2896	1031	104	107	43	100	100	0	3282	3215	584	104	111	41	100	100	0	0	0	0	0	0	0	0	0	0	0	0	0	0	0	0	0	0	0	0.890	0.897	0.917	0.832	1.479	0.973	0.841	0.000	0.000	0.000	0.000	0.000	0.000	0.000	0.000	0.000	0.000	0.000	0.000	0.000	0.000	52	414	6007	5903	-0.168	Error	Error	2829	3178	0	0	2792	3111	0	0	0	0
3	14	3	"RPS26B"	"YER131W"	13240	25020	90	1839	1935	901	98	105	46	98	98	0	2580	2570	1186	102	107	37	100	100	0	0	0	0	0	0	0	0	0	0	0	0	0	0	0	0	0	0	0	0.703	0.744	0.752	0.768	1.710	0.719	0.858	0.000	0.000	0.000	0.000	0.000	0.000	0.000	0.000	0.000	0.000	0.000	0.000	0.000	0.000	52	414	4219	4305	-0.509	Error	Error	1741	2478	0	0	1837	2468	0	0	0	0
3	15	3	""	"YER163C"	13460	25010	80	2177	2082	644	97	103	42	100	100	0	4235	3778	1096	96	102	36	100	100	0	0	0	0	0	0	0	0	0	0	0	0	0	0	0	0	0	0	0	0.503	0.539	0.517	0.526	1.537	0.525	0.885	0.000	0.000	0.000	0.000	0.000	0.000	0.000	0.000	0.000	0.000	0.000	0.000	0.000	0.000	52	340	6219	5667	-0.993	Error	Error	2080	4139	0	0	1985	3682	0	0	0	0
3	16	3	"RPS8B"	"YER102W"	13650	25010	90	2531	2475	576	99	105	45	100	100	0	3687	3364	1060	96	103	39	100	100	0	0	0	0	0	0	0	0	0	0	0	0	0	0	0	0	0	0	0	0.677	0.727	0.708	0.772	1.611	0.689	0.898	0.000	0.000	0.000	0.000	0.000	0.000	0.000	0.000	0.000	0.000	0.000	0.000	0.000	0.000	52	420	6023	5644	-0.562	Error	Error	2432	3591	0	0	2376	3268	0	0	0	0
3	17	3	"GLC7"	"YER133W"	13850	25010	90	3035	3183	1266	98	102	44	100	100	0	3549	3440	1278	91	101	41	100	100	0	0	0	0	0	0	0	0	0	0	0	0	0	0	0	0	0	0	0	0.849	0.921	0.868	0.921	1.632	0.850	0.822	0.000	0.000	0.000	0.000	0.000	0.000	0.000	0.000	0.000	0.000	0.000	0.000	0.000	0.000	52	420	6395	6434	-0.236	Error	Error	2937	3458	0	0	3085	3349	0	0	0	0
3	18	3	"PAB1"	"YER165W"	14050	25010	80	2411	2389	1345	102	107	46	100	98	0	5480	5508	2616	93	100	35	100	100	0	0	0	0	0	0	0	0	0	0	0	0	0	0	0	0	0	0	0	0.429	0.422	0.421	0.372	1.861	0.432	0.906	0.000	0.000	0.000	0.000	0.000	0.000	0.000	0.000	0.000	0.000	0.000	0.000	0.000	0.000	52	340	7696	7702	-1.222	Error	Error	2309	5387	0	0	2287	5415	0	0	0	0
3	19	3	"CDC43"	"YGL155W"	14260	25010	90	5580	5493	2330	102	105	46	100	100	0	5093	5270	1634	92	96	29	100	100	0	0	0	0	0	0	0	0	0	0	0	0	0	0	0	0	0	0	0	1.095	1.041	1.083	0.946	1.588	1.120	0.855	0.000	0.000	0.000	0.000	0.000	0.000	0.000	0.000	0.000	0.000	0.000	0.000	0.000	0.000	52	420	10479	10569	0.131	Error	Error	5478	5001	0	0	5391	5178	0	0	0	0
3	20	3	"COX4"	"YGL187C"	14450	25010	90	1530	1527	534	101	104	44	100	100	0	3209	3037	975	89	95	34	100	100	0	0	0	0	0	0	0	0	0	0	0	0	0	0	0	0	0	0	0	0.458	0.484	0.481	0.466	1.589	0.460	0.834	0.000	0.000	0.000	0.000	0.000	0.000	0.000	0.000	0.000	0.000	0.000	0.000	0.000	0.000	52	420	4549	4374	-1.127	Error	Error	1429	3120	0	0	1426	2948	0	0	0	0
3	21	3	""	"YGL219C"	14650	25010	80	3669	3798	1968	95	107	88	100	100	0	6123	6520	3191	85	105	237	100	100	0	0	0	0	0	0	0	0	0	0	0	0	0	0	0	0	0	0	0	0.592	0.575	0.576	0.551	1.702	0.545	0.766	0.000	0.000	0.000	0.000	0.000	0.000	0.000	0.000	0.000	0.000	0.000	0.000	0.000	0.000	52	340	9612	10138	-0.757	Error	Error	3574	6038	0	0	3703	6435	0	0	0	0
3	1	4	""	"YGL157W"	10650	25230	80	1946	1885	782	102	105	42	100	100	0	3168	2899	804	105	108	29	100	100	0	0	0	0	0	0	0	0	0	0	0	0	0	0	0	0	0	0	0	0.602	0.638	0.663	0.562	1.631	0.666	0.878	0.000	0.000	0.000	0.000	0.000	0.000	0.000	0.000	0.000	0.000	0.000	0.000	0.000	0.000	52	340	4907	4577	-0.732	Error	Error	1844	3063	0	0	1783	2794	0	0	0	0
3	2	4	"RPS26A"	"YGL189C"	10850	25230	80	2020	1943	795	104	106	45	100	100	0	2924	2817	783	110	114	33	100	100	0	0	0	0	0	0	0	0	0	0	0	0	0	0	0	0	0	0	0	0.681	0.679	0.691	0.605	1.652	0.734	0.857	0.000	0.000	0.000	0.000	0.000	0.000	0.000	0.000	0.000	0.000	0.000	0.000	0.000	0.000	52	340	4730	4546	-0.555	Error	Error	1916	2814	0	0	1839	2707	0	0	0	0
3	3	4	"NIF3"	"YGL221C"	11050	25230	90	1448	1350	443	100	106	43	100	100	0	2602	2502	670	113	118	44	100	100	0	0	0	0	0	0	0	0	0	0	0	0	0	0	0	0	0	0	0	0.542	0.523	0.507	0.490	1.612	0.505	0.870	0.000	0.000	0.000	0.000	0.000	0.000	0.000	0.000	0.000	0.000	0.000	0.000	0.000	0.000	52	420	3837	3639	-0.885	Error	Error	1348	2489	0	0	1250	2389	0	0	0	0
3	4	4	""	"YGL159W"	11250	25230	80	1459	1540	723	99	106	42	100	98	0	1994	2178	924	115	121	36	100	100	0	0	0	0	0	0	0	0	0	0	0	0	0	0	0	0	0	0	0	0.724	0.698	0.655	0.667	1.842	0.654	0.783	0.000	0.000	0.000	0.000	0.000	0.000	0.000	0.000	0.000	0.000	0.000	0.000	0.000	0.000	52	340	3239	3504	-0.466	Error	Error	1360	1879	0	0	1441	2063	0	0	0	0
3	5	4	"COX13"	"YGL191W"	11440	25220	90	821	815	267	103	107	43	98	98	0	1261	1147	415	117	122	39	96	94	0	0	0	0	0	0	0	0	0	0	0	0	0	0	0	0	0	0	0	0.628	0.691	0.641	0.758	2.623	0.621	0.731	0.000	0.000	0.000	0.000	0.000	0.000	0.000	0.000	0.000	0.000	0.000	0.000	0.000	0.000	52	415	1862	1742	-0.672	Error	Error	718	1144	0	0	712	1030	0	0	0	0
3	6	4	""	"YGL223C"	11650	25220	80	4030	3498	1542	100	105	40	100	100	0	4976	4634	1394	117	119	32	100	100	0	0	0	0	0	0	0	0	0	0	0	0	0	0	0	0	0	0	0	0.809	0.752	0.757	0.669	1.688	0.787	0.865	0.000	0.000	0.000	0.000	0.000	0.000	0.000	0.000	0.000	0.000	0.000	0.000	0.000	0.000	52	340	8789	7915	-0.306	Error	Error	3930	4859	0	0	3398	4517	0	0	0	0
3	7	4	""	"YGL161C"	11850	25230	80	1246	1232	532	103	104	42	100	96	0	2797	2626	855	110	112	28	100	100	0	0	0	0	0	0	0	0	0	0	0	0	0	0	0	0	0	0	0	0.425	0.449	0.456	0.395	1.794	0.484	0.796	0.000	0.000	0.000	0.000	0.000	0.000	0.000	0.000	0.000	0.000	0.000	0.000	0.000	0.000	52	340	3830	3645	-1.233	Error	Error	1143	2687	0	0	1129	2516	0	0	0	0
3	8	4	""	"YGL193C"	12050	25220	80	977	1046	431	97	101	39	98	98	0	1105	1085	374	105	108	33	98	98	0	0	0	0	0	0	0	0	0	0	0	0	0	0	0	0	0	0	0	0.880	0.968	0.888	0.898	2.022	0.982	0.704	0.000	0.000	0.000	0.000	0.000	0.000	0.000	0.000	0.000	0.000	0.000	0.000	0.000	0.000	52	340	1880	1929	-0.184	Error	Error	880	1000	0	0	949	980	0	0	0	0
3	9	4	"GOG5"	"YGL225W"	12240	25220	90	4002	3662	1328	99	105	41	100	100	0	3296	2853	1149	106	110	35	100	98	0	0	0	0	0	0	0	0	0	0	0	0	0	0	0	0	0	0	0	1.224	1.297	1.317	1.437	2.060	1.248	0.878	0.000	0.000	0.000	0.000	0.000	0.000	0.000	0.000	0.000	0.000	0.000	0.000	0.000	0.000	52	420	7093	6310	0.291	Error	Error	3903	3190	0	0	3563	2747	0	0	0	0
3	10	4	"RNH70"	"YGR276C"	12450	25230	90	1949	1761	1091	97	107	106	94	90	0	3896	3704	1706	102	121	257	98	96	0	0	0	0	0	0	0	0	0	0	0	0	0	0	0	0	0	0	0	0.488	0.462	0.452	0.369	1.935	0.498	0.860	0.000	0.000	0.000	0.000	0.000	0.000	0.000	0.000	0.000	0.000	0.000	0.000	0.000	0.000	52	420	5646	5266	-1.035	Error	Error	1852	3794	0	0	1664	3602	0	0	0	0
3	11	4	""	"YHL012W"	12640	25220	80	8575	7391	4071	96	101	44	100	98	0	3320	3291	1336	102	110	43	100	100	0	0	0	0	0	0	0	0	0	0	0	0	0	0	0	0	0	0	0	2.635	2.288	2.341	1.905	2.165	2.616	0.836	0.000	0.000	0.000	0.000	0.000	0.000	0.000	0.000	0.000	0.000	0.000	0.000	0.000	0.000	52	340	11697	10484	1.398	Error	Error	8479	3218	0	0	7295	3189	0	0	0	0
3	12	4	""	"YHL044W"	12840	25230	80	1537	1418	608	104	109	53	100	100	0	2568	2412	593	100	110	47	100	100	0	0	0	0	0	0	0	0	0	0	0	0	0	0	0	0	0	0	0	0.581	0.568	0.586	0.493	1.642	0.620	0.805	0.000	0.000	0.000	0.000	0.000	0.000	0.000	0.000	0.000	0.000	0.000	0.000	0.000	0.000	52	340	3901	3626	-0.784	Error	Error	1433	2468	0	0	1314	2312	0	0	0	0
3	13	4	""	"YGR278W"	13050	25220	80	4706	4438	1811	97	103	41	100	100	0	5589	4814	2028	103	108	30	100	100	0	0	0	0	0	0	0	0	0	0	0	0	0	0	0	0	0	0	0	0.840	0.921	0.893	0.934	1.720	0.907	0.894	0.000	0.000	0.000	0.000	0.000	0.000	0.000	0.000	0.000	0.000	0.000	0.000	0.000	0.000	52	340	10095	9052	-0.251	Error	Error	4609	5486	0	0	4341	4711	0	0	0	0
3	14	4	"YLF2"	"YHL014C"	13240	25220	90	8167	7083	2892	100	105	42	100	100	0	3502	3007	1228	103	111	37	100	98	0	0	0	0	0	0	0	0	0	0	0	0	0	0	0	0	0	0	0	2.373	2.405	2.427	2.601	2.114	2.451	0.902	0.000	0.000	0.000	0.000	0.000	0.000	0.000	0.000	0.000	0.000	0.000	0.000	0.000	0.000	52	420	11466	9887	1.247	Error	Error	8067	3399	0	0	6983	2904	0	0	0	0
3	15	4	""	"YHL046C"	13440	25220	80	14706	13486	5087	99	101	41	100	100	0	10689	9893	3627	94	99	30	100	100	0	0	0	0	0	0	0	0	0	0	0	0	0	0	0	0	0	0	0	1.379	1.366	1.383	1.342	1.787	1.385	0.866	0.000	0.000	0.000	0.000	0.000	0.000	0.000	0.000	0.000	0.000	0.000	0.000	0.000	0.000	52	340	25202	23186	0.463	Error	Error	14607	10595	0	0	13387	9799	0	0	0	0
3	16	4	""	"YGR280C"	13660	25220	80	3061	2661	1064	99	102	42	100	100	0	4618	4264	1052	94	100	36	100	100	0	0	0	0	0	0	0	0	0	0	0	0	0	0	0	0	0	0	0	0.655	0.614	0.629	0.560	1.471	0.652	0.875	0.000	0.000	0.000	0.000	0.000	0.000	0.000	0.000	0.000	0.000	0.000	0.000	0.000	0.000	52	340	7486	6732	-0.611	Error	Error	2962	4524	0	0	2562	4170	0	0	0	0
3	17	4	"DUR3"	"YHL016C"	13840	25220	80	15998	13784	7337	104	108	42	100	100	0	5950	5296	2941	93	101	42	98	94	0	0	0	0	0	0	0	0	0	0	0	0	0	0	0	0	0	0	0	2.714	2.629	2.649	3.306	2.519	2.669	0.918	0.000	0.000	0.000	0.000	0.000	0.000	0.000	0.000	0.000	0.000	0.000	0.000	0.000	0.000	52	340	21751	18883	1.440	Error	Error	15894	5857	0	0	13680	5203	0	0	0	0
3	18	4	"COS8"	"YHL048W"	14050	25220	80	11011	10749	4125	97	107	49	100	100	0	9963	9661	3670	89	97	35	100	100	0	0	0	0	0	0	0	0	0	0	0	0	0	0	0	0	0	0	0	1.105	1.113	1.095	1.072	1.672	1.124	0.866	0.000	0.000	0.000	0.000	0.000	0.000	0.000	0.000	0.000	0.000	0.000	0.000	0.000	0.000	52	340	20788	20224	0.144	Error	Error	10914	9874	0	0	10652	9572	0	0	0	0
3	19	4	"BGL2"	"YGR282C"	14240	25210	80	5296	4977	1423	93	101	43	100	100	0	4374	4003	961	90	95	33	100	100	0	0	0	0	0	0	0	0	0	0	0	0	0	0	0	0	0	0	0	1.215	1.248	1.282	1.214	1.475	1.265	0.885	0.000	0.000	0.000	0.000	0.000	0.000	0.000	0.000	0.000	0.000	0.000	0.000	0.000	0.000	52	340	9487	8797	0.280	Error	Error	5203	4284	0	0	4884	3913	0	0	0	0
3	20	4	""	"YHL018W"	14440	25210	80	4322	3852	1274	96	101	38	100	100	0	2799	2649	639	88	96	38	100	100	0	0	0	0	0	0	0	0	0	0	0	0	0	0	0	0	0	0	0	1.559	1.467	1.503	1.394	1.469	1.565	0.888	0.000	0.000	0.000	0.000	0.000	0.000	0.000	0.000	0.000	0.000	0.000	0.000	0.000	0.000	52	340	6937	6317	0.640	Error	Error	4226	2711	0	0	3756	2561	0	0	0	0
3	21	4	""	"YHL050C"	14660	25210	80	27073	26288	12339	95	102	42	100	100	0	27917	28286	13348	85	92	36	100	100	0	0	0	0	0	0	0	0	0	0	0	0	0	0	0	0	0	0	0	0.969	0.929	0.896	0.918	1.606	0.918	0.877	0.000	0.000	0.000	0.000	0.000	0.000	0.000	0.000	0.000	0.000	0.000	0.000	0.000	0.000	52	332	54810	54394	-0.045	Error	Error	26978	27832	0	0	26193	28201	0	0	0	0
3	1	5	""	"YIL086C"	10660	25430	60	132	156	82	101	109	46	37	34	0	162	246	188	103	108	31	65	50	0	0	0	0	0	0	0	0	0	0	0	0	0	0	0	0	0	0	0	0.525	0.385	0.396	0.467	4.929	0.290	0.221	0.000	0.000	0.000	0.000	0.000	0.000	0.000	0.000	0.000	0.000	0.000	0.000	0.000	0.000	32	176	90	198	-0.928	Error	Error	31	59	0	0	55	143	0	0	0	0
3	2	5	"RHO3"	"YIL118W"	10840	25440	90	900	922	529	102	106	43	100	96	0	1347	1442	617	107	112	30	100	100	0	0	0	0	0	0	0	0	0	0	0	0	0	0	0	0	0	0	0	0.644	0.614	0.583	0.508	1.997	0.622	0.743	0.000	0.000	0.000	0.000	0.000	0.000	0.000	0.000	0.000	0.000	0.000	0.000	0.000	0.000	52	420	2038	2155	-0.636	Error	Error	798	1240	0	0	820	1335	0	0	0	0
3	3	5	"DNA43"	"YIL150C"	11050	25440	80	2183	2107	965	103	107	39	100	100	0	3738	3485	1421	112	116	26	100	100	0	0	0	0	0	0	0	0	0	0	0	0	0	0	0	0	0	0	0	0.574	0.594	0.594	0.573	1.837	0.587	0.841	0.000	0.000	0.000	0.000	0.000	0.000	0.000	0.000	0.000	0.000	0.000	0.000	0.000	0.000	52	340	5706	5377	-0.802	Error	Error	2080	3626	0	0	2004	3373	0	0	0	0
3	4	5	""	"YIL088C"	11250	25440	80	4123	3456	1709	100	107	41	100	100	0	4151	3657	1689	117	119	29	100	98	0	0	0	0	0	0	0	0	0	0	0	0	0	0	0	0	0	0	0	0.997	0.948	0.983	0.959	1.837	0.955	0.920	0.000	0.000	0.000	0.000	0.000	0.000	0.000	0.000	0.000	0.000	0.000	0.000	0.000	0.000	52	340	8057	6896	-0.004	Error	Error	4023	4034	0	0	3356	3540	0	0	0	0
3	5	5	""	"YIL120W"	11440	25430	80	3301	2846	1528	102	106	43	100	98	0	3608	3270	1460	117	119	32	100	100	0	0	0	0	0	0	0	0	0	0	0	0	0	0	0	0	0	0	0	0.916	0.870	0.849	0.751	2.034	0.906	0.892	0.000	0.000	0.000	0.000	0.000	0.000	0.000	0.000	0.000	0.000	0.000	0.000	0.000	0.000	52	340	6690	5897	-0.126	Error	Error	3199	3491	0	0	2744	3153	0	0	0	0
3	6	5	""	"YIL152W"	11640	25430	90	2119	2274	1219	97	105	59	100	98	0	1444	1532	802	114	116	32	98	98	0	0	0	0	0	0	0	0	0	0	0	0	0	0	0	0	0	0	0	1.520	1.535	1.450	1.532	2.429	1.545	0.763	0.000	0.000	0.000	0.000	0.000	0.000	0.000	0.000	0.000	0.000	0.000	0.000	0.000	0.000	52	420	3352	3595	0.604	Error	Error	2022	1330	0	0	2177	1418	0	0	0	0
3	7	5	""	"YIL090W"	11840	25430	70	2384	2398	1631	101	107	48	100	100	0	2205	2465	1538	111	126	84	100	100	0	0	0	0	0	0	0	0	0	0	0	0	0	0	0	0	0	0	0	1.090	0.976	1.001	0.883	1.897	0.898	0.790	0.000	0.000	0.000	0.000	0.000	0.000	0.000	0.000	0.000	0.000	0.000	0.000	0.000	0.000	32	236	4377	4651	0.125	Error	Error	2283	2094	0	0	2297	2354	0	0	0	0
3	8	5	""	"YIL122W"	12050	25430	80	4042	3740	1703	96	101	42	100	100	0	3031	3021	899	102	106	30	100	100	0	0	0	0	0	0	0	0	0	0	0	0	0	0	0	0	0	0	0	1.347	1.248	1.300	1.090	1.768	1.364	0.864	0.000	0.000	0.000	0.000	0.000	0.000	0.000	0.000	0.000	0.000	0.000	0.000	0.000	0.000	52	340	6875	6563	0.430	Error	Error	3946	2929	0	0	3644	2919	0	0	0	0
3	9	5	"IMP2'"	"YIL154C"	12240	25430	80	452	429	153	104	109	47	94	88	0	773	692	235	103	107	28	100	96	0	0	0	0	0	0	0	0	0	0	0	0	0	0	0	0	0	0	0	0.519	0.552	0.500	0.532	2.000	0.551	0.777	0.000	0.000	0.000	0.000	0.000	0.000	0.000	0.000	0.000	0.000	0.000	0.000	0.000	0.000	52	340	1018	914	-0.945	Error	Error	348	670	0	0	325	589	0	0	0	0
3	10	5	""	"YIL092W"	12440	25430	80	4567	4806	2765	96	102	44	100	100	0	4893	4886	2650	110	115	37	100	98	0	0	0	0	0	0	0	0	0	0	0	0	0	0	0	0	0	0	0	0.935	0.986	1.017	1.038	2.397	1.004	0.885	0.000	0.000	0.000	0.000	0.000	0.000	0.000	0.000	0.000	0.000	0.000	0.000	0.000	0.000	52	340	9254	9486	-0.097	Error	Error	4471	4783	0	0	4710	4776	0	0	0	0
3	11	5	"AYR1"	"YIL124W"	12640	25430	90	1999	1816	693	100	104	42	96	96	0	3040	2700	898	106	113	38	100	100	0	0	0	0	0	0	0	0	0	0	0	0	0	0	0	0	0	0	0	0.647	0.662	0.651	0.591	2.187	0.652	0.861	0.000	0.000	0.000	0.000	0.000	0.000	0.000	0.000	0.000	0.000	0.000	0.000	0.000	0.000	52	420	4833	4310	-0.628	Error	Error	1899	2934	0	0	1716	2594	0	0	0	0
3	12	5	"UBP7"	"YIL156W"	12830	25430	70	5204	6480	4148	104	111	70	100	100	0	3080	4050	2342	100	111	59	100	100	0	0	0	0	0	0	0	0	0	0	0	0	0	0	0	0	0	0	0	1.711	1.614	1.528	1.526	1.509	1.626	0.857	0.000	0.000	0.000	0.000	0.000	0.000	0.000	0.000	0.000	0.000	0.000	0.000	0.000	0.000	32	236	8080	10326	0.775	Error	Error	5100	2980	0	0	6376	3950	0	0	0	0
3	13	5	"BNA1"	"YJR025C"	13040	25420	70	716	1159	884	100	105	42	100	100	0	1100	1949	1620	98	105	32	100	100	0	0	0	0	0	0	0	0	0	0	0	0	0	0	0	0	0	0	0	0.615	0.572	0.596	0.600	1.615	0.538	0.876	0.000	0.000	0.000	0.000	0.000	0.000	0.000	0.000	0.000	0.000	0.000	0.000	0.000	0.000	32	236	1618	2910	-0.702	Error	Error	616	1002	0	0	1059	1851	0	0	0	0
3	14	5	"CDC8"	"YJR057W"	13240	25430	80	835	1463	1269	101	104	41	100	96	0	1877	2890	2298	101	108	38	100	100	0	0	0	0	0	0	0	0	0	0	0	0	0	0	0	0	0	0	0	0.413	0.488	0.486	0.416	1.954	0.507	0.923	0.000	0.000	0.000	0.000	0.000	0.000	0.000	0.000	0.000	0.000	0.000	0.000	0.000	0.000	52	340	2510	4151	-1.275	Error	Error	734	1776	0	0	1362	2789	0	0	0	0
3	15	5	"GRR1"	"YJR090C"	13440	25420	80	256	505	661	94	99	44	88	71	0	355	611	678	93	116	289	42	21	0	0	0	0	0	0	0	0	0	0	0	0	0	0	0	0	0	0	0	0.618	0.793	0.797	0.719	3.073	0.587	0.458	0.000	0.000	0.000	0.000	0.000	0.000	0.000	0.000	0.000	0.000	0.000	0.000	0.000	0.000	52	340	424	929	-0.694	Error	Error	162	262	0	0	411	518	0	0	0	0
3	16	5	""	"YJR027W"	13650	25430	80	257	580	920	97	106	47	80	73	0	420	758	1234	92	98	35	88	80	0	0	0	0	0	0	0	0	0	0	0	0	0	0	0	0	0	0	0	0.488	0.725	0.680	0.699	2.379	0.703	0.707	0.000	0.000	0.000	0.000	0.000	0.000	0.000	0.000	0.000	0.000	0.000	0.000	0.000	0.000	52	340	488	1149	-1.036	Error	Error	160	328	0	0	483	666	0	0	0	0
3	17	5	"PTK2"	"YJR059W"	13840	25420	70	281	642	1150	93	101	44	93	90	0	426	1046	2467	86	93	28	100	100	0	0	0	0	0	0	0	0	0	0	0	0	0	0	0	0	0	0	0	0.553	0.572	0.605	0.571	2.120	0.433	0.737	0.000	0.000	0.000	0.000	0.000	0.000	0.000	0.000	0.000	0.000	0.000	0.000	0.000	0.000	32	236	528	1509	-0.855	Error	Error	188	340	0	0	549	960	0	0	0	0
3	18	5	"BUD4"	"YJR092W"	14060	25420	60	274	374	305	91	98	42	90	81	0	322	415	279	85	94	34	100	93	0	0	0	0	0	0	0	0	0	0	0	0	0	0	0	0	0	0	0	0.772	0.858	0.831	0.741	2.679	0.894	0.591	0.000	0.000	0.000	0.000	0.000	0.000	0.000	0.000	0.000	0.000	0.000	0.000	0.000	0.000	32	176	420	613	-0.373	Error	Error	183	237	0	0	283	330	0	0	0	0
3	19	5	""	"YJR029W"	14250	25430	70	672	826	661	98	103	44	90	84	0	822	1032	730	91	99	39	100	100	0	0	0	0	0	0	0	0	0	0	0	0	0	0	0	0	0	0	0	0.785	0.774	0.804	0.628	2.201	0.815	0.835	0.000	0.000	0.000	0.000	0.000	0.000	0.000	0.000	0.000	0.000	0.000	0.000	0.000	0.000	32	236	1305	1669	-0.349	Error	Error	574	731	0	0	728	941	0	0	0	0
3	20	5	""	"YJR061W"	14460	25420	60	266	411	365	94	101	40	81	81	0	274	453	361	90	99	42	96	84	0	0	0	0	0	0	0	0	0	0	0	0	0	0	0	0	0	0	0	0.935	0.873	1.122	0.910	2.903	0.865	0.503	0.000	0.000	0.000	0.000	0.000	0.000	0.000	0.000	0.000	0.000	0.000	0.000	0.000	0.000	32	176	356	680	-0.097	Error	Error	172	184	0	0	317	363	0	0	0	0
3	21	5	"IME1"	"YJR094C"	14640	25420	70	429	801	1008	94	99	40	96	90	0	564	835	800	89	94	33	100	96	0	0	0	0	0	0	0	0	0	0	0	0	0	0	0	0	0	0	0	0.705	0.948	0.697	0.754	2.212	1.170	0.613	0.000	0.000	0.000	0.000	0.000	0.000	0.000	0.000	0.000	0.000	0.000	0.000	0.000	0.000	32	236	810	1453	-0.504	Error	Error	335	475	0	0	707	746	0	0	0	0
3	1	6	"GEA1"	"YJR031C"	10650	25640	70	288	621	980	107	123	145	53	37	0	459	733	944	109	125	113	81	65	0	0	0	0	0	0	0	0	0	0	0	0	0	0	0	0	0	0	0	0.517	0.824	0.613	0.634	2.852	1.010	0.728	0.000	0.000	0.000	0.000	0.000	0.000	0.000	0.000	0.000	0.000	0.000	0.000	0.000	0.000	32	236	531	1138	-0.951	Error	Error	181	350	0	0	514	624	0	0	0	0
3	2	6	"RPA12"	"YJR063W"	10850	25640	70	243	463	550	104	107	42	90	78	0	332	677	900	107	114	36	100	96	0	0	0	0	0	0	0	0	0	0	0	0	0	0	0	0	0	0	0	0.618	0.630	0.558	0.598	2.321	0.585	0.813	0.000	0.000	0.000	0.000	0.000	0.000	0.000	0.000	0.000	0.000	0.000	0.000	0.000	0.000	32	236	364	929	-0.695	Error	Error	139	225	0	0	359	570	0	0	0	0
3	3	6	"SFC1"	"YJR095W"	11050	25640	80	178	198	104	102	122	247	9	0	0	284	355	188	112	136	344	30	1	0	0	0	0	0	0	0	0	0	0	0	0	0	0	0	0	0	0	0	0.442	0.395	0.391	0.430	2.673	0.460	0.178	0.000	0.000	0.000	0.000	0.000	0.000	0.000	0.000	0.000	0.000	0.000	0.000	0.000	0.000	52	340	248	339	-1.178	Error	Error	76	172	0	0	96	243	0	0	0	0
3	4	6	""	"YKR020W"	11240	25640	70	892	1274	1084	97	102	41	100	96	0	1369	1736	1346	114	116	26	100	100	0	0	0	0	0	0	0	0	0	0	0	0	0	0	0	0	0	0	0	0.633	0.726	0.626	0.614	1.618	0.756	0.911	0.000	0.000	0.000	0.000	0.000	0.000	0.000	0.000	0.000	0.000	0.000	0.000	0.000	0.000	32	236	2050	2799	-0.659	Error	Error	795	1255	0	0	1177	1622	0	0	0	0
3	5	6	"MRS4"	"YKR052C"	11440	25640	70	491	876	884	98	103	40	100	90	0	537	765	663	116	119	28	93	93	0	0	0	0	0	0	0	0	0	0	0	0	0	0	0	0	0	0	0	0.933	1.199	1.192	1.177	2.737	1.300	0.844	0.000	0.000	0.000	0.000	0.000	0.000	0.000	0.000	0.000	0.000	0.000	0.000	0.000	0.000	32	236	814	1427	-0.099	Error	Error	393	421	0	0	778	649	0	0	0	0
3	6	6	"HBS1"	"YKR084C"	11640	25630	60	563	800	601	100	106	47	96	96	0	771	1010	618	111	116	32	100	100	0	0	0	0	0	0	0	0	0	0	0	0	0	0	0	0	0	0	0	0.702	0.779	0.740	0.730	1.686	0.847	0.825	0.000	0.000	0.000	0.000	0.000	0.000	0.000	0.000	0.000	0.000	0.000	0.000	0.000	0.000	32	176	1123	1599	-0.511	Error	Error	463	660	0	0	700	899	0	0	0	0
3	7	6	""	"YKR022C"	11850	25640	80	436	1547	2416	101	113	112	88	75	0	678	1310	1827	114	133	231	73	55	0	0	0	0	0	0	0	0	0	0	0	0	0	0	0	0	0	0	0	0.594	1.209	0.998	0.915	2.469	1.313	0.898	0.000	0.000	0.000	0.000	0.000	0.000	0.000	0.000	0.000	0.000	0.000	0.000	0.000	0.000	52	340	899	2642	-0.752	Error	Error	335	564	0	0	1446	1196	0	0	0	0
3	8	6	"DYN1"	"YKR054C"	12040	25630	60	175	178	62	94	108	86	43	6	0	187	242	139	106	117	82	46	31	0	0	0	0	0	0	0	0	0	0	0	0	0	0	0	0	0	0	0	1.000	0.618	0.863	0.938	3.325	0.314	0.315	0.000	0.000	0.000	0.000	0.000	0.000	0.000	0.000	0.000	0.000	0.000	0.000	0.000	0.000	32	176	162	220	0.000	Error	Error	81	81	0	0	84	136	0	0	0	0
3	9	6	"PRP16"	"YKR086W"	12240	25640	70	319	1011	2325	96	102	43	87	78	0	669	1276	1897	107	110	30	100	100	0	0	0	0	0	0	0	0	0	0	0	0	0	0	0	0	0	0	0	0.397	0.783	0.444	0.399	2.677	1.170	0.654	0.000	0.000	0.000	0.000	0.000	0.000	0.000	0.000	0.000	0.000	0.000	0.000	0.000	0.000	32	236	785	2084	-1.334	Error	Error	223	562	0	0	915	1169	0	0	0	0
3	10	6	"DBP7"	"YKR024C"	12440	25630	60	354	616	833	107	109	48	87	78	0	415	775	1066	106	110	29	96	93	0	0	0	0	0	0	0	0	0	0	0	0	0	0	0	0	0	0	0	0.799	0.761	0.804	0.751	2.800	0.724	0.638	0.000	0.000	0.000	0.000	0.000	0.000	0.000	0.000	0.000	0.000	0.000	0.000	0.000	0.000	32	176	556	1178	-0.323	Error	Error	247	309	0	0	509	669	0	0	0	0
3	11	6	"RNC1"	"YKR056W"	12640	25640	70	384	857	1208	105	107	45	84	81	0	890	1396	1471	105	110	39	96	93	0	0	0	0	0	0	0	0	0	0	0	0	0	0	0	0	0	0	0	0.355	0.582	0.477	0.423	3.238	0.713	0.815	0.000	0.000	0.000	0.000	0.000	0.000	0.000	0.000	0.000	0.000	0.000	0.000	0.000	0.000	32	236	1064	2043	-1.492	Error	Error	279	785	0	0	752	1291	0	0	0	0
3	12	6	""	"YKR088C"	12860	25630	70	445	718	902	97	105	44	93	87	0	456	768	933	106	111	37	96	84	0	0	0	0	0	0	0	0	0	0	0	0	0	0	0	0	0	0	0	0.994	0.938	0.823	0.928	2.048	0.932	0.593	0.000	0.000	0.000	0.000	0.000	0.000	0.000	0.000	0.000	0.000	0.000	0.000	0.000	0.000	32	236	698	1283	-0.008	Error	Error	348	350	0	0	621	662	0	0	0	0
3	13	6	"GCN3"	"YKR026C"	13060	25630	80	2798	2565	1250	104	110	43	100	100	0	3433	3211	1062	104	111	37	100	100	0	0	0	0	0	0	0	0	0	0	0	0	0	0	0	0	0	0	0	0.809	0.792	0.832	0.678	1.701	0.859	0.914	0.000	0.000	0.000	0.000	0.000	0.000	0.000	0.000	0.000	0.000	0.000	0.000	0.000	0.000	52	334	6023	5568	-0.305	Error	Error	2694	3329	0	0	2461	3107	0	0	0	0
3	14	6	"GLG1"	"YKR058W"	13230	25630	80	560	1447	1667	103	109	48	96	90	0	1040	2411	2708	104	116	76	100	96	0	0	0	0	0	0	0	0	0	0	0	0	0	0	0	0	0	0	0	0.488	0.583	0.537	0.478	2.011	0.589	0.904	0.000	0.000	0.000	0.000	0.000	0.000	0.000	0.000	0.000	0.000	0.000	0.000	0.000	0.000	52	334	1393	3651	-1.034	Error	Error	457	936	0	0	1344	2307	0	0	0	0
3	15	6	""	"YKR090W"	13440	25630	80	315	798	1035	94	101	44	96	84	0	682	1374	1946	96	102	32	100	98	0	0	0	0	0	0	0	0	0	0	0	0	0	0	0	0	0	0	0	0.377	0.551	0.484	0.462	2.418	0.495	0.760	0.000	0.000	0.000	0.000	0.000	0.000	0.000	0.000	0.000	0.000	0.000	0.000	0.000	0.000	52	340	807	1982	-1.407	Error	Error	221	586	0	0	704	1278	0	0	0	0
3	16	6	""	"YLR231C"	13650	25620	90	2903	2782	1200	89	98	42	100	100	0	4334	4259	1725	96	98	29	100	100	0	0	0	0	0	0	0	0	0	0	0	0	0	0	0	0	0	0	0	0.664	0.647	0.655	0.635	1.629	0.643	0.897	0.000	0.000	0.000	0.000	0.000	0.000	0.000	0.000	0.000	0.000	0.000	0.000	0.000	0.000	52	420	7052	6856	-0.591	Error	Error	2814	4238	0	0	2693	4163	0	0	0	0
3	17	6	"RED1"	"YLR263W"	13840	25620	80	1054	1343	1122	95	101	41	96	92	0	1321	1878	1526	96	100	31	100	98	0	0	0	0	0	0	0	0	0	0	0	0	0	0	0	0	0	0	0	0.783	0.700	0.731	0.654	2.376	0.692	0.801	0.000	0.000	0.000	0.000	0.000	0.000	0.000	0.000	0.000	0.000	0.000	0.000	0.000	0.000	52	340	2184	3030	-0.353	Error	Error	959	1225	0	0	1248	1782	0	0	0	0
3	18	6	""	"YLR294C"	14050	25620	90	884	851	362	98	103	43	98	96	0	1826	1758	830	99	107	43	100	98	0	0	0	0	0	0	0	0	0	0	0	0	0	0	0	0	0	0	0	0.455	0.454	0.420	0.467	2.103	0.405	0.752	0.000	0.000	0.000	0.000	0.000	0.000	0.000	0.000	0.000	0.000	0.000	0.000	0.000	0.000	52	414	2513	2412	-1.136	Error	Error	786	1727	0	0	753	1659	0	0	0	0
3	19	6	"EST1"	"YLR233C"	14230	25620	80	1164	2071	1927	99	105	47	88	86	0	1601	2666	2620	98	106	40	90	80	0	0	0	0	0	0	0	0	0	0	0	0	0	0	0	0	0	0	0	0.709	0.768	0.821	0.936	3.291	0.730	0.832	0.000	0.000	0.000	0.000	0.000	0.000	0.000	0.000	0.000	0.000	0.000	0.000	0.000	0.000	52	340	2568	4540	-0.497	Error	Error	1065	1503	0	0	1972	2568	0	0	0	0
3	20	6	""	"YLR265C"	14440	25620	80	1933	2022	1568	95	105	45	88	86	0	1622	1787	1272	99	103	43	90	90	0	0	0	0	0	0	0	0	0	0	0	0	0	0	0	0	0	0	0	1.207	1.142	1.083	0.932	3.101	1.211	0.760	0.000	0.000	0.000	0.000	0.000	0.000	0.000	0.000	0.000	0.000	0.000	0.000	0.000	0.000	52	340	3361	3615	0.271	Error	Error	1838	1523	0	0	1927	1688	0	0	0	0
3	21	6	""	"YLR296W"	14640	25620	70	572	625	313	99	104	42	93	90	0	1083	1023	391	92	98	36	100	100	0	0	0	0	0	0	0	0	0	0	0	0	0	0	0	0	0	0	0	0.477	0.565	0.641	0.501	1.939	0.591	0.701	0.000	0.000	0.000	0.000	0.000	0.000	0.000	0.000	0.000	0.000	0.000	0.000	0.000	0.000	32	236	1464	1457	-1.067	Error	Error	473	991	0	0	526	931	0	0	0	0
3	1	7	""	"YLR235C"	10640	25840	80	1527	1447	545	106	108	43	100	100	0	1870	1683	584	111	113	32	98	98	0	0	0	0	0	0	0	0	0	0	0	0	0	0	0	0	0	0	0	0.808	0.853	0.854	0.820	1.801	0.846	0.836	0.000	0.000	0.000	0.000	0.000	0.000	0.000	0.000	0.000	0.000	0.000	0.000	0.000	0.000	52	332	3180	2913	-0.308	Error	Error	1421	1759	0	0	1341	1572	0	0	0	0
3	2	7	"BOP2"	"YLR267W"	10830	25850	70	3732	3437	1500	100	105	39	100	100	0	4239	4410	1824	110	113	30	100	100	0	0	0	0	0	0	0	0	0	0	0	0	0	0	0	0	0	0	0	0.880	0.776	0.792	0.728	1.453	0.774	0.907	0.000	0.000	0.000	0.000	0.000	0.000	0.000	0.000	0.000	0.000	0.000	0.000	0.000	0.000	32	236	7761	7637	-0.185	Error	Error	3632	4129	0	0	3337	4300	0	0	0	0
3	3	7	"YHC1"	"YLR298C"	11050	25840	80	1031	959	373	99	105	44	96	94	0	2077	1762	717	114	117	29	98	98	0	0	0	0	0	0	0	0	0	0	0	0	0	0	0	0	0	0	0	0.475	0.522	0.528	0.532	2.634	0.741	0.304	0.000	0.000	0.000	0.000	0.000	0.000	0.000	0.000	0.000	0.000	0.000	0.000	0.000	0.000	52	340	2895	2508	-1.075	Error	Error	932	1963	0	0	860	1648	0	0	0	0
3	4	7	"THI7"	"YLR237W"	11250	25840	80	3398	3050	1227	100	104	43	100	100	0	4987	4117	1820	118	119	29	100	100	0	0	0	0	0	0	0	0	0	0	0	0	0	0	0	0	0	0	0	0.677	0.738	0.713	0.793	1.834	0.747	0.816	0.000	0.000	0.000	0.000	0.000	0.000	0.000	0.000	0.000	0.000	0.000	0.000	0.000	0.000	52	340	8167	6949	-0.562	Error	Error	3298	4869	0	0	2950	3999	0	0	0	0
3	5	7	""	"YLR269C"	11440	25840	80	1128	1029	382	105	109	61	100	98	0	1578	1507	426	117	126	123	100	98	0	0	0	0	0	0	0	0	0	0	0	0	0	0	0	0	0	0	0	0.700	0.665	0.655	0.610	1.578	0.665	0.838	0.000	0.000	0.000	0.000	0.000	0.000	0.000	0.000	0.000	0.000	0.000	0.000	0.000	0.000	52	340	2484	2314	-0.514	Error	Error	1023	1461	0	0	924	1390	0	0	0	0
3	6	7	"EXG1"	"YLR300W"	11640	25840	80	2104	1842	801	103	108	45	100	98	0	3572	3172	1033	116	120	31	100	100	0	0	0	0	0	0	0	0	0	0	0	0	0	0	0	0	0	0	0	0.579	0.569	0.584	0.509	1.744	0.588	0.884	0.000	0.000	0.000	0.000	0.000	0.000	0.000	0.000	0.000	0.000	0.000	0.000	0.000	0.000	52	340	5457	4795	-0.788	Error	Error	2001	3456	0	0	1739	3056	0	0	0	0
3	7	7	"MVP1"	"YMR004W"	11840	25840	70	742	1836	2440	97	103	44	100	100	0	669	1014	848	116	122	37	100	100	0	0	0	0	0	0	0	0	0	0	0	0	0	0	0	0	0	0	0	1.166	1.937	1.372	1.246	2.493	2.797	0.722	0.000	0.000	0.000	0.000	0.000	0.000	0.000	0.000	0.000	0.000	0.000	0.000	0.000	0.000	32	236	1198	2637	0.222	Error	Error	645	553	0	0	1739	898	0	0	0	0
3	8	7	"IMP2"	"YMR035W"	12040	25840	70	821	1535	1614	109	118	82	100	100	0	734	1213	979	114	127	96	100	93	0	0	0	0	0	0	0	0	0	0	0	0	0	0	0	0	0	0	0	1.148	1.298	1.204	1.034	1.936	1.515	0.819	0.000	0.000	0.000	0.000	0.000	0.000	0.000	0.000	0.000	0.000	0.000	0.000	0.000	0.000	32	236	1332	2525	0.200	Error	Error	712	620	0	0	1426	1099	0	0	0	0
3	9	7	"SOV1"	"YMR066W"	12240	25840	60	287	400	326	95	103	44	90	81	0	431	600	560	111	116	42	100	93	0	0	0	0	0	0	0	0	0	0	0	0	0	0	0	0	0	0	0	0.600	0.624	0.557	0.582	2.565	0.227	0.101	0.000	0.000	0.000	0.000	0.000	0.000	0.000	0.000	0.000	0.000	0.000	0.000	0.000	0.000	32	176	512	794	-0.737	Error	Error	192	320	0	0	305	489	0	0	0	0
3	10	7	"PLB2"	"YMR006C"	12450	25840	70	699	3314	6643	100	104	44	100	96	0	531	1204	1837	109	112	39	100	96	0	0	0	0	0	0	0	0	0	0	0	0	0	0	0	0	0	0	0	1.419	2.935	1.741	1.743	2.944	3.794	0.812	0.000	0.000	0.000	0.000	0.000	0.000	0.000	0.000	0.000	0.000	0.000	0.000	0.000	0.000	32	236	1021	4309	0.505	Error	Error	599	422	0	0	3214	1095	0	0	0	0
3	11	7	"MSN2"	"YMR037C"	12640	25840	70	289	454	543	93	100	45	87	75	0	445	648	548	105	108	27	100	100	0	0	0	0	0	0	0	0	0	0	0	0	0	0	0	0	0	0	0	0.576	0.665	0.702	0.565	2.193	0.830	0.689	0.000	0.000	0.000	0.000	0.000	0.000	0.000	0.000	0.000	0.000	0.000	0.000	0.000	0.000	32	236	536	904	-0.795	Error	Error	196	340	0	0	361	543	0	0	0	0
3	12	7	""	"YMR068W"	12830	25840	70	366	901	1318	97	105	43	100	93	0	711	1712	2097	107	108	28	100	100	0	0	0	0	0	0	0	0	0	0	0	0	0	0	0	0	0	0	0	0.445	0.501	0.417	0.463	2.166	0.551	0.768	0.000	0.000	0.000	0.000	0.000	0.000	0.000	0.000	0.000	0.000	0.000	0.000	0.000	0.000	32	236	873	2409	-1.167	Error	Error	269	604	0	0	804	1605	0	0	0	0
3	13	7	"PLB1"	"YMR008C"	13030	25830	80	5568	6169	3859	106	109	43	100	100	0	5691	4966	3170	106	111	37	100	98	0	0	0	0	0	0	0	0	0	0	0	0	0	0	0	0	0	0	0	0.978	1.248	1.239	1.418	2.739	1.255	0.853	0.000	0.000	0.000	0.000	0.000	0.000	0.000	0.000	0.000	0.000	0.000	0.000	0.000	0.000	52	340	11047	10923	-0.032	Error	Error	5462	5585	0	0	6063	4860	0	0	0	0
3	14	7	"SUB1"	"YMR039C"	13230	25830	80	1603	1505	675	96	101	41	100	98	0	3384	3044	1570	104	109	35	98	96	0	0	0	0	0	0	0	0	0	0	0	0	0	0	0	0	0	0	0	0.459	0.479	0.464	0.590	3.163	0.428	0.799	0.000	0.000	0.000	0.000	0.000	0.000	0.000	0.000	0.000	0.000	0.000	0.000	0.000	0.000	52	340	4787	4349	-1.122	Error	Error	1507	3280	0	0	1409	2940	0	0	0	0
3	15	7	"MOT3"	"YMR070W"	13440	25830	80	2418	2364	1883	102	104	41	92	88	0	2186	2084	1334	100	105	29	98	96	0	0	0	0	0	0	0	0	0	0	0	0	0	0	0	0	0	0	0	1.110	1.140	1.121	0.848	3.101	1.268	0.899	0.000	0.000	0.000	0.000	0.000	0.000	0.000	0.000	0.000	0.000	0.000	0.000	0.000	0.000	52	340	4402	4246	0.151	Error	Error	2316	2086	0	0	2262	1984	0	0	0	0
3	16	7	""	"YMR010W"	13630	25830	90	4346	3914	1603	99	102	42	100	100	0	4463	3874	1634	101	109	47	100	100	0	0	0	0	0	0	0	0	0	0	0	0	0	0	0	0	0	0	0	0.974	1.011	0.997	1.030	1.832	0.997	0.890	0.000	0.000	0.000	0.000	0.000	0.000	0.000	0.000	0.000	0.000	0.000	0.000	0.000	0.000	52	420	8609	7588	-0.039	Error	Error	4247	4362	0	0	3815	3773	0	0	0	0
3	17	7	""	"YMR041C"	13820	25830	80	2383	2114	854	93	101	46	100	96	0	3537	3225	1316	99	106	35	98	98	0	0	0	0	0	0	0	0	0	0	0	0	0	0	0	0	0	0	0	0.666	0.647	0.630	0.655	2.502	0.609	0.833	0.000	0.000	0.000	0.000	0.000	0.000	0.000	0.000	0.000	0.000	0.000	0.000	0.000	0.000	52	340	5728	5147	-0.586	Error	Error	2290	3438	0	0	2021	3126	0	0	0	0
3	18	7	"ABF2"	"YMR072W"	14040	25830	80	1786	1755	730	100	105	45	100	100	0	1869	1879	608	97	104	37	100	100	0	0	0	0	0	0	0	0	0	0	0	0	0	0	0	0	0	0	0	0.951	0.929	0.899	0.861	1.602	0.958	0.799	0.000	0.000	0.000	0.000	0.000	0.000	0.000	0.000	0.000	0.000	0.000	0.000	0.000	0.000	52	340	3458	3437	-0.072	Error	Error	1686	1772	0	0	1655	1782	0	0	0	0
3	19	7	""	"YNL046W"	14240	25830	80	2533	2511	977	103	105	40	100	100	0	5770	5228	1948	103	110	37	100	100	0	0	0	0	0	0	0	0	0	0	0	0	0	0	0	0	0	0	0	0.429	0.470	0.461	0.472	1.946	0.443	0.848	0.000	0.000	0.000	0.000	0.000	0.000	0.000	0.000	0.000	0.000	0.000	0.000	0.000	0.000	52	340	8097	7533	-1.222	Error	Error	2430	5667	0	0	2408	5125	0	0	0	0
3	20	7	"TPM1"	"YNL079C"	14430	25830	80	2811	2547	1051	92	99	40	100	100	0	5072	4684	1416	102	108	35	100	100	0	0	0	0	0	0	0	0	0	0	0	0	0	0	0	0	0	0	0	0.547	0.536	0.535	0.489	1.835	0.535	0.845	0.000	0.000	0.000	0.000	0.000	0.000	0.000	0.000	0.000	0.000	0.000	0.000	0.000	0.000	52	340	7689	7037	-0.870	Error	Error	2719	4970	0	0	2455	4582	0	0	0	0
3	21	7	"CYB5"	"YNL111C"	14630	25820	80	1909	1941	876	98	103	43	100	100	0	2259	2166	1121	90	97	38	98	98	0	0	0	0	0	0	0	0	0	0	0	0	0	0	0	0	0	0	0	0.835	0.888	0.836	1.016	2.811	0.843	0.776	0.000	0.000	0.000	0.000	0.000	0.000	0.000	0.000	0.000	0.000	0.000	0.000	0.000	0.000	52	340	3980	3919	-0.260	Error	Error	1811	2169	0	0	1843	2076	0	0	0	0
3	1	8	"ALG11"	"YNL048W"	10630	26050	80	4666	4492	2790	107	129	334	96	90	0	5139	4113	2496	111	117	36	100	98	0	0	0	0	0	0	0	0	0	0	0	0	0	0	0	0	0	0	0	0.907	1.096	1.118	1.123	2.232	1.111	0.918	0.000	0.000	0.000	0.000	0.000	0.000	0.000	0.000	0.000	0.000	0.000	0.000	0.000	0.000	52	320	9587	8387	-0.141	Error	Error	4559	5028	0	0	4385	4002	0	0	0	0
3	2	8	""	"YNL081C"	10850	26050	80	2410	2261	1031	102	105	42	98	96	0	1533	1459	466	111	118	55	100	100	0	0	0	0	0	0	0	0	0	0	0	0	0	0	0	0	0	0	0	1.623	1.602	1.604	1.440	1.663	1.822	0.841	0.000	0.000	0.000	0.000	0.000	0.000	0.000	0.000	0.000	0.000	0.000	0.000	0.000	0.000	52	340	3730	3507	0.699	Error	Error	2308	1422	0	0	2159	1348	0	0	0	0
3	3	8	"RPC19"	"YNL113W"	11030	26040	70	1212	1144	408	99	106	45	100	100	0	1894	1843	618	112	117	36	100	100	0	0	0	0	0	0	0	0	0	0	0	0	0	0	0	0	0	0	0	0.625	0.604	0.590	0.586	1.418	0.596	0.786	0.000	0.000	0.000	0.000	0.000	0.000	0.000	0.000	0.000	0.000	0.000	0.000	0.000	0.000	32	236	2895	2776	-0.679	Error	Error	1113	1782	0	0	1045	1731	0	0	0	0
3	4	8	""	"YNL050C"	11230	26050	80	3355	3046	1030	102	112	78	100	100	0	2055	1861	578	116	124	58	100	100	0	0	0	0	0	0	0	0	0	0	0	0	0	0	0	0	0	0	0	1.678	1.687	1.657	1.647	1.474	1.743	0.884	0.000	0.000	0.000	0.000	0.000	0.000	0.000	0.000	0.000	0.000	0.000	0.000	0.000	0.000	52	340	5192	4689	0.746	Error	Error	3253	1939	0	0	2944	1745	0	0	0	0
3	5	8	""	"YNL083W"	11450	26050	80	2829	2676	1620	97	102	40	98	98	0	3813	3627	1688	118	122	32	100	100	0	0	0	0	0	0	0	0	0	0	0	0	0	0	0	0	0	0	0	0.739	0.735	0.691	0.604	1.866	0.786	0.831	0.000	0.000	0.000	0.000	0.000	0.000	0.000	0.000	0.000	0.000	0.000	0.000	0.000	0.000	52	340	6427	6088	-0.436	Error	Error	2732	3695	0	0	2579	3509	0	0	0	0
3	6	8	""	"YNL115C"	11620	26040	70	5647	5450	2343	99	104	43	100	100	0	5407	4753	2044	118	129	56	100	100	0	0	0	0	0	0	0	0	0	0	0	0	0	0	0	0	0	0	0	1.049	1.154	1.169	1.111	1.882	1.111	0.895	0.000	0.000	0.000	0.000	0.000	0.000	0.000	0.000	0.000	0.000	0.000	0.000	0.000	0.000	32	236	10837	9986	0.069	Error	Error	5548	5289	0	0	5351	4635	0	0	0	0
3	7	8	"COX5A"	"YNL052W"	11840	26040	90	817	777	289	98	105	64	100	94	0	1278	1144	433	113	119	47	98	94	0	0	0	0	0	0	0	0	0	0	0	0	0	0	0	0	0	0	0	0.617	0.659	0.656	0.702	2.387	0.623	0.811	0.000	0.000	0.000	0.000	0.000	0.000	0.000	0.000	0.000	0.000	0.000	0.000	0.000	0.000	52	420	1884	1710	-0.696	Error	Error	719	1165	0	0	679	1031	0	0	0	0
3	8	8	"MKT1"	"YNL085W"	12030	26030	70	158	827	1494	96	103	42	65	43	0	216	1052	1786	122	128	46	81	50	0	0	0	0	0	0	0	0	0	0	0	0	0	0	0	0	0	0	0	0.660	0.786	0.711	0.741	4.433	0.851	0.687	0.000	0.000	0.000	0.000	0.000	0.000	0.000	0.000	0.000	0.000	0.000	0.000	0.000	0.000	32	236	156	1661	-0.600	Error	Error	62	94	0	0	731	930	0	0	0	0
3	9	8	"MLS1"	"YNL117W"	12230	26050	60	182	706	794	101	104	41	50	50	0	521	1543	1781	117	127	51	53	50	0	0	0	0	0	0	0	0	0	0	0	0	0	0	0	0	0	0	0	0.200	0.424	0.409	0.465	2.383	0.398	0.764	0.000	0.000	0.000	0.000	0.000	0.000	0.000	0.000	0.000	0.000	0.000	0.000	0.000	0.000	32	176	485	2031	-2.318	Error	Error	81	404	0	0	605	1426	0	0	0	0
3	10	8	""	"YOL015W"	12440	26040	80	781	889	551	100	106	49	96	94	0	869	897	445	116	121	36	98	96	0	0	0	0	0	0	0	0	0	0	0	0	0	0	0	0	0	0	0	0.904	1.010	1.059	0.929	2.580	1.084	0.773	0.000	0.000	0.000	0.000	0.000	0.000	0.000	0.000	0.000	0.000	0.000	0.000	0.000	0.000	52	340	1434	1570	-0.145	Error	Error	681	753	0	0	789	781	0	0	0	0
3	11	8	""	"YOL047C"	12630	26040	80	1295	1220	572	107	111	47	100	98	0	2484	2175	1051	117	120	37	98	98	0	0	0	0	0	0	0	0	0	0	0	0	0	0	0	0	0	0	0	0.502	0.541	0.565	0.577	2.373	0.511	0.830	0.000	0.000	0.000	0.000	0.000	0.000	0.000	0.000	0.000	0.000	0.000	0.000	0.000	0.000	52	340	3555	3171	-0.995	Error	Error	1188	2367	0	0	1113	2058	0	0	0	0
3	12	8	""	"YOL079W"	12840	26060	60	198	216	75	110	117	48	78	40	0	307	322	96	109	124	51	100	93	0	0	0	0	0	0	0	0	0	0	0	0	0	0	0	0	0	0	0	0.444	0.498	0.473	0.425	2.234	0.419	0.228	0.000	0.000	0.000	0.000	0.000	0.000	0.000	0.000	0.000	0.000	0.000	0.000	0.000	0.000	32	176	286	319	-1.170	Error	Error	88	198	0	0	106	213	0	0	0	0
3	13	8	""	"YOL017W"	13030	26040	80	6738	7027	4332	102	107	44	100	100	0	5482	4658	2463	108	113	32	100	100	0	0	0	0	0	0	0	0	0	0	0	0	0	0	0	0	0	0	0	1.235	1.522	1.562	1.367	1.913	1.631	0.903	0.000	0.000	0.000	0.000	0.000	0.000	0.000	0.000	0.000	0.000	0.000	0.000	0.000	0.000	52	340	12010	11475	0.304	Error	Error	6636	5374	0	0	6925	4550	0	0	0	0
3	14	8	"GSH2"	"YOL049W"	13230	26040	70	233	276	162	101	105	40	93	68	0	397	411	190	99	104	32	96	93	0	0	0	0	0	0	0	0	0	0	0	0	0	0	0	0	0	0	0	0.443	0.561	0.554	0.511	2.061	0.591	0.514	0.000	0.000	0.000	0.000	0.000	0.000	0.000	0.000	0.000	0.000	0.000	0.000	0.000	0.000	32	236	430	487	-1.175	Error	Error	132	298	0	0	175	312	0	0	0	0
3	15	8	"IRA2"	"YOL081W"	13440	26040	70	162	162	62	103	108	41	68	28	0	177	260	181	107	111	33	65	53	0	0	0	0	0	0	0	0	0	0	0	0	0	0	0	0	0	0	0	0.843	0.386	0.592	0.669	4.958	0.195	0.159	0.000	0.000	0.000	0.000	0.000	0.000	0.000	0.000	0.000	0.000	0.000	0.000	0.000	0.000	32	236	129	212	-0.247	Error	Error	59	70	0	0	59	153	0	0	0	0
3	16	8	""	"YOL019W"	13630	26030	70	13794	12479	4582	103	106	43	100	100	0	9098	7869	2968	103	110	35	100	100	0	0	0	0	0	0	0	0	0	0	0	0	0	0	0	0	0	0	0	1.522	1.594	1.567	1.543	1.602	1.568	0.933	0.000	0.000	0.000	0.000	0.000	0.000	0.000	0.000	0.000	0.000	0.000	0.000	0.000	0.000	32	236	22686	20142	0.606	Error	Error	13691	8995	0	0	12376	7766	0	0	0	0
3	17	8	"GAL11"	"YOL051W"	13840	26040	70	3825	3788	2423	106	114	50	100	96	0	5588	5655	3201	103	109	42	100	100	0	0	0	0	0	0	0	0	0	0	0	0	0	0	0	0	0	0	0	0.678	0.663	0.641	0.549	1.958	0.690	0.900	0.000	0.000	0.000	0.000	0.000	0.000	0.000	0.000	0.000	0.000	0.000	0.000	0.000	0.000	32	236	9204	9234	-0.561	Error	Error	3719	5485	0	0	3682	5552	0	0	0	0
3	18	8	""	"YOL083W"	14040	26040	90	2943	2510	1138	105	112	65	100	100	0	5234	4839	1472	106	112	38	100	100	0	0	0	0	0	0	0	0	0	0	0	0	0	0	0	0	0	0	0	0.553	0.508	0.506	0.449	1.563	0.549	0.890	0.000	0.000	0.000	0.000	0.000	0.000	0.000	0.000	0.000	0.000	0.000	0.000	0.000	0.000	52	420	7966	7138	-0.854	Error	Error	2838	5128	0	0	2405	4733	0	0	0	0
3	19	8	"DIS3"	"YOL021C"	14240	26020	70	7744	6165	3707	103	109	58	100	96	0	11071	9696	5663	117	129	83	96	96	0	0	0	0	0	0	0	0	0	0	0	0	0	0	0	0	0	0	0	0.698	0.633	0.678	0.705	2.265	0.624	0.876	0.000	0.000	0.000	0.000	0.000	0.000	0.000	0.000	0.000	0.000	0.000	0.000	0.000	0.000	32	236	18595	15641	-0.520	Error	Error	7641	10954	0	0	6062	9579	0	0	0	0
3	20	8	""	"YOL053C-A"	14430	26030	80	825	821	298	95	100	42	100	100	0	1594	1466	525	106	113	42	96	96	0	0	0	0	0	0	0	0	0	0	0	0	0	0	0	0	0	0	0	0.491	0.534	0.513	0.551	1.983	0.514	0.830	0.000	0.000	0.000	0.000	0.000	0.000	0.000	0.000	0.000	0.000	0.000	0.000	0.000	0.000	52	340	2218	2086	-1.027	Error	Error	730	1488	0	0	726	1360	0	0	0	0
3	21	8	""	"YOL085C"	14630	26030	70	654	674	218	98	101	44	100	96	0	864	881	218	93	98	35	100	100	0	0	0	0	0	0	0	0	0	0	0	0	0	0	0	0	0	0	0	0.721	0.731	0.747	0.686	1.604	0.709	0.712	0.000	0.000	0.000	0.000	0.000	0.000	0.000	0.000	0.000	0.000	0.000	0.000	0.000	0.000	32	236	1327	1364	-0.472	Error	Error	556	771	0	0	576	788	0	0	0	0
3	1	9	"KIN4"	"YOR233W"	10620	26250	70	3456	4678	3195	107	109	43	100	100	0	3070	4430	2895	118	137	153	100	100	0	0	0	0	0	0	0	0	0	0	0	0	0	0	0	0	0	0	0	1.134	1.060	1.010	1.051	2.123	0.966	0.605	0.000	0.000	0.000	0.000	0.000	0.000	0.000	0.000	0.000	0.000	0.000	0.000	0.000	0.000	32	206	6301	8883	0.182	Error	Error	3349	2952	0	0	4571	4312	0	0	0	0
3	2	9	"RBL2"	"YOR265W"	10840	26250	80	1370	1340	858	98	104	46	94	90	0	1183	1311	814	113	117	47	94	90	0	0	0	0	0	0	0	0	0	0	0	0	0	0	0	0	0	0	0	1.189	1.037	0.973	1.025	2.158	1.045	0.755	0.000	0.000	0.000	0.000	0.000	0.000	0.000	0.000	0.000	0.000	0.000	0.000	0.000	0.000	52	340	2342	2440	0.249	Error	Error	1272	1070	0	0	1242	1198	0	0	0	0
3	3	9	"TIM18"	"YOR297C"	11040	26260	90	1533	1378	615	102	129	249	88	82	0	1386	1307	518	117	193	981	65	5	0	0	0	0	0	0	0	0	0	0	0	0	0	0	0	0	0	0	0	1.128	1.072	1.023	0.974	1.929	0.330	0.312	0.000	0.000	0.000	0.000	0.000	0.000	0.000	0.000	0.000	0.000	0.000	0.000	0.000	0.000	52	420	2700	2466	0.173	Error	Error	1431	1269	0	0	1276	1190	0	0	0	0
3	4	9	"SNR17A"	"YOR235W"	11250	26240	100	274	316	222	106	111	57	62	56	0	426	452	329	117	124	56	63	61	0	0	0	0	0	0	0	0	0	0	0	0	0	0	0	0	0	0	0	0.544	0.627	0.675	0.706	2.879	0.650	0.646	0.000	0.000	0.000	0.000	0.000	0.000	0.000	0.000	0.000	0.000	0.000	0.000	0.000	0.000	80	533	477	545	-0.879	Error	Error	168	309	0	0	210	335	0	0	0	0
3	5	9	""	"YOR267C"	11440	26250	70	7098	6366	3446	103	111	60	96	96	0	5821	6003	3852	122	141	118	90	90	0	0	0	0	0	0	0	0	0	0	0	0	0	0	0	0	0	0	0	1.227	1.065	1.086	1.215	1.995	0.978	0.874	0.000	0.000	0.000	0.000	0.000	0.000	0.000	0.000	0.000	0.000	0.000	0.000	0.000	0.000	32	236	12694	12144	0.296	Error	Error	6995	5699	0	0	6263	5881	0	0	0	0
3	6	9	"BUD7"	"YOR299W"	11640	26250	80	2670	2424	1176	106	108	41	100	100	0	4119	3849	2147	119	129	55	100	98	0	0	0	0	0	0	0	0	0	0	0	0	0	0	0	0	0	0	0	0.641	0.621	0.584	0.714	2.484	0.541	0.765	0.000	0.000	0.000	0.000	0.000	0.000	0.000	0.000	0.000	0.000	0.000	0.000	0.000	0.000	52	326	6564	6048	-0.642	Error	Error	2564	4000	0	0	2318	3730	0	0	0	0
3	7	9	"HES1"	"YOR237W"	11820	26250	80	2014	2058	1052	99	106	66	100	98	0	2212	2192	1191	116	124	59	98	94	0	0	0	0	0	0	0	0	0	0	0	0	0	0	0	0	0	0	0	0.914	0.944	0.876	1.023	2.587	0.899	0.756	0.000	0.000	0.000	0.000	0.000	0.000	0.000	0.000	0.000	0.000	0.000	0.000	0.000	0.000	52	340	4011	4035	-0.130	Error	Error	1915	2096	0	0	1959	2076	0	0	0	0
3	8	9	"PAC1"	"YOR269W"	12030	26250	70	5073	4783	2042	106	116	142	96	93	0	4426	4130	1365	112	117	34	100	100	0	0	0	0	0	0	0	0	0	0	0	0	0	0	0	0	0	0	0	1.151	1.164	1.197	0.995	1.945	1.288	0.852	0.000	0.000	0.000	0.000	0.000	0.000	0.000	0.000	0.000	0.000	0.000	0.000	0.000	0.000	32	236	9281	8695	0.203	Error	Error	4967	4314	0	0	4677	4018	0	0	0	0
3	9	9	"RAX1"	"YOR301W"	12240	26250	80	2003	1807	865	100	108	54	96	96	0	3953	3460	1348	110	121	59	100	98	0	0	0	0	0	0	0	0	0	0	0	0	0	0	0	0	0	0	0	0.495	0.510	0.537	0.452	1.686	0.515	0.851	0.000	0.000	0.000	0.000	0.000	0.000	0.000	0.000	0.000	0.000	0.000	0.000	0.000	0.000	52	340	5746	5057	-1.014	Error	Error	1903	3843	0	0	1707	3350	0	0	0	0
3	10	9	""	"YOR239W"	12420	26240	70	1861	1746	622	105	109	47	100	100	0	2800	2765	960	114	122	58	100	100	0	0	0	0	0	0	0	0	0	0	0	0	0	0	0	0	0	0	0	0.654	0.619	0.602	0.603	1.894	0.587	0.775	0.000	0.000	0.000	0.000	0.000	0.000	0.000	0.000	0.000	0.000	0.000	0.000	0.000	0.000	32	236	4442	4292	-0.613	Error	Error	1756	2686	0	0	1641	2651	0	0	0	0
3	11	9	""	"YOR271C"	12630	26250	70	1366	1315	499	104	111	83	100	93	0	3695	3457	1103	114	119	35	100	100	0	0	0	0	0	0	0	0	0	0	0	0	0	0	0	0	0	0	0	0.352	0.362	0.365	0.347	1.515	0.358	0.794	0.000	0.000	0.000	0.000	0.000	0.000	0.000	0.000	0.000	0.000	0.000	0.000	0.000	0.000	32	236	4843	4554	-1.505	Error	Error	1262	3581	0	0	1211	3343	0	0	0	0
3	12	9	"CPA1"	"YOR303W"	12820	26240	70	2087	1957	737	103	110	50	100	100	0	3915	3884	1138	106	114	55	100	100	0	0	0	0	0	0	0	0	0	0	0	0	0	0	0	0	0	0	0	0.521	0.491	0.483	0.447	1.657	0.458	0.817	0.000	0.000	0.000	0.000	0.000	0.000	0.000	0.000	0.000	0.000	0.000	0.000	0.000	0.000	32	236	5793	5632	-0.941	Error	Error	1984	3809	0	0	1854	3778	0	0	0	0
3	13	9	""	"YPL222W"	13030	26240	80	642	923	907	97	104	42	98	98	0	1737	2368	2225	108	114	40	100	98	0	0	0	0	0	0	0	0	0	0	0	0	0	0	0	0	0	0	0	0.335	0.365	0.329	0.357	2.413	0.316	0.607	0.000	0.000	0.000	0.000	0.000	0.000	0.000	0.000	0.000	0.000	0.000	0.000	0.000	0.000	52	326	2174	3086	-1.580	Error	Error	545	1629	0	0	826	2260	0	0	0	0
3	14	9	"HFI1"	"YPL254W"	13240	26250	50	2165	2886	1670	109	237	613	100	83	0	2842	2580	1624	118	237	580	83	75	0	0	0	0	0	0	0	0	0	0	0	0	0	0	0	0	0	0	0	0.755	1.128	1.123	1.554	3.466	1.010	0.615	0.000	0.000	0.000	0.000	0.000	0.000	0.000	0.000	0.000	0.000	0.000	0.000	0.000	0.000	12	104	4780	5239	-0.406	Error	Error	2056	2724	0	0	2777	2462	0	0	0	0
3	15	9	""	"YPR003C"	13430	26240	80	242	1410	2277	101	109	80	57	46	0	178	902	1412	105	112	51	57	44	0	0	0	0	0	0	0	0	0	0	0	0	0	0	0	0	0	0	0	1.932	1.642	1.395	1.772	5.098	1.946	0.739	0.000	0.000	0.000	0.000	0.000	0.000	0.000	0.000	0.000	0.000	0.000	0.000	0.000	0.000	52	340	214	2106	0.950	Error	Error	141	73	0	0	1309	797	0	0	0	0
3	16	9	"MMT2"	"YPL224C"	13630	26240	80	7980	6545	3898	98	102	39	100	100	0	5132	4393	2383	102	110	44	100	100	0	0	0	0	0	0	0	0	0	0	0	0	0	0	0	0	0	0	0	1.567	1.502	1.510	1.438	2.299	1.583	0.893	0.000	0.000	0.000	0.000	0.000	0.000	0.000	0.000	0.000	0.000	0.000	0.000	0.000	0.000	52	340	12912	10738	0.648	Error	Error	7882	5030	0	0	6447	4291	0	0	0	0
3	17	9	"CLN2"	"YPL256C"	13830	26230	70	4701	4922	2669	102	109	55	100	100	0	3623	4004	2456	104	111	41	100	100	0	0	0	0	0	0	0	0	0	0	0	0	0	0	0	0	0	0	0	1.307	1.236	1.237	1.304	2.295	1.278	0.745	0.000	0.000	0.000	0.000	0.000	0.000	0.000	0.000	0.000	0.000	0.000	0.000	0.000	0.000	32	236	8118	8720	0.386	Error	Error	4599	3519	0	0	4820	3900	0	0	0	0
3	18	9	"HAL1"	"YPR005C"	14020	26230	60	2583	3210	3133	94	96	38	81	78	0	1949	3022	2710	120	125	36	84	81	0	0	0	0	0	0	0	0	0	0	0	0	0	0	0	0	0	0	0	1.361	1.074	1.142	1.091	3.582	1.135	0.825	0.000	0.000	0.000	0.000	0.000	0.000	0.000	0.000	0.000	0.000	0.000	0.000	0.000	0.000	32	176	4318	6018	0.445	Error	Error	2489	1829	0	0	3116	2902	0	0	0	0
3	19	9	""	"YPL226W"	14250	26230	70	2679	2829	1792	101	104	44	100	100	0	2494	3192	2067	100	106	46	100	100	0	0	0	0	0	0	0	0	0	0	0	0	0	0	0	0	0	0	0	1.077	0.882	0.863	0.786	2.499	0.870	0.677	0.000	0.000	0.000	0.000	0.000	0.000	0.000	0.000	0.000	0.000	0.000	0.000	0.000	0.000	32	236	4972	5820	0.107	Error	Error	2578	2394	0	0	2728	3092	0	0	0	0
3	20	9	"THI21"	"YPL258C"	14420	26230	70	5373	4817	2004	106	112	47	100	100	0	6506	6034	2981	99	145	253	96	93	0	0	0	0	0	0	0	0	0	0	0	0	0	0	0	0	0	0	0	0.822	0.794	0.833	0.896	2.139	0.732	0.868	0.000	0.000	0.000	0.000	0.000	0.000	0.000	0.000	0.000	0.000	0.000	0.000	0.000	0.000	32	236	11674	10646	-0.283	Error	Error	5267	6407	0	0	4711	5935	0	0	0	0
3	21	9	"SPO69"	"YPR007C"	14630	26230	70	13943	12816	4080	98	106	47	100	100	0	8539	7518	2702	95	109	75	100	100	0	0	0	0	0	0	0	0	0	0	0	0	0	0	0	0	0	0	0	1.640	1.713	1.659	1.780	1.505	1.677	0.912	0.000	0.000	0.000	0.000	0.000	0.000	0.000	0.000	0.000	0.000	0.000	0.000	0.000	0.000	32	236	22289	20141	0.713	Error	Error	13845	8444	0	0	12718	7423	0	0	0	0
3	1	10	"CET1"	"YPL228W"	10630	26460	70	5636	6055	2563	99	103	41	100	100	0	4854	4908	1837	110	116	33	100	100	0	0	0	0	0	0	0	0	0	0	0	0	0	0	0	0	0	0	0	1.167	1.241	1.260	1.150	1.709	1.325	0.858	0.000	0.000	0.000	0.000	0.000	0.000	0.000	0.000	0.000	0.000	0.000	0.000	0.000	0.000	32	220	10281	10754	0.223	Error	Error	5537	4744	0	0	5956	4798	0	0	0	0
3	2	10	""	"YPL260W"	10840	26450	70	5476	5223	2485	101	106	45	100	100	0	4474	3998	1804	114	126	71	96	96	0	0	0	0	0	0	0	0	0	0	0	0	0	0	0	0	0	0	0	1.233	1.319	1.291	1.249	1.650	1.325	0.852	0.000	0.000	0.000	0.000	0.000	0.000	0.000	0.000	0.000	0.000	0.000	0.000	0.000	0.000	32	236	9735	9006	0.302	Error	Error	5375	4360	0	0	5122	3884	0	0	0	0
3	3	10	""	"YPR009W"	11030	26450	90	1876	1752	616	103	139	252	100	92	0	1171	1089	411	115	173	715	73	9	0	0	0	0	0	0	0	0	0	0	0	0	0	0	0	0	0	0	0	1.679	1.693	1.654	1.853	1.979	1.675	0.862	0.000	0.000	0.000	0.000	0.000	0.000	0.000	0.000	0.000	0.000	0.000	0.000	0.000	0.000	52	414	2829	2623	0.748	Error	Error	1773	1056	0	0	1649	974	0	0	0	0
3	4	10	"LTE1"	"YAL024C"	11220	26440	100	1040	1044	704	103	128	159	82	77	0	678	724	433	119	136	125	81	76	0	0	0	0	0	0	0	0	0	0	0	0	0	0	0	0	0	0	0	1.676	1.555	1.658	1.560	1.692	1.749	0.802	0.000	0.000	0.000	0.000	0.000	0.000	0.000	0.000	0.000	0.000	0.000	0.000	0.000	0.000	80	522	1496	1546	0.745	Error	Error	937	559	0	0	941	605	0	0	0	0
3	5	10	"PEP1"	"YBL017C"	11440	26440	150	110	121	56	101	108	46	26	12	0	126	151	93	115	123	75	11	8	0	0	0	0	0	0	0	0	0	0	0	0	0	0	0	0	0	0	0	0.818	0.556	1.205	1.162	4.701	0.277	0.082	0.000	0.000	0.000	0.000	0.000	0.000	0.000	0.000	0.000	0.000	0.000	0.000	0.000	0.000	156	907	20	56	-0.290	Error	Error	9	11	0	0	20	36	0	0	-50	0
3	6	10	"ENA2"	"YDR039C"	11640	26440	150	113	216	1120	103	109	62	15	5	0	116	246	1153	115	126	95	11	10	0	0	0	0	0	0	0	0	0	0	0	0	0	0	0	0	0	0	0	10.000	0.863	1.176	1.262	4.429	0.697	0.011	0.000	0.000	0.000	0.000	0.000	0.000	0.000	0.000	0.000	0.000	0.000	0.000	0.000	0.000	156	882	11	244	3.322	Error	Error	10	1	0	0	113	131	0	0	-50	0
3	7	10	""	"YFL019C"	11840	26440	60	132	143	78	104	106	40	43	25	0	159	252	200	118	123	36	53	37	0	0	0	0	0	0	0	0	0	0	0	0	0	0	0	0	0	0	0	0.683	0.291	0.947	0.977	4.701	0.201	0.239	0.000	0.000	0.000	0.000	0.000	0.000	0.000	0.000	0.000	0.000	0.000	0.000	0.000	0.000	32	176	69	173	-0.550	Error	Error	28	41	0	0	39	134	0	0	0	0
3	8	10	""	"YGL066W"	12050	26440	70	138	149	73	97	102	42	46	28	0	122	236	239	112	117	37	46	28	0	0	0	0	0	0	0	0	0	0	0	0	0	0	0	0	0	0	0	4.100	0.419	0.796	0.779	4.570	0.243	0.237	0.000	0.000	0.000	0.000	0.000	0.000	0.000	0.000	0.000	0.000	0.000	0.000	0.000	0.000	32	236	51	176	2.036	Error	Error	41	10	0	0	52	124	0	0	0	0
3	9	10	"MNT2"	"YGL257C"	12250	26420	50	200	212	72	105	125	92	50	16	0	195	366	315	108	153	174	41	41	0	0	0	0	0	0	0	0	0	0	0	0	0	0	0	0	0	0	0	1.092	0.415	0.382	0.813	5.916	0.236	0.297	0.000	0.000	0.000	0.000	0.000	0.000	0.000	0.000	0.000	0.000	0.000	0.000	0.000	0.000	12	104	182	365	0.127	Error	Error	95	87	0	0	107	258	0	0	0	0
3	10	10	""	"YHR032W"	12440	26430	50	184	207	115	99	109	68	58	33	0	328	355	228	111	136	107	58	50	0	0	0	0	0	0	0	0	0	0	0	0	0	0	0	0	0	0	0	0.392	0.443	0.291	0.423	3.240	0.314	0.350	0.000	0.000	0.000	0.000	0.000	0.000	0.000	0.000	0.000	0.000	0.000	0.000	0.000	0.000	12	104	302	352	-1.352	Error	Error	85	217	0	0	108	244	0	0	0	0
3	11	10	""	"YHR036W"	12650	26440	70	119	169	116	103	108	49	46	25	0	139	271	235	106	113	41	46	40	0	0	0	0	0	0	0	0	0	0	0	0	0	0	0	0	0	0	0	0.485	0.400	0.541	0.689	3.109	0.326	0.403	0.000	0.000	0.000	0.000	0.000	0.000	0.000	0.000	0.000	0.000	0.000	0.000	0.000	0.000	32	236	49	231	-1.044	Error	Error	16	33	0	0	66	165	0	0	0	0
3	12	10	""	"YHR045W"	12860	26440	70	122	150	87	92	100	45	40	34	0	126	237	217	97	104	34	40	34	0	0	0	0	0	0	0	0	0	0	0	0	0	0	0	0	0	0	0	1.034	0.414	0.812	0.863	5.593	0.322	0.283	0.000	0.000	0.000	0.000	0.000	0.000	0.000	0.000	0.000	0.000	0.000	0.000	0.000	0.000	32	231	59	198	0.049	Error	Error	30	29	0	0	58	140	0	0	0	0
3	13	10	"STT4"	"YLR305C"	13040	26430	150	101	115	65	98	103	43	21	7	0	111	137	100	101	107	34	21	13	0	0	0	0	0	0	0	0	0	0	0	0	0	0	0	0	0	0	0	0.300	0.472	0.971	0.983	3.948	0.636	0.090	0.000	0.000	0.000	0.000	0.000	0.000	0.000	0.000	0.000	0.000	0.000	0.000	0.000	0.000	156	899	13	53	-1.737	Error	Error	3	10	0	0	17	36	0	0	-50	0
3	14	10	""	"YLR422W"	13240	26430	150	105	119	62	98	114	200	1	0	0	104	148	152	103	119	193	8	5	0	0	0	0	0	0	0	0	0	0	0	0	0	0	0	0	0	0	0	7.000	0.467	1.169	1.173	4.050	0.303	0.135	0.000	0.000	0.000	0.000	0.000	0.000	0.000	0.000	0.000	0.000	0.000	0.000	0.000	0.000	156	949	8	66	2.807	Error	Error	7	1	0	0	21	45	0	0	-50	0
3	15	10	""	"YML072C"	13460	26430	70	132	158	105	99	105	45	43	15	0	135	209	186	100	109	38	46	37	0	0	0	0	0	0	0	0	0	0	0	0	0	0	0	0	0	0	0	0.943	0.541	0.642	0.551	3.644	0.360	0.295	0.000	0.000	0.000	0.000	0.000	0.000	0.000	0.000	0.000	0.000	0.000	0.000	0.000	0.000	32	236	68	168	-0.085	Error	Error	33	35	0	0	59	109	0	0	0	0
3	16	10	""	"SNR54"	13630	26440	60	249	307	169	97	107	45	87	71	0	361	348	138	102	107	35	100	93	0	0	0	0	0	0	0	0	0	0	0	0	0	0	0	0	0	0	0	0.587	0.854	0.874	0.758	2.147	0.910	0.507	0.000	0.000	0.000	0.000	0.000	0.000	0.000	0.000	0.000	0.000	0.000	0.000	0.000	0.000	32	176	411	456	-0.769	Error	Error	152	259	0	0	210	246	0	0	0	0
3	17	10	""	"YMR046W-A"	13850	26440	80	422	1488	2226	94	105	43	98	82	0	671	1950	2771	105	110	35	100	100	0	0	0	0	0	0	0	0	0	0	0	0	0	0	0	0	0	0	0	0.580	0.756	0.604	0.553	2.564	0.767	0.780	0.000	0.000	0.000	0.000	0.000	0.000	0.000	0.000	0.000	0.000	0.000	0.000	0.000	0.000	52	340	894	3239	-0.787	Error	Error	328	566	0	0	1394	1845	0	0	0	0
3	18	10	""	"YMRWdelta16"	14040	26430	70	388	512	348	101	107	45	100	84	0	802	918	538	103	109	37	100	100	0	0	0	0	0	0	0	0	0	0	0	0	0	0	0	0	0	0	0	0.411	0.504	0.438	0.446	2.149	0.496	0.673	0.000	0.000	0.000	0.000	0.000	0.000	0.000	0.000	0.000	0.000	0.000	0.000	0.000	0.000	32	236	986	1226	-1.284	Error	Error	287	699	0	0	411	815	0	0	0	0
3	19	10	""	"YNRCdelta9"	14230	26430	70	584	1388	1372	97	100	38	96	96	0	781	1077	848	97	103	33	100	100	0	0	0	0	0	0	0	0	0	0	0	0	0	0	0	0	0	0	0	0.712	1.317	1.188	1.033	2.297	1.511	0.805	0.000	0.000	0.000	0.000	0.000	0.000	0.000	0.000	0.000	0.000	0.000	0.000	0.000	0.000	32	236	1171	2271	-0.490	Error	Error	487	684	0	0	1291	980	0	0	0	0
3	20	10	""	"SNR50"	14450	26430	70	329	422	268	98	101	40	93	87	0	634	741	489	96	101	35	96	96	0	0	0	0	0	0	0	0	0	0	0	0	0	0	0	0	0	0	0	0.429	0.502	0.559	0.514	1.866	0.490	0.767	0.000	0.000	0.000	0.000	0.000	0.000	0.000	0.000	0.000	0.000	0.000	0.000	0.000	0.000	32	236	769	969	-1.220	Error	Error	231	538	0	0	324	645	0	0	0	0
3	21	10	""	"tR(ACG)O"	14650	26430	70	512	525	203	99	105	43	100	100	0	744	730	192	92	99	34	100	100	0	0	0	0	0	0	0	0	0	0	0	0	0	0	0	0	0	0	0	0.633	0.668	0.671	0.612	1.619	0.676	0.730	0.000	0.000	0.000	0.000	0.000	0.000	0.000	0.000	0.000	0.000	0.000	0.000	0.000	0.000	32	236	1065	1064	-0.659	Error	Error	413	652	0	0	426	638	0	0	0	0
3	1	11	""	"YPLCdelta1"	10630	26650	70	602	637	379	104	108	45	90	90	0	1057	990	531	120	123	37	100	100	0	0	0	0	0	0	0	0	0	0	0	0	0	0	0	0	0	0	0	0.531	0.613	0.610	0.545	2.184	0.609	0.761	0.000	0.000	0.000	0.000	0.000	0.000	0.000	0.000	0.000	0.000	0.000	0.000	0.000	0.000	32	220	1435	1403	-0.912	Error	Error	498	937	0	0	533	870	0	0	0	0
3	2	11	""	"YPL183W-A"	10840	26650	90	435	436	164	97	104	45	98	94	0	776	779	194	114	117	30	100	100	0	0	0	0	0	0	0	0	0	0	0	0	0	0	0	0	0	0	0	0.511	0.510	0.497	0.456	1.748	0.495	0.694	0.000	0.000	0.000	0.000	0.000	0.000	0.000	0.000	0.000	0.000	0.000	0.000	0.000	0.000	52	420	1000	1004	-0.970	Error	Error	338	662	0	0	339	665	0	0	0	0
3	3	11	""	"IntYPL143W"	11030	26650	70	884	1464	1330	102	106	44	90	87	0	1037	1593	1340	118	121	29	100	100	0	0	0	0	0	0	0	0	0	0	0	0	0	0	0	0	0	0	0	0.851	0.923	0.895	0.759	2.224	0.960	0.902	0.000	0.000	0.000	0.000	0.000	0.000	0.000	0.000	0.000	0.000	0.000	0.000	0.000	0.000	32	236	1701	2837	-0.233	Error	Error	782	919	0	0	1362	1475	0	0	0	0
3	4	11	""	"tC(GCA)P2"	11230	26650	70	457	504	292	97	103	43	96	90	0	579	660	367	120	123	33	100	96	0	0	0	0	0	0	0	0	0	0	0	0	0	0	0	0	0	0	0	0.784	0.754	0.804	0.745	1.826	0.750	0.771	0.000	0.000	0.000	0.000	0.000	0.000	0.000	0.000	0.000	0.000	0.000	0.000	0.000	0.000	32	236	819	947	-0.350	Error	Error	360	459	0	0	407	540	0	0	0	0
3	5	11	""	"tN(GUU)P"	11440	26660	80	1029	2043	2549	102	106	45	100	96	0	1775	3584	4127	115	118	29	100	100	0	0	0	0	0	0	0	0	0	0	0	0	0	0	0	0	0	0	0	0.558	0.560	0.526	0.458	1.847	0.579	0.875	0.000	0.000	0.000	0.000	0.000	0.000	0.000	0.000	0.000	0.000	0.000	0.000	0.000	0.000	52	340	2587	5410	-0.841	Error	Error	927	1660	0	0	1941	3469	0	0	0	0
3	6	11	""	"tI(AAU)P2"	11630	26650	80	641	944	747	107	110	47	98	94	0	1318	1683	1105	115	120	39	98	98	0	0	0	0	0	0	0	0	0	0	0	0	0	0	0	0	0	0	0	0.444	0.534	0.508	0.459	1.970	0.569	0.832	0.000	0.000	0.000	0.000	0.000	0.000	0.000	0.000	0.000	0.000	0.000	0.000	0.000	0.000	52	340	1737	2405	-1.172	Error	Error	534	1203	0	0	837	1568	0	0	0	0
3	7	11	""	"itL(UAA)B2"	11840	26650	70	484	549	254	96	101	40	96	96	0	728	700	191	116	120	32	100	100	0	0	0	0	0	0	0	0	0	0	0	0	0	0	0	0	0	0	0	0.634	0.776	0.793	0.708	1.591	0.844	0.774	0.000	0.000	0.000	0.000	0.000	0.000	0.000	0.000	0.000	0.000	0.000	0.000	0.000	0.000	32	236	1000	1037	-0.657	Error	Error	388	612	0	0	453	584	0	0	0	0
3	8	11	""	"iYBR057C"	12050	26650	100	1433	1617	1187	101	107	47	97	93	0	1358	1696	1427	111	119	99	90	87	0	0	0	0	0	0	0	0	0	0	0	0	0	0	0	0	0	0	0	1.068	0.956	0.987	0.993	2.398	0.884	0.825	0.000	0.000	0.000	0.000	0.000	0.000	0.000	0.000	0.000	0.000	0.000	0.000	0.000	0.000	80	556	2579	3101	0.095	Error	Error	1332	1247	0	0	1516	1585	0	0	0	0
3	9	11	""	"iYBR060C-1"	12240	26650	70	149	186	110	101	104	42	62	31	0	172	305	269	103	109	33	75	53	0	0	0	0	0	0	0	0	0	0	0	0	0	0	0	0	0	0	0	0.696	0.421	0.509	0.713	3.501	0.346	0.447	0.000	0.000	0.000	0.000	0.000	0.000	0.000	0.000	0.000	0.000	0.000	0.000	0.000	0.000	32	236	117	287	-0.524	Error	Error	48	69	0	0	85	202	0	0	0	0
3	10	11	""	"iYBR077C"	12440	26660	80	309	560	641	99	106	53	88	71	0	489	832	888	104	112	35	98	96	0	0	0	0	0	0	0	0	0	0	0	0	0	0	0	0	0	0	0	0.545	0.633	0.482	0.510	2.350	0.657	0.746	0.000	0.000	0.000	0.000	0.000	0.000	0.000	0.000	0.000	0.000	0.000	0.000	0.000	0.000	52	340	595	1189	-0.874	Error	Error	210	385	0	0	461	728	0	0	0	0
3	11	11	""	"iYBR081C"	12630	26650	70	295	461	377	101	104	44	96	81	0	469	809	727	101	107	30	100	100	0	0	0	0	0	0	0	0	0	0	0	0	0	0	0	0	0	0	0	0.527	0.508	0.468	0.485	2.077	0.471	0.722	0.000	0.000	0.000	0.000	0.000	0.000	0.000	0.000	0.000	0.000	0.000	0.000	0.000	0.000	32	236	562	1068	-0.924	Error	Error	194	368	0	0	360	708	0	0	0	0
3	12	11	""	"iYBR083W"	12830	26650	70	757	1194	1120	95	103	42	96	93	0	1197	2170	1907	100	105	33	100	100	0	0	0	0	0	0	0	0	0	0	0	0	0	0	0	0	0	0	0	0.603	0.531	0.435	0.405	2.499	0.546	0.900	0.000	0.000	0.000	0.000	0.000	0.000	0.000	0.000	0.000	0.000	0.000	0.000	0.000	0.000	32	236	1759	3169	-0.729	Error	Error	662	1097	0	0	1099	2070	0	0	0	0
3	13	11	""	"iYBR097W"	13030	26640	70	571	569	283	98	107	48	90	84	0	609	684	271	107	110	36	100	100	0	0	0	0	0	0	0	0	0	0	0	0	0	0	0	0	0	0	0	0.942	0.816	0.836	0.660	2.169	0.844	0.816	0.000	0.000	0.000	0.000	0.000	0.000	0.000	0.000	0.000	0.000	0.000	0.000	0.000	0.000	32	236	975	1048	-0.086	Error	Error	473	502	0	0	471	577	0	0	0	0
3	14	11	""	"iYBR103W"	13230	26640	80	593	918	842	98	102	40	94	88	0	810	1144	908	104	111	34	100	98	0	0	0	0	0	0	0	0	0	0	0	0	0	0	0	0	0	0	0	0.701	0.788	0.818	0.639	2.251	0.855	0.884	0.000	0.000	0.000	0.000	0.000	0.000	0.000	0.000	0.000	0.000	0.000	0.000	0.000	0.000	52	340	1201	1860	-0.512	Error	Error	495	706	0	0	820	1040	0	0	0	0
3	15	11	""	"iYBR107C"	13430	26640	70	900	891	495	105	105	42	100	100	0	1612	1595	796	100	105	33	100	100	0	0	0	0	0	0	0	0	0	0	0	0	0	0	0	0	0	0	0	0.526	0.526	0.464	0.493	1.834	0.531	0.840	0.000	0.000	0.000	0.000	0.000	0.000	0.000	0.000	0.000	0.000	0.000	0.000	0.000	0.000	32	236	2307	2281	-0.927	Error	Error	795	1512	0	0	786	1495	0	0	0	0
3	16	11	""	"iYBR126C"	13640	26650	80	243	363	309	99	103	41	86	71	0	415	505	384	100	108	38	96	88	0	0	0	0	0	0	0	0	0	0	0	0	0	0	0	0	0	0	0	0.457	0.652	0.631	0.552	2.315	0.712	0.681	0.000	0.000	0.000	0.000	0.000	0.000	0.000	0.000	0.000	0.000	0.000	0.000	0.000	0.000	52	340	459	669	-1.129	Error	Error	144	315	0	0	264	405	0	0	0	0
3	17	11	""	"iYBR130C"	13850	26640	70	1068	1224	681	98	105	43	100	100	0	1652	1685	706	97	108	46	100	100	0	0	0	0	0	0	0	0	0	0	0	0	0	0	0	0	0	0	0	0.624	0.709	0.742	0.627	1.658	0.754	0.874	0.000	0.000	0.000	0.000	0.000	0.000	0.000	0.000	0.000	0.000	0.000	0.000	0.000	0.000	32	236	2525	2714	-0.681	Error	Error	970	1555	0	0	1126	1588	0	0	0	0
3	18	11	""	"iYBR135W"	14050	26640	80	420	766	669	95	101	43	92	86	0	806	1215	894	95	105	42	100	100	0	0	0	0	0	0	0	0	0	0	0	0	0	0	0	0	0	0	0	0.457	0.599	0.543	0.445	2.213	0.656	0.880	0.000	0.000	0.000	0.000	0.000	0.000	0.000	0.000	0.000	0.000	0.000	0.000	0.000	0.000	52	340	1036	1791	-1.129	Error	Error	325	711	0	0	671	1120	0	0	0	0
3	19	11	""	"iYDL248W-0"	14240	26640	70	466	1170	1523	101	106	48	84	78	0	745	1372	1943	101	107	36	100	100	0	0	0	0	0	0	0	0	0	0	0	0	0	0	0	0	0	0	0	0.567	0.841	0.595	0.541	3.300	0.759	0.672	0.000	0.000	0.000	0.000	0.000	0.000	0.000	0.000	0.000	0.000	0.000	0.000	0.000	0.000	32	236	1009	2340	-0.819	Error	Error	365	644	0	0	1069	1271	0	0	0	0
3	20	11	""	"iYDL246C-1"	14450	26640	80	643	1352	1447	94	102	42	90	84	0	1539	2540	2354	95	101	33	100	100	0	0	0	0	0	0	0	0	0	0	0	0	0	0	0	0	0	0	0	0.380	0.515	0.465	0.405	2.430	0.556	0.897	0.000	0.000	0.000	0.000	0.000	0.000	0.000	0.000	0.000	0.000	0.000	0.000	0.000	0.000	52	340	1993	3703	-1.395	Error	Error	549	1444	0	0	1258	2445	0	0	0	0
3	21	11	""	"iYDL243C"	14640	26630	80	566	1438	1601	97	105	43	96	88	0	1110	2201	2344	94	102	42	100	100	0	0	0	0	0	0	0	0	0	0	0	0	0	0	0	0	0	0	0	0.462	0.636	0.609	0.538	2.108	0.656	0.926	0.000	0.000	0.000	0.000	0.000	0.000	0.000	0.000	0.000	0.000	0.000	0.000	0.000	0.000	52	340	1485	3448	-1.115	Error	Error	469	1016	0	0	1341	2107	0	0	0	0
3	1	12	""	"iYDL227C-0"	10630	26860	70	511	1270	1681	102	108	46	93	90	0	744	1697	2082	119	122	31	100	100	0	0	0	0	0	0	0	0	0	0	0	0	0	0	0	0	0	0	0	0.654	0.740	0.659	0.631	2.108	0.764	0.795	0.000	0.000	0.000	0.000	0.000	0.000	0.000	0.000	0.000	0.000	0.000	0.000	0.000	0.000	32	220	1034	2746	-0.612	Error	Error	409	625	0	0	1168	1578	0	0	0	0
3	2	12	""	"iYDL225W"	10830	26860	70	1047	1405	1135	105	107	42	100	100	0	503	860	697	118	120	32	100	90	0	0	0	0	0	0	0	0	0	0	0	0	0	0	0	0	0	0	0	2.447	1.752	1.963	1.759	2.140	1.741	0.879	0.000	0.000	0.000	0.000	0.000	0.000	0.000	0.000	0.000	0.000	0.000	0.000	0.000	0.000	32	236	1327	2042	1.291	Error	Error	942	385	0	0	1300	742	0	0	0	0
3	3	12	""	"iYDL220C"	11040	26850	80	276	569	581	101	107	42	86	78	0	347	627	580	117	120	31	98	92	0	0	0	0	0	0	0	0	0	0	0	0	0	0	0	0	0	0	0	0.761	0.918	0.898	0.893	2.360	0.966	0.875	0.000	0.000	0.000	0.000	0.000	0.000	0.000	0.000	0.000	0.000	0.000	0.000	0.000	0.000	52	340	405	978	-0.394	Error	Error	175	230	0	0	468	510	0	0	0	0
3	4	12	""	"iYDL207W"	11230	26860	90	686	739	416	100	106	53	98	92	0	946	1179	655	120	129	101	98	94	0	0	0	0	0	0	0	0	0	0	0	0	0	0	0	0	0	0	0	0.709	0.603	0.602	0.588	2.105	0.597	0.871	0.000	0.000	0.000	0.000	0.000	0.000	0.000	0.000	0.000	0.000	0.000	0.000	0.000	0.000	52	420	1412	1698	-0.495	Error	Error	586	826	0	0	639	1059	0	0	0	0
3	5	12	""	"iYDL203C"	11450	26850	80	476	728	660	97	102	40	94	86	0	678	1230	1148	120	121	30	100	100	0	0	0	0	0	0	0	0	0	0	0	0	0	0	0	0	0	0	0	0.679	0.568	0.574	0.528	1.858	0.548	0.858	0.000	0.000	0.000	0.000	0.000	0.000	0.000	0.000	0.000	0.000	0.000	0.000	0.000	0.000	52	340	937	1741	-0.558	Error	Error	379	558	0	0	631	1110	0	0	0	0
3	6	12	""	"iYDL199C"	11630	26850	80	315	403	247	109	113	54	92	73	0	588	793	557	119	126	116	94	78	0	0	0	0	0	0	0	0	0	0	0	0	0	0	0	0	0	0	0	0.439	0.436	0.455	0.427	2.056	0.392	0.696	0.000	0.000	0.000	0.000	0.000	0.000	0.000	0.000	0.000	0.000	0.000	0.000	0.000	0.000	52	340	675	968	-1.187	Error	Error	206	469	0	0	294	674	0	0	0	0
3	7	12	""	"iYDL183C-1"	11830	26850	70	1109	1448	1215	105	144	505	65	50	0	1731	2494	2133	120	164	491	84	62	0	0	0	0	0	0	0	0	0	0	0	0	0	0	0	0	0	0	0	0.623	0.566	0.574	0.581	1.667	0.642	0.835	0.000	0.000	0.000	0.000	0.000	0.000	0.000	0.000	0.000	0.000	0.000	0.000	0.000	0.000	32	236	2615	3717	-0.682	Error	Error	1004	1611	0	0	1343	2374	0	0	0	0
3	8	12	""	"iYDL179W"	12030	26850	70	417	724	646	104	111	55	93	84	0	588	1050	940	111	119	40	100	100	0	0	0	0	0	0	0	0	0	0	0	0	0	0	0	0	0	0	0	0.656	0.660	0.511	0.584	1.757	0.646	0.814	0.000	0.000	0.000	0.000	0.000	0.000	0.000	0.000	0.000	0.000	0.000	0.000	0.000	0.000	32	236	790	1559	-0.608	Error	Error	313	477	0	0	620	939	0	0	0	0
3	9	12	""	"iYDL175C"	12250	26860	80	490	794	717	99	103	44	98	92	0	620	765	517	114	118	36	98	96	0	0	0	0	0	0	0	0	0	0	0	0	0	0	0	0	0	0	0	0.773	1.068	1.025	0.910	2.070	1.251	0.800	0.000	0.000	0.000	0.000	0.000	0.000	0.000	0.000	0.000	0.000	0.000	0.000	0.000	0.000	52	340	897	1346	-0.372	Error	Error	391	506	0	0	695	651	0	0	0	0
3	10	12	""	"iYDR127W"	12440	26850	70	336	438	330	96	106	56	90	78	0	450	670	441	110	115	41	100	100	0	0	0	0	0	0	0	0	0	0	0	0	0	0	0	0	0	0	0	0.706	0.611	0.572	0.521	2.269	0.633	0.782	0.000	0.000	0.000	0.000	0.000	0.000	0.000	0.000	0.000	0.000	0.000	0.000	0.000	0.000	32	236	580	902	-0.503	Error	Error	240	340	0	0	342	560	0	0	0	0
3	11	12	""	"iYDR131C"	12630	26850	80	265	444	404	97	105	46	86	71	0	494	828	825	107	112	35	98	94	0	0	0	0	0	0	0	0	0	0	0	0	0	0	0	0	0	0	0	0.434	0.481	0.442	0.498	2.266	0.464	0.851	0.000	0.000	0.000	0.000	0.000	0.000	0.000	0.000	0.000	0.000	0.000	0.000	0.000	0.000	52	340	555	1068	-1.204	Error	Error	168	387	0	0	347	721	0	0	0	0
3	12	12	""	"iYDR137W"	12830	26850	70	369	520	406	99	104	46	90	84	0	583	856	618	107	119	147	96	81	0	0	0	0	0	0	0	0	0	0	0	0	0	0	0	0	0	0	0	0.567	0.562	0.538	0.496	2.281	0.562	0.726	0.000	0.000	0.000	0.000	0.000	0.000	0.000	0.000	0.000	0.000	0.000	0.000	0.000	0.000	32	236	746	1170	-0.818	Error	Error	270	476	0	0	421	749	0	0	0	0
3	13	12	""	"iYDR155C"	13050	26850	70	394	391	204	96	110	104	81	68	0	590	697	413	102	114	91	100	93	0	0	0	0	0	0	0	0	0	0	0	0	0	0	0	0	0	0	0	0.611	0.496	0.460	0.441	2.097	0.459	0.723	0.000	0.000	0.000	0.000	0.000	0.000	0.000	0.000	0.000	0.000	0.000	0.000	0.000	0.000	32	236	786	890	-0.712	Error	Error	298	488	0	0	295	595	0	0	0	0
3	14	12	""	"iYDR161W"	13230	26840	70	1627	1945	1195	99	107	47	100	96	0	1032	1314	736	103	110	34	100	100	0	0	0	0	0	0	0	0	0	0	0	0	0	0	0	0	0	0	0	1.645	1.524	1.533	1.354	1.785	1.593	0.852	0.000	0.000	0.000	0.000	0.000	0.000	0.000	0.000	0.000	0.000	0.000	0.000	0.000	0.000	32	236	2457	3057	0.718	Error	Error	1528	929	0	0	1846	1211	0	0	0	0
3	15	12	""	"iYDR165W"	13430	26850	70	394	562	422	99	104	41	96	90	0	509	714	469	102	109	41	100	96	0	0	0	0	0	0	0	0	0	0	0	0	0	0	0	0	0	0	0	0.725	0.757	0.630	0.602	2.209	0.799	0.778	0.000	0.000	0.000	0.000	0.000	0.000	0.000	0.000	0.000	0.000	0.000	0.000	0.000	0.000	32	236	702	1075	-0.464	Error	Error	295	407	0	0	463	612	0	0	0	0
3	16	12	""	"iYDR177W"	13630	26850	80	406	762	753	101	102	39	86	78	0	812	1520	1442	96	103	37	96	94	0	0	0	0	0	0	0	0	0	0	0	0	0	0	0	0	0	0	0	0.426	0.464	0.464	0.364	3.298	0.480	0.874	0.000	0.000	0.000	0.000	0.000	0.000	0.000	0.000	0.000	0.000	0.000	0.000	0.000	0.000	52	340	1021	2085	-1.231	Error	Error	305	716	0	0	661	1424	0	0	0	0
3	17	12	""	"iYDR180W"	13830	26850	70	345	625	541	106	108	45	84	81	0	408	503	341	96	103	41	93	84	0	0	0	0	0	0	0	0	0	0	0	0	0	0	0	0	0	0	0	0.766	1.275	1.365	1.052	3.197	1.430	0.701	0.000	0.000	0.000	0.000	0.000	0.000	0.000	0.000	0.000	0.000	0.000	0.000	0.000	0.000	32	236	551	926	-0.385	Error	Error	239	312	0	0	519	407	0	0	0	0
3	18	12	""	"iYDR184C"	14040	26840	80	329	717	810	95	100	43	88	80	0	449	800	803	91	99	59	96	86	0	0	0	0	0	0	0	0	0	0	0	0	0	0	0	0	0	0	0	0.654	0.877	0.745	0.784	2.269	0.961	0.843	0.000	0.000	0.000	0.000	0.000	0.000	0.000	0.000	0.000	0.000	0.000	0.000	0.000	0.000	52	340	592	1331	-0.613	Error	Error	234	358	0	0	622	709	0	0	0	0
3	19	12	""	"iYDR204W"	14250	26840	80	259	435	427	93	97	41	82	71	0	619	1144	1184	92	99	34	98	98	0	0	0	0	0	0	0	0	0	0	0	0	0	0	0	0	0	0	0	0.315	0.325	0.334	0.300	2.417	0.322	0.795	0.000	0.000	0.000	0.000	0.000	0.000	0.000	0.000	0.000	0.000	0.000	0.000	0.000	0.000	52	340	693	1394	-1.667	Error	Error	166	527	0	0	342	1052	0	0	0	0
3	20	12	""	"iYDR208W"	14440	26840	80	344	524	474	96	100	39	96	80	0	728	1140	977	93	98	34	100	100	0	0	0	0	0	0	0	0	0	0	0	0	0	0	0	0	0	0	0	0.391	0.409	0.437	0.346	2.135	0.428	0.858	0.000	0.000	0.000	0.000	0.000	0.000	0.000	0.000	0.000	0.000	0.000	0.000	0.000	0.000	52	340	883	1475	-1.356	Error	Error	248	635	0	0	428	1047	0	0	0	0
3	21	12	""	"itI(UAU)D"	14630	26840	60	515	682	461	102	108	48	93	87	0	937	1234	714	88	93	27	100	100	0	0	0	0	0	0	0	0	0	0	0	0	0	0	0	0	0	0	0	0.486	0.506	0.402	0.418	2.286	0.526	0.774	0.000	0.000	0.000	0.000	0.000	0.000	0.000	0.000	0.000	0.000	0.000	0.000	0.000	0.000	32	176	1262	1726	-1.040	Error	Error	413	849	0	0	580	1146	0	0	0	0
3	1	13	""	"iYDR521W"	10650	27060	90	745	728	378	101	106	43	98	98	0	1022	983	394	116	119	32	100	100	0	0	0	0	0	0	0	0	0	0	0	0	0	0	0	0	0	0	0	0.711	0.723	0.644	0.639	1.644	0.741	0.772	0.000	0.000	0.000	0.000	0.000	0.000	0.000	0.000	0.000	0.000	0.000	0.000	0.000	0.000	52	420	1550	1494	-0.492	Error	Error	644	906	0	0	627	867	0	0	0	0
3	2	13	""	"iYDR525W"	10840	27060	70	336	321	135	104	108	43	87	78	0	534	505	148	120	123	36	100	100	0	0	0	0	0	0	0	0	0	0	0	0	0	0	0	0	0	0	0	0.560	0.564	0.560	0.537	1.778	0.643	0.637	0.000	0.000	0.000	0.000	0.000	0.000	0.000	0.000	0.000	0.000	0.000	0.000	0.000	0.000	32	236	646	602	-0.836	Error	Error	232	414	0	0	217	385	0	0	0	0
3	3	13	""	"iYDR528W"	11040	27060	70	716	706	324	107	113	57	100	96	0	693	720	353	119	123	33	100	96	0	0	0	0	0	0	0	0	0	0	0	0	0	0	0	0	0	0	0	1.061	0.997	1.097	1.054	1.919	1.163	0.706	0.000	0.000	0.000	0.000	0.000	0.000	0.000	0.000	0.000	0.000	0.000	0.000	0.000	0.000	32	236	1183	1200	0.085	Error	Error	609	574	0	0	599	601	0	0	0	0
3	4	13	""	"iYDR541C-0"	11240	27060	70	925	1149	669	102	112	69	100	93	0	1743	1781	957	119	124	35	100	100	0	0	0	0	0	0	0	0	0	0	0	0	0	0	0	0	0	0	0	0.507	0.630	0.604	0.570	1.670	0.639	0.744	0.000	0.000	0.000	0.000	0.000	0.000	0.000	0.000	0.000	0.000	0.000	0.000	0.000	0.000	32	236	2447	2709	-0.981	Error	Error	823	1624	0	0	1047	1662	0	0	0	0
3	5	13	""	"iYDR544C"	11430	27050	90	7037	6702	3527	104	110	57	100	100	0	9972	10362	5742	123	131	41	100	100	0	0	0	0	0	0	0	0	0	0	0	0	0	0	0	0	0	0	0	0.704	0.644	0.600	0.650	2.411	0.589	0.808	0.000	0.000	0.000	0.000	0.000	0.000	0.000	0.000	0.000	0.000	0.000	0.000	0.000	0.000	52	420	16782	16837	-0.506	Error	Error	6933	9849	0	0	6598	10239	0	0	0	0
3	6	13	""	"iYEL073C-0"	11650	27050	80	1371	1379	607	104	112	71	100	100	0	2205	2246	804	127	138	118	100	100	0	0	0	0	0	0	0	0	0	0	0	0	0	0	0	0	0	0	0	0.610	0.602	0.555	0.574	1.703	0.607	0.746	0.000	0.000	0.000	0.000	0.000	0.000	0.000	0.000	0.000	0.000	0.000	0.000	0.000	0.000	52	340	3345	3394	-0.714	Error	Error	1267	2078	0	0	1275	2119	0	0	0	0
3	7	13	""	"iYEL063C"	11840	27050	80	914	987	579	105	110	46	98	94	0	1618	1638	688	121	128	44	100	100	0	0	0	0	0	0	0	0	0	0	0	0	0	0	0	0	0	0	0	0.540	0.581	0.537	0.512	2.108	0.616	0.735	0.000	0.000	0.000	0.000	0.000	0.000	0.000	0.000	0.000	0.000	0.000	0.000	0.000	0.000	52	340	2306	2399	-0.888	Error	Error	809	1497	0	0	882	1517	0	0	0	0
3	8	13	""	"iYEL059W"	12040	27050	80	501	515	244	107	112	47	96	94	0	1026	1029	438	114	122	53	98	94	0	0	0	0	0	0	0	0	0	0	0	0	0	0	0	0	0	0	0	0.432	0.446	0.432	0.425	2.290	0.427	0.684	0.000	0.000	0.000	0.000	0.000	0.000	0.000	0.000	0.000	0.000	0.000	0.000	0.000	0.000	52	340	1306	1323	-1.211	Error	Error	394	912	0	0	408	915	0	0	0	0
3	9	13	""	"iYEL055C"	12230	27050	90	1322	1380	795	101	118	224	96	78	0	1306	1491	845	114	118	40	90	90	0	0	0	0	0	0	0	0	0	0	0	0	0	0	0	0	0	0	0	1.024	0.929	0.915	1.002	2.648	0.819	0.529	0.000	0.000	0.000	0.000	0.000	0.000	0.000	0.000	0.000	0.000	0.000	0.000	0.000	0.000	52	420	2413	2656	0.035	Error	Error	1221	1192	0	0	1279	1377	0	0	0	0
3	10	13	""	"iYEL042W"	12430	27050	80	1068	1160	660	99	107	48	100	98	0	1978	1879	899	111	115	36	100	96	0	0	0	0	0	0	0	0	0	0	0	0	0	0	0	0	0	0	0	0.519	0.600	0.567	0.589	2.085	0.600	0.791	0.000	0.000	0.000	0.000	0.000	0.000	0.000	0.000	0.000	0.000	0.000	0.000	0.000	0.000	52	340	2836	2829	-0.946	Error	Error	969	1867	0	0	1061	1768	0	0	0	0
3	11	13	""	"iYEL038W"	12630	27060	70	228	258	122	95	106	86	75	37	0	329	313	151	106	114	61	84	68	0	0	0	0	0	0	0	0	0	0	0	0	0	0	0	0	0	0	0	0.596	0.787	0.761	0.650	2.344	0.793	0.449	0.000	0.000	0.000	0.000	0.000	0.000	0.000	0.000	0.000	0.000	0.000	0.000	0.000	0.000	32	236	356	370	-0.746	Error	Error	133	223	0	0	163	207	0	0	0	0
3	12	13	""	"itS(AGA)E"	12840	27050	80	317	353	173	97	101	40	94	84	0	617	718	338	103	107	32	100	100	0	0	0	0	0	0	0	0	0	0	0	0	0	0	0	0	0	0	0	0.428	0.416	0.389	0.358	1.956	0.396	0.646	0.000	0.000	0.000	0.000	0.000	0.000	0.000	0.000	0.000	0.000	0.000	0.000	0.000	0.000	52	340	734	871	-1.224	Error	Error	220	514	0	0	256	615	0	0	0	0
3	13	13	""	"iYFL044C"	13060	27040	80	448	473	168	99	103	44	98	96	0	815	789	178	102	109	48	100	100	0	0	0	0	0	0	0	0	0	0	0	0	0	0	0	0	0	0	0	0.489	0.544	0.506	0.490	1.601	0.509	0.709	0.000	0.000	0.000	0.000	0.000	0.000	0.000	0.000	0.000	0.000	0.000	0.000	0.000	0.000	52	340	1062	1061	-1.031	Error	Error	349	713	0	0	374	687	0	0	0	0
3	14	13	""	"iYFL039C"	13260	27030	80	807	1001	642	99	105	43	100	100	0	2292	2476	1494	101	108	50	100	100	0	0	0	0	0	0	0	0	0	0	0	0	0	0	0	0	0	0	0	0.323	0.380	0.370	0.384	1.569	0.383	0.884	0.000	0.000	0.000	0.000	0.000	0.000	0.000	0.000	0.000	0.000	0.000	0.000	0.000	0.000	52	340	2899	3277	-1.630	Error	Error	708	2191	0	0	902	2375	0	0	0	0
3	15	13	""	"iYFL035C-A"	13460	27040	80	676	823	539	98	104	42	98	94	0	799	1028	557	97	103	30	100	100	0	0	0	0	0	0	0	0	0	0	0	0	0	0	0	0	0	0	0	0.823	0.779	0.746	0.653	1.989	0.835	0.867	0.000	0.000	0.000	0.000	0.000	0.000	0.000	0.000	0.000	0.000	0.000	0.000	0.000	0.000	52	340	1280	1656	-0.280	Error	Error	578	702	0	0	725	931	0	0	0	0
3	16	13	""	"iYFL020C"	13650	27040	80	1594	2322	1877	102	107	45	100	100	0	1677	1998	1366	96	104	51	100	100	0	0	0	0	0	0	0	0	0	0	0	0	0	0	0	0	0	0	0	0.944	1.167	1.161	1.032	2.110	1.273	0.905	0.000	0.000	0.000	0.000	0.000	0.000	0.000	0.000	0.000	0.000	0.000	0.000	0.000	0.000	52	340	3073	4122	-0.084	Error	Error	1492	1581	0	0	2220	1902	0	0	0	0
3	17	13	""	"iYFL017C"	13850	27030	70	427	489	244	98	107	46	90	87	0	633	712	287	97	101	34	100	100	0	0	0	0	0	0	0	0	0	0	0	0	0	0	0	0	0	0	0	0.614	0.636	0.613	0.572	2.146	0.649	0.727	0.000	0.000	0.000	0.000	0.000	0.000	0.000	0.000	0.000	0.000	0.000	0.000	0.000	0.000	32	236	865	1006	-0.704	Error	Error	329	536	0	0	391	615	0	0	0	0
3	18	13	""	"iYFL013W-A"	14050	27030	90	1158	1277	827	96	105	46	100	100	0	1513	1622	1003	93	100	57	100	100	0	0	0	0	0	0	0	0	0	0	0	0	0	0	0	0	0	0	0	0.748	0.772	0.784	0.759	1.725	0.767	0.864	0.000	0.000	0.000	0.000	0.000	0.000	0.000	0.000	0.000	0.000	0.000	0.000	0.000	0.000	52	420	2482	2710	-0.419	Error	Error	1062	1420	0	0	1181	1529	0	0	0	0
3	19	13	""	"iYFR001W"	14270	27030	70	3749	3669	2450	99	101	43	100	100	0	999	1190	632	91	99	35	100	100	0	0	0	0	0	0	0	0	0	0	0	0	0	0	0	0	0	0	0	4.020	3.248	3.222	2.706	1.859	3.621	0.894	0.000	0.000	0.000	0.000	0.000	0.000	0.000	0.000	0.000	0.000	0.000	0.000	0.000	0.000	32	236	4558	4669	2.007	Error	Error	3650	908	0	0	3570	1099	0	0	0	0
3	20	13	""	"iYFR005C"	14460	27040	80	2181	3424	2763	98	102	41	100	100	0	1284	1348	813	92	97	31	100	100	0	0	0	0	0	0	0	0	0	0	0	0	0	0	0	0	0	0	0	1.747	2.648	2.470	2.042	2.068	3.102	0.877	0.000	0.000	0.000	0.000	0.000	0.000	0.000	0.000	0.000	0.000	0.000	0.000	0.000	0.000	52	340	3275	4582	0.805	Error	Error	2083	1192	0	0	3326	1256	0	0	0	0
3	21	13	""	"iYFR007W"	14650	27040	80	1302	1718	1170	101	104	48	100	100	0	1245	1383	741	89	99	82	100	100	0	0	0	0	0	0	0	0	0	0	0	0	0	0	0	0	0	0	0	1.039	1.250	1.239	1.123	1.560	1.393	0.880	0.000	0.000	0.000	0.000	0.000	0.000	0.000	0.000	0.000	0.000	0.000	0.000	0.000	0.000	52	340	2357	2911	0.055	Error	Error	1201	1156	0	0	1617	1294	0	0	0	0
3	1	14	""	"iYFR019W"	10650	27250	80	344	467	346	102	102	41	94	84	0	505	629	386	116	118	36	100	98	0	0	0	0	0	0	0	0	0	0	0	0	0	0	0	0	0	0	0	0.622	0.712	0.697	0.607	2.209	0.766	0.732	0.000	0.000	0.000	0.000	0.000	0.000	0.000	0.000	0.000	0.000	0.000	0.000	0.000	0.000	52	340	631	878	-0.685	Error	Error	242	389	0	0	365	513	0	0	0	0
3	2	14	""	"iYFR021W"	10860	27250	70	1386	1327	528	106	111	43	100	100	0	2325	2020	705	117	122	40	100	100	0	0	0	0	0	0	0	0	0	0	0	0	0	0	0	0	0	0	0	0.580	0.642	0.631	0.608	1.680	0.624	0.857	0.000	0.000	0.000	0.000	0.000	0.000	0.000	0.000	0.000	0.000	0.000	0.000	0.000	0.000	32	236	3488	3124	-0.787	Error	Error	1280	2208	0	0	1221	1903	0	0	0	0
3	3	14	""	"iYFR025C"	11050	27250	60	332	337	140	106	109	42	93	84	0	449	462	160	115	122	30	100	100	0	0	0	0	0	0	0	0	0	0	0	0	0	0	0	0	0	0	0	0.677	0.666	0.645	0.644	1.486	0.700	0.701	0.000	0.000	0.000	0.000	0.000	0.000	0.000	0.000	0.000	0.000	0.000	0.000	0.000	0.000	32	176	560	578	-0.564	Error	Error	226	334	0	0	231	347	0	0	0	0
3	4	14	""	"iYGL013C"	11250	27250	80	1848	1712	695	105	110	45	100	100	0	2271	2152	535	123	126	30	100	100	0	0	0	0	0	0	0	0	0	0	0	0	0	0	0	0	0	0	0	0.811	0.792	0.838	0.731	1.467	0.839	0.845	0.000	0.000	0.000	0.000	0.000	0.000	0.000	0.000	0.000	0.000	0.000	0.000	0.000	0.000	52	340	3891	3636	-0.301	Error	Error	1743	2148	0	0	1607	2029	0	0	0	0
3	5	14	""	"iYGL009C"	11450	27250	80	849	1378	1327	108	120	151	92	76	0	1166	1799	1442	122	133	91	100	100	0	0	0	0	0	0	0	0	0	0	0	0	0	0	0	0	0	0	0	0.710	0.757	0.690	0.606	1.894	0.832	0.876	0.000	0.000	0.000	0.000	0.000	0.000	0.000	0.000	0.000	0.000	0.000	0.000	0.000	0.000	52	340	1785	2947	-0.495	Error	Error	741	1044	0	0	1270	1677	0	0	0	0
3	6	14	""	"iYGL006W"	11650	27250	80	1640	1695	743	110	167	795	80	50	0	907	916	222	125	132	77	100	100	0	0	0	0	0	0	0	0	0	0	0	0	0	0	0	0	0	0	0	1.957	2.004	1.893	1.825	1.719	4.780	0.447	0.000	0.000	0.000	0.000	0.000	0.000	0.000	0.000	0.000	0.000	0.000	0.000	0.000	0.000	52	340	2312	2376	0.968	Error	Error	1530	782	0	0	1585	791	0	0	0	0
3	7	14	""	"iYGR011W"	11850	27250	80	764	1096	934	103	126	214	78	61	0	948	1304	943	118	131	119	100	98	0	0	0	0	0	0	0	0	0	0	0	0	0	0	0	0	0	0	0	0.796	0.837	0.769	0.621	2.218	0.906	0.923	0.000	0.000	0.000	0.000	0.000	0.000	0.000	0.000	0.000	0.000	0.000	0.000	0.000	0.000	52	340	1491	2179	-0.328	Error	Error	661	830	0	0	993	1186	0	0	0	0
3	8	14	""	"iYGR015C"	12040	27240	70	883	991	509	103	182	764	50	12	0	824	935	434	117	185	963	34	0	0	0	0	0	0	0	0	0	0	0	0	0	0	0	0	0	0	0	0	1.103	1.086	1.040	1.060	1.545	1.058	0.848	0.000	0.000	0.000	0.000	0.000	0.000	0.000	0.000	0.000	0.000	0.000	0.000	0.000	0.000	32	236	1487	1706	0.142	Error	Error	780	707	0	0	888	818	0	0	0	0
3	9	14	""	"iYGR020C"	12240	27250	80	703	854	570	100	106	41	98	96	0	969	1052	596	111	115	36	100	98	0	0	0	0	0	0	0	0	0	0	0	0	0	0	0	0	0	0	0	0.703	0.801	0.829	0.701	2.063	0.850	0.868	0.000	0.000	0.000	0.000	0.000	0.000	0.000	0.000	0.000	0.000	0.000	0.000	0.000	0.000	52	340	1461	1695	-0.509	Error	Error	603	858	0	0	754	941	0	0	0	0
3	10	14	""	"iYGR034W"	12450	27240	80	537	1153	1070	97	103	42	100	100	0	640	833	586	105	107	26	100	98	0	0	0	0	0	0	0	0	0	0	0	0	0	0	0	0	0	0	0	0.822	1.451	1.211	1.193	2.058	1.709	0.823	0.000	0.000	0.000	0.000	0.000	0.000	0.000	0.000	0.000	0.000	0.000	0.000	0.000	0.000	52	340	975	1784	-0.282	Error	Error	440	535	0	0	1056	728	0	0	0	0
3	11	14	""	"iYGR038W"	12650	27240	70	479	606	358	97	104	41	100	96	0	583	681	356	106	111	30	100	96	0	0	0	0	0	0	0	0	0	0	0	0	0	0	0	0	0	0	0	0.801	0.885	0.882	0.870	2.042	0.886	0.671	0.000	0.000	0.000	0.000	0.000	0.000	0.000	0.000	0.000	0.000	0.000	0.000	0.000	0.000	32	236	859	1084	-0.320	Error	Error	382	477	0	0	509	575	0	0	0	0
3	12	14	""	"iYGR039W"	12840	27240	60	546	568	296	99	106	41	100	93	0	711	799	387	100	104	27	100	100	0	0	0	0	0	0	0	0	0	0	0	0	0	0	0	0	0	0	0	0.732	0.671	0.614	0.628	1.826	0.667	0.800	0.000	0.000	0.000	0.000	0.000	0.000	0.000	0.000	0.000	0.000	0.000	0.000	0.000	0.000	32	176	1058	1168	-0.451	Error	Error	447	611	0	0	469	699	0	0	0	0
3	13	14	""	"iYGR055W"	13060	27240	90	872	1092	643	98	105	46	100	98	0	1658	1841	983	101	106	32	100	100	0	0	0	0	0	0	0	0	0	0	0	0	0	0	0	0	0	0	0	0.497	0.571	0.570	0.536	1.658	0.578	0.864	0.000	0.000	0.000	0.000	0.000	0.000	0.000	0.000	0.000	0.000	0.000	0.000	0.000	0.000	52	420	2331	2734	-1.008	Error	Error	774	1557	0	0	994	1740	0	0	0	0
3	14	14	""	"iYGR059W"	13250	27240	70	1188	1092	475	100	104	41	100	100	0	1370	1359	612	102	110	35	100	100	0	0	0	0	0	0	0	0	0	0	0	0	0	0	0	0	0	0	0	0.858	0.789	0.777	0.785	1.562	0.760	0.870	0.000	0.000	0.000	0.000	0.000	0.000	0.000	0.000	0.000	0.000	0.000	0.000	0.000	0.000	32	236	2356	2249	-0.221	Error	Error	1088	1268	0	0	992	1257	0	0	0	0
3	15	14	""	"iYGR062C"	13440	27240	70	378	504	327	98	104	48	100	90	0	651	887	525	102	106	36	100	100	0	0	0	0	0	0	0	0	0	0	0	0	0	0	0	0	0	0	0	0.510	0.517	0.506	0.485	1.753	0.535	0.830	0.000	0.000	0.000	0.000	0.000	0.000	0.000	0.000	0.000	0.000	0.000	0.000	0.000	0.000	32	236	829	1191	-0.971	Error	Error	280	549	0	0	406	785	0	0	0	0
3	16	14	""	"iYHR001W"	13640	27240	80	2312	3816	3275	101	103	42	100	100	0	1114	1379	969	97	101	32	100	96	0	0	0	0	0	0	0	0	0	0	0	0	0	0	0	0	0	0	0	2.174	2.898	2.953	2.673	2.115	3.241	0.910	0.000	0.000	0.000	0.000	0.000	0.000	0.000	0.000	0.000	0.000	0.000	0.000	0.000	0.000	52	340	3228	4997	1.120	Error	Error	2211	1017	0	0	3715	1282	0	0	0	0
3	17	14	""	"iYHR004C"	13860	27240	80	1536	2194	1596	97	102	42	100	100	0	1096	1331	781	94	101	34	100	100	0	0	0	0	0	0	0	0	0	0	0	0	0	0	0	0	0	0	0	1.436	1.695	1.731	1.499	1.516	1.880	0.906	0.000	0.000	0.000	0.000	0.000	0.000	0.000	0.000	0.000	0.000	0.000	0.000	0.000	0.000	52	340	2441	3334	0.522	Error	Error	1439	1002	0	0	2097	1237	0	0	0	0
3	18	14	""	"iYHRCdelta4"	14040	27230	90	5700	4987	2439	99	106	48	100	100	0	3623	3456	1552	92	105	87	100	100	0	0	0	0	0	0	0	0	0	0	0	0	0	0	0	0	0	0	0	1.586	1.453	1.442	1.360	1.702	1.474	0.877	0.000	0.000	0.000	0.000	0.000	0.000	0.000	0.000	0.000	0.000	0.000	0.000	0.000	0.000	52	414	9132	8252	0.666	Error	Error	5601	3531	0	0	4888	3364	0	0	0	0
3	19	14	""	"iYHR017W"	14240	27230	90	402	696	614	101	106	45	98	96	0	465	678	516	95	100	35	92	90	0	0	0	0	0	0	0	0	0	0	0	0	0	0	0	0	0	0	0	0.814	1.021	0.907	0.969	2.285	1.123	0.813	0.000	0.000	0.000	0.000	0.000	0.000	0.000	0.000	0.000	0.000	0.000	0.000	0.000	0.000	52	420	671	1178	-0.298	Error	Error	301	370	0	0	595	583	0	0	0	0
3	20	14	""	"iYHRCsigma2"	14440	27240	70	335	544	485	100	107	45	96	84	0	433	590	435	90	96	31	100	96	0	0	0	0	0	0	0	0	0	0	0	0	0	0	0	0	0	0	0	0.685	0.888	0.730	0.708	2.316	0.966	0.732	0.000	0.000	0.000	0.000	0.000	0.000	0.000	0.000	0.000	0.000	0.000	0.000	0.000	0.000	32	236	578	944	-0.546	Error	Error	235	343	0	0	444	500	0	0	0	0
3	21	14	""	"iYHR023W"	14650	27230	80	793	1753	2026	92	99	43	98	94	0	716	1114	940	90	95	33	100	100	0	0	0	0	0	0	0	0	0	0	0	0	0	0	0	0	0	0	0	1.120	1.622	1.135	1.080	2.188	1.982	0.902	0.000	0.000	0.000	0.000	0.000	0.000	0.000	0.000	0.000	0.000	0.000	0.000	0.000	0.000	52	340	1327	2685	0.163	Error	Error	701	626	0	0	1661	1024	0	0	0	0
3	1	15	""	"iYHR039C"	10660	27450	80	374	467	294	101	106	43	94	86	0	536	644	340	115	119	32	100	100	0	0	0	0	0	0	0	0	0	0	0	0	0	0	0	0	0	0	0	0.648	0.692	0.639	0.625	1.800	0.742	0.776	0.000	0.000	0.000	0.000	0.000	0.000	0.000	0.000	0.000	0.000	0.000	0.000	0.000	0.000	52	340	694	895	-0.625	Error	Error	273	421	0	0	366	529	0	0	0	0
3	2	15	""	"iYHR042W"	10850	27450	80	299	525	499	104	108	42	94	80	0	418	658	525	120	124	38	100	100	0	0	0	0	0	0	0	0	0	0	0	0	0	0	0	0	0	0	0	0.654	0.783	0.630	0.599	2.053	0.874	0.822	0.000	0.000	0.000	0.000	0.000	0.000	0.000	0.000	0.000	0.000	0.000	0.000	0.000	0.000	52	340	493	959	-0.612	Error	Error	195	298	0	0	421	538	0	0	0	0
3	3	15	""	"iYHR046C"	11050	27450	90	773	1631	1629	102	106	40	100	100	0	673	1133	854	122	123	29	100	98	0	0	0	0	0	0	0	0	0	0	0	0	0	0	0	0	0	0	0	1.218	1.512	1.210	1.200	2.008	1.757	0.894	0.000	0.000	0.000	0.000	0.000	0.000	0.000	0.000	0.000	0.000	0.000	0.000	0.000	0.000	52	420	1222	2540	0.284	Error	Error	671	551	0	0	1529	1011	0	0	0	0
3	4	15	""	"iYHR060W"	11240	27450	80	278	399	327	107	108	43	80	73	0	431	512	320	123	127	32	98	96	0	0	0	0	0	0	0	0	0	0	0	0	0	0	0	0	0	0	0	0.555	0.751	0.617	0.582	2.729	0.877	0.728	0.000	0.000	0.000	0.000	0.000	0.000	0.000	0.000	0.000	0.000	0.000	0.000	0.000	0.000	52	340	479	681	-0.849	Error	Error	171	308	0	0	292	389	0	0	0	0
3	5	15	""	"iYHR064C"	11440	27450	70	734	788	487	105	111	57	100	93	0	1495	1550	891	121	126	33	100	100	0	0	0	0	0	0	0	0	0	0	0	0	0	0	0	0	0	0	0	0.458	0.478	0.483	0.435	1.633	0.490	0.898	0.000	0.000	0.000	0.000	0.000	0.000	0.000	0.000	0.000	0.000	0.000	0.000	0.000	0.000	32	236	2003	2112	-1.127	Error	Error	629	1374	0	0	683	1429	0	0	0	0
3	6	15	""	"iYHR068W"	11650	27450	80	361	665	655	107	112	55	80	71	0	591	966	769	122	134	115	98	88	0	0	0	0	0	0	0	0	0	0	0	0	0	0	0	0	0	0	0	0.542	0.661	0.580	0.429	2.607	0.727	0.810	0.000	0.000	0.000	0.000	0.000	0.000	0.000	0.000	0.000	0.000	0.000	0.000	0.000	0.000	52	340	723	1402	-0.885	Error	Error	254	469	0	0	558	844	0	0	0	0
3	7	15	""	"iYIL023C"	11850	27440	70	1021	988	433	108	111	47	100	96	0	1923	1693	747	121	129	37	100	100	0	0	0	0	0	0	0	0	0	0	0	0	0	0	0	0	0	0	0	0.507	0.560	0.510	0.547	1.390	0.551	0.873	0.000	0.000	0.000	0.000	0.000	0.000	0.000	0.000	0.000	0.000	0.000	0.000	0.000	0.000	32	236	2715	2452	-0.981	Error	Error	913	1802	0	0	880	1572	0	0	0	0
3	8	15	""	"iYIL019W"	12050	27440	80	1560	1935	1398	103	107	47	100	100	0	1921	1969	1179	119	124	44	100	100	0	0	0	0	0	0	0	0	0	0	0	0	0	0	0	0	0	0	0	0.809	0.990	1.014	0.903	2.019	1.070	0.878	0.000	0.000	0.000	0.000	0.000	0.000	0.000	0.000	0.000	0.000	0.000	0.000	0.000	0.000	52	340	3259	3682	-0.307	Error	Error	1457	1802	0	0	1832	1850	0	0	0	0
3	9	15	""	"iYIL015W"	12260	27450	80	299	357	180	100	108	72	88	71	0	462	463	176	110	122	142	88	61	0	0	0	0	0	0	0	0	0	0	0	0	0	0	0	0	0	0	0	0.565	0.728	0.770	0.596	2.466	0.611	0.698	0.000	0.000	0.000	0.000	0.000	0.000	0.000	0.000	0.000	0.000	0.000	0.000	0.000	0.000	52	340	551	610	-0.823	Error	Error	199	352	0	0	257	353	0	0	0	0
3	10	15	""	"iYIL005W"	12460	27450	70	990	1279	1034	99	102	44	96	90	0	654	633	311	104	110	35	100	100	0	0	0	0	0	0	0	0	0	0	0	0	0	0	0	0	0	0	0	1.620	2.231	1.567	1.461	2.434	2.874	0.784	0.000	0.000	0.000	0.000	0.000	0.000	0.000	0.000	0.000	0.000	0.000	0.000	0.000	0.000	32	236	1441	1709	0.696	Error	Error	891	550	0	0	1180	529	0	0	0	0
3	11	15	""	"iYIL001W"	12650	27450	70	525	595	339	99	102	41	100	100	0	395	378	142	108	111	28	93	93	0	0	0	0	0	0	0	0	0	0	0	0	0	0	0	0	0	0	0	1.484	1.837	2.187	1.770	2.726	2.398	0.406	0.000	0.000	0.000	0.000	0.000	0.000	0.000	0.000	0.000	0.000	0.000	0.000	0.000	0.000	32	236	713	766	0.570	Error	Error	426	287	0	0	496	270	0	0	0	0
3	12	15	""	"iYIR003W"	12850	27440	70	632	840	546	96	103	43	100	100	0	589	559	234	105	111	35	100	96	0	0	0	0	0	0	0	0	0	0	0	0	0	0	0	0	0	0	0	1.107	1.639	1.620	1.472	2.108	1.928	0.651	0.000	0.000	0.000	0.000	0.000	0.000	0.000	0.000	0.000	0.000	0.000	0.000	0.000	0.000	32	236	1020	1198	0.147	Error	Error	536	484	0	0	744	454	0	0	0	0
3	13	15	""	"iYIR018W-0"	13050	27440	90	6212	5494	2327	102	108	45	100	100	0	3721	3388	1010	104	109	31	100	100	0	0	0	0	0	0	0	0	0	0	0	0	0	0	0	0	0	0	0	1.689	1.642	1.701	1.526	1.452	1.801	0.877	0.000	0.000	0.000	0.000	0.000	0.000	0.000	0.000	0.000	0.000	0.000	0.000	0.000	0.000	52	420	9727	8676	0.756	Error	Error	6110	3617	0	0	5392	3284	0	0	0	0
3	14	15	""	"iYIR020C"	13260	27440	80	629	857	622	97	103	41	98	96	0	811	1115	650	103	111	56	100	98	0	0	0	0	0	0	0	0	0	0	0	0	0	0	0	0	0	0	0	0.751	0.751	0.709	0.645	1.931	0.819	0.880	0.000	0.000	0.000	0.000	0.000	0.000	0.000	0.000	0.000	0.000	0.000	0.000	0.000	0.000	52	340	1240	1772	-0.412	Error	Error	532	708	0	0	760	1012	0	0	0	0
3	15	15	""	"iYIR022W"	13450	27440	80	1003	1341	1116	99	103	45	98	96	0	1220	1867	1358	99	108	59	100	98	0	0	0	0	0	0	0	0	0	0	0	0	0	0	0	0	0	0	0	0.806	0.702	0.631	0.567	1.977	0.748	0.897	0.000	0.000	0.000	0.000	0.000	0.000	0.000	0.000	0.000	0.000	0.000	0.000	0.000	0.000	52	340	2025	3010	-0.310	Error	Error	904	1121	0	0	1242	1768	0	0	0	0
3	16	15	""	"iYIR038C-0"	13650	27440	90	2256	2057	649	98	101	43	100	100	0	2554	2344	821	96	101	34	100	100	0	0	0	0	0	0	0	0	0	0	0	0	0	0	0	0	0	0	0	0.878	0.871	0.846	0.898	1.566	0.840	0.870	0.000	0.000	0.000	0.000	0.000	0.000	0.000	0.000	0.000	0.000	0.000	0.000	0.000	0.000	52	420	4616	4207	-0.188	Error	Error	2158	2458	0	0	1959	2248	0	0	0	0
3	17	15	""	"iYIRCdelta6-2"	13850	27430	80	3262	3194	1529	97	102	39	100	100	0	4581	4140	1519	99	104	36	100	100	0	0	0	0	0	0	0	0	0	0	0	0	0	0	0	0	0	0	0	0.706	0.766	0.763	0.694	1.598	0.786	0.879	0.000	0.000	0.000	0.000	0.000	0.000	0.000	0.000	0.000	0.000	0.000	0.000	0.000	0.000	52	340	7647	7138	-0.502	Error	Error	3165	4482	0	0	3097	4041	0	0	0	0
3	18	15	""	"iYIR042C"	14050	27430	80	3050	3136	1637	105	106	43	100	100	0	3283	3207	1467	96	104	43	100	100	0	0	0	0	0	0	0	0	0	0	0	0	0	0	0	0	0	0	0	0.924	0.974	0.964	0.950	1.601	1.006	0.882	0.000	0.000	0.000	0.000	0.000	0.000	0.000	0.000	0.000	0.000	0.000	0.000	0.000	0.000	52	340	6132	6142	-0.114	Error	Error	2945	3187	0	0	3031	3111	0	0	0	0
3	19	15	""	"iYJR076C"	14250	27430	90	1567	1511	617	102	106	44	100	100	0	1754	1616	540	96	105	50	100	100	0	0	0	0	0	0	0	0	0	0	0	0	0	0	0	0	0	0	0	0.884	0.927	0.943	0.897	1.589	0.904	0.820	0.000	0.000	0.000	0.000	0.000	0.000	0.000	0.000	0.000	0.000	0.000	0.000	0.000	0.000	52	420	3123	2929	-0.179	Error	Error	1465	1658	0	0	1409	1520	0	0	0	0
3	20	15	""	"iYJR083C"	14450	27430	80	858	848	299	97	106	43	100	100	0	1305	1265	401	95	100	36	100	100	0	0	0	0	0	0	0	0	0	0	0	0	0	0	0	0	0	0	0	0.629	0.642	0.667	0.616	1.623	0.630	0.827	0.000	0.000	0.000	0.000	0.000	0.000	0.000	0.000	0.000	0.000	0.000	0.000	0.000	0.000	52	340	1971	1921	-0.669	Error	Error	761	1210	0	0	751	1170	0	0	0	0
3	21	15	""	"iYJR089W"	14650	27440	80	2972	2918	1515	101	102	40	100	100	0	1898	1904	682	92	96	29	100	100	0	0	0	0	0	0	0	0	0	0	0	0	0	0	0	0	0	0	0	1.590	1.555	1.517	1.392	1.569	1.760	0.859	0.000	0.000	0.000	0.000	0.000	0.000	0.000	0.000	0.000	0.000	0.000	0.000	0.000	0.000	52	340	4677	4629	0.669	Error	Error	2871	1806	0	0	2817	1812	0	0	0	0
3	1	16	""	"iYJR102C"	10650	27650	90	1288	1244	530	103	110	77	98	98	0	2148	1948	687	118	124	46	100	100	0	0	0	0	0	0	0	0	0	0	0	0	0	0	0	0	0	0	0	0.584	0.623	0.642	0.590	1.734	0.612	0.854	0.000	0.000	0.000	0.000	0.000	0.000	0.000	0.000	0.000	0.000	0.000	0.000	0.000	0.000	52	420	3215	2971	-0.777	Error	Error	1185	2030	0	0	1141	1830	0	0	0	0
3	2	16	""	"iYJR106W"	10850	27650	80	944	960	519	101	107	48	98	94	0	1007	970	424	117	123	66	100	98	0	0	0	0	0	0	0	0	0	0	0	0	0	0	0	0	0	0	0	0.947	1.007	1.049	0.929	2.055	1.078	0.819	0.000	0.000	0.000	0.000	0.000	0.000	0.000	0.000	0.000	0.000	0.000	0.000	0.000	0.000	52	340	1733	1712	-0.078	Error	Error	843	890	0	0	859	853	0	0	0	0
3	3	16	""	"iYJR110W"	11050	27650	70	581	603	329	110	131	163	87	62	0	748	707	278	122	129	44	100	100	0	0	0	0	0	0	0	0	0	0	0	0	0	0	0	0	0	0	0	0.752	0.843	0.842	0.666	2.059	1.168	0.509	0.000	0.000	0.000	0.000	0.000	0.000	0.000	0.000	0.000	0.000	0.000	0.000	0.000	0.000	32	236	1097	1078	-0.410	Error	Error	471	626	0	0	493	585	0	0	0	0
3	4	16	""	"iYJR128W"	11250	27650	80	553	573	261	105	109	44	94	90	0	1315	1267	420	123	126	32	100	100	0	0	0	0	0	0	0	0	0	0	0	0	0	0	0	0	0	0	0	0.376	0.409	0.416	0.368	1.743	0.425	0.840	0.000	0.000	0.000	0.000	0.000	0.000	0.000	0.000	0.000	0.000	0.000	0.000	0.000	0.000	52	340	1640	1612	-1.412	Error	Error	448	1192	0	0	468	1144	0	0	0	0
3	5	16	""	"iYJR132W"	11460	27650	80	1335	1326	455	109	113	55	98	98	0	1191	1182	307	126	135	49	100	100	0	0	0	0	0	0	0	0	0	0	0	0	0	0	0	0	0	0	0	1.151	1.152	1.125	1.056	1.838	1.208	0.835	0.000	0.000	0.000	0.000	0.000	0.000	0.000	0.000	0.000	0.000	0.000	0.000	0.000	0.000	52	340	2291	2273	0.203	Error	Error	1226	1065	0	0	1217	1056	0	0	0	0
3	6	16	""	"iYJR136C"	11660	27640	80	386	387	150	102	109	46	98	90	0	583	590	212	126	130	34	94	94	0	0	0	0	0	0	0	0	0	0	0	0	0	0	0	0	0	0	0	0.621	0.614	0.597	0.572	1.764	0.577	0.667	0.000	0.000	0.000	0.000	0.000	0.000	0.000	0.000	0.000	0.000	0.000	0.000	0.000	0.000	52	340	741	749	-0.686	Error	Error	284	457	0	0	285	464	0	0	0	0
3	7	16	""	"iYJR151C-1"	11850	27650	90	1283	1318	601	102	107	44	100	100	0	2556	2433	837	121	124	33	100	100	0	0	0	0	0	0	0	0	0	0	0	0	0	0	0	0	0	0	0	0.485	0.526	0.561	0.485	1.564	0.541	0.859	0.000	0.000	0.000	0.000	0.000	0.000	0.000	0.000	0.000	0.000	0.000	0.000	0.000	0.000	52	420	3616	3528	-1.044	Error	Error	1181	2435	0	0	1216	2312	0	0	0	0
3	8	16	""	"iYJR153W-1"	12040	27650	90	1442	1307	500	102	110	52	100	100	0	1878	1880	649	121	130	59	100	100	0	0	0	0	0	0	0	0	0	0	0	0	0	0	0	0	0	0	0	0.763	0.685	0.701	0.655	1.549	0.654	0.833	0.000	0.000	0.000	0.000	0.000	0.000	0.000	0.000	0.000	0.000	0.000	0.000	0.000	0.000	52	420	3097	2964	-0.391	Error	Error	1340	1757	0	0	1205	1759	0	0	0	0
3	9	16	""	"iYJR157W-0"	12260	27650	80	4801	4515	1773	104	110	54	100	100	0	3863	3750	965	115	125	69	100	100	0	0	0	0	0	0	0	0	0	0	0	0	0	0	0	0	0	0	0	1.253	1.213	1.208	1.115	1.479	1.347	0.858	0.000	0.000	0.000	0.000	0.000	0.000	0.000	0.000	0.000	0.000	0.000	0.000	0.000	0.000	52	340	8445	8046	0.326	Error	Error	4697	3748	0	0	4411	3635	0	0	0	0
3	10	16	""	"iYKR051W"	12440	27640	90	1460	1430	575	103	108	46	100	100	0	861	890	304	110	113	28	100	100	0	0	0	0	0	0	0	0	0	0	0	0	0	0	0	0	0	0	0	1.807	1.701	1.751	1.713	1.867	1.787	0.854	0.000	0.000	0.000	0.000	0.000	0.000	0.000	0.000	0.000	0.000	0.000	0.000	0.000	0.000	52	414	2108	2107	0.854	Error	Error	1357	751	0	0	1327	780	0	0	0	0
3	11	16	""	"iYKR055W"	12640	27640	80	610	647	244	97	103	40	100	100	0	1278	1406	593	105	112	33	100	100	0	0	0	0	0	0	0	0	0	0	0	0	0	0	0	0	0	0	0	0.437	0.423	0.426	0.427	1.495	0.404	0.854	0.000	0.000	0.000	0.000	0.000	0.000	0.000	0.000	0.000	0.000	0.000	0.000	0.000	0.000	52	340	1686	1851	-1.193	Error	Error	513	1173	0	0	550	1301	0	0	0	0
3	12	16	""	"iYKR059W"	12850	27640	80	476	458	138	99	105	42	100	98	0	700	707	166	103	109	32	100	100	0	0	0	0	0	0	0	0	0	0	0	0	0	0	0	0	0	0	0	0.631	0.594	0.597	0.558	1.598	0.614	0.750	0.000	0.000	0.000	0.000	0.000	0.000	0.000	0.000	0.000	0.000	0.000	0.000	0.000	0.000	52	340	974	963	-0.663	Error	Error	377	597	0	0	359	604	0	0	0	0
3	13	16	""	"itK(UUU)K"	13040	27640	80	263	290	109	99	103	39	96	90	0	498	508	191	102	107	30	98	96	0	0	0	0	0	0	0	0	0	0	0	0	0	0	0	0	0	0	0	0.414	0.470	0.490	0.482	2.257	0.422	0.583	0.000	0.000	0.000	0.000	0.000	0.000	0.000	0.000	0.000	0.000	0.000	0.000	0.000	0.000	52	340	560	597	-1.272	Error	Error	164	396	0	0	191	406	0	0	0	0
3	14	16	""	"iYKR076W"	13240	27640	80	679	742	352	93	100	43	100	98	0	1218	1296	560	102	107	33	100	100	0	0	0	0	0	0	0	0	0	0	0	0	0	0	0	0	0	0	0	0.525	0.544	0.538	0.514	1.663	0.531	0.829	0.000	0.000	0.000	0.000	0.000	0.000	0.000	0.000	0.000	0.000	0.000	0.000	0.000	0.000	52	340	1702	1843	-0.929	Error	Error	586	1116	0	0	649	1194	0	0	0	0
3	15	16	""	"iYKR080W"	13450	27640	80	286	302	114	98	102	43	98	84	0	512	512	171	104	109	34	100	98	0	0	0	0	0	0	0	0	0	0	0	0	0	0	0	0	0	0	0	0.461	0.500	0.489	0.465	2.072	0.480	0.604	0.000	0.000	0.000	0.000	0.000	0.000	0.000	0.000	0.000	0.000	0.000	0.000	0.000	0.000	52	340	596	612	-1.118	Error	Error	188	408	0	0	204	408	0	0	0	0
3	16	16	""	"iYKR095W"	13640	27640	80	2684	3179	2029	94	101	43	100	100	0	3201	4127	2734	101	104	31	100	100	0	0	0	0	0	0	0	0	0	0	0	0	0	0	0	0	0	0	0	0.835	0.766	0.750	0.807	1.869	0.733	0.881	0.000	0.000	0.000	0.000	0.000	0.000	0.000	0.000	0.000	0.000	0.000	0.000	0.000	0.000	52	340	5690	7111	-0.259	Error	Error	2590	3100	0	0	3085	4026	0	0	0	0
3	17	16	""	"iYKR099W"	13840	27640	90	2155	2983	1925	94	103	44	100	100	0	2784	2810	1532	99	105	40	100	100	0	0	0	0	0	0	0	0	0	0	0	0	0	0	0	0	0	0	0	0.768	1.066	1.081	0.990	1.637	1.127	0.910	0.000	0.000	0.000	0.000	0.000	0.000	0.000	0.000	0.000	0.000	0.000	0.000	0.000	0.000	52	420	4746	5600	-0.382	Error	Error	2061	2685	0	0	2889	2711	0	0	0	0
3	18	16	""	"iYKR101W-2"	14050	27630	90	1762	2044	1107	100	104	43	100	100	0	3762	3907	1861	101	105	32	100	100	0	0	0	0	0	0	0	0	0	0	0	0	0	0	0	0	0	0	0	0.454	0.511	0.522	0.488	1.546	0.511	0.875	0.000	0.000	0.000	0.000	0.000	0.000	0.000	0.000	0.000	0.000	0.000	0.000	0.000	0.000	52	420	5323	5750	-1.139	Error	Error	1662	3661	0	0	1944	3806	0	0	0	0
3	19	16	""	"iYLL062C"	14250	27640	90	1389	1265	584	92	99	42	98	98	0	2108	1980	706	95	100	35	100	100	0	0	0	0	0	0	0	0	0	0	0	0	0	0	0	0	0	0	0	0.644	0.622	0.599	0.564	1.587	0.659	0.868	0.000	0.000	0.000	0.000	0.000	0.000	0.000	0.000	0.000	0.000	0.000	0.000	0.000	0.000	52	420	3310	3058	-0.634	Error	Error	1297	2013	0	0	1173	1885	0	0	0	0
3	20	16	""	"iYLL058W"	14450	27630	90	1951	1981	777	94	98	42	100	100	0	1819	1803	499	92	99	36	100	100	0	0	0	0	0	0	0	0	0	0	0	0	0	0	0	0	0	0	0	1.075	1.103	1.104	1.036	1.616	1.151	0.835	0.000	0.000	0.000	0.000	0.000	0.000	0.000	0.000	0.000	0.000	0.000	0.000	0.000	0.000	52	420	3584	3598	0.105	Error	Error	1857	1727	0	0	1887	1711	0	0	0	0
3	21	16	""	"iYLL055W"	14640	27630	90	5873	5716	2965	96	102	44	100	100	0	3239	2997	1402	92	96	33	100	100	0	0	0	0	0	0	0	0	0	0	0	0	0	0	0	0	0	0	0	1.836	1.935	1.968	2.055	2.053	2.003	0.898	0.000	0.000	0.000	0.000	0.000	0.000	0.000	0.000	0.000	0.000	0.000	0.000	0.000	0.000	52	420	8924	8525	0.876	Error	Error	5777	3147	0	0	5620	2905	0	0	0	0
3	1	17	""	"iYLRWdelta14"	10650	27850	90	470	497	210	102	108	51	98	92	0	560	602	190	119	128	75	100	100	0	0	0	0	0	0	0	0	0	0	0	0	0	0	0	0	0	0	0	0.834	0.818	0.845	0.743	1.772	0.847	0.705	0.000	0.000	0.000	0.000	0.000	0.000	0.000	0.000	0.000	0.000	0.000	0.000	0.000	0.000	52	420	809	878	-0.261	Error	Error	368	441	0	0	395	483	0	0	0	0
3	2	17	""	"iYLR259C"	10860	27850	70	1109	1234	858	100	106	42	96	93	0	1746	2042	1247	116	121	35	100	100	0	0	0	0	0	0	0	0	0	0	0	0	0	0	0	0	0	0	0	0.619	0.589	0.556	0.485	2.116	0.608	0.857	0.000	0.000	0.000	0.000	0.000	0.000	0.000	0.000	0.000	0.000	0.000	0.000	0.000	0.000	32	236	2639	3060	-0.692	Error	Error	1009	1630	0	0	1134	1926	0	0	0	0
3	3	17	""	"iYLR263W"	11040	27860	90	444	555	405	103	112	55	88	76	0	611	884	623	122	125	31	98	98	0	0	0	0	0	0	0	0	0	0	0	0	0	0	0	0	0	0	0	0.697	0.593	0.619	0.477	2.530	0.576	0.827	0.000	0.000	0.000	0.000	0.000	0.000	0.000	0.000	0.000	0.000	0.000	0.000	0.000	0.000	52	420	830	1214	-0.520	Error	Error	341	489	0	0	452	762	0	0	0	0
3	4	17	""	"iYLR281C"	11260	27860	60	207	220	74	103	125	238	9	0	0	344	376	123	122	146	191	56	15	0	0	0	0	0	0	0	0	0	0	0	0	0	0	0	0	0	0	0	0.468	0.461	0.455	0.401	2.487	0.400	0.345	0.000	0.000	0.000	0.000	0.000	0.000	0.000	0.000	0.000	0.000	0.000	0.000	0.000	0.000	32	176	326	371	-1.094	Error	Error	104	222	0	0	117	254	0	0	0	0
3	5	17	""	"iYLR286C"	11440	27850	70	1237	1462	826	108	115	49	96	96	0	2211	2272	1064	123	129	45	100	100	0	0	0	0	0	0	0	0	0	0	0	0	0	0	0	0	0	0	0	0.541	0.630	0.633	0.545	1.929	0.653	0.890	0.000	0.000	0.000	0.000	0.000	0.000	0.000	0.000	0.000	0.000	0.000	0.000	0.000	0.000	32	236	3217	3503	-0.887	Error	Error	1129	2088	0	0	1354	2149	0	0	0	0
3	6	17	""	"iYLR289W"	11660	27850	80	325	540	471	107	112	49	94	84	0	448	571	324	122	131	44	100	96	0	0	0	0	0	0	0	0	0	0	0	0	0	0	0	0	0	0	0	0.669	0.964	0.990	0.755	2.550	1.230	0.721	0.000	0.000	0.000	0.000	0.000	0.000	0.000	0.000	0.000	0.000	0.000	0.000	0.000	0.000	52	340	544	882	-0.581	Error	Error	218	326	0	0	433	449	0	0	0	0
3	7	17	""	"iYLR304C"	11850	27850	60	605	670	396	107	108	42	100	96	0	1002	1078	525	115	118	30	100	100	0	0	0	0	0	0	0	0	0	0	0	0	0	0	0	0	0	0	0	0.561	0.585	0.555	0.524	1.501	0.628	0.886	0.000	0.000	0.000	0.000	0.000	0.000	0.000	0.000	0.000	0.000	0.000	0.000	0.000	0.000	32	176	1385	1526	-0.833	Error	Error	498	887	0	0	563	963	0	0	0	0
3	8	17	""	"iYLR308W"	12040	27850	70	392	471	276	100	105	41	96	90	0	444	558	277	115	122	32	100	100	0	0	0	0	0	0	0	0	0	0	0	0	0	0	0	0	0	0	0	0.888	0.837	0.948	0.792	1.912	0.851	0.665	0.000	0.000	0.000	0.000	0.000	0.000	0.000	0.000	0.000	0.000	0.000	0.000	0.000	0.000	32	236	621	814	-0.172	Error	Error	292	329	0	0	371	443	0	0	0	0
3	9	17	""	"iYLR312W-A"	12240	27850	80	343	793	1031	100	106	46	98	84	0	571	1081	1295	112	121	42	94	90	0	0	0	0	0	0	0	0	0	0	0	0	0	0	0	0	0	0	0	0.529	0.715	0.613	0.677	2.242	0.757	0.852	0.000	0.000	0.000	0.000	0.000	0.000	0.000	0.000	0.000	0.000	0.000	0.000	0.000	0.000	52	340	702	1662	-0.918	Error	Error	243	459	0	0	693	969	0	0	0	0
3	10	17	""	"iYLR330W"	12440	27840	80	515	1143	1182	99	105	45	98	92	0	937	1936	1852	114	120	57	96	96	0	0	0	0	0	0	0	0	0	0	0	0	0	0	0	0	0	0	0	0.505	0.573	0.546	0.541	2.191	0.595	0.891	0.000	0.000	0.000	0.000	0.000	0.000	0.000	0.000	0.000	0.000	0.000	0.000	0.000	0.000	52	340	1239	2866	-0.984	Error	Error	416	823	0	0	1044	1822	0	0	0	0
3	11	17	""	"iSNR61"	12640	27850	70	379	497	315	101	103	43	100	96	0	451	612	333	109	114	30	100	100	0	0	0	0	0	0	0	0	0	0	0	0	0	0	0	0	0	0	0	0.813	0.787	0.632	0.717	1.592	0.839	0.833	0.000	0.000	0.000	0.000	0.000	0.000	0.000	0.000	0.000	0.000	0.000	0.000	0.000	0.000	32	236	620	899	-0.299	Error	Error	278	342	0	0	396	503	0	0	0	0
3	12	17	""	"iYLRWdelta20"	12840	27840	70	372	470	330	94	100	42	96	81	0	600	685	358	104	109	29	100	100	0	0	0	0	0	0	0	0	0	0	0	0	0	0	0	0	0	0	0	0.560	0.647	0.629	0.517	1.869	0.726	0.773	0.000	0.000	0.000	0.000	0.000	0.000	0.000	0.000	0.000	0.000	0.000	0.000	0.000	0.000	32	236	774	957	-0.835	Error	Error	278	496	0	0	376	581	0	0	0	0
3	13	17	""	"iYMR033W"	13030	27840	70	1119	1353	974	93	100	44	100	96	0	610	767	490	108	118	49	100	87	0	0	0	0	0	0	0	0	0	0	0	0	0	0	0	0	0	0	0	2.044	1.912	2.013	1.936	1.854	2.001	0.833	0.000	0.000	0.000	0.000	0.000	0.000	0.000	0.000	0.000	0.000	0.000	0.000	0.000	0.000	32	236	1528	1919	1.031	Error	Error	1026	502	0	0	1260	659	0	0	0	0
3	14	17	""	"iYMR037C"	13250	27840	70	512	703	467	103	110	75	96	96	0	1239	1513	1038	103	108	36	100	100	0	0	0	0	0	0	0	0	0	0	0	0	0	0	0	0	0	0	0	0.360	0.426	0.494	0.410	2.422	0.406	0.787	0.000	0.000	0.000	0.000	0.000	0.000	0.000	0.000	0.000	0.000	0.000	0.000	0.000	0.000	32	236	1545	2010	-1.474	Error	Error	409	1136	0	0	600	1410	0	0	0	0
3	15	17	""	"iYMR041C"	13450	27840	80	281	377	316	96	103	43	84	78	0	542	826	723	104	107	34	100	96	0	0	0	0	0	0	0	0	0	0	0	0	0	0	0	0	0	0	0	0.422	0.389	0.371	0.354	2.287	0.393	0.823	0.000	0.000	0.000	0.000	0.000	0.000	0.000	0.000	0.000	0.000	0.000	0.000	0.000	0.000	52	340	623	1003	-1.243	Error	Error	185	438	0	0	281	722	0	0	0	0
3	16	17	""	"iYMR054W"	13650	27840	70	412	440	281	97	105	49	93	81	0	507	588	248	96	104	42	100	96	0	0	0	0	0	0	0	0	0	0	0	0	0	0	0	0	0	0	0	0.766	0.697	0.644	0.587	2.135	0.799	0.645	0.000	0.000	0.000	0.000	0.000	0.000	0.000	0.000	0.000	0.000	0.000	0.000	0.000	0.000	32	236	726	835	-0.384	Error	Error	315	411	0	0	343	492	0	0	0	0
3	17	17	""	"iYMR058W"	13850	27840	70	443	514	287	98	102	45	96	93	0	751	817	322	94	100	31	100	100	0	0	0	0	0	0	0	0	0	0	0	0	0	0	0	0	0	0	0	0.525	0.575	0.563	0.508	1.840	0.606	0.730	0.000	0.000	0.000	0.000	0.000	0.000	0.000	0.000	0.000	0.000	0.000	0.000	0.000	0.000	32	236	1002	1139	-0.929	Error	Error	345	657	0	0	416	723	0	0	0	0
3	18	17	""	"iYMR063W"	14050	27840	70	360	421	224	95	102	42	100	93	0	640	742	329	94	101	37	100	100	0	0	0	0	0	0	0	0	0	0	0	0	0	0	0	0	0	0	0	0.485	0.503	0.467	0.460	1.877	0.511	0.759	0.000	0.000	0.000	0.000	0.000	0.000	0.000	0.000	0.000	0.000	0.000	0.000	0.000	0.000	32	236	811	974	-1.043	Error	Error	265	546	0	0	326	648	0	0	0	0
3	19	17	""	"iYMR078C"	14240	27840	70	883	1140	803	100	106	44	96	93	0	1330	1564	847	92	97	31	100	100	0	0	0	0	0	0	0	0	0	0	0	0	0	0	0	0	0	0	0	0.632	0.707	0.687	0.545	2.187	0.775	0.878	0.000	0.000	0.000	0.000	0.000	0.000	0.000	0.000	0.000	0.000	0.000	0.000	0.000	0.000	32	236	2021	2512	-0.661	Error	Error	783	1238	0	0	1040	1472	0	0	0	0
3	20	17	""	"iYMR082C-0"	14450	27840	70	748	917	614	96	101	40	100	100	0	1485	1881	1153	92	96	26	100	100	0	0	0	0	0	0	0	0	0	0	0	0	0	0	0	0	0	0	0	0.468	0.459	0.413	0.427	1.939	0.463	0.868	0.000	0.000	0.000	0.000	0.000	0.000	0.000	0.000	0.000	0.000	0.000	0.000	0.000	0.000	32	236	2045	2610	-1.095	Error	Error	652	1393	0	0	821	1789	0	0	0	0
3	21	17	""	"iYMR085W"	14640	27830	70	380	488	302	90	94	39	93	90	0	459	501	217	86	91	28	100	100	0	0	0	0	0	0	0	0	0	0	0	0	0	0	0	0	0	0	0	0.777	0.959	0.860	0.837	1.983	1.088	0.701	0.000	0.000	0.000	0.000	0.000	0.000	0.000	0.000	0.000	0.000	0.000	0.000	0.000	0.000	32	236	663	813	-0.363	Error	Error	290	373	0	0	398	415	0	0	0	0
3	1	18	""	"iYMR101C"	10650	28060	80	392	890	1011	102	121	236	53	36	0	521	791	646	118	130	117	96	84	0	0	0	0	0	0	0	0	0	0	0	0	0	0	0	0	0	0	0	0.720	1.171	0.735	0.750	2.569	1.685	0.684	0.000	0.000	0.000	0.000	0.000	0.000	0.000	0.000	0.000	0.000	0.000	0.000	0.000	0.000	52	340	693	1461	-0.475	Error	Error	290	403	0	0	788	673	0	0	0	0
3	2	18	""	"iYMR105C"	10850	28060	70	209	297	211	105	112	44	81	56	0	598	885	669	120	123	30	100	100	0	0	0	0	0	0	0	0	0	0	0	0	0	0	0	0	0	0	0	0.218	0.251	0.237	0.233	2.073	0.244	0.631	0.000	0.000	0.000	0.000	0.000	0.000	0.000	0.000	0.000	0.000	0.000	0.000	0.000	0.000	32	236	582	957	-2.200	Error	Error	104	478	0	0	192	765	0	0	0	0
3	3	18	""	"iYMR107W"	11040	28060	60	240	298	204	104	109	43	84	65	0	378	476	294	122	125	33	96	90	0	0	0	0	0	0	0	0	0	0	0	0	0	0	0	0	0	0	0	0.531	0.548	0.521	0.530	1.835	0.559	0.633	0.000	0.000	0.000	0.000	0.000	0.000	0.000	0.000	0.000	0.000	0.000	0.000	0.000	0.000	32	176	392	548	-0.913	Error	Error	136	256	0	0	194	354	0	0	0	0
3	4	18	""	"iYNL272C"	11240	28050	90	949	952	381	102	105	44	98	96	0	1299	1330	446	125	133	64	100	100	0	0	0	0	0	0	0	0	0	0	0	0	0	0	0	0	0	0	0	0.721	0.705	0.684	0.622	2.173	0.698	0.797	0.000	0.000	0.000	0.000	0.000	0.000	0.000	0.000	0.000	0.000	0.000	0.000	0.000	0.000	52	420	2021	2055	-0.471	Error	Error	847	1174	0	0	850	1205	0	0	0	0
3	5	18	""	"iYNL267W"	11440	28060	90	428	485	283	102	107	43	94	88	0	533	575	206	125	129	34	98	96	0	0	0	0	0	0	0	0	0	0	0	0	0	0	0	0	0	0	0	0.799	0.851	0.770	0.741	1.761	0.982	0.746	0.000	0.000	0.000	0.000	0.000	0.000	0.000	0.000	0.000	0.000	0.000	0.000	0.000	0.000	52	420	734	833	-0.324	Error	Error	326	408	0	0	383	450	0	0	0	0
3	6	18	""	"iYNL262W"	11640	28050	80	494	552	289	108	117	88	94	76	0	627	671	231	125	131	47	100	100	0	0	0	0	0	0	0	0	0	0	0	0	0	0	0	0	0	0	0	0.769	0.813	0.858	0.737	1.967	0.919	0.654	0.000	0.000	0.000	0.000	0.000	0.000	0.000	0.000	0.000	0.000	0.000	0.000	0.000	0.000	52	340	888	990	-0.379	Error	Error	386	502	0	0	444	546	0	0	0	0
3	7	18	""	"iYNL244C"	11840	28050	80	397	493	365	103	112	66	84	71	0	793	944	548	116	134	201	96	69	0	0	0	0	0	0	0	0	0	0	0	0	0	0	0	0	0	0	0	0.434	0.471	0.370	0.375	2.354	0.509	0.734	0.000	0.000	0.000	0.000	0.000	0.000	0.000	0.000	0.000	0.000	0.000	0.000	0.000	0.000	52	340	971	1218	-1.203	Error	Error	294	677	0	0	390	828	0	0	0	0
[truncated: 4,028,707 more chars]
