# Supplementary material for: Genome-Wide Mapping of the Cohesin Complex in the Yeast Saccharomyces cerevisiae
Source: PLoS Biol. 2004 Jul 27;2(9):e259. doi: 10.1371/journal.pbio.0020259 (PMC490026; doi:10.1371/journal.pbio.0020259)
Supplement: Dataset S47 — Cy3 = ChIP nocodazole arrest galactose Mcd1-18Myc in W303; Cy5 = genomic DNA. (4.4 MB XLS). [file pbio.0020259.sd047.xls]

ATF	1.0
27	82    
"Type=GenePix Results 2"
"DateTime=2002/09/18 09:41:25"
"Settings=L:\cohesin followup\UP6_221.gps"
"GalFile=C:\Documents and Settings\jen.JEN-W2000\Desktop\UberChip6.gal"
"PixelSize=10"
"Wavelengths=635	532"
"ImageFiles=L:\cohesin followup\UP6_221_635.tif 0	L:\cohesin followup\UP6_221_532.tif 0"
"NormalizationMethod=None"
"NormalizationFactors=1	1"
"JpegImage=L:\cohesin followup\UP6_0221.jpg"
"RatioFormulations=W1/W2 (635/532)"
"Barcode="
"BackgroundSubtraction=LocalFeature"
"ImageOrigin=640, 24690"
"JpegOrigin=1100, 25190"
"Creator=GenePix Pro 4.0.1.9"
"Scanner=GenePix 4000B [87097]"
"FocusPosition=0"
"Temperature=27.79"
"LinesAveraged=1"
"Comment=Cy5=total gDNA Cy3=1827 gal 9-5-02 NZ MycMcd1 ChIP"
"PMTGain=690	550"
"ScanPower=100	100"
"LaserPower=3.38	3.31"
"LaserOnTime=15834	15846"
"ScanRegion=64,2469,1954,6174"
"Supplier="
"Block"	"Column"	"Row"	"Name"	"ID"	"X"	"Y"	"Dia."	"F635 Median"	"F635 Mean"	"F635 SD"	"B635 Median"	"B635 Mean"	"B635 SD"	"% > B635+1SD"	"% > B635+2SD"	"F635 % Sat."	"F532 Median"	"F532 Mean"	"F532 SD"	"B532 Median"	"B532 Mean"	"B532 SD"	"% > B532+1SD"	"% > B532+2SD"	"F532 % Sat."	"F3 Median"	"F3 Mean"	"F3 SD"	"B3 Median"	"B3 Mean"	"B3 SD"	"% > B3+1SD"	"% > B3+2SD"	"F3 % Sat."	"F4 Median"	"F4 Mean"	"F4 SD"	"B4 Median"	"B4 Mean"	"B4 SD"	"% > B4+1SD"	"% > B4+2SD"	"F4 % Sat."	"Ratio of Medians (635/532)"	"Ratio of Means (635/532)"	"Median of Ratios (635/532)"	"Mean of Ratios (635/532)"	"Ratios SD (635/532)"	"Rgn Ratio (635/532)"	"Rgn R� (635/532)"	"Ratio of Medians (Ratio/2)"	"Ratio of Means (Ratio/2)"	"Median of Ratios (Ratio/2)"	"Mean of Ratios (Ratio/2)"	"Ratios SD (Ratio/2)"	"Rgn Ratio (Ratio/2)"	"Rgn R� (Ratio/2)"	"Ratio of Medians (Ratio/3)"	"Ratio of Means (Ratio/3)"	"Median of Ratios (Ratio/3)"	"Mean of Ratios (Ratio/3)"	"Ratios SD (Ratio/3)"	"Rgn Ratio (Ratio/3)"	"Rgn R� (Ratio/3)"	"F Pixels"	"B Pixels"	"Sum of Medians"	"Sum of Means"	"Log Ratio (635/532)"	"Log Ratio (Ratio/2)"	"Log Ratio (Ratio/3)"	"F635 Median - B635"	"F532 Median - B532"	"F3 Median - B3"	"F4 Median - B4"	"F635 Mean - B635"	"F532 Mean - B532"	"F3 Mean - B3"	"F4 Mean - B4"	"Flags"	"Normalize"
1	1	1	""	"YBL081W"	1390	25560	110	7478	10255	6182	121	131	76	100	100	0	6642	8913	5138	80	91	45	100	100	0	0	0	0	0	0	0	0	0	0	0	0	0	0	0	0	0	0	0	1.121	1.147	1.114	1.131	1.256	1.167	0.956	0.000	0.000	0.000	0.000	0.000	0.000	0.000	0.000	0.000	0.000	0.000	0.000	0.000	0.000	80	602	13919	18967	0.165	Error	Error	7357	6562	0	0	10134	8833	0	0	0	0
1	2	1	""	"YBL112C"	1600	25540	90	44120	43253	7126	121	135	72	100	100	0	21546	20778	4221	79	92	52	100	100	0	0	0	0	0	0	0	0	0	0	0	0	0	0	0	0	0	0	0	2.050	2.084	2.089	2.132	1.249	2.104	0.944	0.000	0.000	0.000	0.000	0.000	0.000	0.000	0.000	0.000	0.000	0.000	0.000	0.000	0.000	52	400	65466	63831	1.035	Error	Error	43999	21467	0	0	43132	20699	0	0	0	0
1	3	1	"CDS1"	"YBR029C"	1800	25540	110	3172	4360	2954	118	134	75	100	100	0	1680	2185	1353	77	88	45	98	98	0	0	0	0	0	0	0	0	0	0	0	0	0	0	0	0	0	0	0	1.905	2.012	2.034	1.989	1.510	2.117	0.935	0.000	0.000	0.000	0.000	0.000	0.000	0.000	0.000	0.000	0.000	0.000	0.000	0.000	0.000	80	608	4657	6350	0.930	Error	Error	3054	1603	0	0	4242	2108	0	0	0	0
1	4	1	""	"YBL083C"	1990	25540	60	512	696	506	131	146	85	93	84	0	349	491	356	74	91	55	100	87	0	0	0	0	0	0	0	0	0	0	0	0	0	0	0	0	0	0	0	1.385	1.355	1.277	1.184	2.538	1.449	0.768	0.000	0.000	0.000	0.000	0.000	0.000	0.000	0.000	0.000	0.000	0.000	0.000	0.000	0.000	32	148	656	982	0.470	Error	Error	381	275	0	0	565	417	0	0	0	0
1	5	1	"NTH2"	"YBR001C"	2200	25540	60	858	1522	1431	108	120	63	96	93	0	4799	8340	8096	80	88	46	100	100	0	0	0	0	0	0	0	0	0	0	0	0	0	0	0	0	0	0	0	0.159	0.171	0.169	0.165	1.836	0.166	0.903	0.000	0.000	0.000	0.000	0.000	0.000	0.000	0.000	0.000	0.000	0.000	0.000	0.000	0.000	32	148	5469	9674	-2.654	Error	Error	750	4719	0	0	1414	8260	0	0	0	0
1	6	1	"RPL4A"	"YBR031W"	2400	25540	90	2874	4622	3494	111	119	56	100	100	0	3250	4906	3626	69	77	34	100	100	0	0	0	0	0	0	0	0	0	0	0	0	0	0	0	0	0	0	0	0.869	0.933	0.902	0.912	1.388	0.931	0.923	0.000	0.000	0.000	0.000	0.000	0.000	0.000	0.000	0.000	0.000	0.000	0.000	0.000	0.000	52	400	5944	9348	-0.203	Error	Error	2763	3181	0	0	4511	4837	0	0	0	0
1	7	1	"BOI1"	"YBL085W"	2610	25540	60	187	230	127	117	130	66	56	34	0	180	211	116	74	81	38	81	59	0	0	0	0	0	0	0	0	0	0	0	0	0	0	0	0	0	0	0	0.660	0.825	1.180	0.988	2.567	1.088	0.394	0.000	0.000	0.000	0.000	0.000	0.000	0.000	0.000	0.000	0.000	0.000	0.000	0.000	0.000	32	148	176	250	-0.599	Error	Error	70	106	0	0	113	137	0	0	0	0
1	8	1	"COQ1"	"YBR003W"	2810	25540	90	5224	7120	5263	111	121	56	100	100	0	11386	11705	6904	71	79	36	100	100	0	0	0	0	0	0	0	0	0	0	0	0	0	0	0	0	0	0	0	0.452	0.602	0.557	0.560	1.477	0.642	0.905	0.000	0.000	0.000	0.000	0.000	0.000	0.000	0.000	0.000	0.000	0.000	0.000	0.000	0.000	52	400	16428	18643	-1.146	Error	Error	5113	11315	0	0	7009	11634	0	0	0	0
1	9	1	""	"YBR033W"	3000	25550	80	5373	7406	6568	112	118	55	100	100	0	7332	9702	7840	72	80	39	100	100	0	0	0	0	0	0	0	0	0	0	0	0	0	0	0	0	0	0	0	0.725	0.757	0.684	0.700	1.345	0.780	0.928	0.000	0.000	0.000	0.000	0.000	0.000	0.000	0.000	0.000	0.000	0.000	0.000	0.000	0.000	52	320	12521	16924	-0.465	Error	Error	5261	7260	0	0	7294	9630	0	0	0	0
1	10	1	"RPL23A"	"YBL087C"	3200	25550	80	7106	7304	3084	112	118	54	100	100	0	3432	3624	1650	74	83	42	100	100	0	0	0	0	0	0	0	0	0	0	0	0	0	0	0	0	0	0	0	2.083	2.026	2.051	2.100	1.428	1.997	0.916	0.000	0.000	0.000	0.000	0.000	0.000	0.000	0.000	0.000	0.000	0.000	0.000	0.000	0.000	52	320	10352	10742	1.059	Error	Error	6994	3358	0	0	7192	3550	0	0	0	0
1	11	1	""	"YBR005W"	3400	25540	70	5158	4910	1401	114	125	107	100	100	0	14982	14877	3036	77	92	95	100	100	0	0	0	0	0	0	0	0	0	0	0	0	0	0	0	0	0	0	0	0.338	0.324	0.322	0.313	1.245	0.333	0.931	0.000	0.000	0.000	0.000	0.000	0.000	0.000	0.000	0.000	0.000	0.000	0.000	0.000	0.000	32	220	19949	19596	-1.563	Error	Error	5044	14905	0	0	4796	14800	0	0	0	0
1	12	1	"PDX3"	"YBR035C"	3610	25550	80	6522	6055	1349	111	120	58	100	100	0	4830	4703	979	75	85	36	100	100	0	0	0	0	0	0	0	0	0	0	0	0	0	0	0	0	0	0	0	1.348	1.284	1.320	1.288	1.301	1.284	0.914	0.000	0.000	0.000	0.000	0.000	0.000	0.000	0.000	0.000	0.000	0.000	0.000	0.000	0.000	52	320	11166	10572	0.431	Error	Error	6411	4755	0	0	5944	4628	0	0	0	0
1	13	1	""	"YCL045C"	3810	25540	60	157	168	64	106	116	52	50	28	0	170	176	58	71	83	43	84	56	0	0	0	0	0	0	0	0	0	0	0	0	0	0	0	0	0	0	0	0.515	0.590	0.882	0.692	3.114	0.729	0.206	0.000	0.000	0.000	0.000	0.000	0.000	0.000	0.000	0.000	0.000	0.000	0.000	0.000	0.000	32	148	150	167	-0.957	Error	Error	51	99	0	0	62	105	0	0	0	0
1	14	1	""	"YCLX04W"	4020	25540	70	5947	5579	1151	104	214	665	100	100	0	2897	2694	685	67	93	191	100	100	0	0	0	0	0	0	0	0	0	0	0	0	0	0	0	0	0	0	0	2.065	2.084	2.092	2.140	1.290	1.967	0.896	0.000	0.000	0.000	0.000	0.000	0.000	0.000	0.000	0.000	0.000	0.000	0.000	0.000	0.000	32	220	8673	8102	1.046	Error	Error	5843	2830	0	0	5475	2627	0	0	0	0
1	15	1	""	"YCR023C"	4230	25540	70	1348	3208	3550	119	171	259	93	87	0	1330	2679	2704	73	110	207	96	90	0	0	0	0	0	0	0	0	0	0	0	0	0	0	0	0	0	0	0	0.978	1.185	1.092	1.104	1.609	1.257	0.877	0.000	0.000	0.000	0.000	0.000	0.000	0.000	0.000	0.000	0.000	0.000	0.000	0.000	0.000	32	220	2486	5695	-0.032	Error	Error	1229	1257	0	0	3089	2606	0	0	0	0
1	16	1	""	"YCL047C"	4410	25550	70	148	154	68	104	113	55	46	18	0	158	165	59	71	79	33	87	62	0	0	0	0	0	0	0	0	0	0	0	0	0	0	0	0	0	0	0	0.506	0.532	0.934	0.877	2.675	1.151	0.153	0.000	0.000	0.000	0.000	0.000	0.000	0.000	0.000	0.000	0.000	0.000	0.000	0.000	0.000	32	230	131	144	-0.984	Error	Error	44	87	0	0	50	94	0	0	0	0
1	17	1	""	"YCLX06C"	4610	25540	70	6496	5693	1790	111	162	325	100	100	0	4469	3967	1343	77	162	491	96	93	0	0	0	0	0	0	0	0	0	0	0	0	0	0	0	0	0	0	0	1.454	1.435	1.437	1.501	1.516	1.408	0.902	0.000	0.000	0.000	0.000	0.000	0.000	0.000	0.000	0.000	0.000	0.000	0.000	0.000	0.000	32	220	10777	9472	0.540	Error	Error	6385	4392	0	0	5582	3890	0	0	0	0
1	18	1	"PMP1"	"YCR024C-A"	4810	25550	80	1395	1407	379	99	107	51	100	100	0	818	864	266	67	73	32	100	100	0	0	0	0	0	0	0	0	0	0	0	0	0	0	0	0	0	0	0	1.726	1.641	1.604	1.670	1.376	1.682	0.868	0.000	0.000	0.000	0.000	0.000	0.000	0.000	0.000	0.000	0.000	0.000	0.000	0.000	0.000	52	320	2047	2105	0.787	Error	Error	1296	751	0	0	1308	797	0	0	0	0
1	19	1	""	"YCL049C"	5020	25560	150	114	119	53	106	119	127	3	0	0	74	87	44	68	77	61	14	2	0	0	0	0	0	0	0	0	0	0	0	0	0	0	0	0	0	0	0	1.333	0.684	1.653	1.613	3.706	18.163	0.017	0.000	0.000	0.000	0.000	0.000	0.000	0.000	0.000	0.000	0.000	0.000	0.000	0.000	0.000	156	1105	14	32	0.415	Error	Error	8	6	0	0	13	19	0	0	-50	0
1	20	1	""	"YCLX08C"	5220	25540	70	5011	4875	777	116	152	262	100	100	0	4307	4266	719	75	92	117	100	100	0	0	0	0	0	0	0	0	0	0	0	0	0	0	0	0	0	0	0	1.157	1.136	1.155	1.141	1.222	1.111	0.902	0.000	0.000	0.000	0.000	0.000	0.000	0.000	0.000	0.000	0.000	0.000	0.000	0.000	0.000	32	220	9127	8950	0.210	Error	Error	4895	4232	0	0	4759	4191	0	0	0	0
1	21	1	""	"YCR026C"	5410	25540	60	2361	3051	2391	120	144	112	100	100	0	1218	1633	1405	74	99	91	93	93	0	0	0	0	0	0	0	0	0	0	0	0	0	0	0	0	0	0	0	1.959	1.880	2.114	2.059	1.528	1.813	0.909	0.000	0.000	0.000	0.000	0.000	0.000	0.000	0.000	0.000	0.000	0.000	0.000	0.000	0.000	32	148	3385	4490	0.970	Error	Error	2241	1144	0	0	2931	1559	0	0	0	0
1	1	2	"LRE1"	"YCL051W"	1420	25750	60	231	291	260	115	125	58	84	46	0	194	311	525	72	88	48	93	65	0	0	0	0	0	0	0	0	0	0	0	0	0	0	0	0	0	0	0	0.951	0.736	0.896	0.914	2.387	0.413	0.396	0.000	0.000	0.000	0.000	0.000	0.000	0.000	0.000	0.000	0.000	0.000	0.000	0.000	0.000	32	170	238	415	-0.073	Error	Error	116	122	0	0	176	239	0	0	0	0
1	2	2	""	"YCLX10C"	1610	25750	70	3421	3379	875	113	184	400	100	100	0	13897	14130	3796	77	414	1848	100	100	0	0	0	0	0	0	0	0	0	0	0	0	0	0	0	0	0	0	0	0.239	0.232	0.239	0.231	1.295	0.229	0.896	0.000	0.000	0.000	0.000	0.000	0.000	0.000	0.000	0.000	0.000	0.000	0.000	0.000	0.000	32	236	17128	17319	-2.063	Error	Error	3308	13820	0	0	3266	14053	0	0	0	0
1	3	2	"FEN2"	"YCR028C"	1820	25750	70	13259	12977	2342	124	199	641	100	100	0	10181	10210	1455	87	118	324	100	100	0	0	0	0	0	0	0	0	0	0	0	0	0	0	0	0	0	0	0	1.301	1.270	1.273	1.262	1.152	1.218	0.930	0.000	0.000	0.000	0.000	0.000	0.000	0.000	0.000	0.000	0.000	0.000	0.000	0.000	0.000	32	236	23229	22976	0.380	Error	Error	13135	10094	0	0	12853	10123	0	0	0	0
1	4	2	"SHR3"	"YDL212W"	2020	25750	80	332	1011	1544	124	132	62	84	75	0	296	789	1081	77	88	41	98	88	0	0	0	0	0	0	0	0	0	0	0	0	0	0	0	0	0	0	0	0.950	1.246	0.915	0.897	2.606	1.432	0.831	0.000	0.000	0.000	0.000	0.000	0.000	0.000	0.000	0.000	0.000	0.000	0.000	0.000	0.000	52	340	427	1599	-0.074	Error	Error	208	219	0	0	887	712	0	0	0	0
1	5	2	"THI13"	"YDL244W"	2220	25760	100	2880	4776	4834	121	136	115	100	100	0	4014	5929	5533	76	91	91	100	100	0	0	0	0	0	0	0	0	0	0	0	0	0	0	0	0	0	0	0	0.701	0.795	0.728	0.789	1.663	0.825	0.868	0.000	0.000	0.000	0.000	0.000	0.000	0.000	0.000	0.000	0.000	0.000	0.000	0.000	0.000	80	548	6697	10508	-0.513	Error	Error	2759	3938	0	0	4655	5853	0	0	0	0
1	6	2	"REG1"	"YDR028C"	2420	25760	90	1760	2111	1530	117	125	64	98	96	0	1100	1323	1010	71	81	42	100	100	0	0	0	0	0	0	0	0	0	0	0	0	0	0	0	0	0	0	0	1.597	1.593	1.549	1.625	1.934	1.622	0.857	0.000	0.000	0.000	0.000	0.000	0.000	0.000	0.000	0.000	0.000	0.000	0.000	0.000	0.000	52	420	2672	3246	0.675	Error	Error	1643	1029	0	0	1994	1252	0	0	0	0
1	7	2	""	"YDL214C"	2620	25760	60	280	329	178	111	124	70	78	53	0	291	312	197	74	90	68	81	65	0	0	0	0	0	0	0	0	0	0	0	0	0	0	0	0	0	0	0	0.779	0.916	0.940	1.080	3.308	0.919	0.518	0.000	0.000	0.000	0.000	0.000	0.000	0.000	0.000	0.000	0.000	0.000	0.000	0.000	0.000	32	176	386	456	-0.361	Error	Error	169	217	0	0	218	238	0	0	0	0
1	8	2	""	"YDL246C"	2810	25780	50	192	226	81	107	130	80	75	33	0	171	193	103	70	85	43	91	58	0	0	0	0	0	0	0	0	0	0	0	0	0	0	0	0	0	0	0	0.842	0.967	1.115	0.986	3.504	0.703	0.259	0.000	0.000	0.000	0.000	0.000	0.000	0.000	0.000	0.000	0.000	0.000	0.000	0.000	0.000	12	104	186	242	-0.249	Error	Error	85	101	0	0	119	123	0	0	0	0
1	9	2	"RAD28"	"YDR030C"	3000	25780	60	1130	2439	3116	131	137	71	100	96	0	391	815	965	82	93	43	87	78	0	0	0	0	0	0	0	0	0	0	0	0	0	0	0	0	0	0	0	3.233	3.149	3.284	3.161	2.057	3.433	0.856	0.000	0.000	0.000	0.000	0.000	0.000	0.000	0.000	0.000	0.000	0.000	0.000	0.000	0.000	32	176	1308	3041	1.693	Error	Error	999	309	0	0	2308	733	0	0	0	0
1	10	2	""	"YDL216C"	3190	25780	60	1219	2907	3080	116	142	120	100	93	0	1104	2397	2883	79	118	156	93	84	0	0	0	0	0	0	0	0	0	0	0	0	0	0	0	0	0	0	0	1.076	1.204	1.210	1.269	1.729	1.095	0.863	0.000	0.000	0.000	0.000	0.000	0.000	0.000	0.000	0.000	0.000	0.000	0.000	0.000	0.000	32	176	2128	5109	0.106	Error	Error	1103	1025	0	0	2791	2318	0	0	0	0
1	11	2	"COS7"	"YDL248W"	3410	25770	60	1744	3158	3556	120	142	96	93	93	0	1813	2954	3348	85	115	133	100	93	0	0	0	0	0	0	0	0	0	0	0	0	0	0	0	0	0	0	0	0.940	1.059	0.911	0.908	1.796	1.056	0.892	0.000	0.000	0.000	0.000	0.000	0.000	0.000	0.000	0.000	0.000	0.000	0.000	0.000	0.000	32	176	3352	5907	-0.090	Error	Error	1624	1728	0	0	3038	2869	0	0	0	0
1	12	2	""	"YDR032C"	3610	25760	70	2159	2840	2256	123	139	110	100	100	0	921	1354	993	79	104	101	96	96	0	0	0	0	0	0	0	0	0	0	0	0	0	0	0	0	0	0	0	2.418	2.131	2.104	2.061	1.730	2.255	0.892	0.000	0.000	0.000	0.000	0.000	0.000	0.000	0.000	0.000	0.000	0.000	0.000	0.000	0.000	32	236	2878	3992	1.274	Error	Error	2036	842	0	0	2717	1275	0	0	0	0
1	13	2	""	"YDL218W"	3810	25760	70	9344	8871	2863	121	297	1111	100	93	0	10550	9620	2702	87	368	1458	100	93	0	0	0	0	0	0	0	0	0	0	0	0	0	0	0	0	0	0	0	0.881	0.918	0.890	0.894	1.414	0.871	0.902	0.000	0.000	0.000	0.000	0.000	0.000	0.000	0.000	0.000	0.000	0.000	0.000	0.000	0.000	32	236	19686	18283	-0.182	Error	Error	9223	10463	0	0	8750	9533	0	0	0	0
1	14	2	"YRB1"	"YDR002W"	4020	25760	90	3009	2916	628	106	116	58	100	100	0	4113	4000	1019	76	84	36	100	100	0	0	0	0	0	0	0	0	0	0	0	0	0	0	0	0	0	0	0	0.719	0.716	0.724	0.741	1.423	0.680	0.877	0.000	0.000	0.000	0.000	0.000	0.000	0.000	0.000	0.000	0.000	0.000	0.000	0.000	0.000	52	420	6940	6734	-0.476	Error	Error	2903	4037	0	0	2810	3924	0	0	0	0
1	15	2	"LYS14"	"YDR034C"	4220	25770	60	5580	6055	3525	117	163	277	100	100	0	4531	6485	4424	82	171	507	100	100	0	0	0	0	0	0	0	0	0	0	0	0	0	0	0	0	0	0	0	1.228	0.927	1.032	0.952	1.502	0.853	0.856	0.000	0.000	0.000	0.000	0.000	0.000	0.000	0.000	0.000	0.000	0.000	0.000	0.000	0.000	32	176	9912	12341	0.296	Error	Error	5463	4449	0	0	5938	6403	0	0	0	0
1	16	2	"MRP1"	"YDR347W"	4420	25770	100	7569	7275	1466	108	129	134	100	100	0	7468	6973	2030	77	108	263	96	96	0	0	0	0	0	0	0	0	0	0	0	0	0	0	0	0	0	0	0	1.009	1.039	1.041	1.170	1.861	1.010	0.925	0.000	0.000	0.000	0.000	0.000	0.000	0.000	0.000	0.000	0.000	0.000	0.000	0.000	0.000	80	560	14852	14063	0.014	Error	Error	7461	7391	0	0	7167	6896	0	0	0	0
1	17	2	"RGA2"	"YDR379W"	4620	25770	70	17226	16286	4419	127	141	82	100	100	0	8447	8177	1401	79	90	43	100	100	0	0	0	0	0	0	0	0	0	0	0	0	0	0	0	0	0	0	0	2.043	1.995	2.020	1.920	1.272	2.129	0.934	0.000	0.000	0.000	0.000	0.000	0.000	0.000	0.000	0.000	0.000	0.000	0.000	0.000	0.000	32	236	25467	24257	1.031	Error	Error	17099	8368	0	0	16159	8098	0	0	0	0
1	18	2	""	"YDR411C"	4800	25790	80	13375	12597	2637	126	145	84	100	100	0	10221	9309	2427	80	101	151	100	100	0	0	0	0	0	0	0	0	0	0	0	0	0	0	0	0	0	0	0	1.306	1.351	1.330	1.384	1.304	1.325	0.942	0.000	0.000	0.000	0.000	0.000	0.000	0.000	0.000	0.000	0.000	0.000	0.000	0.000	0.000	52	340	23390	21700	0.386	Error	Error	13249	10141	0	0	12471	9229	0	0	0	0
1	19	2	"YPS7"	"YDR349C"	5010	25780	60	566	605	229	88	97	49	100	100	0	486	517	208	63	73	34	100	100	0	0	0	0	0	0	0	0	0	0	0	0	0	0	0	0	0	0	0	1.130	1.139	1.097	1.142	1.466	1.071	0.769	0.000	0.000	0.000	0.000	0.000	0.000	0.000	0.000	0.000	0.000	0.000	0.000	0.000	0.000	32	176	901	971	0.176	Error	Error	478	423	0	0	517	454	0	0	0	0
1	20	2	"YRA1"	"YDR381W"	5190	25780	70	2556	2588	488	112	183	407	100	100	0	1570	1509	243	64	120	260	100	100	0	0	0	0	0	0	0	0	0	0	0	0	0	0	0	0	0	0	0	1.623	1.713	1.609	1.707	1.279	1.810	0.879	0.000	0.000	0.000	0.000	0.000	0.000	0.000	0.000	0.000	0.000	0.000	0.000	0.000	0.000	32	236	3950	3921	0.699	Error	Error	2444	1506	0	0	2476	1445	0	0	0	0
1	21	2	""	"YDR413C"	5420	25760	80	5272	4942	1154	104	112	50	100	100	0	2885	2809	564	70	76	32	100	100	0	0	0	0	0	0	0	0	0	0	0	0	0	0	0	0	0	0	0	1.836	1.766	1.799	1.781	1.364	1.851	0.894	0.000	0.000	0.000	0.000	0.000	0.000	0.000	0.000	0.000	0.000	0.000	0.000	0.000	0.000	52	340	7983	7577	0.876	Error	Error	5168	2815	0	0	4838	2739	0	0	0	0
1	1	3	"SBE2"	"YDR351W"	1410	25970	80	14847	14118	4649	116	137	116	100	100	0	5377	5112	1592	75	88	54	100	98	0	0	0	0	0	0	0	0	0	0	0	0	0	0	0	0	0	0	0	2.778	2.780	2.805	2.916	1.513	2.864	0.915	0.000	0.000	0.000	0.000	0.000	0.000	0.000	0.000	0.000	0.000	0.000	0.000	0.000	0.000	52	320	20033	19039	1.474	Error	Error	14731	5302	0	0	14002	5037	0	0	0	0
1	2	3	""	"YDR383C"	1600	25990	80	6184	6214	1686	109	119	60	100	100	0	5700	5636	1311	75	83	38	100	100	0	0	0	0	0	0	0	0	0	0	0	0	0	0	0	0	0	0	0	1.080	1.098	1.067	1.105	1.320	1.098	0.925	0.000	0.000	0.000	0.000	0.000	0.000	0.000	0.000	0.000	0.000	0.000	0.000	0.000	0.000	52	340	11700	11666	0.111	Error	Error	6075	5625	0	0	6105	5561	0	0	0	0
1	3	3	""	"YDR415C"	1810	25980	70	12337	12294	2623	125	252	900	100	100	0	4787	4694	745	81	112	216	100	100	0	0	0	0	0	0	0	0	0	0	0	0	0	0	0	0	0	0	0	2.595	2.638	2.681	2.625	1.229	2.629	0.931	0.000	0.000	0.000	0.000	0.000	0.000	0.000	0.000	0.000	0.000	0.000	0.000	0.000	0.000	32	236	16918	16782	1.376	Error	Error	12212	4706	0	0	12169	4613	0	0	0	0
1	4	3	"TRR1"	"YDR353W"	2010	25970	80	7016	6882	2626	120	145	179	100	100	0	2652	2452	944	80	121	192	100	94	0	0	0	0	0	0	0	0	0	0	0	0	0	0	0	0	0	0	0	2.681	2.851	2.971	2.981	1.394	2.823	0.902	0.000	0.000	0.000	0.000	0.000	0.000	0.000	0.000	0.000	0.000	0.000	0.000	0.000	0.000	52	340	9468	9134	1.423	Error	Error	6896	2572	0	0	6762	2372	0	0	0	0
1	5	3	"EFT2"	"YDR385W"	2210	25960	70	20861	19913	3315	126	392	1628	100	100	0	7332	7241	1360	80	274	1048	100	100	0	0	0	0	0	0	0	0	0	0	0	0	0	0	0	0	0	0	0	2.859	2.763	2.847	2.793	1.229	2.723	0.909	0.000	0.000	0.000	0.000	0.000	0.000	0.000	0.000	0.000	0.000	0.000	0.000	0.000	0.000	32	236	27987	26948	1.516	Error	Error	20735	7252	0	0	19787	7161	0	0	0	0
1	6	3	""	"YDR417C"	2410	25960	70	3287	3294	445	119	197	449	100	100	0	1701	1741	341	76	136	291	100	100	0	0	0	0	0	0	0	0	0	0	0	0	0	0	0	0	0	0	0	1.950	1.907	2.001	1.935	1.264	1.929	0.871	0.000	0.000	0.000	0.000	0.000	0.000	0.000	0.000	0.000	0.000	0.000	0.000	0.000	0.000	32	236	4793	4840	0.963	Error	Error	3168	1625	0	0	3175	1665	0	0	0	0
1	7	3	""	"YER097W"	2600	25990	80	2601	2496	739	116	129	69	100	100	0	1967	1806	529	75	88	56	100	100	0	0	0	0	0	0	0	0	0	0	0	0	0	0	0	0	0	0	0	1.313	1.375	1.393	1.378	1.299	1.389	0.909	0.000	0.000	0.000	0.000	0.000	0.000	0.000	0.000	0.000	0.000	0.000	0.000	0.000	0.000	52	340	4377	4111	0.393	Error	Error	2485	1892	0	0	2380	1731	0	0	0	0
1	8	3	""	"YER128W"	2820	25970	80	6043	5936	739	120	130	75	100	100	0	3610	3648	634	86	95	45	100	100	0	0	0	0	0	0	0	0	0	0	0	0	0	0	0	0	0	0	0	1.681	1.633	1.619	1.661	1.317	1.645	0.905	0.000	0.000	0.000	0.000	0.000	0.000	0.000	0.000	0.000	0.000	0.000	0.000	0.000	0.000	52	340	9447	9378	0.749	Error	Error	5923	3524	0	0	5816	3562	0	0	0	0
1	9	3	""	"YER160C"	3010	25970	60	22496	22337	15424	128	154	148	100	100	0	10993	11828	8313	86	126	232	100	100	0	0	0	0	0	0	0	0	0	0	0	0	0	0	0	0	0	0	0	2.051	1.891	1.931	1.917	1.519	1.946	0.869	0.000	0.000	0.000	0.000	0.000	0.000	0.000	0.000	0.000	0.000	0.000	0.000	0.000	0.000	32	176	33275	33951	1.036	Error	Error	22368	10907	0	0	22209	11742	0	0	0	0
1	10	3	"PRS2"	"YER099C"	3220	25970	90	8979	8884	2139	113	128	74	100	100	0	8729	8659	1536	85	95	44	100	100	0	0	0	0	0	0	0	0	0	0	0	0	0	0	0	0	0	0	0	1.026	1.023	1.006	1.009	1.196	1.038	0.936	0.000	0.000	0.000	0.000	0.000	0.000	0.000	0.000	0.000	0.000	0.000	0.000	0.000	0.000	52	420	17510	17345	0.037	Error	Error	8866	8644	0	0	8771	8574	0	0	0	0
1	11	3	""	"YER130C"	3410	25970	70	7371	7473	2014	125	237	669	100	100	0	11075	10720	1696	94	389	1568	100	100	0	0	0	0	0	0	0	0	0	0	0	0	0	0	0	0	0	0	0	0.660	0.692	0.687	0.678	1.312	0.656	0.867	0.000	0.000	0.000	0.000	0.000	0.000	0.000	0.000	0.000	0.000	0.000	0.000	0.000	0.000	32	236	18227	17974	-0.600	Error	Error	7246	10981	0	0	7348	10626	0	0	0	0
1	12	3	"RAD4"	"YER162C"	3610	25970	60	18824	17118	5158	124	327	1242	100	100	0	6377	5707	1816	95	242	726	96	96	0	0	0	0	0	0	0	0	0	0	0	0	0	0	0	0	0	0	0	2.977	3.028	3.003	3.115	1.333	2.924	0.927	0.000	0.000	0.000	0.000	0.000	0.000	0.000	0.000	0.000	0.000	0.000	0.000	0.000	0.000	32	176	24982	22606	1.574	Error	Error	18700	6282	0	0	16994	5612	0	0	0	0
1	13	3	"AST2"	"YER101C"	3820	25980	90	7631	7365	1712	116	124	59	100	100	0	4852	4706	1058	81	90	40	100	100	0	0	0	0	0	0	0	0	0	0	0	0	0	0	0	0	0	0	0	1.575	1.567	1.576	1.575	1.403	1.562	0.885	0.000	0.000	0.000	0.000	0.000	0.000	0.000	0.000	0.000	0.000	0.000	0.000	0.000	0.000	52	420	12286	11874	0.655	Error	Error	7515	4771	0	0	7249	4625	0	0	0	0
1	14	3	"PMD1"	"YER132C"	4030	25970	70	11297	12052	5638	110	133	118	100	100	0	11754	11237	3607	78	85	37	100	100	0	0	0	0	0	0	0	0	0	0	0	0	0	0	0	0	0	0	0	0.958	1.070	1.005	0.973	1.366	1.151	0.925	0.000	0.000	0.000	0.000	0.000	0.000	0.000	0.000	0.000	0.000	0.000	0.000	0.000	0.000	32	236	22863	23101	-0.062	Error	Error	11187	11676	0	0	11942	11159	0	0	0	0
1	15	3	"CHD1"	"YER164W"	4230	25970	70	16401	17059	6950	103	118	82	100	100	0	6750	6406	2156	73	83	44	100	100	0	0	0	0	0	0	0	0	0	0	0	0	0	0	0	0	0	0	0	2.441	2.677	2.607	2.588	1.272	2.793	0.943	0.000	0.000	0.000	0.000	0.000	0.000	0.000	0.000	0.000	0.000	0.000	0.000	0.000	0.000	32	236	22975	23289	1.287	Error	Error	16298	6677	0	0	16956	6333	0	0	0	0
1	16	3	"SSA4"	"YER103W"	4420	25970	70	13103	12751	2983	110	226	751	100	100	0	9890	9268	1904	79	239	954	100	96	0	0	0	0	0	0	0	0	0	0	0	0	0	0	0	0	0	0	0	1.324	1.376	1.384	1.386	1.281	1.331	0.924	0.000	0.000	0.000	0.000	0.000	0.000	0.000	0.000	0.000	0.000	0.000	0.000	0.000	0.000	32	236	22804	21830	0.405	Error	Error	12993	9811	0	0	12641	9189	0	0	0	0
1	17	3	""	"YER134C"	4630	25970	90	3844	3680	795	114	125	63	100	100	0	2126	2071	438	80	90	41	100	100	0	0	0	0	0	0	0	0	0	0	0	0	0	0	0	0	0	0	0	1.823	1.791	1.755	1.808	1.286	1.871	0.903	0.000	0.000	0.000	0.000	0.000	0.000	0.000	0.000	0.000	0.000	0.000	0.000	0.000	0.000	52	420	5776	5557	0.866	Error	Error	3730	2046	0	0	3566	1991	0	0	0	0
1	18	3	""	"YER166W"	4840	25970	60	315	357	149	155	184	124	59	25	0	338	324	125	87	105	55	90	84	0	0	0	0	0	0	0	0	0	0	0	0	0	0	0	0	0	0	0	0.637	0.852	0.800	0.824	2.649	1.089	0.477	0.000	0.000	0.000	0.000	0.000	0.000	0.000	0.000	0.000	0.000	0.000	0.000	0.000	0.000	32	176	411	439	-0.650	Error	Error	160	251	0	0	202	237	0	0	0	0
1	19	3	"AMS1"	"YGL156W"	5040	25970	60	8232	8889	4943	109	208	616	100	100	0	4815	5016	2623	68	92	145	100	100	0	0	0	0	0	0	0	0	0	0	0	0	0	0	0	0	0	0	0	1.711	1.774	1.716	1.798	1.552	2.057	0.825	0.000	0.000	0.000	0.000	0.000	0.000	0.000	0.000	0.000	0.000	0.000	0.000	0.000	0.000	32	176	12870	13728	0.775	Error	Error	8123	4747	0	0	8780	4948	0	0	0	0
1	20	3	""	"YGL188C"	5220	25970	60	787	742	262	102	118	92	96	90	0	426	393	121	64	74	49	93	87	0	0	0	0	0	0	0	0	0	0	0	0	0	0	0	0	0	0	0	1.892	1.945	1.946	1.963	1.629	2.311	0.784	0.000	0.000	0.000	0.000	0.000	0.000	0.000	0.000	0.000	0.000	0.000	0.000	0.000	0.000	32	176	1047	969	0.920	Error	Error	685	362	0	0	640	329	0	0	0	0
1	21	3	""	"YGL220W"	5420	25960	70	5313	5101	868	110	175	429	100	100	0	2171	2015	580	73	122	271	96	96	0	0	0	0	0	0	0	0	0	0	0	0	0	0	0	0	0	0	0	2.480	2.570	2.493	2.859	1.817	2.579	0.894	0.000	0.000	0.000	0.000	0.000	0.000	0.000	0.000	0.000	0.000	0.000	0.000	0.000	0.000	32	236	7301	6933	1.310	Error	Error	5203	2098	0	0	4991	1942	0	0	0	0
1	1	4	"RCK1"	"YGL158W"	1440	26170	70	12471	11905	3050	124	418	1577	100	96	0	10881	10111	2473	83	266	1174	100	100	0	0	0	0	0	0	0	0	0	0	0	0	0	0	0	0	0	0	0	1.143	1.175	1.179	1.161	1.213	1.145	0.914	0.000	0.000	0.000	0.000	0.000	0.000	0.000	0.000	0.000	0.000	0.000	0.000	0.000	0.000	32	236	23145	21809	0.193	Error	Error	12347	10798	0	0	11781	10028	0	0	0	0
1	2	4	"CDC55"	"YGL190C"	1610	26180	60	6869	6751	2423	126	263	747	100	100	0	6904	6473	2998	78	309	1086	96	90	0	0	0	0	0	0	0	0	0	0	0	0	0	0	0	0	0	0	0	0.988	1.036	0.994	1.123	1.431	0.931	0.909	0.000	0.000	0.000	0.000	0.000	0.000	0.000	0.000	0.000	0.000	0.000	0.000	0.000	0.000	32	176	13569	13020	-0.018	Error	Error	6743	6826	0	0	6625	6395	0	0	0	0
1	3	4	""	"YGL222C"	1830	26180	70	5987	5801	847	122	196	448	100	100	0	3554	3498	500	85	104	128	100	100	0	0	0	0	0	0	0	0	0	0	0	0	0	0	0	0	0	0	0	1.691	1.664	1.644	1.662	1.175	1.652	0.896	0.000	0.000	0.000	0.000	0.000	0.000	0.000	0.000	0.000	0.000	0.000	0.000	0.000	0.000	32	236	9334	9092	0.758	Error	Error	5865	3469	0	0	5679	3413	0	0	0	0
1	4	4	""	"YGL160W"	2030	26180	80	9990	9953	2467	119	133	111	100	100	0	4590	4196	1234	87	106	91	100	100	0	0	0	0	0	0	0	0	0	0	0	0	0	0	0	0	0	0	0	2.192	2.393	2.357	2.539	1.473	2.341	0.899	0.000	0.000	0.000	0.000	0.000	0.000	0.000	0.000	0.000	0.000	0.000	0.000	0.000	0.000	52	340	14374	13943	1.132	Error	Error	9871	4503	0	0	9834	4109	0	0	0	0
1	5	4	"IME4"	"YGL192W"	2220	26180	80	10953	10692	3088	113	127	108	100	100	0	6657	6374	1721	74	87	65	100	98	0	0	0	0	0	0	0	0	0	0	0	0	0	0	0	0	0	0	0	1.647	1.679	1.688	1.784	1.560	1.702	0.906	0.000	0.000	0.000	0.000	0.000	0.000	0.000	0.000	0.000	0.000	0.000	0.000	0.000	0.000	52	340	17423	16879	0.720	Error	Error	10840	6583	0	0	10579	6300	0	0	0	0
1	6	4	""	"YGL224C"	2420	26180	90	5031	5143	2093	113	125	67	100	100	0	10815	10254	3766	79	93	56	100	100	0	0	0	0	0	0	0	0	0	0	0	0	0	0	0	0	0	0	0	0.458	0.494	0.477	0.525	1.738	0.463	0.882	0.000	0.000	0.000	0.000	0.000	0.000	0.000	0.000	0.000	0.000	0.000	0.000	0.000	0.000	52	420	15654	15205	-1.126	Error	Error	4918	10736	0	0	5030	10175	0	0	0	0
1	7	4	"SUT1"	"YGL162W"	2640	26180	70	8755	8681	1379	126	267	844	100	100	0	5362	5204	810	83	112	172	100	100	0	0	0	0	0	0	0	0	0	0	0	0	0	0	0	0	0	0	0	1.635	1.671	1.655	1.673	1.218	1.708	0.921	0.000	0.000	0.000	0.000	0.000	0.000	0.000	0.000	0.000	0.000	0.000	0.000	0.000	0.000	32	236	13908	13676	0.709	Error	Error	8629	5279	0	0	8555	5121	0	0	0	0
1	8	4	"HOS2"	"YGL194C"	2830	26180	80	6890	7182	2896	118	128	59	100	100	0	11614	11344	3305	86	98	47	100	100	0	0	0	0	0	0	0	0	0	0	0	0	0	0	0	0	0	0	0	0.587	0.627	0.597	0.599	1.527	0.622	0.883	0.000	0.000	0.000	0.000	0.000	0.000	0.000	0.000	0.000	0.000	0.000	0.000	0.000	0.000	52	340	18300	18322	-0.767	Error	Error	6772	11528	0	0	7064	11258	0	0	0	0
1	9	4	""	"YGL226W"	3020	26180	70	6242	5976	1141	120	279	903	100	100	0	6018	5868	1415	83	287	969	100	96	0	0	0	0	0	0	0	0	0	0	0	0	0	0	0	0	0	0	0	1.032	1.012	1.013	1.032	1.328	1.007	0.914	0.000	0.000	0.000	0.000	0.000	0.000	0.000	0.000	0.000	0.000	0.000	0.000	0.000	0.000	32	236	12057	11641	0.045	Error	Error	6122	5935	0	0	5856	5785	0	0	0	0
1	10	4	""	"YGR277C"	3220	26180	80	8292	7910	1486	106	122	78	100	100	0	3247	3072	707	82	100	122	100	100	0	0	0	0	0	0	0	0	0	0	0	0	0	0	0	0	0	0	0	2.586	2.610	2.540	2.677	1.422	2.655	0.903	0.000	0.000	0.000	0.000	0.000	0.000	0.000	0.000	0.000	0.000	0.000	0.000	0.000	0.000	52	340	11351	10794	1.371	Error	Error	8186	3165	0	0	7804	2990	0	0	0	0
1	11	4	""	"YHL013C"	3430	26170	70	6869	6636	1162	114	175	298	100	100	0	16230	15159	3833	110	355	1591	100	96	0	0	0	0	0	0	0	0	0	0	0	0	0	0	0	0	0	0	0	0.419	0.433	0.423	0.451	1.342	0.380	0.895	0.000	0.000	0.000	0.000	0.000	0.000	0.000	0.000	0.000	0.000	0.000	0.000	0.000	0.000	32	236	22875	21571	-1.255	Error	Error	6755	16120	0	0	6522	15049	0	0	0	0
1	12	4	""	"YHL045W"	3640	26170	80	7236	6671	1810	114	126	69	100	100	0	6973	6775	1800	87	104	94	100	100	0	0	0	0	0	0	0	0	0	0	0	0	0	0	0	0	0	0	0	1.034	0.980	0.998	0.993	1.380	0.982	0.897	0.000	0.000	0.000	0.000	0.000	0.000	0.000	0.000	0.000	0.000	0.000	0.000	0.000	0.000	52	340	14008	13245	0.049	Error	Error	7122	6886	0	0	6557	6688	0	0	0	0
1	13	4	"SCW4"	"YGR279C"	3830	26180	80	7959	7683	1880	113	124	65	100	100	0	3609	3382	931	80	89	39	100	100	0	0	0	0	0	0	0	0	0	0	0	0	0	0	0	0	0	0	0	2.223	2.293	2.246	2.386	1.529	2.325	0.919	0.000	0.000	0.000	0.000	0.000	0.000	0.000	0.000	0.000	0.000	0.000	0.000	0.000	0.000	52	340	11375	10872	1.153	Error	Error	7846	3529	0	0	7570	3302	0	0	0	0
1	14	4	"RPS20"	"YHL015W"	4030	26180	80	1799	1725	516	107	117	79	100	100	0	2510	2413	701	72	86	83	100	98	0	0	0	0	0	0	0	0	0	0	0	0	0	0	0	0	0	0	0	0.694	0.691	0.680	0.700	1.378	0.679	0.850	0.000	0.000	0.000	0.000	0.000	0.000	0.000	0.000	0.000	0.000	0.000	0.000	0.000	0.000	52	340	4130	3959	-0.527	Error	Error	1692	2438	0	0	1618	2341	0	0	0	0
1	15	4	""	"YHL047C"	4230	26170	70	17930	17783	3828	109	151	242	100	100	0	17735	16982	3093	76	209	972	100	100	0	0	0	0	0	0	0	0	0	0	0	0	0	0	0	0	0	0	0	1.009	1.045	1.078	1.051	1.303	1.008	0.914	0.000	0.000	0.000	0.000	0.000	0.000	0.000	0.000	0.000	0.000	0.000	0.000	0.000	0.000	32	236	35480	34580	0.013	Error	Error	17821	17659	0	0	17674	16906	0	0	0	0
1	16	4	"YOR1"	"YGR281W"	4430	26170	70	12237	11815	3933	106	124	114	100	100	0	12301	12007	3726	76	106	215	100	100	0	0	0	0	0	0	0	0	0	0	0	0	0	0	0	0	0	0	0	0.992	0.981	0.999	0.979	1.301	0.977	0.880	0.000	0.000	0.000	0.000	0.000	0.000	0.000	0.000	0.000	0.000	0.000	0.000	0.000	0.000	32	236	24356	23640	-0.011	Error	Error	12131	12225	0	0	11709	11931	0	0	0	0
1	17	4	""	"YHL017W"	4640	26180	80	8456	8219	1188	107	113	52	100	100	0	15811	15247	3095	80	92	70	100	100	0	0	0	0	0	0	0	0	0	0	0	0	0	0	0	0	0	0	0	0.531	0.535	0.519	0.547	1.339	0.513	0.918	0.000	0.000	0.000	0.000	0.000	0.000	0.000	0.000	0.000	0.000	0.000	0.000	0.000	0.000	52	340	24080	23279	-0.914	Error	Error	8349	15731	0	0	8112	15167	0	0	0	0
1	18	4	""	"YHL049C"	4820	26170	90	33855	30642	11855	141	238	945	100	100	0	10960	9641	3966	94	177	702	100	94	0	0	0	0	0	0	0	0	0	0	0	0	0	0	0	0	0	0	0	3.103	3.195	2.992	3.375	1.634	3.235	0.885	0.000	0.000	0.000	0.000	0.000	0.000	0.000	0.000	0.000	0.000	0.000	0.000	0.000	0.000	52	414	44580	40048	1.634	Error	Error	33714	10866	0	0	30501	9547	0	0	0	0
1	19	4	""	"YGR283C"	5030	26180	100	6531	6033	2230	113	182	817	98	95	0	3581	3148	1420	74	135	605	87	85	0	0	0	0	0	0	0	0	0	0	0	0	0	0	0	0	0	0	0	1.830	1.926	1.879	2.242	2.072	1.884	0.902	0.000	0.000	0.000	0.000	0.000	0.000	0.000	0.000	0.000	0.000	0.000	0.000	0.000	0.000	80	556	9925	8994	0.872	Error	Error	6418	3507	0	0	5920	3074	0	0	0	0
1	20	4	"APM2"	"YHL019C"	5240	26170	80	11167	10103	3186	100	117	84	100	100	0	6851	6464	1764	70	116	242	98	96	0	0	0	0	0	0	0	0	0	0	0	0	0	0	0	0	0	0	0	1.632	1.564	1.606	1.593	1.660	1.625	0.896	0.000	0.000	0.000	0.000	0.000	0.000	0.000	0.000	0.000	0.000	0.000	0.000	0.000	0.000	52	340	17848	16397	0.707	Error	Error	11067	6781	0	0	10003	6394	0	0	0	0
1	21	4	""	"YHR001W"	5440	26170	80	4323	3884	1271	103	121	85	98	98	0	19347	18069	5944	75	122	244	96	96	0	0	0	0	0	0	0	0	0	0	0	0	0	0	0	0	0	0	0	0.219	0.210	0.212	0.227	1.724	0.198	0.889	0.000	0.000	0.000	0.000	0.000	0.000	0.000	0.000	0.000	0.000	0.000	0.000	0.000	0.000	52	340	23492	21775	-2.191	Error	Error	4220	19272	0	0	3781	17994	0	0	0	0
1	1	5	""	"YIL087C"	1430	26380	80	6090	5742	1371	116	128	67	100	100	0	3568	3514	783	77	85	41	100	100	0	0	0	0	0	0	0	0	0	0	0	0	0	0	0	0	0	0	0	1.711	1.637	1.693	1.651	1.322	1.684	0.901	0.000	0.000	0.000	0.000	0.000	0.000	0.000	0.000	0.000	0.000	0.000	0.000	0.000	0.000	52	332	9465	9063	0.775	Error	Error	5974	3491	0	0	5626	3437	0	0	0	0
1	2	5	"RPI1"	"YIL119C"	1630	26380	80	5575	5261	1954	111	127	93	98	98	0	3161	2904	847	74	84	51	100	98	0	0	0	0	0	0	0	0	0	0	0	0	0	0	0	0	0	0	0	1.770	1.820	1.768	1.792	1.529	1.920	0.892	0.000	0.000	0.000	0.000	0.000	0.000	0.000	0.000	0.000	0.000	0.000	0.000	0.000	0.000	52	340	8551	7980	0.824	Error	Error	5464	3087	0	0	5150	2830	0	0	0	0
1	3	5	""	"YIL151C"	1840	26380	60	713	788	434	111	126	61	100	96	0	831	885	506	78	88	39	100	100	0	0	0	0	0	0	0	0	0	0	0	0	0	0	0	0	0	0	0	0.799	0.839	0.967	0.843	1.807	0.750	0.698	0.000	0.000	0.000	0.000	0.000	0.000	0.000	0.000	0.000	0.000	0.000	0.000	0.000	0.000	32	176	1355	1484	-0.323	Error	Error	602	753	0	0	677	807	0	0	0	0
1	4	5	""	"YIL089W"	2040	26380	90	3698	3518	611	115	127	67	100	100	0	4551	4523	671	85	93	43	100	100	0	0	0	0	0	0	0	0	0	0	0	0	0	0	0	0	0	0	0	0.802	0.767	0.784	0.760	1.269	0.752	0.889	0.000	0.000	0.000	0.000	0.000	0.000	0.000	0.000	0.000	0.000	0.000	0.000	0.000	0.000	52	420	8049	7841	-0.318	Error	Error	3583	4466	0	0	3403	4438	0	0	0	0
1	5	5	""	"YIL121W"	2220	26380	60	7034	6854	1114	121	252	741	100	100	0	16786	16546	2023	89	620	2633	100	100	0	0	0	0	0	0	0	0	0	0	0	0	0	0	0	0	0	0	0	0.414	0.409	0.411	0.406	1.249	0.386	0.895	0.000	0.000	0.000	0.000	0.000	0.000	0.000	0.000	0.000	0.000	0.000	0.000	0.000	0.000	32	176	23610	23190	-1.272	Error	Error	6913	16697	0	0	6733	16457	0	0	0	0
1	6	5	"RRD1"	"YIL153W"	2430	26380	80	4957	4752	1554	111	123	71	100	100	0	6581	6246	1603	77	86	37	100	100	0	0	0	0	0	0	0	0	0	0	0	0	0	0	0	0	0	0	0	0.745	0.752	0.745	0.734	1.433	0.753	0.892	0.000	0.000	0.000	0.000	0.000	0.000	0.000	0.000	0.000	0.000	0.000	0.000	0.000	0.000	52	340	11350	10810	-0.425	Error	Error	4846	6504	0	0	4641	6169	0	0	0	0
1	7	5	""	"YIL091C"	2630	26380	60	13309	13214	1870	113	132	94	100	100	0	14097	13896	1248	87	125	234	100	100	0	0	0	0	0	0	0	0	0	0	0	0	0	0	0	0	0	0	0	0.942	0.949	0.936	0.943	1.152	0.920	0.929	0.000	0.000	0.000	0.000	0.000	0.000	0.000	0.000	0.000	0.000	0.000	0.000	0.000	0.000	32	176	27206	26910	-0.086	Error	Error	13196	14010	0	0	13101	13809	0	0	0	0
1	8	5	"SIM1"	"YIL123W"	2850	26370	70	10819	10590	1421	114	335	1291	100	100	0	3885	3949	519	83	141	381	100	100	0	0	0	0	0	0	0	0	0	0	0	0	0	0	0	0	0	0	0	2.816	2.710	2.808	2.705	1.214	2.682	0.886	0.000	0.000	0.000	0.000	0.000	0.000	0.000	0.000	0.000	0.000	0.000	0.000	0.000	0.000	32	236	14507	14342	1.493	Error	Error	10705	3802	0	0	10476	3866	0	0	0	0
1	9	5	"GUT2"	"YIL155C"	3020	26380	60	6104	5900	948	120	268	773	100	100	0	11956	11224	2377	86	540	2034	100	100	0	0	0	0	0	0	0	0	0	0	0	0	0	0	0	0	0	0	0	0.504	0.519	0.531	0.527	1.257	0.489	0.916	0.000	0.000	0.000	0.000	0.000	0.000	0.000	0.000	0.000	0.000	0.000	0.000	0.000	0.000	32	176	17854	16918	-0.988	Error	Error	5984	11870	0	0	5780	11138	0	0	0	0
1	10	5	""	"YIL093C"	3250	26380	70	5696	5610	1845	106	288	931	100	93	0	5254	5113	1455	79	176	592	100	96	0	0	0	0	0	0	0	0	0	0	0	0	0	0	0	0	0	0	0	1.080	1.093	1.123	1.078	1.358	1.130	0.896	0.000	0.000	0.000	0.000	0.000	0.000	0.000	0.000	0.000	0.000	0.000	0.000	0.000	0.000	32	236	10765	10538	0.111	Error	Error	5590	5175	0	0	5504	5034	0	0	0	0
1	11	5	"KGD1"	"YIL125W"	3440	26380	70	14702	13999	3683	113	129	92	100	100	0	5080	4936	766	75	86	43	100	100	0	0	0	0	0	0	0	0	0	0	0	0	0	0	0	0	0	0	0	2.915	2.857	2.872	2.775	1.304	2.998	0.918	0.000	0.000	0.000	0.000	0.000	0.000	0.000	0.000	0.000	0.000	0.000	0.000	0.000	0.000	32	236	19594	18747	1.543	Error	Error	14589	5005	0	0	13886	4861	0	0	0	0
1	12	5	""	"YIL157C"	3630	26370	70	6623	6312	916	119	237	792	100	100	0	7116	6955	1373	84	273	1071	100	96	0	0	0	0	0	0	0	0	0	0	0	0	0	0	0	0	0	0	0	0.925	0.901	0.923	0.917	1.283	0.883	0.908	0.000	0.000	0.000	0.000	0.000	0.000	0.000	0.000	0.000	0.000	0.000	0.000	0.000	0.000	32	236	13536	13064	-0.113	Error	Error	6504	7032	0	0	6193	6871	0	0	0	0
1	13	5	""	"YJR026W"	3840	26370	60	9932	29220	27228	119	128	65	100	100	21	4367	12919	14691	78	85	37	100	100	0	0	0	0	0	0	0	0	0	0	0	0	0	0	0	0	0	0	0	2.288	2.266	1.778	2.271	1.821	2.151	0.802	0.000	0.000	0.000	0.000	0.000	0.000	0.000	0.000	0.000	0.000	0.000	0.000	0.000	0.000	32	176	14102	41942	1.194	Error	Error	9813	4289	0	0	29101	12841	0	0	0	0
1	14	5	"APS2"	"YJR058C"	4060	26370	60	5398	4839	2962	123	252	553	96	87	0	2180	1888	881	77	120	197	100	90	0	0	0	0	0	0	0	0	0	0	0	0	0	0	0	0	0	0	0	2.508	2.604	2.450	2.296	1.462	2.970	0.928	0.000	0.000	0.000	0.000	0.000	0.000	0.000	0.000	0.000	0.000	0.000	0.000	0.000	0.000	32	176	7378	6527	1.327	Error	Error	5275	2103	0	0	4716	1811	0	0	0	0
1	15	5	"JSN1"	"YJR091C"	4220	26370	50	1201	1365	860	116	166	160	100	91	0	394	635	528	83	120	111	100	66	0	0	0	0	0	0	0	0	0	0	0	0	0	0	0	0	0	0	0	3.489	2.263	2.611	2.579	1.670	1.887	0.877	0.000	0.000	0.000	0.000	0.000	0.000	0.000	0.000	0.000	0.000	0.000	0.000	0.000	0.000	12	104	1396	1801	1.803	Error	Error	1085	311	0	0	1249	552	0	0	0	0
1	16	5	""	"YJR028W"	4430	26380	60	6487	25140	27232	118	180	346	96	90	12	2292	9374	12901	70	157	525	87	75	0	0	0	0	0	0	0	0	0	0	0	0	0	0	0	0	0	0	0	2.866	2.689	1.918	2.648	2.416	2.620	0.705	0.000	0.000	0.000	0.000	0.000	0.000	0.000	0.000	0.000	0.000	0.000	0.000	0.000	0.000	32	176	8591	34326	1.519	Error	Error	6369	2222	0	0	25022	9304	0	0	0	0
1	17	5	"CBF1"	"YJR060W"	4620	26370	50	821	1472	1343	106	115	65	100	100	0	490	820	754	76	91	51	100	100	0	0	0	0	0	0	0	0	0	0	0	0	0	0	0	0	0	0	0	1.727	1.836	1.638	1.764	1.347	1.633	0.849	0.000	0.000	0.000	0.000	0.000	0.000	0.000	0.000	0.000	0.000	0.000	0.000	0.000	0.000	12	104	1129	2110	0.788	Error	Error	715	414	0	0	1366	744	0	0	0	0
1	18	5	"FIP1"	"YJR093C"	4850	26370	60	500	1421	2111	118	124	56	93	84	0	1168	2188	3153	78	86	38	100	100	0	0	0	0	0	0	0	0	0	0	0	0	0	0	0	0	0	0	0	0.350	0.618	0.499	0.508	2.001	0.639	0.857	0.000	0.000	0.000	0.000	0.000	0.000	0.000	0.000	0.000	0.000	0.000	0.000	0.000	0.000	32	176	1472	3413	-1.513	Error	Error	382	1090	0	0	1303	2110	0	0	0	0
1	19	5	""	"YJR030C"	5040	26370	60	744	2608	3507	97	111	60	100	96	0	759	2104	2679	72	86	52	100	93	0	0	0	0	0	0	0	0	0	0	0	0	0	0	0	0	0	0	0	0.942	1.236	1.204	1.221	2.004	1.311	0.862	0.000	0.000	0.000	0.000	0.000	0.000	0.000	0.000	0.000	0.000	0.000	0.000	0.000	0.000	32	176	1334	4543	-0.087	Error	Error	647	687	0	0	2511	2032	0	0	0	0
1	20	5	"NTA1"	"YJR062C"	5260	26370	70	516	2197	3006	101	119	86	96	90	0	720	2412	3289	67	87	98	100	78	0	0	0	0	0	0	0	0	0	0	0	0	0	0	0	0	0	0	0	0.636	0.894	0.893	0.821	2.355	0.909	0.843	0.000	0.000	0.000	0.000	0.000	0.000	0.000	0.000	0.000	0.000	0.000	0.000	0.000	0.000	32	236	1068	4441	-0.654	Error	Error	415	653	0	0	2096	2345	0	0	0	0
1	21	5	"RPL43B"	"YJR094W-A"	5420	26370	50	2732	4380	3426	115	558	1226	91	75	0	2521	3350	2740	79	711	1832	66	25	0	0	0	0	0	0	0	0	0	0	0	0	0	0	0	0	0	0	0	1.072	1.304	1.417	1.315	1.509	1.141	0.893	0.000	0.000	0.000	0.000	0.000	0.000	0.000	0.000	0.000	0.000	0.000	0.000	0.000	0.000	12	104	5059	7536	0.100	Error	Error	2617	2442	0	0	4265	3271	0	0	0	0
1	1	6	"CPR7"	"YJR032W"	1440	26580	80	1112	2071	2206	124	135	81	94	92	0	1206	2115	2135	76	83	35	98	98	0	0	0	0	0	0	0	0	0	0	0	0	0	0	0	0	0	0	0	0.874	0.955	0.972	0.902	1.702	1.002	0.902	0.000	0.000	0.000	0.000	0.000	0.000	0.000	0.000	0.000	0.000	0.000	0.000	0.000	0.000	52	340	2118	3986	-0.194	Error	Error	988	1130	0	0	1947	2039	0	0	0	0
1	2	6	"CCT5"	"YJR064W"	1620	26580	60	2486	4613	4832	110	149	211	100	96	0	3350	4727	4409	82	170	448	100	87	0	0	0	0	0	0	0	0	0	0	0	0	0	0	0	0	0	0	0	0.727	0.969	0.803	0.837	1.562	1.029	0.880	0.000	0.000	0.000	0.000	0.000	0.000	0.000	0.000	0.000	0.000	0.000	0.000	0.000	0.000	32	176	5644	9148	-0.460	Error	Error	2376	3268	0	0	4503	4645	0	0	0	0
1	3	6	""	"YJR096W"	1840	26570	70	6722	7620	4199	121	137	90	100	100	0	5130	5383	2694	77	101	105	100	100	0	0	0	0	0	0	0	0	0	0	0	0	0	0	0	0	0	0	0	1.306	1.413	1.345	1.366	1.289	1.443	0.927	0.000	0.000	0.000	0.000	0.000	0.000	0.000	0.000	0.000	0.000	0.000	0.000	0.000	0.000	32	236	11654	12805	0.386	Error	Error	6601	5053	0	0	7499	5306	0	0	0	0
1	4	6	""	"YKR021W"	2040	26580	90	2289	3888	3970	126	142	112	100	100	0	2792	4210	3792	84	96	54	100	100	0	0	0	0	0	0	0	0	0	0	0	0	0	0	0	0	0	0	0	0.799	0.912	0.817	0.817	1.455	0.982	0.919	0.000	0.000	0.000	0.000	0.000	0.000	0.000	0.000	0.000	0.000	0.000	0.000	0.000	0.000	52	420	4871	7888	-0.324	Error	Error	2163	2708	0	0	3762	4126	0	0	0	0
1	5	6	"YSR3"	"YKR053C"	2240	26580	60	813	2720	3200	136	163	161	100	90	0	1729	3467	3812	86	112	126	100	96	0	0	0	0	0	0	0	0	0	0	0	0	0	0	0	0	0	0	0	0.412	0.764	0.729	0.688	1.781	0.809	0.921	0.000	0.000	0.000	0.000	0.000	0.000	0.000	0.000	0.000	0.000	0.000	0.000	0.000	0.000	32	176	2320	5965	-1.279	Error	Error	677	1643	0	0	2584	3381	0	0	0	0
1	6	6	"MRPL20"	"YKR085C"	2450	26570	70	1270	2365	2319	123	130	67	100	100	0	1412	2390	2154	77	88	47	100	100	0	0	0	0	0	0	0	0	0	0	0	0	0	0	0	0	0	0	0	0.859	0.969	0.837	0.842	1.435	1.037	0.924	0.000	0.000	0.000	0.000	0.000	0.000	0.000	0.000	0.000	0.000	0.000	0.000	0.000	0.000	32	236	2482	4555	-0.219	Error	Error	1147	1335	0	0	2242	2313	0	0	0	0
1	7	6	""	"YKR023W"	2630	26580	70	7053	6967	2065	116	266	790	100	100	0	15727	14446	3625	93	525	2121	100	96	0	0	0	0	0	0	0	0	0	0	0	0	0	0	0	0	0	0	0	0.444	0.477	0.468	0.473	1.219	0.453	0.924	0.000	0.000	0.000	0.000	0.000	0.000	0.000	0.000	0.000	0.000	0.000	0.000	0.000	0.000	32	236	22571	21204	-1.172	Error	Error	6937	15634	0	0	6851	14353	0	0	0	0
1	8	6	"RHO4"	"YKR055W"	2840	26580	60	854	1440	1351	126	140	77	96	93	0	1026	1599	1541	87	98	48	100	100	0	0	0	0	0	0	0	0	0	0	0	0	0	0	0	0	0	0	0	0.775	0.869	0.786	0.770	1.879	0.867	0.872	0.000	0.000	0.000	0.000	0.000	0.000	0.000	0.000	0.000	0.000	0.000	0.000	0.000	0.000	32	176	1667	2826	-0.367	Error	Error	728	939	0	0	1314	1512	0	0	0	0
1	9	6	""	"YKR087C"	3050	26570	70	6041	6685	4007	116	138	133	100	100	0	11550	12539	6887	80	104	198	100	100	0	0	0	0	0	0	0	0	0	0	0	0	0	0	0	0	0	0	0	0.517	0.527	0.527	0.495	1.350	0.511	0.915	0.000	0.000	0.000	0.000	0.000	0.000	0.000	0.000	0.000	0.000	0.000	0.000	0.000	0.000	32	236	17395	19028	-0.953	Error	Error	5925	11470	0	0	6569	12459	0	0	0	0
1	10	6	"RPC37"	"YKR025W"	3230	26570	70	7226	7195	2905	111	163	277	100	100	0	4840	5372	2107	79	158	441	100	100	0	0	0	0	0	0	0	0	0	0	0	0	0	0	0	0	0	0	0	1.494	1.338	1.334	1.341	1.345	1.298	0.903	0.000	0.000	0.000	0.000	0.000	0.000	0.000	0.000	0.000	0.000	0.000	0.000	0.000	0.000	32	236	11876	12377	0.580	Error	Error	7115	4761	0	0	7084	5293	0	0	0	0
1	11	6	"RPS21A"	"YKR057W"	3430	26570	70	5335	6153	3657	113	143	155	100	100	0	1571	1605	746	77	103	127	100	100	0	0	0	0	0	0	0	0	0	0	0	0	0	0	0	0	0	0	0	3.495	3.953	3.831	3.672	1.407	4.311	0.888	0.000	0.000	0.000	0.000	0.000	0.000	0.000	0.000	0.000	0.000	0.000	0.000	0.000	0.000	32	236	6716	7568	1.805	Error	Error	5222	1494	0	0	6040	1528	0	0	0	0
1	12	6	""	"YKR089C"	3640	26570	70	694	1462	1530	118	125	62	93	93	0	877	1552	1453	74	84	40	100	100	0	0	0	0	0	0	0	0	0	0	0	0	0	0	0	0	0	0	0	0.717	0.909	0.767	0.715	1.858	0.994	0.879	0.000	0.000	0.000	0.000	0.000	0.000	0.000	0.000	0.000	0.000	0.000	0.000	0.000	0.000	32	236	1379	2822	-0.479	Error	Error	576	803	0	0	1344	1478	0	0	0	0
1	13	6	""	"YKR027W"	3840	26570	70	12216	11641	4836	116	253	884	100	100	0	4931	4862	2035	79	184	627	100	100	0	0	0	0	0	0	0	0	0	0	0	0	0	0	0	0	0	0	0	2.494	2.410	2.487	2.387	1.249	2.689	0.842	0.000	0.000	0.000	0.000	0.000	0.000	0.000	0.000	0.000	0.000	0.000	0.000	0.000	0.000	32	236	16952	16308	1.318	Error	Error	12100	4852	0	0	11525	4783	0	0	0	0
1	14	6	"TIF1"	"YKR059W"	4040	26570	60	3632	4801	4237	109	121	77	100	100	0	1683	2464	1979	73	102	139	96	90	0	0	0	0	0	0	0	0	0	0	0	0	0	0	0	0	0	0	0	2.188	1.962	1.854	1.780	1.661	2.128	0.835	0.000	0.000	0.000	0.000	0.000	0.000	0.000	0.000	0.000	0.000	0.000	0.000	0.000	0.000	32	176	5133	7083	1.130	Error	Error	3523	1610	0	0	4692	2391	0	0	0	0
1	15	6	"SRL3"	"YKR091W"	4220	26570	50	1500	3153	2894	132	344	894	91	41	0	2015	3182	3191	90	484	1246	66	25	0	0	0	0	0	0	0	0	0	0	0	0	0	0	0	0	0	0	0	0.711	0.977	0.934	1.022	1.659	0.888	0.882	0.000	0.000	0.000	0.000	0.000	0.000	0.000	0.000	0.000	0.000	0.000	0.000	0.000	0.000	12	104	3293	6113	-0.493	Error	Error	1368	1925	0	0	3021	3092	0	0	0	0
1	16	6	""	"YLR232W"	4450	26560	70	2077	2023	362	111	125	84	100	100	0	1344	1321	289	73	92	85	100	100	0	0	0	0	0	0	0	0	0	0	0	0	0	0	0	0	0	0	0	1.547	1.532	1.537	1.563	1.296	1.553	0.855	0.000	0.000	0.000	0.000	0.000	0.000	0.000	0.000	0.000	0.000	0.000	0.000	0.000	0.000	32	236	3237	3160	0.629	Error	Error	1966	1271	0	0	1912	1248	0	0	0	0
1	17	6	"RPS28B"	"YLR264W"	4640	26570	60	3541	3267	960	104	189	474	100	96	0	2876	2595	814	76	177	470	100	96	0	0	0	0	0	0	0	0	0	0	0	0	0	0	0	0	0	0	0	1.227	1.256	1.257	1.276	1.238	1.265	0.881	0.000	0.000	0.000	0.000	0.000	0.000	0.000	0.000	0.000	0.000	0.000	0.000	0.000	0.000	32	176	6237	5682	0.296	Error	Error	3437	2800	0	0	3163	2519	0	0	0	0
1	18	6	"ATP14"	"YLR295C"	4840	26570	70	4675	4382	1385	107	147	257	100	100	0	1496	1344	427	71	99	124	100	100	0	0	0	0	0	0	0	0	0	0	0	0	0	0	0	0	0	0	0	3.206	3.358	3.330	3.344	1.290	3.526	0.928	0.000	0.000	0.000	0.000	0.000	0.000	0.000	0.000	0.000	0.000	0.000	0.000	0.000	0.000	32	236	5993	5548	1.681	Error	Error	4568	1425	0	0	4275	1273	0	0	0	0
1	19	6	"TOP3"	"YLR234W"	5050	26570	80	6208	5672	1924	112	119	54	98	98	0	2381	2244	636	74	84	38	98	96	0	0	0	0	0	0	0	0	0	0	0	0	0	0	0	0	0	0	0	2.642	2.562	2.705	2.558	1.559	2.735	0.893	0.000	0.000	0.000	0.000	0.000	0.000	0.000	0.000	0.000	0.000	0.000	0.000	0.000	0.000	52	340	8403	7730	1.402	Error	Error	6096	2307	0	0	5560	2170	0	0	0	0
1	20	6	""	"YLR266C"	5260	26570	60	4711	5472	2933	108	123	96	100	100	0	4263	4455	2268	68	81	58	100	100	0	0	0	0	0	0	0	0	0	0	0	0	0	0	0	0	0	0	0	1.097	1.223	1.237	1.199	1.436	1.276	0.892	0.000	0.000	0.000	0.000	0.000	0.000	0.000	0.000	0.000	0.000	0.000	0.000	0.000	0.000	32	176	8798	9751	0.134	Error	Error	4603	4195	0	0	5364	4387	0	0	0	0
1	21	6	""	"YLR297W"	5460	26570	70	3760	3761	794	93	157	375	100	100	0	1511	1393	285	63	70	35	100	100	0	0	0	0	0	0	0	0	0	0	0	0	0	0	0	0	0	0	0	2.532	2.758	2.741	2.764	1.247	3.004	0.880	0.000	0.000	0.000	0.000	0.000	0.000	0.000	0.000	0.000	0.000	0.000	0.000	0.000	0.000	32	230	5115	4998	1.341	Error	Error	3667	1448	0	0	3668	1330	0	0	0	0
1	1	7	""	"YLR236C"	1450	26780	80	1600	1540	358	121	145	151	100	100	0	593	583	161	76	90	70	98	98	0	0	0	0	0	0	0	0	0	0	0	0	0	0	0	0	0	0	0	2.861	2.799	2.817	2.860	1.359	3.001	0.818	0.000	0.000	0.000	0.000	0.000	0.000	0.000	0.000	0.000	0.000	0.000	0.000	0.000	0.000	52	340	1996	1926	1.516	Error	Error	1479	517	0	0	1419	507	0	0	0	0
1	2	7	"SEC22"	"YLR268W"	1640	26790	80	6102	5801	1648	116	129	66	100	100	0	3264	3130	804	70	79	34	100	100	0	0	0	0	0	0	0	0	0	0	0	0	0	0	0	0	0	0	0	1.874	1.858	1.805	1.848	1.499	1.909	0.848	0.000	0.000	0.000	0.000	0.000	0.000	0.000	0.000	0.000	0.000	0.000	0.000	0.000	0.000	52	340	9180	8745	0.906	Error	Error	5986	3194	0	0	5685	3060	0	0	0	0
1	3	7	"ECM38"	"YLR299W"	1850	26780	70	16125	15852	1995	116	420	1714	100	100	0	4761	4686	525	77	135	340	100	100	0	0	0	0	0	0	0	0	0	0	0	0	0	0	0	0	0	0	0	3.418	3.414	3.377	3.404	1.212	3.479	0.918	0.000	0.000	0.000	0.000	0.000	0.000	0.000	0.000	0.000	0.000	0.000	0.000	0.000	0.000	32	236	20693	20345	1.773	Error	Error	16009	4684	0	0	15736	4609	0	0	0	0
1	4	7	""	"YLR238W"	2050	26780	100	9601	9332	1734	119	129	84	100	100	0	7153	7134	1241	86	97	67	100	100	0	0	0	0	0	0	0	0	0	0	0	0	0	0	0	0	0	0	0	1.342	1.307	1.340	1.298	1.253	1.318	0.936	0.000	0.000	0.000	0.000	0.000	0.000	0.000	0.000	0.000	0.000	0.000	0.000	0.000	0.000	80	542	16549	16261	0.424	Error	Error	9482	7067	0	0	9213	7048	0	0	0	0
1	5	7	""	"YLR270W"	2250	26790	80	6364	6150	1212	113	133	105	100	100	0	5993	5841	1105	80	96	94	100	100	0	0	0	0	0	0	0	0	0	0	0	0	0	0	0	0	0	0	0	1.057	1.048	1.016	1.036	1.317	1.058	0.911	0.000	0.000	0.000	0.000	0.000	0.000	0.000	0.000	0.000	0.000	0.000	0.000	0.000	0.000	52	340	12164	11798	0.080	Error	Error	6251	5913	0	0	6037	5761	0	0	0	0
1	6	7	""	"YLR301W"	2450	26780	90	4447	4375	952	119	131	69	100	100	0	3684	3605	702	77	86	45	100	100	0	0	0	0	0	0	0	0	0	0	0	0	0	0	0	0	0	0	0	1.200	1.206	1.189	1.230	1.373	1.227	0.917	0.000	0.000	0.000	0.000	0.000	0.000	0.000	0.000	0.000	0.000	0.000	0.000	0.000	0.000	52	420	7935	7784	0.263	Error	Error	4328	3607	0	0	4256	3528	0	0	0	0
1	7	7	"MPT1"	"YMR005W"	2650	26780	60	2043	2671	2357	115	128	57	100	100	0	10112	15029	14220	90	106	96	100	100	0	0	0	0	0	0	0	0	0	0	0	0	0	0	0	0	0	0	0	0.192	0.171	0.166	0.171	1.566	0.157	0.898	0.000	0.000	0.000	0.000	0.000	0.000	0.000	0.000	0.000	0.000	0.000	0.000	0.000	0.000	32	176	11950	17495	-2.378	Error	Error	1928	10022	0	0	2556	14939	0	0	0	0
1	8	7	"MIH1"	"YMR036C"	2860	26780	70	854	1879	2076	124	139	80	100	90	0	1165	2738	3294	84	96	51	100	100	0	0	0	0	0	0	0	0	0	0	0	0	0	0	0	0	0	0	0	0.675	0.661	0.724	0.679	1.749	0.616	0.833	0.000	0.000	0.000	0.000	0.000	0.000	0.000	0.000	0.000	0.000	0.000	0.000	0.000	0.000	32	236	1811	4409	-0.566	Error	Error	730	1081	0	0	1755	2654	0	0	0	0
1	9	7	""	"YMR067C"	3040	26780	60	1280	2016	1942	116	126	60	100	100	0	2523	3784	3701	85	97	66	100	100	0	0	0	0	0	0	0	0	0	0	0	0	0	0	0	0	0	0	0	0.477	0.514	0.515	0.542	1.491	0.502	0.896	0.000	0.000	0.000	0.000	0.000	0.000	0.000	0.000	0.000	0.000	0.000	0.000	0.000	0.000	32	176	3602	5599	-1.067	Error	Error	1164	2438	0	0	1900	3699	0	0	0	0
1	10	7	""	"YMR007W"	3250	26780	90	2545	2507	525	113	122	57	100	100	0	4568	4449	854	73	82	37	100	100	0	0	0	0	0	0	0	0	0	0	0	0	0	0	0	0	0	0	0	0.541	0.547	0.536	0.544	1.232	0.541	0.908	0.000	0.000	0.000	0.000	0.000	0.000	0.000	0.000	0.000	0.000	0.000	0.000	0.000	0.000	52	420	6927	6770	-0.886	Error	Error	2432	4495	0	0	2394	4376	0	0	0	0
1	11	7	"LYS7"	"YMR038C"	3430	26780	70	7336	7262	1441	122	430	1329	100	100	0	2278	2100	603	74	207	505	93	93	0	0	0	0	0	0	0	0	0	0	0	0	0	0	0	0	0	0	0	3.273	3.524	3.440	3.891	1.721	3.252	0.905	0.000	0.000	0.000	0.000	0.000	0.000	0.000	0.000	0.000	0.000	0.000	0.000	0.000	0.000	32	236	9418	9166	1.711	Error	Error	7214	2204	0	0	7140	2026	0	0	0	0
1	12	7	""	"YMR069W"	3640	26780	70	1817	1835	330	120	138	93	100	100	0	1103	1077	173	80	101	86	100	100	0	0	0	0	0	0	0	0	0	0	0	0	0	0	0	0	0	0	0	1.659	1.720	1.631	1.723	1.280	1.805	0.904	0.000	0.000	0.000	0.000	0.000	0.000	0.000	0.000	0.000	0.000	0.000	0.000	0.000	0.000	32	236	2720	2712	0.730	Error	Error	1697	1023	0	0	1715	997	0	0	0	0
1	13	7	""	"YMR009W"	3860	26780	70	5218	5123	1202	116	151	299	100	100	0	2995	2872	548	77	90	94	100	100	0	0	0	0	0	0	0	0	0	0	0	0	0	0	0	0	0	0	0	1.748	1.791	1.786	1.778	1.245	1.843	0.890	0.000	0.000	0.000	0.000	0.000	0.000	0.000	0.000	0.000	0.000	0.000	0.000	0.000	0.000	32	236	8020	7802	0.806	Error	Error	5102	2918	0	0	5007	2795	0	0	0	0
1	14	7	""	"YMR040W"	4060	26780	70	2786	2604	1161	107	126	102	100	100	0	1511	1478	623	75	84	43	100	100	0	0	0	0	0	0	0	0	0	0	0	0	0	0	0	0	0	0	0	1.866	1.780	1.832	1.742	1.552	1.886	0.862	0.000	0.000	0.000	0.000	0.000	0.000	0.000	0.000	0.000	0.000	0.000	0.000	0.000	0.000	32	236	4115	3900	0.900	Error	Error	2679	1436	0	0	2497	1403	0	0	0	0
1	15	7	""	"YMR071C"	4240	26780	70	5962	5846	2174	106	171	374	100	100	0	7404	6860	1899	80	207	763	100	100	0	0	0	0	0	0	0	0	0	0	0	0	0	0	0	0	0	0	0	0.800	0.847	0.836	0.810	1.377	0.835	0.898	0.000	0.000	0.000	0.000	0.000	0.000	0.000	0.000	0.000	0.000	0.000	0.000	0.000	0.000	32	236	13180	12520	-0.323	Error	Error	5856	7324	0	0	5740	6780	0	0	0	0
1	16	7	"HXT2"	"YMR011W"	4450	26780	80	9490	9155	1847	101	112	90	100	100	0	9987	9604	2037	67	79	83	100	100	0	0	0	0	0	0	0	0	0	0	0	0	0	0	0	0	0	0	0	0.946	0.949	0.968	0.971	1.412	0.915	0.903	0.000	0.000	0.000	0.000	0.000	0.000	0.000	0.000	0.000	0.000	0.000	0.000	0.000	0.000	52	340	19309	18591	-0.079	Error	Error	9389	9920	0	0	9054	9537	0	0	0	0
1	17	7	"ARG80"	"YMR042W"	4650	26780	80	4381	4305	627	94	105	65	100	100	0	1360	1355	192	67	77	52	100	100	0	0	0	0	0	0	0	0	0	0	0	0	0	0	0	0	0	0	0	3.316	3.269	3.274	3.269	1.258	3.480	0.884	0.000	0.000	0.000	0.000	0.000	0.000	0.000	0.000	0.000	0.000	0.000	0.000	0.000	0.000	52	340	5580	5499	1.729	Error	Error	4287	1293	0	0	4211	1288	0	0	0	0
1	18	7	""	"YMR073C"	4860	26780	80	2428	2502	659	101	112	71	100	100	0	2243	2202	467	70	79	48	100	100	0	0	0	0	0	0	0	0	0	0	0	0	0	0	0	0	0	0	0	1.071	1.126	1.110	1.117	1.353	1.129	0.903	0.000	0.000	0.000	0.000	0.000	0.000	0.000	0.000	0.000	0.000	0.000	0.000	0.000	0.000	52	340	4500	4533	0.099	Error	Error	2327	2173	0	0	2401	2132	0	0	0	0
1	19	7	""	"YNL047C"	5060	26770	70	9941	9629	1749	107	136	167	100	100	0	8152	8000	1284	76	136	343	100	100	0	0	0	0	0	0	0	0	0	0	0	0	0	0	0	0	0	0	0	1.218	1.202	1.221	1.208	1.263	1.159	0.895	0.000	0.000	0.000	0.000	0.000	0.000	0.000	0.000	0.000	0.000	0.000	0.000	0.000	0.000	32	236	17910	17446	0.284	Error	Error	9834	8076	0	0	9522	7924	0	0	0	0
1	20	7	""	"YNL080C"	5280	26800	140	3687	2932	1754	99	155	412	75	73	0	3400	2674	1612	68	135	430	74	73	0	0	0	0	0	0	0	0	0	0	0	0	0	0	0	0	0	0	0	1.077	1.087	1.116	1.136	1.672	1.094	0.934	0.000	0.000	0.000	0.000	0.000	0.000	0.000	0.000	0.000	0.000	0.000	0.000	0.000	0.000	156	896	6920	5439	0.107	Error	Error	3588	3332	0	0	2833	2606	0	0	0	0
1	21	7	"DBP2"	"YNL112W"	5450	26770	90	9583	9296	5291	101	153	406	100	98	0	9248	9224	3845	66	129	454	98	96	0	0	0	0	0	0	0	0	0	0	0	0	0	0	0	0	0	0	0	1.033	1.004	1.017	0.994	1.911	1.063	0.801	0.000	0.000	0.000	0.000	0.000	0.000	0.000	0.000	0.000	0.000	0.000	0.000	0.000	0.000	52	375	18664	18353	0.046	Error	Error	9482	9182	0	0	9195	9158	0	0	0	0
1	1	8	"SFB2"	"YNL049C"	1440	26980	70	2165	2475	1549	121	139	87	96	93	0	2541	2938	1819	77	104	118	100	100	0	0	0	0	0	0	0	0	0	0	0	0	0	0	0	0	0	0	0	0.830	0.823	0.836	0.777	1.517	0.800	0.899	0.000	0.000	0.000	0.000	0.000	0.000	0.000	0.000	0.000	0.000	0.000	0.000	0.000	0.000	32	236	4508	5215	-0.270	Error	Error	2044	2464	0	0	2354	2861	0	0	0	0
1	2	8	"PMS1"	"YNL082W"	1650	26980	60	10632	9884	2652	116	122	54	100	100	0	18281	16943	4293	79	91	45	100	100	0	0	0	0	0	0	0	0	0	0	0	0	0	0	0	0	0	0	0	0.578	0.579	0.605	0.578	1.200	0.568	0.943	0.000	0.000	0.000	0.000	0.000	0.000	0.000	0.000	0.000	0.000	0.000	0.000	0.000	0.000	32	176	28718	26632	-0.792	Error	Error	10516	18202	0	0	9768	16864	0	0	0	0
1	3	8	""	"YNL114C"	1840	26980	70	6911	6386	1756	110	245	827	100	100	0	3148	2920	729	75	156	432	100	96	0	0	0	0	0	0	0	0	0	0	0	0	0	0	0	0	0	0	0	2.213	2.206	2.217	2.221	1.312	2.211	0.935	0.000	0.000	0.000	0.000	0.000	0.000	0.000	0.000	0.000	0.000	0.000	0.000	0.000	0.000	32	236	9874	9121	1.146	Error	Error	6801	3073	0	0	6276	2845	0	0	0	0
1	4	8	""	"YNL051W"	2050	26980	90	4813	4622	1025	111	124	76	98	98	0	8667	8388	1842	83	94	46	100	98	0	0	0	0	0	0	0	0	0	0	0	0	0	0	0	0	0	0	0	0.548	0.543	0.563	0.532	1.295	0.504	0.912	0.000	0.000	0.000	0.000	0.000	0.000	0.000	0.000	0.000	0.000	0.000	0.000	0.000	0.000	52	420	13286	12816	-0.868	Error	Error	4702	8584	0	0	4511	8305	0	0	0	0
1	5	8	"END3"	"YNL084C"	2260	26990	80	4445	4225	1666	109	123	67	100	100	0	9734	9046	2579	81	91	61	100	100	0	0	0	0	0	0	0	0	0	0	0	0	0	0	0	0	0	0	0	0.449	0.459	0.433	0.443	1.499	0.456	0.865	0.000	0.000	0.000	0.000	0.000	0.000	0.000	0.000	0.000	0.000	0.000	0.000	0.000	0.000	52	340	13989	13081	-1.155	Error	Error	4336	9653	0	0	4116	8965	0	0	0	0
1	6	8	""	"YNL116W"	2450	26980	80	10744	10819	2588	108	121	57	100	100	0	14384	14003	2406	78	88	46	100	100	0	0	0	0	0	0	0	0	0	0	0	0	0	0	0	0	0	0	0	0.743	0.769	0.757	0.773	1.368	0.762	0.904	0.000	0.000	0.000	0.000	0.000	0.000	0.000	0.000	0.000	0.000	0.000	0.000	0.000	0.000	52	340	24942	24636	-0.428	Error	Error	10636	14306	0	0	10711	13925	0	0	0	0
1	7	8	"MSG5"	"YNL053W"	2650	26990	80	9587	9644	1149	131	138	67	100	100	0	3929	3925	390	85	96	42	100	100	0	0	0	0	0	0	0	0	0	0	0	0	0	0	0	0	0	0	0	2.460	2.477	2.532	2.472	1.180	2.544	0.914	0.000	0.000	0.000	0.000	0.000	0.000	0.000	0.000	0.000	0.000	0.000	0.000	0.000	0.000	52	340	13300	13353	1.299	Error	Error	9456	3844	0	0	9513	3840	0	0	0	0
1	8	8	""	"YNL086W"	2840	26990	90	5614	6366	3210	137	165	152	100	100	0	5805	6262	3508	86	195	650	100	96	0	0	0	0	0	0	0	0	0	0	0	0	0	0	0	0	0	0	0	0.958	1.009	0.990	1.044	1.598	0.961	0.855	0.000	0.000	0.000	0.000	0.000	0.000	0.000	0.000	0.000	0.000	0.000	0.000	0.000	0.000	52	420	11196	12405	-0.062	Error	Error	5477	5719	0	0	6229	6176	0	0	0	0
1	9	8	"DCP2"	"YNL118C"	3050	26980	70	11748	11131	2403	133	168	178	100	100	0	8206	7788	1798	94	283	1341	96	93	0	0	0	0	0	0	0	0	0	0	0	0	0	0	0	0	0	0	0	1.432	1.429	1.475	1.470	1.236	1.342	0.791	0.000	0.000	0.000	0.000	0.000	0.000	0.000	0.000	0.000	0.000	0.000	0.000	0.000	0.000	32	236	19727	18692	0.518	Error	Error	11615	8112	0	0	10998	7694	0	0	0	0
1	10	8	"CMK2"	"YOL016C"	3260	26980	60	558	1262	1464	120	138	81	81	75	0	958	2087	2440	82	113	203	81	71	0	0	0	0	0	0	0	0	0	0	0	0	0	0	0	0	0	0	0	0.500	0.570	0.547	0.530	2.114	0.559	0.798	0.000	0.000	0.000	0.000	0.000	0.000	0.000	0.000	0.000	0.000	0.000	0.000	0.000	0.000	32	176	1314	3147	-1.000	Error	Error	438	876	0	0	1142	2005	0	0	0	0
1	11	8	""	"YOL048C"	3450	26990	80	3519	3680	1884	108	118	74	100	100	0	6541	6545	2696	74	85	72	100	100	0	0	0	0	0	0	0	0	0	0	0	0	0	0	0	0	0	0	0	0.527	0.552	0.552	0.510	1.561	0.550	0.884	0.000	0.000	0.000	0.000	0.000	0.000	0.000	0.000	0.000	0.000	0.000	0.000	0.000	0.000	52	340	9878	10043	-0.923	Error	Error	3411	6467	0	0	3572	6471	0	0	0	0
1	12	8	""	"YOL080C"	3650	26980	70	6097	5819	1235	111	131	101	100	100	0	7322	6844	1414	83	132	281	100	100	0	0	0	0	0	0	0	0	0	0	0	0	0	0	0	0	0	0	0	0.827	0.844	0.850	0.842	1.227	0.804	0.919	0.000	0.000	0.000	0.000	0.000	0.000	0.000	0.000	0.000	0.000	0.000	0.000	0.000	0.000	32	236	13225	12469	-0.274	Error	Error	5986	7239	0	0	5708	6761	0	0	0	0
1	13	8	"TLG2"	"YOL018C"	3850	26980	70	9515	9007	3854	111	185	486	100	100	0	16682	14375	5855	76	257	1207	100	100	0	0	0	0	0	0	0	0	0	0	0	0	0	0	0	0	0	0	0	0.566	0.622	0.624	0.610	1.272	0.637	0.941	0.000	0.000	0.000	0.000	0.000	0.000	0.000	0.000	0.000	0.000	0.000	0.000	0.000	0.000	32	236	26010	23195	-0.820	Error	Error	9404	16606	0	0	8896	14299	0	0	0	0
1	14	8	""	"YOL050C"	4050	26980	70	1462	1408	288	100	116	72	100	100	0	1029	1021	227	69	85	98	100	100	0	0	0	0	0	0	0	0	0	0	0	0	0	0	0	0	0	0	0	1.419	1.374	1.452	1.380	1.276	1.357	0.841	0.000	0.000	0.000	0.000	0.000	0.000	0.000	0.000	0.000	0.000	0.000	0.000	0.000	0.000	32	236	2322	2260	0.505	Error	Error	1362	960	0	0	1308	952	0	0	0	0
1	15	8	""	"YOL082W"	4250	26980	70	8701	8527	1520	107	366	1230	100	100	0	2639	2491	441	67	180	477	100	96	0	0	0	0	0	0	0	0	0	0	0	0	0	0	0	0	0	0	0	3.341	3.474	3.554	3.484	1.176	3.277	0.899	0.000	0.000	0.000	0.000	0.000	0.000	0.000	0.000	0.000	0.000	0.000	0.000	0.000	0.000	32	236	11166	10844	1.740	Error	Error	8594	2572	0	0	8420	2424	0	0	0	0
1	16	8	"TAT2"	"YOL020W"	4460	26990	70	13649	13512	1611	101	225	760	100	100	0	5062	5051	380	63	87	111	100	100	0	0	0	0	0	0	0	0	0	0	0	0	0	0	0	0	0	0	0	2.710	2.689	2.742	2.677	1.172	2.659	0.923	0.000	0.000	0.000	0.000	0.000	0.000	0.000	0.000	0.000	0.000	0.000	0.000	0.000	0.000	32	236	18547	18399	1.438	Error	Error	13548	4999	0	0	13411	4988	0	0	0	0
1	17	8	"SPE2"	"YOL052C"	4650	26990	80	7345	6632	2208	94	101	51	100	100	0	2208	1994	727	62	76	168	94	94	0	0	0	0	0	0	0	0	0	0	0	0	0	0	0	0	0	0	0	3.379	3.384	3.416	3.763	1.945	3.411	0.890	0.000	0.000	0.000	0.000	0.000	0.000	0.000	0.000	0.000	0.000	0.000	0.000	0.000	0.000	52	340	9397	8470	1.757	Error	Error	7251	2146	0	0	6538	1932	0	0	0	0
1	18	8	""	"YOL084W"	4850	26990	60	11953	11549	1801	94	116	110	100	100	0	5184	5117	568	65	95	148	100	100	0	0	0	0	0	0	0	0	0	0	0	0	0	0	0	0	0	0	0	2.317	2.267	2.317	2.255	1.161	2.271	0.929	0.000	0.000	0.000	0.000	0.000	0.000	0.000	0.000	0.000	0.000	0.000	0.000	0.000	0.000	32	176	16978	16507	1.212	Error	Error	11859	5119	0	0	11455	5052	0	0	0	0
1	19	8	""	"YOL022C"	5060	26990	100	5198	4784	1622	96	125	227	97	96	0	7701	7060	1938	67	105	501	98	97	0	0	0	0	0	0	0	0	0	0	0	0	0	0	0	0	0	0	0	0.668	0.670	0.678	0.627	1.528	0.679	0.912	0.000	0.000	0.000	0.000	0.000	0.000	0.000	0.000	0.000	0.000	0.000	0.000	0.000	0.000	80	534	12736	11681	-0.581	Error	Error	5102	7634	0	0	4688	6993	0	0	0	0
1	20	8	""	"YOL053W"	5250	26980	90	7919	7990	922	95	109	58	100	100	0	9169	8922	1294	69	87	79	100	100	0	0	0	0	0	0	0	0	0	0	0	0	0	0	0	0	0	0	0	0.860	0.892	0.890	0.905	1.276	0.848	0.883	0.000	0.000	0.000	0.000	0.000	0.000	0.000	0.000	0.000	0.000	0.000	0.000	0.000	0.000	52	381	16924	16748	-0.218	Error	Error	7824	9100	0	0	7895	8853	0	0	0	0
1	21	8	"ADH1"	"YOL086C"	5440	26990	70	8907	8804	1184	93	352	1379	100	100	0	2521	2474	562	62	170	470	96	96	0	0	0	0	0	0	0	0	0	0	0	0	0	0	0	0	0	0	0	3.584	3.612	3.652	3.759	1.405	3.589	0.908	0.000	0.000	0.000	0.000	0.000	0.000	0.000	0.000	0.000	0.000	0.000	0.000	0.000	0.000	32	236	11273	11123	1.842	Error	Error	8814	2459	0	0	8711	2412	0	0	0	0
1	1	9	"RPL33B"	"YOR234C"	1440	27200	80	5248	5154	1631	116	136	103	100	98	0	6994	6688	1566	79	91	54	100	100	0	0	0	0	0	0	0	0	0	0	0	0	0	0	0	0	0	0	0	0.742	0.762	0.749	0.723	1.386	0.766	0.892	0.000	0.000	0.000	0.000	0.000	0.000	0.000	0.000	0.000	0.000	0.000	0.000	0.000	0.000	52	332	12047	11647	-0.430	Error	Error	5132	6915	0	0	5038	6609	0	0	0	0
1	2	9	"PNT1"	"YOR266W"	1640	27200	60	1143	1209	596	118	133	85	100	100	0	2129	2443	1592	77	114	196	100	93	0	0	0	0	0	0	0	0	0	0	0	0	0	0	0	0	0	0	0	0.500	0.461	0.500	0.499	1.690	0.395	0.742	0.000	0.000	0.000	0.000	0.000	0.000	0.000	0.000	0.000	0.000	0.000	0.000	0.000	0.000	32	176	3077	3457	-1.001	Error	Error	1025	2052	0	0	1091	2366	0	0	0	0
1	3	9	""	"YOR298W"	1860	27190	70	7606	7412	1444	115	267	774	100	100	0	9176	8864	1702	81	235	816	100	100	0	0	0	0	0	0	0	0	0	0	0	0	0	0	0	0	0	0	0	0.824	0.831	0.838	0.834	1.181	0.810	0.948	0.000	0.000	0.000	0.000	0.000	0.000	0.000	0.000	0.000	0.000	0.000	0.000	0.000	0.000	32	236	16586	16080	-0.280	Error	Error	7491	9095	0	0	7297	8783	0	0	0	0
1	4	9	"DFR1"	"YOR236W"	2060	27200	70	6545	6368	956	118	279	863	100	100	0	4244	4283	436	86	160	388	100	100	0	0	0	0	0	0	0	0	0	0	0	0	0	0	0	0	0	0	0	1.546	1.489	1.466	1.478	1.167	1.504	0.925	0.000	0.000	0.000	0.000	0.000	0.000	0.000	0.000	0.000	0.000	0.000	0.000	0.000	0.000	32	236	10585	10447	0.628	Error	Error	6427	4158	0	0	6250	4197	0	0	0	0
1	5	9	""	"YOR268C"	2250	27190	70	3181	3169	507	113	132	79	100	100	0	1698	1725	351	80	95	72	100	100	0	0	0	0	0	0	0	0	0	0	0	0	0	0	0	0	0	0	0	1.896	1.858	1.870	1.878	1.182	1.857	0.908	0.000	0.000	0.000	0.000	0.000	0.000	0.000	0.000	0.000	0.000	0.000	0.000	0.000	0.000	32	236	4686	4701	0.923	Error	Error	3068	1618	0	0	3056	1645	0	0	0	0
1	6	9	""	"YOR300W"	2450	27190	70	2420	2228	695	115	131	89	100	100	0	1115	1072	307	72	80	35	100	100	0	0	0	0	0	0	0	0	0	0	0	0	0	0	0	0	0	0	0	2.210	2.113	2.087	2.076	1.326	2.396	0.838	0.000	0.000	0.000	0.000	0.000	0.000	0.000	0.000	0.000	0.000	0.000	0.000	0.000	0.000	32	236	3348	3113	1.144	Error	Error	2305	1043	0	0	2113	1000	0	0	0	0
1	7	9	""	"YOR238W"	2650	27190	70	6237	5801	1509	125	177	288	100	100	0	3878	3712	886	81	145	380	100	100	0	0	0	0	0	0	0	0	0	0	0	0	0	0	0	0	0	0	0	1.610	1.563	1.576	1.566	1.223	1.602	0.897	0.000	0.000	0.000	0.000	0.000	0.000	0.000	0.000	0.000	0.000	0.000	0.000	0.000	0.000	32	236	9909	9307	0.687	Error	Error	6112	3797	0	0	5676	3631	0	0	0	0
1	8	9	"VPH1"	"YOR270C"	2850	27190	70	10572	10371	2833	132	292	1022	100	100	0	9887	9467	2566	92	336	1350	100	96	0	0	0	0	0	0	0	0	0	0	0	0	0	0	0	0	0	0	0	1.066	1.092	1.082	1.102	1.327	1.099	0.889	0.000	0.000	0.000	0.000	0.000	0.000	0.000	0.000	0.000	0.000	0.000	0.000	0.000	0.000	32	236	20235	19614	0.092	Error	Error	10440	9795	0	0	10239	9375	0	0	0	0
1	9	9	""	"YOR302W"	3050	27200	70	491	555	274	125	144	90	96	81	0	373	457	262	78	99	120	93	59	0	0	0	0	0	0	0	0	0	0	0	0	0	0	0	0	0	0	0	1.241	1.135	1.305	1.048	3.062	0.941	0.337	0.000	0.000	0.000	0.000	0.000	0.000	0.000	0.000	0.000	0.000	0.000	0.000	0.000	0.000	32	231	661	809	0.311	Error	Error	366	295	0	0	430	379	0	0	0	0
1	10	9	""	"YOR240W"	3250	27200	90	6992	6901	1636	119	130	80	100	100	0	4849	4753	656	78	108	234	100	100	0	0	0	0	0	0	0	0	0	0	0	0	0	0	0	0	0	0	0	1.441	1.451	1.433	1.416	1.284	1.496	0.900	0.000	0.000	0.000	0.000	0.000	0.000	0.000	0.000	0.000	0.000	0.000	0.000	0.000	0.000	52	403	11644	11457	0.527	Error	Error	6873	4771	0	0	6782	4675	0	0	0	0
1	11	9	"YTM1"	"YOR272W"	3450	27200	100	8158	8173	1830	116	128	74	100	100	0	10890	10543	2156	79	92	68	100	100	0	0	0	0	0	0	0	0	0	0	0	0	0	0	0	0	0	0	0	0.744	0.770	0.769	0.767	1.347	0.764	0.924	0.000	0.000	0.000	0.000	0.000	0.000	0.000	0.000	0.000	0.000	0.000	0.000	0.000	0.000	80	490	18853	18521	-0.427	Error	Error	8042	10811	0	0	8057	10464	0	0	0	0
1	12	9	""	"YOR304C-A"	3660	27190	70	2394	2252	768	110	124	99	100	100	0	4961	4491	1248	75	93	72	100	100	0	0	0	0	0	0	0	0	0	0	0	0	0	0	0	0	0	0	0	0.467	0.485	0.460	0.459	1.298	0.477	0.893	0.000	0.000	0.000	0.000	0.000	0.000	0.000	0.000	0.000	0.000	0.000	0.000	0.000	0.000	32	236	7170	6558	-1.097	Error	Error	2284	4886	0	0	2142	4416	0	0	0	0
1	13	9	"GRE1"	"YPL223C"	3840	27190	70	6929	6913	1252	102	261	1013	100	100	0	4353	4267	709	69	205	704	100	100	0	0	0	0	0	0	0	0	0	0	0	0	0	0	0	0	0	0	0	1.594	1.622	1.562	1.624	1.209	1.769	0.854	0.000	0.000	0.000	0.000	0.000	0.000	0.000	0.000	0.000	0.000	0.000	0.000	0.000	0.000	32	236	11111	11009	0.672	Error	Error	6827	4284	0	0	6811	4198	0	0	0	0
1	14	9	"BBP1"	"YPL255W"	4050	27190	70	10431	10099	2853	106	201	617	100	100	0	7285	6911	1892	67	189	713	100	100	0	0	0	0	0	0	0	0	0	0	0	0	0	0	0	0	0	0	0	1.430	1.460	1.450	1.469	1.276	1.450	0.900	0.000	0.000	0.000	0.000	0.000	0.000	0.000	0.000	0.000	0.000	0.000	0.000	0.000	0.000	32	236	17543	16837	0.516	Error	Error	10325	7218	0	0	9993	6844	0	0	0	0
1	15	9	""	"YPR004C"	4250	27200	80	6192	5967	1816	100	106	47	100	100	0	8604	8358	2289	67	74	52	100	100	0	0	0	0	0	0	0	0	0	0	0	0	0	0	0	0	0	0	0	0.714	0.708	0.707	0.694	1.302	0.705	0.886	0.000	0.000	0.000	0.000	0.000	0.000	0.000	0.000	0.000	0.000	0.000	0.000	0.000	0.000	52	340	14629	14158	-0.487	Error	Error	6092	8537	0	0	5867	8291	0	0	0	0
1	16	9	""	"YPL225W"	4450	27200	70	3662	3570	1606	104	118	110	100	100	0	7946	7341	2098	66	132	426	100	100	0	0	0	0	0	0	0	0	0	0	0	0	0	0	0	0	0	0	0	0.452	0.476	0.453	0.428	1.524	0.484	0.888	0.000	0.000	0.000	0.000	0.000	0.000	0.000	0.000	0.000	0.000	0.000	0.000	0.000	0.000	32	236	11438	10741	-1.147	Error	Error	3558	7880	0	0	3466	7275	0	0	0	0
1	17	9	""	"YPL257W"	4650	27190	70	3994	3680	1191	97	122	149	100	100	0	5156	4753	1295	64	124	332	100	100	0	0	0	0	0	0	0	0	0	0	0	0	0	0	0	0	0	0	0	0.765	0.764	0.781	0.744	1.217	0.763	0.911	0.000	0.000	0.000	0.000	0.000	0.000	0.000	0.000	0.000	0.000	0.000	0.000	0.000	0.000	32	236	8989	8272	-0.386	Error	Error	3897	5092	0	0	3583	4689	0	0	0	0
1	18	9	"ICL2"	"YPR006C"	4840	27190	70	10297	9761	1630	102	241	929	100	100	0	13124	12444	2424	69	320	1538	100	96	0	0	0	0	0	0	0	0	0	0	0	0	0	0	0	0	0	0	0	0.781	0.781	0.788	0.795	1.226	0.762	0.944	0.000	0.000	0.000	0.000	0.000	0.000	0.000	0.000	0.000	0.000	0.000	0.000	0.000	0.000	32	236	23250	22034	-0.357	Error	Error	10195	13055	0	0	9659	12375	0	0	0	0
1	19	9	"ALG5"	"YPL227C"	5050	27190	100	3243	3000	1931	98	148	331	82	77	0	8141	6811	4123	67	234	1585	77	73	0	0	0	0	0	0	0	0	0	0	0	0	0	0	0	0	0	0	0	0.390	0.430	0.419	0.421	1.785	0.313	0.725	0.000	0.000	0.000	0.000	0.000	0.000	0.000	0.000	0.000	0.000	0.000	0.000	0.000	0.000	80	543	11219	9646	-1.360	Error	Error	3145	8074	0	0	2902	6744	0	0	0	0
1	20	9	"APM1"	"YPL259C"	5250	27190	70	8735	8065	1858	102	133	208	100	100	0	12911	12761	1875	70	238	1003	100	100	0	0	0	0	0	0	0	0	0	0	0	0	0	0	0	0	0	0	0	0.672	0.627	0.625	0.616	1.241	0.590	0.871	0.000	0.000	0.000	0.000	0.000	0.000	0.000	0.000	0.000	0.000	0.000	0.000	0.000	0.000	32	236	21474	20654	-0.573	Error	Error	8633	12841	0	0	7963	12691	0	0	0	0
1	21	9	""	"YPR008W"	5470	27180	70	6370	6281	2837	104	288	1011	96	93	0	8626	8532	4886	69	352	1663	87	84	0	0	0	0	0	0	0	0	0	0	0	0	0	0	0	0	0	0	0	0.732	0.730	0.743	0.880	1.879	0.644	0.801	0.000	0.000	0.000	0.000	0.000	0.000	0.000	0.000	0.000	0.000	0.000	0.000	0.000	0.000	32	230	14823	14640	-0.450	Error	Error	6266	8557	0	0	6177	8463	0	0	0	0
1	1	10	""	"YPL229W"	1460	27400	100	8603	8066	2218	116	132	93	100	100	0	8494	7743	2220	77	91	83	100	97	0	0	0	0	0	0	0	0	0	0	0	0	0	0	0	0	0	0	0	1.008	1.037	1.027	1.061	1.444	1.034	0.939	0.000	0.000	0.000	0.000	0.000	0.000	0.000	0.000	0.000	0.000	0.000	0.000	0.000	0.000	80	537	16904	15616	0.012	Error	Error	8487	8417	0	0	7950	7666	0	0	0	0
1	2	10	""	"YPL261C"	1640	27400	70	1912	1787	704	126	188	313	100	96	0	1528	1466	733	78	158	343	90	78	0	0	0	0	0	0	0	0	0	0	0	0	0	0	0	0	0	0	0	1.232	1.197	1.273	1.321	1.637	1.172	0.755	0.000	0.000	0.000	0.000	0.000	0.000	0.000	0.000	0.000	0.000	0.000	0.000	0.000	0.000	32	236	3236	3049	0.301	Error	Error	1786	1450	0	0	1661	1388	0	0	0	0
1	3	10	"RPA135"	"YPR010C"	1840	27390	100	9623	11717	6792	119	144	176	100	100	0	10029	10483	6327	79	115	210	97	96	0	0	0	0	0	0	0	0	0	0	0	0	0	0	0	0	0	0	0	0.955	1.115	1.036	1.294	2.046	1.104	0.911	0.000	0.000	0.000	0.000	0.000	0.000	0.000	0.000	0.000	0.000	0.000	0.000	0.000	0.000	80	560	19454	22002	-0.066	Error	Error	9504	9950	0	0	11598	10404	0	0	0	0
1	4	10	"SEC7"	"YDR170C"	2040	27370	50	225	220	92	121	130	60	66	50	0	249	306	267	88	110	77	58	50	0	0	0	0	0	0	0	0	0	0	0	0	0	0	0	0	0	0	0	0.646	0.454	0.425	0.493	3.002	0.460	0.274	0.000	0.000	0.000	0.000	0.000	0.000	0.000	0.000	0.000	0.000	0.000	0.000	0.000	0.000	12	104	265	317	-0.630	Error	Error	104	161	0	0	99	218	0	0	0	0
1	5	10	"YRF1-1"	"YDR545W"	2240	27380	150	136	150	89	119	131	69	22	10	0	81	109	99	81	95	65	16	7	0	0	0	0	0	0	0	0	0	0	0	0	0	0	0	0	0	0	0	100000.000	1.107	1.462	1.559	3.586	1.526	0.146	0.000	0.000	0.000	0.000	0.000	0.000	0.000	0.000	0.000	0.000	0.000	0.000	0.000	0.000	156	942	17	59	16.610	Error	Error	17	0	0	0	31	28	0	0	-50	0
1	6	10	"SWI4"	"YER111C"	2440	27380	150	123	140	77	115	131	88	16	3	0	80	99	69	73	82	39	19	12	0	0	0	0	0	0	0	0	0	0	0	0	0	0	0	0	0	0	0	1.143	0.962	1.806	1.976	3.734	3.397	0.068	0.000	0.000	0.000	0.000	0.000	0.000	0.000	0.000	0.000	0.000	0.000	0.000	0.000	0.000	156	825	15	51	0.193	Error	Error	8	7	0	0	25	26	0	0	-50	0
1	7	10	"ESP1"	"YGR098C"	2640	27380	150	134	152	83	123	150	177	7	0	0	89	111	76	78	154	795	0	0	0	0	0	0	0	0	0	0	0	0	0	0	0	0	0	0	0	0	0	1.000	0.879	1.771	1.684	4.236	0.106	0.595	0.000	0.000	0.000	0.000	0.000	0.000	0.000	0.000	0.000	0.000	0.000	0.000	0.000	0.000	156	931	22	62	0.000	Error	Error	11	11	0	0	29	33	0	0	-50	0
1	8	10	"RIM101"	"YHL027W"	2840	27380	70	176	195	101	130	161	183	15	0	0	124	141	63	88	304	1524	0	0	0	0	0	0	0	0	0	0	0	0	0	0	0	0	0	0	0	0	0	1.278	1.226	1.350	1.197	2.471	0.130	0.782	0.000	0.000	0.000	0.000	0.000	0.000	0.000	0.000	0.000	0.000	0.000	0.000	0.000	0.000	32	236	82	118	0.354	Error	Error	46	36	0	0	65	53	0	0	0	0
1	9	10	"MIP6"	"YHR015W"	3040	27380	150	120	136	76	124	143	133	6	1	0	86	110	70	82	114	315	0	0	0	0	0	0	0	0	0	0	0	0	0	0	0	0	0	0	0	0	0	-1.000	0.429	1.737	1.880	3.673	0.338	0.616	0.000	0.000	0.000	0.000	0.000	0.000	0.000	0.000	0.000	0.000	0.000	0.000	0.000	0.000	156	1061	0	40	Error	Error	Error	-4	4	0	0	12	28	0	0	-50	0
1	10	10	"VTH1"	"YIL173W"	3290	27360	90	169	398	872	119	129	70	32	21	0	90	707	2043	79	100	129	19	9	0	0	0	0	0	0	0	0	0	0	0	0	0	0	0	0	0	0	0	4.545	0.444	2.040	1.732	4.639	0.397	0.814	0.000	0.000	0.000	0.000	0.000	0.000	0.000	0.000	0.000	0.000	0.000	0.000	0.000	0.000	52	327	61	907	2.184	Error	Error	50	11	0	0	279	628	0	0	0	0
1	11	10	""	"YJR029W"	3440	27380	150	126	136	75	112	127	68	19	7	0	82	103	82	77	91	85	9	7	0	0	0	0	0	0	0	0	0	0	0	0	0	0	0	0	0	0	0	2.800	0.923	1.667	1.752	3.947	1.692	0.234	0.000	0.000	0.000	0.000	0.000	0.000	0.000	0.000	0.000	0.000	0.000	0.000	0.000	0.000	156	906	19	50	1.485	Error	Error	14	5	0	0	24	26	0	0	-50	0
1	12	10	""	"YLL034C"	3650	27370	50	141	165	107	122	131	68	33	8	0	180	156	64	71	91	58	66	50	0	0	0	0	0	0	0	0	0	0	0	0	0	0	0	0	0	0	0	0.174	0.506	0.741	0.684	2.822	1.489	0.301	0.000	0.000	0.000	0.000	0.000	0.000	0.000	0.000	0.000	0.000	0.000	0.000	0.000	0.000	12	104	128	128	-2.520	Error	Error	19	109	0	0	43	85	0	0	0	0
1	13	10	"ESC1"	"YMR219W"	3840	27380	150	110	125	133	107	155	514	0	0	0	69	102	122	69	107	354	1	0	0	0	0	0	0	0	0	0	0	0	0	0	0	0	0	0	0	0	0	100000.000	0.545	1.445	1.340	4.009	1.356	0.396	0.000	0.000	0.000	0.000	0.000	0.000	0.000	0.000	0.000	0.000	0.000	0.000	0.000	0.000	156	938	3	51	16.610	Error	Error	3	0	0	0	18	33	0	0	-50	0
1	14	10	"YKU70"	"YMR284W"	4040	27380	150	112	127	78	103	132	305	1	0	0	74	90	63	65	98	354	1	0	0	0	0	0	0	0	0	0	0	0	0	0	0	0	0	0	0	0	0	1.000	0.960	1.460	1.236	4.205	2.394	0.108	0.000	0.000	0.000	0.000	0.000	0.000	0.000	0.000	0.000	0.000	0.000	0.000	0.000	0.000	156	930	18	49	0.000	Error	Error	9	9	0	0	24	25	0	0	-50	0
1	15	10	"POL1"	"YNL102W"	4250	27400	60	171	168	77	102	111	55	53	21	0	105	144	98	61	72	56	46	25	0	0	0	0	0	0	0	0	0	0	0	0	0	0	0	0	0	0	0	1.568	0.795	1.174	1.286	6.285	0.962	0.380	0.000	0.000	0.000	0.000	0.000	0.000	0.000	0.000	0.000	0.000	0.000	0.000	0.000	0.000	32	176	113	149	0.649	Error	Error	69	44	0	0	66	83	0	0	0	0
1	16	10	""	"YMRWdelta20"	4460	27390	70	1899	1728	582	97	106	66	100	100	0	1923	1872	594	63	74	55	100	100	0	0	0	0	0	0	0	0	0	0	0	0	0	0	0	0	0	0	0	0.969	0.902	0.903	0.881	1.285	0.881	0.878	0.000	0.000	0.000	0.000	0.000	0.000	0.000	0.000	0.000	0.000	0.000	0.000	0.000	0.000	32	236	3662	3440	-0.046	Error	Error	1802	1860	0	0	1631	1809	0	0	0	0
1	17	10	""	"IntYNL112W"	4650	27400	80	698	1372	1427	96	116	98	92	84	0	1325	2177	2268	65	165	663	71	46	0	0	0	0	0	0	0	0	0	0	0	0	0	0	0	0	0	0	0	0.478	0.604	0.535	0.625	1.909	0.531	0.779	0.000	0.000	0.000	0.000	0.000	0.000	0.000	0.000	0.000	0.000	0.000	0.000	0.000	0.000	52	340	1862	3388	-1.066	Error	Error	602	1260	0	0	1276	2112	0	0	0	0
1	18	10	""	"CEN14"	4870	27400	80	159	198	148	94	105	59	53	28	0	189	286	263	62	76	80	63	38	0	0	0	0	0	0	0	0	0	0	0	0	0	0	0	0	0	0	0	0.512	0.464	0.408	0.454	3.519	0.147	0.159	0.000	0.000	0.000	0.000	0.000	0.000	0.000	0.000	0.000	0.000	0.000	0.000	0.000	0.000	52	340	192	328	-0.966	Error	Error	65	127	0	0	104	224	0	0	0	0
1	19	10	""	"YORCdelta11"	5070	27380	70	1942	1893	794	101	147	207	100	93	0	1593	1476	516	65	96	137	100	100	0	0	0	0	0	0	0	0	0	0	0	0	0	0	0	0	0	0	0	1.205	1.270	1.220	1.214	1.351	1.332	0.898	0.000	0.000	0.000	0.000	0.000	0.000	0.000	0.000	0.000	0.000	0.000	0.000	0.000	0.000	32	236	3369	3203	0.269	Error	Error	1841	1528	0	0	1792	1411	0	0	0	0
1	20	10	""	"YORWdelta16"	5250	27390	60	991	1032	746	90	102	55	96	87	0	1229	1459	1121	64	75	62	100	100	0	0	0	0	0	0	0	0	0	0	0	0	0	0	0	0	0	0	0	0.773	0.675	0.684	0.648	1.571	0.641	0.826	0.000	0.000	0.000	0.000	0.000	0.000	0.000	0.000	0.000	0.000	0.000	0.000	0.000	0.000	32	176	2066	2337	-0.371	Error	Error	901	1165	0	0	942	1395	0	0	0	0
1	21	10	""	"YOR298C-A"	5460	27390	70	955	970	299	96	114	86	100	100	0	1089	1073	289	62	93	309	96	93	0	0	0	0	0	0	0	0	0	0	0	0	0	0	0	0	0	0	0	0.836	0.864	0.920	0.851	1.346	0.836	0.820	0.000	0.000	0.000	0.000	0.000	0.000	0.000	0.000	0.000	0.000	0.000	0.000	0.000	0.000	32	236	1886	1885	-0.258	Error	Error	859	1027	0	0	874	1011	0	0	0	0
1	1	11	""	"YPLCdelta10"	1450	27600	80	764	1247	1203	118	140	114	94	80	0	1031	1831	1727	74	90	71	96	94	0	0	0	0	0	0	0	0	0	0	0	0	0	0	0	0	0	0	0	0.675	0.643	0.655	0.640	2.207	0.659	0.899	0.000	0.000	0.000	0.000	0.000	0.000	0.000	0.000	0.000	0.000	0.000	0.000	0.000	0.000	52	340	1603	2886	-0.567	Error	Error	646	957	0	0	1129	1757	0	0	0	0
1	2	11	""	"YPRCdelta13"	1650	27590	70	2762	2473	866	114	136	164	100	100	0	5027	4460	1477	73	99	120	100	100	0	0	0	0	0	0	0	0	0	0	0	0	0	0	0	0	0	0	0	0.535	0.538	0.555	0.531	1.402	0.498	0.867	0.000	0.000	0.000	0.000	0.000	0.000	0.000	0.000	0.000	0.000	0.000	0.000	0.000	0.000	32	236	7602	6746	-0.904	Error	Error	2648	4954	0	0	2359	4387	0	0	0	0
1	3	11	""	"SNR51"	1850	27600	80	505	599	376	117	123	58	96	92	0	338	453	291	71	79	38	100	94	0	0	0	0	0	0	0	0	0	0	0	0	0	0	0	0	0	0	0	1.453	1.262	1.244	1.232	1.801	1.315	0.804	0.000	0.000	0.000	0.000	0.000	0.000	0.000	0.000	0.000	0.000	0.000	0.000	0.000	0.000	52	340	655	864	0.539	Error	Error	388	267	0	0	482	382	0	0	0	0
1	4	11	""	"iYAL068C-0"	2060	27600	70	884	924	760	120	132	65	96	96	0	1159	1481	1142	84	92	39	100	100	0	0	0	0	0	0	0	0	0	0	0	0	0	0	0	0	0	0	0	0.711	0.576	0.492	0.506	1.861	0.583	0.756	0.000	0.000	0.000	0.000	0.000	0.000	0.000	0.000	0.000	0.000	0.000	0.000	0.000	0.000	32	236	1839	2201	-0.493	Error	Error	764	1075	0	0	804	1397	0	0	0	0
1	5	11	""	"iYAL067C"	2250	27600	80	3997	4198	1797	119	130	68	100	100	0	2103	2083	908	91	102	55	100	100	0	0	0	0	0	0	0	0	0	0	0	0	0	0	0	0	0	0	0	1.927	2.048	2.071	2.085	1.263	2.060	0.929	0.000	0.000	0.000	0.000	0.000	0.000	0.000	0.000	0.000	0.000	0.000	0.000	0.000	0.000	52	340	5890	6071	0.947	Error	Error	3878	2012	0	0	4079	1992	0	0	0	0
1	6	11	""	"iYAL064C-A-0"	2450	27590	90	5244	7493	6563	113	127	79	100	100	0	6439	8688	6989	76	87	51	100	100	0	0	0	0	0	0	0	0	0	0	0	0	0	0	0	0	0	0	0	0.806	0.857	0.832	0.831	1.496	0.888	0.901	0.000	0.000	0.000	0.000	0.000	0.000	0.000	0.000	0.000	0.000	0.000	0.000	0.000	0.000	52	414	11494	15992	-0.310	Error	Error	5131	6363	0	0	7380	8612	0	0	0	0
1	7	11	""	"iYBR065C"	2640	27600	80	2666	2651	1240	118	132	68	100	100	0	2141	1885	859	79	89	43	100	100	0	0	0	0	0	0	0	0	0	0	0	0	0	0	0	0	0	0	0	1.236	1.403	1.381	1.409	1.631	1.395	0.884	0.000	0.000	0.000	0.000	0.000	0.000	0.000	0.000	0.000	0.000	0.000	0.000	0.000	0.000	52	340	4610	4339	0.305	Error	Error	2548	2062	0	0	2533	1806	0	0	0	0
1	8	11	""	"iYBR069C"	2840	27590	90	1702	2327	1867	121	130	62	100	100	0	1369	2448	3671	82	95	52	100	100	0	0	0	0	0	0	0	0	0	0	0	0	0	0	0	0	0	0	0	1.228	0.932	1.251	1.219	1.793	0.550	0.534	0.000	0.000	0.000	0.000	0.000	0.000	0.000	0.000	0.000	0.000	0.000	0.000	0.000	0.000	52	420	2868	4572	0.297	Error	Error	1581	1287	0	0	2206	2366	0	0	0	0
1	9	11	""	"iYBR073W"	3040	27590	70	1538	2068	1614	134	170	219	93	81	0	1087	1974	1564	85	146	505	81	50	0	0	0	0	0	0	0	0	0	0	0	0	0	0	0	0	0	0	0	1.401	1.024	0.919	1.009	1.855	0.877	0.784	0.000	0.000	0.000	0.000	0.000	0.000	0.000	0.000	0.000	0.000	0.000	0.000	0.000	0.000	32	236	2406	3823	0.487	Error	Error	1404	1002	0	0	1934	1889	0	0	0	0
1	10	11	""	"iYBR085W-1"	3240	27590	70	3459	3470	2255	121	393	1274	78	62	0	3656	4019	2403	85	827	3950	40	3	0	0	0	0	0	0	0	0	0	0	0	0	0	0	0	0	0	0	0	0.935	0.851	0.806	0.813	1.466	0.445	0.502	0.000	0.000	0.000	0.000	0.000	0.000	0.000	0.000	0.000	0.000	0.000	0.000	0.000	0.000	32	236	6909	7283	-0.097	Error	Error	3338	3571	0	0	3349	3934	0	0	0	0
1	11	11	""	"iYBR089W"	3450	27590	90	5458	8043	7055	117	131	77	100	100	0	5165	7048	4768	79	90	51	100	100	0	0	0	0	0	0	0	0	0	0	0	0	0	0	0	0	0	0	0	1.050	1.137	1.034	1.060	1.466	1.281	0.879	0.000	0.000	0.000	0.000	0.000	0.000	0.000	0.000	0.000	0.000	0.000	0.000	0.000	0.000	52	414	10427	14895	0.071	Error	Error	5341	5086	0	0	7926	6969	0	0	0	0
1	12	11	""	"iYBR093C"	3660	27590	80	1724	2197	1614	110	121	60	100	100	0	1182	1419	933	71	82	49	96	94	0	0	0	0	0	0	0	0	0	0	0	0	0	0	0	0	0	0	0	1.453	1.548	1.505	1.473	1.750	1.660	0.914	0.000	0.000	0.000	0.000	0.000	0.000	0.000	0.000	0.000	0.000	0.000	0.000	0.000	0.000	52	340	2725	3435	0.539	Error	Error	1614	1111	0	0	2087	1348	0	0	0	0
1	13	11	""	"iYBR111C"	3850	27600	90	5228	5655	3083	108	118	58	100	100	0	7322	7214	3229	68	79	44	100	100	0	0	0	0	0	0	0	0	0	0	0	0	0	0	0	0	0	0	0	0.706	0.776	0.771	0.722	1.399	0.818	0.925	0.000	0.000	0.000	0.000	0.000	0.000	0.000	0.000	0.000	0.000	0.000	0.000	0.000	0.000	52	420	12374	12693	-0.503	Error	Error	5120	7254	0	0	5547	7146	0	0	0	0
1	14	11	""	"iYBR117C"	4050	27590	90	4911	6930	5121	106	115	56	100	100	0	3877	5015	3343	70	76	39	100	100	0	0	0	0	0	0	0	0	0	0	0	0	0	0	0	0	0	0	0	1.262	1.380	1.277	1.336	1.422	1.453	0.927	0.000	0.000	0.000	0.000	0.000	0.000	0.000	0.000	0.000	0.000	0.000	0.000	0.000	0.000	52	414	8612	11769	0.336	Error	Error	4805	3807	0	0	6824	4945	0	0	0	0
1	15	11	""	"iYBR121C"	4260	27590	90	5905	5242	2635	100	106	49	100	100	0	3579	3231	1426	65	69	26	100	100	0	0	0	0	0	0	0	0	0	0	0	0	0	0	0	0	0	0	0	1.652	1.624	1.684	1.572	1.418	1.727	0.915	0.000	0.000	0.000	0.000	0.000	0.000	0.000	0.000	0.000	0.000	0.000	0.000	0.000	0.000	52	420	9319	8308	0.724	Error	Error	5805	3514	0	0	5142	3166	0	0	0	0
1	16	11	""	"iYBR139W"	4450	27590	70	947	883	489	97	102	47	96	87	0	1522	1921	1273	65	76	70	100	100	0	0	0	0	0	0	0	0	0	0	0	0	0	0	0	0	0	0	0	0.583	0.423	0.414	0.395	1.915	0.378	0.858	0.000	0.000	0.000	0.000	0.000	0.000	0.000	0.000	0.000	0.000	0.000	0.000	0.000	0.000	32	236	2307	2642	-0.777	Error	Error	850	1457	0	0	786	1856	0	0	0	0
1	17	11	""	"iYBR143C"	4660	27590	80	3387	4490	3507	95	117	113	100	100	0	2060	2696	2188	62	209	1527	55	34	0	0	0	0	0	0	0	0	0	0	0	0	0	0	0	0	0	0	0	1.648	1.669	1.629	1.769	1.562	1.671	0.923	0.000	0.000	0.000	0.000	0.000	0.000	0.000	0.000	0.000	0.000	0.000	0.000	0.000	0.000	52	340	5290	7029	0.720	Error	Error	3292	1998	0	0	4395	2634	0	0	0	0
1	18	11	""	"iYBR147W"	4850	27590	70	3023	2717	1004	101	118	106	100	100	0	2761	2440	853	66	95	152	100	100	0	0	0	0	0	0	0	0	0	0	0	0	0	0	0	0	0	0	0	1.084	1.102	1.102	1.098	1.281	1.046	0.899	0.000	0.000	0.000	0.000	0.000	0.000	0.000	0.000	0.000	0.000	0.000	0.000	0.000	0.000	32	236	5617	4990	0.117	Error	Error	2922	2695	0	0	2616	2374	0	0	0	0
1	19	11	""	"iYDL240W"	5060	27590	80	839	1324	1134	99	150	609	53	38	0	2939	4371	3813	64	106	580	100	75	0	0	0	0	0	0	0	0	0	0	0	0	0	0	0	0	0	0	0	0.257	0.284	0.305	0.284	1.609	0.282	0.918	0.000	0.000	0.000	0.000	0.000	0.000	0.000	0.000	0.000	0.000	0.000	0.000	0.000	0.000	52	340	3615	5532	-1.958	Error	Error	740	2875	0	0	1225	4307	0	0	0	0
1	20	11	""	"iYDL236W"	5260	27590	90	244	557	527	99	148	557	28	15	0	323	708	706	62	124	642	28	25	0	0	0	0	0	0	0	0	0	0	0	0	0	0	0	0	0	0	0	0.556	0.709	0.721	0.611	2.456	0.718	0.833	0.000	0.000	0.000	0.000	0.000	0.000	0.000	0.000	0.000	0.000	0.000	0.000	0.000	0.000	52	420	406	1104	-0.848	Error	Error	145	261	0	0	458	646	0	0	0	0
1	21	11	""	"iYDL232W"	5450	27590	60	1160	1699	1292	91	102	57	100	93	0	1039	1557	1205	59	77	92	100	96	0	0	0	0	0	0	0	0	0	0	0	0	0	0	0	0	0	0	0	1.091	1.073	1.026	1.004	1.597	1.020	0.896	0.000	0.000	0.000	0.000	0.000	0.000	0.000	0.000	0.000	0.000	0.000	0.000	0.000	0.000	32	176	2049	3106	0.125	Error	Error	1069	980	0	0	1608	1498	0	0	0	0
1	1	12	""	"iYDL216C"	1460	27800	80	1173	1192	429	126	140	81	100	98	0	1091	1059	399	76	88	50	100	100	0	0	0	0	0	0	0	0	0	0	0	0	0	0	0	0	0	0	0	1.032	1.084	1.080	1.099	1.425	1.110	0.864	0.000	0.000	0.000	0.000	0.000	0.000	0.000	0.000	0.000	0.000	0.000	0.000	0.000	0.000	52	340	2062	2049	0.045	Error	Error	1047	1015	0	0	1066	983	0	0	0	0
1	2	12	""	"iYDL212W"	1660	27800	100	970	1259	932	115	132	81	96	95	0	793	963	625	72	85	61	95	95	0	0	0	0	0	0	0	0	0	0	0	0	0	0	0	0	0	0	0	1.186	1.284	1.271	1.216	2.004	1.397	0.902	0.000	0.000	0.000	0.000	0.000	0.000	0.000	0.000	0.000	0.000	0.000	0.000	0.000	0.000	80	542	1576	2035	0.246	Error	Error	855	721	0	0	1144	891	0	0	0	0
1	3	12	""	"itG(GCC)D1"	1860	27790	90	5983	5694	2200	118	134	81	100	100	0	7621	7168	2421	73	84	63	100	100	0	0	0	0	0	0	0	0	0	0	0	0	0	0	0	0	0	0	0	0.777	0.786	0.803	0.745	1.429	0.788	0.923	0.000	0.000	0.000	0.000	0.000	0.000	0.000	0.000	0.000	0.000	0.000	0.000	0.000	0.000	52	420	13413	12671	-0.364	Error	Error	5865	7548	0	0	5576	7095	0	0	0	0
1	4	12	""	"iYDL195W"	2060	27800	80	1537	2113	1377	115	129	68	100	100	0	1281	1562	825	79	91	49	100	100	0	0	0	0	0	0	0	0	0	0	0	0	0	0	0	0	0	0	0	1.183	1.347	1.176	1.231	1.370	1.468	0.918	0.000	0.000	0.000	0.000	0.000	0.000	0.000	0.000	0.000	0.000	0.000	0.000	0.000	0.000	52	340	2624	3481	0.242	Error	Error	1422	1202	0	0	1998	1483	0	0	0	0
1	5	12	""	"iYDL191W"	2260	27800	80	1473	1658	957	113	125	69	100	100	0	4643	4147	2251	81	87	39	100	100	0	0	0	0	0	0	0	0	0	0	0	0	0	0	0	0	0	0	0	0.298	0.380	0.389	0.370	1.490	0.362	0.877	0.000	0.000	0.000	0.000	0.000	0.000	0.000	0.000	0.000	0.000	0.000	0.000	0.000	0.000	52	340	5922	5611	-1.746	Error	Error	1360	4562	0	0	1545	4066	0	0	0	0
1	6	12	""	"iYDL186W"	2460	27800	80	2274	2493	1359	112	125	63	100	100	0	1595	1592	801	70	81	38	98	98	0	0	0	0	0	0	0	0	0	0	0	0	0	0	0	0	0	0	0	1.418	1.564	1.604	1.611	1.605	1.623	0.942	0.000	0.000	0.000	0.000	0.000	0.000	0.000	0.000	0.000	0.000	0.000	0.000	0.000	0.000	52	340	3687	3903	0.504	Error	Error	2162	1525	0	0	2381	1522	0	0	0	0
1	7	12	""	"iYDL170W"	2660	27800	100	730	1030	744	115	129	67	97	96	0	946	1030	727	79	89	41	96	93	0	0	0	0	0	0	0	0	0	0	0	0	0	0	0	0	0	0	0	0.709	0.962	1.016	0.977	1.647	0.993	0.901	0.000	0.000	0.000	0.000	0.000	0.000	0.000	0.000	0.000	0.000	0.000	0.000	0.000	0.000	80	545	1482	1866	-0.495	Error	Error	615	867	0	0	915	951	0	0	0	0
1	8	12	""	"iYDL166C"	2860	27790	70	1211	1293	820	113	128	64	96	96	0	1004	1116	677	87	96	48	100	100	0	0	0	0	0	0	0	0	0	0	0	0	0	0	0	0	0	0	0	1.197	1.147	1.069	1.057	1.509	1.183	0.907	0.000	0.000	0.000	0.000	0.000	0.000	0.000	0.000	0.000	0.000	0.000	0.000	0.000	0.000	32	236	2015	2209	0.260	Error	Error	1098	917	0	0	1180	1029	0	0	0	0
1	9	12	""	"iYDL160C"	3050	27790	70	5495	6869	5397	124	153	123	100	100	0	1958	2477	2112	83	97	57	100	96	0	0	0	0	0	0	0	0	0	0	0	0	0	0	0	0	0	0	0	2.865	2.817	2.906	3.331	1.615	2.758	0.932	0.000	0.000	0.000	0.000	0.000	0.000	0.000	0.000	0.000	0.000	0.000	0.000	0.000	0.000	32	236	7246	9139	1.518	Error	Error	5371	1875	0	0	6745	2394	0	0	0	0
1	10	12	""	"iYDR141C"	3260	27800	80	2923	2883	1398	107	117	57	100	100	0	1942	1770	763	71	79	32	100	100	0	0	0	0	0	0	0	0	0	0	0	0	0	0	0	0	0	0	0	1.505	1.634	1.611	1.642	1.595	1.738	0.896	0.000	0.000	0.000	0.000	0.000	0.000	0.000	0.000	0.000	0.000	0.000	0.000	0.000	0.000	52	340	4687	4475	0.590	Error	Error	2816	1871	0	0	2776	1699	0	0	0	0
1	11	12	""	"iYDR145W"	3450	27790	70	979	1354	1142	108	122	82	100	90	0	1733	2078	1596	71	87	77	100	100	0	0	0	0	0	0	0	0	0	0	0	0	0	0	0	0	0	0	0	0.524	0.621	0.647	0.595	1.901	0.633	0.778	0.000	0.000	0.000	0.000	0.000	0.000	0.000	0.000	0.000	0.000	0.000	0.000	0.000	0.000	32	236	2533	3253	-0.932	Error	Error	871	1662	0	0	1246	2007	0	0	0	0
1	12	12	""	"iYDR150W"	3650	27800	80	1985	1878	751	109	119	58	98	98	0	4771	4189	1699	71	78	36	100	100	0	0	0	0	0	0	0	0	0	0	0	0	0	0	0	0	0	0	0	0.399	0.430	0.435	0.415	1.664	0.405	0.899	0.000	0.000	0.000	0.000	0.000	0.000	0.000	0.000	0.000	0.000	0.000	0.000	0.000	0.000	52	340	6576	5887	-1.325	Error	Error	1876	4700	0	0	1769	4118	0	0	0	0
1	13	12	""	"iYDR169C-0"	3860	27790	90	3430	5019	4153	103	114	55	100	100	0	3442	4149	3010	68	73	29	100	100	0	0	0	0	0	0	0	0	0	0	0	0	0	0	0	0	0	0	0	0.986	1.205	1.202	1.154	1.459	1.292	0.910	0.000	0.000	0.000	0.000	0.000	0.000	0.000	0.000	0.000	0.000	0.000	0.000	0.000	0.000	52	420	6701	8997	-0.020	Error	Error	3327	3374	0	0	4916	4081	0	0	0	0
1	14	12	""	"iYDR170W-A-0"	4050	27800	80	19862	26845	24973	103	116	61	100	100	11	8840	12467	12366	66	75	35	100	100	0	0	0	0	0	0	0	0	0	0	0	0	0	0	0	0	0	0	0	2.252	2.156	1.954	2.114	1.768	2.134	0.916	0.000	0.000	0.000	0.000	0.000	0.000	0.000	0.000	0.000	0.000	0.000	0.000	0.000	0.000	52	340	28533	39143	1.171	Error	Error	19759	8774	0	0	26742	12401	0	0	0	0
1	15	12	""	"iYDR173C"	4260	27790	60	4169	4488	2564	97	102	46	100	100	0	3313	3411	1897	64	73	45	100	100	0	0	0	0	0	0	0	0	0	0	0	0	0	0	0	0	0	0	0	1.253	1.312	1.276	1.264	1.463	1.323	0.918	0.000	0.000	0.000	0.000	0.000	0.000	0.000	0.000	0.000	0.000	0.000	0.000	0.000	0.000	32	176	7321	7738	0.326	Error	Error	4072	3249	0	0	4391	3347	0	0	0	0
1	16	12	""	"iYDR189W"	4450	27790	70	525	639	340	96	105	55	100	96	0	1248	1492	907	65	85	88	100	96	0	0	0	0	0	0	0	0	0	0	0	0	0	0	0	0	0	0	0	0.363	0.381	0.376	0.399	1.690	0.358	0.846	0.000	0.000	0.000	0.000	0.000	0.000	0.000	0.000	0.000	0.000	0.000	0.000	0.000	0.000	32	236	1612	1970	-1.463	Error	Error	429	1183	0	0	543	1427	0	0	0	0
1	17	12	""	"iYDR194C"	4660	27790	70	2887	3420	2124	93	105	52	100	100	0	1813	1840	1105	61	69	42	100	100	0	0	0	0	0	0	0	0	0	0	0	0	0	0	0	0	0	0	0	1.595	1.870	1.993	1.885	1.336	1.920	0.936	0.000	0.000	0.000	0.000	0.000	0.000	0.000	0.000	0.000	0.000	0.000	0.000	0.000	0.000	32	236	4546	5106	0.673	Error	Error	2794	1752	0	0	3327	1779	0	0	0	0
1	18	12	""	"iYDR198C"	4860	27790	70	1626	1923	1071	96	119	109	100	100	0	1635	1837	960	68	96	154	100	100	0	0	0	0	0	0	0	0	0	0	0	0	0	0	0	0	0	0	0	0.976	1.033	1.062	1.002	1.333	1.059	0.914	0.000	0.000	0.000	0.000	0.000	0.000	0.000	0.000	0.000	0.000	0.000	0.000	0.000	0.000	32	236	3097	3596	-0.034	Error	Error	1530	1567	0	0	1827	1769	0	0	0	0
1	19	12	""	"iYDR214W"	5060	27790	90	303	437	300	97	107	64	84	73	0	354	392	219	65	73	35	98	94	0	0	0	0	0	0	0	0	0	0	0	0	0	0	0	0	0	0	0	0.713	1.040	0.872	0.858	2.206	1.219	0.781	0.000	0.000	0.000	0.000	0.000	0.000	0.000	0.000	0.000	0.000	0.000	0.000	0.000	0.000	52	414	495	667	-0.488	Error	Error	206	289	0	0	340	327	0	0	0	0
1	20	12	""	"iYDR218C"	5270	27790	80	2107	2759	1951	98	103	50	100	100	0	1805	2106	1431	65	71	38	100	100	0	0	0	0	0	0	0	0	0	0	0	0	0	0	0	0	0	0	0	1.155	1.304	1.299	1.340	1.718	1.342	0.925	0.000	0.000	0.000	0.000	0.000	0.000	0.000	0.000	0.000	0.000	0.000	0.000	0.000	0.000	52	340	3749	4702	0.207	Error	Error	2009	1740	0	0	2661	2041	0	0	0	0
1	21	12	""	"iYDR223W"	5460	27790	80	2124	2277	1537	95	99	42	98	98	0	1145	1176	799	63	68	27	96	96	0	0	0	0	0	0	0	0	0	0	0	0	0	0	0	0	0	0	0	1.875	1.960	1.990	2.169	1.750	1.994	0.915	0.000	0.000	0.000	0.000	0.000	0.000	0.000	0.000	0.000	0.000	0.000	0.000	0.000	0.000	52	340	3111	3295	0.907	Error	Error	2029	1082	0	0	2182	1113	0	0	0	0
1	1	13	""	"iYDR532C"	1460	27990	70	320	372	161	126	140	88	81	62	0	286	341	182	77	92	65	96	75	0	0	0	0	0	0	0	0	0	0	0	0	0	0	0	0	0	0	0	0.928	0.932	1.079	1.008	2.571	0.914	0.631	0.000	0.000	0.000	0.000	0.000	0.000	0.000	0.000	0.000	0.000	0.000	0.000	0.000	0.000	32	236	403	510	-0.107	Error	Error	194	209	0	0	246	264	0	0	0	0
1	2	13	""	"iYDR535C"	1650	28000	80	3521	3469	929	123	144	98	100	100	0	1999	1905	456	78	95	65	100	100	0	0	0	0	0	0	0	0	0	0	0	0	0	0	0	0	0	0	0	1.769	1.831	1.835	1.793	1.325	1.919	0.908	0.000	0.000	0.000	0.000	0.000	0.000	0.000	0.000	0.000	0.000	0.000	0.000	0.000	0.000	52	340	5319	5173	0.823	Error	Error	3398	1921	0	0	3346	1827	0	0	0	0
1	3	13	""	"iYDR539W-1"	1860	28000	70	335	373	172	116	128	63	93	84	0	324	370	181	76	86	40	100	96	0	0	0	0	0	0	0	0	0	0	0	0	0	0	0	0	0	0	0	0.883	0.874	0.868	0.889	1.834	0.856	0.531	0.000	0.000	0.000	0.000	0.000	0.000	0.000	0.000	0.000	0.000	0.000	0.000	0.000	0.000	32	236	467	551	-0.179	Error	Error	219	248	0	0	257	294	0	0	0	0
1	4	13	""	"iYEL073C-4"	2060	27990	70	871	943	409	126	138	79	100	100	0	449	489	209	79	93	62	96	96	0	0	0	0	0	0	0	0	0	0	0	0	0	0	0	0	0	0	0	2.014	1.993	1.917	2.063	1.625	2.285	0.746	0.000	0.000	0.000	0.000	0.000	0.000	0.000	0.000	0.000	0.000	0.000	0.000	0.000	0.000	32	236	1115	1227	1.010	Error	Error	745	370	0	0	817	410	0	0	0	0
1	5	13	""	"iYEL071W-1"	2250	27990	70	3711	3654	915	110	149	210	100	100	0	3688	3701	1180	85	154	407	100	100	0	0	0	0	0	0	0	0	0	0	0	0	0	0	0	0	0	0	0	0.999	0.980	0.974	1.009	1.264	0.940	0.903	0.000	0.000	0.000	0.000	0.000	0.000	0.000	0.000	0.000	0.000	0.000	0.000	0.000	0.000	32	236	7204	7160	-0.001	Error	Error	3601	3603	0	0	3544	3616	0	0	0	0
1	6	13	""	"iYEL068C"	2460	27990	70	2551	2386	812	109	125	78	100	100	0	4654	4026	1438	75	92	64	100	100	0	0	0	0	0	0	0	0	0	0	0	0	0	0	0	0	0	0	0	0.533	0.576	0.555	0.576	1.387	0.537	0.854	0.000	0.000	0.000	0.000	0.000	0.000	0.000	0.000	0.000	0.000	0.000	0.000	0.000	0.000	32	236	7021	6228	-0.907	Error	Error	2442	4579	0	0	2277	3951	0	0	0	0
1	7	13	""	"iYEL051W"	2650	27990	70	2160	2176	648	110	131	85	100	100	0	2039	2218	608	82	103	111	100	100	0	0	0	0	0	0	0	0	0	0	0	0	0	0	0	0	0	0	0	1.048	0.967	0.986	0.958	1.318	0.964	0.866	0.000	0.000	0.000	0.000	0.000	0.000	0.000	0.000	0.000	0.000	0.000	0.000	0.000	0.000	32	236	4007	4202	0.067	Error	Error	2050	1957	0	0	2066	2136	0	0	0	0
1	8	13	""	"itG(GCC)E"	2870	27990	70	762	776	418	109	123	62	96	93	0	750	905	737	82	90	40	100	100	0	0	0	0	0	0	0	0	0	0	0	0	0	0	0	0	0	0	0	0.978	0.810	0.843	0.866	2.310	0.616	0.681	0.000	0.000	0.000	0.000	0.000	0.000	0.000	0.000	0.000	0.000	0.000	0.000	0.000	0.000	32	236	1321	1490	-0.033	Error	Error	653	668	0	0	667	823	0	0	0	0
1	9	13	""	"iYEL047C"	3050	28000	80	2012	1937	514	110	120	59	100	98	0	1337	1306	271	74	83	37	100	100	0	0	0	0	0	0	0	0	0	0	0	0	0	0	0	0	0	0	0	1.506	1.483	1.581	1.425	1.442	1.575	0.867	0.000	0.000	0.000	0.000	0.000	0.000	0.000	0.000	0.000	0.000	0.000	0.000	0.000	0.000	52	340	3165	3059	0.591	Error	Error	1902	1263	0	0	1827	1232	0	0	0	0
1	10	13	""	"iYEL029C"	3260	28000	80	4691	4887	1122	102	110	60	100	100	0	4691	4722	753	74	82	32	100	100	0	0	0	0	0	0	0	0	0	0	0	0	0	0	0	0	0	0	0	0.994	1.029	1.030	1.009	1.340	1.052	0.884	0.000	0.000	0.000	0.000	0.000	0.000	0.000	0.000	0.000	0.000	0.000	0.000	0.000	0.000	52	340	9206	9433	-0.009	Error	Error	4589	4617	0	0	4785	4648	0	0	0	0
1	11	13	""	"iYEL027W"	3450	27990	70	3239	3280	1025	99	143	255	100	100	0	4258	4265	1069	75	179	582	100	96	0	0	0	0	0	0	0	0	0	0	0	0	0	0	0	0	0	0	0	0.751	0.759	0.754	0.758	1.344	0.734	0.899	0.000	0.000	0.000	0.000	0.000	0.000	0.000	0.000	0.000	0.000	0.000	0.000	0.000	0.000	32	236	7323	7371	-0.414	Error	Error	3140	4183	0	0	3181	4190	0	0	0	0
1	12	13	""	"iYEL023C"	3660	27990	80	3601	3509	1080	101	112	58	100	100	0	1925	1914	406	69	78	40	100	100	0	0	0	0	0	0	0	0	0	0	0	0	0	0	0	0	0	0	0	1.886	1.847	1.828	1.770	1.486	2.022	0.848	0.000	0.000	0.000	0.000	0.000	0.000	0.000	0.000	0.000	0.000	0.000	0.000	0.000	0.000	52	340	5356	5253	0.915	Error	Error	3500	1856	0	0	3408	1845	0	0	0	0
1	13	13	""	"iYFL031W"	3850	27980	90	2052	2737	2026	107	117	60	100	100	0	1770	1919	1289	67	77	39	100	100	0	0	0	0	0	0	0	0	0	0	0	0	0	0	0	0	0	0	0	1.142	1.420	1.384	1.377	1.440	1.505	0.919	0.000	0.000	0.000	0.000	0.000	0.000	0.000	0.000	0.000	0.000	0.000	0.000	0.000	0.000	52	420	3648	4482	0.192	Error	Error	1945	1703	0	0	2630	1852	0	0	0	0
1	14	13	""	"iYFL027C"	4060	27980	90	3504	3240	886	103	111	57	100	100	0	2599	2440	679	64	73	38	100	100	0	0	0	0	0	0	0	0	0	0	0	0	0	0	0	0	0	0	0	1.342	1.320	1.348	1.326	1.246	1.334	0.933	0.000	0.000	0.000	0.000	0.000	0.000	0.000	0.000	0.000	0.000	0.000	0.000	0.000	0.000	52	414	5936	5513	0.424	Error	Error	3401	2535	0	0	3137	2376	0	0	0	0
1	15	13	""	"iYFL023W"	4260	27980	80	922	950	473	91	100	48	100	98	0	2398	2135	731	63	69	27	100	100	0	0	0	0	0	0	0	0	0	0	0	0	0	0	0	0	0	0	0	0.356	0.415	0.372	0.372	1.493	0.443	0.845	0.000	0.000	0.000	0.000	0.000	0.000	0.000	0.000	0.000	0.000	0.000	0.000	0.000	0.000	52	340	3166	2931	-1.491	Error	Error	831	2335	0	0	859	2072	0	0	0	0
1	16	13	""	"iYFL009W"	4470	27980	70	697	947	741	110	113	62	96	84	0	966	1063	702	65	74	37	100	100	0	0	0	0	0	0	0	0	0	0	0	0	0	0	0	0	0	0	0	0.651	0.839	0.800	0.691	2.013	0.971	0.857	0.000	0.000	0.000	0.000	0.000	0.000	0.000	0.000	0.000	0.000	0.000	0.000	0.000	0.000	32	236	1488	1835	-0.618	Error	Error	587	901	0	0	837	998	0	0	0	0
1	17	13	""	"iYFL005W"	4650	27980	80	3131	3021	1520	94	101	48	100	100	0	6196	5086	2202	64	70	24	100	100	0	0	0	0	0	0	0	0	0	0	0	0	0	0	0	0	0	0	0	0.495	0.583	0.575	0.561	1.400	0.590	0.917	0.000	0.000	0.000	0.000	0.000	0.000	0.000	0.000	0.000	0.000	0.000	0.000	0.000	0.000	52	340	9169	7949	-1.014	Error	Error	3037	6132	0	0	2927	5022	0	0	0	0
1	18	13	""	"iYFLWdelta5"	4860	27980	80	1741	1600	894	96	109	66	96	92	0	5906	5081	2603	64	74	39	100	100	0	0	0	0	0	0	0	0	0	0	0	0	0	0	0	0	0	0	0	0.282	0.300	0.291	0.268	1.624	0.305	0.942	0.000	0.000	0.000	0.000	0.000	0.000	0.000	0.000	0.000	0.000	0.000	0.000	0.000	0.000	52	340	7487	6521	-1.828	Error	Error	1645	5842	0	0	1504	5017	0	0	0	0
1	19	13	""	"iYFR009W"	5060	27970	90	1727	1887	993	98	108	61	100	100	0	3388	2931	1329	67	78	59	100	100	0	0	0	0	0	0	0	0	0	0	0	0	0	0	0	0	0	0	0	0.491	0.625	0.581	0.604	1.353	0.640	0.901	0.000	0.000	0.000	0.000	0.000	0.000	0.000	0.000	0.000	0.000	0.000	0.000	0.000	0.000	52	414	4950	4653	-1.028	Error	Error	1629	3321	0	0	1789	2864	0	0	0	0
1	20	13	""	"iYFR012W"	5250	27980	90	6175	6312	4258	98	103	45	100	100	0	12043	10019	6620	63	72	36	100	100	0	0	0	0	0	0	0	0	0	0	0	0	0	0	0	0	0	0	0	0.507	0.624	0.603	0.617	1.734	0.619	0.943	0.000	0.000	0.000	0.000	0.000	0.000	0.000	0.000	0.000	0.000	0.000	0.000	0.000	0.000	52	420	18057	16170	-0.979	Error	Error	6077	11980	0	0	6214	9956	0	0	0	0
1	21	13	""	"iYFR016C"	5450	27980	80	1386	1306	448	98	106	47	100	100	0	837	842	274	62	69	26	100	100	0	0	0	0	0	0	0	0	0	0	0	0	0	0	0	0	0	0	0	1.662	1.549	1.630	1.532	1.469	1.631	0.845	0.000	0.000	0.000	0.000	0.000	0.000	0.000	0.000	0.000	0.000	0.000	0.000	0.000	0.000	52	340	2063	1988	0.733	Error	Error	1288	775	0	0	1208	780	0	0	0	0
1	1	14	""	"iYFR027W"	1460	28180	80	3289	3854	2281	125	141	81	100	100	0	3105	3323	1473	76	88	54	100	100	0	0	0	0	0	0	0	0	0	0	0	0	0	0	0	0	0	0	0	1.045	1.148	1.128	1.087	1.349	1.262	0.914	0.000	0.000	0.000	0.000	0.000	0.000	0.000	0.000	0.000	0.000	0.000	0.000	0.000	0.000	52	340	6193	6976	0.063	Error	Error	3164	3029	0	0	3729	3247	0	0	0	0
1	2	14	""	"iYFR030W"	1650	28180	90	763	788	326	115	132	83	100	98	0	2294	2240	847	75	89	59	100	100	0	0	0	0	0	0	0	0	0	0	0	0	0	0	0	0	0	0	0	0.292	0.311	0.300	0.298	1.417	0.302	0.854	0.000	0.000	0.000	0.000	0.000	0.000	0.000	0.000	0.000	0.000	0.000	0.000	0.000	0.000	52	414	2867	2838	-1.776	Error	Error	648	2219	0	0	673	2165	0	0	0	0
1	3	14	""	"iYFR032C-A"	1850	28190	80	3486	3620	1684	117	130	75	100	100	0	1729	1582	654	73	83	39	100	100	0	0	0	0	0	0	0	0	0	0	0	0	0	0	0	0	0	0	0	2.034	2.321	2.320	2.300	1.389	2.435	0.926	0.000	0.000	0.000	0.000	0.000	0.000	0.000	0.000	0.000	0.000	0.000	0.000	0.000	0.000	52	340	5025	5012	1.025	Error	Error	3369	1656	0	0	3503	1509	0	0	0	0
1	4	14	""	"iYGL002W"	2060	28190	80	1167	1035	544	122	139	88	96	86	0	7386	6175	2972	75	88	43	100	100	0	0	0	0	0	0	0	0	0	0	0	0	0	0	0	0	0	0	0	0.143	0.150	0.150	0.137	1.665	0.152	0.888	0.000	0.000	0.000	0.000	0.000	0.000	0.000	0.000	0.000	0.000	0.000	0.000	0.000	0.000	52	340	8356	7013	-2.807	Error	Error	1045	7311	0	0	913	6100	0	0	0	0
1	5	14	""	"iYGR002C"	2240	28190	80	981	980	315	119	129	68	100	100	0	3846	3679	1269	79	90	42	100	100	0	0	0	0	0	0	0	0	0	0	0	0	0	0	0	0	0	0	0	0.229	0.239	0.241	0.240	1.308	0.225	0.875	0.000	0.000	0.000	0.000	0.000	0.000	0.000	0.000	0.000	0.000	0.000	0.000	0.000	0.000	52	340	4629	4461	-2.128	Error	Error	862	3767	0	0	861	3600	0	0	0	0
1	6	14	""	"iYGR006W"	2450	28190	80	3221	2881	903	112	123	66	100	100	0	8814	8505	2458	78	94	56	100	100	0	0	0	0	0	0	0	0	0	0	0	0	0	0	0	0	0	0	0	0.356	0.329	0.329	0.322	1.273	0.312	0.909	0.000	0.000	0.000	0.000	0.000	0.000	0.000	0.000	0.000	0.000	0.000	0.000	0.000	0.000	52	340	11845	11196	-1.491	Error	Error	3109	8736	0	0	2769	8427	0	0	0	0
1	7	14	""	"iYGR026W"	2650	28190	90	1510	1432	449	113	123	58	98	98	0	3169	2899	937	87	98	44	100	100	0	0	0	0	0	0	0	0	0	0	0	0	0	0	0	0	0	0	0	0.453	0.469	0.470	0.465	1.491	0.448	0.887	0.000	0.000	0.000	0.000	0.000	0.000	0.000	0.000	0.000	0.000	0.000	0.000	0.000	0.000	52	406	4479	4131	-1.142	Error	Error	1397	3082	0	0	1319	2812	0	0	0	0
1	8	14	""	"iYGR028W"	2840	28190	70	3882	3657	1768	115	138	100	100	96	0	5160	4648	2238	81	113	138	100	100	0	0	0	0	0	0	0	0	0	0	0	0	0	0	0	0	0	0	0	0.742	0.776	0.796	0.758	1.432	0.762	0.939	0.000	0.000	0.000	0.000	0.000	0.000	0.000	0.000	0.000	0.000	0.000	0.000	0.000	0.000	32	236	8846	8109	-0.431	Error	Error	3767	5079	0	0	3542	4567	0	0	0	0
1	9	14	""	"iYGR030C"	3050	28180	90	2259	2525	1310	105	119	59	100	100	0	1247	1474	890	73	81	39	100	100	0	0	0	0	0	0	0	0	0	0	0	0	0	0	0	0	0	0	0	1.835	1.727	1.766	1.877	1.435	1.663	0.929	0.000	0.000	0.000	0.000	0.000	0.000	0.000	0.000	0.000	0.000	0.000	0.000	0.000	0.000	52	414	3328	3821	0.876	Error	Error	2154	1174	0	0	2420	1401	0	0	0	0
1	10	14	""	"iYGR043C-0"	3260	28190	70	1436	1523	945	100	109	53	100	100	0	1654	1649	954	70	74	27	100	100	0	0	0	0	0	0	0	0	0	0	0	0	0	0	0	0	0	0	0	0.843	0.901	0.859	0.880	1.433	0.944	0.881	0.000	0.000	0.000	0.000	0.000	0.000	0.000	0.000	0.000	0.000	0.000	0.000	0.000	0.000	32	236	2920	3002	-0.246	Error	Error	1336	1584	0	0	1423	1579	0	0	0	0
1	11	14	""	"iYGR047C"	3460	28180	80	2637	2799	1025	101	112	56	100	100	0	2511	2526	981	65	76	47	100	100	0	0	0	0	0	0	0	0	0	0	0	0	0	0	0	0	0	0	0	1.037	1.096	1.111	1.110	1.373	1.080	0.877	0.000	0.000	0.000	0.000	0.000	0.000	0.000	0.000	0.000	0.000	0.000	0.000	0.000	0.000	52	340	4982	5159	0.052	Error	Error	2536	2446	0	0	2698	2461	0	0	0	0
1	12	14	""	"iYGR051C"	3650	28190	90	814	882	479	100	112	83	100	96	0	634	653	362	67	76	36	100	100	0	0	0	0	0	0	0	0	0	0	0	0	0	0	0	0	0	0	0	1.259	1.334	1.380	1.356	1.706	1.369	0.851	0.000	0.000	0.000	0.000	0.000	0.000	0.000	0.000	0.000	0.000	0.000	0.000	0.000	0.000	52	420	1281	1368	0.333	Error	Error	714	567	0	0	782	586	0	0	0	0
1	13	14	""	"iYGR067C"	3860	28190	80	915	2156	5484	103	114	76	98	94	0	699	1197	1587	68	75	28	100	100	0	0	0	0	0	0	0	0	0	0	0	0	0	0	0	0	0	0	0	1.287	1.818	1.031	1.132	2.212	4.226	0.483	0.000	0.000	0.000	0.000	0.000	0.000	0.000	0.000	0.000	0.000	0.000	0.000	0.000	0.000	52	340	1443	3182	0.364	Error	Error	812	631	0	0	2053	1129	0	0	0	0
1	14	14	""	"iYGR072W"	4060	28190	70	201	263	149	93	104	55	75	50	0	201	294	203	64	71	30	93	84	0	0	0	0	0	0	0	0	0	0	0	0	0	0	0	0	0	0	0	0.788	0.739	0.797	0.812	2.417	0.750	0.589	0.000	0.000	0.000	0.000	0.000	0.000	0.000	0.000	0.000	0.000	0.000	0.000	0.000	0.000	32	236	245	400	-0.343	Error	Error	108	137	0	0	170	230	0	0	0	0
1	15	14	""	"iYGR078C"	4250	28180	70	2685	2371	852	99	111	95	100	100	0	1830	1684	580	64	80	89	100	100	0	0	0	0	0	0	0	0	0	0	0	0	0	0	0	0	0	0	0	1.464	1.402	1.439	1.415	1.369	1.359	0.889	0.000	0.000	0.000	0.000	0.000	0.000	0.000	0.000	0.000	0.000	0.000	0.000	0.000	0.000	32	236	4352	3892	0.550	Error	Error	2586	1766	0	0	2272	1620	0	0	0	0
1	16	14	""	"iYHR009C"	4460	28180	80	2788	3241	1590	106	109	49	100	100	0	1553	1496	601	64	71	28	100	100	0	0	0	0	0	0	0	0	0	0	0	0	0	0	0	0	0	0	0	1.801	2.189	2.160	2.081	1.330	2.341	0.898	0.000	0.000	0.000	0.000	0.000	0.000	0.000	0.000	0.000	0.000	0.000	0.000	0.000	0.000	52	340	4171	4567	0.849	Error	Error	2682	1489	0	0	3135	1432	0	0	0	0
1	17	14	""	"iYHR013C"	4650	28190	80	2142	2162	1179	98	104	46	100	100	0	3745	3716	1962	65	71	25	100	100	0	0	0	0	0	0	0	0	0	0	0	0	0	0	0	0	0	0	0	0.555	0.565	0.539	0.561	1.629	0.555	0.896	0.000	0.000	0.000	0.000	0.000	0.000	0.000	0.000	0.000	0.000	0.000	0.000	0.000	0.000	52	340	5724	5715	-0.848	Error	Error	2044	3680	0	0	2064	3651	0	0	0	0
1	18	14	""	"iYHRWdelta7"	4860	28190	80	720	726	296	96	106	65	100	96	0	728	667	289	64	72	38	98	98	0	0	0	0	0	0	0	0	0	0	0	0	0	0	0	0	0	0	0	0.940	1.045	1.113	1.095	1.825	1.054	0.813	0.000	0.000	0.000	0.000	0.000	0.000	0.000	0.000	0.000	0.000	0.000	0.000	0.000	0.000	52	340	1288	1233	-0.090	Error	Error	624	664	0	0	630	603	0	0	0	0
1	19	14	""	"iYHR027C"	5070	28190	90	1215	1481	845	102	107	51	100	100	0	816	878	454	66	72	32	100	100	0	0	0	0	0	0	0	0	0	0	0	0	0	0	0	0	0	0	0	1.484	1.698	1.701	1.645	1.468	1.811	0.899	0.000	0.000	0.000	0.000	0.000	0.000	0.000	0.000	0.000	0.000	0.000	0.000	0.000	0.000	52	420	1863	2191	0.569	Error	Error	1113	750	0	0	1379	812	0	0	0	0
1	20	14	""	"iYHR031C"	5260	28190	80	763	1009	624	96	102	46	100	100	0	517	584	336	64	68	24	100	100	0	0	0	0	0	0	0	0	0	0	0	0	0	0	0	0	0	0	0	1.472	1.756	1.746	1.699	1.538	1.848	0.872	0.000	0.000	0.000	0.000	0.000	0.000	0.000	0.000	0.000	0.000	0.000	0.000	0.000	0.000	52	340	1120	1433	0.558	Error	Error	667	453	0	0	913	520	0	0	0	0
1	21	14	""	"iYHR035W"	5460	28180	80	1529	2079	1451	96	103	46	100	98	0	1259	1463	946	59	65	26	100	98	0	0	0	0	0	0	0	0	0	0	0	0	0	0	0	0	0	0	0	1.194	1.412	1.348	1.368	1.689	1.485	0.871	0.000	0.000	0.000	0.000	0.000	0.000	0.000	0.000	0.000	0.000	0.000	0.000	0.000	0.000	52	340	2633	3387	0.256	Error	Error	1433	1200	0	0	1983	1404	0	0	0	0
1	1	15	""	"iYHR048W"	1450	28400	90	1449	1334	504	129	153	136	100	100	0	841	852	357	78	99	95	100	100	0	0	0	0	0	0	0	0	0	0	0	0	0	0	0	0	0	0	0	1.730	1.557	1.646	1.551	1.470	1.987	0.701	0.000	0.000	0.000	0.000	0.000	0.000	0.000	0.000	0.000	0.000	0.000	0.000	0.000	0.000	52	420	2083	1979	0.791	Error	Error	1320	763	0	0	1205	774	0	0	0	0
1	2	15	""	"iYHR052W"	1650	28390	90	2769	4142	3670	117	135	80	100	100	0	6267	8136	6640	77	93	53	100	100	0	0	0	0	0	0	0	0	0	0	0	0	0	0	0	0	0	0	0	0.428	0.499	0.488	0.466	1.541	0.507	0.900	0.000	0.000	0.000	0.000	0.000	0.000	0.000	0.000	0.000	0.000	0.000	0.000	0.000	0.000	52	420	8842	12084	-1.223	Error	Error	2652	6190	0	0	4025	8059	0	0	0	0
1	3	15	""	"iYHR056C"	1850	28390	90	5474	5071	2255	120	134	82	100	100	0	4612	3970	1642	76	90	64	100	100	0	0	0	0	0	0	0	0	0	0	0	0	0	0	0	0	0	0	0	1.180	1.271	1.329	1.262	1.333	1.290	0.904	0.000	0.000	0.000	0.000	0.000	0.000	0.000	0.000	0.000	0.000	0.000	0.000	0.000	0.000	52	420	9890	8845	0.239	Error	Error	5354	4536	0	0	4951	3894	0	0	0	0
1	4	15	""	"itF(GAA)H1"	2060	28400	100	6440	5865	1921	122	136	88	98	98	0	4305	4102	904	79	95	79	100	98	0	0	0	0	0	0	0	0	0	0	0	0	0	0	0	0	0	0	0	1.495	1.428	1.444	1.322	1.482	1.521	0.909	0.000	0.000	0.000	0.000	0.000	0.000	0.000	0.000	0.000	0.000	0.000	0.000	0.000	0.000	80	541	10544	9766	0.580	Error	Error	6318	4226	0	0	5743	4023	0	0	0	0
1	5	15	""	"iYHR075C"	2260	28390	100	4845	4592	1366	114	127	83	100	100	0	9017	8717	1847	76	88	64	100	100	0	0	0	0	0	0	0	0	0	0	0	0	0	0	0	0	0	0	0	0.529	0.518	0.546	0.487	1.467	0.521	0.920	0.000	0.000	0.000	0.000	0.000	0.000	0.000	0.000	0.000	0.000	0.000	0.000	0.000	0.000	80	536	13672	13119	-0.918	Error	Error	4731	8941	0	0	4478	8641	0	0	0	0
1	6	15	""	"iYHR079C"	2460	28400	80	2563	2478	837	110	119	59	98	98	0	2652	2580	577	71	82	40	100	100	0	0	0	0	0	0	0	0	0	0	0	0	0	0	0	0	0	0	0	0.950	0.944	0.917	0.874	1.527	0.973	0.868	0.000	0.000	0.000	0.000	0.000	0.000	0.000	0.000	0.000	0.000	0.000	0.000	0.000	0.000	52	326	5034	4877	-0.073	Error	Error	2453	2581	0	0	2368	2509	0	0	0	0
1	7	15	""	"iYIL013C"	2650	28390	150	119	135	68	114	131	199	3	0	0	80	103	77	76	88	48	19	10	0	0	0	0	0	0	0	0	0	0	0	0	0	0	0	0	0	0	0	1.250	0.778	1.586	1.389	4.001	1.454	0.104	0.000	0.000	0.000	0.000	0.000	0.000	0.000	0.000	0.000	0.000	0.000	0.000	0.000	0.000	156	952	9	48	0.322	Error	Error	5	4	0	0	21	27	0	0	-50	0
1	8	15	""	"iYIL009C-A"	2840	28390	70	911	873	283	111	120	67	100	100	0	1872	1713	539	77	137	451	96	84	0	0	0	0	0	0	0	0	0	0	0	0	0	0	0	0	0	0	0	0.446	0.466	0.486	0.467	1.445	0.417	0.805	0.000	0.000	0.000	0.000	0.000	0.000	0.000	0.000	0.000	0.000	0.000	0.000	0.000	0.000	32	236	2595	2398	-1.166	Error	Error	800	1795	0	0	762	1636	0	0	0	0
1	9	15	""	"iYIL009W"	3050	28390	90	2599	2893	998	111	121	62	100	100	0	8516	8428	1534	80	93	48	100	100	0	0	0	0	0	0	0	0	0	0	0	0	0	0	0	0	0	0	0	0.295	0.333	0.329	0.322	1.359	0.335	0.879	0.000	0.000	0.000	0.000	0.000	0.000	0.000	0.000	0.000	0.000	0.000	0.000	0.000	0.000	52	420	10924	11130	-1.762	Error	Error	2488	8436	0	0	2782	8348	0	0	0	0
1	10	15	""	"itE(UUC)I"	3260	28380	70	693	715	272	106	120	69	96	96	0	1478	1301	405	71	81	40	100	100	0	0	0	0	0	0	0	0	0	0	0	0	0	0	0	0	0	0	0	0.417	0.495	0.539	0.500	1.476	0.511	0.787	0.000	0.000	0.000	0.000	0.000	0.000	0.000	0.000	0.000	0.000	0.000	0.000	0.000	0.000	32	236	1994	1839	-1.261	Error	Error	587	1407	0	0	609	1230	0	0	0	0
1	11	15	""	"iYIR010W"	3470	28380	70	369	545	363	101	112	59	93	78	0	1207	1713	1220	68	80	54	100	100	0	0	0	0	0	0	0	0	0	0	0	0	0	0	0	0	0	0	0	0.235	0.270	0.273	0.227	2.104	0.256	0.774	0.000	0.000	0.000	0.000	0.000	0.000	0.000	0.000	0.000	0.000	0.000	0.000	0.000	0.000	32	236	1407	2089	-2.087	Error	Error	268	1139	0	0	444	1645	0	0	0	0
1	12	15	""	"iYIR014W"	3660	28380	70	1027	1067	323	104	121	105	100	100	0	1054	1017	286	71	81	53	100	100	0	0	0	0	0	0	0	0	0	0	0	0	0	0	0	0	0	0	0	0.939	1.018	1.004	1.009	1.442	1.037	0.846	0.000	0.000	0.000	0.000	0.000	0.000	0.000	0.000	0.000	0.000	0.000	0.000	0.000	0.000	32	236	1906	1909	-0.091	Error	Error	923	983	0	0	963	946	0	0	0	0
1	13	15	""	"iYIR026C"	3870	28380	60	1593	1619	637	99	116	88	100	96	0	2993	2593	887	73	80	34	100	100	0	0	0	0	0	0	0	0	0	0	0	0	0	0	0	0	0	0	0	0.512	0.603	0.575	0.586	1.409	0.594	0.862	0.000	0.000	0.000	0.000	0.000	0.000	0.000	0.000	0.000	0.000	0.000	0.000	0.000	0.000	32	176	4414	4040	-0.967	Error	Error	1494	2920	0	0	1520	2520	0	0	0	0
1	14	15	""	"iYIR030C"	4060	28380	70	1111	1090	404	109	116	56	96	96	0	1868	1702	573	69	85	91	100	96	0	0	0	0	0	0	0	0	0	0	0	0	0	0	0	0	0	0	0	0.557	0.601	0.601	0.574	1.447	0.608	0.836	0.000	0.000	0.000	0.000	0.000	0.000	0.000	0.000	0.000	0.000	0.000	0.000	0.000	0.000	32	236	2801	2614	-0.844	Error	Error	1002	1799	0	0	981	1633	0	0	0	0
1	15	15	""	"iYIR034C"	4260	28380	80	1421	1445	495	98	110	55	100	100	0	1994	1999	539	69	75	29	100	98	0	0	0	0	0	0	0	0	0	0	0	0	0	0	0	0	0	0	0	0.687	0.698	0.647	0.710	1.584	0.679	0.788	0.000	0.000	0.000	0.000	0.000	0.000	0.000	0.000	0.000	0.000	0.000	0.000	0.000	0.000	52	340	3248	3277	-0.541	Error	Error	1323	1925	0	0	1347	1930	0	0	0	0
1	16	15	""	"iYJL223C-0"	4450	28380	90	10510	10370	1650	103	112	56	100	100	0	9959	9524	1725	74	101	205	100	100	0	0	0	0	0	0	0	0	0	0	0	0	0	0	0	0	0	0	0	1.053	1.086	1.062	1.100	1.289	1.043	0.924	0.000	0.000	0.000	0.000	0.000	0.000	0.000	0.000	0.000	0.000	0.000	0.000	0.000	0.000	52	420	20292	19717	0.074	Error	Error	10407	9885	0	0	10267	9450	0	0	0	0
1	17	15	""	"iYJL219W"	4650	28380	90	2962	3058	846	101	110	53	100	100	0	2920	2745	712	71	82	68	100	100	0	0	0	0	0	0	0	0	0	0	0	0	0	0	0	0	0	0	0	1.004	1.106	1.089	1.140	1.463	1.076	0.896	0.000	0.000	0.000	0.000	0.000	0.000	0.000	0.000	0.000	0.000	0.000	0.000	0.000	0.000	52	420	5710	5631	0.006	Error	Error	2861	2849	0	0	2957	2674	0	0	0	0
1	18	15	""	"iYJL215C"	4860	28390	70	1123	1192	587	101	118	88	100	100	0	1254	1229	542	66	81	72	100	100	0	0	0	0	0	0	0	0	0	0	0	0	0	0	0	0	0	0	0	0.860	0.938	0.938	0.917	1.580	0.991	0.882	0.000	0.000	0.000	0.000	0.000	0.000	0.000	0.000	0.000	0.000	0.000	0.000	0.000	0.000	32	236	2210	2254	-0.217	Error	Error	1022	1188	0	0	1091	1163	0	0	0	0
1	19	15	""	"iYJR093C"	5050	28380	80	1287	1247	473	104	112	53	98	98	0	2107	1881	744	64	70	28	98	98	0	0	0	0	0	0	0	0	0	0	0	0	0	0	0	0	0	0	0	0.579	0.629	0.635	0.687	1.756	0.598	0.856	0.000	0.000	0.000	0.000	0.000	0.000	0.000	0.000	0.000	0.000	0.000	0.000	0.000	0.000	52	340	3226	2960	-0.788	Error	Error	1183	2043	0	0	1143	1817	0	0	0	0
1	20	15	""	"iYJR095W"	5260	28380	80	2043	2034	546	93	104	47	100	100	0	1546	1484	431	64	68	22	100	100	0	0	0	0	0	0	0	0	0	0	0	0	0	0	0	0	0	0	0	1.316	1.367	1.387	1.420	1.394	1.383	0.863	0.000	0.000	0.000	0.000	0.000	0.000	0.000	0.000	0.000	0.000	0.000	0.000	0.000	0.000	52	340	3432	3361	0.396	Error	Error	1950	1482	0	0	1941	1420	0	0	0	0
1	21	15	""	"iYJR099W"	5460	28390	70	803	1170	817	103	113	67	96	90	0	999	1254	1029	62	68	32	100	100	0	0	0	0	0	0	0	0	0	0	0	0	0	0	0	0	0	0	0	0.747	0.895	0.840	0.812	2.191	0.811	0.681	0.000	0.000	0.000	0.000	0.000	0.000	0.000	0.000	0.000	0.000	0.000	0.000	0.000	0.000	32	236	1637	2259	-0.421	Error	Error	700	937	0	0	1067	1192	0	0	0	0
1	1	16	""	"iYJR115W"	1460	28610	120	1984	2033	1734	123	142	87	75	71	0	1009	1001	800	75	106	159	67	62	0	0	0	0	0	0	0	0	0	0	0	0	0	0	0	0	0	0	0	1.993	2.063	2.091	1.857	2.644	2.243	0.712	0.000	0.000	0.000	0.000	0.000	0.000	0.000	0.000	0.000	0.000	0.000	0.000	0.000	0.000	120	710	2795	2836	0.995	Error	Error	1861	934	0	0	1910	926	0	0	0	0
1	2	16	""	"iYJR119C"	1650	28590	70	1571	1616	631	112	138	107	100	100	0	1615	1569	694	78	115	164	100	96	0	0	0	0	0	0	0	0	0	0	0	0	0	0	0	0	0	0	0	0.949	1.009	1.012	1.042	1.319	0.982	0.867	0.000	0.000	0.000	0.000	0.000	0.000	0.000	0.000	0.000	0.000	0.000	0.000	0.000	0.000	32	236	2996	2995	-0.075	Error	Error	1459	1537	0	0	1504	1491	0	0	0	0
1	3	16	""	"iYJR123W"	1860	28590	70	1687	1568	666	119	146	114	100	100	0	5732	5013	1911	80	107	152	100	100	0	0	0	0	0	0	0	0	0	0	0	0	0	0	0	0	0	0	0	0.277	0.294	0.299	0.282	1.317	0.292	0.897	0.000	0.000	0.000	0.000	0.000	0.000	0.000	0.000	0.000	0.000	0.000	0.000	0.000	0.000	32	236	7220	6382	-1.850	Error	Error	1568	5652	0	0	1449	4933	0	0	0	0
1	4	16	""	"iYJR140C"	2060	28600	80	1246	1240	470	128	148	104	100	98	0	1101	1057	362	78	97	89	100	98	0	0	0	0	0	0	0	0	0	0	0	0	0	0	0	0	0	0	0	1.093	1.136	1.090	1.132	1.555	1.222	0.761	0.000	0.000	0.000	0.000	0.000	0.000	0.000	0.000	0.000	0.000	0.000	0.000	0.000	0.000	52	340	2141	2091	0.128	Error	Error	1118	1023	0	0	1112	979	0	0	0	0
1	5	16	""	"iYJR144W"	2260	28590	70	1878	1929	753	112	124	83	100	100	0	1890	1660	495	75	87	55	100	100	0	0	0	0	0	0	0	0	0	0	0	0	0	0	0	0	0	0	0	0.973	1.146	1.057	1.116	1.320	1.183	0.870	0.000	0.000	0.000	0.000	0.000	0.000	0.000	0.000	0.000	0.000	0.000	0.000	0.000	0.000	32	236	3581	3402	-0.039	Error	Error	1766	1815	0	0	1817	1585	0	0	0	0
1	6	16	""	"iYJR149W"	2460	28590	80	1988	1983	680	109	121	60	98	98	0	3144	2901	865	73	84	41	100	100	0	0	0	0	0	0	0	0	0	0	0	0	0	0	0	0	0	0	0	0.612	0.663	0.638	0.619	1.855	0.648	0.889	0.000	0.000	0.000	0.000	0.000	0.000	0.000	0.000	0.000	0.000	0.000	0.000	0.000	0.000	52	340	4950	4702	-0.709	Error	Error	1879	3071	0	0	1874	2828	0	0	0	0
1	7	16	""	"iYJR159W"	2650	28600	80	6403	6549	1232	115	131	70	100	100	0	4300	4218	721	82	98	61	100	100	0	0	0	0	0	0	0	0	0	0	0	0	0	0	0	0	0	0	0	1.491	1.556	1.568	1.554	1.254	1.566	0.893	0.000	0.000	0.000	0.000	0.000	0.000	0.000	0.000	0.000	0.000	0.000	0.000	0.000	0.000	52	340	10506	10570	0.576	Error	Error	6288	4218	0	0	6434	4136	0	0	0	0
1	8	16	""	"iYKL225W"	2850	28590	110	19015	17818	5354	114	137	244	100	100	0	18814	16859	5968	89	119	268	100	98	0	0	0	0	0	0	0	0	0	0	0	0	0	0	0	0	0	0	0	1.009	1.056	1.036	1.177	1.703	1.087	0.826	0.000	0.000	0.000	0.000	0.000	0.000	0.000	0.000	0.000	0.000	0.000	0.000	0.000	0.000	80	621	37626	34474	0.013	Error	Error	18901	18725	0	0	17704	16770	0	0	0	0
1	9	16	""	"iYKL221W-0"	3050	28590	90	2115	2180	472	117	129	65	100	100	0	2876	2755	634	89	112	83	100	100	0	0	0	0	0	0	0	0	0	0	0	0	0	0	0	0	0	0	0	0.717	0.774	0.718	0.790	1.415	0.734	0.898	0.000	0.000	0.000	0.000	0.000	0.000	0.000	0.000	0.000	0.000	0.000	0.000	0.000	0.000	52	420	4785	4729	-0.480	Error	Error	1998	2787	0	0	2063	2666	0	0	0	0
1	10	16	""	"iYKR062W"	3250	28600	80	643	703	314	110	117	52	98	98	0	906	957	454	73	81	37	100	100	0	0	0	0	0	0	0	0	0	0	0	0	0	0	0	0	0	0	0	0.640	0.671	0.723	0.696	1.548	0.643	0.835	0.000	0.000	0.000	0.000	0.000	0.000	0.000	0.000	0.000	0.000	0.000	0.000	0.000	0.000	52	340	1366	1477	-0.644	Error	Error	533	833	0	0	593	884	0	0	0	0
1	11	16	""	"iYKR066C"	3450	28590	90	3648	3763	605	102	113	61	100	100	0	2536	2498	483	72	82	41	100	100	0	0	0	0	0	0	0	0	0	0	0	0	0	0	0	0	0	0	0	1.439	1.509	1.511	1.540	1.377	1.468	0.897	0.000	0.000	0.000	0.000	0.000	0.000	0.000	0.000	0.000	0.000	0.000	0.000	0.000	0.000	52	420	6010	6087	0.525	Error	Error	3546	2464	0	0	3661	2426	0	0	0	0
1	12	16	""	"iYKR070W"	3650	28590	90	1086	1105	399	101	112	53	100	100	0	4098	3658	1161	74	82	37	100	100	0	0	0	0	0	0	0	0	0	0	0	0	0	0	0	0	0	0	0	0.245	0.280	0.280	0.277	1.370	0.279	0.851	0.000	0.000	0.000	0.000	0.000	0.000	0.000	0.000	0.000	0.000	0.000	0.000	0.000	0.000	52	420	5009	4588	-2.030	Error	Error	985	4024	0	0	1004	3584	0	0	0	0
1	13	16	""	"iYKR084C"	3850	28600	80	1721	1660	602	105	117	63	100	100	0	1449	1360	392	71	81	41	100	100	0	0	0	0	0	0	0	0	0	0	0	0	0	0	0	0	0	0	0	1.173	1.206	1.224	1.179	1.475	1.234	0.861	0.000	0.000	0.000	0.000	0.000	0.000	0.000	0.000	0.000	0.000	0.000	0.000	0.000	0.000	52	340	2994	2844	0.230	Error	Error	1616	1378	0	0	1555	1289	0	0	0	0
1	14	16	""	"iYKR088C"	4050	28590	70	1327	1249	416	113	141	145	100	96	0	1496	1421	424	70	115	218	100	93	0	0	0	0	0	0	0	0	0	0	0	0	0	0	0	0	0	0	0	0.851	0.841	0.826	0.831	1.271	0.870	0.851	0.000	0.000	0.000	0.000	0.000	0.000	0.000	0.000	0.000	0.000	0.000	0.000	0.000	0.000	32	236	2640	2487	-0.232	Error	Error	1214	1426	0	0	1136	1351	0	0	0	0
1	15	16	""	"iYKR092C-0"	4250	28590	90	4090	4224	876	111	121	68	100	100	0	1565	1543	258	70	82	66	100	100	0	0	0	0	0	0	0	0	0	0	0	0	0	0	0	0	0	0	0	2.662	2.792	2.907	2.791	1.358	2.877	0.877	0.000	0.000	0.000	0.000	0.000	0.000	0.000	0.000	0.000	0.000	0.000	0.000	0.000	0.000	52	420	5474	5586	1.412	Error	Error	3979	1495	0	0	4113	1473	0	0	0	0
1	16	16	""	"iYKR103W"	4450	28590	60	1221	1148	446	116	158	239	100	87	0	1367	1270	459	75	128	227	100	93	0	0	0	0	0	0	0	0	0	0	0	0	0	0	0	0	0	0	0	0.855	0.864	0.825	0.852	1.499	0.857	0.689	0.000	0.000	0.000	0.000	0.000	0.000	0.000	0.000	0.000	0.000	0.000	0.000	0.000	0.000	32	176	2397	2227	-0.226	Error	Error	1105	1292	0	0	1032	1195	0	0	0	0
1	17	16	""	"iYKR106W-1"	4650	28590	90	5409	5212	823	104	119	126	100	100	0	4424	4274	811	73	102	250	100	100	0	0	0	0	0	0	0	0	0	0	0	0	0	0	0	0	0	0	0	1.219	1.216	1.201	1.231	1.333	1.193	0.897	0.000	0.000	0.000	0.000	0.000	0.000	0.000	0.000	0.000	0.000	0.000	0.000	0.000	0.000	52	420	9656	9309	0.286	Error	Error	5305	4351	0	0	5108	4201	0	0	0	0
1	18	16	""	"iYLL066C-1"	4830	28590	70	54110	49005	16209	121	2583	10818	100	96	28	33260	29461	13223	83	1946	7611	90	81	0	0	0	0	0	0	0	0	0	0	0	0	0	0	0	0	0	0	0	1.627	1.664	1.560	1.926	1.848	1.509	0.923	0.000	0.000	0.000	0.000	0.000	0.000	0.000	0.000	0.000	0.000	0.000	0.000	0.000	0.000	32	236	87166	78262	0.702	Error	Error	53989	33177	0	0	48884	29378	0	0	0	0
1	19	16	""	"iYLL050C"	5050	28590	90	1354	1341	323	104	109	53	100	100	0	1024	969	287	64	74	39	100	100	0	0	0	0	0	0	0	0	0	0	0	0	0	0	0	0	0	0	0	1.302	1.367	1.364	1.409	1.433	1.315	0.879	0.000	0.000	0.000	0.000	0.000	0.000	0.000	0.000	0.000	0.000	0.000	0.000	0.000	0.000	52	420	2210	2142	0.381	Error	Error	1250	960	0	0	1237	905	0	0	0	0
1	20	16	""	"iYLL044W"	5260	28590	100	4486	4125	1398	101	110	54	98	98	0	2398	2161	787	65	73	40	98	97	0	0	0	0	0	0	0	0	0	0	0	0	0	0	0	0	0	0	0	1.880	1.920	1.922	2.011	1.726	1.950	0.898	0.000	0.000	0.000	0.000	0.000	0.000	0.000	0.000	0.000	0.000	0.000	0.000	0.000	0.000	80	543	6718	6120	0.910	Error	Error	4385	2333	0	0	4024	2096	0	0	0	0
1	21	16	""	"iYLL040C"	5470	28590	100	1406	1310	518	102	111	73	98	96	0	686	663	246	66	71	27	97	96	0	0	0	0	0	0	0	0	0	0	0	0	0	0	0	0	0	0	0	2.103	2.023	2.071	2.013	1.732	2.128	0.859	0.000	0.000	0.000	0.000	0.000	0.000	0.000	0.000	0.000	0.000	0.000	0.000	0.000	0.000	80	550	1924	1805	1.073	Error	Error	1304	620	0	0	1208	597	0	0	0	0
1	1	17	""	"iYLR267W"	1450	28800	100	1430	2749	2641	132	148	95	98	98	0	1179	1882	1694	79	117	190	92	82	0	0	0	0	0	0	0	0	0	0	0	0	0	0	0	0	0	0	0	1.180	1.451	1.412	1.454	1.965	1.534	0.935	0.000	0.000	0.000	0.000	0.000	0.000	0.000	0.000	0.000	0.000	0.000	0.000	0.000	0.000	80	484	2398	4420	0.239	Error	Error	1298	1100	0	0	2617	1803	0	0	0	0
1	2	17	""	"itV(AAC)L"	1650	28790	80	915	1042	626	130	147	93	98	94	0	796	907	561	76	89	52	100	100	0	0	0	0	0	0	0	0	0	0	0	0	0	0	0	0	0	0	0	1.090	1.097	1.086	1.084	1.561	1.130	0.879	0.000	0.000	0.000	0.000	0.000	0.000	0.000	0.000	0.000	0.000	0.000	0.000	0.000	0.000	52	340	1505	1743	0.125	Error	Error	785	720	0	0	912	831	0	0	0	0
1	3	17	""	"iYLR275W"	1850	28790	80	778	869	477	121	139	101	98	96	0	1517	2014	1225	76	87	56	98	96	0	0	0	0	0	0	0	0	0	0	0	0	0	0	0	0	0	0	0	0.456	0.386	0.375	0.412	1.652	0.368	0.864	0.000	0.000	0.000	0.000	0.000	0.000	0.000	0.000	0.000	0.000	0.000	0.000	0.000	0.000	52	340	2098	2686	-1.133	Error	Error	657	1441	0	0	748	1938	0	0	0	0
1	4	17	""	"iYLR293C"	2060	28790	80	1544	1584	1114	126	142	108	94	84	0	525	673	465	73	87	62	98	86	0	0	0	0	0	0	0	0	0	0	0	0	0	0	0	0	0	0	0	3.137	2.430	2.280	2.074	2.213	2.576	0.852	0.000	0.000	0.000	0.000	0.000	0.000	0.000	0.000	0.000	0.000	0.000	0.000	0.000	0.000	52	340	1870	2058	1.649	Error	Error	1418	452	0	0	1458	600	0	0	0	0
1	5	17	""	"iYLR298C"	2250	28790	100	3446	3348	1708	107	120	67	100	97	0	1208	1111	595	72	80	42	93	90	0	0	0	0	0	0	0	0	0	0	0	0	0	0	0	0	0	0	0	2.939	3.119	3.249	3.376	1.638	3.175	0.910	0.000	0.000	0.000	0.000	0.000	0.000	0.000	0.000	0.000	0.000	0.000	0.000	0.000	0.000	80	540	4475	4280	1.555	Error	Error	3339	1136	0	0	3241	1039	0	0	0	0
1	6	17	""	"iYLRCdelta18"	2460	28800	60	435	527	284	109	131	139	87	56	0	669	667	355	76	103	226	84	59	0	0	0	0	0	0	0	0	0	0	0	0	0	0	0	0	0	0	0	0.550	0.707	0.795	0.728	1.759	0.721	0.748	0.000	0.000	0.000	0.000	0.000	0.000	0.000	0.000	0.000	0.000	0.000	0.000	0.000	0.000	32	176	919	1009	-0.863	Error	Error	326	593	0	0	418	591	0	0	0	0
1	7	17	""	"iYLR318W"	2650	28790	70	412	484	231	120	134	87	96	78	0	818	885	527	77	96	102	96	84	0	0	0	0	0	0	0	0	0	0	0	0	0	0	0	0	0	0	0	0.394	0.450	0.473	0.482	1.712	0.402	0.713	0.000	0.000	0.000	0.000	0.000	0.000	0.000	0.000	0.000	0.000	0.000	0.000	0.000	0.000	32	236	1033	1172	-1.344	Error	Error	292	741	0	0	364	808	0	0	0	0
1	8	17	""	"iYLR323C"	2850	28790	70	2161	2049	532	110	152	216	100	100	0	1714	1738	546	80	128	250	100	96	0	0	0	0	0	0	0	0	0	0	0	0	0	0	0	0	0	0	0	1.255	1.169	1.240	1.195	1.306	1.117	0.866	0.000	0.000	0.000	0.000	0.000	0.000	0.000	0.000	0.000	0.000	0.000	0.000	0.000	0.000	32	236	3685	3597	0.328	Error	Error	2051	1634	0	0	1939	1658	0	0	0	0
1	9	17	""	"iYLR327C"	3050	28790	80	4633	4517	2138	115	122	58	100	100	0	1758	1728	696	73	84	37	100	100	0	0	0	0	0	0	0	0	0	0	0	0	0	0	0	0	0	0	0	2.681	2.660	2.614	2.568	1.350	2.805	0.910	0.000	0.000	0.000	0.000	0.000	0.000	0.000	0.000	0.000	0.000	0.000	0.000	0.000	0.000	52	340	6203	6057	1.423	Error	Error	4518	1685	0	0	4402	1655	0	0	0	0
1	10	17	""	"iYLR338W"	3260	28790	80	1337	1582	985	106	116	56	100	100	0	595	747	375	72	80	32	100	100	0	0	0	0	0	0	0	0	0	0	0	0	0	0	0	0	0	0	0	2.354	2.187	2.012	2.034	1.443	2.393	0.899	0.000	0.000	0.000	0.000	0.000	0.000	0.000	0.000	0.000	0.000	0.000	0.000	0.000	0.000	52	340	1754	2151	1.235	Error	Error	1231	523	0	0	1476	675	0	0	0	0
1	11	17	""	"iYLR343W"	3460	28790	90	1998	2317	1200	99	112	62	100	100	0	2657	2943	1339	73	79	32	100	100	0	0	0	0	0	0	0	0	0	0	0	0	0	0	0	0	0	0	0	0.735	0.773	0.730	0.760	1.332	0.768	0.877	0.000	0.000	0.000	0.000	0.000	0.000	0.000	0.000	0.000	0.000	0.000	0.000	0.000	0.000	52	420	4483	5088	-0.444	Error	Error	1899	2584	0	0	2218	2870	0	0	0	0
1	12	17	""	"iYLR345W"	3670	28790	90	1304	1359	591	106	116	58	100	100	0	4715	4524	2017	73	82	36	100	100	0	0	0	0	0	0	0	0	0	0	0	0	0	0	0	0	0	0	0	0.258	0.282	0.295	0.282	1.408	0.275	0.897	0.000	0.000	0.000	0.000	0.000	0.000	0.000	0.000	0.000	0.000	0.000	0.000	0.000	0.000	52	420	5840	5704	-1.954	Error	Error	1198	4642	0	0	1253	4451	0	0	0	0
1	13	17	""	"iYMR044W"	3880	28790	70	4216	4179	2378	123	181	353	100	96	0	7567	7385	3519	83	173	558	100	100	0	0	0	0	0	0	0	0	0	0	0	0	0	0	0	0	0	0	0	0.547	0.555	0.541	0.512	1.403	0.572	0.920	0.000	0.000	0.000	0.000	0.000	0.000	0.000	0.000	0.000	0.000	0.000	0.000	0.000	0.000	32	236	11577	11358	-0.871	Error	Error	4093	7484	0	0	4056	7302	0	0	0	0
1	14	17	""	"iYMR048W"	4060	28800	70	2983	2983	1307	109	121	57	100	100	0	4005	3772	1631	77	87	54	100	100	0	0	0	0	0	0	0	0	0	0	0	0	0	0	0	0	0	0	0	0.732	0.778	0.748	0.754	1.508	0.771	0.894	0.000	0.000	0.000	0.000	0.000	0.000	0.000	0.000	0.000	0.000	0.000	0.000	0.000	0.000	32	236	6802	6569	-0.451	Error	Error	2874	3928	0	0	2874	3695	0	0	0	0
1	15	17	""	"iYMRCdelta10"	4260	28790	60	657	788	484	118	129	65	93	90	0	985	949	564	73	83	42	100	100	0	0	0	0	0	0	0	0	0	0	0	0	0	0	0	0	0	0	0	0.591	0.765	0.836	0.703	1.901	0.794	0.848	0.000	0.000	0.000	0.000	0.000	0.000	0.000	0.000	0.000	0.000	0.000	0.000	0.000	0.000	32	176	1451	1546	-0.759	Error	Error	539	912	0	0	670	876	0	0	0	0
1	16	17	""	"iYMR067C"	4470	28780	70	3601	3175	1418	105	124	89	100	100	0	3526	3160	1259	74	91	86	100	100	0	0	0	0	0	0	0	0	0	0	0	0	0	0	0	0	0	0	0	1.013	0.995	0.977	0.953	1.250	1.004	0.933	0.000	0.000	0.000	0.000	0.000	0.000	0.000	0.000	0.000	0.000	0.000	0.000	0.000	0.000	32	236	6948	6156	0.018	Error	Error	3496	3452	0	0	3070	3086	0	0	0	0
1	17	17	""	"iYMR071C"	4660	28800	90	1455	1647	974	105	113	54	100	100	0	1968	2098	1131	71	76	32	100	100	0	0	0	0	0	0	0	0	0	0	0	0	0	0	0	0	0	0	0	0.712	0.761	0.739	0.715	1.539	0.781	0.917	0.000	0.000	0.000	0.000	0.000	0.000	0.000	0.000	0.000	0.000	0.000	0.000	0.000	0.000	52	414	3247	3569	-0.491	Error	Error	1350	1897	0	0	1542	2027	0	0	0	0
1	18	17	""	"iYMR075C-A"	4860	28780	90	1441	1682	966	106	114	54	100	100	0	4162	4848	2503	71	78	35	100	100	0	0	0	0	0	0	0	0	0	0	0	0	0	0	0	0	0	0	0	0.326	0.330	0.321	0.312	1.357	0.334	0.899	0.000	0.000	0.000	0.000	0.000	0.000	0.000	0.000	0.000	0.000	0.000	0.000	0.000	0.000	52	420	5426	6353	-1.616	Error	Error	1335	4091	0	0	1576	4777	0	0	0	0
1	19	17	""	"iYMR090W"	5060	28780	80	988	1298	998	105	113	59	92	90	0	1009	1260	962	67	73	30	94	92	0	0	0	0	0	0	0	0	0	0	0	0	0	0	0	0	0	0	0	0.937	1.000	1.040	1.136	2.084	1.020	0.898	0.000	0.000	0.000	0.000	0.000	0.000	0.000	0.000	0.000	0.000	0.000	0.000	0.000	0.000	52	340	1825	2386	-0.093	Error	Error	883	942	0	0	1193	1193	0	0	0	0
1	20	17	""	"iYMR095C"	5270	28770	70	1768	2358	1847	108	120	67	100	100	0	2058	3107	2605	70	81	49	100	100	0	0	0	0	0	0	0	0	0	0	0	0	0	0	0	0	0	0	0	0.835	0.741	0.682	0.761	1.763	0.711	0.910	0.000	0.000	0.000	0.000	0.000	0.000	0.000	0.000	0.000	0.000	0.000	0.000	0.000	0.000	32	236	3648	5287	-0.260	Error	Error	1660	1988	0	0	2250	3037	0	0	0	0
1	21	17	""	"iYMRCdelta13"	5480	28780	70	656	1037	925	107	123	101	84	62	0	546	907	762	69	76	42	100	90	0	0	0	0	0	0	0	0	0	0	0	0	0	0	0	0	0	0	0	1.151	1.110	1.009	0.921	2.038	1.213	0.801	0.000	0.000	0.000	0.000	0.000	0.000	0.000	0.000	0.000	0.000	0.000	0.000	0.000	0.000	32	236	1026	1768	0.203	Error	Error	549	477	0	0	930	838	0	0	0	0
1	1	18	""	"iYMR111C"	1460	28990	90	3313	2972	1038	123	137	101	100	100	0	2433	2321	798	79	88	45	100	100	0	0	0	0	0	0	0	0	0	0	0	0	0	0	0	0	0	0	0	1.355	1.271	1.297	1.275	1.355	1.272	0.895	0.000	0.000	0.000	0.000	0.000	0.000	0.000	0.000	0.000	0.000	0.000	0.000	0.000	0.000	52	400	5544	5091	0.438	Error	Error	3190	2354	0	0	2849	2242	0	0	0	0
1	2	18	""	"iYMR115W"	1660	29000	150	147	201	268	126	150	121	17	7	0	99	149	123	78	95	67	32	16	0	0	0	0	0	0	0	0	0	0	0	0	0	0	0	0	0	0	0	1.000	1.056	1.211	1.456	4.234	4.078	0.137	0.000	0.000	0.000	0.000	0.000	0.000	0.000	0.000	0.000	0.000	0.000	0.000	0.000	0.000	156	966	42	146	0.000	Error	Error	21	21	0	0	75	71	0	0	-50	0
1	3	18	""	"iYMRWdelta16"	1870	28990	70	2257	2657	1778	124	158	156	100	96	0	1805	1764	977	78	100	77	100	100	0	0	0	0	0	0	0	0	0	0	0	0	0	0	0	0	0	0	0	1.235	1.502	1.358	1.339	1.532	1.675	0.864	0.000	0.000	0.000	0.000	0.000	0.000	0.000	0.000	0.000	0.000	0.000	0.000	0.000	0.000	32	236	3860	4219	0.305	Error	Error	2133	1727	0	0	2533	1686	0	0	0	0
1	4	18	""	"iYNL258C"	2070	28990	90	1413	1390	444	115	131	76	100	100	0	1364	1270	333	73	82	41	100	100	0	0	0	0	0	0	0	0	0	0	0	0	0	0	0	0	0	0	0	1.005	1.065	1.058	1.043	1.403	1.108	0.860	0.000	0.000	0.000	0.000	0.000	0.000	0.000	0.000	0.000	0.000	0.000	0.000	0.000	0.000	52	420	2589	2472	0.008	Error	Error	1298	1291	0	0	1275	1197	0	0	0	0
1	5	18	""	"iYNL254C"	2260	28990	90	5016	4549	2364	108	123	66	100	100	0	4180	3750	1733	69	78	41	100	100	0	0	0	0	0	0	0	0	0	0	0	0	0	0	0	0	0	0	0	1.194	1.206	1.186	1.147	1.410	1.247	0.933	0.000	0.000	0.000	0.000	0.000	0.000	0.000	0.000	0.000	0.000	0.000	0.000	0.000	0.000	52	420	9019	8122	0.256	Error	Error	4908	4111	0	0	4441	3681	0	0	0	0
1	6	18	""	"iYNL249C"	2460	29000	100	614	989	896	111	134	117	92	77	0	534	876	804	72	89	135	91	75	0	0	0	0	0	0	0	0	0	0	0	0	0	0	0	0	0	0	0	1.089	1.092	1.022	1.025	2.301	1.108	0.894	0.000	0.000	0.000	0.000	0.000	0.000	0.000	0.000	0.000	0.000	0.000	0.000	0.000	0.000	80	534	965	1682	0.123	Error	Error	503	462	0	0	878	804	0	0	0	0
1	7	18	""	"iYNL231C"	2660	29000	100	919	1046	488	114	125	61	98	98	0	778	855	389	75	84	64	100	97	0	0	0	0	0	0	0	0	0	0	0	0	0	0	0	0	0	0	0	1.145	1.195	1.154	1.183	1.479	1.222	0.905	0.000	0.000	0.000	0.000	0.000	0.000	0.000	0.000	0.000	0.000	0.000	0.000	0.000	0.000	80	526	1508	1712	0.195	Error	Error	805	703	0	0	932	780	0	0	0	0
1	8	18	""	"iYNL225C"	2850	29000	80	979	1416	1051	114	131	84	98	98	0	773	962	610	78	97	91	100	98	0	0	0	0	0	0	0	0	0	0	0	0	0	0	0	0	0	0	0	1.245	1.473	1.361	1.338	1.643	1.623	0.864	0.000	0.000	0.000	0.000	0.000	0.000	0.000	0.000	0.000	0.000	0.000	0.000	0.000	0.000	52	340	1560	2186	0.316	Error	Error	865	695	0	0	1302	884	0	0	0	0
1	9	18	""	"iYNL221C"	3050	29000	90	4502	4305	1988	111	125	78	100	100	0	2056	2058	808	76	84	37	100	100	0	0	0	0	0	0	0	0	0	0	0	0	0	0	0	0	0	0	0	2.218	2.116	2.119	2.048	1.346	2.246	0.907	0.000	0.000	0.000	0.000	0.000	0.000	0.000	0.000	0.000	0.000	0.000	0.000	0.000	0.000	52	420	6371	6176	1.149	Error	Error	4391	1980	0	0	4194	1982	0	0	0	0
1	10	18	""	"iYNL202W"	3260	29000	90	420	683	507	106	115	55	98	90	0	683	885	662	73	81	32	100	100	0	0	0	0	0	0	0	0	0	0	0	0	0	0	0	0	0	0	0	0.515	0.711	0.710	0.668	1.665	0.719	0.869	0.000	0.000	0.000	0.000	0.000	0.000	0.000	0.000	0.000	0.000	0.000	0.000	0.000	0.000	52	420	924	1389	-0.958	Error	Error	314	610	0	0	577	812	0	0	0	0
1	11	18	""	"iYNL197C"	3460	28990	90	3599	3901	2151	100	109	54	100	100	0	1571	1562	784	71	78	33	100	100	0	0	0	0	0	0	0	0	0	0	0	0	0	0	0	0	0	0	0	2.333	2.549	2.388	2.545	1.543	2.697	0.903	0.000	0.000	0.000	0.000	0.000	0.000	0.000	0.000	0.000	0.000	0.000	0.000	0.000	0.000	52	420	4999	5292	1.222	Error	Error	3499	1500	0	0	3801	1491	0	0	0	0
1	12	18	""	"iYNL193W"	3660	28990	90	2402	2339	520	105	115	65	100	100	0	1201	1156	270	74	84	43	100	100	0	0	0	0	0	0	0	0	0	0	0	0	0	0	0	0	0	0	0	2.038	2.065	2.057	2.065	1.276	2.112	0.903	0.000	0.000	0.000	0.000	0.000	0.000	0.000	0.000	0.000	0.000	0.000	0.000	0.000	0.000	52	420	3424	3316	1.027	Error	Error	2297	1127	0	0	2234	1082	0	0	0	0
1	13	18	""	"iYNL176C"	3870	29000	80	4275	4348	2068	107	116	75	100	100	0	1639	1574	664	70	78	37	100	100	0	0	0	0	0	0	0	0	0	0	0	0	0	0	0	0	0	0	0	2.656	2.820	2.823	2.734	1.425	3.026	0.885	0.000	0.000	0.000	0.000	0.000	0.000	0.000	0.000	0.000	0.000	0.000	0.000	0.000	0.000	52	340	5737	5745	1.410	Error	Error	4168	1569	0	0	4241	1504	0	0	0	0
1	14	18	""	"iYNL168C"	4060	28990	90	2787	2810	1136	106	114	52	100	100	0	2289	2169	808	69	77	30	100	100	0	0	0	0	0	0	0	0	0	0	0	0	0	0	0	0	0	0	0	1.208	1.288	1.255	1.267	1.397	1.327	0.894	0.000	0.000	0.000	0.000	0.000	0.000	0.000	0.000	0.000	0.000	0.000	0.000	0.000	0.000	52	420	4901	4804	0.272	Error	Error	2681	2220	0	0	2704	2100	0	0	0	0
1	15	18	""	"iYNL164C"	4260	28990	90	2044	2755	1876	104	122	73	100	98	0	1813	2250	1433	70	80	41	100	100	0	0	0	0	0	0	0	0	0	0	0	0	0	0	0	0	0	0	0	1.113	1.216	1.154	1.174	1.723	1.252	0.911	0.000	0.000	0.000	0.000	0.000	0.000	0.000	0.000	0.000	0.000	0.000	0.000	0.000	0.000	52	420	3683	4831	0.154	Error	Error	1940	1743	0	0	2651	2180	0	0	0	0
1	16	18	""	"iYOL113W"	4460	28980	100	924	906	284	109	120	64	100	97	0	845	769	281	70	84	136	95	88	0	0	0	0	0	0	0	0	0	0	0	0	0	0	0	0	0	0	0	1.052	1.140	1.110	1.165	1.672	1.130	0.812	0.000	0.000	0.000	0.000	0.000	0.000	0.000	0.000	0.000	0.000	0.000	0.000	0.000	0.000	80	554	1590	1496	0.073	Error	Error	815	775	0	0	797	699	0	0	0	0
1	17	18	""	"iYOL109W"	4670	28980	80	316	379	217	108	119	62	82	67	0	388	402	209	72	79	34	98	94	0	0	0	0	0	0	0	0	0	0	0	0	0	0	0	0	0	0	0	0.658	0.821	0.770	0.666	2.275	0.918	0.677	0.000	0.000	0.000	0.000	0.000	0.000	0.000	0.000	0.000	0.000	0.000	0.000	0.000	0.000	52	340	524	601	-0.603	Error	Error	208	316	0	0	271	330	0	0	0	0
1	18	18	""	"iYOLCdelta3"	4880	28980	70	946	1083	818	108	122	62	93	87	0	1345	1515	975	71	83	46	100	100	0	0	0	0	0	0	0	0	0	0	0	0	0	0	0	0	0	0	0	0.658	0.675	0.637	0.532	2.192	0.729	0.855	0.000	0.000	0.000	0.000	0.000	0.000	0.000	0.000	0.000	0.000	0.000	0.000	0.000	0.000	32	236	2112	2419	-0.604	Error	Error	838	1274	0	0	975	1444	0	0	0	0
1	19	18	""	"iYOL092W"	5060	28990	80	573	620	304	103	116	62	98	96	0	518	547	283	73	80	37	98	96	0	0	0	0	0	0	0	0	0	0	0	0	0	0	0	0	0	0	0	1.056	1.091	1.183	1.150	1.800	1.109	0.786	0.000	0.000	0.000	0.000	0.000	0.000	0.000	0.000	0.000	0.000	0.000	0.000	0.000	0.000	52	340	915	991	0.079	Error	Error	470	445	0	0	517	474	0	0	0	0
1	20	18	""	"iYOL088C"	5260	28980	80	1186	1868	1565	109	117	53	98	96	0	921	1357	1159	70	79	37	98	96	0	0	0	0	0	0	0	0	0	0	0	0	0	0	0	0	0	0	0	1.266	1.367	1.387	1.374	1.741	1.369	0.894	0.000	0.000	0.000	0.000	0.000	0.000	0.000	0.000	0.000	0.000	0.000	0.000	0.000	0.000	52	340	1928	3046	0.340	Error	Error	1077	851	0	0	1759	1287	0	0	0	0
1	21	18	""	"iYOL084W"	5470	28980	90	1172	2065	1628	116	126	71	100	100	0	750	1149	790	73	84	53	100	100	0	0	0	0	0	0	0	0	0	0	0	0	0	0	0	0	0	0	0	1.560	1.811	1.641	1.627	1.606	1.967	0.922	0.000	0.000	0.000	0.000	0.000	0.000	0.000	0.000	0.000	0.000	0.000	0.000	0.000	0.000	52	420	1733	3025	0.641	Error	Error	1056	677	0	0	1949	1076	0	0	0	0
1	1	19	""	"iYOL067C"	1460	29190	90	1342	1348	433	110	120	61	100	100	0	1116	1092	360	75	85	46	100	98	0	0	0	0	0	0	0	0	0	0	0	0	0	0	0	0	0	0	0	1.183	1.217	1.248	1.252	1.503	1.204	0.856	0.000	0.000	0.000	0.000	0.000	0.000	0.000	0.000	0.000	0.000	0.000	0.000	0.000	0.000	52	420	2273	2255	0.243	Error	Error	1232	1041	0	0	1238	1017	0	0	0	0
1	2	19	""	"iYOL063C"	1660	29200	100	1120	1336	761	126	143	85	97	96	0	836	872	494	76	91	52	97	92	0	0	0	0	0	0	0	0	0	0	0	0	0	0	0	0	0	0	0	1.308	1.520	1.547	1.558	1.593	1.570	0.878	0.000	0.000	0.000	0.000	0.000	0.000	0.000	0.000	0.000	0.000	0.000	0.000	0.000	0.000	80	506	1754	2006	0.387	Error	Error	994	760	0	0	1210	796	0	0	0	0
1	3	19	""	"iYOL059W"	1860	29200	90	5199	5610	2765	126	153	116	100	100	0	2331	2179	955	78	97	68	100	100	0	0	0	0	0	0	0	0	0	0	0	0	0	0	0	0	0	0	0	2.252	2.610	2.505	2.536	1.334	2.755	0.925	0.000	0.000	0.000	0.000	0.000	0.000	0.000	0.000	0.000	0.000	0.000	0.000	0.000	0.000	52	420	7326	7585	1.171	Error	Error	5073	2253	0	0	5484	2101	0	0	0	0
1	4	19	""	"iYOL045W"	2060	29200	90	1528	1496	383	114	135	89	100	100	0	3121	2883	684	75	86	52	100	100	0	0	0	0	0	0	0	0	0	0	0	0	0	0	0	0	0	0	0	0.464	0.492	0.492	0.490	1.268	0.485	0.902	0.000	0.000	0.000	0.000	0.000	0.000	0.000	0.000	0.000	0.000	0.000	0.000	0.000	0.000	52	420	4460	4190	-1.107	Error	Error	1414	3046	0	0	1382	2808	0	0	0	0
1	5	19	""	"iYOL041C"	2260	29200	80	909	1115	639	113	126	69	100	100	0	892	856	421	72	84	45	100	100	0	0	0	0	0	0	0	0	0	0	0	0	0	0	0	0	0	0	0	0.971	1.278	1.229	1.256	1.462	1.375	0.868	0.000	0.000	0.000	0.000	0.000	0.000	0.000	0.000	0.000	0.000	0.000	0.000	0.000	0.000	52	340	1616	1786	-0.043	Error	Error	796	820	0	0	1002	784	0	0	0	0
1	6	19	""	"iYOL035C"	2470	29200	90	1671	1823	961	110	122	68	100	100	0	1195	1163	573	71	83	52	100	98	0	0	0	0	0	0	0	0	0	0	0	0	0	0	0	0	0	0	0	1.389	1.569	1.575	1.556	1.580	1.627	0.893	0.000	0.000	0.000	0.000	0.000	0.000	0.000	0.000	0.000	0.000	0.000	0.000	0.000	0.000	52	420	2685	2805	0.474	Error	Error	1561	1124	0	0	1713	1092	0	0	0	0
1	7	19	""	"iYOR260W"	2670	29200	90	1033	1334	940	107	118	63	98	96	0	1886	2265	1501	70	78	37	100	100	0	0	0	0	0	0	0	0	0	0	0	0	0	0	0	0	0	0	0	0.510	0.559	0.582	0.553	1.712	0.458	0.764	0.000	0.000	0.000	0.000	0.000	0.000	0.000	0.000	0.000	0.000	0.000	0.000	0.000	0.000	52	414	2742	3422	-0.972	Error	Error	926	1816	0	0	1227	2195	0	0	0	0
1	8	19	""	"iYOR265W"	2850	29200	80	1798	1702	521	107	120	70	100	100	0	2618	2565	806	74	88	72	100	100	0	0	0	0	0	0	0	0	0	0	0	0	0	0	0	0	0	0	0	0.665	0.640	0.648	0.633	1.356	0.620	0.882	0.000	0.000	0.000	0.000	0.000	0.000	0.000	0.000	0.000	0.000	0.000	0.000	0.000	0.000	52	340	4235	4086	-0.589	Error	Error	1691	2544	0	0	1595	2491	0	0	0	0
1	9	19	""	"iYOR269W"	3060	29200	90	943	1023	463	107	114	55	100	100	0	1885	1991	886	71	79	36	100	100	0	0	0	0	0	0	0	0	0	0	0	0	0	0	0	0	0	0	0	0.461	0.477	0.467	0.470	1.476	0.458	0.866	0.000	0.000	0.000	0.000	0.000	0.000	0.000	0.000	0.000	0.000	0.000	0.000	0.000	0.000	52	420	2650	2836	-1.118	Error	Error	836	1814	0	0	916	1920	0	0	0	0
1	10	19	""	"iYOR287C"	3270	29190	70	1898	1827	514	110	133	136	100	100	0	2990	2719	652	72	96	124	100	100	0	0	0	0	0	0	0	0	0	0	0	0	0	0	0	0	0	0	0	0.613	0.649	0.676	0.636	1.314	0.641	0.878	0.000	0.000	0.000	0.000	0.000	0.000	0.000	0.000	0.000	0.000	0.000	0.000	0.000	0.000	32	236	4706	4364	-0.707	Error	Error	1788	2918	0	0	1717	2647	0	0	0	0
1	11	19	""	"iYOR290C"	3470	29200	90	2477	2999	2065	104	111	58	100	100	0	1078	1272	734	67	74	28	100	100	0	0	0	0	0	0	0	0	0	0	0	0	0	0	0	0	0	0	0	2.347	2.402	2.190	2.194	1.603	2.679	0.871	0.000	0.000	0.000	0.000	0.000	0.000	0.000	0.000	0.000	0.000	0.000	0.000	0.000	0.000	52	420	3384	4100	1.231	Error	Error	2373	1011	0	0	2895	1205	0	0	0	0
1	12	19	""	"iYOR294W"	3660	29200	80	2184	2332	1159	103	116	60	100	100	0	1685	1872	966	67	77	35	100	100	0	0	0	0	0	0	0	0	0	0	0	0	0	0	0	0	0	0	0	1.286	1.235	1.195	1.230	1.523	1.221	0.899	0.000	0.000	0.000	0.000	0.000	0.000	0.000	0.000	0.000	0.000	0.000	0.000	0.000	0.000	52	340	3699	4034	0.363	Error	Error	2081	1618	0	0	2229	1805	0	0	0	0
1	13	19	""	"iYOR311C"	3870	29200	80	1432	1669	1099	104	115	63	100	100	0	794	885	526	65	73	36	100	100	0	0	0	0	0	0	0	0	0	0	0	0	0	0	0	0	0	0	0	1.822	1.909	1.823	1.799	1.446	2.051	0.888	0.000	0.000	0.000	0.000	0.000	0.000	0.000	0.000	0.000	0.000	0.000	0.000	0.000	0.000	52	340	2057	2385	0.865	Error	Error	1328	729	0	0	1565	820	0	0	0	0
1	14	19	""	"iYOR315W"	4060	29200	80	1105	1558	1169	106	118	67	98	98	0	1332	1653	1186	68	76	35	100	100	0	0	0	0	0	0	0	0	0	0	0	0	0	0	0	0	0	0	0	0.790	0.916	0.945	0.871	1.557	0.943	0.912	0.000	0.000	0.000	0.000	0.000	0.000	0.000	0.000	0.000	0.000	0.000	0.000	0.000	0.000	52	340	2263	3037	-0.339	Error	Error	999	1264	0	0	1452	1585	0	0	0	0
1	15	19	""	"iYOR318C"	4260	29190	90	3016	3047	909	112	126	70	100	100	0	2934	2841	761	74	84	40	100	100	0	0	0	0	0	0	0	0	0	0	0	0	0	0	0	0	0	0	0	1.015	1.061	1.043	1.082	1.562	1.066	0.878	0.000	0.000	0.000	0.000	0.000	0.000	0.000	0.000	0.000	0.000	0.000	0.000	0.000	0.000	52	420	5764	5702	0.022	Error	Error	2904	2860	0	0	2935	2767	0	0	0	0
1	16	19	""	"iYOR337W"	4470	29200	80	1072	1226	736	107	232	1515	26	0	0	1215	1408	751	75	115	319	96	78	0	0	0	0	0	0	0	0	0	0	0	0	0	0	0	0	0	0	0	0.846	0.839	0.820	0.781	1.501	4.926	0.259	0.000	0.000	0.000	0.000	0.000	0.000	0.000	0.000	0.000	0.000	0.000	0.000	0.000	0.000	52	340	2105	2452	-0.240	Error	Error	965	1140	0	0	1119	1333	0	0	0	0
1	17	19	""	"iYOR341W"	4670	29190	70	2304	3039	2250	114	125	72	100	100	0	5215	6449	4332	81	97	71	100	100	0	0	0	0	0	0	0	0	0	0	0	0	0	0	0	0	0	0	0	0.427	0.459	0.405	0.409	1.449	0.466	0.900	0.000	0.000	0.000	0.000	0.000	0.000	0.000	0.000	0.000	0.000	0.000	0.000	0.000	0.000	32	236	7324	9293	-1.229	Error	Error	2190	5134	0	0	2925	6368	0	0	0	0
1	18	19	""	"iYORWdelta24"	4880	29200	80	803	842	313	114	124	65	100	100	0	1245	1243	367	77	84	37	100	100	0	0	0	0	0	0	0	0	0	0	0	0	0	0	0	0	0	0	0	0.590	0.624	0.606	0.604	1.535	0.640	0.775	0.000	0.000	0.000	0.000	0.000	0.000	0.000	0.000	0.000	0.000	0.000	0.000	0.000	0.000	52	334	1857	1894	-0.761	Error	Error	689	1168	0	0	728	1166	0	0	0	0
1	19	19	""	"iYPL030W"	5050	29190	80	1806	1754	645	115	127	74	100	100	0	1321	1147	445	75	92	80	98	96	0	0	0	0	0	0	0	0	0	0	0	0	0	0	0	0	0	0	0	1.357	1.529	1.426	1.608	1.662	1.566	0.842	0.000	0.000	0.000	0.000	0.000	0.000	0.000	0.000	0.000	0.000	0.000	0.000	0.000	0.000	52	334	2937	2711	0.441	Error	Error	1691	1246	0	0	1639	1072	0	0	0	0
1	20	19	""	"iYPL026C"	5260	29200	80	1530	1586	931	110	128	66	100	100	0	1167	1184	602	73	84	45	100	100	0	0	0	0	0	0	0	0	0	0	0	0	0	0	0	0	0	0	0	1.298	1.329	1.354	1.221	1.540	1.399	0.869	0.000	0.000	0.000	0.000	0.000	0.000	0.000	0.000	0.000	0.000	0.000	0.000	0.000	0.000	52	340	2514	2587	0.376	Error	Error	1420	1094	0	0	1476	1111	0	0	0	0
1	21	19	""	"iYPL022W"	5450	29190	70	3042	3341	2138	116	144	211	100	93	0	6418	6765	4037	81	159	526	100	100	0	0	0	0	0	0	0	0	0	0	0	0	0	0	0	0	0	0	0	0.462	0.482	0.469	0.447	1.478	0.461	0.900	0.000	0.000	0.000	0.000	0.000	0.000	0.000	0.000	0.000	0.000	0.000	0.000	0.000	0.000	32	236	9263	9909	-1.115	Error	Error	2926	6337	0	0	3225	6684	0	0	0	0
1	1	20	""	"iYPL005W"	1450	29400	80	1085	1202	684	113	125	68	100	98	0	6674	7882	4521	79	90	50	100	100	0	0	0	0	0	0	0	0	0	0	0	0	0	0	0	0	0	0	0	0.147	0.140	0.142	0.132	1.505	0.136	0.907	0.000	0.000	0.000	0.000	0.000	0.000	0.000	0.000	0.000	0.000	0.000	0.000	0.000	0.000	52	320	7567	8892	-2.762	Error	Error	972	6595	0	0	1089	7803	0	0	0	0
1	2	20	""	"iYPL001W"	1660	29400	90	222	306	187	121	137	75	63	42	0	657	1072	972	74	89	55	98	92	0	0	0	0	0	0	0	0	0	0	0	0	0	0	0	0	0	0	0	0.173	0.185	0.169	0.186	2.786	0.138	0.366	0.000	0.000	0.000	0.000	0.000	0.000	0.000	0.000	0.000	0.000	0.000	0.000	0.000	0.000	52	420	684	1183	-2.529	Error	Error	101	583	0	0	185	998	0	0	0	0
1	3	20	""	"itF(GAA)P1"	1860	29390	80	907	1308	901	120	143	105	96	92	0	2337	2904	1929	77	92	65	100	100	0	0	0	0	0	0	0	0	0	0	0	0	0	0	0	0	0	0	0	0.348	0.420	0.424	0.404	1.726	0.412	0.854	0.000	0.000	0.000	0.000	0.000	0.000	0.000	0.000	0.000	0.000	0.000	0.000	0.000	0.000	52	340	3047	4015	-1.522	Error	Error	787	2260	0	0	1188	2827	0	0	0	0
1	4	20	""	"iYPR013C-1"	2050	29400	80	3545	3685	2356	110	129	90	100	100	0	1828	1702	976	69	82	45	100	98	0	0	0	0	0	0	0	0	0	0	0	0	0	0	0	0	0	0	0	1.953	2.189	2.106	2.165	1.605	2.322	0.925	0.000	0.000	0.000	0.000	0.000	0.000	0.000	0.000	0.000	0.000	0.000	0.000	0.000	0.000	52	340	5194	5208	0.966	Error	Error	3435	1759	0	0	3575	1633	0	0	0	0
1	5	20	""	"iYPR016C"	2240	29400	50	782	859	344	119	142	69	100	100	0	610	660	342	75	95	56	100	91	0	0	0	0	0	0	0	0	0	0	0	0	0	0	0	0	0	0	0	1.239	1.265	1.339	1.394	1.468	1.133	0.870	0.000	0.000	0.000	0.000	0.000	0.000	0.000	0.000	0.000	0.000	0.000	0.000	0.000	0.000	12	104	1198	1325	0.309	Error	Error	663	535	0	0	740	585	0	0	0	0
1	6	20	""	"iYPR020W"	2470	29400	90	575	631	322	113	123	62	94	90	0	1976	2255	1199	72	81	45	100	98	0	0	0	0	0	0	0	0	0	0	0	0	0	0	0	0	0	0	0	0.243	0.237	0.235	0.225	1.680	0.232	0.857	0.000	0.000	0.000	0.000	0.000	0.000	0.000	0.000	0.000	0.000	0.000	0.000	0.000	0.000	52	420	2366	2701	-2.043	Error	Error	462	1904	0	0	518	2183	0	0	0	0
1	7	20	""	"iYPR035W"	2660	29400	80	650	820	507	114	218	1282	15	0	0	484	542	295	71	114	549	38	0	0	0	0	0	0	0	0	0	0	0	0	0	0	0	0	0	0	0	0	1.298	1.499	1.524	1.378	1.668	1.603	0.782	0.000	0.000	0.000	0.000	0.000	0.000	0.000	0.000	0.000	0.000	0.000	0.000	0.000	0.000	52	340	949	1177	0.376	Error	Error	536	413	0	0	706	471	0	0	0	0
1	8	20	""	"iYPR042C"	2850	29400	80	2648	2575	917	119	221	1281	90	50	0	1689	1591	633	72	117	548	90	71	0	0	0	0	0	0	0	0	0	0	0	0	0	0	0	0	0	0	0	1.564	1.617	1.638	1.728	1.556	1.586	0.888	0.000	0.000	0.000	0.000	0.000	0.000	0.000	0.000	0.000	0.000	0.000	0.000	0.000	0.000	52	340	4146	3975	0.645	Error	Error	2529	1617	0	0	2456	1519	0	0	0	0
1	9	20	""	"iYPR047W"	3050	29400	80	1961	1955	715	112	117	59	100	100	0	1994	1843	745	71	80	41	100	100	0	0	0	0	0	0	0	0	0	0	0	0	0	0	0	0	0	0	0	0.962	1.040	1.013	1.080	1.558	0.993	0.902	0.000	0.000	0.000	0.000	0.000	0.000	0.000	0.000	0.000	0.000	0.000	0.000	0.000	0.000	52	340	3772	3615	-0.057	Error	Error	1849	1923	0	0	1843	1772	0	0	0	0
1	10	20	""	"iYCL001W-A"	3260	29390	70	2255	2082	744	102	115	65	100	100	0	18787	16825	5067	79	212	799	100	100	0	0	0	0	0	0	0	0	0	0	0	0	0	0	0	0	0	0	0	0.115	0.118	0.122	0.114	1.301	0.113	0.914	0.000	0.000	0.000	0.000	0.000	0.000	0.000	0.000	0.000	0.000	0.000	0.000	0.000	0.000	32	236	20861	18726	-3.119	Error	Error	2153	18708	0	0	1980	16746	0	0	0	0
1	11	20	""	"iYCL007C"	3460	29420	80	647	694	654	108	117	54	82	75	0	943	921	649	71	78	34	94	84	0	0	0	0	0	0	0	0	0	0	0	0	0	0	0	0	0	0	0	0.618	0.689	0.608	0.704	2.148	0.787	0.575	0.000	0.000	0.000	0.000	0.000	0.000	0.000	0.000	0.000	0.000	0.000	0.000	0.000	0.000	52	327	1411	1436	-0.694	Error	Error	539	872	0	0	586	850	0	0	0	0
1	12	20	""	"iYCL012W"	3660	29390	70	2064	1938	1173	108	125	73	100	96	0	10734	13201	8118	73	173	594	100	96	0	0	0	0	0	0	0	0	0	0	0	0	0	0	0	0	0	0	0	0.183	0.139	0.132	0.134	1.446	0.131	0.922	0.000	0.000	0.000	0.000	0.000	0.000	0.000	0.000	0.000	0.000	0.000	0.000	0.000	0.000	32	236	12617	14958	-2.446	Error	Error	1956	10661	0	0	1830	13128	0	0	0	0
1	13	20	""	"iYCR011C"	3870	29400	70	883	1122	807	114	120	63	100	93	0	874	982	626	66	73	29	100	100	0	0	0	0	0	0	0	0	0	0	0	0	0	0	0	0	0	0	0	0.952	1.100	0.981	0.966	1.659	1.197	0.869	0.000	0.000	0.000	0.000	0.000	0.000	0.000	0.000	0.000	0.000	0.000	0.000	0.000	0.000	32	236	1577	1924	-0.071	Error	Error	769	808	0	0	1008	916	0	0	0	0
1	14	20	""	"iYCRCdelta6-A"	4060	29390	60	828	827	515	101	115	62	96	90	0	908	939	676	71	83	51	100	96	0	0	0	0	0	0	0	0	0	0	0	0	0	0	0	0	0	0	0	0.869	0.836	0.828	0.883	1.771	0.790	0.866	0.000	0.000	0.000	0.000	0.000	0.000	0.000	0.000	0.000	0.000	0.000	0.000	0.000	0.000	32	176	1564	1594	-0.203	Error	Error	727	837	0	0	726	868	0	0	0	0
1	15	20	""	"iYHR210C-A"	4260	29400	90	7687	6712	3129	114	127	74	100	100	0	5360	4656	2095	73	83	37	100	100	0	0	0	0	0	0	0	0	0	0	0	0	0	0	0	0	0	0	0	1.432	1.440	1.435	1.406	1.393	1.456	0.938	0.000	0.000	0.000	0.000	0.000	0.000	0.000	0.000	0.000	0.000	0.000	0.000	0.000	0.000	52	420	12860	11181	0.518	Error	Error	7573	5287	0	0	6598	4583	0	0	0	0
1	16	20	""	"iYHRCdelta14-C"	4460	29390	70	6076	7108	5579	118	126	56	100	100	0	5963	7106	5168	74	88	53	100	100	0	0	0	0	0	0	0	0	0	0	0	0	0	0	0	0	0	0	0	1.012	0.994	0.854	0.890	1.712	1.029	0.859	0.000	0.000	0.000	0.000	0.000	0.000	0.000	0.000	0.000	0.000	0.000	0.000	0.000	0.000	32	236	11847	14022	0.017	Error	Error	5958	5889	0	0	6990	7032	0	0	0	0
1	17	20	""	"iYHRCdelta16-B"	4660	29390	80	4887	6408	5039	110	125	86	100	100	0	3242	3688	2837	73	85	74	100	100	0	0	0	0	0	0	0	0	0	0	0	0	0	0	0	0	0	0	0	1.507	1.742	1.670	1.714	1.789	1.798	0.917	0.000	0.000	0.000	0.000	0.000	0.000	0.000	0.000	0.000	0.000	0.000	0.000	0.000	0.000	52	340	7946	9913	0.592	Error	Error	4777	3169	0	0	6298	3615	0	0	0	0
1	18	20	""	"iYLR157C-A"	4870	29390	80	14298	12094	6084	114	139	167	100	100	0	8356	7069	3637	77	100	189	100	100	0	0	0	0	0	0	0	0	0	0	0	0	0	0	0	0	0	0	0	1.713	1.713	1.680	1.648	1.796	1.748	0.901	0.000	0.000	0.000	0.000	0.000	0.000	0.000	0.000	0.000	0.000	0.000	0.000	0.000	0.000	52	340	22463	18972	0.777	Error	Error	14184	8279	0	0	11980	6992	0	0	0	0
1	19	20	""	"tE(UUC)C"	5070	29390	80	236	234	89	118	133	68	73	38	0	205	224	87	80	166	1342	0	0	0	0	0	0	0	0	0	0	0	0	0	0	0	0	0	0	0	0	0	0.944	0.806	0.902	0.903	2.423	1.050	0.281	0.000	0.000	0.000	0.000	0.000	0.000	0.000	0.000	0.000	0.000	0.000	0.000	0.000	0.000	52	340	243	260	-0.083	Error	Error	118	125	0	0	116	144	0	0	0	0
1	20	20	""	"tQ(UUG)L"	5270	29390	80	711	726	352	115	129	62	100	98	0	649	723	363	74	156	1343	1	0	0	0	0	0	0	0	0	0	0	0	0	0	0	0	0	0	0	0	0	1.037	0.941	0.981	0.953	1.820	0.964	0.785	0.000	0.000	0.000	0.000	0.000	0.000	0.000	0.000	0.000	0.000	0.000	0.000	0.000	0.000	52	340	1171	1260	0.052	Error	Error	596	575	0	0	611	649	0	0	0	0
1	21	20	""	"YHRCTy1-1B"	5460	29390	90	32080	34685	25403	120	133	76	100	100	26	14262	21515	19133	76	91	66	100	100	1	0	0	0	0	0	0	0	0	0	0	0	0	0	0	0	0	0	0	2.253	1.612	1.382	1.621	1.867	1.549	0.820	0.000	0.000	0.000	0.000	0.000	0.000	0.000	0.000	0.000	0.000	0.000	0.000	0.000	0.000	52	420	46146	56004	1.172	Error	Error	31960	14186	0	0	34565	21439	0	0	0	0
2	1	1	"VPS8"	"YAL002W"	5890	25520	80	5398	5787	3030	99	107	51	100	100	0	20890	21327	10061	67	74	30	100	100	0	0	0	0	0	0	0	0	0	0	0	0	0	0	0	0	0	0	0	0.254	0.268	0.265	0.253	1.443	0.266	0.922	0.000	0.000	0.000	0.000	0.000	0.000	0.000	0.000	0.000	0.000	0.000	0.000	0.000	0.000	52	312	26122	26948	-1.974	Error	Error	5299	20823	0	0	5688	21260	0	0	0	0
2	2	1	"MTW1"	"YAL034W-A"	6060	25520	70	6029	5435	1822	104	117	102	100	100	0	16480	15650	4766	67	153	726	100	100	0	0	0	0	0	0	0	0	0	0	0	0	0	0	0	0	0	0	0	0.361	0.342	0.334	0.325	1.569	0.312	0.880	0.000	0.000	0.000	0.000	0.000	0.000	0.000	0.000	0.000	0.000	0.000	0.000	0.000	0.000	32	236	22338	20914	-1.470	Error	Error	5925	16413	0	0	5331	15583	0	0	0	0
2	3	1	""	"YAL065C-A"	6260	25520	70	11418	10266	3317	101	110	52	100	100	0	8267	7461	2313	68	75	40	100	100	0	0	0	0	0	0	0	0	0	0	0	0	0	0	0	0	0	0	0	1.380	1.375	1.353	1.349	1.337	1.362	0.902	0.000	0.000	0.000	0.000	0.000	0.000	0.000	0.000	0.000	0.000	0.000	0.000	0.000	0.000	32	236	19516	17558	0.465	Error	Error	11317	8199	0	0	10165	7393	0	0	0	0
2	4	1	""	"YAL004W"	6470	25520	60	8071	7459	3890	110	253	1458	87	81	0	6323	5324	2591	72	82	79	100	100	0	0	0	0	0	0	0	0	0	0	0	0	0	0	0	0	0	0	0	1.274	1.399	1.398	1.255	1.663	1.391	0.867	0.000	0.000	0.000	0.000	0.000	0.000	0.000	0.000	0.000	0.000	0.000	0.000	0.000	0.000	32	170	14212	12601	0.349	Error	Error	7961	6251	0	0	7349	5252	0	0	0	0
2	5	1	"FUN12"	"YAL035W"	6670	25520	60	9206	8537	4719	108	107	48	96	96	0	7638	7771	4145	69	73	28	100	100	0	0	0	0	0	0	0	0	0	0	0	0	0	0	0	0	0	0	0	1.202	1.094	1.018	0.869	2.470	1.109	0.800	0.000	0.000	0.000	0.000	0.000	0.000	0.000	0.000	0.000	0.000	0.000	0.000	0.000	0.000	32	170	16667	16131	0.265	Error	Error	9098	7569	0	0	8429	7702	0	0	0	0
2	6	1	"SEO1"	"YAL067C"	6870	25520	60	5116	6008	3095	100	105	44	100	100	0	2464	2772	1592	68	75	35	100	100	0	0	0	0	0	0	0	0	0	0	0	0	0	0	0	0	0	0	0	2.093	2.185	2.137	2.334	1.765	2.220	0.850	0.000	0.000	0.000	0.000	0.000	0.000	0.000	0.000	0.000	0.000	0.000	0.000	0.000	0.000	32	170	7412	8612	1.066	Error	Error	5016	2396	0	0	5908	2704	0	0	0	0
2	7	1	"ERP2"	"YAL007C"	7080	25520	80	8264	10364	9851	110	118	51	100	100	0	12543	11986	6973	66	73	28	100	100	0	0	0	0	0	0	0	0	0	0	0	0	0	0	0	0	0	0	0	0.654	0.860	0.683	0.777	2.167	1.073	0.766	0.000	0.000	0.000	0.000	0.000	0.000	0.000	0.000	0.000	0.000	0.000	0.000	0.000	0.000	52	332	20631	22174	-0.614	Error	Error	8154	12477	0	0	10254	11920	0	0	0	0
2	8	1	""	"YAL037W"	7290	25510	90	3905	4014	878	104	112	54	100	100	0	3745	3775	786	70	77	33	100	100	0	0	0	0	0	0	0	0	0	0	0	0	0	0	0	0	0	0	0	1.034	1.055	1.037	1.057	1.288	1.008	0.906	0.000	0.000	0.000	0.000	0.000	0.000	0.000	0.000	0.000	0.000	0.000	0.000	0.000	0.000	52	412	7476	7615	0.049	Error	Error	3801	3675	0	0	3910	3705	0	0	0	0
2	9	1	""	"YAL069W"	7490	25510	90	46523	44500	10638	109	117	52	100	100	0	24315	23440	5234	74	85	48	100	100	0	0	0	0	0	0	0	0	0	0	0	0	0	0	0	0	0	0	0	1.915	1.900	1.950	1.873	1.339	1.920	0.915	0.000	0.000	0.000	0.000	0.000	0.000	0.000	0.000	0.000	0.000	0.000	0.000	0.000	0.000	52	412	70655	67757	0.937	Error	Error	46414	24241	0	0	44391	23366	0	0	0	0
2	10	1	"SPO7"	"YAL009W"	7680	25510	90	4928	4835	1142	110	116	50	100	100	0	9465	9402	2294	71	82	39	100	100	0	0	0	0	0	0	0	0	0	0	0	0	0	0	0	0	0	0	0	0.513	0.506	0.511	0.513	1.460	0.487	0.899	0.000	0.000	0.000	0.000	0.000	0.000	0.000	0.000	0.000	0.000	0.000	0.000	0.000	0.000	52	412	14212	14056	-0.963	Error	Error	4818	9394	0	0	4725	9331	0	0	0	0
2	11	1	"CYC3"	"YAL039C"	7890	25510	80	9560	9015	2414	101	106	52	100	100	0	2500	2335	649	68	72	26	100	100	0	0	0	0	0	0	0	0	0	0	0	0	0	0	0	0	0	0	0	3.889	3.932	4.031	3.941	1.305	3.991	0.923	0.000	0.000	0.000	0.000	0.000	0.000	0.000	0.000	0.000	0.000	0.000	0.000	0.000	0.000	52	320	11891	11181	1.960	Error	Error	9459	2432	0	0	8914	2267	0	0	0	0
2	12	1	""	"YAR002W"	8090	25520	100	7231	6783	2111	102	110	49	100	100	0	29561	27009	8502	70	81	44	100	100	0	0	0	0	0	0	0	0	0	0	0	0	0	0	0	0	0	0	0	0.242	0.248	0.247	0.265	1.962	0.238	0.913	0.000	0.000	0.000	0.000	0.000	0.000	0.000	0.000	0.000	0.000	0.000	0.000	0.000	0.000	80	540	36620	33620	-2.049	Error	Error	7129	29491	0	0	6681	26939	0	0	0	0
2	13	1	"CNS1"	"YBR155W"	8290	25520	80	8297	7523	2877	110	121	61	100	100	0	11579	9718	4334	70	78	40	98	96	0	0	0	0	0	0	0	0	0	0	0	0	0	0	0	0	0	0	0	0.711	0.768	0.783	0.954	2.197	0.733	0.917	0.000	0.000	0.000	0.000	0.000	0.000	0.000	0.000	0.000	0.000	0.000	0.000	0.000	0.000	52	332	19696	17061	-0.491	Error	Error	8187	11509	0	0	7413	9648	0	0	0	0
2	14	1	"PCH2"	"YBR186W"	8480	25510	70	3080	4672	4618	113	126	101	100	100	0	1049	2327	2369	67	74	35	93	93	0	0	0	0	0	0	0	0	0	0	0	0	0	0	0	0	0	0	0	3.021	2.017	1.956	2.308	2.155	2.088	0.785	0.000	0.000	0.000	0.000	0.000	0.000	0.000	0.000	0.000	0.000	0.000	0.000	0.000	0.000	32	230	3949	6819	1.595	Error	Error	2967	982	0	0	4559	2260	0	0	0	0
2	15	1	"PYC2"	"YBR218C"	8680	25520	80	1461	1749	1172	106	112	48	100	98	0	863	1199	914	69	76	39	100	100	0	0	0	0	0	0	0	0	0	0	0	0	0	0	0	0	0	0	0	1.707	1.454	1.538	1.470	1.934	1.417	0.789	0.000	0.000	0.000	0.000	0.000	0.000	0.000	0.000	0.000	0.000	0.000	0.000	0.000	0.000	52	332	2149	2773	0.771	Error	Error	1355	794	0	0	1643	1130	0	0	0	0
2	16	1	"ICS2"	"YBR157C"	8890	25510	80	2753	2572	814	108	114	52	100	100	0	1074	973	375	66	74	32	96	92	0	0	0	0	0	0	0	0	0	0	0	0	0	0	0	0	0	0	0	2.624	2.717	2.739	3.135	2.182	2.780	0.853	0.000	0.000	0.000	0.000	0.000	0.000	0.000	0.000	0.000	0.000	0.000	0.000	0.000	0.000	52	320	3653	3371	1.392	Error	Error	2645	1008	0	0	2464	907	0	0	0	0
2	17	1	"NTC20"	"YBR188C"	9090	25510	70	7709	7146	1990	111	115	58	100	100	0	2837	2617	785	66	73	34	100	100	0	0	0	0	0	0	0	0	0	0	0	0	0	0	0	0	0	0	0	2.742	2.758	2.801	2.783	1.355	2.776	0.872	0.000	0.000	0.000	0.000	0.000	0.000	0.000	0.000	0.000	0.000	0.000	0.000	0.000	0.000	32	230	10369	9586	1.455	Error	Error	7598	2771	0	0	7035	2551	0	0	0	0
2	18	1	""	"YBR220C"	9290	25510	70	11148	10557	2681	106	122	82	100	100	0	4123	3688	941	66	78	61	100	100	0	0	0	0	0	0	0	0	0	0	0	0	0	0	0	0	0	0	0	2.722	2.885	2.921	2.884	1.268	2.878	0.920	0.000	0.000	0.000	0.000	0.000	0.000	0.000	0.000	0.000	0.000	0.000	0.000	0.000	0.000	32	230	15099	14073	1.445	Error	Error	11042	4057	0	0	10451	3622	0	0	0	0
2	19	1	""	"YBR159W"	9490	25520	80	6303	5881	1815	109	119	70	100	100	0	2405	2289	667	66	73	47	100	100	0	0	0	0	0	0	0	0	0	0	0	0	0	0	0	0	0	0	0	2.648	2.596	2.593	2.644	1.674	2.721	0.897	0.000	0.000	0.000	0.000	0.000	0.000	0.000	0.000	0.000	0.000	0.000	0.000	0.000	0.000	52	332	8533	7995	1.405	Error	Error	6194	2339	0	0	5772	2223	0	0	0	0
2	20	1	""	"YBR190W"	9700	25520	80	2250	1931	815	104	112	48	100	100	0	848	819	307	65	72	29	100	98	0	0	0	0	0	0	0	0	0	0	0	0	0	0	0	0	0	0	0	2.741	2.423	2.419	2.300	1.729	2.604	0.868	0.000	0.000	0.000	0.000	0.000	0.000	0.000	0.000	0.000	0.000	0.000	0.000	0.000	0.000	52	332	2929	2581	1.455	Error	Error	2146	783	0	0	1827	754	0	0	0	0
2	21	1	"FAT2"	"YBR222C"	9890	25510	70	3900	4613	2825	104	117	77	100	100	0	1056	1513	1128	65	75	47	96	93	0	0	0	0	0	0	0	0	0	0	0	0	0	0	0	0	0	0	0	3.830	3.114	3.207	3.462	1.943	2.900	0.885	0.000	0.000	0.000	0.000	0.000	0.000	0.000	0.000	0.000	0.000	0.000	0.000	0.000	0.000	32	230	4787	5957	1.938	Error	Error	3796	991	0	0	4509	1448	0	0	0	0
2	1	2	""	"YBR161W"	5900	25730	90	6995	6446	1604	93	102	45	100	100	0	12208	11684	2576	70	76	33	100	100	0	0	0	0	0	0	0	0	0	0	0	0	0	0	0	0	0	0	0	0.569	0.547	0.566	0.544	1.313	0.541	0.900	0.000	0.000	0.000	0.000	0.000	0.000	0.000	0.000	0.000	0.000	0.000	0.000	0.000	0.000	52	412	19040	17967	-0.814	Error	Error	6902	12138	0	0	6353	11614	0	0	0	0
2	2	2	"RIM2"	"YBR192W"	6090	25720	90	5570	5502	1195	104	111	59	100	100	0	8895	8381	2125	68	76	36	100	100	0	0	0	0	0	0	0	0	0	0	0	0	0	0	0	0	0	0	0	0.619	0.649	0.650	0.658	1.443	0.601	0.896	0.000	0.000	0.000	0.000	0.000	0.000	0.000	0.000	0.000	0.000	0.000	0.000	0.000	0.000	52	420	14293	13711	-0.691	Error	Error	5466	8827	0	0	5398	8313	0	0	0	0
2	3	2	""	"YBR224W"	6300	25730	90	5458	5146	1386	96	107	55	100	100	0	2559	2468	513	65	74	30	100	100	0	0	0	0	0	0	0	0	0	0	0	0	0	0	0	0	0	0	0	2.150	2.102	2.111	2.052	1.259	2.154	0.905	0.000	0.000	0.000	0.000	0.000	0.000	0.000	0.000	0.000	0.000	0.000	0.000	0.000	0.000	52	420	7856	7453	1.104	Error	Error	5362	2494	0	0	5050	2403	0	0	0	0
2	4	2	"GPM2"	"YDL021W"	6490	25720	80	2863	3329	2014	96	106	48	100	100	0	7470	8389	4953	66	74	29	100	100	0	0	0	0	0	0	0	0	0	0	0	0	0	0	0	0	0	0	0	0.374	0.388	0.394	0.398	1.630	0.384	0.908	0.000	0.000	0.000	0.000	0.000	0.000	0.000	0.000	0.000	0.000	0.000	0.000	0.000	0.000	52	340	10171	11556	-1.420	Error	Error	2767	7404	0	0	3233	8323	0	0	0	0
2	5	2	""	"YDL053C"	6710	25730	100	2933	2938	1149	98	108	53	100	100	0	1777	1702	637	68	77	63	98	97	0	0	0	0	0	0	0	0	0	0	0	0	0	0	0	0	0	0	0	1.659	1.738	1.729	1.820	1.779	1.801	0.886	0.000	0.000	0.000	0.000	0.000	0.000	0.000	0.000	0.000	0.000	0.000	0.000	0.000	0.000	80	548	4544	4474	0.730	Error	Error	2835	1709	0	0	2840	1634	0	0	0	0
2	6	2	""	"YDL085W"	6910	25720	80	7102	8628	6460	98	107	49	100	100	0	5116	5284	3965	66	75	37	100	100	0	0	0	0	0	0	0	0	0	0	0	0	0	0	0	0	0	0	0	1.387	1.635	1.629	1.563	1.596	1.661	0.923	0.000	0.000	0.000	0.000	0.000	0.000	0.000	0.000	0.000	0.000	0.000	0.000	0.000	0.000	52	340	12054	13748	0.472	Error	Error	7004	5050	0	0	8530	5218	0	0	0	0
2	7	2	""	"YDL023C"	7100	25720	80	3948	3771	1917	103	113	97	100	98	0	1931	1928	1024	68	85	88	98	96	0	0	0	0	0	0	0	0	0	0	0	0	0	0	0	0	0	0	0	2.064	1.972	1.928	2.153	1.759	1.972	0.901	0.000	0.000	0.000	0.000	0.000	0.000	0.000	0.000	0.000	0.000	0.000	0.000	0.000	0.000	52	340	5708	5528	1.045	Error	Error	3845	1863	0	0	3668	1860	0	0	0	0
2	8	2	"PSA1"	"YDL055C"	7310	25730	90	1881	2370	1576	105	109	49	100	100	0	4236	4273	2739	69	79	42	100	100	0	0	0	0	0	0	0	0	0	0	0	0	0	0	0	0	0	0	0	0.426	0.539	0.528	0.537	1.682	0.537	0.896	0.000	0.000	0.000	0.000	0.000	0.000	0.000	0.000	0.000	0.000	0.000	0.000	0.000	0.000	52	420	5943	6469	-1.230	Error	Error	1776	4167	0	0	2265	4204	0	0	0	0
2	9	2	"LUC7"	"YDL087C"	7500	25730	90	7761	7798	2799	103	111	54	100	100	0	4470	4133	1586	70	79	37	100	100	0	0	0	0	0	0	0	0	0	0	0	0	0	0	0	0	0	0	0	1.740	1.894	1.890	1.995	1.622	1.881	0.925	0.000	0.000	0.000	0.000	0.000	0.000	0.000	0.000	0.000	0.000	0.000	0.000	0.000	0.000	52	420	12058	11758	0.799	Error	Error	7658	4400	0	0	7695	4063	0	0	0	0
2	10	2	""	"YDL025C"	7710	25720	100	8480	9765	6095	105	113	52	98	98	0	7695	8248	4239	69	77	35	100	98	0	0	0	0	0	0	0	0	0	0	0	0	0	0	0	0	0	0	0	1.098	1.181	1.113	1.068	1.524	1.276	0.889	0.000	0.000	0.000	0.000	0.000	0.000	0.000	0.000	0.000	0.000	0.000	0.000	0.000	0.000	80	546	16001	17839	0.135	Error	Error	8375	7626	0	0	9660	8179	0	0	0	0
2	11	2	""	"YDL057W"	7900	25720	90	2768	4162	3366	105	111	50	100	100	0	2163	3204	2756	67	76	36	100	100	0	0	0	0	0	0	0	0	0	0	0	0	0	0	0	0	0	0	0	1.271	1.293	1.322	1.368	1.663	1.258	0.876	0.000	0.000	0.000	0.000	0.000	0.000	0.000	0.000	0.000	0.000	0.000	0.000	0.000	0.000	52	414	4759	7194	0.345	Error	Error	2663	2096	0	0	4057	3137	0	0	0	0
2	12	2	""	"YDL089W"	8110	25730	90	912	1391	1346	108	112	47	98	96	0	1041	1925	1996	68	76	35	100	100	0	0	0	0	0	0	0	0	0	0	0	0	0	0	0	0	0	0	0	0.826	0.691	0.666	0.724	1.897	0.665	0.871	0.000	0.000	0.000	0.000	0.000	0.000	0.000	0.000	0.000	0.000	0.000	0.000	0.000	0.000	52	420	1777	3140	-0.275	Error	Error	804	973	0	0	1283	1857	0	0	0	0
2	13	2	""	"YDL027C"	8310	25730	100	5555	4917	1903	104	114	57	98	98	0	3348	3003	1206	69	77	36	100	100	0	0	0	0	0	0	0	0	0	0	0	0	0	0	0	0	0	0	0	1.662	1.640	1.617	1.667	1.953	1.669	0.905	0.000	0.000	0.000	0.000	0.000	0.000	0.000	0.000	0.000	0.000	0.000	0.000	0.000	0.000	80	541	8730	7747	0.733	Error	Error	5451	3279	0	0	4813	2934	0	0	0	0
2	14	2	"RAD59"	"YDL059C"	8500	25720	90	3698	3594	837	102	107	46	100	100	0	2232	2096	663	65	72	32	100	100	0	0	0	0	0	0	0	0	0	0	0	0	0	0	0	0	0	0	0	1.659	1.719	1.682	1.848	1.749	1.741	0.870	0.000	0.000	0.000	0.000	0.000	0.000	0.000	0.000	0.000	0.000	0.000	0.000	0.000	0.000	52	414	5763	5523	0.731	Error	Error	3596	2167	0	0	3492	2031	0	0	0	0
2	15	2	""	"YDL091C"	8710	25720	80	8270	7774	2500	109	113	45	100	100	0	11279	9927	3278	72	78	33	100	100	0	0	0	0	0	0	0	0	0	0	0	0	0	0	0	0	0	0	0	0.728	0.778	0.778	0.801	1.483	0.750	0.917	0.000	0.000	0.000	0.000	0.000	0.000	0.000	0.000	0.000	0.000	0.000	0.000	0.000	0.000	52	340	19368	17520	-0.458	Error	Error	8161	11207	0	0	7665	9855	0	0	0	0
2	16	2	"RPA14"	"YDR156W"	8900	25720	90	1396	1512	628	118	127	64	100	100	0	451	498	210	72	85	56	98	96	0	0	0	0	0	0	0	0	0	0	0	0	0	0	0	0	0	0	0	3.372	3.272	3.420	3.415	1.588	3.463	0.783	0.000	0.000	0.000	0.000	0.000	0.000	0.000	0.000	0.000	0.000	0.000	0.000	0.000	0.000	52	420	1657	1820	1.754	Error	Error	1278	379	0	0	1394	426	0	0	0	0
2	17	2	""	"YDR187C"	9110	25730	80	623	1305	1745	107	113	51	94	90	0	235	372	358	67	72	32	86	80	0	0	0	0	0	0	0	0	0	0	0	0	0	0	0	0	0	0	0	3.071	3.928	3.381	3.435	2.395	5.457	0.670	0.000	0.000	0.000	0.000	0.000	0.000	0.000	0.000	0.000	0.000	0.000	0.000	0.000	0.000	52	340	684	1503	1.619	Error	Error	516	168	0	0	1198	305	0	0	0	0
2	18	2	""	"YDR219C"	9300	25720	70	681	2044	2782	103	114	54	93	87	0	590	1659	2075	64	73	36	96	96	0	0	0	0	0	0	0	0	0	0	0	0	0	0	0	0	0	0	0	1.099	1.217	0.969	0.924	2.963	1.348	0.786	0.000	0.000	0.000	0.000	0.000	0.000	0.000	0.000	0.000	0.000	0.000	0.000	0.000	0.000	32	236	1104	3536	0.136	Error	Error	578	526	0	0	1941	1595	0	0	0	0
2	19	2	"HOM2"	"YDR158W"	9510	25730	80	22557	27080	18797	104	124	187	100	100	5	10424	12887	8703	64	76	73	96	96	0	0	0	0	0	0	0	0	0	0	0	0	0	0	0	0	0	0	0	2.167	2.104	2.184	2.295	2.222	2.216	0.863	0.000	0.000	0.000	0.000	0.000	0.000	0.000	0.000	0.000	0.000	0.000	0.000	0.000	0.000	52	340	32813	39799	1.116	Error	Error	22453	10360	0	0	26976	12823	0	0	0	0
2	20	2	"SLY1"	"YDR189W"	9710	25730	80	5039	5782	4288	106	115	61	96	96	0	6040	7405	5531	65	72	30	100	98	0	0	0	0	0	0	0	0	0	0	0	0	0	0	0	0	0	0	0	0.826	0.773	0.765	0.726	1.833	0.764	0.906	0.000	0.000	0.000	0.000	0.000	0.000	0.000	0.000	0.000	0.000	0.000	0.000	0.000	0.000	52	340	10908	13016	-0.276	Error	Error	4933	5975	0	0	5676	7340	0	0	0	0
2	21	2	""	"YDR221W"	9910	25730	80	910	2382	3176	116	123	60	98	94	0	792	1425	1546	64	71	29	100	100	0	0	0	0	0	0	0	0	0	0	0	0	0	0	0	0	0	0	0	1.091	1.665	1.422	1.299	2.410	2.074	0.778	0.000	0.000	0.000	0.000	0.000	0.000	0.000	0.000	0.000	0.000	0.000	0.000	0.000	0.000	52	340	1522	3627	0.125	Error	Error	794	728	0	0	2266	1361	0	0	0	0
2	1	3	"SSY1"	"YDR160W"	5910	25940	90	10207	10842	4850	104	111	51	100	100	0	8445	8697	3116	67	74	32	100	100	0	0	0	0	0	0	0	0	0	0	0	0	0	0	0	0	0	0	0	1.206	1.244	1.194	1.178	1.413	1.313	0.925	0.000	0.000	0.000	0.000	0.000	0.000	0.000	0.000	0.000	0.000	0.000	0.000	0.000	0.000	52	420	18481	19368	0.270	Error	Error	10103	8378	0	0	10738	8630	0	0	0	0
2	2	3	"HST4"	"YDR191W"	6110	25930	90	3700	5017	3983	103	114	63	100	98	0	3832	4901	3740	66	73	32	100	100	0	0	0	0	0	0	0	0	0	0	0	0	0	0	0	0	0	0	0	0.955	1.016	1.006	0.969	1.639	1.036	0.936	0.000	0.000	0.000	0.000	0.000	0.000	0.000	0.000	0.000	0.000	0.000	0.000	0.000	0.000	52	420	7363	9749	-0.066	Error	Error	3597	3766	0	0	4914	4835	0	0	0	0
2	3	3	""	"YDR223W"	6280	25920	50	270	489	425	112	128	72	100	50	0	289	395	357	77	90	55	75	75	0	0	0	0	0	0	0	0	0	0	0	0	0	0	0	0	0	0	0	0.745	1.186	1.072	1.466	2.726	1.357	0.573	0.000	0.000	0.000	0.000	0.000	0.000	0.000	0.000	0.000	0.000	0.000	0.000	0.000	0.000	12	104	370	695	-0.424	Error	Error	158	212	0	0	377	318	0	0	0	0
2	4	3	"NBP2"	"YDR162C"	6500	25920	50	478	542	263	129	131	62	91	91	0	416	569	318	74	94	71	100	100	0	0	0	0	0	0	0	0	0	0	0	0	0	0	0	0	0	0	0	1.020	0.834	0.843	0.806	2.033	0.353	0.517	0.000	0.000	0.000	0.000	0.000	0.000	0.000	0.000	0.000	0.000	0.000	0.000	0.000	0.000	12	104	691	908	0.029	Error	Error	349	342	0	0	413	495	0	0	0	0
2	5	3	""	"YDR193W"	6700	25930	90	2694	2993	2215	104	111	50	98	98	0	1509	1770	1370	68	75	34	94	86	0	0	0	0	0	0	0	0	0	0	0	0	0	0	0	0	0	0	0	1.797	1.697	1.783	2.067	2.805	1.691	0.832	0.000	0.000	0.000	0.000	0.000	0.000	0.000	0.000	0.000	0.000	0.000	0.000	0.000	0.000	52	420	4031	4591	0.846	Error	Error	2590	1441	0	0	2889	1702	0	0	0	0
2	6	3	"HTA1"	"YDR225W"	6900	25940	80	3308	3115	1388	106	112	50	100	100	0	5623	5060	2186	71	78	36	100	100	0	0	0	0	0	0	0	0	0	0	0	0	0	0	0	0	0	0	0	0.577	0.603	0.623	0.590	2.142	0.606	0.846	0.000	0.000	0.000	0.000	0.000	0.000	0.000	0.000	0.000	0.000	0.000	0.000	0.000	0.000	52	340	8754	7998	-0.794	Error	Error	3202	5552	0	0	3009	4989	0	0	0	0
2	7	3	""	"YDR539W"	7100	25930	70	919	2058	3096	107	119	59	100	100	0	718	1396	1961	74	84	46	100	96	0	0	0	0	0	0	0	0	0	0	0	0	0	0	0	0	0	0	0	1.261	1.476	1.070	1.224	2.124	1.736	0.599	0.000	0.000	0.000	0.000	0.000	0.000	0.000	0.000	0.000	0.000	0.000	0.000	0.000	0.000	32	236	1456	3273	0.334	Error	Error	812	644	0	0	1951	1322	0	0	0	0
2	8	3	""	"YEL025C"	7310	25930	80	3567	5050	4514	106	116	58	100	100	0	2777	4287	3790	72	83	45	100	100	0	0	0	0	0	0	0	0	0	0	0	0	0	0	0	0	0	0	0	1.279	1.173	1.231	1.164	1.748	1.192	0.864	0.000	0.000	0.000	0.000	0.000	0.000	0.000	0.000	0.000	0.000	0.000	0.000	0.000	0.000	52	340	6166	9159	0.356	Error	Error	3461	2705	0	0	4944	4215	0	0	0	0
2	9	3	""	"YEL057C"	7500	25930	80	4330	4218	2706	101	110	56	94	94	0	3248	3324	2061	76	88	50	96	94	0	0	0	0	0	0	0	0	0	0	0	0	0	0	0	0	0	0	0	1.333	1.268	1.329	1.246	1.996	1.294	0.910	0.000	0.000	0.000	0.000	0.000	0.000	0.000	0.000	0.000	0.000	0.000	0.000	0.000	0.000	52	340	7401	7365	0.415	Error	Error	4229	3172	0	0	4117	3248	0	0	0	0
2	10	3	""	"YDR541C"	7710	25940	80	990	2042	2694	107	113	53	96	96	0	1172	1872	2234	70	75	32	96	92	0	0	0	0	0	0	0	0	0	0	0	0	0	0	0	0	0	0	0	0.801	1.074	0.985	1.087	2.568	1.179	0.856	0.000	0.000	0.000	0.000	0.000	0.000	0.000	0.000	0.000	0.000	0.000	0.000	0.000	0.000	52	340	1985	3737	-0.320	Error	Error	883	1102	0	0	1935	1802	0	0	0	0
2	11	3	"CUP5"	"YEL027W"	7900	25930	80	3200	3328	1636	102	109	51	100	98	0	2915	2510	1544	69	78	36	98	96	0	0	0	0	0	0	0	0	0	0	0	0	0	0	0	0	0	0	0	1.089	1.322	1.358	1.625	2.129	1.227	0.890	0.000	0.000	0.000	0.000	0.000	0.000	0.000	0.000	0.000	0.000	0.000	0.000	0.000	0.000	52	340	5944	5667	0.122	Error	Error	3098	2846	0	0	3226	2441	0	0	0	0
2	12	3	"SOM1"	"YEL059C-A"	8100	25930	80	3403	3373	1481	108	116	56	100	100	0	1567	1317	655	66	74	33	100	96	0	0	0	0	0	0	0	0	0	0	0	0	0	0	0	0	0	0	0	2.195	2.610	2.645	3.090	2.191	2.643	0.824	0.000	0.000	0.000	0.000	0.000	0.000	0.000	0.000	0.000	0.000	0.000	0.000	0.000	0.000	52	340	4796	4516	1.134	Error	Error	3295	1501	0	0	3265	1251	0	0	0	0
2	13	3	""	"YDR543C"	8300	25930	70	476	884	948	104	116	48	87	81	0	289	736	794	71	81	35	96	81	0	0	0	0	0	0	0	0	0	0	0	0	0	0	0	0	0	0	0	1.706	1.173	1.406	1.291	2.639	1.216	0.740	0.000	0.000	0.000	0.000	0.000	0.000	0.000	0.000	0.000	0.000	0.000	0.000	0.000	0.000	32	236	590	1445	0.771	Error	Error	372	218	0	0	780	665	0	0	0	0
2	14	3	""	"YEL029C"	8510	25940	80	4152	6369	6004	104	114	61	98	98	0	5461	7162	6007	64	70	31	98	98	0	0	0	0	0	0	0	0	0	0	0	0	0	0	0	0	0	0	0	0.750	0.883	0.849	0.953	2.164	0.935	0.820	0.000	0.000	0.000	0.000	0.000	0.000	0.000	0.000	0.000	0.000	0.000	0.000	0.000	0.000	52	340	9445	13363	-0.415	Error	Error	4048	5397	0	0	6265	7098	0	0	0	0
2	15	3	"PRB1"	"YEL060C"	8710	25940	70	552	659	476	97	110	56	96	90	0	351	447	303	66	74	45	100	87	0	0	0	0	0	0	0	0	0	0	0	0	0	0	0	0	0	0	0	1.596	1.475	1.502	1.412	1.884	1.615	0.757	0.000	0.000	0.000	0.000	0.000	0.000	0.000	0.000	0.000	0.000	0.000	0.000	0.000	0.000	32	236	740	943	0.675	Error	Error	455	285	0	0	562	381	0	0	0	0
2	16	3	"YRF1-1"	"YDR545W"	8920	25940	80	3588	7988	10033	110	120	55	100	100	0	2071	4123	4563	72	83	40	96	96	0	0	0	0	0	0	0	0	0	0	0	0	0	0	0	0	0	0	0	1.740	1.945	1.732	1.830	2.038	2.349	0.721	0.000	0.000	0.000	0.000	0.000	0.000	0.000	0.000	0.000	0.000	0.000	0.000	0.000	0.000	52	340	5477	11929	0.799	Error	Error	3478	1999	0	0	7878	4051	0	0	0	0
2	17	3	"SPF1"	"YEL031W"	9120	25940	80	181	205	122	109	117	59	55	34	0	179	196	103	68	74	36	78	71	0	0	0	0	0	0	0	0	0	0	0	0	0	0	0	0	0	0	0	0.649	0.750	0.806	0.732	2.910	0.895	0.287	0.000	0.000	0.000	0.000	0.000	0.000	0.000	0.000	0.000	0.000	0.000	0.000	0.000	0.000	52	340	183	224	-0.624	Error	Error	72	111	0	0	96	128	0	0	0	0
2	18	3	"NPR2"	"YEL062W"	9310	25920	70	4449	4991	3228	108	122	93	100	100	0	3955	4926	3153	68	95	204	100	100	0	0	0	0	0	0	0	0	0	0	0	0	0	0	0	0	0	0	0	1.117	1.005	1.077	0.953	1.796	0.986	0.898	0.000	0.000	0.000	0.000	0.000	0.000	0.000	0.000	0.000	0.000	0.000	0.000	0.000	0.000	32	236	8228	9741	0.159	Error	Error	4341	3887	0	0	4883	4858	0	0	0	0
2	19	3	"PES4"	"YFR023W"	9520	25920	80	6562	6859	3880	112	118	52	100	100	0	13590	13325	6558	67	74	37	100	98	0	0	0	0	0	0	0	0	0	0	0	0	0	0	0	0	0	0	0	0.477	0.509	0.534	0.505	1.687	0.513	0.886	0.000	0.000	0.000	0.000	0.000	0.000	0.000	0.000	0.000	0.000	0.000	0.000	0.000	0.000	52	340	19973	20005	-1.068	Error	Error	6450	13523	0	0	6747	13258	0	0	0	0
2	20	3	"HXK1"	"YFR053C"	9730	25920	70	11627	9722	3852	107	134	144	100	100	0	7828	6822	2461	67	100	198	100	100	0	0	0	0	0	0	0	0	0	0	0	0	0	0	0	0	0	0	0	1.484	1.423	1.452	1.388	1.519	1.452	0.885	0.000	0.000	0.000	0.000	0.000	0.000	0.000	0.000	0.000	0.000	0.000	0.000	0.000	0.000	32	236	19281	16370	0.570	Error	Error	11520	7761	0	0	9615	6755	0	0	0	0
2	21	3	"SCW11"	"YGL028C"	9920	25930	90	7469	7777	4015	111	118	56	100	100	0	10147	10186	4409	66	73	46	100	100	0	0	0	0	0	0	0	0	0	0	0	0	0	0	0	0	0	0	0	0.730	0.758	0.758	0.721	1.464	0.783	0.908	0.000	0.000	0.000	0.000	0.000	0.000	0.000	0.000	0.000	0.000	0.000	0.000	0.000	0.000	52	372	17439	17786	-0.454	Error	Error	7358	10081	0	0	7666	10120	0	0	0	0
2	1	4	""	"YFR024C-A"	5910	26130	70	567	1435	1895	100	106	49	96	87	0	639	2451	3431	67	71	27	100	100	0	0	0	0	0	0	0	0	0	0	0	0	0	0	0	0	0	0	0	0.816	0.560	0.549	0.535	2.097	0.511	0.740	0.000	0.000	0.000	0.000	0.000	0.000	0.000	0.000	0.000	0.000	0.000	0.000	0.000	0.000	32	236	1039	3719	-0.293	Error	Error	467	572	0	0	1335	2384	0	0	0	0
2	2	4	""	"YFR055W"	6120	26140	90	7997	7597	2170	100	109	57	100	100	0	6390	6077	1333	69	75	39	100	100	0	0	0	0	0	0	0	0	0	0	0	0	0	0	0	0	0	0	0	1.249	1.248	1.271	1.227	1.321	1.308	0.898	0.000	0.000	0.000	0.000	0.000	0.000	0.000	0.000	0.000	0.000	0.000	0.000	0.000	0.000	52	420	14218	13505	0.321	Error	Error	7897	6321	0	0	7497	6008	0	0	0	0
2	3	4	"RPL30"	"YGL030W"	6310	26130	80	2478	2668	1385	102	111	51	100	100	0	2172	2030	962	70	78	43	100	100	0	0	0	0	0	0	0	0	0	0	0	0	0	0	0	0	0	0	0	1.130	1.309	1.355	1.286	1.588	1.365	0.852	0.000	0.000	0.000	0.000	0.000	0.000	0.000	0.000	0.000	0.000	0.000	0.000	0.000	0.000	52	340	4478	4526	0.177	Error	Error	2376	2102	0	0	2566	1960	0	0	0	0
2	4	4	""	"YFR026C"	6510	26130	90	3997	4047	929	102	109	51	100	100	0	2724	2649	565	68	78	70	100	100	0	0	0	0	0	0	0	0	0	0	0	0	0	0	0	0	0	0	0	1.466	1.528	1.532	1.529	1.323	1.503	0.913	0.000	0.000	0.000	0.000	0.000	0.000	0.000	0.000	0.000	0.000	0.000	0.000	0.000	0.000	52	420	6551	6526	0.552	Error	Error	3895	2656	0	0	3945	2581	0	0	0	0
2	5	4	""	"YFR057W"	6710	26130	60	235	313	218	113	122	72	65	46	0	244	299	250	72	82	40	87	78	0	0	0	0	0	0	0	0	0	0	0	0	0	0	0	0	0	0	0	0.709	0.881	0.785	0.808	3.011	0.837	0.481	0.000	0.000	0.000	0.000	0.000	0.000	0.000	0.000	0.000	0.000	0.000	0.000	0.000	0.000	32	176	294	427	-0.496	Error	Error	122	172	0	0	200	227	0	0	0	0
2	6	4	"AGA2"	"YGL032C"	6910	26130	80	2378	2296	650	103	107	50	100	100	0	2496	2479	671	67	75	36	100	100	0	0	0	0	0	0	0	0	0	0	0	0	0	0	0	0	0	0	0	0.937	0.909	0.898	0.899	1.405	0.902	0.835	0.000	0.000	0.000	0.000	0.000	0.000	0.000	0.000	0.000	0.000	0.000	0.000	0.000	0.000	52	340	4704	4605	-0.094	Error	Error	2275	2429	0	0	2193	2412	0	0	0	0
2	7	4	"CDC14"	"YFR028C"	7120	26130	90	7076	6690	2312	103	109	53	100	100	0	4687	3974	1820	72	81	38	100	98	0	0	0	0	0	0	0	0	0	0	0	0	0	0	0	0	0	0	0	1.511	1.688	1.634	2.176	2.532	1.621	0.893	0.000	0.000	0.000	0.000	0.000	0.000	0.000	0.000	0.000	0.000	0.000	0.000	0.000	0.000	52	420	11588	10489	0.595	Error	Error	6973	4615	0	0	6587	3902	0	0	0	0
2	8	4	"ERP6"	"YGL002W"	7320	26130	90	2728	2608	718	107	115	54	100	100	0	9385	9760	2222	76	87	46	100	100	0	0	0	0	0	0	0	0	0	0	0	0	0	0	0	0	0	0	0	0.282	0.258	0.268	0.253	1.349	0.252	0.856	0.000	0.000	0.000	0.000	0.000	0.000	0.000	0.000	0.000	0.000	0.000	0.000	0.000	0.000	52	420	11930	12185	-1.829	Error	Error	2621	9309	0	0	2501	9684	0	0	0	0
2	9	4	""	"YGL034C"	7530	26140	80	738	809	522	108	117	57	96	94	0	814	863	579	71	84	45	96	90	0	0	0	0	0	0	0	0	0	0	0	0	0	0	0	0	0	0	0	0.848	0.885	0.892	0.977	2.494	0.878	0.722	0.000	0.000	0.000	0.000	0.000	0.000	0.000	0.000	0.000	0.000	0.000	0.000	0.000	0.000	52	340	1373	1493	-0.238	Error	Error	630	743	0	0	701	792	0	0	0	0
2	10	4	"RPL11B"	"YGR085C"	7720	26130	80	5628	5166	1924	111	119	59	100	100	0	3645	3451	889	72	84	50	100	98	0	0	0	0	0	0	0	0	0	0	0	0	0	0	0	0	0	0	0	1.544	1.496	1.587	1.434	1.536	1.649	0.874	0.000	0.000	0.000	0.000	0.000	0.000	0.000	0.000	0.000	0.000	0.000	0.000	0.000	0.000	52	340	9090	8434	0.627	Error	Error	5517	3573	0	0	5055	3379	0	0	0	0
2	11	4	""	"YGR117C"	7930	26130	80	5022	4674	1688	115	121	54	100	100	0	9829	9046	2486	69	81	42	100	100	0	0	0	0	0	0	0	0	0	0	0	0	0	0	0	0	0	0	0	0.503	0.508	0.518	0.489	1.459	0.512	0.883	0.000	0.000	0.000	0.000	0.000	0.000	0.000	0.000	0.000	0.000	0.000	0.000	0.000	0.000	52	340	14667	13536	-0.992	Error	Error	4907	9760	0	0	4559	8977	0	0	0	0
2	12	4	""	"YGR149W"	8110	26130	80	6533	6284	2077	110	113	48	100	100	0	8429	7751	2279	65	74	35	100	100	0	0	0	0	0	0	0	0	0	0	0	0	0	0	0	0	0	0	0	0.768	0.803	0.832	0.776	1.510	0.800	0.896	0.000	0.000	0.000	0.000	0.000	0.000	0.000	0.000	0.000	0.000	0.000	0.000	0.000	0.000	52	340	14787	13860	-0.381	Error	Error	6423	8364	0	0	6174	7686	0	0	0	0
2	13	4	"PDC6"	"YGR087C"	8320	26130	80	7762	6918	2528	102	110	48	100	100	0	2833	2602	737	70	80	42	100	100	0	0	0	0	0	0	0	0	0	0	0	0	0	0	0	0	0	0	0	2.772	2.692	2.832	2.475	1.713	2.904	0.895	0.000	0.000	0.000	0.000	0.000	0.000	0.000	0.000	0.000	0.000	0.000	0.000	0.000	0.000	52	340	10423	9348	1.471	Error	Error	7660	2763	0	0	6816	2532	0	0	0	0
2	14	4	"NUP57"	"YGR119C"	8520	26130	90	9350	8875	2068	100	110	51	100	100	0	10117	9856	1275	64	70	33	100	100	0	0	0	0	0	0	0	0	0	0	0	0	0	0	0	0	0	0	0	0.920	0.896	0.900	0.874	1.265	0.920	0.900	0.000	0.000	0.000	0.000	0.000	0.000	0.000	0.000	0.000	0.000	0.000	0.000	0.000	0.000	52	420	19303	18567	-0.120	Error	Error	9250	10053	0	0	8775	9792	0	0	0	0
2	15	4	""	"YGR151C"	8730	26140	90	1774	1613	750	105	115	53	98	98	0	1566	1370	566	65	72	33	98	98	0	0	0	0	0	0	0	0	0	0	0	0	0	0	0	0	0	0	0	1.112	1.156	1.128	1.087	1.879	1.239	0.855	0.000	0.000	0.000	0.000	0.000	0.000	0.000	0.000	0.000	0.000	0.000	0.000	0.000	0.000	52	420	3170	2813	0.153	Error	Error	1669	1501	0	0	1508	1305	0	0	0	0
2	16	4	""	"YGR089W"	8920	26130	70	9689	10367	6839	112	123	61	100	100	0	3128	3675	2311	70	83	70	100	100	0	0	0	0	0	0	0	0	0	0	0	0	0	0	0	0	0	0	0	3.132	2.845	2.780	2.741	1.924	2.983	0.834	0.000	0.000	0.000	0.000	0.000	0.000	0.000	0.000	0.000	0.000	0.000	0.000	0.000	0.000	32	236	12635	13860	1.647	Error	Error	9577	3058	0	0	10255	3605	0	0	0	0
2	17	4	"MEP1"	"YGR121C"	9110	26120	70	14525	13532	3001	114	125	68	100	100	0	5185	4658	1292	66	81	49	100	100	0	0	0	0	0	0	0	0	0	0	0	0	0	0	0	0	0	0	0	2.815	2.922	2.857	3.023	1.432	2.962	0.880	0.000	0.000	0.000	0.000	0.000	0.000	0.000	0.000	0.000	0.000	0.000	0.000	0.000	0.000	32	236	19530	18010	1.493	Error	Error	14411	5119	0	0	13418	4592	0	0	0	0
2	18	4	""	"YGR153W"	9320	26120	70	7780	7094	1984	110	180	503	100	100	0	3808	3792	811	66	121	358	100	100	0	0	0	0	0	0	0	0	0	0	0	0	0	0	0	0	0	0	0	2.050	1.874	1.895	1.819	1.374	2.014	0.866	0.000	0.000	0.000	0.000	0.000	0.000	0.000	0.000	0.000	0.000	0.000	0.000	0.000	0.000	32	236	11412	10710	1.035	Error	Error	7670	3742	0	0	6984	3726	0	0	0	0
2	19	4	"PRP31"	"YGR091W"	9530	26130	80	4442	4193	1764	110	118	70	100	100	0	2768	2614	826	65	73	39	100	100	0	0	0	0	0	0	0	0	0	0	0	0	0	0	0	0	0	0	0	1.603	1.602	1.741	1.547	1.417	1.812	0.849	0.000	0.000	0.000	0.000	0.000	0.000	0.000	0.000	0.000	0.000	0.000	0.000	0.000	0.000	52	340	7035	6632	0.680	Error	Error	4332	2703	0	0	4083	2549	0	0	0	0
2	20	4	"PPT1"	"YGR123C"	9730	26120	90	8093	6999	2293	103	112	63	100	100	0	2694	2471	771	62	68	32	100	100	0	0	0	0	0	0	0	0	0	0	0	0	0	0	0	0	0	0	0	3.036	2.863	2.828	2.888	1.553	3.020	0.875	0.000	0.000	0.000	0.000	0.000	0.000	0.000	0.000	0.000	0.000	0.000	0.000	0.000	0.000	52	408	10622	9305	1.602	Error	Error	7990	2632	0	0	6896	2409	0	0	0	0
2	21	4	"CYS4"	"YGR155W"	9920	26090	120	6433	5510	2569	110	524	1338	84	80	0	2055	1758	779	66	221	500	85	82	0	0	0	0	0	0	0	0	0	0	0	0	0	0	0	0	0	0	0	3.179	3.191	3.247	3.177	2.024	3.216	0.928	0.000	0.000	0.000	0.000	0.000	0.000	0.000	0.000	0.000	0.000	0.000	0.000	0.000	0.000	120	696	8312	7092	1.669	Error	Error	6323	1989	0	0	5400	1692	0	0	0	0
2	1	5	"SET1"	"YHR119W"	5920	26350	80	541	1301	1893	102	111	54	86	80	0	1314	2674	3448	64	69	30	94	92	0	0	0	0	0	0	0	0	0	0	0	0	0	0	0	0	0	0	0	0.351	0.459	0.376	0.344	2.598	0.495	0.828	0.000	0.000	0.000	0.000	0.000	0.000	0.000	0.000	0.000	0.000	0.000	0.000	0.000	0.000	52	340	1689	3809	-1.510	Error	Error	439	1250	0	0	1199	2610	0	0	0	0
2	2	5	""	"YHR149C"	6130	26350	70	1195	3156	4291	112	125	72	93	90	0	1515	3945	5060	73	84	40	100	100	0	0	0	0	0	0	0	0	0	0	0	0	0	0	0	0	0	0	0	0.751	0.786	0.656	0.523	2.722	0.819	0.881	0.000	0.000	0.000	0.000	0.000	0.000	0.000	0.000	0.000	0.000	0.000	0.000	0.000	0.000	32	236	2525	6916	-0.413	Error	Error	1083	1442	0	0	3044	3872	0	0	0	0
2	3	5	""	"YHR181W"	6320	26340	70	1208	1626	1235	107	113	54	100	100	0	1467	1971	1450	68	74	30	100	100	0	0	0	0	0	0	0	0	0	0	0	0	0	0	0	0	0	0	0	0.787	0.798	0.646	0.739	1.928	0.806	0.846	0.000	0.000	0.000	0.000	0.000	0.000	0.000	0.000	0.000	0.000	0.000	0.000	0.000	0.000	32	236	2500	3422	-0.346	Error	Error	1101	1399	0	0	1519	1903	0	0	0	0
2	4	5	""	"YHR121W"	6520	26340	80	728	2133	3631	106	116	57	82	80	0	403	1189	1870	68	78	38	86	82	0	0	0	0	0	0	0	0	0	0	0	0	0	0	0	0	0	0	0	1.857	1.808	1.825	1.555	2.744	2.007	0.853	0.000	0.000	0.000	0.000	0.000	0.000	0.000	0.000	0.000	0.000	0.000	0.000	0.000	0.000	52	340	957	3148	0.893	Error	Error	622	335	0	0	2027	1121	0	0	0	0
2	5	5	""	"YHR151C"	6720	26340	60	1441	2489	2657	109	126	85	93	93	0	1107	1741	1793	76	110	282	78	68	0	0	0	0	0	0	0	0	0	0	0	0	0	0	0	0	0	0	0	1.292	1.429	1.397	1.260	2.237	1.486	0.889	0.000	0.000	0.000	0.000	0.000	0.000	0.000	0.000	0.000	0.000	0.000	0.000	0.000	0.000	32	176	2363	4045	0.370	Error	Error	1332	1031	0	0	2380	1665	0	0	0	0
2	6	5	"GND1"	"YHR183W"	6930	26340	70	734	1003	827	102	115	65	93	87	0	1394	1708	1467	70	104	286	96	71	0	0	0	0	0	0	0	0	0	0	0	0	0	0	0	0	0	0	0	0.477	0.550	0.387	0.502	2.035	0.504	0.711	0.000	0.000	0.000	0.000	0.000	0.000	0.000	0.000	0.000	0.000	0.000	0.000	0.000	0.000	32	236	1956	2539	-1.067	Error	Error	632	1324	0	0	901	1638	0	0	0	0
2	7	5	"EPT1"	"YHR123W"	7120	26340	70	1025	3195	3992	111	116	49	100	96	0	889	1806	2083	70	78	32	100	100	0	0	0	0	0	0	0	0	0	0	0	0	0	0	0	0	0	0	0	1.116	1.776	1.231	1.417	2.104	1.941	0.879	0.000	0.000	0.000	0.000	0.000	0.000	0.000	0.000	0.000	0.000	0.000	0.000	0.000	0.000	32	236	1733	4820	0.158	Error	Error	914	819	0	0	3084	1736	0	0	0	0
2	8	5	"SPO16"	"YHR153C"	7330	26340	80	752	2482	3772	110	117	55	90	86	0	853	2298	3038	72	84	50	94	92	0	0	0	0	0	0	0	0	0	0	0	0	0	0	0	0	0	0	0	0.822	1.066	0.793	0.778	2.102	1.205	0.903	0.000	0.000	0.000	0.000	0.000	0.000	0.000	0.000	0.000	0.000	0.000	0.000	0.000	0.000	52	340	1423	4598	-0.283	Error	Error	642	781	0	0	2372	2226	0	0	0	0
2	9	5	"ADY1"	"YHR185C"	7530	26340	50	772	818	602	108	118	54	100	83	0	471	603	472	76	83	37	100	100	0	0	0	0	0	0	0	0	0	0	0	0	0	0	0	0	0	0	0	1.681	1.347	0.914	1.209	2.195	1.502	0.630	0.000	0.000	0.000	0.000	0.000	0.000	0.000	0.000	0.000	0.000	0.000	0.000	0.000	0.000	12	104	1059	1237	0.749	Error	Error	664	395	0	0	710	527	0	0	0	0
2	10	5	""	"YHR125W"	7730	26330	80	13028	12002	4810	109	118	50	100	100	0	3907	3238	1466	70	78	37	98	96	0	0	0	0	0	0	0	0	0	0	0	0	0	0	0	0	0	0	0	3.367	3.754	3.847	4.191	2.023	3.816	0.872	0.000	0.000	0.000	0.000	0.000	0.000	0.000	0.000	0.000	0.000	0.000	0.000	0.000	0.000	52	340	16756	15061	1.751	Error	Error	12919	3837	0	0	11893	3168	0	0	0	0
2	11	5	""	"YHR155W"	7930	26330	70	3101	4653	3807	113	127	58	100	96	0	2365	3083	2246	68	82	53	100	100	0	0	0	0	0	0	0	0	0	0	0	0	0	0	0	0	0	0	0	1.301	1.506	1.405	1.328	1.819	1.627	0.876	0.000	0.000	0.000	0.000	0.000	0.000	0.000	0.000	0.000	0.000	0.000	0.000	0.000	0.000	32	236	5285	7555	0.379	Error	Error	2988	2297	0	0	4540	3015	0	0	0	0
2	12	5	"IKI1"	"YHR187W"	8120	26330	60	887	812	446	110	115	56	87	87	0	416	406	247	67	75	35	90	87	0	0	0	0	0	0	0	0	0	0	0	0	0	0	0	0	0	0	0	2.226	2.071	1.875	1.812	2.640	2.220	0.710	0.000	0.000	0.000	0.000	0.000	0.000	0.000	0.000	0.000	0.000	0.000	0.000	0.000	0.000	32	176	1126	1041	1.155	Error	Error	777	349	0	0	702	339	0	0	0	0
2	13	5	"YHC3"	"YJL059W"	8330	26340	70	3531	4153	2981	109	117	53	100	100	0	7599	10813	8058	71	79	35	100	100	0	0	0	0	0	0	0	0	0	0	0	0	0	0	0	0	0	0	0	0.455	0.376	0.408	0.372	1.796	0.350	0.889	0.000	0.000	0.000	0.000	0.000	0.000	0.000	0.000	0.000	0.000	0.000	0.000	0.000	0.000	32	236	10950	14786	-1.137	Error	Error	3422	7528	0	0	4044	10742	0	0	0	0
2	14	5	""	"YJL091C"	8520	26330	80	1523	2011	1473	103	111	53	100	100	0	2509	2796	2052	65	74	34	100	98	0	0	0	0	0	0	0	0	0	0	0	0	0	0	0	0	0	0	0	0.581	0.699	0.680	0.757	2.269	0.690	0.855	0.000	0.000	0.000	0.000	0.000	0.000	0.000	0.000	0.000	0.000	0.000	0.000	0.000	0.000	52	340	3864	4639	-0.783	Error	Error	1420	2444	0	0	1908	2731	0	0	0	0
2	15	5	""	"YJL123C"	8720	26320	70	13009	11483	3416	106	164	567	100	100	0	3922	3446	1257	69	106	291	96	90	0	0	0	0	0	0	0	0	0	0	0	0	0	0	0	0	0	0	0	3.349	3.369	3.359	3.741	1.854	3.306	0.889	0.000	0.000	0.000	0.000	0.000	0.000	0.000	0.000	0.000	0.000	0.000	0.000	0.000	0.000	32	236	16756	14754	1.744	Error	Error	12903	3853	0	0	11377	3377	0	0	0	0
2	16	5	"NUP82"	"YJL061W"	8930	26330	80	3579	5902	5172	107	112	57	100	100	0	2445	3083	2529	67	80	99	92	90	0	0	0	0	0	0	0	0	0	0	0	0	0	0	0	0	0	0	0	1.460	1.921	1.983	2.195	2.268	2.036	0.917	0.000	0.000	0.000	0.000	0.000	0.000	0.000	0.000	0.000	0.000	0.000	0.000	0.000	0.000	52	340	5850	8811	0.546	Error	Error	3472	2378	0	0	5795	3016	0	0	0	0
2	17	5	"TOK1"	"YJL093C"	9120	26330	80	10756	10383	3298	106	113	50	100	100	0	4890	4205	1775	68	76	37	98	96	0	0	0	0	0	0	0	0	0	0	0	0	0	0	0	0	0	0	0	2.209	2.484	2.522	2.902	1.956	2.452	0.871	0.000	0.000	0.000	0.000	0.000	0.000	0.000	0.000	0.000	0.000	0.000	0.000	0.000	0.000	52	340	15472	14414	1.143	Error	Error	10650	4822	0	0	10277	4137	0	0	0	0
2	18	5	"GCD14"	"YJL125C"	9330	26340	100	6236	5669	1843	99	108	50	100	100	0	4612	4300	1178	67	73	32	100	100	0	0	0	0	0	0	0	0	0	0	0	0	0	0	0	0	0	0	0	1.350	1.316	1.310	1.255	1.509	1.370	0.917	0.000	0.000	0.000	0.000	0.000	0.000	0.000	0.000	0.000	0.000	0.000	0.000	0.000	0.000	80	541	10682	9803	0.433	Error	Error	6137	4545	0	0	5570	4233	0	0	0	0
2	19	5	"MRPL8"	"YJL063C"	9530	26330	80	4623	4705	1588	105	114	53	100	100	0	1402	1337	400	67	71	30	100	100	0	0	0	0	0	0	0	0	0	0	0	0	0	0	0	0	0	0	0	3.384	3.622	3.371	3.762	1.818	3.963	0.836	0.000	0.000	0.000	0.000	0.000	0.000	0.000	0.000	0.000	0.000	0.000	0.000	0.000	0.000	52	340	5853	5870	1.759	Error	Error	4518	1335	0	0	4600	1270	0	0	0	0
2	20	5	"BCK1"	"YJL095W"	9730	26330	70	9727	9531	6194	101	106	47	100	100	0	10357	11930	6828	62	70	29	100	100	0	0	0	0	0	0	0	0	0	0	0	0	0	0	0	0	0	0	0	0.935	0.795	0.756	0.721	1.751	0.796	0.882	0.000	0.000	0.000	0.000	0.000	0.000	0.000	0.000	0.000	0.000	0.000	0.000	0.000	0.000	32	236	19921	21298	-0.097	Error	Error	9626	10295	0	0	9430	11868	0	0	0	0
2	21	5	"SPT10"	"YJL127C"	9920	26330	70	1176	1344	1017	103	108	51	100	93	0	556	768	658	66	72	36	100	100	0	0	0	0	0	0	0	0	0	0	0	0	0	0	0	0	0	0	0	2.190	1.768	1.890	1.678	2.088	1.735	0.713	0.000	0.000	0.000	0.000	0.000	0.000	0.000	0.000	0.000	0.000	0.000	0.000	0.000	0.000	32	236	1563	1943	1.131	Error	Error	1073	490	0	0	1241	702	0	0	0	0
2	1	6	""	"YJL065C"	5920	26530	70	5211	4995	1891	98	118	119	100	100	0	1810	1574	719	69	85	95	93	90	0	0	0	0	0	0	0	0	0	0	0	0	0	0	0	0	0	0	0	2.937	3.254	3.209	3.529	2.113	3.190	0.845	0.000	0.000	0.000	0.000	0.000	0.000	0.000	0.000	0.000	0.000	0.000	0.000	0.000	0.000	32	236	6854	6402	1.554	Error	Error	5113	1741	0	0	4897	1505	0	0	0	0
2	2	6	""	"YJL097W"	6130	26540	80	2958	2860	1713	100	120	163	98	94	0	1886	1909	953	68	85	177	100	98	0	0	0	0	0	0	0	0	0	0	0	0	0	0	0	0	0	0	0	1.572	1.499	1.464	1.300	1.824	1.638	0.859	0.000	0.000	0.000	0.000	0.000	0.000	0.000	0.000	0.000	0.000	0.000	0.000	0.000	0.000	52	340	4676	4601	0.653	Error	Error	2858	1818	0	0	2760	1841	0	0	0	0
2	3	6	"TRK1"	"YJL129C"	6330	26540	80	4689	7336	6591	105	123	166	100	98	0	2353	3374	2652	69	92	184	96	96	0	0	0	0	0	0	0	0	0	0	0	0	0	0	0	0	0	0	0	2.007	2.188	2.023	1.899	2.273	2.400	0.867	0.000	0.000	0.000	0.000	0.000	0.000	0.000	0.000	0.000	0.000	0.000	0.000	0.000	0.000	52	340	6868	10536	1.005	Error	Error	4584	2284	0	0	7231	3305	0	0	0	0
2	4	6	"OAR1"	"YKL055C"	6530	26540	80	3011	3237	1771	101	111	56	100	100	0	1593	1513	762	67	73	29	100	98	0	0	0	0	0	0	0	0	0	0	0	0	0	0	0	0	0	0	0	1.907	2.169	2.173	2.116	1.849	2.282	0.903	0.000	0.000	0.000	0.000	0.000	0.000	0.000	0.000	0.000	0.000	0.000	0.000	0.000	0.000	52	340	4436	4582	0.931	Error	Error	2910	1526	0	0	3136	1446	0	0	0	0
2	5	6	"CYT2"	"YKL087C"	6720	26530	70	3038	3760	2420	98	112	56	100	100	0	3349	3580	2199	69	84	101	100	100	0	0	0	0	0	0	0	0	0	0	0	0	0	0	0	0	0	0	0	0.896	1.043	1.085	1.054	1.554	1.005	0.857	0.000	0.000	0.000	0.000	0.000	0.000	0.000	0.000	0.000	0.000	0.000	0.000	0.000	0.000	32	236	6220	7173	-0.158	Error	Error	2940	3280	0	0	3662	3511	0	0	0	0
2	6	6	""	"YKL118W"	6930	26540	80	1495	1426	539	109	123	192	98	96	0	1841	1738	730	71	98	297	96	90	0	0	0	0	0	0	0	0	0	0	0	0	0	0	0	0	0	0	0	0.783	0.790	0.815	0.862	1.864	0.771	0.833	0.000	0.000	0.000	0.000	0.000	0.000	0.000	0.000	0.000	0.000	0.000	0.000	0.000	0.000	52	340	3156	2984	-0.353	Error	Error	1386	1770	0	0	1317	1667	0	0	0	0
2	7	6	"NUP120"	"YKL057C"	7130	26540	70	753	3053	3926	111	116	52	100	100	0	608	2315	3093	73	83	41	100	100	0	0	0	0	0	0	0	0	0	0	0	0	0	0	0	0	0	0	0	1.200	1.312	0.937	1.115	2.122	1.310	0.846	0.000	0.000	0.000	0.000	0.000	0.000	0.000	0.000	0.000	0.000	0.000	0.000	0.000	0.000	32	236	1177	5184	0.263	Error	Error	642	535	0	0	2942	2242	0	0	0	0
2	8	6	"MIF2"	"YKL089W"	7330	26530	80	6778	7881	6380	112	122	58	100	98	0	2757	3528	2690	76	88	46	94	94	0	0	0	0	0	0	0	0	0	0	0	0	0	0	0	0	0	0	0	2.486	2.251	2.042	2.287	2.041	2.391	0.890	0.000	0.000	0.000	0.000	0.000	0.000	0.000	0.000	0.000	0.000	0.000	0.000	0.000	0.000	52	340	9347	11221	1.314	Error	Error	6666	2681	0	0	7769	3452	0	0	0	0
2	9	6	"OAC1"	"YKL120W"	7520	26530	60	1244	2584	3022	120	128	59	100	96	0	1399	2315	2536	68	83	45	100	100	0	0	0	0	0	0	0	0	0	0	0	0	0	0	0	0	0	0	0	0.844	1.097	1.053	0.958	1.819	1.179	0.808	0.000	0.000	0.000	0.000	0.000	0.000	0.000	0.000	0.000	0.000	0.000	0.000	0.000	0.000	32	176	2455	4711	-0.244	Error	Error	1124	1331	0	0	2464	2247	0	0	0	0
2	10	6	""	"YKL059C"	7730	26540	80	2520	5030	5281	116	122	53	98	96	0	1948	3201	3007	72	81	39	98	98	0	0	0	0	0	0	0	0	0	0	0	0	0	0	0	0	0	0	0	1.281	1.570	1.377	1.229	2.147	1.723	0.890	0.000	0.000	0.000	0.000	0.000	0.000	0.000	0.000	0.000	0.000	0.000	0.000	0.000	0.000	52	340	4280	8043	0.358	Error	Error	2404	1876	0	0	4914	3129	0	0	0	0
2	11	6	""	"YKL091C"	7930	26530	70	1605	3534	4143	97	108	50	100	100	0	853	1633	1731	70	75	31	100	100	0	0	0	0	0	0	0	0	0	0	0	0	0	0	0	0	0	0	0	1.926	2.199	1.905	1.832	1.933	2.404	0.895	0.000	0.000	0.000	0.000	0.000	0.000	0.000	0.000	0.000	0.000	0.000	0.000	0.000	0.000	32	236	2291	5000	0.946	Error	Error	1508	783	0	0	3437	1563	0	0	0	0
2	12	6	"SRP21"	"YKL122C"	8130	26540	80	782	1361	1281	103	114	50	100	100	0	1130	1687	1433	68	76	31	98	98	0	0	0	0	0	0	0	0	0	0	0	0	0	0	0	0	0	0	0	0.639	0.777	0.755	0.773	2.306	0.822	0.861	0.000	0.000	0.000	0.000	0.000	0.000	0.000	0.000	0.000	0.000	0.000	0.000	0.000	0.000	52	340	1741	2877	-0.645	Error	Error	679	1062	0	0	1258	1619	0	0	0	0
2	13	6	""	"YKL061W"	8330	26540	90	1257	1157	438	96	105	48	98	98	0	3618	3336	1046	67	75	34	100	100	0	0	0	0	0	0	0	0	0	0	0	0	0	0	0	0	0	0	0	0.327	0.325	0.311	0.303	1.759	0.322	0.804	0.000	0.000	0.000	0.000	0.000	0.000	0.000	0.000	0.000	0.000	0.000	0.000	0.000	0.000	52	420	4712	4330	-1.613	Error	Error	1161	3551	0	0	1061	3269	0	0	0	0
2	14	6	"MBR1"	"YKL093W"	8530	26540	80	6000	5636	1434	101	108	51	100	100	0	10706	10044	3446	67	74	34	100	98	0	0	0	0	0	0	0	0	0	0	0	0	0	0	0	0	0	0	0	0.554	0.555	0.564	0.655	2.074	0.515	0.835	0.000	0.000	0.000	0.000	0.000	0.000	0.000	0.000	0.000	0.000	0.000	0.000	0.000	0.000	52	340	16538	15512	-0.851	Error	Error	5899	10639	0	0	5535	9977	0	0	0	0
2	15	6	"SSH4"	"YKL124W"	8720	26540	90	10582	9631	2331	103	110	49	100	100	0	9403	9316	2314	66	72	30	100	100	0	0	0	0	0	0	0	0	0	0	0	0	0	0	0	0	0	0	0	1.122	1.030	1.026	1.029	1.447	1.000	0.877	0.000	0.000	0.000	0.000	0.000	0.000	0.000	0.000	0.000	0.000	0.000	0.000	0.000	0.000	52	420	19816	18778	0.166	Error	Error	10479	9337	0	0	9528	9250	0	0	0	0
2	16	6	""	"YLR040C"	8940	26530	90	3256	4057	3209	105	111	51	100	100	0	3031	3610	2451	65	72	30	98	96	0	0	0	0	0	0	0	0	0	0	0	0	0	0	0	0	0	0	0	1.062	1.115	1.049	1.004	2.503	1.202	0.882	0.000	0.000	0.000	0.000	0.000	0.000	0.000	0.000	0.000	0.000	0.000	0.000	0.000	0.000	52	420	6117	7497	0.087	Error	Error	3151	2966	0	0	3952	3545	0	0	0	0
2	17	6	""	"YLR072W"	9140	26540	60	435	1024	1309	102	116	58	84	78	0	308	686	940	65	74	32	93	84	0	0	0	0	0	0	0	0	0	0	0	0	0	0	0	0	0	0	0	1.370	1.485	1.346	1.180	2.826	1.553	0.615	0.000	0.000	0.000	0.000	0.000	0.000	0.000	0.000	0.000	0.000	0.000	0.000	0.000	0.000	32	176	576	1543	0.455	Error	Error	333	243	0	0	922	621	0	0	0	0
2	18	6	""	"YLR104W"	9340	26530	80	1744	1984	1671	102	107	48	98	94	0	2073	2447	1974	64	70	29	98	96	0	0	0	0	0	0	0	0	0	0	0	0	0	0	0	0	0	0	0	0.817	0.790	0.761	0.702	2.823	0.803	0.852	0.000	0.000	0.000	0.000	0.000	0.000	0.000	0.000	0.000	0.000	0.000	0.000	0.000	0.000	52	340	3651	4265	-0.291	Error	Error	1642	2009	0	0	1882	2383	0	0	0	0
2	19	6	""	"YLR042C"	9520	26530	70	6962	6294	1890	106	127	159	100	100	0	6336	5891	2080	66	113	373	96	96	0	0	0	0	0	0	0	0	0	0	0	0	0	0	0	0	0	0	0	1.093	1.062	1.053	1.160	1.886	0.993	0.852	0.000	0.000	0.000	0.000	0.000	0.000	0.000	0.000	0.000	0.000	0.000	0.000	0.000	0.000	32	236	13126	12013	0.129	Error	Error	6856	6270	0	0	6188	5825	0	0	0	0
2	20	6	""	"YLR074C"	9740	26530	70	2585	3278	2506	115	119	49	100	100	0	1237	1543	1226	65	70	25	100	100	0	0	0	0	0	0	0	0	0	0	0	0	0	0	0	0	0	0	0	2.108	2.140	2.020	1.897	2.005	2.241	0.845	0.000	0.000	0.000	0.000	0.000	0.000	0.000	0.000	0.000	0.000	0.000	0.000	0.000	0.000	32	236	3642	4641	1.076	Error	Error	2470	1172	0	0	3163	1478	0	0	0	0
2	21	6	""	"YLR106C"	9930	26520	70	4420	4445	2542	110	121	59	100	100	0	3125	3233	1775	59	70	52	100	100	0	0	0	0	0	0	0	0	0	0	0	0	0	0	0	0	0	0	0	1.406	1.366	1.269	1.298	1.838	1.410	0.890	0.000	0.000	0.000	0.000	0.000	0.000	0.000	0.000	0.000	0.000	0.000	0.000	0.000	0.000	32	236	7376	7509	0.491	Error	Error	4310	3066	0	0	4335	3174	0	0	0	0
2	1	7	"PDC1"	"YLR044C"	5930	26730	70	2132	3683	3271	113	119	58	100	100	0	1163	2052	1748	67	75	35	100	96	0	0	0	0	0	0	0	0	0	0	0	0	0	0	0	0	0	0	0	1.842	1.798	1.716	1.700	1.915	1.889	0.872	0.000	0.000	0.000	0.000	0.000	0.000	0.000	0.000	0.000	0.000	0.000	0.000	0.000	0.000	32	236	3115	5555	0.881	Error	Error	2019	1096	0	0	3570	1985	0	0	0	0
2	2	7	""	"YLR076C"	6130	26740	80	2600	2542	1096	109	117	54	100	100	0	1284	1118	451	66	75	37	100	98	0	0	0	0	0	0	0	0	0	0	0	0	0	0	0	0	0	0	0	2.045	2.313	2.193	2.329	1.860	2.492	0.840	0.000	0.000	0.000	0.000	0.000	0.000	0.000	0.000	0.000	0.000	0.000	0.000	0.000	0.000	52	340	3709	3485	1.032	Error	Error	2491	1218	0	0	2433	1052	0	0	0	0
2	3	7	""	"YLR108C"	6330	26740	80	1146	2439	3379	107	113	49	96	94	0	940	1933	2466	70	78	34	100	98	0	0	0	0	0	0	0	0	0	0	0	0	0	0	0	0	0	0	0	1.194	1.252	1.032	1.030	1.829	1.368	0.849	0.000	0.000	0.000	0.000	0.000	0.000	0.000	0.000	0.000	0.000	0.000	0.000	0.000	0.000	52	340	1909	4195	0.256	Error	Error	1039	870	0	0	2332	1863	0	0	0	0
2	4	7	""	"YLR046C"	6530	26740	80	1247	2874	3385	109	120	65	100	96	0	643	1133	1147	70	79	38	92	86	0	0	0	0	0	0	0	0	0	0	0	0	0	0	0	0	0	0	0	1.986	2.601	2.627	2.710	2.345	2.939	0.904	0.000	0.000	0.000	0.000	0.000	0.000	0.000	0.000	0.000	0.000	0.000	0.000	0.000	0.000	52	340	1711	3828	0.990	Error	Error	1138	573	0	0	2765	1063	0	0	0	0
2	5	7	"BOS1"	"YLR078C"	6740	26740	80	3346	3079	1099	103	113	60	100	100	0	4136	3964	985	68	78	44	100	100	0	0	0	0	0	0	0	0	0	0	0	0	0	0	0	0	0	0	0	0.797	0.764	0.757	0.725	1.542	0.788	0.841	0.000	0.000	0.000	0.000	0.000	0.000	0.000	0.000	0.000	0.000	0.000	0.000	0.000	0.000	52	340	7311	6872	-0.327	Error	Error	3243	4068	0	0	2976	3896	0	0	0	0
2	6	7	""	"YLR110C"	6940	26740	90	2503	2338	1092	108	113	49	100	100	0	959	943	367	67	78	40	98	98	0	0	0	0	0	0	0	0	0	0	0	0	0	0	0	0	0	0	0	2.685	2.546	2.414	2.424	1.641	2.806	0.846	0.000	0.000	0.000	0.000	0.000	0.000	0.000	0.000	0.000	0.000	0.000	0.000	0.000	0.000	52	420	3287	3106	1.425	Error	Error	2395	892	0	0	2230	876	0	0	0	0
2	7	7	""	"YLR423C"	7140	26740	80	3984	4291	2342	103	118	64	100	100	0	5818	6271	2779	71	82	43	100	100	0	0	0	0	0	0	0	0	0	0	0	0	0	0	0	0	0	0	0	0.675	0.675	0.639	0.634	1.670	0.679	0.859	0.000	0.000	0.000	0.000	0.000	0.000	0.000	0.000	0.000	0.000	0.000	0.000	0.000	0.000	52	340	9628	10388	-0.566	Error	Error	3881	5747	0	0	4188	6200	0	0	0	0
2	8	7	""	"YLR455W"	7350	26740	80	3318	3988	2683	110	119	57	100	100	0	2849	3272	1870	70	80	42	100	100	0	0	0	0	0	0	0	0	0	0	0	0	0	0	0	0	0	0	0	1.154	1.211	1.241	1.139	1.799	1.295	0.832	0.000	0.000	0.000	0.000	0.000	0.000	0.000	0.000	0.000	0.000	0.000	0.000	0.000	0.000	52	340	5987	7080	0.207	Error	Error	3208	2779	0	0	3878	3202	0	0	0	0
2	9	7	"PSP2"	"YML017W"	7530	26740	50	244	317	237	102	111	54	83	50	0	248	278	186	66	73	30	91	66	0	0	0	0	0	0	0	0	0	0	0	0	0	0	0	0	0	0	0	0.780	1.014	0.933	0.839	2.724	1.239	0.454	0.000	0.000	0.000	0.000	0.000	0.000	0.000	0.000	0.000	0.000	0.000	0.000	0.000	0.000	12	104	324	427	-0.358	Error	Error	142	182	0	0	215	212	0	0	0	0
2	10	7	"TUS1"	"YLR425W"	7730	26740	70	2769	5349	5584	109	118	60	100	100	0	1530	2527	2205	68	76	61	100	100	0	0	0	0	0	0	0	0	0	0	0	0	0	0	0	0	0	0	0	1.819	2.131	1.798	1.663	2.029	2.433	0.848	0.000	0.000	0.000	0.000	0.000	0.000	0.000	0.000	0.000	0.000	0.000	0.000	0.000	0.000	32	236	4122	7699	0.863	Error	Error	2660	1462	0	0	5240	2459	0	0	0	0
2	11	7	"NBP1"	"YLR457C"	7930	26740	80	4107	4793	3547	101	111	66	100	100	0	4781	6160	4534	66	71	25	98	98	0	0	0	0	0	0	0	0	0	0	0	0	0	0	0	0	0	0	0	0.850	0.770	0.805	0.885	2.593	0.766	0.916	0.000	0.000	0.000	0.000	0.000	0.000	0.000	0.000	0.000	0.000	0.000	0.000	0.000	0.000	52	340	8721	10786	-0.235	Error	Error	4006	4715	0	0	4692	6094	0	0	0	0
2	12	7	"OST6"	"YML019W"	8140	26740	80	4779	4674	1772	96	116	207	100	100	0	7527	7228	1861	63	72	36	100	100	0	0	0	0	0	0	0	0	0	0	0	0	0	0	0	0	0	0	0	0.627	0.639	0.642	0.610	1.366	0.659	0.874	0.000	0.000	0.000	0.000	0.000	0.000	0.000	0.000	0.000	0.000	0.000	0.000	0.000	0.000	52	340	12147	11743	-0.673	Error	Error	4683	7464	0	0	4578	7165	0	0	0	0
2	13	7	""	"YLR427W"	8340	26740	80	8028	7699	3389	99	107	49	100	100	0	3532	3011	1521	63	70	36	94	94	0	0	0	0	0	0	0	0	0	0	0	0	0	0	0	0	0	0	0	2.286	2.578	2.554	3.168	1.990	2.574	0.903	0.000	0.000	0.000	0.000	0.000	0.000	0.000	0.000	0.000	0.000	0.000	0.000	0.000	0.000	52	340	11398	10548	1.193	Error	Error	7929	3469	0	0	7600	2948	0	0	0	0
2	14	7	"CDC91"	"YLR459W"	8540	26740	80	7882	7482	2910	106	111	51	100	100	0	8397	7339	2632	66	72	29	100	100	0	0	0	0	0	0	0	0	0	0	0	0	0	0	0	0	0	0	0	0.933	1.014	1.038	1.023	1.979	1.026	0.891	0.000	0.000	0.000	0.000	0.000	0.000	0.000	0.000	0.000	0.000	0.000	0.000	0.000	0.000	52	340	16107	14649	-0.099	Error	Error	7776	8331	0	0	7376	7273	0	0	0	0
2	15	7	"UNG1"	"YML021C"	8740	26740	80	6821	6308	2206	102	108	47	100	100	0	4707	4318	1163	63	69	27	100	100	0	0	0	0	0	0	0	0	0	0	0	0	0	0	0	0	0	0	0	1.447	1.459	1.451	1.409	1.495	1.573	0.858	0.000	0.000	0.000	0.000	0.000	0.000	0.000	0.000	0.000	0.000	0.000	0.000	0.000	0.000	52	340	11363	10461	0.533	Error	Error	6719	4644	0	0	6206	4255	0	0	0	0
2	16	7	"CRN1"	"YLR429W"	8940	26740	80	13945	13229	2719	101	110	51	100	100	0	5001	4619	1213	67	74	31	100	100	0	0	0	0	0	0	0	0	0	0	0	0	0	0	0	0	0	0	0	2.806	2.884	2.927	3.005	1.471	2.942	0.907	0.000	0.000	0.000	0.000	0.000	0.000	0.000	0.000	0.000	0.000	0.000	0.000	0.000	0.000	52	340	18778	17680	1.488	Error	Error	13844	4934	0	0	13128	4552	0	0	0	0
2	17	7	"PAU4"	"YLR461W"	9150	26740	90	10231	9350	2607	104	113	57	100	100	0	10195	10130	1739	70	78	35	100	100	0	0	0	0	0	0	0	0	0	0	0	0	0	0	0	0	0	0	0	1.000	0.919	0.957	0.881	1.371	0.947	0.884	0.000	0.000	0.000	0.000	0.000	0.000	0.000	0.000	0.000	0.000	0.000	0.000	0.000	0.000	52	420	20252	19306	0.000	Error	Error	10127	10125	0	0	9246	10060	0	0	0	0
2	18	7	""	"YML023C"	9340	26740	90	6160	5811	1869	105	113	55	100	100	0	6675	5936	2330	68	75	34	100	100	0	0	0	0	0	0	0	0	0	0	0	0	0	0	0	0	0	0	0	0.916	0.972	1.012	1.088	1.999	0.917	0.855	0.000	0.000	0.000	0.000	0.000	0.000	0.000	0.000	0.000	0.000	0.000	0.000	0.000	0.000	52	420	12662	11574	-0.126	Error	Error	6055	6607	0	0	5706	5868	0	0	0	0
2	19	7	""	"YMR187C"	9560	26740	70	1479	2986	3124	108	118	66	100	96	0	4505	5278	4717	63	72	48	100	100	0	0	0	0	0	0	0	0	0	0	0	0	0	0	0	0	0	0	0	0.309	0.552	0.452	0.467	1.942	0.573	0.771	0.000	0.000	0.000	0.000	0.000	0.000	0.000	0.000	0.000	0.000	0.000	0.000	0.000	0.000	32	236	5813	8093	-1.696	Error	Error	1371	4442	0	0	2878	5215	0	0	0	0
2	20	7	"TRS130"	"YMR218C"	9740	26730	60	481	769	800	100	117	68	90	78	0	483	766	756	67	74	35	100	96	0	0	0	0	0	0	0	0	0	0	0	0	0	0	0	0	0	0	0	0.916	0.957	0.892	0.912	1.926	1.024	0.831	0.000	0.000	0.000	0.000	0.000	0.000	0.000	0.000	0.000	0.000	0.000	0.000	0.000	0.000	32	176	797	1368	-0.127	Error	Error	381	416	0	0	669	699	0	0	0	0
2	21	7	""	"YMR251W"	9940	26730	60	370	668	677	97	107	46	84	75	0	438	689	635	65	71	28	100	93	0	0	0	0	0	0	0	0	0	0	0	0	0	0	0	0	0	0	0	0.732	0.915	0.893	0.739	2.358	1.003	0.868	0.000	0.000	0.000	0.000	0.000	0.000	0.000	0.000	0.000	0.000	0.000	0.000	0.000	0.000	32	176	646	1195	-0.450	Error	Error	273	373	0	0	571	624	0	0	0	0
2	1	8	"GCV2"	"YMR189W"	5930	26940	60	375	699	787	114	119	51	87	75	0	650	991	948	66	76	41	100	100	0	0	0	0	0	0	0	0	0	0	0	0	0	0	0	0	0	0	0	0.447	0.632	0.467	0.463	2.366	0.745	0.835	0.000	0.000	0.000	0.000	0.000	0.000	0.000	0.000	0.000	0.000	0.000	0.000	0.000	0.000	32	176	845	1510	-1.162	Error	Error	261	584	0	0	585	925	0	0	0	0
2	2	8	"ERG8"	"YMR220W"	6140	26940	70	3764	5967	5521	110	120	53	100	100	0	6105	7388	5935	70	80	39	100	100	0	0	0	0	0	0	0	0	0	0	0	0	0	0	0	0	0	0	0	0.605	0.800	0.681	0.706	1.625	0.857	0.925	0.000	0.000	0.000	0.000	0.000	0.000	0.000	0.000	0.000	0.000	0.000	0.000	0.000	0.000	32	236	9689	13175	-0.724	Error	Error	3654	6035	0	0	5857	7318	0	0	0	0
2	3	8	""	"YMR252C"	6350	26950	80	1320	1909	1584	102	115	65	96	92	0	2811	3562	2566	70	80	41	100	100	0	0	0	0	0	0	0	0	0	0	0	0	0	0	0	0	0	0	0	0.444	0.517	0.453	0.420	1.999	0.540	0.876	0.000	0.000	0.000	0.000	0.000	0.000	0.000	0.000	0.000	0.000	0.000	0.000	0.000	0.000	52	340	3959	5299	-1.170	Error	Error	1218	2741	0	0	1807	3492	0	0	0	0
2	4	8	""	"YMR191W"	6540	26950	80	297	989	1823	101	112	72	78	57	0	258	538	826	66	75	41	98	82	0	0	0	0	0	0	0	0	0	0	0	0	0	0	0	0	0	0	0	1.021	1.881	1.196	1.236	2.439	2.293	0.821	0.000	0.000	0.000	0.000	0.000	0.000	0.000	0.000	0.000	0.000	0.000	0.000	0.000	0.000	52	340	388	1360	0.030	Error	Error	196	192	0	0	888	472	0	0	0	0
2	5	8	""	"YMR222C"	6740	26940	70	730	1545	1696	100	107	50	100	93	0	909	1502	1476	68	73	30	100	100	0	0	0	0	0	0	0	0	0	0	0	0	0	0	0	0	0	0	0	0.749	1.008	0.770	0.863	2.051	1.107	0.862	0.000	0.000	0.000	0.000	0.000	0.000	0.000	0.000	0.000	0.000	0.000	0.000	0.000	0.000	32	236	1471	2879	-0.417	Error	Error	630	841	0	0	1445	1434	0	0	0	0
2	6	8	""	"YMR254C"	6940	26940	80	1510	1684	1008	109	119	56	100	96	0	1852	2073	1298	70	84	47	98	94	0	0	0	0	0	0	0	0	0	0	0	0	0	0	0	0	0	0	0	0.786	0.786	0.761	0.853	2.580	0.766	0.814	0.000	0.000	0.000	0.000	0.000	0.000	0.000	0.000	0.000	0.000	0.000	0.000	0.000	0.000	52	340	3183	3578	-0.347	Error	Error	1401	1782	0	0	1575	2003	0	0	0	0
2	7	8	""	"YMR193C-A"	7130	26940	70	2689	2772	1808	119	123	55	100	93	0	926	974	605	70	83	44	96	93	0	0	0	0	0	0	0	0	0	0	0	0	0	0	0	0	0	0	0	3.002	2.935	2.801	2.771	1.929	3.112	0.870	0.000	0.000	0.000	0.000	0.000	0.000	0.000	0.000	0.000	0.000	0.000	0.000	0.000	0.000	32	236	3426	3557	1.586	Error	Error	2570	856	0	0	2653	904	0	0	0	0
2	8	8	"MRE11"	"YMR224C"	7340	26960	80	201	252	210	113	125	70	51	34	0	218	301	330	76	90	66	65	53	0	0	0	0	0	0	0	0	0	0	0	0	0	0	0	0	0	0	0	0.620	0.618	0.856	0.719	2.869	0.575	0.506	0.000	0.000	0.000	0.000	0.000	0.000	0.000	0.000	0.000	0.000	0.000	0.000	0.000	0.000	52	340	230	364	-0.690	Error	Error	88	142	0	0	139	225	0	0	0	0
2	9	8	"COX7"	"YMR256C"	7540	26940	80	684	657	389	112	119	52	90	84	0	837	901	505	68	77	34	98	98	0	0	0	0	0	0	0	0	0	0	0	0	0	0	0	0	0	0	0	0.744	0.654	0.572	0.642	2.063	0.691	0.743	0.000	0.000	0.000	0.000	0.000	0.000	0.000	0.000	0.000	0.000	0.000	0.000	0.000	0.000	52	340	1341	1378	-0.427	Error	Error	572	769	0	0	545	833	0	0	0	0
2	10	8	"NAR1"	"YNL240C"	7730	26930	70	4094	4001	564	106	116	61	100	100	0	1319	1237	327	67	74	35	100	100	0	0	0	0	0	0	0	0	0	0	0	0	0	0	0	0	0	0	0	3.185	3.329	3.145	3.564	1.516	3.296	0.875	0.000	0.000	0.000	0.000	0.000	0.000	0.000	0.000	0.000	0.000	0.000	0.000	0.000	0.000	32	236	5240	5065	1.671	Error	Error	3988	1252	0	0	3895	1170	0	0	0	0
2	11	8	"SEC2"	"YNL272C"	7940	26940	80	5472	5555	2435	97	106	45	100	100	0	9307	7897	3343	66	71	26	100	100	0	0	0	0	0	0	0	0	0	0	0	0	0	0	0	0	0	0	0	0.582	0.697	0.730	0.755	1.917	0.681	0.859	0.000	0.000	0.000	0.000	0.000	0.000	0.000	0.000	0.000	0.000	0.000	0.000	0.000	0.000	52	340	14616	13289	-0.782	Error	Error	5375	9241	0	0	5458	7831	0	0	0	0
2	12	8	"YPT11"	"YNL304W"	8140	26940	80	6510	6225	1871	107	113	46	100	100	0	7223	6327	2582	66	75	37	98	98	0	0	0	0	0	0	0	0	0	0	0	0	0	0	0	0	0	0	0	0.895	0.977	0.969	1.118	1.913	0.930	0.861	0.000	0.000	0.000	0.000	0.000	0.000	0.000	0.000	0.000	0.000	0.000	0.000	0.000	0.000	52	340	13560	12379	-0.161	Error	Error	6403	7157	0	0	6118	6261	0	0	0	0
2	13	8	""	"YNL242W"	8340	26940	80	5495	6661	3969	103	109	47	100	100	0	9388	9677	5566	69	74	34	100	100	0	0	0	0	0	0	0	0	0	0	0	0	0	0	0	0	0	0	0	0.579	0.683	0.732	0.746	2.220	0.670	0.882	0.000	0.000	0.000	0.000	0.000	0.000	0.000	0.000	0.000	0.000	0.000	0.000	0.000	0.000	52	340	14711	16166	-0.789	Error	Error	5392	9319	0	0	6558	9608	0	0	0	0
2	14	8	""	"YNL274C"	8540	26940	80	5351	5346	1300	105	114	53	100	100	0	9099	8480	2493	70	75	30	100	100	0	0	0	0	0	0	0	0	0	0	0	0	0	0	0	0	0	0	0	0.581	0.623	0.636	0.689	1.848	0.593	0.868	0.000	0.000	0.000	0.000	0.000	0.000	0.000	0.000	0.000	0.000	0.000	0.000	0.000	0.000	52	340	14275	13651	-0.783	Error	Error	5246	9029	0	0	5241	8410	0	0	0	0
2	15	8	""	"YNL306W"	8750	26940	90	2839	2698	814	99	107	48	100	100	0	1981	1872	444	66	73	31	100	100	0	0	0	0	0	0	0	0	0	0	0	0	0	0	0	0	0	0	0	1.431	1.439	1.466	1.410	1.481	1.546	0.834	0.000	0.000	0.000	0.000	0.000	0.000	0.000	0.000	0.000	0.000	0.000	0.000	0.000	0.000	52	420	4655	4405	0.517	Error	Error	2740	1915	0	0	2599	1806	0	0	0	0
2	16	8	"SUI1"	"YNL244C"	8940	26940	90	1628	1564	647	103	109	53	100	100	0	906	805	327	66	74	32	100	98	0	0	0	0	0	0	0	0	0	0	0	0	0	0	0	0	0	0	0	1.815	1.977	1.981	2.056	1.741	2.076	0.828	0.000	0.000	0.000	0.000	0.000	0.000	0.000	0.000	0.000	0.000	0.000	0.000	0.000	0.000	52	420	2365	2200	0.860	Error	Error	1525	840	0	0	1461	739	0	0	0	0
2	17	8	""	"YNL276C"	9140	26940	80	2129	2463	1809	105	106	43	100	96	0	1420	1566	1169	67	72	25	94	92	0	0	0	0	0	0	0	0	0	0	0	0	0	0	0	0	0	0	0	1.496	1.573	1.542	1.774	2.854	1.599	0.802	0.000	0.000	0.000	0.000	0.000	0.000	0.000	0.000	0.000	0.000	0.000	0.000	0.000	0.000	52	340	3377	3857	0.581	Error	Error	2024	1353	0	0	2358	1499	0	0	0	0
2	18	8	"KRI1"	"YNL308C"	9340	26940	80	4744	5127	2834	97	102	44	100	100	0	7318	6504	3638	64	69	26	98	98	0	0	0	0	0	0	0	0	0	0	0	0	0	0	0	0	0	0	0	0.641	0.781	0.775	0.865	2.226	0.761	0.859	0.000	0.000	0.000	0.000	0.000	0.000	0.000	0.000	0.000	0.000	0.000	0.000	0.000	0.000	52	340	11901	11470	-0.642	Error	Error	4647	7254	0	0	5030	6440	0	0	0	0
2	19	8	""	"YNL246W"	9550	26950	100	4147	3686	1401	99	106	50	97	97	0	2810	2535	933	63	68	24	100	100	0	0	0	0	0	0	0	0	0	0	0	0	0	0	0	0	0	0	0	1.474	1.451	1.398	1.353	1.913	1.505	0.876	0.000	0.000	0.000	0.000	0.000	0.000	0.000	0.000	0.000	0.000	0.000	0.000	0.000	0.000	80	552	6795	6059	0.559	Error	Error	4048	2747	0	0	3587	2472	0	0	0	0
2	20	8	""	"YNL278W"	9740	26930	70	13785	13674	3610	113	403	1736	100	100	0	5643	5331	1234	65	224	852	100	96	0	0	0	0	0	0	0	0	0	0	0	0	0	0	0	0	0	0	0	2.451	2.575	2.599	2.581	1.279	2.555	0.895	0.000	0.000	0.000	0.000	0.000	0.000	0.000	0.000	0.000	0.000	0.000	0.000	0.000	0.000	32	236	19250	18827	1.293	Error	Error	13672	5578	0	0	13561	5266	0	0	0	0
2	21	8	""	"YNL310C"	9950	26950	100	3938	3385	1567	106	146	415	88	83	0	2476	2144	1014	64	87	191	86	86	0	0	0	0	0	0	0	0	0	0	0	0	0	0	0	0	0	0	0	1.589	1.576	1.552	1.633	2.054	1.600	0.848	0.000	0.000	0.000	0.000	0.000	0.000	0.000	0.000	0.000	0.000	0.000	0.000	0.000	0.000	80	538	6244	5359	0.668	Error	Error	3832	2412	0	0	3279	2080	0	0	0	0
2	1	9	""	"YOR042W"	5930	27150	80	11354	10516	4110	102	111	53	100	100	0	5076	4529	1536	65	70	26	100	100	0	0	0	0	0	0	0	0	0	0	0	0	0	0	0	0	0	0	0	2.245	2.333	2.295	2.460	1.946	2.506	0.869	0.000	0.000	0.000	0.000	0.000	0.000	0.000	0.000	0.000	0.000	0.000	0.000	0.000	0.000	52	340	16263	14878	1.167	Error	Error	11252	5011	0	0	10414	4464	0	0	0	0
2	2	9	"CDC21"	"YOR074C"	6140	27160	100	5265	5079	2449	103	113	60	98	97	0	8086	7192	2996	68	75	34	100	100	0	0	0	0	0	0	0	0	0	0	0	0	0	0	0	0	0	0	0	0.644	0.698	0.675	0.673	1.816	0.713	0.881	0.000	0.000	0.000	0.000	0.000	0.000	0.000	0.000	0.000	0.000	0.000	0.000	0.000	0.000	80	543	13180	12100	-0.635	Error	Error	5162	8018	0	0	4976	7124	0	0	0	0
2	3	9	"VAM3"	"YOR106W"	6340	27150	80	6376	5708	2754	99	105	51	100	98	0	2986	2739	1075	69	76	35	100	100	0	0	0	0	0	0	0	0	0	0	0	0	0	0	0	0	0	0	0	2.152	2.101	2.162	1.914	1.841	2.344	0.861	0.000	0.000	0.000	0.000	0.000	0.000	0.000	0.000	0.000	0.000	0.000	0.000	0.000	0.000	52	340	9194	8279	1.106	Error	Error	6277	2917	0	0	5609	2670	0	0	0	0
2	4	9	""	"YOR044W"	6530	27140	70	1606	1680	748	103	130	119	96	93	0	2999	2738	1360	67	126	334	96	87	0	0	0	0	0	0	0	0	0	0	0	0	0	0	0	0	0	0	0	0.513	0.590	0.547	0.636	2.625	0.559	0.797	0.000	0.000	0.000	0.000	0.000	0.000	0.000	0.000	0.000	0.000	0.000	0.000	0.000	0.000	32	236	4435	4248	-0.964	Error	Error	1503	2932	0	0	1577	2671	0	0	0	0
2	5	9	""	"YOR076C"	6740	27150	90	6216	6088	1977	101	108	50	100	100	0	7700	7274	1885	67	76	36	100	100	0	0	0	0	0	0	0	0	0	0	0	0	0	0	0	0	0	0	0	0.801	0.831	0.860	0.804	1.411	0.840	0.863	0.000	0.000	0.000	0.000	0.000	0.000	0.000	0.000	0.000	0.000	0.000	0.000	0.000	0.000	52	420	13748	13194	-0.320	Error	Error	6115	7633	0	0	5987	7207	0	0	0	0
2	6	9	""	"YOR108W"	6930	27140	70	7598	7943	4084	112	193	648	100	100	0	2667	3086	1788	72	126	377	93	90	0	0	0	0	0	0	0	0	0	0	0	0	0	0	0	0	0	0	0	2.885	2.598	2.725	2.822	1.969	2.549	0.864	0.000	0.000	0.000	0.000	0.000	0.000	0.000	0.000	0.000	0.000	0.000	0.000	0.000	0.000	32	236	10081	10845	1.528	Error	Error	7486	2595	0	0	7831	3014	0	0	0	0
2	7	9	"DBP5"	"YOR046C"	7140	27150	90	4743	4674	1260	107	111	51	100	100	0	8463	8531	1342	67	77	41	100	100	0	0	0	0	0	0	0	0	0	0	0	0	0	0	0	0	0	0	0	0.552	0.540	0.540	0.520	1.307	0.554	0.878	0.000	0.000	0.000	0.000	0.000	0.000	0.000	0.000	0.000	0.000	0.000	0.000	0.000	0.000	52	420	13032	13031	-0.857	Error	Error	4636	8396	0	0	4567	8464	0	0	0	0
2	8	9	""	"YOR078W"	7340	27140	80	4752	4518	1584	104	114	59	100	100	0	3982	3271	1460	70	81	45	98	98	0	0	0	0	0	0	0	0	0	0	0	0	0	0	0	0	0	0	0	1.188	1.379	1.310	1.654	2.383	1.344	0.811	0.000	0.000	0.000	0.000	0.000	0.000	0.000	0.000	0.000	0.000	0.000	0.000	0.000	0.000	52	340	8560	7615	0.249	Error	Error	4648	3912	0	0	4414	3201	0	0	0	0
2	9	9	""	"YOR110W"	7540	27150	60	253	279	121	105	110	50	84	71	0	277	333	212	68	76	32	96	90	0	0	0	0	0	0	0	0	0	0	0	0	0	0	0	0	0	0	0	0.708	0.657	0.863	0.589	3.204	0.585	0.513	0.000	0.000	0.000	0.000	0.000	0.000	0.000	0.000	0.000	0.000	0.000	0.000	0.000	0.000	32	176	357	439	-0.498	Error	Error	148	209	0	0	174	265	0	0	0	0
2	10	9	"RAT1"	"YOR048C"	7730	27130	150	124	161	144	105	114	59	31	14	0	72	103	89	66	73	30	29	18	0	0	0	0	0	0	0	0	0	0	0	0	0	0	0	0	0	0	0	3.167	1.514	1.846	1.789	3.404	2.233	0.353	0.000	0.000	0.000	0.000	0.000	0.000	0.000	0.000	0.000	0.000	0.000	0.000	0.000	0.000	156	1031	25	93	1.663	Error	Error	19	6	0	0	56	37	0	0	-50	0
2	11	9	""	"YOR080W"	7930	27140	70	8962	8658	2488	113	134	106	100	100	0	10012	9355	2724	69	101	200	100	100	0	0	0	0	0	0	0	0	0	0	0	0	0	0	0	0	0	0	0	0.890	0.920	0.910	0.926	1.368	0.893	0.891	0.000	0.000	0.000	0.000	0.000	0.000	0.000	0.000	0.000	0.000	0.000	0.000	0.000	0.000	32	236	18792	17831	-0.168	Error	Error	8849	9943	0	0	8545	9286	0	0	0	0
2	12	9	""	"YOR112W"	8150	27140	80	9898	8894	3850	103	112	56	100	100	0	6815	6100	2285	63	70	31	100	100	0	0	0	0	0	0	0	0	0	0	0	0	0	0	0	0	0	0	0	1.451	1.456	1.448	1.517	1.828	1.528	0.861	0.000	0.000	0.000	0.000	0.000	0.000	0.000	0.000	0.000	0.000	0.000	0.000	0.000	0.000	52	340	16547	14828	0.537	Error	Error	9795	6752	0	0	8791	6037	0	0	0	0
2	13	9	"PHO85"	"YPL031C"	8340	27140	80	6437	6486	3967	102	109	49	100	100	0	2278	3549	6449	64	70	28	100	100	0	0	0	0	0	0	0	0	0	0	0	0	0	0	0	0	0	0	0	2.861	1.832	2.819	2.818	1.979	0.943	0.472	0.000	0.000	0.000	0.000	0.000	0.000	0.000	0.000	0.000	0.000	0.000	0.000	0.000	0.000	52	340	8549	9869	1.517	Error	Error	6335	2214	0	0	6384	3485	0	0	0	0
2	14	9	""	"YPL063W"	8540	27140	80	3434	4205	2670	106	114	62	100	100	0	1513	1767	1156	67	77	41	94	92	0	0	0	0	0	0	0	0	0	0	0	0	0	0	0	0	0	0	0	2.302	2.411	2.313	2.585	2.147	2.472	0.893	0.000	0.000	0.000	0.000	0.000	0.000	0.000	0.000	0.000	0.000	0.000	0.000	0.000	0.000	52	340	4774	5799	1.203	Error	Error	3328	1446	0	0	4099	1700	0	0	0	0
2	15	9	""	"YPL095C"	8730	27140	70	5703	6745	4233	109	146	165	100	100	0	6501	5929	4187	73	109	163	96	96	0	0	0	0	0	0	0	0	0	0	0	0	0	0	0	0	0	0	0	0.870	1.133	1.245	1.385	1.975	1.062	0.909	0.000	0.000	0.000	0.000	0.000	0.000	0.000	0.000	0.000	0.000	0.000	0.000	0.000	0.000	32	236	12022	12492	-0.200	Error	Error	5594	6428	0	0	6636	5856	0	0	0	0
2	16	9	""	"YPL033C"	8940	27150	80	2429	2152	1038	104	111	64	98	96	0	4858	4252	2100	66	83	104	94	94	0	0	0	0	0	0	0	0	0	0	0	0	0	0	0	0	0	0	0	0.485	0.489	0.497	0.549	2.740	0.464	0.800	0.000	0.000	0.000	0.000	0.000	0.000	0.000	0.000	0.000	0.000	0.000	0.000	0.000	0.000	52	340	7117	6234	-1.043	Error	Error	2325	4792	0	0	2048	4186	0	0	0	0
2	17	9	"VPS28"	"YPL065W"	9140	27140	80	5889	5756	1794	104	110	51	100	100	0	5625	5070	1900	67	71	25	100	100	0	0	0	0	0	0	0	0	0	0	0	0	0	0	0	0	0	0	0	1.041	1.130	1.071	1.238	2.015	1.094	0.841	0.000	0.000	0.000	0.000	0.000	0.000	0.000	0.000	0.000	0.000	0.000	0.000	0.000	0.000	52	340	11343	10655	0.058	Error	Error	5785	5558	0	0	5652	5003	0	0	0	0
2	18	9	"MSY1"	"YPL097W"	9340	27140	80	9521	8405	3897	98	104	45	100	100	0	6884	6130	2557	64	69	24	100	100	0	0	0	0	0	0	0	0	0	0	0	0	0	0	0	0	0	0	0	1.382	1.369	1.406	1.348	2.094	1.437	0.856	0.000	0.000	0.000	0.000	0.000	0.000	0.000	0.000	0.000	0.000	0.000	0.000	0.000	0.000	52	340	16243	14373	0.466	Error	Error	9423	6820	0	0	8307	6066	0	0	0	0
2	19	9	""	"YPL035C"	9540	27140	70	2087	2310	1609	103	111	51	93	93	0	3198	3008	1788	63	72	40	100	100	0	0	0	0	0	0	0	0	0	0	0	0	0	0	0	0	0	0	0	0.633	0.749	0.686	0.596	2.248	0.789	0.733	0.000	0.000	0.000	0.000	0.000	0.000	0.000	0.000	0.000	0.000	0.000	0.000	0.000	0.000	32	236	5119	5152	-0.660	Error	Error	1984	3135	0	0	2207	2945	0	0	0	0
2	20	9	""	"YPL067C"	9730	27130	70	2904	2822	559	107	118	66	100	100	0	1289	1221	489	67	79	85	93	90	0	0	0	0	0	0	0	0	0	0	0	0	0	0	0	0	0	0	0	2.289	2.353	2.444	2.919	2.493	2.238	0.806	0.000	0.000	0.000	0.000	0.000	0.000	0.000	0.000	0.000	0.000	0.000	0.000	0.000	0.000	32	236	4019	3869	1.195	Error	Error	2797	1222	0	0	2715	1154	0	0	0	0
2	21	9	""	"YPL099C"	9950	27140	80	3027	2865	1511	104	113	53	100	100	0	3041	2670	1178	65	71	33	100	98	0	0	0	0	0	0	0	0	0	0	0	0	0	0	0	0	0	0	0	0.982	1.060	0.950	0.989	2.127	1.129	0.745	0.000	0.000	0.000	0.000	0.000	0.000	0.000	0.000	0.000	0.000	0.000	0.000	0.000	0.000	52	340	5899	5366	-0.026	Error	Error	2923	2976	0	0	2761	2605	0	0	0	0
2	1	10	"EGD1"	"YPL037C"	5940	27340	70	2434	2384	684	99	110	61	100	100	0	1665	1581	369	61	76	82	100	100	0	0	0	0	0	0	0	0	0	0	0	0	0	0	0	0	0	0	0	1.456	1.503	1.433	1.479	1.370	1.545	0.842	0.000	0.000	0.000	0.000	0.000	0.000	0.000	0.000	0.000	0.000	0.000	0.000	0.000	0.000	32	236	3939	3805	0.542	Error	Error	2335	1604	0	0	2285	1520	0	0	0	0
2	2	10	"BTS1"	"YPL069C"	6130	27340	70	3870	4102	1567	104	158	432	96	96	0	9003	7770	3736	65	237	1038	87	87	0	0	0	0	0	0	0	0	0	0	0	0	0	0	0	0	0	0	0	0.421	0.519	0.473	0.596	2.387	0.473	0.812	0.000	0.000	0.000	0.000	0.000	0.000	0.000	0.000	0.000	0.000	0.000	0.000	0.000	0.000	32	236	12704	11703	-1.247	Error	Error	3766	8938	0	0	3998	7705	0	0	0	0
2	3	10	""	"YPL101W"	6340	27340	70	9243	9185	3673	102	182	535	100	96	0	3972	3635	1285	64	112	367	100	100	0	0	0	0	0	0	0	0	0	0	0	0	0	0	0	0	0	0	0	2.339	2.544	2.485	2.423	1.778	2.612	0.839	0.000	0.000	0.000	0.000	0.000	0.000	0.000	0.000	0.000	0.000	0.000	0.000	0.000	0.000	32	236	13049	12654	1.226	Error	Error	9141	3908	0	0	9083	3571	0	0	0	0
2	4	10	"RPS23B"	"YPR132W"	6530	27340	70	5924	5332	1674	103	131	152	100	100	0	5901	5642	1737	66	105	226	100	100	0	0	0	0	0	0	0	0	0	0	0	0	0	0	0	0	0	0	0	0.998	0.938	0.898	0.948	1.603	0.898	0.835	0.000	0.000	0.000	0.000	0.000	0.000	0.000	0.000	0.000	0.000	0.000	0.000	0.000	0.000	32	236	11656	10805	-0.003	Error	Error	5821	5835	0	0	5229	5576	0	0	0	0
2	5	10	"KIM3"	"YPR164W"	6740	27350	60	274	275	128	99	102	42	81	71	0	331	391	179	63	68	23	100	100	0	0	0	0	0	0	0	0	0	0	0	0	0	0	0	0	0	0	0	0.653	0.537	0.533	0.435	2.966	0.534	0.514	0.000	0.000	0.000	0.000	0.000	0.000	0.000	0.000	0.000	0.000	0.000	0.000	0.000	0.000	32	176	443	504	-0.615	Error	Error	175	268	0	0	176	328	0	0	0	0
2	6	10	""	"YPR196W"	6940	27350	110	5317	5206	2680	101	113	78	96	96	0	4486	4065	2154	65	73	52	95	93	0	0	0	0	0	0	0	0	0	0	0	0	0	0	0	0	0	0	0	1.180	1.276	1.215	1.476	2.696	1.293	0.868	0.000	0.000	0.000	0.000	0.000	0.000	0.000	0.000	0.000	0.000	0.000	0.000	0.000	0.000	80	625	9637	9105	0.239	Error	Error	5216	4421	0	0	5105	4000	0	0	0	0
2	7	10	"MSS18"	"YPR134W"	7140	27350	80	3648	3624	2137	104	110	49	100	100	0	2272	2421	1409	65	72	30	96	92	0	0	0	0	0	0	0	0	0	0	0	0	0	0	0	0	0	0	0	1.606	1.494	1.530	1.716	2.570	1.514	0.890	0.000	0.000	0.000	0.000	0.000	0.000	0.000	0.000	0.000	0.000	0.000	0.000	0.000	0.000	52	340	5751	5876	0.683	Error	Error	3544	2207	0	0	3520	2356	0	0	0	0
2	8	10	"MRP2"	"YPR166C"	7340	27340	70	611	851	638	94	104	50	93	90	0	639	839	708	65	76	54	96	90	0	0	0	0	0	0	0	0	0	0	0	0	0	0	0	0	0	0	0	0.901	0.978	0.896	1.093	2.366	0.867	0.696	0.000	0.000	0.000	0.000	0.000	0.000	0.000	0.000	0.000	0.000	0.000	0.000	0.000	0.000	32	236	1091	1531	-0.151	Error	Error	517	574	0	0	757	774	0	0	0	0
2	9	10	"SGE1"	"YPR198W"	7550	27350	80	5405	6092	4321	105	109	47	100	100	0	9033	9219	5773	65	73	36	100	100	0	0	0	0	0	0	0	0	0	0	0	0	0	0	0	0	0	0	0	0.591	0.654	0.609	0.622	2.267	0.675	0.837	0.000	0.000	0.000	0.000	0.000	0.000	0.000	0.000	0.000	0.000	0.000	0.000	0.000	0.000	52	340	14268	15141	-0.759	Error	Error	5300	8968	0	0	5987	9154	0	0	0	0
2	10	10	""	"YPR136C"	7750	27340	70	327	527	601	107	118	66	87	71	0	405	603	558	66	74	31	100	93	0	0	0	0	0	0	0	0	0	0	0	0	0	0	0	0	0	0	0	0.649	0.782	0.543	0.725	2.582	0.958	0.372	0.000	0.000	0.000	0.000	0.000	0.000	0.000	0.000	0.000	0.000	0.000	0.000	0.000	0.000	32	236	559	957	-0.624	Error	Error	220	339	0	0	420	537	0	0	0	0
2	11	10	"NUT2"	"YPR168W"	7940	27350	60	166	194	77	105	115	52	56	31	0	227	256	143	65	71	30	90	81	0	0	0	0	0	0	0	0	0	0	0	0	0	0	0	0	0	0	0	0.377	0.466	0.447	0.416	2.527	0.428	0.303	0.000	0.000	0.000	0.000	0.000	0.000	0.000	0.000	0.000	0.000	0.000	0.000	0.000	0.000	32	176	223	280	-1.409	Error	Error	61	162	0	0	89	191	0	0	0	0
2	12	10	"ARR2"	"YPR200C"	8150	27350	70	1887	1897	1545	102	106	46	100	100	0	800	1149	801	67	75	56	100	96	0	0	0	0	0	0	0	0	0	0	0	0	0	0	0	0	0	0	0	2.435	1.659	1.515	1.399	2.026	1.846	0.783	0.000	0.000	0.000	0.000	0.000	0.000	0.000	0.000	0.000	0.000	0.000	0.000	0.000	0.000	32	236	2518	2877	1.284	Error	Error	1785	733	0	0	1795	1082	0	0	0	0
2	13	10	"MEP3"	"YPR138C"	8340	27340	80	8330	7501	4194	105	111	50	100	100	0	3192	2793	1798	63	66	22	96	94	0	0	0	0	0	0	0	0	0	0	0	0	0	0	0	0	0	0	0	2.629	2.709	2.728	3.673	2.929	2.704	0.825	0.000	0.000	0.000	0.000	0.000	0.000	0.000	0.000	0.000	0.000	0.000	0.000	0.000	0.000	52	340	11354	10126	1.394	Error	Error	8225	3129	0	0	7396	2730	0	0	0	0
2	14	10	""	"YPR170C"	8540	27340	70	1747	1969	1299	108	116	54	96	96	0	1119	1274	847	64	72	50	100	100	0	0	0	0	0	0	0	0	0	0	0	0	0	0	0	0	0	0	0	1.554	1.538	1.517	1.546	2.114	1.559	0.760	0.000	0.000	0.000	0.000	0.000	0.000	0.000	0.000	0.000	0.000	0.000	0.000	0.000	0.000	32	236	2694	3071	0.636	Error	Error	1639	1055	0	0	1861	1210	0	0	0	0
2	15	10	""	"YPR202W"	8730	27330	70	33156	36485	13314	115	252	821	100	100	0	14435	13724	6113	72	139	342	100	100	0	0	0	0	0	0	0	0	0	0	0	0	0	0	0	0	0	0	0	2.300	2.664	2.619	2.841	1.785	2.657	0.824	0.000	0.000	0.000	0.000	0.000	0.000	0.000	0.000	0.000	0.000	0.000	0.000	0.000	0.000	32	236	47404	50022	1.202	Error	Error	33041	14363	0	0	36370	13652	0	0	0	0
2	16	10	""	"IntYBR048W"	8950	27350	80	3019	2870	1382	103	112	56	100	100	0	3649	3238	1643	67	79	52	100	100	0	0	0	0	0	0	0	0	0	0	0	0	0	0	0	0	0	0	0	0.814	0.873	0.848	0.920	1.669	0.856	0.907	0.000	0.000	0.000	0.000	0.000	0.000	0.000	0.000	0.000	0.000	0.000	0.000	0.000	0.000	52	340	6498	5938	-0.297	Error	Error	2916	3582	0	0	2767	3171	0	0	0	0
2	17	10	""	"LSR1"	9140	27340	70	3645	3585	1594	105	112	52	100	100	0	1517	1555	482	65	71	31	100	100	0	0	0	0	0	0	0	0	0	0	0	0	0	0	0	0	0	0	0	2.438	2.336	2.241	2.167	1.486	2.678	0.870	0.000	0.000	0.000	0.000	0.000	0.000	0.000	0.000	0.000	0.000	0.000	0.000	0.000	0.000	32	236	4992	4970	1.286	Error	Error	3540	1452	0	0	3480	1490	0	0	0	0
2	18	10	""	"YCLWTy5-1C"	9340	27340	70	6364	6336	2340	103	113	58	100	100	0	2958	2751	1038	65	72	37	100	100	0	0	0	0	0	0	0	0	0	0	0	0	0	0	0	0	0	0	0	2.164	2.321	2.349	2.386	1.403	2.320	0.887	0.000	0.000	0.000	0.000	0.000	0.000	0.000	0.000	0.000	0.000	0.000	0.000	0.000	0.000	32	236	9154	8919	1.114	Error	Error	6261	2893	0	0	6233	2686	0	0	0	0
2	19	10	""	"IntYCR097W-A2"	9540	27350	80	312	623	782	110	113	45	71	65	0	260	582	731	65	69	26	94	88	0	0	0	0	0	0	0	0	0	0	0	0	0	0	0	0	0	0	0	1.036	0.992	1.010	0.861	3.033	1.056	0.801	0.000	0.000	0.000	0.000	0.000	0.000	0.000	0.000	0.000	0.000	0.000	0.000	0.000	0.000	52	340	397	1030	0.051	Error	Error	202	195	0	0	513	517	0	0	0	0
2	20	10	""	"IntYDL191W"	9730	27340	70	222	220	105	104	115	61	68	46	0	177	246	179	65	74	34	84	62	0	0	0	0	0	0	0	0	0	0	0	0	0	0	0	0	0	0	0	1.054	0.641	0.633	0.805	2.250	0.664	0.454	0.000	0.000	0.000	0.000	0.000	0.000	0.000	0.000	0.000	0.000	0.000	0.000	0.000	0.000	32	236	230	297	0.075	Error	Error	118	112	0	0	116	181	0	0	0	0
2	21	10	""	"CEN4"	9960	27350	80	180	204	89	106	115	54	69	34	0	368	376	166	70	78	31	94	90	0	0	0	0	0	0	0	0	0	0	0	0	0	0	0	0	0	0	0	0.248	0.320	0.327	0.350	2.229	0.343	0.412	0.000	0.000	0.000	0.000	0.000	0.000	0.000	0.000	0.000	0.000	0.000	0.000	0.000	0.000	52	332	372	404	-2.010	Error	Error	74	298	0	0	98	306	0	0	0	0
2	1	11	""	"YDRWdelta31"	5930	27540	150	104	120	80	99	108	55	17	7	0	70	98	101	62	71	45	16	10	0	0	0	0	0	0	0	0	0	0	0	0	0	0	0	0	0	0	0	0.625	0.583	1.388	1.593	3.646	1.056	0.254	0.000	0.000	0.000	0.000	0.000	0.000	0.000	0.000	0.000	0.000	0.000	0.000	0.000	0.000	156	1086	13	57	-0.678	Error	Error	5	8	0	0	21	36	0	0	-50	0
2	2	11	""	"YELCtau1"	6140	27550	80	761	1201	990	97	103	48	100	96	0	1295	1938	1546	60	66	26	100	100	0	0	0	0	0	0	0	0	0	0	0	0	0	0	0	0	0	0	0	0.538	0.588	0.534	0.525	1.830	0.590	0.850	0.000	0.000	0.000	0.000	0.000	0.000	0.000	0.000	0.000	0.000	0.000	0.000	0.000	0.000	52	340	1899	2982	-0.895	Error	Error	664	1235	0	0	1104	1878	0	0	0	0
2	3	11	""	"YER039C-A"	6340	27550	80	2157	2750	1684	98	105	54	100	100	0	1306	1391	748	63	70	30	100	100	0	0	0	0	0	0	0	0	0	0	0	0	0	0	0	0	0	0	0	1.656	1.997	2.092	1.963	1.544	2.170	0.875	0.000	0.000	0.000	0.000	0.000	0.000	0.000	0.000	0.000	0.000	0.000	0.000	0.000	0.000	52	340	3302	3980	0.728	Error	Error	2059	1243	0	0	2652	1328	0	0	0	0
2	4	11	""	"YFLWtau1"	6540	27550	80	1345	1433	868	98	104	47	100	100	0	5968	6928	3084	67	72	29	100	100	0	0	0	0	0	0	0	0	0	0	0	0	0	0	0	0	0	0	0	0.211	0.195	0.173	0.173	1.569	0.203	0.863	0.000	0.000	0.000	0.000	0.000	0.000	0.000	0.000	0.000	0.000	0.000	0.000	0.000	0.000	52	340	7148	8196	-2.242	Error	Error	1247	5901	0	0	1335	6861	0	0	0	0
2	5	11	""	"YFRCdelta9"	6740	27550	80	686	945	757	100	108	52	98	92	0	610	866	724	64	70	28	100	98	0	0	0	0	0	0	0	0	0	0	0	0	0	0	0	0	0	0	0	1.073	1.054	1.046	1.044	1.860	1.048	0.815	0.000	0.000	0.000	0.000	0.000	0.000	0.000	0.000	0.000	0.000	0.000	0.000	0.000	0.000	52	340	1132	1647	0.102	Error	Error	586	546	0	0	845	802	0	0	0	0
2	6	11	""	"YGLWtau2"	6950	27550	90	334	679	842	97	103	47	86	76	0	394	752	888	64	69	29	94	94	0	0	0	0	0	0	0	0	0	0	0	0	0	0	0	0	0	0	0	0.718	0.846	0.712	0.741	2.234	0.909	0.790	0.000	0.000	0.000	0.000	0.000	0.000	0.000	0.000	0.000	0.000	0.000	0.000	0.000	0.000	52	420	567	1270	-0.478	Error	Error	237	330	0	0	582	688	0	0	0	0
2	7	11	""	"iYAR061W"	7150	27550	80	4324	4442	2745	107	120	101	100	96	0	3695	4198	2267	68	76	35	100	98	0	0	0	0	0	0	0	0	0	0	0	0	0	0	0	0	0	0	0	1.163	1.050	0.963	0.942	2.020	1.097	0.804	0.000	0.000	0.000	0.000	0.000	0.000	0.000	0.000	0.000	0.000	0.000	0.000	0.000	0.000	52	340	7844	8465	0.217	Error	Error	4217	3627	0	0	4335	4130	0	0	0	0
2	8	11	""	"iYAR068W"	7330	27550	80	2575	4137	3580	107	117	97	100	100	0	2043	2710	2070	67	73	29	100	100	0	0	0	0	0	0	0	0	0	0	0	0	0	0	0	0	0	0	0	1.249	1.525	1.519	1.466	1.958	1.696	0.811	0.000	0.000	0.000	0.000	0.000	0.000	0.000	0.000	0.000	0.000	0.000	0.000	0.000	0.000	52	340	4444	6673	0.321	Error	Error	2468	1976	0	0	4030	2643	0	0	0	0
2	9	11	""	"iYBL111C"	7540	27550	80	8676	15660	15976	99	111	53	100	100	0	4838	7850	7614	65	72	33	100	98	0	0	0	0	0	0	0	0	0	0	0	0	0	0	0	0	0	0	0	1.797	1.999	1.910	1.863	2.752	2.149	0.842	0.000	0.000	0.000	0.000	0.000	0.000	0.000	0.000	0.000	0.000	0.000	0.000	0.000	0.000	52	340	13350	23346	0.846	Error	Error	8577	4773	0	0	15561	7785	0	0	0	0
2	10	11	""	"iYBL098W"	7730	27550	70	1699	2418	1946	106	111	52	100	100	0	1686	1953	1293	68	76	37	100	100	0	0	0	0	0	0	0	0	0	0	0	0	0	0	0	0	0	0	0	0.985	1.227	1.094	1.115	1.810	1.369	0.849	0.000	0.000	0.000	0.000	0.000	0.000	0.000	0.000	0.000	0.000	0.000	0.000	0.000	0.000	32	236	3211	4197	-0.022	Error	Error	1593	1618	0	0	2312	1885	0	0	0	0
2	11	11	""	"iYBL092W"	7940	27550	80	592	1488	2027	112	117	54	98	94	0	585	1392	1664	68	75	32	98	94	0	0	0	0	0	0	0	0	0	0	0	0	0	0	0	0	0	0	0	0.928	1.039	0.953	0.894	2.818	1.192	0.753	0.000	0.000	0.000	0.000	0.000	0.000	0.000	0.000	0.000	0.000	0.000	0.000	0.000	0.000	52	340	997	2700	-0.107	Error	Error	480	517	0	0	1376	1324	0	0	0	0
2	12	11	""	"iYBL089W"	8140	27540	90	1144	2756	4158	103	111	53	100	100	0	1290	2484	3398	66	72	29	98	96	0	0	0	0	0	0	0	0	0	0	0	0	0	0	0	0	0	0	0	0.850	1.097	0.984	1.088	2.813	1.206	0.836	0.000	0.000	0.000	0.000	0.000	0.000	0.000	0.000	0.000	0.000	0.000	0.000	0.000	0.000	52	420	2265	5071	-0.234	Error	Error	1041	1224	0	0	2653	2418	0	0	0	0
2	13	11	""	"iYBL071C"	8340	27550	70	554	1054	1163	104	109	50	90	81	0	463	831	1029	67	75	34	100	96	0	0	0	0	0	0	0	0	0	0	0	0	0	0	0	0	0	0	0	1.136	1.243	1.160	0.954	2.902	1.216	0.610	0.000	0.000	0.000	0.000	0.000	0.000	0.000	0.000	0.000	0.000	0.000	0.000	0.000	0.000	32	236	846	1714	0.184	Error	Error	450	396	0	0	950	764	0	0	0	0
2	14	11	""	"iYBL065W"	8540	27540	70	453	901	990	110	120	53	81	71	0	234	366	301	65	73	34	93	78	0	0	0	0	0	0	0	0	0	0	0	0	0	0	0	0	0	0	0	2.030	2.628	2.234	1.895	2.730	3.362	0.744	0.000	0.000	0.000	0.000	0.000	0.000	0.000	0.000	0.000	0.000	0.000	0.000	0.000	0.000	32	236	512	1092	1.021	Error	Error	343	169	0	0	791	301	0	0	0	0
2	15	11	""	"iYBL060W"	8750	27540	70	2451	2883	1894	106	124	86	100	100	0	1681	1660	893	64	79	62	100	100	0	0	0	0	0	0	0	0	0	0	0	0	0	0	0	0	0	0	0	1.450	1.740	1.772	1.550	1.698	1.928	0.838	0.000	0.000	0.000	0.000	0.000	0.000	0.000	0.000	0.000	0.000	0.000	0.000	0.000	0.000	32	236	3962	4373	0.536	Error	Error	2345	1617	0	0	2777	1596	0	0	0	0
2	16	11	""	"iYBL042C"	8950	27540	70	4642	4717	1930	102	112	72	100	100	0	2428	2178	814	67	75	39	100	100	0	0	0	0	0	0	0	0	0	0	0	0	0	0	0	0	0	0	0	1.923	2.186	2.270	2.205	1.410	2.300	0.856	0.000	0.000	0.000	0.000	0.000	0.000	0.000	0.000	0.000	0.000	0.000	0.000	0.000	0.000	32	236	6901	6726	0.943	Error	Error	4540	2361	0	0	4615	2111	0	0	0	0
2	17	11	""	"iYBL038W"	9150	27550	80	1550	2259	1713	100	108	53	98	98	0	1220	1394	916	63	71	31	98	98	0	0	0	0	0	0	0	0	0	0	0	0	0	0	0	0	0	0	0	1.253	1.622	1.609	1.467	2.137	1.774	0.869	0.000	0.000	0.000	0.000	0.000	0.000	0.000	0.000	0.000	0.000	0.000	0.000	0.000	0.000	52	340	2607	3490	0.326	Error	Error	1450	1157	0	0	2159	1331	0	0	0	0
2	18	11	""	"iYBL034C"	9350	27550	80	957	1242	856	107	113	51	100	96	0	680	761	450	66	73	33	98	98	0	0	0	0	0	0	0	0	0	0	0	0	0	0	0	0	0	0	0	1.384	1.633	1.581	1.592	1.952	1.838	0.792	0.000	0.000	0.000	0.000	0.000	0.000	0.000	0.000	0.000	0.000	0.000	0.000	0.000	0.000	52	340	1464	1830	0.469	Error	Error	850	614	0	0	1135	695	0	0	0	0
2	19	11	""	"iYBR265W"	9550	27550	80	1075	1060	503	105	113	52	100	100	0	1135	1099	475	64	70	35	100	98	0	0	0	0	0	0	0	0	0	0	0	0	0	0	0	0	0	0	0	0.906	0.923	0.891	0.895	1.948	0.970	0.803	0.000	0.000	0.000	0.000	0.000	0.000	0.000	0.000	0.000	0.000	0.000	0.000	0.000	0.000	52	340	2041	1990	-0.143	Error	Error	970	1071	0	0	955	1035	0	0	0	0
2	20	11	""	"iYBR270C"	9750	27550	80	2441	3264	2518	107	118	57	100	100	0	3181	3608	2211	65	74	53	100	100	0	0	0	0	0	0	0	0	0	0	0	0	0	0	0	0	0	0	0	0.749	0.891	0.815	0.757	1.883	0.981	0.862	0.000	0.000	0.000	0.000	0.000	0.000	0.000	0.000	0.000	0.000	0.000	0.000	0.000	0.000	52	340	5450	6700	-0.417	Error	Error	2334	3116	0	0	3157	3543	0	0	0	0
2	21	11	""	"iYBR274W"	9950	27550	80	598	918	713	103	109	48	100	98	0	1424	1826	1257	67	75	29	98	98	0	0	0	0	0	0	0	0	0	0	0	0	0	0	0	0	0	0	0	0.365	0.463	0.406	0.458	2.281	0.462	0.747	0.000	0.000	0.000	0.000	0.000	0.000	0.000	0.000	0.000	0.000	0.000	0.000	0.000	0.000	52	340	1852	2574	-1.455	Error	Error	495	1357	0	0	815	1759	0	0	0	0
2	1	12	""	"iYBR291C"	5950	27760	90	565	703	496	103	112	51	94	90	0	1067	1387	985	66	74	32	100	100	0	0	0	0	0	0	0	0	0	0	0	0	0	0	0	0	0	0	0	0.462	0.454	0.469	0.417	1.967	0.451	0.833	0.000	0.000	0.000	0.000	0.000	0.000	0.000	0.000	0.000	0.000	0.000	0.000	0.000	0.000	52	420	1463	1921	-1.115	Error	Error	462	1001	0	0	600	1321	0	0	0	0
2	2	12	""	"iYBR294W"	6150	27760	80	2722	2991	1826	95	105	51	100	100	0	1776	1710	951	64	72	54	100	98	0	0	0	0	0	0	0	0	0	0	0	0	0	0	0	0	0	0	0	1.534	1.759	1.860	1.796	1.710	1.882	0.866	0.000	0.000	0.000	0.000	0.000	0.000	0.000	0.000	0.000	0.000	0.000	0.000	0.000	0.000	52	340	4339	4542	0.618	Error	Error	2627	1712	0	0	2896	1646	0	0	0	0
2	3	12	""	"iYBR297W"	6340	27750	90	1776	2050	1029	93	101	54	100	100	0	3998	4315	1863	61	66	23	100	100	0	0	0	0	0	0	0	0	0	0	0	0	0	0	0	0	0	0	0	0.427	0.460	0.456	0.441	1.525	0.451	0.878	0.000	0.000	0.000	0.000	0.000	0.000	0.000	0.000	0.000	0.000	0.000	0.000	0.000	0.000	52	420	5620	6211	-1.226	Error	Error	1683	3937	0	0	1957	4254	0	0	0	0
2	4	12	""	"iYCL061C"	6540	27750	80	7307	7152	3840	100	108	51	100	100	0	4600	4032	2025	64	70	28	100	100	0	0	0	0	0	0	0	0	0	0	0	0	0	0	0	0	0	0	0	1.589	1.777	1.771	1.698	1.723	1.853	0.906	0.000	0.000	0.000	0.000	0.000	0.000	0.000	0.000	0.000	0.000	0.000	0.000	0.000	0.000	52	340	11743	11020	0.668	Error	Error	7207	4536	0	0	7052	3968	0	0	0	0
2	5	12	""	"iYCL055W-0"	6750	27750	90	1521	2359	1752	104	111	52	100	100	0	1488	1927	1277	63	71	30	100	100	0	0	0	0	0	0	0	0	0	0	0	0	0	0	0	0	0	0	0	0.994	1.210	1.209	1.149	1.491	1.286	0.889	0.000	0.000	0.000	0.000	0.000	0.000	0.000	0.000	0.000	0.000	0.000	0.000	0.000	0.000	52	420	2842	4119	-0.008	Error	Error	1417	1425	0	0	2255	1864	0	0	0	0
2	6	12	""	"iYCL051W"	6940	27750	80	940	1569	1528	100	107	52	98	96	0	2429	3364	3070	64	71	27	100	98	0	0	0	0	0	0	0	0	0	0	0	0	0	0	0	0	0	0	0	0.355	0.445	0.453	0.439	2.282	0.448	0.848	0.000	0.000	0.000	0.000	0.000	0.000	0.000	0.000	0.000	0.000	0.000	0.000	0.000	0.000	52	340	3205	4769	-1.493	Error	Error	840	2365	0	0	1469	3300	0	0	0	0
2	7	12	""	"iYCL029C"	7140	27750	90	2178	2047	836	102	108	48	100	100	0	1172	1129	389	63	69	28	100	100	0	0	0	0	0	0	0	0	0	0	0	0	0	0	0	0	0	0	0	1.872	1.825	1.839	1.773	1.594	1.955	0.805	0.000	0.000	0.000	0.000	0.000	0.000	0.000	0.000	0.000	0.000	0.000	0.000	0.000	0.000	52	420	3185	3011	0.905	Error	Error	2076	1109	0	0	1945	1066	0	0	0	0
2	8	12	""	"iYCL025C"	7340	27750	90	2624	2970	1705	101	109	51	100	100	0	1118	1266	670	64	72	33	100	100	0	0	0	0	0	0	0	0	0	0	0	0	0	0	0	0	0	0	0	2.394	2.387	2.478	2.427	1.801	2.586	0.863	0.000	0.000	0.000	0.000	0.000	0.000	0.000	0.000	0.000	0.000	0.000	0.000	0.000	0.000	52	420	3577	4071	1.259	Error	Error	2523	1054	0	0	2869	1202	0	0	0	0
2	9	12	""	"iYCRCdelta6-0"	7550	27750	80	1210	1671	1355	101	111	70	100	94	0	1509	1933	1395	63	69	31	100	100	0	0	0	0	0	0	0	0	0	0	0	0	0	0	0	0	0	0	0	0.767	0.840	0.755	0.773	2.160	0.889	0.795	0.000	0.000	0.000	0.000	0.000	0.000	0.000	0.000	0.000	0.000	0.000	0.000	0.000	0.000	52	340	2555	3440	-0.383	Error	Error	1109	1446	0	0	1570	1870	0	0	0	0
2	10	12	""	"iYDL043C"	7750	27760	80	639	642	342	104	109	48	88	88	0	757	675	349	64	68	26	98	98	0	0	0	0	0	0	0	0	0	0	0	0	0	0	0	0	0	0	0	0.772	0.881	0.897	0.908	1.953	0.970	0.773	0.000	0.000	0.000	0.000	0.000	0.000	0.000	0.000	0.000	0.000	0.000	0.000	0.000	0.000	52	340	1228	1149	-0.373	Error	Error	535	693	0	0	538	611	0	0	0	0
2	11	12	""	"iYDL037C-0"	7950	27750	80	1478	1619	1095	109	113	49	98	98	0	2057	2230	1318	64	69	26	100	100	0	0	0	0	0	0	0	0	0	0	0	0	0	0	0	0	0	0	0	0.687	0.697	0.702	0.630	1.965	0.724	0.861	0.000	0.000	0.000	0.000	0.000	0.000	0.000	0.000	0.000	0.000	0.000	0.000	0.000	0.000	52	340	3362	3676	-0.542	Error	Error	1369	1993	0	0	1510	2166	0	0	0	0
2	12	12	""	"iYDL032W"	8160	27760	90	1019	987	615	108	114	56	88	86	0	601	574	312	64	70	27	100	100	0	0	0	0	0	0	0	0	0	0	0	0	0	0	0	0	0	0	0	1.696	1.724	1.538	1.447	2.913	2.167	0.717	0.000	0.000	0.000	0.000	0.000	0.000	0.000	0.000	0.000	0.000	0.000	0.000	0.000	0.000	52	420	1448	1389	0.763	Error	Error	911	537	0	0	879	510	0	0	0	0
2	13	12	""	"iYDL014W"	8350	27750	80	1716	1687	827	109	119	61	100	100	0	1467	1379	553	66	70	28	100	100	0	0	0	0	0	0	0	0	0	0	0	0	0	0	0	0	0	0	0	1.147	1.202	1.155	1.128	1.705	1.296	0.809	0.000	0.000	0.000	0.000	0.000	0.000	0.000	0.000	0.000	0.000	0.000	0.000	0.000	0.000	52	340	3008	2891	0.198	Error	Error	1607	1401	0	0	1578	1313	0	0	0	0
2	14	12	""	"iYDL008W"	8550	27750	80	1231	1231	777	105	114	53	96	90	0	1639	1627	881	66	73	38	100	100	0	0	0	0	0	0	0	0	0	0	0	0	0	0	0	0	0	0	0	0.716	0.721	0.729	0.610	2.153	0.739	0.739	0.000	0.000	0.000	0.000	0.000	0.000	0.000	0.000	0.000	0.000	0.000	0.000	0.000	0.000	52	340	2699	2687	-0.482	Error	Error	1126	1573	0	0	1126	1561	0	0	0	0
2	15	12	""	"iYDLWtau1"	8750	27750	90	767	881	623	106	113	53	96	88	0	813	917	653	65	74	41	100	98	0	0	0	0	0	0	0	0	0	0	0	0	0	0	0	0	0	0	0	0.884	0.910	0.833	0.856	2.136	0.914	0.815	0.000	0.000	0.000	0.000	0.000	0.000	0.000	0.000	0.000	0.000	0.000	0.000	0.000	0.000	52	420	1409	1627	-0.178	Error	Error	661	748	0	0	775	852	0	0	0	0
2	16	12	""	"iYDR008C"	8950	27740	90	2911	2958	1304	103	113	52	100	100	0	1587	1594	618	66	74	31	100	98	0	0	0	0	0	0	0	0	0	0	0	0	0	0	0	0	0	0	0	1.846	1.868	1.759	1.933	2.226	2.094	0.808	0.000	0.000	0.000	0.000	0.000	0.000	0.000	0.000	0.000	0.000	0.000	0.000	0.000	0.000	52	420	4329	4383	0.885	Error	Error	2808	1521	0	0	2855	1528	0	0	0	0
2	17	12	""	"iYDR013W"	9150	27750	90	538	731	665	101	118	83	80	73	0	705	1226	1193	65	74	40	98	98	0	0	0	0	0	0	0	0	0	0	0	0	0	0	0	0	0	0	0	0.683	0.543	0.483	0.475	2.824	0.511	0.764	0.000	0.000	0.000	0.000	0.000	0.000	0.000	0.000	0.000	0.000	0.000	0.000	0.000	0.000	52	420	1077	1791	-0.550	Error	Error	437	640	0	0	630	1161	0	0	0	0
2	18	12	""	"iYDR016C"	9360	27750	90	2191	2224	1237	105	115	55	100	98	0	6692	7021	3233	67	80	111	100	100	0	0	0	0	0	0	0	0	0	0	0	0	0	0	0	0	0	0	0	0.315	0.305	0.305	0.266	1.907	0.290	0.787	0.000	0.000	0.000	0.000	0.000	0.000	0.000	0.000	0.000	0.000	0.000	0.000	0.000	0.000	52	420	8711	9073	-1.667	Error	Error	2086	6625	0	0	2119	6954	0	0	0	0
2	19	12	""	"iYDR032C-0"	9550	27750	90	1825	1774	832	103	114	53	100	100	0	706	706	260	64	73	46	100	98	0	0	0	0	0	0	0	0	0	0	0	0	0	0	0	0	0	0	0	2.682	2.603	2.689	2.454	1.654	2.930	0.819	0.000	0.000	0.000	0.000	0.000	0.000	0.000	0.000	0.000	0.000	0.000	0.000	0.000	0.000	52	420	2364	2313	1.423	Error	Error	1722	642	0	0	1671	642	0	0	0	0
2	20	12	""	"iYDR034C"	9750	27740	90	4462	4303	1008	106	115	60	100	100	0	3663	3520	822	63	69	35	100	100	0	0	0	0	0	0	0	0	0	0	0	0	0	0	0	0	0	0	0	1.210	1.214	1.184	1.229	1.521	1.217	0.852	0.000	0.000	0.000	0.000	0.000	0.000	0.000	0.000	0.000	0.000	0.000	0.000	0.000	0.000	52	420	7956	7654	0.275	Error	Error	4356	3600	0	0	4197	3457	0	0	0	0
2	21	12	""	"iYDR034C-A"	9950	27750	80	6423	6622	3634	104	108	47	100	100	0	9308	7980	4133	62	68	25	100	100	0	0	0	0	0	0	0	0	0	0	0	0	0	0	0	0	0	0	0	0.683	0.823	0.749	0.801	1.950	0.817	0.793	0.000	0.000	0.000	0.000	0.000	0.000	0.000	0.000	0.000	0.000	0.000	0.000	0.000	0.000	52	340	15565	14436	-0.549	Error	Error	6319	9246	0	0	6518	7918	0	0	0	0
2	1	13	""	"iYDR335W"	5950	27950	80	1017	1066	670	102	112	61	94	88	0	1510	1505	764	68	75	31	100	100	0	0	0	0	0	0	0	0	0	0	0	0	0	0	0	0	0	0	0	0.635	0.671	0.637	0.563	2.248	0.709	0.791	0.000	0.000	0.000	0.000	0.000	0.000	0.000	0.000	0.000	0.000	0.000	0.000	0.000	0.000	52	340	2357	2401	-0.656	Error	Error	915	1442	0	0	964	1437	0	0	0	0
2	2	13	""	"iYDR339C"	6140	27950	50	206	220	90	113	116	50	66	50	0	153	163	66	69	74	29	83	75	0	0	0	0	0	0	0	0	0	0	0	0	0	0	0	0	0	0	0	1.107	1.138	1.238	1.119	2.858	0.610	0.290	0.000	0.000	0.000	0.000	0.000	0.000	0.000	0.000	0.000	0.000	0.000	0.000	0.000	0.000	12	104	177	201	0.147	Error	Error	93	84	0	0	107	94	0	0	0	0
2	3	13	""	"iYDR342C-1"	6340	27950	80	3427	3171	1187	90	98	47	100	100	0	1626	1525	412	61	66	24	100	100	0	0	0	0	0	0	0	0	0	0	0	0	0	0	0	0	0	0	0	2.132	2.105	2.106	1.984	1.514	2.396	0.837	0.000	0.000	0.000	0.000	0.000	0.000	0.000	0.000	0.000	0.000	0.000	0.000	0.000	0.000	52	340	4902	4545	1.092	Error	Error	3337	1565	0	0	3081	1464	0	0	0	0
2	4	13	""	"iYDR354W"	6540	27950	80	765	753	411	102	108	56	94	90	0	443	499	321	61	69	31	92	90	0	0	0	0	0	0	0	0	0	0	0	0	0	0	0	0	0	0	0	1.736	1.486	1.439	1.573	2.642	1.449	0.788	0.000	0.000	0.000	0.000	0.000	0.000	0.000	0.000	0.000	0.000	0.000	0.000	0.000	0.000	52	340	1045	1089	0.795	Error	Error	663	382	0	0	651	438	0	0	0	0
2	5	13	""	"iYDR360W"	6740	27940	70	1979	2065	903	103	140	242	96	93	0	1306	1282	666	68	96	182	93	87	0	0	0	0	0	0	0	0	0	0	0	0	0	0	0	0	0	0	0	1.515	1.616	1.406	1.747	2.319	1.666	0.770	0.000	0.000	0.000	0.000	0.000	0.000	0.000	0.000	0.000	0.000	0.000	0.000	0.000	0.000	32	236	3114	3176	0.600	Error	Error	1876	1238	0	0	1962	1214	0	0	0	0
2	6	13	""	"itK(CUU)D1"	6940	27940	70	1324	1226	486	102	113	59	100	100	0	1467	1433	589	67	79	54	100	100	0	0	0	0	0	0	0	0	0	0	0	0	0	0	0	0	0	0	0	0.873	0.823	0.821	0.822	1.709	0.793	0.829	0.000	0.000	0.000	0.000	0.000	0.000	0.000	0.000	0.000	0.000	0.000	0.000	0.000	0.000	32	236	2622	2490	-0.196	Error	Error	1222	1400	0	0	1124	1366	0	0	0	0
2	7	13	""	"iYDR379W"	7140	27950	100	3266	2935	1410	103	109	49	97	95	0	2609	2167	1022	63	70	35	93	92	0	0	0	0	0	0	0	0	0	0	0	0	0	0	0	0	0	0	0	1.242	1.346	1.305	1.393	2.563	1.404	0.834	0.000	0.000	0.000	0.000	0.000	0.000	0.000	0.000	0.000	0.000	0.000	0.000	0.000	0.000	80	540	5709	4936	0.313	Error	Error	3163	2546	0	0	2832	2104	0	0	0	0
2	8	13	""	"iYDR383C"	7350	27950	80	1117	1073	418	104	111	49	100	100	0	1113	1134	409	62	70	32	100	100	0	0	0	0	0	0	0	0	0	0	0	0	0	0	0	0	0	0	0	0.964	0.904	0.893	0.877	1.585	0.953	0.783	0.000	0.000	0.000	0.000	0.000	0.000	0.000	0.000	0.000	0.000	0.000	0.000	0.000	0.000	52	340	2064	2041	-0.053	Error	Error	1013	1051	0	0	969	1072	0	0	0	0
2	9	13	""	"iYDR387C"	7540	27940	70	1320	1350	444	109	116	53	100	100	0	1297	1268	333	64	76	59	100	100	0	0	0	0	0	0	0	0	0	0	0	0	0	0	0	0	0	0	0	0.982	1.031	0.944	1.005	1.568	1.061	0.759	0.000	0.000	0.000	0.000	0.000	0.000	0.000	0.000	0.000	0.000	0.000	0.000	0.000	0.000	32	236	2444	2445	-0.026	Error	Error	1211	1233	0	0	1241	1204	0	0	0	0
2	10	13	""	"iYDR404C"	7740	27940	70	2634	2694	1567	110	145	244	93	90	0	1166	1140	611	67	103	221	93	75	0	0	0	0	0	0	0	0	0	0	0	0	0	0	0	0	0	0	0	2.297	2.408	2.244	2.164	2.427	2.528	0.738	0.000	0.000	0.000	0.000	0.000	0.000	0.000	0.000	0.000	0.000	0.000	0.000	0.000	0.000	32	236	3623	3657	1.200	Error	Error	2524	1099	0	0	2584	1073	0	0	0	0
2	11	13	""	"iYDR408C"	7940	27940	70	3174	2831	1176	106	114	57	100	100	0	1302	1280	441	66	75	32	100	100	0	0	0	0	0	0	0	0	0	0	0	0	0	0	0	0	0	0	0	2.482	2.245	2.301	2.168	1.602	2.337	0.833	0.000	0.000	0.000	0.000	0.000	0.000	0.000	0.000	0.000	0.000	0.000	0.000	0.000	0.000	32	236	4304	3939	1.312	Error	Error	3068	1236	0	0	2725	1214	0	0	0	0
2	12	13	""	"iYDR413C"	8150	27940	70	1345	1448	852	110	119	60	96	93	0	727	813	422	68	77	37	100	100	0	0	0	0	0	0	0	0	0	0	0	0	0	0	0	0	0	0	0	1.874	1.796	1.550	1.532	2.247	1.892	0.704	0.000	0.000	0.000	0.000	0.000	0.000	0.000	0.000	0.000	0.000	0.000	0.000	0.000	0.000	32	236	1894	2083	0.906	Error	Error	1235	659	0	0	1338	745	0	0	0	0
2	13	13	""	"itS(UGA)E-0"	8340	27940	90	3349	4079	2741	110	121	62	100	100	0	2168	2253	1431	68	76	35	100	100	0	0	0	0	0	0	0	0	0	0	0	0	0	0	0	0	0	0	0	1.542	1.816	1.846	1.837	1.727	1.891	0.900	0.000	0.000	0.000	0.000	0.000	0.000	0.000	0.000	0.000	0.000	0.000	0.000	0.000	0.000	52	420	5339	6154	0.625	Error	Error	3239	2100	0	0	3969	2185	0	0	0	0
2	14	13	""	"iYER068W"	8530	27940	80	2525	2959	1835	111	120	55	100	100	0	1033	1174	710	66	74	32	100	98	0	0	0	0	0	0	0	0	0	0	0	0	0	0	0	0	0	0	0	2.496	2.570	2.673	2.753	1.743	2.721	0.861	0.000	0.000	0.000	0.000	0.000	0.000	0.000	0.000	0.000	0.000	0.000	0.000	0.000	0.000	52	340	3381	3956	1.320	Error	Error	2414	967	0	0	2848	1108	0	0	0	0
2	15	13	""	"iYER072W"	8740	27940	80	1472	1657	905	107	117	55	100	100	0	1088	1000	529	66	73	32	98	96	0	0	0	0	0	0	0	0	0	0	0	0	0	0	0	0	0	0	0	1.336	1.660	1.656	1.717	1.872	1.704	0.840	0.000	0.000	0.000	0.000	0.000	0.000	0.000	0.000	0.000	0.000	0.000	0.000	0.000	0.000	52	340	2387	2484	0.418	Error	Error	1365	1022	0	0	1550	934	0	0	0	0
2	16	13	""	"iYER087W"	8940	27940	90	1451	2087	1707	102	114	60	100	100	0	3041	3697	2273	67	76	40	100	100	0	0	0	0	0	0	0	0	0	0	0	0	0	0	0	0	0	0	0	0.454	0.547	0.479	0.475	1.747	0.594	0.831	0.000	0.000	0.000	0.000	0.000	0.000	0.000	0.000	0.000	0.000	0.000	0.000	0.000	0.000	52	420	4323	5615	-1.141	Error	Error	1349	2974	0	0	1985	3630	0	0	0	0
2	17	13	""	"iYER090W"	9140	27940	90	1193	1411	900	107	121	83	100	100	0	2609	2847	1642	66	75	37	100	100	0	0	0	0	0	0	0	0	0	0	0	0	0	0	0	0	0	0	0	0.427	0.469	0.471	0.456	1.516	0.472	0.862	0.000	0.000	0.000	0.000	0.000	0.000	0.000	0.000	0.000	0.000	0.000	0.000	0.000	0.000	52	420	3629	4085	-1.228	Error	Error	1086	2543	0	0	1304	2781	0	0	0	0
2	18	13	""	"iYER093C"	9340	27940	80	852	1371	1158	110	119	58	100	100	0	503	698	524	66	80	121	92	71	0	0	0	0	0	0	0	0	0	0	0	0	0	0	0	0	0	0	0	1.698	1.995	1.821	1.890	1.806	2.216	0.842	0.000	0.000	0.000	0.000	0.000	0.000	0.000	0.000	0.000	0.000	0.000	0.000	0.000	0.000	52	340	1179	1893	0.764	Error	Error	742	437	0	0	1261	632	0	0	0	0
2	19	13	""	"iYER106W"	9540	27940	80	2174	3027	2389	105	112	51	100	100	0	2113	2765	1886	69	74	31	100	100	0	0	0	0	0	0	0	0	0	0	0	0	0	0	0	0	0	0	0	1.012	1.084	1.058	1.010	1.915	1.167	0.833	0.000	0.000	0.000	0.000	0.000	0.000	0.000	0.000	0.000	0.000	0.000	0.000	0.000	0.000	52	340	4113	5618	0.018	Error	Error	2069	2044	0	0	2922	2696	0	0	0	0
2	20	13	""	"iYER110C"	9740	27940	90	1001	1900	2205	105	112	52	100	100	0	782	1547	1660	64	69	28	100	100	0	0	0	0	0	0	0	0	0	0	0	0	0	0	0	0	0	0	0	1.248	1.210	1.168	1.091	1.931	1.311	0.818	0.000	0.000	0.000	0.000	0.000	0.000	0.000	0.000	0.000	0.000	0.000	0.000	0.000	0.000	52	420	1614	3278	0.320	Error	Error	896	718	0	0	1795	1483	0	0	0	0
2	21	13	""	"iYER114C"	9940	27940	80	2193	2698	1576	102	111	50	100	100	0	935	1079	599	64	71	43	100	98	0	0	0	0	0	0	0	0	0	0	0	0	0	0	0	0	0	0	0	2.401	2.558	2.643	2.582	1.608	2.703	0.878	0.000	0.000	0.000	0.000	0.000	0.000	0.000	0.000	0.000	0.000	0.000	0.000	0.000	0.000	52	340	2962	3611	1.263	Error	Error	2091	871	0	0	2596	1015	0	0	0	0
2	1	14	""	"iYER131W"	5940	28150	90	2230	2202	1137	104	113	56	100	100	0	2383	2198	1060	71	77	33	100	100	0	0	0	0	0	0	0	0	0	0	0	0	0	0	0	0	0	0	0	0.920	0.986	0.966	0.983	1.397	0.964	0.876	0.000	0.000	0.000	0.000	0.000	0.000	0.000	0.000	0.000	0.000	0.000	0.000	0.000	0.000	52	420	4438	4225	-0.121	Error	Error	2126	2312	0	0	2098	2127	0	0	0	0
2	2	14	""	"iYERCdelta14"	6140	28150	80	1810	2133	1410	105	113	52	100	100	0	1084	1107	613	68	79	53	100	96	0	0	0	0	0	0	0	0	0	0	0	0	0	0	0	0	0	0	0	1.678	1.952	1.836	1.857	1.885	2.194	0.831	0.000	0.000	0.000	0.000	0.000	0.000	0.000	0.000	0.000	0.000	0.000	0.000	0.000	0.000	52	340	2721	3067	0.747	Error	Error	1705	1016	0	0	2028	1039	0	0	0	0
2	3	14	""	"itK(CUU)E2"	6340	28150	70	1327	2002	1481	101	112	51	100	96	0	1781	2020	1007	66	74	44	100	100	0	0	0	0	0	0	0	0	0	0	0	0	0	0	0	0	0	0	0	0.715	0.973	0.805	0.775	1.862	1.143	0.849	0.000	0.000	0.000	0.000	0.000	0.000	0.000	0.000	0.000	0.000	0.000	0.000	0.000	0.000	32	236	2941	3855	-0.484	Error	Error	1226	1715	0	0	1901	1954	0	0	0	0
2	4	14	""	"iYGL186C"	6540	28150	80	2273	2431	1671	102	112	64	96	96	0	799	939	584	65	75	44	96	92	0	0	0	0	0	0	0	0	0	0	0	0	0	0	0	0	0	0	0	2.958	2.665	2.454	2.593	1.745	2.867	0.874	0.000	0.000	0.000	0.000	0.000	0.000	0.000	0.000	0.000	0.000	0.000	0.000	0.000	0.000	52	334	2905	3203	1.565	Error	Error	2171	734	0	0	2329	874	0	0	0	0
2	5	14	""	"iYGL182C"	6720	28140	100	1879	2375	1390	99	109	56	100	100	0	784	868	586	65	73	38	95	92	0	0	0	0	0	0	0	0	0	0	0	0	0	0	0	0	0	0	0	2.476	2.834	2.920	3.388	1.992	2.807	0.863	0.000	0.000	0.000	0.000	0.000	0.000	0.000	0.000	0.000	0.000	0.000	0.000	0.000	0.000	80	538	2499	3079	1.308	Error	Error	1780	719	0	0	2276	803	0	0	0	0
2	6	14	""	"iYGL179C-1"	6940	28150	70	778	1503	1582	98	108	49	93	87	0	460	680	622	65	70	29	100	100	0	0	0	0	0	0	0	0	0	0	0	0	0	0	0	0	0	0	0	1.722	2.285	2.201	1.818	2.164	2.530	0.890	0.000	0.000	0.000	0.000	0.000	0.000	0.000	0.000	0.000	0.000	0.000	0.000	0.000	0.000	32	236	1075	2020	0.784	Error	Error	680	395	0	0	1405	615	0	0	0	0
2	7	14	""	"iYGL163C-1"	7140	28140	80	3741	4298	2815	105	115	52	100	100	0	1584	1693	1002	66	72	26	98	98	0	0	0	0	0	0	0	0	0	0	0	0	0	0	0	0	0	0	0	2.395	2.577	2.451	2.518	1.604	2.789	0.882	0.000	0.000	0.000	0.000	0.000	0.000	0.000	0.000	0.000	0.000	0.000	0.000	0.000	0.000	52	340	5154	5820	1.260	Error	Error	3636	1518	0	0	4193	1627	0	0	0	0
2	8	14	""	"iYGL159W"	7340	28150	80	839	1957	2299	103	112	49	96	96	0	1013	1840	1904	65	74	29	100	100	0	0	0	0	0	0	0	0	0	0	0	0	0	0	0	0	0	0	0	0.776	1.045	1.016	0.853	2.068	1.156	0.874	0.000	0.000	0.000	0.000	0.000	0.000	0.000	0.000	0.000	0.000	0.000	0.000	0.000	0.000	52	340	1684	3629	-0.365	Error	Error	736	948	0	0	1854	1775	0	0	0	0
2	9	14	""	"iYGL157W"	7540	28140	90	2293	2687	1371	103	111	50	100	100	0	1756	2000	1187	66	74	36	100	98	0	0	0	0	0	0	0	0	0	0	0	0	0	0	0	0	0	0	0	1.296	1.336	1.278	1.571	2.504	1.310	0.845	0.000	0.000	0.000	0.000	0.000	0.000	0.000	0.000	0.000	0.000	0.000	0.000	0.000	0.000	52	420	3880	4518	0.374	Error	Error	2190	1690	0	0	2584	1934	0	0	0	0
2	10	14	""	"iYGL139W"	7740	28150	80	968	1314	972	102	114	57	100	98	0	637	836	558	64	72	38	98	98	0	0	0	0	0	0	0	0	0	0	0	0	0	0	0	0	0	0	0	1.511	1.570	1.557	1.525	1.684	1.723	0.863	0.000	0.000	0.000	0.000	0.000	0.000	0.000	0.000	0.000	0.000	0.000	0.000	0.000	0.000	52	340	1439	1984	0.596	Error	Error	866	573	0	0	1212	772	0	0	0	0
2	11	14	""	"iYGL135W"	7940	28150	80	2190	2493	1880	111	120	60	98	98	0	1156	1316	845	69	75	33	100	100	0	0	0	0	0	0	0	0	0	0	0	0	0	0	0	0	0	0	0	1.913	1.910	1.763	1.625	2.089	2.154	0.834	0.000	0.000	0.000	0.000	0.000	0.000	0.000	0.000	0.000	0.000	0.000	0.000	0.000	0.000	52	340	3166	3629	0.936	Error	Error	2079	1087	0	0	2382	1247	0	0	0	0
2	12	14	""	"iYGL130W"	8140	28140	70	1908	3439	3274	114	125	75	100	100	0	2386	3823	3098	68	79	49	100	100	0	0	0	0	0	0	0	0	0	0	0	0	0	0	0	0	0	0	0	0.774	0.885	0.877	0.763	1.796	0.959	0.895	0.000	0.000	0.000	0.000	0.000	0.000	0.000	0.000	0.000	0.000	0.000	0.000	0.000	0.000	32	236	4112	7080	-0.370	Error	Error	1794	2318	0	0	3325	3755	0	0	0	0
2	13	14	""	"iYGL114W"	8350	28150	80	859	928	560	112	121	58	96	94	0	860	1036	602	72	78	31	100	100	0	0	0	0	0	0	0	0	0	0	0	0	0	0	0	0	0	0	0	0.948	0.846	0.771	0.778	1.997	0.869	0.821	0.000	0.000	0.000	0.000	0.000	0.000	0.000	0.000	0.000	0.000	0.000	0.000	0.000	0.000	52	340	1535	1780	-0.077	Error	Error	747	788	0	0	816	964	0	0	0	0
2	14	14	""	"iYGL110C"	8540	28150	50	485	584	424	111	121	52	83	75	0	421	520	394	74	84	47	83	66	0	0	0	0	0	0	0	0	0	0	0	0	0	0	0	0	0	0	0	1.078	1.061	1.580	1.425	2.309	1.097	0.693	0.000	0.000	0.000	0.000	0.000	0.000	0.000	0.000	0.000	0.000	0.000	0.000	0.000	0.000	12	104	721	919	0.108	Error	Error	374	347	0	0	473	446	0	0	0	0
2	15	14	""	"iYGL105W"	8750	28140	80	535	889	855	109	124	149	82	61	0	647	879	776	66	70	26	98	94	0	0	0	0	0	0	0	0	0	0	0	0	0	0	0	0	0	0	0	0.733	0.959	0.950	0.886	2.438	1.105	0.767	0.000	0.000	0.000	0.000	0.000	0.000	0.000	0.000	0.000	0.000	0.000	0.000	0.000	0.000	52	340	1007	1593	-0.448	Error	Error	426	581	0	0	780	813	0	0	0	0
2	16	14	""	"iYGR177C"	8950	28140	80	724	1375	1361	108	119	55	100	94	0	629	1096	972	64	73	32	98	94	0	0	0	0	0	0	0	0	0	0	0	0	0	0	0	0	0	0	0	1.090	1.228	1.067	1.090	2.404	1.363	0.843	0.000	0.000	0.000	0.000	0.000	0.000	0.000	0.000	0.000	0.000	0.000	0.000	0.000	0.000	52	340	1181	2299	0.125	Error	Error	616	565	0	0	1267	1032	0	0	0	0
2	17	14	""	"itL(CAA)G3"	9130	28140	70	5967	5366	1890	117	131	113	100	100	0	4492	4047	1613	70	90	114	100	100	0	0	0	0	0	0	0	0	0	0	0	0	0	0	0	0	0	0	0	1.323	1.320	1.282	1.410	1.497	1.245	0.893	0.000	0.000	0.000	0.000	0.000	0.000	0.000	0.000	0.000	0.000	0.000	0.000	0.000	0.000	32	236	10272	9226	0.404	Error	Error	5850	4422	0	0	5249	3977	0	0	0	0
2	18	14	""	"iYGR185C"	9350	28140	60	972	1498	1273	100	106	48	100	96	0	679	943	644	64	74	38	100	100	0	0	0	0	0	0	0	0	0	0	0	0	0	0	0	0	0	0	0	1.418	1.590	1.540	1.278	1.803	1.842	0.860	0.000	0.000	0.000	0.000	0.000	0.000	0.000	0.000	0.000	0.000	0.000	0.000	0.000	0.000	32	176	1487	2277	0.504	Error	Error	872	615	0	0	1398	879	0	0	0	0
2	19	14	""	"iYGR199W"	9550	28140	80	479	700	600	107	117	64	90	71	0	833	1489	1402	64	73	36	100	98	0	0	0	0	0	0	0	0	0	0	0	0	0	0	0	0	0	0	0	0.484	0.416	0.384	0.365	3.060	0.399	0.817	0.000	0.000	0.000	0.000	0.000	0.000	0.000	0.000	0.000	0.000	0.000	0.000	0.000	0.000	52	340	1141	2018	-1.048	Error	Error	372	769	0	0	593	1425	0	0	0	0
2	20	14	""	"iYGR203W"	9750	28140	70	824	1002	562	102	115	62	100	96	0	574	608	300	67	74	31	100	100	0	0	0	0	0	0	0	0	0	0	0	0	0	0	0	0	0	0	0	1.424	1.664	1.734	1.557	1.556	1.857	0.811	0.000	0.000	0.000	0.000	0.000	0.000	0.000	0.000	0.000	0.000	0.000	0.000	0.000	0.000	32	236	1229	1441	0.510	Error	Error	722	507	0	0	900	541	0	0	0	0
2	21	14	""	"iYGR207C"	9950	28140	80	695	882	639	110	115	51	100	96	0	798	1073	729	65	74	31	98	98	0	0	0	0	0	0	0	0	0	0	0	0	0	0	0	0	0	0	0	0.798	0.766	0.743	0.727	2.131	0.806	0.867	0.000	0.000	0.000	0.000	0.000	0.000	0.000	0.000	0.000	0.000	0.000	0.000	0.000	0.000	52	340	1318	1780	-0.325	Error	Error	585	733	0	0	772	1008	0	0	0	0
2	1	15	""	"iYGR221C"	5940	28360	80	1205	1463	992	109	116	56	98	98	0	1258	1647	954	71	75	31	98	98	0	0	0	0	0	0	0	0	0	0	0	0	0	0	0	0	0	0	0	0.923	0.859	0.831	0.794	1.656	0.910	0.830	0.000	0.000	0.000	0.000	0.000	0.000	0.000	0.000	0.000	0.000	0.000	0.000	0.000	0.000	52	332	2283	2930	-0.115	Error	Error	1096	1187	0	0	1354	1576	0	0	0	0
2	2	15	""	"iYGR224W"	6140	28350	80	1716	2088	1276	102	113	53	100	100	0	1403	1552	886	68	79	44	100	100	0	0	0	0	0	0	0	0	0	0	0	0	0	0	0	0	0	0	0	1.209	1.338	1.296	1.304	1.618	1.391	0.902	0.000	0.000	0.000	0.000	0.000	0.000	0.000	0.000	0.000	0.000	0.000	0.000	0.000	0.000	52	340	2949	3470	0.274	Error	Error	1614	1335	0	0	1986	1484	0	0	0	0
2	3	15	""	"iYGR230W"	6350	28340	60	937	1772	1582	104	114	62	100	96	0	728	1385	1211	68	90	117	100	93	0	0	0	0	0	0	0	0	0	0	0	0	0	0	0	0	0	0	0	1.262	1.267	1.187	1.164	1.725	1.305	0.871	0.000	0.000	0.000	0.000	0.000	0.000	0.000	0.000	0.000	0.000	0.000	0.000	0.000	0.000	32	176	1493	2985	0.336	Error	Error	833	660	0	0	1668	1317	0	0	0	0
2	4	15	""	"iYGR247W"	6550	28350	90	638	632	284	101	107	51	98	92	0	698	691	203	62	71	39	100	100	0	0	0	0	0	0	0	0	0	0	0	0	0	0	0	0	0	0	0	0.844	0.844	0.878	0.758	1.744	0.931	0.769	0.000	0.000	0.000	0.000	0.000	0.000	0.000	0.000	0.000	0.000	0.000	0.000	0.000	0.000	52	420	1173	1160	-0.244	Error	Error	537	636	0	0	531	629	0	0	0	0
2	5	15	""	"iYGR250C-0"	6750	28350	80	1146	2448	2829	104	114	61	96	92	0	873	1347	1218	64	73	34	100	100	0	0	0	0	0	0	0	0	0	0	0	0	0	0	0	0	0	0	0	1.288	1.827	1.409	1.361	2.093	2.229	0.856	0.000	0.000	0.000	0.000	0.000	0.000	0.000	0.000	0.000	0.000	0.000	0.000	0.000	0.000	52	340	1851	3627	0.365	Error	Error	1042	809	0	0	2344	1283	0	0	0	0
2	6	15	""	"iYGR253C-0"	6950	28350	80	953	1808	1875	101	113	55	100	100	0	649	916	791	65	72	29	96	96	0	0	0	0	0	0	0	0	0	0	0	0	0	0	0	0	0	0	0	1.459	2.006	1.829	1.808	2.114	2.307	0.879	0.000	0.000	0.000	0.000	0.000	0.000	0.000	0.000	0.000	0.000	0.000	0.000	0.000	0.000	52	340	1436	2558	0.545	Error	Error	852	584	0	0	1707	851	0	0	0	0
2	7	15	""	"iYHR186C"	7150	28350	90	3420	3576	1971	105	115	59	100	100	0	4401	4507	1933	67	76	40	100	100	0	0	0	0	0	0	0	0	0	0	0	0	0	0	0	0	0	0	0	0.765	0.782	0.749	0.696	1.608	0.831	0.864	0.000	0.000	0.000	0.000	0.000	0.000	0.000	0.000	0.000	0.000	0.000	0.000	0.000	0.000	52	420	7649	7911	-0.387	Error	Error	3315	4334	0	0	3471	4440	0	0	0	0
2	8	15	""	"iYHR191C"	7340	28350	90	1382	1517	829	106	113	54	98	96	0	1467	1467	714	67	82	150	100	100	0	0	0	0	0	0	0	0	0	0	0	0	0	0	0	0	0	0	0	0.911	1.008	0.912	0.903	1.812	1.062	0.814	0.000	0.000	0.000	0.000	0.000	0.000	0.000	0.000	0.000	0.000	0.000	0.000	0.000	0.000	52	420	2676	2811	-0.134	Error	Error	1276	1400	0	0	1411	1400	0	0	0	0
2	9	15	""	"iYHR196W"	7540	28350	80	567	674	381	105	113	56	98	92	0	663	734	444	68	85	165	90	73	0	0	0	0	0	0	0	0	0	0	0	0	0	0	0	0	0	0	0	0.776	0.854	0.770	0.874	1.858	0.843	0.805	0.000	0.000	0.000	0.000	0.000	0.000	0.000	0.000	0.000	0.000	0.000	0.000	0.000	0.000	52	340	1057	1235	-0.365	Error	Error	462	595	0	0	569	666	0	0	0	0
2	10	15	""	"iYHRCdelta16-0"	7750	28360	90	8281	14061	12900	109	120	94	100	100	0	6299	8509	6201	64	78	89	100	100	0	0	0	0	0	0	0	0	0	0	0	0	0	0	0	0	0	0	0	1.311	1.652	1.302	1.349	1.739	1.935	0.832	0.000	0.000	0.000	0.000	0.000	0.000	0.000	0.000	0.000	0.000	0.000	0.000	0.000	0.000	52	420	14407	22397	0.390	Error	Error	8172	6235	0	0	13952	8445	0	0	0	0
2	11	15	""	"iYIL174W-1"	7940	28340	70	3445	3968	2416	106	123	113	100	100	0	2531	2694	1451	70	84	110	100	100	0	0	0	0	0	0	0	0	0	0	0	0	0	0	0	0	0	0	0	1.357	1.472	1.410	1.419	1.711	1.541	0.920	0.000	0.000	0.000	0.000	0.000	0.000	0.000	0.000	0.000	0.000	0.000	0.000	0.000	0.000	32	236	5800	6486	0.440	Error	Error	3339	2461	0	0	3862	2624	0	0	0	0
2	12	15	""	"iYIL170W-1"	8140	28360	90	2876	3605	2369	107	984	6659	13	0	0	1086	1257	711	70	470	4030	0	0	0	0	0	0	0	0	0	0	0	0	0	0	0	0	0	0	0	0	0	2.725	2.947	2.657	2.641	1.670	3.267	0.864	0.000	0.000	0.000	0.000	0.000	0.000	0.000	0.000	0.000	0.000	0.000	0.000	0.000	0.000	52	420	3785	4685	1.446	Error	Error	2769	1016	0	0	3498	1187	0	0	0	0
2	13	15	""	"iYIL153W"	8350	28350	80	489	654	468	112	119	51	98	90	0	827	1186	894	71	82	37	100	100	0	0	0	0	0	0	0	0	0	0	0	0	0	0	0	0	0	0	0	0.499	0.486	0.489	0.449	1.814	0.474	0.809	0.000	0.000	0.000	0.000	0.000	0.000	0.000	0.000	0.000	0.000	0.000	0.000	0.000	0.000	52	340	1133	1657	-1.004	Error	Error	377	756	0	0	542	1115	0	0	0	0
2	14	15	""	"iYIL149C"	8540	28350	80	2513	3699	3213	113	123	55	100	100	0	1799	2144	1638	72	84	42	98	94	0	0	0	0	0	0	0	0	0	0	0	0	0	0	0	0	0	0	0	1.390	1.731	1.689	1.873	2.565	1.915	0.871	0.000	0.000	0.000	0.000	0.000	0.000	0.000	0.000	0.000	0.000	0.000	0.000	0.000	0.000	52	340	4127	5658	0.475	Error	Error	2400	1727	0	0	3586	2072	0	0	0	0
2	15	15	""	"iYIL145C"	8750	28340	80	4369	4520	3091	103	112	51	100	100	0	2526	2195	1343	67	72	29	100	98	0	0	0	0	0	0	0	0	0	0	0	0	0	0	0	0	0	0	0	1.735	2.076	1.948	2.024	1.738	2.224	0.910	0.000	0.000	0.000	0.000	0.000	0.000	0.000	0.000	0.000	0.000	0.000	0.000	0.000	0.000	52	340	6725	6545	0.795	Error	Error	4266	2459	0	0	4417	2128	0	0	0	0
2	16	15	""	"iYIL129C"	8950	28340	80	2452	3760	3011	100	117	64	100	100	0	787	1182	813	65	76	64	98	98	0	0	0	0	0	0	0	0	0	0	0	0	0	0	0	0	0	0	0	3.258	3.277	3.258	3.014	1.745	3.606	0.907	0.000	0.000	0.000	0.000	0.000	0.000	0.000	0.000	0.000	0.000	0.000	0.000	0.000	0.000	52	340	3074	4777	1.704	Error	Error	2352	722	0	0	3660	1117	0	0	0	0
2	17	15	""	"iYIL125W"	9150	28350	90	877	1177	1025	103	112	54	96	92	0	561	773	556	67	73	30	100	98	0	0	0	0	0	0	0	0	0	0	0	0	0	0	0	0	0	0	0	1.567	1.521	1.406	1.290	1.895	1.740	0.851	0.000	0.000	0.000	0.000	0.000	0.000	0.000	0.000	0.000	0.000	0.000	0.000	0.000	0.000	52	420	1268	1780	0.648	Error	Error	774	494	0	0	1074	706	0	0	0	0
2	18	15	""	"iYIL121W"	9350	28340	80	1248	1754	1325	108	117	63	98	98	0	2255	3044	2061	68	74	29	100	100	0	0	0	0	0	0	0	0	0	0	0	0	0	0	0	0	0	0	0	0.521	0.553	0.542	0.496	2.062	0.551	0.859	0.000	0.000	0.000	0.000	0.000	0.000	0.000	0.000	0.000	0.000	0.000	0.000	0.000	0.000	52	340	3327	4622	-0.940	Error	Error	1140	2187	0	0	1646	2976	0	0	0	0
2	19	15	""	"itR(ACG)J"	9550	28350	90	1296	1538	1173	110	117	51	98	96	0	1799	2204	1441	65	73	35	100	100	0	0	0	0	0	0	0	0	0	0	0	0	0	0	0	0	0	0	0	0.684	0.668	0.651	0.560	1.912	0.714	0.852	0.000	0.000	0.000	0.000	0.000	0.000	0.000	0.000	0.000	0.000	0.000	0.000	0.000	0.000	52	420	2920	3567	-0.548	Error	Error	1186	1734	0	0	1428	2139	0	0	0	0
2	20	15	""	"iYJL098W"	9750	28350	80	515	540	236	108	116	53	98	96	0	412	424	149	63	70	34	100	100	0	0	0	0	0	0	0	0	0	0	0	0	0	0	0	0	0	0	0	1.166	1.197	1.160	1.139	1.848	1.355	0.745	0.000	0.000	0.000	0.000	0.000	0.000	0.000	0.000	0.000	0.000	0.000	0.000	0.000	0.000	52	340	756	793	0.222	Error	Error	407	349	0	0	432	361	0	0	0	0
2	21	15	""	"iYJL093C"	9950	28340	70	3325	3852	2281	102	109	49	100	100	0	2188	2239	1045	67	73	39	100	100	0	0	0	0	0	0	0	0	0	0	0	0	0	0	0	0	0	0	0	1.520	1.727	1.803	1.619	1.513	1.913	0.895	0.000	0.000	0.000	0.000	0.000	0.000	0.000	0.000	0.000	0.000	0.000	0.000	0.000	0.000	32	236	5344	5922	0.604	Error	Error	3223	2121	0	0	3750	2172	0	0	0	0
2	1	16	""	"iYJL074C"	5950	28550	90	2597	2355	1014	101	110	50	100	98	0	2518	2186	879	65	71	27	100	100	0	0	0	0	0	0	0	0	0	0	0	0	0	0	0	0	0	0	0	1.018	1.063	1.081	1.007	1.646	1.086	0.869	0.000	0.000	0.000	0.000	0.000	0.000	0.000	0.000	0.000	0.000	0.000	0.000	0.000	0.000	52	420	4949	4375	0.025	Error	Error	2496	2453	0	0	2254	2121	0	0	0	0
2	2	16	""	"iYJL070C"	6140	28560	90	762	819	352	100	111	57	98	98	0	860	837	299	64	72	33	100	100	0	0	0	0	0	0	0	0	0	0	0	0	0	0	0	0	0	0	0	0.832	0.930	0.913	0.861	1.837	1.012	0.821	0.000	0.000	0.000	0.000	0.000	0.000	0.000	0.000	0.000	0.000	0.000	0.000	0.000	0.000	52	420	1458	1492	-0.266	Error	Error	662	796	0	0	719	773	0	0	0	0
2	3	16	""	"iYJL064W"	6330	28560	80	1023	1086	522	106	117	66	98	98	0	451	507	232	67	76	36	100	100	0	0	0	0	0	0	0	0	0	0	0	0	0	0	0	0	0	0	0	2.388	2.227	2.194	2.156	1.765	2.420	0.792	0.000	0.000	0.000	0.000	0.000	0.000	0.000	0.000	0.000	0.000	0.000	0.000	0.000	0.000	52	340	1301	1420	1.256	Error	Error	917	384	0	0	980	440	0	0	0	0
2	4	16	""	"iSNR60"	6550	28560	90	1636	1477	770	108	113	49	100	98	0	1363	1305	579	65	72	28	100	100	0	0	0	0	0	0	0	0	0	0	0	0	0	0	0	0	0	0	0	1.177	1.104	1.120	0.976	1.807	1.185	0.879	0.000	0.000	0.000	0.000	0.000	0.000	0.000	0.000	0.000	0.000	0.000	0.000	0.000	0.000	52	420	2826	2609	0.235	Error	Error	1528	1298	0	0	1369	1240	0	0	0	0
2	5	16	""	"iYJLCdelta5"	6740	28550	90	1363	1497	829	112	123	66	98	98	0	1274	1584	883	68	78	34	100	100	0	0	0	0	0	0	0	0	0	0	0	0	0	0	0	0	0	0	0	1.037	0.914	0.949	0.857	1.991	0.915	0.772	0.000	0.000	0.000	0.000	0.000	0.000	0.000	0.000	0.000	0.000	0.000	0.000	0.000	0.000	52	420	2457	2901	0.053	Error	Error	1251	1206	0	0	1385	1516	0	0	0	0
2	6	16	""	"iYJL043W"	6940	28560	80	770	1112	952	109	119	64	100	94	0	649	829	620	66	75	35	100	96	0	0	0	0	0	0	0	0	0	0	0	0	0	0	0	0	0	0	0	1.134	1.315	1.308	1.247	1.970	1.473	0.851	0.000	0.000	0.000	0.000	0.000	0.000	0.000	0.000	0.000	0.000	0.000	0.000	0.000	0.000	52	340	1244	1766	0.181	Error	Error	661	583	0	0	1003	763	0	0	0	0
2	7	16	""	"iYJL029C"	7140	28560	90	517	469	192	109	119	65	92	84	0	349	375	161	69	77	37	98	94	0	0	0	0	0	0	0	0	0	0	0	0	0	0	0	0	0	0	0	1.457	1.176	1.105	1.093	2.186	1.302	0.663	0.000	0.000	0.000	0.000	0.000	0.000	0.000	0.000	0.000	0.000	0.000	0.000	0.000	0.000	52	420	688	666	0.543	Error	Error	408	280	0	0	360	306	0	0	0	0
2	8	16	""	"iYJL026W"	7340	28550	90	371	514	371	107	114	54	90	90	0	369	512	311	67	74	34	100	98	0	0	0	0	0	0	0	0	0	0	0	0	0	0	0	0	0	0	0	0.874	0.915	0.857	0.806	2.570	1.044	0.683	0.000	0.000	0.000	0.000	0.000	0.000	0.000	0.000	0.000	0.000	0.000	0.000	0.000	0.000	52	420	566	852	-0.194	Error	Error	264	302	0	0	407	445	0	0	0	0
2	9	16	""	"iYJL022W"	7550	28560	100	2781	2541	1299	107	116	57	97	96	0	2778	2703	1309	68	74	29	97	96	0	0	0	0	0	0	0	0	0	0	0	0	0	0	0	0	0	0	0	0.987	0.924	0.907	0.901	2.130	0.937	0.864	0.000	0.000	0.000	0.000	0.000	0.000	0.000	0.000	0.000	0.000	0.000	0.000	0.000	0.000	80	550	5384	5069	-0.019	Error	Error	2674	2710	0	0	2434	2635	0	0	0	0
2	10	16	""	"iYKL121W"	7750	28560	80	2292	2668	2047	105	113	57	100	100	0	2124	2414	1588	68	74	29	100	100	0	0	0	0	0	0	0	0	0	0	0	0	0	0	0	0	0	0	0	1.064	1.092	1.064	0.933	1.917	1.187	0.870	0.000	0.000	0.000	0.000	0.000	0.000	0.000	0.000	0.000	0.000	0.000	0.000	0.000	0.000	52	340	4243	4909	0.089	Error	Error	2187	2056	0	0	2563	2346	0	0	0	0
2	11	16	""	"iYKL117W"	7950	28550	80	1368	1599	852	99	109	50	100	100	0	4356	5069	2568	68	72	27	100	100	0	0	0	0	0	0	0	0	0	0	0	0	0	0	0	0	0	0	0	0.296	0.300	0.303	0.288	1.684	0.282	0.827	0.000	0.000	0.000	0.000	0.000	0.000	0.000	0.000	0.000	0.000	0.000	0.000	0.000	0.000	52	340	5557	6501	-1.757	Error	Error	1269	4288	0	0	1500	5001	0	0	0	0
2	12	16	""	"iYKL111C"	8150	28550	70	334	680	756	114	118	58	75	62	0	507	1054	1151	69	79	39	100	93	0	0	0	0	0	0	0	0	0	0	0	0	0	0	0	0	0	0	0	0.502	0.575	0.599	0.491	2.496	0.604	0.777	0.000	0.000	0.000	0.000	0.000	0.000	0.000	0.000	0.000	0.000	0.000	0.000	0.000	0.000	32	236	658	1551	-0.993	Error	Error	220	438	0	0	566	985	0	0	0	0
2	13	16	""	"iYKL097W-A-0"	8340	28560	70	1599	1893	1230	110	125	67	96	96	0	870	1012	598	72	85	52	100	96	0	0	0	0	0	0	0	0	0	0	0	0	0	0	0	0	0	0	0	1.866	1.897	1.859	1.762	1.746	2.046	0.831	0.000	0.000	0.000	0.000	0.000	0.000	0.000	0.000	0.000	0.000	0.000	0.000	0.000	0.000	32	236	2287	2723	0.900	Error	Error	1489	798	0	0	1783	940	0	0	0	0
2	14	16	""	"iYKL094W"	8550	28550	80	3756	3863	1891	120	127	60	100	100	0	6316	5905	2573	75	87	45	100	100	0	0	0	0	0	0	0	0	0	0	0	0	0	0	0	0	0	0	0	0.583	0.642	0.633	0.631	1.653	0.646	0.863	0.000	0.000	0.000	0.000	0.000	0.000	0.000	0.000	0.000	0.000	0.000	0.000	0.000	0.000	52	340	9877	9573	-0.779	Error	Error	3636	6241	0	0	3743	5830	0	0	0	0
2	15	16	""	"iYKL090W"	8750	28550	80	876	983	552	106	117	70	100	94	0	549	588	319	67	76	32	100	92	0	0	0	0	0	0	0	0	0	0	0	0	0	0	0	0	0	0	0	1.598	1.683	1.769	1.716	1.793	1.767	0.840	0.000	0.000	0.000	0.000	0.000	0.000	0.000	0.000	0.000	0.000	0.000	0.000	0.000	0.000	52	340	1252	1398	0.676	Error	Error	770	482	0	0	877	521	0	0	0	0
2	16	16	""	"iYKL072W"	8950	28550	70	484	913	882	106	115	55	84	81	0	695	1148	970	64	70	28	100	100	0	0	0	0	0	0	0	0	0	0	0	0	0	0	0	0	0	0	0	0.599	0.744	0.628	0.542	2.529	0.820	0.824	0.000	0.000	0.000	0.000	0.000	0.000	0.000	0.000	0.000	0.000	0.000	0.000	0.000	0.000	32	236	1009	1891	-0.739	Error	Error	378	631	0	0	807	1084	0	0	0	0
2	17	16	""	"iYKL071W"	9150	28550	90	1614	1973	1313	108	117	58	100	98	0	1270	1562	1068	66	76	42	100	100	0	0	0	0	0	0	0	0	0	0	0	0	0	0	0	0	0	0	0	1.251	1.247	1.303	1.276	1.723	1.258	0.886	0.000	0.000	0.000	0.000	0.000	0.000	0.000	0.000	0.000	0.000	0.000	0.000	0.000	0.000	52	420	2710	3361	0.323	Error	Error	1506	1204	0	0	1865	1496	0	0	0	0
2	18	16	""	"itV(AAC)K1-1"	9340	28560	80	2164	2463	1963	110	120	67	98	96	0	682	942	684	70	86	88	92	88	0	0	0	0	0	0	0	0	0	0	0	0	0	0	0	0	0	0	0	3.356	2.698	2.630	2.510	2.208	2.936	0.861	0.000	0.000	0.000	0.000	0.000	0.000	0.000	0.000	0.000	0.000	0.000	0.000	0.000	0.000	52	340	2666	3225	1.747	Error	Error	2054	612	0	0	2353	872	0	0	0	0
2	19	16	""	"iYKL056C"	9550	28550	90	529	751	681	108	117	54	96	82	0	282	459	359	65	75	67	100	78	0	0	0	0	0	0	0	0	0	0	0	0	0	0	0	0	0	0	0	1.940	1.632	1.368	1.328	2.079	1.876	0.807	0.000	0.000	0.000	0.000	0.000	0.000	0.000	0.000	0.000	0.000	0.000	0.000	0.000	0.000	52	420	638	1037	0.956	Error	Error	421	217	0	0	643	394	0	0	0	0
2	20	16	""	"iYKL052C"	9750	28550	80	2748	2957	1500	106	118	59	100	100	0	1490	1527	640	64	69	28	100	100	0	0	0	0	0	0	0	0	0	0	0	0	0	0	0	0	0	0	0	1.853	1.949	1.905	1.866	1.637	2.144	0.827	0.000	0.000	0.000	0.000	0.000	0.000	0.000	0.000	0.000	0.000	0.000	0.000	0.000	0.000	52	340	4068	4314	0.890	Error	Error	2642	1426	0	0	2851	1463	0	0	0	0
2	21	16	""	"iYKL048C"	9950	28550	90	1749	1636	630	105	114	56	100	100	0	1286	1197	404	65	72	34	100	100	0	0	0	0	0	0	0	0	0	0	0	0	0	0	0	0	0	0	0	1.346	1.352	1.368	1.339	1.651	1.424	0.802	0.000	0.000	0.000	0.000	0.000	0.000	0.000	0.000	0.000	0.000	0.000	0.000	0.000	0.000	52	420	2865	2663	0.429	Error	Error	1644	1221	0	0	1531	1132	0	0	0	0
2	1	17	""	"iYLR069C"	5940	28750	90	835	1192	940	101	109	52	100	100	0	1084	1570	1151	67	74	35	100	100	0	0	0	0	0	0	0	0	0	0	0	0	0	0	0	0	0	0	0	0.722	0.726	0.668	0.666	1.752	0.755	0.877	0.000	0.000	0.000	0.000	0.000	0.000	0.000	0.000	0.000	0.000	0.000	0.000	0.000	0.000	52	412	1751	2594	-0.470	Error	Error	734	1017	0	0	1091	1503	0	0	0	0
2	2	17	""	"iYLR073C"	6140	28750	80	1849	1707	646	100	107	53	100	100	0	1032	947	362	66	72	26	100	98	0	0	0	0	0	0	0	0	0	0	0	0	0	0	0	0	0	0	0	1.811	1.824	1.832	1.887	1.685	1.892	0.842	0.000	0.000	0.000	0.000	0.000	0.000	0.000	0.000	0.000	0.000	0.000	0.000	0.000	0.000	52	340	2715	2488	0.856	Error	Error	1749	966	0	0	1607	881	0	0	0	0
2	3	17	""	"iYLR078C"	6340	28750	80	1543	1647	775	109	120	60	100	100	0	1769	1786	888	67	75	31	98	98	0	0	0	0	0	0	0	0	0	0	0	0	0	0	0	0	0	0	0	0.843	0.895	0.896	0.949	1.853	0.882	0.857	0.000	0.000	0.000	0.000	0.000	0.000	0.000	0.000	0.000	0.000	0.000	0.000	0.000	0.000	52	340	3136	3257	-0.247	Error	Error	1434	1702	0	0	1538	1719	0	0	0	0
2	4	17	""	"iYLR094C"	6550	28750	80	4045	3789	1990	111	115	58	100	100	0	1670	1565	722	65	71	26	100	100	0	0	0	0	0	0	0	0	0	0	0	0	0	0	0	0	0	0	0	2.451	2.452	2.429	2.344	1.559	2.623	0.915	0.000	0.000	0.000	0.000	0.000	0.000	0.000	0.000	0.000	0.000	0.000	0.000	0.000	0.000	52	340	5539	5178	1.293	Error	Error	3934	1605	0	0	3678	1500	0	0	0	0
2	5	17	""	"iYLR098C"	6740	28740	70	1804	2002	1162	112	168	285	93	87	0	1117	1303	770	68	113	228	93	81	0	0	0	0	0	0	0	0	0	0	0	0	0	0	0	0	0	0	0	1.613	1.530	1.468	1.593	2.046	1.503	0.804	0.000	0.000	0.000	0.000	0.000	0.000	0.000	0.000	0.000	0.000	0.000	0.000	0.000	0.000	32	236	2741	3125	0.690	Error	Error	1692	1049	0	0	1890	1235	0	0	0	0
2	6	17	""	"iYLR104W"	6940	28750	80	352	545	488	104	117	58	84	78	0	440	715	748	66	73	32	96	94	0	0	0	0	0	0	0	0	0	0	0	0	0	0	0	0	0	0	0	0.663	0.680	0.697	0.664	2.160	0.647	0.861	0.000	0.000	0.000	0.000	0.000	0.000	0.000	0.000	0.000	0.000	0.000	0.000	0.000	0.000	52	340	622	1090	-0.593	Error	Error	248	374	0	0	441	649	0	0	0	0
2	7	17	""	"iYLR117C"	7150	28750	80	3963	4628	3545	110	121	65	100	100	0	2833	3061	2082	69	77	32	100	100	0	0	0	0	0	0	0	0	0	0	0	0	0	0	0	0	0	0	0	1.394	1.510	1.454	1.375	1.804	1.625	0.867	0.000	0.000	0.000	0.000	0.000	0.000	0.000	0.000	0.000	0.000	0.000	0.000	0.000	0.000	52	340	6617	7510	0.479	Error	Error	3853	2764	0	0	4518	2992	0	0	0	0
2	8	17	""	"iYLR121C"	7350	28750	80	1543	1740	1000	111	123	86	100	100	0	859	847	483	68	80	39	98	96	0	0	0	0	0	0	0	0	0	0	0	0	0	0	0	0	0	0	0	1.810	2.091	2.092	2.323	2.093	2.155	0.868	0.000	0.000	0.000	0.000	0.000	0.000	0.000	0.000	0.000	0.000	0.000	0.000	0.000	0.000	52	340	2223	2408	0.856	Error	Error	1432	791	0	0	1629	779	0	0	0	0
2	9	17	""	"iYLR125W"	7540	28750	70	3941	3699	2143	109	124	79	100	100	0	5572	5863	2849	71	84	53	100	100	0	0	0	0	0	0	0	0	0	0	0	0	0	0	0	0	0	0	0	0.697	0.620	0.631	0.573	1.660	0.615	0.859	0.000	0.000	0.000	0.000	0.000	0.000	0.000	0.000	0.000	0.000	0.000	0.000	0.000	0.000	32	236	9333	9382	-0.522	Error	Error	3832	5501	0	0	3590	5792	0	0	0	0
2	10	17	""	"itD(GUC)L1"	7750	28760	80	388	410	221	103	112	53	88	78	0	377	452	259	65	71	29	98	94	0	0	0	0	0	0	0	0	0	0	0	0	0	0	0	0	0	0	0	0.913	0.793	0.764	0.788	2.310	0.823	0.728	0.000	0.000	0.000	0.000	0.000	0.000	0.000	0.000	0.000	0.000	0.000	0.000	0.000	0.000	52	340	597	694	-0.131	Error	Error	285	312	0	0	307	387	0	0	0	0
2	11	17	""	"iYLR147C"	7960	28760	90	1340	1488	1047	104	113	67	100	90	0	1332	1481	928	65	71	36	100	100	0	0	0	0	0	0	0	0	0	0	0	0	0	0	0	0	0	0	0	0.976	0.977	0.951	0.841	1.945	1.044	0.835	0.000	0.000	0.000	0.000	0.000	0.000	0.000	0.000	0.000	0.000	0.000	0.000	0.000	0.000	52	420	2503	2800	-0.036	Error	Error	1236	1267	0	0	1384	1416	0	0	0	0
2	12	17	""	"iYLR151C"	8150	28760	90	786	920	582	103	108	49	100	100	0	1731	1808	988	67	73	30	100	100	0	0	0	0	0	0	0	0	0	0	0	0	0	0	0	0	0	0	0	0.410	0.469	0.446	0.439	1.602	0.482	0.813	0.000	0.000	0.000	0.000	0.000	0.000	0.000	0.000	0.000	0.000	0.000	0.000	0.000	0.000	52	420	2347	2558	-1.285	Error	Error	683	1664	0	0	817	1741	0	0	0	0
2	13	17	""	"iYLR459W"	8350	28750	70	713	1526	1495	118	125	56	93	84	0	1299	2623	2505	74	82	37	100	100	0	0	0	0	0	0	0	0	0	0	0	0	0	0	0	0	0	0	0	0.486	0.552	0.526	0.506	2.192	0.552	0.827	0.000	0.000	0.000	0.000	0.000	0.000	0.000	0.000	0.000	0.000	0.000	0.000	0.000	0.000	32	236	1820	3957	-1.042	Error	Error	595	1225	0	0	1408	2549	0	0	0	0
2	14	17	""	"iYLR461W-1"	8550	28760	80	7043	14701	18717	123	137	66	100	100	0	4457	8263	9619	75	91	78	100	98	0	0	0	0	0	0	0	0	0	0	0	0	0	0	0	0	0	0	0	1.579	1.780	1.372	1.268	2.221	1.998	0.826	0.000	0.000	0.000	0.000	0.000	0.000	0.000	0.000	0.000	0.000	0.000	0.000	0.000	0.000	52	340	11302	22766	0.659	Error	Error	6920	4382	0	0	14578	8188	0	0	0	0
2	15	17	""	"iYML132W-0"	8750	28750	90	5033	6563	5305	106	121	70	100	100	0	2721	4427	4141	69	77	32	100	100	0	0	0	0	0	0	0	0	0	0	0	0	0	0	0	0	0	0	0	1.858	1.482	1.390	1.483	1.965	1.462	0.653	0.000	0.000	0.000	0.000	0.000	0.000	0.000	0.000	0.000	0.000	0.000	0.000	0.000	0.000	52	420	7579	10815	0.894	Error	Error	4927	2652	0	0	6457	4358	0	0	0	0
2	16	17	""	"iYML117W-A"	8960	28750	90	1663	2194	1519	107	116	54	100	100	0	1766	1845	913	67	74	28	100	100	0	0	0	0	0	0	0	0	0	0	0	0	0	0	0	0	0	0	0	0.916	1.174	1.056	1.034	1.683	1.339	0.837	0.000	0.000	0.000	0.000	0.000	0.000	0.000	0.000	0.000	0.000	0.000	0.000	0.000	0.000	52	420	3255	3865	-0.127	Error	Error	1556	1699	0	0	2087	1778	0	0	0	0
2	17	17	""	"iYML113W"	9150	28750	70	1806	3811	4158	110	126	72	100	100	0	1990	3444	2981	68	79	39	100	100	0	0	0	0	0	0	0	0	0	0	0	0	0	0	0	0	0	0	0	0.882	1.096	0.932	0.828	2.181	1.272	0.874	0.000	0.000	0.000	0.000	0.000	0.000	0.000	0.000	0.000	0.000	0.000	0.000	0.000	0.000	32	236	3618	7077	-0.180	Error	Error	1696	1922	0	0	3701	3376	0	0	0	0
2	18	17	""	"iYML109W"	9350	28760	90	329	535	520	106	119	64	80	76	0	353	554	525	69	77	38	98	82	0	0	0	0	0	0	0	0	0	0	0	0	0	0	0	0	0	0	0	0.785	0.885	0.939	0.826	2.505	0.943	0.779	0.000	0.000	0.000	0.000	0.000	0.000	0.000	0.000	0.000	0.000	0.000	0.000	0.000	0.000	52	420	507	914	-0.349	Error	Error	223	284	0	0	429	485	0	0	0	0
2	19	17	""	"iYML089C"	9550	28750	80	1548	2104	1528	107	116	55	100	98	0	794	832	541	67	77	36	94	94	0	0	0	0	0	0	0	0	0	0	0	0	0	0	0	0	0	0	0	1.982	2.610	2.637	2.663	1.840	2.882	0.842	0.000	0.000	0.000	0.000	0.000	0.000	0.000	0.000	0.000	0.000	0.000	0.000	0.000	0.000	52	340	2168	2762	0.987	Error	Error	1441	727	0	0	1997	765	0	0	0	0
2	20	17	""	"iYML085C"	9750	28750	80	452	622	451	106	117	52	94	88	0	307	383	275	65	73	33	98	92	0	0	0	0	0	0	0	0	0	0	0	0	0	0	0	0	0	0	0	1.430	1.623	1.484	1.473	2.249	1.744	0.787	0.000	0.000	0.000	0.000	0.000	0.000	0.000	0.000	0.000	0.000	0.000	0.000	0.000	0.000	52	340	588	834	0.516	Error	Error	346	242	0	0	516	318	0	0	0	0
2	21	17	""	"iYML081W"	9960	28750	80	962	1324	1010	117	125	73	100	94	0	1306	1448	990	67	76	34	100	100	0	0	0	0	0	0	0	0	0	0	0	0	0	0	0	0	0	0	0	0.682	0.874	0.871	0.860	1.886	0.936	0.816	0.000	0.000	0.000	0.000	0.000	0.000	0.000	0.000	0.000	0.000	0.000	0.000	0.000	0.000	52	340	2084	2588	-0.552	Error	Error	845	1239	0	0	1207	1381	0	0	0	0
2	1	18	""	"iYML068W"	5950	28960	80	627	649	376	109	115	53	92	82	0	755	904	553	68	75	30	100	100	0	0	0	0	0	0	0	0	0	0	0	0	0	0	0	0	0	0	0	0.754	0.646	0.640	0.592	1.904	0.645	0.807	0.000	0.000	0.000	0.000	0.000	0.000	0.000	0.000	0.000	0.000	0.000	0.000	0.000	0.000	52	332	1205	1376	-0.407	Error	Error	518	687	0	0	540	836	0	0	0	0
2	2	18	""	"iYML064C"	6150	28970	80	1665	1998	1516	113	117	50	100	98	0	1342	1758	1224	70	78	32	100	100	0	0	0	0	0	0	0	0	0	0	0	0	0	0	0	0	0	0	0	1.220	1.117	0.978	0.990	2.153	1.190	0.853	0.000	0.000	0.000	0.000	0.000	0.000	0.000	0.000	0.000	0.000	0.000	0.000	0.000	0.000	52	340	2824	3573	0.287	Error	Error	1552	1272	0	0	1885	1688	0	0	0	0
2	3	18	""	"iYML060W"	6350	28950	90	876	998	624	110	116	56	100	96	0	1188	1240	593	71	80	38	100	100	0	0	0	0	0	0	0	0	0	0	0	0	0	0	0	0	0	0	0	0.686	0.760	0.713	0.658	1.719	0.840	0.844	0.000	0.000	0.000	0.000	0.000	0.000	0.000	0.000	0.000	0.000	0.000	0.000	0.000	0.000	52	420	1883	2057	-0.544	Error	Error	766	1117	0	0	888	1169	0	0	0	0
2	4	18	""	"iYMR222C"	6550	28960	80	1558	1660	1024	107	114	63	100	96	0	1556	1638	873	64	74	42	100	100	0	0	0	0	0	0	0	0	0	0	0	0	0	0	0	0	0	0	0	0.973	0.987	0.953	0.895	1.972	1.054	0.808	0.000	0.000	0.000	0.000	0.000	0.000	0.000	0.000	0.000	0.000	0.000	0.000	0.000	0.000	52	340	2943	3127	-0.040	Error	Error	1451	1492	0	0	1553	1574	0	0	0	0
2	5	18	""	"iYMR226C"	6750	28960	80	1034	1109	865	105	117	110	82	75	0	929	1085	711	65	79	101	98	86	0	0	0	0	0	0	0	0	0	0	0	0	0	0	0	0	0	0	0	1.075	0.984	0.883	0.785	2.230	1.092	0.803	0.000	0.000	0.000	0.000	0.000	0.000	0.000	0.000	0.000	0.000	0.000	0.000	0.000	0.000	52	340	1793	2024	0.105	Error	Error	929	864	0	0	1004	1020	0	0	0	0
2	6	18	""	"iYMR230W"	6950	28960	80	1190	1576	1369	102	113	56	96	94	0	528	677	464	68	74	28	100	98	0	0	0	0	0	0	0	0	0	0	0	0	0	0	0	0	0	0	0	2.365	2.420	2.125	2.053	1.975	2.809	0.863	0.000	0.000	0.000	0.000	0.000	0.000	0.000	0.000	0.000	0.000	0.000	0.000	0.000	0.000	52	340	1548	2083	1.242	Error	Error	1088	460	0	0	1474	609	0	0	0	0
2	7	18	""	"iYMR245W"	7150	28960	80	3136	3167	1782	114	123	60	100	100	0	1990	1883	980	68	78	41	100	100	0	0	0	0	0	0	0	0	0	0	0	0	0	0	0	0	0	0	0	1.572	1.682	1.637	1.557	1.961	1.775	0.870	0.000	0.000	0.000	0.000	0.000	0.000	0.000	0.000	0.000	0.000	0.000	0.000	0.000	0.000	52	340	4944	4868	0.653	Error	Error	3022	1922	0	0	3053	1815	0	0	0	0
2	8	18	""	"iYMRWdelta19-0"	7350	28960	80	1957	3216	3232	112	120	53	100	100	0	1697	2339	1853	73	80	36	100	100	0	0	0	0	0	0	0	0	0	0	0	0	0	0	0	0	0	0	0	1.136	1.370	1.114	1.172	1.679	1.601	0.859	0.000	0.000	0.000	0.000	0.000	0.000	0.000	0.000	0.000	0.000	0.000	0.000	0.000	0.000	52	340	3469	5370	0.184	Error	Error	1845	1624	0	0	3104	2266	0	0	0	0
2	9	18	""	"iYMR251W-A"	7540	28960	90	733	775	424	105	111	52	92	90	0	1179	1282	728	69	76	66	100	98	0	0	0	0	0	0	0	0	0	0	0	0	0	0	0	0	0	0	0	0.566	0.552	0.565	0.504	2.074	0.533	0.816	0.000	0.000	0.000	0.000	0.000	0.000	0.000	0.000	0.000	0.000	0.000	0.000	0.000	0.000	52	420	1738	1883	-0.822	Error	Error	628	1110	0	0	670	1213	0	0	0	0
2	10	18	""	"iYMR267W"	7750	28950	80	1122	1169	672	110	117	53	96	92	0	2716	2886	1531	66	72	29	100	100	0	0	0	0	0	0	0	0	0	0	0	0	0	0	0	0	0	0	0	0.382	0.376	0.364	0.316	2.141	0.363	0.825	0.000	0.000	0.000	0.000	0.000	0.000	0.000	0.000	0.000	0.000	0.000	0.000	0.000	0.000	52	340	3662	3879	-1.389	Error	Error	1012	2650	0	0	1059	2820	0	0	0	0
2	11	18	""	"iYMR271C"	7950	28950	80	1247	2075	1856	106	113	52	100	98	0	981	1477	1184	67	71	26	100	100	0	0	0	0	0	0	0	0	0	0	0	0	0	0	0	0	0	0	0	1.248	1.396	1.320	1.278	1.992	1.517	0.883	0.000	0.000	0.000	0.000	0.000	0.000	0.000	0.000	0.000	0.000	0.000	0.000	0.000	0.000	52	340	2055	3379	0.320	Error	Error	1141	914	0	0	1969	1410	0	0	0	0
2	12	18	""	"iYMR273C"	8150	28960	90	2359	2911	2058	103	113	52	100	100	0	1343	1416	832	66	72	27	100	100	0	0	0	0	0	0	0	0	0	0	0	0	0	0	0	0	0	0	0	1.767	2.080	1.772	1.822	1.730	2.321	0.852	0.000	0.000	0.000	0.000	0.000	0.000	0.000	0.000	0.000	0.000	0.000	0.000	0.000	0.000	52	420	3533	4158	0.821	Error	Error	2256	1277	0	0	2808	1350	0	0	0	0
2	13	18	""	"iYMR288W"	8350	28950	90	833	839	499	111	119	60	94	88	0	834	897	542	67	78	50	100	98	0	0	0	0	0	0	0	0	0	0	0	0	0	0	0	0	0	0	0	0.941	0.877	0.871	0.814	2.086	0.854	0.811	0.000	0.000	0.000	0.000	0.000	0.000	0.000	0.000	0.000	0.000	0.000	0.000	0.000	0.000	52	420	1489	1558	-0.087	Error	Error	722	767	0	0	728	830	0	0	0	0
2	14	18	""	"iYMR292W"	8550	28950	80	239	427	402	112	126	95	59	36	0	305	603	650	68	81	54	94	86	0	0	0	0	0	0	0	0	0	0	0	0	0	0	0	0	0	0	0	0.536	0.589	0.503	0.488	2.913	0.600	0.657	0.000	0.000	0.000	0.000	0.000	0.000	0.000	0.000	0.000	0.000	0.000	0.000	0.000	0.000	52	340	364	850	-0.900	Error	Error	127	237	0	0	315	535	0	0	0	0
2	15	18	""	"iYMR296C"	8750	28950	90	1368	2139	1705	110	120	56	100	100	0	747	1162	882	67	76	36	100	100	0	0	0	0	0	0	0	0	0	0	0	0	0	0	0	0	0	0	0	1.850	1.853	1.786	1.736	1.622	1.949	0.880	0.000	0.000	0.000	0.000	0.000	0.000	0.000	0.000	0.000	0.000	0.000	0.000	0.000	0.000	52	420	1938	3124	0.888	Error	Error	1258	680	0	0	2029	1095	0	0	0	0
2	16	18	""	"iYNL048W"	8950	28960	100	310	458	531	111	119	61	78	66	0	167	230	181	66	73	32	88	71	0	0	0	0	0	0	0	0	0	0	0	0	0	0	0	0	0	0	0	1.970	2.116	1.649	1.859	2.667	3.113	0.656	0.000	0.000	0.000	0.000	0.000	0.000	0.000	0.000	0.000	0.000	0.000	0.000	0.000	0.000	80	536	300	511	0.978	Error	Error	199	101	0	0	347	164	0	0	0	0
2	17	18	""	"iYNL043C"	9150	28960	100	904	1215	913	111	121	61	97	96	0	920	1305	872	69	77	33	100	100	0	0	0	0	0	0	0	0	0	0	0	0	0	0	0	0	0	0	0	0.932	0.893	0.876	0.846	1.794	0.960	0.831	0.000	0.000	0.000	0.000	0.000	0.000	0.000	0.000	0.000	0.000	0.000	0.000	0.000	0.000	80	546	1644	2340	-0.102	Error	Error	793	851	0	0	1104	1236	0	0	0	0
2	18	18	""	"iYNL040W"	9360	28960	90	149	207	193	111	118	58	36	19	0	255	543	810	69	78	39	98	90	0	0	0	0	0	0	0	0	0	0	0	0	0	0	0	0	0	0	0	0.204	0.203	0.243	0.222	3.102	0.191	0.474	0.000	0.000	0.000	0.000	0.000	0.000	0.000	0.000	0.000	0.000	0.000	0.000	0.000	0.000	52	420	224	570	-2.291	Error	Error	38	186	0	0	96	474	0	0	0	0
2	19	18	""	"iYNL027W"	9550	28950	90	774	1075	936	111	119	54	96	92	0	4686	6130	4914	68	77	34	100	100	0	0	0	0	0	0	0	0	0	0	0	0	0	0	0	0	0	0	0	0.144	0.159	0.141	0.138	1.900	0.153	0.798	0.000	0.000	0.000	0.000	0.000	0.000	0.000	0.000	0.000	0.000	0.000	0.000	0.000	0.000	52	420	5281	7026	-2.800	Error	Error	663	4618	0	0	964	6062	0	0	0	0
2	20	18	""	"iYNL024C"	9750	28960	90	860	963	591	110	120	63	98	92	0	1511	1742	1057	67	75	33	100	100	0	0	0	0	0	0	0	0	0	0	0	0	0	0	0	0	0	0	0	0.519	0.509	0.492	0.486	1.799	0.497	0.834	0.000	0.000	0.000	0.000	0.000	0.000	0.000	0.000	0.000	0.000	0.000	0.000	0.000	0.000	52	420	2194	2528	-0.945	Error	Error	750	1444	0	0	853	1675	0	0	0	0
2	21	18	""	"iYNL020C"	9950	28960	90	246	432	566	110	118	57	82	59	0	559	1220	1730	67	75	37	100	100	0	0	0	0	0	0	0	0	0	0	0	0	0	0	0	0	0	0	0	0.276	0.279	0.286	0.247	2.531	0.286	0.768	0.000	0.000	0.000	0.000	0.000	0.000	0.000	0.000	0.000	0.000	0.000	0.000	0.000	0.000	52	420	628	1475	-1.855	Error	Error	136	492	0	0	322	1153	0	0	0	0
2	1	19	""	"iYNL003C"	5950	29160	100	1572	1958	1656	105	115	54	97	97	0	896	1155	966	67	74	31	97	95	0	0	0	0	0	0	0	0	0	0	0	0	0	0	0	0	0	0	0	1.770	1.703	1.644	1.795	2.499	1.776	0.861	0.000	0.000	0.000	0.000	0.000	0.000	0.000	0.000	0.000	0.000	0.000	0.000	0.000	0.000	80	510	2296	2941	0.823	Error	Error	1467	829	0	0	1853	1088	0	0	0	0
2	2	19	""	"iYNR001C"	6140	29160	100	1677	2632	2134	109	114	52	98	98	0	978	1542	1269	68	77	34	92	91	0	0	0	0	0	0	0	0	0	0	0	0	0	0	0	0	0	0	0	1.723	1.712	1.712	1.890	2.329	1.755	0.878	0.000	0.000	0.000	0.000	0.000	0.000	0.000	0.000	0.000	0.000	0.000	0.000	0.000	0.000	80	514	2478	3997	0.785	Error	Error	1568	910	0	0	2523	1474	0	0	0	0
2	3	19	""	"iYNR002C"	6350	29160	100	518	730	667	106	119	106	91	73	0	333	485	439	69	81	63	93	82	0	0	0	0	0	0	0	0	0	0	0	0	0	0	0	0	0	0	0	1.561	1.500	1.266	1.338	2.100	1.648	0.708	0.000	0.000	0.000	0.000	0.000	0.000	0.000	0.000	0.000	0.000	0.000	0.000	0.000	0.000	80	534	676	1040	0.642	Error	Error	412	264	0	0	624	416	0	0	0	0
2	4	19	""	"iYNR018W"	6550	29160	100	2804	2648	1247	103	118	126	98	97	0	2235	2119	1027	66	77	70	100	97	0	0	0	0	0	0	0	0	0	0	0	0	0	0	0	0	0	0	0	1.245	1.240	1.260	1.266	2.168	1.249	0.895	0.000	0.000	0.000	0.000	0.000	0.000	0.000	0.000	0.000	0.000	0.000	0.000	0.000	0.000	80	520	4870	4598	0.316	Error	Error	2701	2169	0	0	2545	2053	0	0	0	0
2	5	19	""	"iYNR022C"	6750	29160	100	1105	1314	753	110	126	147	97	96	0	671	759	456	68	84	106	93	88	0	0	0	0	0	0	0	0	0	0	0	0	0	0	0	0	0	0	0	1.650	1.742	1.609	1.782	2.153	1.776	0.808	0.000	0.000	0.000	0.000	0.000	0.000	0.000	0.000	0.000	0.000	0.000	0.000	0.000	0.000	80	530	1598	1895	0.723	Error	Error	995	603	0	0	1204	691	0	0	0	0
2	6	19	""	"iYNR027W"	6950	29160	90	354	544	508	103	112	54	88	75	0	200	273	186	67	75	32	86	73	0	0	0	0	0	0	0	0	0	0	0	0	0	0	0	0	0	0	0	1.887	2.141	1.863	1.916	2.654	2.759	0.691	0.000	0.000	0.000	0.000	0.000	0.000	0.000	0.000	0.000	0.000	0.000	0.000	0.000	0.000	52	420	384	647	0.916	Error	Error	251	133	0	0	441	206	0	0	0	0
2	7	19	""	"iYOR064C"	7150	29150	70	2120	2374	1696	111	121	62	100	96	0	762	916	599	70	77	33	100	100	0	0	0	0	0	0	0	0	0	0	0	0	0	0	0	0	0	0	0	2.903	2.675	2.720	2.339	2.008	2.862	0.861	0.000	0.000	0.000	0.000	0.000	0.000	0.000	0.000	0.000	0.000	0.000	0.000	0.000	0.000	32	236	2701	3109	1.538	Error	Error	2009	692	0	0	2263	846	0	0	0	0
2	8	19	""	"iYOR068C"	7350	29150	80	2268	3014	2239	115	119	52	100	100	0	3512	4380	3247	72	81	39	100	100	0	0	0	0	0	0	0	0	0	0	0	0	0	0	0	0	0	0	0	0.626	0.673	0.654	0.704	2.060	0.642	0.857	0.000	0.000	0.000	0.000	0.000	0.000	0.000	0.000	0.000	0.000	0.000	0.000	0.000	0.000	52	340	5593	7207	-0.676	Error	Error	2153	3440	0	0	2899	4308	0	0	0	0
2	9	19	""	"iYOR071C"	7560	29150	80	608	749	549	109	115	53	88	88	0	375	448	283	67	74	30	96	94	0	0	0	0	0	0	0	0	0	0	0	0	0	0	0	0	0	0	0	1.620	1.680	1.748	1.522	1.938	2.219	0.768	0.000	0.000	0.000	0.000	0.000	0.000	0.000	0.000	0.000	0.000	0.000	0.000	0.000	0.000	52	340	807	1021	0.696	Error	Error	499	308	0	0	640	381	0	0	0	0
2	10	19	""	"iYOR086C"	7760	29160	80	3248	3505	1778	109	116	49	100	100	0	1570	1601	751	68	75	33	100	100	0	0	0	0	0	0	0	0	0	0	0	0	0	0	0	0	0	0	0	2.090	2.215	2.137	2.156	1.773	2.422	0.833	0.000	0.000	0.000	0.000	0.000	0.000	0.000	0.000	0.000	0.000	0.000	0.000	0.000	0.000	52	340	4641	4929	1.063	Error	Error	3139	1502	0	0	3396	1533	0	0	0	0
2	11	19	""	"iYOR090C"	7950	29150	80	1751	2483	2030	111	122	61	100	100	0	937	1122	769	67	75	35	98	98	0	0	0	0	0	0	0	0	0	0	0	0	0	0	0	0	0	0	0	1.885	2.248	2.139	2.290	2.332	2.550	0.865	0.000	0.000	0.000	0.000	0.000	0.000	0.000	0.000	0.000	0.000	0.000	0.000	0.000	0.000	52	340	2510	3427	0.915	Error	Error	1640	870	0	0	2372	1055	0	0	0	0
2	12	19	""	"iYOR094W"	8160	29150	80	1217	1288	799	107	115	53	96	96	0	676	767	460	67	76	40	100	100	0	0	0	0	0	0	0	0	0	0	0	0	0	0	0	0	0	0	0	1.823	1.687	1.562	1.470	2.279	1.880	0.766	0.000	0.000	0.000	0.000	0.000	0.000	0.000	0.000	0.000	0.000	0.000	0.000	0.000	0.000	52	340	1719	1881	0.866	Error	Error	1110	609	0	0	1181	700	0	0	0	0
2	13	19	""	"iYOR112W"	8360	29150	80	1980	2336	1473	116	128	86	98	96	0	1665	1975	1085	71	81	47	100	98	0	0	0	0	0	0	0	0	0	0	0	0	0	0	0	0	0	0	0	1.169	1.166	1.144	1.018	2.428	1.258	0.829	0.000	0.000	0.000	0.000	0.000	0.000	0.000	0.000	0.000	0.000	0.000	0.000	0.000	0.000	52	340	3458	4124	0.226	Error	Error	1864	1594	0	0	2220	1904	0	0	0	0
2	14	19	""	"iYOR116C"	8560	29150	80	3080	3617	2508	113	119	54	100	100	0	1621	1987	1821	70	80	35	98	98	0	0	0	0	0	0	0	0	0	0	0	0	0	0	0	0	0	0	0	1.913	1.828	1.845	1.986	2.010	1.803	0.610	0.000	0.000	0.000	0.000	0.000	0.000	0.000	0.000	0.000	0.000	0.000	0.000	0.000	0.000	52	340	4518	5421	0.936	Error	Error	2967	1551	0	0	3504	1917	0	0	0	0
2	15	19	""	"iYOR121C"	8760	29160	80	807	865	471	108	116	55	100	100	0	566	670	388	70	78	33	98	98	0	0	0	0	0	0	0	0	0	0	0	0	0	0	0	0	0	0	0	1.409	1.262	1.191	1.333	1.809	1.270	0.776	0.000	0.000	0.000	0.000	0.000	0.000	0.000	0.000	0.000	0.000	0.000	0.000	0.000	0.000	52	340	1195	1357	0.495	Error	Error	699	496	0	0	757	600	0	0	0	0
2	16	19	""	"iYOR138C"	8970	29150	70	1451	1640	920	104	113	58	100	100	0	738	792	382	67	72	29	100	100	0	0	0	0	0	0	0	0	0	0	0	0	0	0	0	0	0	0	0	2.007	2.119	1.932	2.073	1.410	2.319	0.892	0.000	0.000	0.000	0.000	0.000	0.000	0.000	0.000	0.000	0.000	0.000	0.000	0.000	0.000	32	236	2018	2261	1.005	Error	Error	1347	671	0	0	1536	725	0	0	0	0
2	17	19	""	"itG(CCC)O"	9170	29160	50	351	450	316	119	129	72	75	58	0	476	460	199	70	78	33	100	91	0	0	0	0	0	0	0	0	0	0	0	0	0	0	0	0	0	0	0	0.571	0.849	0.660	0.641	1.980	1.309	0.505	0.000	0.000	0.000	0.000	0.000	0.000	0.000	0.000	0.000	0.000	0.000	0.000	0.000	0.000	12	104	638	721	-0.807	Error	Error	232	406	0	0	331	390	0	0	0	0
2	18	19	""	"iYOR146W"	9360	29150	90	1008	1422	1038	109	116	58	98	94	0	546	660	460	66	76	41	96	86	0	0	0	0	0	0	0	0	0	0	0	0	0	0	0	0	0	0	0	1.873	2.210	2.237	2.458	2.955	2.375	0.816	0.000	0.000	0.000	0.000	0.000	0.000	0.000	0.000	0.000	0.000	0.000	0.000	0.000	0.000	52	420	1379	1907	0.905	Error	Error	899	480	0	0	1313	594	0	0	0	0
2	19	19	""	"iYPL228W"	9570	29150	80	229	345	267	104	112	52	76	59	0	841	957	746	66	74	33	96	94	0	0	0	0	0	0	0	0	0	0	0	0	0	0	0	0	0	0	0	0.161	0.270	0.233	0.202	2.659	0.281	0.698	0.000	0.000	0.000	0.000	0.000	0.000	0.000	0.000	0.000	0.000	0.000	0.000	0.000	0.000	52	340	900	1132	-2.632	Error	Error	125	775	0	0	241	891	0	0	0	0
2	20	19	""	"iYPL224C"	9760	29160	80	2780	2830	1146	104	118	67	100	100	0	2850	2562	780	72	81	36	100	100	0	0	0	0	0	0	0	0	0	0	0	0	0	0	0	0	0	0	0	0.963	1.095	1.139	1.034	1.461	1.172	0.835	0.000	0.000	0.000	0.000	0.000	0.000	0.000	0.000	0.000	0.000	0.000	0.000	0.000	0.000	52	340	5454	5216	-0.054	Error	Error	2676	2778	0	0	2726	2490	0	0	0	0
2	21	19	""	"iYPL220W"	9960	29160	90	1140	1088	548	105	120	73	98	96	0	900	880	344	67	75	34	100	100	0	0	0	0	0	0	0	0	0	0	0	0	0	0	0	0	0	0	0	1.242	1.209	1.263	1.059	1.929	1.334	0.770	0.000	0.000	0.000	0.000	0.000	0.000	0.000	0.000	0.000	0.000	0.000	0.000	0.000	0.000	52	420	1868	1796	0.313	Error	Error	1035	833	0	0	983	813	0	0	0	0
2	1	20	""	"iYPL203W"	5950	29350	90	2474	2374	684	105	112	50	100	100	0	5833	5597	1128	68	75	32	100	100	0	0	0	0	0	0	0	0	0	0	0	0	0	0	0	0	0	0	0	0.411	0.410	0.401	0.398	1.373	0.396	0.867	0.000	0.000	0.000	0.000	0.000	0.000	0.000	0.000	0.000	0.000	0.000	0.000	0.000	0.000	52	414	8134	7798	-1.283	Error	Error	2369	5765	0	0	2269	5529	0	0	0	0
2	2	20	""	"iYPL199C"	6160	29360	90	1435	1440	785	102	109	52	96	94	0	944	912	362	67	75	40	100	100	0	0	0	0	0	0	0	0	0	0	0	0	0	0	0	0	0	0	0	1.520	1.583	1.486	1.355	2.017	1.828	0.788	0.000	0.000	0.000	0.000	0.000	0.000	0.000	0.000	0.000	0.000	0.000	0.000	0.000	0.000	52	420	2210	2183	0.604	Error	Error	1333	877	0	0	1338	845	0	0	0	0
2	3	20	""	"iYPL195W"	6360	29360	80	1715	1515	848	99	117	129	92	86	0	1932	1652	811	67	80	75	100	100	0	0	0	0	0	0	0	0	0	0	0	0	0	0	0	0	0	0	0	0.866	0.893	0.871	0.762	2.095	0.935	0.861	0.000	0.000	0.000	0.000	0.000	0.000	0.000	0.000	0.000	0.000	0.000	0.000	0.000	0.000	52	340	3481	3001	-0.207	Error	Error	1616	1865	0	0	1416	1585	0	0	0	0
2	4	20	""	"itE(UUC)P"	6550	29360	80	415	448	293	97	107	49	88	80	0	663	771	524	65	71	27	100	100	0	0	0	0	0	0	0	0	0	0	0	0	0	0	0	0	0	0	0	0.532	0.497	0.513	0.491	2.089	0.495	0.794	0.000	0.000	0.000	0.000	0.000	0.000	0.000	0.000	0.000	0.000	0.000	0.000	0.000	0.000	52	340	916	1057	-0.911	Error	Error	318	598	0	0	351	706	0	0	0	0
2	5	20	""	"iYPL177C-0"	6750	29350	70	3492	3465	1275	107	155	283	100	100	0	2167	2150	497	70	117	273	100	100	0	0	0	0	0	0	0	0	0	0	0	0	0	0	0	0	0	0	0	1.614	1.614	1.634	1.538	1.388	1.779	0.853	0.000	0.000	0.000	0.000	0.000	0.000	0.000	0.000	0.000	0.000	0.000	0.000	0.000	0.000	32	236	5482	5438	0.691	Error	Error	3385	2097	0	0	3358	2080	0	0	0	0
2	6	20	""	"iYPL174C"	6960	29360	80	1740	1738	754	97	109	51	100	100	0	1785	1671	661	67	75	31	100	100	0	0	0	0	0	0	0	0	0	0	0	0	0	0	0	0	0	0	0	0.956	1.023	0.916	0.979	1.519	1.037	0.801	0.000	0.000	0.000	0.000	0.000	0.000	0.000	0.000	0.000	0.000	0.000	0.000	0.000	0.000	52	340	3361	3245	-0.064	Error	Error	1643	1718	0	0	1641	1604	0	0	0	0
2	7	20	""	"iYPL157W"	7150	29350	90	1400	1250	564	105	113	53	98	96	0	2257	1947	942	72	78	32	100	100	0	0	0	0	0	0	0	0	0	0	0	0	0	0	0	0	0	0	0	0.593	0.611	0.580	0.593	1.864	0.561	0.846	0.000	0.000	0.000	0.000	0.000	0.000	0.000	0.000	0.000	0.000	0.000	0.000	0.000	0.000	52	420	3480	3020	-0.755	Error	Error	1295	2185	0	0	1145	1875	0	0	0	0
2	8	20	""	"iYPL153C"	7350	29360	90	2492	2915	2026	109	120	57	100	100	0	1272	1837	1213	72	79	34	98	98	0	0	0	0	0	0	0	0	0	0	0	0	0	0	0	0	0	0	0	1.986	1.590	1.528	1.593	2.253	1.663	0.878	0.000	0.000	0.000	0.000	0.000	0.000	0.000	0.000	0.000	0.000	0.000	0.000	0.000	0.000	52	420	3583	4571	0.990	Error	Error	2383	1200	0	0	2806	1765	0	0	0	0
2	9	20	""	"iYPL149W"	7560	29360	80	536	696	551	111	119	54	86	75	0	846	903	667	69	75	29	100	100	0	0	0	0	0	0	0	0	0	0	0	0	0	0	0	0	0	0	0	0.547	0.701	0.531	0.542	2.716	0.735	0.757	0.000	0.000	0.000	0.000	0.000	0.000	0.000	0.000	0.000	0.000	0.000	0.000	0.000	0.000	52	340	1202	1419	-0.870	Error	Error	425	777	0	0	585	834	0	0	0	0
2	10	20	""	"itG(GCC)P2"	7760	29360	80	3556	3420	969	113	121	56	100	100	0	2724	2695	777	70	80	42	100	100	0	0	0	0	0	0	0	0	0	0	0	0	0	0	0	0	0	0	0	1.297	1.260	1.253	1.268	1.309	1.287	0.892	0.000	0.000	0.000	0.000	0.000	0.000	0.000	0.000	0.000	0.000	0.000	0.000	0.000	0.000	52	340	6097	5932	0.375	Error	Error	3443	2654	0	0	3307	2625	0	0	0	0
2	11	20	""	"iYPR163C"	7960	29360	90	3881	3721	1169	113	122	58	100	100	0	1541	1416	444	70	79	41	100	100	0	0	0	0	0	0	0	0	0	0	0	0	0	0	0	0	0	0	0	2.562	2.681	2.709	2.680	1.458	2.873	0.857	0.000	0.000	0.000	0.000	0.000	0.000	0.000	0.000	0.000	0.000	0.000	0.000	0.000	0.000	52	420	5239	4954	1.357	Error	Error	3768	1471	0	0	3608	1346	0	0	0	0
2	12	20	""	"iYPR167C"	8170	29360	90	2073	2936	2091	111	118	58	100	100	0	2004	2523	1748	69	76	34	100	100	0	0	0	0	0	0	0	0	0	0	0	0	0	0	0	0	0	0	0	1.014	1.151	1.164	1.079	1.751	1.190	0.782	0.000	0.000	0.000	0.000	0.000	0.000	0.000	0.000	0.000	0.000	0.000	0.000	0.000	0.000	52	420	3897	5279	0.020	Error	Error	1962	1935	0	0	2825	2454	0	0	0	0
2	13	20	""	"iYPR183W"	8360	29350	80	3506	3306	1707	115	124	58	100	100	0	1328	1313	657	68	78	37	98	98	0	0	0	0	0	0	0	0	0	0	0	0	0	0	0	0	0	0	0	2.691	2.563	2.578	2.687	1.972	2.723	0.857	0.000	0.000	0.000	0.000	0.000	0.000	0.000	0.000	0.000	0.000	0.000	0.000	0.000	0.000	52	340	4651	4436	1.428	Error	Error	3391	1260	0	0	3191	1245	0	0	0	0
2	14	20	""	"iYPR187W"	8550	29350	70	727	1280	1187	110	121	62	93	93	0	409	792	675	72	79	33	100	100	0	0	0	0	0	0	0	0	0	0	0	0	0	0	0	0	0	0	0	1.831	1.625	1.511	1.413	2.476	1.778	0.828	0.000	0.000	0.000	0.000	0.000	0.000	0.000	0.000	0.000	0.000	0.000	0.000	0.000	0.000	32	236	954	1890	0.873	Error	Error	617	337	0	0	1170	720	0	0	0	0
2	15	20	""	"iYPR191W"	8760	29350	90	6553	7506	5312	109	115	52	100	100	0	5506	5575	3277	71	79	34	100	100	0	0	0	0	0	0	0	0	0	0	0	0	0	0	0	0	0	0	0	1.186	1.344	1.252	1.298	1.515	1.470	0.869	0.000	0.000	0.000	0.000	0.000	0.000	0.000	0.000	0.000	0.000	0.000	0.000	0.000	0.000	52	420	11879	12901	0.246	Error	Error	6444	5435	0	0	7397	5504	0	0	0	0
2	16	20	""	"YALCdelta2"	8960	29350	80	522	1125	1391	103	115	60	94	90	0	842	1313	1305	70	79	37	100	98	0	0	0	0	0	0	0	0	0	0	0	0	0	0	0	0	0	0	0	0.543	0.822	0.662	0.621	2.212	0.967	0.844	0.000	0.000	0.000	0.000	0.000	0.000	0.000	0.000	0.000	0.000	0.000	0.000	0.000	0.000	52	340	1191	2265	-0.882	Error	Error	419	772	0	0	1022	1243	0	0	0	0
2	17	20	""	"YBLWTy2-1B"	9150	29350	80	21192	24014	19544	108	117	62	100	100	0	14410	15820	11466	71	79	41	100	98	0	0	0	0	0	0	0	0	0	0	0	0	0	0	0	0	0	0	0	1.470	1.518	1.500	1.664	2.752	1.643	0.880	0.000	0.000	0.000	0.000	0.000	0.000	0.000	0.000	0.000	0.000	0.000	0.000	0.000	0.000	52	340	35423	39655	0.556	Error	Error	21084	14339	0	0	23906	15749	0	0	0	0
2	18	20	""	"YBLWdelta10"	9360	29350	80	3588	10239	14366	114	124	65	98	98	0	4053	9397	11855	70	88	173	98	96	0	0	0	0	0	0	0	0	0	0	0	0	0	0	0	0	0	0	0	0.872	1.086	0.946	0.774	2.187	1.185	0.871	0.000	0.000	0.000	0.000	0.000	0.000	0.000	0.000	0.000	0.000	0.000	0.000	0.000	0.000	52	340	7457	19452	-0.197	Error	Error	3474	3983	0	0	10125	9327	0	0	0	0
2	19	20	""	"YFRWdelta10"	9560	29350	80	1152	1356	825	112	125	73	100	98	0	1177	1368	844	71	84	71	100	100	0	0	0	0	0	0	0	0	0	0	0	0	0	0	0	0	0	0	0	0.940	0.959	0.971	0.941	1.770	0.966	0.862	0.000	0.000	0.000	0.000	0.000	0.000	0.000	0.000	0.000	0.000	0.000	0.000	0.000	0.000	52	340	2146	2541	-0.089	Error	Error	1040	1106	0	0	1244	1297	0	0	0	0
2	20	20	""	"YGRCTy1-2A"	9760	29350	90	34445	35426	18666	114	125	62	100	100	15	25072	28016	16816	76	88	48	100	100	0	0	0	0	0	0	0	0	0	0	0	0	0	0	0	0	0	0	0	1.373	1.264	1.273	1.358	1.716	1.257	0.875	0.000	0.000	0.000	0.000	0.000	0.000	0.000	0.000	0.000	0.000	0.000	0.000	0.000	0.000	52	420	59327	63252	0.458	Error	Error	34331	24996	0	0	35312	27940	0	0	0	0
2	21	20	""	"YHLComega1"	9960	29350	80	916	1131	736	105	122	65	100	96	0	1363	1612	974	71	77	30	100	100	0	0	0	0	0	0	0	0	0	0	0	0	0	0	0	0	0	0	0	0.628	0.666	0.657	0.617	1.724	0.663	0.770	0.000	0.000	0.000	0.000	0.000	0.000	0.000	0.000	0.000	0.000	0.000	0.000	0.000	0.000	52	340	2103	2567	-0.672	Error	Error	811	1292	0	0	1026	1541	0	0	0	0
3	1	1	"PET112"	"YBL080C"	10290	25550	100	6208	6998	4193	118	127	72	97	97	0	3467	4161	2721	68	78	43	100	98	0	0	0	0	0	0	0	0	0	0	0	0	0	0	0	0	0	0	0	1.792	1.681	1.685	1.699	2.259	1.681	0.852	0.000	0.000	0.000	0.000	0.000	0.000	0.000	0.000	0.000	0.000	0.000	0.000	0.000	0.000	80	514	9489	10973	0.841	Error	Error	6090	3399	0	0	6880	4093	0	0	0	0
3	2	1	""	"YBL111C"	10490	25540	70	3759	11243	16136	119	135	75	100	100	3	1552	4004	5632	74	86	46	93	93	0	0	0	0	0	0	0	0	0	0	0	0	0	0	0	0	0	0	0	2.463	2.831	2.830	2.702	2.505	3.042	0.850	0.000	0.000	0.000	0.000	0.000	0.000	0.000	0.000	0.000	0.000	0.000	0.000	0.000	0.000	32	230	5118	15054	1.300	Error	Error	3640	1478	0	0	11124	3930	0	0	0	0
3	3	1	""	"YBR028C"	10690	25550	90	1634	3000	3184	118	129	61	98	98	0	778	1255	1265	75	85	44	98	94	0	0	0	0	0	0	0	0	0	0	0	0	0	0	0	0	0	0	0	2.156	2.442	2.214	2.373	2.140	2.666	0.834	0.000	0.000	0.000	0.000	0.000	0.000	0.000	0.000	0.000	0.000	0.000	0.000	0.000	0.000	52	420	2219	4062	1.109	Error	Error	1516	703	0	0	2882	1180	0	0	0	0
3	4	1	"RHK1"	"YBL082C"	10880	25550	60	4157	6011	6205	123	137	70	100	100	0	1630	2470	2564	76	92	52	96	96	0	0	0	0	0	0	0	0	0	0	0	0	0	0	0	0	0	0	0	2.596	2.459	2.358	2.521	1.974	2.621	0.811	0.000	0.000	0.000	0.000	0.000	0.000	0.000	0.000	0.000	0.000	0.000	0.000	0.000	0.000	32	170	5588	8282	1.376	Error	Error	4034	1554	0	0	5888	2394	0	0	0	0
3	5	1	""	"YBL113C"	11090	25540	70	11222	18920	19283	125	136	66	100	100	6	4914	9255	11794	76	88	42	96	96	0	0	0	0	0	0	0	0	0	0	0	0	0	0	0	0	0	0	0	2.294	2.048	2.076	2.587	2.528	1.845	0.881	0.000	0.000	0.000	0.000	0.000	0.000	0.000	0.000	0.000	0.000	0.000	0.000	0.000	0.000	32	230	15935	27974	1.198	Error	Error	11097	4838	0	0	18795	9179	0	0	0	0
3	6	1	""	"YBR030W"	11290	25550	60	760	2212	3419	109	126	73	90	81	0	258	710	1068	72	81	41	87	65	0	0	0	0	0	0	0	0	0	0	0	0	0	0	0	0	0	0	0	3.500	3.296	3.565	3.642	2.736	3.444	0.856	0.000	0.000	0.000	0.000	0.000	0.000	0.000	0.000	0.000	0.000	0.000	0.000	0.000	0.000	32	170	837	2741	1.807	Error	Error	651	186	0	0	2103	638	0	0	0	0
3	7	1	"CDC27"	"YBL084C"	11490	25540	70	2070	4119	5124	127	136	61	96	96	0	1356	2977	3828	75	83	37	100	96	0	0	0	0	0	0	0	0	0	0	0	0	0	0	0	0	0	0	0	1.517	1.376	1.358	1.432	1.872	1.388	0.842	0.000	0.000	0.000	0.000	0.000	0.000	0.000	0.000	0.000	0.000	0.000	0.000	0.000	0.000	32	230	3224	6894	0.601	Error	Error	1943	1281	0	0	3992	2902	0	0	0	0
3	8	1	"RER2"	"YBR002C"	11700	25550	80	2520	17111	23973	126	132	59	96	94	9	4682	11569	15085	74	88	45	94	92	0	0	0	0	0	0	0	0	0	0	0	0	0	0	0	0	0	0	0	0.520	1.478	0.727	0.914	3.645	1.642	0.785	0.000	0.000	0.000	0.000	0.000	0.000	0.000	0.000	0.000	0.000	0.000	0.000	0.000	0.000	52	332	7002	28480	-0.945	Error	Error	2394	4608	0	0	16985	11495	0	0	0	0
3	9	1	""	"YBR032W"	11900	25540	80	3341	2953	1294	109	117	57	96	96	0	1886	1644	694	66	76	41	94	94	0	0	0	0	0	0	0	0	0	0	0	0	0	0	0	0	0	0	0	1.776	1.802	1.750	1.763	2.248	1.912	0.853	0.000	0.000	0.000	0.000	0.000	0.000	0.000	0.000	0.000	0.000	0.000	0.000	0.000	0.000	52	320	5052	4422	0.828	Error	Error	3232	1820	0	0	2844	1578	0	0	0	0
3	10	1	""	"YBL086C"	12090	25540	70	891	2045	2905	113	119	56	96	90	0	302	612	788	75	86	51	90	84	0	0	0	0	0	0	0	0	0	0	0	0	0	0	0	0	0	0	0	3.427	3.598	3.297	3.633	2.480	4.136	0.757	0.000	0.000	0.000	0.000	0.000	0.000	0.000	0.000	0.000	0.000	0.000	0.000	0.000	0.000	32	230	1005	2469	1.777	Error	Error	778	227	0	0	1932	537	0	0	0	0
3	11	1	""	"YBR004C"	12300	25540	70	1052	1556	1361	121	133	60	90	90	0	3102	6017	6333	75	92	65	100	100	0	0	0	0	0	0	0	0	0	0	0	0	0	0	0	0	0	0	0	0.308	0.242	0.250	0.239	1.831	0.211	0.858	0.000	0.000	0.000	0.000	0.000	0.000	0.000	0.000	0.000	0.000	0.000	0.000	0.000	0.000	32	230	3958	7377	-1.701	Error	Error	931	3027	0	0	1435	5942	0	0	0	0
3	12	1	"HMT1"	"YBR034C"	12500	25540	80	4232	5486	3872	124	136	78	98	94	0	6591	6994	4944	74	91	62	98	96	0	0	0	0	0	0	0	0	0	0	0	0	0	0	0	0	0	0	0	0.630	0.775	0.768	0.791	2.608	0.767	0.895	0.000	0.000	0.000	0.000	0.000	0.000	0.000	0.000	0.000	0.000	0.000	0.000	0.000	0.000	52	320	10625	12282	-0.666	Error	Error	4108	6517	0	0	5362	6920	0	0	0	0
3	13	1	""	"YCL044C"	12710	25550	150	126	145	85	120	134	96	14	4	0	96	125	101	83	98	56	25	11	0	0	0	0	0	0	0	0	0	0	0	0	0	0	0	0	0	0	0	0.462	0.595	1.467	1.325	3.461	1.003	0.127	0.000	0.000	0.000	0.000	0.000	0.000	0.000	0.000	0.000	0.000	0.000	0.000	0.000	0.000	156	1049	19	67	-1.115	Error	Error	6	13	0	0	25	42	0	0	-50	0
3	14	1	""	"YCLX03C"	12900	25540	80	4890	4629	2253	128	147	148	98	94	0	4628	4132	2194	86	104	59	96	94	0	0	0	0	0	0	0	0	0	0	0	0	0	0	0	0	0	0	0	1.048	1.112	1.051	1.191	2.711	1.102	0.837	0.000	0.000	0.000	0.000	0.000	0.000	0.000	0.000	0.000	0.000	0.000	0.000	0.000	0.000	52	306	9304	8547	0.068	Error	Error	4762	4542	0	0	4501	4046	0	0	0	0
3	15	1	""	"YCR022C"	13100	25540	90	6257	5701	2823	119	129	57	100	100	0	5763	5248	2168	78	91	47	100	100	0	0	0	0	0	0	0	0	0	0	0	0	0	0	0	0	0	0	0	1.080	1.080	1.125	0.973	2.195	1.118	0.879	0.000	0.000	0.000	0.000	0.000	0.000	0.000	0.000	0.000	0.000	0.000	0.000	0.000	0.000	52	412	11823	10752	0.111	Error	Error	6138	5685	0	0	5582	5170	0	0	0	0
3	16	1	""	"YCL046W"	13310	25540	70	162	185	75	115	125	61	46	28	0	166	175	71	74	82	39	84	62	0	0	0	0	0	0	0	0	0	0	0	0	0	0	0	0	0	0	0	0.511	0.693	0.693	0.719	2.473	1.053	0.163	0.000	0.000	0.000	0.000	0.000	0.000	0.000	0.000	0.000	0.000	0.000	0.000	0.000	0.000	32	230	139	171	-0.969	Error	Error	47	92	0	0	70	101	0	0	0	0
3	17	1	""	"YCLX05C"	13500	25540	80	7343	6441	2288	106	114	49	100	100	0	5024	4259	1952	70	77	34	98	96	0	0	0	0	0	0	0	0	0	0	0	0	0	0	0	0	0	0	0	1.461	1.512	1.460	2.074	2.848	1.458	0.868	0.000	0.000	0.000	0.000	0.000	0.000	0.000	0.000	0.000	0.000	0.000	0.000	0.000	0.000	52	320	12191	10524	0.547	Error	Error	7237	4954	0	0	6335	4189	0	0	0	0
3	18	1	""	"YCR024C"	13700	25550	70	8107	7784	3637	116	128	64	100	100	0	3825	4137	2437	76	90	52	100	100	0	0	0	0	0	0	0	0	0	0	0	0	0	0	0	0	0	0	0	2.132	1.888	1.936	2.155	1.701	1.828	0.855	0.000	0.000	0.000	0.000	0.000	0.000	0.000	0.000	0.000	0.000	0.000	0.000	0.000	0.000	32	236	11740	11729	1.092	Error	Error	7991	3749	0	0	7668	4061	0	0	0	0
3	19	1	""	"YCL048W"	13920	25550	150	125	132	66	113	124	72	18	3	0	85	99	65	72	83	61	15	4	0	0	0	0	0	0	0	0	0	0	0	0	0	0	0	0	0	0	0	0.923	0.704	1.346	1.422	3.886	1.298	0.125	0.000	0.000	0.000	0.000	0.000	0.000	0.000	0.000	0.000	0.000	0.000	0.000	0.000	0.000	156	1094	25	46	-0.115	Error	Error	12	13	0	0	19	27	0	0	-50	0
3	20	1	""	"YCLX07W"	14100	25550	70	5679	5876	2076	101	111	65	100	100	0	4511	4479	1346	69	76	35	100	100	0	0	0	0	0	0	0	0	0	0	0	0	0	0	0	0	0	0	0	1.256	1.310	1.256	1.267	1.599	1.414	0.778	0.000	0.000	0.000	0.000	0.000	0.000	0.000	0.000	0.000	0.000	0.000	0.000	0.000	0.000	32	230	10020	10185	0.329	Error	Error	5578	4442	0	0	5775	4410	0	0	0	0
3	21	1	""	"YCR025C"	14300	25540	90	6203	5264	2123	110	115	53	100	100	0	1324	1132	519	67	75	33	90	90	0	0	0	0	0	0	0	0	0	0	0	0	0	0	0	0	0	0	0	4.847	4.839	4.700	5.269	2.098	5.015	0.850	0.000	0.000	0.000	0.000	0.000	0.000	0.000	0.000	0.000	0.000	0.000	0.000	0.000	0.000	52	412	7350	6219	2.277	Error	Error	6093	1257	0	0	5154	1065	0	0	0	0
3	1	2	"APA1"	"YCL050C"	10300	25750	60	238	269	119	112	118	56	84	59	0	188	233	139	66	73	29	87	78	0	0	0	0	0	0	0	0	0	0	0	0	0	0	0	0	0	0	0	1.033	0.940	0.915	1.053	2.393	0.960	0.449	0.000	0.000	0.000	0.000	0.000	0.000	0.000	0.000	0.000	0.000	0.000	0.000	0.000	0.000	32	160	248	324	0.047	Error	Error	126	122	0	0	157	167	0	0	0	0
3	2	2	""	"YCLX09W"	10500	25750	80	7036	5772	2744	114	122	51	100	100	0	2794	2296	1187	72	78	33	92	92	0	0	0	0	0	0	0	0	0	0	0	0	0	0	0	0	0	0	0	2.543	2.544	2.512	2.733	2.331	2.560	0.876	0.000	0.000	0.000	0.000	0.000	0.000	0.000	0.000	0.000	0.000	0.000	0.000	0.000	0.000	52	340	9644	7882	1.347	Error	Error	6922	2722	0	0	5658	2224	0	0	0	0
3	3	2	"RSG1"	"YCR027C"	10710	25750	80	6252	5533	1844	115	126	69	100	100	0	3035	2837	780	72	83	40	100	100	0	0	0	0	0	0	0	0	0	0	0	0	0	0	0	0	0	0	0	2.071	1.959	2.047	1.921	1.861	2.123	0.827	0.000	0.000	0.000	0.000	0.000	0.000	0.000	0.000	0.000	0.000	0.000	0.000	0.000	0.000	52	340	9100	8183	1.050	Error	Error	6137	2963	0	0	5418	2765	0	0	0	0
3	4	2	""	"YDL211C"	10900	25760	70	350	864	1374	129	146	114	62	50	0	189	511	837	77	90	51	71	59	0	0	0	0	0	0	0	0	0	0	0	0	0	0	0	0	0	0	0	1.973	1.694	1.460	1.463	3.639	1.805	0.725	0.000	0.000	0.000	0.000	0.000	0.000	0.000	0.000	0.000	0.000	0.000	0.000	0.000	0.000	32	236	333	1169	0.981	Error	Error	221	112	0	0	735	434	0	0	0	0
3	5	2	"AAD4"	"YDL243C"	11110	25750	150	132	161	117	123	140	106	14	7	0	82	106	93	76	87	46	18	8	0	0	0	0	0	0	0	0	0	0	0	0	0	0	0	0	0	0	0	1.500	1.267	1.501	1.690	4.364	3.984	0.116	0.000	0.000	0.000	0.000	0.000	0.000	0.000	0.000	0.000	0.000	0.000	0.000	0.000	0.000	156	1044	15	68	0.585	Error	Error	9	6	0	0	38	30	0	0	-50	0
3	6	2	"LUV1"	"YDR027C"	11310	25750	70	3205	3907	3382	128	143	77	100	93	0	1566	3310	3280	75	93	71	96	93	0	0	0	0	0	0	0	0	0	0	0	0	0	0	0	0	0	0	0	2.064	1.168	1.154	1.263	2.370	1.097	0.798	0.000	0.000	0.000	0.000	0.000	0.000	0.000	0.000	0.000	0.000	0.000	0.000	0.000	0.000	32	236	4568	7014	1.045	Error	Error	3077	1491	0	0	3779	3235	0	0	0	0
3	7	2	""	"YDL213C"	11510	25750	50	3118	4026	2827	105	122	58	100	100	0	1846	1790	1180	73	88	48	100	100	0	0	0	0	0	0	0	0	0	0	0	0	0	0	0	0	0	0	0	1.699	2.284	2.399	2.398	1.949	2.570	0.766	0.000	0.000	0.000	0.000	0.000	0.000	0.000	0.000	0.000	0.000	0.000	0.000	0.000	0.000	12	104	4786	5638	0.765	Error	Error	3013	1773	0	0	3921	1717	0	0	0	0
3	8	2	"HXT15"	"YDL245C"	11710	25750	70	21175	23593	19299	114	123	55	100	100	0	11909	13717	10825	72	83	45	100	100	0	0	0	0	0	0	0	0	0	0	0	0	0	0	0	0	0	0	0	1.779	1.721	1.780	1.803	3.094	1.795	0.909	0.000	0.000	0.000	0.000	0.000	0.000	0.000	0.000	0.000	0.000	0.000	0.000	0.000	0.000	32	236	32898	37124	0.831	Error	Error	21061	11837	0	0	23479	13645	0	0	0	0
3	9	2	""	"YDR029W"	11920	25750	70	404	1226	1523	110	121	59	84	62	0	181	530	615	67	75	39	75	56	0	0	0	0	0	0	0	0	0	0	0	0	0	0	0	0	0	0	0	2.579	2.410	2.953	2.686	2.813	2.873	0.655	0.000	0.000	0.000	0.000	0.000	0.000	0.000	0.000	0.000	0.000	0.000	0.000	0.000	0.000	32	236	408	1579	1.367	Error	Error	294	114	0	0	1116	463	0	0	0	0
3	10	2	"GDH2"	"YDL215C"	12110	25750	60	950	2333	3672	115	129	63	100	96	0	437	1063	1395	69	85	58	100	100	0	0	0	0	0	0	0	0	0	0	0	0	0	0	0	0	0	0	0	2.269	2.231	1.899	1.871	2.148	2.796	0.769	0.000	0.000	0.000	0.000	0.000	0.000	0.000	0.000	0.000	0.000	0.000	0.000	0.000	0.000	32	176	1203	3212	1.182	Error	Error	835	368	0	0	2218	994	0	0	0	0
3	11	2	""	"YDL247W"	12320	25750	70	1418	3075	4579	125	133	76	100	93	0	830	1611	2101	74	86	43	100	100	0	0	0	0	0	0	0	0	0	0	0	0	0	0	0	0	0	0	0	1.710	1.919	1.636	1.719	2.372	2.497	0.606	0.000	0.000	0.000	0.000	0.000	0.000	0.000	0.000	0.000	0.000	0.000	0.000	0.000	0.000	32	236	2049	4487	0.774	Error	Error	1293	756	0	0	2950	1537	0	0	0	0
3	12	2	""	"YDR031W"	12520	25750	60	4040	4216	2446	131	139	58	100	100	0	1373	1301	637	83	95	52	100	100	0	0	0	0	0	0	0	0	0	0	0	0	0	0	0	0	0	0	0	3.030	3.354	3.414	3.162	1.729	3.693	0.880	0.000	0.000	0.000	0.000	0.000	0.000	0.000	0.000	0.000	0.000	0.000	0.000	0.000	0.000	32	176	5199	5303	1.599	Error	Error	3909	1290	0	0	4085	1218	0	0	0	0
3	13	2	"TIM22"	"YDL217C"	12720	25750	70	934	2456	3288	125	135	64	96	96	0	749	1676	2000	84	100	59	100	96	0	0	0	0	0	0	0	0	0	0	0	0	0	0	0	0	0	0	0	1.217	1.464	1.403	1.260	2.111	1.695	0.753	0.000	0.000	0.000	0.000	0.000	0.000	0.000	0.000	0.000	0.000	0.000	0.000	0.000	0.000	32	236	1474	3923	0.283	Error	Error	809	665	0	0	2331	1592	0	0	0	0
3	14	2	"NTH1"	"YDR001C"	12910	25750	60	337	412	257	121	133	61	87	75	0	881	1085	816	83	102	76	96	90	0	0	0	0	0	0	0	0	0	0	0	0	0	0	0	0	0	0	0	0.271	0.290	0.306	0.319	2.675	0.245	0.579	0.000	0.000	0.000	0.000	0.000	0.000	0.000	0.000	0.000	0.000	0.000	0.000	0.000	0.000	32	176	1014	1293	-1.885	Error	Error	216	798	0	0	291	1002	0	0	0	0
3	15	2	"MRH1"	"YDR033W"	13110	25750	70	661	1544	1732	125	133	63	96	90	0	420	845	963	78	90	45	96	90	0	0	0	0	0	0	0	0	0	0	0	0	0	0	0	0	0	0	0	1.567	1.850	1.786	1.686	2.770	1.970	0.756	0.000	0.000	0.000	0.000	0.000	0.000	0.000	0.000	0.000	0.000	0.000	0.000	0.000	0.000	32	236	878	2186	0.648	Error	Error	536	342	0	0	1419	767	0	0	0	0
3	16	2	""	"YDR346C"	13320	25750	70	1879	2168	2055	132	143	65	90	90	0	1175	1585	1308	79	94	64	100	96	0	0	0	0	0	0	0	0	0	0	0	0	0	0	0	0	0	0	0	1.594	1.352	1.091	1.062	2.607	1.616	0.624	0.000	0.000	0.000	0.000	0.000	0.000	0.000	0.000	0.000	0.000	0.000	0.000	0.000	0.000	32	236	2843	3542	0.673	Error	Error	1747	1096	0	0	2036	1506	0	0	0	0
3	17	2	"LSM6"	"YDR378C"	13520	25750	80	2673	2416	829	112	122	57	100	100	0	828	831	211	79	122	550	84	5	0	0	0	0	0	0	0	0	0	0	0	0	0	0	0	0	0	0	0	3.419	3.064	2.879	2.909	1.580	3.608	0.778	0.000	0.000	0.000	0.000	0.000	0.000	0.000	0.000	0.000	0.000	0.000	0.000	0.000	0.000	52	340	3310	3056	1.774	Error	Error	2561	749	0	0	2304	752	0	0	0	0
3	18	2	"STE14"	"YDR410C"	13710	25750	80	6686	6286	1539	119	127	58	100	100	0	6253	5815	1519	84	95	43	100	100	0	0	0	0	0	0	0	0	0	0	0	0	0	0	0	0	0	0	0	1.065	1.076	1.042	1.097	1.567	1.062	0.864	0.000	0.000	0.000	0.000	0.000	0.000	0.000	0.000	0.000	0.000	0.000	0.000	0.000	0.000	52	340	12736	11898	0.090	Error	Error	6567	6169	0	0	6167	5731	0	0	0	0
3	19	2	""	"YDR348C"	13910	25750	60	237	264	117	114	125	62	81	50	0	309	330	132	80	89	41	93	93	0	0	0	0	0	0	0	0	0	0	0	0	0	0	0	0	0	0	0	0.537	0.600	0.580	0.540	1.963	0.607	0.293	0.000	0.000	0.000	0.000	0.000	0.000	0.000	0.000	0.000	0.000	0.000	0.000	0.000	0.000	32	176	352	400	-0.897	Error	Error	123	229	0	0	150	250	0	0	0	0
3	20	2	""	"YDR380W"	14110	25750	80	8930	8584	3874	118	124	54	100	100	0	4138	3622	1749	73	83	39	96	96	0	0	0	0	0	0	0	0	0	0	0	0	0	0	0	0	0	0	0	2.168	2.385	2.316	2.545	2.148	2.454	0.882	0.000	0.000	0.000	0.000	0.000	0.000	0.000	0.000	0.000	0.000	0.000	0.000	0.000	0.000	52	340	12877	12015	1.116	Error	Error	8812	4065	0	0	8466	3549	0	0	0	0
3	21	2	""	"YDR412W"	14320	25750	80	8656	7002	3813	115	122	53	98	98	0	4710	4002	1768	70	77	37	100	100	0	0	0	0	0	0	0	0	0	0	0	0	0	0	0	0	0	0	0	1.841	1.752	1.831	1.401	2.353	1.917	0.868	0.000	0.000	0.000	0.000	0.000	0.000	0.000	0.000	0.000	0.000	0.000	0.000	0.000	0.000	52	340	13181	10819	0.880	Error	Error	8541	4640	0	0	6887	3932	0	0	0	0
3	1	3	"TCM10"	"YDR350C"	10310	25960	80	5583	4835	1748	106	120	75	100	100	0	2028	1835	591	67	78	60	98	98	0	0	0	0	0	0	0	0	0	0	0	0	0	0	0	0	0	0	0	2.793	2.675	2.740	2.482	1.645	2.837	0.853	0.000	0.000	0.000	0.000	0.000	0.000	0.000	0.000	0.000	0.000	0.000	0.000	0.000	0.000	52	332	7438	6497	1.482	Error	Error	5477	1961	0	0	4729	1768	0	0	0	0
3	2	3	"RPP2B"	"YDR382W"	10510	25950	80	1839	1769	488	116	121	53	100	100	0	974	880	356	72	78	34	96	92	0	0	0	0	0	0	0	0	0	0	0	0	0	0	0	0	0	0	0	1.910	2.046	1.928	2.196	1.958	2.023	0.837	0.000	0.000	0.000	0.000	0.000	0.000	0.000	0.000	0.000	0.000	0.000	0.000	0.000	0.000	52	340	2625	2461	0.934	Error	Error	1723	902	0	0	1653	808	0	0	0	0
3	3	3	"ERD1"	"YDR414C"	10710	25950	80	8874	7920	2857	117	126	56	100	100	0	3924	3311	1489	74	80	34	98	98	0	0	0	0	0	0	0	0	0	0	0	0	0	0	0	0	0	0	0	2.275	2.411	2.361	2.831	2.201	2.423	0.880	0.000	0.000	0.000	0.000	0.000	0.000	0.000	0.000	0.000	0.000	0.000	0.000	0.000	0.000	52	340	12607	11040	1.186	Error	Error	8757	3850	0	0	7803	3237	0	0	0	0
3	4	3	""	"YDR352W"	10910	25950	70	5052	5709	2714	119	132	63	100	100	0	5734	6105	3992	77	88	40	100	100	0	0	0	0	0	0	0	0	0	0	0	0	0	0	0	0	0	0	0	0.872	0.927	0.941	1.142	2.446	0.798	0.822	0.000	0.000	0.000	0.000	0.000	0.000	0.000	0.000	0.000	0.000	0.000	0.000	0.000	0.000	32	236	10590	11618	-0.198	Error	Error	4933	5657	0	0	5590	6028	0	0	0	0
3	5	3	""	"YDR384C"	11110	25960	80	9270	8288	2839	128	149	150	100	100	0	6147	5169	2001	79	92	52	100	100	0	0	0	0	0	0	0	0	0	0	0	0	0	0	0	0	0	0	0	1.507	1.603	1.530	1.614	1.629	1.559	0.886	0.000	0.000	0.000	0.000	0.000	0.000	0.000	0.000	0.000	0.000	0.000	0.000	0.000	0.000	52	340	15210	13250	0.591	Error	Error	9142	6068	0	0	8160	5090	0	0	0	0
3	6	3	"SYF1"	"YDR416W"	11310	25960	70	11450	11238	5651	116	129	67	100	100	0	4708	4163	1914	76	85	36	100	100	0	0	0	0	0	0	0	0	0	0	0	0	0	0	0	0	0	0	0	2.447	2.721	2.783	2.585	1.802	2.868	0.880	0.000	0.000	0.000	0.000	0.000	0.000	0.000	0.000	0.000	0.000	0.000	0.000	0.000	0.000	32	236	15966	15209	1.291	Error	Error	11334	4632	0	0	11122	4087	0	0	0	0
3	7	3	"SHC1"	"YER096W"	11500	25950	70	8672	8314	2287	122	141	148	100	100	0	5317	4555	1875	81	108	212	96	96	0	0	0	0	0	0	0	0	0	0	0	0	0	0	0	0	0	0	0	1.633	1.831	1.654	1.994	1.938	1.696	0.824	0.000	0.000	0.000	0.000	0.000	0.000	0.000	0.000	0.000	0.000	0.000	0.000	0.000	0.000	32	236	13786	12666	0.707	Error	Error	8550	5236	0	0	8192	4474	0	0	0	0
3	8	3	"LCP5"	"YER127W"	11710	25950	80	8731	7384	3009	120	135	167	98	98	0	4189	3794	1292	73	92	96	98	96	0	0	0	0	0	0	0	0	0	0	0	0	0	0	0	0	0	0	0	2.092	1.952	1.992	1.865	2.028	2.110	0.858	0.000	0.000	0.000	0.000	0.000	0.000	0.000	0.000	0.000	0.000	0.000	0.000	0.000	0.000	52	340	12727	10985	1.065	Error	Error	8611	4116	0	0	7264	3721	0	0	0	0
3	9	3	"BUR6"	"YER159C"	11900	25950	80	4201	4024	1161	111	119	54	100	100	0	1670	1457	640	66	75	36	92	92	0	0	0	0	0	0	0	0	0	0	0	0	0	0	0	0	0	0	0	2.550	2.813	2.654	3.696	2.563	2.750	0.848	0.000	0.000	0.000	0.000	0.000	0.000	0.000	0.000	0.000	0.000	0.000	0.000	0.000	0.000	52	340	5694	5304	1.350	Error	Error	4090	1604	0	0	3913	1391	0	0	0	0
3	10	3	"UBP9"	"YER098W"	12110	25950	70	13108	13040	5245	105	121	61	100	100	0	7712	7410	3407	70	80	36	100	100	0	0	0	0	0	0	0	0	0	0	0	0	0	0	0	0	0	0	0	1.702	1.762	1.855	1.926	2.024	1.719	0.849	0.000	0.000	0.000	0.000	0.000	0.000	0.000	0.000	0.000	0.000	0.000	0.000	0.000	0.000	32	236	20645	20275	0.767	Error	Error	13003	7642	0	0	12935	7340	0	0	0	0
3	11	3	"PAK1"	"YER129W"	12310	25960	70	10316	10289	5995	122	134	78	100	100	0	11525	10723	5775	79	94	56	100	100	0	0	0	0	0	0	0	0	0	0	0	0	0	0	0	0	0	0	0	0.891	0.955	0.957	0.906	1.825	0.968	0.905	0.000	0.000	0.000	0.000	0.000	0.000	0.000	0.000	0.000	0.000	0.000	0.000	0.000	0.000	32	236	21640	20811	-0.167	Error	Error	10194	11446	0	0	10167	10644	0	0	0	0
3	12	3	"SPT2"	"YER161C"	12510	25960	80	17148	14197	5871	123	133	61	100	100	0	6139	5585	1713	83	93	47	100	100	0	0	0	0	0	0	0	0	0	0	0	0	0	0	0	0	0	0	0	2.811	2.558	2.642	2.274	1.924	2.828	0.879	0.000	0.000	0.000	0.000	0.000	0.000	0.000	0.000	0.000	0.000	0.000	0.000	0.000	0.000	52	340	23081	19576	1.491	Error	Error	17025	6056	0	0	14074	5502	0	0	0	0
3	13	3	"UBC6"	"YER100W"	12720	25960	90	7694	6859	2364	114	125	56	100	100	0	5451	5096	1475	82	95	52	100	100	0	0	0	0	0	0	0	0	0	0	0	0	0	0	0	0	0	0	0	1.412	1.345	1.433	1.295	1.595	1.476	0.836	0.000	0.000	0.000	0.000	0.000	0.000	0.000	0.000	0.000	0.000	0.000	0.000	0.000	0.000	52	420	12949	11759	0.498	Error	Error	7580	5369	0	0	6745	5014	0	0	0	0
3	14	3	"RPS26B"	"YER131W"	12910	25950	90	8376	7637	4124	121	134	67	100	98	0	4651	3936	2536	87	105	58	88	86	0	0	0	0	0	0	0	0	0	0	0	0	0	0	0	0	0	0	0	1.809	1.953	1.957	2.654	3.205	1.929	0.823	0.000	0.000	0.000	0.000	0.000	0.000	0.000	0.000	0.000	0.000	0.000	0.000	0.000	0.000	52	420	12819	11365	0.855	Error	Error	8255	4564	0	0	7516	3849	0	0	0	0
3	15	3	""	"YER163C"	13110	25950	80	10643	9529	3131	131	151	82	100	100	0	1995	1797	756	84	104	64	92	92	0	0	0	0	0	0	0	0	0	0	0	0	0	0	0	0	0	0	0	5.501	5.486	5.260	5.223	1.630	5.716	0.832	0.000	0.000	0.000	0.000	0.000	0.000	0.000	0.000	0.000	0.000	0.000	0.000	0.000	0.000	52	340	12423	11111	2.460	Error	Error	10512	1911	0	0	9398	1713	0	0	0	0
3	16	3	"RPS8B"	"YER102W"	13320	25950	90	6910	6141	1865	126	134	63	100	100	0	1992	1833	574	75	86	39	100	100	0	0	0	0	0	0	0	0	0	0	0	0	0	0	0	0	0	0	0	3.539	3.422	3.463	3.395	1.783	3.630	0.852	0.000	0.000	0.000	0.000	0.000	0.000	0.000	0.000	0.000	0.000	0.000	0.000	0.000	0.000	52	420	8701	7773	1.823	Error	Error	6784	1917	0	0	6015	1758	0	0	0	0
3	17	3	"GLC7"	"YER133W"	13510	25960	80	8010	6662	3427	116	126	59	100	98	0	4185	3292	1916	77	92	48	90	90	0	0	0	0	0	0	0	0	0	0	0	0	0	0	0	0	0	0	0	1.922	2.036	1.931	2.281	2.138	2.026	0.870	0.000	0.000	0.000	0.000	0.000	0.000	0.000	0.000	0.000	0.000	0.000	0.000	0.000	0.000	52	340	12002	9761	0.942	Error	Error	7894	4108	0	0	6546	3215	0	0	0	0
3	18	3	"PAB1"	"YER165W"	13720	25950	70	11437	10221	3335	111	123	60	100	100	0	2500	2259	786	75	85	43	100	96	0	0	0	0	0	0	0	0	0	0	0	0	0	0	0	0	0	0	0	4.671	4.629	4.615	4.993	1.789	4.855	0.846	0.000	0.000	0.000	0.000	0.000	0.000	0.000	0.000	0.000	0.000	0.000	0.000	0.000	0.000	32	236	13751	12294	2.224	Error	Error	11326	2425	0	0	10110	2184	0	0	0	0
3	19	3	"CDC43"	"YGL155W"	13920	25950	80	10637	8954	4028	117	125	53	100	100	0	6705	5646	2683	73	85	42	98	94	0	0	0	0	0	0	0	0	0	0	0	0	0	0	0	0	0	0	0	1.586	1.586	1.522	1.931	2.830	1.619	0.846	0.000	0.000	0.000	0.000	0.000	0.000	0.000	0.000	0.000	0.000	0.000	0.000	0.000	0.000	52	340	17152	14410	0.666	Error	Error	10520	6632	0	0	8837	5573	0	0	0	0
3	20	3	"COX4"	"YGL187C"	14120	25950	80	5390	4859	1589	108	118	53	100	100	0	1574	1380	582	69	76	31	100	96	0	0	0	0	0	0	0	0	0	0	0	0	0	0	0	0	0	0	0	3.510	3.624	3.385	4.182	2.199	3.787	0.816	0.000	0.000	0.000	0.000	0.000	0.000	0.000	0.000	0.000	0.000	0.000	0.000	0.000	0.000	52	340	6787	6062	1.811	Error	Error	5282	1505	0	0	4751	1311	0	0	0	0
3	21	3	""	"YGL219C"	14320	25950	80	12393	10867	4835	111	122	58	98	98	0	3314	2972	1576	72	81	36	94	92	0	0	0	0	0	0	0	0	0	0	0	0	0	0	0	0	0	0	0	3.788	3.709	3.580	4.566	2.670	3.832	0.846	0.000	0.000	0.000	0.000	0.000	0.000	0.000	0.000	0.000	0.000	0.000	0.000	0.000	0.000	52	340	15524	13656	1.922	Error	Error	12282	3242	0	0	10756	2900	0	0	0	0
3	1	4	""	"YGL157W"	10310	26160	80	7007	6382	2057	107	115	54	100	100	0	4597	3995	1632	69	80	41	98	98	0	0	0	0	0	0	0	0	0	0	0	0	0	0	0	0	0	0	0	1.524	1.598	1.610	1.724	2.130	1.587	0.861	0.000	0.000	0.000	0.000	0.000	0.000	0.000	0.000	0.000	0.000	0.000	0.000	0.000	0.000	52	326	11428	10201	0.608	Error	Error	6900	4528	0	0	6275	3926	0	0	0	0
3	2	4	"RPS26A"	"YGL189C"	10510	26160	70	6247	6010	1374	102	115	59	100	100	0	3267	2985	952	74	93	129	96	96	0	0	0	0	0	0	0	0	0	0	0	0	0	0	0	0	0	0	0	1.925	2.030	2.024	2.282	2.192	1.978	0.851	0.000	0.000	0.000	0.000	0.000	0.000	0.000	0.000	0.000	0.000	0.000	0.000	0.000	0.000	32	236	9338	8819	0.945	Error	Error	6145	3193	0	0	5908	2911	0	0	0	0
3	3	4	"NIF3"	"YGL221C"	10710	26160	80	9464	8686	2138	120	128	55	100	100	0	3426	3074	1212	77	85	40	94	94	0	0	0	0	0	0	0	0	0	0	0	0	0	0	0	0	0	0	0	2.790	2.858	2.882	3.024	1.695	2.777	0.884	0.000	0.000	0.000	0.000	0.000	0.000	0.000	0.000	0.000	0.000	0.000	0.000	0.000	0.000	52	340	12693	11563	1.480	Error	Error	9344	3349	0	0	8566	2997	0	0	0	0
3	4	4	""	"YGL159W"	10910	26160	80	7199	6680	2310	118	127	75	100	100	0	3846	3325	1290	78	92	55	100	98	0	0	0	0	0	0	0	0	0	0	0	0	0	0	0	0	0	0	0	1.879	2.021	1.872	2.200	2.132	2.072	0.864	0.000	0.000	0.000	0.000	0.000	0.000	0.000	0.000	0.000	0.000	0.000	0.000	0.000	0.000	52	340	10849	9809	0.910	Error	Error	7081	3768	0	0	6562	3247	0	0	0	0
3	5	4	"COX13"	"YGL191W"	11120	26160	80	2742	2538	974	124	133	67	98	98	0	2157	2048	686	79	95	55	100	96	0	0	0	0	0	0	0	0	0	0	0	0	0	0	0	0	0	0	0	1.260	1.226	1.264	1.219	1.929	1.284	0.849	0.000	0.000	0.000	0.000	0.000	0.000	0.000	0.000	0.000	0.000	0.000	0.000	0.000	0.000	52	340	4696	4383	0.333	Error	Error	2618	2078	0	0	2414	1969	0	0	0	0
3	6	4	""	"YGL223C"	11310	26160	70	11820	11138	2694	118	121	52	100	100	0	9599	8879	2824	77	90	62	100	100	0	0	0	0	0	0	0	0	0	0	0	0	0	0	0	0	0	0	0	1.229	1.252	1.233	1.299	1.525	1.181	0.842	0.000	0.000	0.000	0.000	0.000	0.000	0.000	0.000	0.000	0.000	0.000	0.000	0.000	0.000	32	236	21224	19822	0.297	Error	Error	11702	9522	0	0	11020	8802	0	0	0	0
3	7	4	""	"YGL161C"	11520	26160	80	10574	9385	2796	121	126	51	100	100	0	4389	3833	1644	76	84	38	100	94	0	0	0	0	0	0	0	0	0	0	0	0	0	0	0	0	0	0	0	2.424	2.466	2.397	3.219	2.599	2.431	0.891	0.000	0.000	0.000	0.000	0.000	0.000	0.000	0.000	0.000	0.000	0.000	0.000	0.000	0.000	52	340	14766	13021	1.277	Error	Error	10453	4313	0	0	9264	3757	0	0	0	0
3	8	4	""	"YGL193C"	11710	26160	70	4844	4337	1470	118	120	64	96	96	0	3838	3334	1183	75	83	38	100	100	0	0	0	0	0	0	0	0	0	0	0	0	0	0	0	0	0	0	0	1.256	1.295	1.260	1.160	2.004	1.266	0.850	0.000	0.000	0.000	0.000	0.000	0.000	0.000	0.000	0.000	0.000	0.000	0.000	0.000	0.000	32	236	8489	7478	0.329	Error	Error	4726	3763	0	0	4219	3259	0	0	0	0
3	9	4	"GOG5"	"YGL225W"	11930	26160	80	9032	8357	2994	107	114	52	100	100	0	10355	9720	2792	72	79	42	100	100	0	0	0	0	0	0	0	0	0	0	0	0	0	0	0	0	0	0	0	0.868	0.855	0.843	0.810	2.065	0.876	0.876	0.000	0.000	0.000	0.000	0.000	0.000	0.000	0.000	0.000	0.000	0.000	0.000	0.000	0.000	52	340	19208	17898	-0.204	Error	Error	8925	10283	0	0	8250	9648	0	0	0	0
3	10	4	"RNH70"	"YGR276C"	12120	26160	70	11028	10213	2757	114	125	57	100	100	0	4988	4615	1063	74	84	38	100	100	0	0	0	0	0	0	0	0	0	0	0	0	0	0	0	0	0	0	0	2.221	2.224	2.274	2.142	1.471	2.253	0.855	0.000	0.000	0.000	0.000	0.000	0.000	0.000	0.000	0.000	0.000	0.000	0.000	0.000	0.000	32	236	15828	14640	1.151	Error	Error	10914	4914	0	0	10099	4541	0	0	0	0
3	11	4	""	"YHL012W"	12330	26150	70	7113	6400	1964	118	126	71	100	100	0	15030	14335	3726	75	101	175	100	100	0	0	0	0	0	0	0	0	0	0	0	0	0	0	0	0	0	0	0	0.468	0.441	0.431	0.426	1.351	0.419	0.869	0.000	0.000	0.000	0.000	0.000	0.000	0.000	0.000	0.000	0.000	0.000	0.000	0.000	0.000	32	236	21950	20542	-1.096	Error	Error	6995	14955	0	0	6282	14260	0	0	0	0
3	12	4	""	"YHL044W"	12530	26160	80	5204	4716	1747	113	121	57	100	100	0	4057	3975	747	75	85	46	100	100	0	0	0	0	0	0	0	0	0	0	0	0	0	0	0	0	0	0	0	1.279	1.180	1.212	1.075	1.567	1.281	0.844	0.000	0.000	0.000	0.000	0.000	0.000	0.000	0.000	0.000	0.000	0.000	0.000	0.000	0.000	52	340	9073	8503	0.354	Error	Error	5091	3982	0	0	4603	3900	0	0	0	0
3	13	4	""	"YGR278W"	12720	26160	80	8721	7691	3199	119	126	55	100	100	0	6282	5168	2392	77	90	46	94	92	0	0	0	0	0	0	0	0	0	0	0	0	0	0	0	0	0	0	0	1.386	1.487	1.553	1.728	2.514	1.504	0.839	0.000	0.000	0.000	0.000	0.000	0.000	0.000	0.000	0.000	0.000	0.000	0.000	0.000	0.000	52	340	14807	12663	0.471	Error	Error	8602	6205	0	0	7572	5091	0	0	0	0
3	14	4	"YLF2"	"YHL014C"	12920	26160	80	5919	5192	1981	125	148	259	100	100	0	13907	12779	4696	88	129	332	100	100	0	0	0	0	0	0	0	0	0	0	0	0	0	0	0	0	0	0	0	0.419	0.399	0.400	0.388	1.898	0.374	0.819	0.000	0.000	0.000	0.000	0.000	0.000	0.000	0.000	0.000	0.000	0.000	0.000	0.000	0.000	52	340	19613	17758	-1.254	Error	Error	5794	13819	0	0	5067	12691	0	0	0	0
3	15	4	""	"YHL046C"	13120	26160	90	14421	13728	4179	138	164	238	100	100	0	13379	12599	4643	93	130	301	96	96	0	0	0	0	0	0	0	0	0	0	0	0	0	0	0	0	0	0	0	1.075	1.087	1.097	1.275	2.229	1.062	0.884	0.000	0.000	0.000	0.000	0.000	0.000	0.000	0.000	0.000	0.000	0.000	0.000	0.000	0.000	52	420	27569	26096	0.104	Error	Error	14283	13286	0	0	13590	12506	0	0	0	0
3	16	4	""	"YGR280C"	13330	26160	80	9664	8225	3166	126	142	81	100	100	0	2213	2055	590	81	102	119	100	100	0	0	0	0	0	0	0	0	0	0	0	0	0	0	0	0	0	0	0	4.474	4.103	4.183	3.818	1.846	4.642	0.822	0.000	0.000	0.000	0.000	0.000	0.000	0.000	0.000	0.000	0.000	0.000	0.000	0.000	0.000	52	340	11670	10073	2.161	Error	Error	9538	2132	0	0	8099	1974	0	0	0	0
3	17	4	"DUR3"	"YHL016C"	13520	26160	70	11968	11011	2885	117	126	55	100	100	0	18106	17297	3659	79	88	41	100	100	0	0	0	0	0	0	0	0	0	0	0	0	0	0	0	0	0	0	0	0.657	0.633	0.646	0.617	1.562	0.598	0.858	0.000	0.000	0.000	0.000	0.000	0.000	0.000	0.000	0.000	0.000	0.000	0.000	0.000	0.000	32	236	29878	28112	-0.605	Error	Error	11851	18027	0	0	10894	17218	0	0	0	0
3	18	4	"COS8"	"YHL048W"	13730	26160	80	14955	11859	6207	120	124	53	100	100	0	10943	9795	4445	72	80	40	100	98	0	0	0	0	0	0	0	0	0	0	0	0	0	0	0	0	0	0	0	1.365	1.207	1.236	1.194	2.140	1.261	0.865	0.000	0.000	0.000	0.000	0.000	0.000	0.000	0.000	0.000	0.000	0.000	0.000	0.000	0.000	52	340	25706	21462	0.449	Error	Error	14835	10871	0	0	11739	9723	0	0	0	0
3	19	4	"BGL2"	"YGR282C"	13920	26160	80	6072	5675	1313	117	123	55	100	100	0	5563	5163	1477	72	80	36	100	100	0	0	0	0	0	0	0	0	0	0	0	0	0	0	0	0	0	0	0	1.085	1.092	1.077	1.140	1.724	1.061	0.828	0.000	0.000	0.000	0.000	0.000	0.000	0.000	0.000	0.000	0.000	0.000	0.000	0.000	0.000	52	340	11446	10649	0.117	Error	Error	5955	5491	0	0	5558	5091	0	0	0	0
3	20	4	""	"YHL018W"	14130	26160	80	5275	4814	1512	112	117	56	100	100	0	3729	3770	887	72	78	36	100	100	0	0	0	0	0	0	0	0	0	0	0	0	0	0	0	0	0	0	0	1.412	1.271	1.256	1.216	1.497	1.322	0.859	0.000	0.000	0.000	0.000	0.000	0.000	0.000	0.000	0.000	0.000	0.000	0.000	0.000	0.000	52	340	8820	8400	0.498	Error	Error	5163	3657	0	0	4702	3698	0	0	0	0
3	21	4	""	"YHL050C"	14330	26160	80	54504	43870	23953	109	116	54	100	100	42	21033	24660	14695	72	79	33	98	98	0	0	0	0	0	0	0	0	0	0	0	0	0	0	0	0	0	0	0	2.595	1.780	1.561	1.748	2.068	1.863	0.803	0.000	0.000	0.000	0.000	0.000	0.000	0.000	0.000	0.000	0.000	0.000	0.000	0.000	0.000	52	340	75356	68349	1.376	Error	Error	54395	20961	0	0	43761	24588	0	0	0	0
3	1	5	""	"YIL086C"	10310	26360	150	118	126	59	113	122	59	16	5	0	71	89	63	68	78	38	21	10	0	0	0	0	0	0	0	0	0	0	0	0	0	0	0	0	0	0	0	1.667	0.619	1.267	1.374	4.145	1.820	0.066	0.000	0.000	0.000	0.000	0.000	0.000	0.000	0.000	0.000	0.000	0.000	0.000	0.000	0.000	156	1074	8	34	0.737	Error	Error	5	3	0	0	13	21	0	0	-50	0
3	2	5	"RHO3"	"YIL118W"	10530	26360	80	4707	4436	1894	115	121	52	100	100	0	3239	2845	1397	73	84	39	100	98	0	0	0	0	0	0	0	0	0	0	0	0	0	0	0	0	0	0	0	1.450	1.559	1.574	1.737	1.931	1.542	0.862	0.000	0.000	0.000	0.000	0.000	0.000	0.000	0.000	0.000	0.000	0.000	0.000	0.000	0.000	52	340	7758	7093	0.536	Error	Error	4592	3166	0	0	4321	2772	0	0	0	0
3	3	5	"DNA43"	"YIL150C"	10710	26370	70	10633	10125	2398	117	124	62	100	100	0	4858	4622	1091	77	92	87	100	100	0	0	0	0	0	0	0	0	0	0	0	0	0	0	0	0	0	0	0	2.200	2.202	2.198	2.208	1.326	2.267	0.885	0.000	0.000	0.000	0.000	0.000	0.000	0.000	0.000	0.000	0.000	0.000	0.000	0.000	0.000	32	236	15297	14553	1.137	Error	Error	10516	4781	0	0	10008	4545	0	0	0	0
3	4	5	""	"YIL088C"	10920	26370	80	10382	8088	4118	120	134	71	100	100	0	7820	6269	3349	75	89	58	92	92	0	0	0	0	0	0	0	0	0	0	0	0	0	0	0	0	0	0	0	1.325	1.286	1.255	1.446	2.505	1.270	0.892	0.000	0.000	0.000	0.000	0.000	0.000	0.000	0.000	0.000	0.000	0.000	0.000	0.000	0.000	52	340	18007	14162	0.406	Error	Error	10262	7745	0	0	7968	6194	0	0	0	0
3	5	5	""	"YIL120W"	11120	26360	70	8741	7944	2519	111	122	71	100	100	0	8294	7836	2044	78	101	163	96	96	0	0	0	0	0	0	0	0	0	0	0	0	0	0	0	0	0	0	0	1.050	1.010	1.037	1.053	1.939	1.025	0.869	0.000	0.000	0.000	0.000	0.000	0.000	0.000	0.000	0.000	0.000	0.000	0.000	0.000	0.000	32	236	16846	15591	0.071	Error	Error	8630	8216	0	0	7833	7758	0	0	0	0
3	6	5	""	"YIL152W"	11330	26370	80	5215	4494	2476	128	140	76	100	98	0	8857	7766	4844	77	90	49	100	98	0	0	0	0	0	0	0	0	0	0	0	0	0	0	0	0	0	0	0	0.579	0.568	0.528	0.648	2.259	0.528	0.881	0.000	0.000	0.000	0.000	0.000	0.000	0.000	0.000	0.000	0.000	0.000	0.000	0.000	0.000	52	340	13867	12055	-0.787	Error	Error	5087	8780	0	0	4366	7689	0	0	0	0
3	7	5	""	"YIL090W"	11520	26370	70	9314	9070	4429	129	133	59	100	100	0	5271	4798	2450	72	81	35	100	100	0	0	0	0	0	0	0	0	0	0	0	0	0	0	0	0	0	0	0	1.767	1.892	1.810	1.840	1.718	1.889	0.850	0.000	0.000	0.000	0.000	0.000	0.000	0.000	0.000	0.000	0.000	0.000	0.000	0.000	0.000	32	236	14384	13667	0.821	Error	Error	9185	5199	0	0	8941	4726	0	0	0	0
3	8	5	""	"YIL122W"	11730	26370	70	9280	8118	2982	115	127	57	100	100	0	13154	11829	3754	75	87	44	100	100	0	0	0	0	0	0	0	0	0	0	0	0	0	0	0	0	0	0	0	0.701	0.681	0.683	0.660	1.356	0.712	0.872	0.000	0.000	0.000	0.000	0.000	0.000	0.000	0.000	0.000	0.000	0.000	0.000	0.000	0.000	32	236	22244	19757	-0.513	Error	Error	9165	13079	0	0	8003	11754	0	0	0	0
3	9	5	"IMP2'"	"YIL154C"	11930	26370	70	2343	2265	493	105	114	51	100	100	0	989	974	218	72	80	36	100	100	0	0	0	0	0	0	0	0	0	0	0	0	0	0	0	0	0	0	0	2.441	2.395	2.488	2.396	1.344	2.457	0.844	0.000	0.000	0.000	0.000	0.000	0.000	0.000	0.000	0.000	0.000	0.000	0.000	0.000	0.000	32	236	3155	3062	1.287	Error	Error	2238	917	0	0	2160	902	0	0	0	0
3	10	5	""	"YIL092W"	12130	26370	70	14353	13508	4751	113	119	52	100	100	0	13727	12906	3503	73	78	30	100	100	0	0	0	0	0	0	0	0	0	0	0	0	0	0	0	0	0	0	0	1.043	1.044	1.088	0.991	1.505	1.057	0.880	0.000	0.000	0.000	0.000	0.000	0.000	0.000	0.000	0.000	0.000	0.000	0.000	0.000	0.000	32	236	27894	26228	0.061	Error	Error	14240	13654	0	0	13395	12833	0	0	0	0
3	11	5	"AYR1"	"YIL124W"	12330	26360	80	7071	6283	2236	112	119	53	100	100	0	2710	2467	791	71	79	32	100	98	0	0	0	0	0	0	0	0	0	0	0	0	0	0	0	0	0	0	0	2.637	2.576	2.566	2.514	1.800	2.705	0.869	0.000	0.000	0.000	0.000	0.000	0.000	0.000	0.000	0.000	0.000	0.000	0.000	0.000	0.000	52	340	9598	8567	1.399	Error	Error	6959	2639	0	0	6171	2396	0	0	0	0
3	12	5	"UBP7"	"YIL156W"	12520	26370	70	11466	11275	6312	123	131	61	100	100	0	14871	13548	7258	81	87	37	100	100	0	0	0	0	0	0	0	0	0	0	0	0	0	0	0	0	0	0	0	0.767	0.828	0.850	0.801	1.567	0.824	0.891	0.000	0.000	0.000	0.000	0.000	0.000	0.000	0.000	0.000	0.000	0.000	0.000	0.000	0.000	32	236	26133	24619	-0.383	Error	Error	11343	14790	0	0	11152	13467	0	0	0	0
3	13	5	"BNA1"	"YJR025C"	12730	26370	70	5282	5399	3191	124	132	60	100	100	0	1632	1723	939	78	89	40	100	100	0	0	0	0	0	0	0	0	0	0	0	0	0	0	0	0	0	0	0	3.319	3.207	3.188	3.072	1.461	3.366	0.902	0.000	0.000	0.000	0.000	0.000	0.000	0.000	0.000	0.000	0.000	0.000	0.000	0.000	0.000	32	236	6712	6920	1.731	Error	Error	5158	1554	0	0	5275	1645	0	0	0	0
3	14	5	"CDC8"	"YJR057W"	12930	26360	80	6800	7041	3389	135	145	73	100	100	0	2336	2136	1113	81	98	51	94	94	0	0	0	0	0	0	0	0	0	0	0	0	0	0	0	0	0	0	0	2.956	3.361	3.417	3.513	2.048	3.451	0.888	0.000	0.000	0.000	0.000	0.000	0.000	0.000	0.000	0.000	0.000	0.000	0.000	0.000	0.000	52	340	8920	8961	1.563	Error	Error	6665	2255	0	0	6906	2055	0	0	0	0
3	15	5	"GRR1"	"YJR090C"	13130	26370	70	976	1691	1580	120	129	60	100	100	0	784	1371	1399	82	95	53	96	96	0	0	0	0	0	0	0	0	0	0	0	0	0	0	0	0	0	0	0	1.219	1.219	1.171	1.214	1.918	1.175	0.732	0.000	0.000	0.000	0.000	0.000	0.000	0.000	0.000	0.000	0.000	0.000	0.000	0.000	0.000	32	236	1558	2860	0.286	Error	Error	856	702	0	0	1571	1289	0	0	0	0
3	16	5	""	"YJR027W"	13330	26360	70	2577	7666	10755	132	146	73	100	96	0	1412	4827	6880	85	99	55	96	93	0	0	0	0	0	0	0	0	0	0	0	0	0	0	0	0	0	0	0	1.843	1.589	2.057	2.121	2.807	1.723	0.671	0.000	0.000	0.000	0.000	0.000	0.000	0.000	0.000	0.000	0.000	0.000	0.000	0.000	0.000	32	236	3772	12276	0.882	Error	Error	2445	1327	0	0	7534	4742	0	0	0	0
3	17	5	"PTK2"	"YJR059W"	13520	26360	70	1421	3055	3634	124	138	72	100	100	0	667	1307	1409	76	95	97	93	84	0	0	0	0	0	0	0	0	0	0	0	0	0	0	0	0	0	0	0	2.195	2.381	2.168	2.295	2.457	2.712	0.767	0.000	0.000	0.000	0.000	0.000	0.000	0.000	0.000	0.000	0.000	0.000	0.000	0.000	0.000	32	236	1888	4162	1.134	Error	Error	1297	591	0	0	2931	1231	0	0	0	0
3	18	5	"BUD4"	"YJR092W"	13730	26360	70	458	1330	1929	110	117	51	100	93	0	367	893	1276	70	81	48	93	81	0	0	0	0	0	0	0	0	0	0	0	0	0	0	0	0	0	0	0	1.172	1.482	1.281	1.662	2.502	1.574	0.812	0.000	0.000	0.000	0.000	0.000	0.000	0.000	0.000	0.000	0.000	0.000	0.000	0.000	0.000	32	236	645	2043	0.229	Error	Error	348	297	0	0	1220	823	0	0	0	0
3	19	5	""	"YJR029W"	13930	26360	70	1546	4115	7937	127	137	66	100	100	0	788	2329	4006	78	89	44	96	96	0	0	0	0	0	0	0	0	0	0	0	0	0	0	0	0	0	0	0	1.999	1.772	1.781	1.846	2.356	2.097	0.753	0.000	0.000	0.000	0.000	0.000	0.000	0.000	0.000	0.000	0.000	0.000	0.000	0.000	0.000	32	236	2129	6239	0.999	Error	Error	1419	710	0	0	3988	2251	0	0	0	0
3	20	5	""	"YJR061W"	14140	26370	70	604	1446	1843	113	126	69	90	84	0	449	1215	1619	67	74	32	100	96	0	0	0	0	0	0	0	0	0	0	0	0	0	0	0	0	0	0	0	1.285	1.161	1.353	1.269	2.109	1.163	0.818	0.000	0.000	0.000	0.000	0.000	0.000	0.000	0.000	0.000	0.000	0.000	0.000	0.000	0.000	32	236	873	2481	0.362	Error	Error	491	382	0	0	1333	1148	0	0	0	0
3	21	5	"IME1"	"YJR094C"	14330	26360	70	1119	3269	4630	108	115	57	100	96	0	818	2627	3966	72	77	36	100	100	0	0	0	0	0	0	0	0	0	0	0	0	0	0	0	0	0	0	0	1.355	1.237	1.173	1.223	1.850	1.207	0.812	0.000	0.000	0.000	0.000	0.000	0.000	0.000	0.000	0.000	0.000	0.000	0.000	0.000	0.000	32	236	1757	5716	0.439	Error	Error	1011	746	0	0	3161	2555	0	0	0	0
3	1	6	"GEA1"	"YJR031C"	10330	26570	70	803	2751	3902	118	125	59	96	93	0	565	2155	3090	69	82	44	100	96	0	0	0	0	0	0	0	0	0	0	0	0	0	0	0	0	0	0	0	1.381	1.262	1.183	1.152	2.229	1.296	0.799	0.000	0.000	0.000	0.000	0.000	0.000	0.000	0.000	0.000	0.000	0.000	0.000	0.000	0.000	32	236	1181	4719	0.466	Error	Error	685	496	0	0	2633	2086	0	0	0	0
3	2	6	"RPA12"	"YJR063W"	10530	26570	60	796	1899	2061	127	129	58	96	87	0	645	1028	968	84	92	42	100	93	0	0	0	0	0	0	0	0	0	0	0	0	0	0	0	0	0	0	0	1.193	1.877	1.363	1.422	2.798	2.332	0.654	0.000	0.000	0.000	0.000	0.000	0.000	0.000	0.000	0.000	0.000	0.000	0.000	0.000	0.000	32	176	1230	2716	0.254	Error	Error	669	561	0	0	1772	944	0	0	0	0
3	3	6	"SFC1"	"YJR095W"	10730	26570	70	421	986	1334	120	133	74	96	78	0	385	806	938	77	87	45	100	96	0	0	0	0	0	0	0	0	0	0	0	0	0	0	0	0	0	0	0	0.977	1.188	0.999	1.008	1.930	1.390	0.823	0.000	0.000	0.000	0.000	0.000	0.000	0.000	0.000	0.000	0.000	0.000	0.000	0.000	0.000	32	236	609	1595	-0.033	Error	Error	301	308	0	0	866	729	0	0	0	0
3	4	6	""	"YKR020W"	10920	26570	70	5380	5392	3835	117	137	77	100	100	0	1774	2072	1399	78	92	49	100	96	0	0	0	0	0	0	0	0	0	0	0	0	0	0	0	0	0	0	0	3.103	2.645	2.841	2.737	1.773	2.727	0.890	0.000	0.000	0.000	0.000	0.000	0.000	0.000	0.000	0.000	0.000	0.000	0.000	0.000	0.000	32	236	6959	7269	1.634	Error	Error	5263	1696	0	0	5275	1994	0	0	0	0
3	5	6	"MRS4"	"YKR052C"	11140	26570	60	947	1663	1955	119	126	63	93	87	0	1280	2718	3267	74	84	42	100	100	0	0	0	0	0	0	0	0	0	0	0	0	0	0	0	0	0	0	0	0.687	0.584	0.473	0.484	2.587	0.567	0.830	0.000	0.000	0.000	0.000	0.000	0.000	0.000	0.000	0.000	0.000	0.000	0.000	0.000	0.000	32	176	2034	4188	-0.543	Error	Error	828	1206	0	0	1544	2644	0	0	0	0
3	6	6	"HBS1"	"YKR084C"	11340	26570	80	461	1056	1668	126	140	66	78	75	0	409	909	1667	73	83	39	86	78	0	0	0	0	0	0	0	0	0	0	0	0	0	0	0	0	0	0	0	0.997	1.112	1.353	1.266	3.166	1.024	0.776	0.000	0.000	0.000	0.000	0.000	0.000	0.000	0.000	0.000	0.000	0.000	0.000	0.000	0.000	52	340	671	1766	-0.004	Error	Error	335	336	0	0	930	836	0	0	0	0
3	7	6	""	"YKR022C"	11530	26570	70	2812	4953	4768	119	127	61	100	100	0	4206	6416	5612	72	81	38	100	100	0	0	0	0	0	0	0	0	0	0	0	0	0	0	0	0	0	0	0	0.651	0.762	0.780	0.701	1.757	0.792	0.854	0.000	0.000	0.000	0.000	0.000	0.000	0.000	0.000	0.000	0.000	0.000	0.000	0.000	0.000	32	236	6827	11178	-0.618	Error	Error	2693	4134	0	0	4834	6344	0	0	0	0
3	8	6	"DYN1"	"YKR054C"	11730	26570	70	249	309	194	115	128	60	81	56	0	216	300	274	71	81	38	93	68	0	0	0	0	0	0	0	0	0	0	0	0	0	0	0	0	0	0	0	0.924	0.847	1.227	1.005	2.982	0.696	0.429	0.000	0.000	0.000	0.000	0.000	0.000	0.000	0.000	0.000	0.000	0.000	0.000	0.000	0.000	32	236	279	423	-0.114	Error	Error	134	145	0	0	194	229	0	0	0	0
3	9	6	"PRP16"	"YKR086W"	11920	26570	60	1536	3004	3416	112	125	56	100	100	0	1564	2727	3245	67	77	35	100	100	0	0	0	0	0	0	0	0	0	0	0	0	0	0	0	0	0	0	0	0.951	1.087	0.935	0.958	1.956	1.072	0.841	0.000	0.000	0.000	0.000	0.000	0.000	0.000	0.000	0.000	0.000	0.000	0.000	0.000	0.000	32	176	2921	5552	-0.072	Error	Error	1424	1497	0	0	2892	2660	0	0	0	0
3	10	6	"DBP7"	"YKR024C"	12130	26570	70	769	2085	3217	119	128	57	96	96	0	1173	3094	4673	72	78	31	100	100	0	0	0	0	0	0	0	0	0	0	0	0	0	0	0	0	0	0	0	0.590	0.651	0.610	0.632	1.994	0.636	0.737	0.000	0.000	0.000	0.000	0.000	0.000	0.000	0.000	0.000	0.000	0.000	0.000	0.000	0.000	32	236	1751	4988	-0.760	Error	Error	650	1101	0	0	1966	3022	0	0	0	0
3	11	6	"RNC1"	"YKR056W"	12330	26570	70	1832	4113	4887	118	125	56	96	96	0	643	1152	1137	74	85	47	96	96	0	0	0	0	0	0	0	0	0	0	0	0	0	0	0	0	0	0	0	3.012	3.706	2.870	2.845	3.105	4.516	0.790	0.000	0.000	0.000	0.000	0.000	0.000	0.000	0.000	0.000	0.000	0.000	0.000	0.000	0.000	32	236	2283	5073	1.591	Error	Error	1714	569	0	0	3995	1078	0	0	0	0
3	12	6	""	"YKR088C"	12530	26570	70	1096	2603	3411	111	124	61	100	100	0	780	1865	2363	80	89	38	100	100	0	0	0	0	0	0	0	0	0	0	0	0	0	0	0	0	0	0	0	1.407	1.396	1.454	1.298	2.203	1.506	0.743	0.000	0.000	0.000	0.000	0.000	0.000	0.000	0.000	0.000	0.000	0.000	0.000	0.000	0.000	32	236	1685	4277	0.493	Error	Error	985	700	0	0	2492	1785	0	0	0	0
3	13	6	"GCN3"	"YKR026C"	12730	26560	80	8193	6981	3065	115	129	62	100	100	0	3860	3398	1573	82	88	34	100	96	0	0	0	0	0	0	0	0	0	0	0	0	0	0	0	0	0	0	0	2.138	2.071	1.982	2.218	2.269	2.139	0.851	0.000	0.000	0.000	0.000	0.000	0.000	0.000	0.000	0.000	0.000	0.000	0.000	0.000	0.000	52	340	11856	10182	1.096	Error	Error	8078	3778	0	0	6866	3316	0	0	0	0
3	14	6	"GLG1"	"YKR058W"	12930	26570	80	4248	5586	5643	122	154	206	92	86	0	1268	1624	1550	81	104	121	86	73	0	0	0	0	0	0	0	0	0	0	0	0	0	0	0	0	0	0	0	3.476	3.541	3.095	2.880	2.268	3.838	0.857	0.000	0.000	0.000	0.000	0.000	0.000	0.000	0.000	0.000	0.000	0.000	0.000	0.000	0.000	52	340	5313	7007	1.797	Error	Error	4126	1187	0	0	5464	1543	0	0	0	0
3	15	6	""	"YKR090W"	13130	26580	100	1076	2625	3679	128	142	70	98	96	0	674	1380	1698	87	102	61	96	90	0	0	0	0	0	0	0	0	0	0	0	0	0	0	0	0	0	0	0	1.615	1.931	1.830	1.737	1.964	2.262	0.796	0.000	0.000	0.000	0.000	0.000	0.000	0.000	0.000	0.000	0.000	0.000	0.000	0.000	0.000	80	550	1535	3790	0.692	Error	Error	948	587	0	0	2497	1293	0	0	0	0
3	16	6	""	"YLR231C"	13340	26560	70	11301	9940	3183	128	147	82	100	100	0	5188	4563	1514	91	104	70	100	96	0	0	0	0	0	0	0	0	0	0	0	0	0	0	0	0	0	0	0	2.192	2.194	2.147	2.364	1.983	2.261	0.859	0.000	0.000	0.000	0.000	0.000	0.000	0.000	0.000	0.000	0.000	0.000	0.000	0.000	0.000	32	236	16270	14284	1.132	Error	Error	11173	5097	0	0	9812	4472	0	0	0	0
3	17	6	"RED1"	"YLR263W"	13540	26570	80	4580	5231	4382	120	137	172	94	92	0	2123	2589	2055	78	88	49	96	96	0	0	0	0	0	0	0	0	0	0	0	0	0	0	0	0	0	0	0	2.181	2.035	1.947	1.883	2.880	2.175	0.869	0.000	0.000	0.000	0.000	0.000	0.000	0.000	0.000	0.000	0.000	0.000	0.000	0.000	0.000	52	340	6505	7622	1.125	Error	Error	4460	2045	0	0	5111	2511	0	0	0	0
3	18	6	""	"YLR294C"	13740	26560	70	5615	5233	2060	111	127	70	100	100	0	1398	1211	502	71	84	43	100	96	0	0	0	0	0	0	0	0	0	0	0	0	0	0	0	0	0	0	0	4.148	4.493	4.092	4.739	2.036	4.743	0.796	0.000	0.000	0.000	0.000	0.000	0.000	0.000	0.000	0.000	0.000	0.000	0.000	0.000	0.000	32	236	6831	6262	2.052	Error	Error	5504	1327	0	0	5122	1140	0	0	0	0
3	19	6	"EST1"	"YLR233C"	13930	26570	70	7665	7135	1804	118	128	59	100	100	0	3397	3236	763	77	88	40	100	100	0	0	0	0	0	0	0	0	0	0	0	0	0	0	0	0	0	0	0	2.273	2.221	2.255	2.217	1.282	2.270	0.864	0.000	0.000	0.000	0.000	0.000	0.000	0.000	0.000	0.000	0.000	0.000	0.000	0.000	0.000	32	236	10867	10176	1.185	Error	Error	7547	3320	0	0	7017	3159	0	0	0	0
3	20	6	""	"YLR265C"	14140	26570	80	3388	3273	2328	112	123	60	94	90	0	4709	4995	3081	69	79	40	100	100	0	0	0	0	0	0	0	0	0	0	0	0	0	0	0	0	0	0	0	0.706	0.642	0.664	0.515	2.528	0.667	0.845	0.000	0.000	0.000	0.000	0.000	0.000	0.000	0.000	0.000	0.000	0.000	0.000	0.000	0.000	52	340	7916	8087	-0.502	Error	Error	3276	4640	0	0	3161	4926	0	0	0	0
3	21	6	""	"YLR296W"	14330	26560	80	1866	1689	850	109	114	50	98	92	0	564	478	290	70	81	37	82	76	0	0	0	0	0	0	0	0	0	0	0	0	0	0	0	0	0	0	0	3.557	3.873	3.740	4.685	2.614	3.941	0.777	0.000	0.000	0.000	0.000	0.000	0.000	0.000	0.000	0.000	0.000	0.000	0.000	0.000	0.000	52	340	2251	1988	1.831	Error	Error	1757	494	0	0	1580	408	0	0	0	0
3	1	7	""	"YLR235C"	10340	26770	80	2885	2615	1003	104	115	55	100	98	0	1896	1776	627	69	78	37	96	94	0	0	0	0	0	0	0	0	0	0	0	0	0	0	0	0	0	0	0	1.522	1.471	1.514	1.570	2.265	1.515	0.876	0.000	0.000	0.000	0.000	0.000	0.000	0.000	0.000	0.000	0.000	0.000	0.000	0.000	0.000	52	340	4608	4218	0.606	Error	Error	2781	1827	0	0	2511	1707	0	0	0	0
3	2	7	"BOP2"	"YLR267W"	10530	26780	70	10346	9850	2805	112	123	58	100	100	0	5221	4777	1488	80	93	52	100	100	0	0	0	0	0	0	0	0	0	0	0	0	0	0	0	0	0	0	0	1.991	2.073	2.061	2.131	1.352	2.092	0.875	0.000	0.000	0.000	0.000	0.000	0.000	0.000	0.000	0.000	0.000	0.000	0.000	0.000	0.000	32	236	15375	14435	0.993	Error	Error	10234	5141	0	0	9738	4697	0	0	0	0
3	3	7	"YHC1"	"YLR298C"	10720	26770	70	5354	4953	1335	117	128	57	100	100	0	1541	1375	486	79	94	75	100	100	0	0	0	0	0	0	0	0	0	0	0	0	0	0	0	0	0	0	0	3.582	3.731	3.578	3.992	1.649	3.740	0.850	0.000	0.000	0.000	0.000	0.000	0.000	0.000	0.000	0.000	0.000	0.000	0.000	0.000	0.000	32	236	6699	6132	1.841	Error	Error	5237	1462	0	0	4836	1296	0	0	0	0
3	4	7	"THI7"	"YLR237W"	10930	26770	70	11162	10465	2136	114	130	88	100	100	0	4445	4191	980	78	88	42	100	100	0	0	0	0	0	0	0	0	0	0	0	0	0	0	0	0	0	0	0	2.530	2.517	2.533	2.612	1.480	2.482	0.899	0.000	0.000	0.000	0.000	0.000	0.000	0.000	0.000	0.000	0.000	0.000	0.000	0.000	0.000	32	236	15415	14464	1.339	Error	Error	11048	4367	0	0	10351	4113	0	0	0	0
3	5	7	""	"YLR269C"	11130	26770	80	2255	2089	757	109	118	49	100	100	0	1623	1425	642	70	81	40	92	90	0	0	0	0	0	0	0	0	0	0	0	0	0	0	0	0	0	0	0	1.382	1.461	1.464	1.954	2.761	1.409	0.866	0.000	0.000	0.000	0.000	0.000	0.000	0.000	0.000	0.000	0.000	0.000	0.000	0.000	0.000	52	340	3699	3335	0.467	Error	Error	2146	1553	0	0	1980	1355	0	0	0	0
3	6	7	"EXG1"	"YLR300W"	11330	26780	80	8472	7262	2576	116	124	57	100	100	0	2307	2048	852	75	84	39	94	94	0	0	0	0	0	0	0	0	0	0	0	0	0	0	0	0	0	0	0	3.744	3.622	3.654	3.922	1.866	3.712	0.876	0.000	0.000	0.000	0.000	0.000	0.000	0.000	0.000	0.000	0.000	0.000	0.000	0.000	0.000	52	340	10588	9119	1.904	Error	Error	8356	2232	0	0	7146	1973	0	0	0	0
3	7	7	"MVP1"	"YMR004W"	11540	26770	70	1357	2492	2402	116	126	71	100	100	0	2347	5296	5205	76	85	42	100	100	0	0	0	0	0	0	0	0	0	0	0	0	0	0	0	0	0	0	0	0.546	0.455	0.474	0.478	1.945	0.434	0.844	0.000	0.000	0.000	0.000	0.000	0.000	0.000	0.000	0.000	0.000	0.000	0.000	0.000	0.000	32	236	3512	7596	-0.872	Error	Error	1241	2271	0	0	2376	5220	0	0	0	0
3	8	7	"IMP2"	"YMR035W"	11740	26770	70	2259	3339	2780	117	125	58	100	100	0	3712	5509	4452	73	81	38	100	100	0	0	0	0	0	0	0	0	0	0	0	0	0	0	0	0	0	0	0	0.589	0.593	0.565	0.544	1.684	0.590	0.895	0.000	0.000	0.000	0.000	0.000	0.000	0.000	0.000	0.000	0.000	0.000	0.000	0.000	0.000	32	236	5781	8658	-0.765	Error	Error	2142	3639	0	0	3222	5436	0	0	0	0
3	9	7	"SOV1"	"YMR066W"	11940	26770	70	1310	2238	2643	118	124	62	100	100	0	1087	2157	2654	70	76	33	100	100	0	0	0	0	0	0	0	0	0	0	0	0	0	0	0	0	0	0	0	1.172	1.016	0.993	0.916	2.170	1.001	0.677	0.000	0.000	0.000	0.000	0.000	0.000	0.000	0.000	0.000	0.000	0.000	0.000	0.000	0.000	32	236	2209	4207	0.229	Error	Error	1192	1017	0	0	2120	2087	0	0	0	0
3	10	7	"PLB2"	"YMR006C"	12140	26770	60	1325	2681	3671	114	123	64	100	96	0	3349	7693	9015	66	77	36	100	100	0	0	0	0	0	0	0	0	0	0	0	0	0	0	0	0	0	0	0	0.369	0.337	0.309	0.275	1.993	0.361	0.851	0.000	0.000	0.000	0.000	0.000	0.000	0.000	0.000	0.000	0.000	0.000	0.000	0.000	0.000	32	176	4494	10194	-1.439	Error	Error	1211	3283	0	0	2567	7627	0	0	0	0
3	11	7	"MSN2"	"YMR037C"	12330	26770	70	1994	3582	3865	113	125	57	100	100	0	962	1748	1698	71	80	37	100	100	0	0	0	0	0	0	0	0	0	0	0	0	0	0	0	0	0	0	0	2.111	2.069	2.080	2.172	2.248	2.439	0.720	0.000	0.000	0.000	0.000	0.000	0.000	0.000	0.000	0.000	0.000	0.000	0.000	0.000	0.000	32	236	2772	5146	1.078	Error	Error	1881	891	0	0	3469	1677	0	0	0	0
3	12	7	""	"YMR068W"	12540	26780	70	2690	4100	3728	117	127	57	100	93	0	1569	2017	1484	76	87	44	100	100	0	0	0	0	0	0	0	0	0	0	0	0	0	0	0	0	0	0	0	1.723	2.052	1.694	1.625	2.074	2.442	0.789	0.000	0.000	0.000	0.000	0.000	0.000	0.000	0.000	0.000	0.000	0.000	0.000	0.000	0.000	32	236	4066	5924	0.785	Error	Error	2573	1493	0	0	3983	1941	0	0	0	0
3	13	7	"PLB1"	"YMR008C"	12730	26770	70	15673	15608	5530	119	126	56	100	100	0	11947	10476	4535	82	90	41	100	100	0	0	0	0	0	0	0	0	0	0	0	0	0	0	0	0	0	0	0	1.311	1.490	1.409	1.666	2.153	1.423	0.816	0.000	0.000	0.000	0.000	0.000	0.000	0.000	0.000	0.000	0.000	0.000	0.000	0.000	0.000	32	236	27419	25883	0.391	Error	Error	15554	11865	0	0	15489	10394	0	0	0	0
3	14	7	"SUB1"	"YMR039C"	12940	26770	70	10658	9566	2585	123	138	65	100	100	0	3635	3174	1089	74	85	44	96	96	0	0	0	0	0	0	0	0	0	0	0	0	0	0	0	0	0	0	0	2.958	3.046	2.859	3.007	1.467	3.054	0.855	0.000	0.000	0.000	0.000	0.000	0.000	0.000	0.000	0.000	0.000	0.000	0.000	0.000	0.000	32	236	14096	12543	1.565	Error	Error	10535	3561	0	0	9443	3100	0	0	0	0
3	15	7	"MOT3"	"YMR070W"	13140	26770	70	8997	7867	3073	135	138	57	100	100	0	4971	4340	1752	88	103	51	100	100	0	0	0	0	0	0	0	0	0	0	0	0	0	0	0	0	0	0	0	1.815	1.818	1.775	1.848	1.600	1.896	0.883	0.000	0.000	0.000	0.000	0.000	0.000	0.000	0.000	0.000	0.000	0.000	0.000	0.000	0.000	32	236	13745	11984	0.860	Error	Error	8862	4883	0	0	7732	4252	0	0	0	0
3	16	7	""	"YMR010W"	13340	26770	80	6820	6687	1380	128	137	60	100	100	0	5270	4983	1453	85	103	64	100	100	0	0	0	0	0	0	0	0	0	0	0	0	0	0	0	0	0	0	0	1.291	1.339	1.326	1.437	1.765	1.307	0.849	0.000	0.000	0.000	0.000	0.000	0.000	0.000	0.000	0.000	0.000	0.000	0.000	0.000	0.000	52	340	11877	11457	0.368	Error	Error	6692	5185	0	0	6559	4898	0	0	0	0
3	17	7	""	"YMR041C"	13540	26770	80	6222	6057	1411	118	130	58	100	100	0	2252	2106	706	77	87	42	100	100	0	0	0	0	0	0	0	0	0	0	0	0	0	0	0	0	0	0	0	2.806	2.927	2.679	3.232	1.897	3.008	0.838	0.000	0.000	0.000	0.000	0.000	0.000	0.000	0.000	0.000	0.000	0.000	0.000	0.000	0.000	52	340	8279	7968	1.489	Error	Error	6104	2175	0	0	5939	2029	0	0	0	0
3	18	7	"ABF2"	"YMR072W"	13740	26770	80	3831	3543	1300	126	132	57	100	100	0	3507	2997	1277	73	84	41	100	100	0	0	0	0	0	0	0	0	0	0	0	0	0	0	0	0	0	0	0	1.079	1.169	1.120	1.273	2.267	1.151	0.851	0.000	0.000	0.000	0.000	0.000	0.000	0.000	0.000	0.000	0.000	0.000	0.000	0.000	0.000	52	340	7139	6341	0.110	Error	Error	3705	3434	0	0	3417	2924	0	0	0	0
3	19	7	""	"YNL046W"	13950	26770	80	11085	9500	3689	120	126	56	100	100	0	4387	3994	1383	69	81	41	100	98	0	0	0	0	0	0	0	0	0	0	0	0	0	0	0	0	0	0	0	2.539	2.390	2.394	2.355	1.997	2.542	0.886	0.000	0.000	0.000	0.000	0.000	0.000	0.000	0.000	0.000	0.000	0.000	0.000	0.000	0.000	52	340	15283	13305	1.344	Error	Error	10965	4318	0	0	9380	3925	0	0	0	0
3	20	7	"TPM1"	"YNL079C"	14140	26770	80	7693	6919	1975	111	120	54	100	100	0	3112	2920	723	69	79	38	100	100	0	0	0	0	0	0	0	0	0	0	0	0	0	0	0	0	0	0	0	2.492	2.388	2.441	2.356	1.638	2.553	0.859	0.000	0.000	0.000	0.000	0.000	0.000	0.000	0.000	0.000	0.000	0.000	0.000	0.000	0.000	52	340	10625	9659	1.317	Error	Error	7582	3043	0	0	6808	2851	0	0	0	0
3	21	7	"CYB5"	"YNL111C"	14340	26770	70	4432	4014	1358	103	107	45	100	100	0	5597	4917	1579	72	77	28	100	100	0	0	0	0	0	0	0	0	0	0	0	0	0	0	0	0	0	0	0	0.784	0.807	0.791	0.802	1.478	0.785	0.854	0.000	0.000	0.000	0.000	0.000	0.000	0.000	0.000	0.000	0.000	0.000	0.000	0.000	0.000	32	236	9854	8756	-0.352	Error	Error	4329	5525	0	0	3911	4845	0	0	0	0
3	1	8	"ALG11"	"YNL048W"	10330	26980	70	9604	9249	1632	106	114	53	100	100	0	8629	8451	1375	68	76	35	100	100	0	0	0	0	0	0	0	0	0	0	0	0	0	0	0	0	0	0	0	1.109	1.091	1.097	1.087	1.167	1.081	0.870	0.000	0.000	0.000	0.000	0.000	0.000	0.000	0.000	0.000	0.000	0.000	0.000	0.000	0.000	32	236	18059	17526	0.150	Error	Error	9498	8561	0	0	9143	8383	0	0	0	0
3	2	8	""	"YNL081C"	10540	26970	80	3398	3152	1239	106	118	54	100	100	0	7003	5647	2874	78	93	51	96	96	0	0	0	0	0	0	0	0	0	0	0	0	0	0	0	0	0	0	0	0.475	0.547	0.533	0.685	2.597	0.495	0.855	0.000	0.000	0.000	0.000	0.000	0.000	0.000	0.000	0.000	0.000	0.000	0.000	0.000	0.000	52	340	10217	8615	-1.073	Error	Error	3292	6925	0	0	3046	5569	0	0	0	0
3	3	8	"RPC19"	"YNL113W"	10740	26980	80	4924	4193	1660	110	116	54	100	100	0	2355	1980	951	75	85	43	92	92	0	0	0	0	0	0	0	0	0	0	0	0	0	0	0	0	0	0	0	2.111	2.143	2.004	2.144	1.767	2.144	0.872	0.000	0.000	0.000	0.000	0.000	0.000	0.000	0.000	0.000	0.000	0.000	0.000	0.000	0.000	52	340	7094	5988	1.078	Error	Error	4814	2280	0	0	4083	1905	0	0	0	0
3	4	8	""	"YNL050C"	10940	26980	80	3168	2875	863	108	116	54	100	100	0	6833	6427	1437	76	85	39	100	100	0	0	0	0	0	0	0	0	0	0	0	0	0	0	0	0	0	0	0	0.453	0.436	0.448	0.417	1.407	0.439	0.854	0.000	0.000	0.000	0.000	0.000	0.000	0.000	0.000	0.000	0.000	0.000	0.000	0.000	0.000	52	340	9817	9118	-1.143	Error	Error	3060	6757	0	0	2767	6351	0	0	0	0
3	5	8	""	"YNL083W"	11140	26980	70	11438	9994	3012	109	121	65	100	100	0	9261	8586	1913	70	80	37	100	100	0	0	0	0	0	0	0	0	0	0	0	0	0	0	0	0	0	0	0	1.233	1.161	1.218	1.126	1.309	1.241	0.855	0.000	0.000	0.000	0.000	0.000	0.000	0.000	0.000	0.000	0.000	0.000	0.000	0.000	0.000	32	236	20520	18401	0.302	Error	Error	11329	9191	0	0	9885	8516	0	0	0	0
3	6	8	""	"YNL115C"	11350	26970	80	9851	8550	3797	118	194	1248	92	86	0	10250	8953	3806	77	265	2359	90	82	0	0	0	0	0	0	0	0	0	0	0	0	0	0	0	0	0	0	0	0.957	0.950	0.925	1.053	2.614	0.958	0.879	0.000	0.000	0.000	0.000	0.000	0.000	0.000	0.000	0.000	0.000	0.000	0.000	0.000	0.000	52	340	19906	17308	-0.064	Error	Error	9733	10173	0	0	8432	8876	0	0	0	0
3	7	8	"COX5A"	"YNL052W"	11550	26970	90	2720	2517	810	110	119	58	98	98	0	1481	1355	449	69	78	36	98	98	0	0	0	0	0	0	0	0	0	0	0	0	0	0	0	0	0	0	0	1.848	1.872	1.815	1.831	1.855	1.906	0.849	0.000	0.000	0.000	0.000	0.000	0.000	0.000	0.000	0.000	0.000	0.000	0.000	0.000	0.000	52	420	4022	3693	0.886	Error	Error	2610	1412	0	0	2407	1286	0	0	0	0
3	8	8	"MKT1"	"YNL085W"	11740	26980	70	11322	10586	3429	115	122	52	100	100	0	11362	10885	2878	73	82	40	100	100	0	0	0	0	0	0	0	0	0	0	0	0	0	0	0	0	0	0	0	0.993	0.968	1.002	0.950	1.451	0.981	0.875	0.000	0.000	0.000	0.000	0.000	0.000	0.000	0.000	0.000	0.000	0.000	0.000	0.000	0.000	32	236	22496	21283	-0.011	Error	Error	11207	11289	0	0	10471	10812	0	0	0	0
3	9	8	"MLS1"	"YNL117W"	11940	26980	80	10187	8338	4195	127	136	60	98	98	0	3684	3122	1341	70	80	38	98	98	0	0	0	0	0	0	0	0	0	0	0	0	0	0	0	0	0	0	0	2.784	2.690	2.740	2.205	2.249	2.968	0.861	0.000	0.000	0.000	0.000	0.000	0.000	0.000	0.000	0.000	0.000	0.000	0.000	0.000	0.000	52	340	13674	11263	1.477	Error	Error	10060	3614	0	0	8211	3052	0	0	0	0
3	10	8	""	"YOL015W"	12140	26980	70	2344	2728	1788	109	124	72	96	96	0	3050	3609	2424	67	78	45	100	100	0	0	0	0	0	0	0	0	0	0	0	0	0	0	0	0	0	0	0	0.749	0.739	0.764	0.741	2.109	0.722	0.803	0.000	0.000	0.000	0.000	0.000	0.000	0.000	0.000	0.000	0.000	0.000	0.000	0.000	0.000	32	236	5218	6161	-0.416	Error	Error	2235	2983	0	0	2619	3542	0	0	0	0
3	11	8	""	"YOL047C"	12350	26970	80	6097	5275	1876	118	127	66	100	100	0	4254	3868	1290	72	80	38	100	100	0	0	0	0	0	0	0	0	0	0	0	0	0	0	0	0	0	0	0	1.430	1.359	1.339	1.331	1.802	1.402	0.856	0.000	0.000	0.000	0.000	0.000	0.000	0.000	0.000	0.000	0.000	0.000	0.000	0.000	0.000	52	340	10161	8953	0.516	Error	Error	5979	4182	0	0	5157	3796	0	0	0	0
3	12	8	""	"YOL079W"	12540	26980	70	565	671	404	119	129	70	90	90	0	491	542	332	70	81	57	90	87	0	0	0	0	0	0	0	0	0	0	0	0	0	0	0	0	0	0	0	1.059	1.169	1.138	1.178	1.977	1.263	0.685	0.000	0.000	0.000	0.000	0.000	0.000	0.000	0.000	0.000	0.000	0.000	0.000	0.000	0.000	32	236	867	1024	0.083	Error	Error	446	421	0	0	552	472	0	0	0	0
3	13	8	""	"YOL017W"	12740	26970	70	12093	11314	2756	115	124	59	100	100	0	10593	9769	2782	79	85	37	100	100	0	0	0	0	0	0	0	0	0	0	0	0	0	0	0	0	0	0	0	1.139	1.156	1.143	1.224	1.686	1.073	0.870	0.000	0.000	0.000	0.000	0.000	0.000	0.000	0.000	0.000	0.000	0.000	0.000	0.000	0.000	32	236	22492	20889	0.188	Error	Error	11978	10514	0	0	11199	9690	0	0	0	0
3	14	8	"GSH2"	"YOL049W"	12950	26980	90	658	1095	1184	125	155	264	61	50	0	710	1171	1221	75	115	430	57	44	0	0	0	0	0	0	0	0	0	0	0	0	0	0	0	0	0	0	0	0.839	0.885	0.789	0.786	2.334	0.788	0.642	0.000	0.000	0.000	0.000	0.000	0.000	0.000	0.000	0.000	0.000	0.000	0.000	0.000	0.000	52	420	1168	2066	-0.253	Error	Error	533	635	0	0	970	1096	0	0	0	0
3	15	8	"IRA2"	"YOL081W"	13140	26970	50	378	443	193	114	125	60	91	83	0	339	363	176	79	100	55	100	83	0	0	0	0	0	0	0	0	0	0	0	0	0	0	0	0	0	0	0	1.015	1.158	1.021	1.125	1.807	1.116	0.490	0.000	0.000	0.000	0.000	0.000	0.000	0.000	0.000	0.000	0.000	0.000	0.000	0.000	0.000	12	104	524	613	0.022	Error	Error	264	260	0	0	329	284	0	0	0	0
3	16	8	""	"YOL019W"	13350	26970	80	13237	11246	5477	123	133	62	100	100	0	16734	13592	6089	88	98	47	98	98	0	0	0	0	0	0	0	0	0	0	0	0	0	0	0	0	0	0	0	0.788	0.824	0.813	0.879	2.692	0.828	0.866	0.000	0.000	0.000	0.000	0.000	0.000	0.000	0.000	0.000	0.000	0.000	0.000	0.000	0.000	52	340	29760	24627	-0.344	Error	Error	13114	16646	0	0	11123	13504	0	0	0	0
3	17	8	"GAL11"	"YOL051W"	13550	26980	70	12311	11146	4937	119	127	58	100	100	0	5876	5107	1803	81	90	44	100	100	0	0	0	0	0	0	0	0	0	0	0	0	0	0	0	0	0	0	0	2.104	2.194	2.343	2.060	1.573	2.355	0.900	0.000	0.000	0.000	0.000	0.000	0.000	0.000	0.000	0.000	0.000	0.000	0.000	0.000	0.000	32	236	17987	16053	1.073	Error	Error	12192	5795	0	0	11027	5026	0	0	0	0
3	18	8	""	"YOL083W"	13740	26970	90	7825	7640	1265	115	127	72	100	100	0	3359	3164	810	74	84	45	98	98	0	0	0	0	0	0	0	0	0	0	0	0	0	0	0	0	0	0	0	2.347	2.435	2.337	2.504	1.591	2.426	0.863	0.000	0.000	0.000	0.000	0.000	0.000	0.000	0.000	0.000	0.000	0.000	0.000	0.000	0.000	52	420	10995	10615	1.231	Error	Error	7710	3285	0	0	7525	3090	0	0	0	0
3	19	8	"DIS3"	"YOL021C"	13950	26970	80	15401	14133	6154	114	119	52	100	100	0	8618	7188	2998	75	83	40	100	100	0	0	0	0	0	0	0	0	0	0	0	0	0	0	0	0	0	0	0	1.789	1.971	1.973	2.089	2.207	2.068	0.881	0.000	0.000	0.000	0.000	0.000	0.000	0.000	0.000	0.000	0.000	0.000	0.000	0.000	0.000	52	340	23830	21132	0.839	Error	Error	15287	8543	0	0	14019	7113	0	0	0	0
3	20	8	""	"YOL053C-A"	14140	26970	70	1947	1843	574	104	114	51	100	100	0	1703	1594	607	73	89	46	100	96	0	0	0	0	0	0	0	0	0	0	0	0	0	0	0	0	0	0	0	1.131	1.143	1.115	1.169	2.301	1.096	0.858	0.000	0.000	0.000	0.000	0.000	0.000	0.000	0.000	0.000	0.000	0.000	0.000	0.000	0.000	32	236	3473	3260	0.177	Error	Error	1843	1630	0	0	1739	1521	0	0	0	0
3	21	8	""	"YOL085C"	14350	26970	70	1329	1261	371	110	119	57	100	96	0	408	411	156	78	89	44	93	93	0	0	0	0	0	0	0	0	0	0	0	0	0	0	0	0	0	0	0	3.694	3.456	3.591	3.450	1.578	3.834	0.682	0.000	0.000	0.000	0.000	0.000	0.000	0.000	0.000	0.000	0.000	0.000	0.000	0.000	0.000	32	236	1549	1484	1.885	Error	Error	1219	330	0	0	1151	333	0	0	0	0
3	1	9	"KIN4"	"YOR233W"	10340	27180	80	10779	9668	5712	110	118	56	100	100	0	17250	15717	9270	71	81	43	100	100	0	0	0	0	0	0	0	0	0	0	0	0	0	0	0	0	0	0	0	0.621	0.611	0.582	0.595	2.258	0.583	0.847	0.000	0.000	0.000	0.000	0.000	0.000	0.000	0.000	0.000	0.000	0.000	0.000	0.000	0.000	52	340	27848	25204	-0.687	Error	Error	10669	17179	0	0	9558	15646	0	0	0	0
3	2	9	"RBL2"	"YOR265W"	10540	27180	70	4587	4286	1331	116	123	57	100	100	0	4367	4069	1307	78	100	98	100	100	0	0	0	0	0	0	0	0	0	0	0	0	0	0	0	0	0	0	0	1.042	1.045	1.003	1.024	1.634	0.983	0.861	0.000	0.000	0.000	0.000	0.000	0.000	0.000	0.000	0.000	0.000	0.000	0.000	0.000	0.000	32	236	8760	8161	0.060	Error	Error	4471	4289	0	0	4170	3991	0	0	0	0
3	3	9	"TIM18"	"YOR297C"	10740	27180	80	3167	2885	1089	111	118	55	98	98	0	4094	3859	1496	71	80	58	98	96	0	0	0	0	0	0	0	0	0	0	0	0	0	0	0	0	0	0	0	0.760	0.732	0.694	0.767	1.959	0.714	0.869	0.000	0.000	0.000	0.000	0.000	0.000	0.000	0.000	0.000	0.000	0.000	0.000	0.000	0.000	52	340	7079	6562	-0.397	Error	Error	3056	4023	0	0	2774	3788	0	0	0	0
3	4	9	"SNR17A"	"YOR235W"	10950	27180	80	2468	2394	927	124	130	57	100	100	0	1275	1217	504	76	91	49	100	98	0	0	0	0	0	0	0	0	0	0	0	0	0	0	0	0	0	0	0	1.955	1.989	1.986	2.068	1.881	2.086	0.837	0.000	0.000	0.000	0.000	0.000	0.000	0.000	0.000	0.000	0.000	0.000	0.000	0.000	0.000	52	340	3543	3411	0.967	Error	Error	2344	1199	0	0	2270	1141	0	0	0	0
3	5	9	""	"YOR267C"	11150	27180	80	15899	13276	8178	131	145	76	100	100	0	10644	10270	5294	80	96	56	100	100	0	0	0	0	0	0	0	0	0	0	0	0	0	0	0	0	0	0	0	1.493	1.290	1.326	1.122	2.231	1.382	0.899	0.000	0.000	0.000	0.000	0.000	0.000	0.000	0.000	0.000	0.000	0.000	0.000	0.000	0.000	52	340	26332	23335	0.578	Error	Error	15768	10564	0	0	13145	10190	0	0	0	0
3	6	9	"BUD7"	"YOR299W"	11340	27170	70	13639	13020	4094	122	233	1498	100	100	0	4395	4343	1281	76	351	2829	87	18	0	0	0	0	0	0	0	0	0	0	0	0	0	0	0	0	0	0	0	3.130	3.023	3.060	3.015	1.419	3.225	0.876	0.000	0.000	0.000	0.000	0.000	0.000	0.000	0.000	0.000	0.000	0.000	0.000	0.000	0.000	32	236	17836	17165	1.646	Error	Error	13517	4319	0	0	12898	4267	0	0	0	0
3	7	9	"HES1"	"YOR237W"	11540	27180	80	7199	6695	2325	120	126	53	100	100	0	5665	5172	1390	73	84	40	100	100	0	0	0	0	0	0	0	0	0	0	0	0	0	0	0	0	0	0	0	1.266	1.289	1.357	1.276	1.710	1.381	0.839	0.000	0.000	0.000	0.000	0.000	0.000	0.000	0.000	0.000	0.000	0.000	0.000	0.000	0.000	52	326	12671	11674	0.340	Error	Error	7079	5592	0	0	6575	5099	0	0	0	0
3	8	9	"PAC1"	"YOR269W"	11750	27170	80	12109	10151	4179	114	123	65	100	100	0	15704	13380	4951	79	85	38	100	100	0	0	0	0	0	0	0	0	0	0	0	0	0	0	0	0	0	0	0	0.768	0.755	0.757	0.729	1.795	0.756	0.899	0.000	0.000	0.000	0.000	0.000	0.000	0.000	0.000	0.000	0.000	0.000	0.000	0.000	0.000	52	335	27620	23338	-0.381	Error	Error	11995	15625	0	0	10037	13301	0	0	0	0
3	9	9	"RAX1"	"YOR301W"	11940	27180	70	13718	13236	2252	114	132	60	100	100	0	4032	3992	603	75	89	52	100	100	0	0	0	0	0	0	0	0	0	0	0	0	0	0	0	0	0	0	0	3.438	3.350	3.423	3.341	1.225	3.363	0.833	0.000	0.000	0.000	0.000	0.000	0.000	0.000	0.000	0.000	0.000	0.000	0.000	0.000	0.000	32	236	17561	17039	1.782	Error	Error	13604	3957	0	0	13122	3917	0	0	0	0
3	10	9	""	"YOR239W"	12140	27180	70	7562	7170	2072	108	116	62	100	100	0	3470	3312	718	65	74	30	100	100	0	0	0	0	0	0	0	0	0	0	0	0	0	0	0	0	0	0	0	2.189	2.175	2.057	2.098	1.410	2.240	0.851	0.000	0.000	0.000	0.000	0.000	0.000	0.000	0.000	0.000	0.000	0.000	0.000	0.000	0.000	32	236	10859	10309	1.130	Error	Error	7454	3405	0	0	7062	3247	0	0	0	0
3	11	9	""	"YOR271C"	12340	27180	80	12073	9852	4284	117	130	68	100	100	0	3267	2697	1382	70	82	44	98	94	0	0	0	0	0	0	0	0	0	0	0	0	0	0	0	0	0	0	0	3.740	3.706	3.732	4.442	2.369	3.750	0.868	0.000	0.000	0.000	0.000	0.000	0.000	0.000	0.000	0.000	0.000	0.000	0.000	0.000	0.000	52	340	15153	12362	1.903	Error	Error	11956	3197	0	0	9735	2627	0	0	0	0
3	12	9	"CPA1"	"YOR303W"	12550	27180	80	10496	9286	4155	114	121	60	100	100	0	3190	2757	1005	73	82	36	100	100	0	0	0	0	0	0	0	0	0	0	0	0	0	0	0	0	0	0	0	3.331	3.417	3.462	3.375	1.884	3.747	0.874	0.000	0.000	0.000	0.000	0.000	0.000	0.000	0.000	0.000	0.000	0.000	0.000	0.000	0.000	52	340	13499	11856	1.736	Error	Error	10382	3117	0	0	9172	2684	0	0	0	0
3	13	9	""	"YPL222W"	12760	27180	70	5657	5843	3278	126	140	118	100	100	0	2880	2969	1408	80	89	39	100	100	0	0	0	0	0	0	0	0	0	0	0	0	0	0	0	0	0	0	0	1.975	1.979	1.805	1.903	1.802	2.523	0.662	0.000	0.000	0.000	0.000	0.000	0.000	0.000	0.000	0.000	0.000	0.000	0.000	0.000	0.000	32	236	8331	8606	0.982	Error	Error	5531	2800	0	0	5717	2889	0	0	0	0
3	14	9	"HFI1"	"YPL254W"	12950	27180	70	6461	6304	2492	124	129	56	100	100	0	10317	9817	2903	74	91	53	100	100	0	0	0	0	0	0	0	0	0	0	0	0	0	0	0	0	0	0	0	0.619	0.634	0.642	0.604	1.447	0.681	0.858	0.000	0.000	0.000	0.000	0.000	0.000	0.000	0.000	0.000	0.000	0.000	0.000	0.000	0.000	32	236	16580	15923	-0.693	Error	Error	6337	10243	0	0	6180	9743	0	0	0	0
3	15	9	""	"YPR003C"	13140	27180	60	6748	6493	2923	129	135	58	100	100	0	13143	13349	6864	85	102	58	100	100	0	0	0	0	0	0	0	0	0	0	0	0	0	0	0	0	0	0	0	0.507	0.480	0.474	0.561	2.248	0.430	0.837	0.000	0.000	0.000	0.000	0.000	0.000	0.000	0.000	0.000	0.000	0.000	0.000	0.000	0.000	32	176	19677	19628	-0.980	Error	Error	6619	13058	0	0	6364	13264	0	0	0	0
3	16	9	"MMT2"	"YPL224C"	13340	27180	70	12218	11451	2325	127	140	69	100	100	0	13805	13288	2606	91	107	67	100	100	0	0	0	0	0	0	0	0	0	0	0	0	0	0	0	0	0	0	0	0.882	0.858	0.837	0.855	1.302	0.817	0.853	0.000	0.000	0.000	0.000	0.000	0.000	0.000	0.000	0.000	0.000	0.000	0.000	0.000	0.000	32	236	25805	24521	-0.182	Error	Error	12091	13714	0	0	11324	13197	0	0	0	0
3	17	9	"CLN2"	"YPL256C"	13550	27170	70	10097	10378	4637	124	136	109	100	100	0	9317	9354	3998	84	114	304	100	96	0	0	0	0	0	0	0	0	0	0	0	0	0	0	0	0	0	0	0	1.080	1.106	1.065	1.168	1.913	1.142	0.852	0.000	0.000	0.000	0.000	0.000	0.000	0.000	0.000	0.000	0.000	0.000	0.000	0.000	0.000	32	236	19206	19524	0.111	Error	Error	9973	9233	0	0	10254	9270	0	0	0	0
3	18	9	"HAL1"	"YPR005C"	13740	27180	70	10621	9878	3141	121	130	62	100	100	0	9107	8461	2157	76	87	43	100	100	0	0	0	0	0	0	0	0	0	0	0	0	0	0	0	0	0	0	0	1.163	1.164	1.194	1.135	1.352	1.188	0.886	0.000	0.000	0.000	0.000	0.000	0.000	0.000	0.000	0.000	0.000	0.000	0.000	0.000	0.000	32	236	19531	18142	0.217	Error	Error	10500	9031	0	0	9757	8385	0	0	0	0
3	19	9	""	"YPL226W"	13940	27180	70	8819	8171	5253	117	129	62	100	100	0	5702	5849	3497	77	88	55	100	100	0	0	0	0	0	0	0	0	0	0	0	0	0	0	0	0	0	0	0	1.547	1.395	1.376	1.257	1.810	1.482	0.811	0.000	0.000	0.000	0.000	0.000	0.000	0.000	0.000	0.000	0.000	0.000	0.000	0.000	0.000	32	236	14327	13826	0.629	Error	Error	8702	5625	0	0	8054	5772	0	0	0	0
3	20	9	"THI21"	"YPL258C"	14140	27180	70	8410	8119	2722	112	123	57	100	100	0	5017	4673	1270	79	87	38	100	100	0	0	0	0	0	0	0	0	0	0	0	0	0	0	0	0	0	0	0	1.680	1.743	1.724	1.694	1.358	1.847	0.863	0.000	0.000	0.000	0.000	0.000	0.000	0.000	0.000	0.000	0.000	0.000	0.000	0.000	0.000	32	236	13236	12601	0.749	Error	Error	8298	4938	0	0	8007	4594	0	0	0	0
3	21	9	"SPO69"	"YPR007C"	14350	27170	80	7822	6712	2993	107	118	56	100	98	0	12350	10180	4737	75	85	42	100	98	0	0	0	0	0	0	0	0	0	0	0	0	0	0	0	0	0	0	0	0.629	0.654	0.676	0.740	2.427	0.632	0.885	0.000	0.000	0.000	0.000	0.000	0.000	0.000	0.000	0.000	0.000	0.000	0.000	0.000	0.000	52	332	19990	16710	-0.670	Error	Error	7715	12275	0	0	6605	10105	0	0	0	0
3	1	10	"CET1"	"YPL228W"	10350	27380	70	10028	9000	3214	111	120	58	100	100	0	14368	12690	4327	67	77	41	100	100	0	0	0	0	0	0	0	0	0	0	0	0	0	0	0	0	0	0	0	0.693	0.704	0.721	0.742	1.810	0.712	0.912	0.000	0.000	0.000	0.000	0.000	0.000	0.000	0.000	0.000	0.000	0.000	0.000	0.000	0.000	32	236	24218	21512	-0.528	Error	Error	9917	14301	0	0	8889	12623	0	0	0	0
3	2	10	""	"YPL260W"	10540	27380	70	9931	9468	2355	119	131	63	100	100	0	12554	11575	3302	86	102	54	100	100	0	0	0	0	0	0	0	0	0	0	0	0	0	0	0	0	0	0	0	0.787	0.814	0.798	0.846	1.669	0.767	0.863	0.000	0.000	0.000	0.000	0.000	0.000	0.000	0.000	0.000	0.000	0.000	0.000	0.000	0.000	32	236	22280	20838	-0.346	Error	Error	9812	12468	0	0	9349	11489	0	0	0	0
3	3	10	""	"YPR009W"	10750	27380	90	1955	1942	460	112	130	132	100	100	0	5244	4828	1569	73	125	420	98	98	0	0	0	0	0	0	0	0	0	0	0	0	0	0	0	0	0	0	0	0.356	0.385	0.354	0.426	2.105	0.358	0.875	0.000	0.000	0.000	0.000	0.000	0.000	0.000	0.000	0.000	0.000	0.000	0.000	0.000	0.000	52	399	7014	6585	-1.488	Error	Error	1843	5171	0	0	1830	4755	0	0	0	0
3	4	10	"LTE1"	"YAL024C"	10910	27360	90	2387	2271	764	127	160	178	98	96	0	5819	5303	2051	85	206	701	94	90	0	0	0	0	0	0	0	0	0	0	0	0	0	0	0	0	0	0	0	0.394	0.411	0.425	0.443	1.472	0.387	0.886	0.000	0.000	0.000	0.000	0.000	0.000	0.000	0.000	0.000	0.000	0.000	0.000	0.000	0.000	52	396	7994	7362	-1.343	Error	Error	2260	5734	0	0	2144	5218	0	0	0	0
3	5	10	"PEP1"	"YBL017C"	11160	27390	50	192	209	98	148	174	103	25	8	0	202	238	181	97	121	91	50	50	0	0	0	0	0	0	0	0	0	0	0	0	0	0	0	0	0	0	0	0.419	0.433	0.458	0.605	3.678	1.176	0.211	0.000	0.000	0.000	0.000	0.000	0.000	0.000	0.000	0.000	0.000	0.000	0.000	0.000	0.000	12	104	149	202	-1.255	Error	Error	44	105	0	0	61	141	0	0	0	0
3	6	10	"ENA2"	"YDR039C"	11370	27370	50	199	220	93	142	151	71	41	25	0	241	229	105	92	119	72	75	58	0	0	0	0	0	0	0	0	0	0	0	0	0	0	0	0	0	0	0	0.383	0.569	0.687	0.683	2.230	0.685	0.202	0.000	0.000	0.000	0.000	0.000	0.000	0.000	0.000	0.000	0.000	0.000	0.000	0.000	0.000	12	104	206	215	-1.386	Error	Error	57	149	0	0	78	137	0	0	0	0
3	7	10	""	"YFL019C"	11530	27370	150	137	152	78	126	136	62	25	8	0	96	123	88	82	95	54	26	12	0	0	0	0	0	0	0	0	0	0	0	0	0	0	0	0	0	0	0	0.786	0.634	1.484	1.350	4.037	1.265	0.055	0.000	0.000	0.000	0.000	0.000	0.000	0.000	0.000	0.000	0.000	0.000	0.000	0.000	0.000	156	901	25	67	-0.348	Error	Error	11	14	0	0	26	41	0	0	-50	0
3	8	10	""	"YGL066W"	11730	27370	150	139	152	74	121	130	61	25	9	0	94	118	95	78	93	57	23	10	0	0	0	0	0	0	0	0	0	0	0	0	0	0	0	0	0	0	0	1.125	0.775	1.235	1.301	4.695	0.817	0.033	0.000	0.000	0.000	0.000	0.000	0.000	0.000	0.000	0.000	0.000	0.000	0.000	0.000	0.000	156	929	34	71	0.170	Error	Error	18	16	0	0	31	40	0	0	-50	0
3	9	10	"MNT2"	"YGL257C"	11960	27380	60	176	190	91	123	130	56	40	28	0	124	160	128	73	88	54	46	21	0	0	0	0	0	0	0	0	0	0	0	0	0	0	0	0	0	0	0	1.039	0.770	0.937	1.112	4.098	0.548	0.177	0.000	0.000	0.000	0.000	0.000	0.000	0.000	0.000	0.000	0.000	0.000	0.000	0.000	0.000	32	176	104	154	0.055	Error	Error	53	51	0	0	67	87	0	0	0	0
3	10	10	""	"YHR032W"	12150	27390	60	145	155	69	121	127	58	37	9	0	111	125	72	67	76	30	53	34	0	0	0	0	0	0	0	0	0	0	0	0	0	0	0	0	0	0	0	0.545	0.586	1.331	1.333	3.159	0.697	0.112	0.000	0.000	0.000	0.000	0.000	0.000	0.000	0.000	0.000	0.000	0.000	0.000	0.000	0.000	32	176	68	92	-0.874	Error	Error	24	44	0	0	34	58	0	0	0	0
3	11	10	""	"YHR036W"	12350	27360	50	165	229	220	120	138	69	50	33	0	146	191	167	77	92	58	50	25	0	0	0	0	0	0	0	0	0	0	0	0	0	0	0	0	0	0	0	0.652	0.956	2.465	3.581	4.473	1.187	0.498	0.000	0.000	0.000	0.000	0.000	0.000	0.000	0.000	0.000	0.000	0.000	0.000	0.000	0.000	12	104	114	223	-0.617	Error	Error	45	69	0	0	109	114	0	0	0	0
3	12	10	""	"YHR045W"	12550	27360	60	172	154	72	113	126	66	40	9	0	81	124	116	73	87	52	31	15	0	0	0	0	0	0	0	0	0	0	0	0	0	0	0	0	0	0	0	7.375	0.804	1.567	1.795	3.407	0.515	0.110	0.000	0.000	0.000	0.000	0.000	0.000	0.000	0.000	0.000	0.000	0.000	0.000	0.000	0.000	32	176	67	92	2.883	Error	Error	59	8	0	0	41	51	0	0	0	0
3	13	10	"STT4"	"YLR305C"	12730	27370	150	121	132	66	123	143	160	5	0	0	81	106	74	79	90	48	22	12	0	0	0	0	0	0	0	0	0	0	0	0	0	0	0	0	0	0	0	-1.000	0.333	1.359	1.337	3.839	8.636	0.112	0.000	0.000	0.000	0.000	0.000	0.000	0.000	0.000	0.000	0.000	0.000	0.000	0.000	0.000	156	1031	0	36	Error	Error	Error	-2	2	0	0	9	27	0	0	-50	0
3	14	10	""	"YLR422W"	12950	27380	60	154	194	189	135	139	62	25	15	0	113	139	86	85	93	43	46	25	0	0	0	0	0	0	0	0	0	0	0	0	0	0	0	0	0	0	0	0.679	1.093	1.184	1.331	4.700	3.203	0.117	0.000	0.000	0.000	0.000	0.000	0.000	0.000	0.000	0.000	0.000	0.000	0.000	0.000	0.000	32	176	47	113	-0.559	Error	Error	19	28	0	0	59	54	0	0	0	0
3	15	10	""	"YML072C"	13150	27390	70	173	188	82	137	142	65	40	15	0	151	191	133	86	97	47	56	37	0	0	0	0	0	0	0	0	0	0	0	0	0	0	0	0	0	0	0	0.554	0.486	0.694	0.923	3.769	0.523	0.242	0.000	0.000	0.000	0.000	0.000	0.000	0.000	0.000	0.000	0.000	0.000	0.000	0.000	0.000	32	236	101	156	-0.852	Error	Error	36	65	0	0	51	105	0	0	0	0
3	16	10	""	"SNR54"	13340	27380	60	476	590	449	141	145	65	78	65	0	403	677	562	97	113	69	87	78	0	0	0	0	0	0	0	0	0	0	0	0	0	0	0	0	0	0	0	1.095	0.774	0.841	0.746	2.994	0.765	0.704	0.000	0.000	0.000	0.000	0.000	0.000	0.000	0.000	0.000	0.000	0.000	0.000	0.000	0.000	32	176	641	1029	0.131	Error	Error	335	306	0	0	449	580	0	0	0	0
3	17	10	""	"YMR046W-A"	13540	27380	80	1829	6708	10506	128	141	66	98	96	0	1677	5833	8807	83	98	52	100	94	0	0	0	0	0	0	0	0	0	0	0	0	0	0	0	0	0	0	0	1.067	1.144	1.089	1.148	2.664	1.202	0.822	0.000	0.000	0.000	0.000	0.000	0.000	0.000	0.000	0.000	0.000	0.000	0.000	0.000	0.000	52	340	3295	12330	0.094	Error	Error	1701	1594	0	0	6580	5750	0	0	0	0
3	18	10	""	"YMRWdelta16"	13740	27380	70	1425	1912	1380	115	128	59	96	96	0	583	965	754	76	84	34	96	96	0	0	0	0	0	0	0	0	0	0	0	0	0	0	0	0	0	0	0	2.584	2.021	2.081	2.039	1.743	2.020	0.859	0.000	0.000	0.000	0.000	0.000	0.000	0.000	0.000	0.000	0.000	0.000	0.000	0.000	0.000	32	236	1817	2686	1.370	Error	Error	1310	507	0	0	1797	889	0	0	0	0
3	19	10	""	"YNRCdelta9"	13940	27380	60	1090	1312	854	110	126	57	96	96	0	1428	1561	1038	72	88	69	100	100	0	0	0	0	0	0	0	0	0	0	0	0	0	0	0	0	0	0	0	0.723	0.807	0.803	0.759	1.979	0.780	0.833	0.000	0.000	0.000	0.000	0.000	0.000	0.000	0.000	0.000	0.000	0.000	0.000	0.000	0.000	32	176	2336	2691	-0.469	Error	Error	980	1356	0	0	1202	1489	0	0	0	0
3	20	10	""	"SNR50"	14140	27370	70	692	854	540	106	115	51	100	96	0	408	578	385	73	83	39	96	93	0	0	0	0	0	0	0	0	0	0	0	0	0	0	0	0	0	0	0	1.749	1.481	1.328	1.432	1.976	1.560	0.682	0.000	0.000	0.000	0.000	0.000	0.000	0.000	0.000	0.000	0.000	0.000	0.000	0.000	0.000	32	236	921	1253	0.807	Error	Error	586	335	0	0	748	505	0	0	0	0
3	21	10	""	"tR(ACG)O"	14340	27370	70	480	481	179	108	117	56	100	93	0	405	429	198	74	86	42	93	90	0	0	0	0	0	0	0	0	0	0	0	0	0	0	0	0	0	0	0	1.124	1.051	1.084	1.076	1.869	1.022	0.668	0.000	0.000	0.000	0.000	0.000	0.000	0.000	0.000	0.000	0.000	0.000	0.000	0.000	0.000	32	236	703	728	0.168	Error	Error	372	331	0	0	373	355	0	0	0	0
3	1	11	""	"YPLCdelta1"	10340	27580	80	1091	1302	708	108	116	59	100	98	0	452	572	355	63	70	30	96	94	0	0	0	0	0	0	0	0	0	0	0	0	0	0	0	0	0	0	0	2.527	2.346	2.541	2.444	2.193	2.400	0.809	0.000	0.000	0.000	0.000	0.000	0.000	0.000	0.000	0.000	0.000	0.000	0.000	0.000	0.000	52	340	1372	1703	1.337	Error	Error	983	389	0	0	1194	509	0	0	0	0
3	2	11	""	"YPL183W-A"	10540	27590	100	1563	1458	569	114	122	58	100	98	0	863	793	264	72	86	48	96	96	0	0	0	0	0	0	0	0	0	0	0	0	0	0	0	0	0	0	0	1.832	1.864	1.855	1.896	2.162	2.054	0.820	0.000	0.000	0.000	0.000	0.000	0.000	0.000	0.000	0.000	0.000	0.000	0.000	0.000	0.000	80	536	2240	2065	0.873	Error	Error	1449	791	0	0	1344	721	0	0	0	0
3	3	11	""	"IntYPL143W"	10740	27580	80	2330	2700	1866	116	119	55	100	100	0	2240	2499	1727	73	86	47	100	98	0	0	0	0	0	0	0	0	0	0	0	0	0	0	0	0	0	0	0	1.022	1.065	1.103	1.107	1.928	1.081	0.876	0.000	0.000	0.000	0.000	0.000	0.000	0.000	0.000	0.000	0.000	0.000	0.000	0.000	0.000	52	340	4381	5010	0.031	Error	Error	2214	2167	0	0	2584	2426	0	0	0	0
3	4	11	""	"tC(GCA)P2"	10930	27580	70	786	712	225	121	133	67	100	96	0	889	850	378	79	92	48	100	100	0	0	0	0	0	0	0	0	0	0	0	0	0	0	0	0	0	0	0	0.821	0.767	0.761	0.823	1.629	0.681	0.772	0.000	0.000	0.000	0.000	0.000	0.000	0.000	0.000	0.000	0.000	0.000	0.000	0.000	0.000	32	236	1475	1362	-0.285	Error	Error	665	810	0	0	591	771	0	0	0	0
3	5	11	""	"tN(GUU)P"	11140	27580	90	8778	18069	20076	152	170	101	100	100	5	5551	8379	9159	86	113	128	94	90	0	0	0	0	0	0	0	0	0	0	0	0	0	0	0	0	0	0	0	1.578	2.160	2.100	2.323	2.872	2.345	0.808	0.000	0.000	0.000	0.000	0.000	0.000	0.000	0.000	0.000	0.000	0.000	0.000	0.000	0.000	52	420	14091	26210	0.658	Error	Error	8626	5465	0	0	17917	8293	0	0	0	0
3	6	11	""	"tI(AAU)P2"	11350	27580	80	2925	2729	1568	132	141	63	100	96	0	2335	2331	1194	83	96	47	100	100	0	0	0	0	0	0	0	0	0	0	0	0	0	0	0	0	0	0	0	1.240	1.155	1.154	1.001	2.043	1.218	0.866	0.000	0.000	0.000	0.000	0.000	0.000	0.000	0.000	0.000	0.000	0.000	0.000	0.000	0.000	52	340	5045	4845	0.311	Error	Error	2793	2252	0	0	2597	2248	0	0	0	0
3	7	11	""	"itL(UAA)B2"	11550	27580	80	608	626	270	125	130	55	94	90	0	520	491	209	82	94	51	98	96	0	0	0	0	0	0	0	0	0	0	0	0	0	0	0	0	0	0	0	1.103	1.225	1.305	1.202	1.869	1.301	0.812	0.000	0.000	0.000	0.000	0.000	0.000	0.000	0.000	0.000	0.000	0.000	0.000	0.000	0.000	52	340	921	910	0.141	Error	Error	483	438	0	0	501	409	0	0	0	0
3	8	11	""	"iYBR057C"	11740	27580	90	5764	7688	6298	122	131	62	100	100	0	4453	5601	4540	80	91	42	100	100	0	0	0	0	0	0	0	0	0	0	0	0	0	0	0	0	0	0	0	1.290	1.370	1.406	1.543	2.332	1.400	0.884	0.000	0.000	0.000	0.000	0.000	0.000	0.000	0.000	0.000	0.000	0.000	0.000	0.000	0.000	52	414	10015	13087	0.368	Error	Error	5642	4373	0	0	7566	5521	0	0	0	0
3	9	11	""	"iYBR060C-1"	11960	27590	70	231	230	108	127	138	71	59	31	0	227	242	145	87	98	53	75	62	0	0	0	0	0	0	0	0	0	0	0	0	0	0	0	0	0	0	0	0.743	0.665	0.881	0.785	2.552	0.649	0.226	0.000	0.000	0.000	0.000	0.000	0.000	0.000	0.000	0.000	0.000	0.000	0.000	0.000	0.000	32	236	244	258	-0.429	Error	Error	104	140	0	0	103	155	0	0	0	0
3	10	11	""	"iYBR077C"	12140	27580	80	1441	2147	2051	117	129	74	98	94	0	701	1044	913	74	81	46	100	92	0	0	0	0	0	0	0	0	0	0	0	0	0	0	0	0	0	0	0	2.112	2.093	2.019	1.936	2.194	2.294	0.854	0.000	0.000	0.000	0.000	0.000	0.000	0.000	0.000	0.000	0.000	0.000	0.000	0.000	0.000	52	340	1951	3000	1.078	Error	Error	1324	627	0	0	2030	970	0	0	0	0
3	11	11	""	"iYBR081C"	12340	27580	70	1513	2409	2325	114	121	60	100	96	0	579	880	737	75	84	37	100	96	0	0	0	0	0	0	0	0	0	0	0	0	0	0	0	0	0	0	0	2.776	2.851	2.785	2.546	1.916	3.238	0.838	0.000	0.000	0.000	0.000	0.000	0.000	0.000	0.000	0.000	0.000	0.000	0.000	0.000	0.000	32	236	1903	3100	1.473	Error	Error	1399	504	0	0	2295	805	0	0	0	0
3	12	11	""	"iYBR083W"	12540	27580	60	6052	6230	3810	111	125	62	100	100	0	2587	2741	1709	74	84	40	100	100	0	0	0	0	0	0	0	0	0	0	0	0	0	0	0	0	0	0	0	2.364	2.294	2.153	2.426	1.584	2.326	0.882	0.000	0.000	0.000	0.000	0.000	0.000	0.000	0.000	0.000	0.000	0.000	0.000	0.000	0.000	32	176	8454	8786	1.241	Error	Error	5941	2513	0	0	6119	2667	0	0	0	0
3	13	11	""	"iYBR097W"	12750	27580	70	922	927	554	119	127	60	93	87	0	1018	1084	544	78	87	38	100	96	0	0	0	0	0	0	0	0	0	0	0	0	0	0	0	0	0	0	0	0.854	0.803	0.897	0.777	1.783	0.855	0.831	0.000	0.000	0.000	0.000	0.000	0.000	0.000	0.000	0.000	0.000	0.000	0.000	0.000	0.000	32	236	1743	1814	-0.227	Error	Error	803	940	0	0	808	1006	0	0	0	0
3	14	11	""	"iYBR103W"	12950	27580	80	1444	2009	1549	125	139	72	100	94	0	1308	1591	1140	80	88	40	98	94	0	0	0	0	0	0	0	0	0	0	0	0	0	0	0	0	0	0	0	1.074	1.247	1.217	1.204	2.231	1.318	0.888	0.000	0.000	0.000	0.000	0.000	0.000	0.000	0.000	0.000	0.000	0.000	0.000	0.000	0.000	52	340	2547	3395	0.103	Error	Error	1319	1228	0	0	1884	1511	0	0	0	0
3	15	11	""	"iYBR107C"	13150	27570	70	4364	4212	2018	133	144	87	100	100	0	1770	1626	829	89	105	62	96	96	0	0	0	0	0	0	0	0	0	0	0	0	0	0	0	0	0	0	0	2.517	2.654	2.655	2.844	2.060	2.687	0.854	0.000	0.000	0.000	0.000	0.000	0.000	0.000	0.000	0.000	0.000	0.000	0.000	0.000	0.000	32	236	5912	5616	1.332	Error	Error	4231	1681	0	0	4079	1537	0	0	0	0
3	16	11	""	"iYBR126C"	13360	27580	80	708	1463	1805	144	156	76	92	88	0	617	1542	1852	101	120	70	98	92	0	0	0	0	0	0	0	0	0	0	0	0	0	0	0	0	0	0	0	1.093	0.915	0.759	0.851	2.156	0.950	0.749	0.000	0.000	0.000	0.000	0.000	0.000	0.000	0.000	0.000	0.000	0.000	0.000	0.000	0.000	52	340	1080	2760	0.128	Error	Error	564	516	0	0	1319	1441	0	0	0	0
3	17	11	""	"iYBR130C"	13550	27580	70	4001	3562	1597	124	134	57	100	100	0	1964	1748	724	86	95	46	100	100	0	0	0	0	0	0	0	0	0	0	0	0	0	0	0	0	0	0	0	2.064	2.069	2.112	1.954	1.827	2.163	0.860	0.000	0.000	0.000	0.000	0.000	0.000	0.000	0.000	0.000	0.000	0.000	0.000	0.000	0.000	32	236	5755	5100	1.046	Error	Error	3877	1878	0	0	3438	1662	0	0	0	0
3	18	11	""	"iYBR135W"	13750	27580	80	1945	3268	2986	122	131	64	100	98	0	1005	1503	1298	78	85	39	92	92	0	0	0	0	0	0	0	0	0	0	0	0	0	0	0	0	0	0	0	1.967	2.208	2.012	2.103	1.921	2.352	0.886	0.000	0.000	0.000	0.000	0.000	0.000	0.000	0.000	0.000	0.000	0.000	0.000	0.000	0.000	52	340	2750	4571	0.976	Error	Error	1823	927	0	0	3146	1425	0	0	0	0
3	19	11	""	"iYDL248W-0"	13950	27570	70	1783	2883	2758	111	119	54	100	100	0	1647	3633	3595	71	83	57	93	93	0	0	0	0	0	0	0	0	0	0	0	0	0	0	0	0	0	0	0	1.061	0.778	0.805	0.949	2.710	0.752	0.881	0.000	0.000	0.000	0.000	0.000	0.000	0.000	0.000	0.000	0.000	0.000	0.000	0.000	0.000	32	236	3248	6334	0.085	Error	Error	1672	1576	0	0	2772	3562	0	0	0	0
3	20	11	""	"iYDL246C-1"	14150	27580	70	5761	6285	3889	112	122	57	100	100	0	4994	4466	2853	74	81	32	100	100	0	0	0	0	0	0	0	0	0	0	0	0	0	0	0	0	0	0	0	1.148	1.406	1.399	1.441	1.693	1.408	0.909	0.000	0.000	0.000	0.000	0.000	0.000	0.000	0.000	0.000	0.000	0.000	0.000	0.000	0.000	32	236	10569	10565	0.199	Error	Error	5649	4920	0	0	6173	4392	0	0	0	0
3	21	11	""	"iYDL243C"	14350	27580	80	2628	3323	2654	112	117	50	100	100	0	2021	2468	1848	73	79	31	96	96	0	0	0	0	0	0	0	0	0	0	0	0	0	0	0	0	0	0	0	1.292	1.341	1.384	1.374	2.834	1.411	0.896	0.000	0.000	0.000	0.000	0.000	0.000	0.000	0.000	0.000	0.000	0.000	0.000	0.000	0.000	52	340	4464	5606	0.369	Error	Error	2516	1948	0	0	3211	2395	0	0	0	0
3	1	12	""	"iYDL227C-0"	10350	27780	80	1172	2625	2864	104	109	48	100	98	0	1363	3429	3798	65	72	32	98	98	0	0	0	0	0	0	0	0	0	0	0	0	0	0	0	0	0	0	0	0.823	0.749	0.725	0.678	2.088	0.741	0.892	0.000	0.000	0.000	0.000	0.000	0.000	0.000	0.000	0.000	0.000	0.000	0.000	0.000	0.000	52	340	2366	5885	-0.281	Error	Error	1068	1298	0	0	2521	3364	0	0	0	0
3	2	12	""	"iYDL225W"	10560	27780	80	1217	2023	1871	106	111	53	100	96	0	3478	5786	5525	63	72	33	100	100	0	0	0	0	0	0	0	0	0	0	0	0	0	0	0	0	0	0	0	0.325	0.335	0.363	0.321	2.043	0.322	0.901	0.000	0.000	0.000	0.000	0.000	0.000	0.000	0.000	0.000	0.000	0.000	0.000	0.000	0.000	52	340	4526	7640	-1.620	Error	Error	1111	3415	0	0	1917	5723	0	0	0	0
3	3	12	""	"iYDL220C"	10750	27780	80	1240	1546	1059	102	112	55	98	98	0	1275	1503	930	64	71	30	100	100	0	0	0	0	0	0	0	0	0	0	0	0	0	0	0	0	0	0	0	0.940	1.003	1.075	0.883	1.994	1.056	0.882	0.000	0.000	0.000	0.000	0.000	0.000	0.000	0.000	0.000	0.000	0.000	0.000	0.000	0.000	52	340	2349	2883	-0.090	Error	Error	1138	1211	0	0	1444	1439	0	0	0	0
3	4	12	""	"iYDL207W"	10950	27780	80	2157	1926	795	115	117	52	100	100	0	1813	1717	552	69	76	34	100	100	0	0	0	0	0	0	0	0	0	0	0	0	0	0	0	0	0	0	0	1.171	1.099	1.125	1.005	1.713	1.167	0.837	0.000	0.000	0.000	0.000	0.000	0.000	0.000	0.000	0.000	0.000	0.000	0.000	0.000	0.000	52	340	3786	3459	0.228	Error	Error	2042	1744	0	0	1811	1648	0	0	0	0
3	5	12	""	"iYDL203C"	11160	27780	90	1514	2653	2187	115	126	63	98	98	0	990	1698	1237	69	78	40	100	100	0	0	0	0	0	0	0	0	0	0	0	0	0	0	0	0	0	0	0	1.519	1.558	1.458	1.319	1.693	1.692	0.897	0.000	0.000	0.000	0.000	0.000	0.000	0.000	0.000	0.000	0.000	0.000	0.000	0.000	0.000	52	420	2320	4167	0.603	Error	Error	1399	921	0	0	2538	1629	0	0	0	0
3	6	12	""	"iYDL199C"	11350	27790	80	1358	1695	1201	115	124	58	100	100	0	828	1023	669	69	80	42	98	98	0	0	0	0	0	0	0	0	0	0	0	0	0	0	0	0	0	0	0	1.638	1.656	1.647	1.501	1.792	1.789	0.867	0.000	0.000	0.000	0.000	0.000	0.000	0.000	0.000	0.000	0.000	0.000	0.000	0.000	0.000	52	340	2002	2534	0.712	Error	Error	1243	759	0	0	1580	954	0	0	0	0
3	7	12	""	"iYDL183C-1"	11550	27780	80	3897	4845	3305	118	126	56	100	100	0	2003	2074	1343	70	83	49	98	98	0	0	0	0	0	0	0	0	0	0	0	0	0	0	0	0	0	0	0	1.955	2.359	2.478	2.541	1.961	2.476	0.910	0.000	0.000	0.000	0.000	0.000	0.000	0.000	0.000	0.000	0.000	0.000	0.000	0.000	0.000	52	340	5712	6731	0.967	Error	Error	3779	1933	0	0	4727	2004	0	0	0	0
3	8	12	""	"iYDL179W"	11760	27790	80	1887	2432	1737	119	132	70	100	100	0	1270	1705	1127	73	84	47	100	100	0	0	0	0	0	0	0	0	0	0	0	0	0	0	0	0	0	0	0	1.477	1.417	1.310	1.290	1.614	1.501	0.877	0.000	0.000	0.000	0.000	0.000	0.000	0.000	0.000	0.000	0.000	0.000	0.000	0.000	0.000	52	340	2965	3945	0.563	Error	Error	1768	1197	0	0	2313	1632	0	0	0	0
3	9	12	""	"iYDL175C"	11960	27780	80	1469	2719	2778	120	132	65	98	98	0	2026	3523	3525	78	94	61	100	100	0	0	0	0	0	0	0	0	0	0	0	0	0	0	0	0	0	0	0	0.693	0.754	0.643	0.688	1.894	0.763	0.901	0.000	0.000	0.000	0.000	0.000	0.000	0.000	0.000	0.000	0.000	0.000	0.000	0.000	0.000	52	340	3297	6044	-0.530	Error	Error	1349	1948	0	0	2599	3445	0	0	0	0
3	10	12	""	"iYDR127W"	12150	27780	70	1297	1860	1539	115	122	61	100	93	0	718	1202	993	75	83	38	100	100	0	0	0	0	0	0	0	0	0	0	0	0	0	0	0	0	0	0	0	1.838	1.548	1.517	1.410	1.914	1.593	0.885	0.000	0.000	0.000	0.000	0.000	0.000	0.000	0.000	0.000	0.000	0.000	0.000	0.000	0.000	32	236	1825	2872	0.878	Error	Error	1182	643	0	0	1745	1127	0	0	0	0
3	11	12	""	"iYDR131C"	12350	27780	80	1502	2111	1620	117	129	81	100	98	0	869	1129	833	69	79	39	96	96	0	0	0	0	0	0	0	0	0	0	0	0	0	0	0	0	0	0	0	1.731	1.881	1.820	1.757	1.830	1.988	0.887	0.000	0.000	0.000	0.000	0.000	0.000	0.000	0.000	0.000	0.000	0.000	0.000	0.000	0.000	52	340	2185	3054	0.792	Error	Error	1385	800	0	0	1994	1060	0	0	0	0
3	12	12	""	"iYDR137W"	12550	27770	70	1514	1968	1467	113	122	60	93	93	0	837	1119	831	69	80	37	96	96	0	0	0	0	0	0	0	0	0	0	0	0	0	0	0	0	0	0	0	1.824	1.767	1.651	1.570	2.125	1.848	0.844	0.000	0.000	0.000	0.000	0.000	0.000	0.000	0.000	0.000	0.000	0.000	0.000	0.000	0.000	32	236	2169	2905	0.867	Error	Error	1401	768	0	0	1855	1050	0	0	0	0
3	13	12	""	"iYDR155C"	12750	27780	80	1068	1587	1219	108	115	51	100	100	0	475	537	343	71	82	41	90	90	0	0	0	0	0	0	0	0	0	0	0	0	0	0	0	0	0	0	0	2.376	3.174	3.102	3.261	2.351	3.635	0.826	0.000	0.000	0.000	0.000	0.000	0.000	0.000	0.000	0.000	0.000	0.000	0.000	0.000	0.000	52	340	1364	1945	1.249	Error	Error	960	404	0	0	1479	466	0	0	0	0
3	14	12	""	"iYDR161W"	12960	27780	80	1763	2169	1596	125	134	74	100	94	0	5785	5699	3141	76	87	39	100	100	0	0	0	0	0	0	0	0	0	0	0	0	0	0	0	0	0	0	0	0.287	0.364	0.346	0.305	1.951	0.385	0.840	0.000	0.000	0.000	0.000	0.000	0.000	0.000	0.000	0.000	0.000	0.000	0.000	0.000	0.000	52	340	7347	7667	-1.801	Error	Error	1638	5709	0	0	2044	5623	0	0	0	0
3	15	12	""	"iYDR165W"	13150	27780	70	1010	1155	776	125	145	169	81	75	0	1295	1312	876	80	93	43	100	100	0	0	0	0	0	0	0	0	0	0	0	0	0	0	0	0	0	0	0	0.728	0.836	0.731	0.782	2.044	0.866	0.727	0.000	0.000	0.000	0.000	0.000	0.000	0.000	0.000	0.000	0.000	0.000	0.000	0.000	0.000	32	236	2100	2262	-0.457	Error	Error	885	1215	0	0	1030	1232	0	0	0	0
3	16	12	""	"iYDR177W"	13350	27780	70	4410	5935	4490	139	146	61	100	100	0	2016	2664	2118	93	112	64	100	96	0	0	0	0	0	0	0	0	0	0	0	0	0	0	0	0	0	0	0	2.221	2.254	2.431	2.602	1.875	2.297	0.882	0.000	0.000	0.000	0.000	0.000	0.000	0.000	0.000	0.000	0.000	0.000	0.000	0.000	0.000	32	236	6194	8367	1.151	Error	Error	4271	1923	0	0	5796	2571	0	0	0	0
3	17	12	""	"iYDR180W"	13560	27780	60	939	1840	1755	131	137	66	96	90	0	1645	3536	3429	77	92	49	100	100	0	0	0	0	0	0	0	0	0	0	0	0	0	0	0	0	0	0	0	0.515	0.494	0.414	0.463	2.238	0.483	0.862	0.000	0.000	0.000	0.000	0.000	0.000	0.000	0.000	0.000	0.000	0.000	0.000	0.000	0.000	32	176	2376	5168	-0.956	Error	Error	808	1568	0	0	1709	3459	0	0	0	0
3	18	12	""	"iYDR184C"	13750	27780	80	1116	2350	2559	119	128	61	96	92	0	1290	2005	2072	74	85	41	94	88	0	0	0	0	0	0	0	0	0	0	0	0	0	0	0	0	0	0	0	0.820	1.155	1.169	1.055	2.976	1.223	0.878	0.000	0.000	0.000	0.000	0.000	0.000	0.000	0.000	0.000	0.000	0.000	0.000	0.000	0.000	52	340	2213	4162	-0.286	Error	Error	997	1216	0	0	2231	1931	0	0	0	0
3	19	12	""	"iYDR204W"	13950	27780	80	1428	2241	1949	115	128	78	98	92	0	596	917	785	74	92	122	84	71	0	0	0	0	0	0	0	0	0	0	0	0	0	0	0	0	0	0	0	2.515	2.522	2.396	2.688	2.371	2.620	0.894	0.000	0.000	0.000	0.000	0.000	0.000	0.000	0.000	0.000	0.000	0.000	0.000	0.000	0.000	52	340	1835	2969	1.331	Error	Error	1313	522	0	0	2126	843	0	0	0	0
3	20	12	""	"iYDR208W"	14160	27780	80	860	1773	1832	105	117	59	96	94	0	697	1385	1287	72	82	42	100	98	0	0	0	0	0	0	0	0	0	0	0	0	0	0	0	0	0	0	0	1.208	1.270	1.103	1.103	1.895	1.379	0.905	0.000	0.000	0.000	0.000	0.000	0.000	0.000	0.000	0.000	0.000	0.000	0.000	0.000	0.000	52	340	1380	2981	0.273	Error	Error	755	625	0	0	1668	1313	0	0	0	0
3	21	12	""	"itI(UAU)D"	14360	27780	80	916	1538	1495	106	118	61	96	82	0	579	1025	931	70	82	40	100	100	0	0	0	0	0	0	0	0	0	0	0	0	0	0	0	0	0	0	0	1.591	1.499	1.411	1.148	2.088	1.595	0.919	0.000	0.000	0.000	0.000	0.000	0.000	0.000	0.000	0.000	0.000	0.000	0.000	0.000	0.000	52	332	1319	2387	0.670	Error	Error	810	509	0	0	1432	955	0	0	0	0
3	1	13	""	"iYDR521W"	10350	27980	90	1982	1924	937	99	109	71	100	96	0	1725	1664	771	63	78	127	98	96	0	0	0	0	0	0	0	0	0	0	0	0	0	0	0	0	0	0	0	1.133	1.140	1.152	1.110	2.121	1.184	0.790	0.000	0.000	0.000	0.000	0.000	0.000	0.000	0.000	0.000	0.000	0.000	0.000	0.000	0.000	52	420	3545	3426	0.180	Error	Error	1883	1662	0	0	1825	1601	0	0	0	0
3	2	13	""	"iYDR525W"	10540	27980	70	1103	1079	279	104	110	62	100	100	0	406	401	143	67	74	29	96	96	0	0	0	0	0	0	0	0	0	0	0	0	0	0	0	0	0	0	0	2.947	2.919	2.977	3.257	2.002	3.040	0.796	0.000	0.000	0.000	0.000	0.000	0.000	0.000	0.000	0.000	0.000	0.000	0.000	0.000	0.000	32	236	1338	1309	1.559	Error	Error	999	339	0	0	975	334	0	0	0	0
3	3	13	""	"iYDR528W"	10750	27980	80	1200	1292	800	104	112	56	96	90	0	1663	1795	1043	65	72	32	100	100	0	0	0	0	0	0	0	0	0	0	0	0	0	0	0	0	0	0	0	0.686	0.687	0.685	0.595	2.195	0.698	0.866	0.000	0.000	0.000	0.000	0.000	0.000	0.000	0.000	0.000	0.000	0.000	0.000	0.000	0.000	52	340	2694	2918	-0.544	Error	Error	1096	1598	0	0	1188	1730	0	0	0	0
3	4	13	""	"iYDR541C-0"	10940	27990	70	3780	4377	2405	98	110	79	100	100	0	2698	3199	1699	67	73	31	100	100	0	0	0	0	0	0	0	0	0	0	0	0	0	0	0	0	0	0	0	1.399	1.366	1.425	1.316	1.520	1.394	0.916	0.000	0.000	0.000	0.000	0.000	0.000	0.000	0.000	0.000	0.000	0.000	0.000	0.000	0.000	32	236	6313	7411	0.485	Error	Error	3682	2631	0	0	4279	3132	0	0	0	0
3	5	13	""	"iYDR544C"	11150	27980	90	35214	32888	11413	107	119	57	100	100	0	14045	12605	5006	67	77	36	100	100	0	0	0	0	0	0	0	0	0	0	0	0	0	0	0	0	0	0	0	2.512	2.615	2.632	3.029	2.232	2.615	0.873	0.000	0.000	0.000	0.000	0.000	0.000	0.000	0.000	0.000	0.000	0.000	0.000	0.000	0.000	52	420	49085	45319	1.329	Error	Error	35107	13978	0	0	32781	12538	0	0	0	0
3	6	13	""	"iYEL073C-0"	11350	27980	90	4179	4152	1246	108	115	52	100	100	0	3225	2842	964	67	77	42	98	98	0	0	0	0	0	0	0	0	0	0	0	0	0	0	0	0	0	0	0	1.289	1.457	1.393	1.468	1.509	1.431	0.870	0.000	0.000	0.000	0.000	0.000	0.000	0.000	0.000	0.000	0.000	0.000	0.000	0.000	0.000	52	420	7229	6819	0.366	Error	Error	4071	3158	0	0	4044	2775	0	0	0	0
3	7	13	""	"iYEL063C"	11550	27980	80	4022	3789	1422	115	121	53	100	100	0	2090	2071	887	68	75	31	100	100	0	0	0	0	0	0	0	0	0	0	0	0	0	0	0	0	0	0	0	1.932	1.834	1.743	1.957	1.756	1.871	0.844	0.000	0.000	0.000	0.000	0.000	0.000	0.000	0.000	0.000	0.000	0.000	0.000	0.000	0.000	52	340	5929	5677	0.950	Error	Error	3907	2022	0	0	3674	2003	0	0	0	0
3	8	13	""	"iYEL059W"	11740	27980	80	2640	2379	1274	110	125	61	98	96	0	933	943	590	70	77	33	82	82	0	0	0	0	0	0	0	0	0	0	0	0	0	0	0	0	0	0	0	2.932	2.599	2.353	2.774	2.243	2.592	0.837	0.000	0.000	0.000	0.000	0.000	0.000	0.000	0.000	0.000	0.000	0.000	0.000	0.000	0.000	52	340	3393	3142	1.552	Error	Error	2530	863	0	0	2269	873	0	0	0	0
3	9	13	""	"iYEL055C"	11950	27980	80	3513	3463	1225	111	118	53	100	100	0	2624	2224	1035	72	78	35	98	96	0	0	0	0	0	0	0	0	0	0	0	0	0	0	0	0	0	0	0	1.333	1.558	1.602	1.969	2.591	1.516	0.815	0.000	0.000	0.000	0.000	0.000	0.000	0.000	0.000	0.000	0.000	0.000	0.000	0.000	0.000	52	340	5954	5504	0.415	Error	Error	3402	2552	0	0	3352	2152	0	0	0	0
3	10	13	""	"iYEL042W"	12150	27980	80	4565	4451	1494	111	119	66	100	98	0	2554	2115	937	65	74	37	100	100	0	0	0	0	0	0	0	0	0	0	0	0	0	0	0	0	0	0	0	1.789	2.117	1.973	2.418	2.291	2.129	0.815	0.000	0.000	0.000	0.000	0.000	0.000	0.000	0.000	0.000	0.000	0.000	0.000	0.000	0.000	52	340	6943	6390	0.840	Error	Error	4454	2489	0	0	4340	2050	0	0	0	0
3	11	13	""	"iYEL038W"	12350	27980	80	460	450	229	105	115	75	84	80	0	650	607	320	65	73	34	88	88	0	0	0	0	0	0	0	0	0	0	0	0	0	0	0	0	0	0	0	0.607	0.637	0.628	0.652	2.290	0.642	0.773	0.000	0.000	0.000	0.000	0.000	0.000	0.000	0.000	0.000	0.000	0.000	0.000	0.000	0.000	52	340	940	887	-0.721	Error	Error	355	585	0	0	345	542	0	0	0	0
3	12	13	""	"itS(AGA)E"	12560	27980	80	1985	1920	969	105	113	54	100	98	0	727	743	366	69	78	37	98	96	0	0	0	0	0	0	0	0	0	0	0	0	0	0	0	0	0	0	0	2.857	2.693	2.549	2.852	2.228	3.009	0.744	0.000	0.000	0.000	0.000	0.000	0.000	0.000	0.000	0.000	0.000	0.000	0.000	0.000	0.000	52	340	2538	2489	1.515	Error	Error	1880	658	0	0	1815	674	0	0	0	0
3	13	13	""	"iYFL044C"	12740	27970	80	907	903	319	111	117	55	100	100	0	676	646	276	71	80	40	94	90	0	0	0	0	0	0	0	0	0	0	0	0	0	0	0	0	0	0	0	1.316	1.377	1.356	1.316	1.837	1.428	0.712	0.000	0.000	0.000	0.000	0.000	0.000	0.000	0.000	0.000	0.000	0.000	0.000	0.000	0.000	52	340	1401	1367	0.396	Error	Error	796	605	0	0	792	575	0	0	0	0
3	14	13	""	"iYFL039C"	12940	27970	80	4819	4900	2716	124	141	85	100	100	0	1335	1399	704	82	94	77	98	98	0	0	0	0	0	0	0	0	0	0	0	0	0	0	0	0	0	0	0	3.747	3.626	3.586	3.454	1.986	3.952	0.851	0.000	0.000	0.000	0.000	0.000	0.000	0.000	0.000	0.000	0.000	0.000	0.000	0.000	0.000	52	340	5948	6093	1.906	Error	Error	4695	1253	0	0	4776	1317	0	0	0	0
3	15	13	""	"iYFL035C-A"	13140	27970	80	1533	1554	749	133	147	75	100	100	0	1546	1400	736	84	94	47	90	88	0	0	0	0	0	0	0	0	0	0	0	0	0	0	0	0	0	0	0	0.958	1.080	1.048	1.187	2.467	1.071	0.856	0.000	0.000	0.000	0.000	0.000	0.000	0.000	0.000	0.000	0.000	0.000	0.000	0.000	0.000	52	340	2862	2737	-0.063	Error	Error	1400	1462	0	0	1421	1316	0	0	0	0
3	16	13	""	"iYFL020C"	13340	27980	80	4368	4505	3034	129	140	63	100	100	0	4993	5951	3553	95	110	62	100	100	0	0	0	0	0	0	0	0	0	0	0	0	0	0	0	0	0	0	0	0.865	0.747	0.733	0.660	1.798	0.770	0.882	0.000	0.000	0.000	0.000	0.000	0.000	0.000	0.000	0.000	0.000	0.000	0.000	0.000	0.000	52	340	9137	10232	-0.208	Error	Error	4239	4898	0	0	4376	5856	0	0	0	0
3	17	13	""	"iYFL017C"	13540	27980	80	807	1029	790	120	130	60	92	86	0	640	818	634	79	91	45	100	94	0	0	0	0	0	0	0	0	0	0	0	0	0	0	0	0	0	0	0	1.225	1.230	1.153	1.129	2.208	1.255	0.879	0.000	0.000	0.000	0.000	0.000	0.000	0.000	0.000	0.000	0.000	0.000	0.000	0.000	0.000	52	340	1248	1648	0.292	Error	Error	687	561	0	0	909	739	0	0	0	0
3	18	13	""	"iYFL013W-A"	13740	27970	80	2761	2856	944	123	130	60	100	100	0	1847	1714	603	76	89	51	100	100	0	0	0	0	0	0	0	0	0	0	0	0	0	0	0	0	0	0	0	1.490	1.668	1.743	1.758	1.710	1.741	0.848	0.000	0.000	0.000	0.000	0.000	0.000	0.000	0.000	0.000	0.000	0.000	0.000	0.000	0.000	52	340	4409	4371	0.575	Error	Error	2638	1771	0	0	2733	1638	0	0	0	0
3	19	13	""	"iYFR001W"	13940	27970	70	2082	2060	953	108	119	69	100	100	0	7629	7084	4027	72	79	36	100	100	0	0	0	0	0	0	0	0	0	0	0	0	0	0	0	0	0	0	0	0.261	0.278	0.280	0.300	1.518	0.246	0.881	0.000	0.000	0.000	0.000	0.000	0.000	0.000	0.000	0.000	0.000	0.000	0.000	0.000	0.000	32	236	9531	8964	-1.937	Error	Error	1974	7557	0	0	1952	7012	0	0	0	0
3	20	13	""	"iYFR005C"	14140	27970	70	1881	1819	408	108	116	51	100	100	0	6049	5609	1439	74	90	92	100	100	0	0	0	0	0	0	0	0	0	0	0	0	0	0	0	0	0	0	0	0.297	0.309	0.314	0.308	1.303	0.268	0.846	0.000	0.000	0.000	0.000	0.000	0.000	0.000	0.000	0.000	0.000	0.000	0.000	0.000	0.000	32	236	7748	7246	-1.753	Error	Error	1773	5975	0	0	1711	5535	0	0	0	0
3	21	13	""	"iYFR007W"	14340	27970	70	1669	1609	462	109	119	61	100	100	0	2725	2556	810	74	97	151	100	100	0	0	0	0	0	0	0	0	0	0	0	0	0	0	0	0	0	0	0	0.588	0.604	0.586	0.597	1.451	0.542	0.800	0.000	0.000	0.000	0.000	0.000	0.000	0.000	0.000	0.000	0.000	0.000	0.000	0.000	0.000	32	236	4211	3982	-0.765	Error	Error	1560	2651	0	0	1500	2482	0	0	0	0
3	1	14	""	"iYFR019W"	10350	28180	80	986	1088	727	99	108	48	98	96	0	841	983	570	65	73	69	100	100	0	0	0	0	0	0	0	0	0	0	0	0	0	0	0	0	0	0	0	1.143	1.077	1.049	0.904	1.980	1.152	0.880	0.000	0.000	0.000	0.000	0.000	0.000	0.000	0.000	0.000	0.000	0.000	0.000	0.000	0.000	52	340	1663	1907	0.193	Error	Error	887	776	0	0	989	918	0	0	0	0
3	2	14	""	"iYFR021W"	10540	28180	80	3116	3190	1355	101	107	45	100	100	0	3171	2728	1201	65	70	26	100	100	0	0	0	0	0	0	0	0	0	0	0	0	0	0	0	0	0	0	0	0.971	1.160	1.185	1.289	1.731	1.158	0.908	0.000	0.000	0.000	0.000	0.000	0.000	0.000	0.000	0.000	0.000	0.000	0.000	0.000	0.000	52	340	6121	5752	-0.043	Error	Error	3015	3106	0	0	3089	2663	0	0	0	0
3	3	14	""	"iYFR025C"	10740	28180	70	406	452	261	104	108	48	90	84	0	400	434	232	65	69	25	93	93	0	0	0	0	0	0	0	0	0	0	0	0	0	0	0	0	0	0	0	0.901	0.943	0.964	0.852	2.648	1.046	0.679	0.000	0.000	0.000	0.000	0.000	0.000	0.000	0.000	0.000	0.000	0.000	0.000	0.000	0.000	32	236	637	717	-0.150	Error	Error	302	335	0	0	348	369	0	0	0	0
3	4	14	""	"iYGL013C"	10940	28180	80	3348	3212	897	103	112	51	100	100	0	3866	3880	658	64	71	31	100	100	0	0	0	0	0	0	0	0	0	0	0	0	0	0	0	0	0	0	0	0.853	0.815	0.797	0.785	1.417	0.813	0.859	0.000	0.000	0.000	0.000	0.000	0.000	0.000	0.000	0.000	0.000	0.000	0.000	0.000	0.000	52	340	7047	6925	-0.229	Error	Error	3245	3802	0	0	3109	3816	0	0	0	0
3	5	14	""	"iYGL009C"	11130	28180	90	3007	4263	3639	111	120	61	100	100	0	2723	3175	2437	66	73	33	98	98	0	0	0	0	0	0	0	0	0	0	0	0	0	0	0	0	0	0	0	1.090	1.335	1.384	1.478	2.425	1.426	0.886	0.000	0.000	0.000	0.000	0.000	0.000	0.000	0.000	0.000	0.000	0.000	0.000	0.000	0.000	52	420	5553	7261	0.124	Error	Error	2896	2657	0	0	4152	3109	0	0	0	0
3	6	14	""	"iYGL006W"	11350	28180	80	822	818	373	111	117	53	92	92	0	5672	5158	1680	69	79	42	100	100	0	0	0	0	0	0	0	0	0	0	0	0	0	0	0	0	0	0	0	0.127	0.139	0.135	0.122	1.805	0.139	0.801	0.000	0.000	0.000	0.000	0.000	0.000	0.000	0.000	0.000	0.000	0.000	0.000	0.000	0.000	52	340	6314	5796	-2.978	Error	Error	711	5603	0	0	707	5089	0	0	0	0
3	7	14	""	"iYGR011W"	11540	28180	80	2447	2647	1639	113	123	51	100	100	0	1966	2102	1364	72	81	44	96	92	0	0	0	0	0	0	0	0	0	0	0	0	0	0	0	0	0	0	0	1.232	1.248	1.369	1.506	2.388	1.243	0.865	0.000	0.000	0.000	0.000	0.000	0.000	0.000	0.000	0.000	0.000	0.000	0.000	0.000	0.000	52	340	4228	4564	0.301	Error	Error	2334	1894	0	0	2534	2030	0	0	0	0
3	8	14	""	"iYGR015C"	11740	28180	80	1591	1702	836	109	119	54	100	100	0	2842	2464	1235	72	80	35	100	98	0	0	0	0	0	0	0	0	0	0	0	0	0	0	0	0	0	0	0	0.535	0.666	0.696	0.698	2.127	0.642	0.826	0.000	0.000	0.000	0.000	0.000	0.000	0.000	0.000	0.000	0.000	0.000	0.000	0.000	0.000	52	340	4252	3985	-0.902	Error	Error	1482	2770	0	0	1593	2392	0	0	0	0
3	9	14	""	"iYGR020C"	11940	28180	80	3570	3050	1314	114	119	56	100	100	0	3166	2876	1067	68	75	31	100	100	0	0	0	0	0	0	0	0	0	0	0	0	0	0	0	0	0	0	0	1.116	1.046	1.058	0.984	1.686	1.083	0.857	0.000	0.000	0.000	0.000	0.000	0.000	0.000	0.000	0.000	0.000	0.000	0.000	0.000	0.000	52	340	6554	5744	0.158	Error	Error	3456	3098	0	0	2936	2808	0	0	0	0
3	10	14	""	"iYGR034W"	12140	28180	80	1144	1804	1296	108	115	68	100	100	0	3142	3757	2613	69	77	39	100	98	0	0	0	0	0	0	0	0	0	0	0	0	0	0	0	0	0	0	0	0.337	0.460	0.428	0.515	2.405	0.450	0.857	0.000	0.000	0.000	0.000	0.000	0.000	0.000	0.000	0.000	0.000	0.000	0.000	0.000	0.000	52	340	4109	5384	-1.569	Error	Error	1036	3073	0	0	1696	3688	0	0	0	0
3	11	14	""	"iYGR038W"	12350	28180	60	1962	2505	2066	111	115	52	100	100	0	1619	2181	1772	69	77	35	100	100	0	0	0	0	0	0	0	0	0	0	0	0	0	0	0	0	0	0	0	1.194	1.134	1.105	1.023	2.330	1.163	0.861	0.000	0.000	0.000	0.000	0.000	0.000	0.000	0.000	0.000	0.000	0.000	0.000	0.000	0.000	32	176	3401	4506	0.256	Error	Error	1851	1550	0	0	2394	2112	0	0	0	0
3	12	14	""	"iYGR039W"	12550	28180	60	2057	2142	1202	104	110	48	100	100	0	871	906	445	68	77	39	100	100	0	0	0	0	0	0	0	0	0	0	0	0	0	0	0	0	0	0	0	2.432	2.432	2.235	2.327	1.709	2.696	0.830	0.000	0.000	0.000	0.000	0.000	0.000	0.000	0.000	0.000	0.000	0.000	0.000	0.000	0.000	32	176	2756	2876	1.282	Error	Error	1953	803	0	0	2038	838	0	0	0	0
3	13	14	""	"iYGR055W"	12750	28180	80	2612	3070	1534	100	106	49	100	100	0	1390	1410	573	67	75	30	100	100	0	0	0	0	0	0	0	0	0	0	0	0	0	0	0	0	0	0	0	1.899	2.211	2.296	2.122	1.529	2.432	0.857	0.000	0.000	0.000	0.000	0.000	0.000	0.000	0.000	0.000	0.000	0.000	0.000	0.000	0.000	52	340	3835	4313	0.925	Error	Error	2512	1323	0	0	2970	1343	0	0	0	0
3	14	14	""	"iYGR059W"	12950	28190	80	2346	6284	14034	111	118	50	98	98	1	1320	2214	5612	68	75	31	96	96	0	0	0	0	0	0	0	0	0	0	0	0	0	0	0	0	0	0	0	1.785	2.877	1.739	2.133	3.177	2.563	0.564	0.000	0.000	0.000	0.000	0.000	0.000	0.000	0.000	0.000	0.000	0.000	0.000	0.000	0.000	52	340	3487	8319	0.836	Error	Error	2235	1252	0	0	6173	2146	0	0	0	0
3	15	14	""	"iYGR062C"	13150	28180	80	804	1239	1131	121	136	76	92	90	0	589	817	656	70	84	46	96	90	0	0	0	0	0	0	0	0	0	0	0	0	0	0	0	0	0	0	0	1.316	1.497	1.321	1.326	2.405	1.720	0.792	0.000	0.000	0.000	0.000	0.000	0.000	0.000	0.000	0.000	0.000	0.000	0.000	0.000	0.000	52	340	1202	1865	0.396	Error	Error	683	519	0	0	1118	747	0	0	0	0
3	16	14	""	"iYHR001W"	13350	28180	80	1732	1847	1111	124	136	63	96	96	0	6970	6836	3363	83	95	55	100	100	0	0	0	0	0	0	0	0	0	0	0	0	0	0	0	0	0	0	0	0.233	0.255	0.250	0.228	1.773	0.257	0.853	0.000	0.000	0.000	0.000	0.000	0.000	0.000	0.000	0.000	0.000	0.000	0.000	0.000	0.000	52	340	8495	8476	-2.099	Error	Error	1608	6887	0	0	1723	6753	0	0	0	0
3	17	14	""	"iYHR004C"	13550	28180	80	2170	2030	648	123	129	61	100	100	0	3766	3422	1286	72	83	40	100	100	0	0	0	0	0	0	0	0	0	0	0	0	0	0	0	0	0	0	0	0.554	0.569	0.558	0.586	1.590	0.531	0.865	0.000	0.000	0.000	0.000	0.000	0.000	0.000	0.000	0.000	0.000	0.000	0.000	0.000	0.000	52	340	5741	5257	-0.852	Error	Error	2047	3694	0	0	1907	3350	0	0	0	0
3	18	14	""	"iYHRCdelta4"	13750	28170	90	7291	6847	1772	114	125	58	100	100	0	7196	6596	1928	71	80	35	100	100	0	0	0	0	0	0	0	0	0	0	0	0	0	0	0	0	0	0	0	1.007	1.032	1.018	1.091	1.748	0.988	0.875	0.000	0.000	0.000	0.000	0.000	0.000	0.000	0.000	0.000	0.000	0.000	0.000	0.000	0.000	52	420	14302	13258	0.010	Error	Error	7177	7125	0	0	6733	6525	0	0	0	0
3	19	14	""	"iYHR017W"	13950	28180	70	1160	1130	646	117	126	61	100	100	0	1474	1546	921	73	79	32	100	96	0	0	0	0	0	0	0	0	0	0	0	0	0	0	0	0	0	0	0	0.744	0.688	0.701	0.722	2.021	0.680	0.836	0.000	0.000	0.000	0.000	0.000	0.000	0.000	0.000	0.000	0.000	0.000	0.000	0.000	0.000	32	236	2444	2486	-0.426	Error	Error	1043	1401	0	0	1013	1473	0	0	0	0
3	20	14	""	"iYHRCsigma2"	14150	28170	90	370	934	1167	112	124	65	80	69	0	384	1059	1350	72	81	40	86	82	0	0	0	0	0	0	0	0	0	0	0	0	0	0	0	0	0	0	0	0.827	0.833	0.806	0.727	3.291	0.837	0.794	0.000	0.000	0.000	0.000	0.000	0.000	0.000	0.000	0.000	0.000	0.000	0.000	0.000	0.000	52	420	570	1809	-0.274	Error	Error	258	312	0	0	822	987	0	0	0	0
3	21	14	""	"iYHR023W"	14350	28170	80	1020	1483	1136	107	123	83	98	92	0	2546	3351	2552	72	83	40	100	100	0	0	0	0	0	0	0	0	0	0	0	0	0	0	0	0	0	0	0	0.369	0.420	0.439	0.410	2.258	0.402	0.834	0.000	0.000	0.000	0.000	0.000	0.000	0.000	0.000	0.000	0.000	0.000	0.000	0.000	0.000	52	340	3387	4655	-1.438	Error	Error	913	2474	0	0	1376	3279	0	0	0	0
3	1	15	""	"iYHR039C"	10340	28380	70	845	822	344	100	108	51	96	96	0	779	777	294	65	69	26	100	100	0	0	0	0	0	0	0	0	0	0	0	0	0	0	0	0	0	0	0	1.043	1.014	1.025	0.955	1.745	1.024	0.831	0.000	0.000	0.000	0.000	0.000	0.000	0.000	0.000	0.000	0.000	0.000	0.000	0.000	0.000	32	236	1459	1434	0.061	Error	Error	745	714	0	0	722	712	0	0	0	0
3	2	15	""	"iYHR042W"	10550	28380	80	1009	1316	1048	102	111	51	94	90	0	1299	1698	1255	65	71	28	100	100	0	0	0	0	0	0	0	0	0	0	0	0	0	0	0	0	0	0	0	0.735	0.743	0.711	0.622	2.095	0.771	0.853	0.000	0.000	0.000	0.000	0.000	0.000	0.000	0.000	0.000	0.000	0.000	0.000	0.000	0.000	52	340	2141	2847	-0.444	Error	Error	907	1234	0	0	1214	1633	0	0	0	0
3	3	15	""	"iYHR046C"	10750	28380	90	1905	2092	965	102	110	56	100	100	0	3759	3535	1718	63	72	49	100	100	0	0	0	0	0	0	0	0	0	0	0	0	0	0	0	0	0	0	0	0.488	0.573	0.593	0.581	1.486	0.546	0.889	0.000	0.000	0.000	0.000	0.000	0.000	0.000	0.000	0.000	0.000	0.000	0.000	0.000	0.000	52	420	5499	5462	-1.036	Error	Error	1803	3696	0	0	1990	3472	0	0	0	0
3	4	15	""	"iYHR060W"	10950	28380	90	955	1366	1003	103	111	60	100	100	0	1192	1554	1035	65	69	25	100	100	0	0	0	0	0	0	0	0	0	0	0	0	0	0	0	0	0	0	0	0.756	0.848	0.823	0.804	1.573	0.891	0.891	0.000	0.000	0.000	0.000	0.000	0.000	0.000	0.000	0.000	0.000	0.000	0.000	0.000	0.000	52	420	1979	2752	-0.404	Error	Error	852	1127	0	0	1263	1489	0	0	0	0
3	5	15	""	"iYHR064C"	11150	28380	80	2289	2387	1380	108	115	55	100	100	0	909	995	497	67	73	31	100	100	0	0	0	0	0	0	0	0	0	0	0	0	0	0	0	0	0	0	0	2.590	2.456	2.421	2.261	1.600	2.678	0.884	0.000	0.000	0.000	0.000	0.000	0.000	0.000	0.000	0.000	0.000	0.000	0.000	0.000	0.000	52	340	3023	3207	1.373	Error	Error	2181	842	0	0	2279	928	0	0	0	0
3	6	15	""	"iYHR068W"	11350	28380	90	1221	1631	1208	103	111	51	98	98	0	1901	2479	1874	67	73	30	100	100	0	0	0	0	0	0	0	0	0	0	0	0	0	0	0	0	0	0	0	0.610	0.633	0.627	0.665	2.565	0.621	0.877	0.000	0.000	0.000	0.000	0.000	0.000	0.000	0.000	0.000	0.000	0.000	0.000	0.000	0.000	52	420	2952	3940	-0.714	Error	Error	1118	1834	0	0	1528	2412	0	0	0	0
3	7	15	""	"iYIL023C"	11540	28380	80	2099	2465	1287	110	120	62	100	100	0	1133	1048	533	70	80	37	96	94	0	0	0	0	0	0	0	0	0	0	0	0	0	0	0	0	0	0	0	1.871	2.408	2.499	2.607	2.304	2.572	0.841	0.000	0.000	0.000	0.000	0.000	0.000	0.000	0.000	0.000	0.000	0.000	0.000	0.000	0.000	52	340	3052	3333	0.904	Error	Error	1989	1063	0	0	2355	978	0	0	0	0
3	8	15	""	"iYIL019W"	11740	28380	80	5024	5306	2163	104	113	59	100	100	0	3469	3015	1182	71	81	45	100	100	0	0	0	0	0	0	0	0	0	0	0	0	0	0	0	0	0	0	0	1.448	1.767	1.832	1.769	1.611	1.851	0.842	0.000	0.000	0.000	0.000	0.000	0.000	0.000	0.000	0.000	0.000	0.000	0.000	0.000	0.000	52	340	8318	8146	0.534	Error	Error	4920	3398	0	0	5202	2944	0	0	0	0
3	9	15	""	"iYIL015W"	11940	28390	60	480	560	353	109	118	56	96	90	0	424	470	252	73	84	45	96	90	0	0	0	0	0	0	0	0	0	0	0	0	0	0	0	0	0	0	0	1.057	1.136	1.093	1.024	2.171	1.265	0.748	0.000	0.000	0.000	0.000	0.000	0.000	0.000	0.000	0.000	0.000	0.000	0.000	0.000	0.000	32	176	722	848	0.080	Error	Error	371	351	0	0	451	397	0	0	0	0
3	10	15	""	"iYIL005W"	12140	28380	70	1271	1205	760	109	113	50	100	96	0	4137	4457	2837	70	76	36	100	100	0	0	0	0	0	0	0	0	0	0	0	0	0	0	0	0	0	0	0	0.286	0.250	0.242	0.239	1.724	0.241	0.872	0.000	0.000	0.000	0.000	0.000	0.000	0.000	0.000	0.000	0.000	0.000	0.000	0.000	0.000	32	236	5229	5483	-1.807	Error	Error	1162	4067	0	0	1096	4387	0	0	0	0
3	11	15	""	"iYIL001W"	12340	28380	70	263	341	232	102	120	160	50	28	0	1370	1592	1090	68	83	88	100	96	0	0	0	0	0	0	0	0	0	0	0	0	0	0	0	0	0	0	0	0.124	0.157	0.140	0.139	2.165	0.157	0.694	0.000	0.000	0.000	0.000	0.000	0.000	0.000	0.000	0.000	0.000	0.000	0.000	0.000	0.000	32	236	1463	1763	-3.016	Error	Error	161	1302	0	0	239	1524	0	0	0	0
3	12	15	""	"iYIR003W"	12550	28380	80	379	499	363	105	114	53	90	78	0	859	1050	642	66	73	36	100	100	0	0	0	0	0	0	0	0	0	0	0	0	0	0	0	0	0	0	0	0.346	0.400	0.367	0.313	2.225	0.431	0.776	0.000	0.000	0.000	0.000	0.000	0.000	0.000	0.000	0.000	0.000	0.000	0.000	0.000	0.000	52	340	1067	1378	-1.533	Error	Error	274	793	0	0	394	984	0	0	0	0
3	13	15	""	"iYIR018W-0"	12740	28380	90	6448	6265	1655	103	110	55	100	100	0	10642	9917	2706	67	75	33	100	100	0	0	0	0	0	0	0	0	0	0	0	0	0	0	0	0	0	0	0	0.600	0.626	0.593	0.655	1.630	0.599	0.862	0.000	0.000	0.000	0.000	0.000	0.000	0.000	0.000	0.000	0.000	0.000	0.000	0.000	0.000	52	420	16920	16012	-0.737	Error	Error	6345	10575	0	0	6162	9850	0	0	0	0
3	14	15	""	"iYIR020C"	12950	28380	80	2030	1768	941	111	122	63	98	94	0	1546	1585	688	68	74	32	100	100	0	0	0	0	0	0	0	0	0	0	0	0	0	0	0	0	0	0	0	1.298	1.092	1.134	0.872	2.371	1.166	0.865	0.000	0.000	0.000	0.000	0.000	0.000	0.000	0.000	0.000	0.000	0.000	0.000	0.000	0.000	52	340	3397	3174	0.377	Error	Error	1919	1478	0	0	1657	1517	0	0	0	0
3	15	15	""	"iYIR022W"	13150	28370	80	3159	2797	1437	109	115	57	100	98	0	1521	1307	664	66	71	31	98	96	0	0	0	0	0	0	0	0	0	0	0	0	0	0	0	0	0	0	0	2.096	2.166	2.163	2.260	2.201	2.307	0.831	0.000	0.000	0.000	0.000	0.000	0.000	0.000	0.000	0.000	0.000	0.000	0.000	0.000	0.000	52	340	4505	3929	1.068	Error	Error	3050	1455	0	0	2688	1241	0	0	0	0
3	16	15	""	"iYIR038C-0"	13350	28380	80	4191	3907	1335	105	108	53	100	100	0	3359	3255	546	66	72	31	100	100	0	0	0	0	0	0	0	0	0	0	0	0	0	0	0	0	0	0	0	1.241	1.192	1.240	1.096	1.585	1.292	0.870	0.000	0.000	0.000	0.000	0.000	0.000	0.000	0.000	0.000	0.000	0.000	0.000	0.000	0.000	52	340	7379	6991	0.311	Error	Error	4086	3293	0	0	3802	3189	0	0	0	0
3	17	15	""	"iYIRCdelta6-2"	13550	28370	80	6063	5866	2398	108	116	53	100	100	0	4905	4467	1267	67	75	32	100	100	0	0	0	0	0	0	0	0	0	0	0	0	0	0	0	0	0	0	0	1.231	1.309	1.265	1.197	1.704	1.378	0.889	0.000	0.000	0.000	0.000	0.000	0.000	0.000	0.000	0.000	0.000	0.000	0.000	0.000	0.000	52	340	10793	10158	0.300	Error	Error	5955	4838	0	0	5758	4400	0	0	0	0
3	18	15	""	"iYIR042C"	13750	28370	80	5031	4569	2028	110	121	59	98	98	0	4093	3737	1332	69	76	32	100	100	0	0	0	0	0	0	0	0	0	0	0	0	0	0	0	0	0	0	0	1.223	1.216	1.192	1.097	1.908	1.269	0.894	0.000	0.000	0.000	0.000	0.000	0.000	0.000	0.000	0.000	0.000	0.000	0.000	0.000	0.000	52	340	8945	8127	0.290	Error	Error	4921	4024	0	0	4459	3668	0	0	0	0
3	19	15	""	"iYJR076C"	13950	28370	90	1818	2076	1204	101	117	68	100	100	0	1909	2142	1175	70	81	38	100	100	0	0	0	0	0	0	0	0	0	0	0	0	0	0	0	0	0	0	0	0.934	0.953	0.909	0.945	1.664	0.960	0.870	0.000	0.000	0.000	0.000	0.000	0.000	0.000	0.000	0.000	0.000	0.000	0.000	0.000	0.000	52	420	3556	4047	-0.099	Error	Error	1717	1839	0	0	1975	2072	0	0	0	0
3	20	15	""	"iYJR083C"	14150	28370	80	1337	1264	426	105	118	67	100	100	0	806	770	283	73	82	35	98	96	0	0	0	0	0	0	0	0	0	0	0	0	0	0	0	0	0	0	0	1.681	1.663	1.663	1.818	2.088	1.693	0.802	0.000	0.000	0.000	0.000	0.000	0.000	0.000	0.000	0.000	0.000	0.000	0.000	0.000	0.000	52	340	1965	1856	0.749	Error	Error	1232	733	0	0	1159	697	0	0	0	0
3	21	15	""	"iYJR089W"	14350	28380	90	2026	1956	614	114	123	70	100	100	0	5665	5393	1726	77	87	40	100	100	0	0	0	0	0	0	0	0	0	0	0	0	0	0	0	0	0	0	0	0.342	0.347	0.357	0.349	1.365	0.309	0.828	0.000	0.000	0.000	0.000	0.000	0.000	0.000	0.000	0.000	0.000	0.000	0.000	0.000	0.000	52	420	7500	7158	-1.547	Error	Error	1912	5588	0	0	1842	5316	0	0	0	0
3	1	16	""	"iYJR102C"	10340	28580	80	2130	1973	560	106	109	47	100	100	0	1330	1200	468	64	71	28	98	94	0	0	0	0	0	0	0	0	0	0	0	0	0	0	0	0	0	0	0	1.599	1.643	1.613	1.822	1.922	1.615	0.855	0.000	0.000	0.000	0.000	0.000	0.000	0.000	0.000	0.000	0.000	0.000	0.000	0.000	0.000	52	332	3290	3003	0.677	Error	Error	2024	1266	0	0	1867	1136	0	0	0	0
3	2	16	""	"iYJR106W"	10540	28580	80	1214	1240	395	101	117	123	100	98	0	1749	1621	644	67	73	30	100	96	0	0	0	0	0	0	0	0	0	0	0	0	0	0	0	0	0	0	0	0.662	0.733	0.695	0.858	2.370	0.686	0.800	0.000	0.000	0.000	0.000	0.000	0.000	0.000	0.000	0.000	0.000	0.000	0.000	0.000	0.000	52	340	2795	2693	-0.596	Error	Error	1113	1682	0	0	1139	1554	0	0	0	0
3	3	16	""	"iYJR110W"	10730	28580	70	949	1137	755	101	113	65	96	93	0	1780	2147	1449	64	79	68	100	100	0	0	0	0	0	0	0	0	0	0	0	0	0	0	0	0	0	0	0	0.494	0.497	0.505	0.482	2.128	0.471	0.862	0.000	0.000	0.000	0.000	0.000	0.000	0.000	0.000	0.000	0.000	0.000	0.000	0.000	0.000	32	236	2564	3119	-1.017	Error	Error	848	1716	0	0	1036	2083	0	0	0	0
3	4	16	""	"iYJR128W"	10940	28570	70	2045	1986	447	101	112	70	100	100	0	755	694	209	66	78	60	93	93	0	0	0	0	0	0	0	0	0	0	0	0	0	0	0	0	0	0	0	2.821	3.002	2.989	3.104	1.631	3.078	0.849	0.000	0.000	0.000	0.000	0.000	0.000	0.000	0.000	0.000	0.000	0.000	0.000	0.000	0.000	32	236	2633	2513	1.496	Error	Error	1944	689	0	0	1885	628	0	0	0	0
3	5	16	""	"iYJR132W"	11150	28580	80	1478	1408	416	99	111	55	100	100	0	2658	2681	738	69	76	33	100	100	0	0	0	0	0	0	0	0	0	0	0	0	0	0	0	0	0	0	0	0.533	0.501	0.457	0.495	1.451	0.482	0.829	0.000	0.000	0.000	0.000	0.000	0.000	0.000	0.000	0.000	0.000	0.000	0.000	0.000	0.000	52	340	3968	3921	-0.909	Error	Error	1379	2589	0	0	1309	2612	0	0	0	0
3	6	16	""	"iYJR136C"	11340	28580	70	579	588	247	109	116	52	100	96	0	528	512	211	70	78	38	100	100	0	0	0	0	0	0	0	0	0	0	0	0	0	0	0	0	0	0	0	1.026	1.084	0.969	1.057	1.615	1.154	0.726	0.000	0.000	0.000	0.000	0.000	0.000	0.000	0.000	0.000	0.000	0.000	0.000	0.000	0.000	32	236	928	921	0.037	Error	Error	470	458	0	0	479	442	0	0	0	0
3	7	16	""	"iYJR151C-1"	11550	28580	80	4781	4678	1160	112	120	54	100	100	0	2019	2046	352	67	76	36	100	100	0	0	0	0	0	0	0	0	0	0	0	0	0	0	0	0	0	0	0	2.392	2.307	2.318	2.247	1.401	2.397	0.869	0.000	0.000	0.000	0.000	0.000	0.000	0.000	0.000	0.000	0.000	0.000	0.000	0.000	0.000	52	340	6621	6545	1.258	Error	Error	4669	1952	0	0	4566	1979	0	0	0	0
3	8	16	""	"iYJR153W-1"	11750	28580	90	3281	3247	579	106	116	61	100	100	0	2276	2310	304	70	82	46	100	100	0	0	0	0	0	0	0	0	0	0	0	0	0	0	0	0	0	0	0	1.439	1.402	1.401	1.390	1.224	1.488	0.862	0.000	0.000	0.000	0.000	0.000	0.000	0.000	0.000	0.000	0.000	0.000	0.000	0.000	0.000	52	420	5381	5381	0.525	Error	Error	3175	2206	0	0	3141	2240	0	0	0	0
3	9	16	""	"iYJR157W-0"	11950	28580	80	7282	7116	3180	109	115	53	100	100	0	14527	13460	3269	73	85	49	100	100	0	0	0	0	0	0	0	0	0	0	0	0	0	0	0	0	0	0	0	0.496	0.523	0.505	0.447	1.754	0.550	0.858	0.000	0.000	0.000	0.000	0.000	0.000	0.000	0.000	0.000	0.000	0.000	0.000	0.000	0.000	52	340	21627	20394	-1.011	Error	Error	7173	14454	0	0	7007	13387	0	0	0	0
3	10	16	""	"iYKR051W"	12150	28580	80	1646	1708	660	103	111	54	100	100	0	5267	5044	1653	71	81	41	100	100	0	0	0	0	0	0	0	0	0	0	0	0	0	0	0	0	0	0	0	0.297	0.323	0.325	0.310	1.606	0.302	0.806	0.000	0.000	0.000	0.000	0.000	0.000	0.000	0.000	0.000	0.000	0.000	0.000	0.000	0.000	52	340	6739	6578	-1.752	Error	Error	1543	5196	0	0	1605	4973	0	0	0	0
3	11	16	""	"iYKR055W"	12340	28580	90	1782	1840	720	101	109	51	100	100	0	627	581	243	69	88	237	84	57	0	0	0	0	0	0	0	0	0	0	0	0	0	0	0	0	0	0	0	3.013	3.396	3.330	3.612	1.760	3.231	0.296	0.000	0.000	0.000	0.000	0.000	0.000	0.000	0.000	0.000	0.000	0.000	0.000	0.000	0.000	52	420	2239	2251	1.591	Error	Error	1681	558	0	0	1739	512	0	0	0	0
3	12	16	""	"iYKR059W"	12550	28580	80	745	709	359	106	116	58	96	92	0	488	497	181	69	79	42	100	100	0	0	0	0	0	0	0	0	0	0	0	0	0	0	0	0	0	0	0	1.525	1.409	1.362	1.253	1.722	1.639	0.752	0.000	0.000	0.000	0.000	0.000	0.000	0.000	0.000	0.000	0.000	0.000	0.000	0.000	0.000	52	340	1058	1031	0.609	Error	Error	639	419	0	0	603	428	0	0	0	0
3	13	16	""	"itK(UUU)K"	12740	28580	80	689	674	338	108	118	69	98	88	0	437	413	231	65	82	163	71	53	0	0	0	0	0	0	0	0	0	0	0	0	0	0	0	0	0	0	0	1.562	1.626	1.497	1.592	2.602	1.690	0.740	0.000	0.000	0.000	0.000	0.000	0.000	0.000	0.000	0.000	0.000	0.000	0.000	0.000	0.000	52	340	953	914	0.643	Error	Error	581	372	0	0	566	348	0	0	0	0
3	14	16	""	"iYKR076W"	12950	28580	80	2227	2029	963	112	119	58	100	98	0	1569	1420	609	67	73	27	100	100	0	0	0	0	0	0	0	0	0	0	0	0	0	0	0	0	0	0	0	1.408	1.417	1.422	1.343	1.794	1.504	0.849	0.000	0.000	0.000	0.000	0.000	0.000	0.000	0.000	0.000	0.000	0.000	0.000	0.000	0.000	52	340	3617	3270	0.494	Error	Error	2115	1502	0	0	1917	1353	0	0	0	0
3	15	16	""	"iYKR080W"	13150	28580	80	726	856	534	100	111	51	100	98	0	692	862	616	67	72	29	98	96	0	0	0	0	0	0	0	0	0	0	0	0	0	0	0	0	0	0	0	1.002	0.951	0.953	1.049	2.158	0.901	0.828	0.000	0.000	0.000	0.000	0.000	0.000	0.000	0.000	0.000	0.000	0.000	0.000	0.000	0.000	52	340	1251	1551	0.002	Error	Error	626	625	0	0	756	795	0	0	0	0
3	16	16	""	"iYKR095W"	13350	28580	80	6970	7231	3496	111	119	60	100	100	0	4463	3938	1432	64	72	29	100	100	0	0	0	0	0	0	0	0	0	0	0	0	0	0	0	0	0	0	0	1.559	1.838	1.921	1.685	1.644	2.029	0.834	0.000	0.000	0.000	0.000	0.000	0.000	0.000	0.000	0.000	0.000	0.000	0.000	0.000	0.000	52	340	11258	10994	0.641	Error	Error	6859	4399	0	0	7120	3874	0	0	0	0
3	17	16	""	"iYKR099W"	13550	28580	80	3487	3410	1558	111	119	59	100	100	0	4848	4607	1585	64	75	44	100	100	0	0	0	0	0	0	0	0	0	0	0	0	0	0	0	0	0	0	0	0.706	0.726	0.755	0.684	1.549	0.756	0.882	0.000	0.000	0.000	0.000	0.000	0.000	0.000	0.000	0.000	0.000	0.000	0.000	0.000	0.000	52	340	8160	7842	-0.503	Error	Error	3376	4784	0	0	3299	4543	0	0	0	0
3	18	16	""	"iYKR101W-2"	13750	28580	80	6366	5990	2525	108	121	63	100	100	0	2874	2705	773	68	75	33	100	100	0	0	0	0	0	0	0	0	0	0	0	0	0	0	0	0	0	0	0	2.230	2.231	2.286	2.117	1.442	2.490	0.870	0.000	0.000	0.000	0.000	0.000	0.000	0.000	0.000	0.000	0.000	0.000	0.000	0.000	0.000	52	340	9064	8519	1.157	Error	Error	6258	2806	0	0	5882	2637	0	0	0	0
3	19	16	""	"iYLL062C"	13950	28580	80	2418	2218	828	107	120	65	100	100	0	1697	1636	492	65	72	27	100	100	0	0	0	0	0	0	0	0	0	0	0	0	0	0	0	0	0	0	0	1.416	1.344	1.375	1.284	1.547	1.430	0.843	0.000	0.000	0.000	0.000	0.000	0.000	0.000	0.000	0.000	0.000	0.000	0.000	0.000	0.000	52	340	3943	3682	0.502	Error	Error	2311	1632	0	0	2111	1571	0	0	0	0
3	20	16	""	"iYLL058W"	14150	28580	90	1489	1444	462	108	116	53	100	100	0	2729	2593	1066	71	78	36	100	100	0	0	0	0	0	0	0	0	0	0	0	0	0	0	0	0	0	0	0	0.520	0.530	0.524	0.574	1.849	0.480	0.779	0.000	0.000	0.000	0.000	0.000	0.000	0.000	0.000	0.000	0.000	0.000	0.000	0.000	0.000	52	420	4039	3858	-0.945	Error	Error	1381	2658	0	0	1336	2522	0	0	0	0
3	21	16	""	"iYLL055W"	14360	28580	90	3519	3137	1267	114	122	70	100	100	0	8938	8528	1828	76	86	55	100	100	0	0	0	0	0	0	0	0	0	0	0	0	0	0	0	0	0	0	0	0.384	0.358	0.364	0.318	1.698	0.372	0.860	0.000	0.000	0.000	0.000	0.000	0.000	0.000	0.000	0.000	0.000	0.000	0.000	0.000	0.000	52	420	12267	11475	-1.380	Error	Error	3405	8862	0	0	3023	8452	0	0	0	0
3	1	17	""	"iYLRWdelta14"	10340	28790	90	551	609	275	108	117	54	98	94	0	907	927	448	63	72	38	100	100	0	0	0	0	0	0	0	0	0	0	0	0	0	0	0	0	0	0	0	0.525	0.580	0.504	0.562	1.901	0.568	0.743	0.000	0.000	0.000	0.000	0.000	0.000	0.000	0.000	0.000	0.000	0.000	0.000	0.000	0.000	52	412	1287	1365	-0.930	Error	Error	443	844	0	0	501	864	0	0	0	0
3	2	17	""	"iYLR259C"	10540	28780	70	5065	4199	2437	114	116	41	100	100	0	2355	2195	1285	70	79	42	100	100	0	0	0	0	0	0	0	0	0	0	0	0	0	0	0	0	0	0	0	2.167	1.922	2.035	1.925	1.487	1.946	0.900	0.000	0.000	0.000	0.000	0.000	0.000	0.000	0.000	0.000	0.000	0.000	0.000	0.000	0.000	32	236	7236	6210	1.116	Error	Error	4951	2285	0	0	4085	2125	0	0	0	0
3	3	17	""	"iYLR263W"	10740	28780	80	967	1160	590	107	112	52	100	100	0	749	798	388	70	77	34	100	98	0	0	0	0	0	0	0	0	0	0	0	0	0	0	0	0	0	0	0	1.267	1.446	1.456	1.461	1.734	1.522	0.834	0.000	0.000	0.000	0.000	0.000	0.000	0.000	0.000	0.000	0.000	0.000	0.000	0.000	0.000	52	340	1539	1781	0.341	Error	Error	860	679	0	0	1053	728	0	0	0	0
3	4	17	""	"iYLR281C"	10950	28780	70	379	435	216	108	115	49	87	84	0	323	331	150	69	78	39	96	87	0	0	0	0	0	0	0	0	0	0	0	0	0	0	0	0	0	0	0	1.067	1.248	1.391	1.165	2.434	1.424	0.600	0.000	0.000	0.000	0.000	0.000	0.000	0.000	0.000	0.000	0.000	0.000	0.000	0.000	0.000	32	236	525	589	0.093	Error	Error	271	254	0	0	327	262	0	0	0	0
3	5	17	""	"iYLR286C"	11150	28780	80	3401	3571	2245	106	117	53	100	100	0	2619	2774	1596	72	79	31	100	100	0	0	0	0	0	0	0	0	0	0	0	0	0	0	0	0	0	0	0	1.294	1.282	1.216	1.170	1.641	1.337	0.911	0.000	0.000	0.000	0.000	0.000	0.000	0.000	0.000	0.000	0.000	0.000	0.000	0.000	0.000	52	340	5842	6167	0.371	Error	Error	3295	2547	0	0	3465	2702	0	0	0	0
3	6	17	""	"iYLR289W"	11350	28790	80	464	714	661	109	125	198	69	48	0	883	1536	1500	72	83	41	100	98	0	0	0	0	0	0	0	0	0	0	0	0	0	0	0	0	0	0	0	0.438	0.413	0.362	0.355	2.167	0.426	0.650	0.000	0.000	0.000	0.000	0.000	0.000	0.000	0.000	0.000	0.000	0.000	0.000	0.000	0.000	52	340	1166	2069	-1.192	Error	Error	355	811	0	0	605	1464	0	0	0	0
3	7	17	""	"iYLR304C"	11550	28780	70	1733	2351	1751	110	124	63	100	100	0	792	1156	835	74	83	38	100	100	0	0	0	0	0	0	0	0	0	0	0	0	0	0	0	0	0	0	0	2.260	2.071	1.836	2.025	1.929	2.176	0.871	0.000	0.000	0.000	0.000	0.000	0.000	0.000	0.000	0.000	0.000	0.000	0.000	0.000	0.000	32	236	2341	3323	1.177	Error	Error	1623	718	0	0	2241	1082	0	0	0	0
3	8	17	""	"iYLR308W"	11750	28780	70	601	1022	850	119	126	62	100	90	0	830	1548	1431	76	86	38	100	100	0	0	0	0	0	0	0	0	0	0	0	0	0	0	0	0	0	0	0	0.639	0.613	0.616	0.675	1.977	0.585	0.796	0.000	0.000	0.000	0.000	0.000	0.000	0.000	0.000	0.000	0.000	0.000	0.000	0.000	0.000	32	236	1236	2375	-0.646	Error	Error	482	754	0	0	903	1472	0	0	0	0
3	9	17	""	"iYLR312W-A"	11950	28780	80	1274	2360	2296	125	129	57	100	98	0	1912	3081	2596	81	93	55	100	100	0	0	0	0	0	0	0	0	0	0	0	0	0	0	0	0	0	0	0	0.628	0.745	0.674	0.638	2.226	0.807	0.870	0.000	0.000	0.000	0.000	0.000	0.000	0.000	0.000	0.000	0.000	0.000	0.000	0.000	0.000	52	340	2980	5235	-0.672	Error	Error	1149	1831	0	0	2235	3000	0	0	0	0
3	10	17	""	"iYLR330W"	12150	28780	80	2917	3500	2631	113	121	57	100	100	0	1308	1701	1116	76	92	52	100	100	0	0	0	0	0	0	0	0	0	0	0	0	0	0	0	0	0	0	0	2.276	2.084	1.975	1.939	1.852	2.300	0.872	0.000	0.000	0.000	0.000	0.000	0.000	0.000	0.000	0.000	0.000	0.000	0.000	0.000	0.000	52	340	4036	5012	1.186	Error	Error	2804	1232	0	0	3387	1625	0	0	0	0
3	11	17	""	"iSNR61"	12360	28780	80	342	525	434	106	115	50	88	80	0	302	468	346	70	76	32	100	96	0	0	0	0	0	0	0	0	0	0	0	0	0	0	0	0	0	0	0	1.017	1.053	1.013	0.959	2.209	1.170	0.764	0.000	0.000	0.000	0.000	0.000	0.000	0.000	0.000	0.000	0.000	0.000	0.000	0.000	0.000	52	340	468	817	0.025	Error	Error	236	232	0	0	419	398	0	0	0	0
3	12	17	""	"iYLRWdelta20"	12560	28780	70	941	1116	698	111	120	59	100	100	0	739	739	382	72	82	42	96	93	0	0	0	0	0	0	0	0	0	0	0	0	0	0	0	0	0	0	0	1.244	1.507	1.581	1.415	1.829	1.709	0.814	0.000	0.000	0.000	0.000	0.000	0.000	0.000	0.000	0.000	0.000	0.000	0.000	0.000	0.000	32	236	1497	1672	0.315	Error	Error	830	667	0	0	1005	667	0	0	0	0
3	13	17	""	"iYMR033W"	12750	28780	80	873	965	634	111	121	64	94	84	0	2238	2266	1368	74	90	164	98	92	0	0	0	0	0	0	0	0	0	0	0	0	0	0	0	0	0	0	0	0.352	0.390	0.371	0.350	2.356	0.394	0.852	0.000	0.000	0.000	0.000	0.000	0.000	0.000	0.000	0.000	0.000	0.000	0.000	0.000	0.000	52	340	2926	3046	-1.506	Error	Error	762	2164	0	0	854	2192	0	0	0	0
3	14	17	""	"iYMR037C"	12950	28770	70	1600	2781	2576	113	124	82	96	93	0	1092	1526	1446	69	79	42	100	90	0	0	0	0	0	0	0	0	0	0	0	0	0	0	0	0	0	0	0	1.454	1.831	1.873	1.862	2.489	1.892	0.849	0.000	0.000	0.000	0.000	0.000	0.000	0.000	0.000	0.000	0.000	0.000	0.000	0.000	0.000	32	236	2510	4125	0.540	Error	Error	1487	1023	0	0	2668	1457	0	0	0	0
3	15	17	""	"iYMR041C"	13150	28780	80	1025	1554	1175	116	126	64	98	98	0	497	628	425	75	82	39	96	94	0	0	0	0	0	0	0	0	0	0	0	0	0	0	0	0	0	0	0	2.154	2.600	2.621	2.587	1.744	2.773	0.903	0.000	0.000	0.000	0.000	0.000	0.000	0.000	0.000	0.000	0.000	0.000	0.000	0.000	0.000	52	340	1331	1991	1.107	Error	Error	909	422	0	0	1438	553	0	0	0	0
3	16	17	""	"iYMR054W"	13340	28780	70	894	1414	1169	110	119	64	93	93	0	1137	1503	1307	71	81	43	100	93	0	0	0	0	0	0	0	0	0	0	0	0	0	0	0	0	0	0	0	0.735	0.911	0.927	0.982	1.785	0.883	0.811	0.000	0.000	0.000	0.000	0.000	0.000	0.000	0.000	0.000	0.000	0.000	0.000	0.000	0.000	32	236	1850	2736	-0.443	Error	Error	784	1066	0	0	1304	1432	0	0	0	0
3	17	17	""	"iYMR058W"	13550	28790	70	1896	2057	1403	122	131	53	100	100	0	815	1214	862	72	76	34	96	96	0	0	0	0	0	0	0	0	0	0	0	0	0	0	0	0	0	0	0	2.388	1.694	1.710	1.820	2.186	1.745	0.818	0.000	0.000	0.000	0.000	0.000	0.000	0.000	0.000	0.000	0.000	0.000	0.000	0.000	0.000	32	236	2517	3077	1.256	Error	Error	1774	743	0	0	1935	1142	0	0	0	0
3	18	17	""	"iYMR063W"	13750	28780	70	1231	1315	722	118	132	93	96	93	0	577	618	282	74	86	79	100	90	0	0	0	0	0	0	0	0	0	0	0	0	0	0	0	0	0	0	0	2.213	2.200	2.068	1.976	2.270	2.550	0.760	0.000	0.000	0.000	0.000	0.000	0.000	0.000	0.000	0.000	0.000	0.000	0.000	0.000	0.000	32	236	1616	1741	1.146	Error	Error	1113	503	0	0	1197	544	0	0	0	0
3	19	17	""	"iYMR078C"	13940	28780	70	2666	3401	2282	112	121	60	100	100	0	2281	2534	1693	69	79	35	100	100	0	0	0	0	0	0	0	0	0	0	0	0	0	0	0	0	0	0	0	1.155	1.334	1.479	1.392	1.753	1.361	0.869	0.000	0.000	0.000	0.000	0.000	0.000	0.000	0.000	0.000	0.000	0.000	0.000	0.000	0.000	32	236	4766	5754	0.207	Error	Error	2554	2212	0	0	3289	2465	0	0	0	0
[truncated: 4,075,562 more chars]
